# Supplementary material
Source: PubMed Central journal article supplement (PMC4974349)
Supplement: 10.1074_M115.057760_mcp.M115.057760-1.pdf [file 10.1074_M115.057760_mcp.M115.057760-1.pdf]

## Supporting Information

# Label-free Quantification for Proteins in Single Embryonic Cells with Neural Fate in the Cleavage-stage Frog (*Xenopus laevis*) Embryo using CE-ESI-HRMS

Camille Lombard-Banek<sup>1</sup>, Sushma Reddy<sup>1,¶</sup>, Sally A. Moody<sup>2</sup>, and Peter Nemes<sup>1\*</sup>

<sup>1</sup>Department of Chemistry and <sup>2</sup>Department of Anatomy and Regenerative Biology, The George Washington University, Washington, DC; <sup>¶</sup>Thomas Jefferson High School for Science and Technology, Alexandria, VA

\*Correspondence to: Peter Nemes, 800 22<sup>nd</sup> Street, NW, Suite 4000, Washington, DC, 20052, [peter@gwu.edu](mailto:peter@gwu.edu), (Tel) 202-994-5663

**Table S2.** Representative peptides identified from vitellogenin b1 (Vtgb1). Separation of these peptides is shown in **Figure 2B**. A comprehensive set of peptides identified from Vtgb1 is listed in **Table S1A**. Key: z, charge; MT, migration time; N, theoretical number of plates for separation.

| <i>m/z</i><br>Measured | <i>z</i> | MT<br>(min) | Peptide Sequence                           | "-mer"<br>ID         | Start<br>Seq. | End<br>Seq. | Missed<br>Cleavage | N       |
|------------------------|----------|-------------|--------------------------------------------|----------------------|---------------|-------------|--------------------|---------|
| 460.2548               | 2+       | 16.11       | (R)SGIKLNCK(A)                             | 8-mer                | 50            | 57          | 1                  | 131,322 |
| 527.2951               | 2+       | 21.93       | (K)FIFSLSSPR(T)                            | 9-mer                | 1482          | 1490        | 0                  | 368,764 |
| 563.2950               | 2+       | 22.36       | (K)FLPGFSSGASR(L)                          | 11-mer               | 499           | 509         | 0                  | 363,435 |
| 580.7909               | 2+       | 17.92       | (R)NVGQQDSEKR(M)                           | 10-mer               | 921           | 930         | 1                  | 239,870 |
| 621.3696               | 2+       | 23.82       | (K)SPTVVITAQAVR(N)                         | 12 <sup>a</sup> -mer | 1345          | 1356        | 0                  | 363,435 |
| 460.9132               | 3+       | 16.09       | (K)QAKFIFSLSSPR(T)                         | 12 <sup>b</sup> -mer | 1479          | 1490        | 1                  | 143,602 |
| 641.8655               | 2+       | 18.89       | (K)AIGNAGQPASIKR(I)                        | 13-mer               | 483           | 495         | 1                  | 227,959 |
| 932.5036               | 2+       | 26.17       | (R)VALNIMNPVF<br>DQLSFR(Y)                 | 16-mer               | 613           | 628         | 0                  | 246,759 |
| 782.7384               | 3+       | 28.72       | (R)NGQVGNIFAA<br>EDVSETALNI QR(G)          | 22-mer               | 113           | 134         | 0                  | 229,784 |
| 780.4001               | 4+       | 19.4        | (K)NAESQVVETL<br>QHLVQNNQEL<br>VHGESTSK(F) | 28-mer               | 305           | 332         | 0                  | 279,770 |

**Table S3.** Enhancing peptide sequencing to boost protein identifications in limited amounts, ~20 ng, of protein digests from the 16-cell *Xenopus* embryo. Each sample was measured in technical triplicate. Asterisk (\*) marks optimal experimental conditions (see identified proteins in **Table S1B**).

| Experimental Condition                   | Peptides |            | Protein groups |            |
|------------------------------------------|----------|------------|----------------|------------|
|                                          | Average  | Cumulative | Average        | Cumulative |
| <b>Sheath Flow</b>                       |          |            |                |            |
| 50% MeOH, 0.1% FA                        | 292 ± 28 | 369        | 54 ± 7         | 74*        |
| 10% DMSO in 50% MeOH,<br>0.1% FA         | 246 ± 12 | 277        | 27 ± 5         | 32         |
| 100 mM sulfolane in 50%<br>MeOH, 0.1% FA | 156 ± 6  | 177        | 12 ± 2         | 20         |
| <b>MS<sup>1</sup> Acquisition Rate</b>   |          |            |                |            |
| 2 Hz                                     | 283 ± 36 | 368        | 45 ± 11        | 73         |
| 4 Hz                                     | 292 ± 28 | 369        | 54 ± 12        | 74*        |
| 8 Hz                                     | 311 ± 54 | 347        | 42 ± 6         | 56         |
| 12 Hz                                    | 254 ± 41 | 348        | 37 ± 14        | 56         |

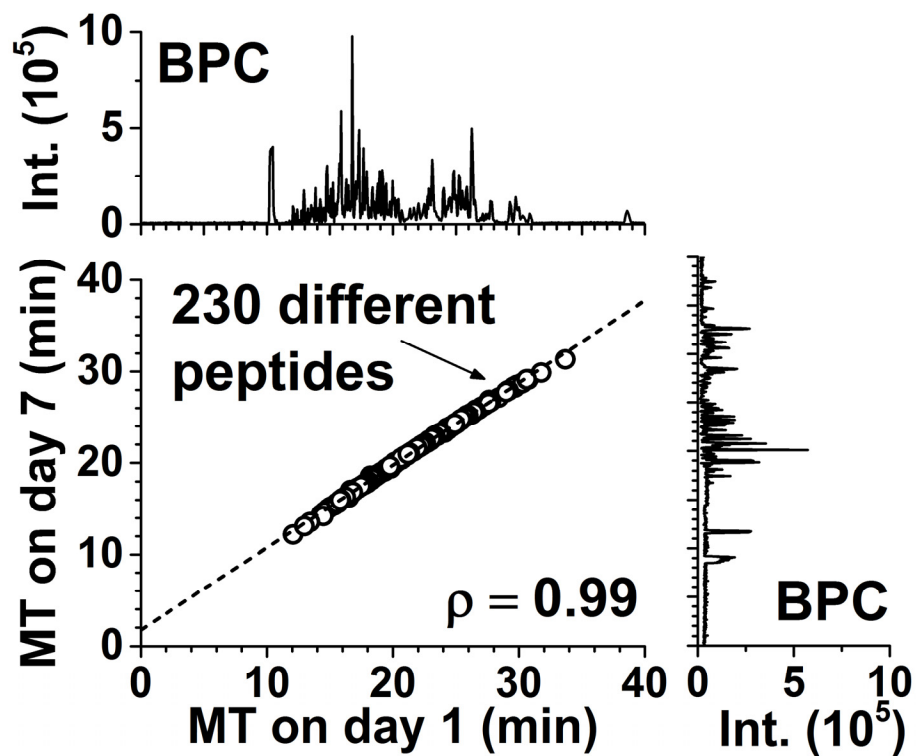

**Figure S1.** Robust separation of peptides in 20 ng protein digest from the 16-cell *Xenopus laevis* embryo. A high Pearson cross-correlation coefficient ( $\rho$ ) calculated for 230 randomly selected different peptides revealed reproducible migration times across 7 days of experiments.
