# Supplementary material
Source: PubMed Central journal article supplement (PMC4974349)
Supplement: 10.1074_M115.057760_mcp.M115.057760-3.pdf [file 10.1074_M115.057760_mcp.M115.057760-3.pdf]

Raw file 2015-01-08\_CL03\_Blastomere-15 Scan 22994 Method ITMS; HCD Score 49 m/z 467.26

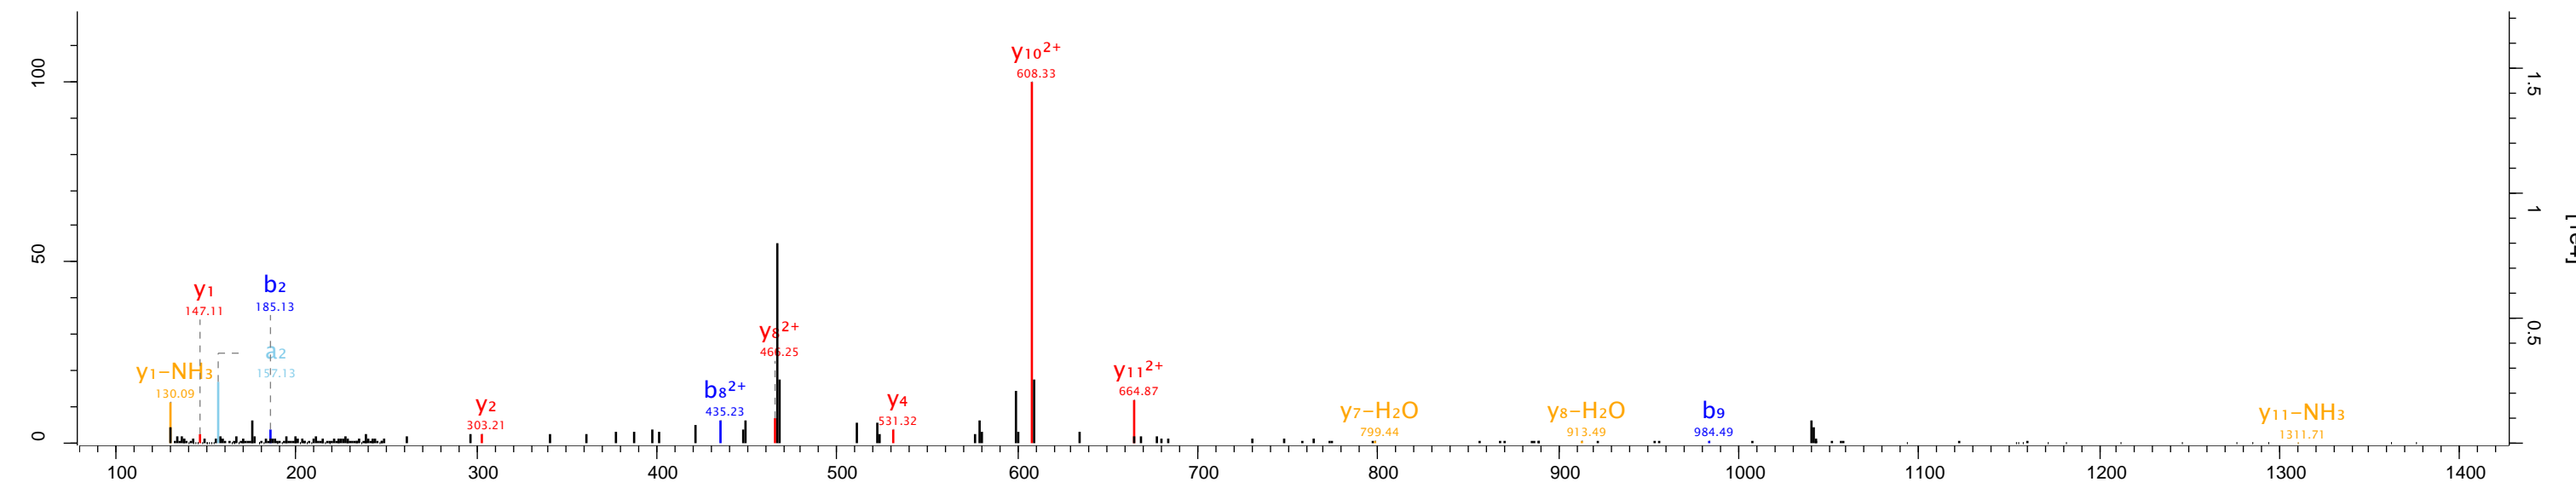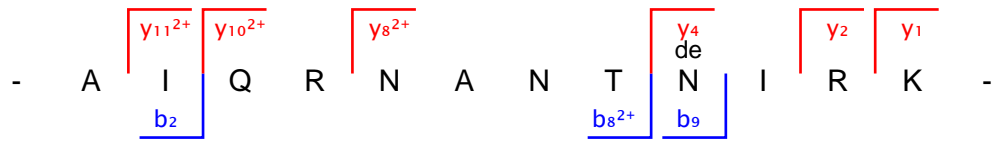

Spectral Annotation for Single-Peptide IDs between Single D11 Cells using Q-OT-LIT

Raw file 2015-01-08\_CL03\_Blastomere-15 Scan 24675 Method ITMS; HCD Score 68.85 m/z 467.79

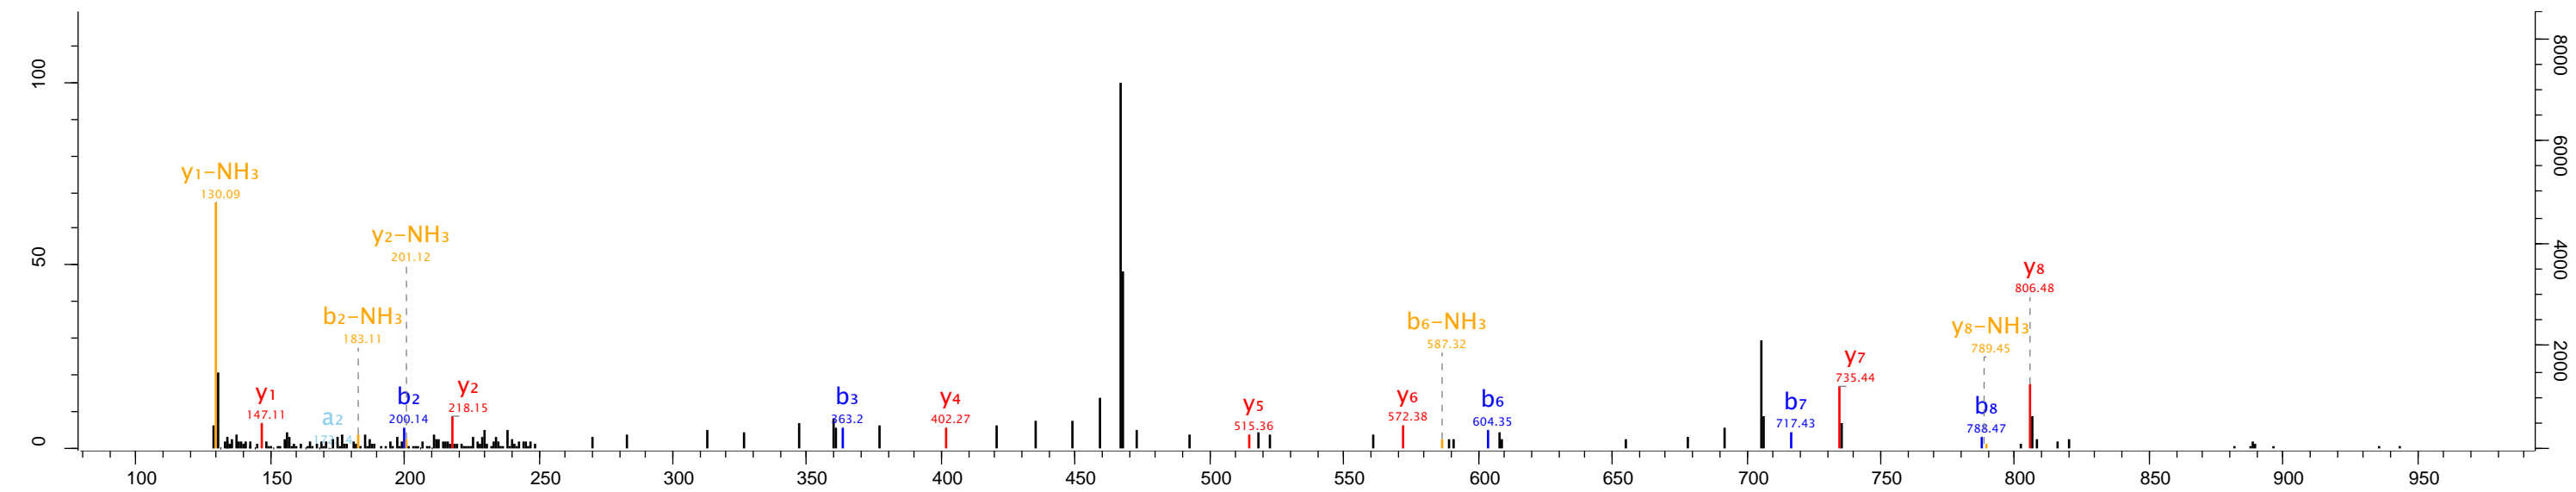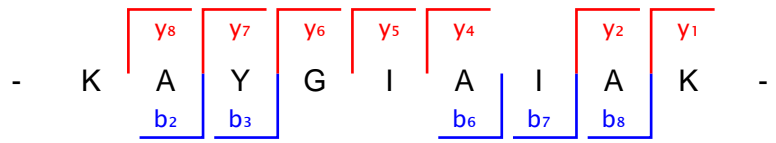

Raw file 2015-01-08\_CL03\_Blastomere-15 Scan 25602 Method ITMS; HCD Score 44.97 m/z 558.28

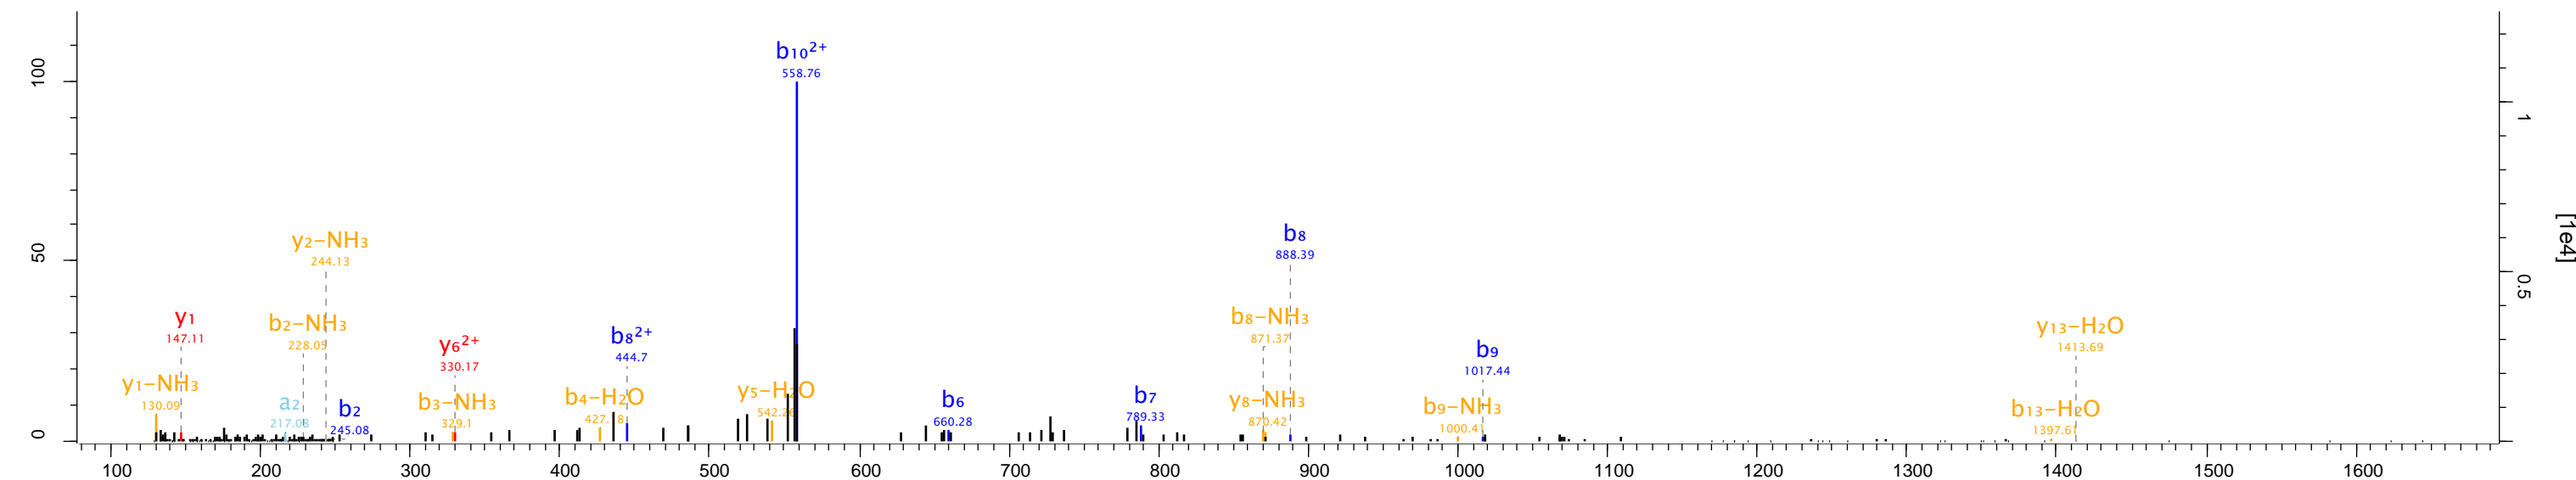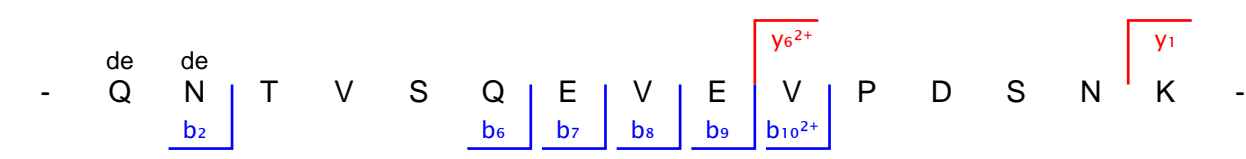

Raw file 2015-01-08\_CL03\_Blastomere-15  
 Scan 25734 Method ITMS; HCD Score 26.05 m/z 692.33

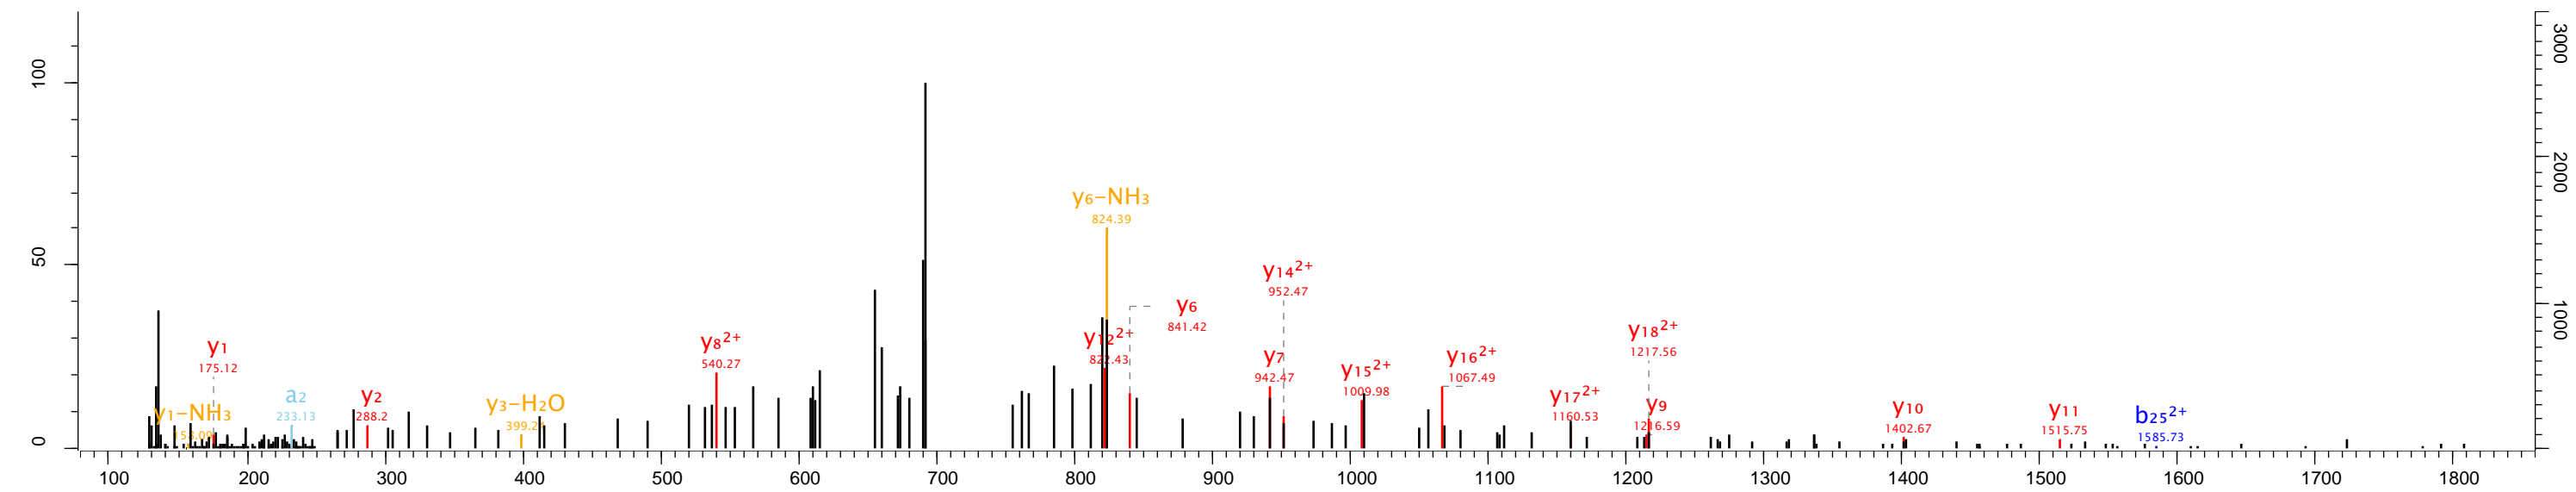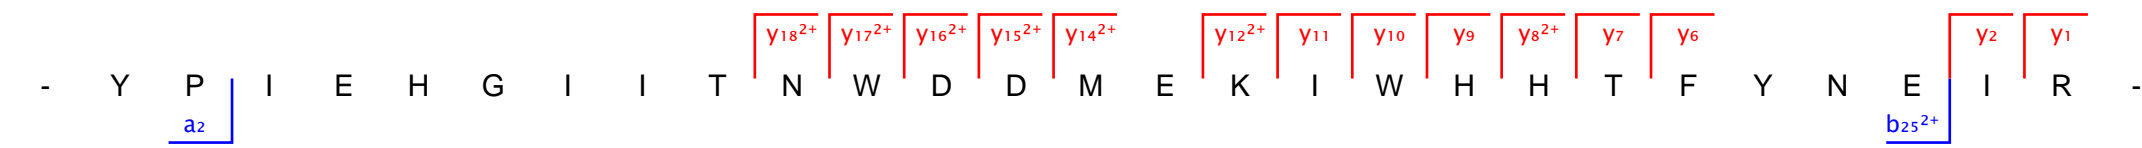

Raw file 2015-01-08\_CL03\_Blastomere-15 Scan 25772 Method ITMS; HCD Score 43.66 m/z 692.53

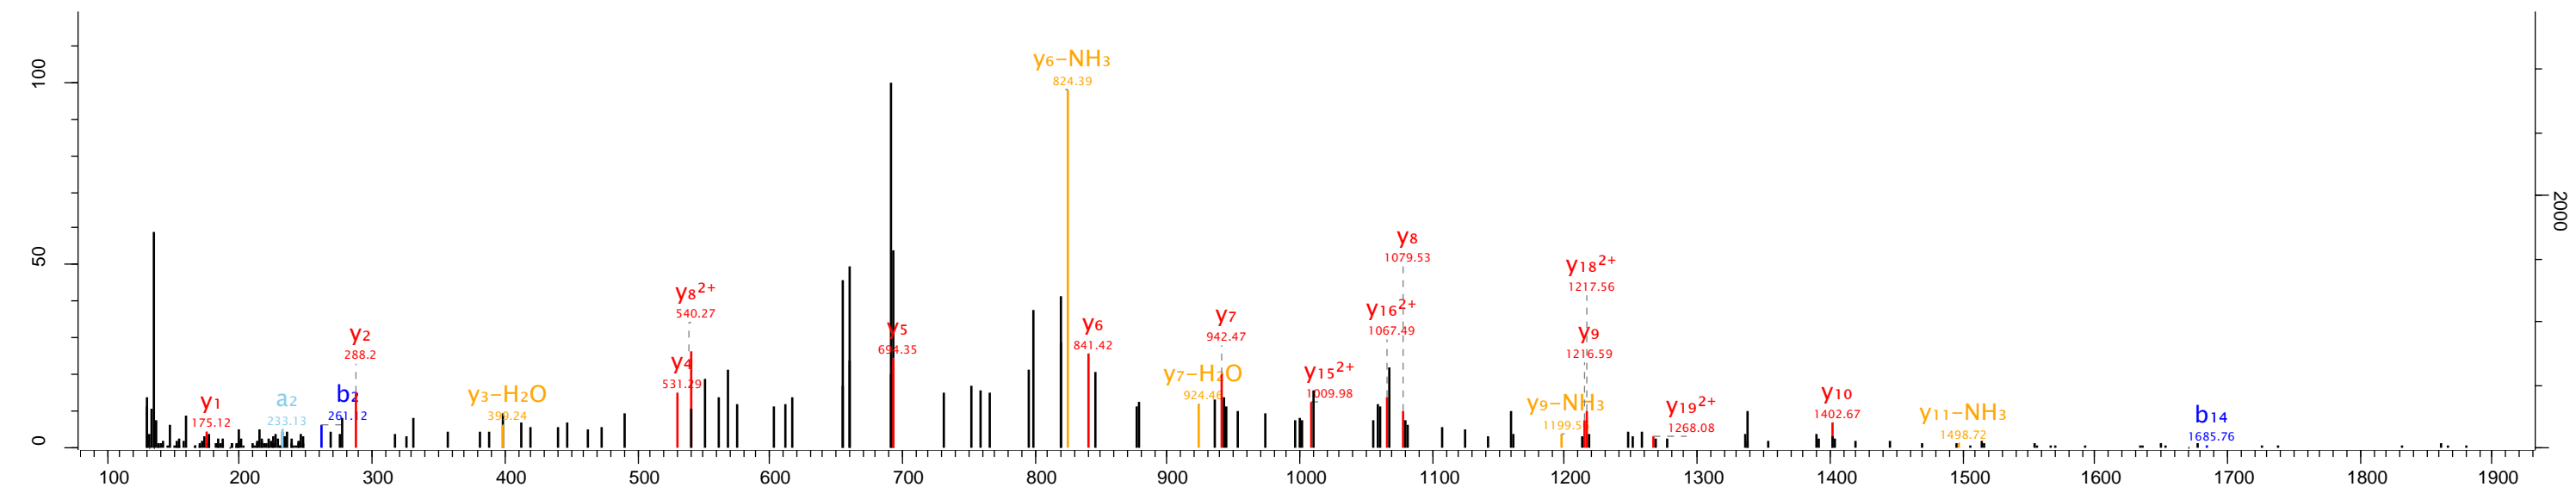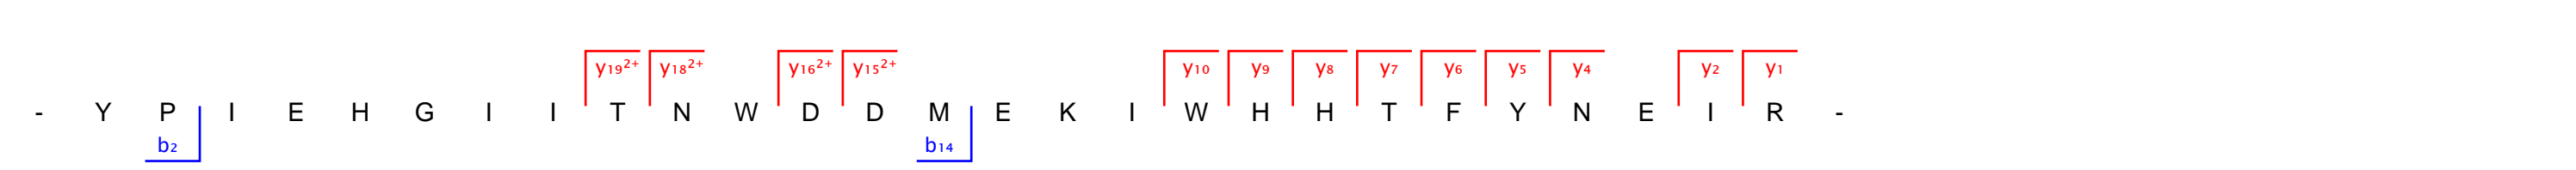

Spectral Annotation for Single-Peptide IDs between Single D11 Cells using Q-OT-LIT

Raw file: 2015-01-08\_CL03\_Blastomere-15  
 Scan: 25954 Method: ITMS; HCD Score: 68.4 m/z: 627.8

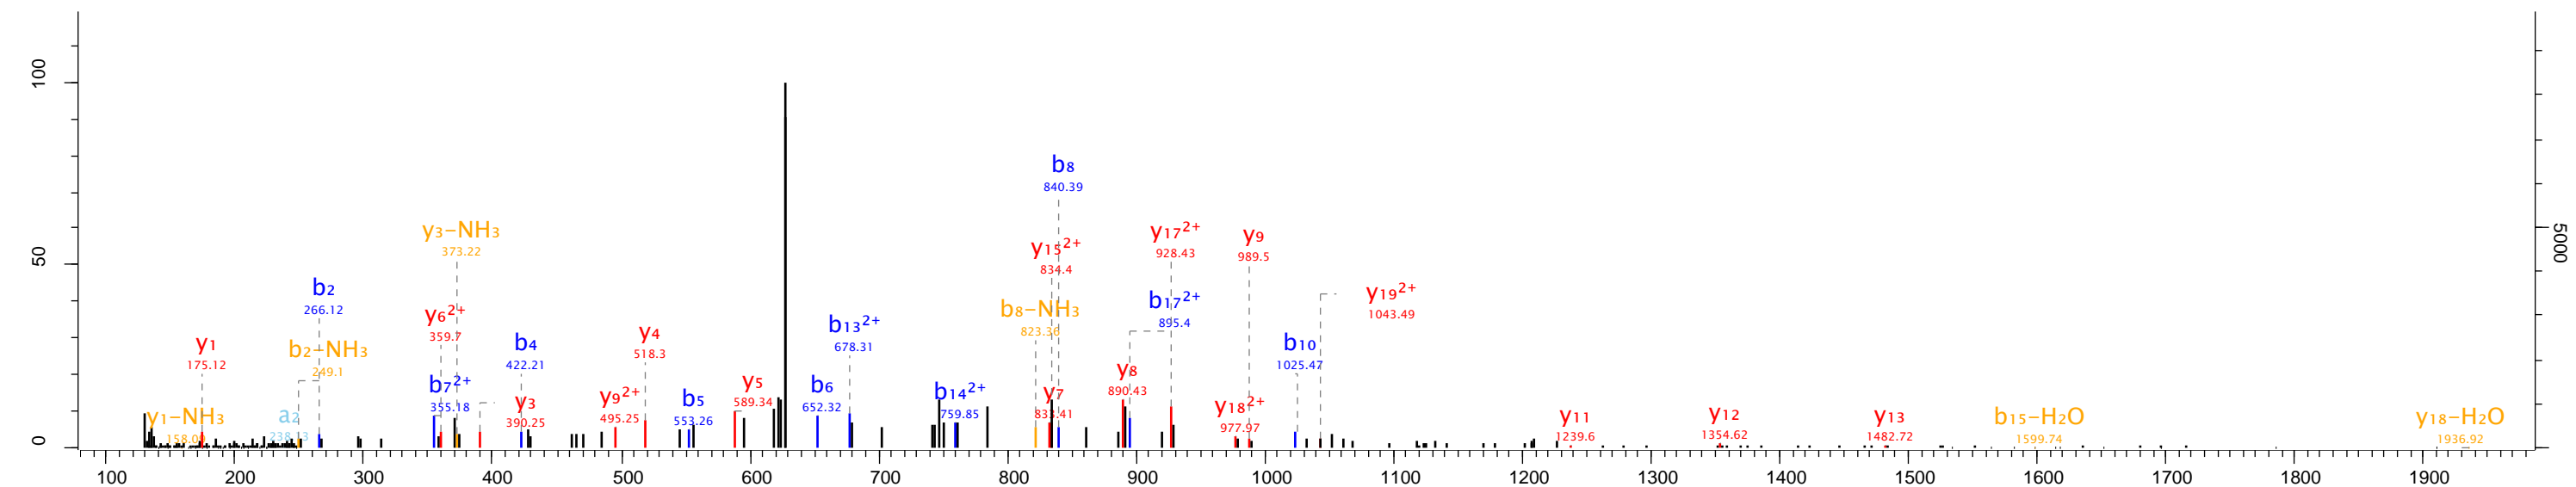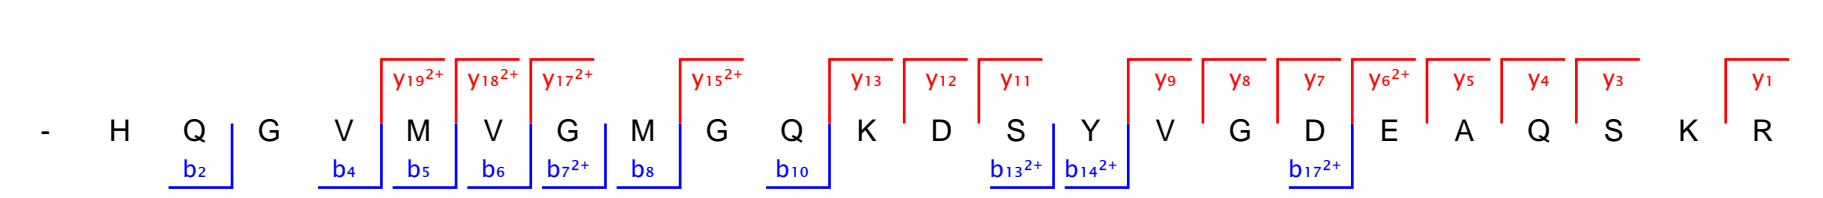

Spectral Annotation for Single-Peptide IDs between Single D11 Cells using Q-OT-LIT

Raw file: 2015-01-08\_CL03\_Blastomere-15  
 Scan: 25966 Method: ITMS; HCD Score: 85.4 m/z: 627.8

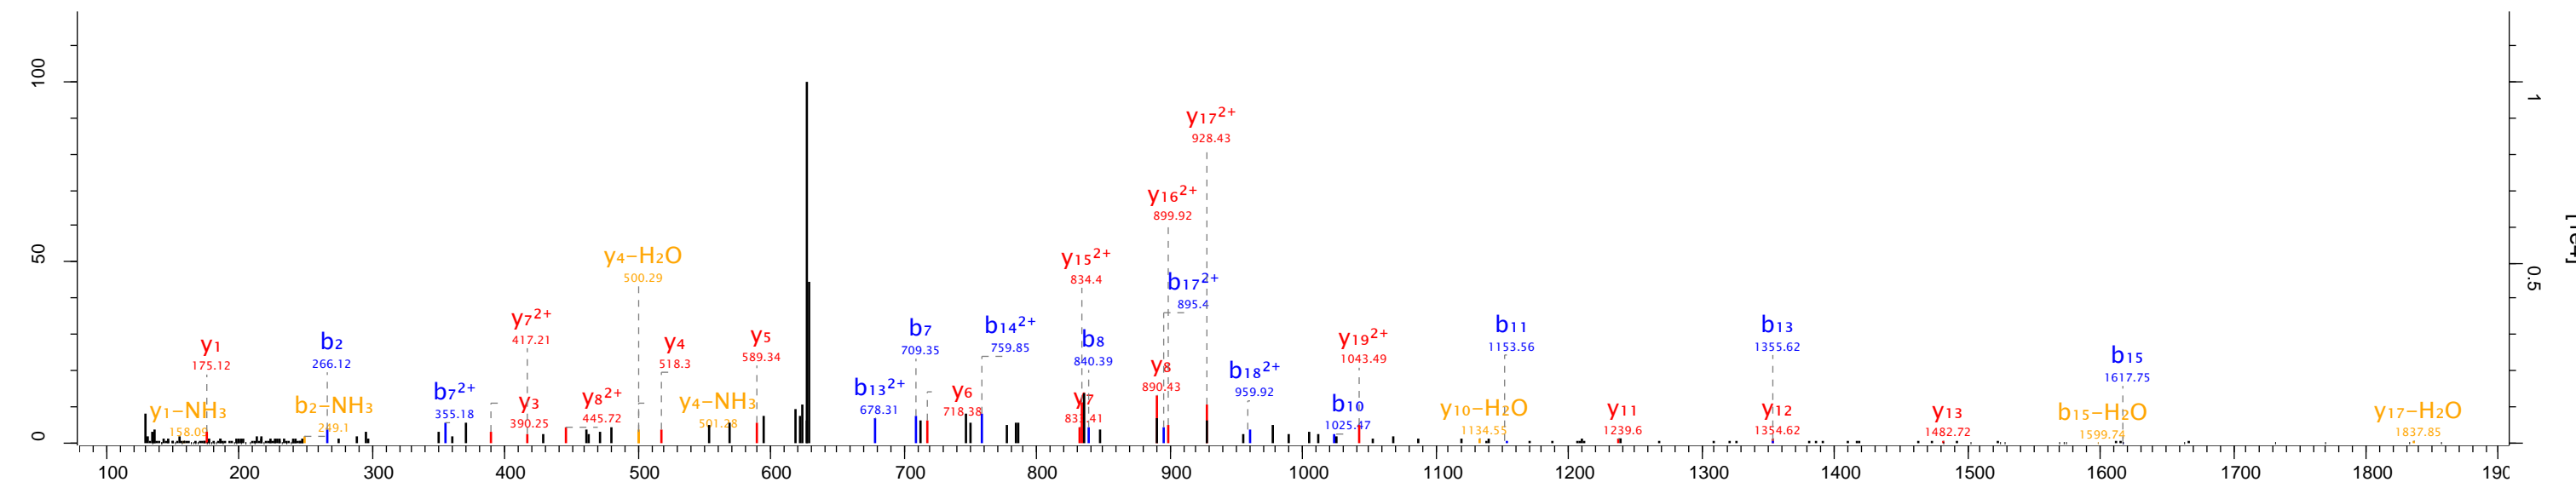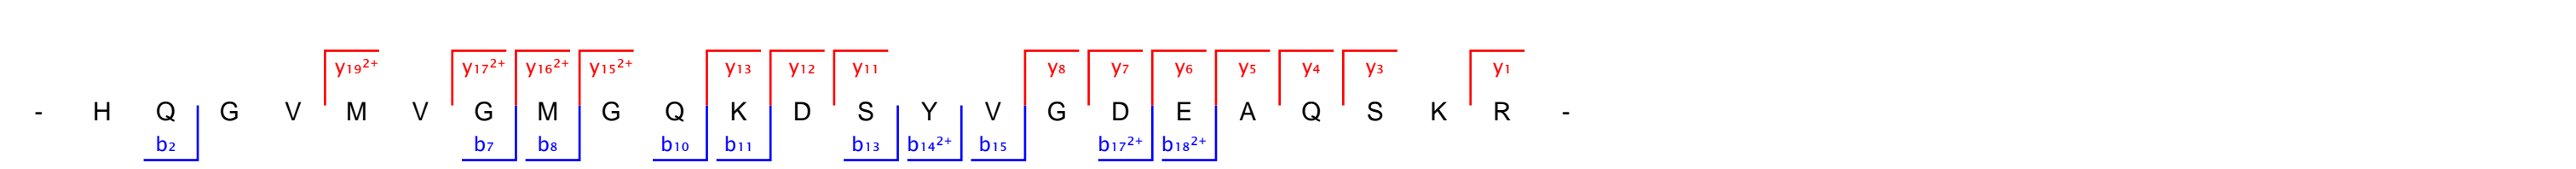

Spectral Annotation for Single-Peptide IDs between Single D11 Cells using Q-OT-LIT

Raw file 2015-01-08\_CL03\_Blastomere-15 Scan 25981 Method ITMS; HCD Score 107.39 m/z 627.8

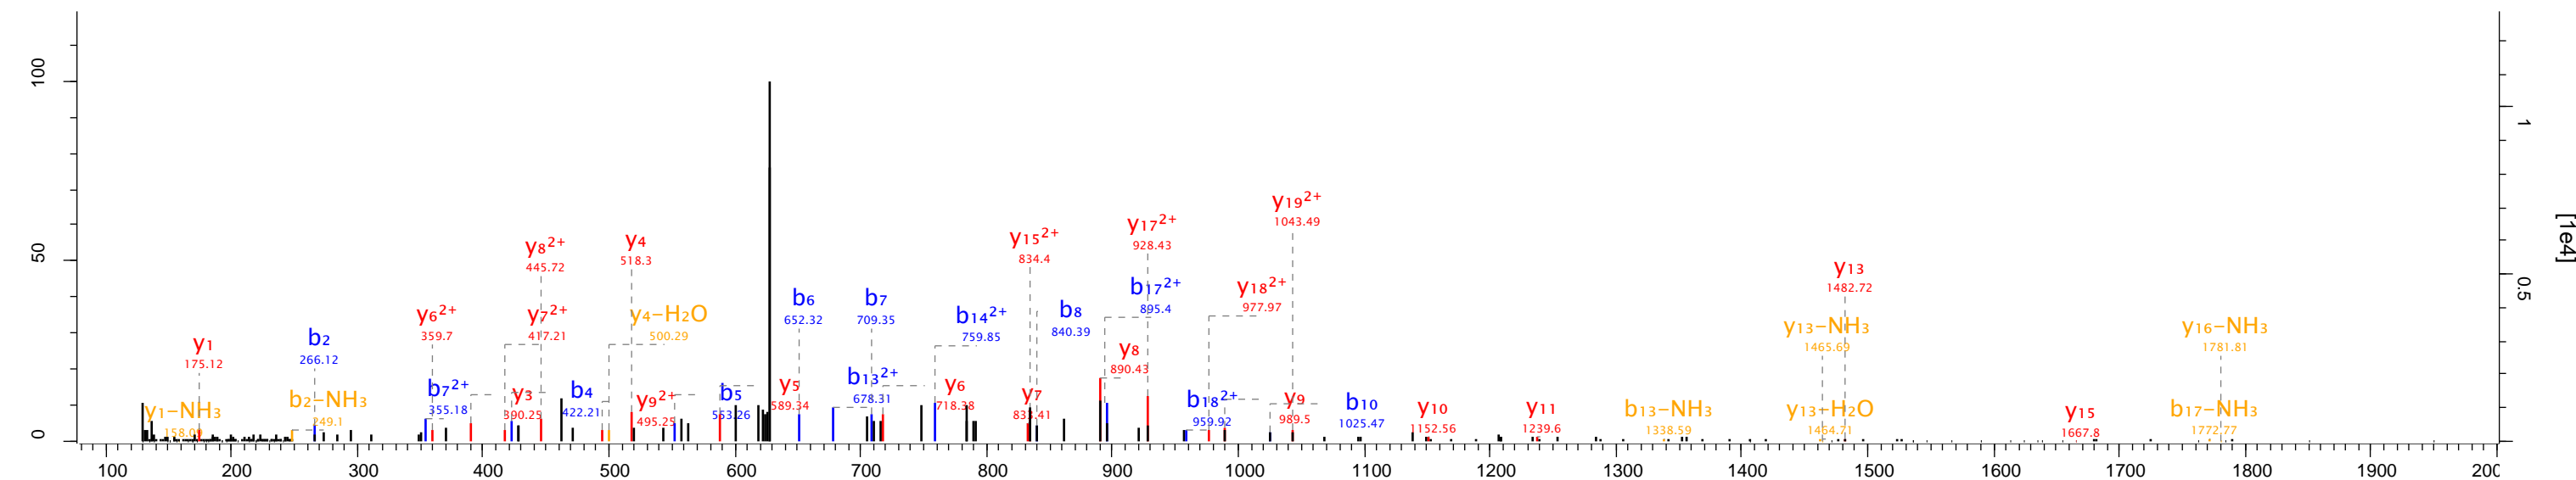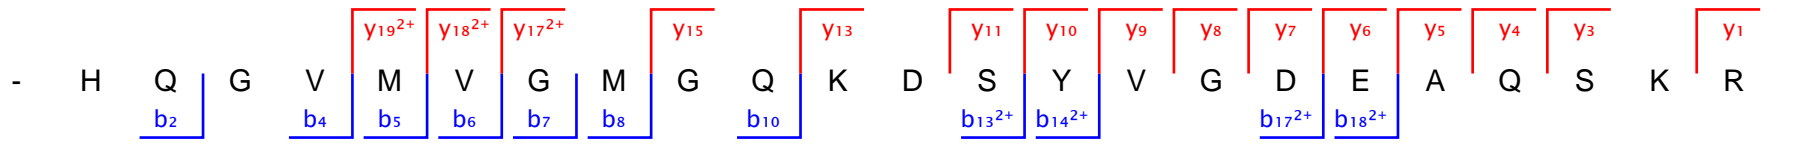

Spectral Annotation for Single-Peptide IDs between Single D11 Cells using Q-OT-LIT



Raw file 2015-01-08\_CL03\_Blastomere-15 Scan 25992 Method ITMS; HCD Score 42.39 m/z 474.49

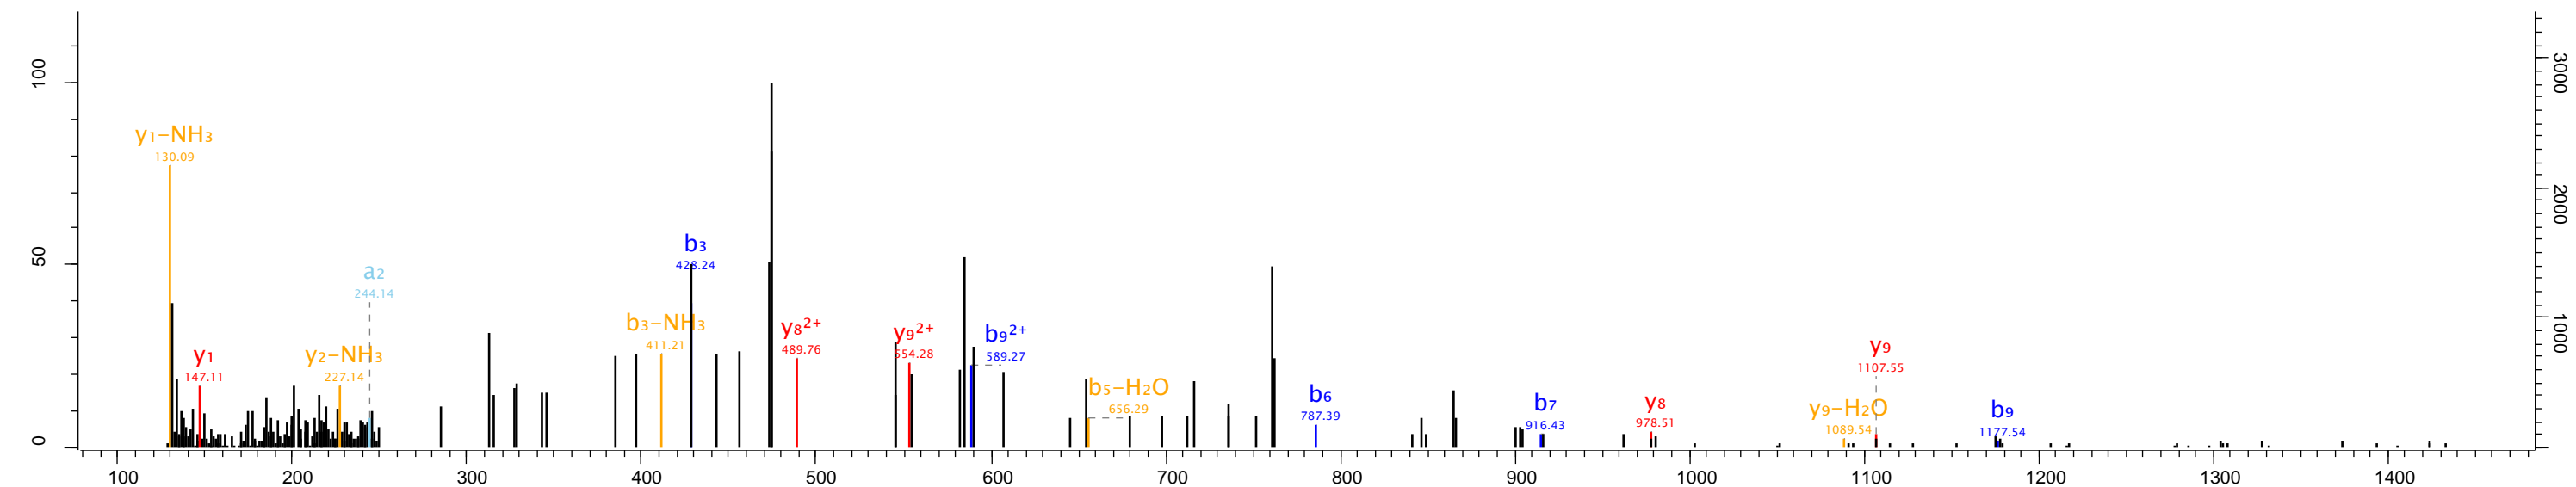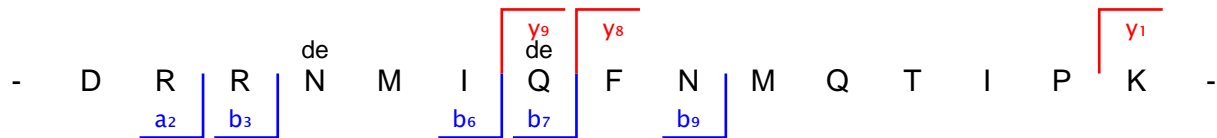

Spectral Annotation for Single-Peptide IDs between Single D11 Cells using Q-OT-LIT

Raw file 2015-01-08\_CL03\_Blastomere-15 Scan 26051 Method ITMS; HCD Score 44.16 m/z 865.92

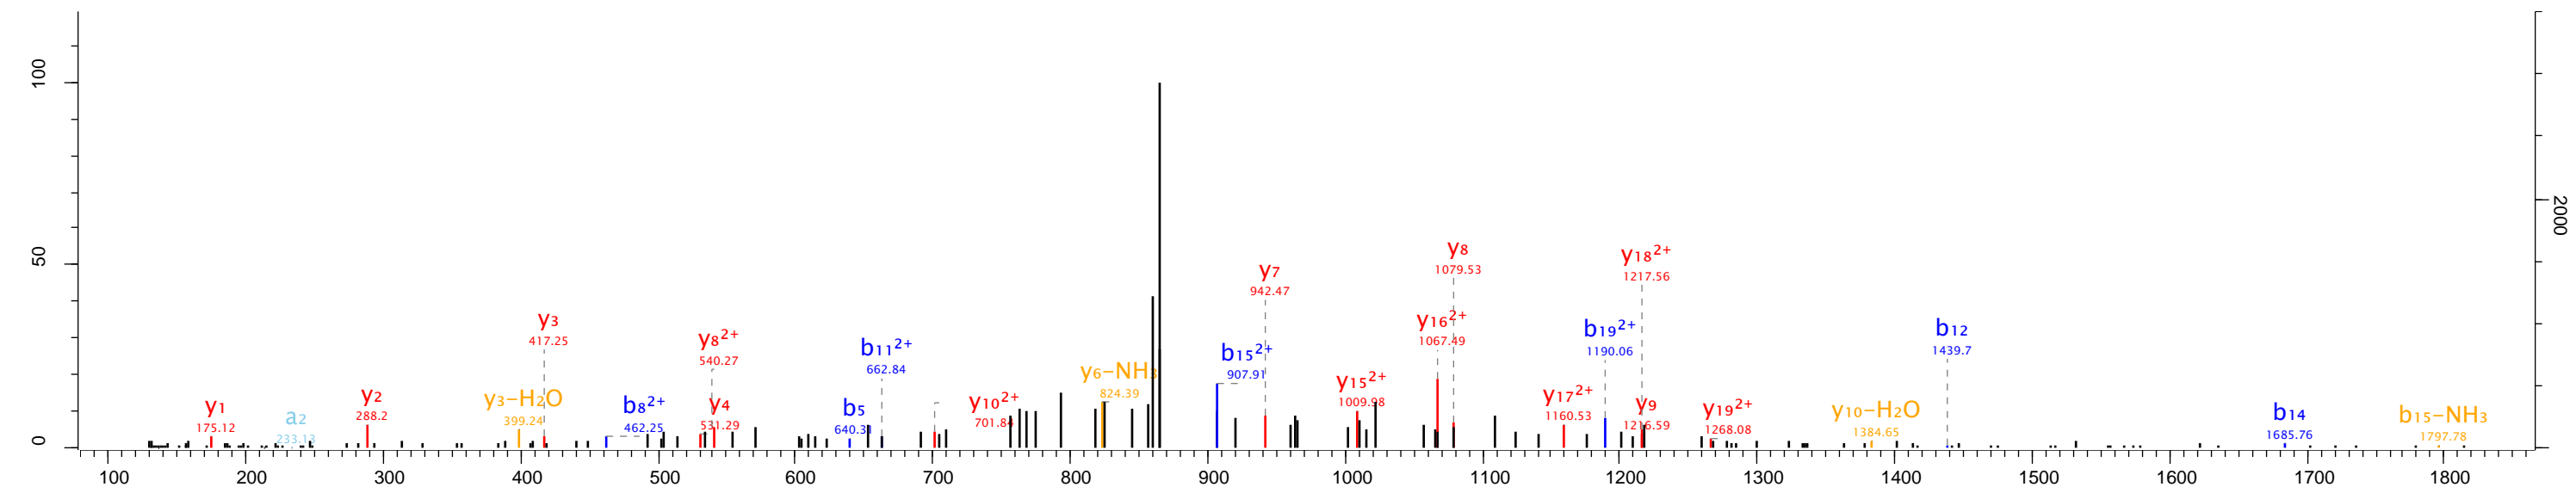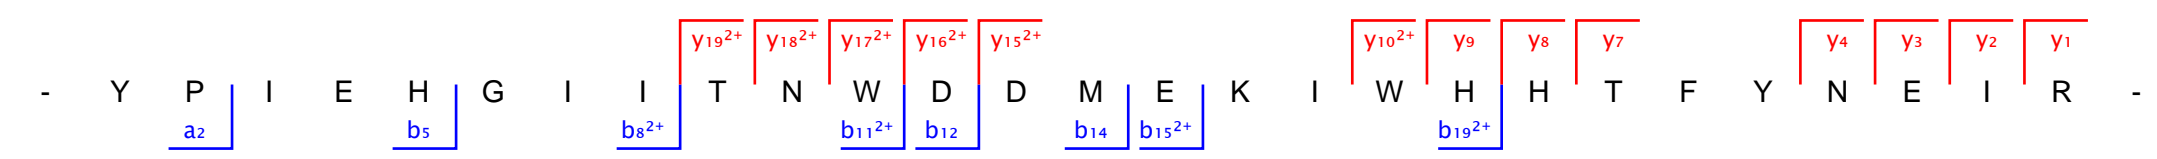

Spectral Annotation for Single-Peptide IDs between Single D11 Cells using Q-OT-LIT

Raw file 2015-01-08\_CL03\_Blastomere-15 Scan 26184 Method ITMS; HCD Score 23.49 m/z 599.11

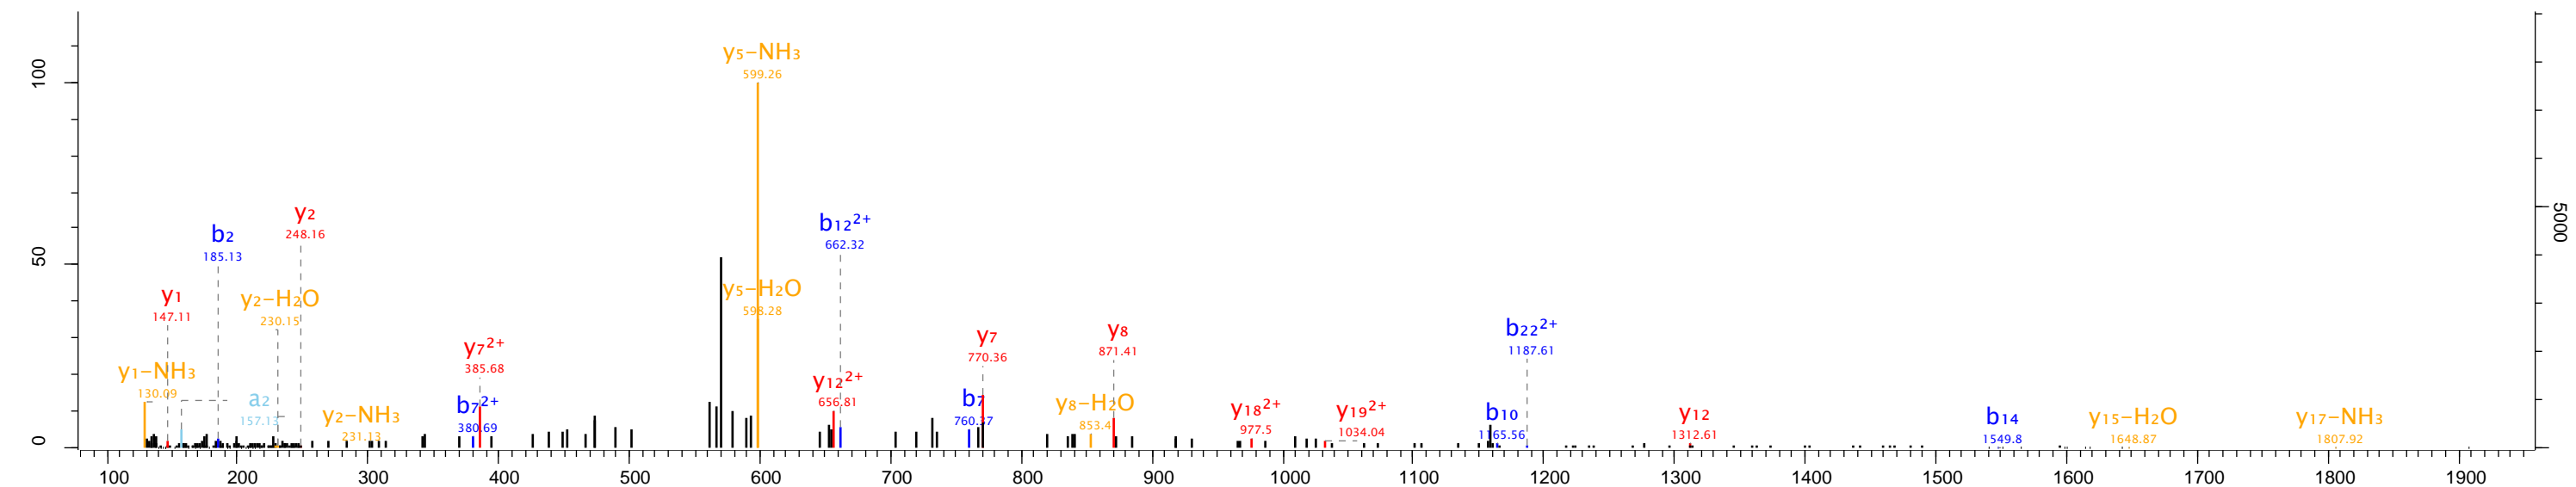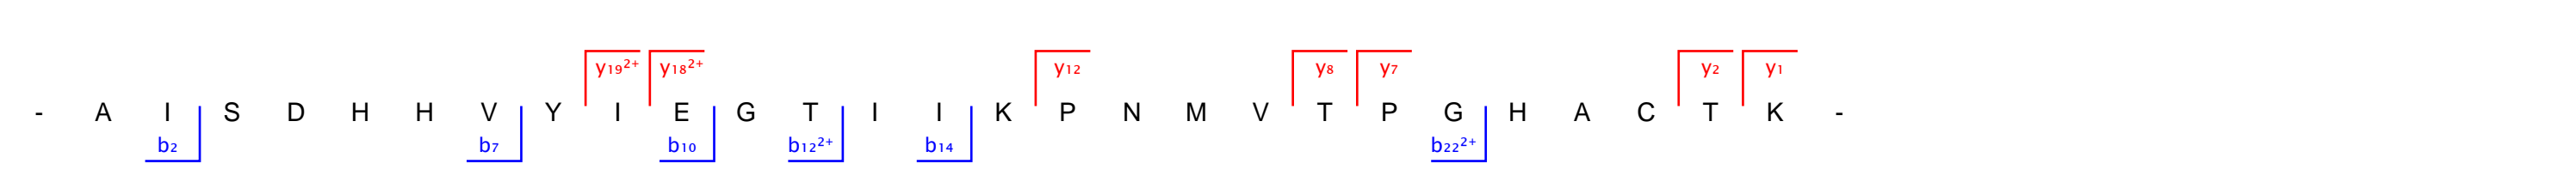

Spectral Annotation for Single-Peptide IDs between Single D11 Cells using Q-OT-LIT

Raw file 2015-01-08\_CL03\_Blastomere-15 Scan 26207 Method ITMS; HCD Score 99.28 m/z 572.8

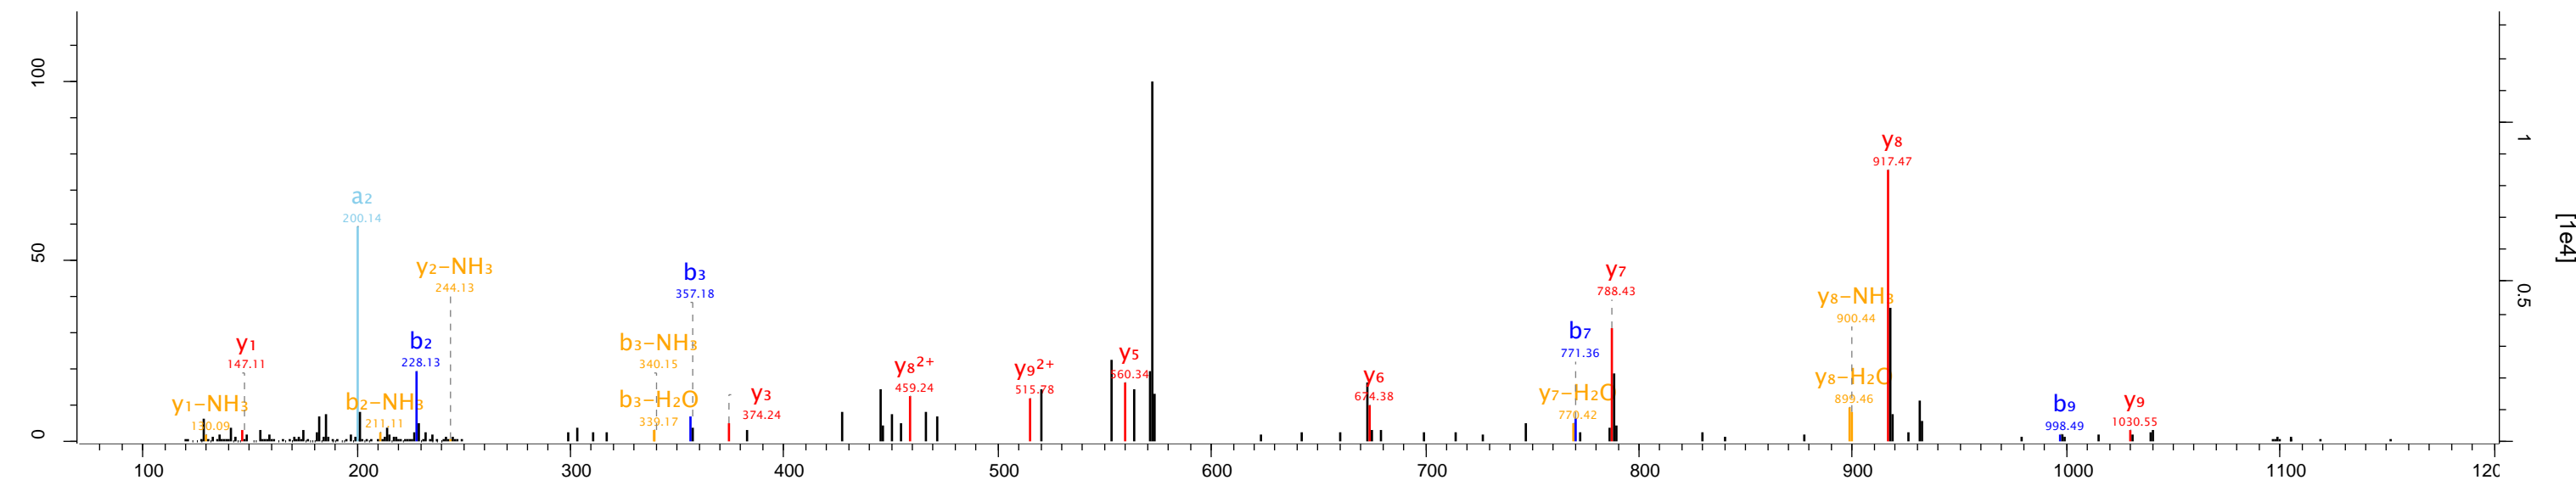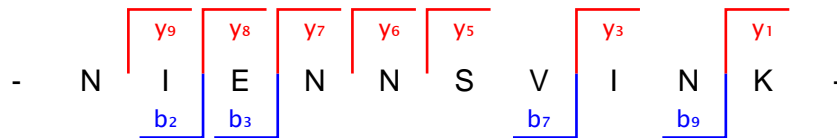

Spectral Annotation for Single-Peptide IDs between Single D11 Cells using Q-OT-LIT

Raw file 2015-01-08\_CL03\_Blastomere-15 Scan 26213 Method ITMS; HCD Score 78.34 m/z 572.8

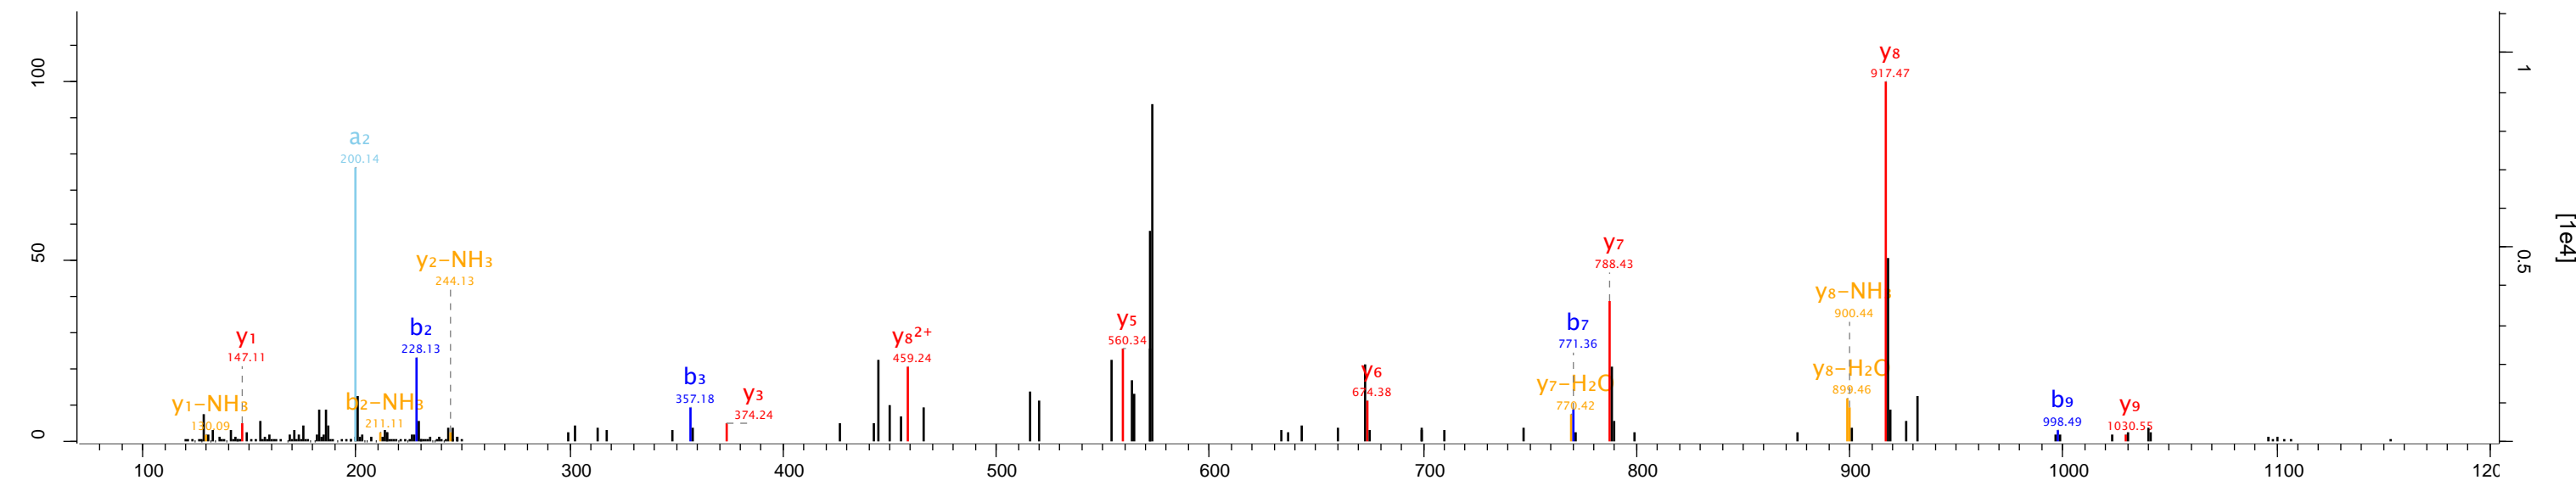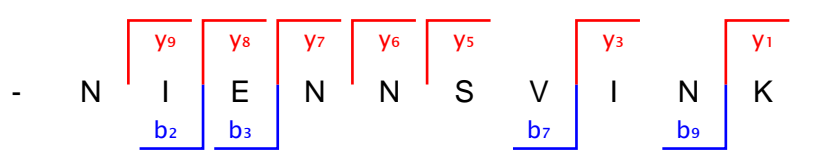

Spectral Annotation for Single-Peptide IDs between Single D11 Cells using Q-OT-LIT

Raw file 2015-01-08\_CL03\_Blastomere-15 Scan 26224 Method ITMS; HCD Score 82.03 m/z 382.2

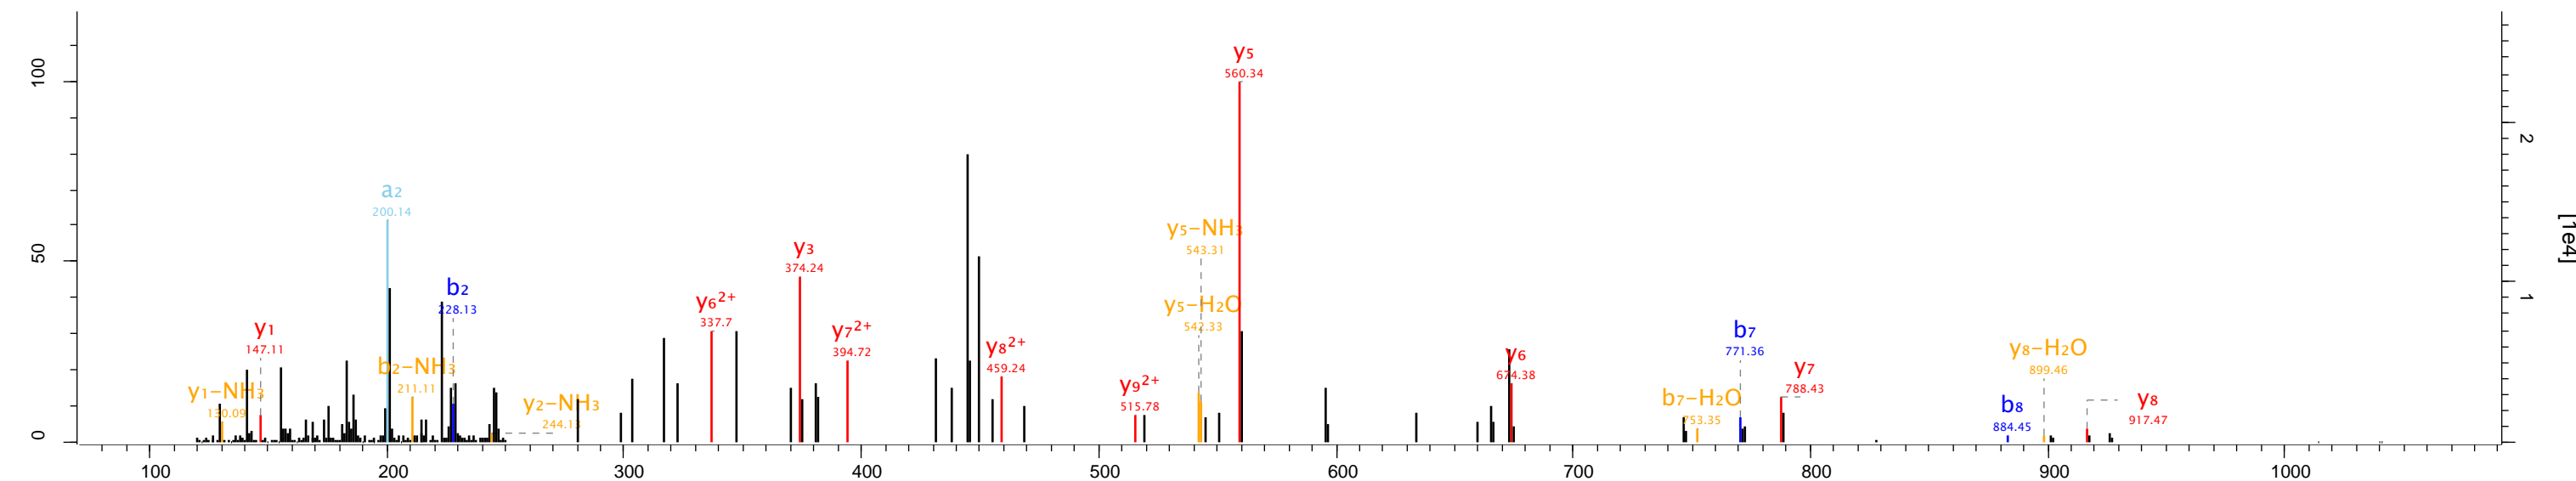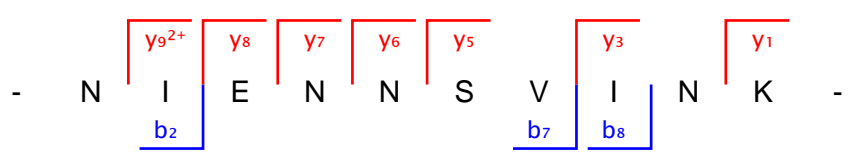

Spectral Annotation for Single-Peptide IDs between Single D11 Cells using Q-OT-LIT

Raw file 2015-01-08\_CL03\_Blastomere-15 Scan 26362 Method ITMS; HCD Score 45.87 m/z 606.31

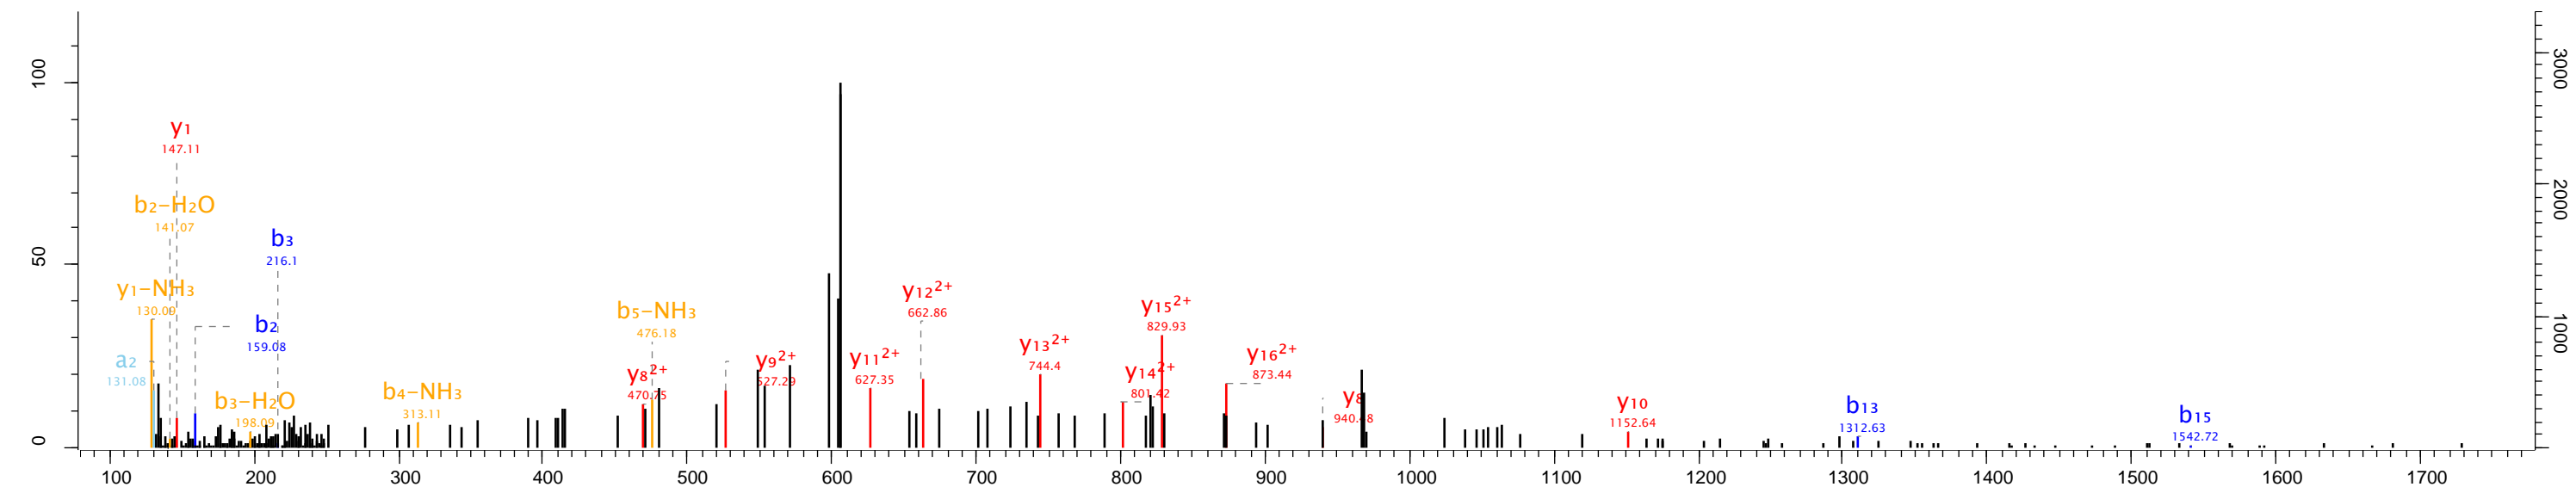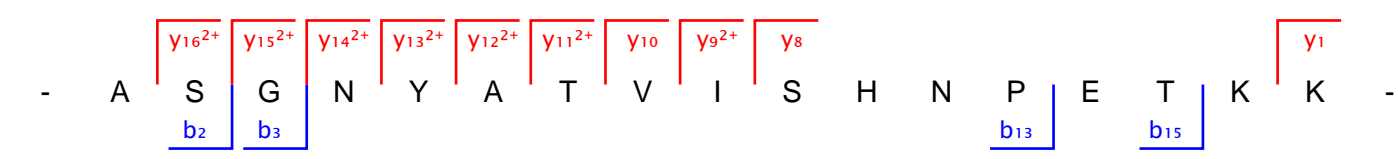

Spectral Annotation for Single-Peptide IDs between Single D11 Cells using Q-OT-LIT

Raw file 2015-01-08\_CL03\_Blastomere-15 Scan 26550 Method ITMS; HCD Score 78.34 m/z 586.29

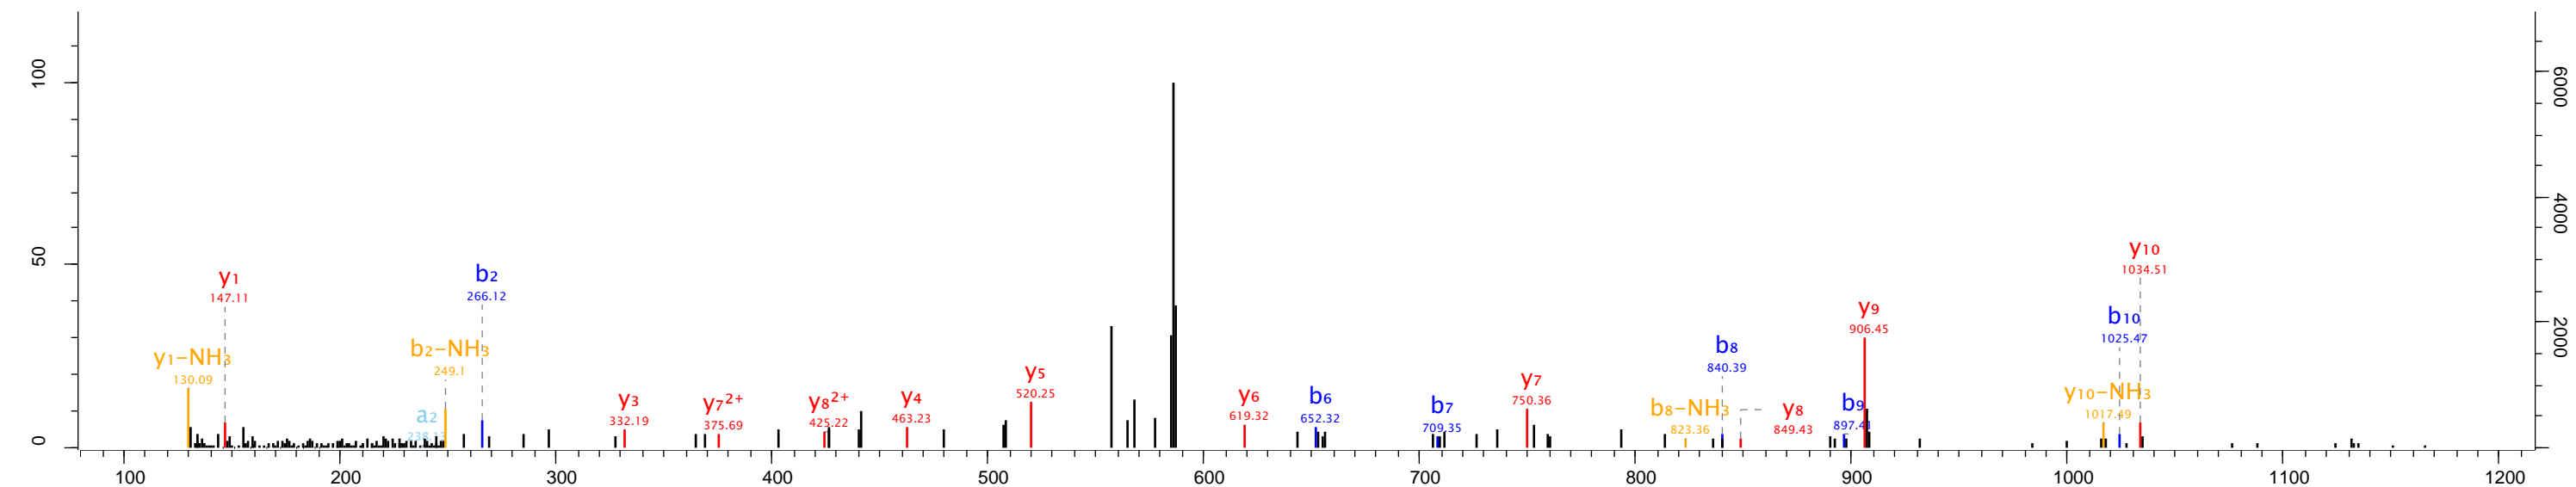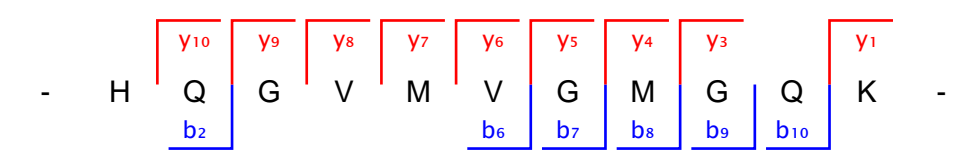



Raw file 2015-01-08\_CL03\_Blastomere-15 Scan 26569 Method ITMS; HCD Score 77.74 m/z 586.29

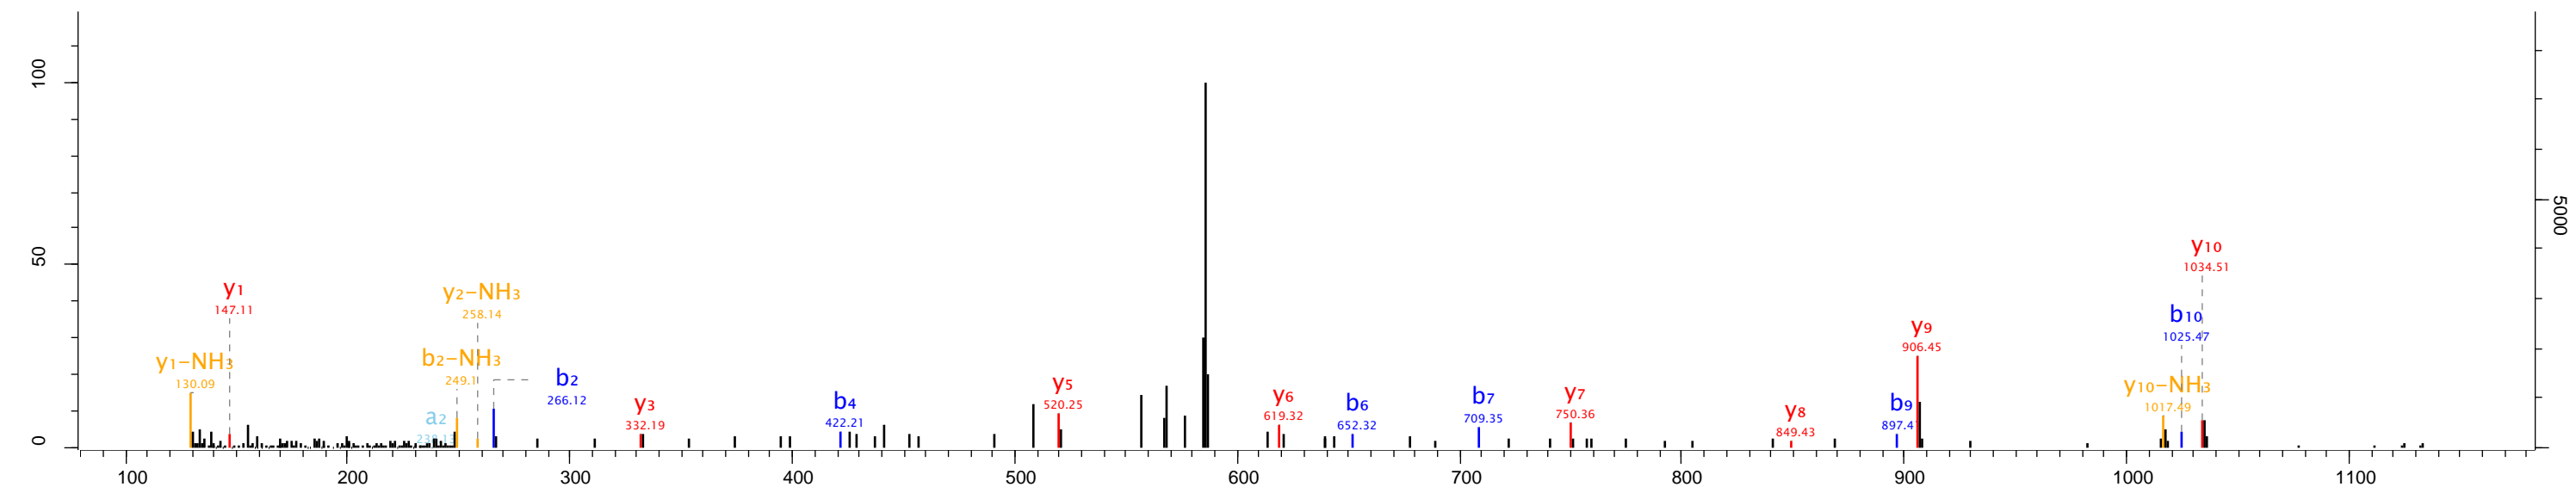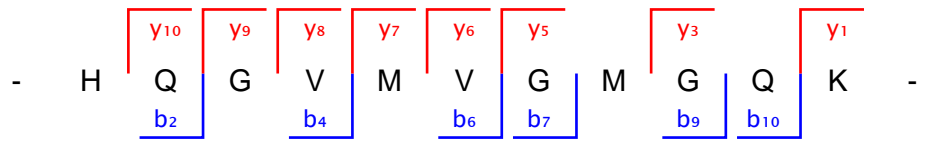

Spectral Annotation for Single-Peptide IDs between Single D11 Cells using Q-OT-LIT

Raw file 2015-01-08\_CL03\_Blastomere-15 Scan 26582 Method ITMS; HCD Score 132.25 m/z 586.29

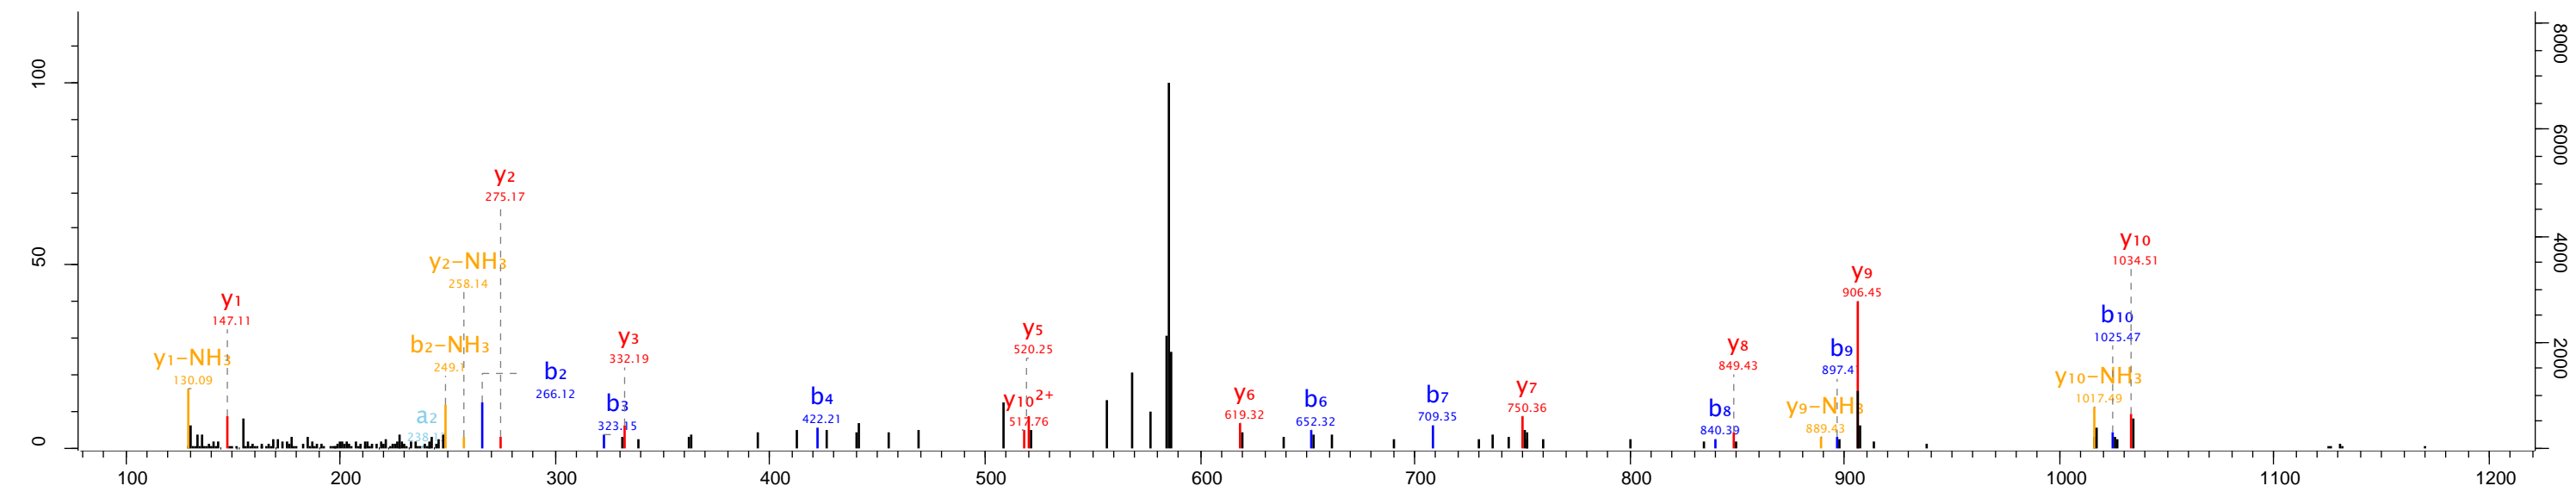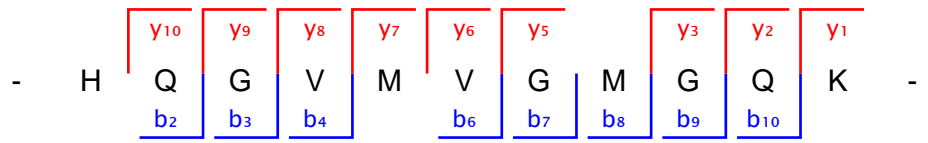

Raw file 2015-01-08\_CL03\_Blastomere-15 Scan 26587 Method ITMS; HCD Score 114.89 m/z 572.8

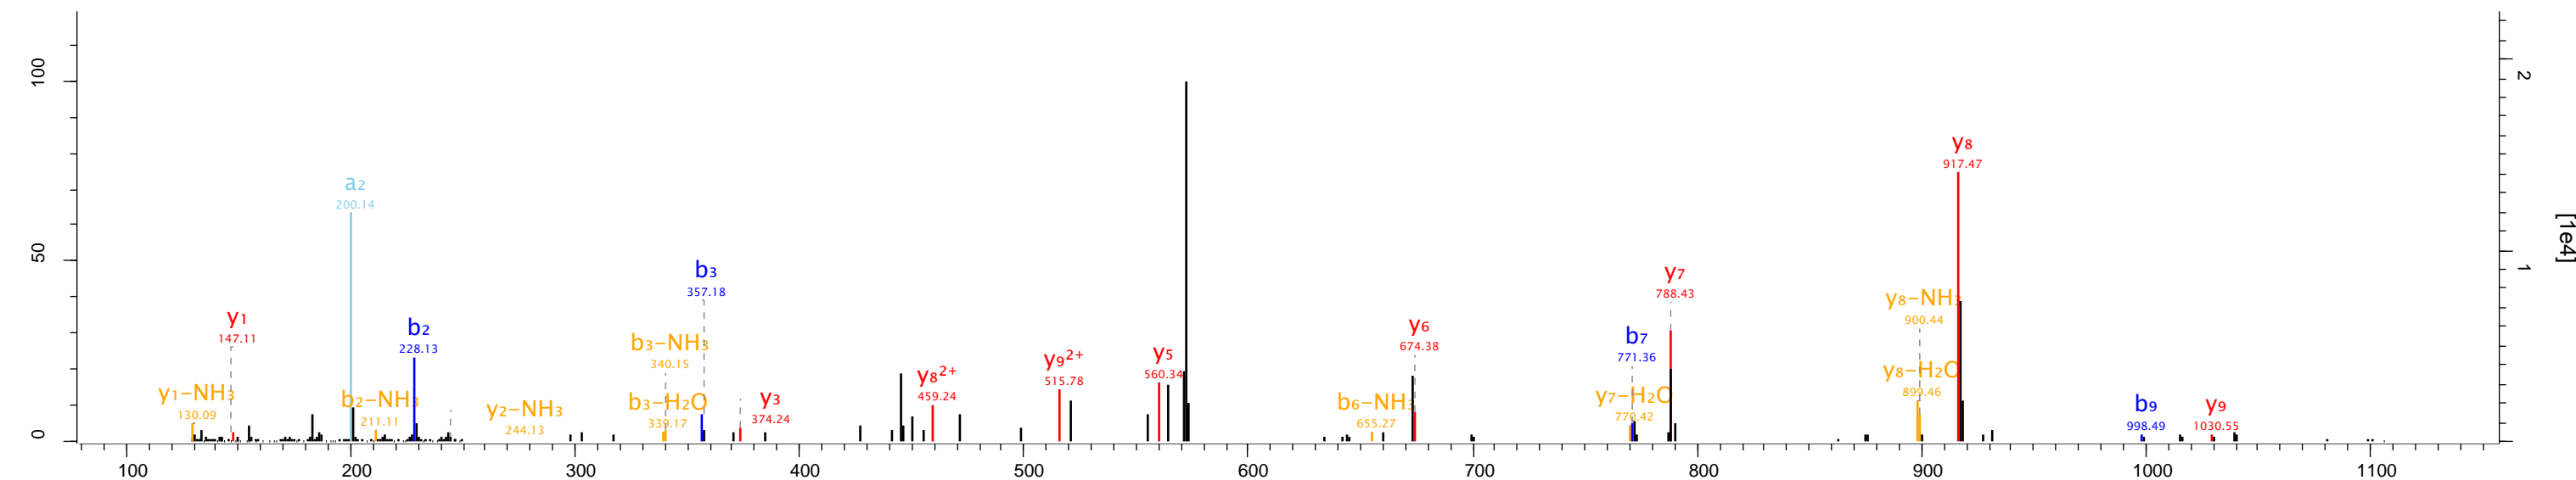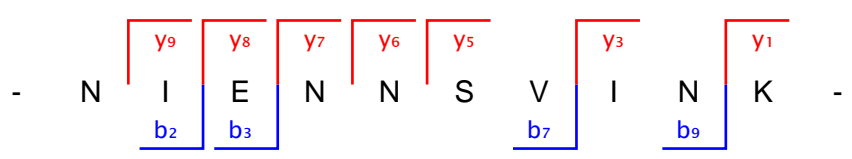

Spectral Annotation for Single-Peptide IDs between Single D11 Cells using Q-OT-LIT

Raw file 2015-01-08\_CL03\_Blastomere-15 Scan 26588 Method ITMS; HCD Score 92.24 m/z 382.2

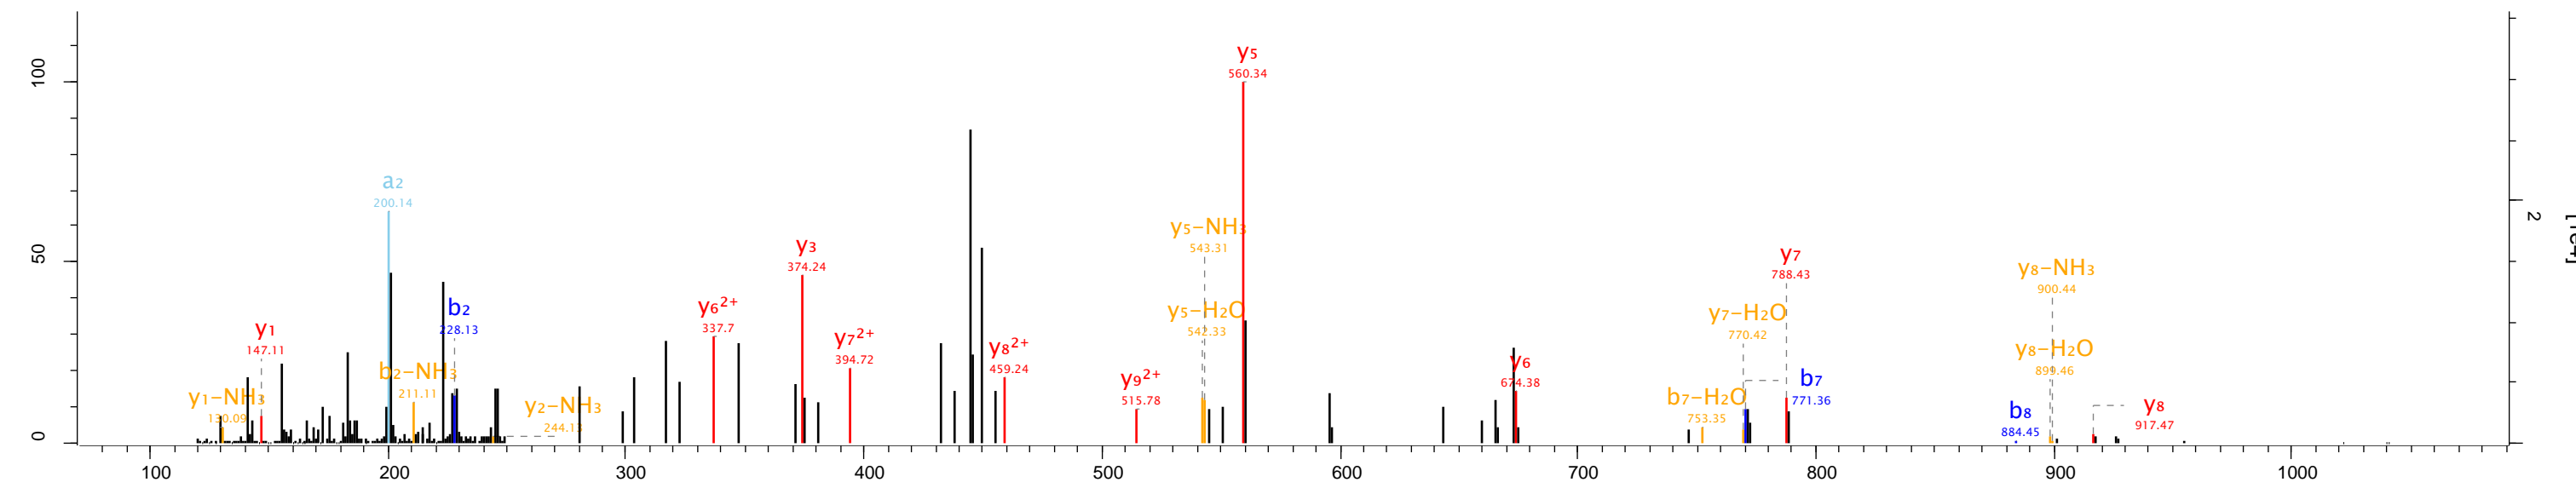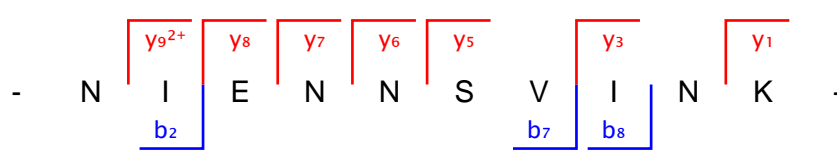

Spectral Annotation for Single-Peptide IDs between Single D11 Cells using Q-OT-LIT

Raw file 2015-01-08\_CL03\_Blastomere-15 Scan 26602 Method ITMS; HCD Score 112.83 m/z 586.29

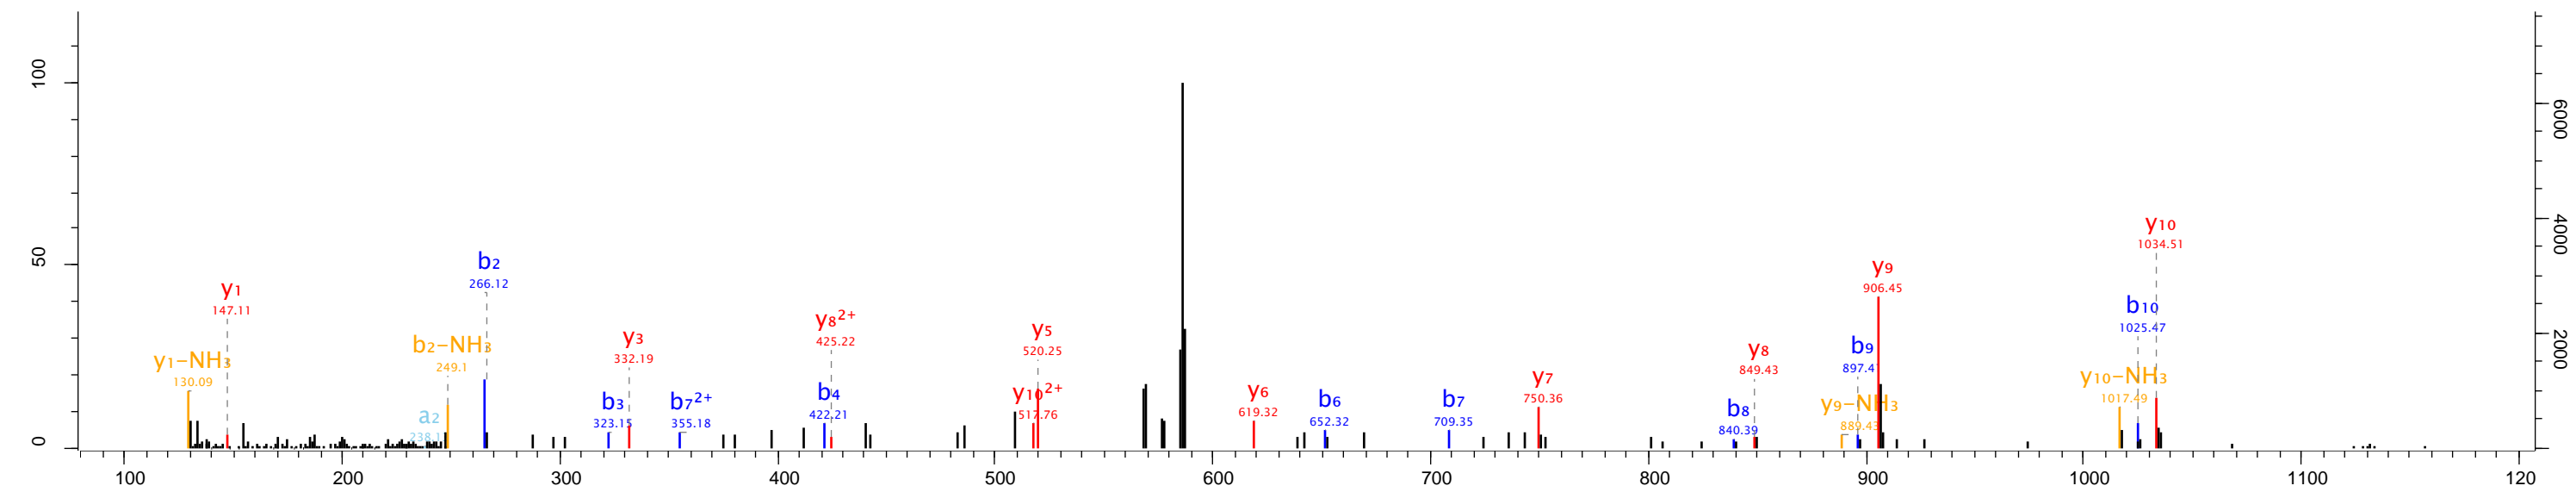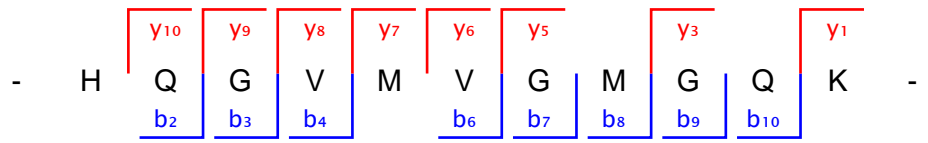

Raw file 2015-01-08\_CL03\_Blastomere-15 Scan 26607 Method ITMS; HCD Score 97.6 m/z 382.2

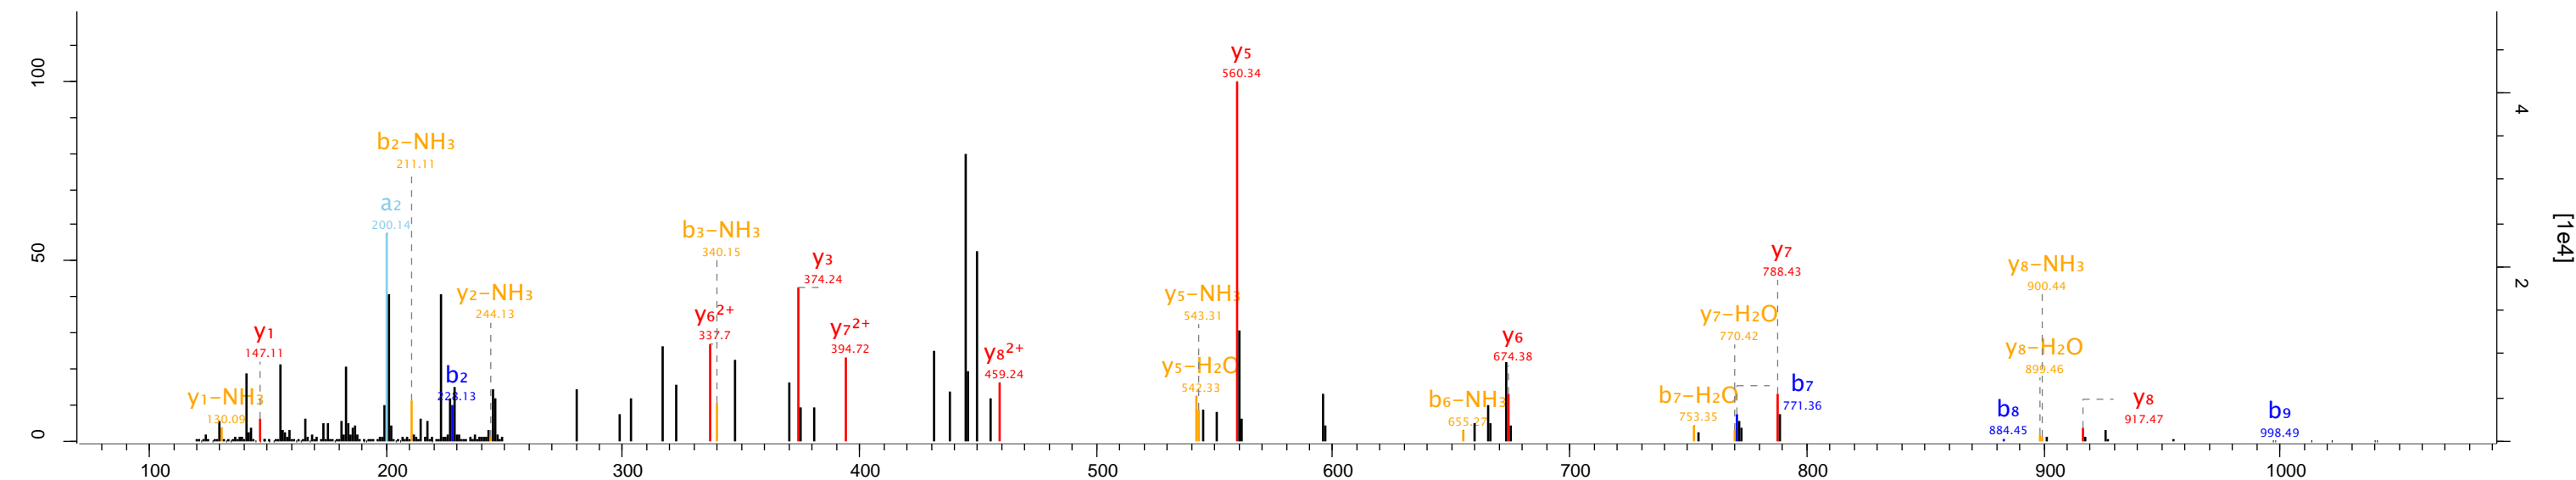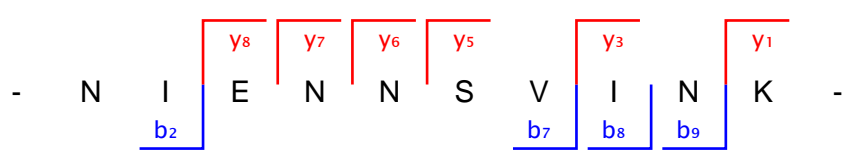

Spectral Annotation for Single-Peptide IDs between Single D11 Cells using Q-OT-LIT

Raw file 2015-01-08\_CL03\_Blastomere-15 Scan 26621 Method ITMS; HCD Score 107.55 m/z 382.2

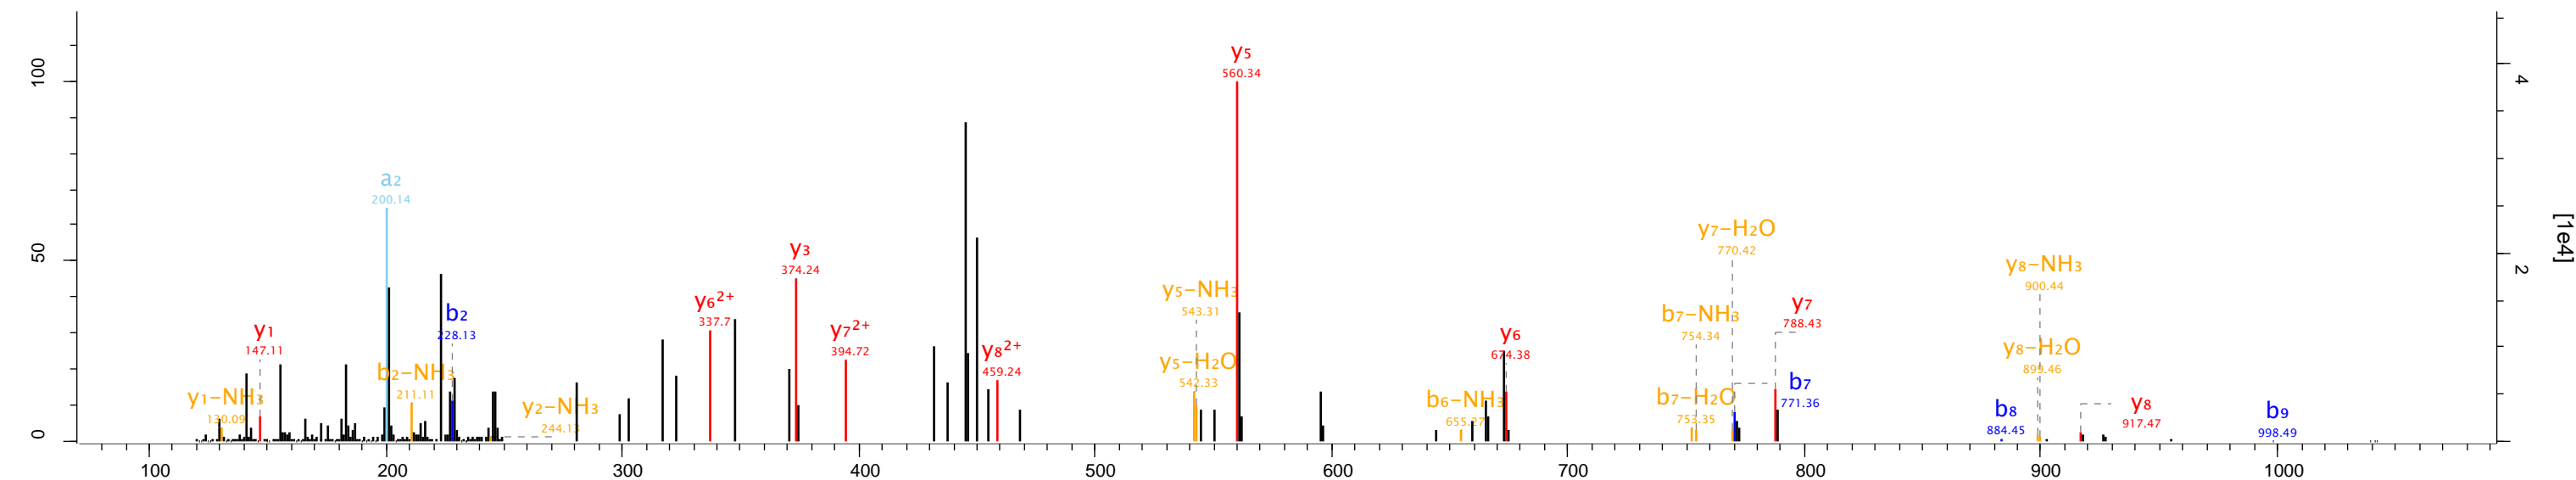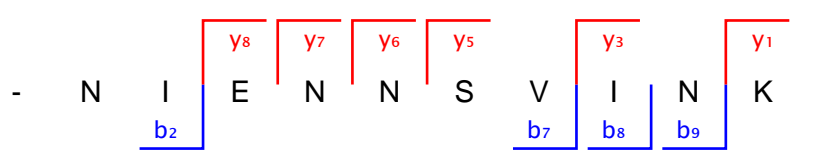

Raw file 2015-01-08\_CL03\_Blastomere-15 Scan 26895 Method ITMS; HCD Score 51.69 m/z 712.6

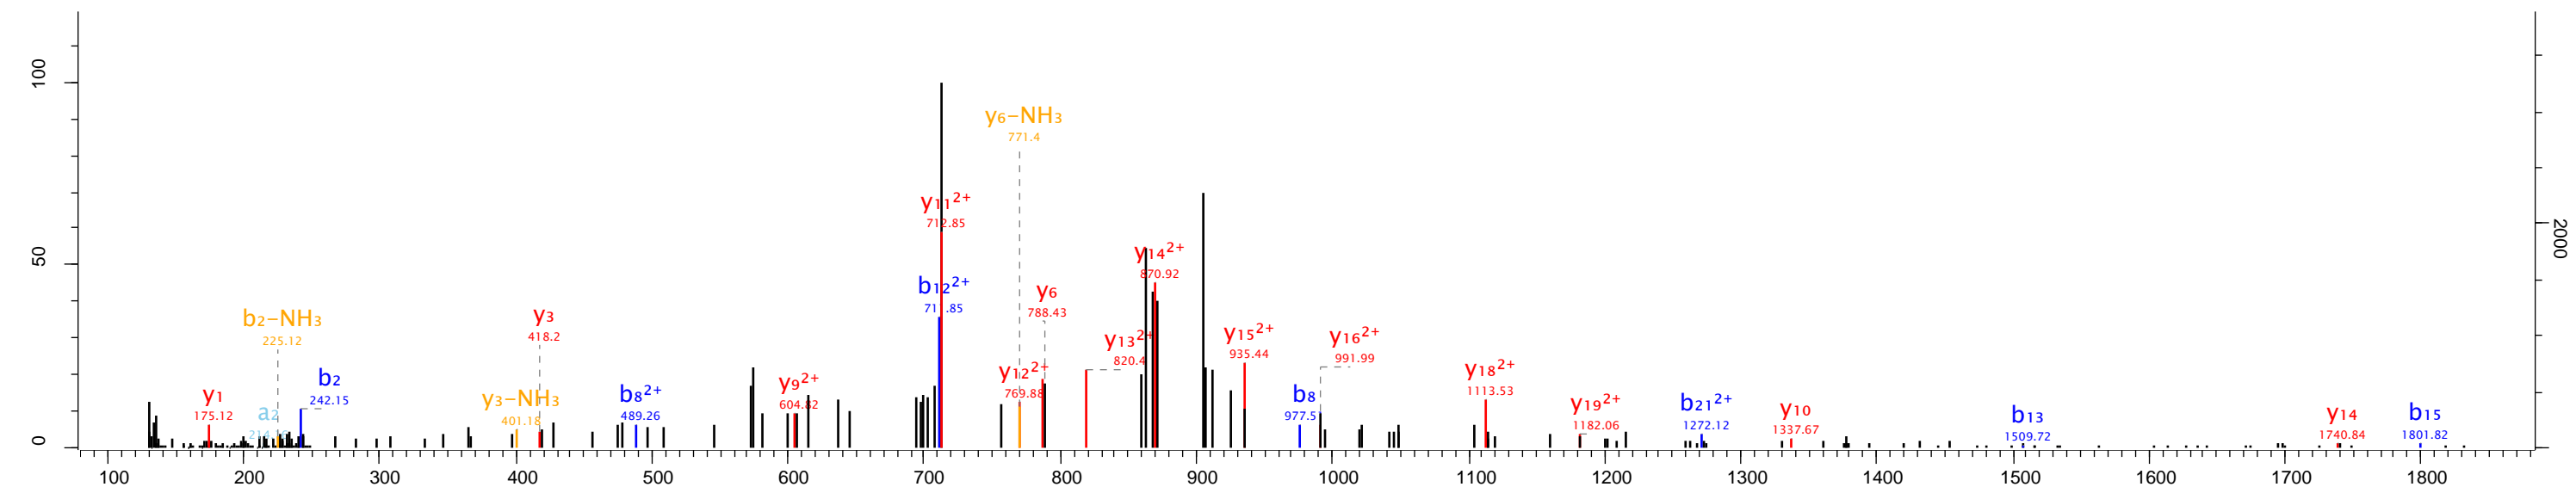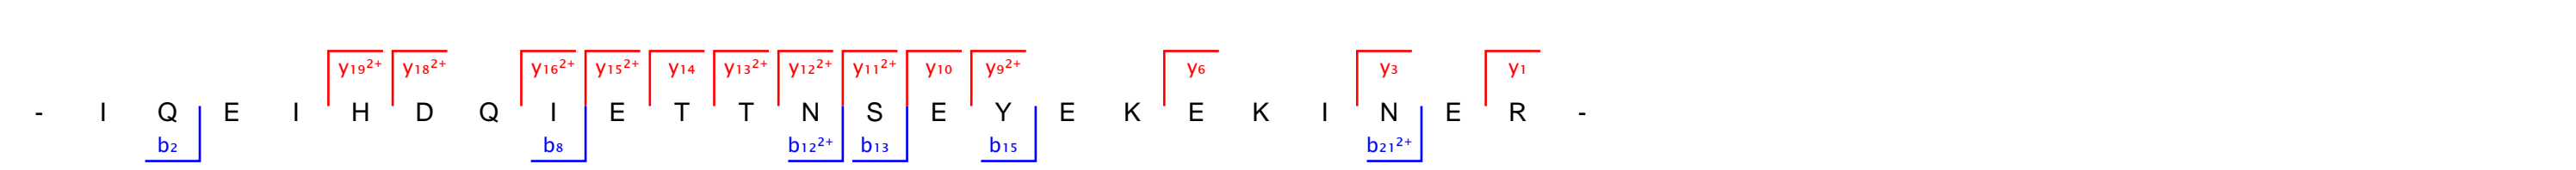

Spectral Annotation for Single-Peptide IDs between Single D11 Cells using Q-OT-LIT



Raw file 2015-01-08\_CL03\_Blastomere-15 Scan 26920 Method ITMS; HCD Score 73.5 m/z 586.29

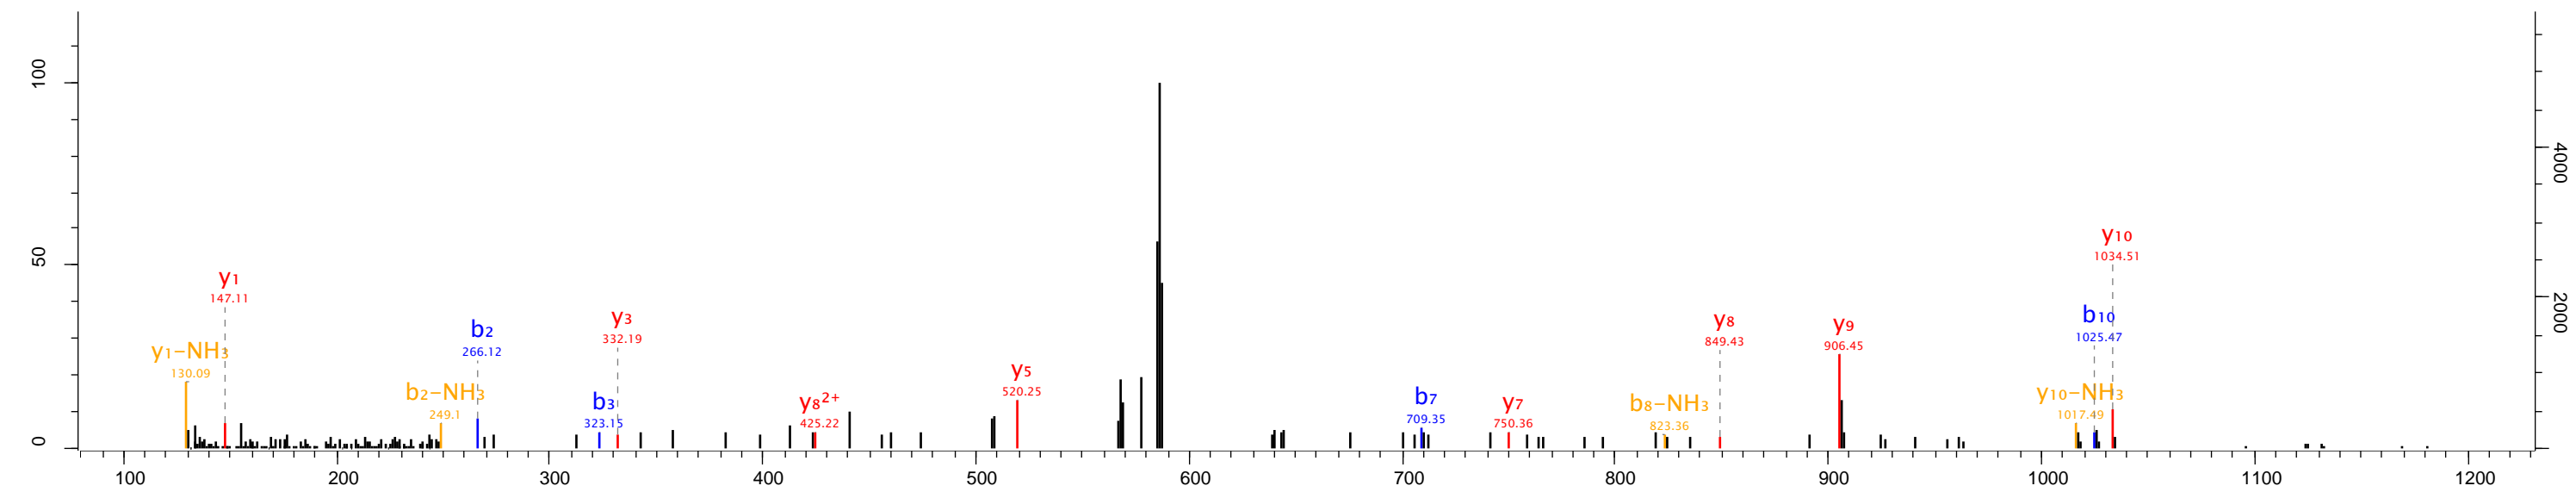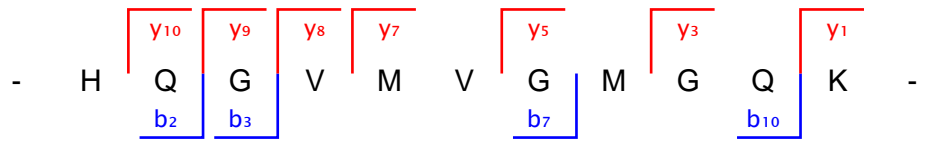

Spectral Annotation for Single-Peptide IDs between Single D11 Cells using Q-OT-LIT

Raw file: 2015-01-08\_CL03\_Blastomere-15  
 Scan: 26943 Method: ITMS; HCD Score: 123.96 m/z: 586.28

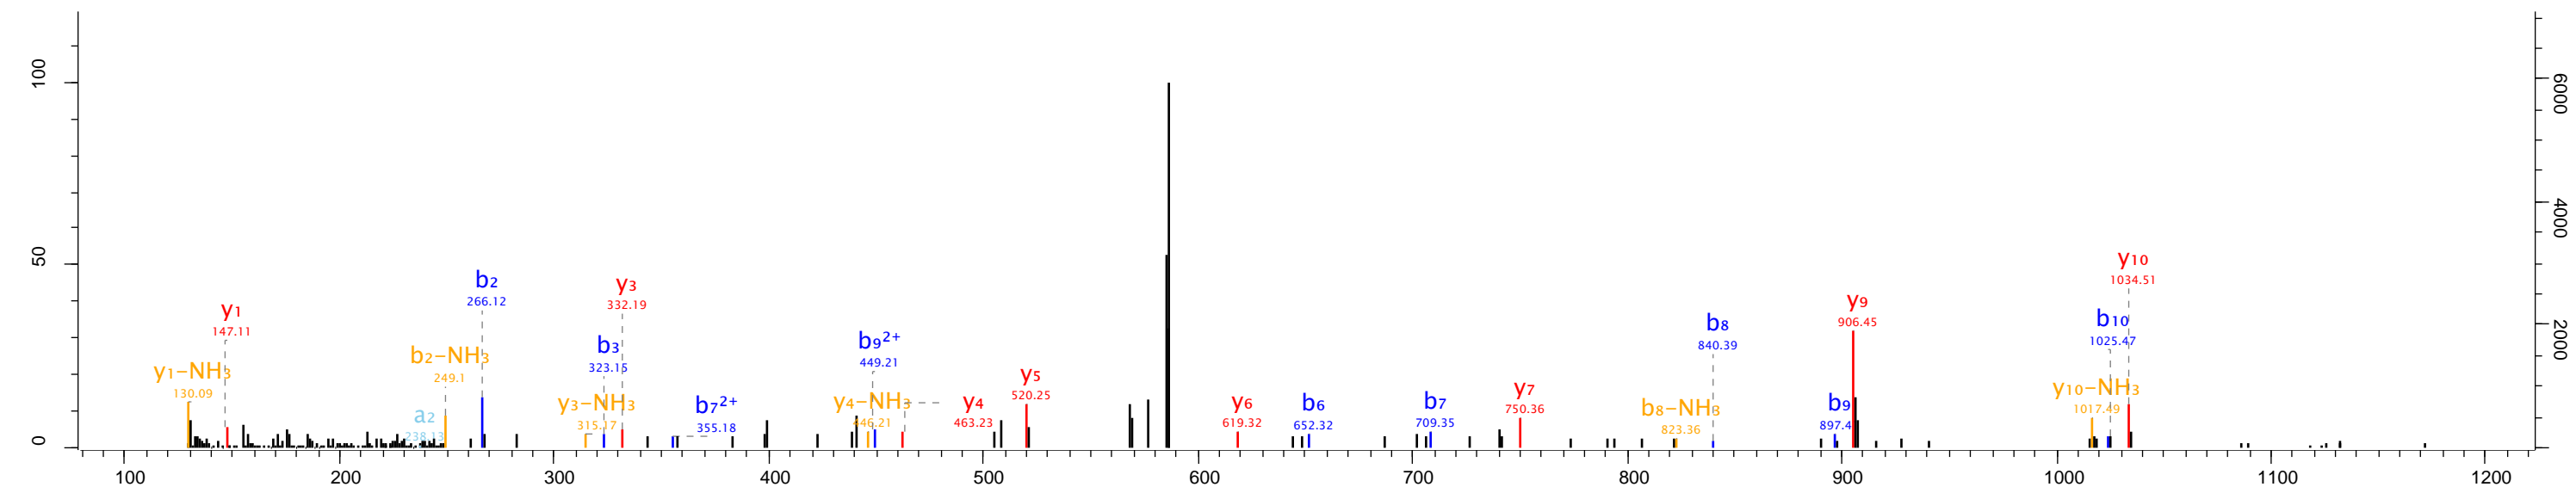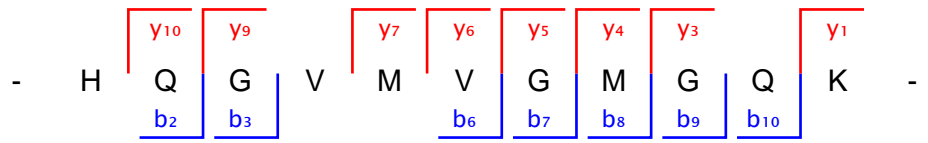

Spectral Annotation for Single-Peptide IDs between Single D11 Cells using Q-OT-LIT

Raw file 2015-01-08\_CL03\_Blastomere-15 Scan 26958 Method ITMS; HCD Score 89.9 m/z 586.29

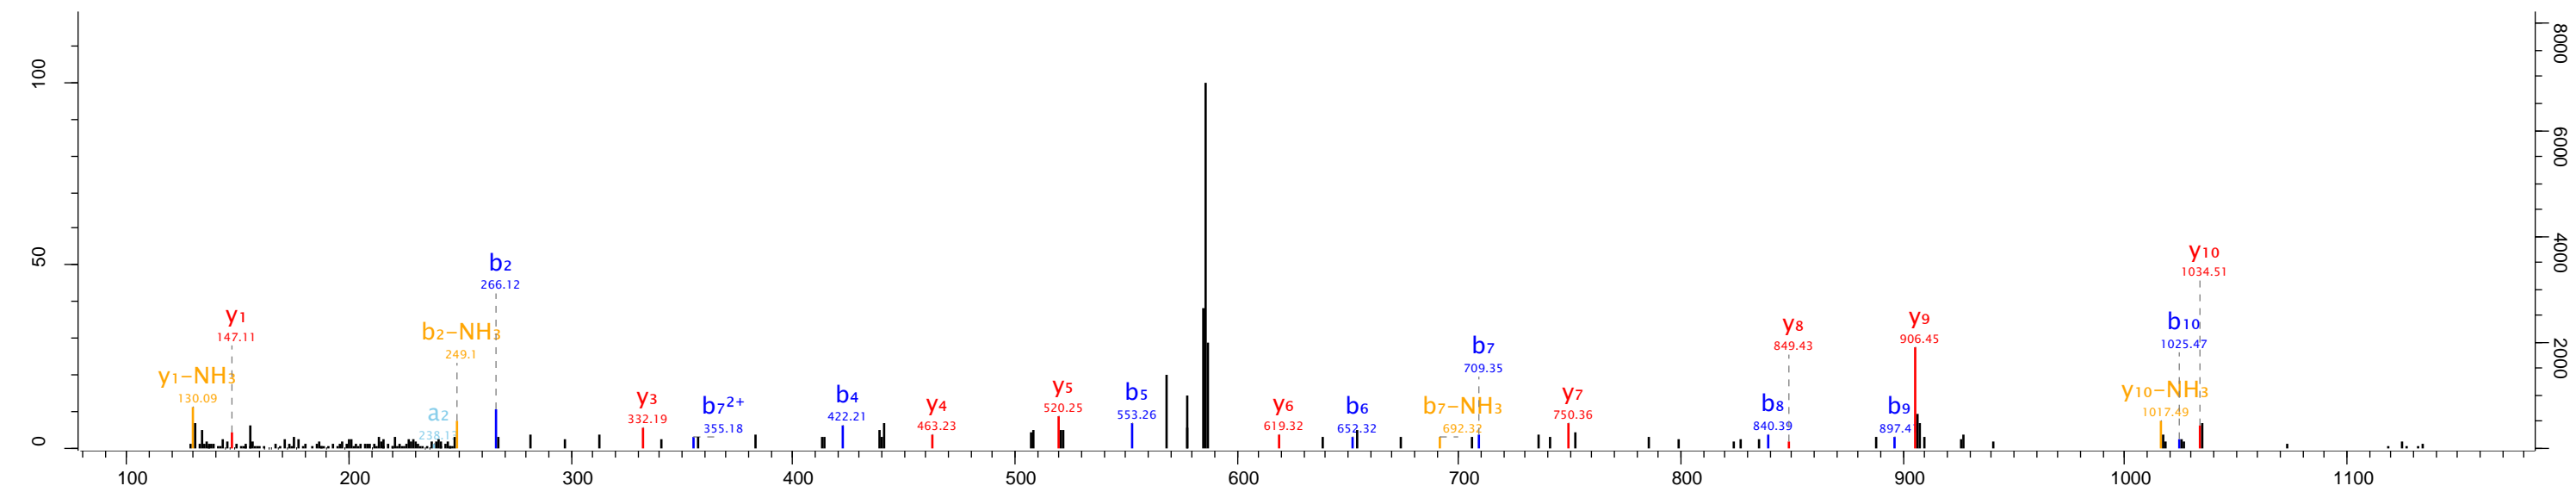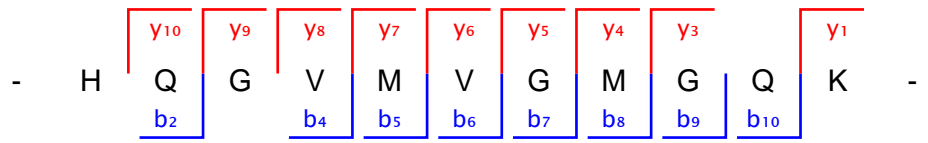

Spectral Annotation for Single-Peptide IDs between Single D11 Cells using Q-OT-LIT

Raw file 2015-01-08\_CL03\_Blastomere-15 Scan 26979 Method ITMS; HCD Score 118.28 m/z 586.29

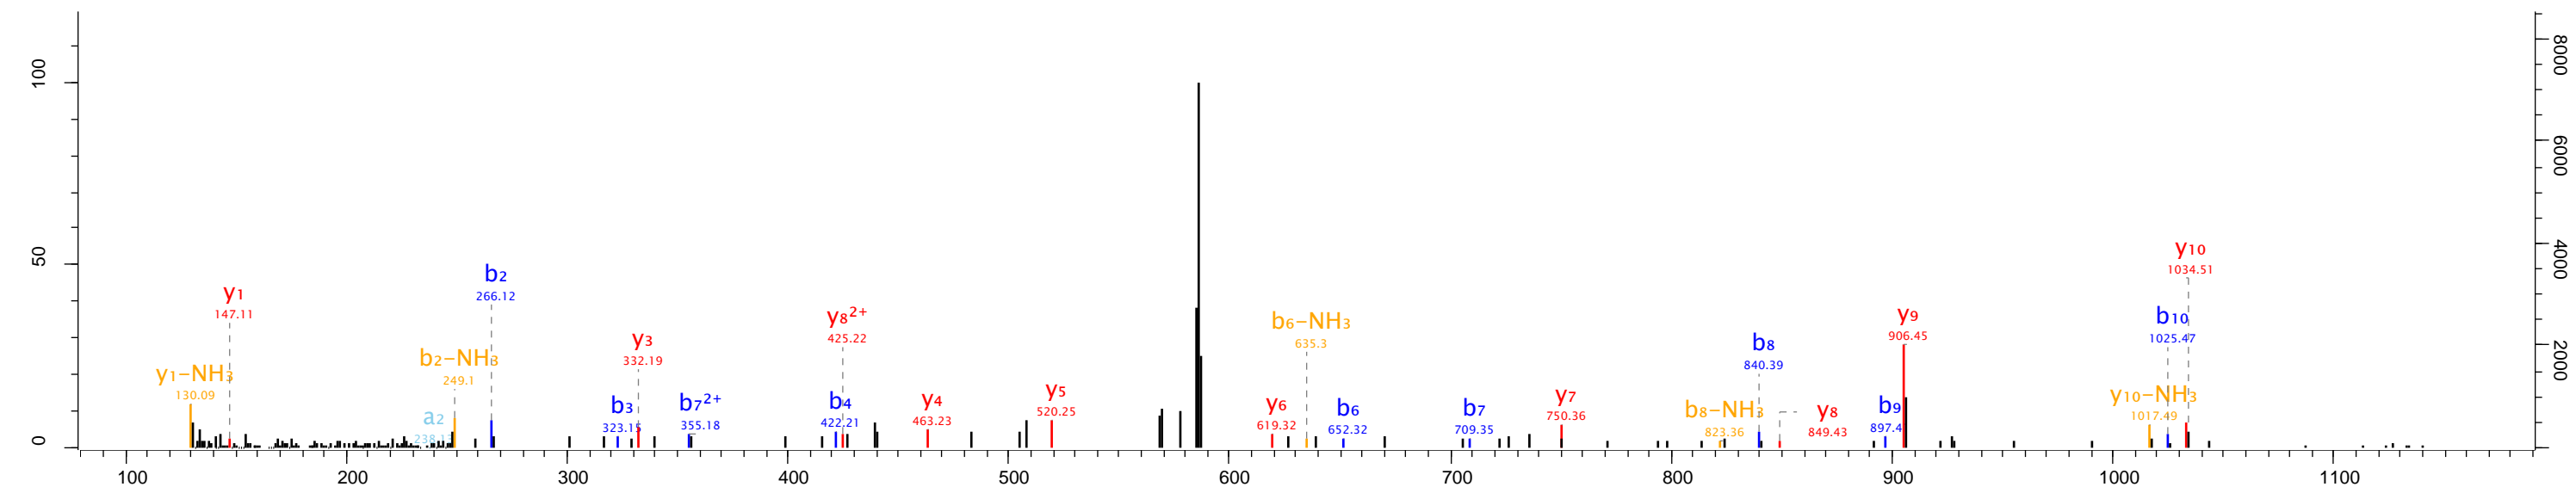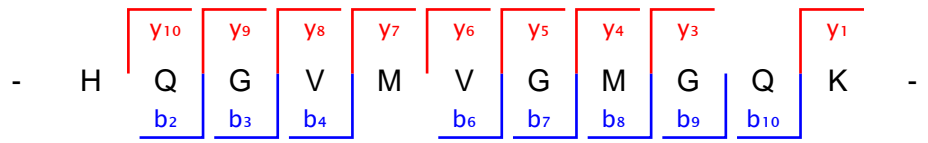

Spectral Annotation for Single-Peptide IDs between Single D11 Cells using Q-OT-LIT

Raw file 2015-01-08\_CL03\_Blastomere-15 Scan 26996 Method ITMS; HCD Score 72.2 m/z 586.29

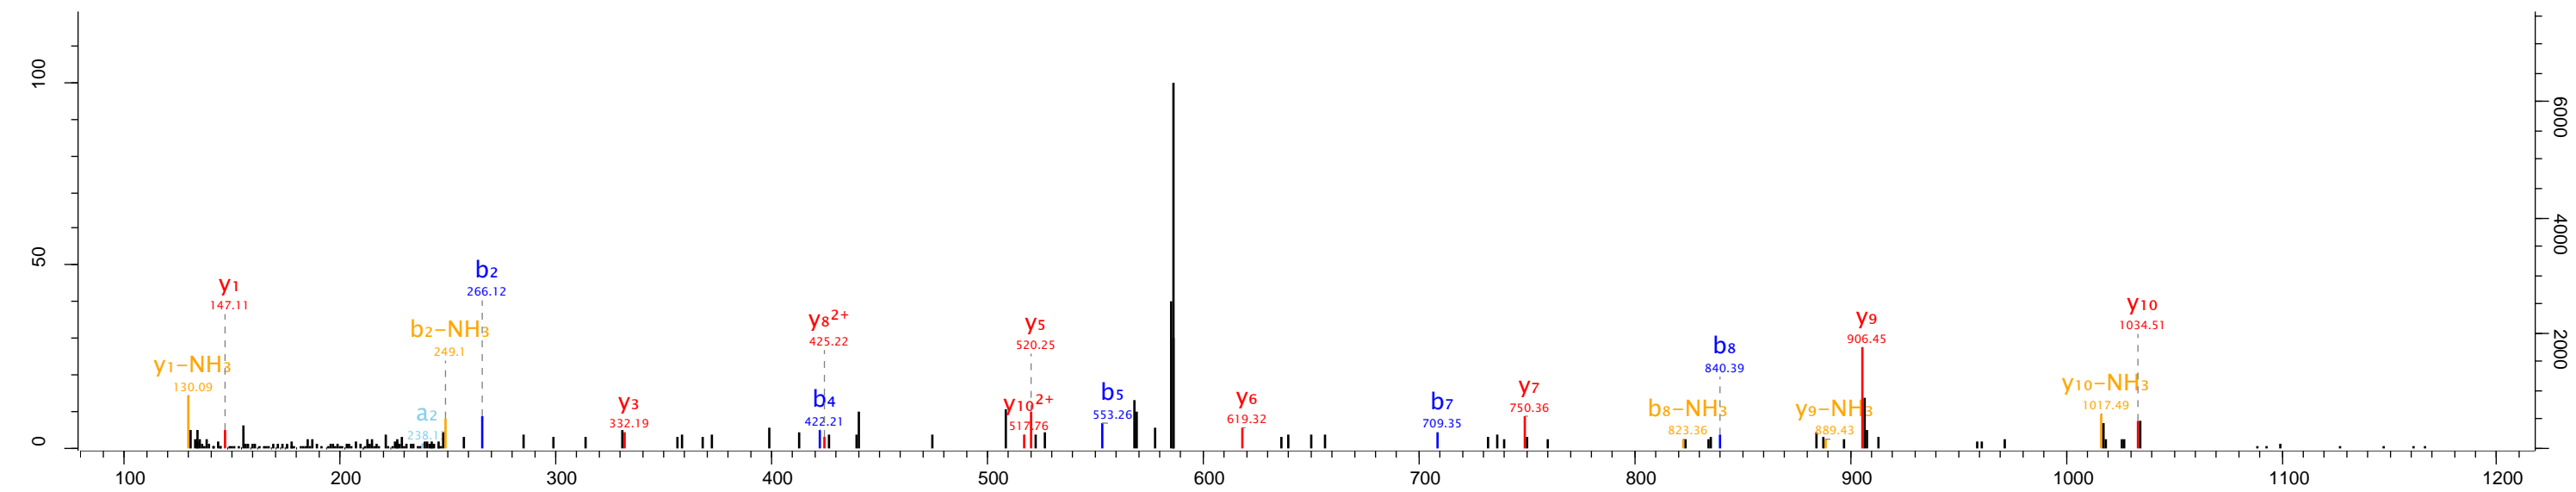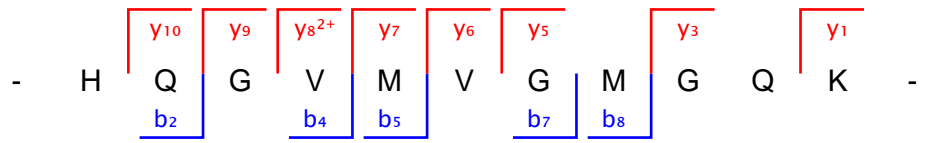

Spectral Annotation for Single-Peptide IDs between Single D11 Cells using Q-OT-LIT

Raw file: 2015-01-08\_CL03\_Blastomere-15  
 Scan: 27010 Method: ITMS; HCD Score: 113.44 m/z: 586.29

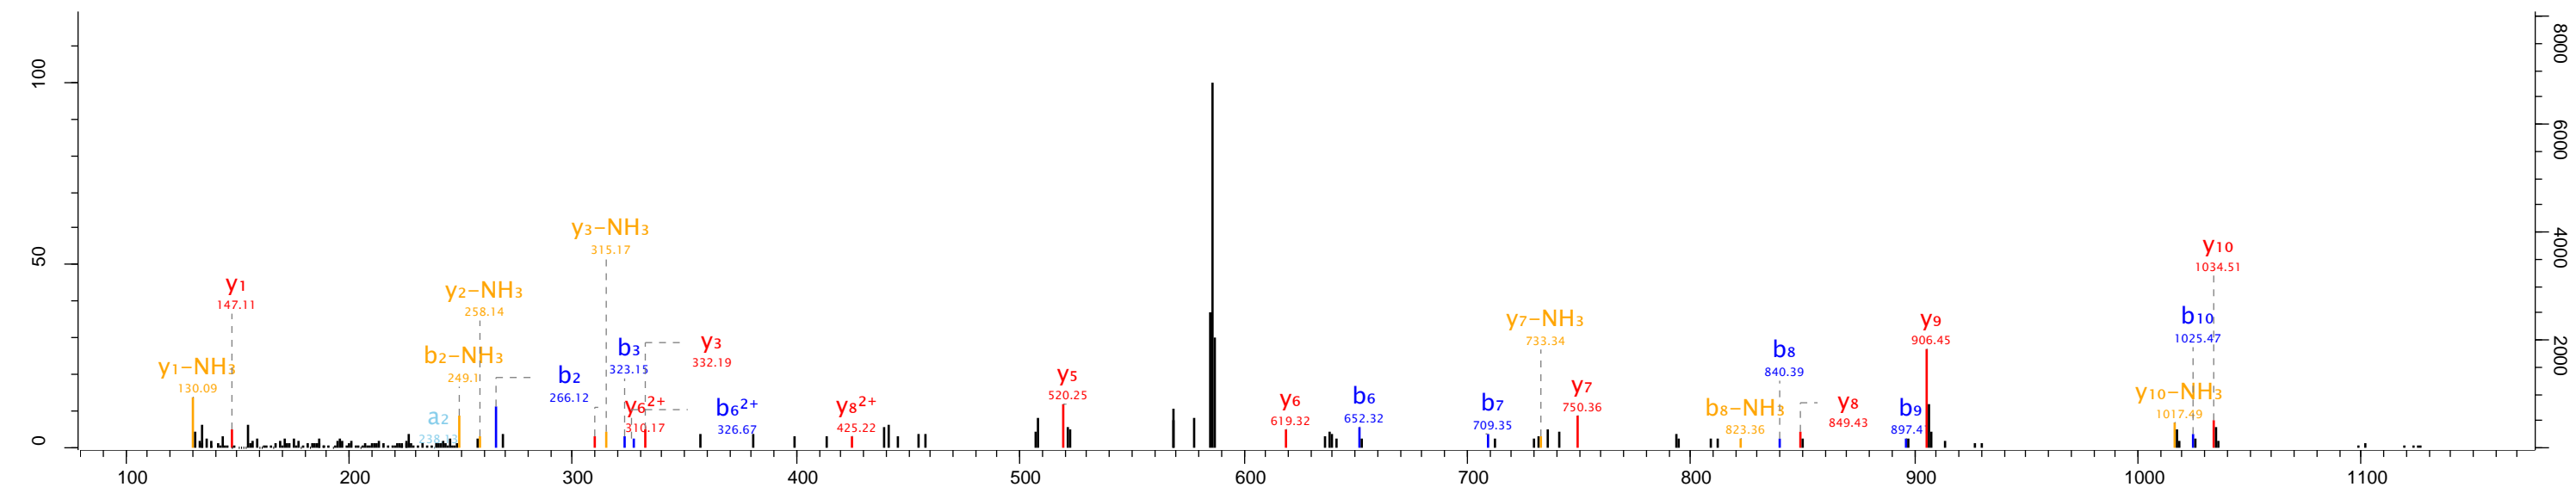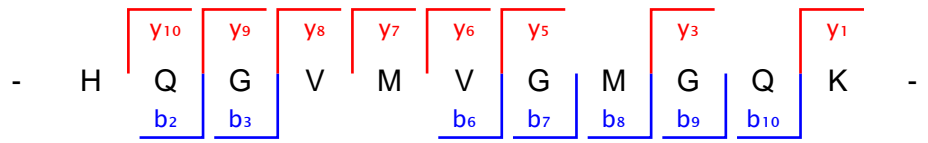

Spectral Annotation for Single-Peptide IDs between Single D11 Cells using Q-OT-LIT

Raw file 2015-01-08\_CL03\_Blastomere-15 Scan 27033 Method ITMS; HCD Score 118.71 m/z 400.24

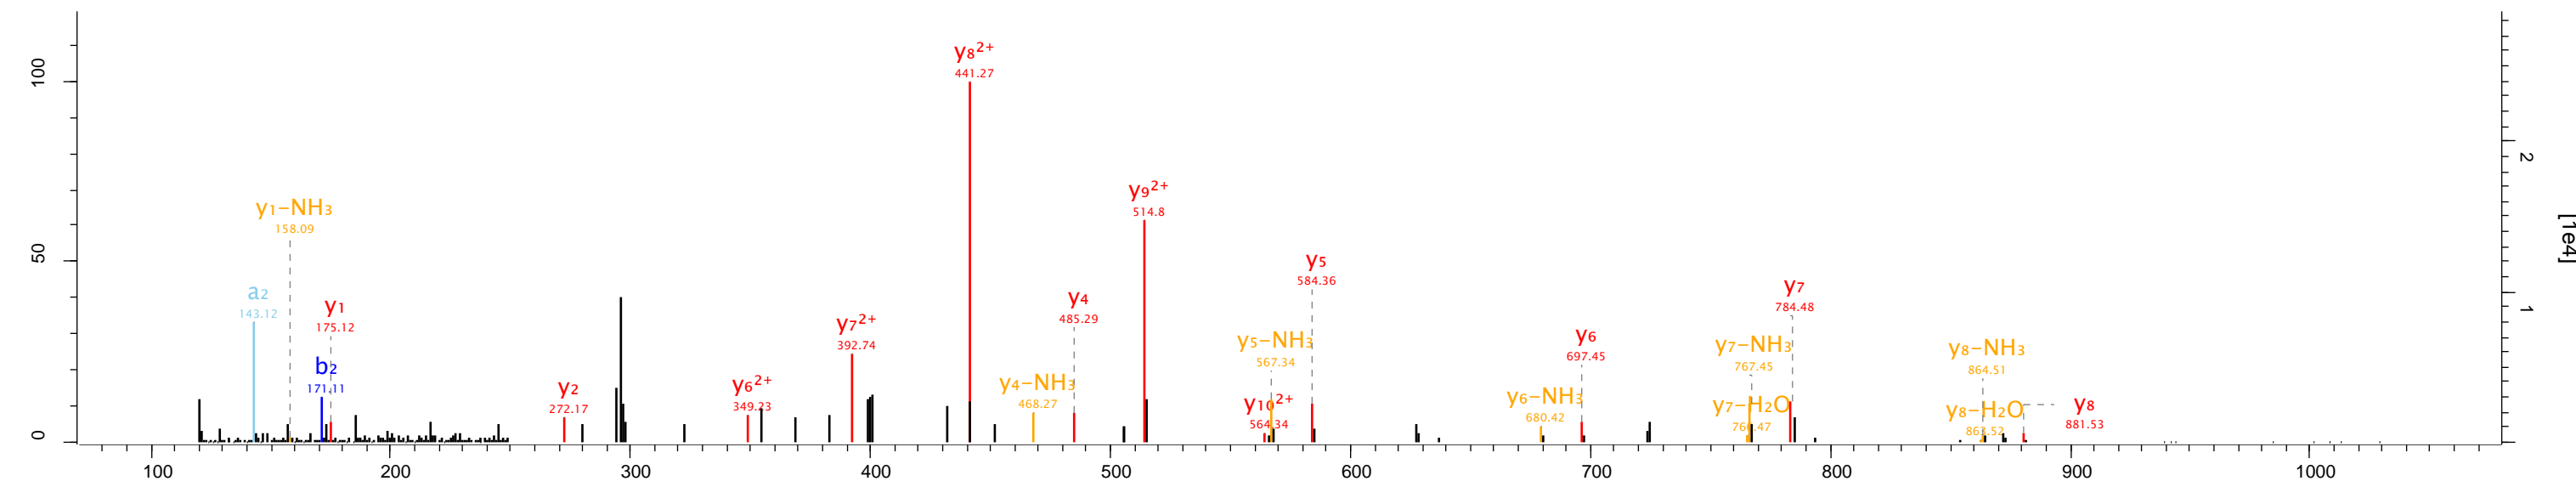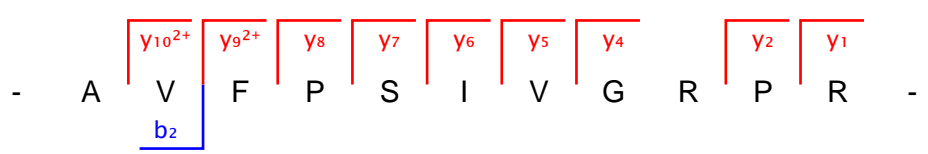

Raw file 2015-01-08\_CL03\_Blastomere-15 Scan 27263 Method ITMS; HCD Score 65.24 m/z 396.24

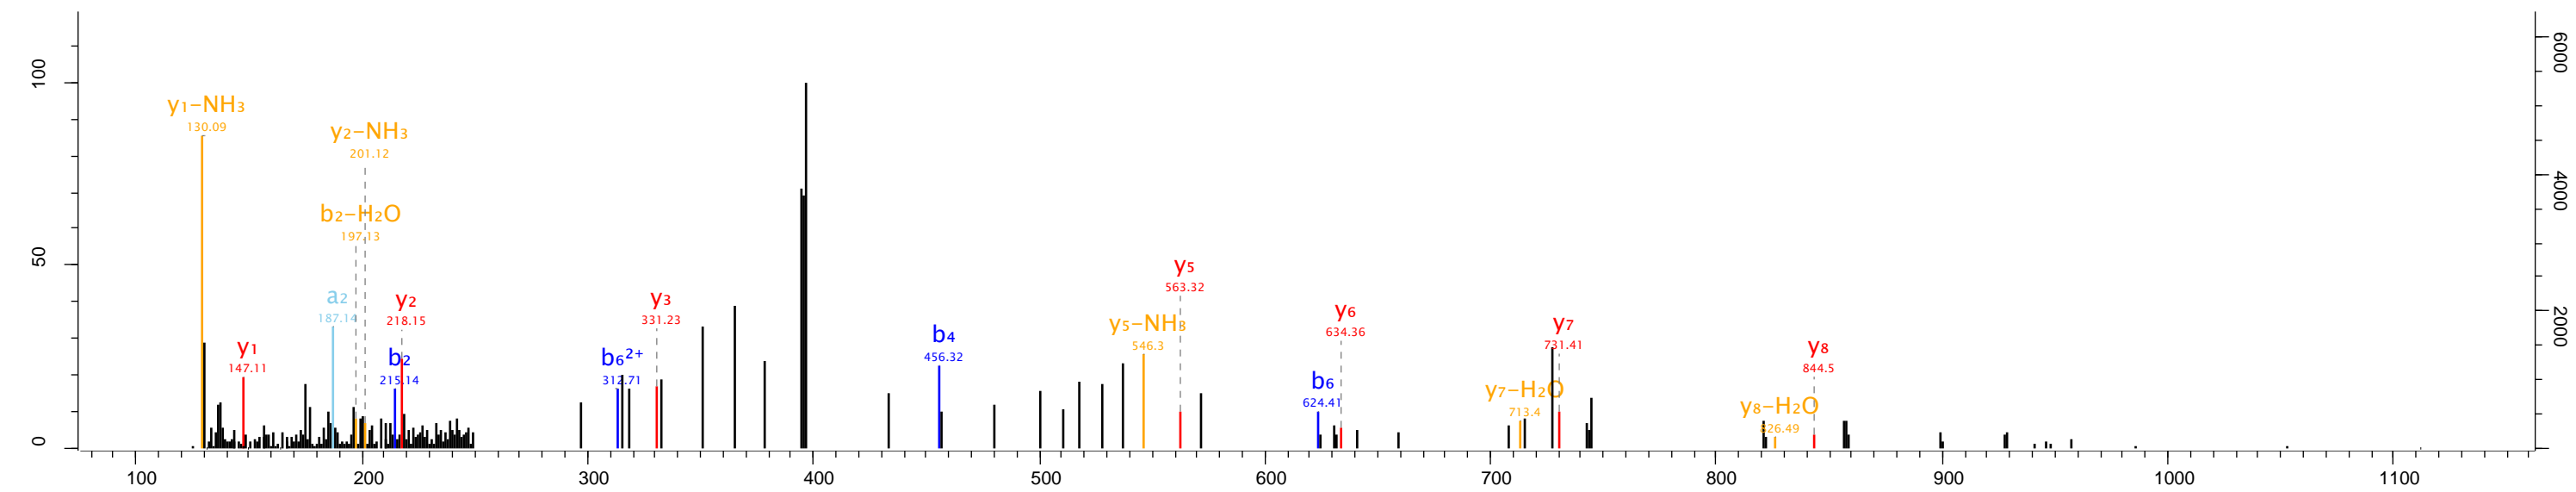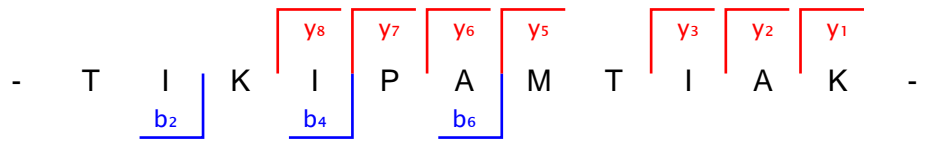

Spectral Annotation for Single-Peptide IDs between Single D11 Cells using Q-OT-LIT



Raw file 2015-01-08\_CL03\_Blastomere-15 Scan 27306 Method ITMS; HCD Score 118.71 m/z 400.24

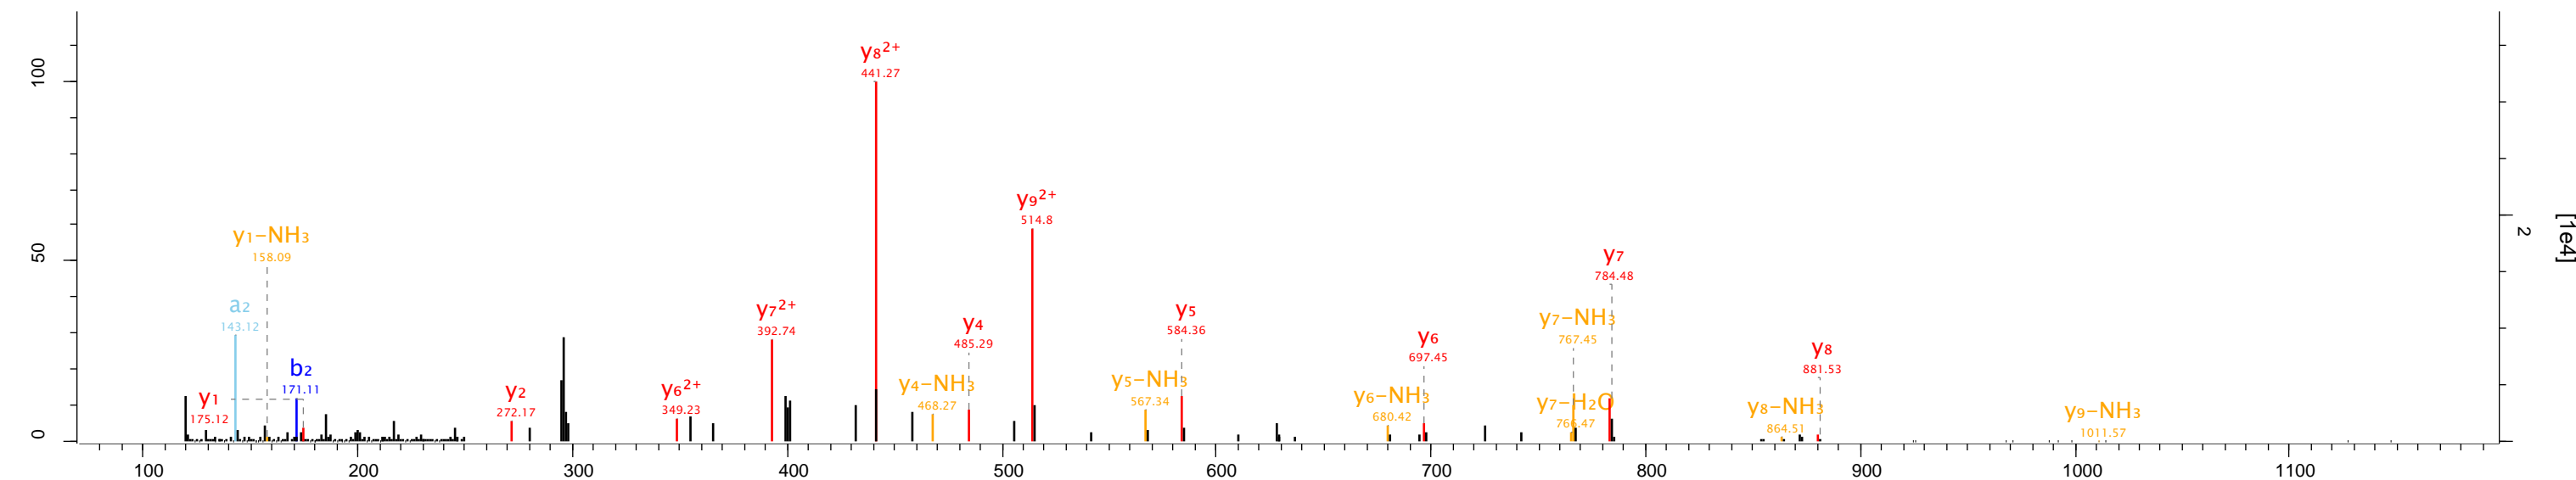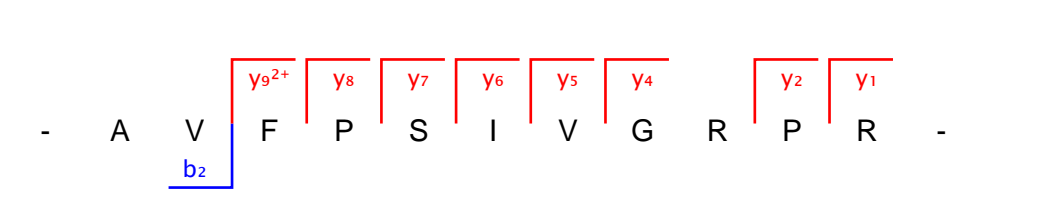

Raw file 2015-01-08\_CL03\_Blastomere-15 Scan 27321 Method ITMS; HCD Score 96.67 m/z 400.24

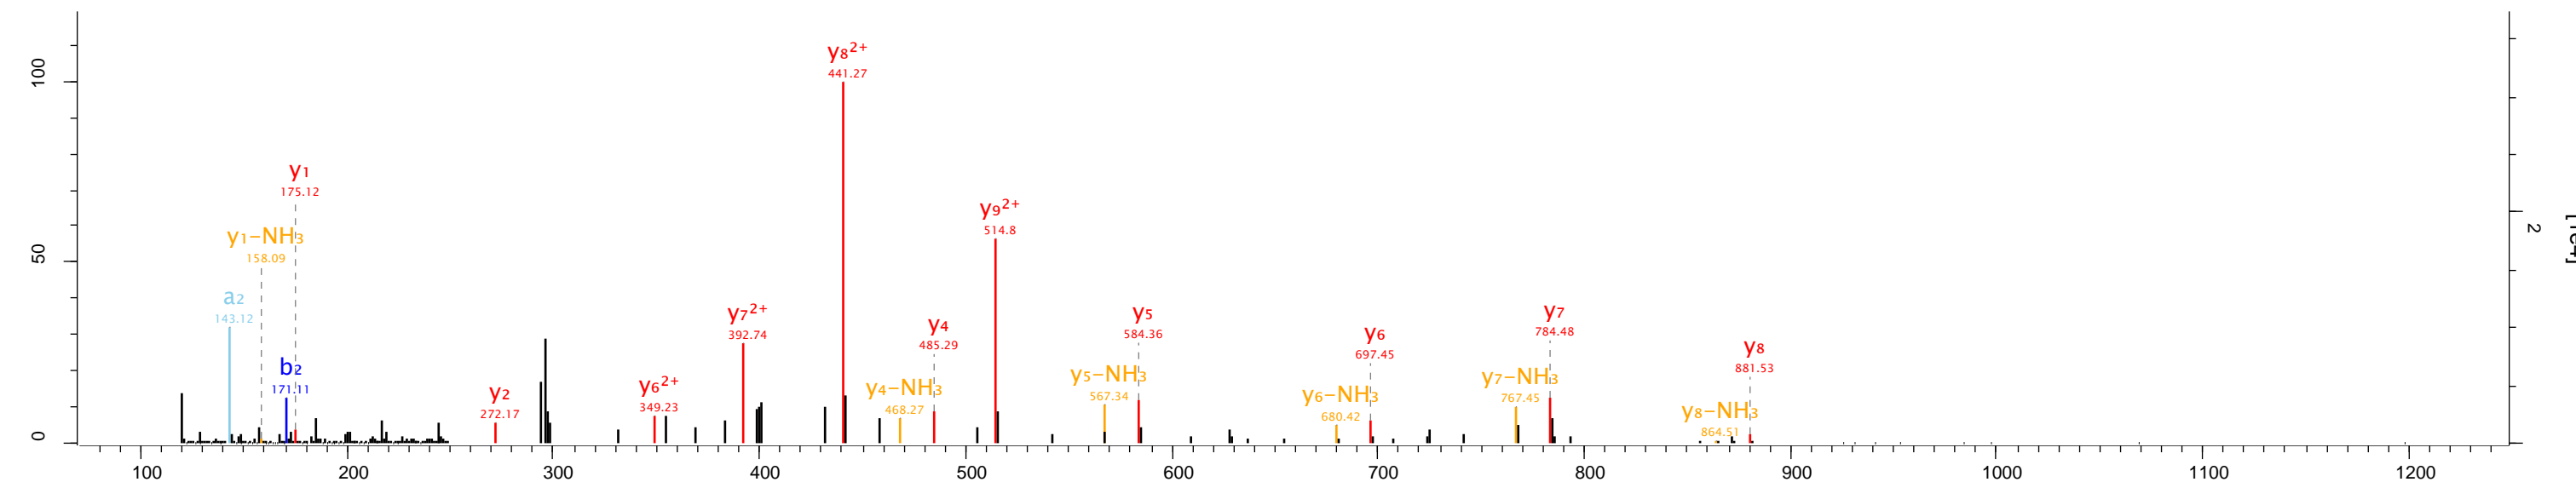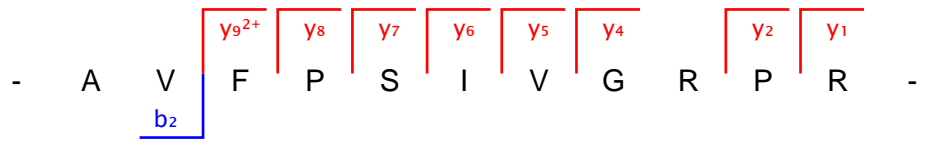

Spectral Annotation for Single-Peptide IDs between Single D11 Cells using Q-OT-LIT

Raw file 2015-01-08\_CL03\_Blastomere-15 Scan 27341 Method ITMS; HCD Score 125.97 m/z 400.24

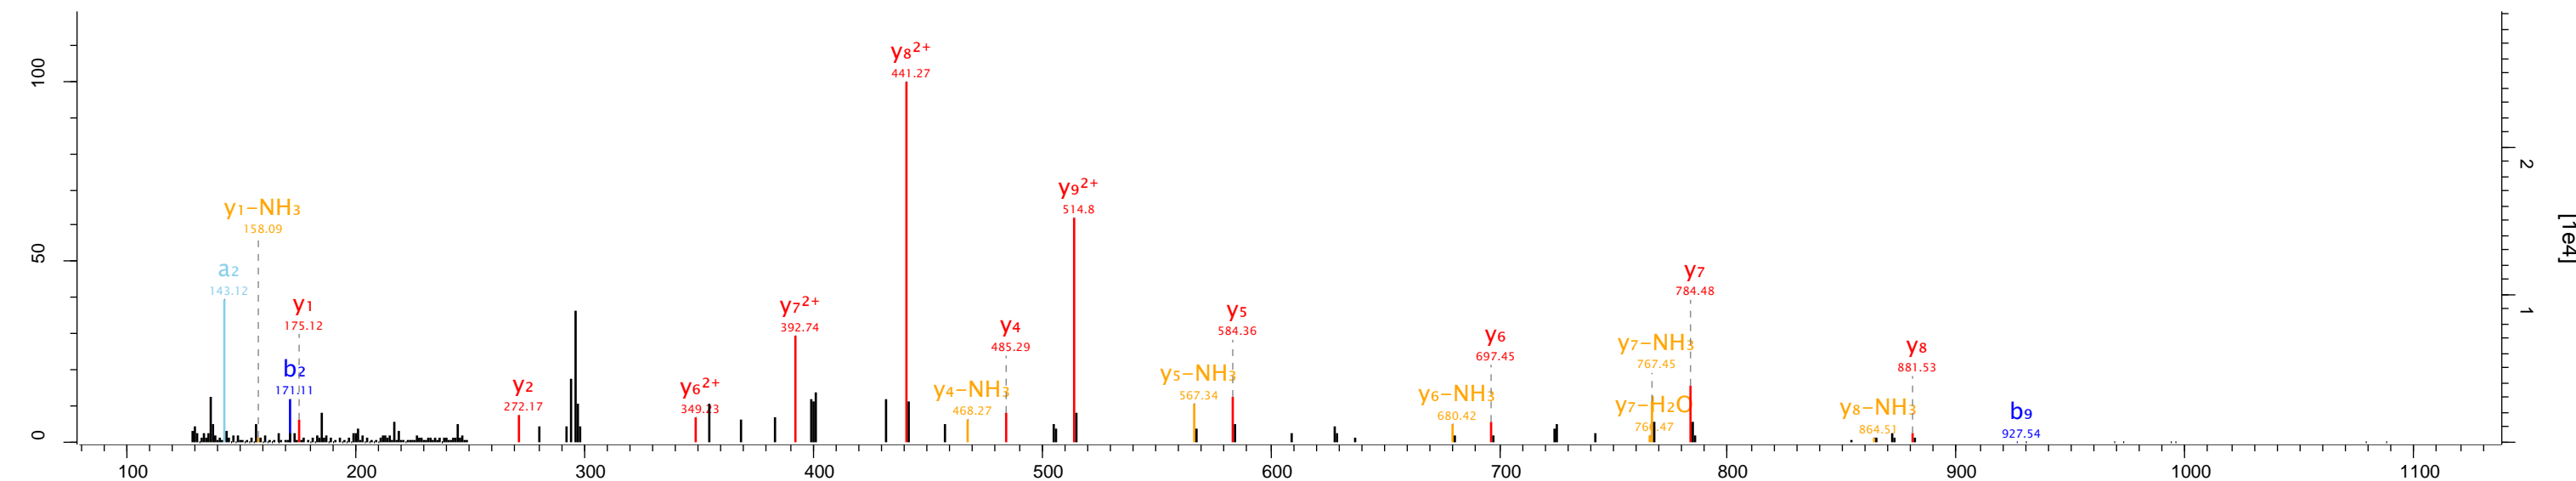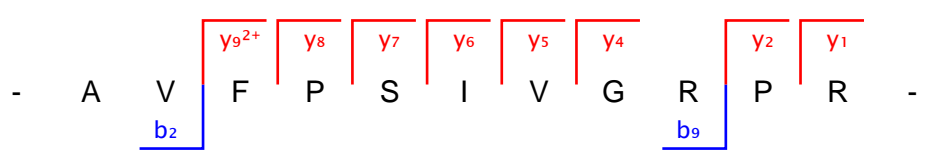

Spectral Annotation for Single-Peptide IDs between Single D11 Cells using Q-OT-LIT

Raw file 2015-01-08\_CL03\_Blastomere-15 Scan 27576 Method ITMS; HCD Score 40.37 m/z 531.24

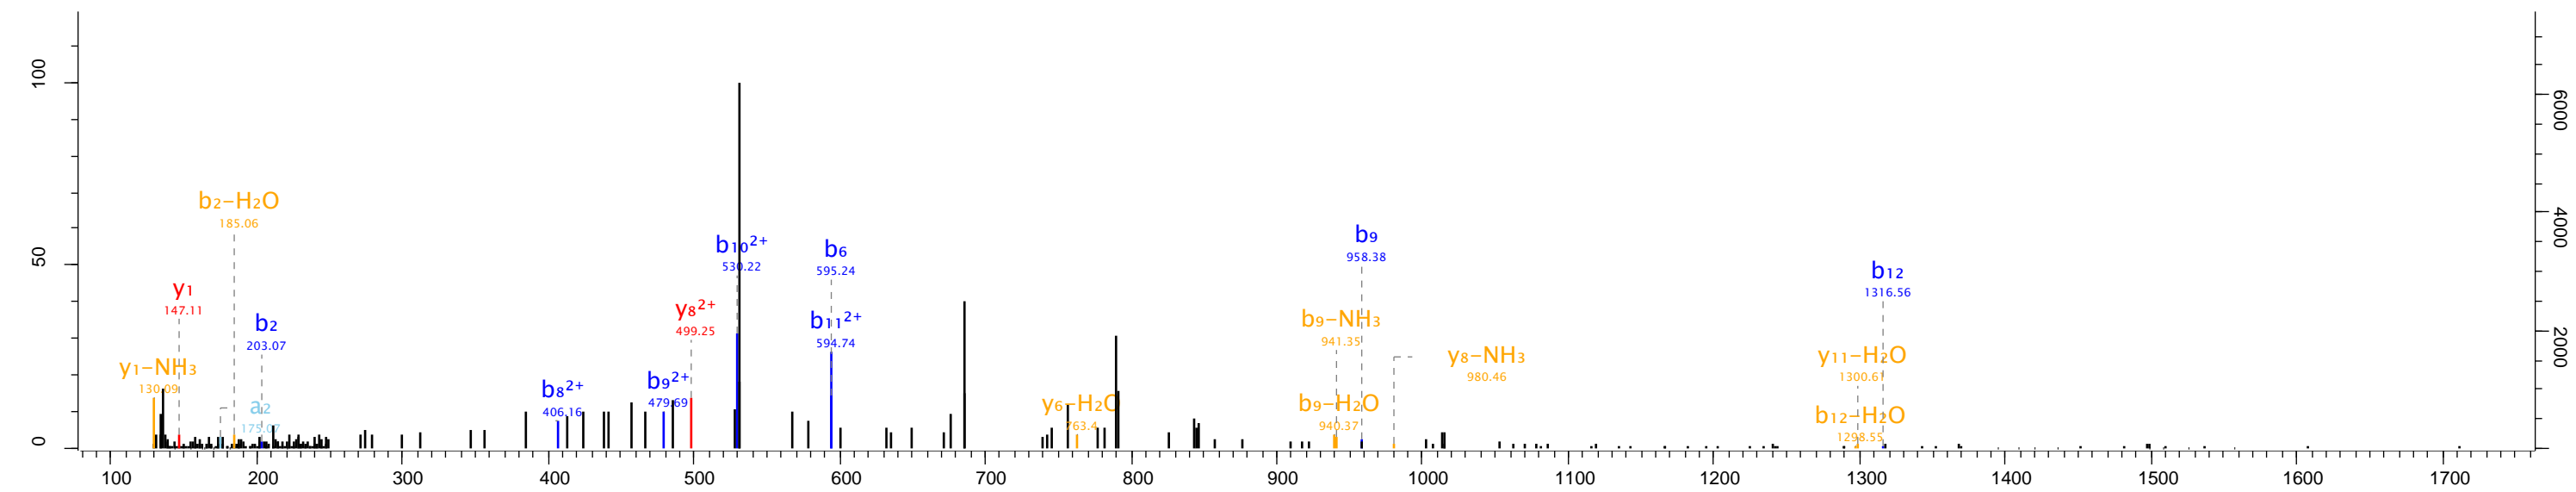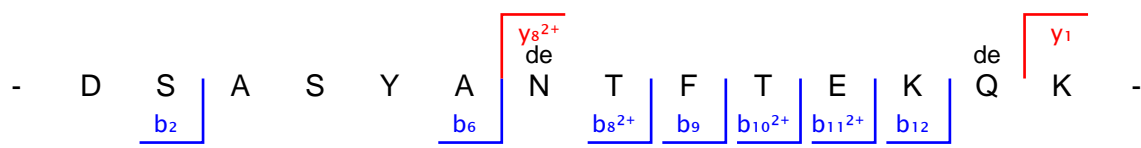

Spectral Annotation for Single-Peptide IDs between Single D11 Cells using Q-OT-LIT

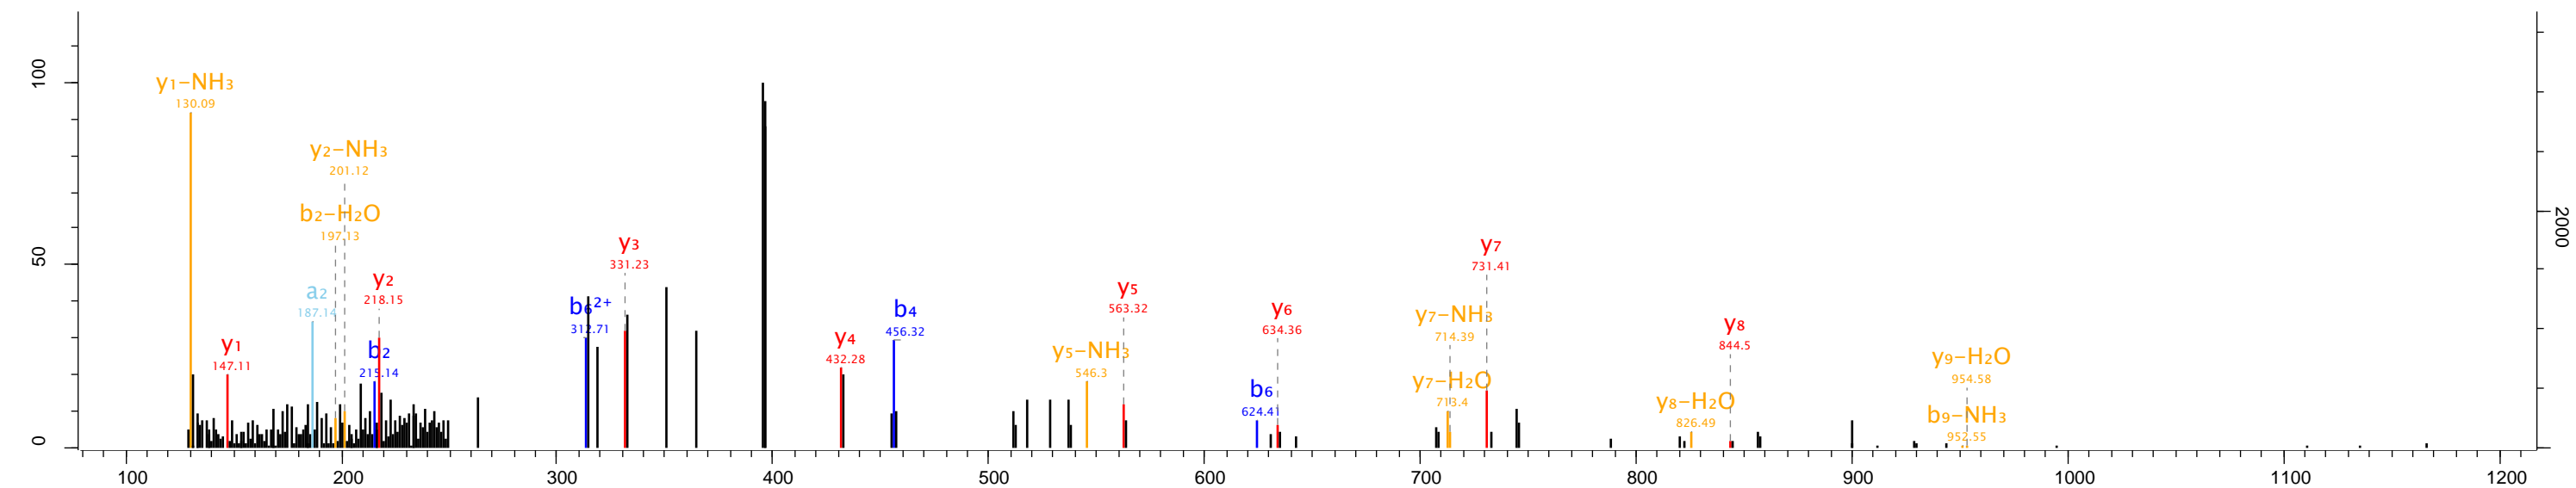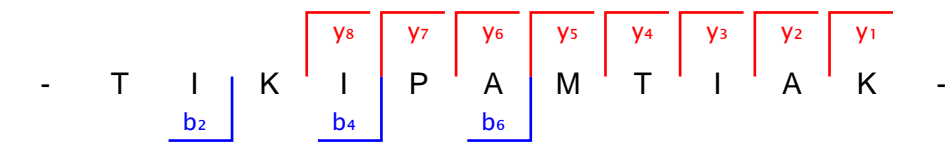

Raw file 2015-01-08\_CL03\_Blastomere-15 Scan 27653 Method ITMS; HCD Score 97.45 m/z 396.24

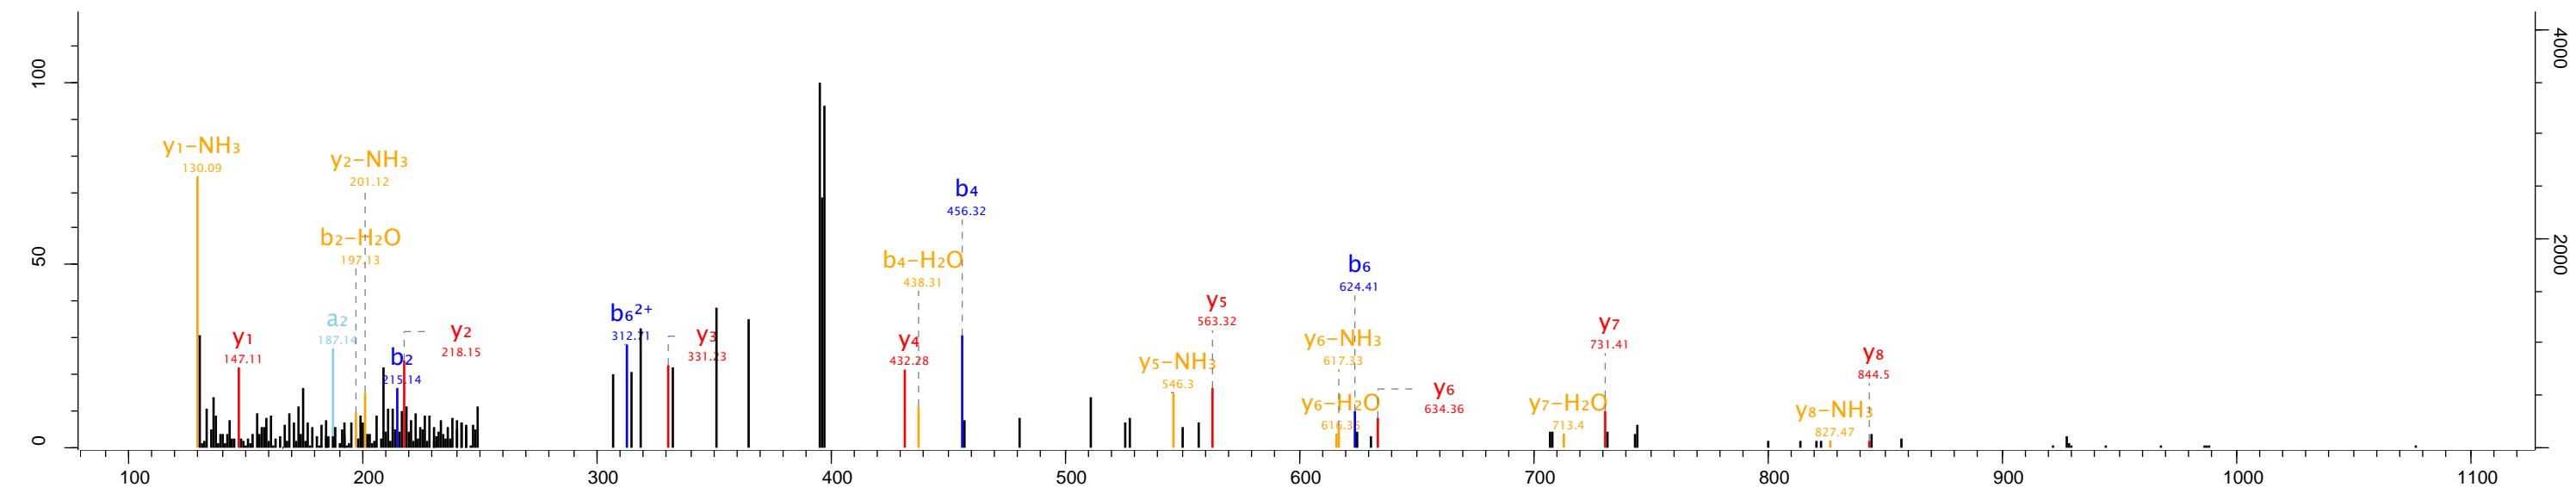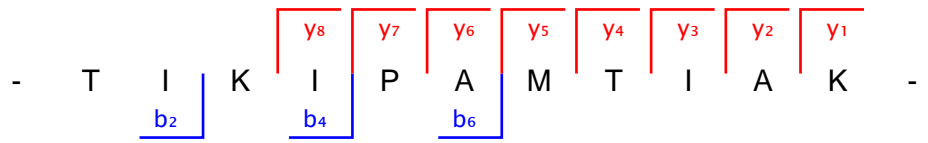

Spectral Annotation for Single-Peptide IDs between Single D11 Cells using Q-OT-LIT

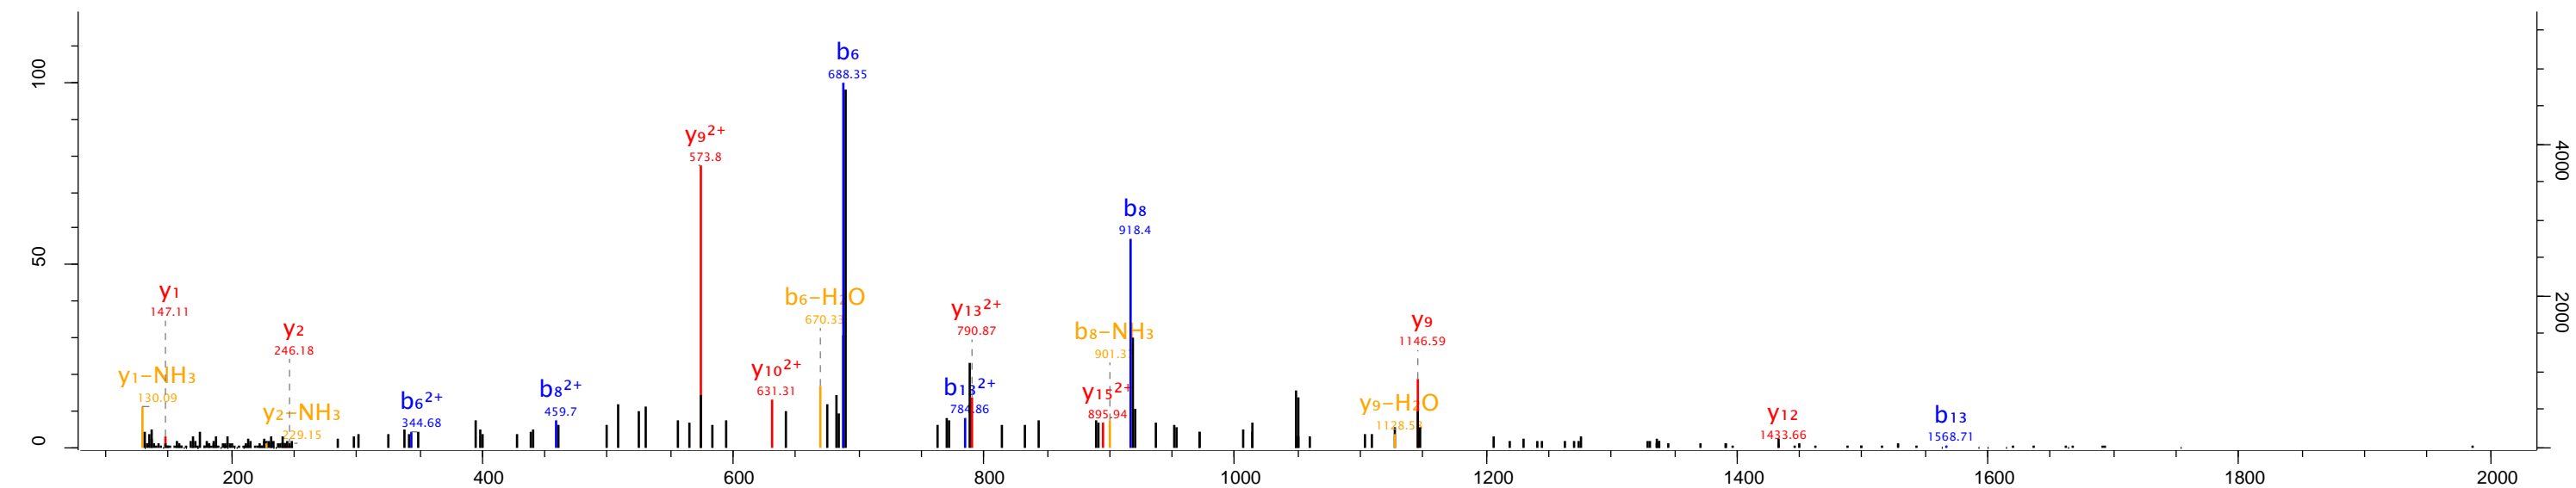

- S W I P F G de N D Y I I M N Y S V K -

Fragmentation annotations (red boxes): y15 2+ (I), y13 2+ (F), y12 (G), y10 2+ (D), y9 (Y), y2 (V), y1 (K)

Fragmentation annotations (blue boxes): b6 (G), b8 (D), b13 (N)

Raw file 2015-01-08\_CL03\_Blastomere-15 Scan 28055 Method ITMS; HCD Score 54.28 m/z 704.36

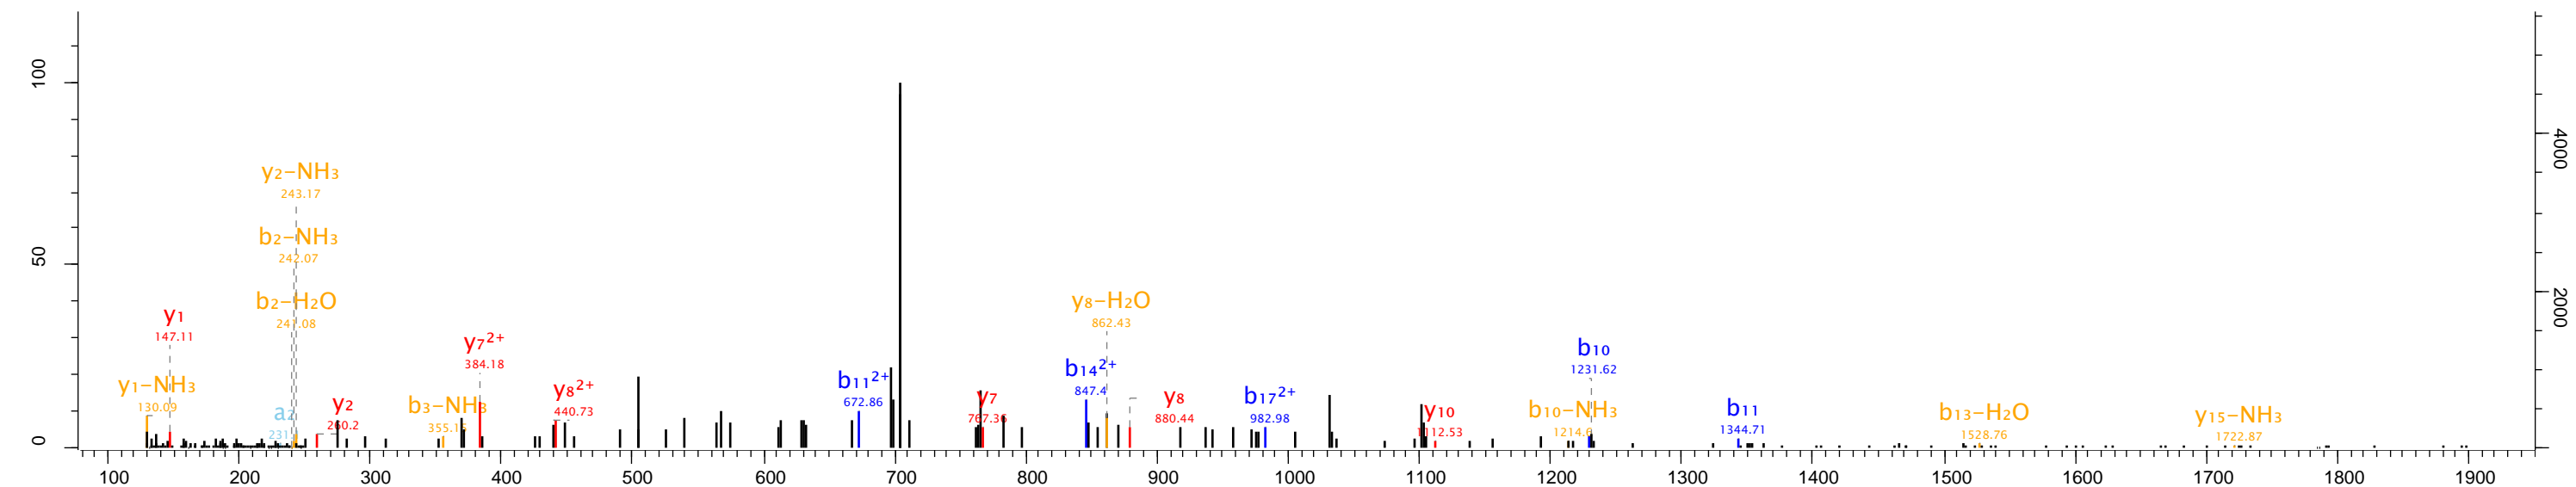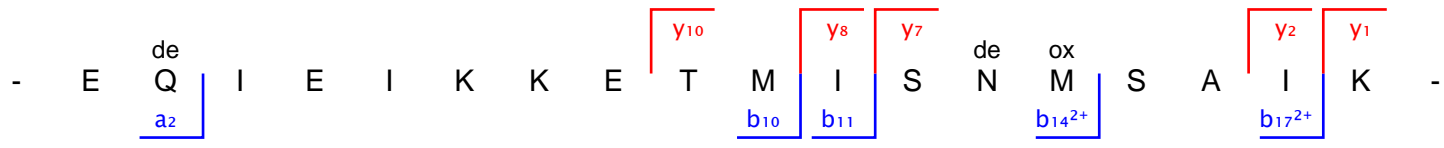

Spectral Annotation for Single-Peptide IDs between Single D11 Cells using Q-OT-LIT



Raw file 2015-01-08\_CL03\_Blastomere-15 Scan 28303 Method ITMS; HCD Score 62.34 m/z 482.59

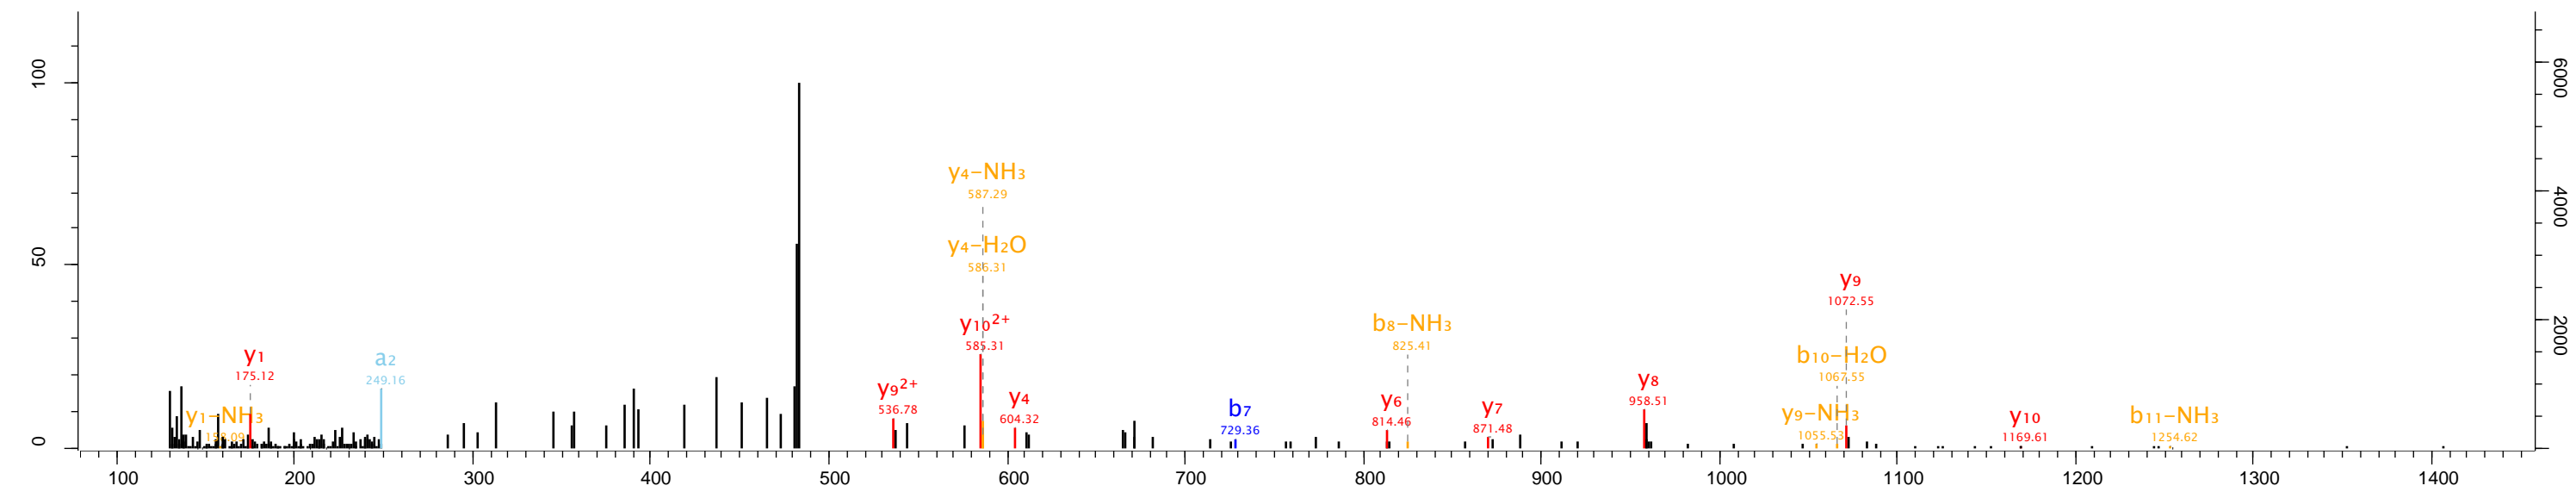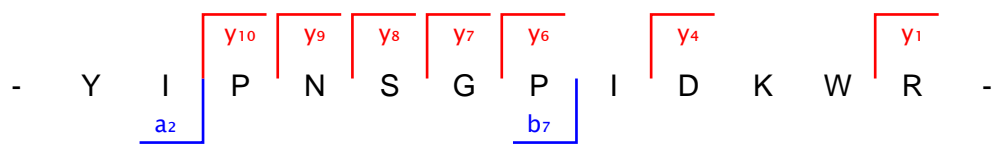

Raw file 2015-01-08\_CL03\_Blastomere-15 Scan 28539 Method ITMS; HCD Score 45.36 m/z 661.37

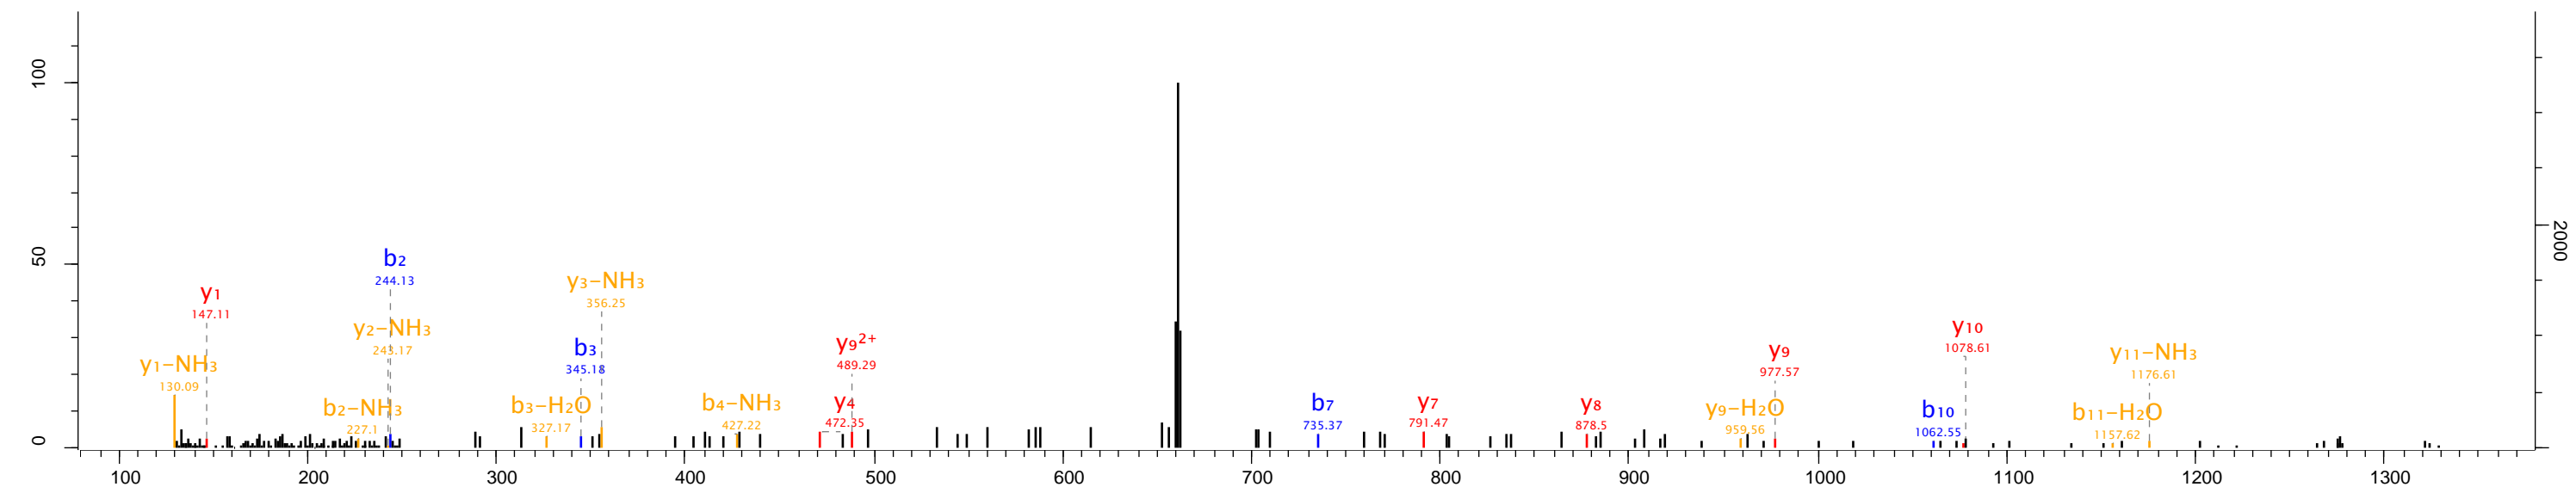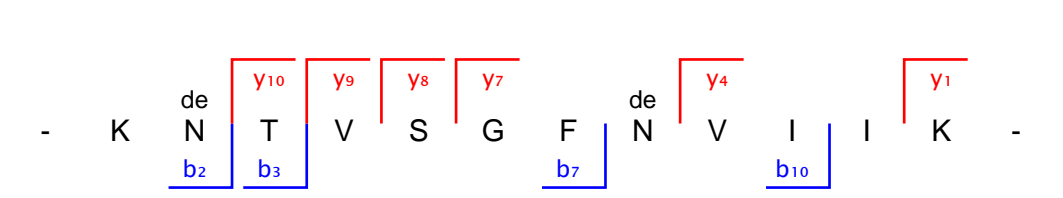

Spectral Annotation for Single-Peptide IDs between Single D11 Cells using Q-OT-LIT

Raw file 2015-01-08\_CL03\_Blastomere-15 Scan 28782 Method ITMS; HCD Score 38.88 m/z 729.39

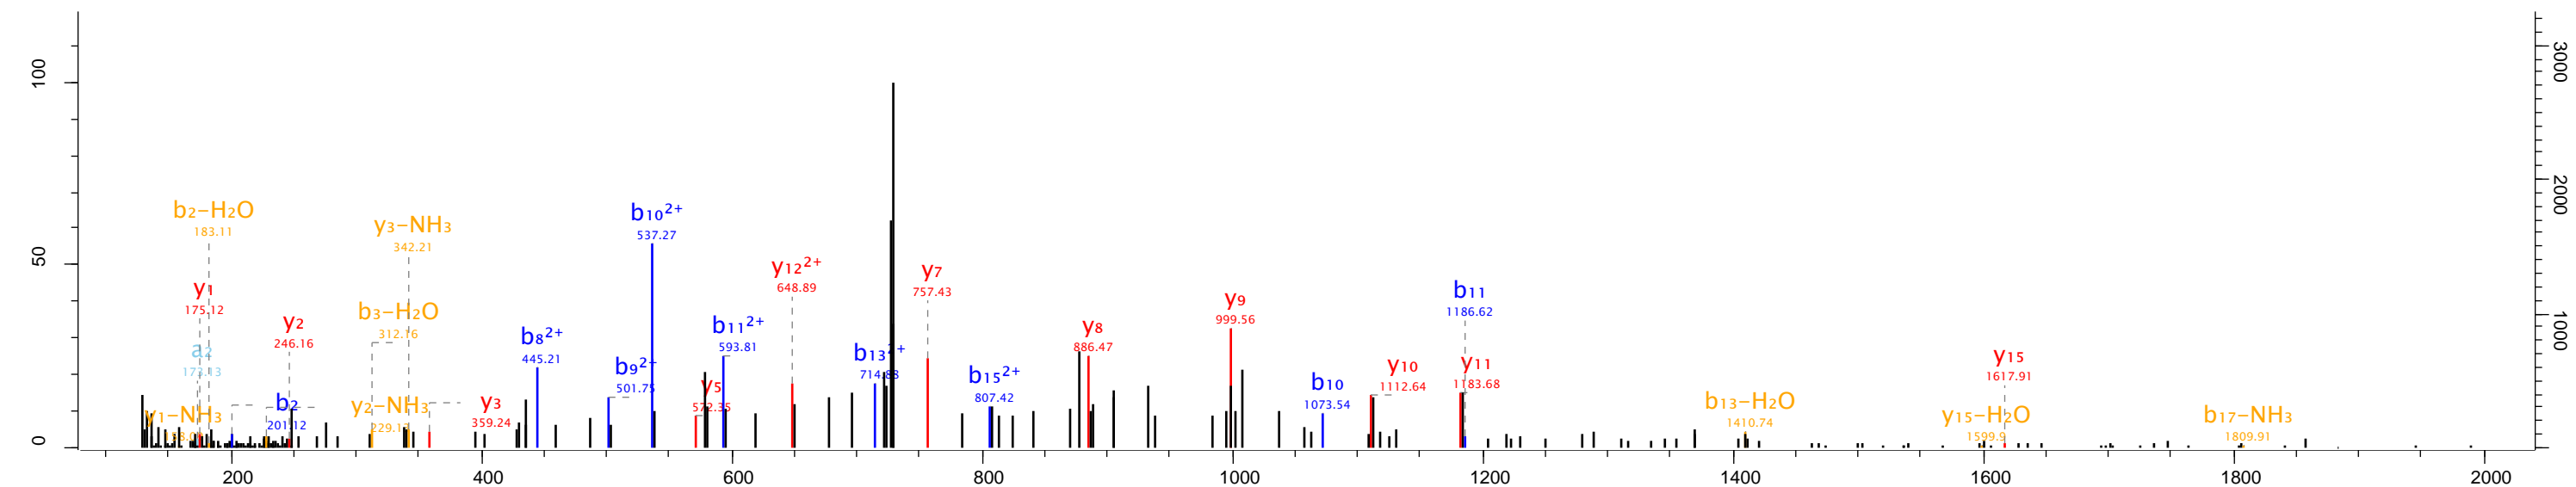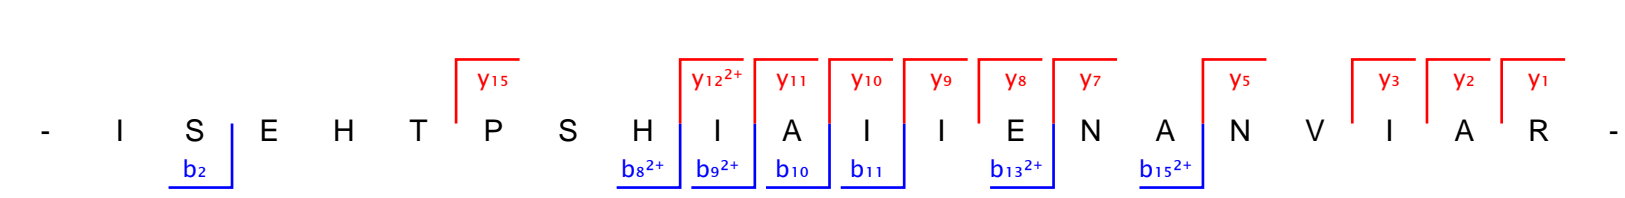

Spectral Annotation for Single-Peptide IDs between Single D11 Cells using Q-OT-LIT

Raw file 2015-01-08\_CL03\_Blastomere-15 Scan 28843 Method ITMS; HCD Score 87.67 m/z 547.3

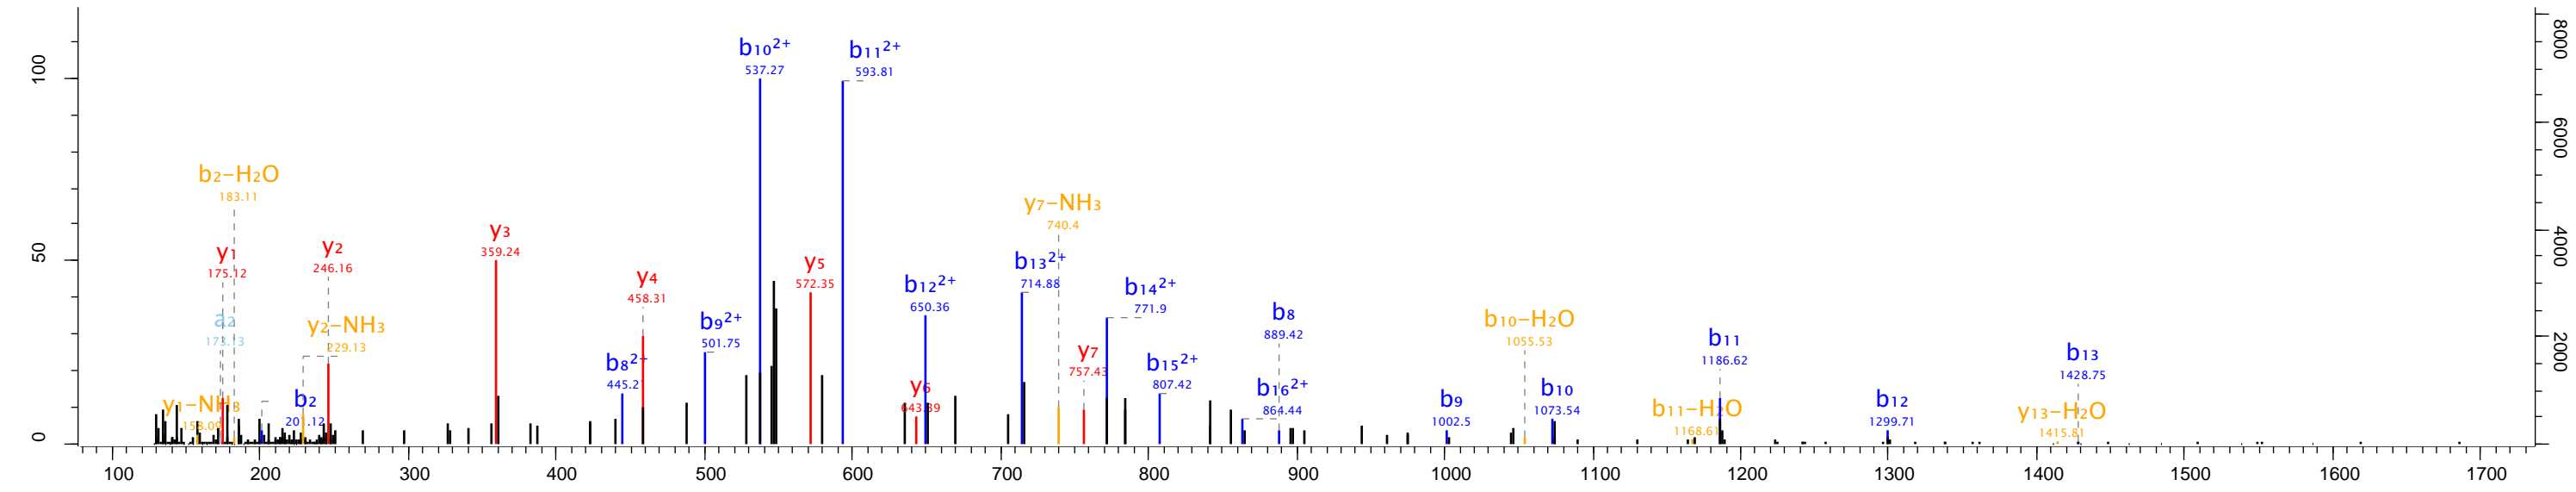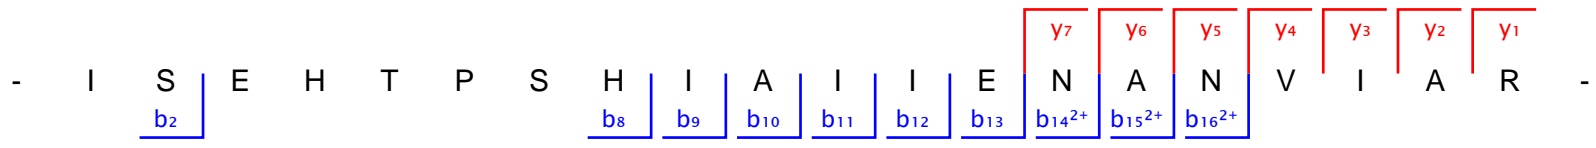

Raw file 2015-01-08\_CL03\_Blastomere-15 Scan 28858 Method ITMS; HCD Score 57.16 m/z 677.81

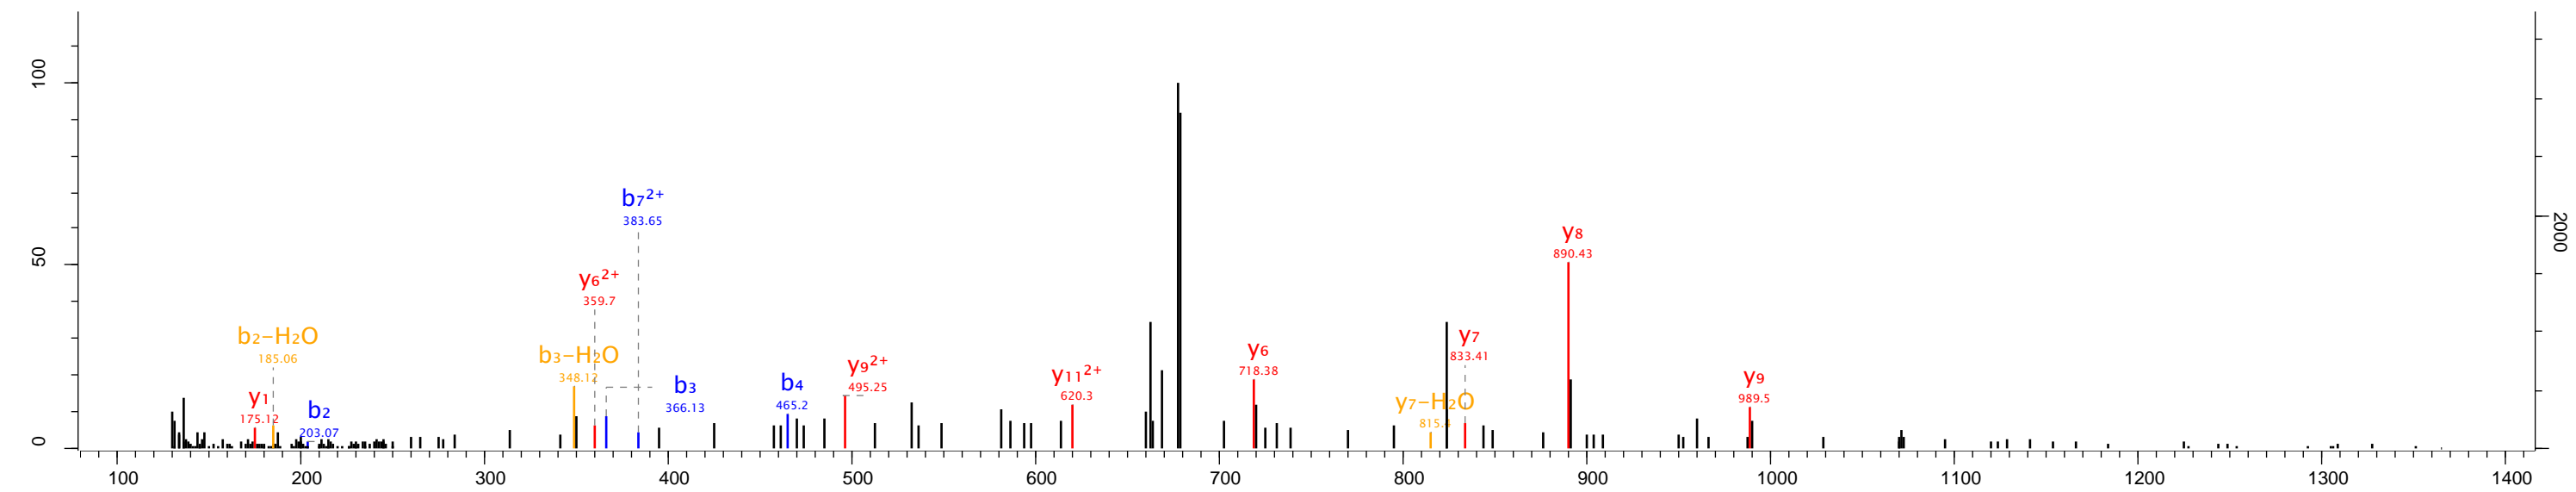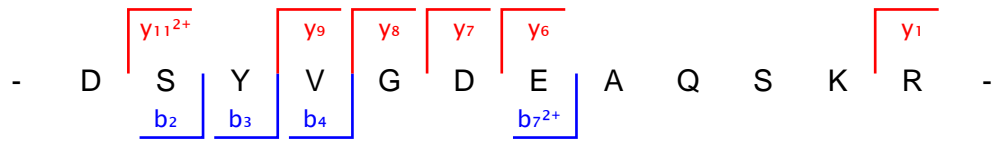

Spectral Annotation for Single-Peptide IDs between Single D11 Cells using Q-OT-LIT

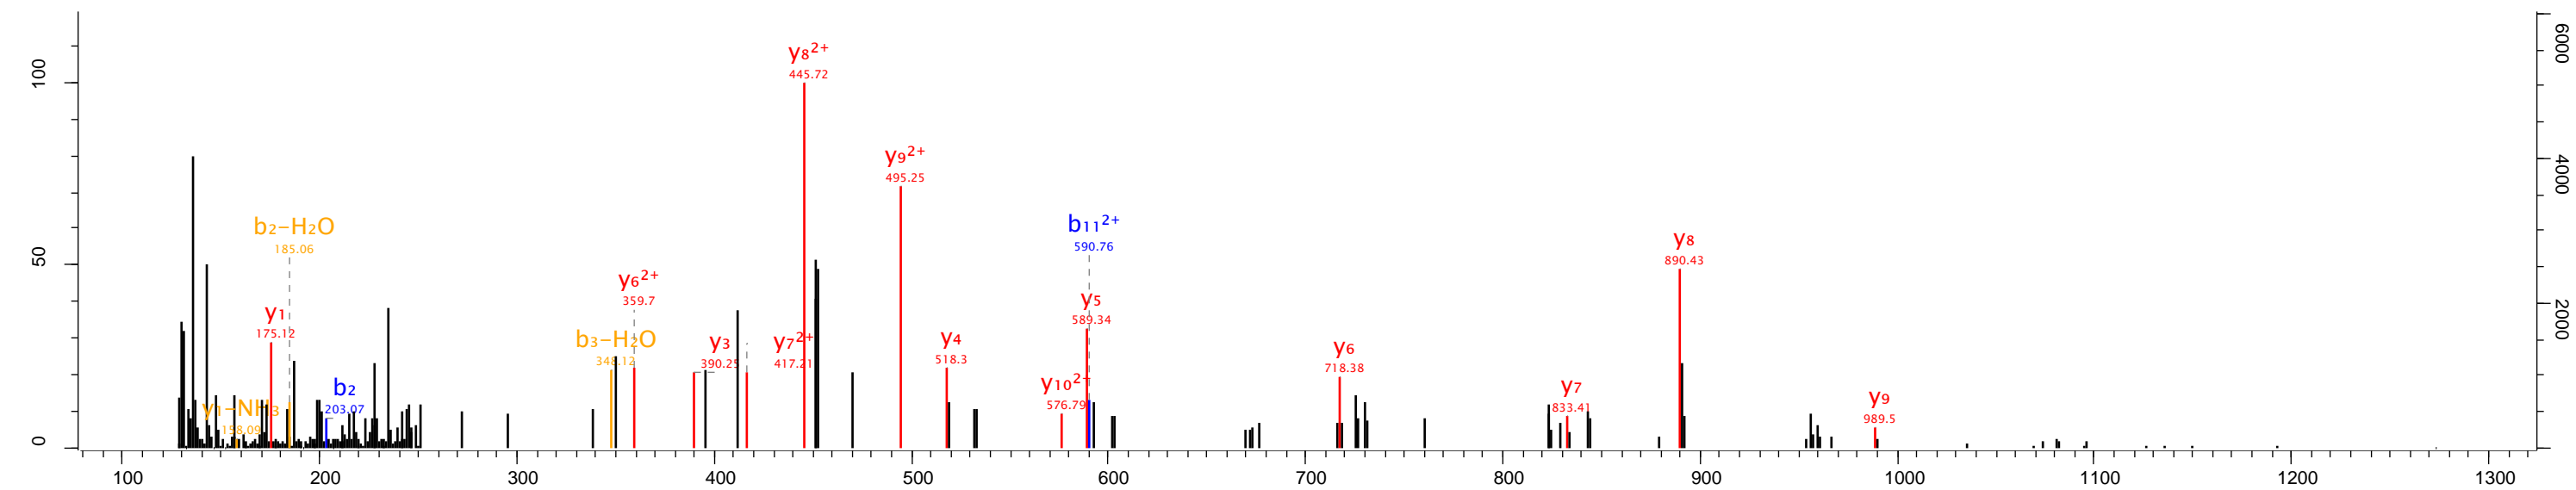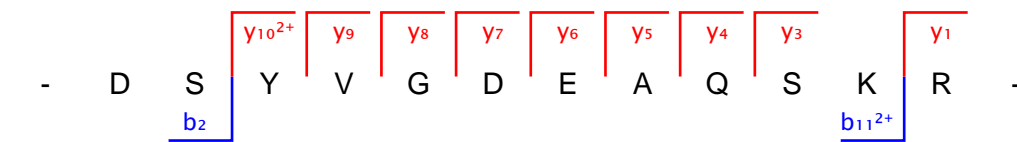

Raw file 2015-01-08\_CL03\_Blastomere-15 Scan 28892 Method ITMS; HCD Score 44.43 m/z 452.21

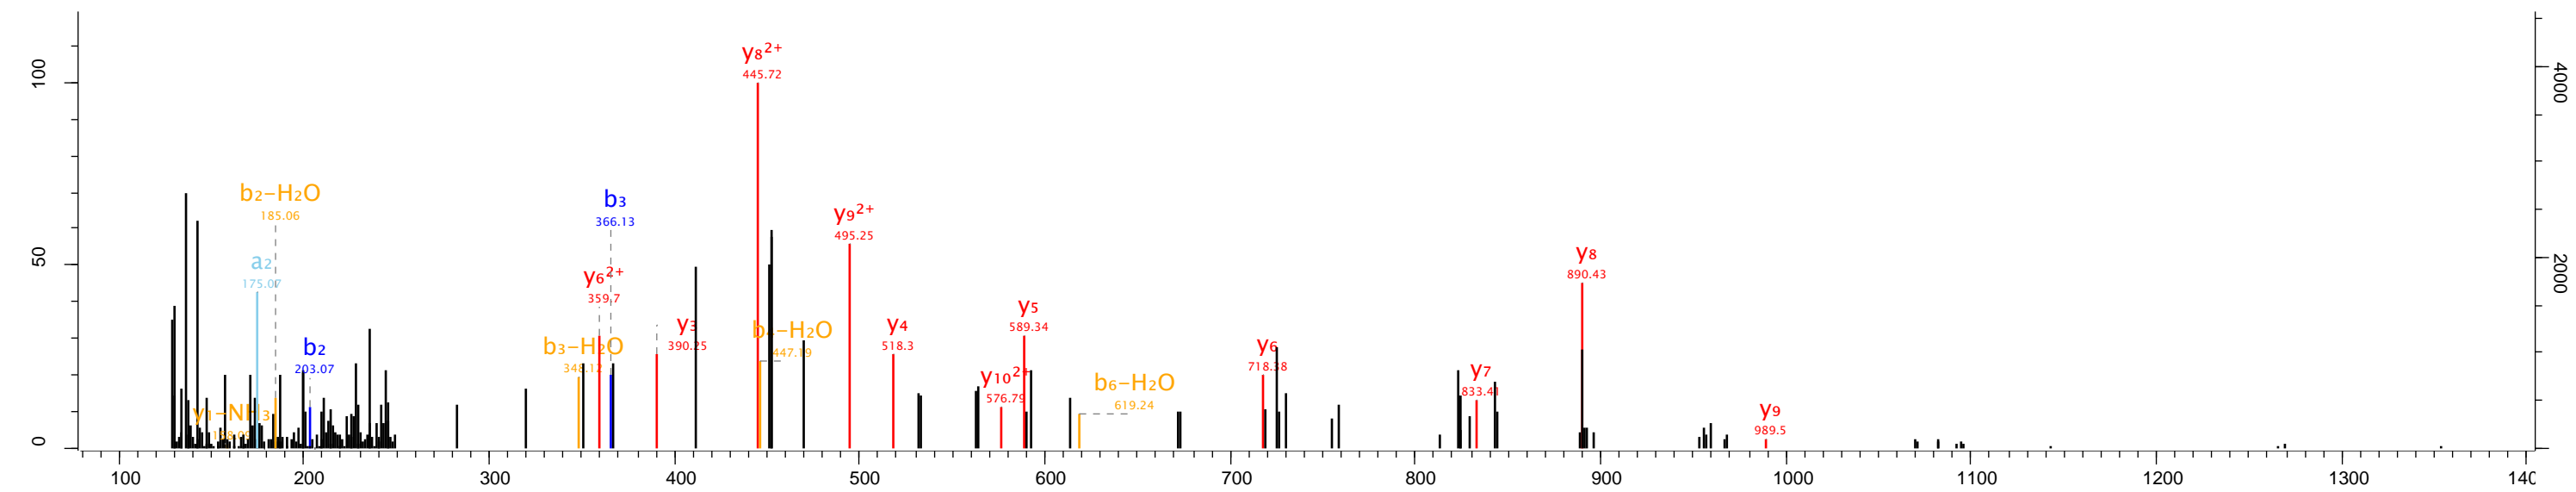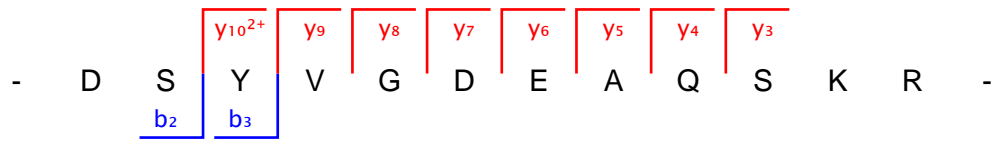

Spectral Annotation for Single-Peptide IDs between Single D11 Cells using Q-OT-LIT

Raw file 2015-01-08\_CL03\_Blastomere-15 Scan 28928 Method ITMS; HCD Score 68.54 m/z 451.26

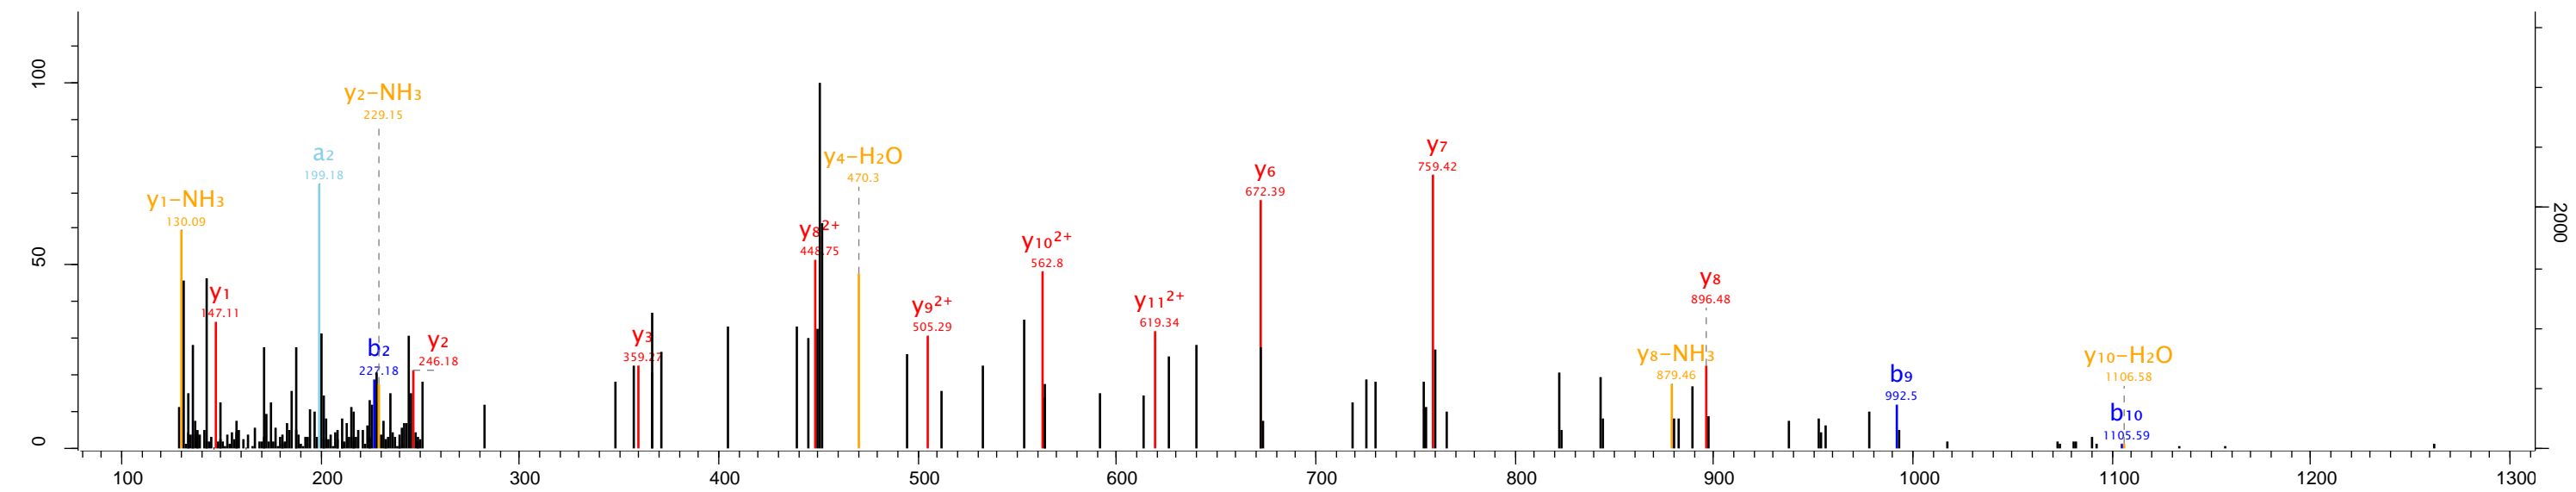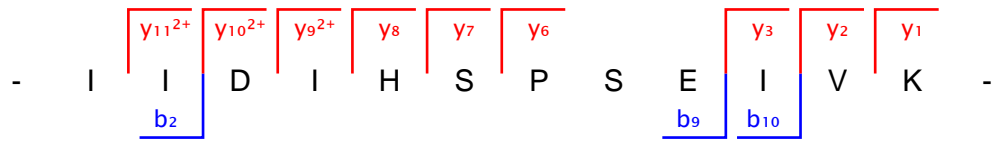

Spectral Annotation for Single-Peptide IDs between Single D11 Cells using Q-OT-LIT



Raw file 2015-01-08\_CL03\_Blastomere-15 Scan 28941 Method ITMS; HCD Score 48.38 m/z 747.41

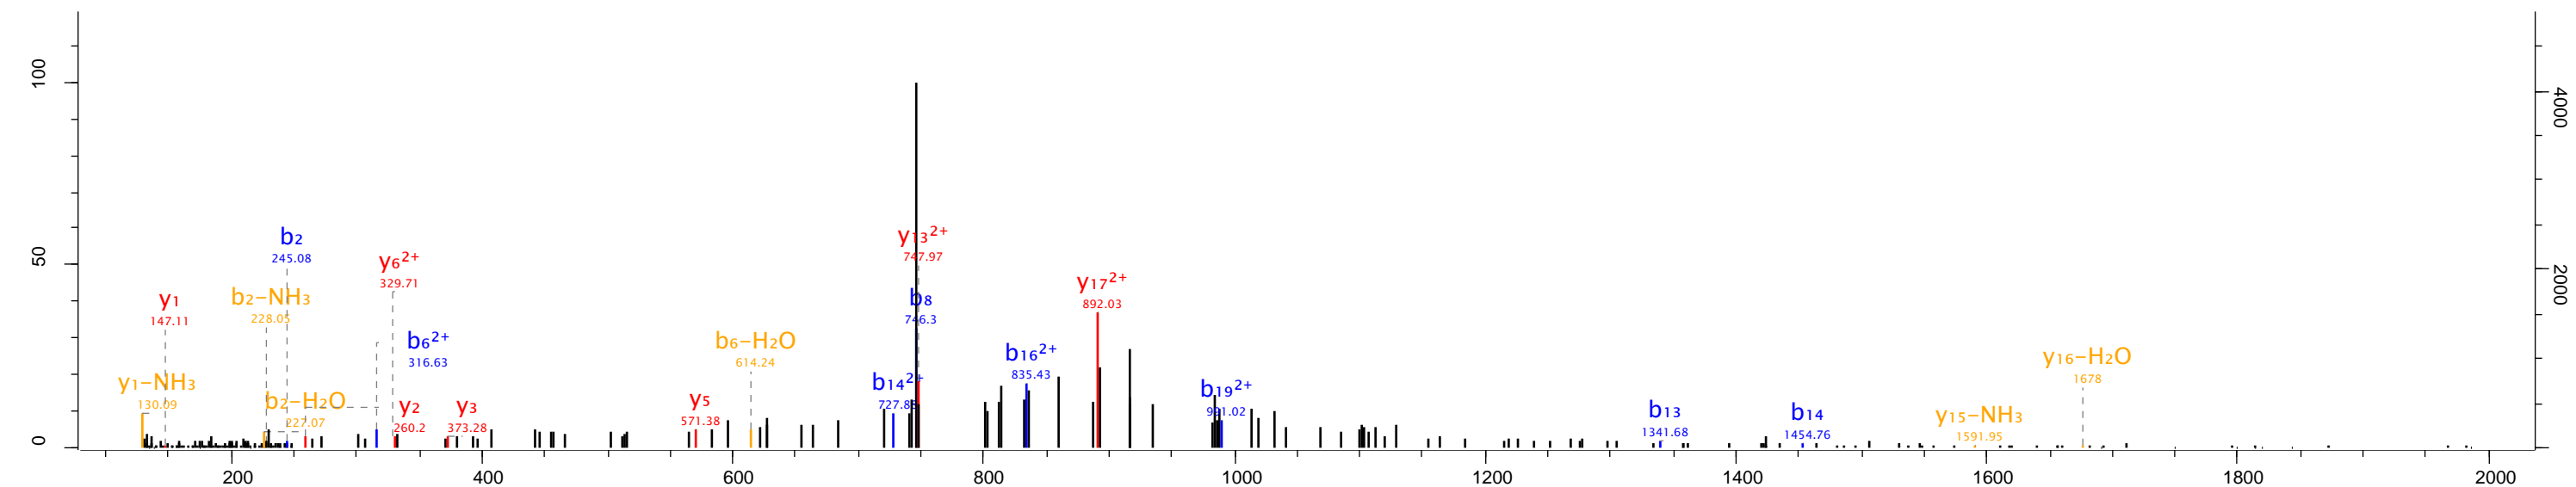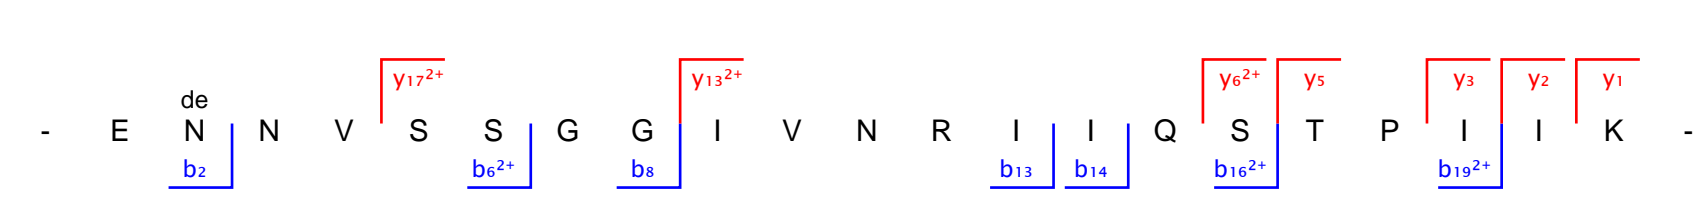

Spectral Annotation for Single-Peptide IDs between Single D11 Cells using Q-OT-LIT

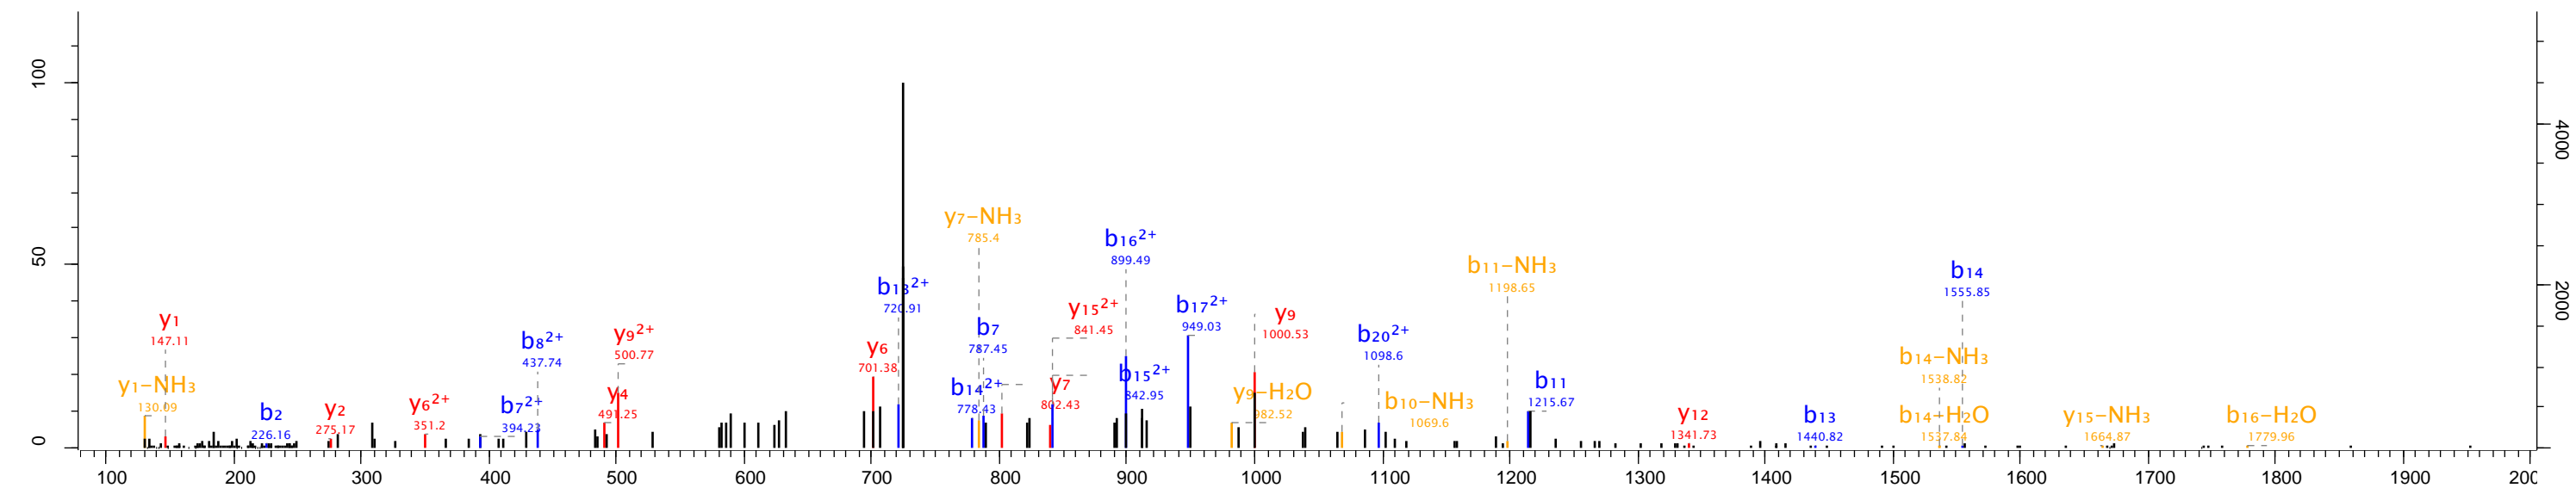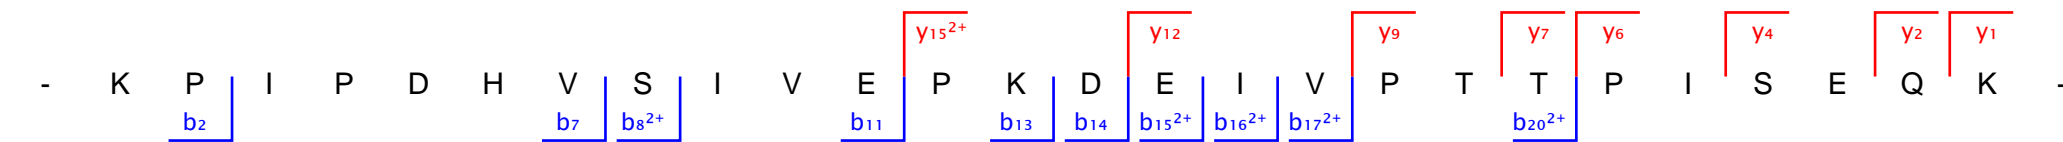

Raw file 2015-01-08\_CL03\_Blastomere-15 Scan 29168 Method ITMS; HCD Score 75.79 m/z 452.21

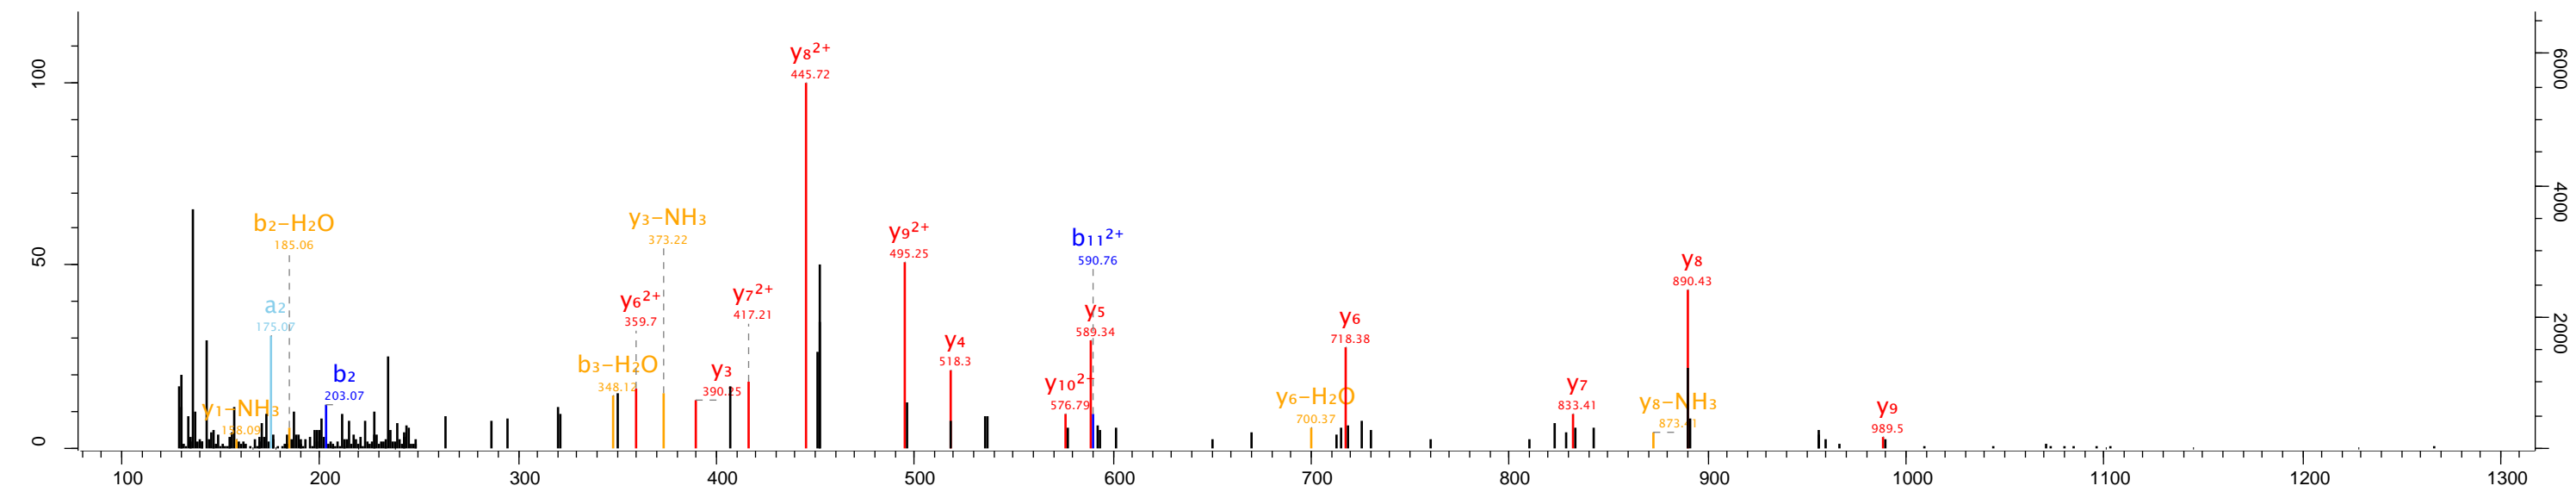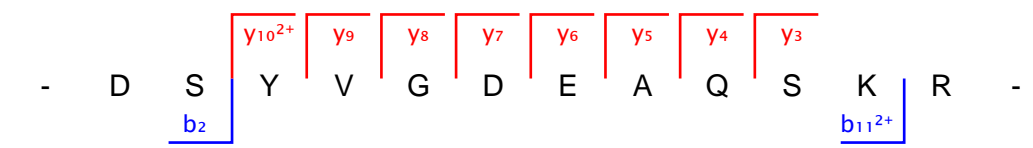

Spectral Annotation for Single-Peptide IDs between Single D11 Cells using Q-OT-LIT

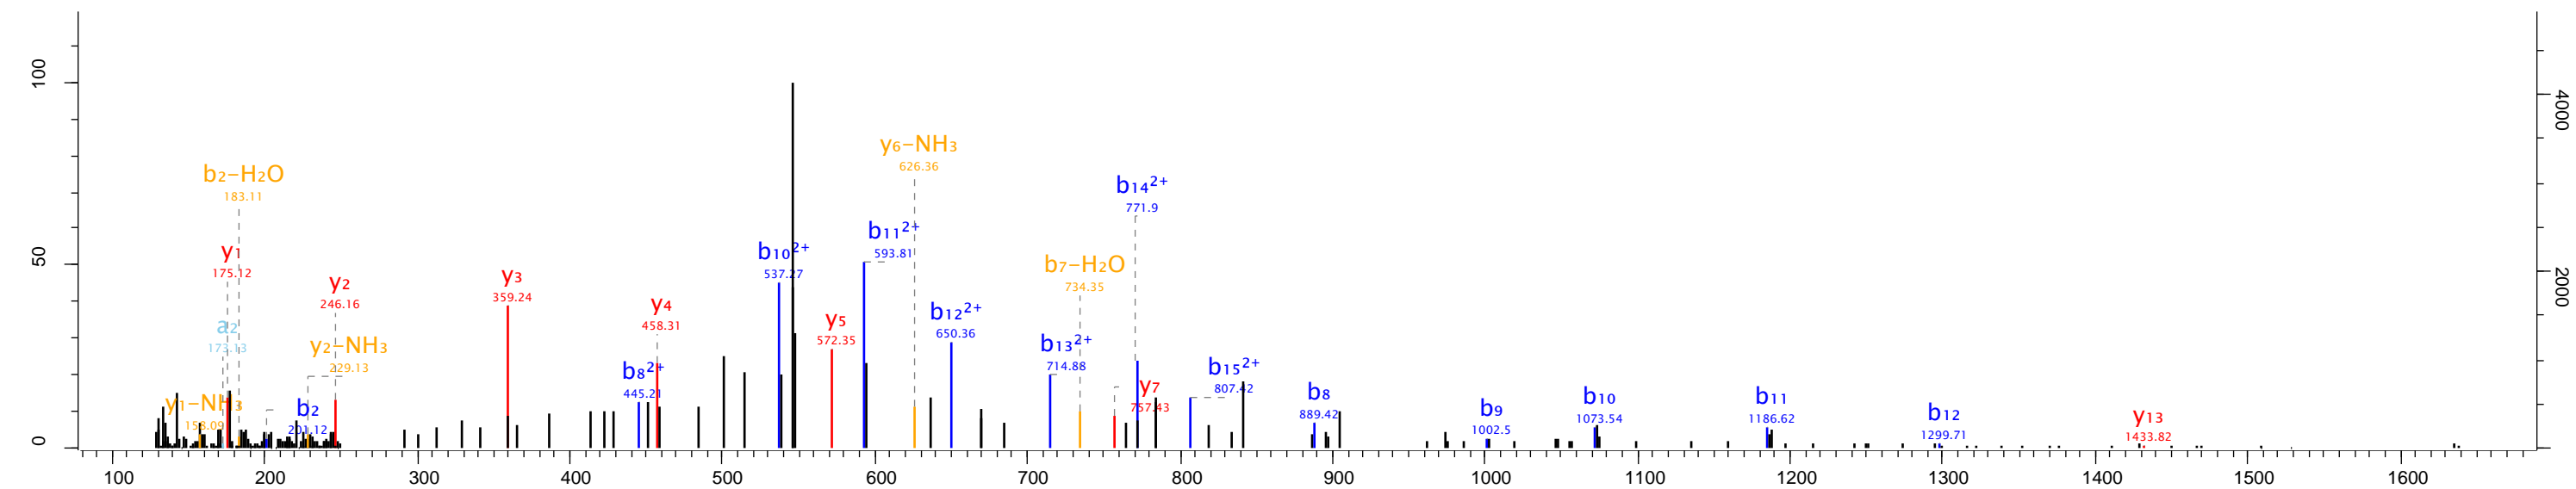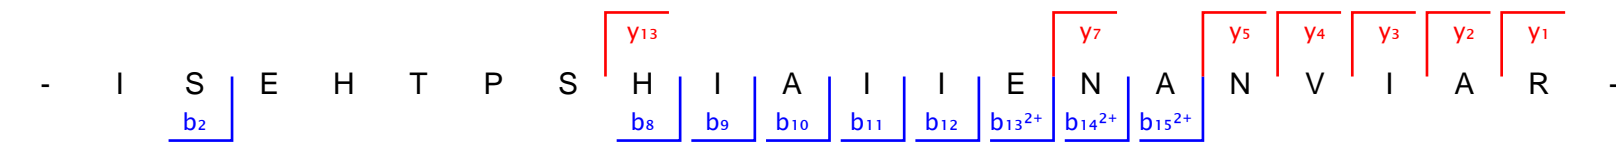

Raw file 2015-01-08\_CL03\_Blastomere-15 Scan 29319 Method ITMS; HCD Score 66.07 m/z 547.05

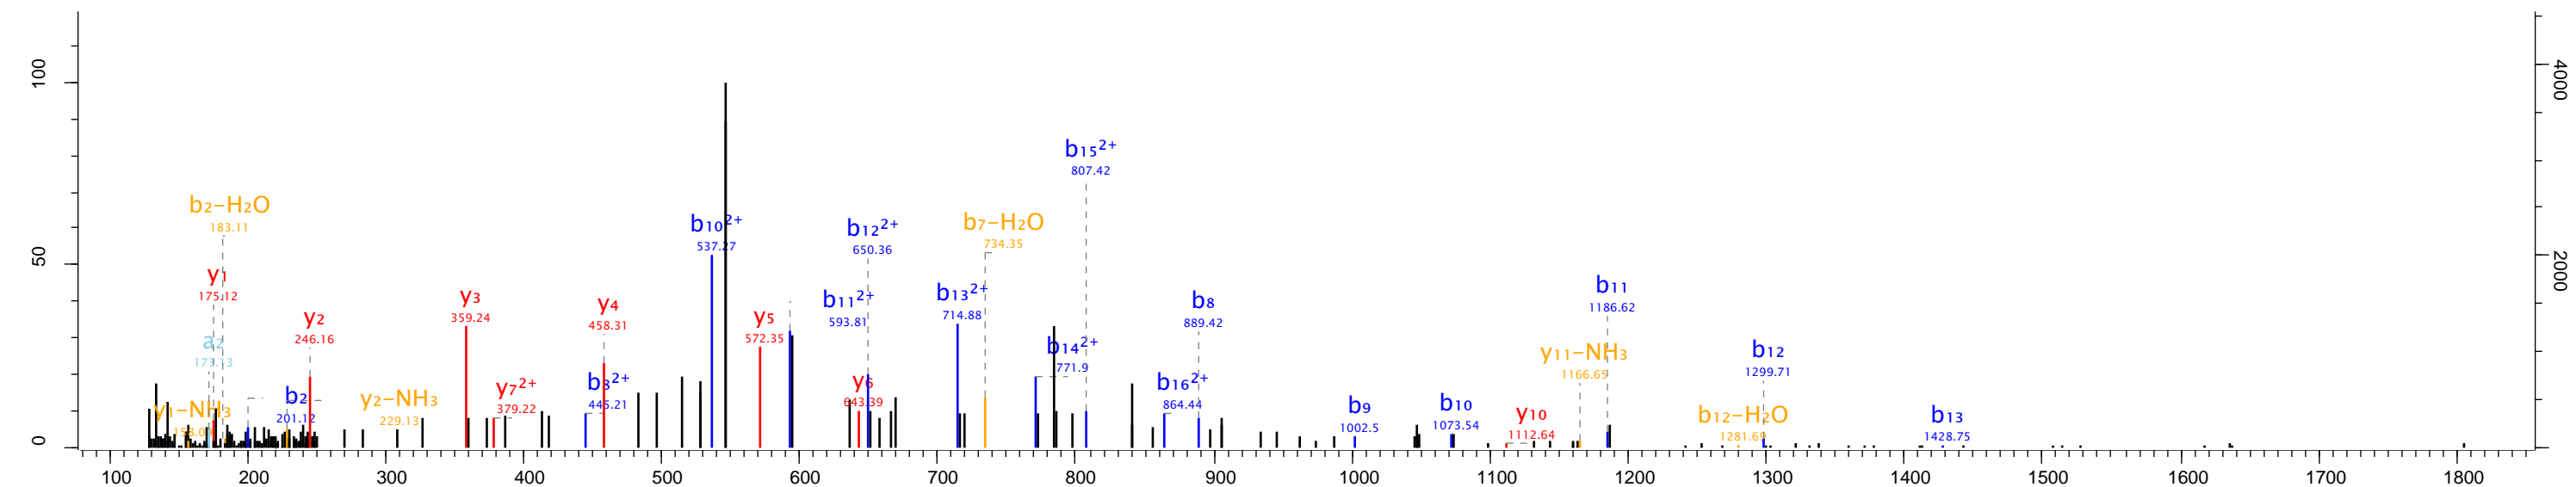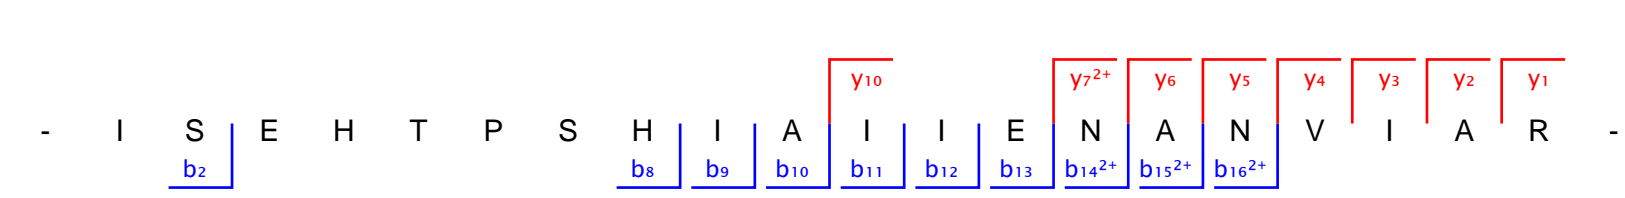

Raw file 2015-01-08\_CL03\_Blastomere-15 Scan 29399 Method ITMS; HCD Score 39.9 m/z 729.39

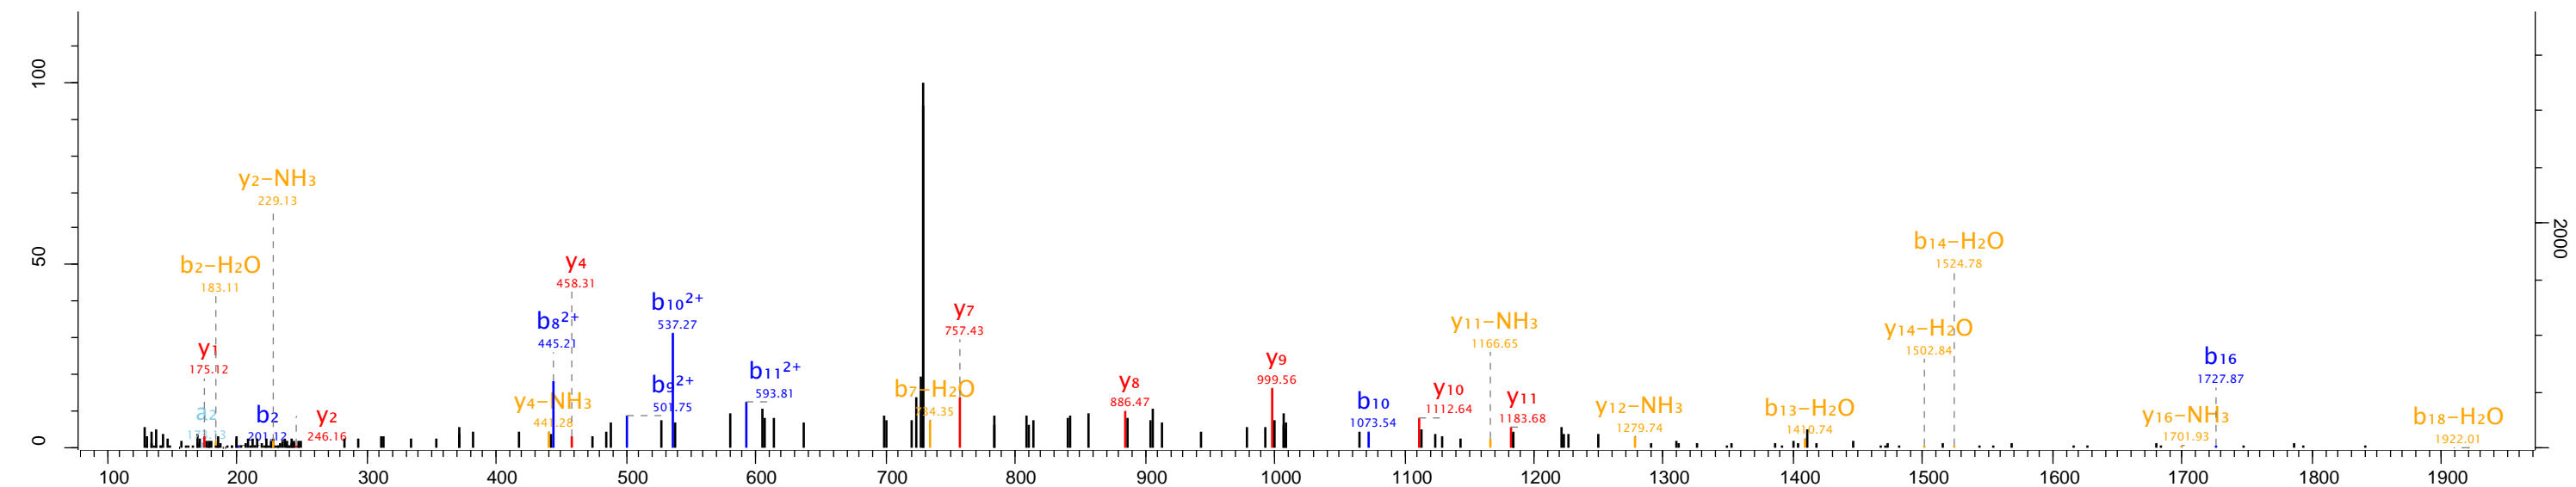

- I S E H T P S H I A I I E N A N V I A R -

Fragmentation mapping: b2 (S), b8<sup>2+</sup> (SH), b9<sup>2+</sup> (SHI), b10 (SHIA), b11<sup>2+</sup> (SHIAI), b16 (NVIA), y1 (I), y2 (IA), y4 (IV), y7 (IEN), y8 (IE), y9 (IIE), y10 (IAI), y11 (IAI), y11-NH3 (IAI), y12-NH3 (IAN), y14-H2O (IANV), y16-NH3 (IANVI), y1 (IAR).

Raw file 2015-01-08\_CL03\_Blastomere-15 Scan 29591 Method ITMS; HCD Score 84.73 m/z 564.97

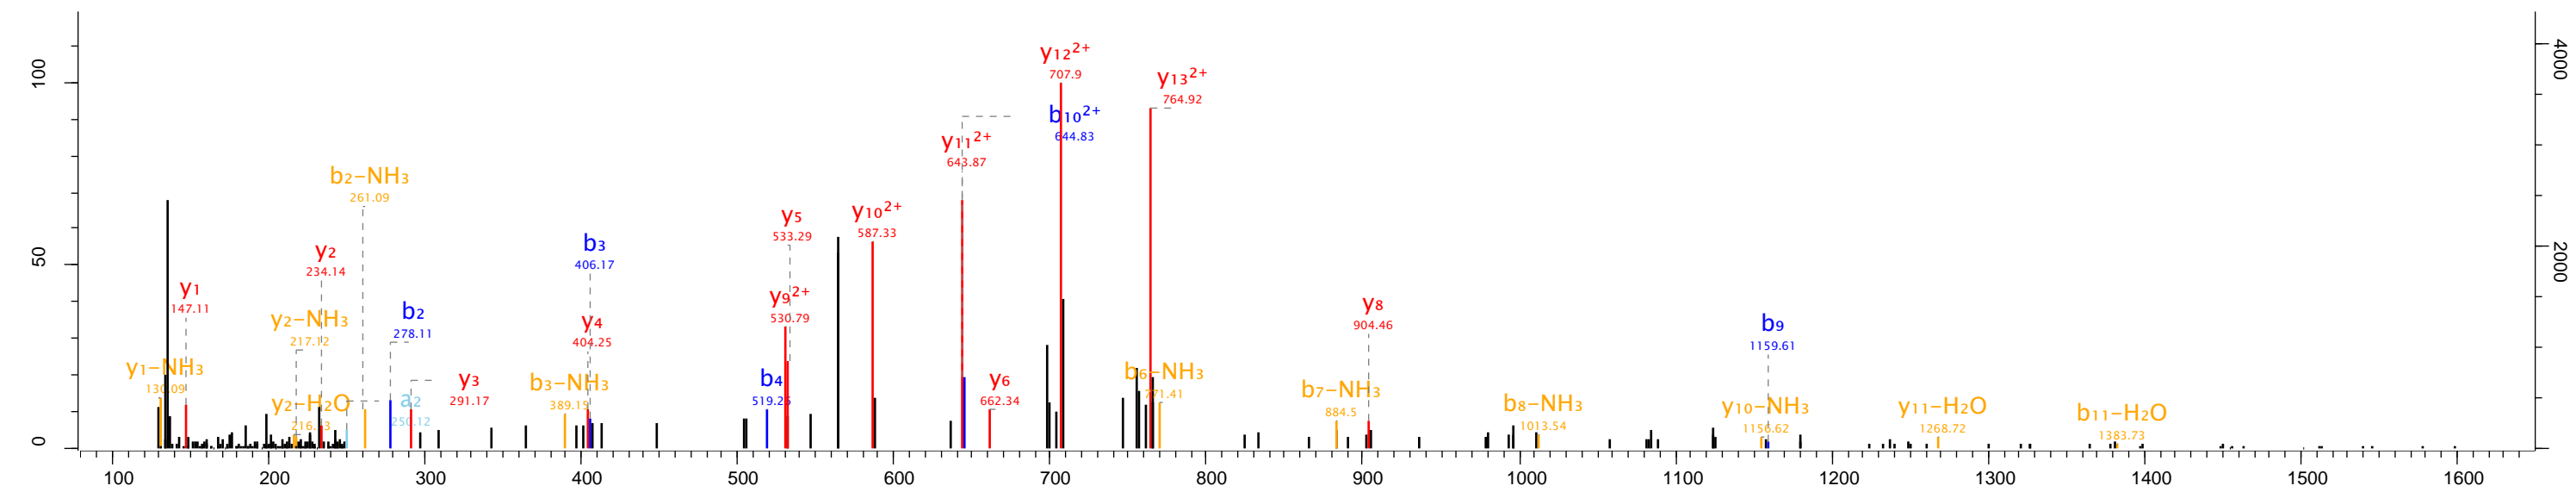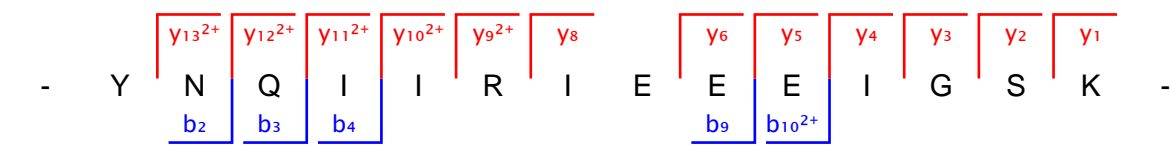

Spectral Annotation for Single-Peptide IDs between Single D11 Cells using Q-OT-LIT

Raw file 2015-01-08\_CL03\_Blastomere-15 Scan 29610 Method ITMS; HCD Score 69.11 m/z 547.3

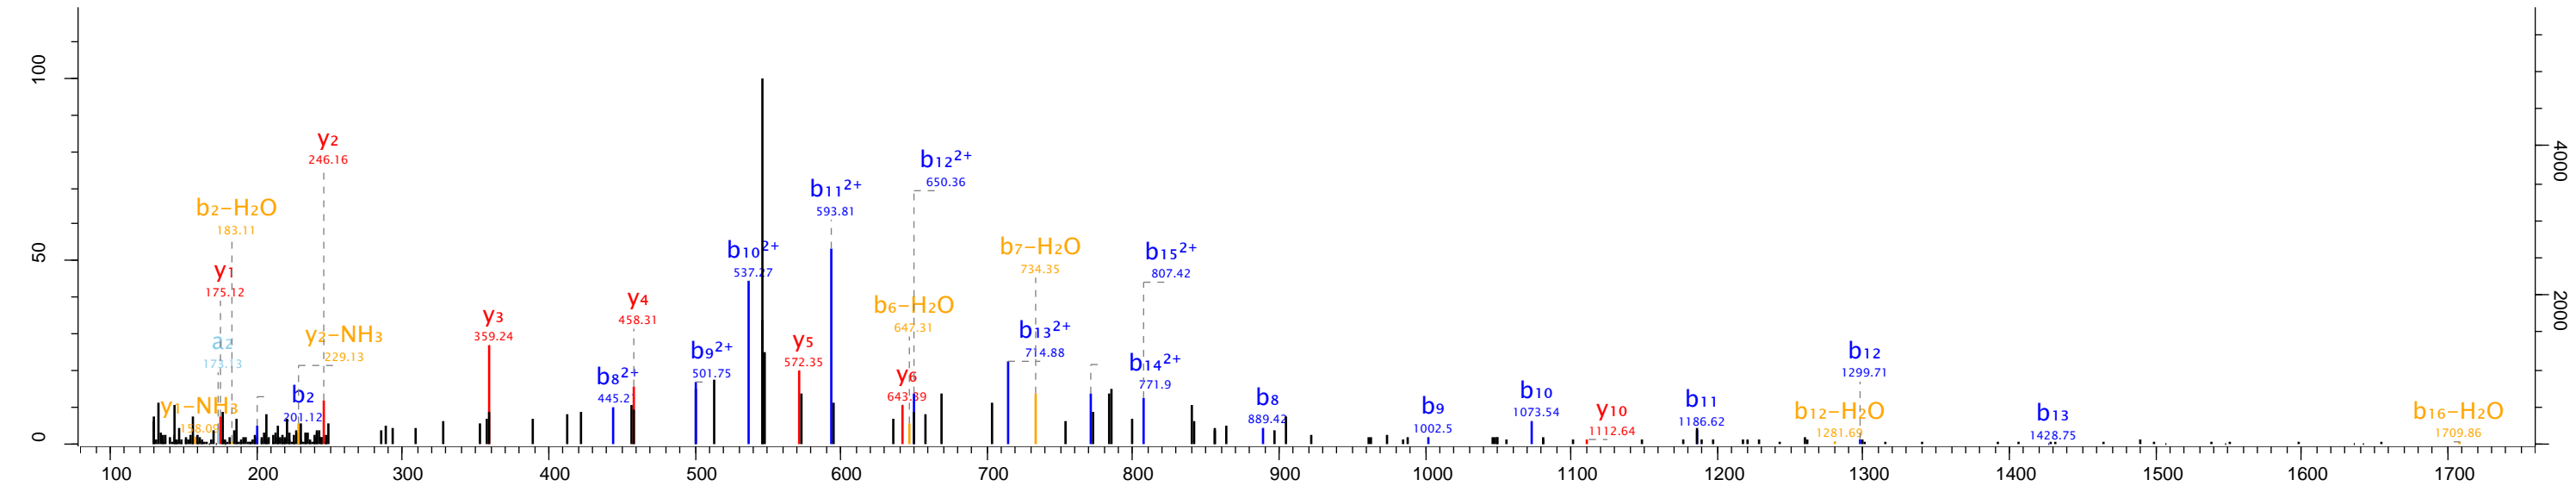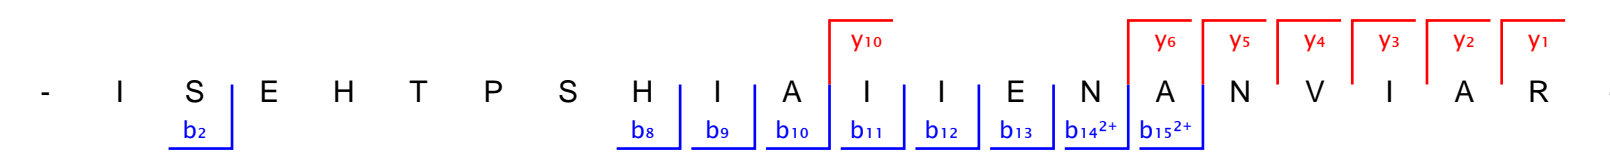

Spectral Annotation for Single-Peptide IDs between Single D11 Cells using Q-OT-LIT



Raw file: 2015-01-08\_CL03\_Blastomere-15  
 Scan: 29684 Method: ITMS; HCD Score: 39.35 m/z: 729.4

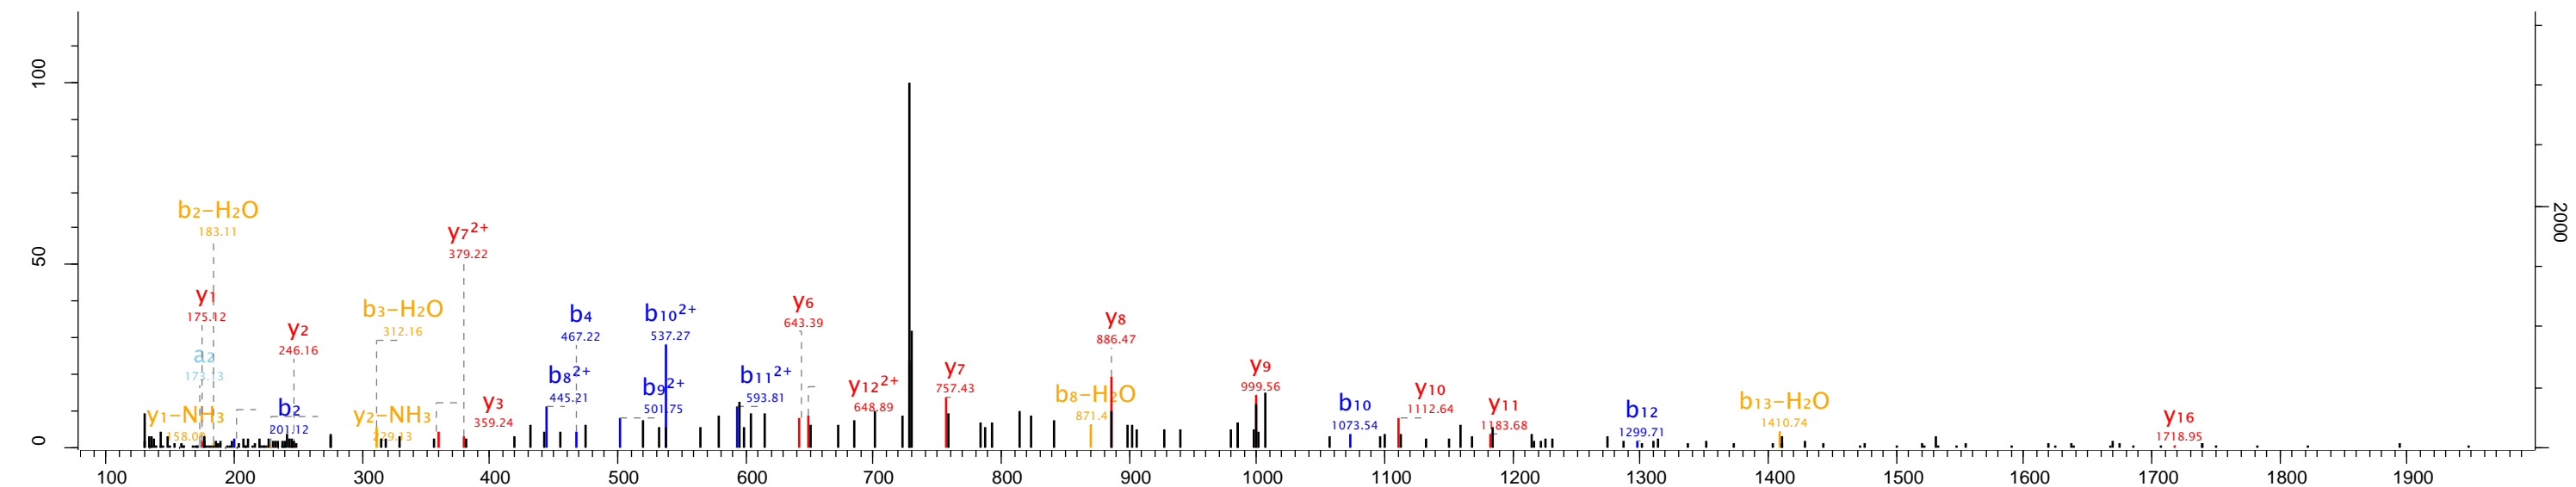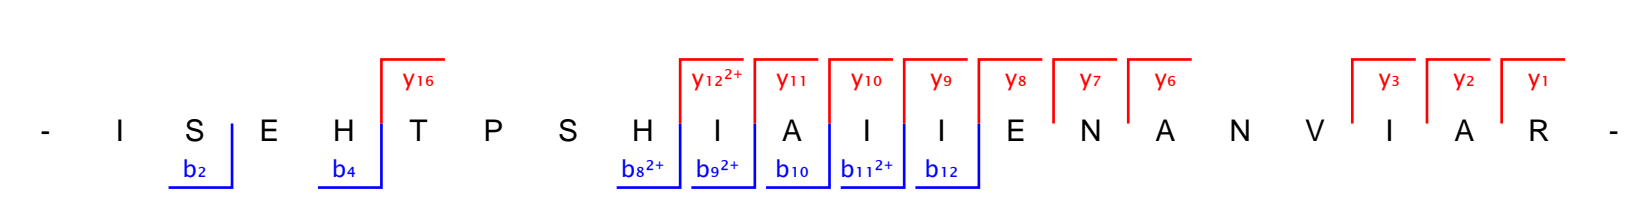

Spectral Annotation for Single-Peptide IDs between Single D11 Cells using Q-OT-LIT

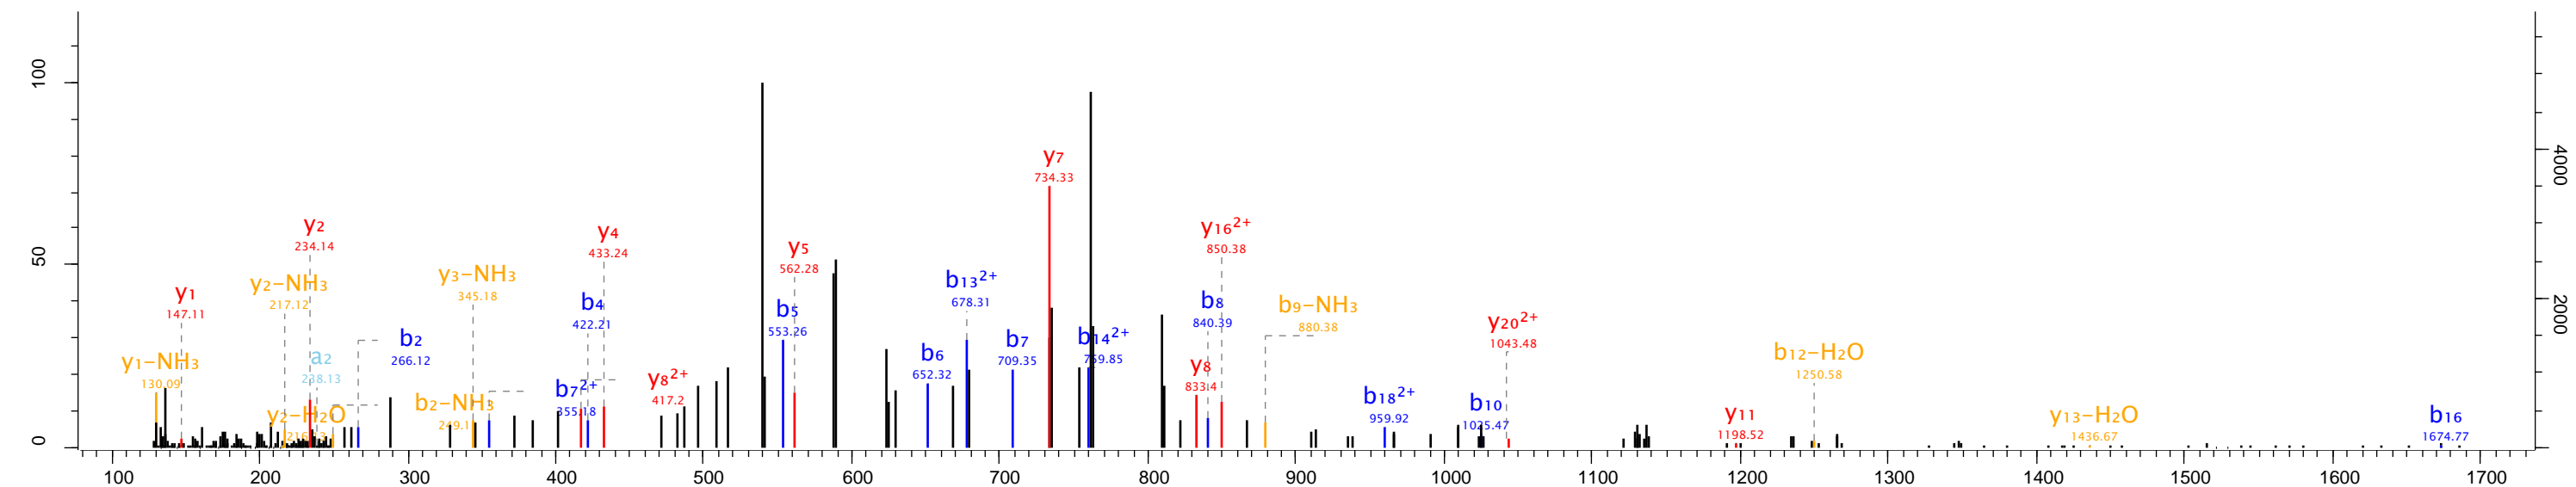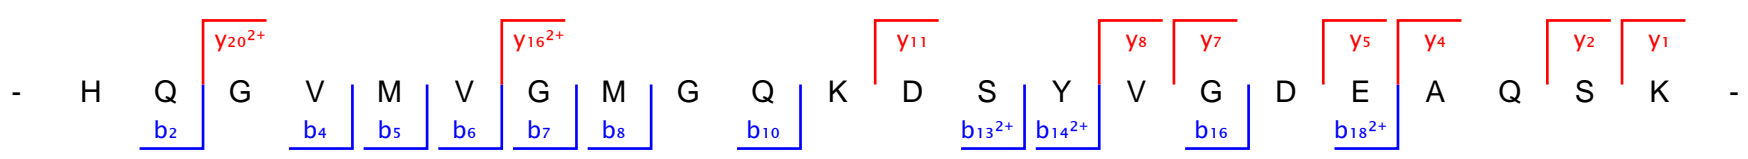



Raw file: 2015-01-08\_CL03\_Blastomere-15  
 Scan: 29775 Method: ITMS; HCD Score: 68.17 m/z: 517.94

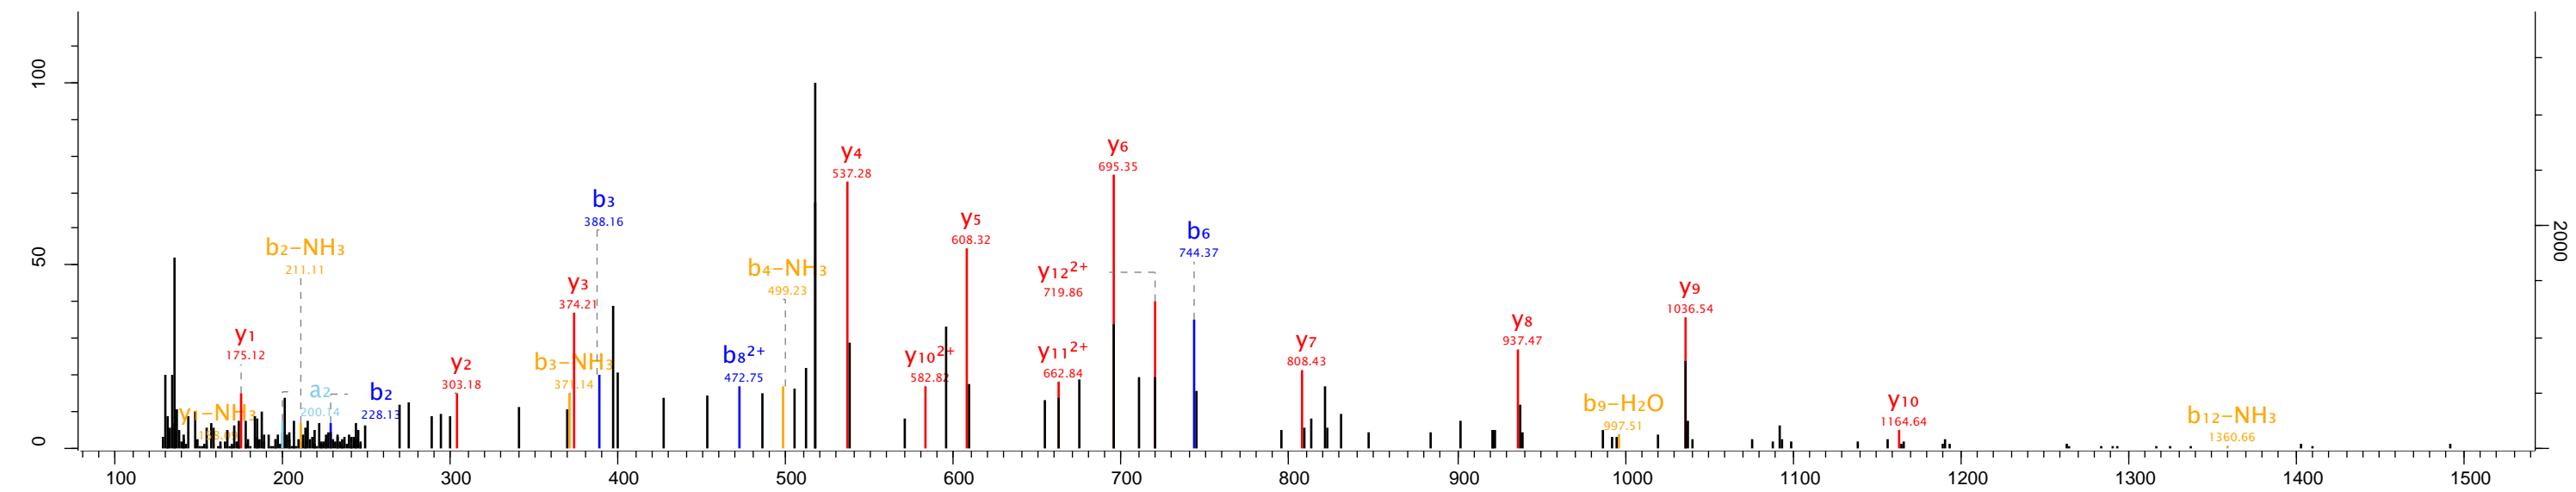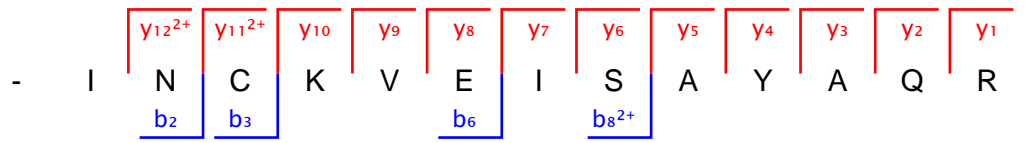

Spectral Annotation for Single-Peptide IDs between Single D11 Cells using Q-OT-LIT

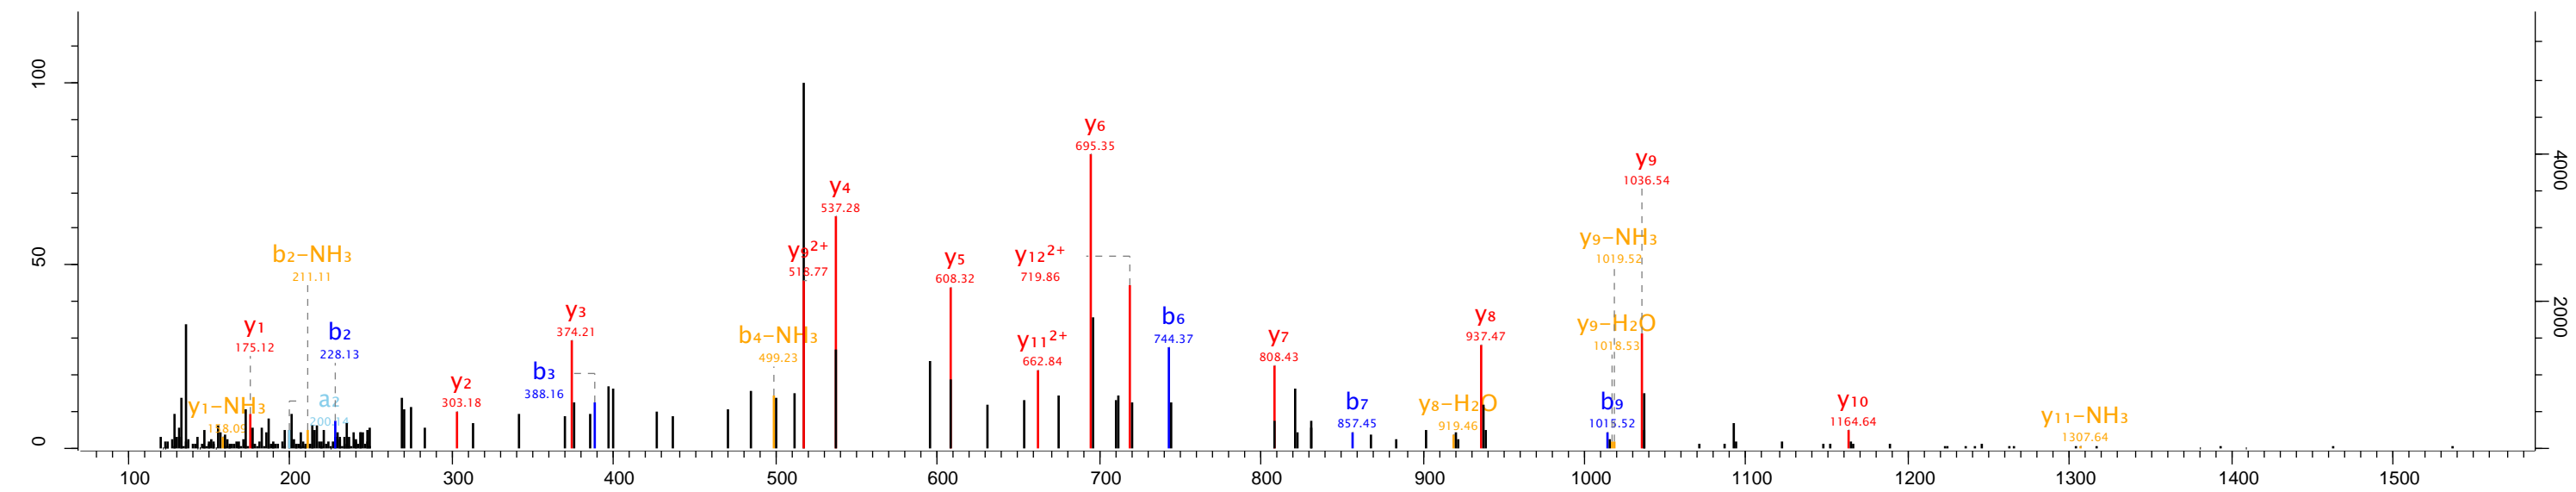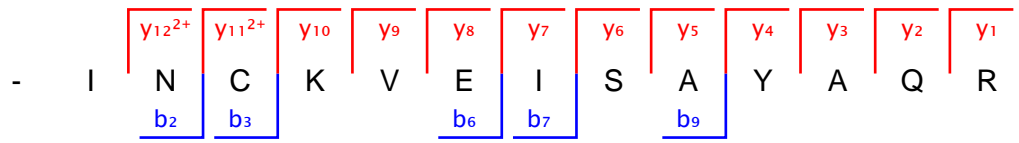

Raw file 2015-01-08\_CL03\_Blastomere-15 Scan 29809 Method ITMS; HCD Score 73.39 m/z 517.94

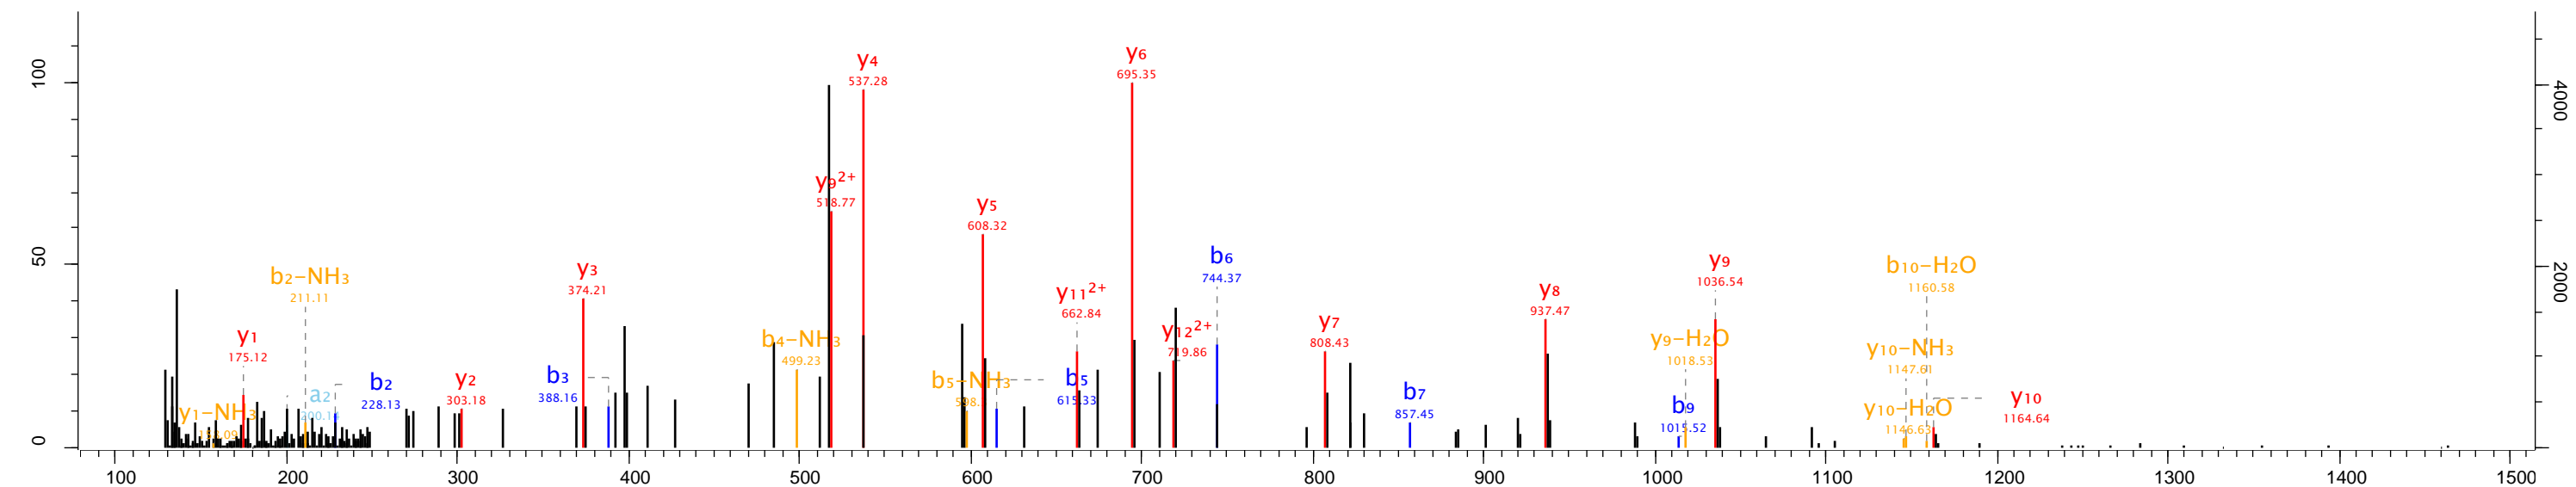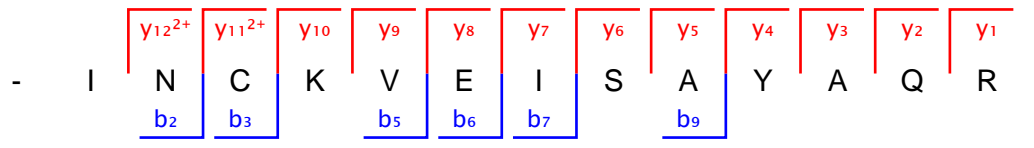

Spectral Annotation for Single-Peptide IDs between Single D11 Cells using Q-OT-LIT

Raw file 2015-01-08\_CL03\_Blastomere-15 Scan 29832 Method ITMS; HCD Score 68.97 m/z 517.93

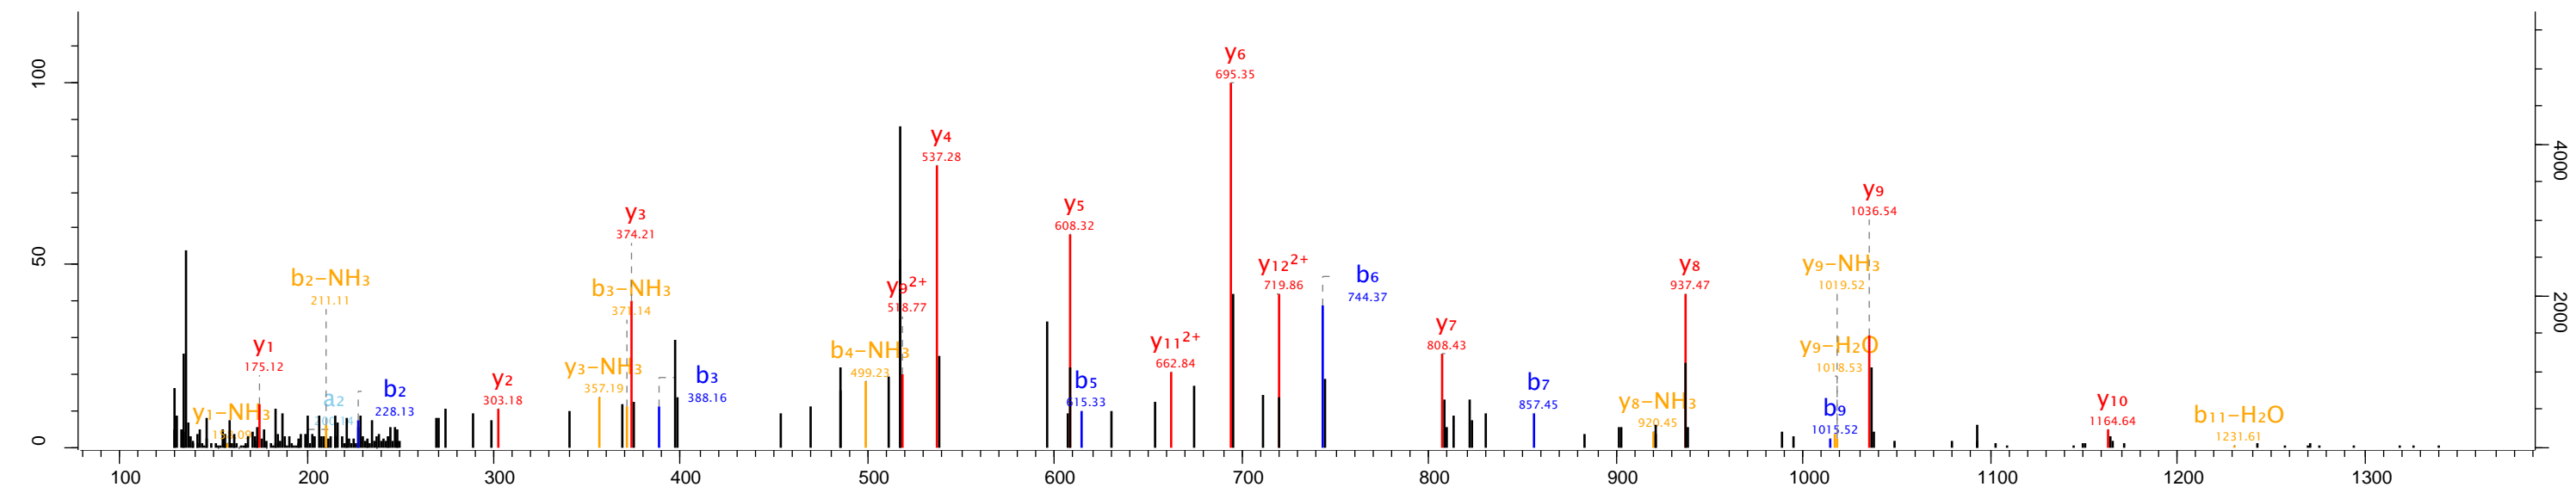

Spectral Annotation for Single-Peptide IDs between Single D11 Cells using Q-OT-LIT

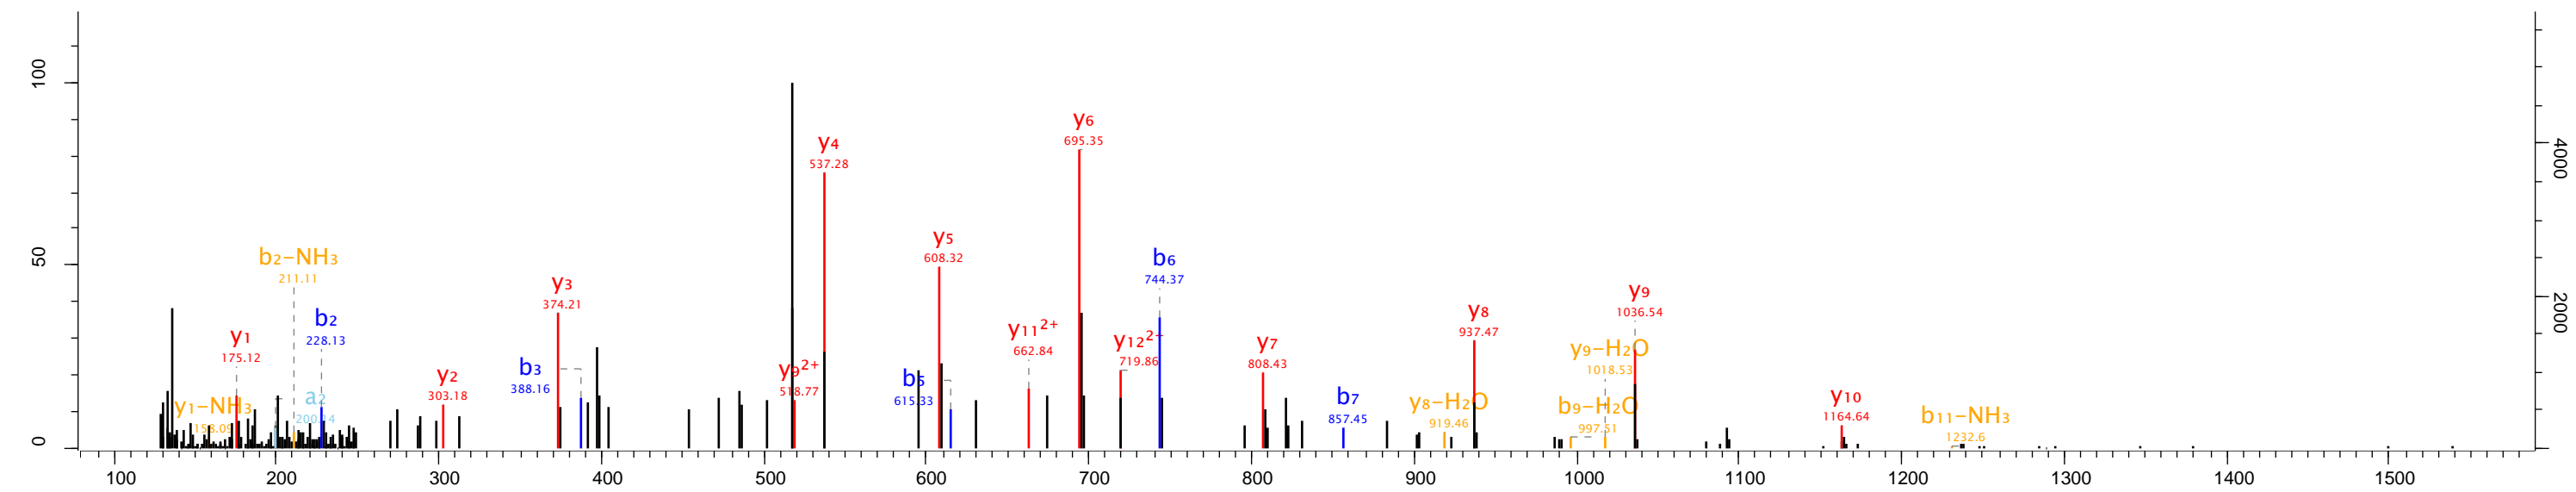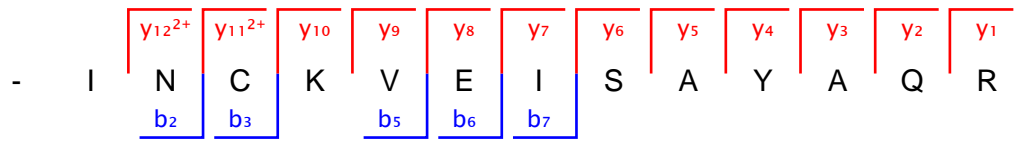



Raw file Scan Method Score m/z  
 2015-01-08\_CL03\_Blastomere-15 29877 ITMS; HCD 49.92 567.26

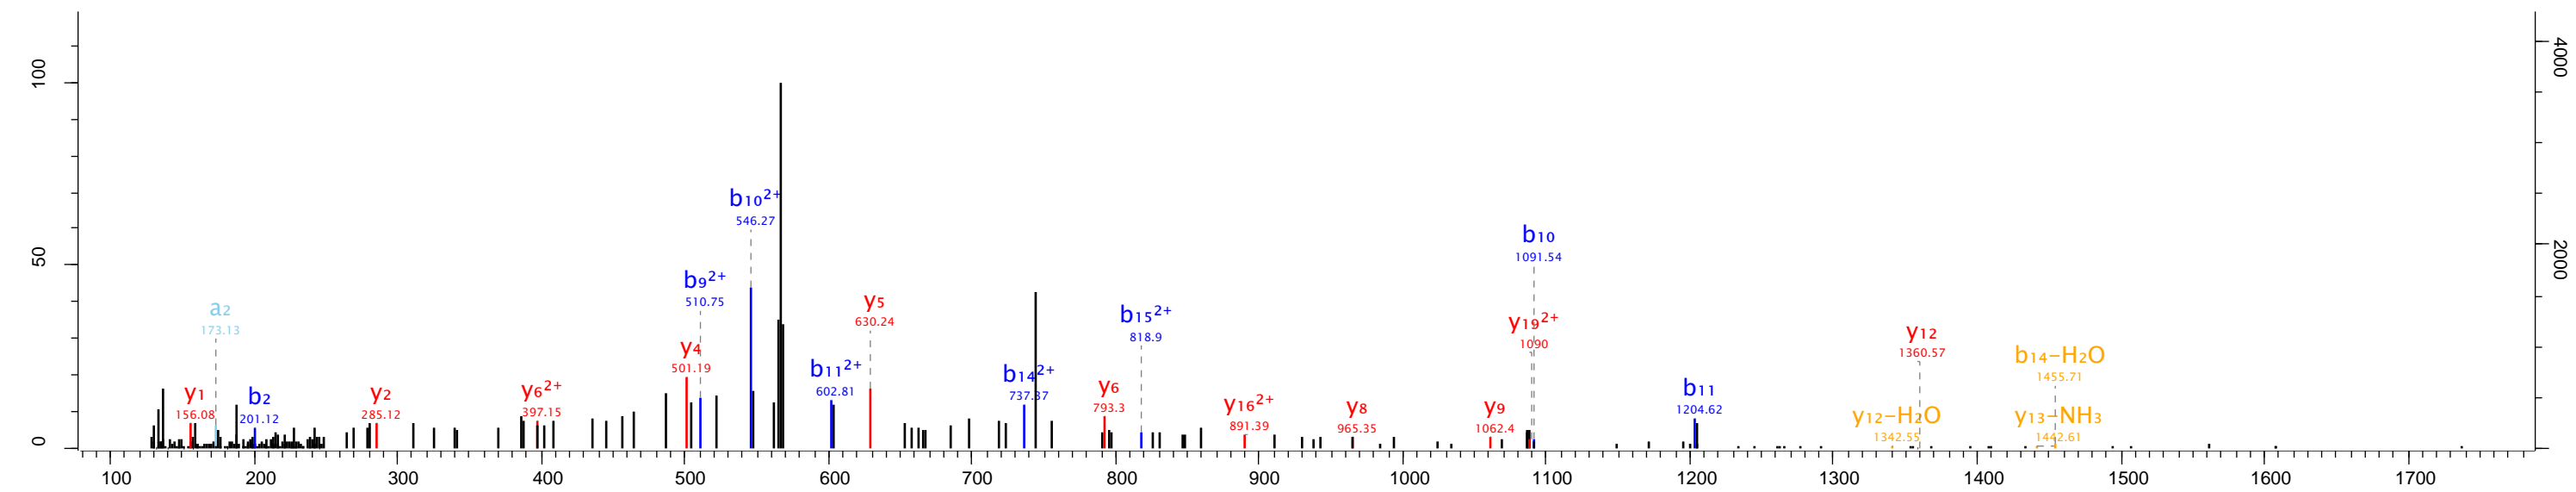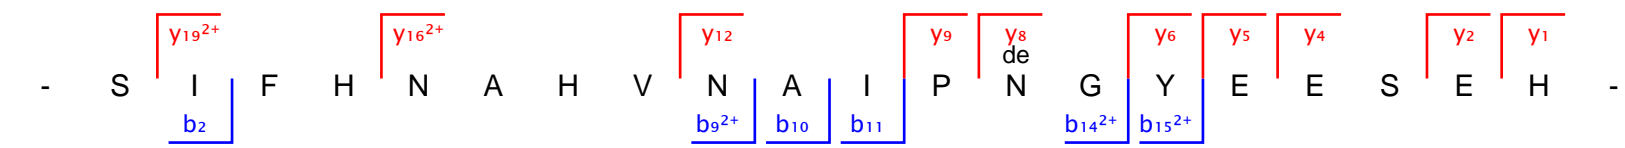

Spectral Annotation for Single-Peptide IDs between Single D11 Cells using Q-OT-LIT

Raw file 2015-01-08\_CL03\_Blastomere-15 Scan 29887 Method ITMS; HCD Score 81.9 m/z 496.94

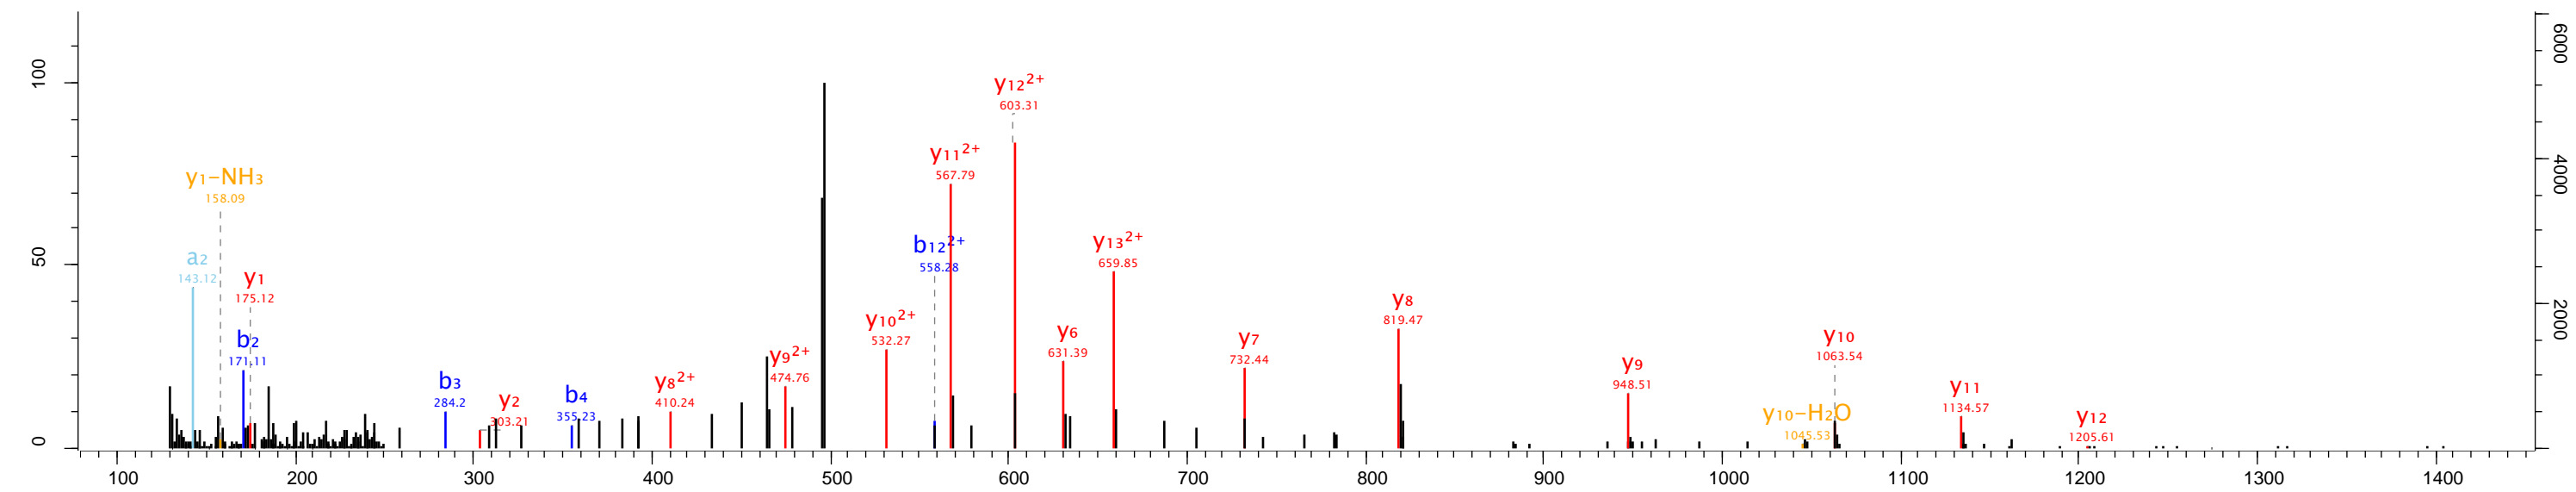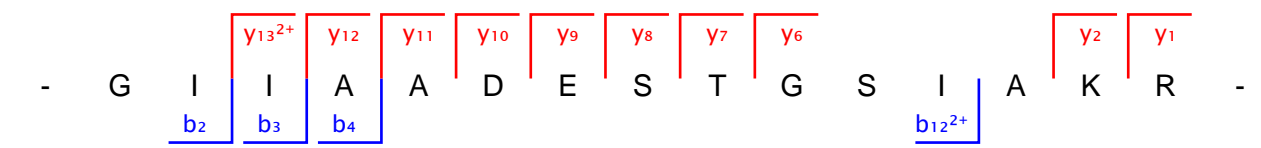

Spectral Annotation for Single-Peptide IDs between Single D11 Cells using Q-OT-LIT

Raw file 2015-01-08\_CL03\_Blastomere-15 Scan 29907 Method ITMS; HCD Score 94.09 m/z 496.94

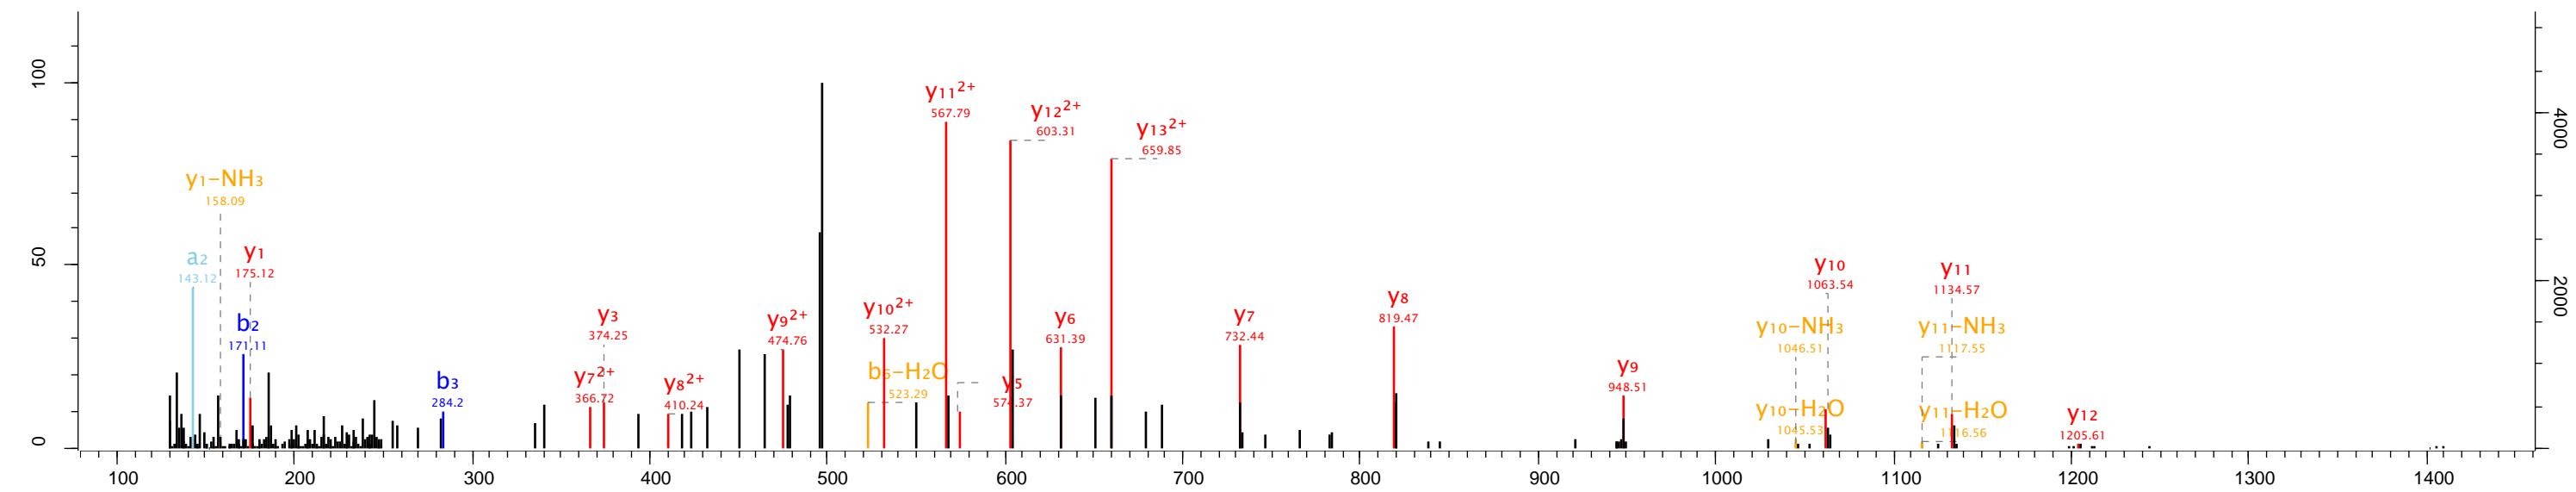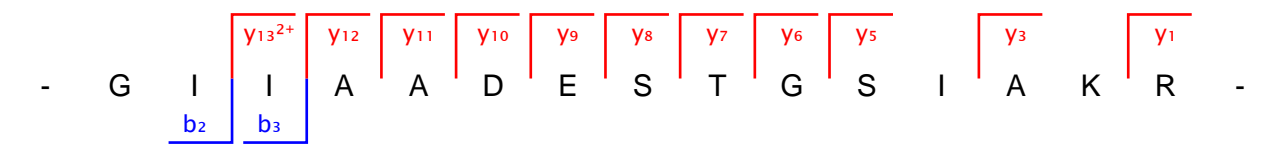

Spectral Annotation for Single-Peptide IDs between Single D11 Cells using Q-OT-LIT

Raw file 2015-01-08\_CL03\_Blastomere-15 Scan 29956 Method ITMS; HCD Score 44.19 m/z 564.64

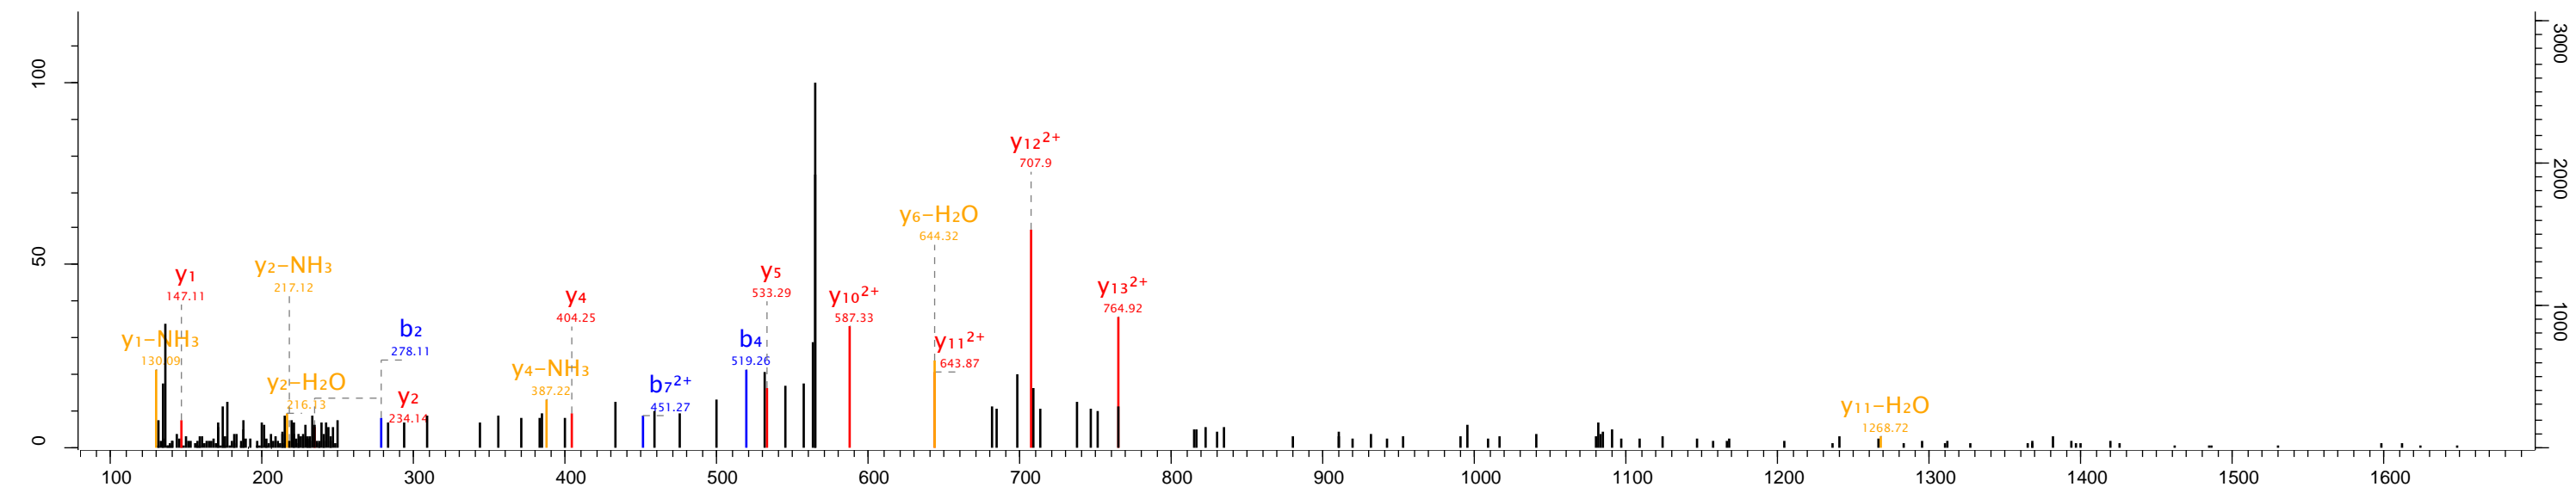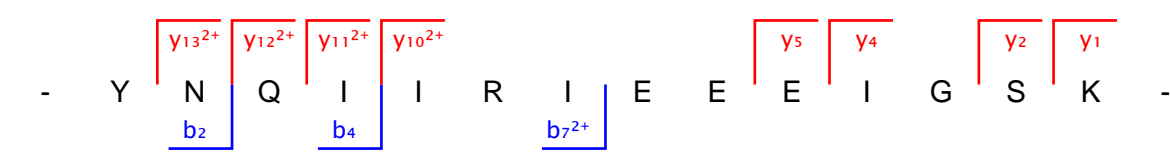

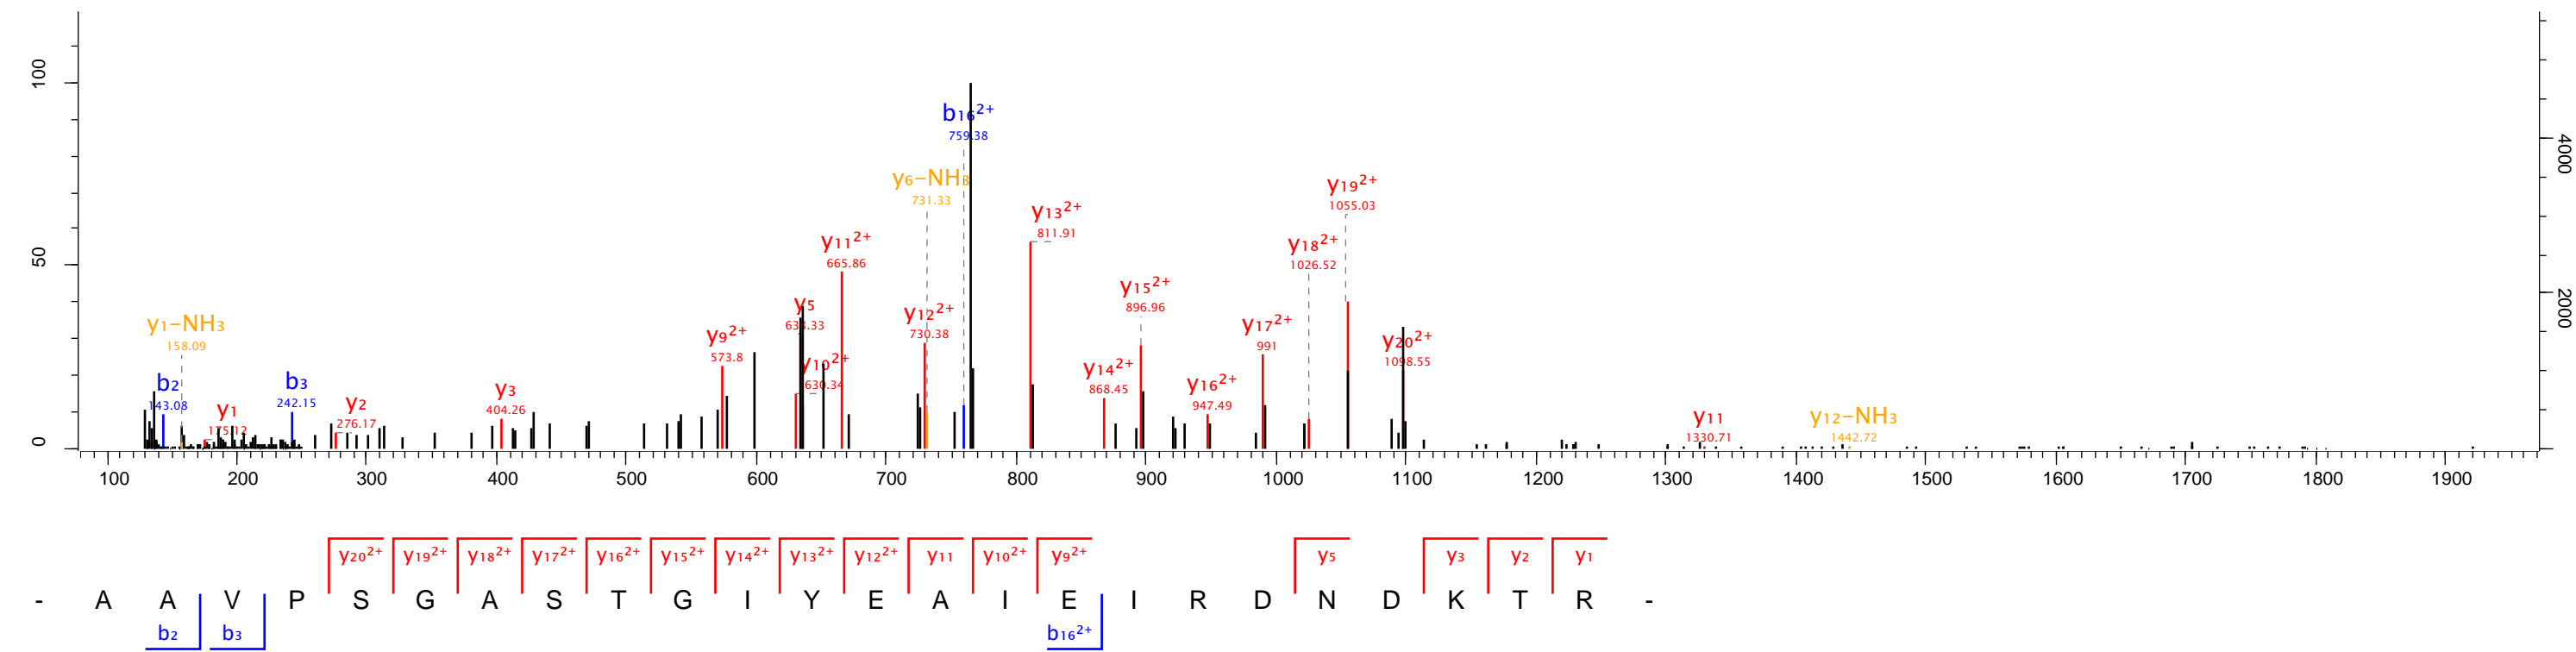

Raw file 2015-01-08\_CL03\_Blastomere-15 Scan 30032 Method ITMS; HCD Score 42.12 m/z 634.58

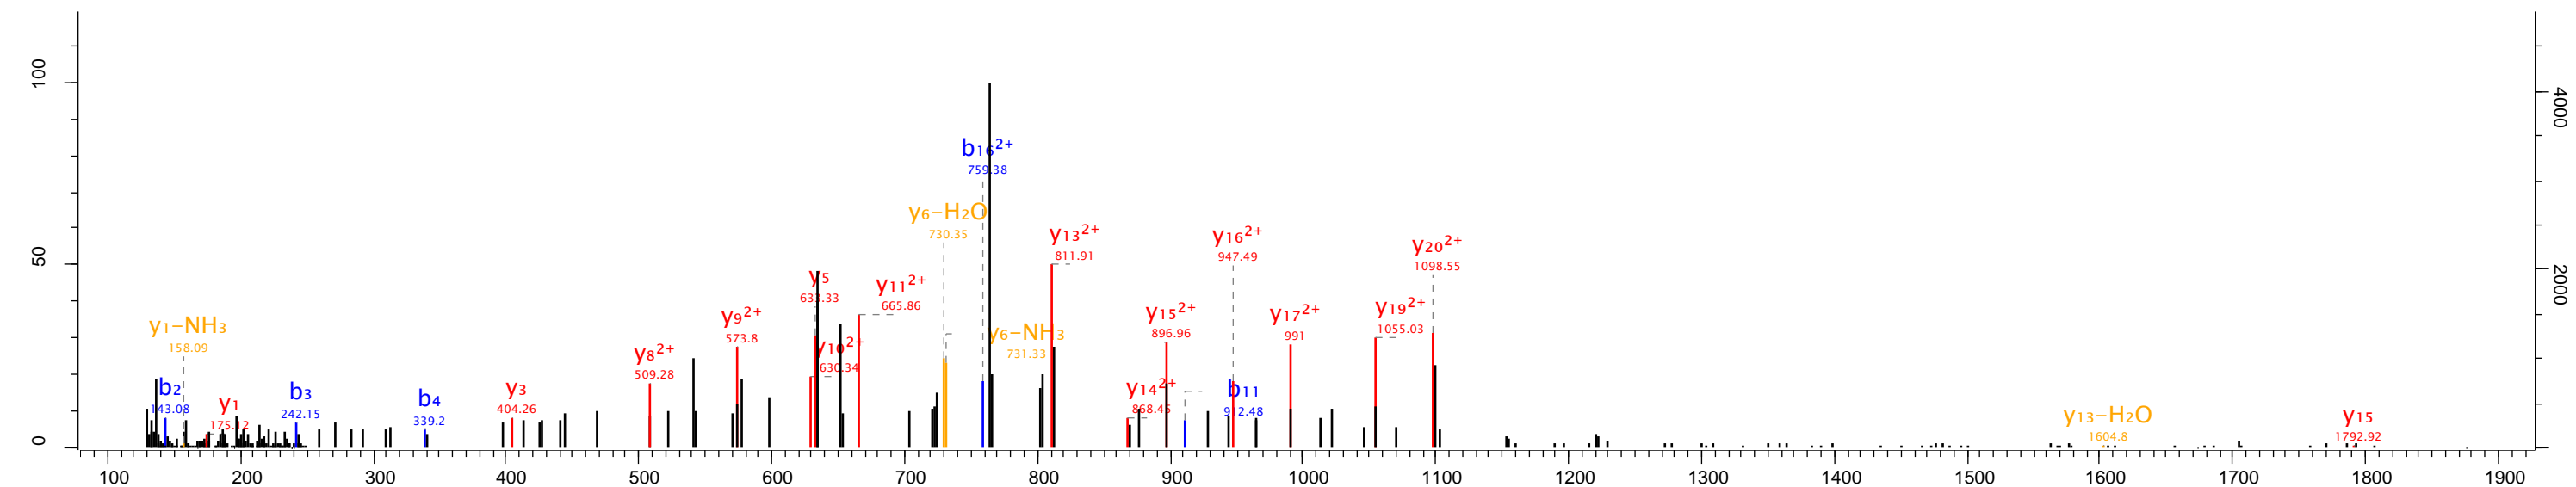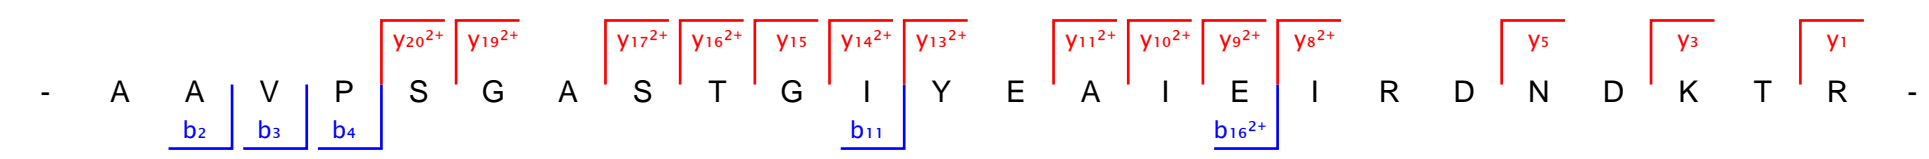

Spectral Annotation for Single-Peptide IDs between Single D11 Cells using Q-OT-LIT

Raw file 2015-01-08\_CL03\_Blastomere-15 Scan 30228 Method ITMS; HCD Score 40.88 m/z 564.97

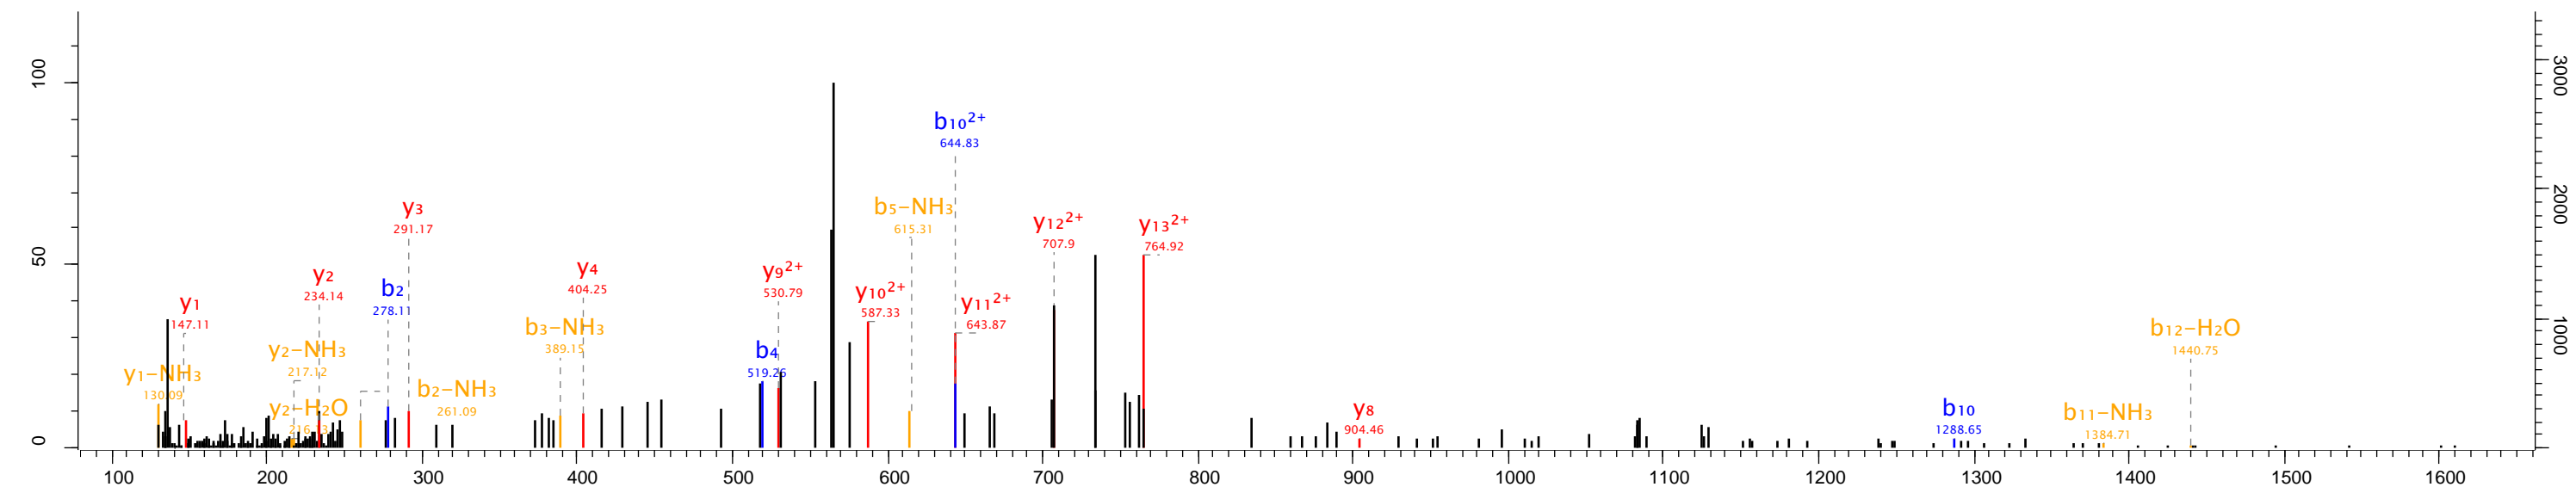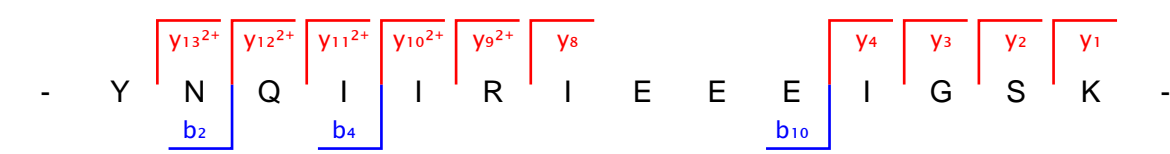

Spectral Annotation for Single-Peptide IDs between Single D11 Cells using Q-OT-LIT

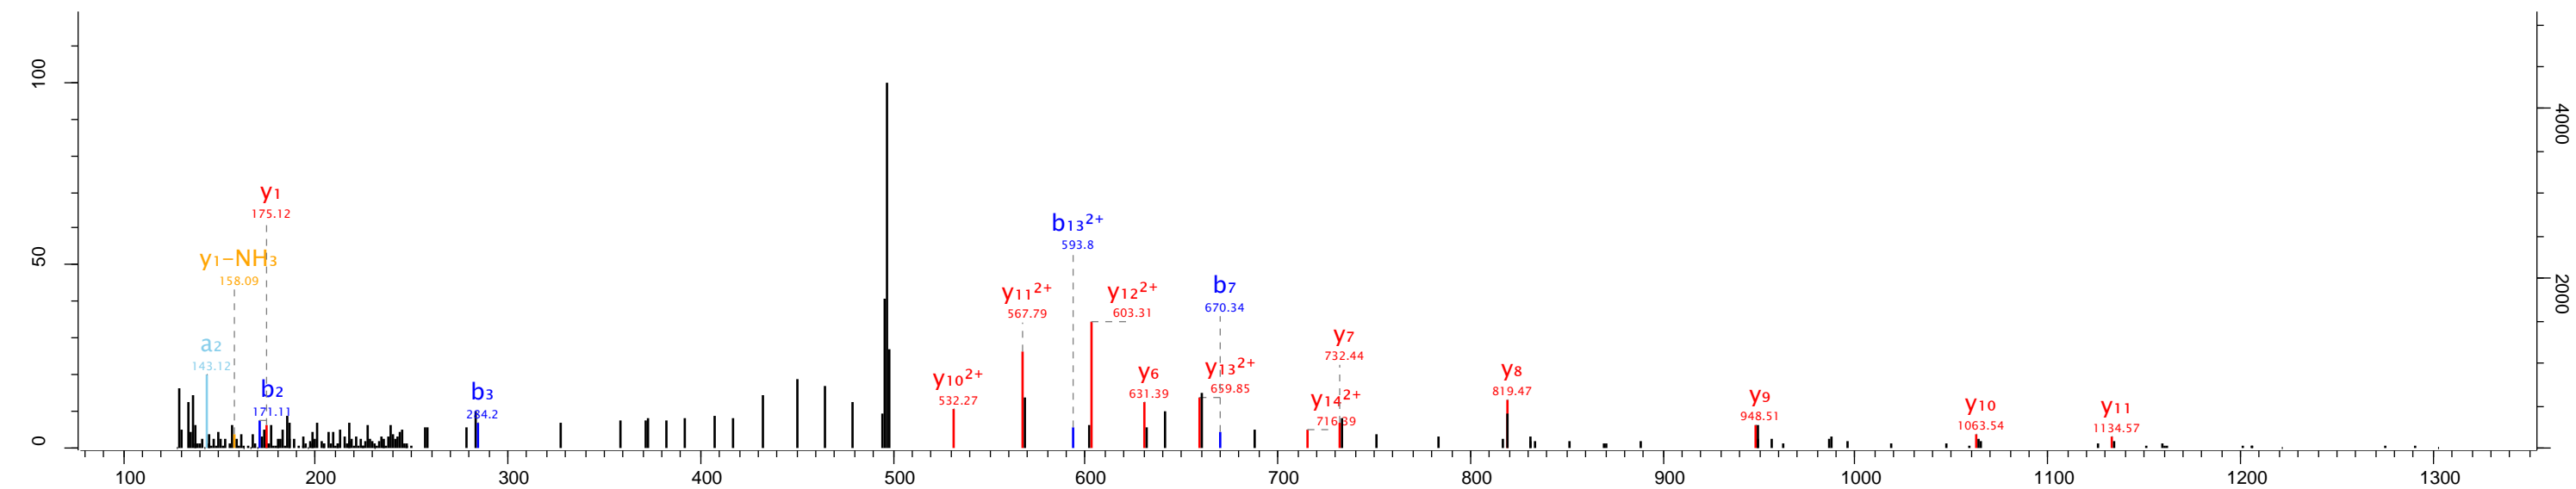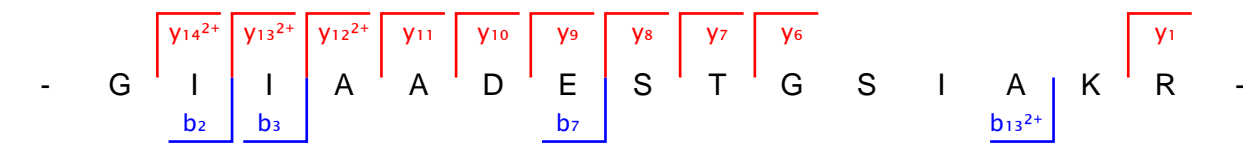



Raw file 2015-01-08\_CL03\_Blastomere-15 Scan 30311 Method ITMS; HCD Score 92.94 m/z 496.94

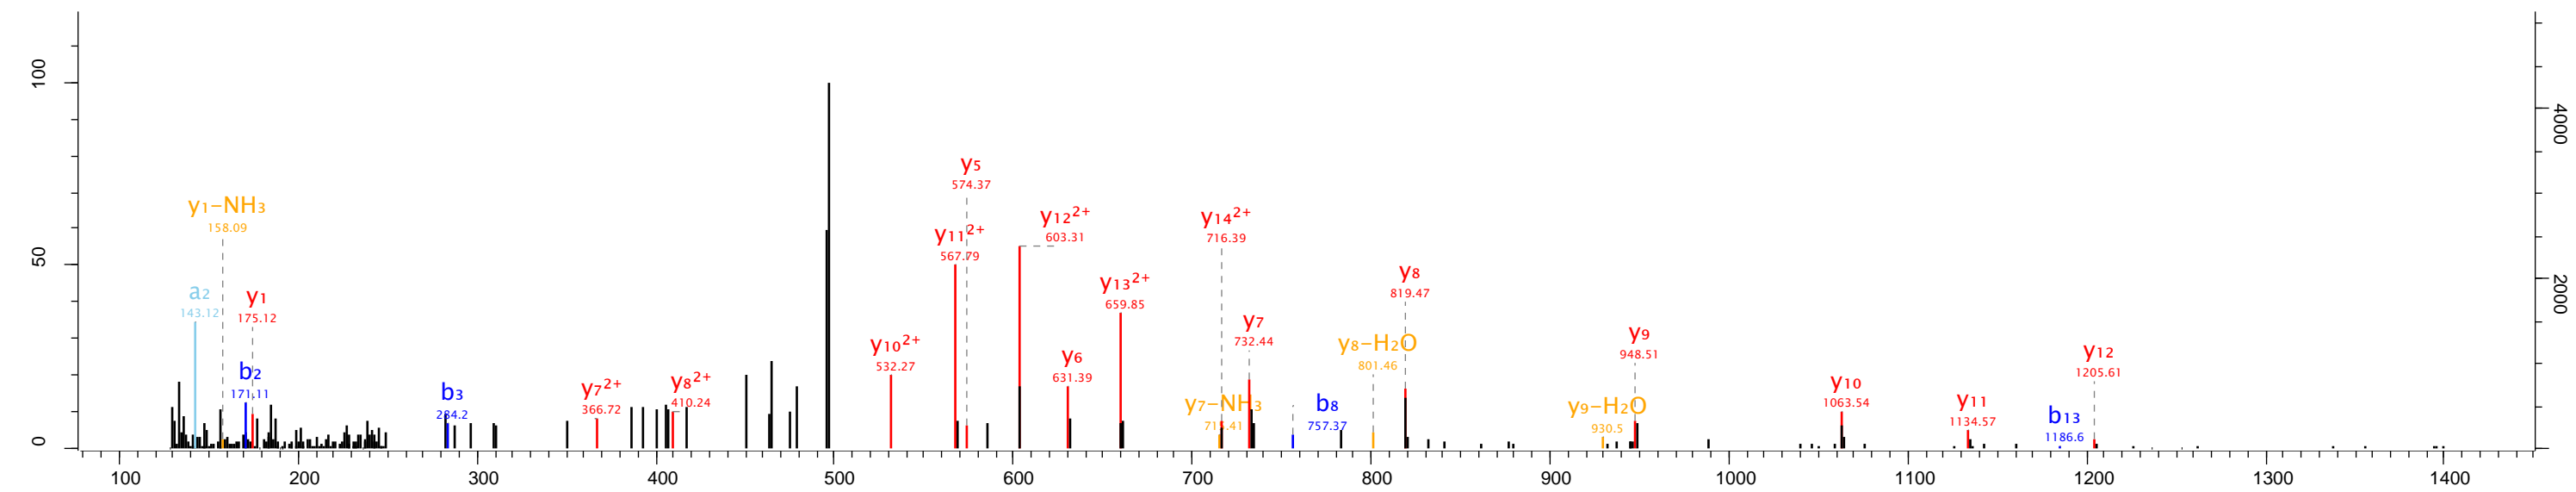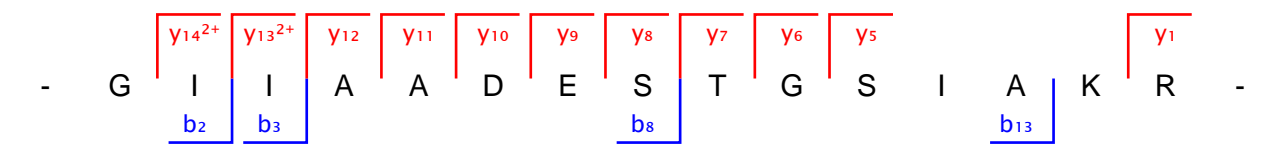

Raw file 2015-01-08\_CL03\_Blastomere-15 Scan 30314 Method ITMS; HCD Score 73.76 m/z 634.58

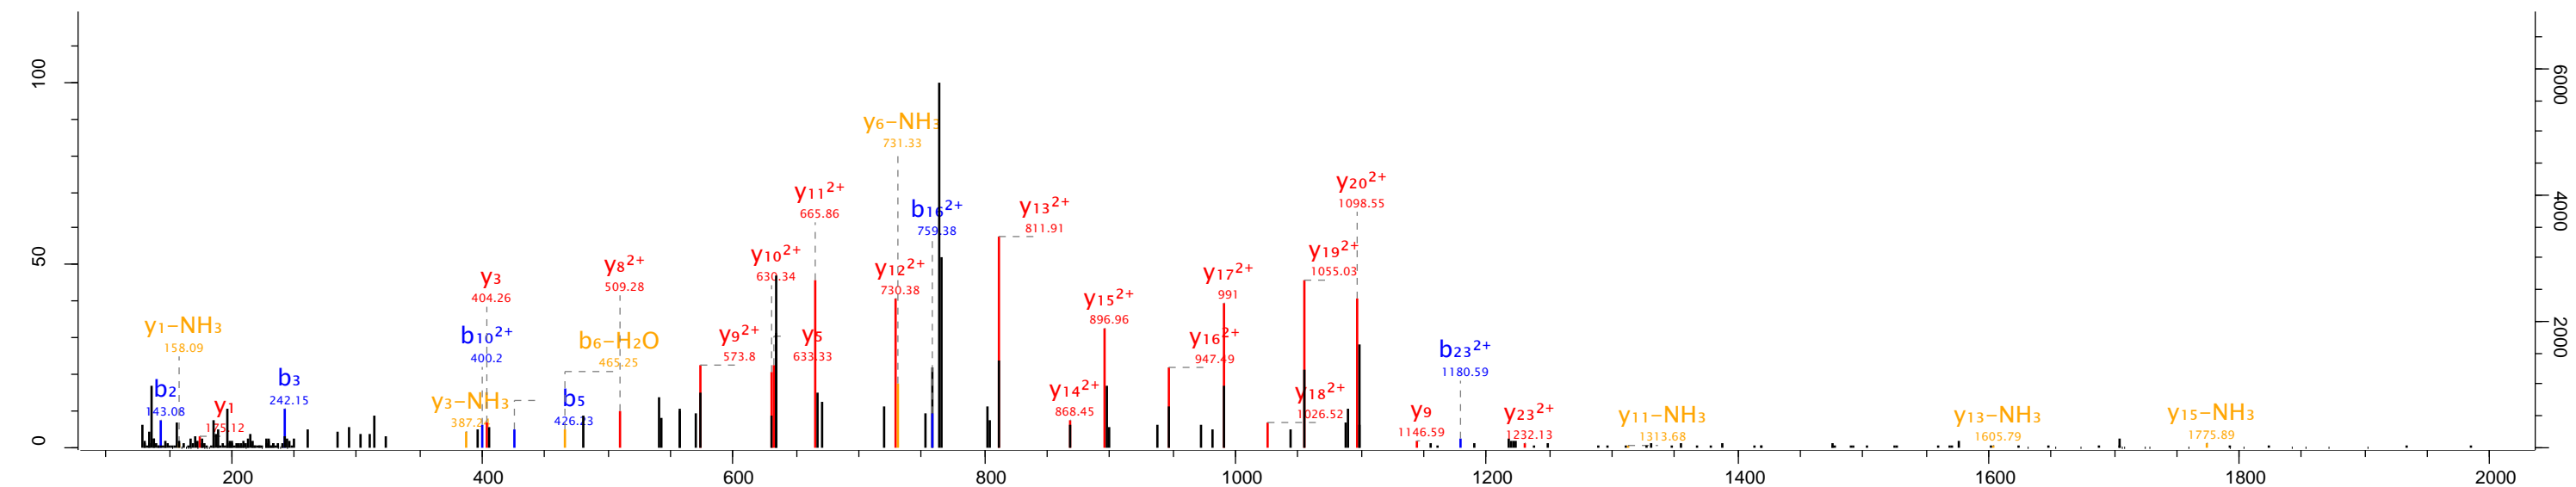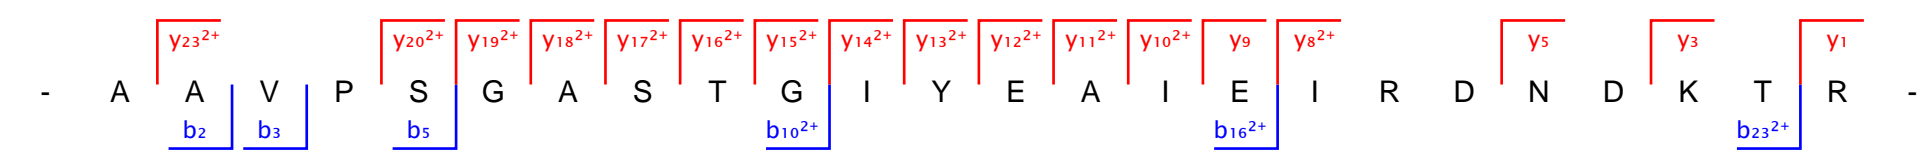

Spectral Annotation for Single-Peptide IDs between Single D11 Cells using Q-OT-LIT

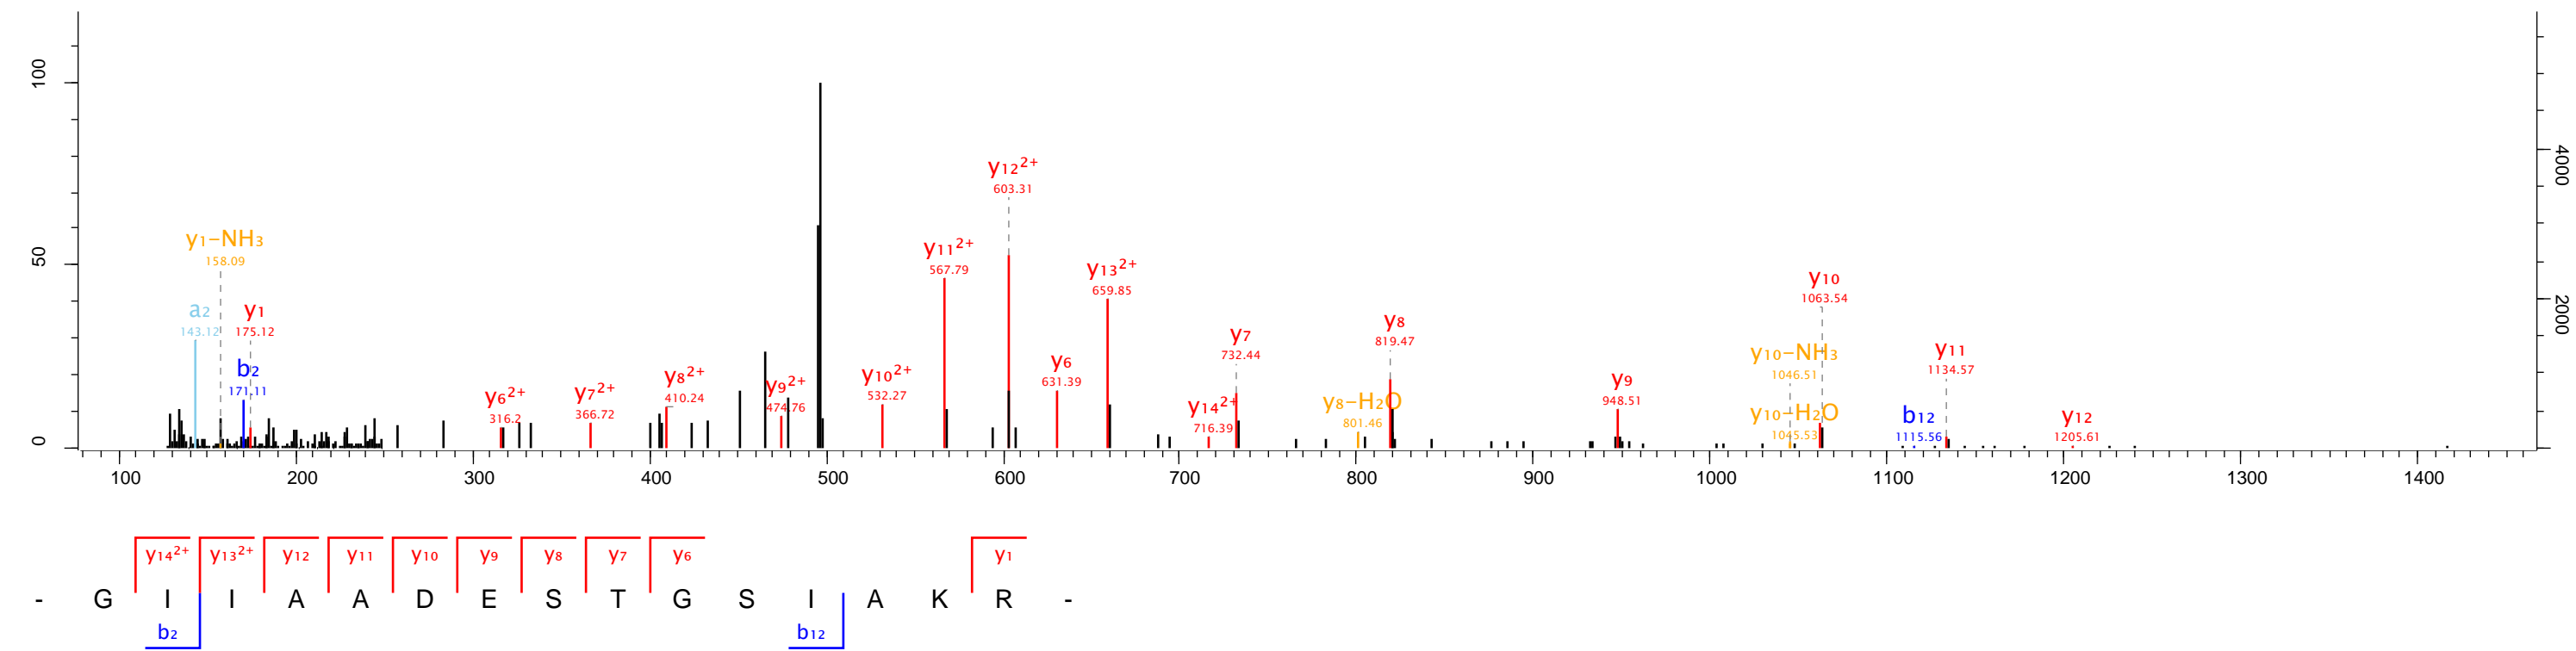

Raw file 2015-01-08\_CL03\_Blastomere-15 Scan 30335 Method ITMS; HCD Score 86.74 m/z 523.64

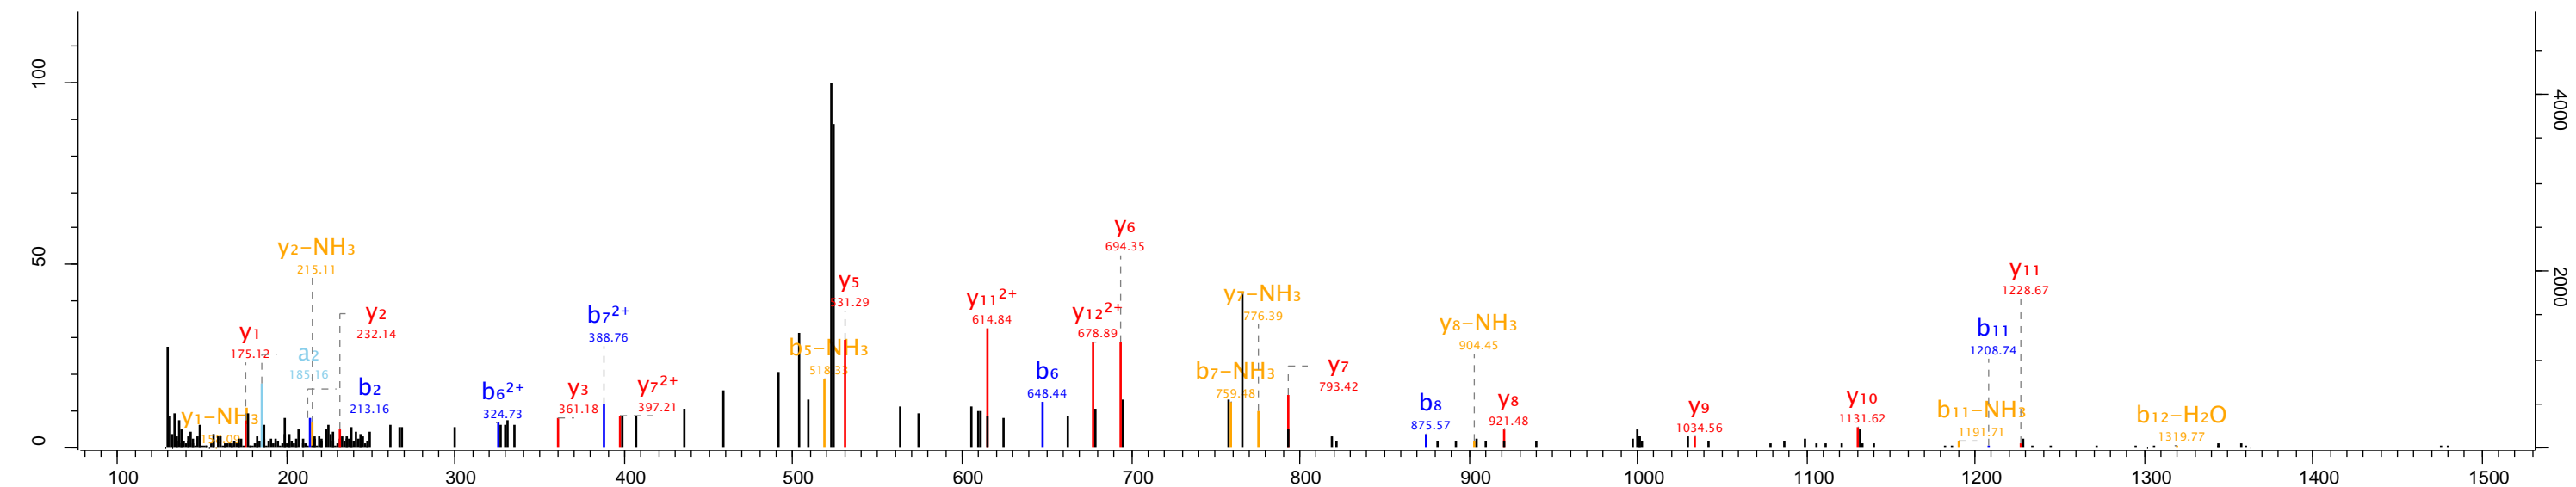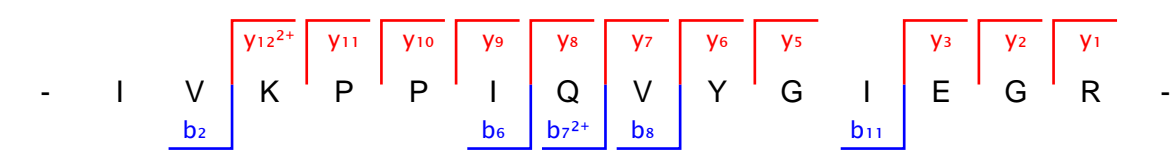

Spectral Annotation for Single-Peptide IDs between Single D11 Cells using Q-OT-LIT

Raw file 2015-01-08\_CL03\_Blastomere-15 Scan 30342 Method ITMS; HCD Score 94.69 m/z 496.94

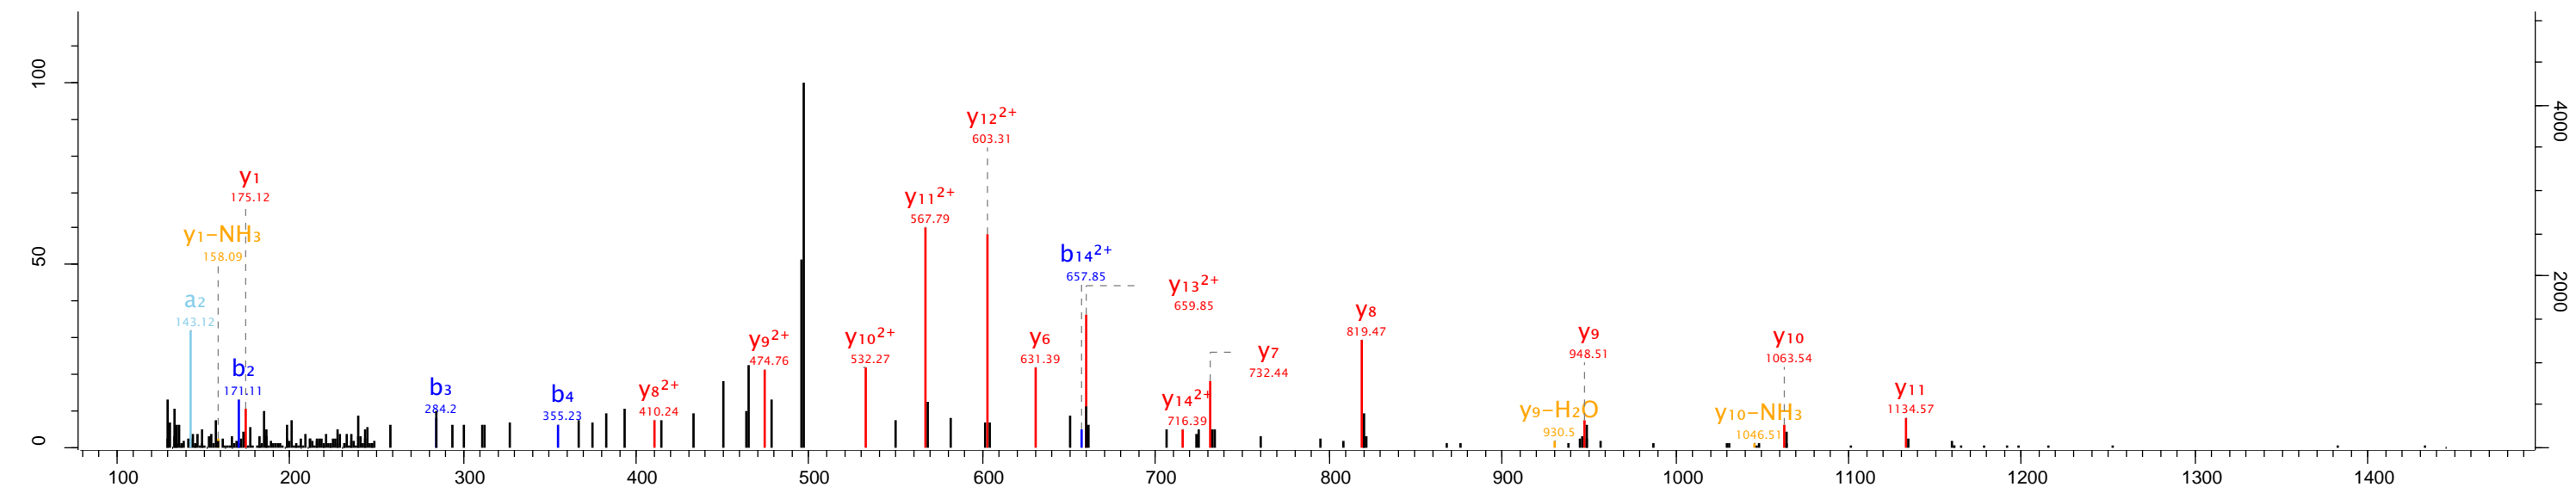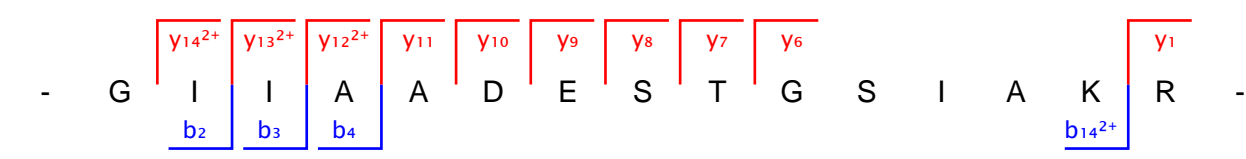

Spectral Annotation for Single-Peptide IDs between Single D11 Cells using Q-OT-LIT

Raw file 2015-01-08\_CL03\_Blastomere-15 Scan 30363 Method ITMS; HCD Score 85.27 m/z 523.64

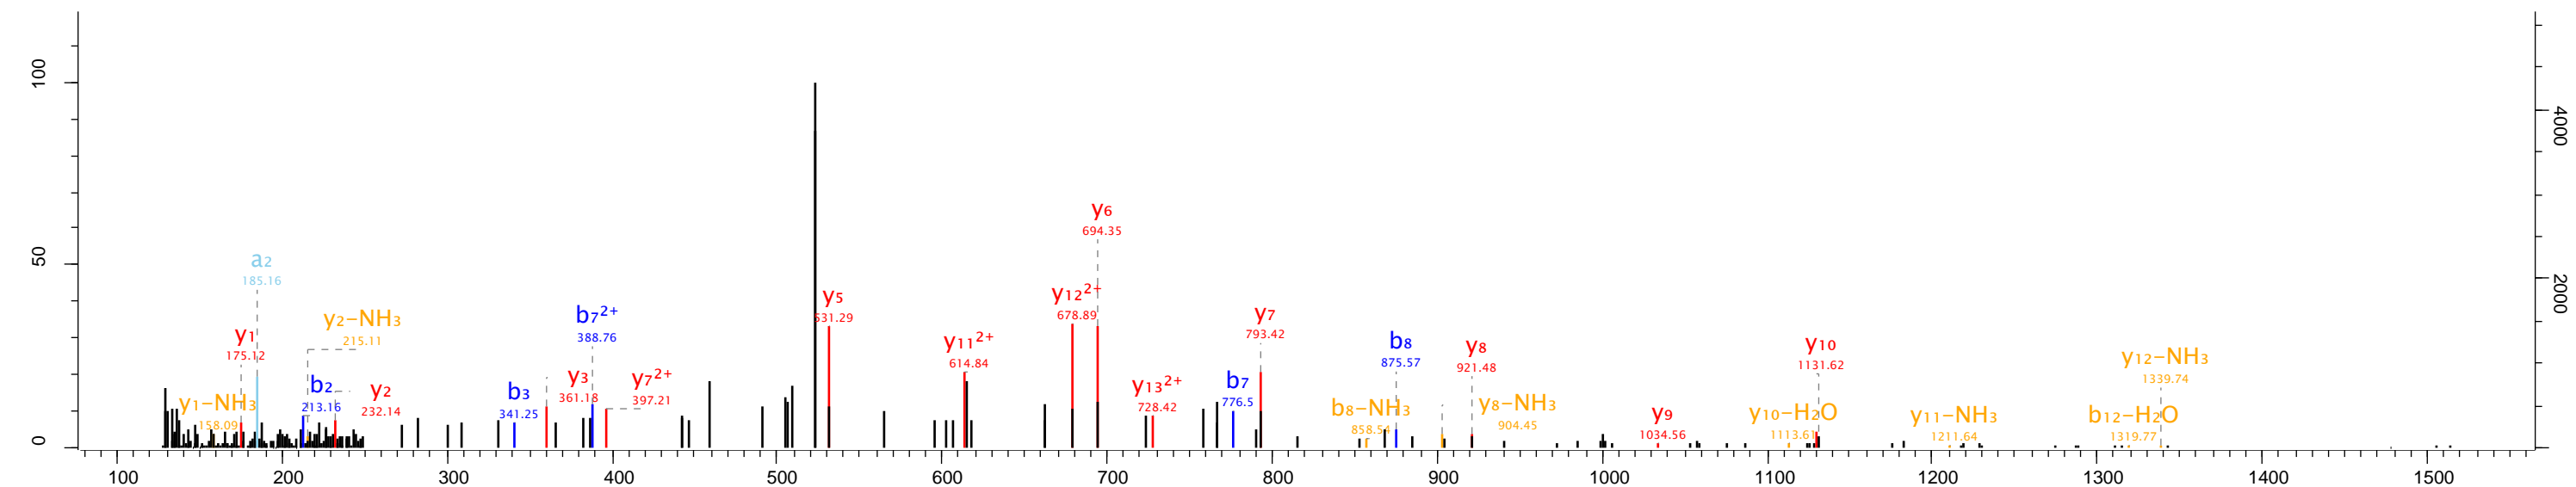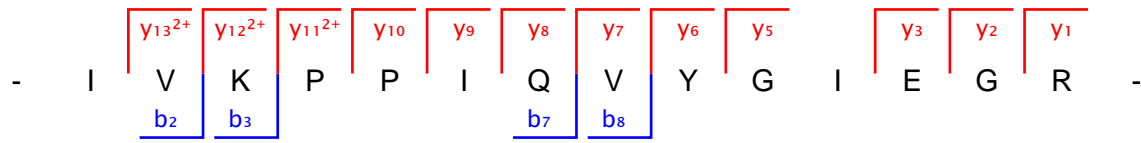

Spectral Annotation for Single-Peptide IDs between Single D11 Cells using Q-OT-LIT

Raw file 2015-01-08\_CL03\_Blastomere-15 Scan 30435 Method ITMS; HCD Score 52.01 m/z 519.91

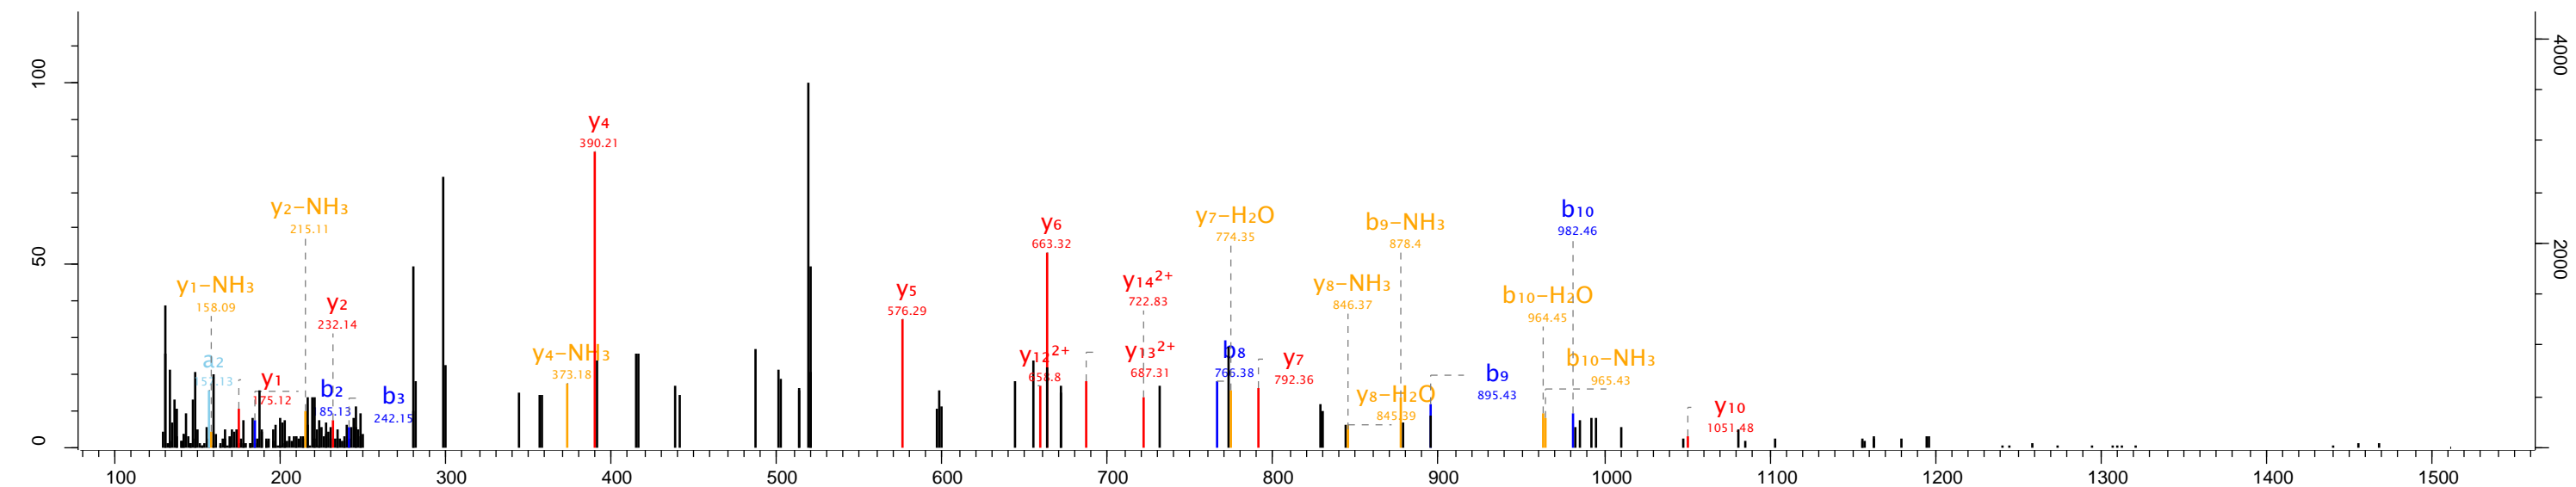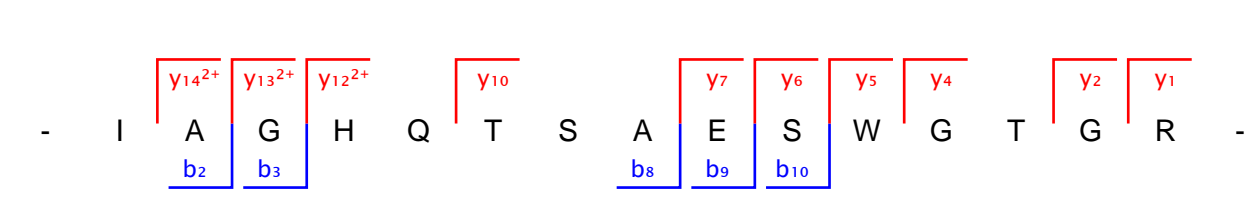

Raw file 2015-01-08\_CL03\_Blastomere-15 Scan 30468 Method ITMS; HCD Score 54.81 m/z 775.39

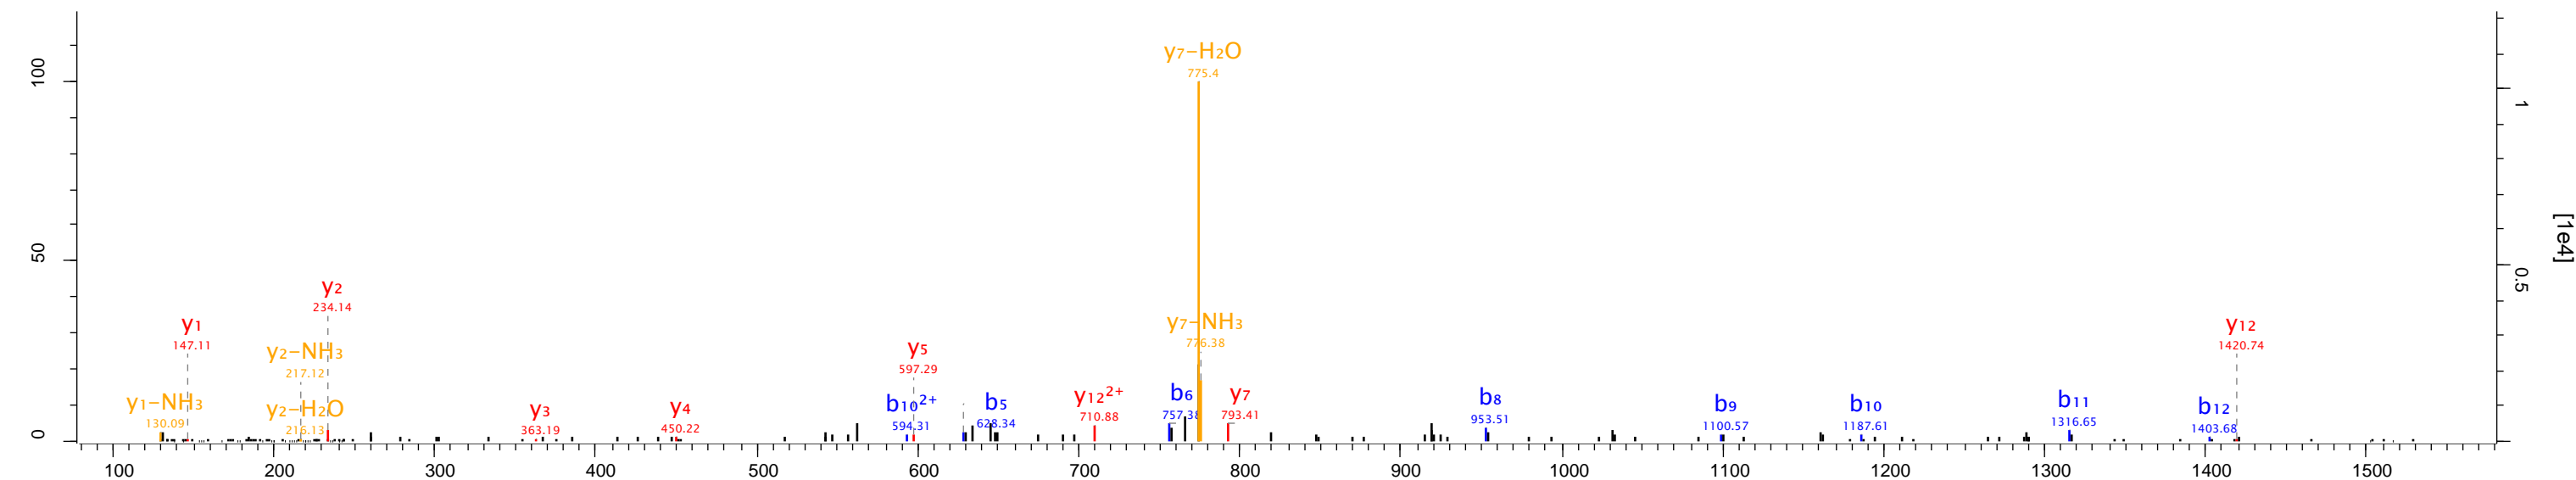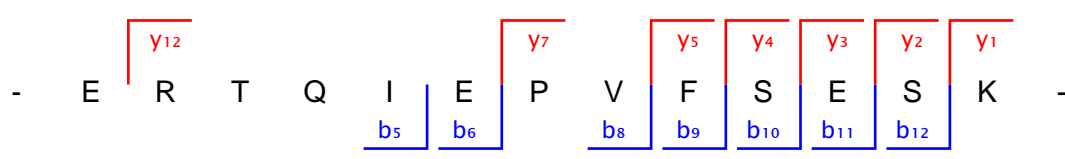

Spectral Annotation for Single-Peptide IDs between Single D11 Cells using Q-OT-LIT



Raw file 2015-01-08\_CL03\_Blastomere-15  
 Scan 30487 Method ITMS; HCD Score 76.76 m/z 517.27

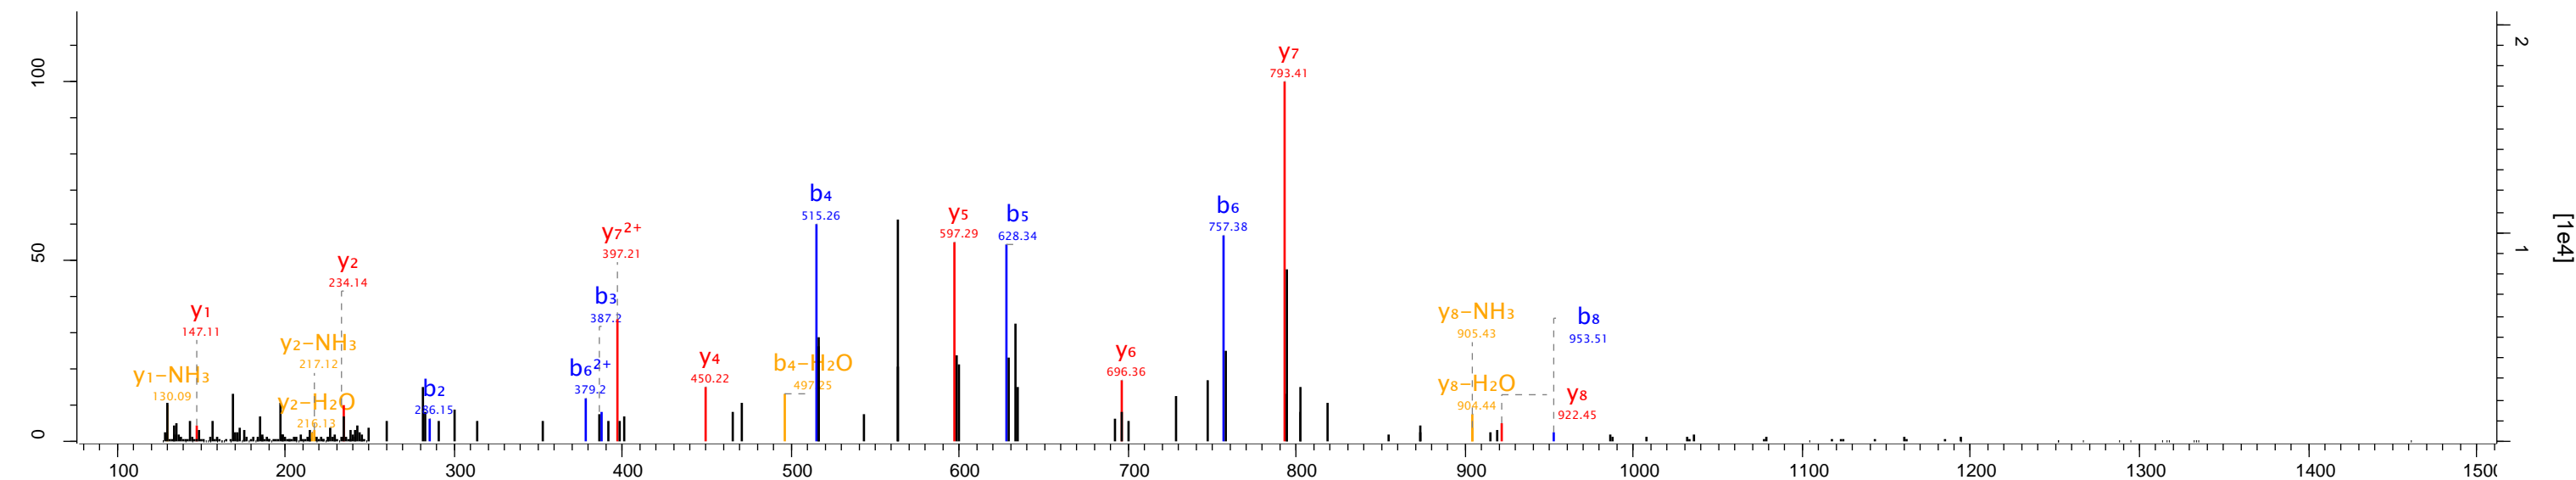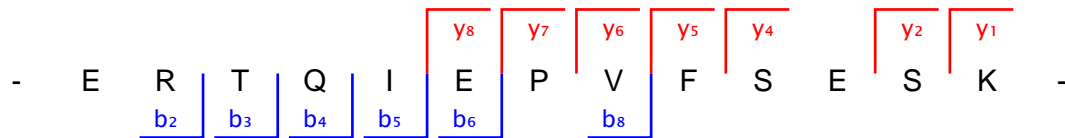

Spectral Annotation for Single-Peptide IDs between Single D11 Cells using Q-OT-LIT

Raw file 2015-01-08\_CL03\_Blastomere-15 Scan 30498 Method ITMS; HCD Score 37.66 m/z 497.28

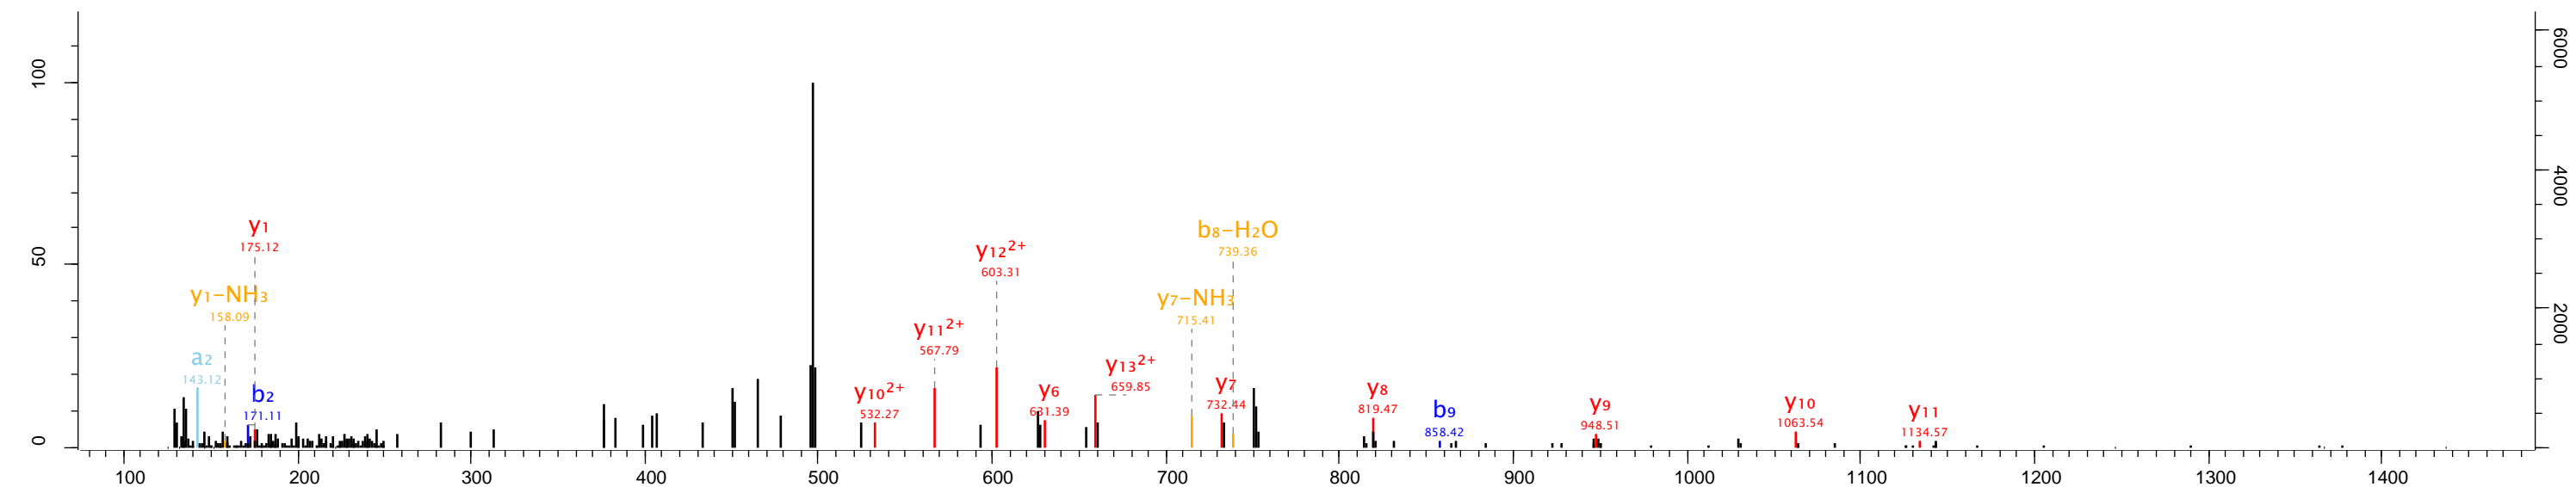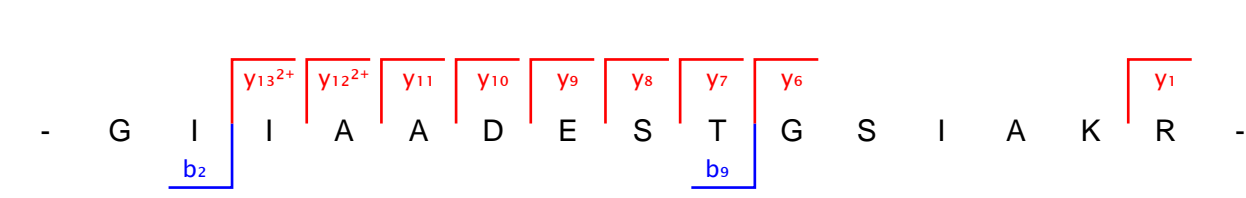

Raw file: 2015-01-08\_CL03\_Blastomere-15  
 Scan: 30503 Method: ITMS; HCD Score: 108.36 m/z: 775.39

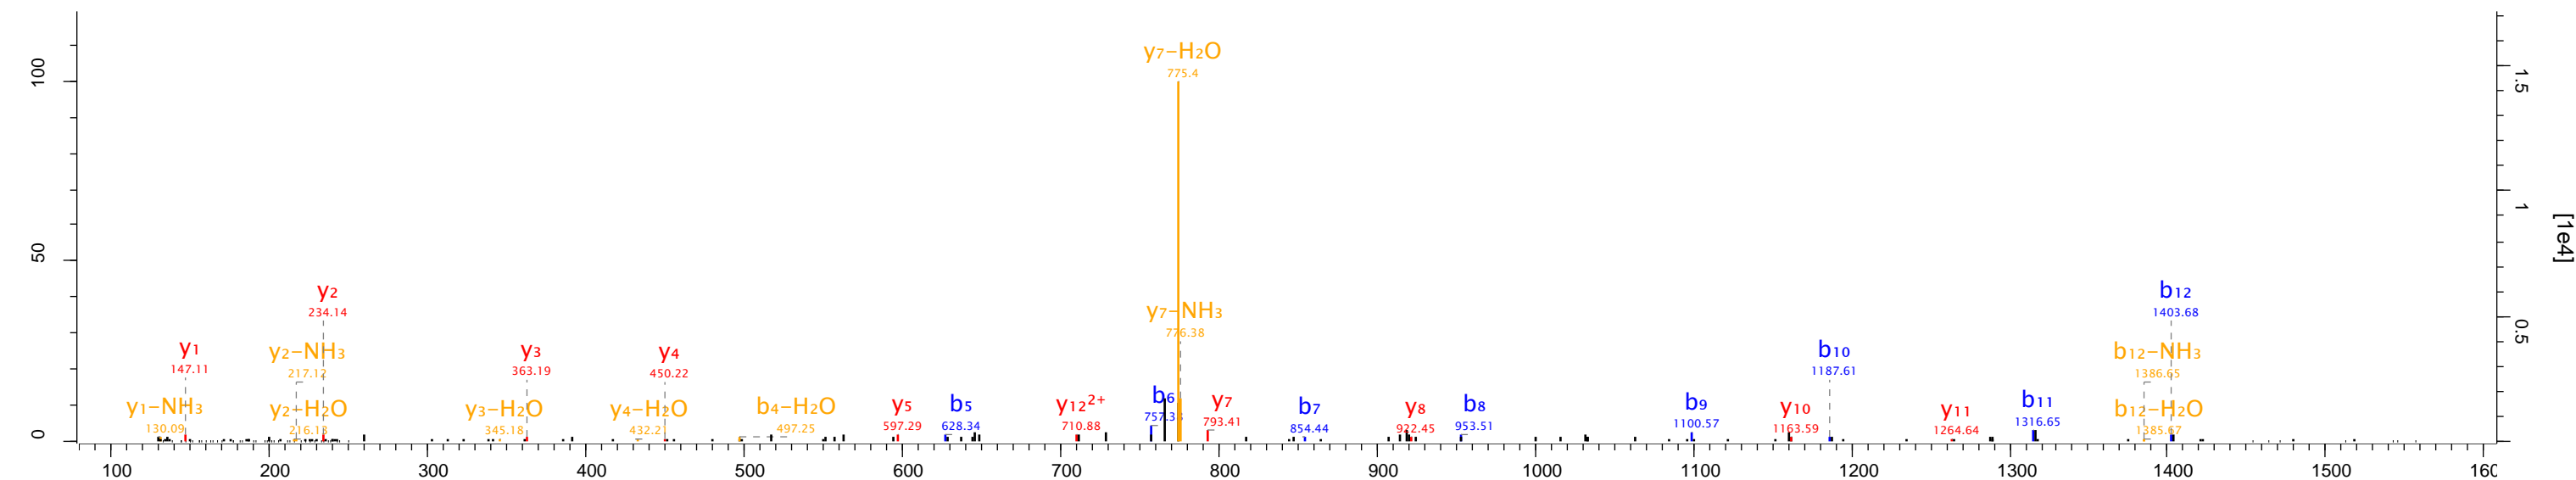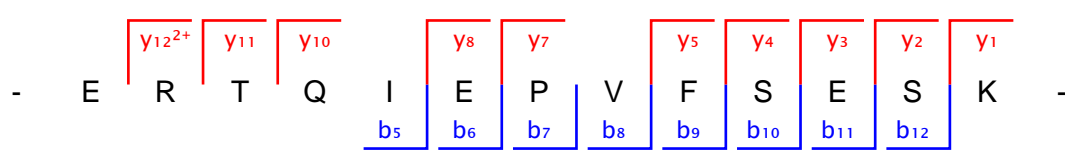

Spectral Annotation for Single-Peptide IDs between Single D11 Cells using Q-OT-LIT

Raw file: 2015-01-08\_CL03\_Blastomere-15  
 Scan: 30509 Method: ITMS; HCD Score: 68.04 m/z: 517.26

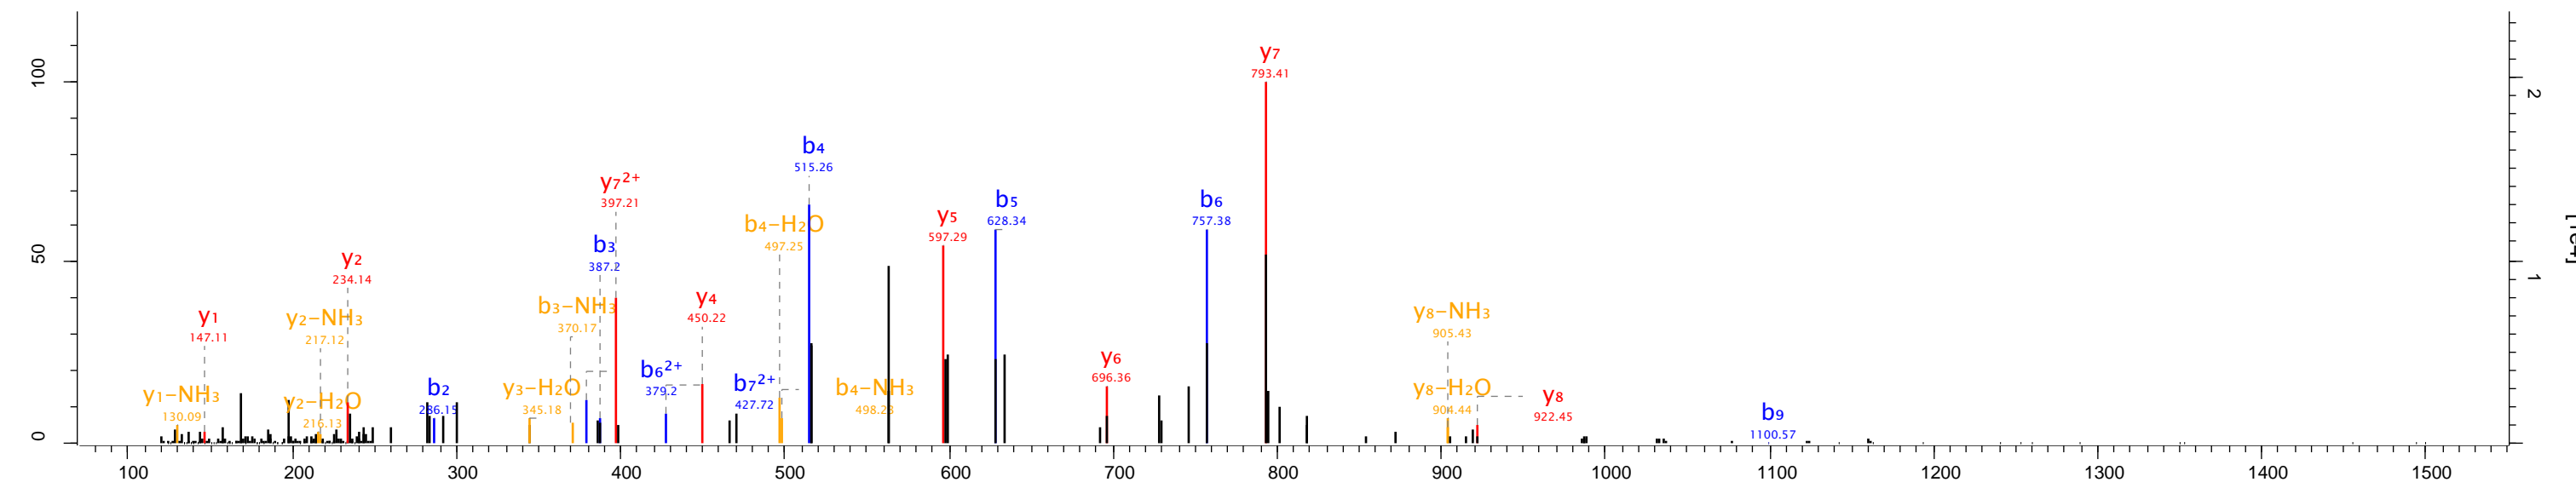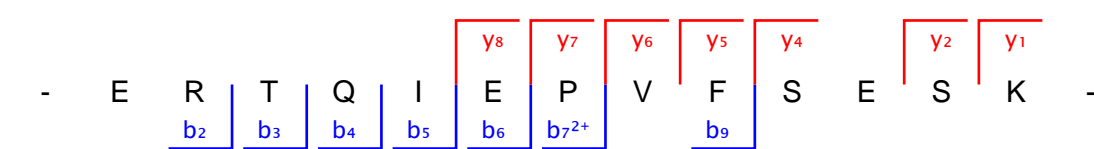

Spectral Annotation for Single-Peptide IDs between Single D11 Cells using Q-OT-LIT

Raw file 2015-01-08\_CL03\_Blastomere-15 Scan 30579 Method ITMS; HCD Score 65.08 m/z 634.57

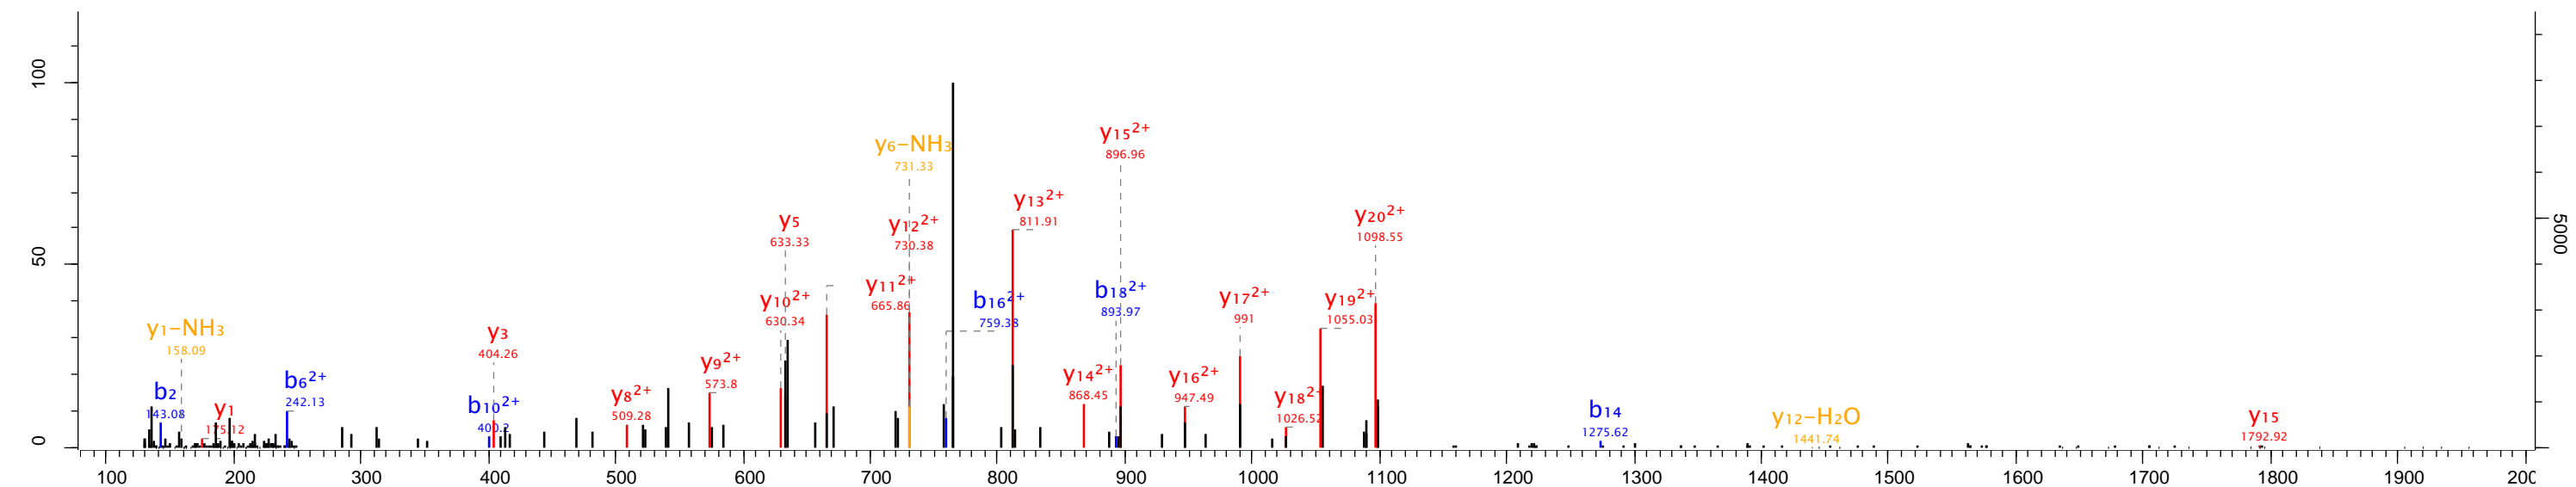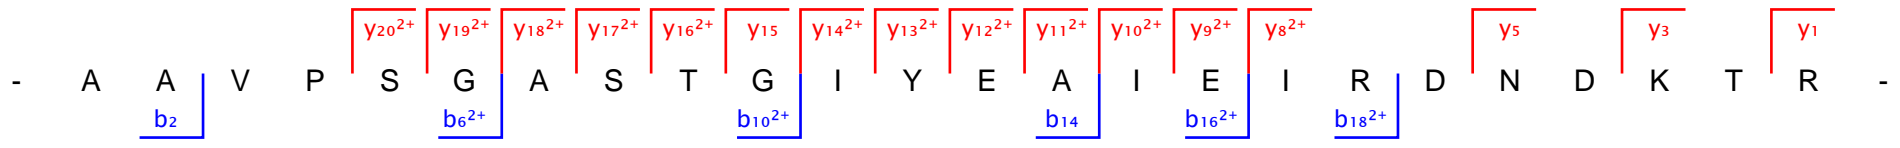

Spectral Annotation for Single-Peptide IDs between Single D11 Cells using Q-OT-LIT

Raw file 2015-01-08\_CL03\_Blastomere-15 Scan 30630 Method ITMS; HCD Score 64.26 m/z 634.57

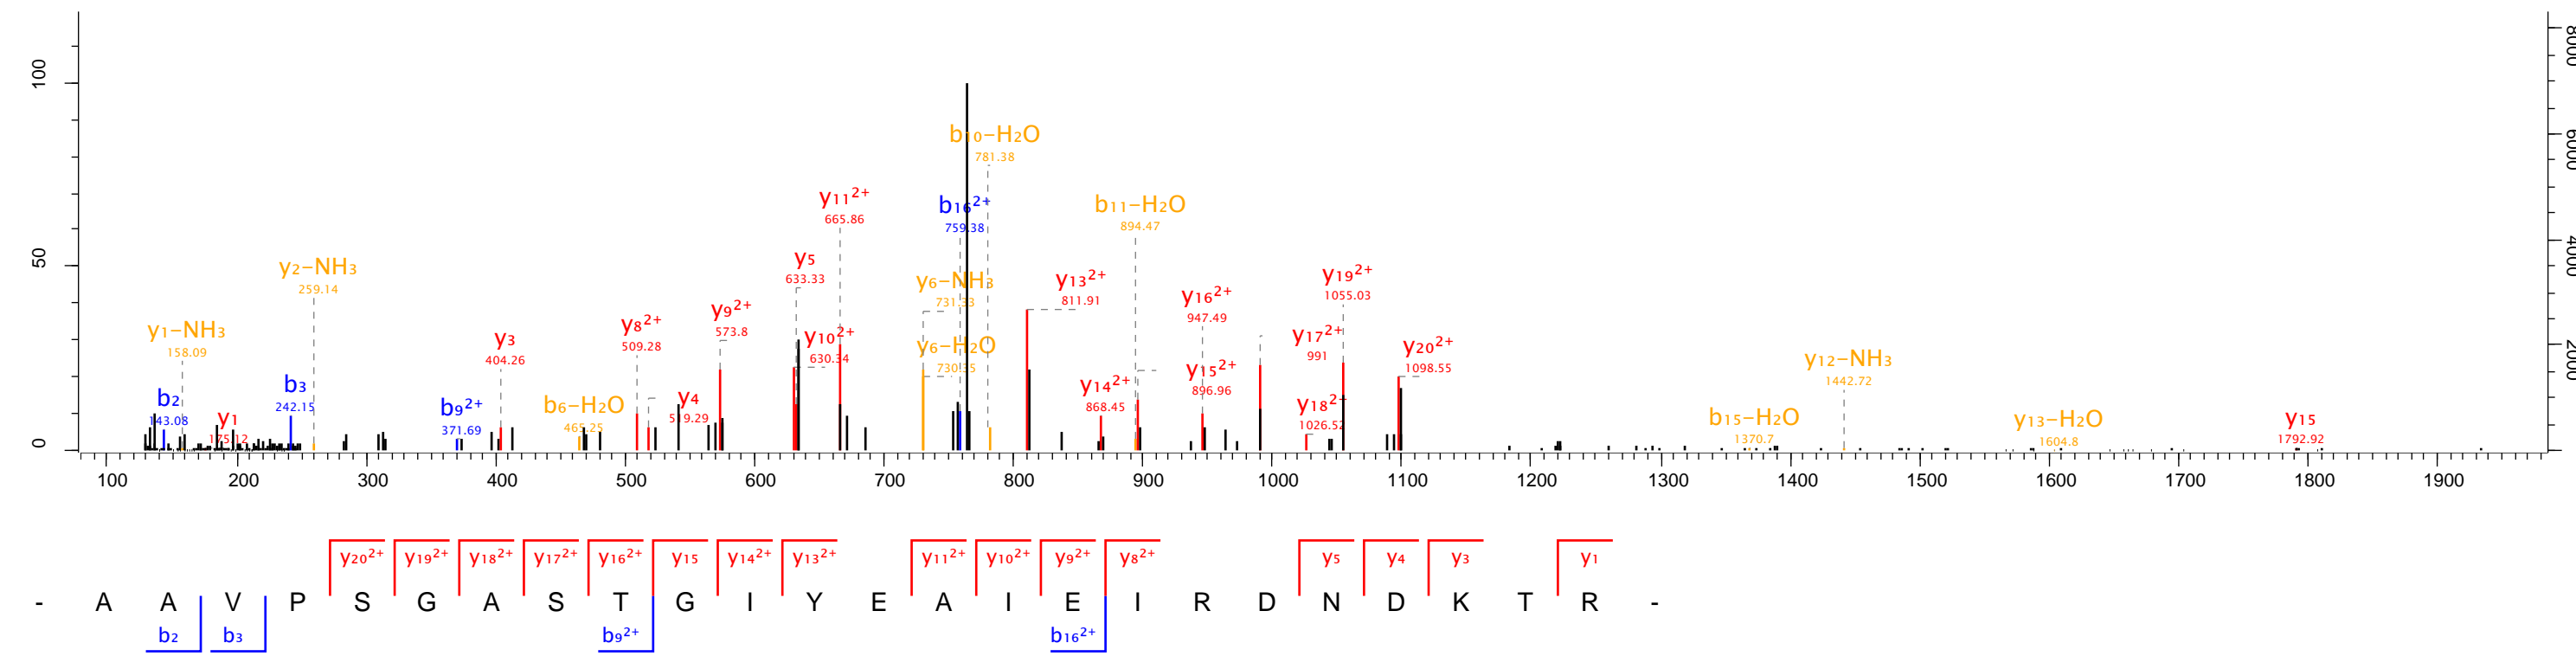

Spectral Annotation for Single-Peptide IDs between Single D11 Cells using Q-OT-LIT

Raw file: 2015-01-08\_CL03\_Blastomere-15  
 Scan: 30702 Method: ITMS; HCD Score: 54.28 m/z: 803.37

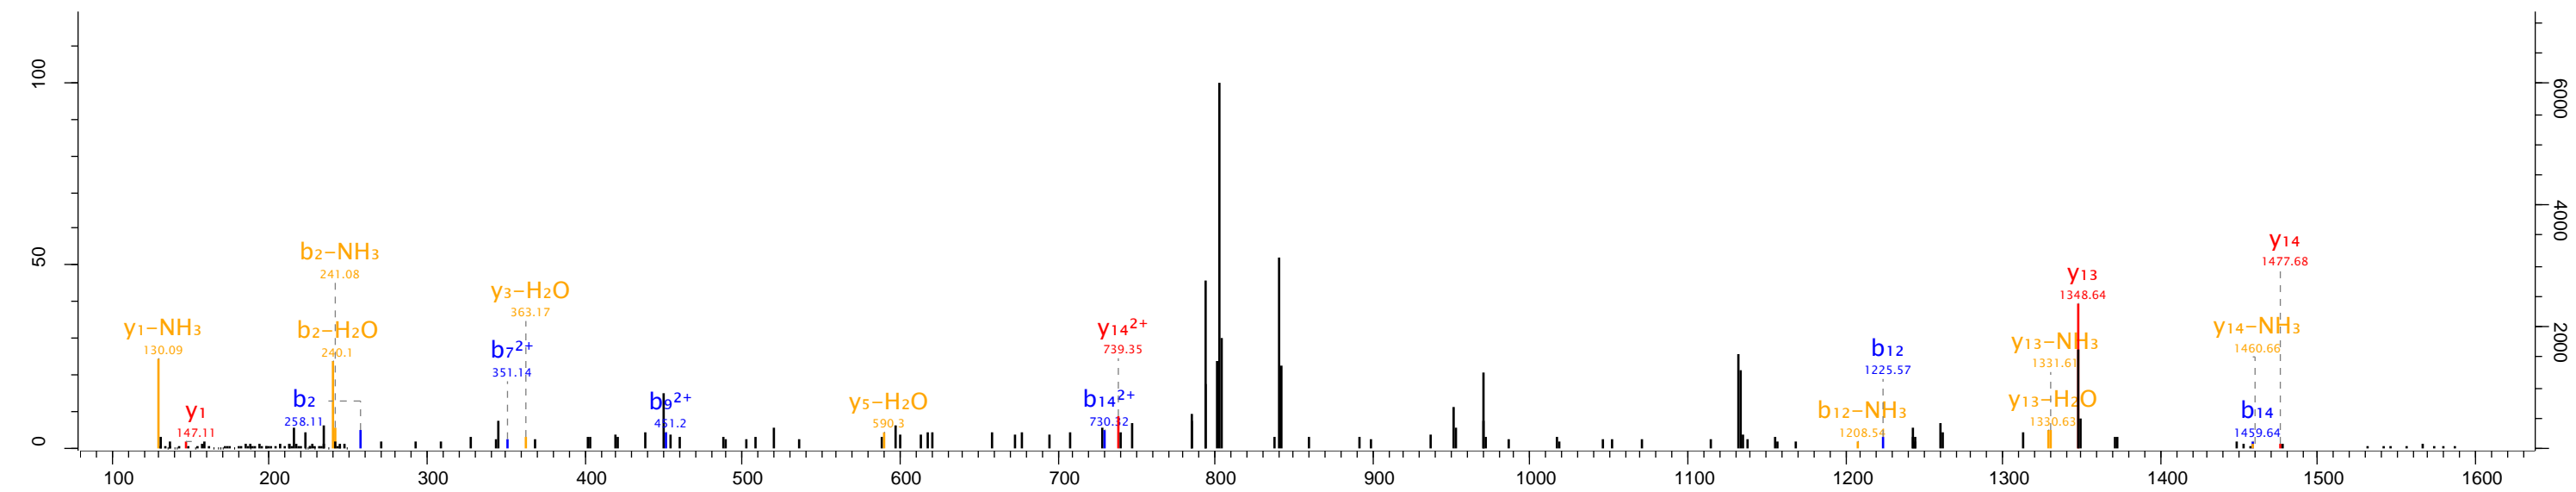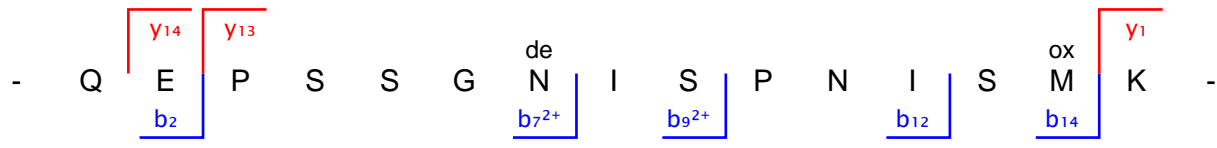

Raw file 2015-01-08\_CL03\_Blastomere-15 Scan 30730 Method ITMS; HCD Score 46.66 m/z 523.64

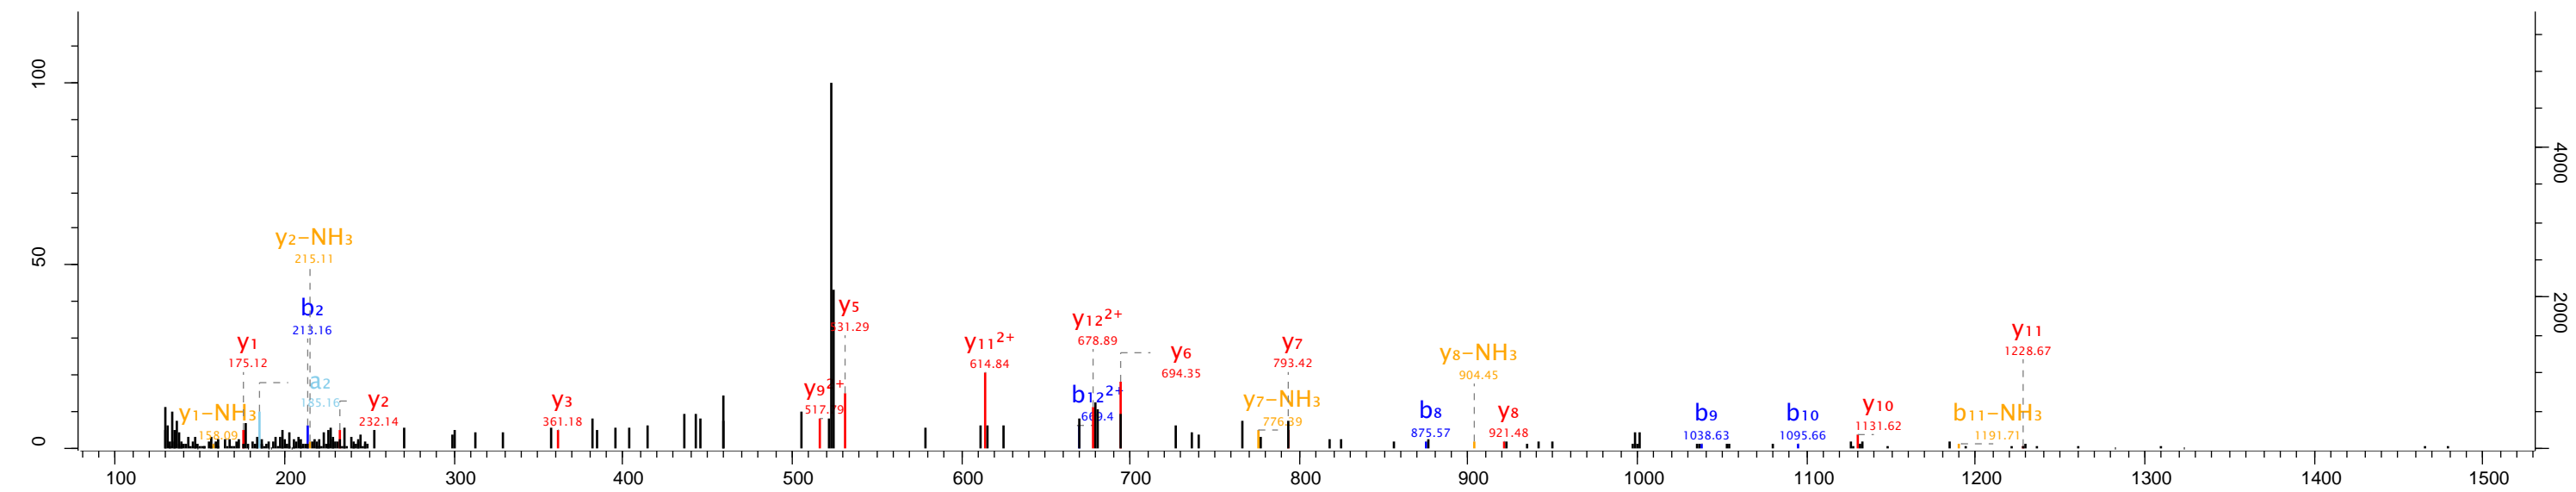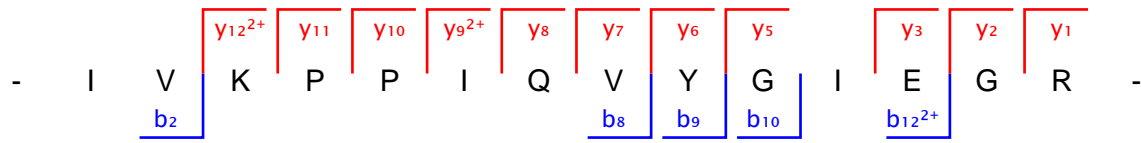

Spectral Annotation for Single-Peptide IDs between Single D11 Cells using Q-OT-LIT



Raw file  
 2015-01-08\_CL03\_Blastomere-15  
 Scan 30837 Method ITMS; HCD Score 69.46 m/z 775.41

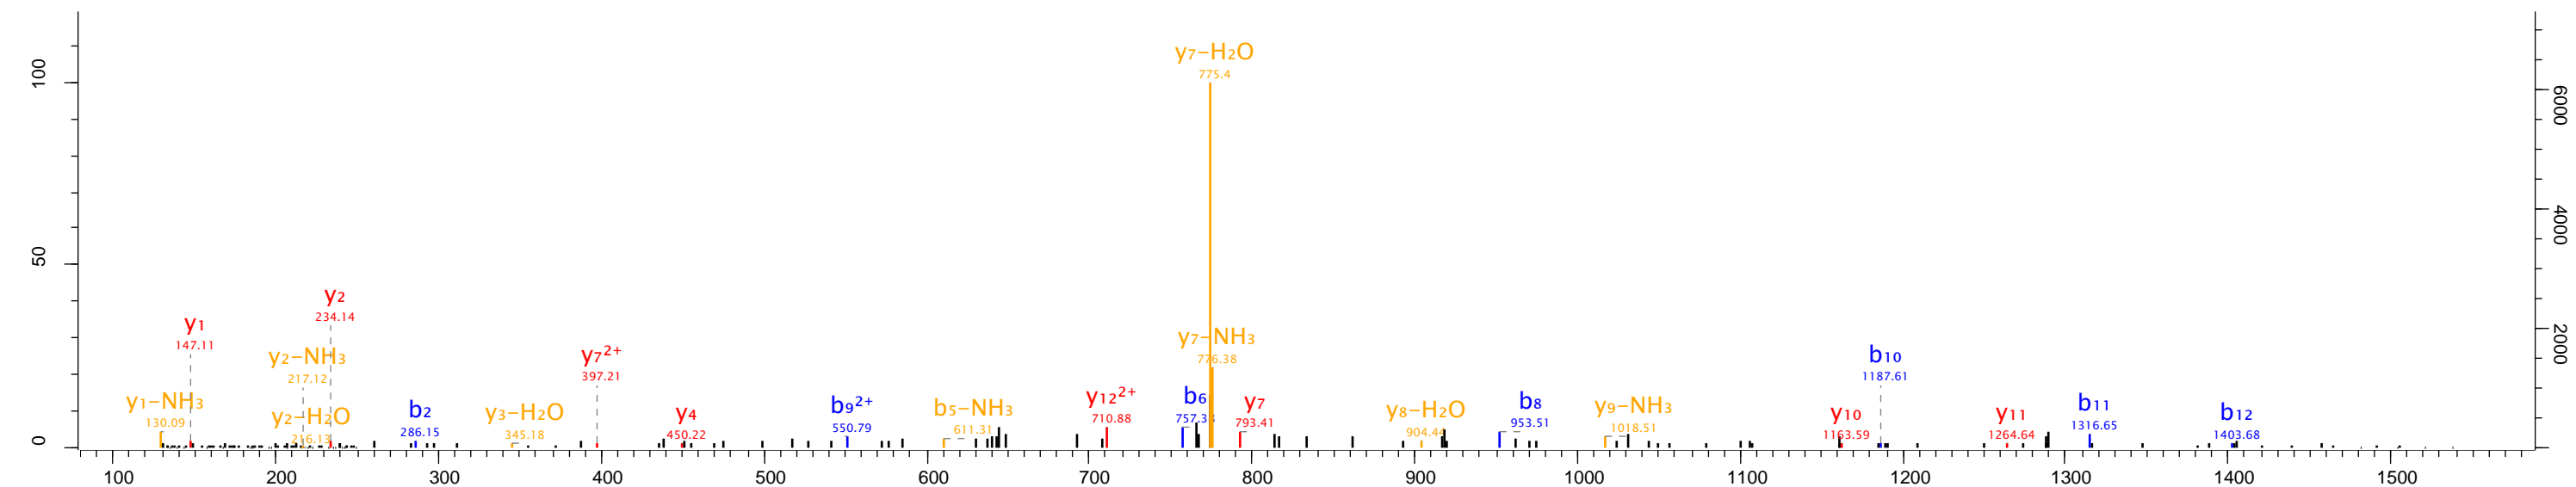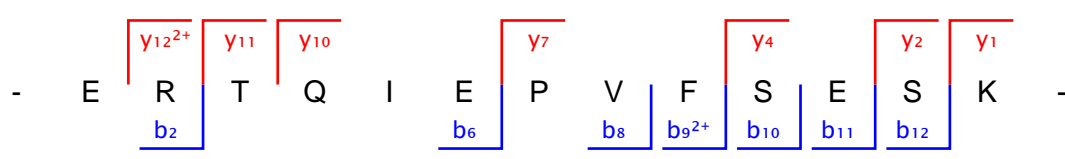

Spectral Annotation for Single-Peptide IDs between Single D11 Cells using Q-OT-LIT

Raw file 2015-01-08\_CL03\_Blastomere-15 Scan 30859 Method ITMS; HCD Score 75.97 m/z 775.4

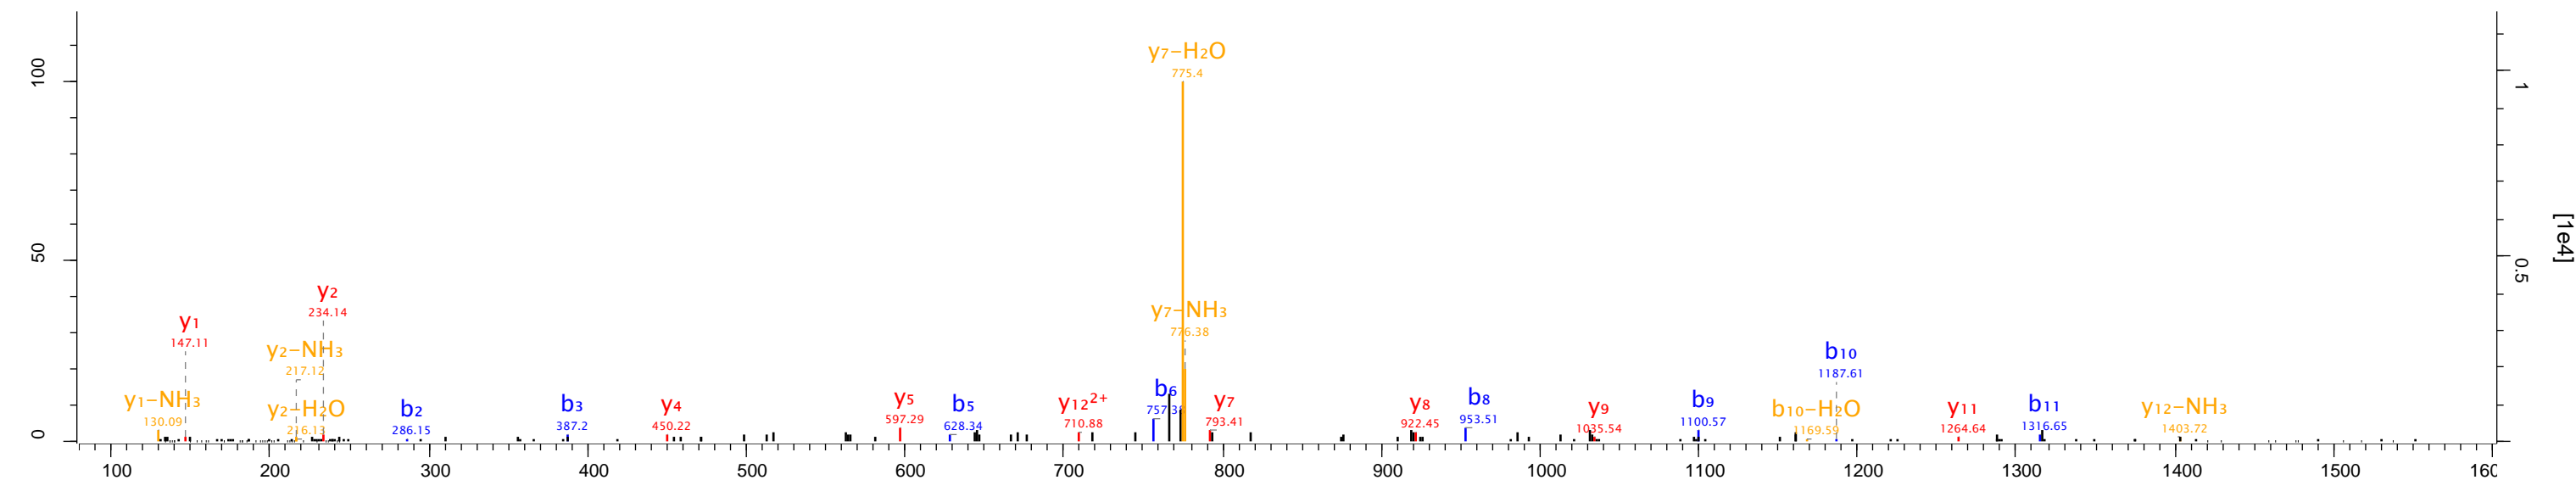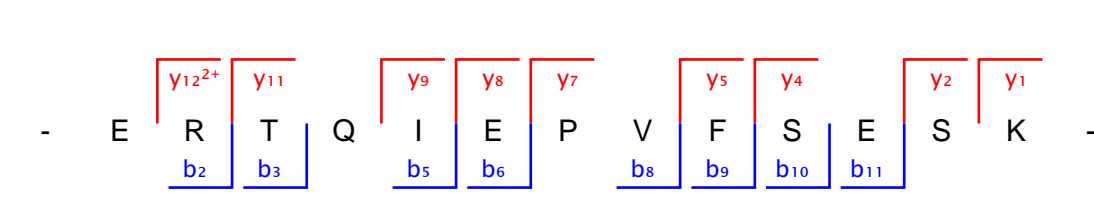

Spectral Annotation for Single-Peptide IDs between Single D11 Cells using Q-OT-LIT

Raw file 2015-01-08\_CL03\_Blastomere-15 Scan 30868 Method ITMS; HCD Score 111.66 m/z 517.27

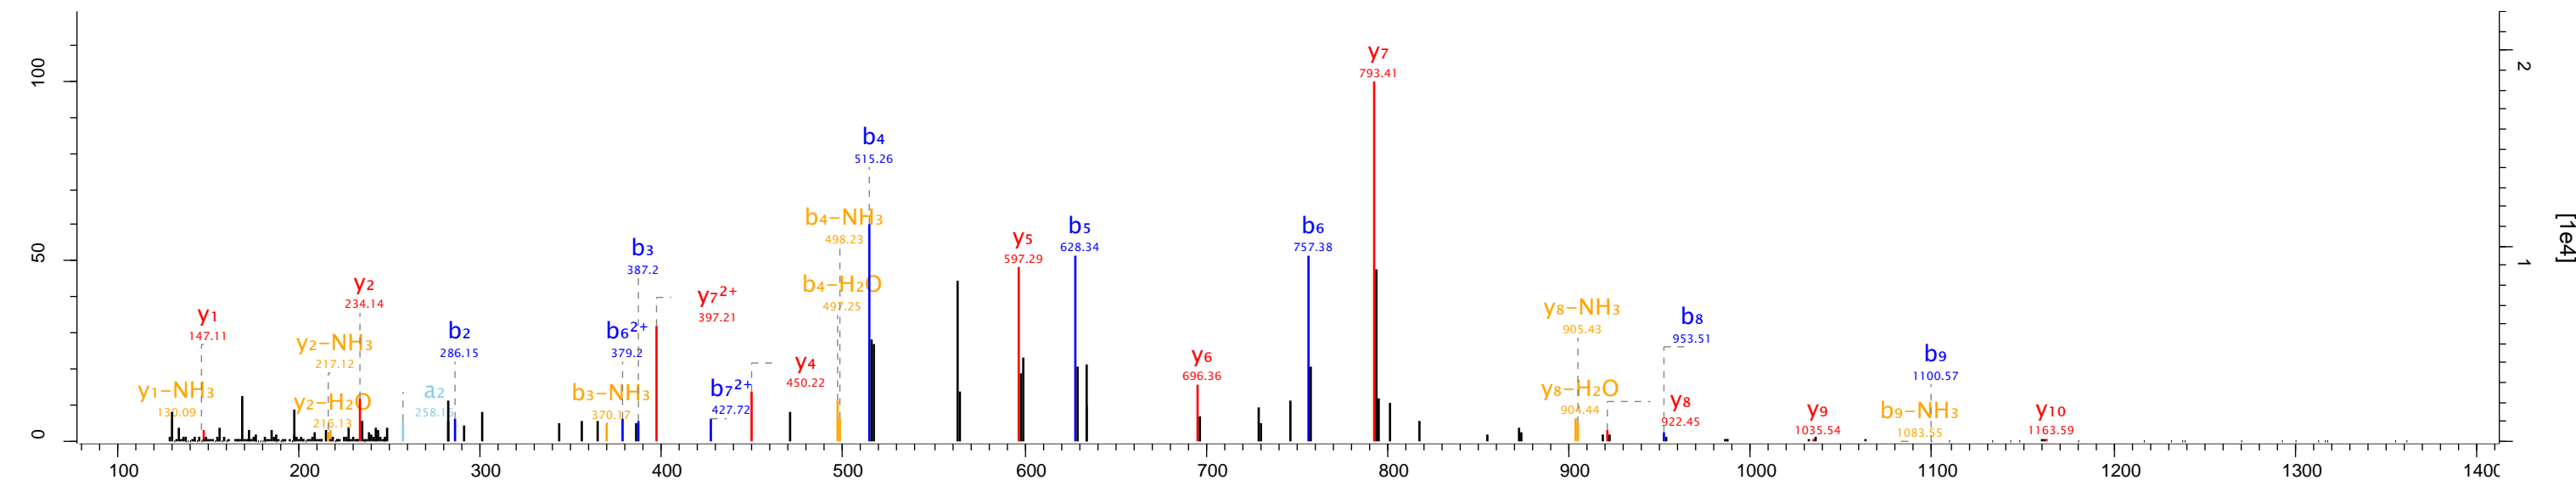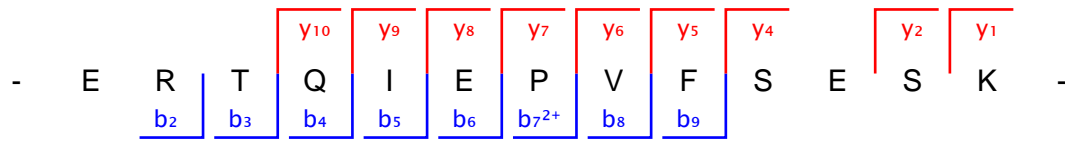

Spectral Annotation for Single-Peptide IDs between Single D11 Cells using Q-OT-LIT

Raw file 2015-01-08\_CL03\_Blastomere-15 Scan 30883 Method ITMS; HCD Score 103.3 m/z 517.26

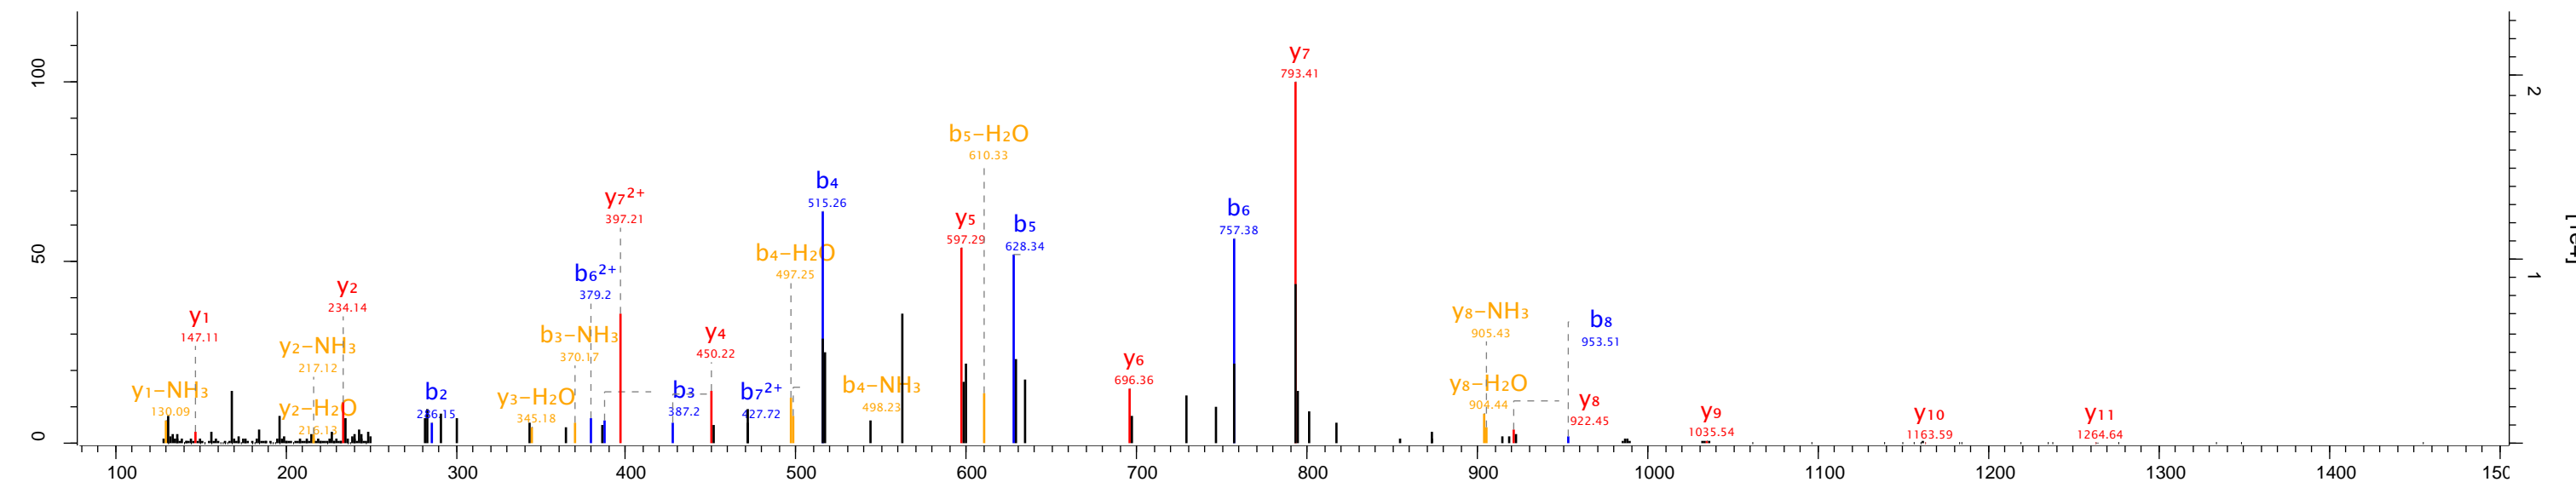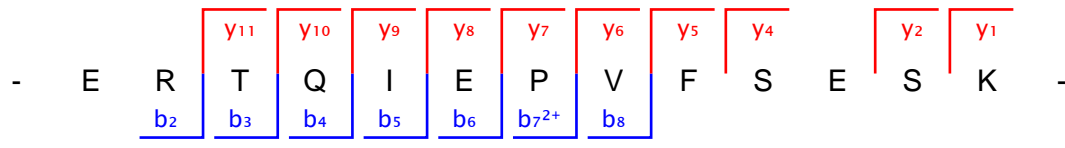

Spectral Annotation for Single-Peptide IDs between Single D11 Cells using Q-OT-LIT

Raw file: 2015-01-08\_CL03\_Blastomere-15  
 Scan: 30906 Method: ITMS; HCD Score: 120.29 m/z: 517.27

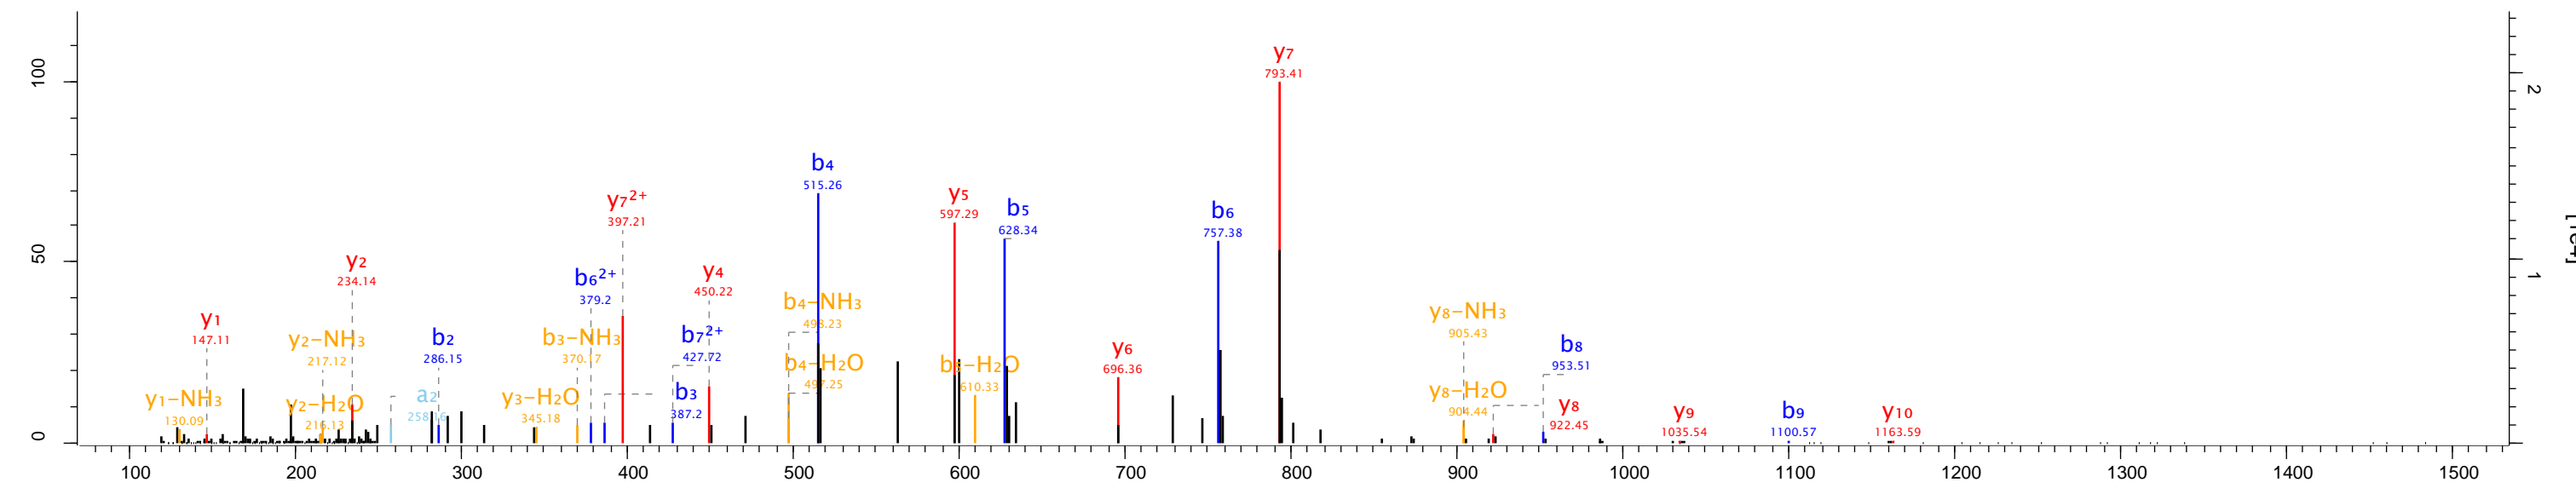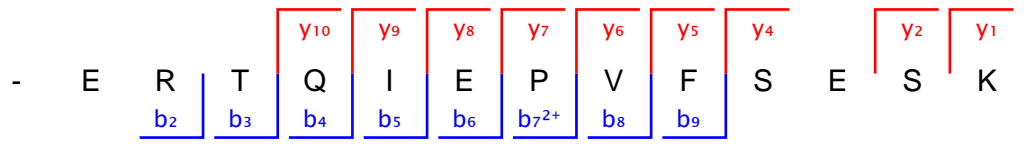

Spectral Annotation for Single-Peptide IDs between Single D11 Cells using Q-OT-LIT

Raw file 2015-01-08\_CL03\_Blastomere-15 Scan 30919 Method ITMS; HCD Score 104.81 m/z 517.26

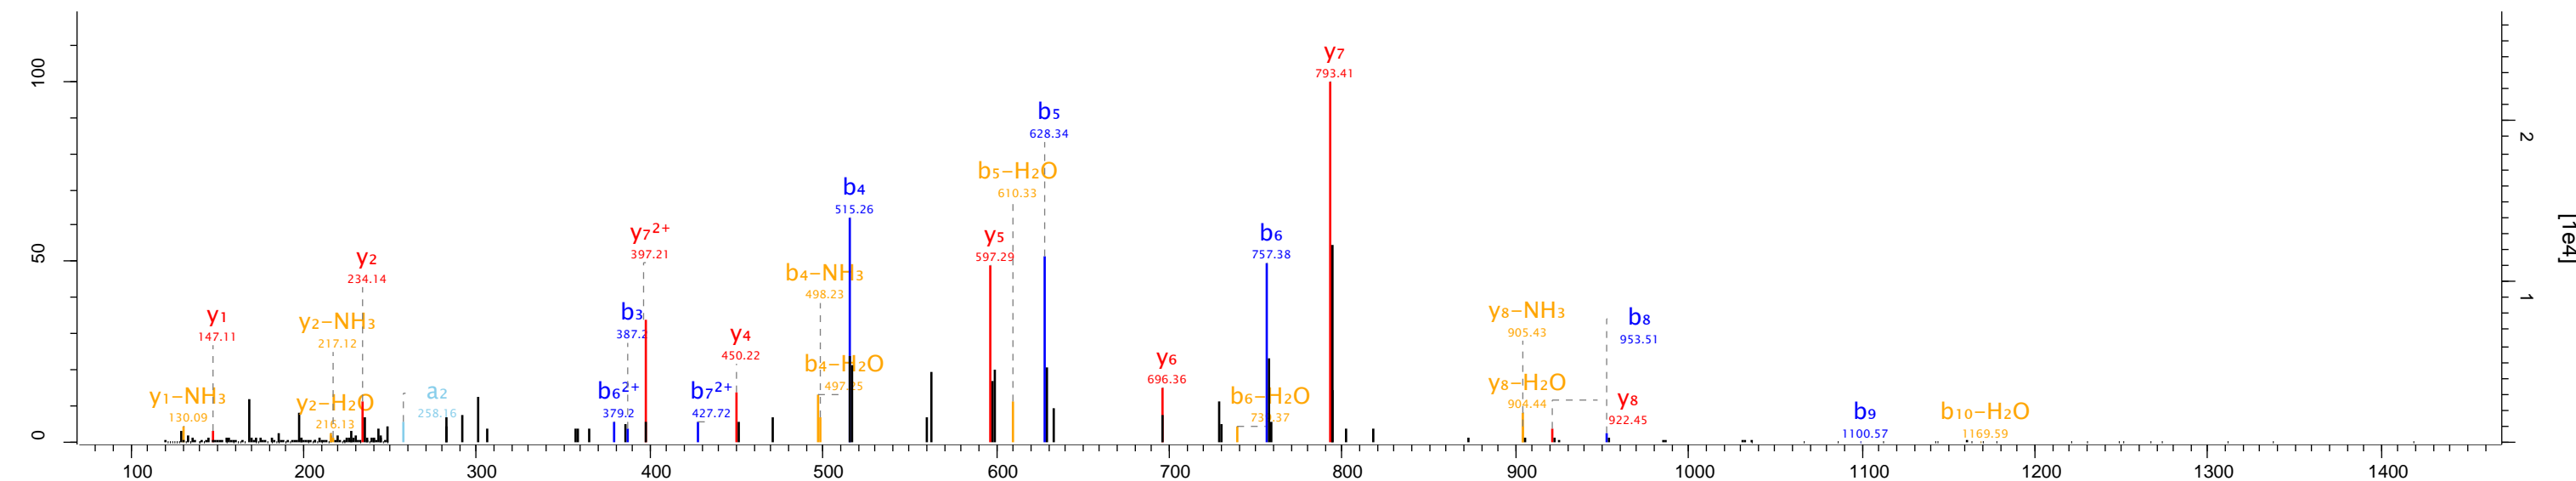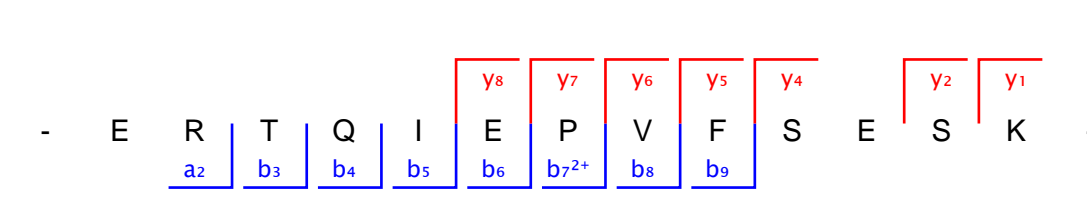

Spectral Annotation for Single-Peptide IDs between Single D11 Cells using Q-OT-LIT

Raw file 2015-01-08\_CL03\_Blastomere-15 Scan 30937 Method ITMS; HCD Score 124.81 m/z 517.27

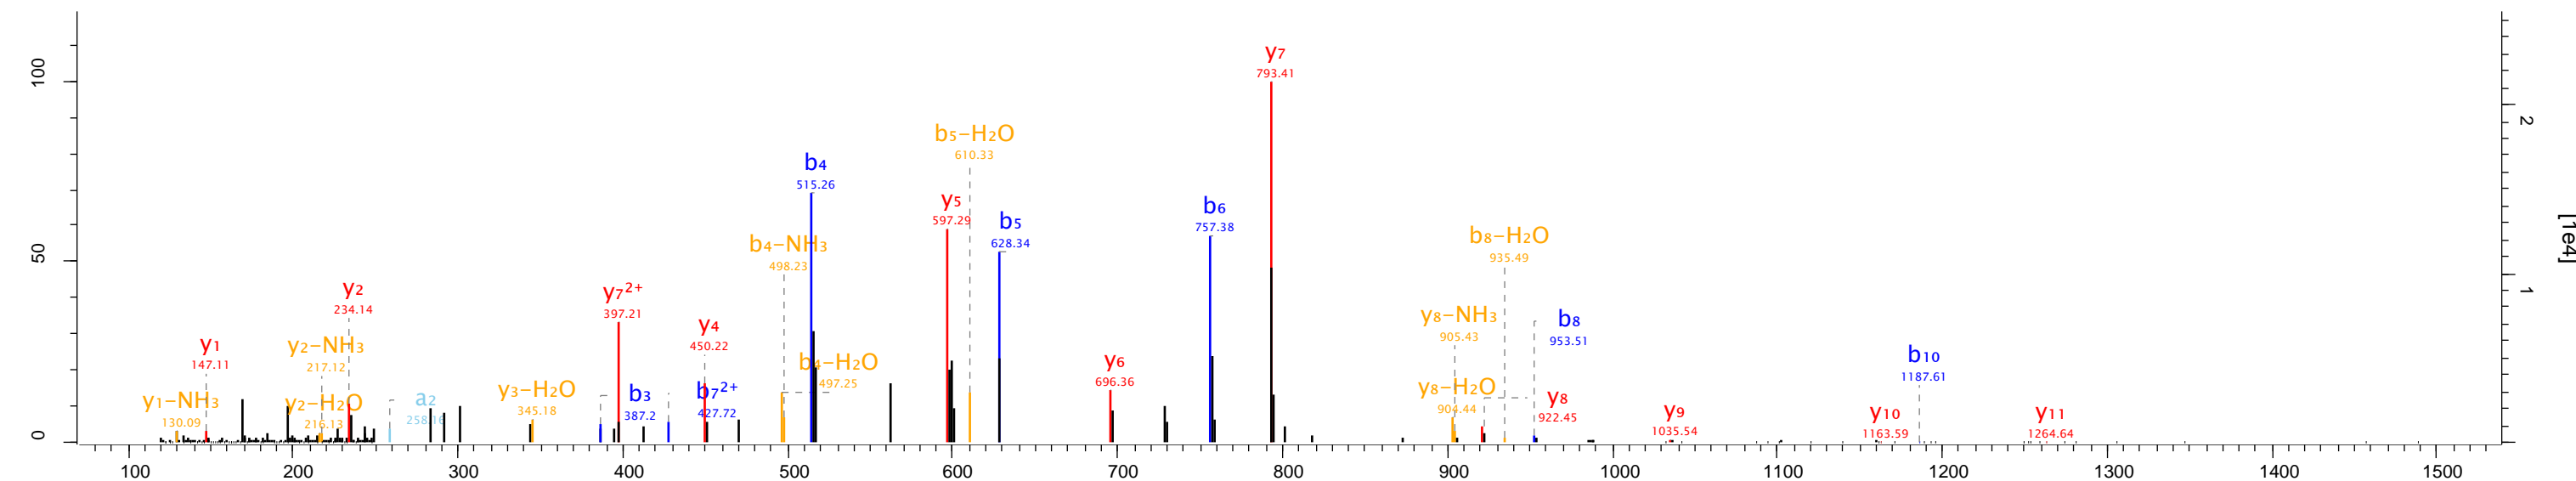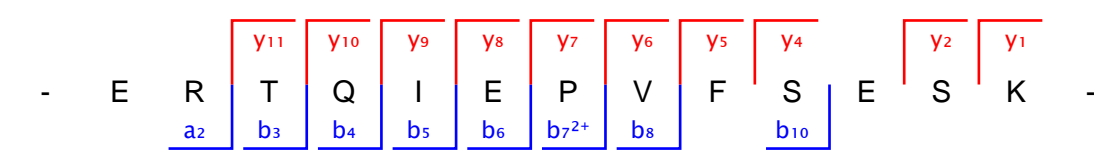

Spectral Annotation for Single-Peptide IDs between Single D11 Cells using Q-OT-LIT

Raw file 2015-01-08\_CL03\_Blastomere-15 Scan 31207 Method ITMS; HCD Score 50.09 m/z 541.95

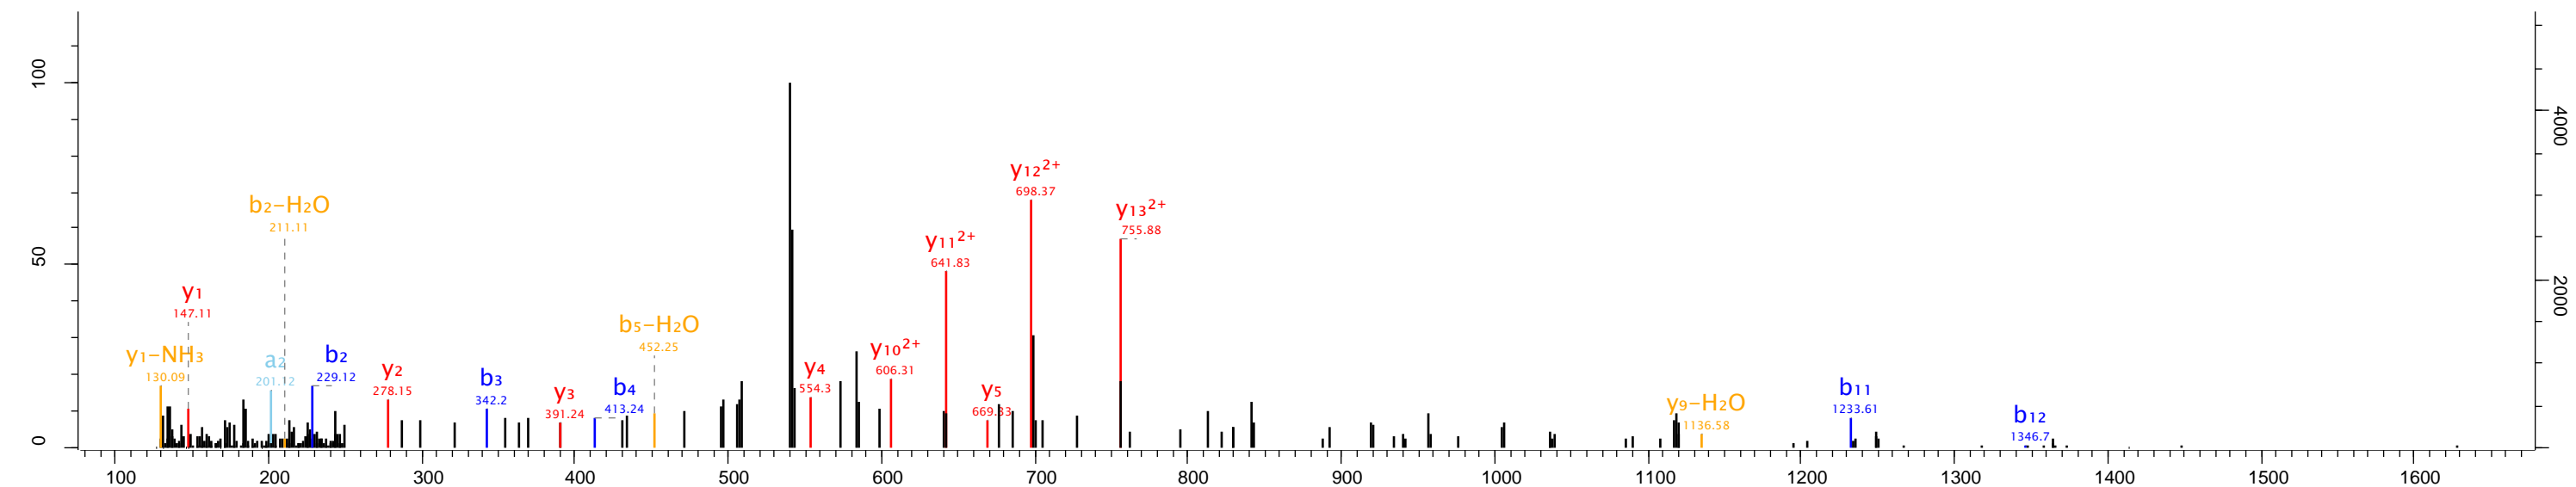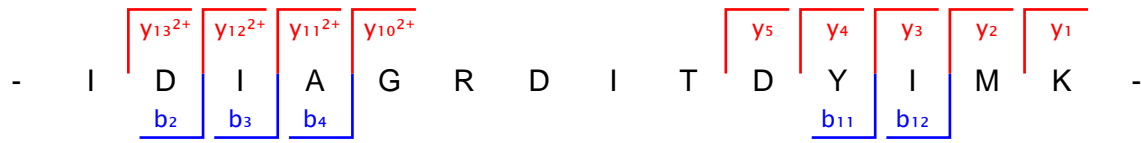

Spectral Annotation for Single-Peptide IDs between Single D11 Cells using Q-OT-LIT



Raw file 2015-01-08\_CL03\_Blastomere-15 Scan 31357 Method ITMS; HCD Score 58.32 m/z 554.31

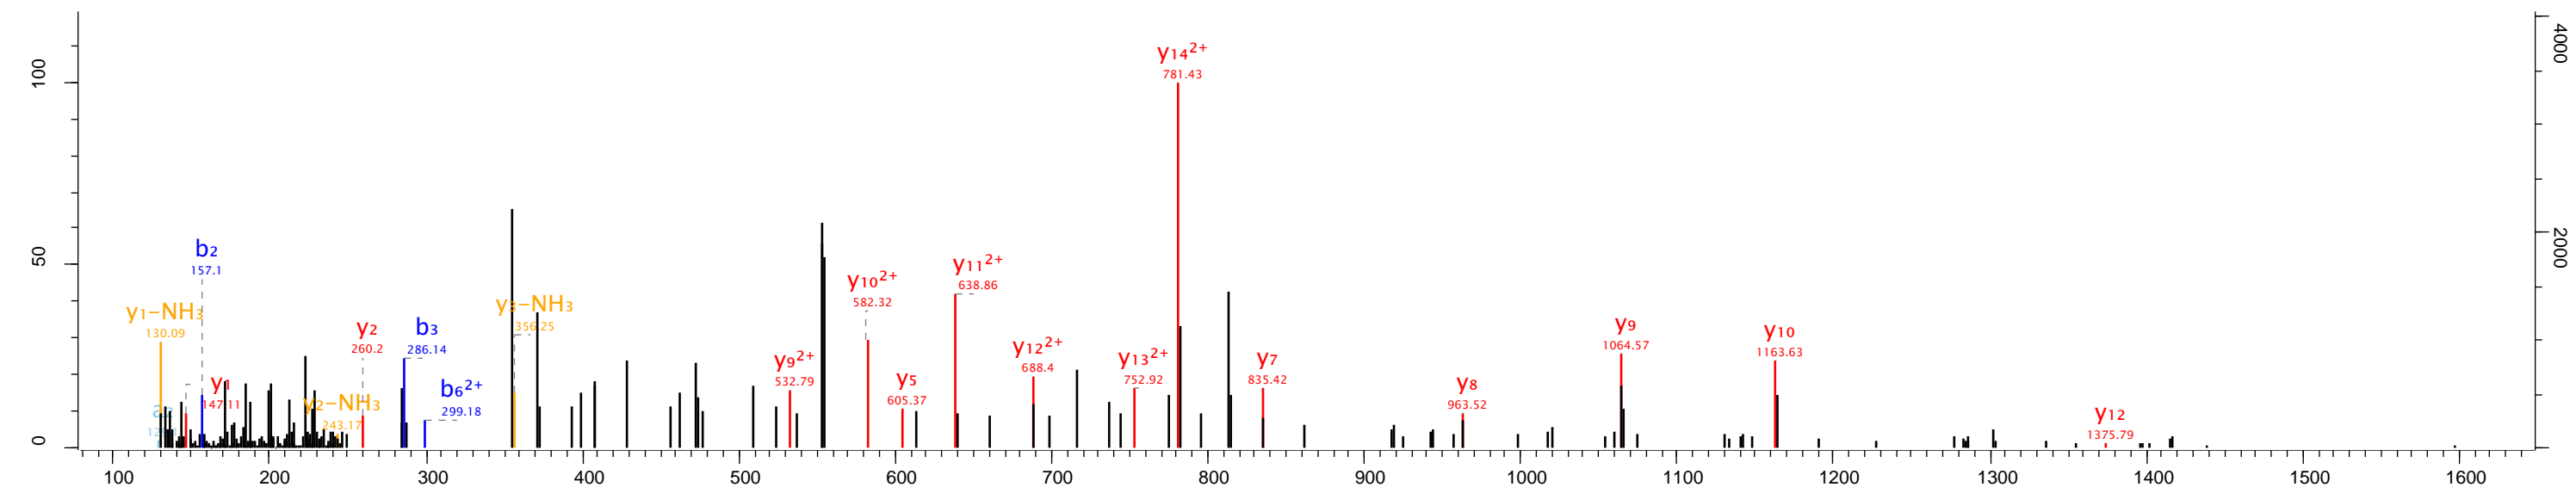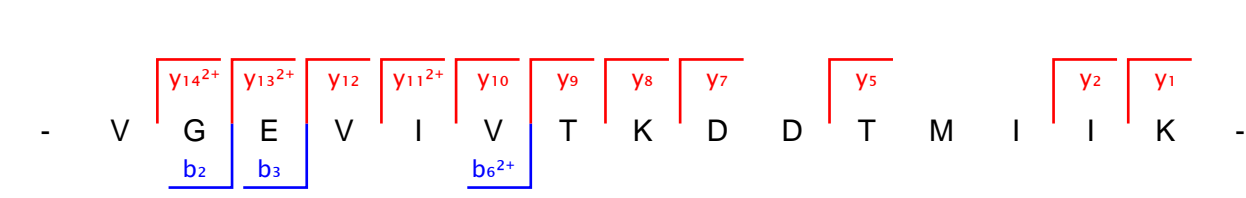

Spectral Annotation for Single-Peptide IDs between Single D11 Cells using Q-OT-LIT

Raw file: 2015-01-08\_CL03\_Blastomere-15  
 Scan: 31516 Method: ITMS; HCD Score: 95.82 m/z: 421.76

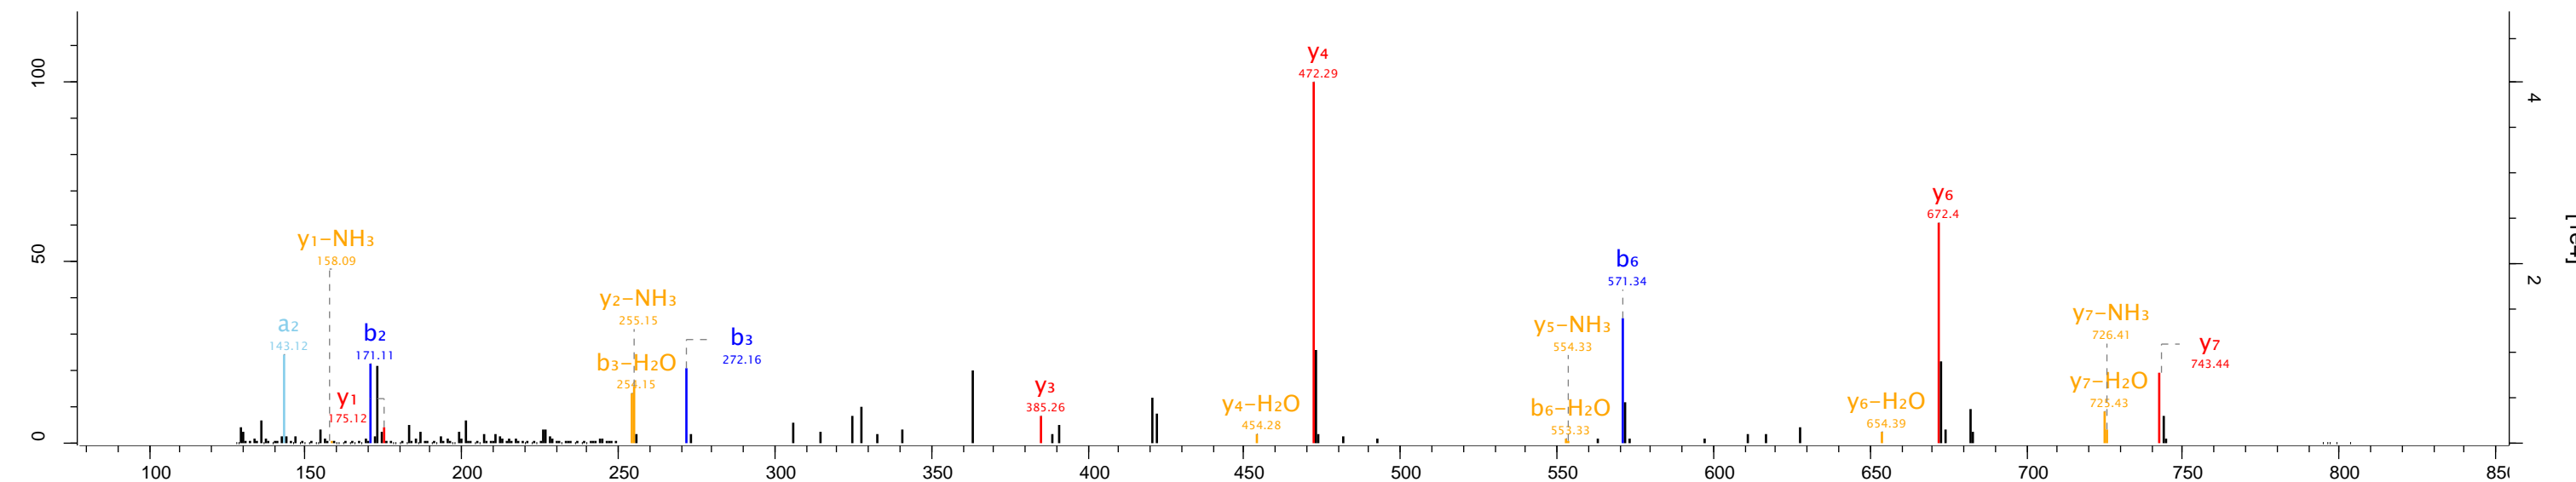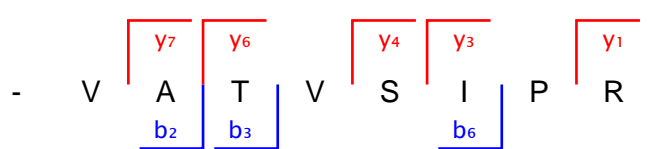

Raw file: 2015-01-08\_CL03\_Blastomere-15  
 Scan: 31533 Method: ITMS; HCD Score: 89.35 m/z: 421.76

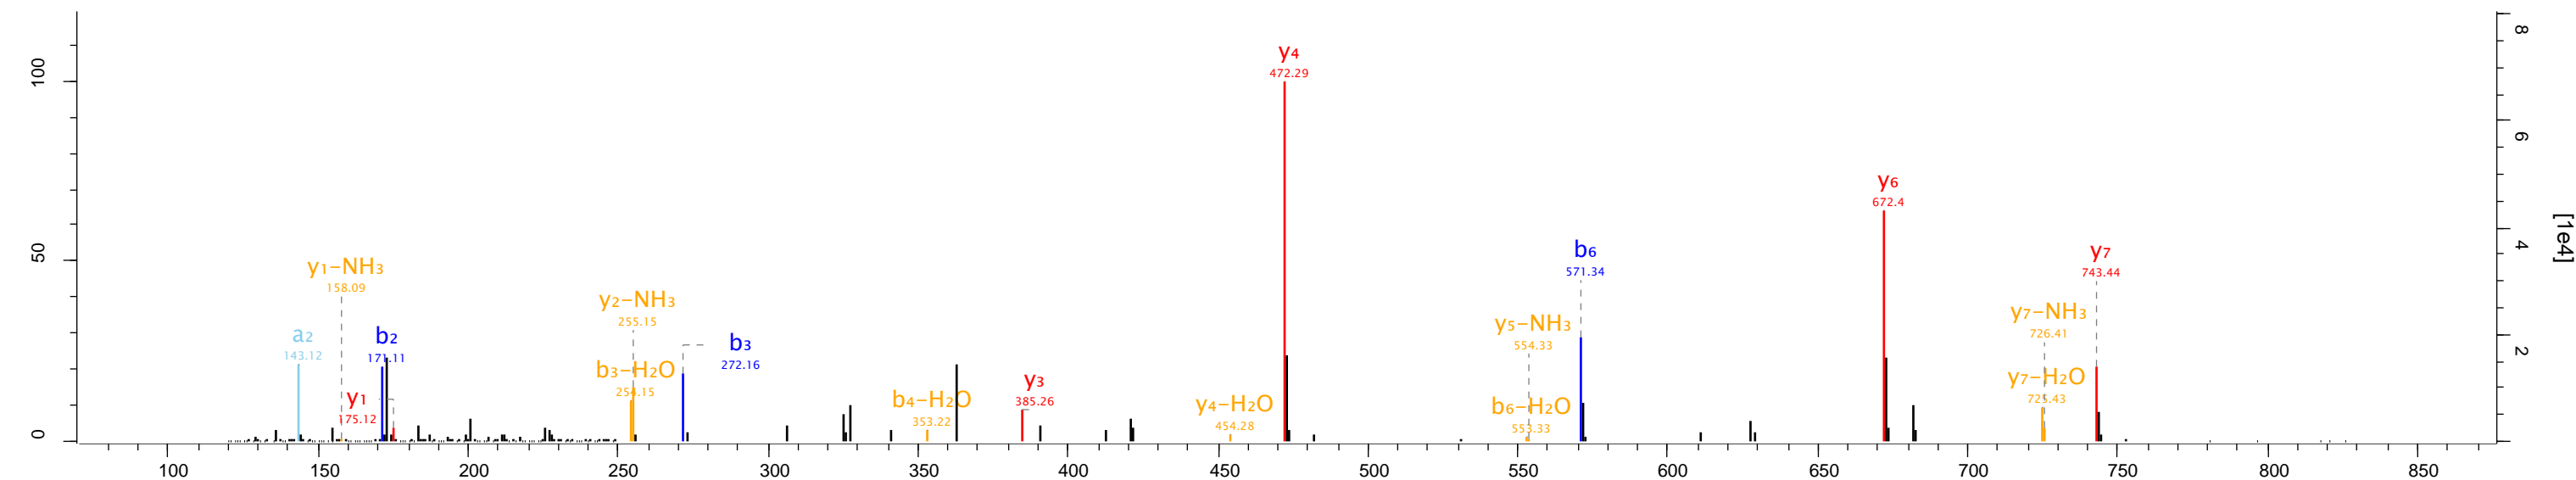

Raw file 2015-01-08\_CL03\_Blastomere-15 Scan 31553 Method ITMS; HCD Score 91.07 m/z 421.76

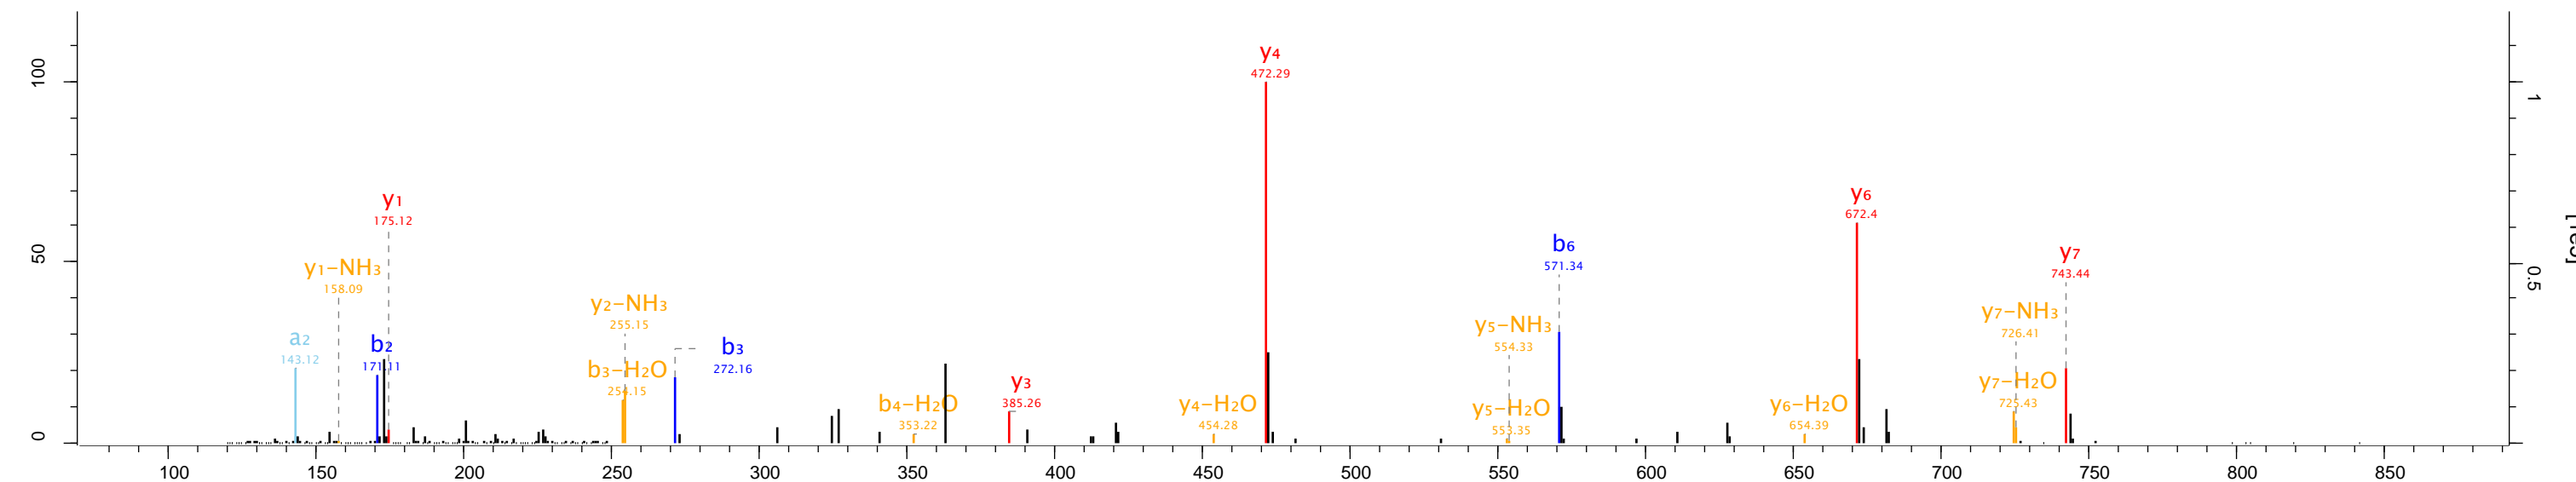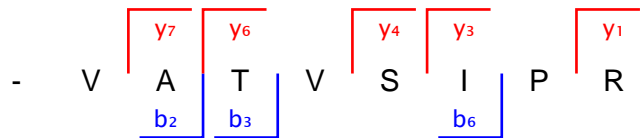

Spectral Annotation for Single-Peptide IDs between Single D11 Cells using Q-OT-LIT

Raw file 2015-01-08\_CL03\_Blastomere-15 Scan 31734 Method ITMS; HCD Score 107.01 m/z 421.76

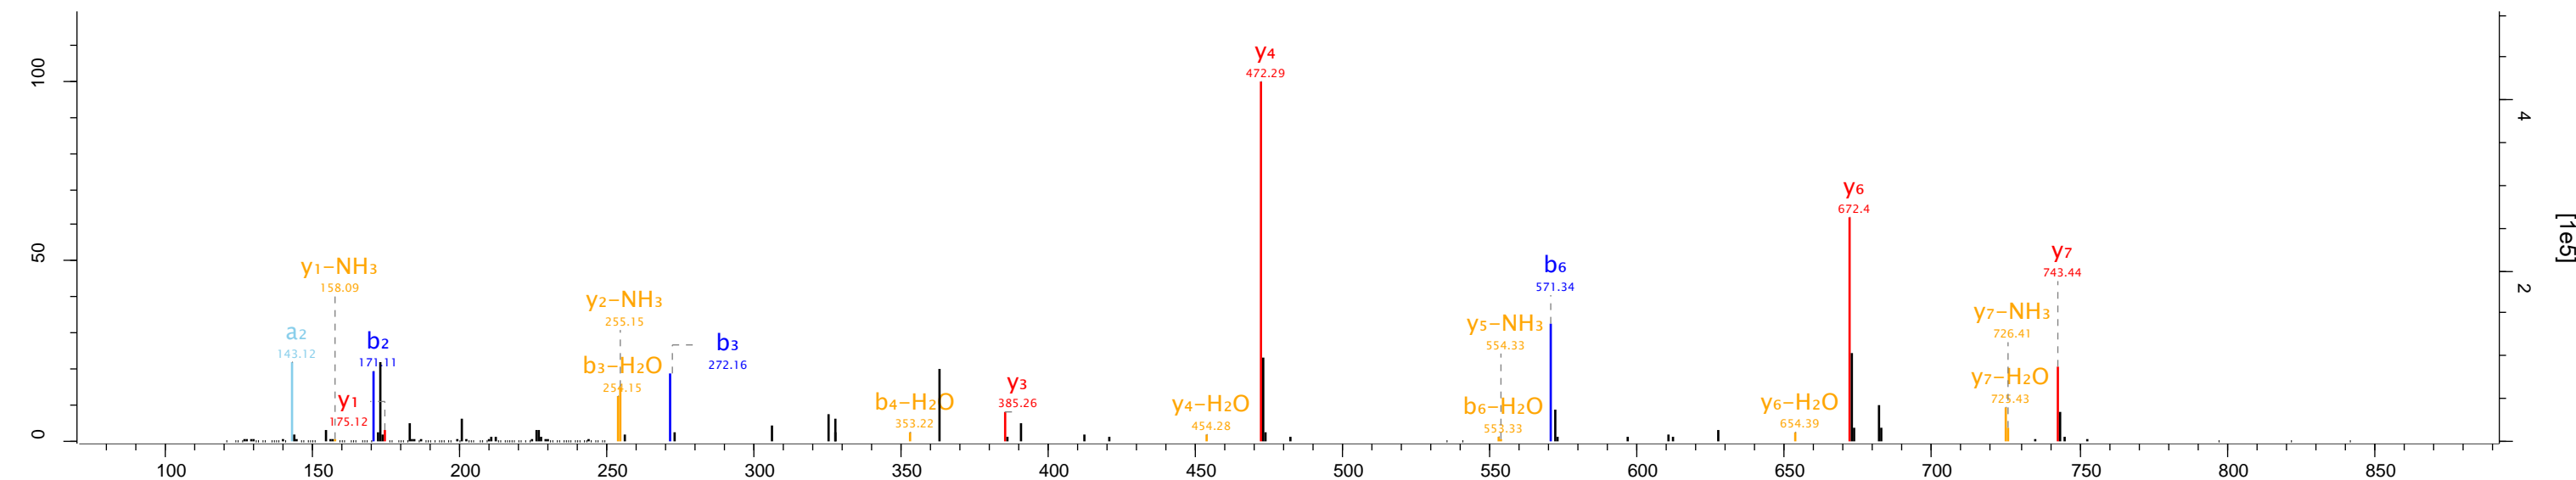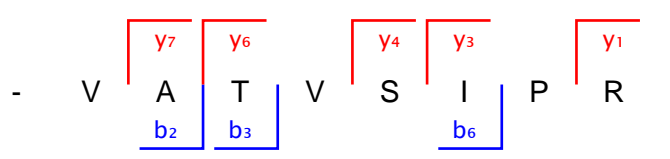

Spectral Annotation for Single-Peptide IDs between Single D11 Cells using Q-OT-LIT

Raw file 2015-01-08\_CL03\_Blastomere-15 Scan 31838 Method ITMS; HCD Score 89.35 m/z 421.76

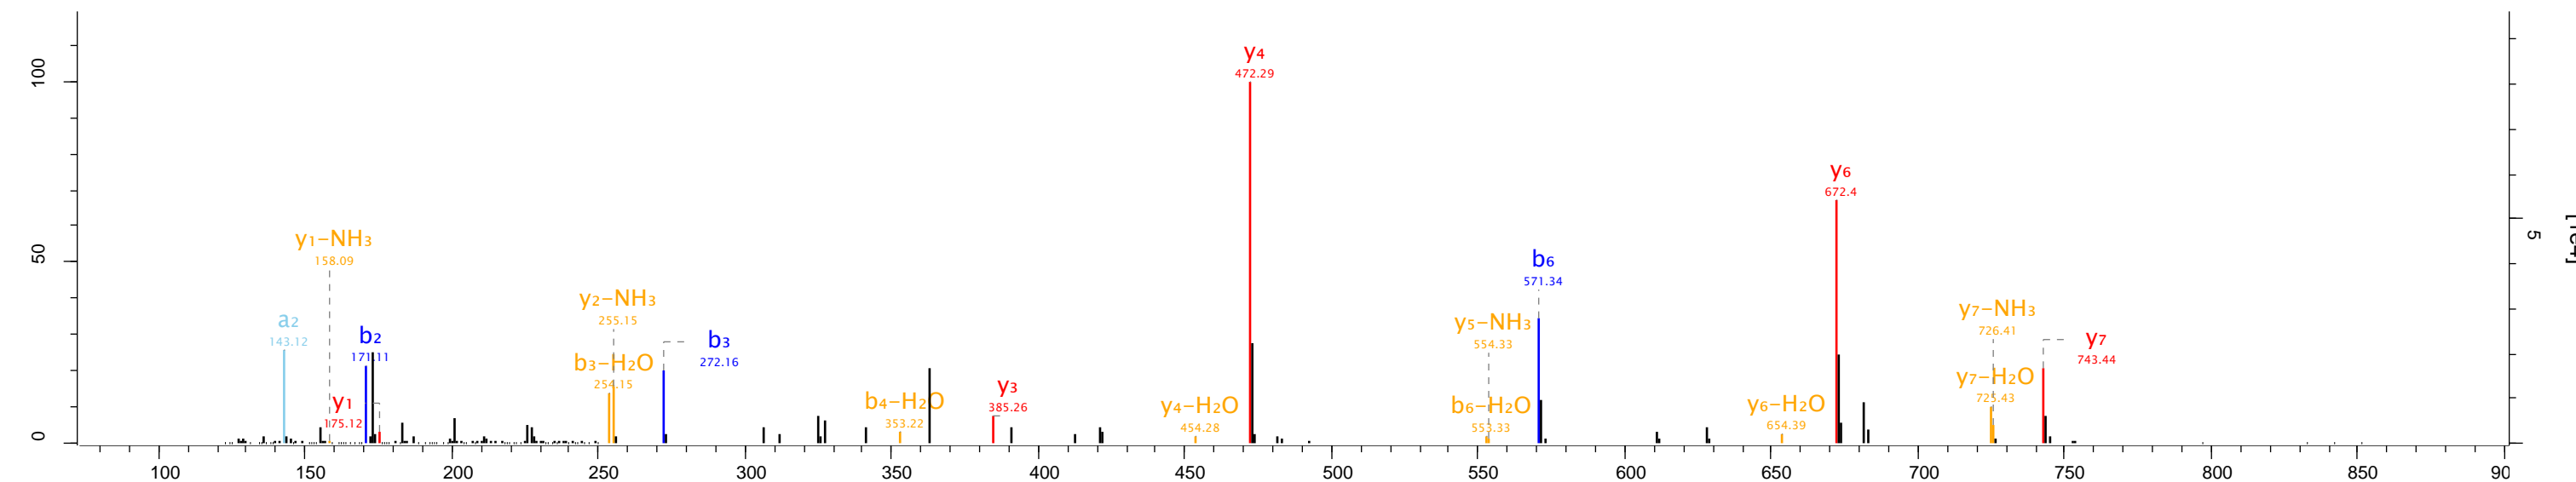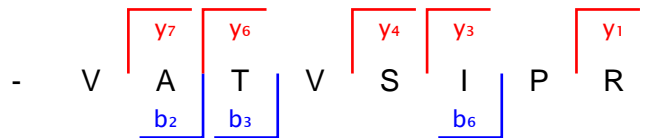

Raw file 2015-01-08\_CL03\_Blastomere-15 Scan 31914 Method ITMS; HCD Score 62.16 m/z 624.32

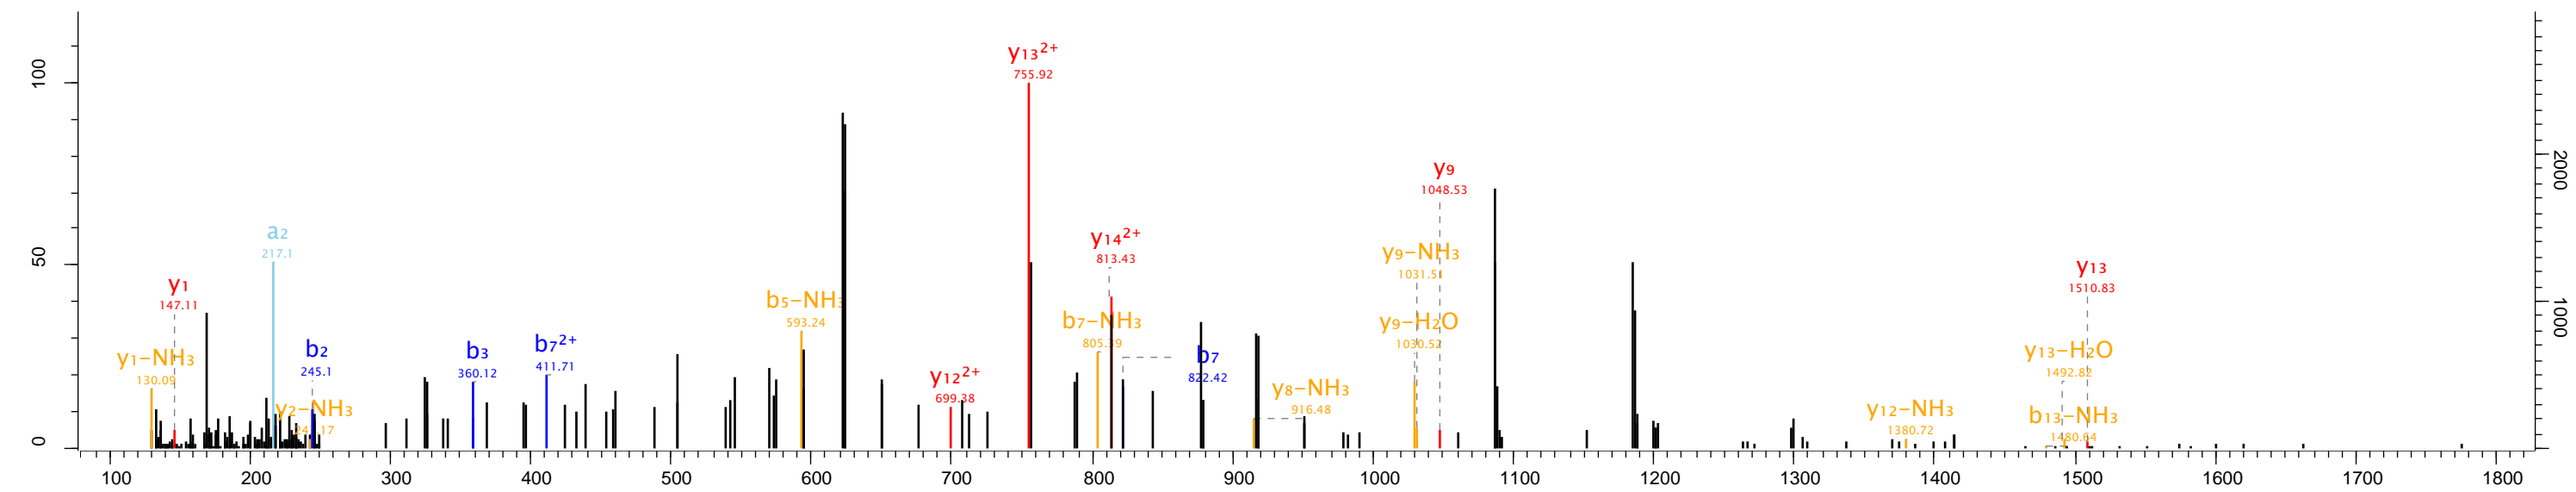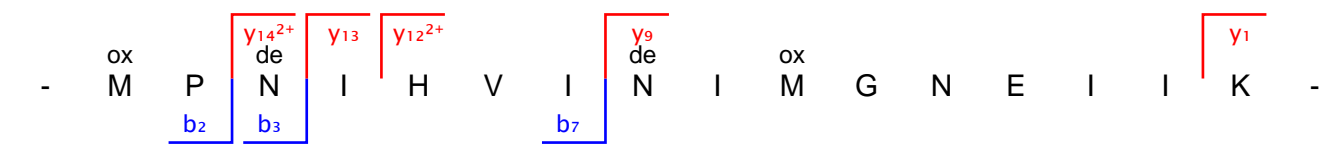

Spectral Annotation for Single-Peptide IDs between Single D11 Cells using Q-OT-LIT

Raw file Scan Method Score m/z  
 2015-01-08\_CL03\_Blastomere-15 31917 ITMS; HCD 82.43 422.26

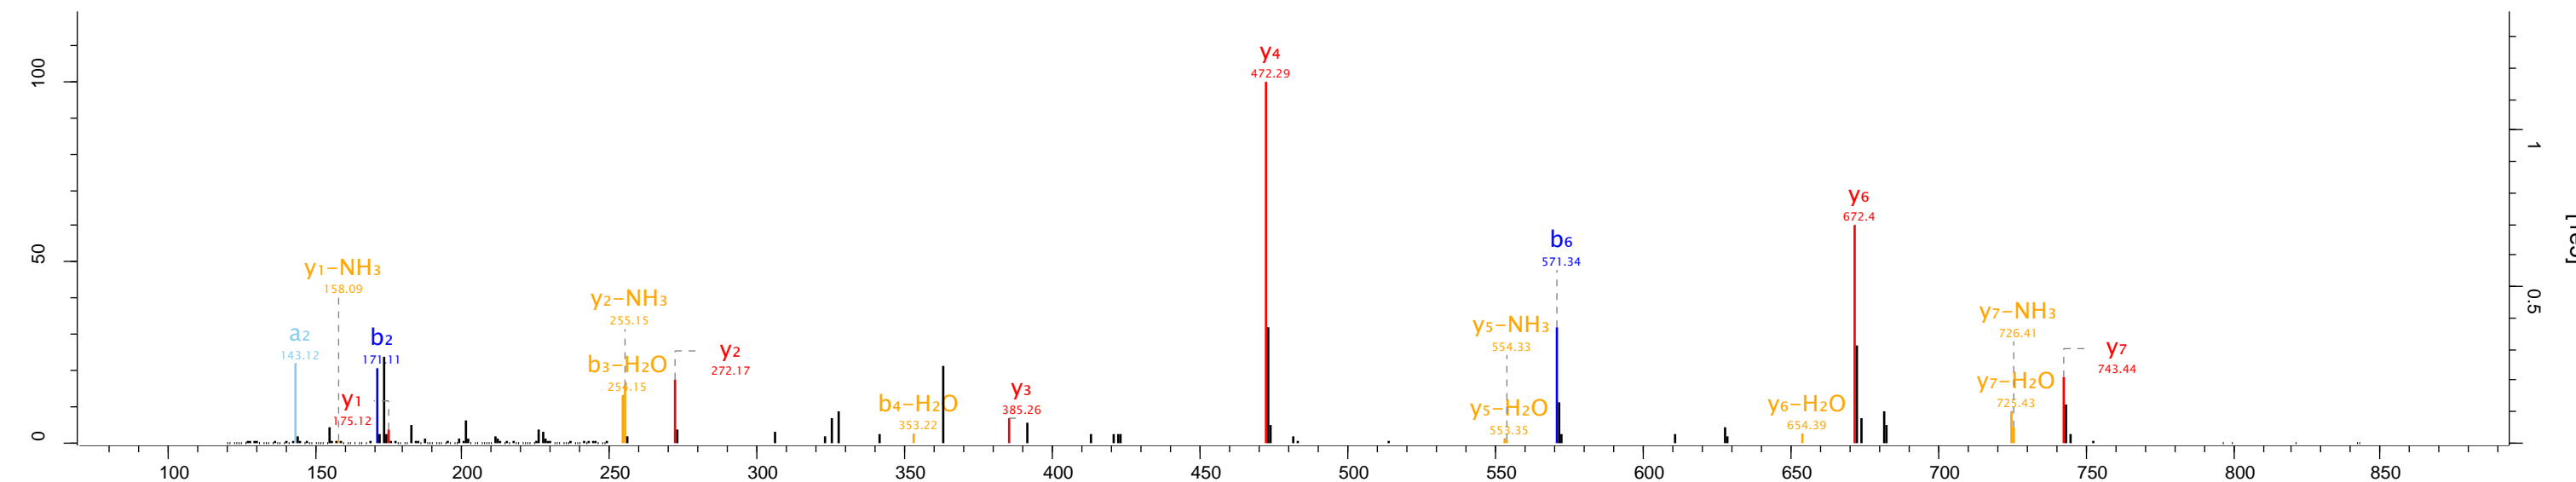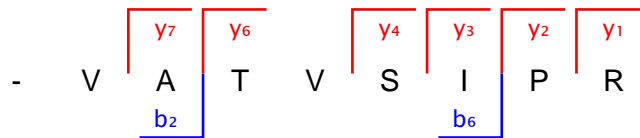



Raw file 2015-01-08\_CL03\_Blastomere-15 Scan 32110 Method ITMS; HCD Score 55.82 m/z 588.34

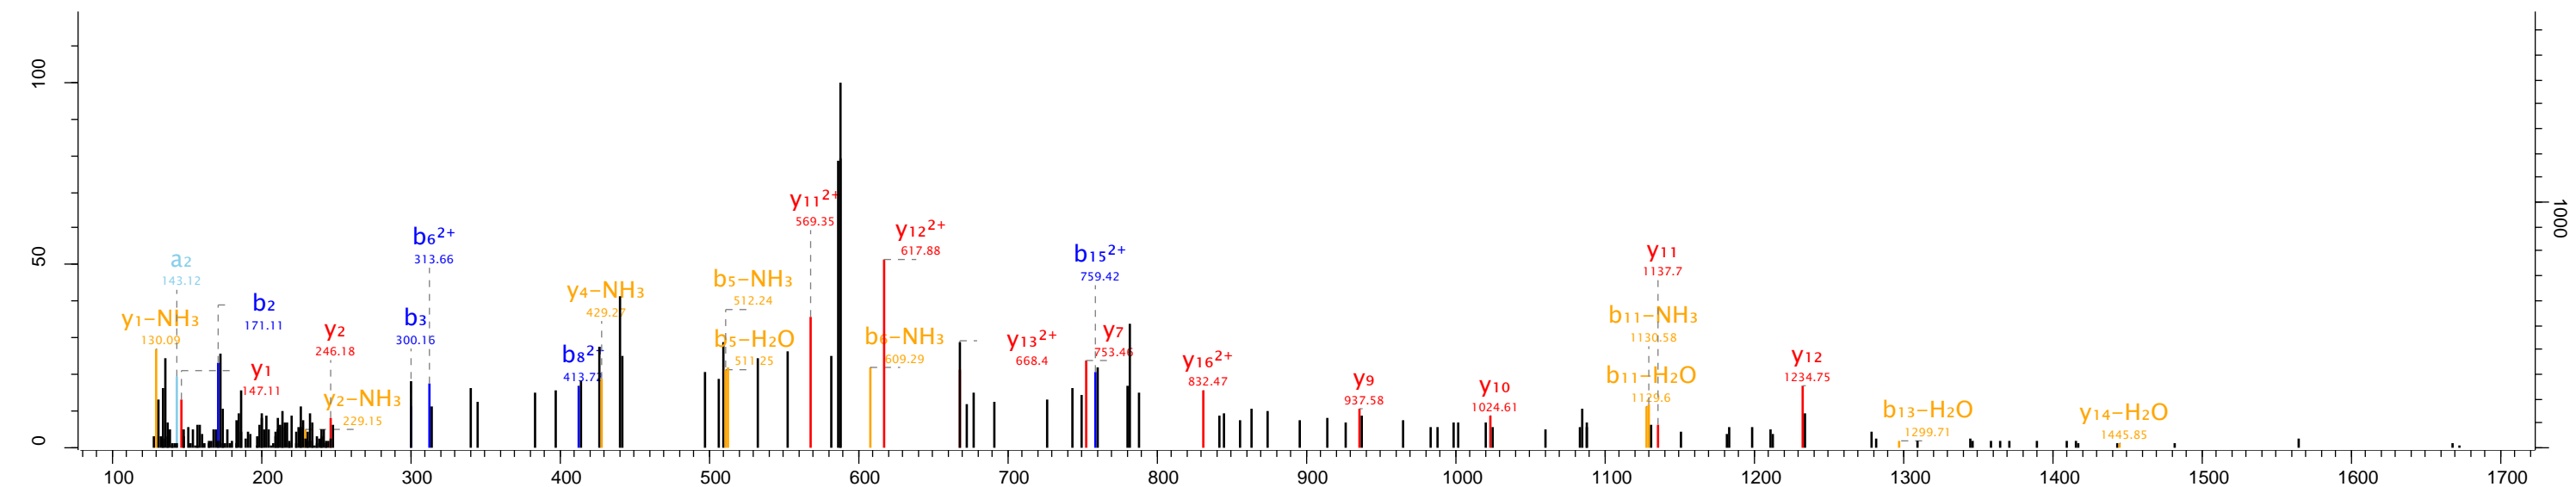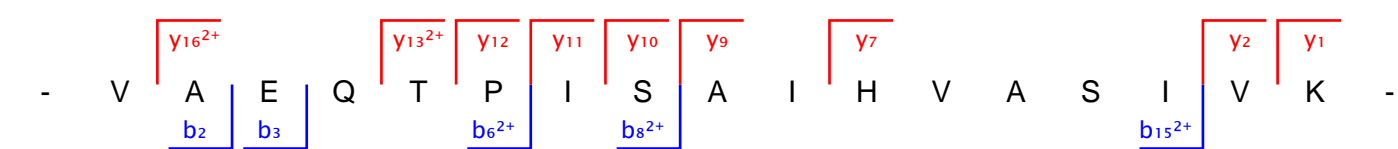

Spectral Annotation for Single-Peptide IDs between Single D11 Cells using Q-OT-LIT

Raw file: 2015-01-08\_CL03\_Blastomere-15  
 Scan: 32121 Method: ITMS; HCD Score: 89.35 m/z: 421.76

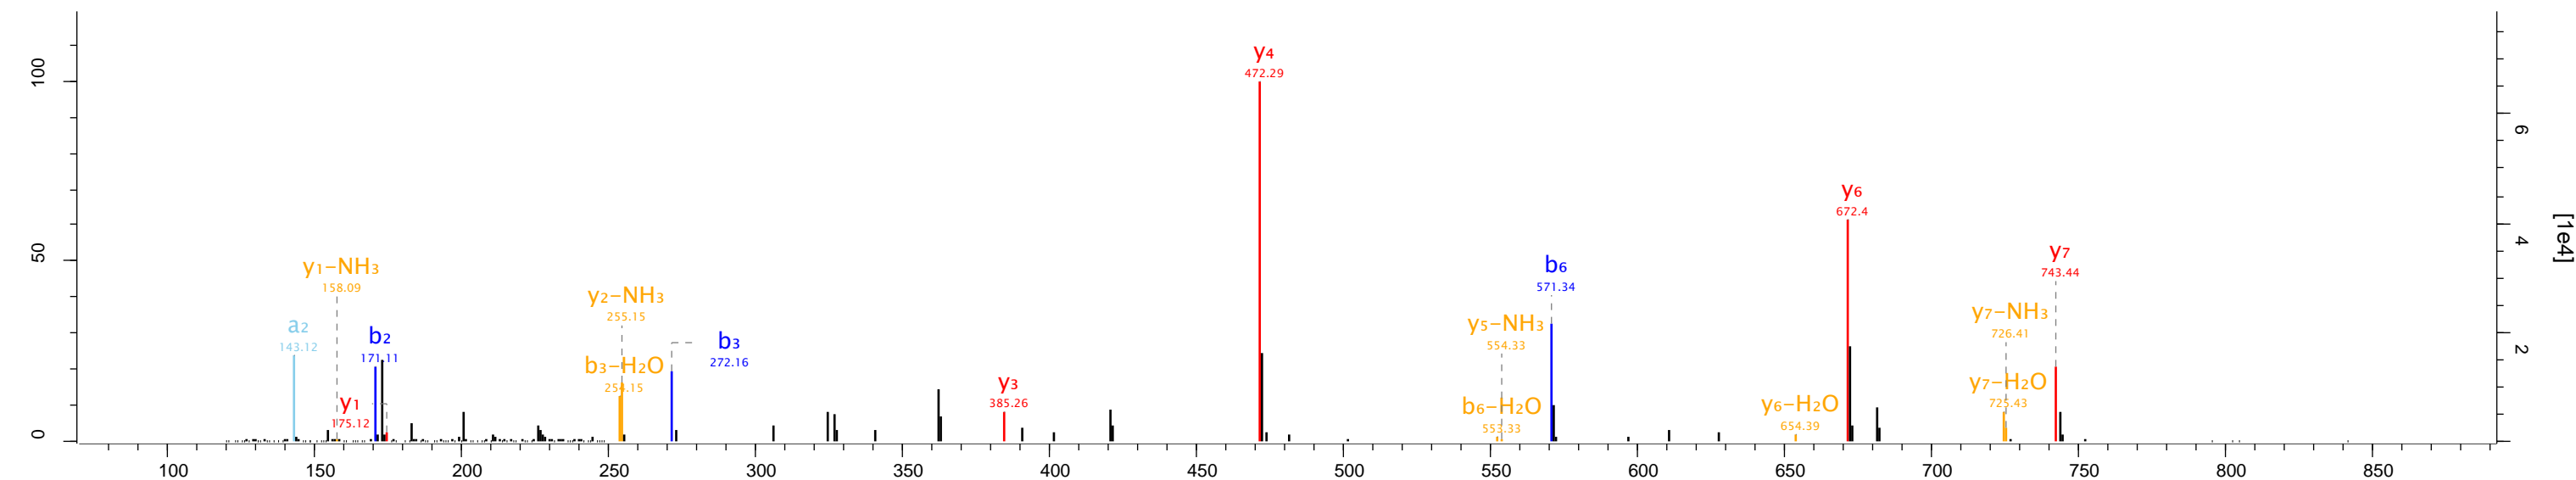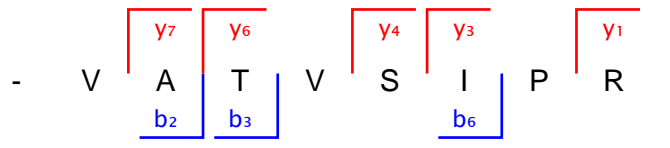

Raw file: 2015-01-08\_CL03\_Blastomere-15  
 Scan: 32141 Method: ITMS; HCD Score: 34.93 m/z: 588.34

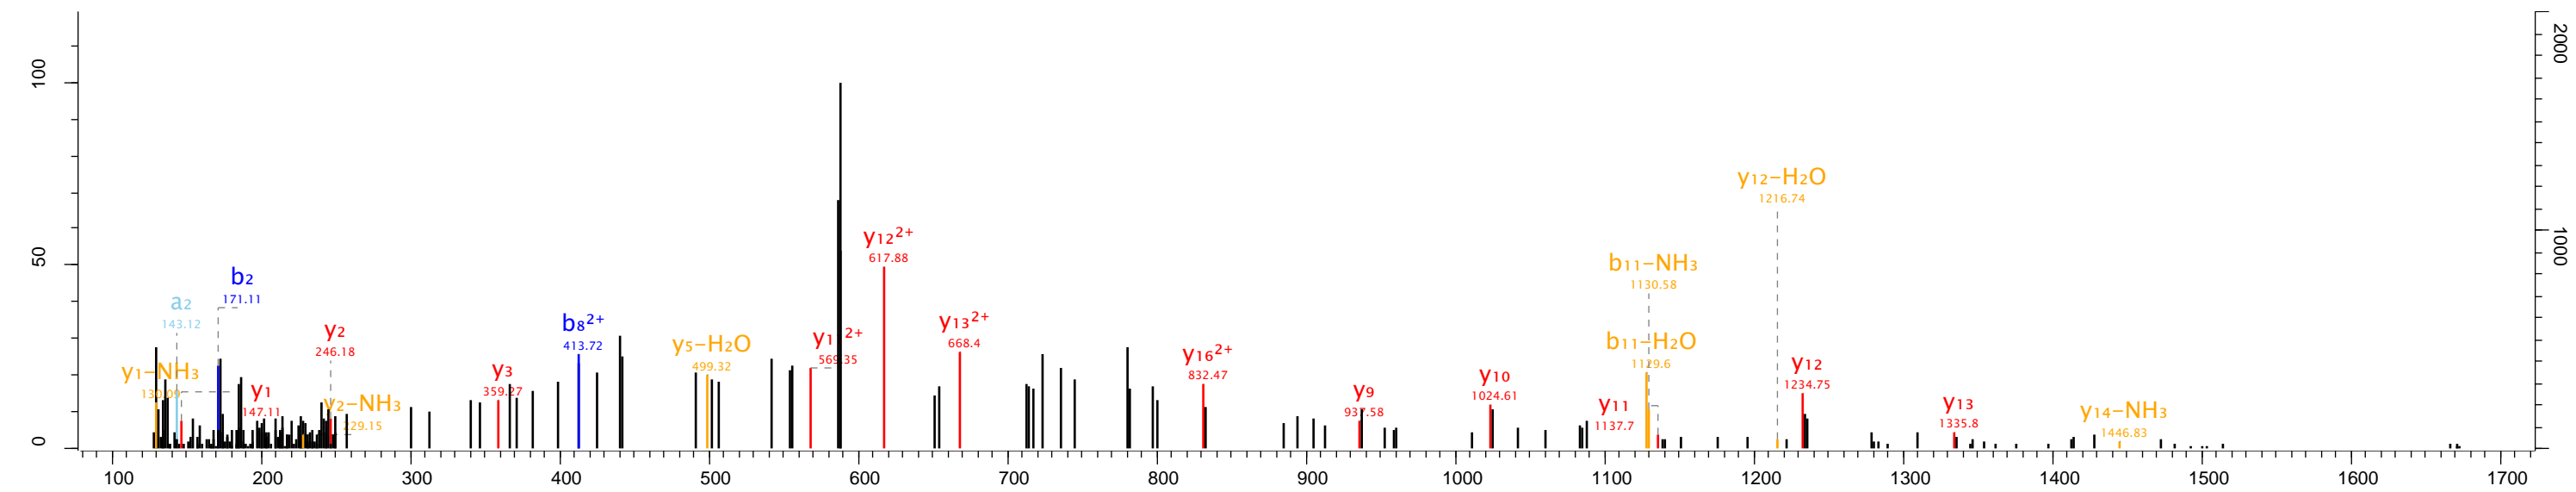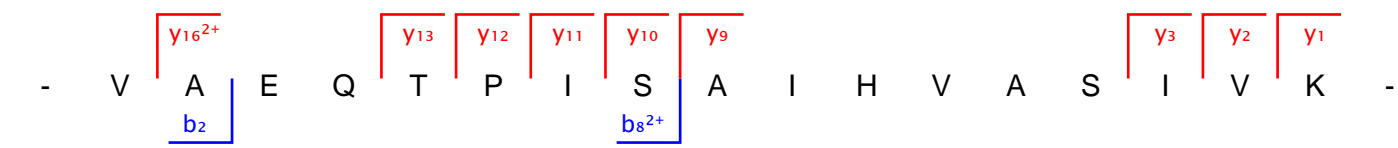

Spectral Annotation for Single-Peptide IDs between Single D11 Cells using Q-OT-LIT

Raw file 2015-01-08\_CL03\_Blastomere-15 Scan 32143 Method ITMS; HCD Score 44.13 m/z 585.96

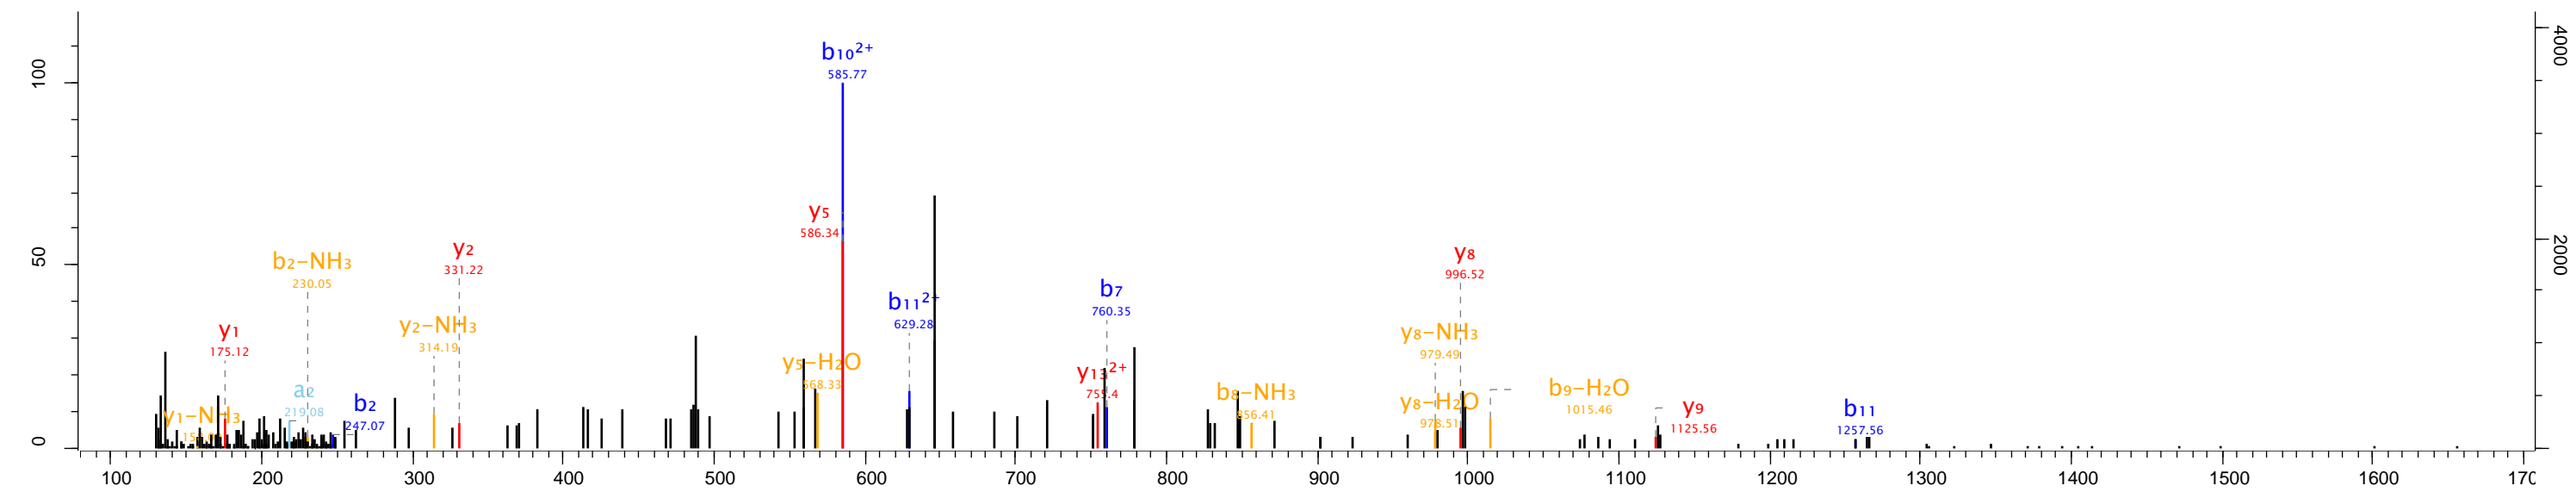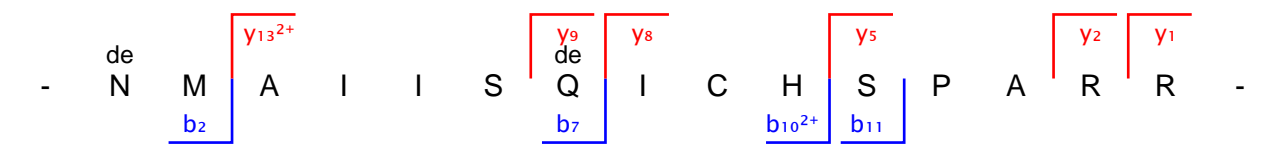

Spectral Annotation for Single-Peptide IDs between Single D11 Cells using Q-OT-LIT

Raw file 2015-01-08\_CL03\_Blastomere-15 Scan 32247 Method ITMS; HCD Score 46.8 m/z 585.95

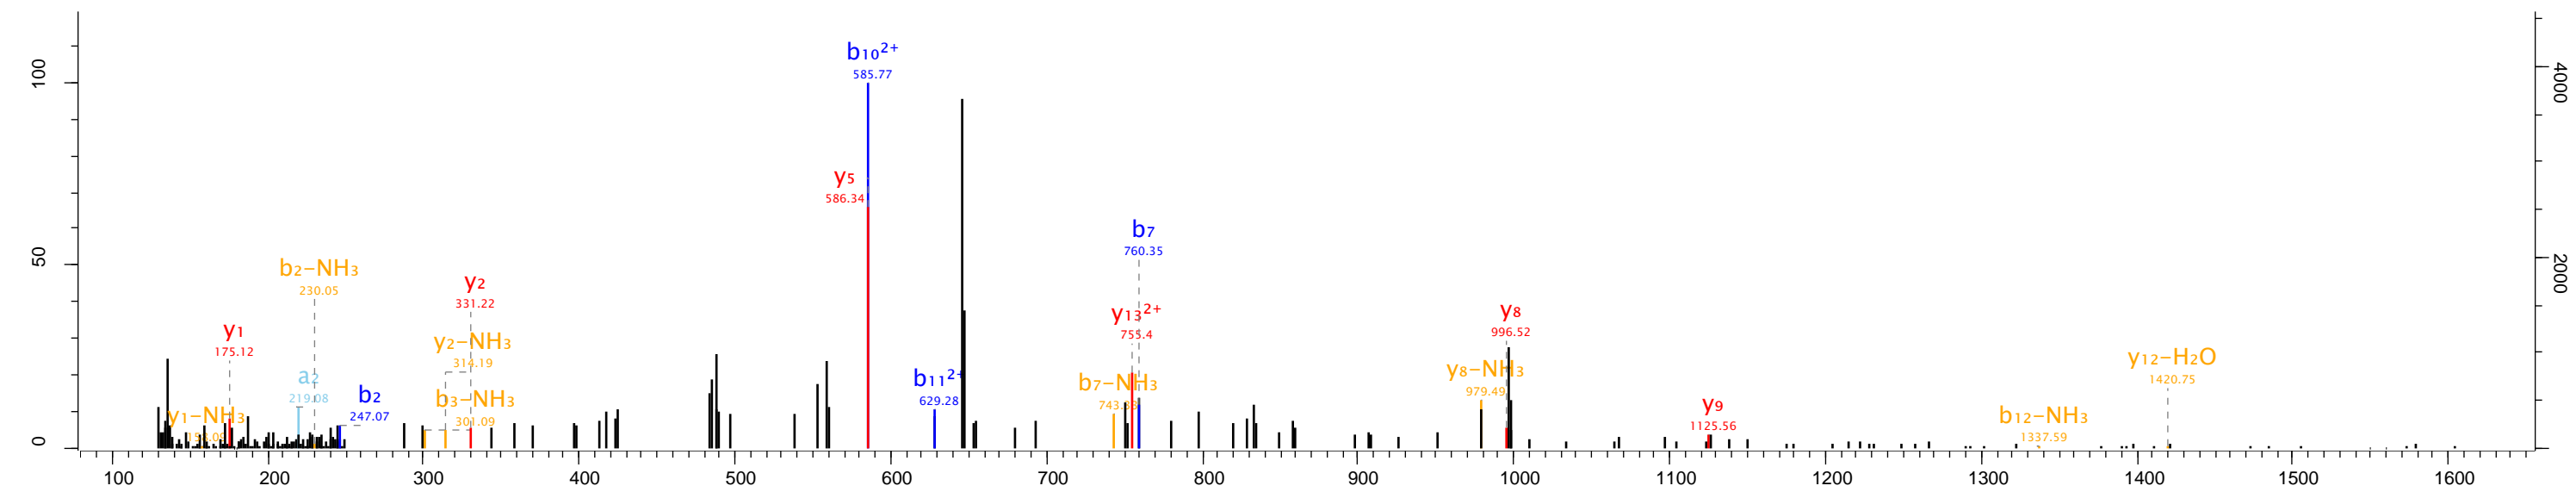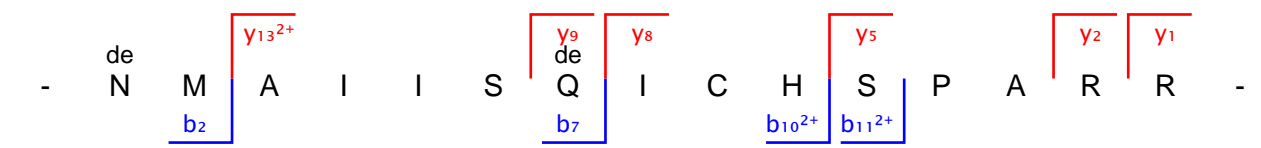

Spectral Annotation for Single-Peptide IDs between Single D11 Cells using Q-OT-LIT

Raw file 2015-01-08\_CL03\_Blastomere-15 Scan 32269 Method ITMS; HCD Score 64.57 m/z 590.66

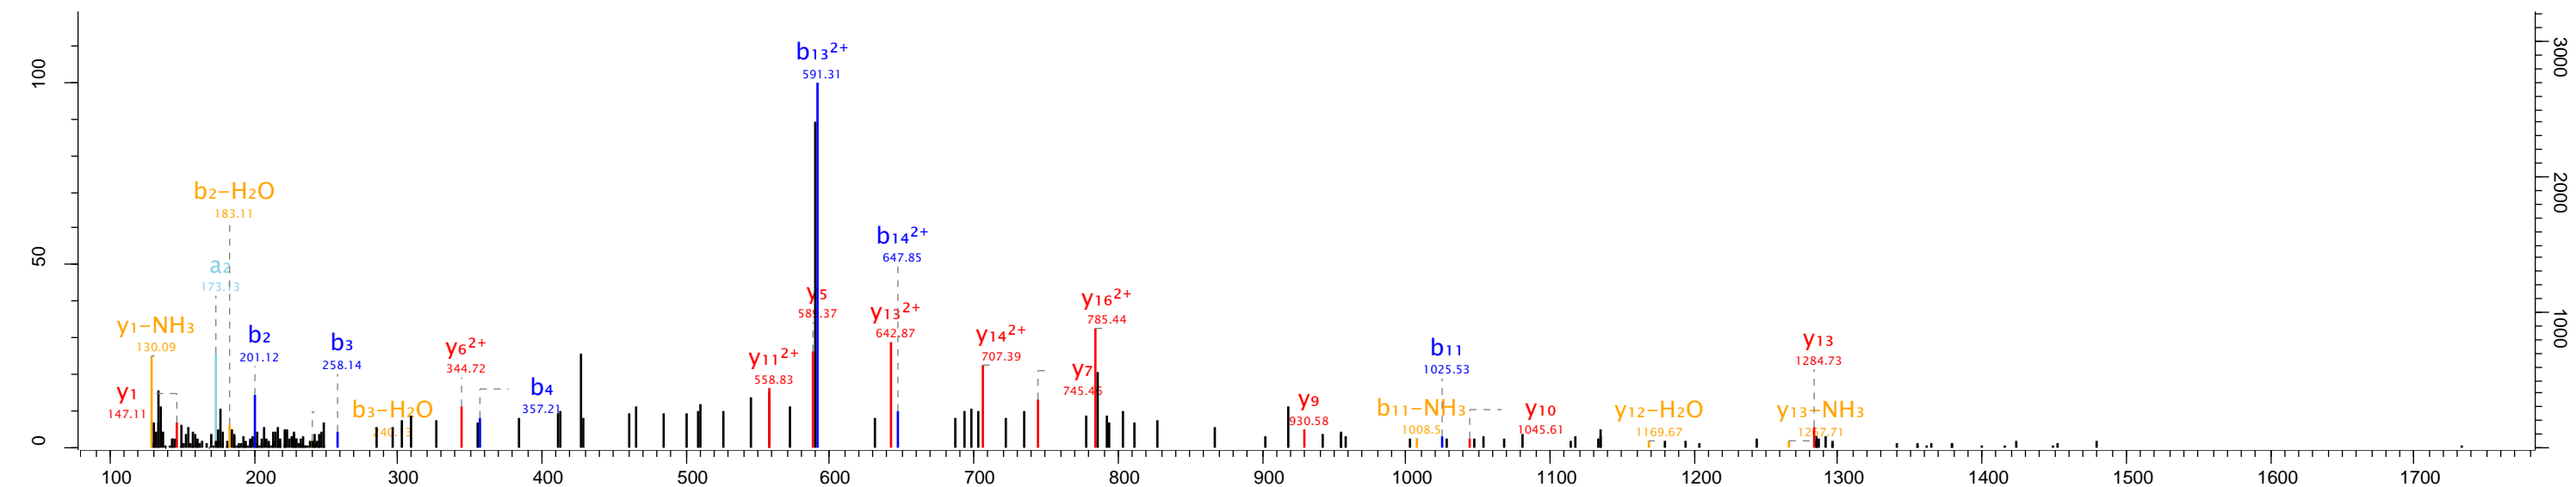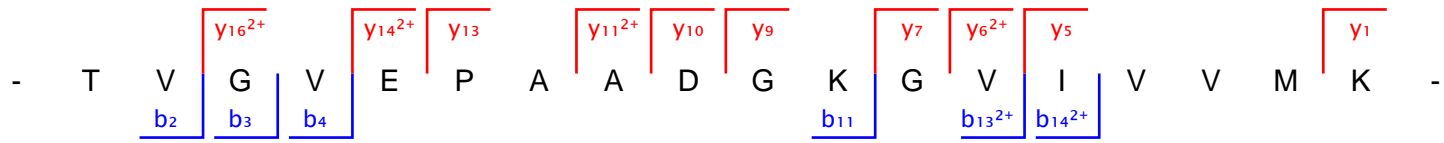

Spectral Annotation for Single-Peptide IDs between Single D11 Cells using Q-OT-LIT

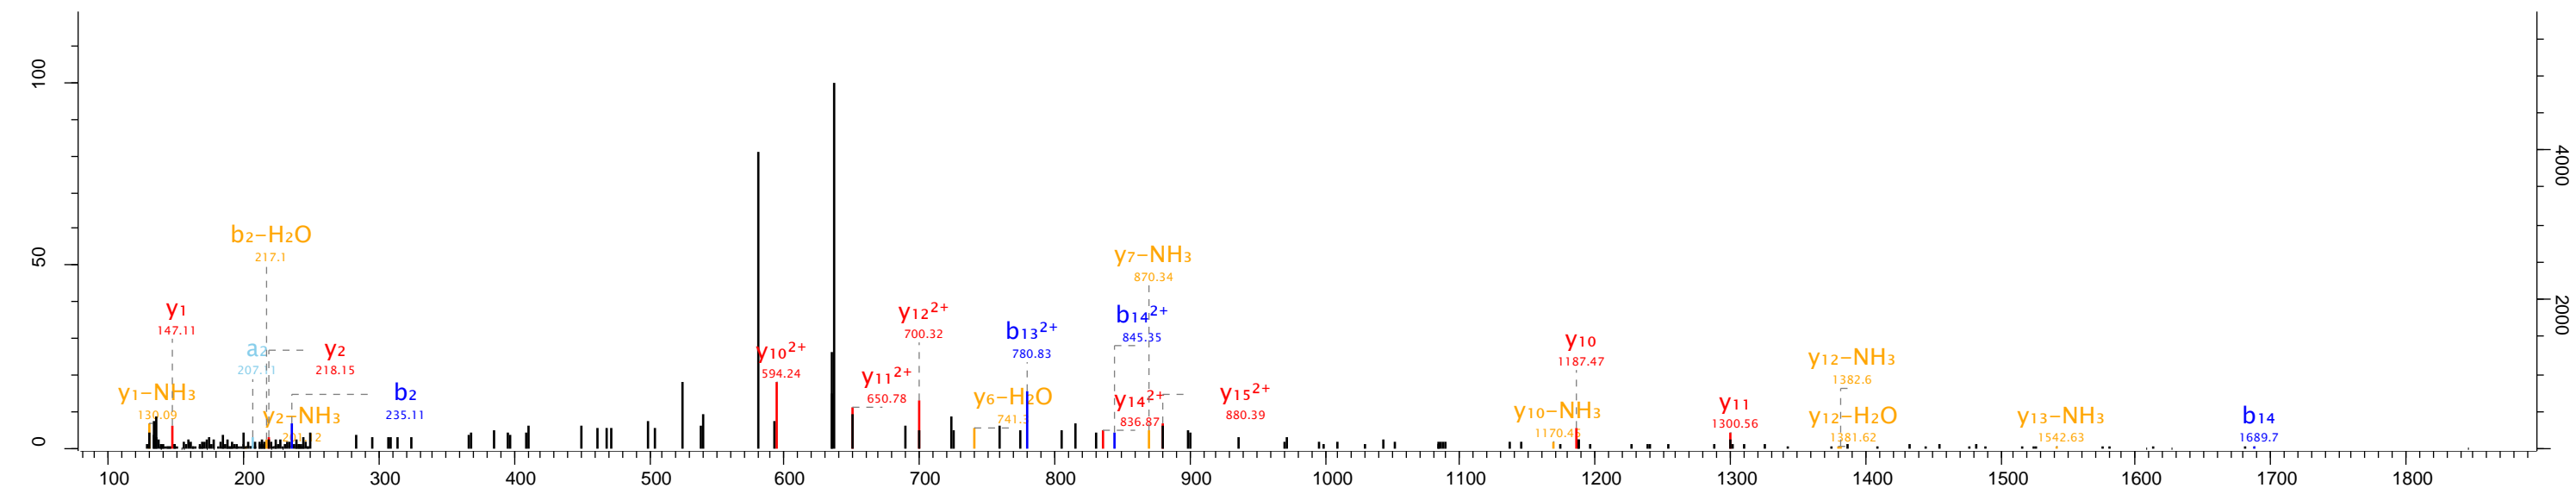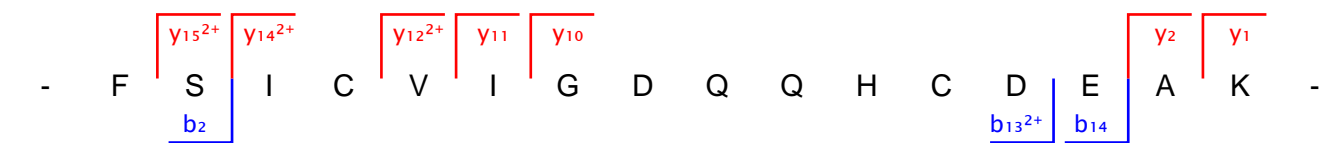

Raw file 2015-01-08\_CL03\_Blastomere-15 Scan 32379 Method ITMS; HCD Score 58.82 m/z 636.61

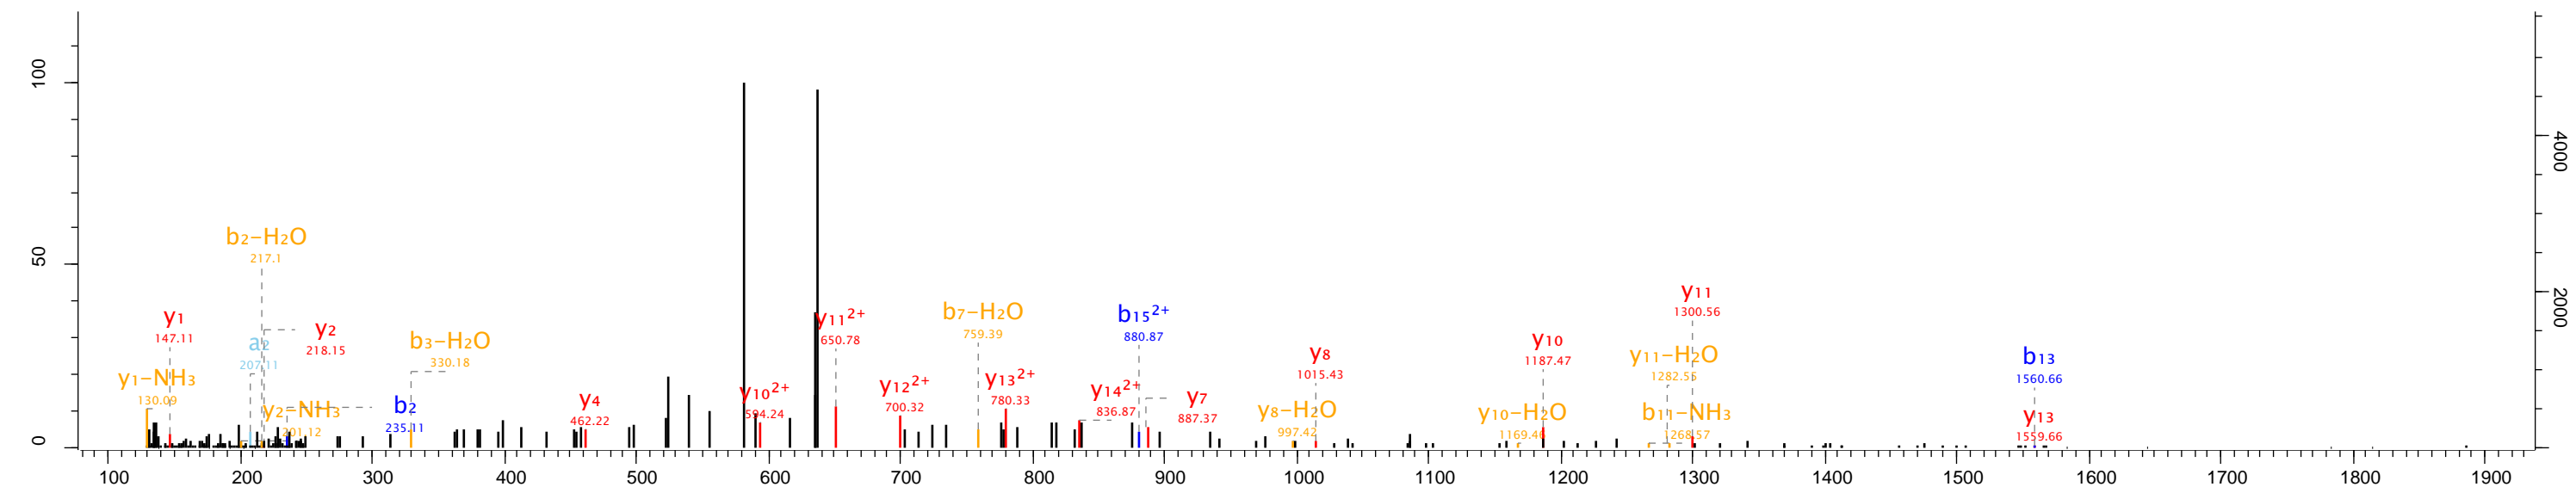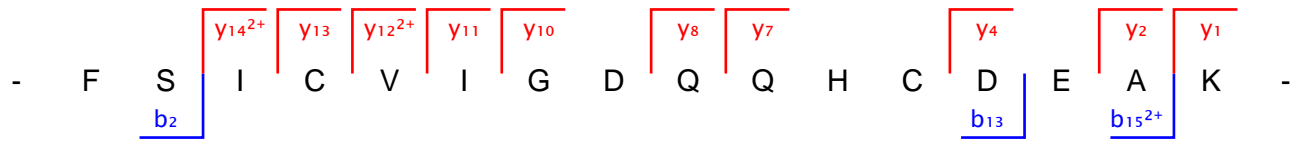

Spectral Annotation for Single-Peptide IDs between Single D11 Cells using Q-OT-LIT



Raw file 2015-01-08\_CL03\_Blastomere-15 Scan 32574 Method ITMS; HCD Score 40.19 m/z 588.34

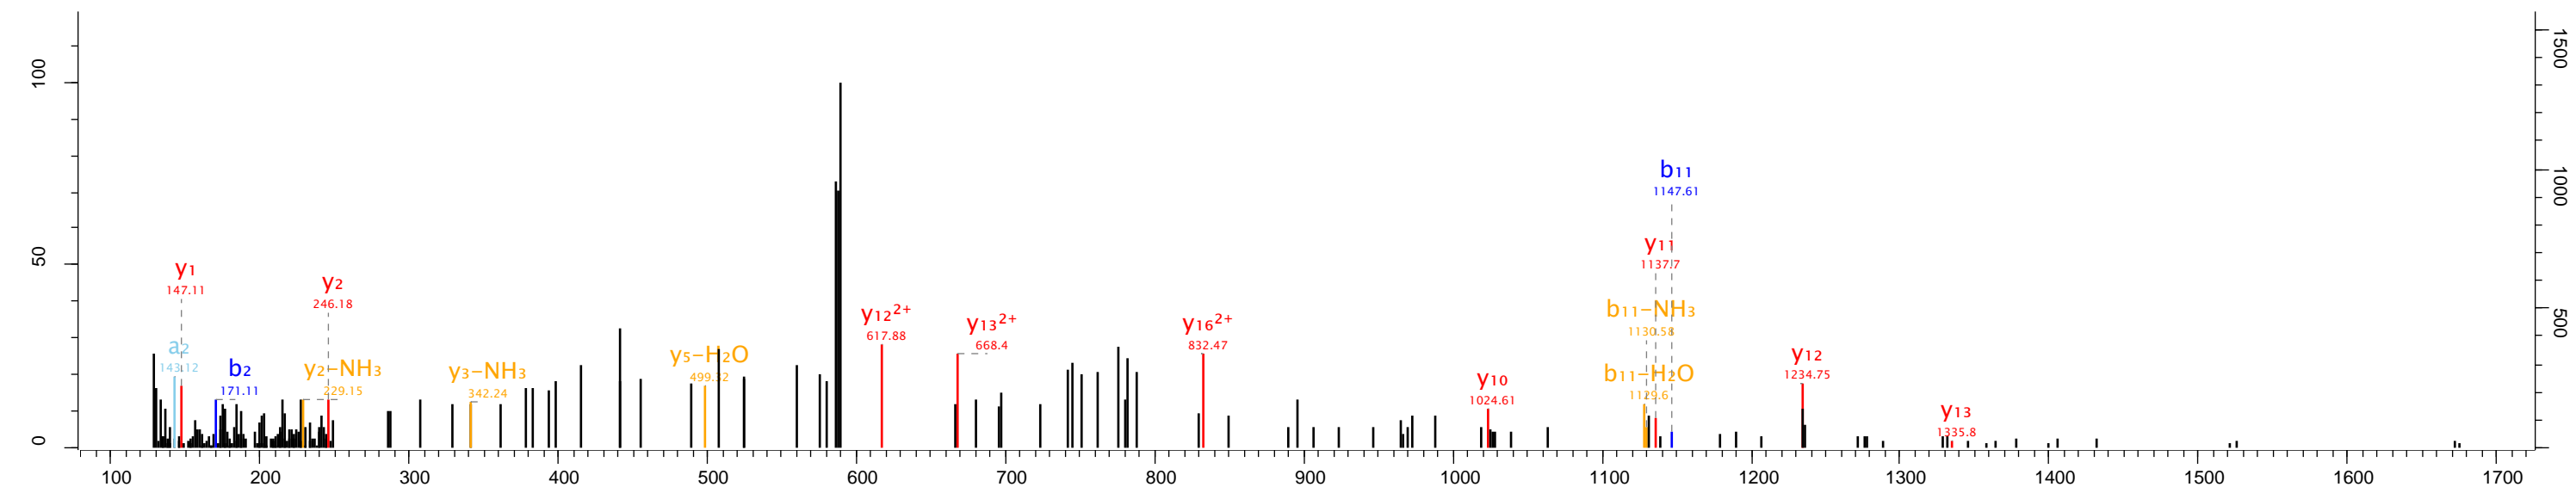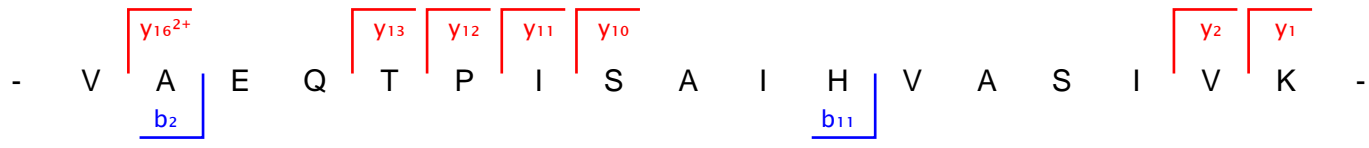

Spectral Annotation for Single-Peptide IDs between Single D11 Cells using Q-OT-LIT

Raw file 2015-01-08\_CL03\_Blastomere-15 Scan 32907 Method ITMS; HCD Score 106.42 m/z 451.27

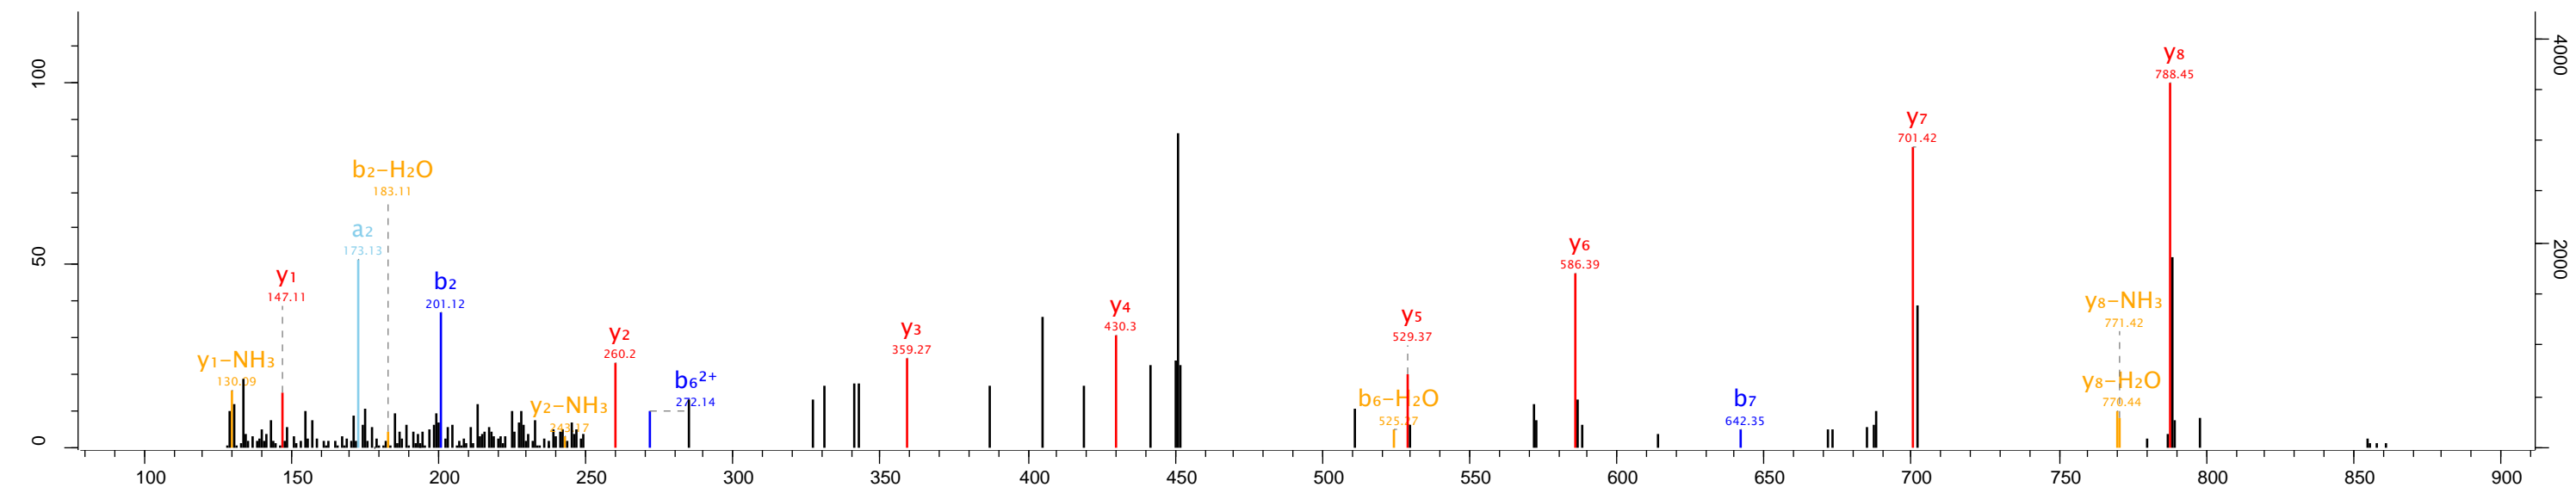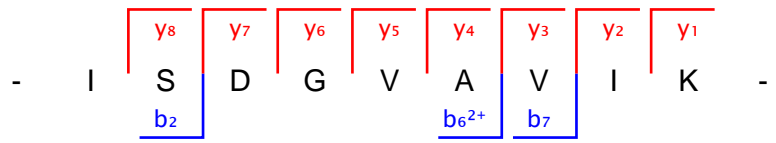

Spectral Annotation for Single-Peptide IDs between Single D11 Cells using Q-OT-LIT

Raw file 2015-01-08\_CL03\_Blastomere-15  
 Scan 32977 Method ITMS; HCD Score 42.04 m/z 690.67

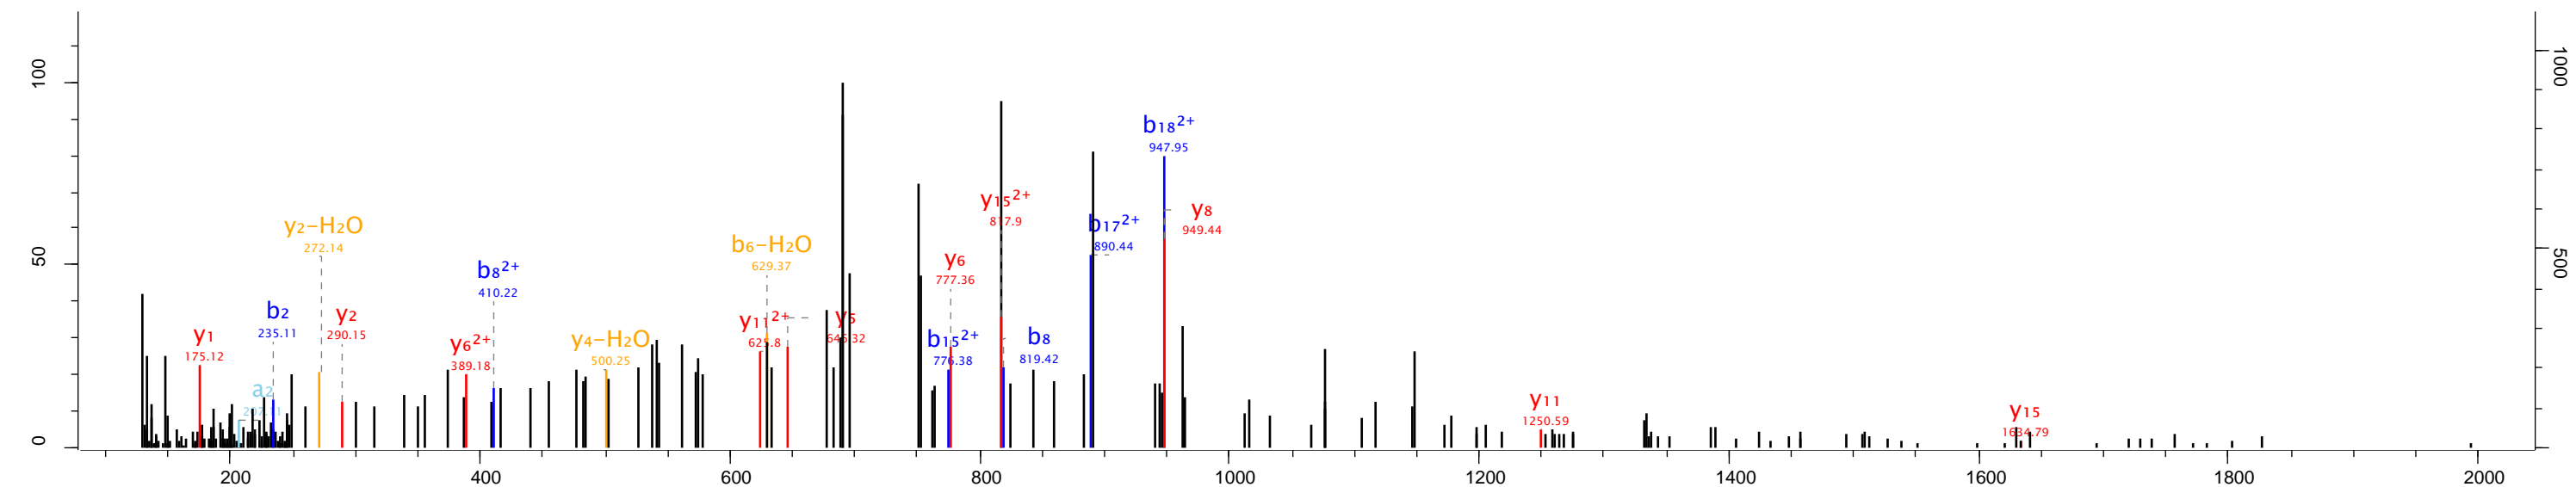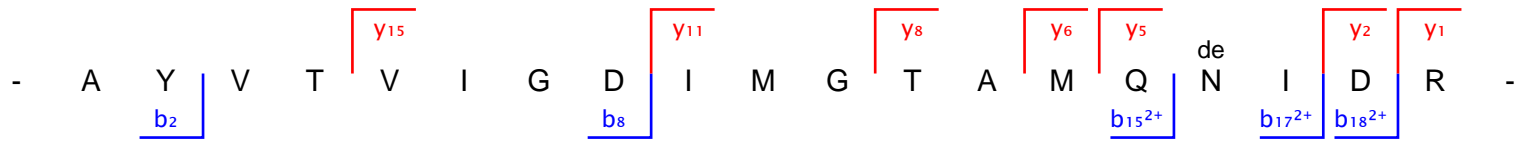

Spectral Annotation for Single-Peptide IDs between Single D11 Cells using Q-OT-LIT

Raw file: 2015-01-08\_CL03\_Blastomere-15  
 Scan: 33358 Method: ITMS; HCD Score: 38.95 m/z: 696.65

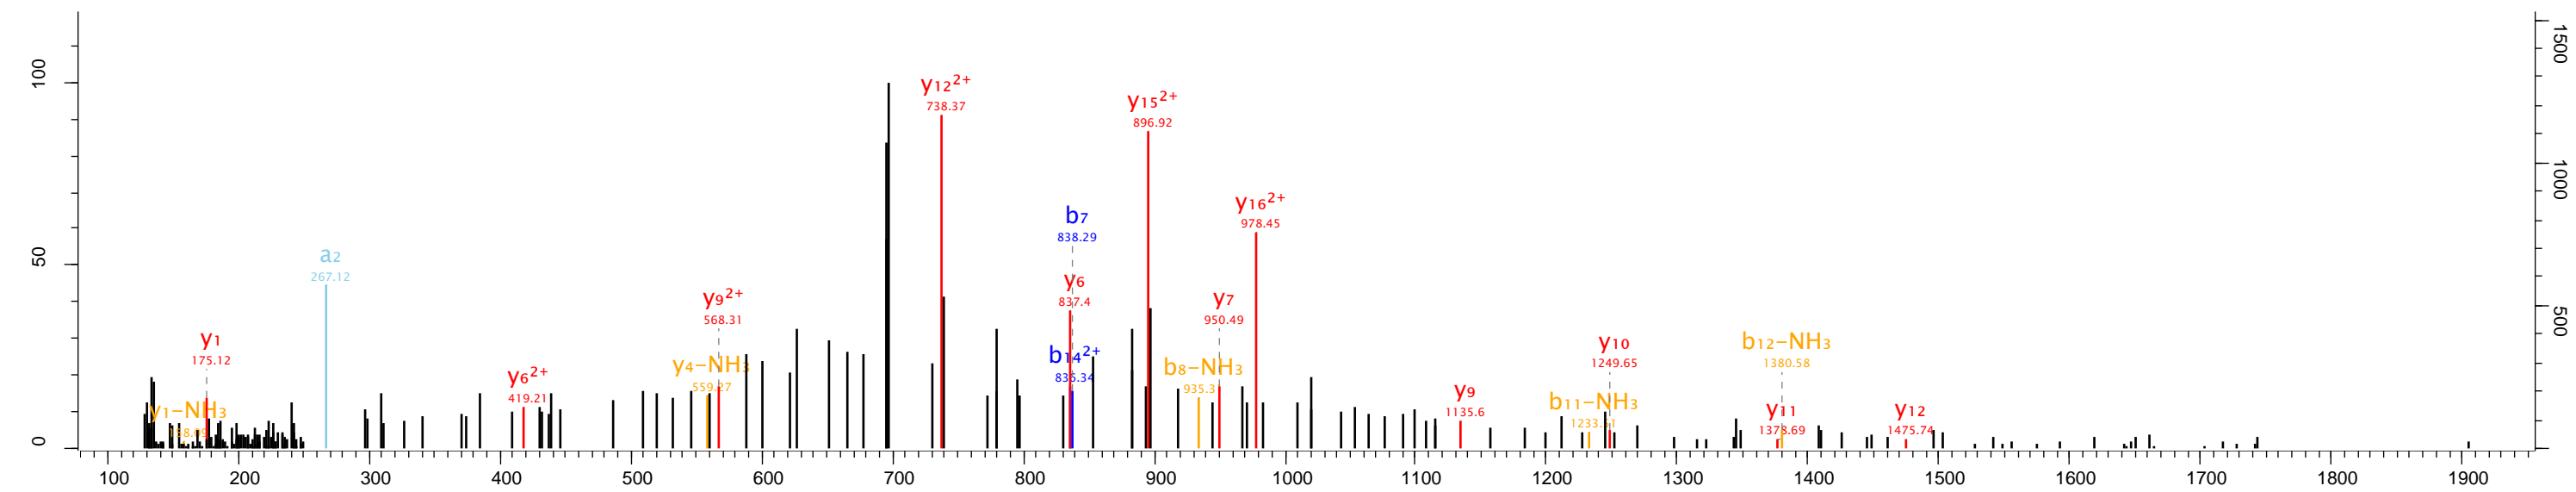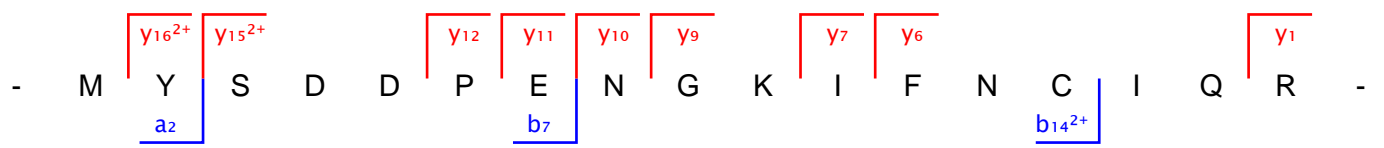

Spectral Annotation for Single-Peptide IDs between Single D11 Cells using Q-OT-LIT

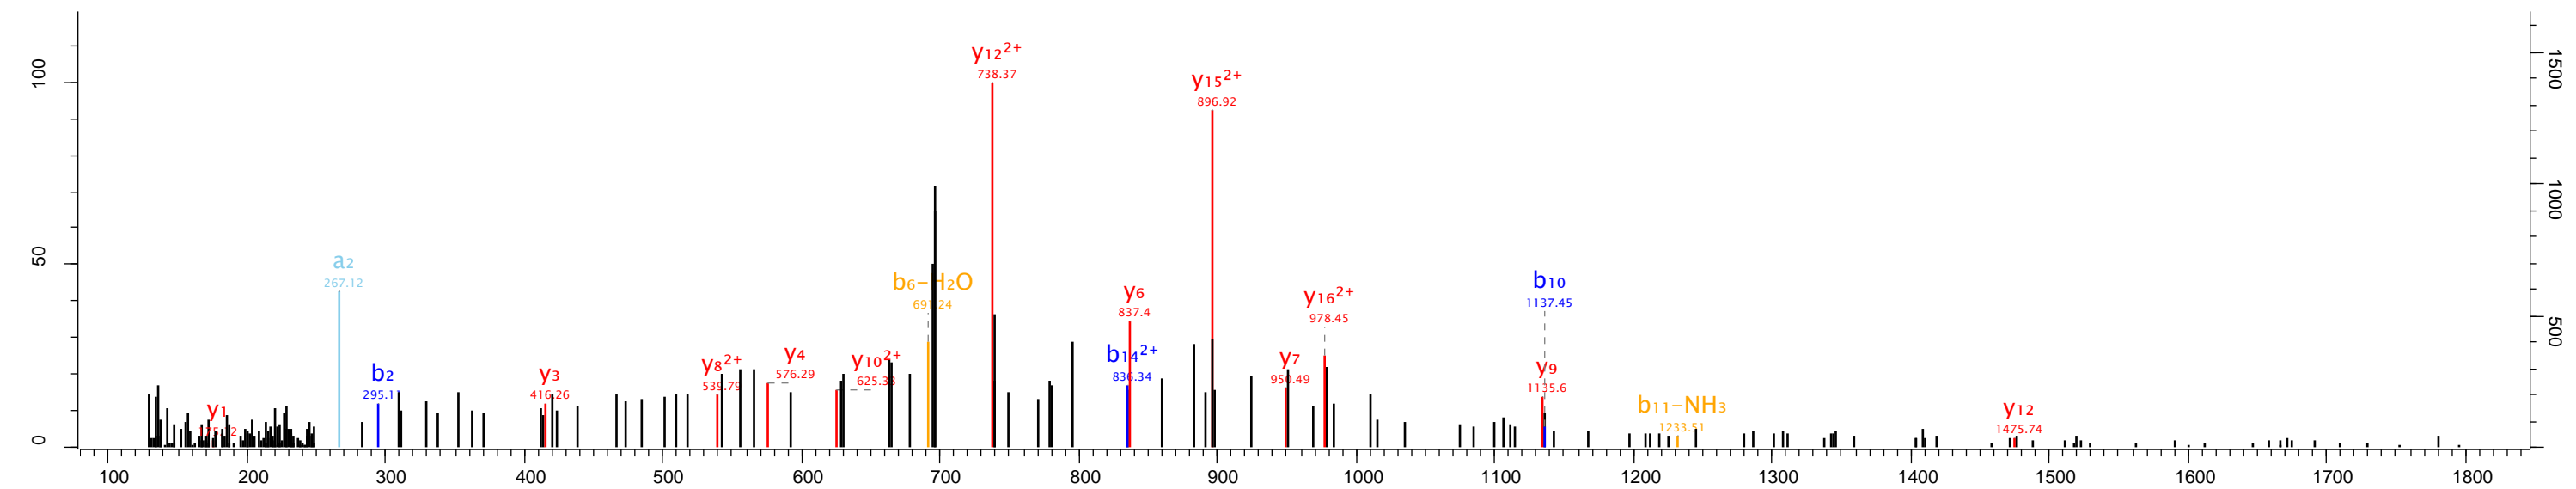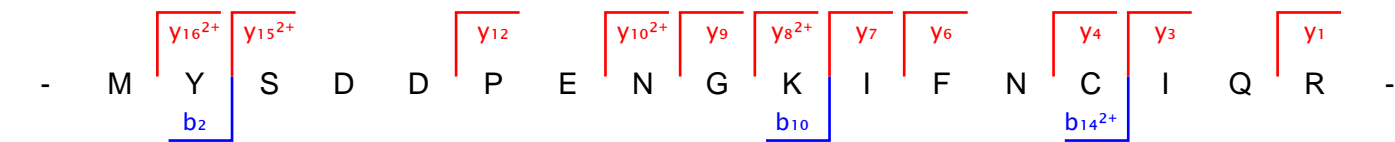

Raw file 2015-01-08\_CL03\_Blastomere-15 Scan 33404 Method ITMS; HCD Score 46.32 m/z 630.32

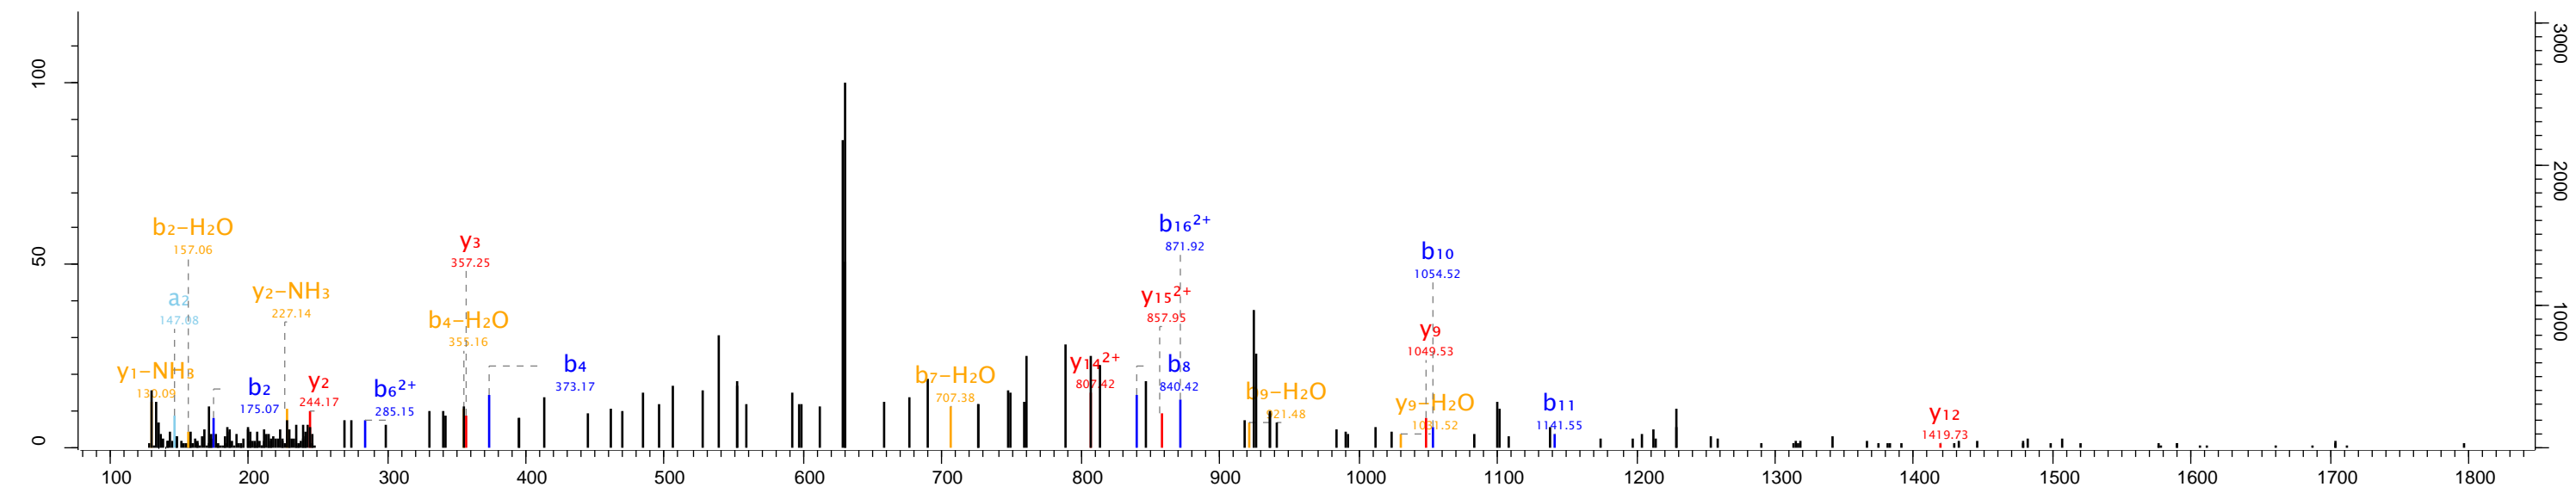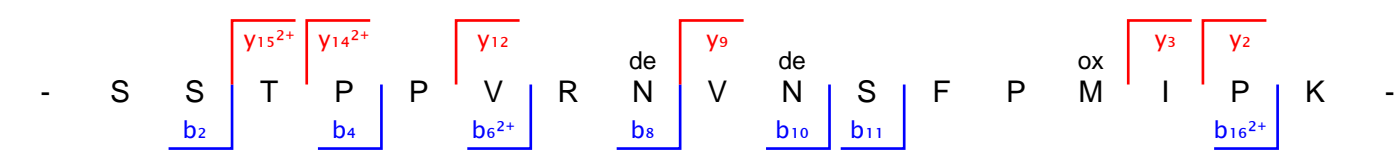

Spectral Annotation for Single-Peptide IDs between Single D11 Cells using Q-OT-LIT

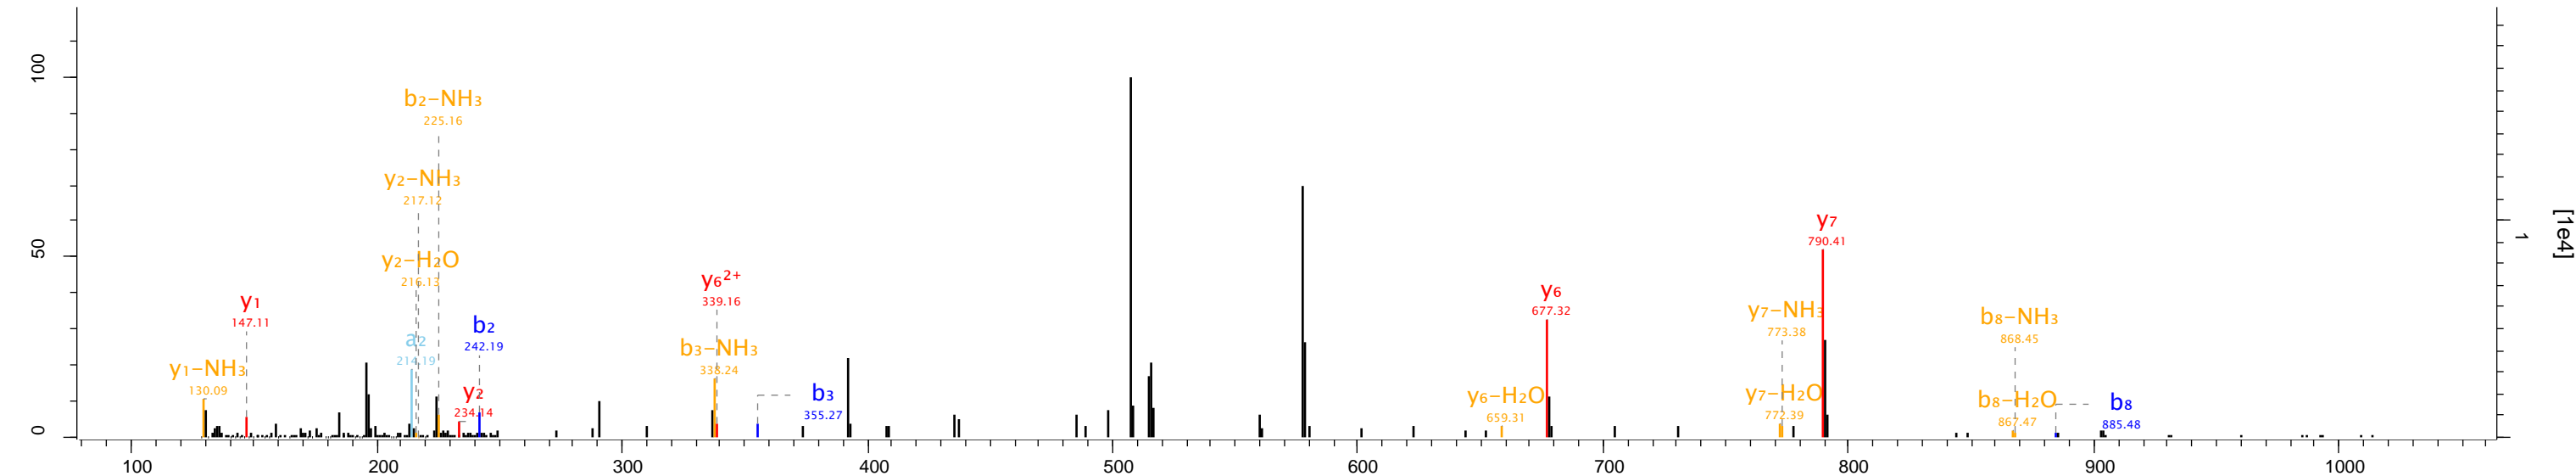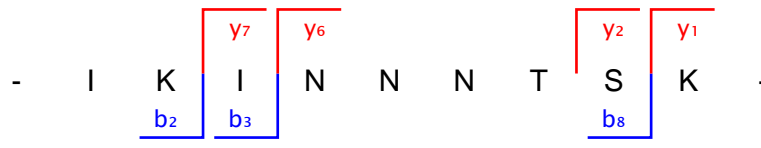

Raw file 2015-01-08\_CL03\_Blastomere-15 Scan 33708 Method ITMS; HCD Score 46.51 m/z 678.68

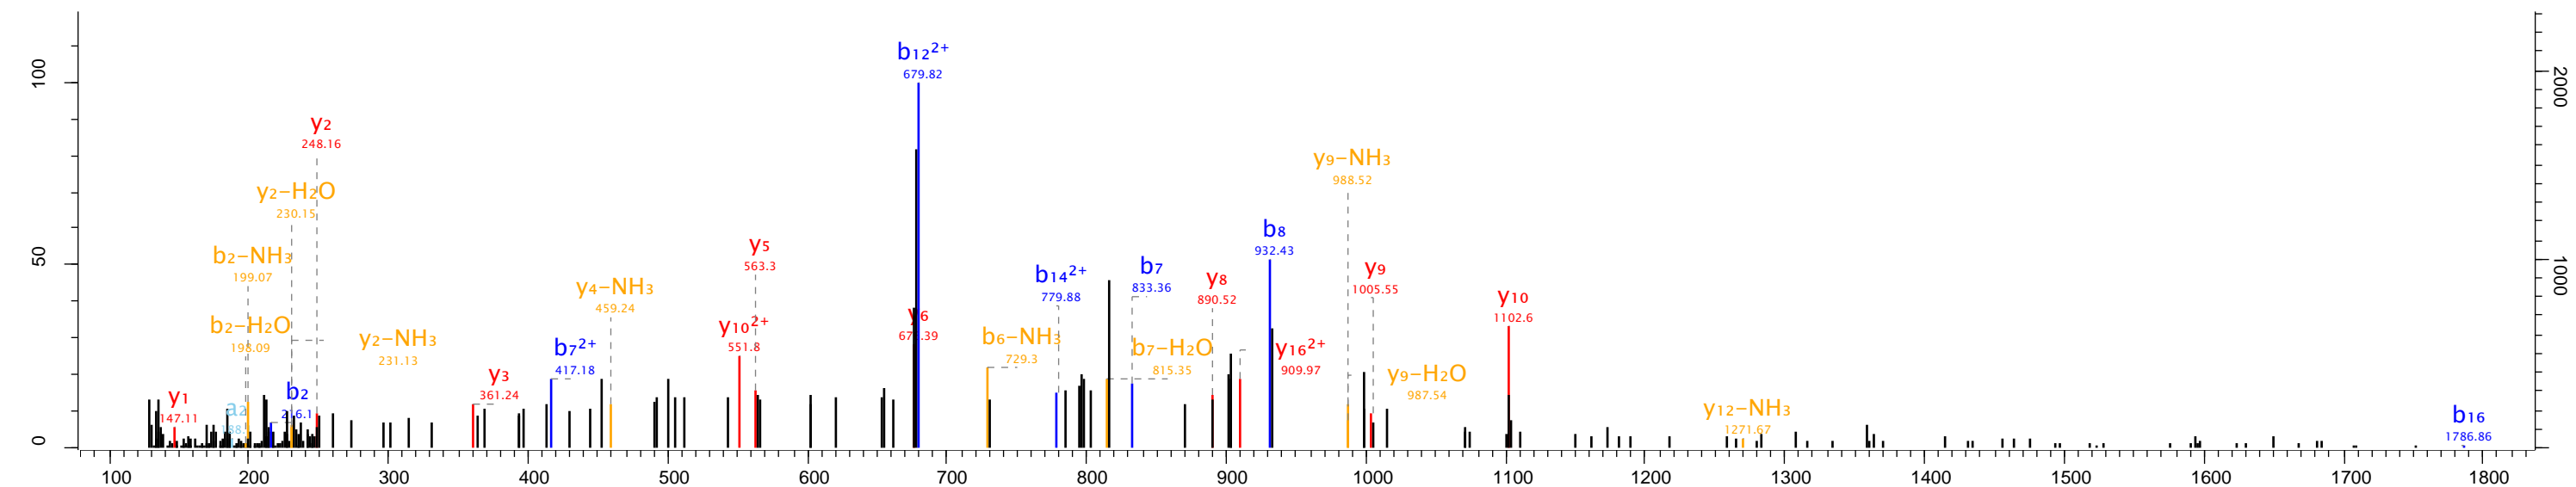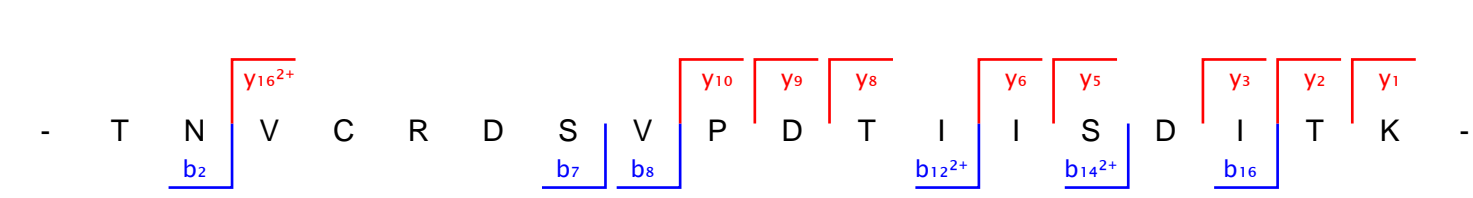

Spectral Annotation for Single-Peptide IDs between Single D11 Cells using Q-OT-LIT



Raw file 2015-01-08\_CL03\_Blastomere-15 Scan 33721 Method ITMS; HCD Score 78.11 m/z 516.3

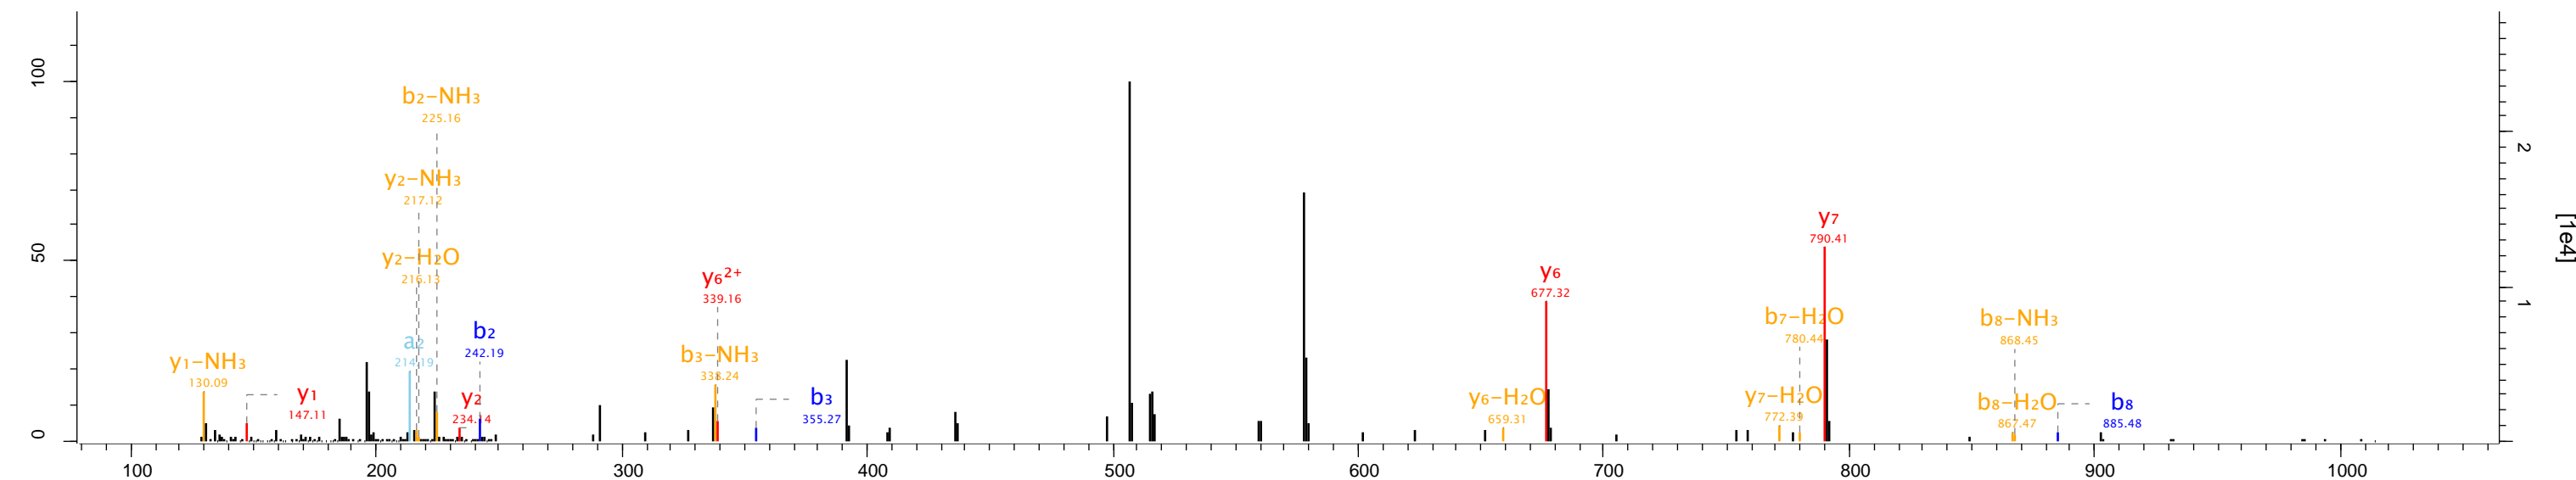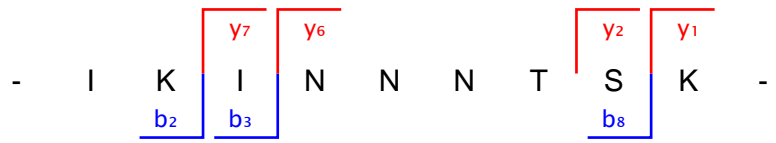

Spectral Annotation for Single-Peptide IDs between Single D11 Cells using Q-OT-LIT

Raw file 2015-01-08\_CL03\_Blastomere-15 Scan 33731 Method ITMS; HCD Score 48.37 m/z 643.67

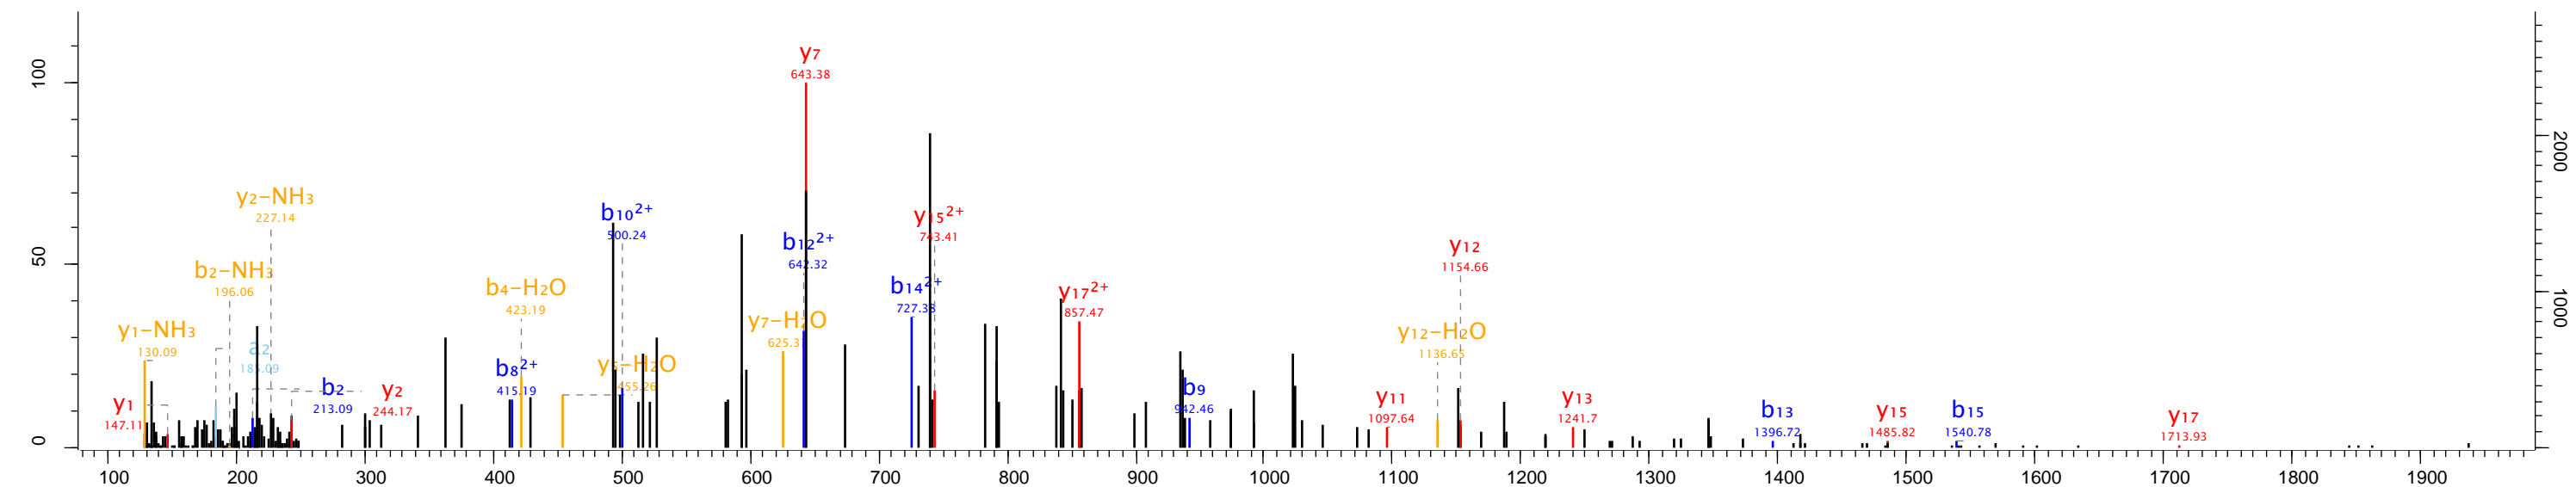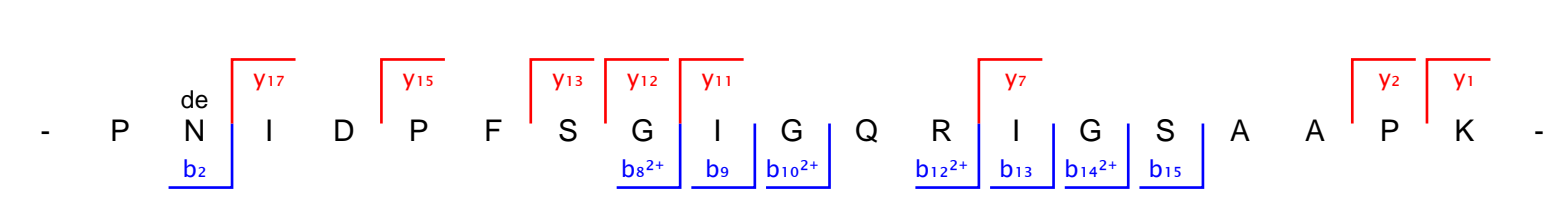

Spectral Annotation for Single-Peptide IDs between Single D11 Cells using Q-OT-LIT

Raw file 2015-01-08\_CL03\_Blastomere-15 Scan 33735 Method ITMS; HCD Score 65.47 m/z 516.29

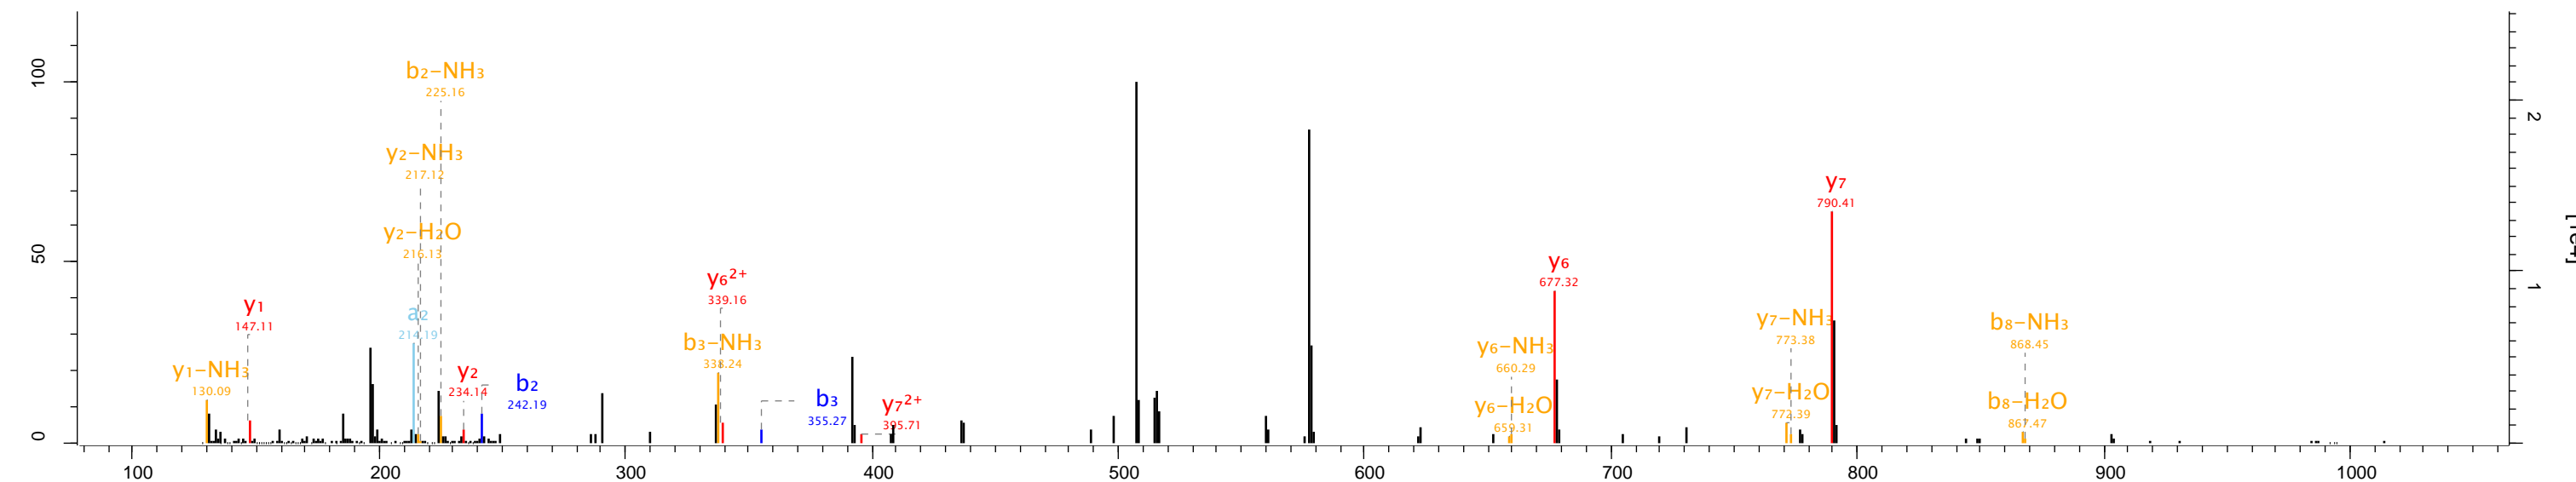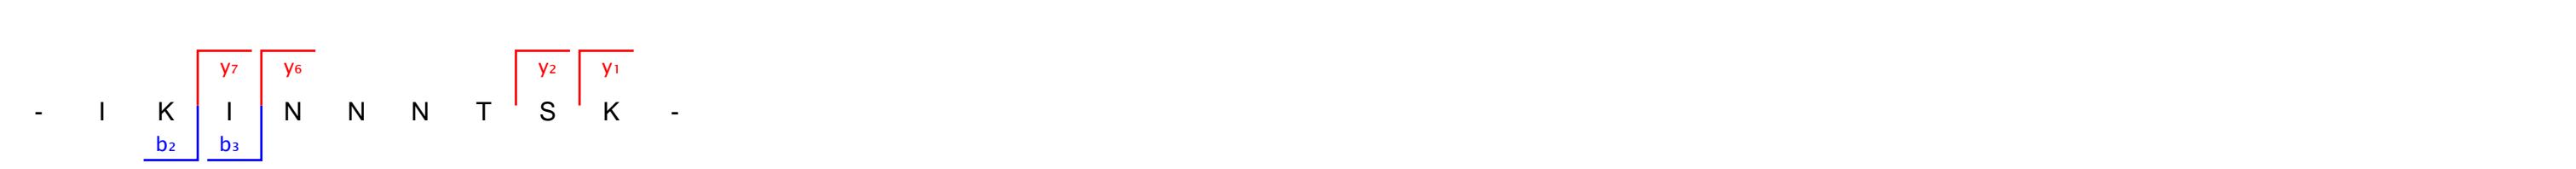

Raw file 2015-01-08\_CL03\_Blastomere-15 Scan 33762 Method ITMS; HCD Score 40.98 m/z 685.99

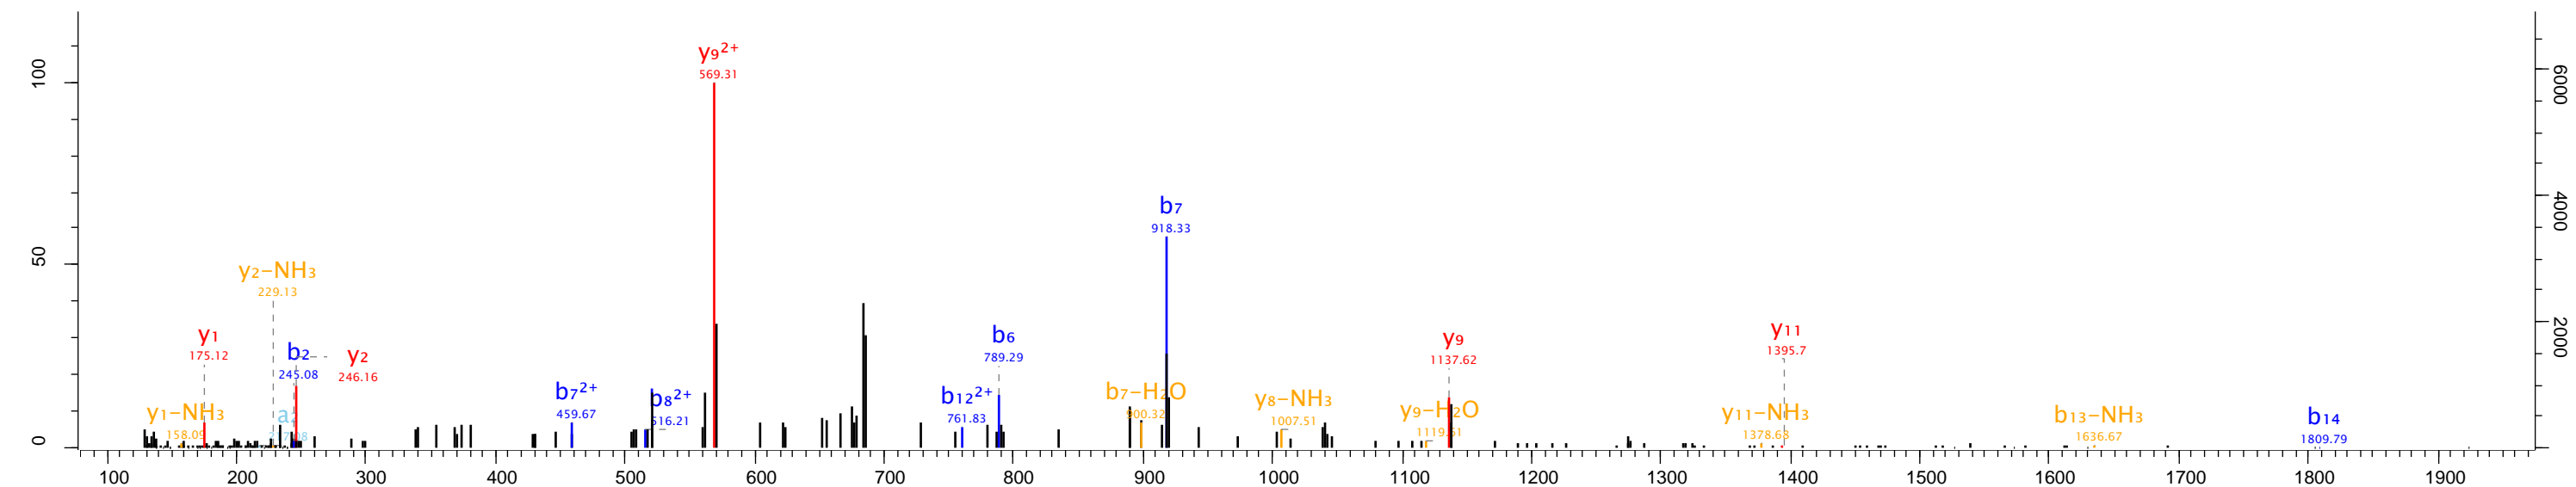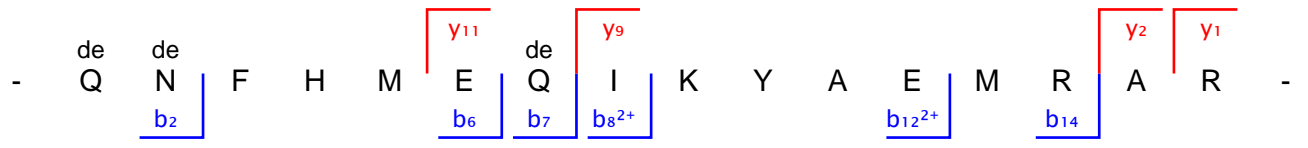

Spectral Annotation for Single-Peptide IDs between Single D11 Cells using Q-OT-LIT

2015-01-08\_CL03\_Blastomere-15

33911 ITMS; HCD 58.71 643.33

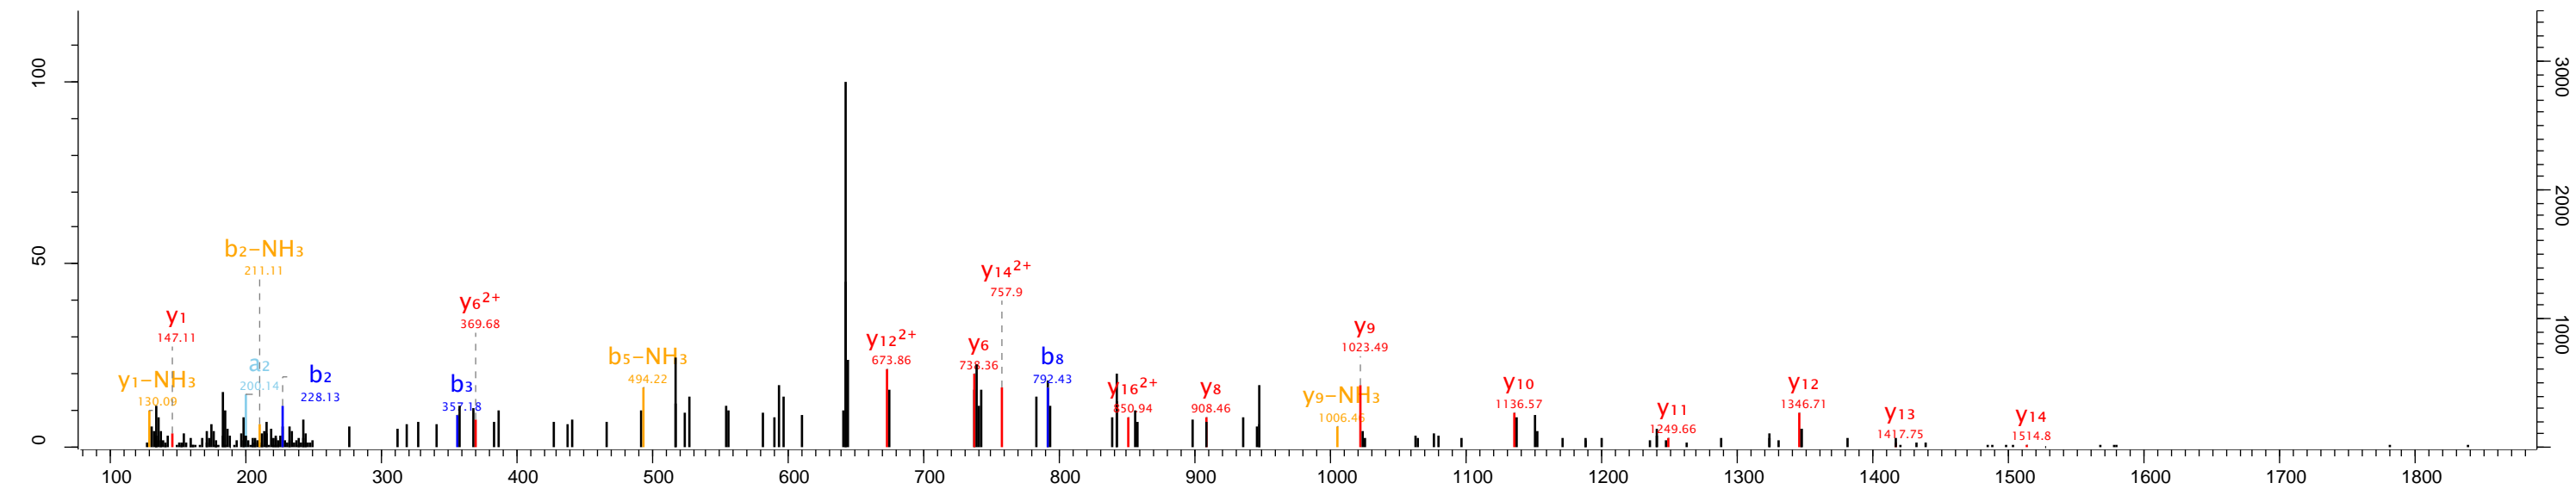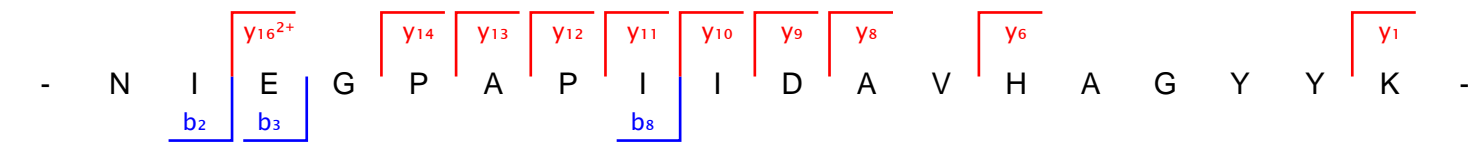

Raw file 2015-01-08\_CL03\_Blastomere-15 Scan 34042 Method ITMS; HCD Score 67.68 m/z 643.67

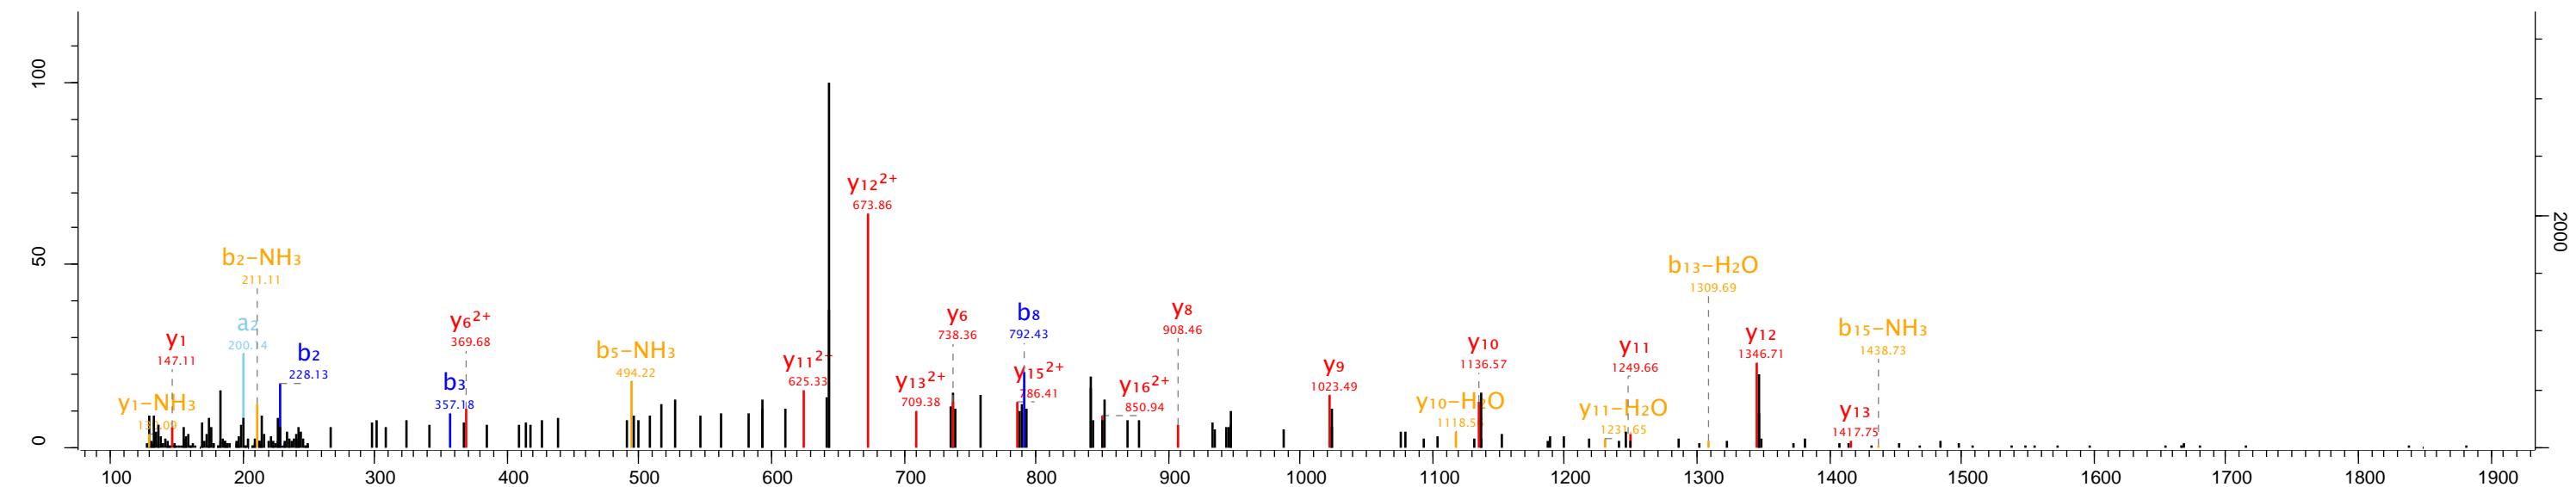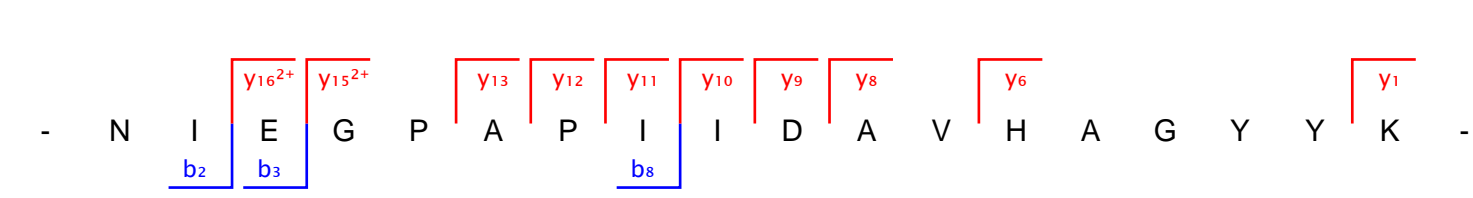

Spectral Annotation for Single-Peptide IDs between Single D11 Cells using Q-OT-LIT

Raw file  
 2015-01-08\_CL03\_Blastomere-15  
 Scan 34097 Method ITMS; HCD Score 41.26 m/z 706.7

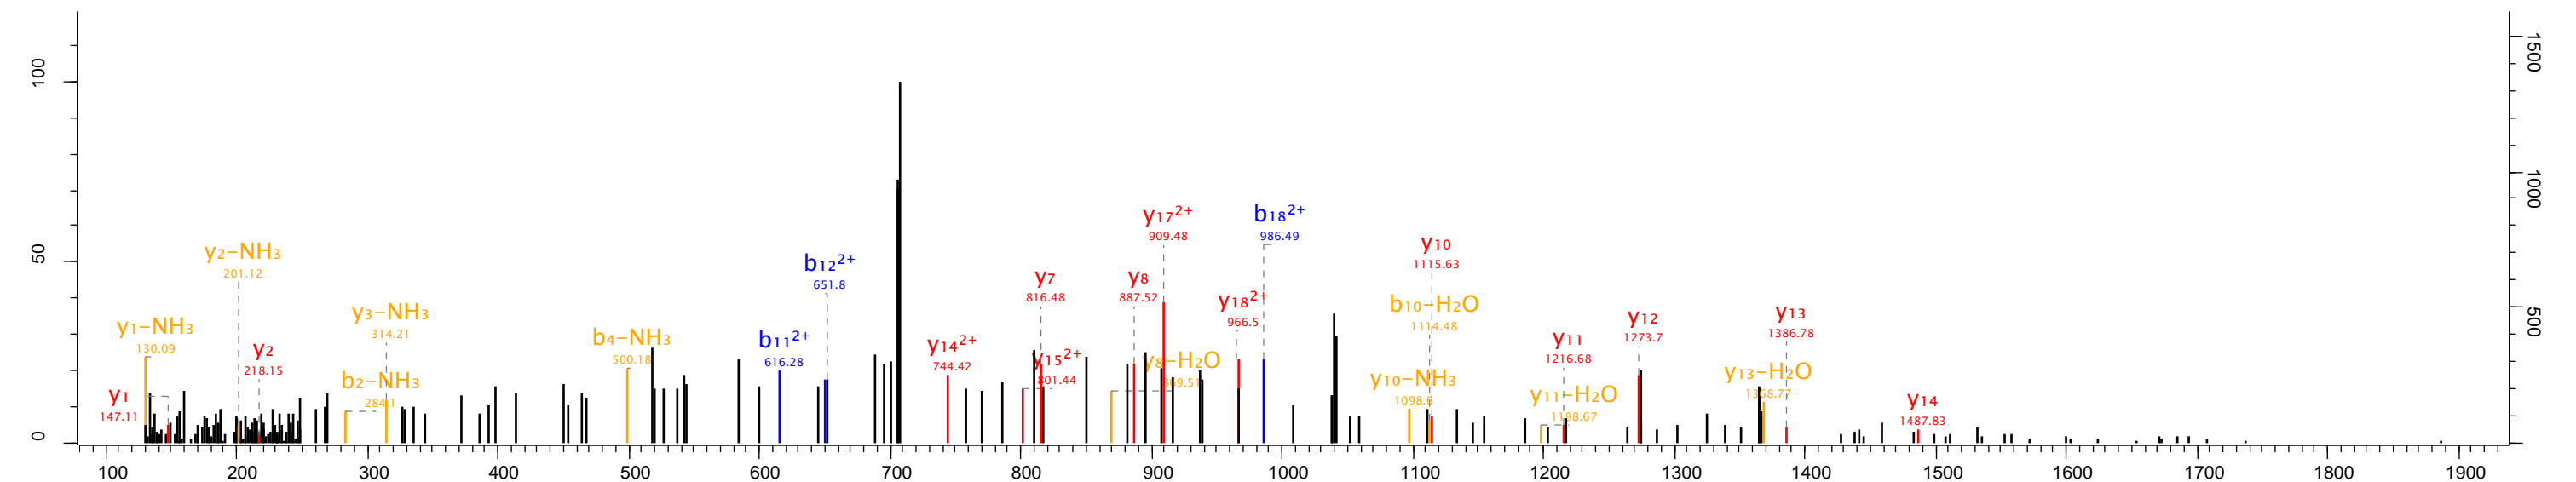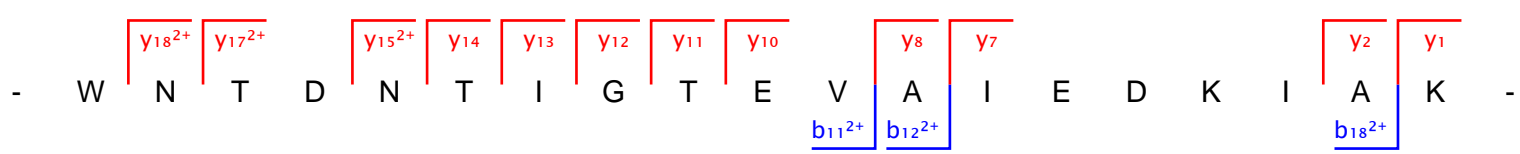

Spectral Annotation for Single-Peptide IDs between Single D11 Cells using Q-OT-LIT

Raw file 2015-01-08\_CL03\_Blastomere-15 Scan 34259 Method ITMS; HCD Score 81.51 m/z 677.36

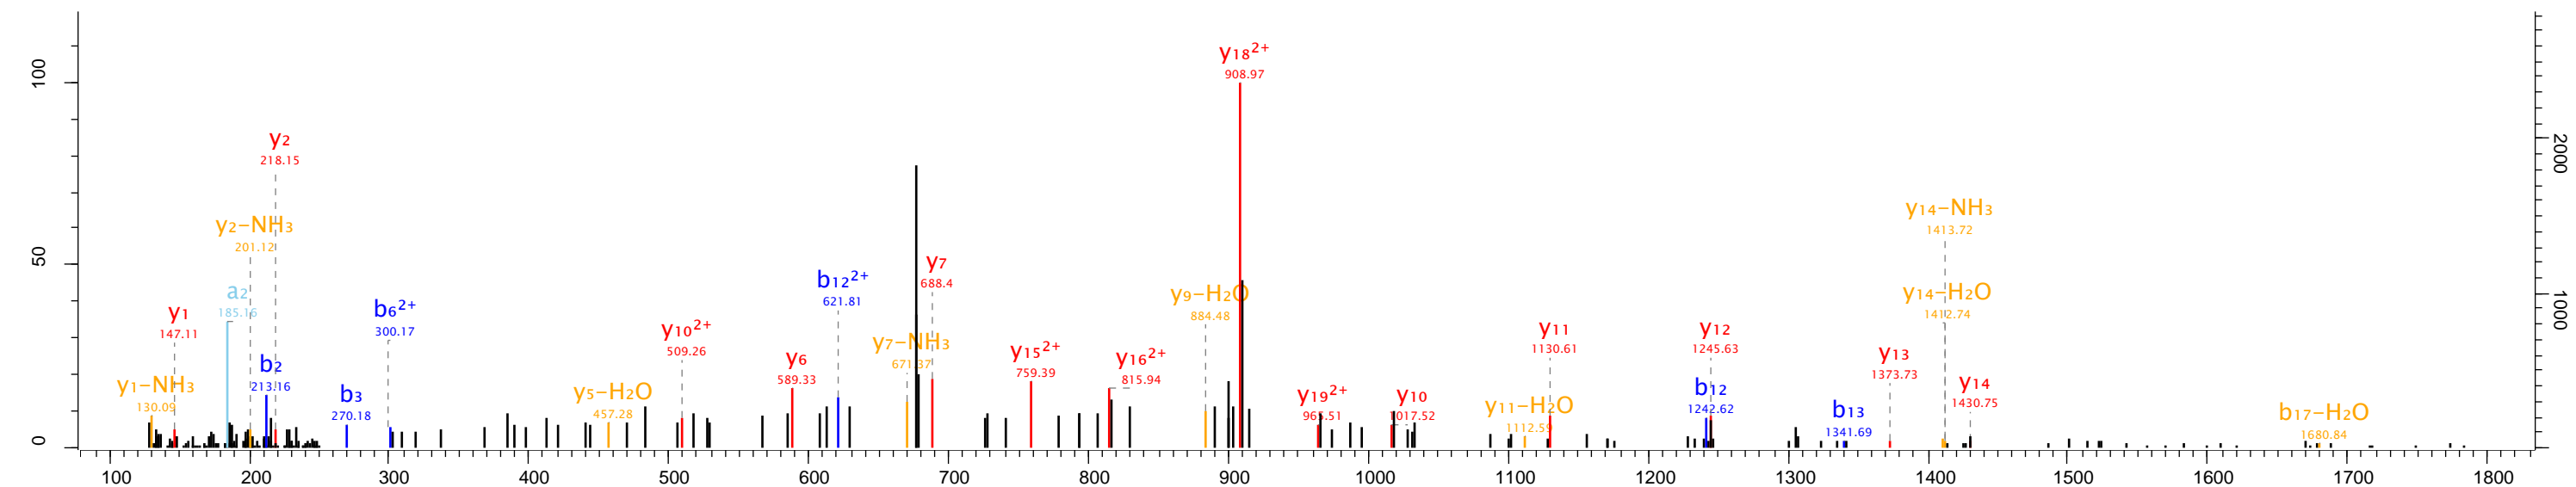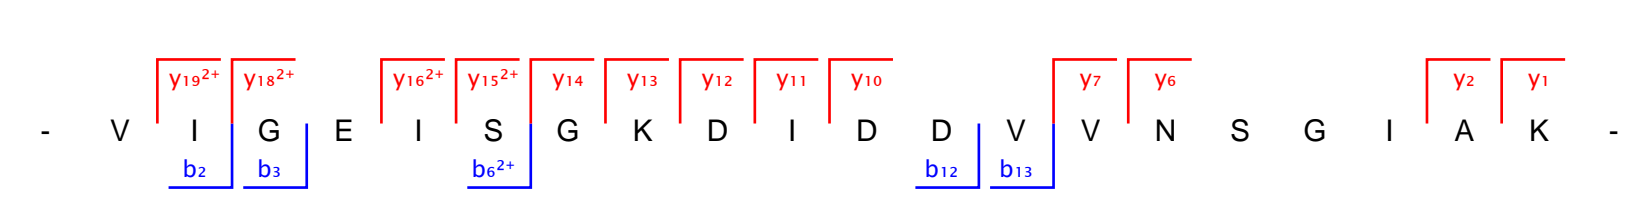

Spectral Annotation for Single-Peptide IDs between Single D11 Cells using Q-OT-LIT



Raw file 2015-01-08\_CL03\_Blastomere-15 Scan 34279 Method ITMS; HCD Score 78.55 m/z 677.36

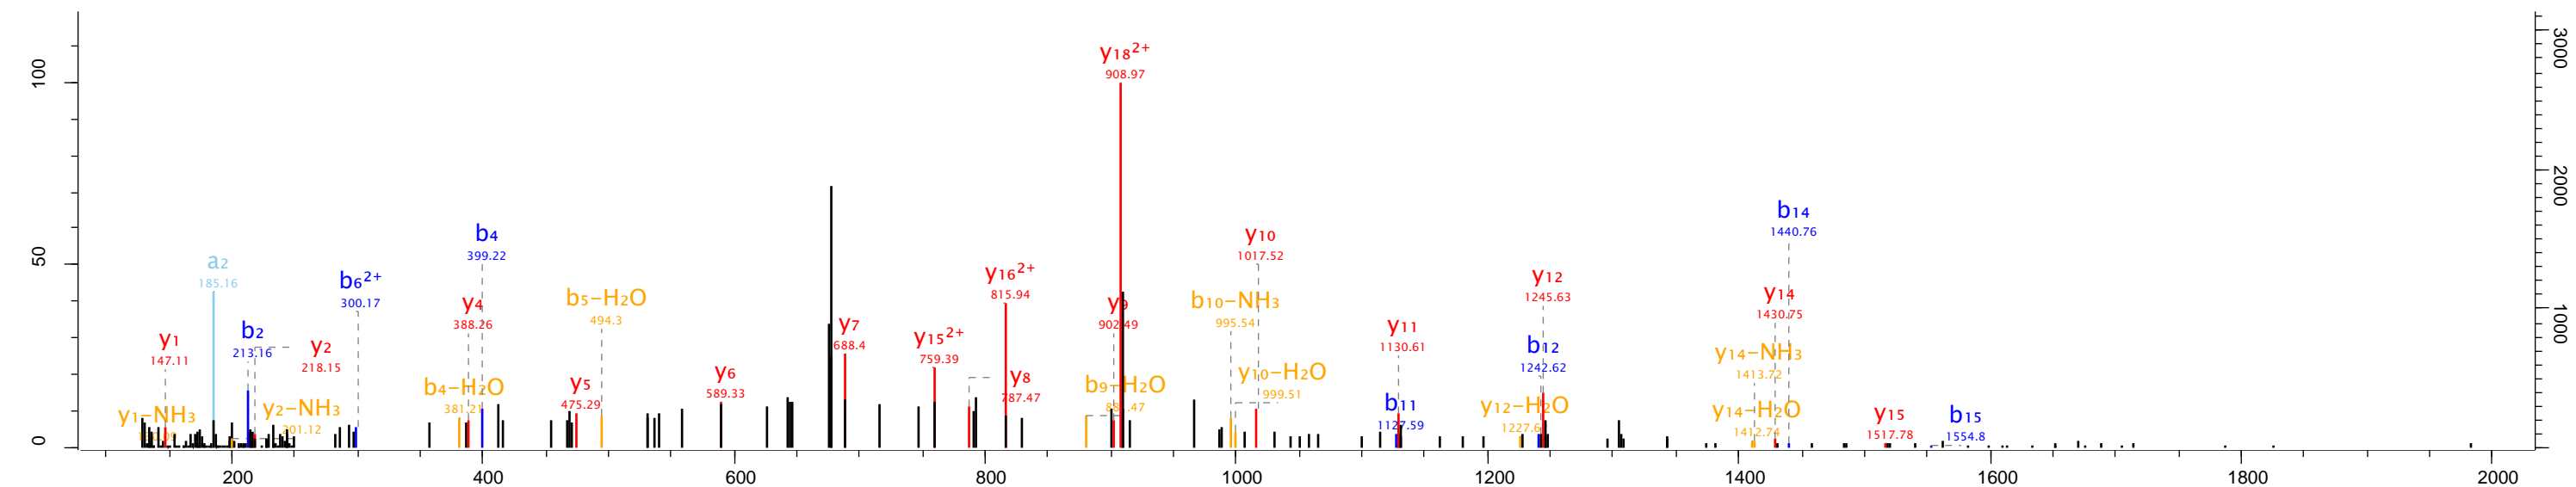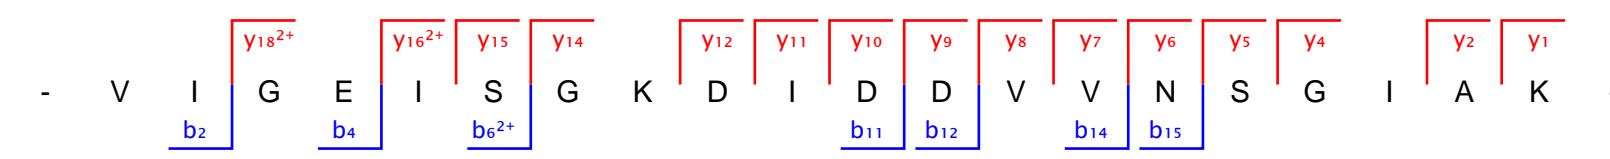

Spectral Annotation for Single-Peptide IDs between Single D11 Cells using Q-OT-LIT

Raw file: 2015-01-08\_CL03\_Blastomere-15  
 Scan: 34322 Method: ITMS; HCD Score: 65.8 m/z: 756.65

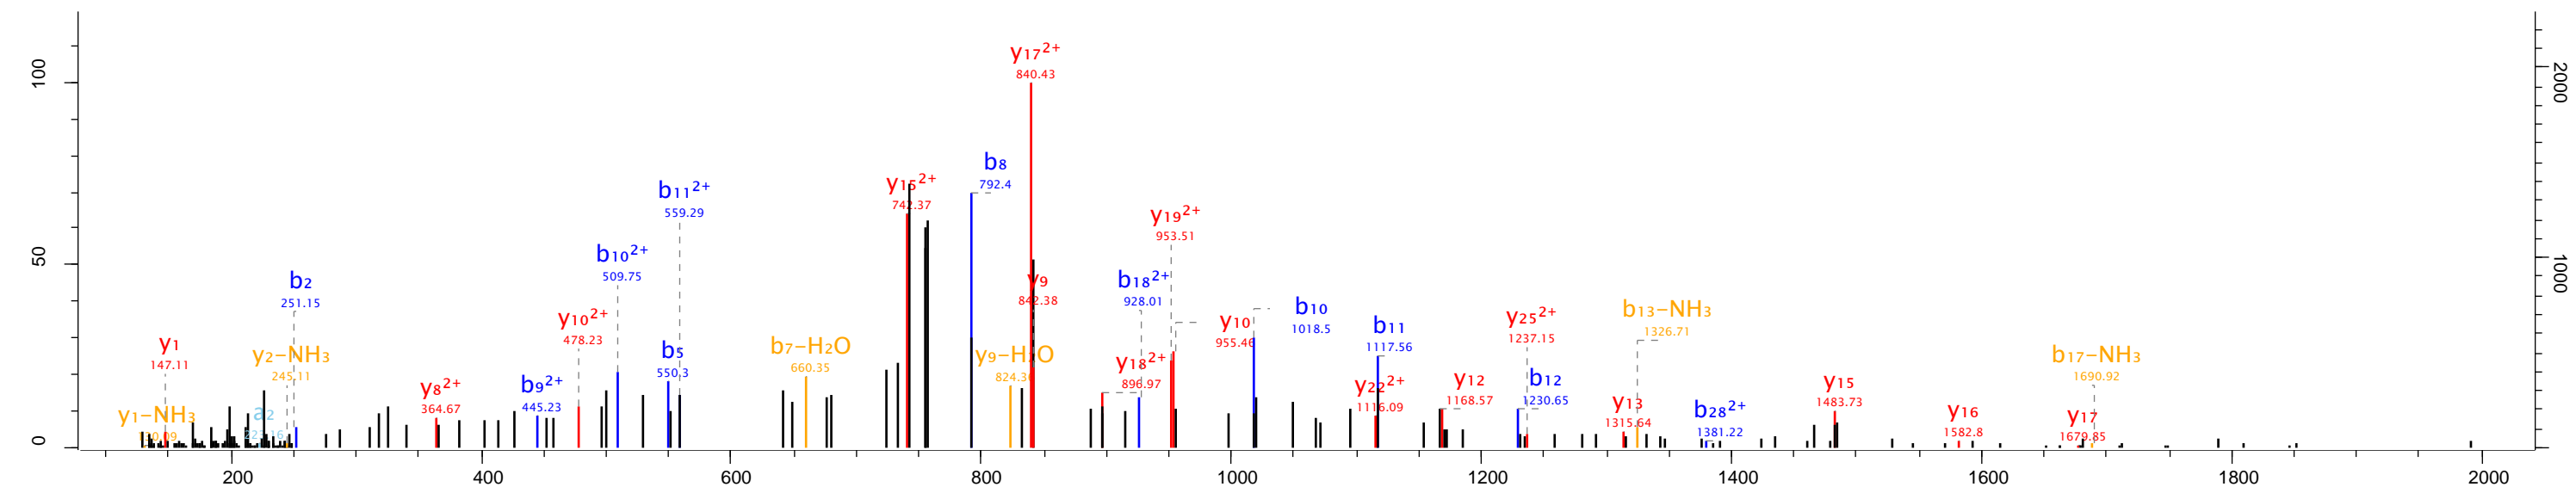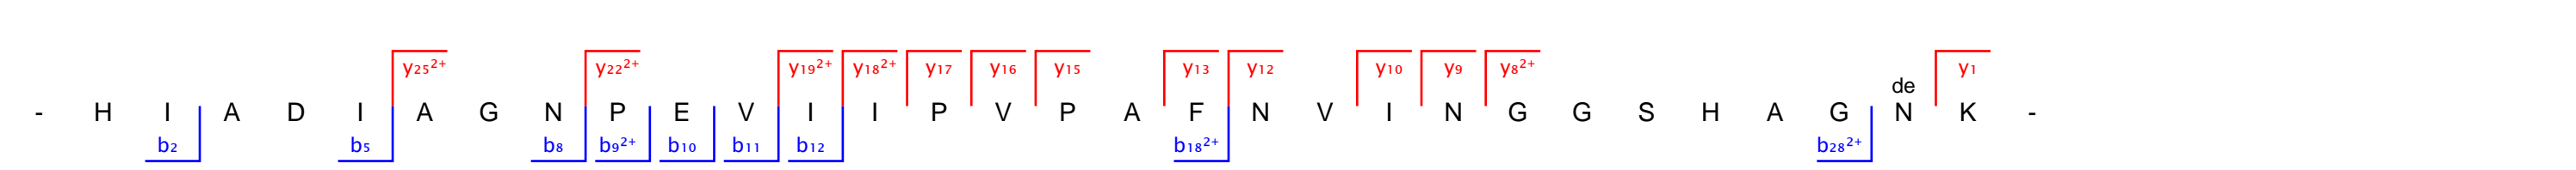

Spectral Annotation for Single-Peptide IDs between Single D11 Cells using Q-OT-LIT

Raw file 2015-01-08\_CL03\_Blastomere-15 Scan 34440 Method ITMS; HCD Score 84.69 m/z 513.31

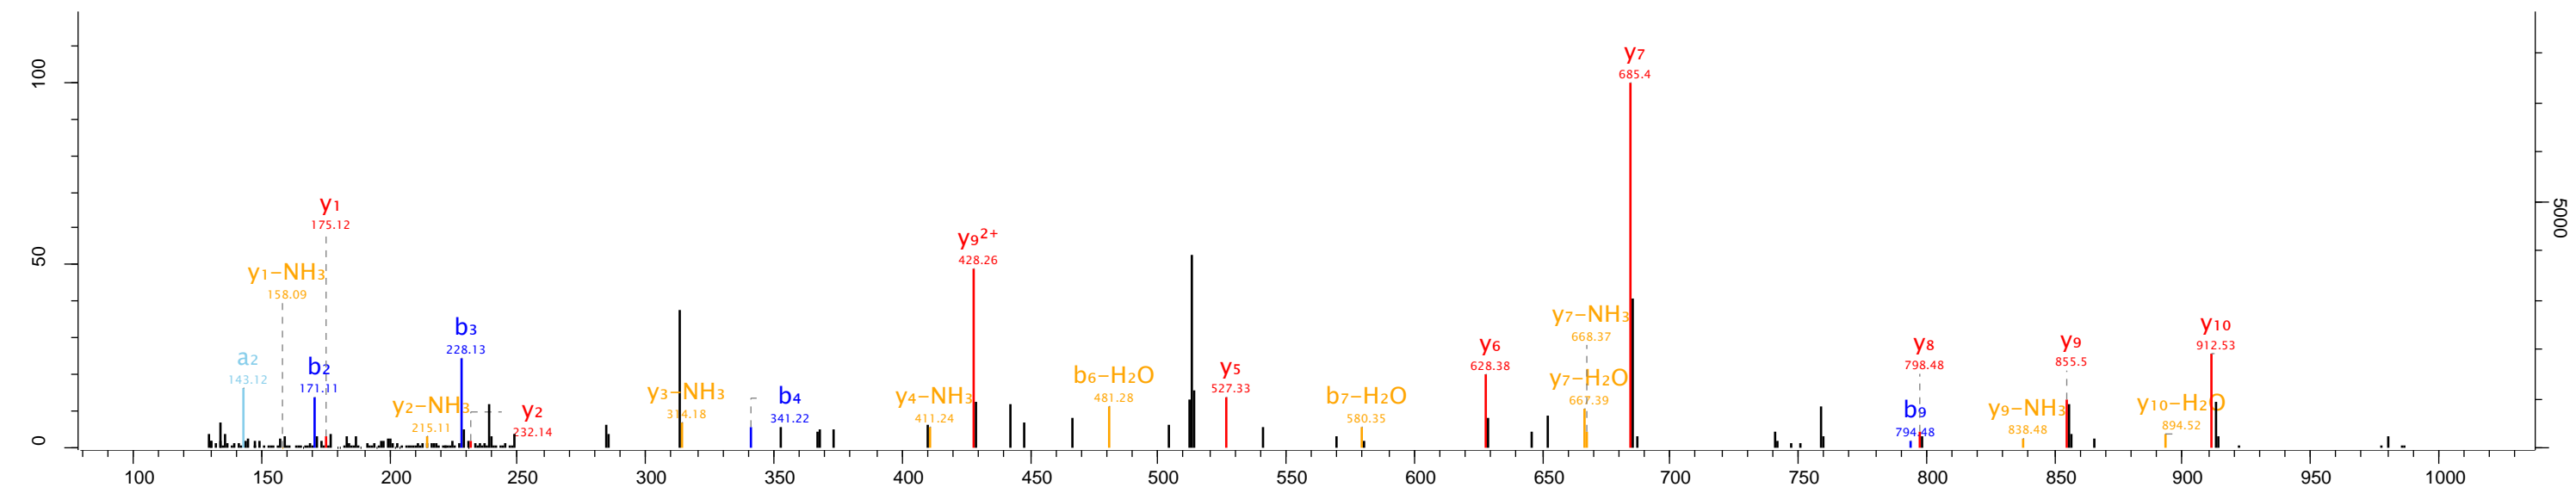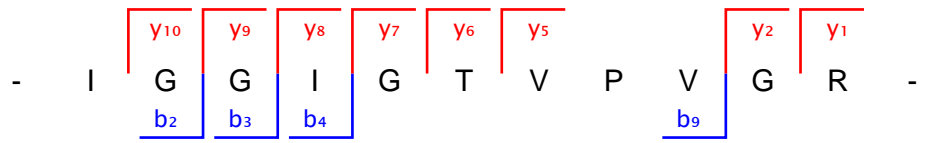

Spectral Annotation for Single-Peptide IDs between Single D11 Cells using Q-OT-LIT

Raw file Scan Method Score m/z  
 2015-01-08\_CL03\_Blastomere-15 34444 ITMS; HCD 102.07 518.77

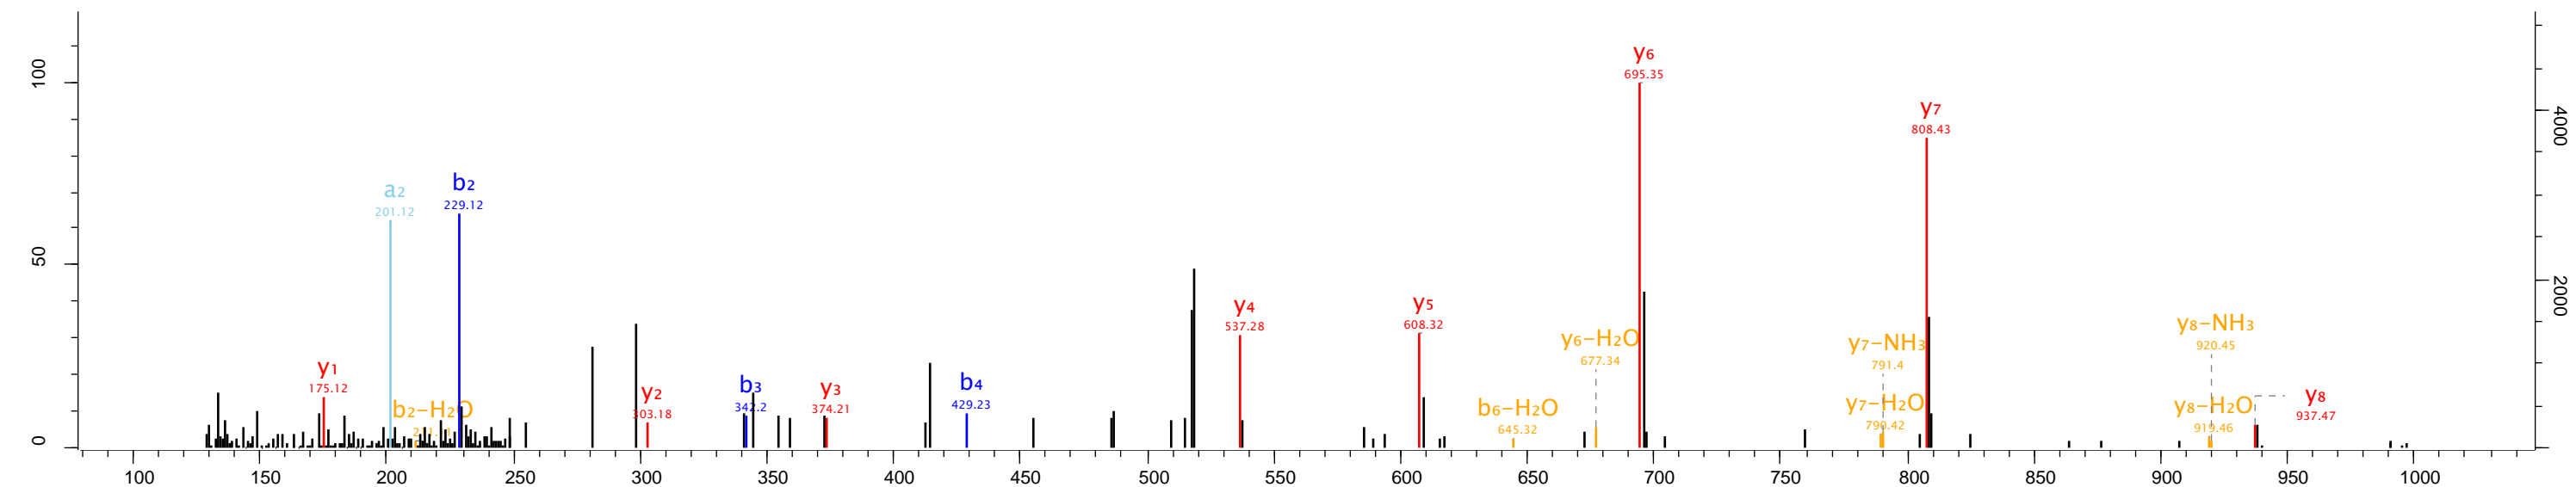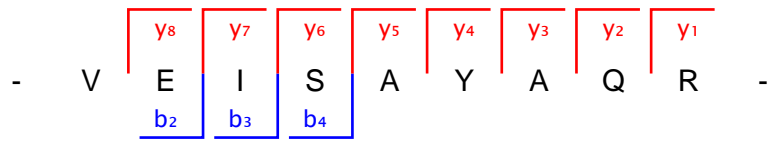



Raw file 2015-01-08\_CL03\_Blastomere-15 Scan 34732 Method ITMS; HCD Score 102.39 m/z 677.37

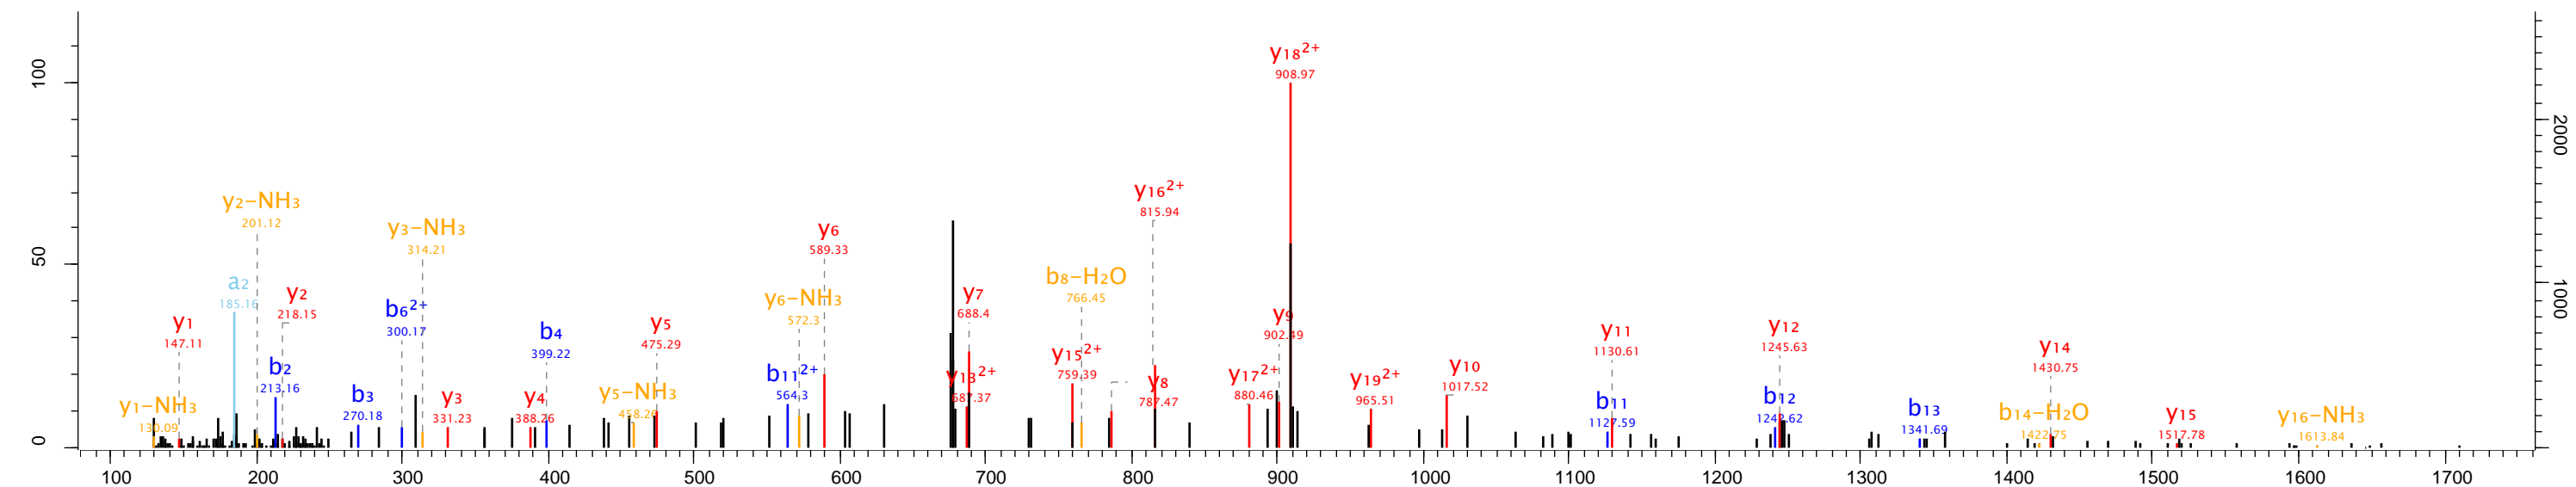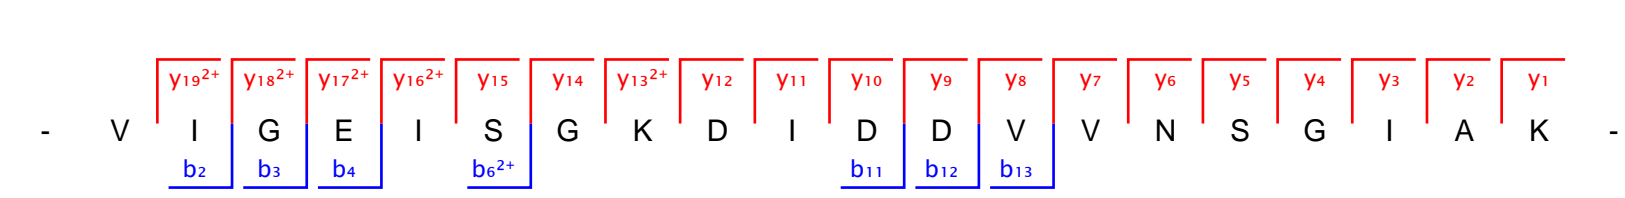

Spectral Annotation for Single-Peptide IDs between Single D11 Cells using Q-OT-LIT

Raw file 2015-01-08\_CL03\_Blastomere-15 Scan 34773 Method ITMS; HCD Score 105.5 m/z 677.03

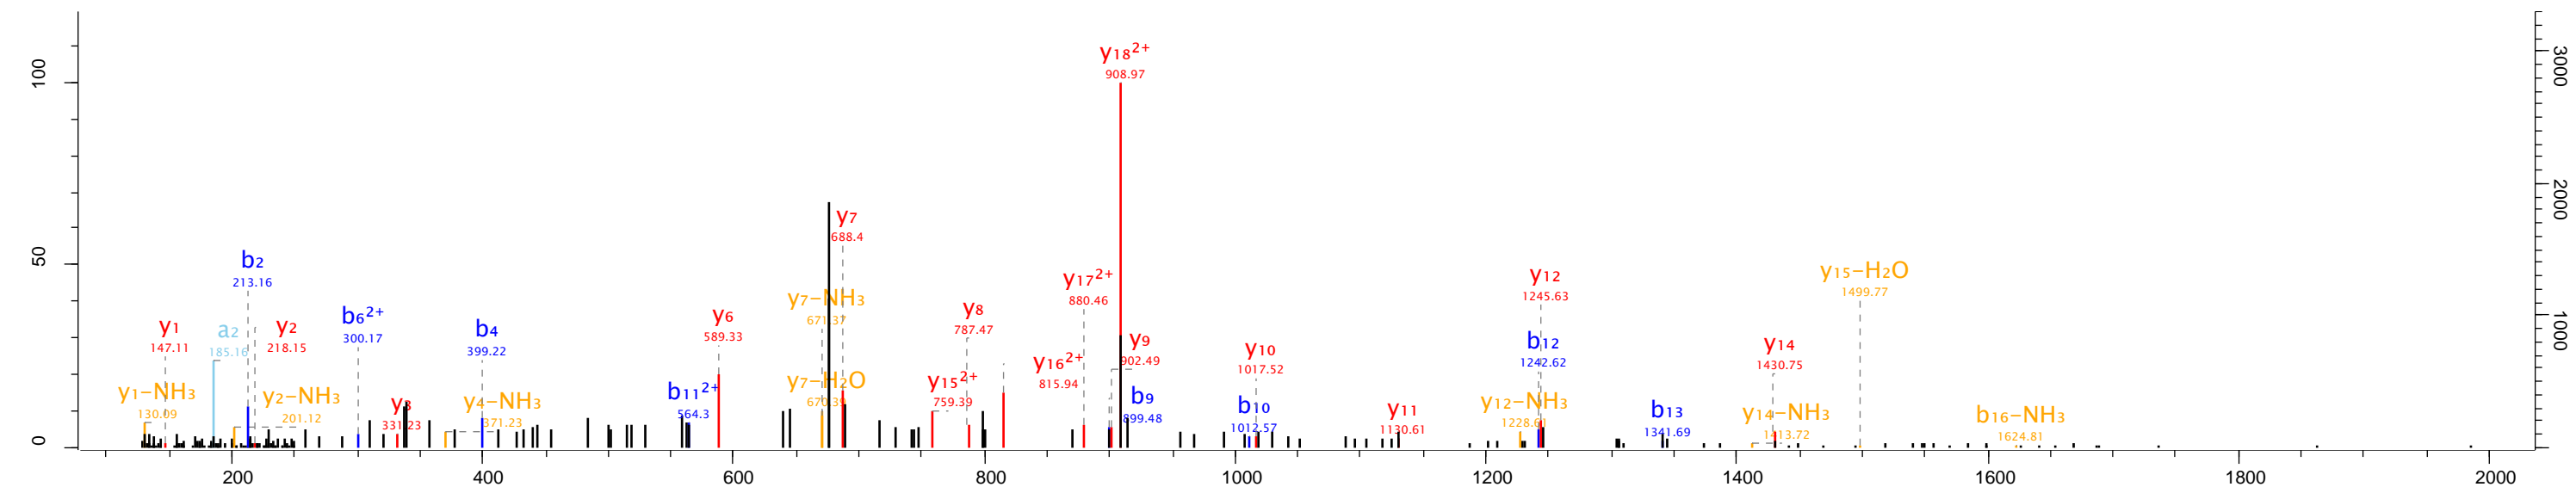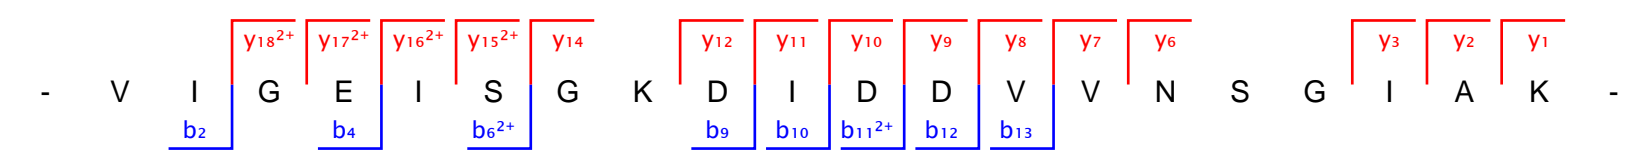

Spectral Annotation for Single-Peptide IDs between Single D11 Cells using Q-OT-LIT

Raw file 2015-01-08\_CL03\_Blastomere-15 Scan 34774 Method ITMS; HCD Score 41.43 m/z 539.28

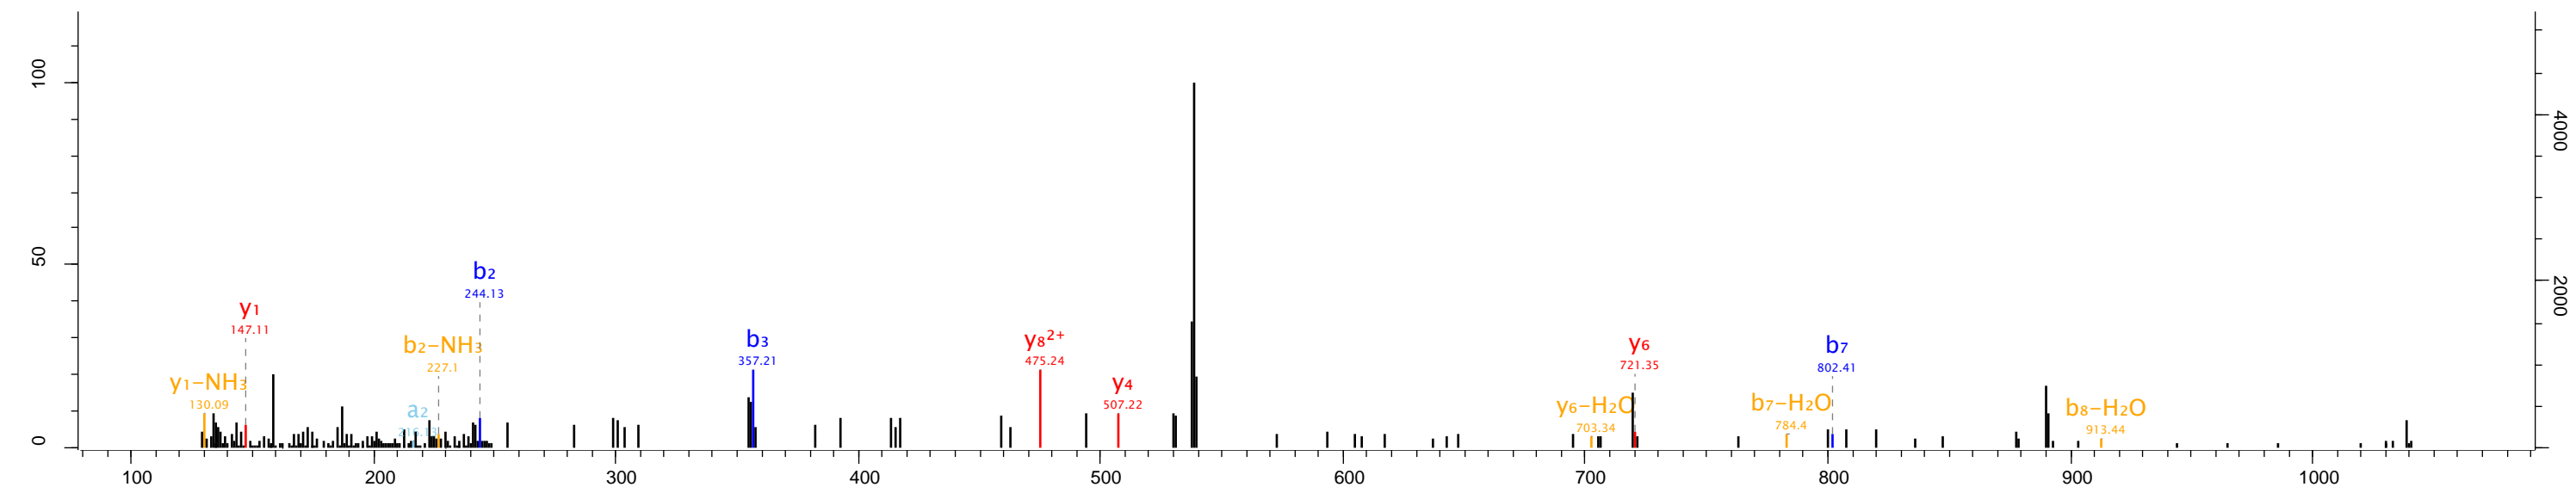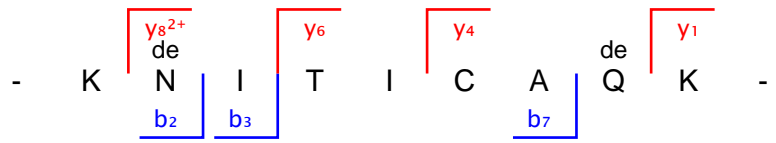

Spectral Annotation for Single-Peptide IDs between Single D11 Cells using Q-OT-LIT



Raw file 2015-01-08\_CL03\_Blastomere-15 Scan 34938 Method ITMS; HCD Score 51.57 m/z 703.37

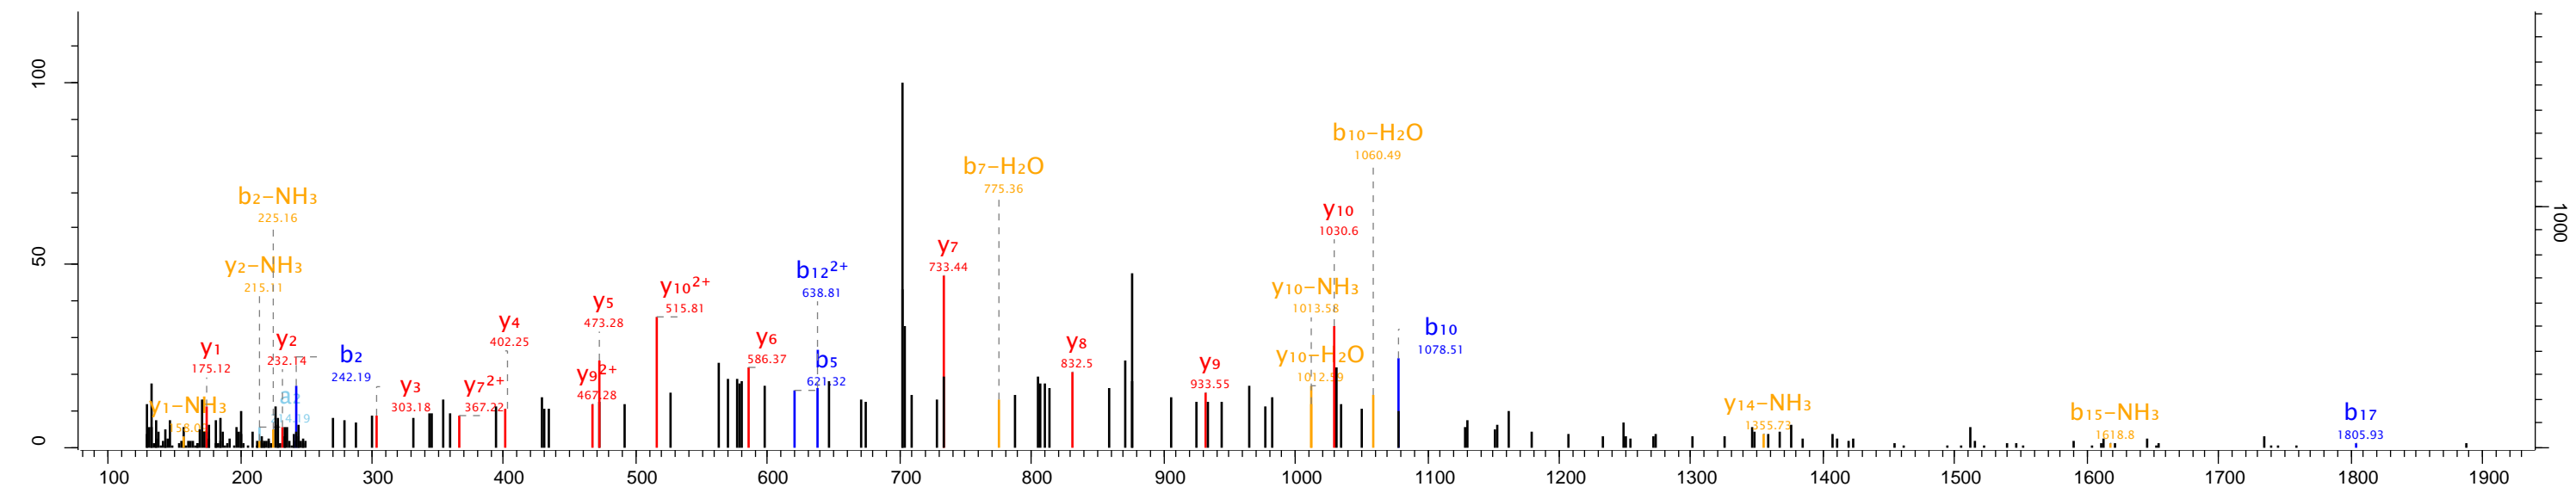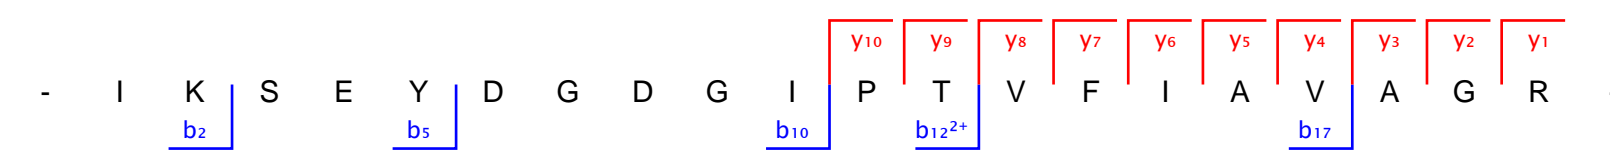

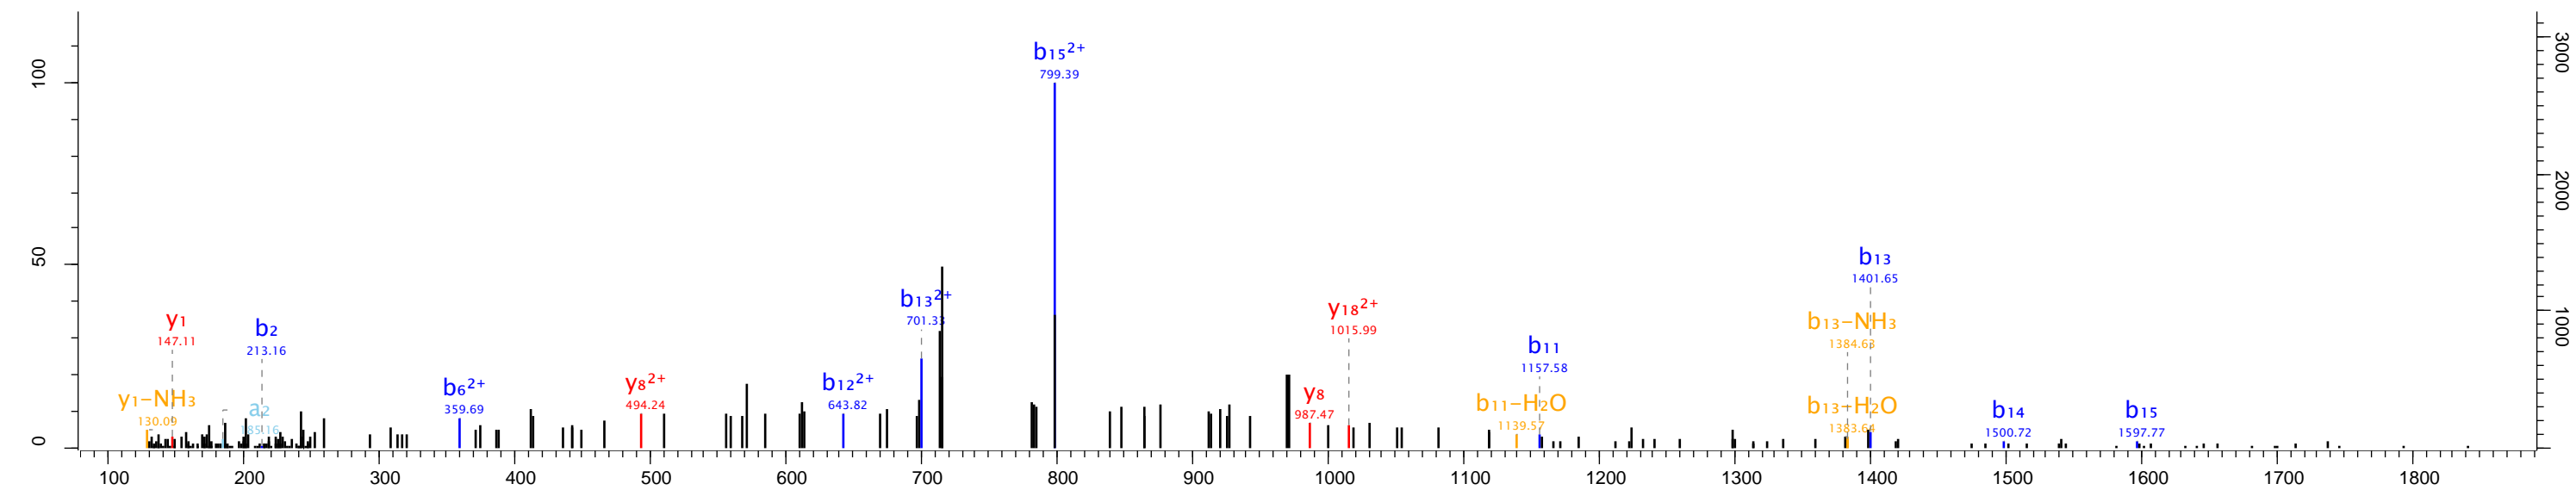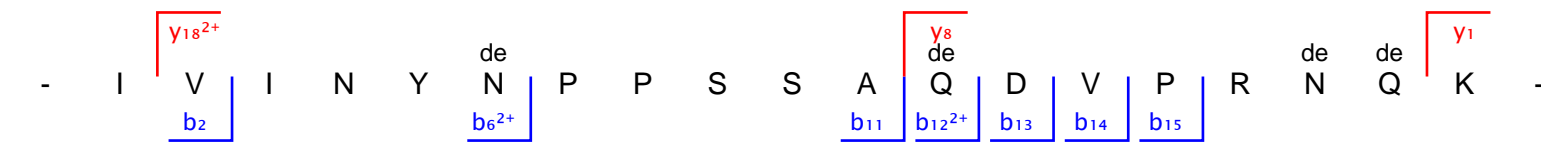

Raw file 2015-01-08\_CL03\_Blastomere-15 Scan 35328 Method ITMS; HCD Score 75.79 m/z 624.84

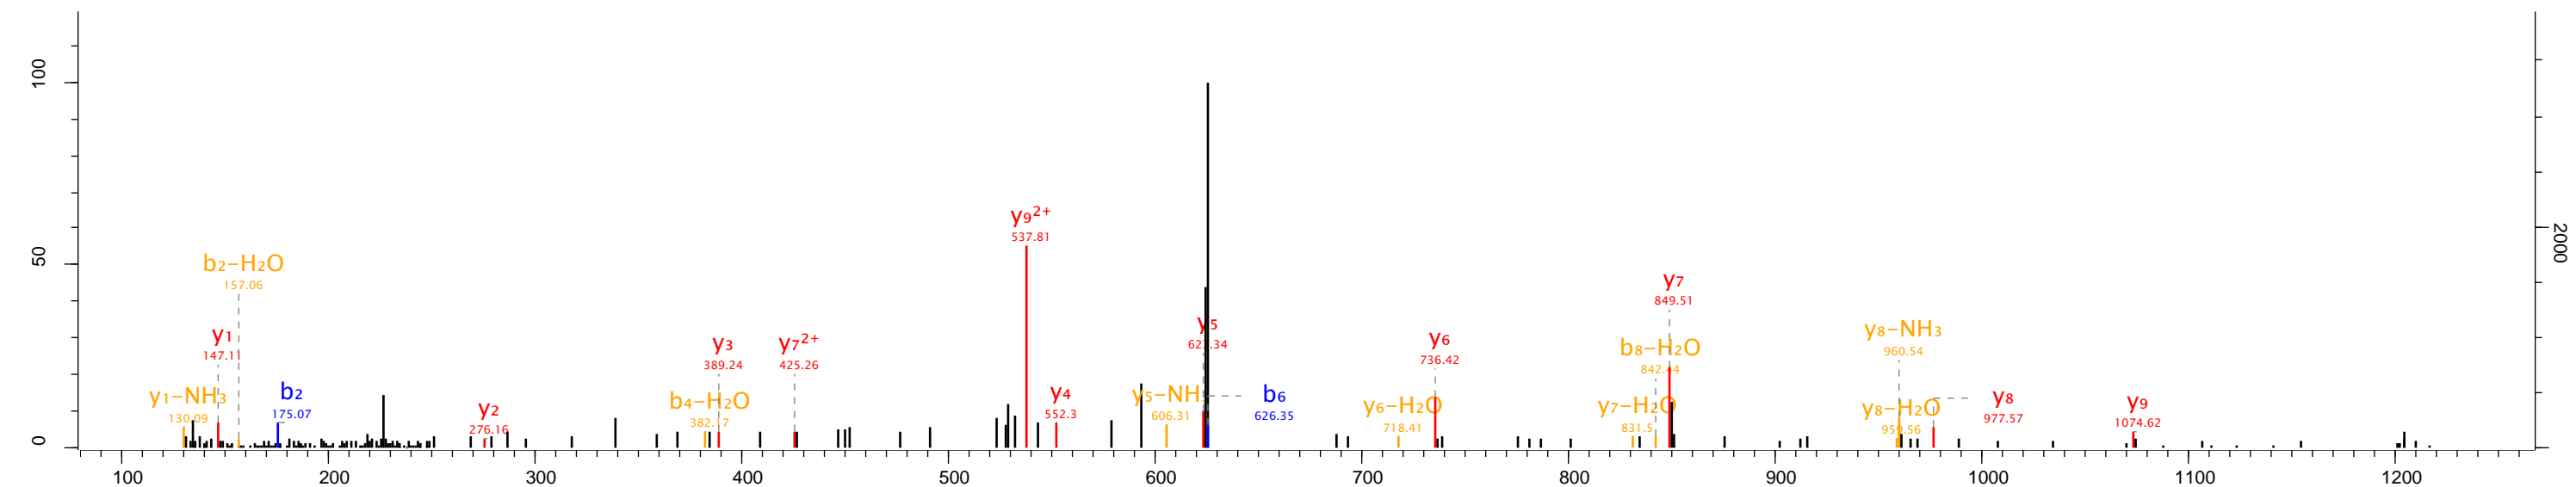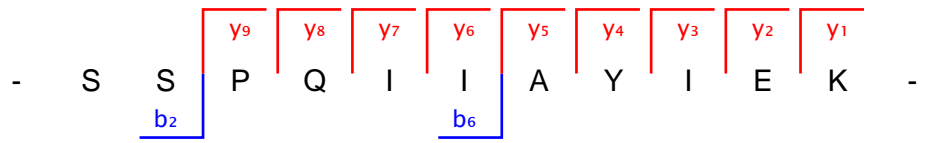

Spectral Annotation for Single-Peptide IDs between Single D11 Cells using Q-OT-LIT

Raw file: 2015-01-08\_CL03\_Blastomere-15  
 Scan: 35432 Method: ITMS; HCD Score: 48.37 m/z: 719.69

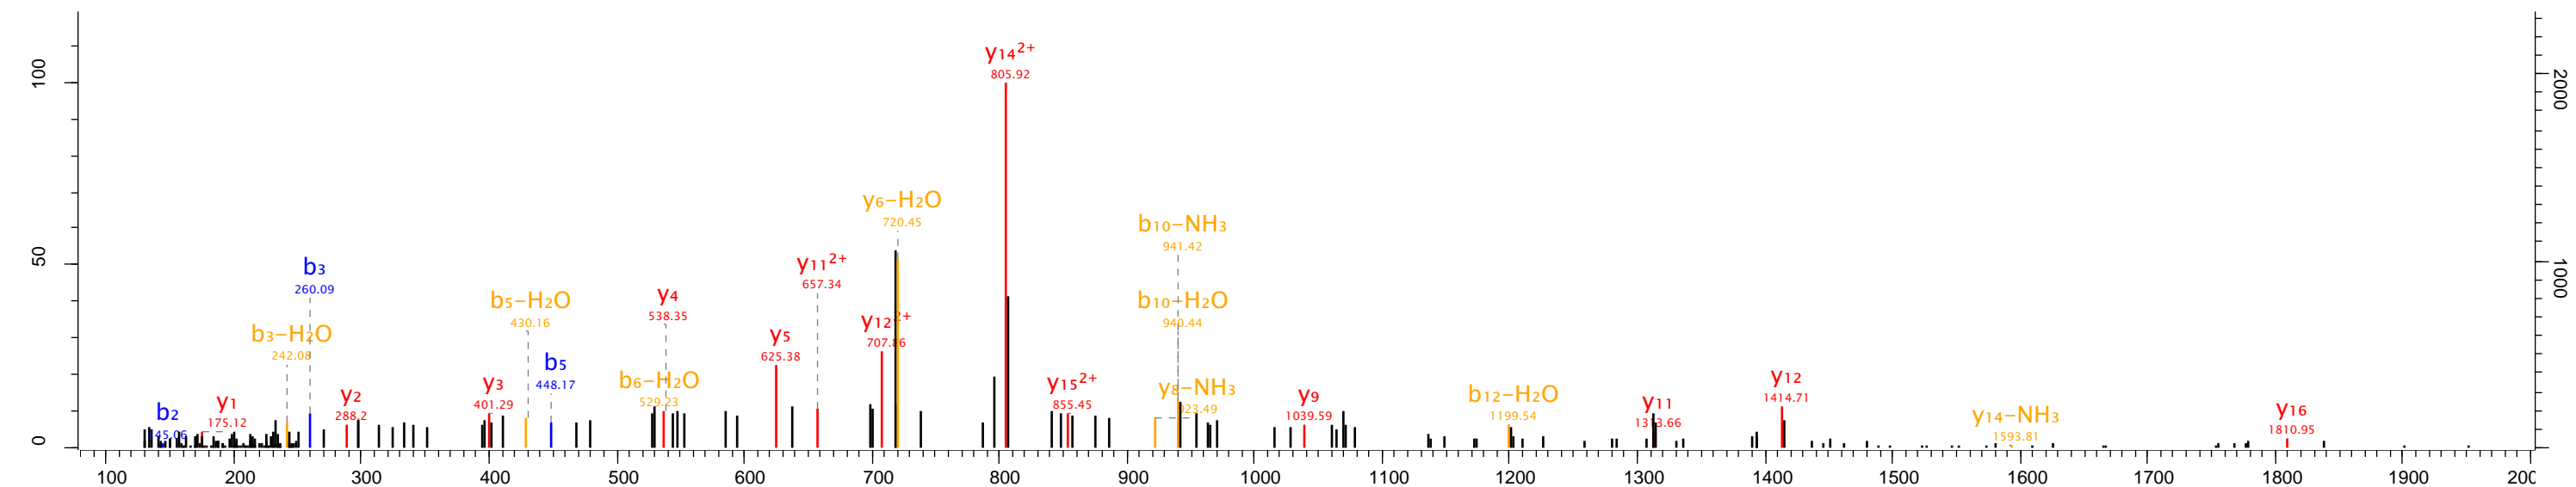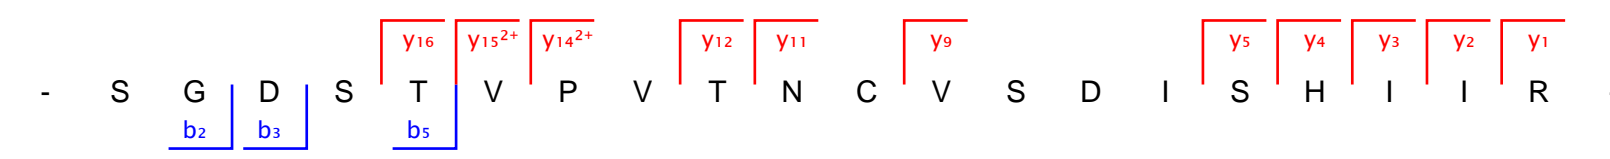

Spectral Annotation for Single-Peptide IDs between Single D11 Cells using Q-OT-LIT

Raw file: 2015-01-08\_CL03\_Blastomere-15  
 Scan: 35444 Method: ITMS; HCD Score: 157.42 m/z: 730.72

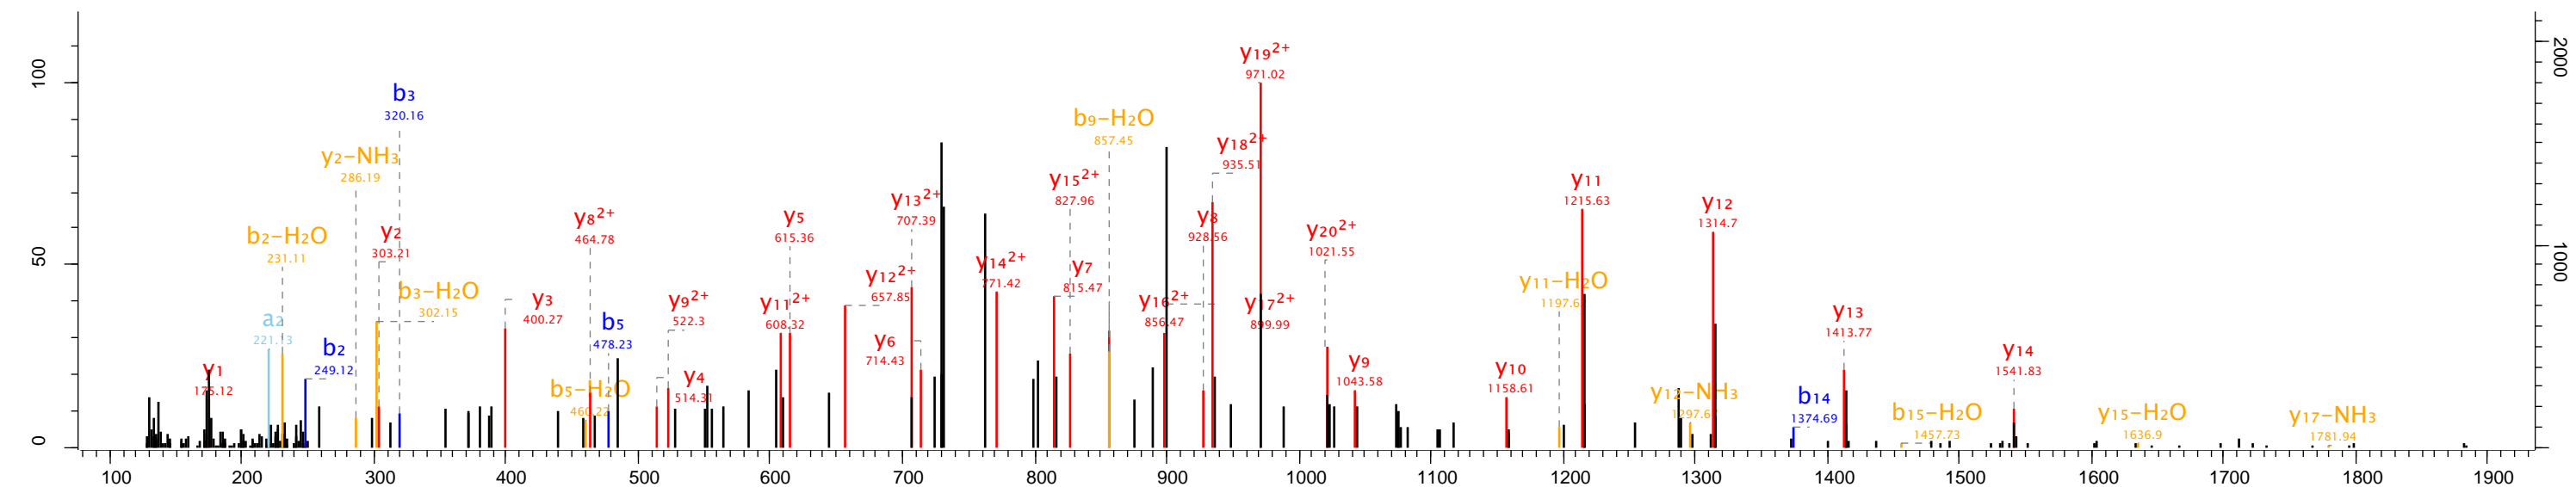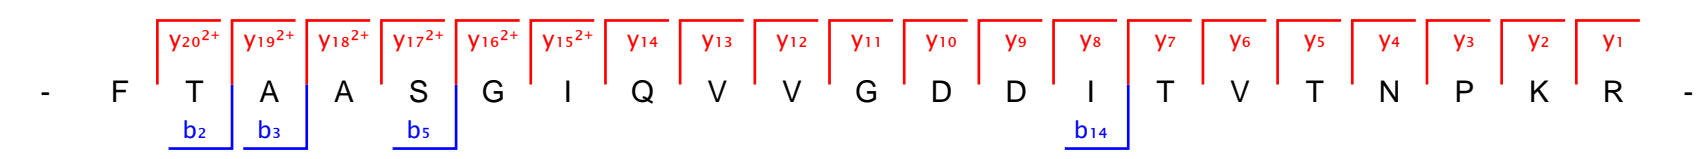

Spectral Annotation for Single-Peptide IDs between Single D11 Cells using Q-OT-LIT

Raw file: 2015-01-08\_CL03\_Blastomere-15  
 Scan: 35463 Method: ITMS; HCD Score: 85.56 m/z: 742.03

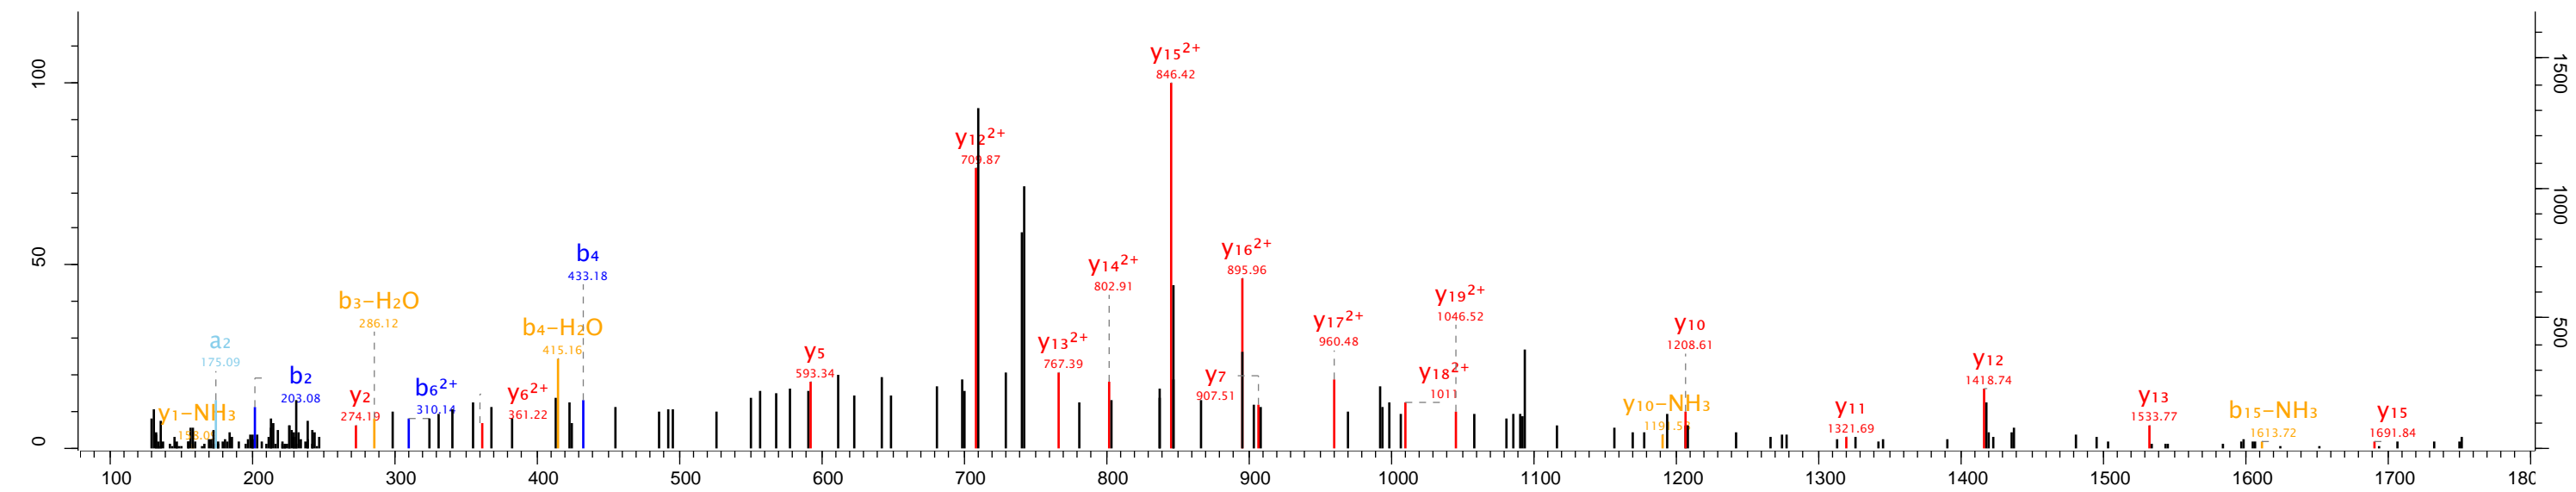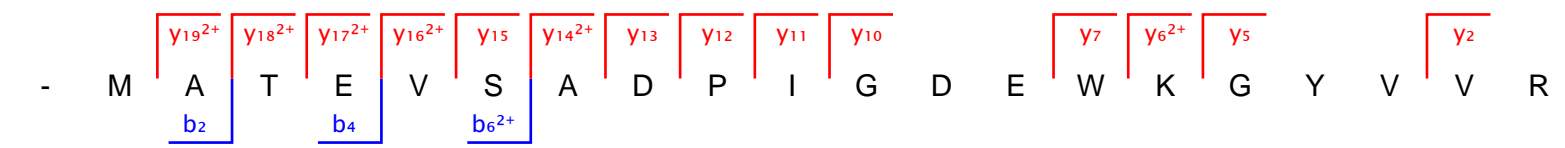

Spectral Annotation for Single-Peptide IDs between Single D11 Cells using Q-OT-LIT

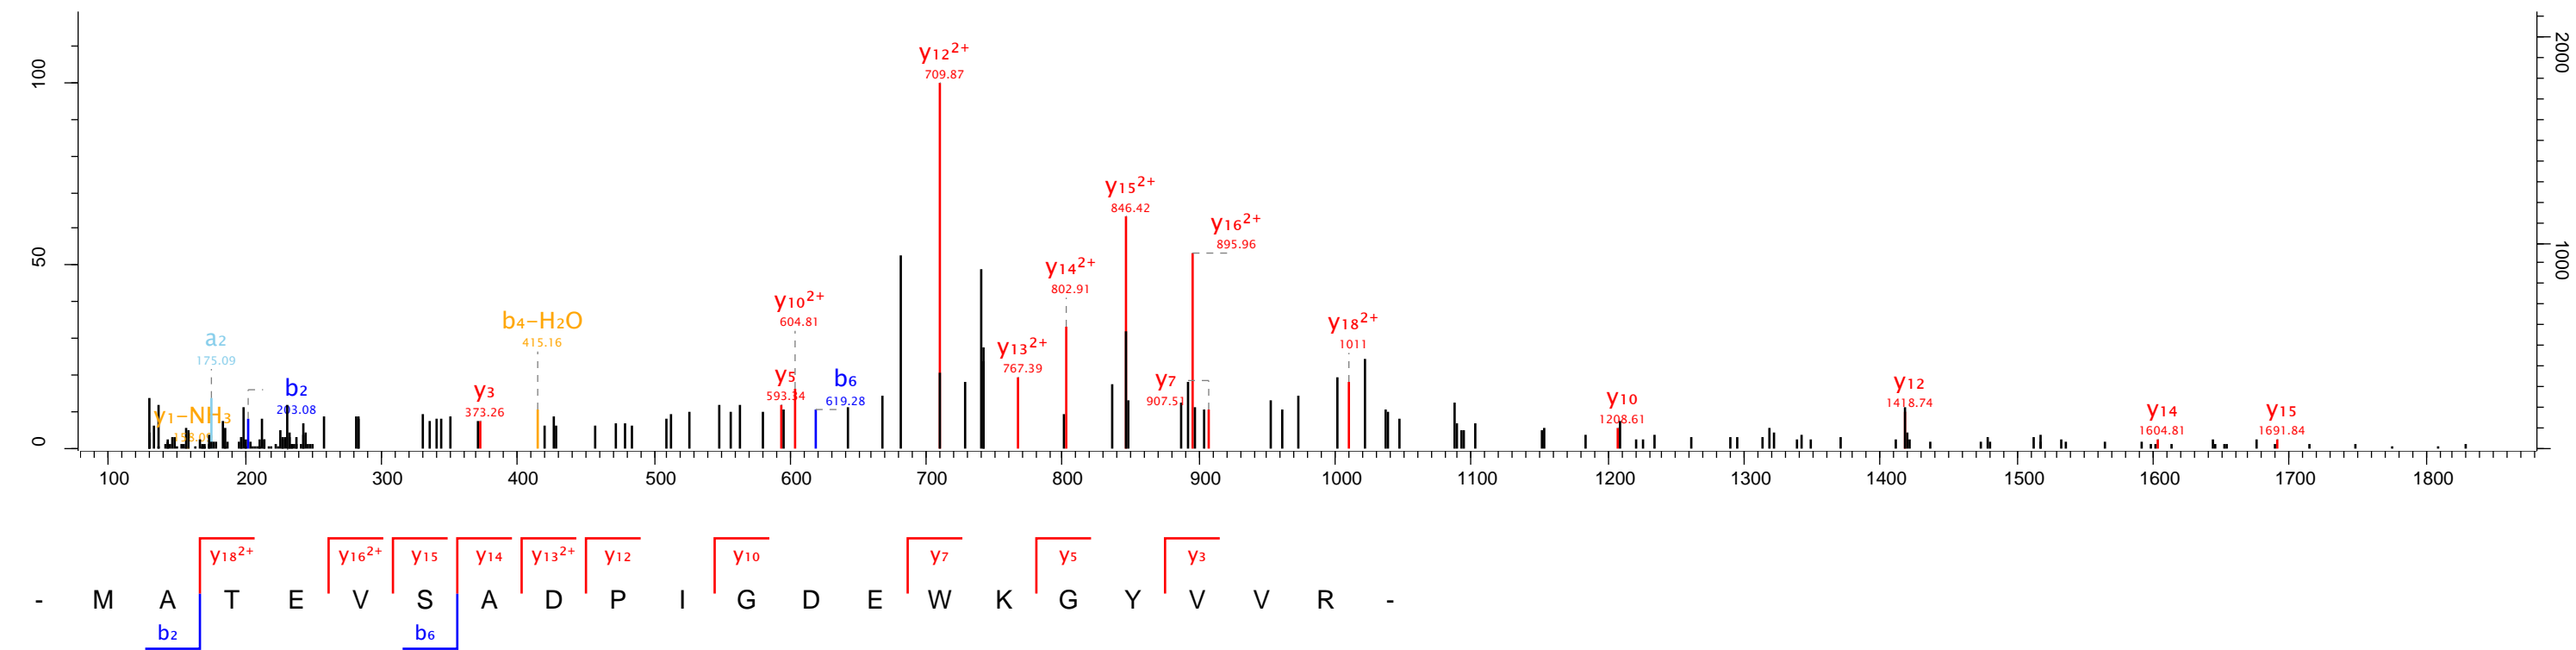

Raw file 2015-01-08\_CL03\_Blastomere-15 Scan 35583 Method ITMS; HCD Score 40.88 m/z 758.37

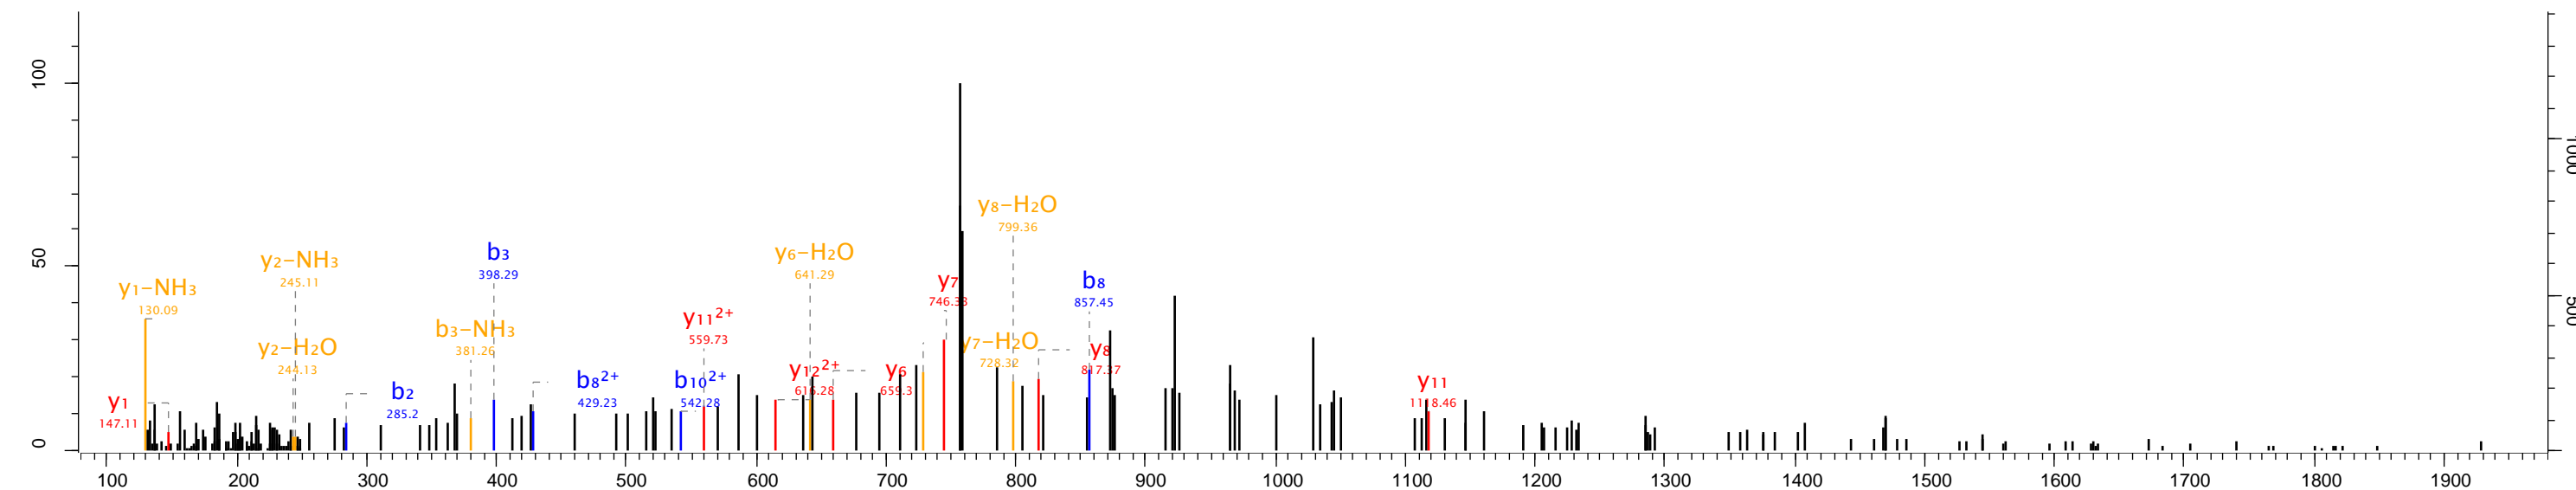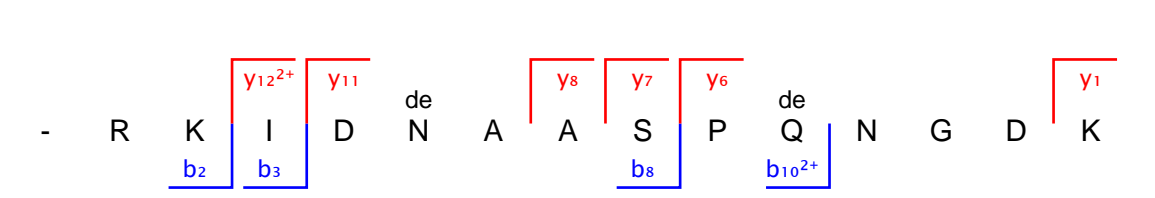

Spectral Annotation for Single-Peptide IDs between Single D11 Cells using Q-OT-LIT



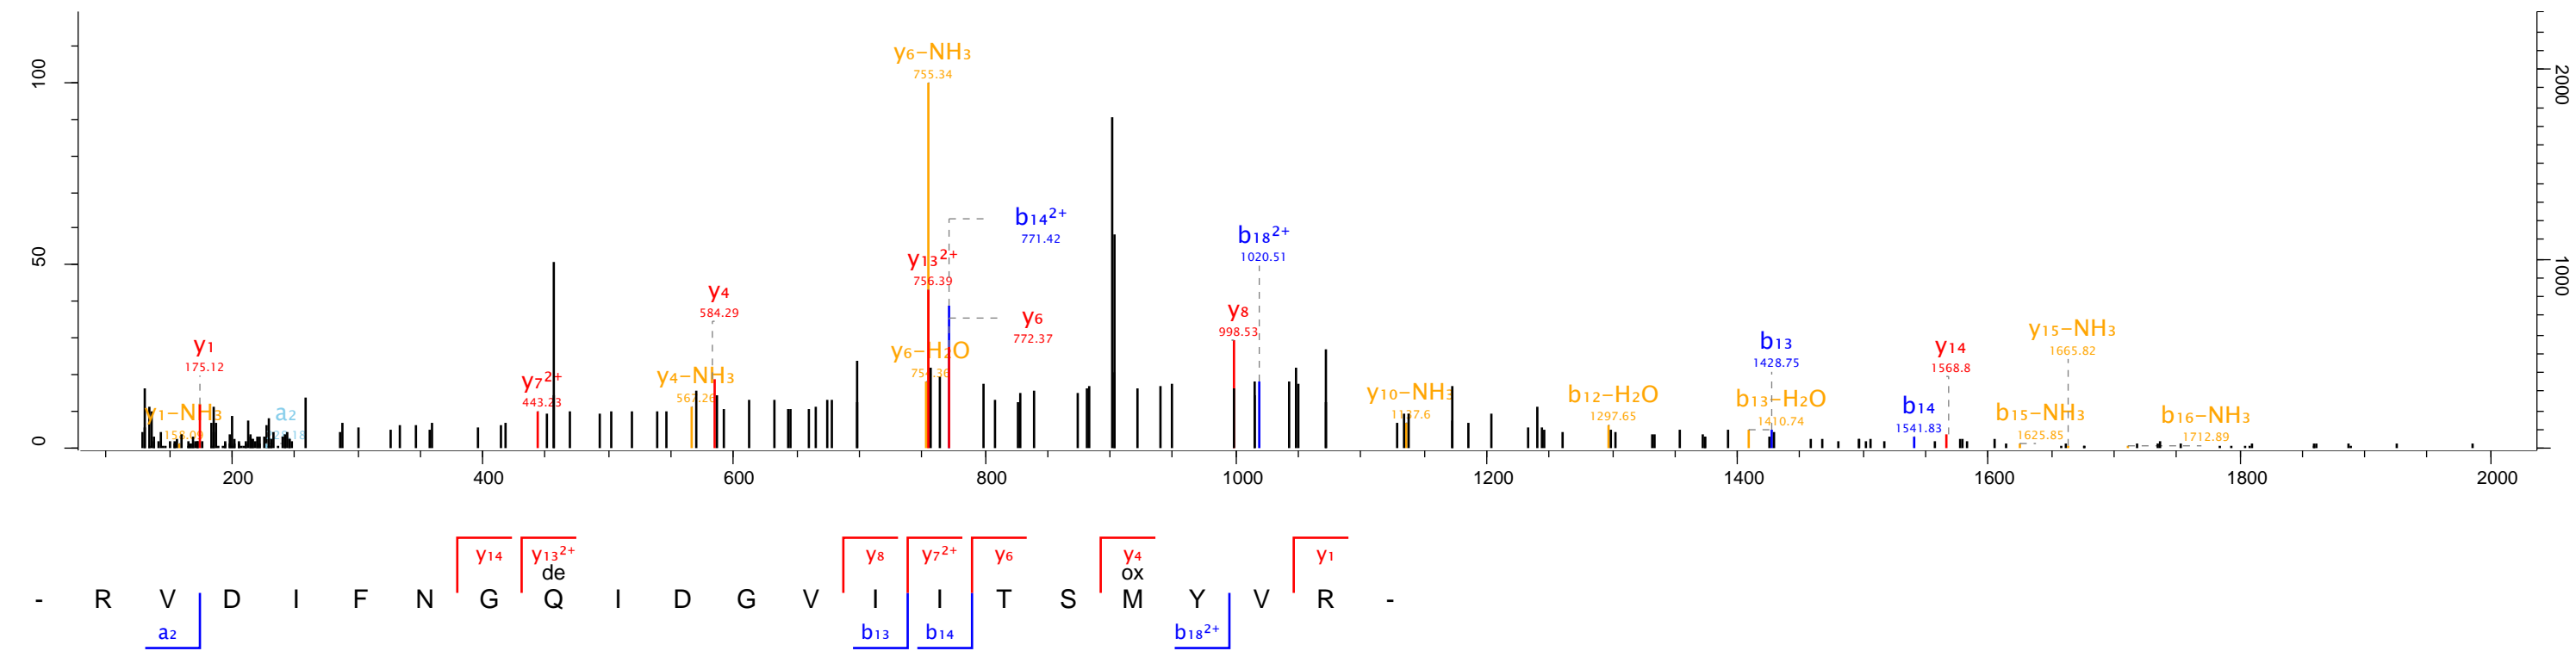

Raw file 2015-01-08\_CL03\_Blastomere-15 Scan 35779 Method ITMS; HCD Score 107.97 m/z 624.85

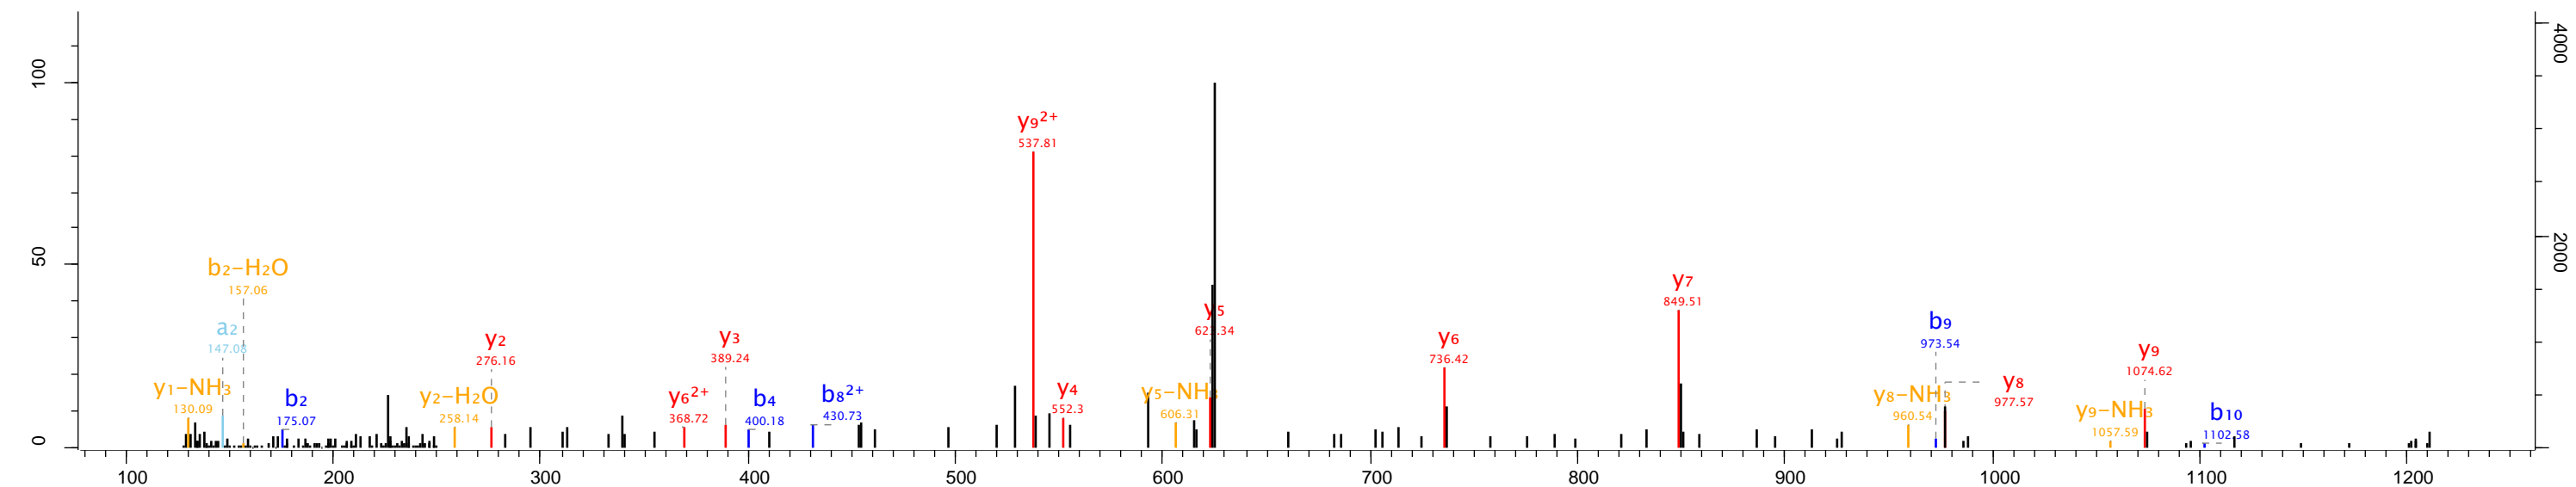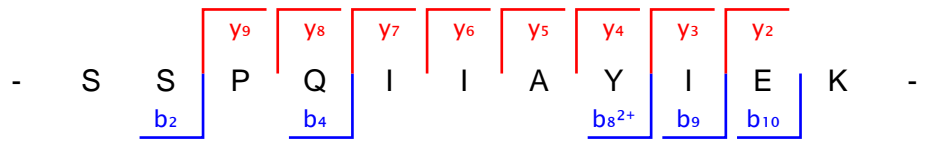

Spectral Annotation for Single-Peptide IDs between Single D11 Cells using Q-OT-LIT

Raw file 2015-01-08\_CL03\_Blastomere-15 Scan 35792 Method ITMS; HCD Score 65.18 m/z 624.84

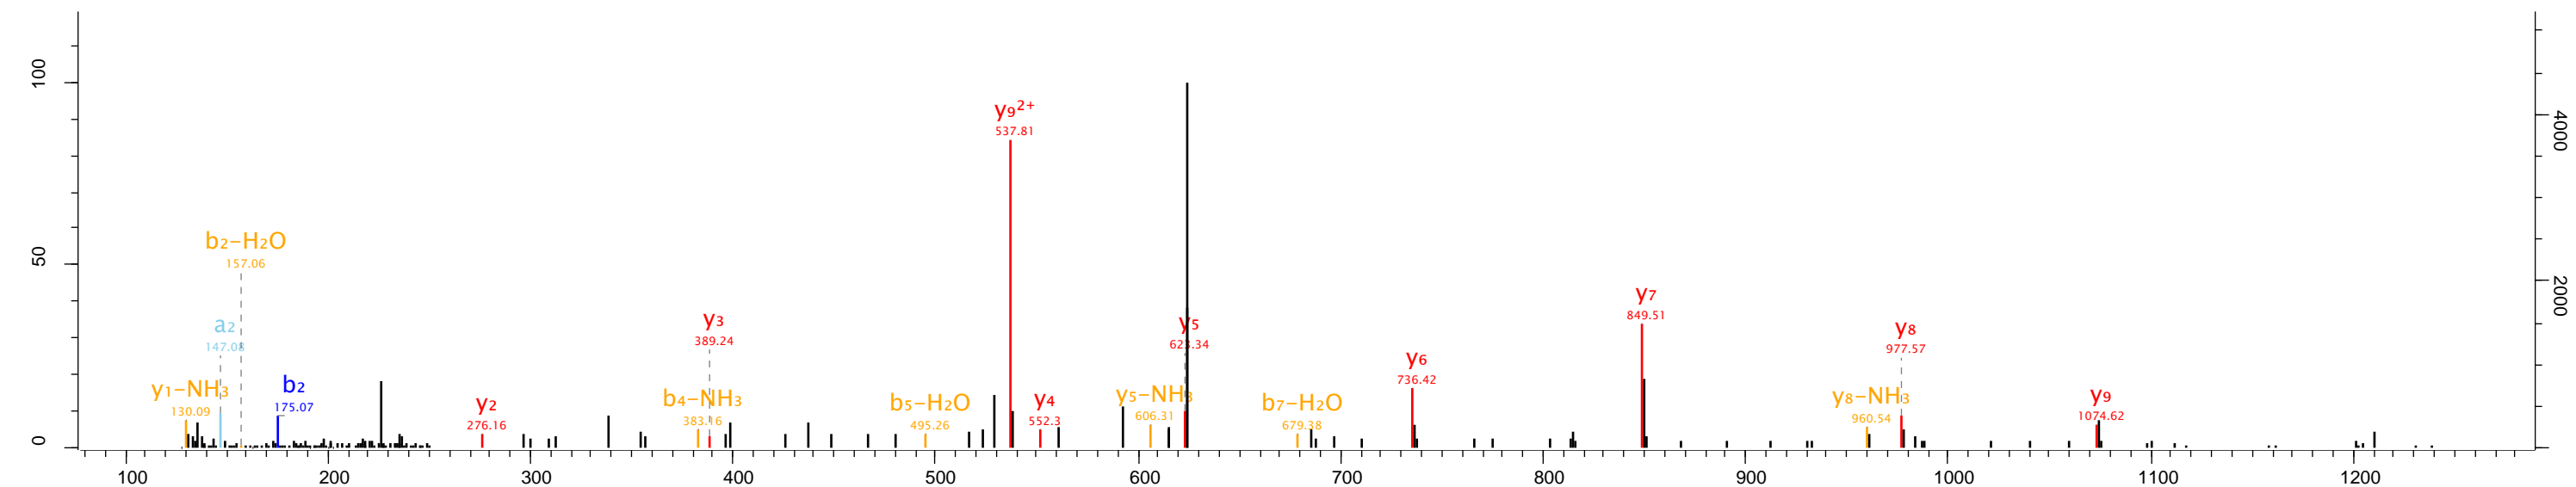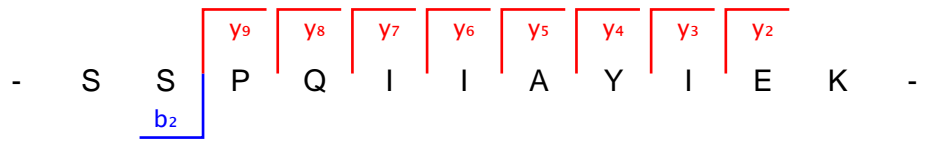

Raw file: 2015-01-08\_CL03\_Blastomere-15  
 Scan: 35807 Method: ITMS; HCD Score: 78.9 m/z: 624.84

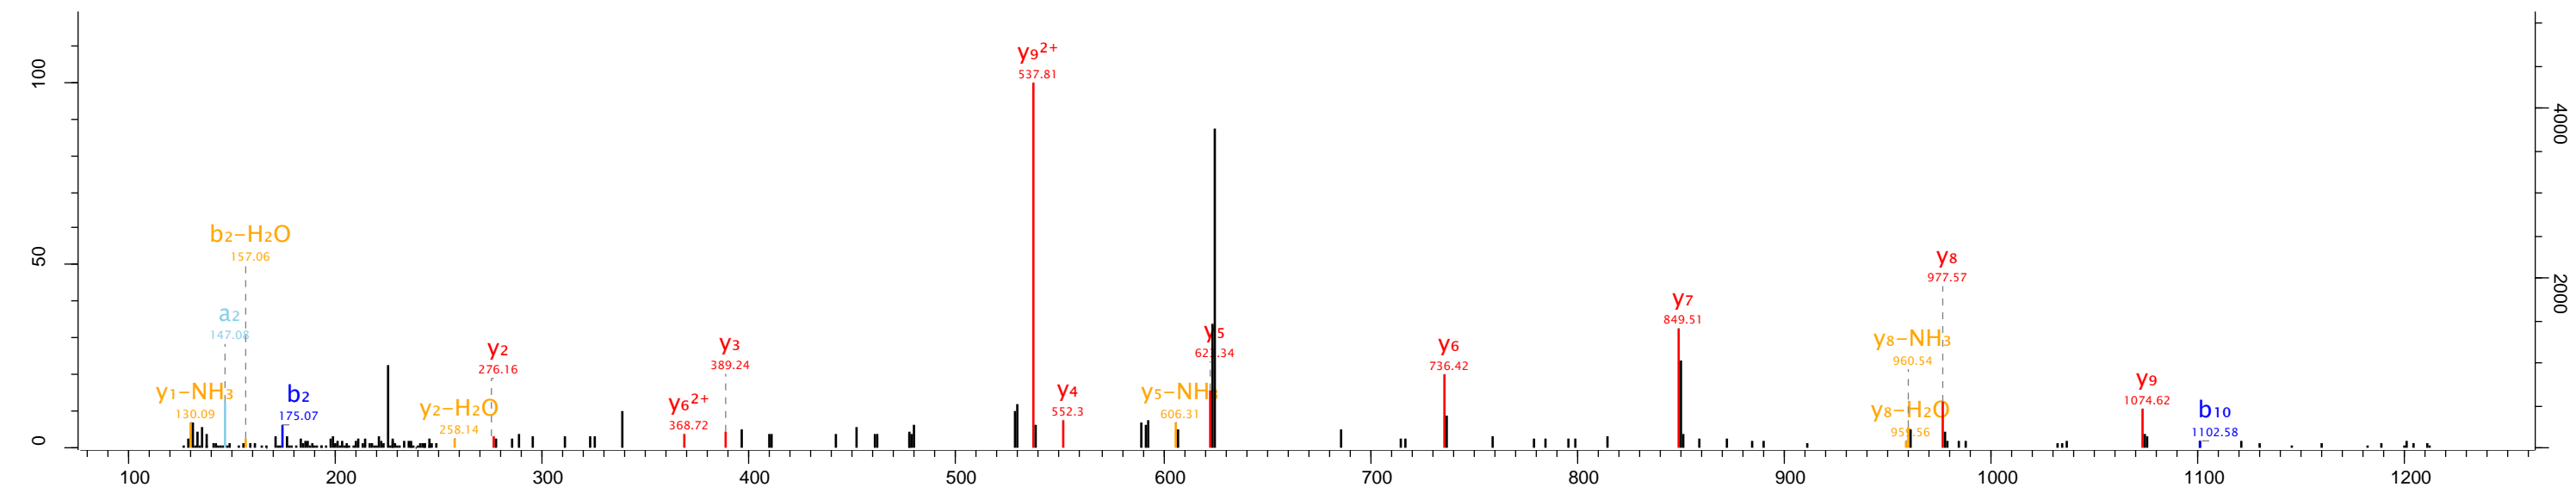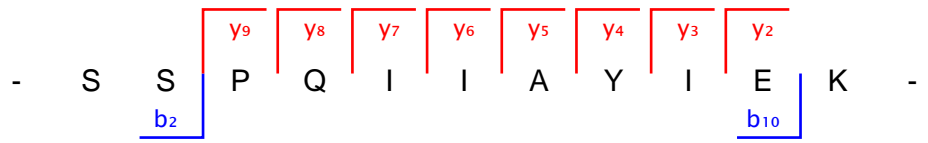

Spectral Annotation for Single-Peptide IDs between Single D11 Cells using Q-OT-LIT

Raw file 2015-01-08\_CL03\_Blastomere-15 Scan 35827 Method ITMS; HCD Score 59.12 m/z 624.84

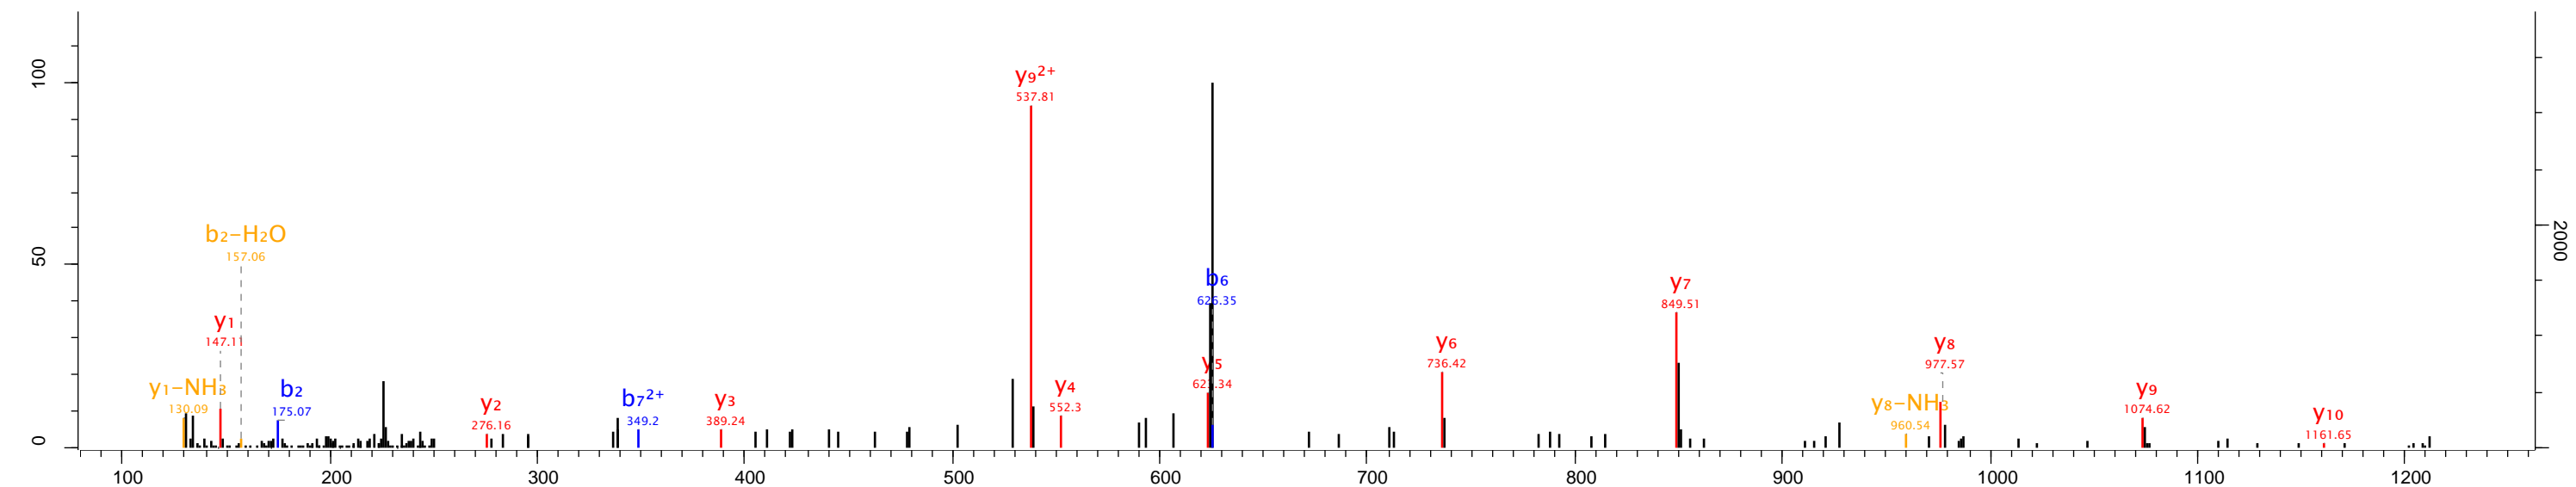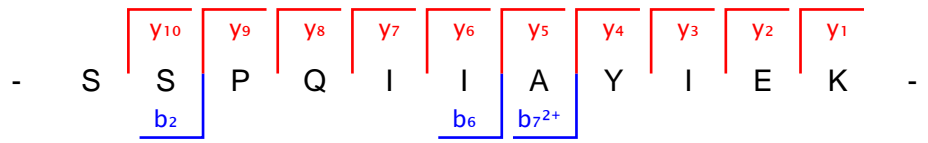

Raw file: 2015-01-08\_CL03\_Blastomere-15  
 Scan: 35849 Method: ITMS; HCD Score: 44.24 m/z: 730.39

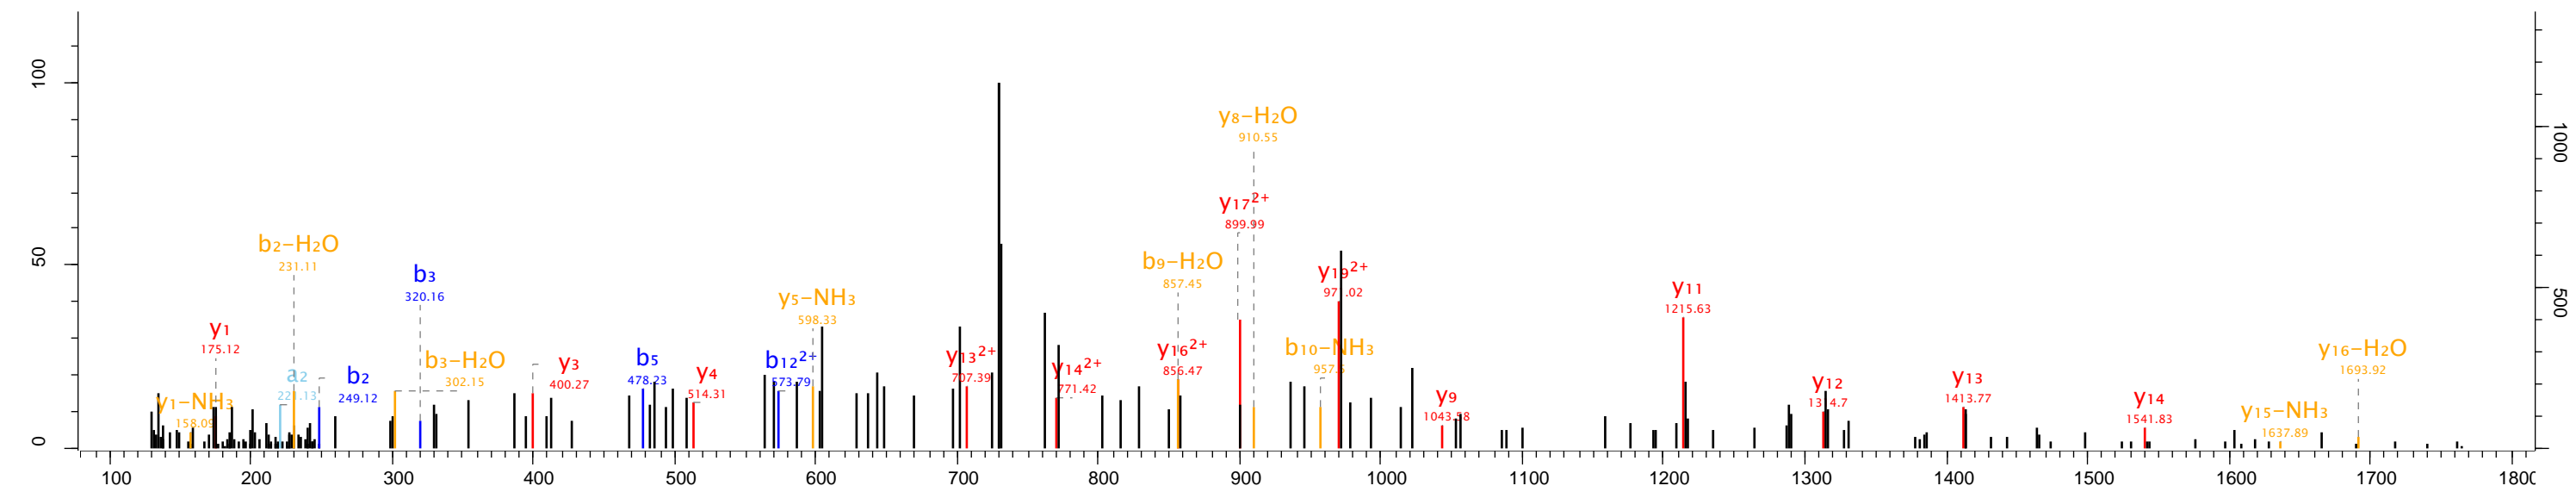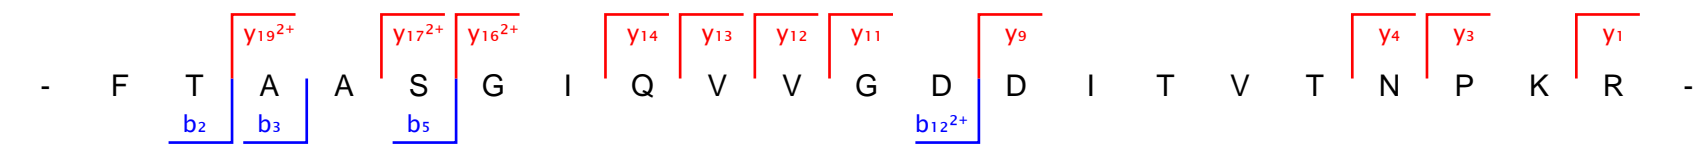

Spectral Annotation for Single-Peptide IDs between Single D11 Cells using Q-OT-LIT

Raw file 2015-01-08\_CL03\_Blastomere-15 Scan 35856 Method ITMS; HCD Score 60.06 m/z 748.69

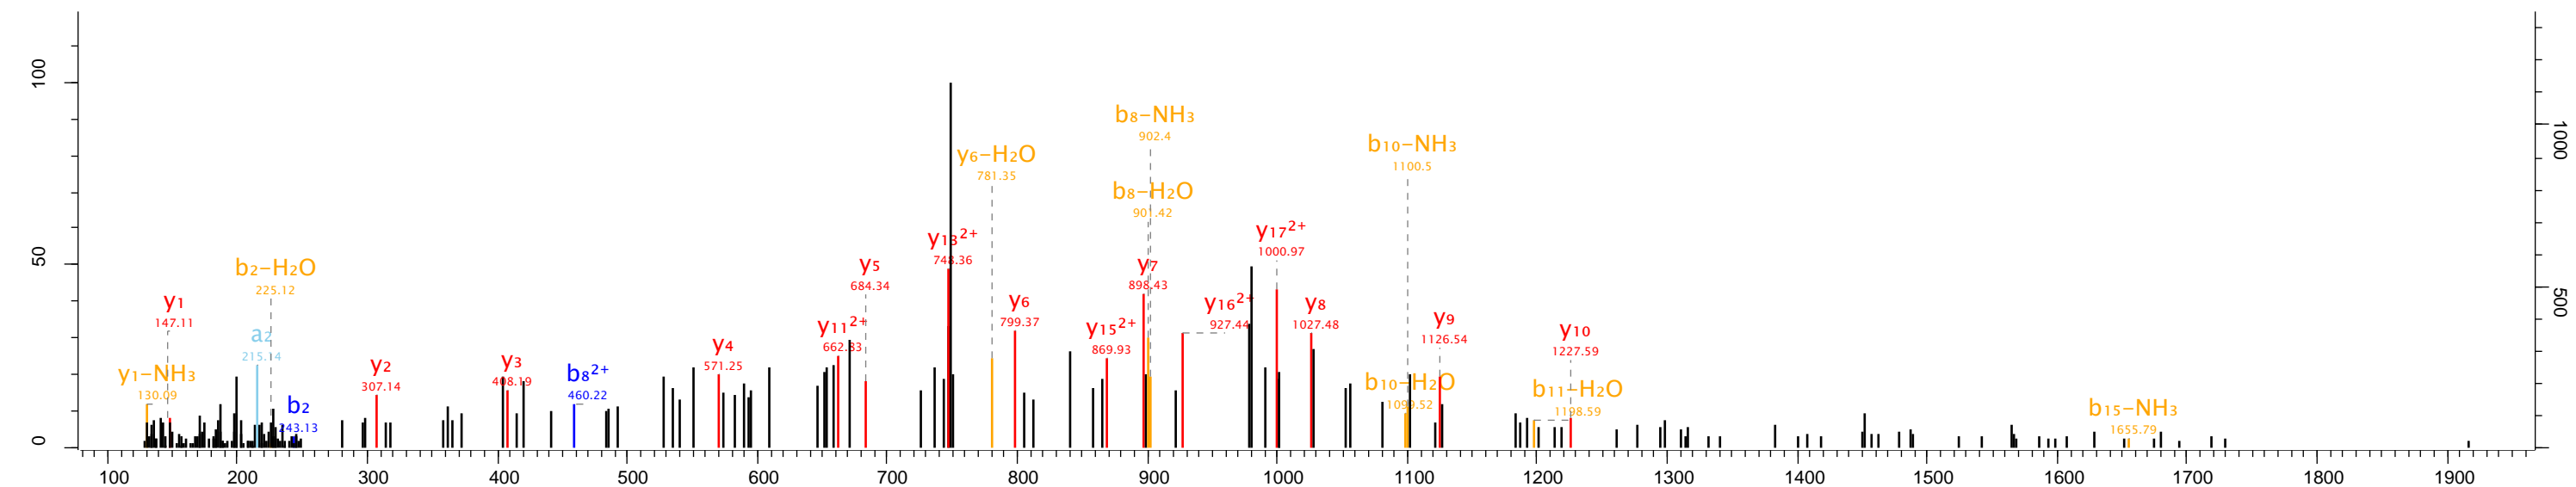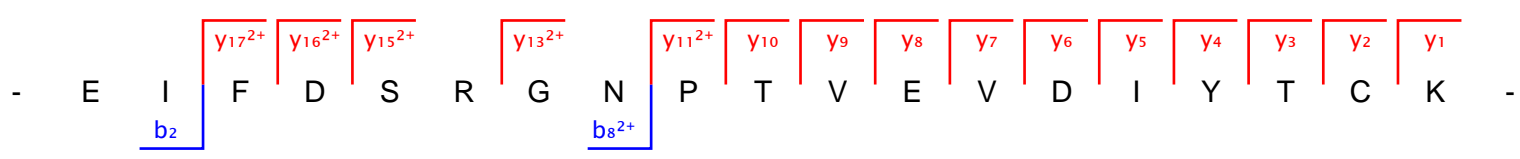

Spectral Annotation for Single-Peptide IDs between Single D11 Cells using Q-OT-LIT

Raw file 2015-01-08\_CL03\_Blastomere-15 Scan 35870 Method ITMS; HCD Score 66.26 m/z 748.69

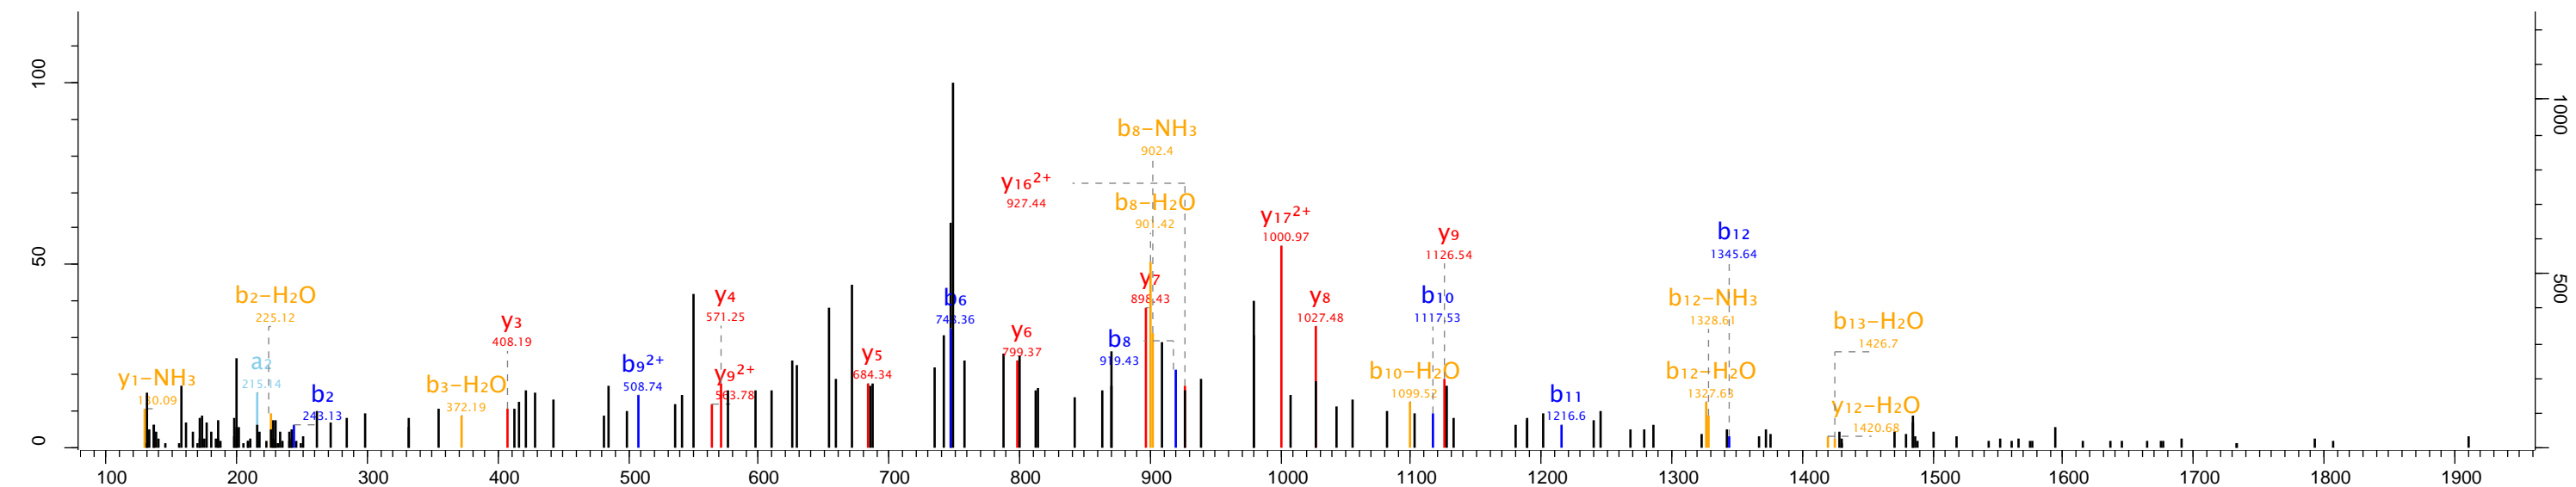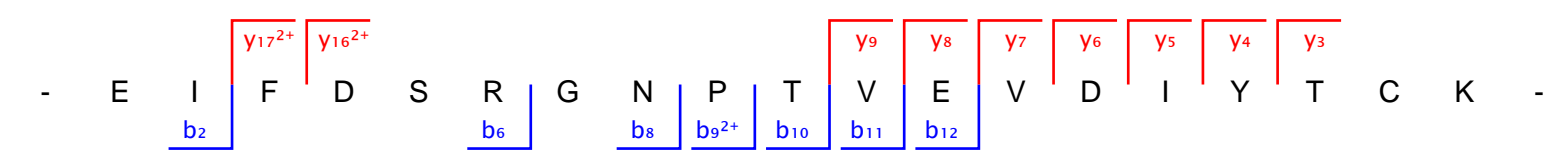

Spectral Annotation for Single-Peptide IDs between Single D11 Cells using Q-OT-LIT



Raw file 2015-01-08\_CL03\_Blastomere-15 Scan 35871 Method ITMS; HCD Score 73.06 m/z 730.72

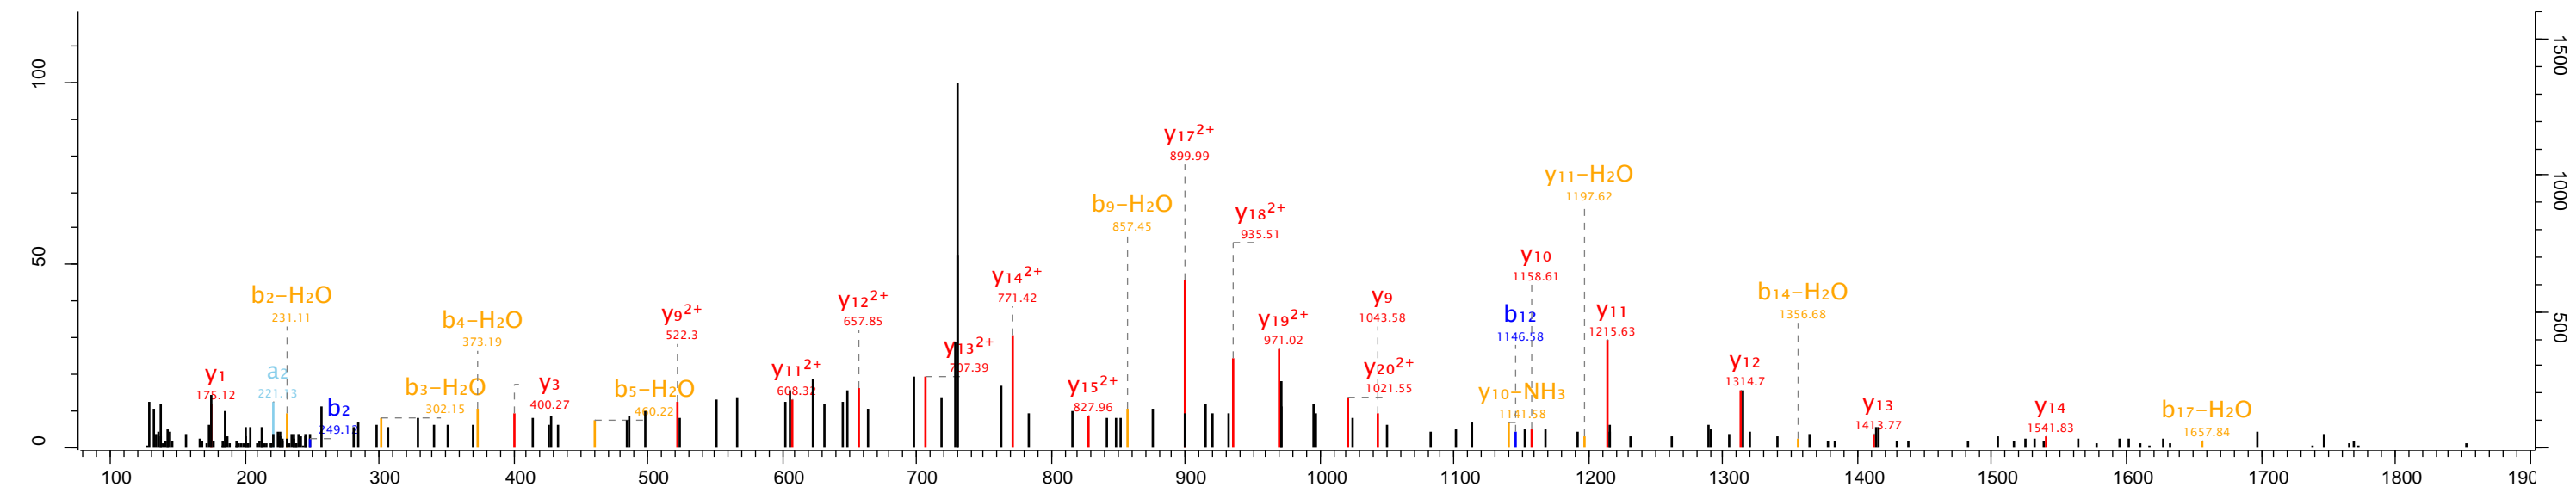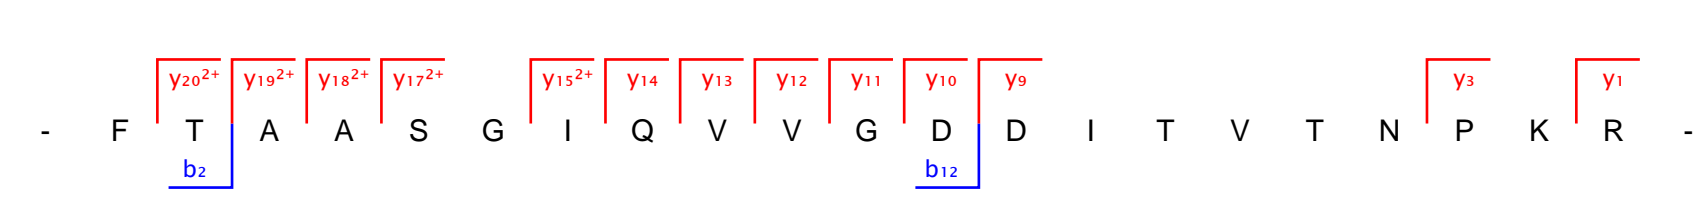

Raw file 2015-01-08\_CL03\_Blastomere-15 Scan 35889 Method ITMS; HCD Score 62.62 m/z 730.39

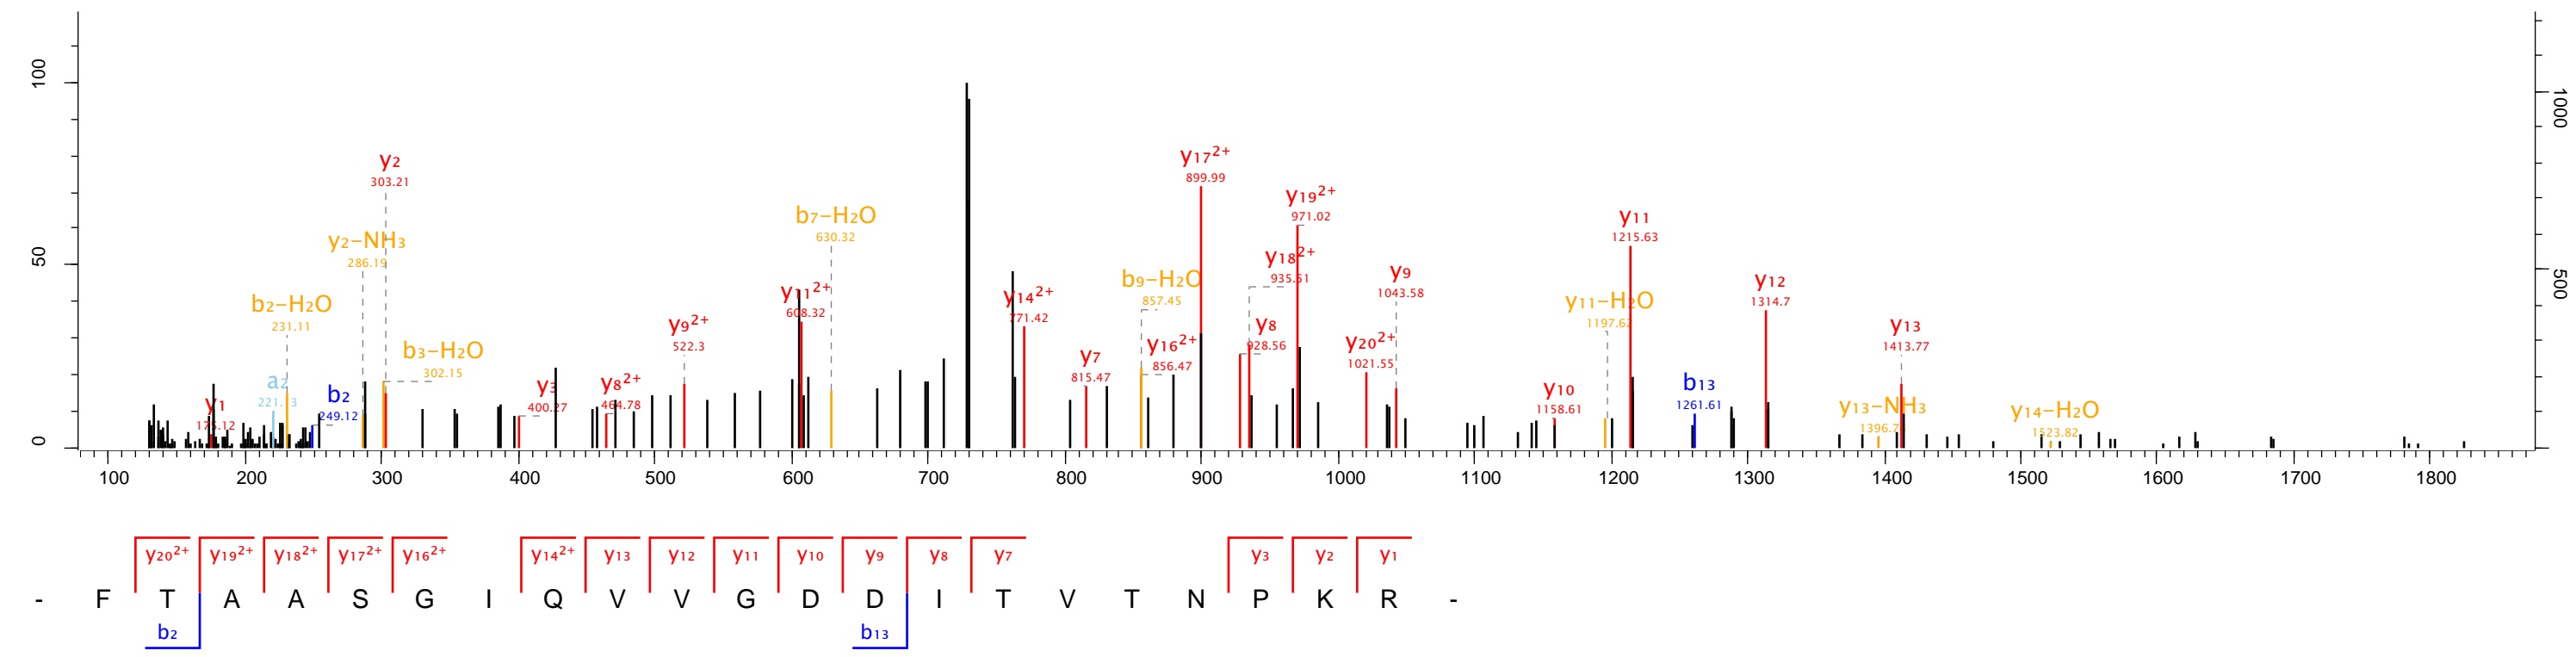

Spectral Annotation for Single-Peptide IDs between Single D11 Cells using Q-OT-LIT

Raw file 2015-01-08\_CL03\_Blastomere-15 Scan 36124 Method ITMS; HCD Score 115.91 m/z 581.31

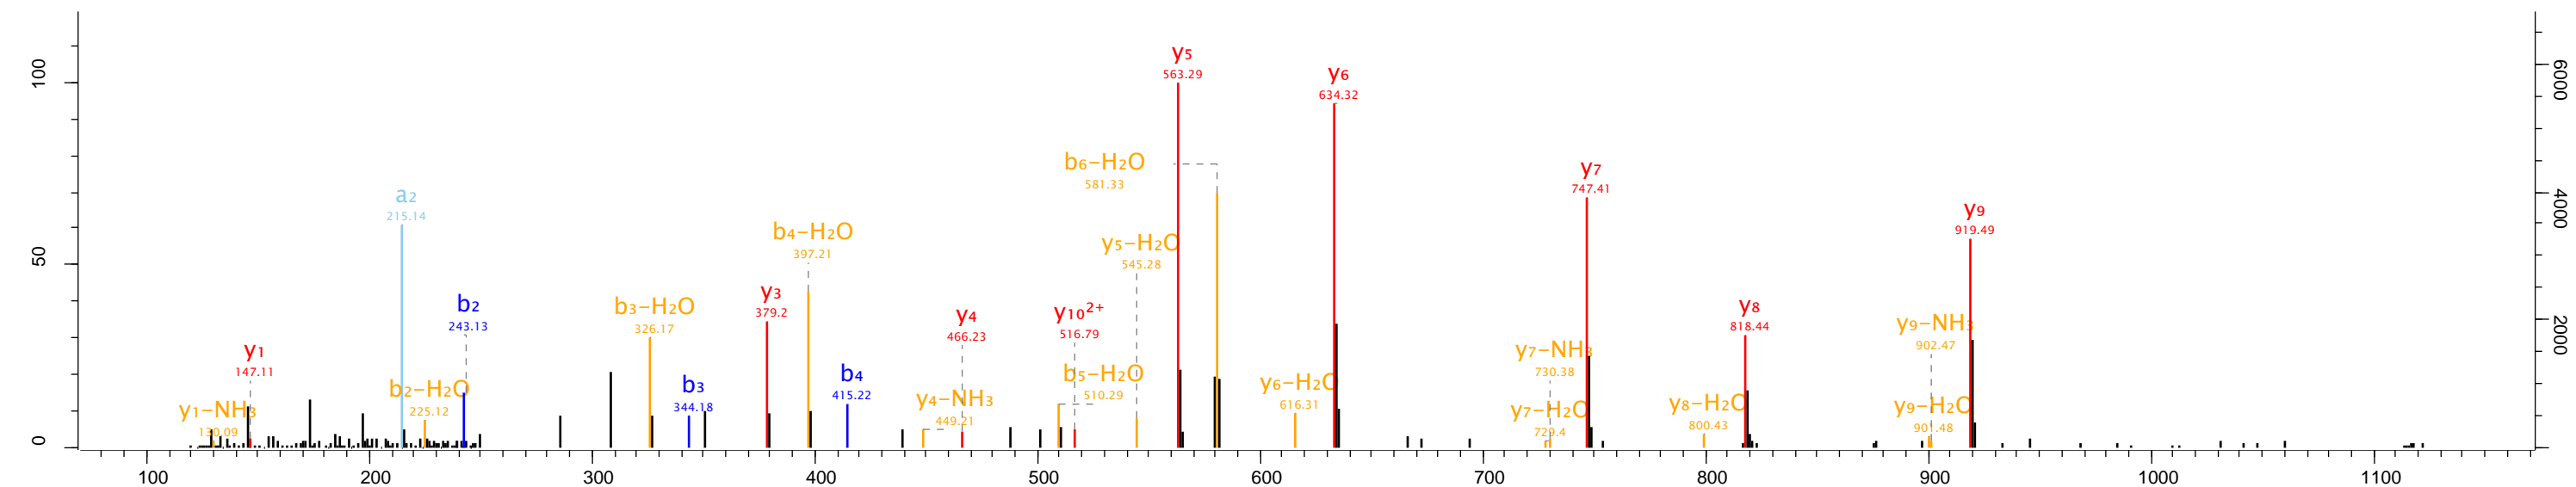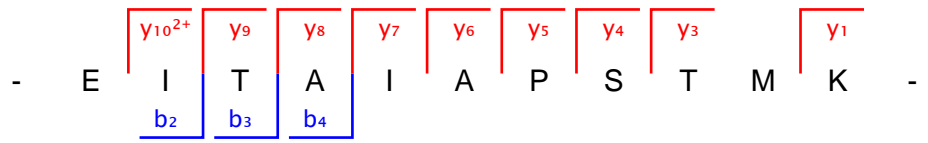

Spectral Annotation for Single-Peptide IDs between Single D11 Cells using Q-OT-LIT

Raw file: 2015-01-08\_CL03\_Blastomere-15  
 Scan: 36431 Method: ITMS; HCD Score: 61.24 m/z: 581.31

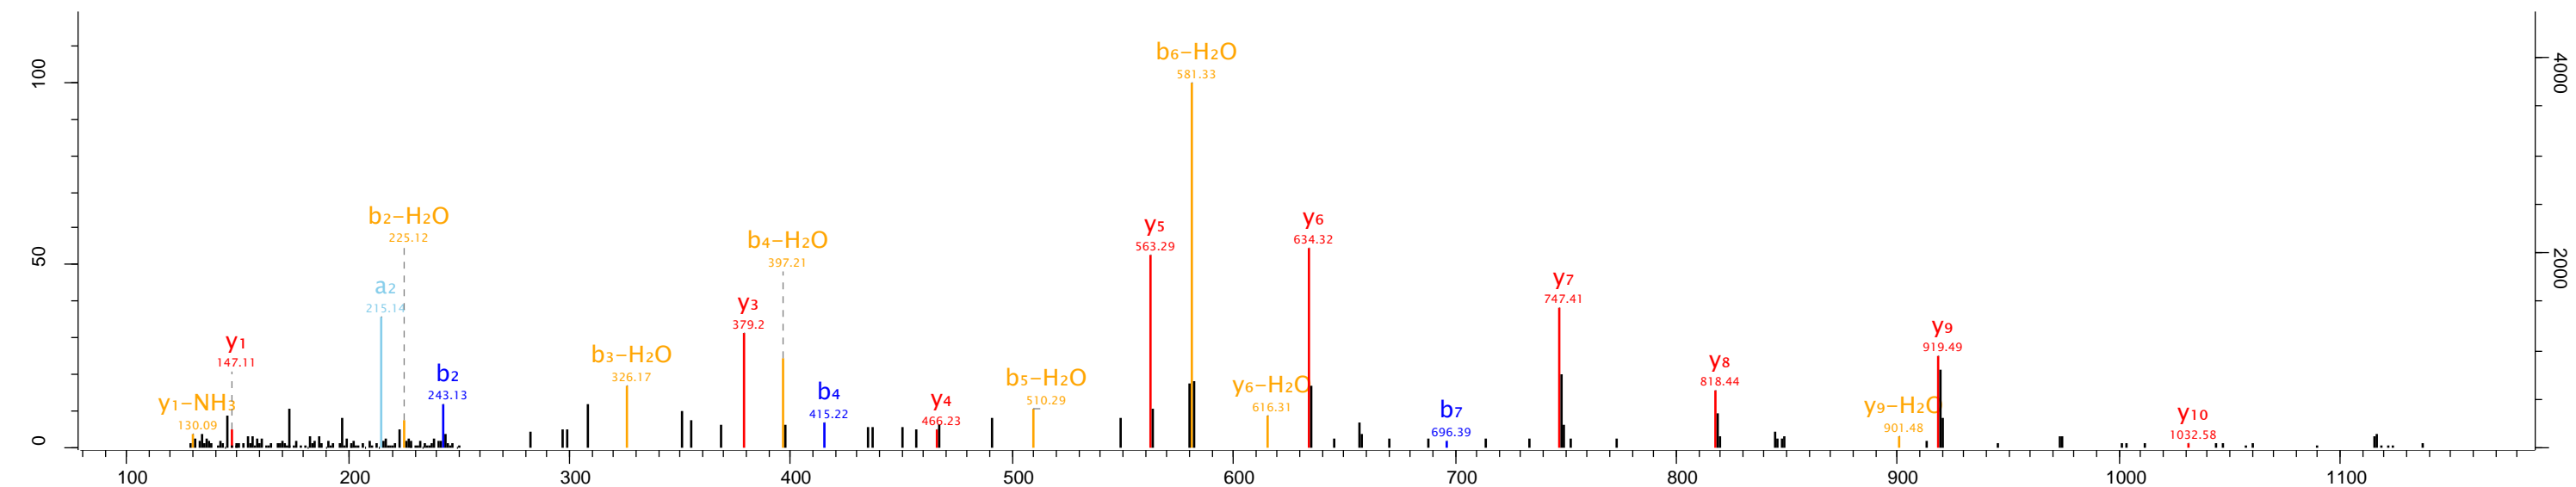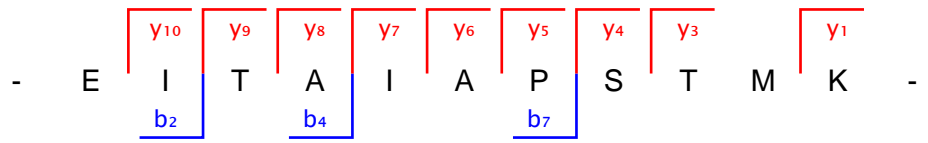

Spectral Annotation for Single-Peptide IDs between Single D11 Cells using Q-OT-LIT

Raw file 2015-01-08\_CL03\_Blastomere-15 Scan 36656 Method ITMS; HCD Score 73.84 m/z 674.85

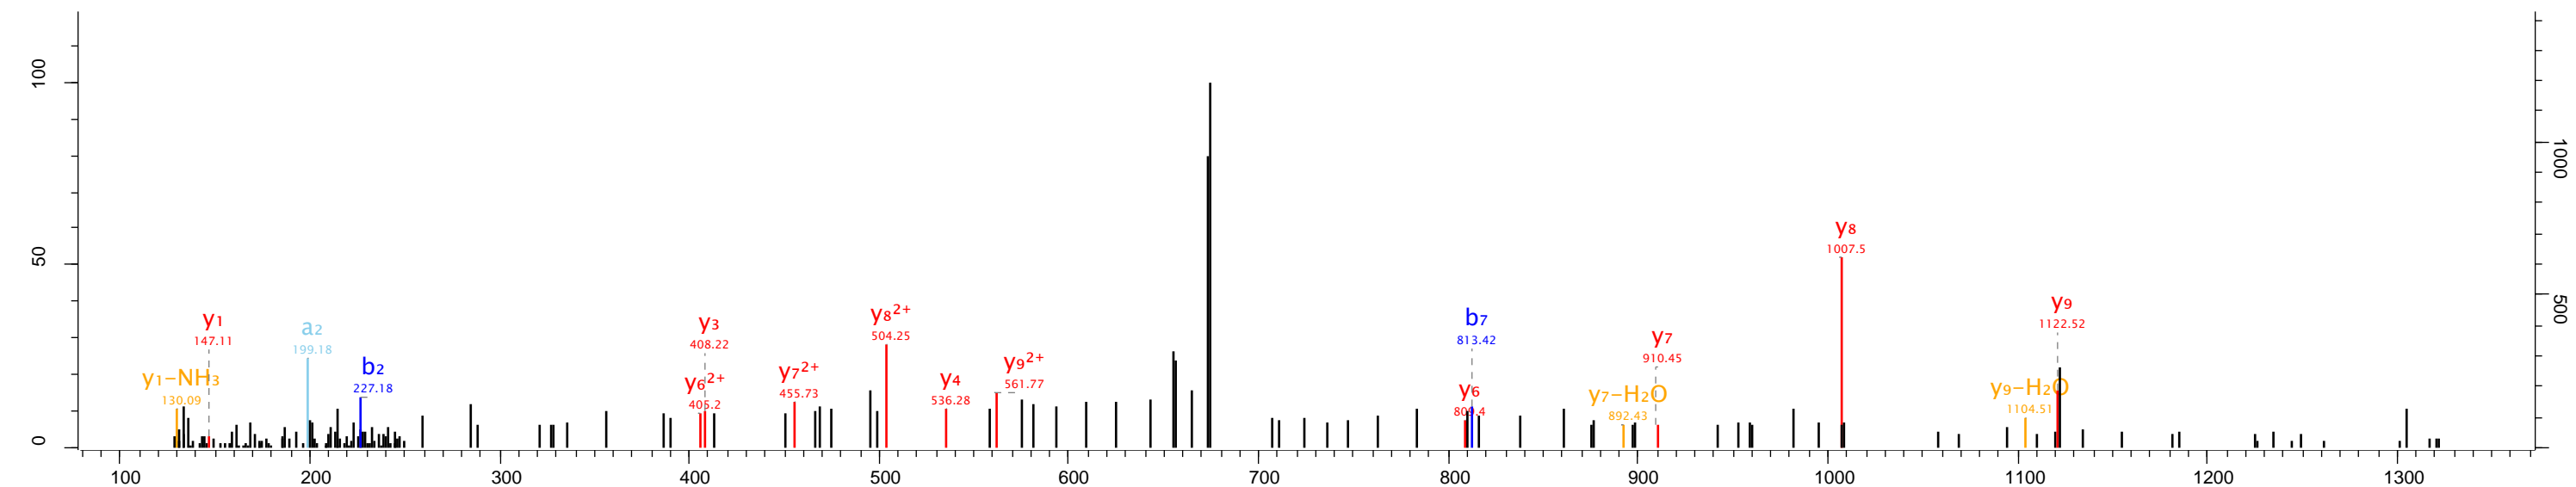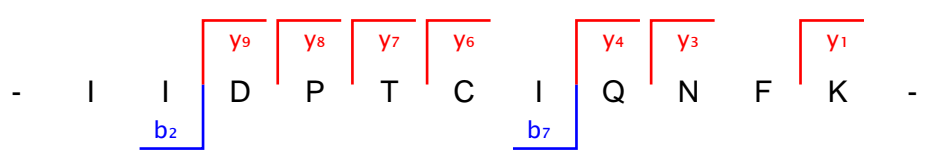

Raw file 2015-01-08\_CL03\_Blastomere-15 Scan 36707 Method ITMS; HCD Score 71.03 m/z 674.85

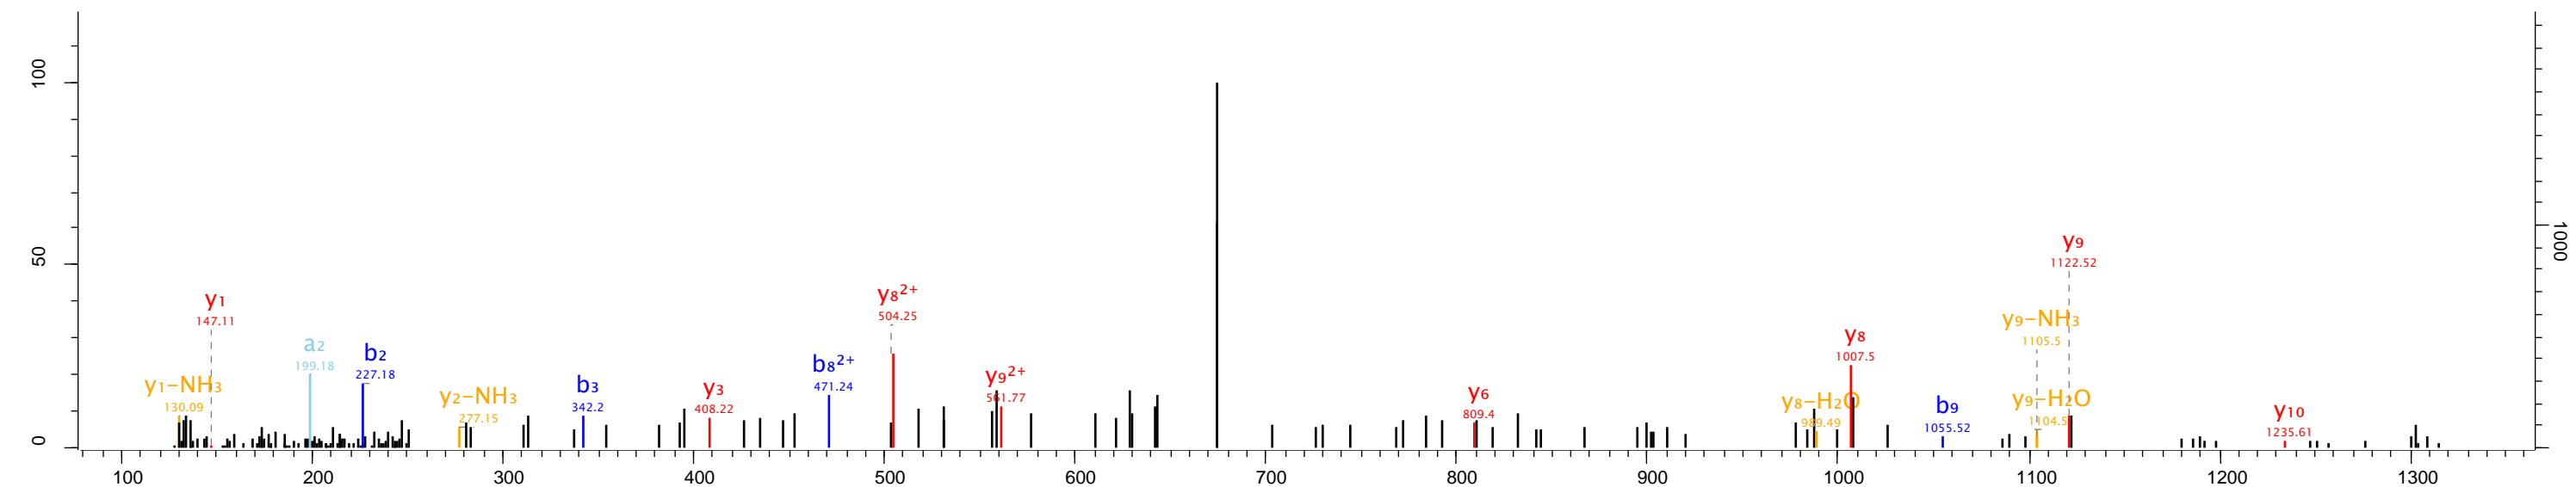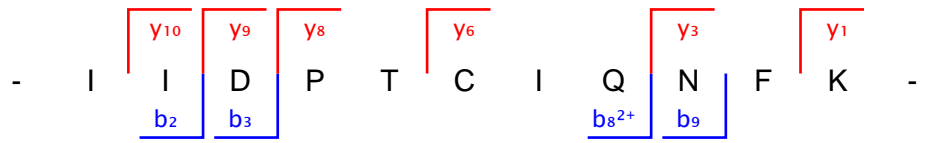

Spectral Annotation for Single-Peptide IDs between Single D11 Cells using Q-OT-LIT

Raw file 2015-01-08\_CL03\_Blastomere-15 Scan 36919 Method ITMS; HCD Score 64.22 m/z 599.76

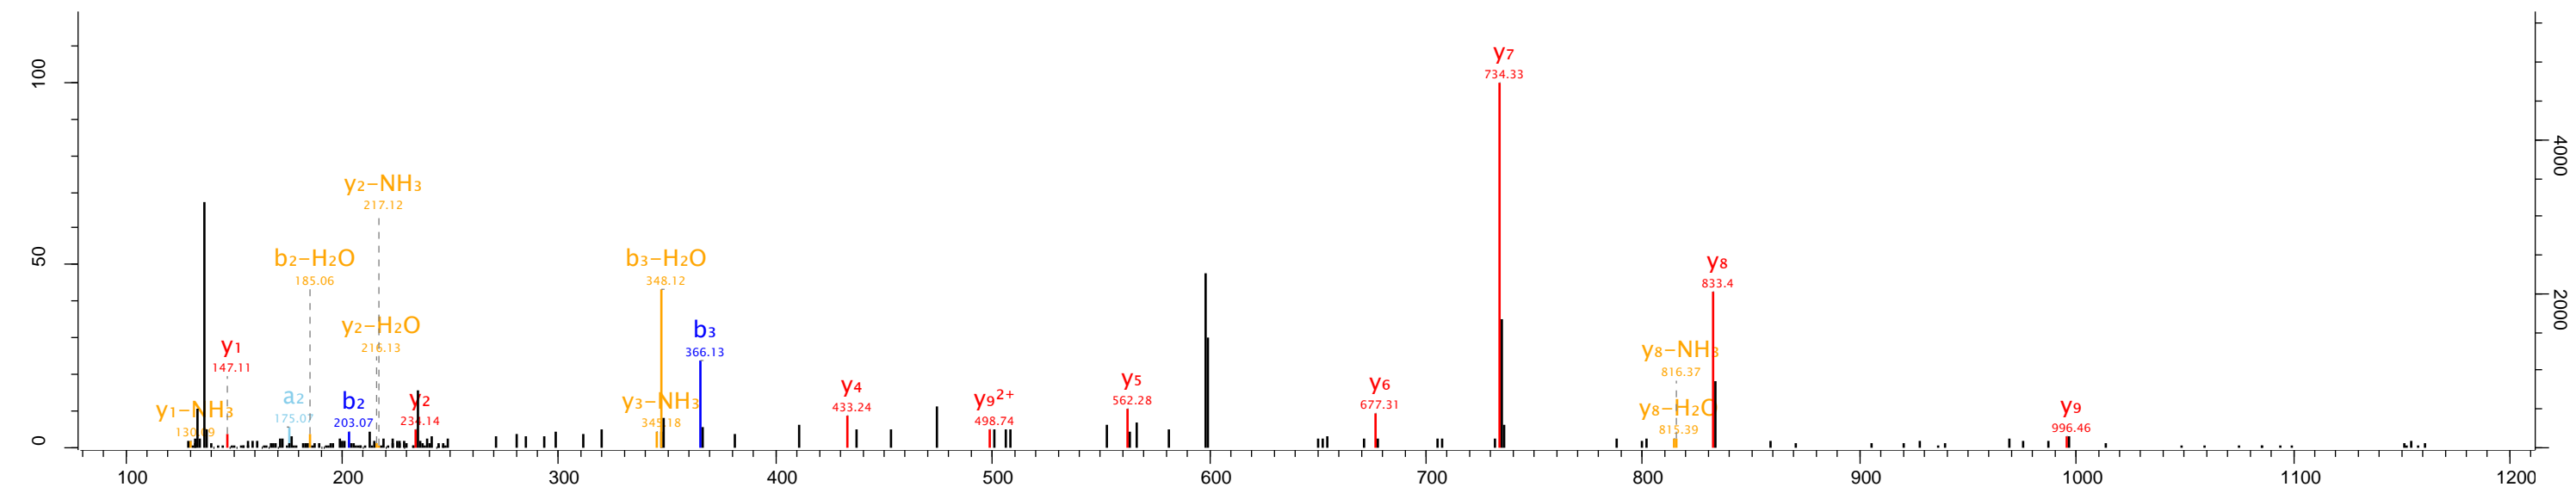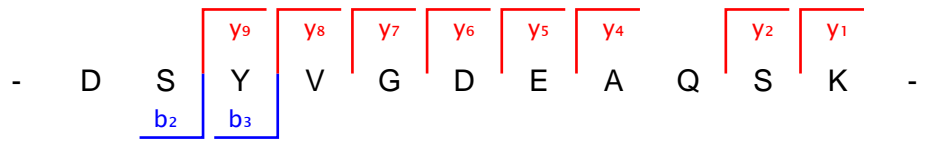

Spectral Annotation for Single-Peptide IDs between Single D11 Cells using Q-OT-LIT

Raw file: 2015-01-08\_CL03\_Blastomere-15  
 Scan: 36972 Method: ITMS; HCD Score: 86.7 m/z: 710.87

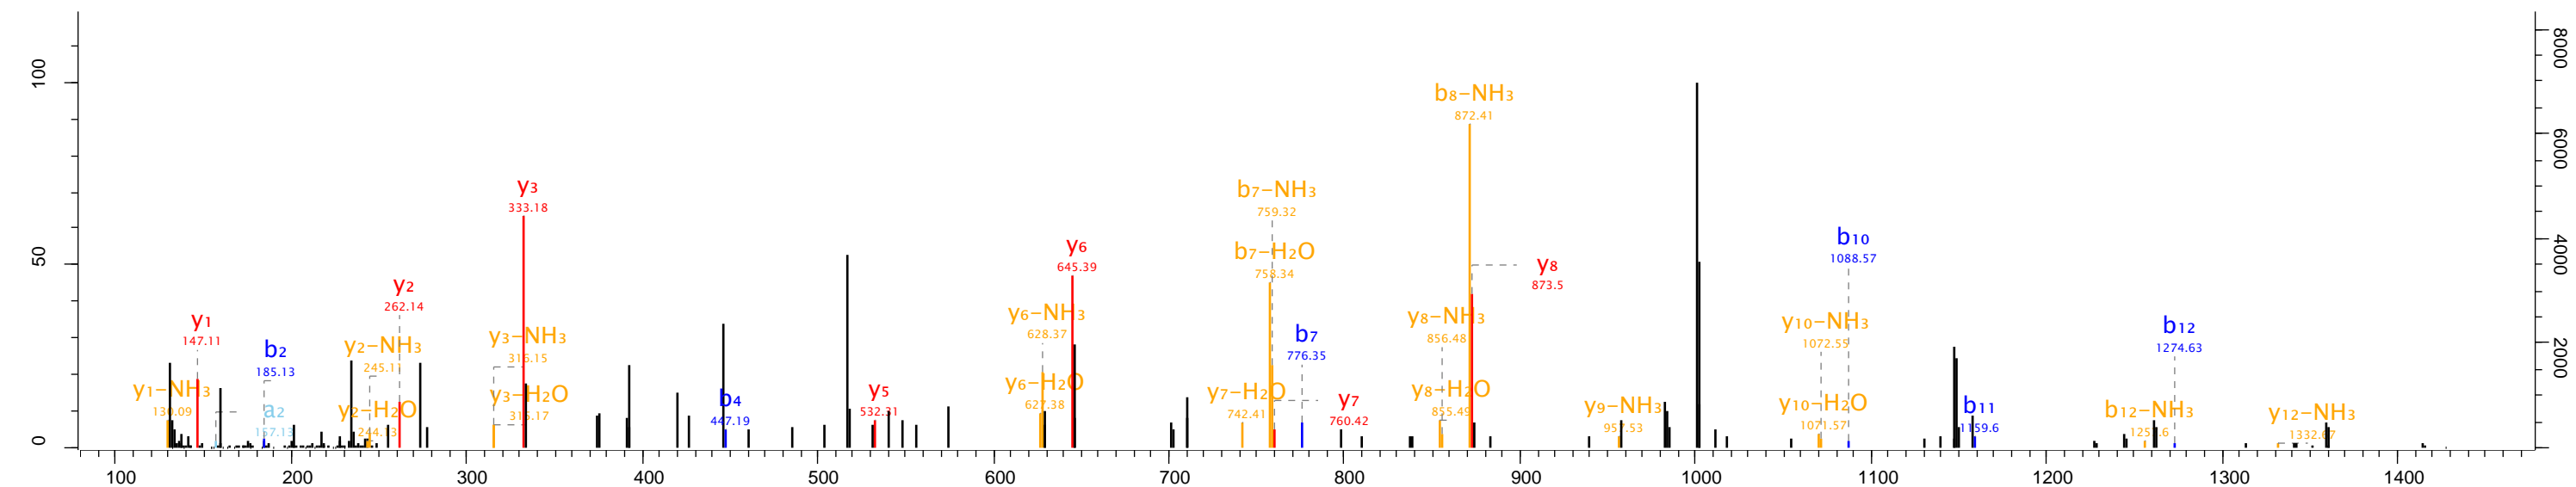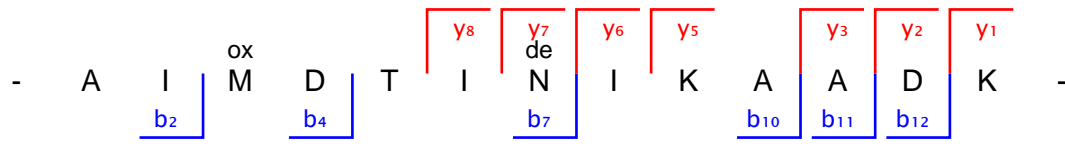

Spectral Annotation for Single-Peptide IDs between Single D11 Cells using Q-OT-LIT



Raw file 2015-01-08\_CL03\_Blastomere-15 Scan 37035 Method ITMS; HCD Score 55.29 m/z 710.87

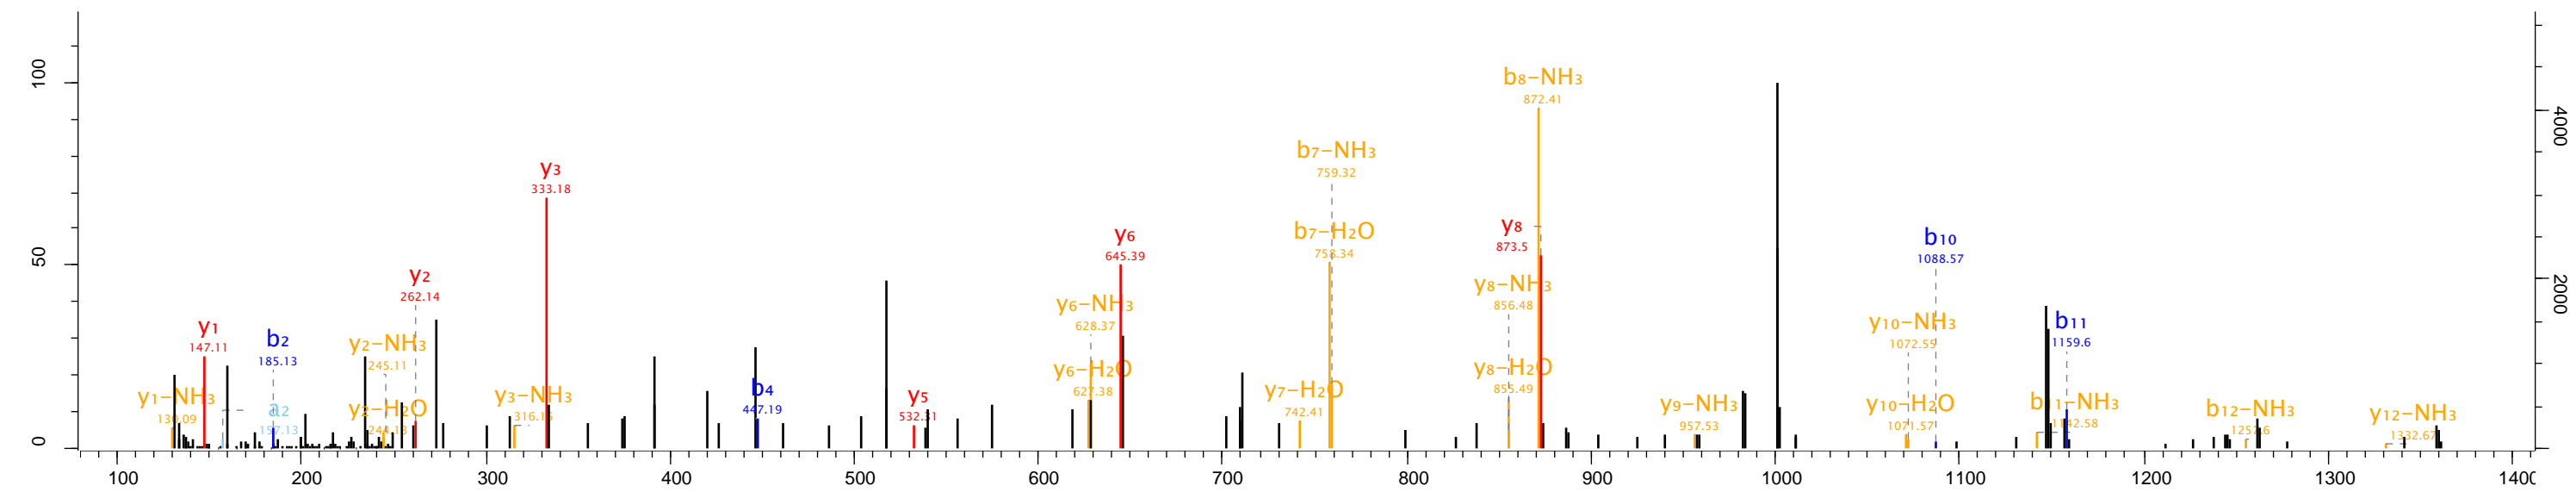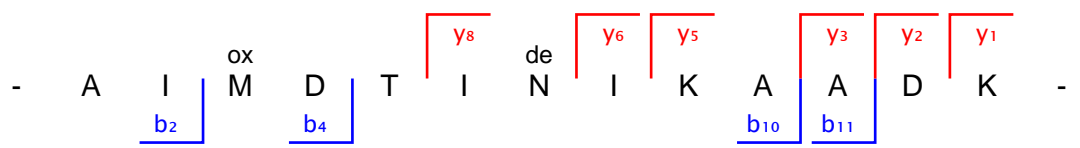

Spectral Annotation for Single-Peptide IDs between Single D11 Cells using Q-OT-LIT

Raw file: 2015-01-08\_CL03\_Blastomere-15  
 Scan: 37051 Method: ITMS; HCD Score: 60.26 m/z: 668.35

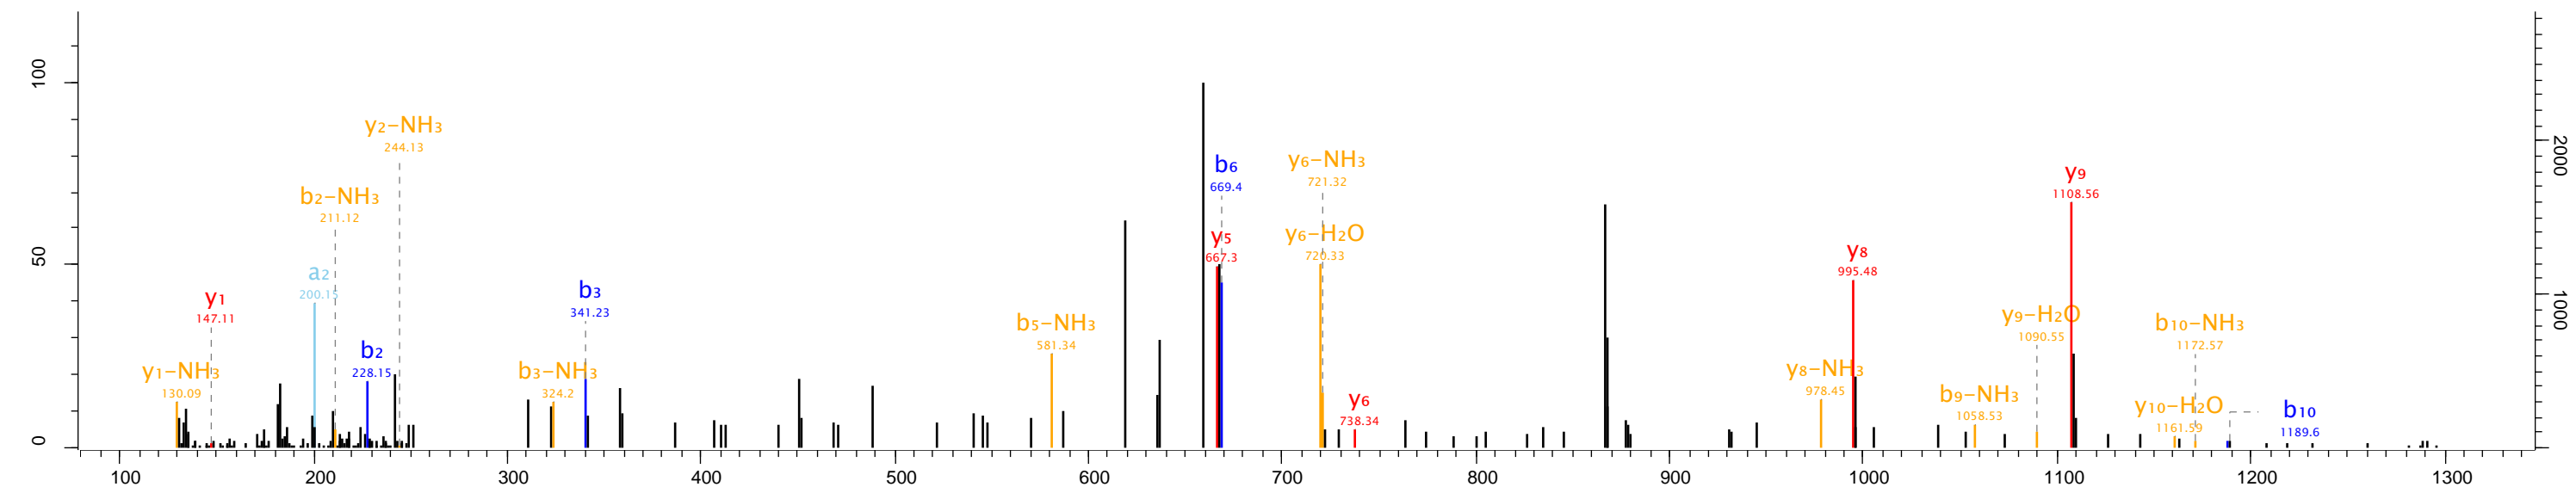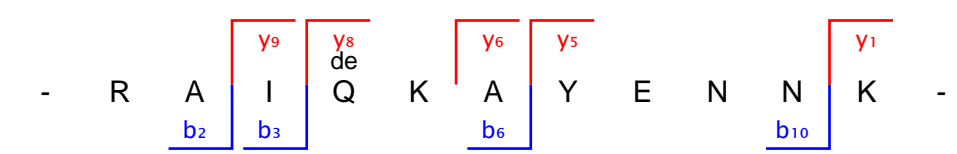

Spectral Annotation for Single-Peptide IDs between Single D11 Cells using Q-OT-LIT

Raw file 2015-01-08\_CL03\_Blastomere-15 Scan 37093 Method ITMS; HCD Score 67.02 m/z 710.87

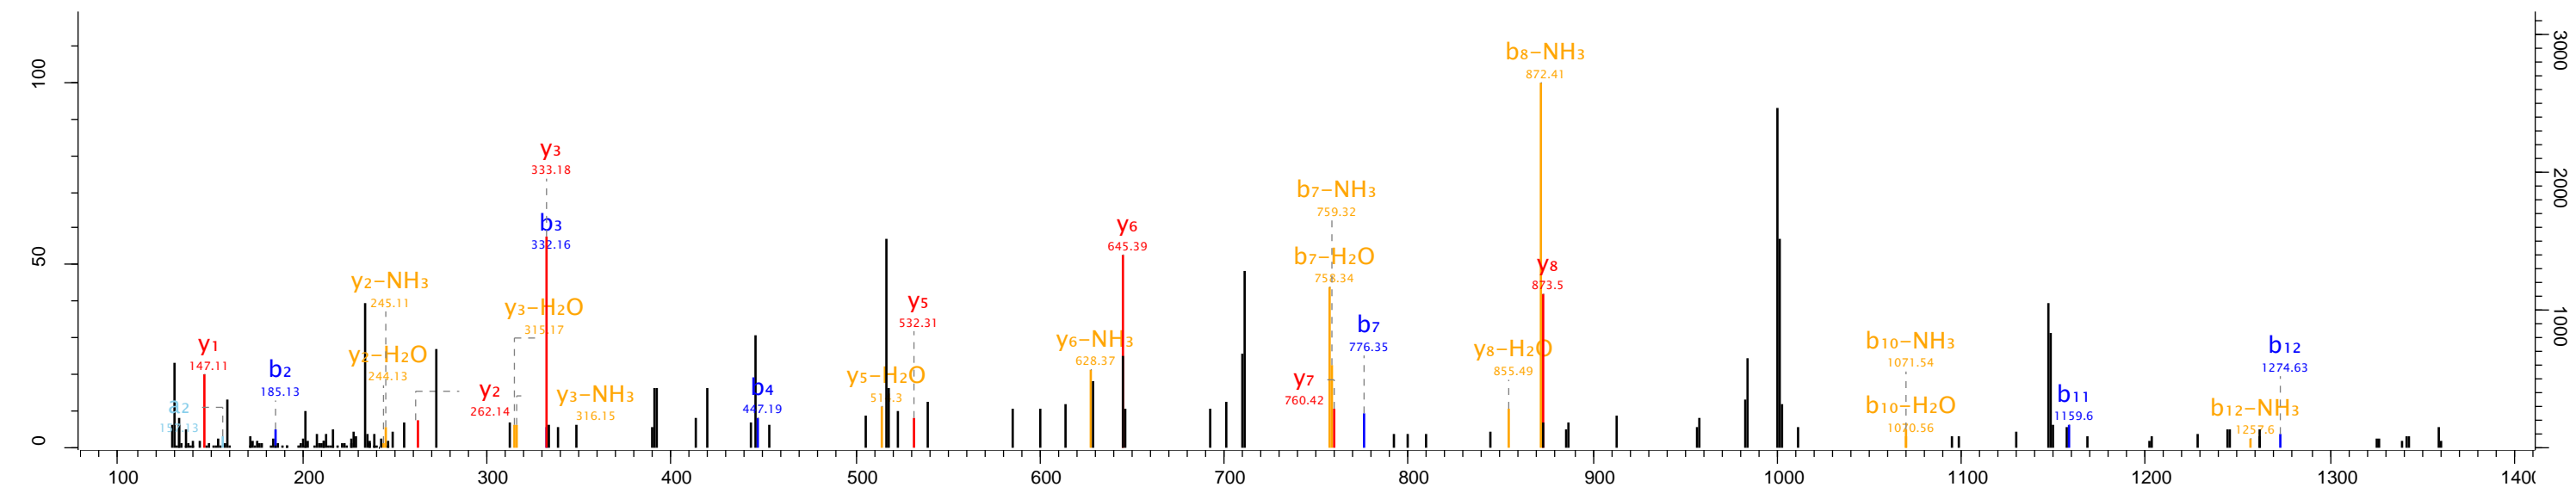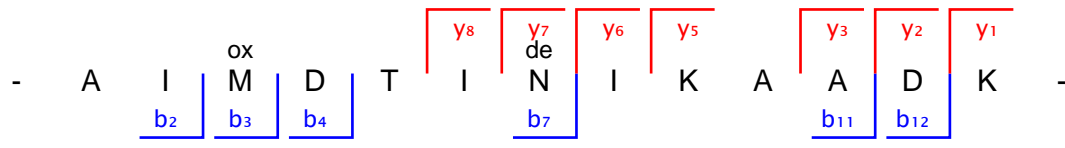

Spectral Annotation for Single-Peptide IDs between Single D11 Cells using Q-OT-LIT

Raw file 2015-01-08\_CL03\_Blastomere-15 Scan 37109 Method ITMS; HCD Score 52.17 m/z 674.8

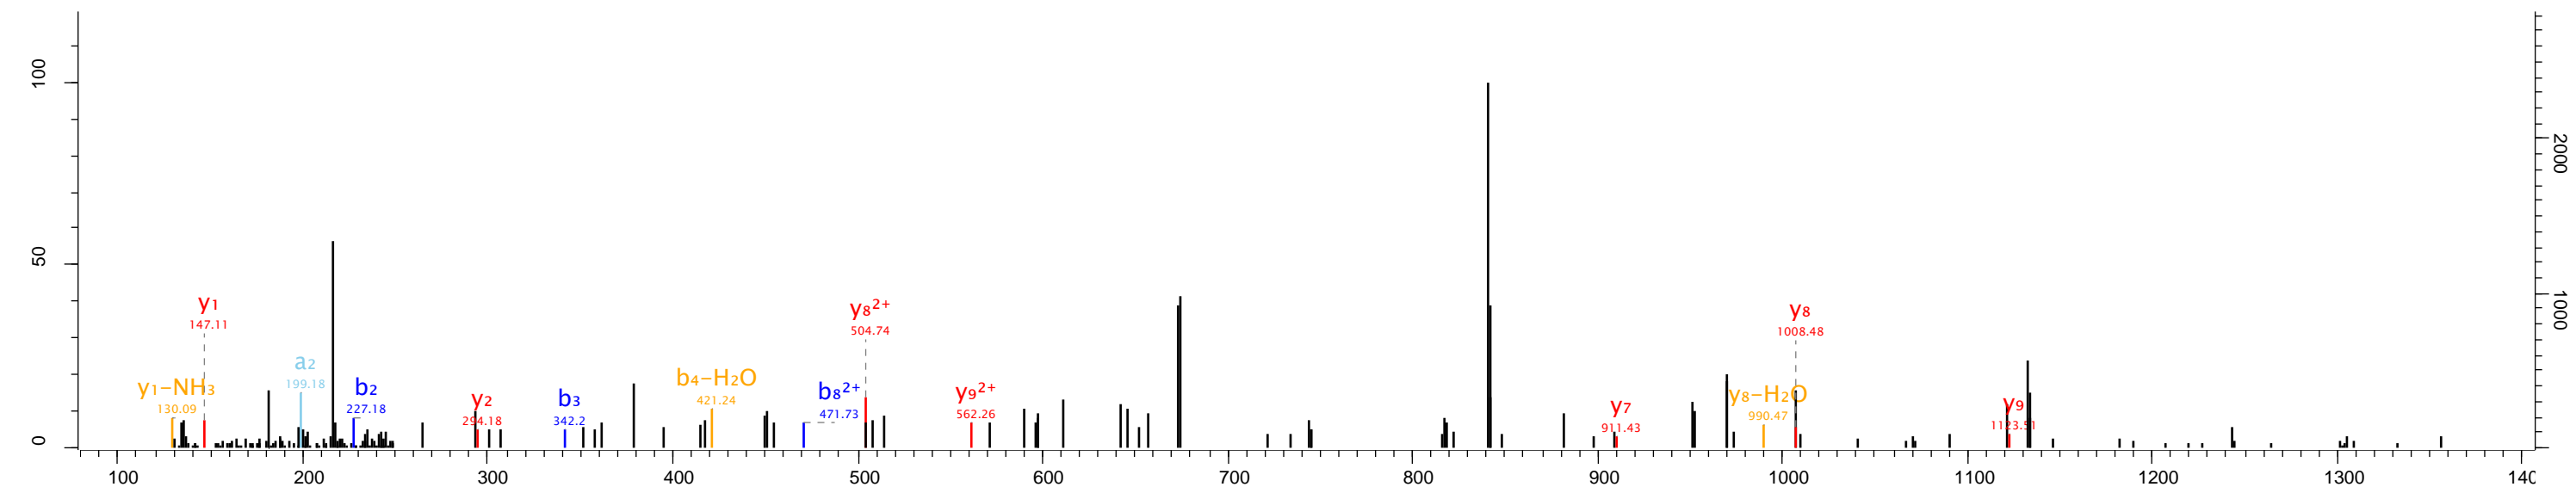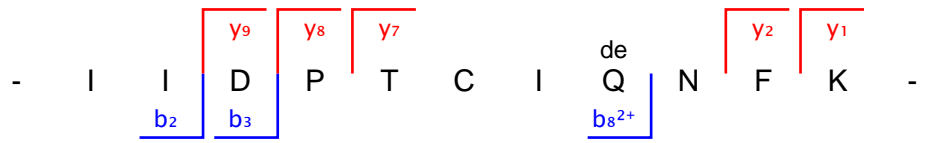

Spectral Annotation for Single-Peptide IDs between Single D11 Cells using Q-OT-LIT

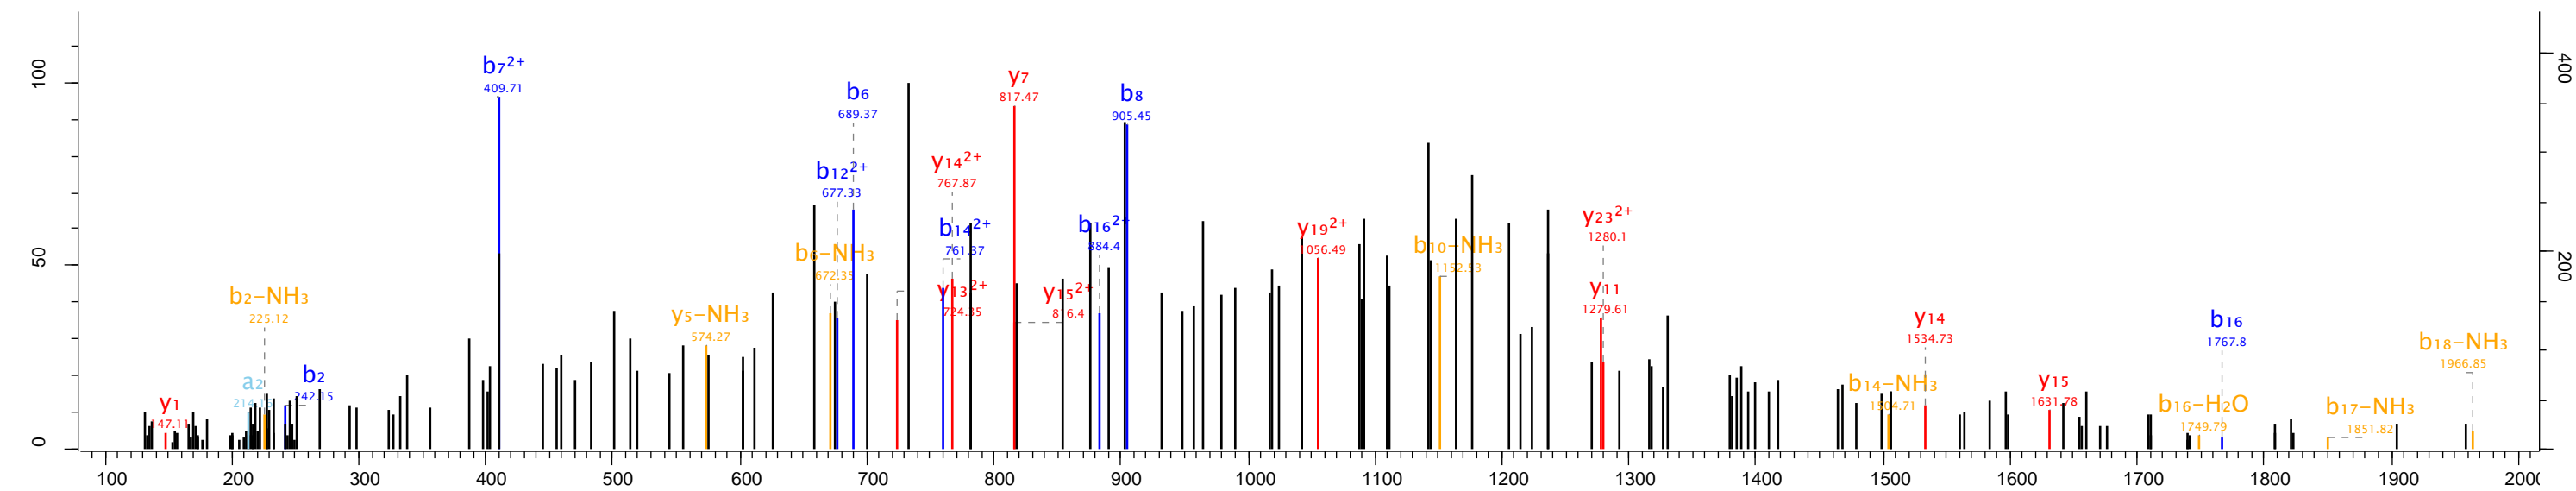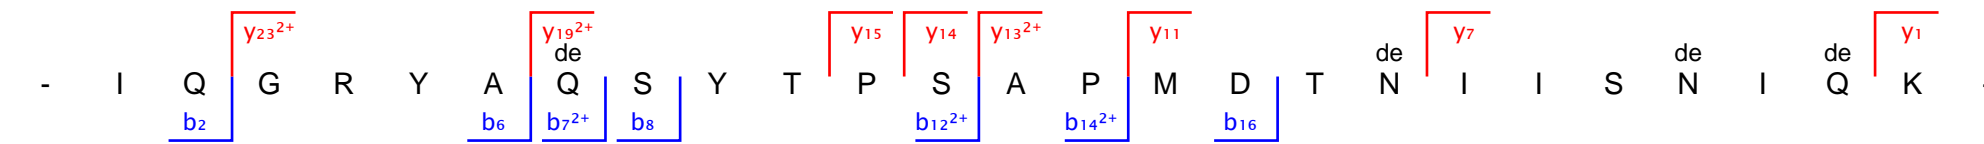

Raw file 2015-01-08\_CL03\_Blastomere-15 Scan 37680 Method ITMS; HCD Score 98.3 m/z 840.13

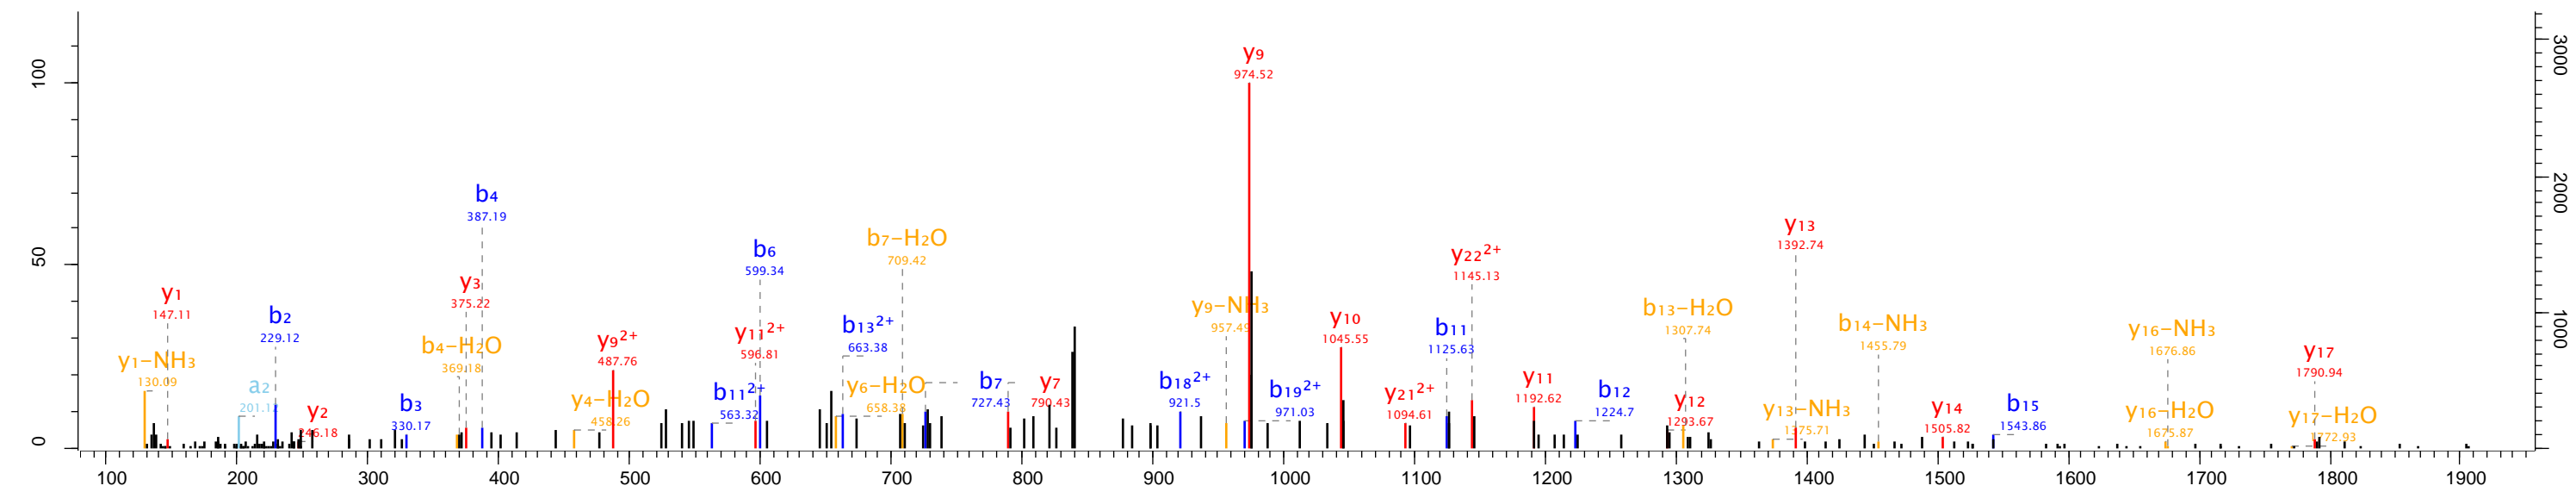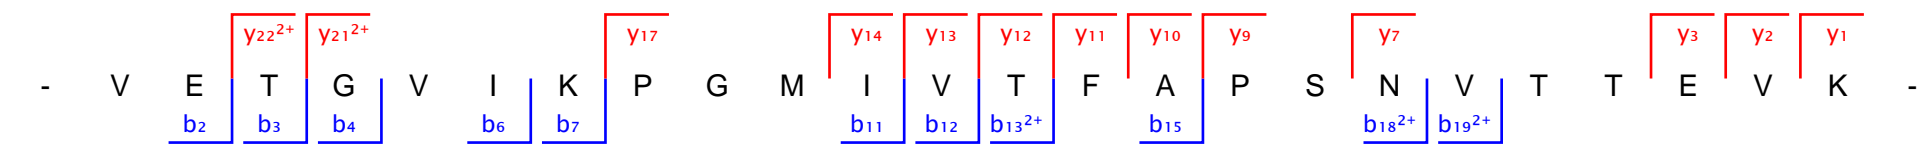

Spectral Annotation for Single-Peptide IDs between Single D11 Cells using Q-OT-LIT

Raw file 2015-01-08\_CL03\_Blastomere-15 Scan 38012 Method ITMS; HCD Score 67.95 m/z 717.37

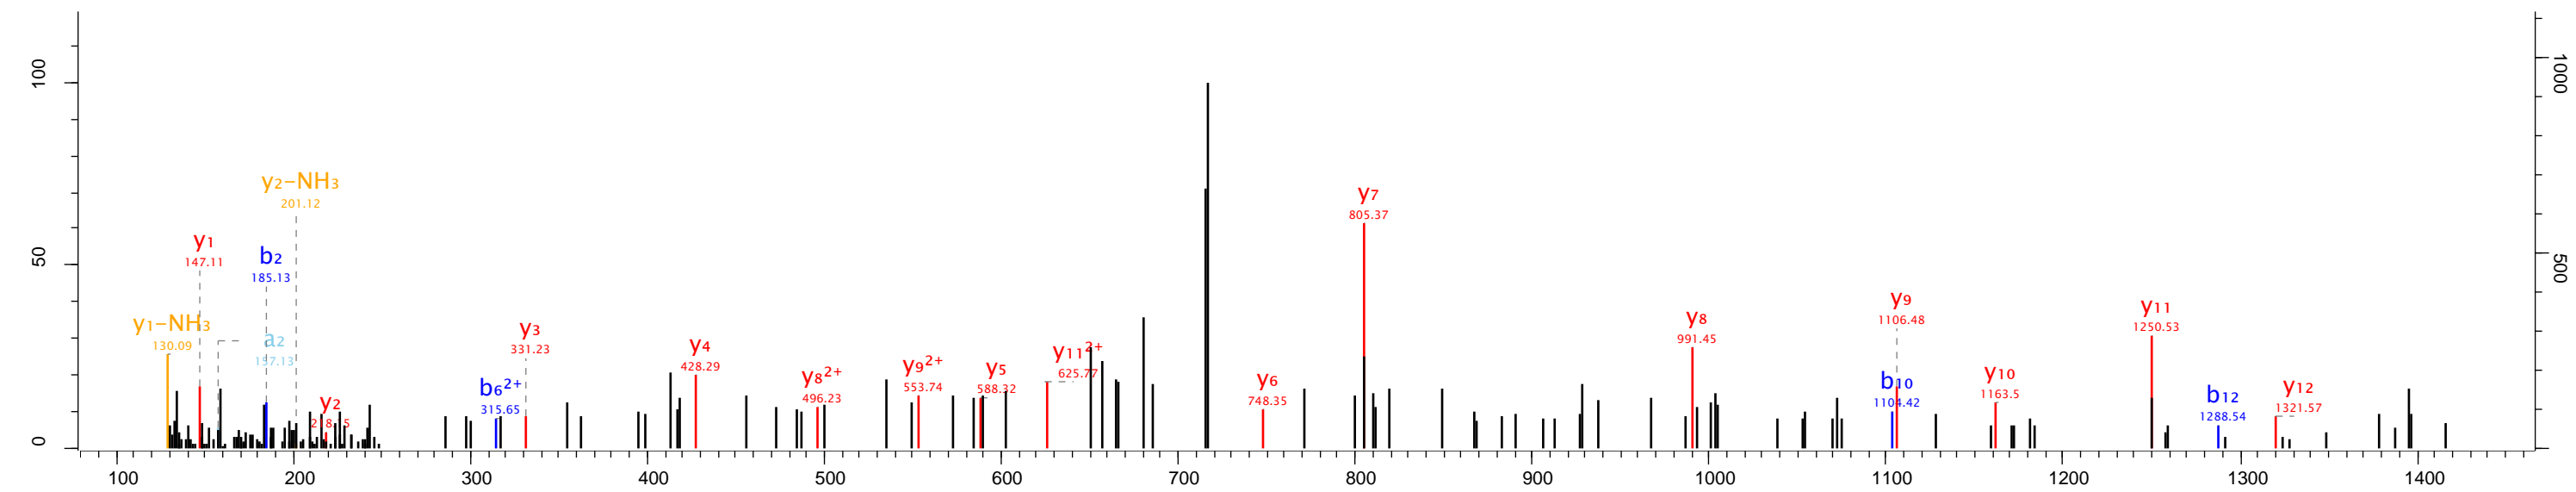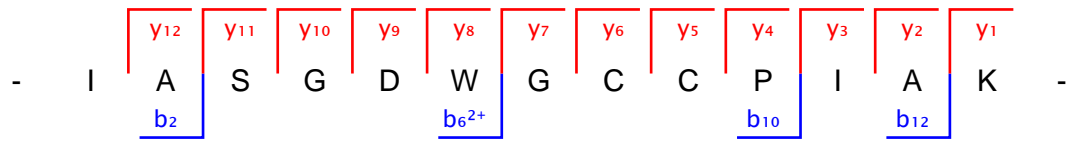

Spectral Annotation for Single-Peptide IDs between Single D11 Cells using Q-OT-LIT

Raw file 2015-01-08\_CL03\_Blastomere-15 Scan 38124 Method ITMS; HCD Score 63.19 m/z 666.85

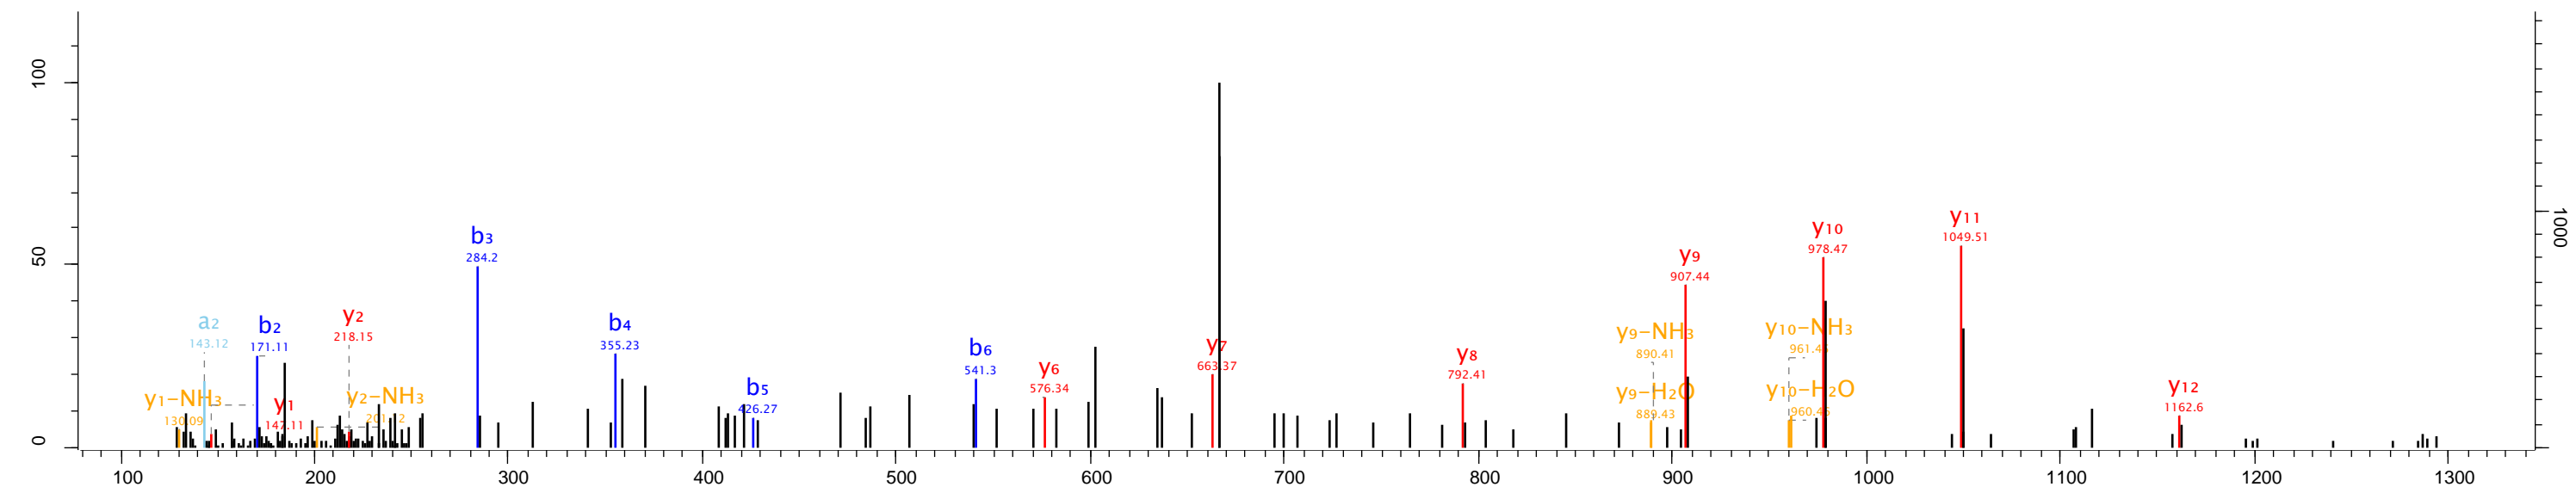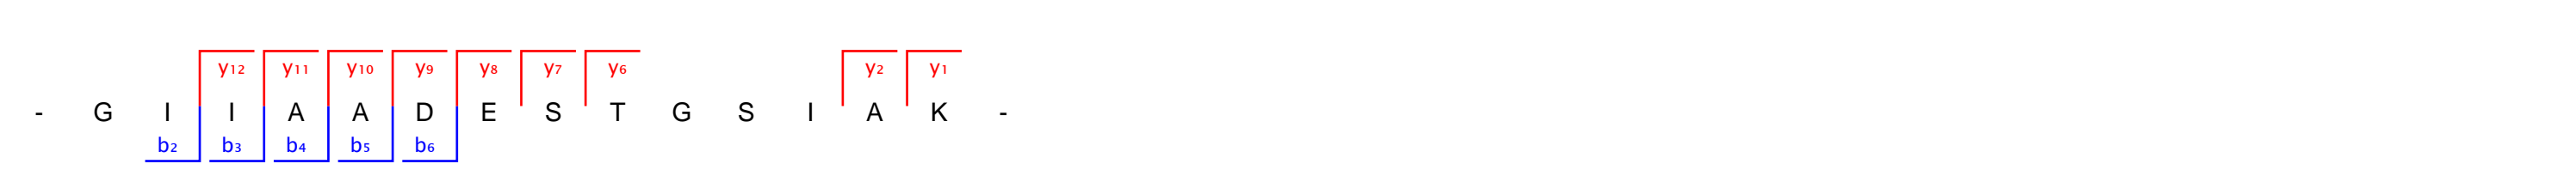



Raw file 2015-01-08\_CL03\_Blastomere-15 Scan 38184 Method ITMS; HCD Score 117.93 m/z 672.87

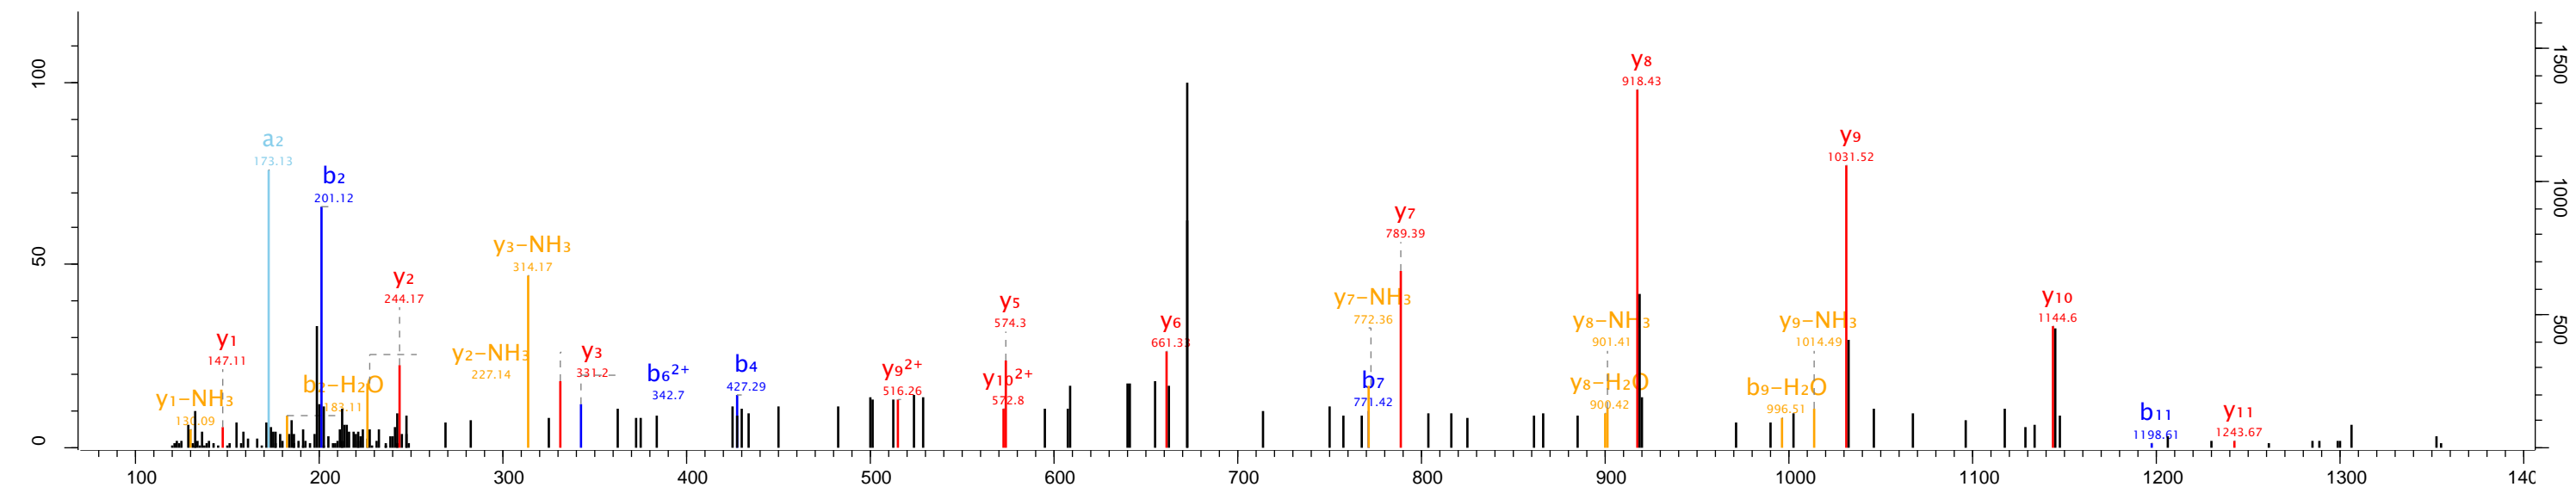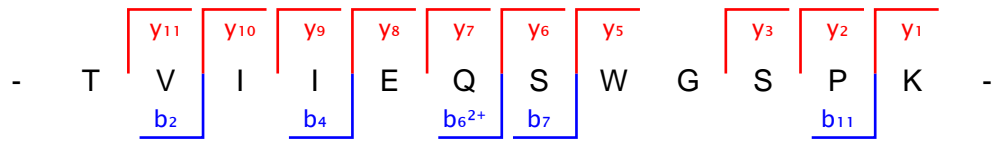

Spectral Annotation for Single-Peptide IDs between Single D11 Cells using Q-OT-LIT

Raw file 2015-01-08\_CL03\_Blastomere-15 Scan 38204 Method ITMS; HCD Score 92.86 m/z 672.86

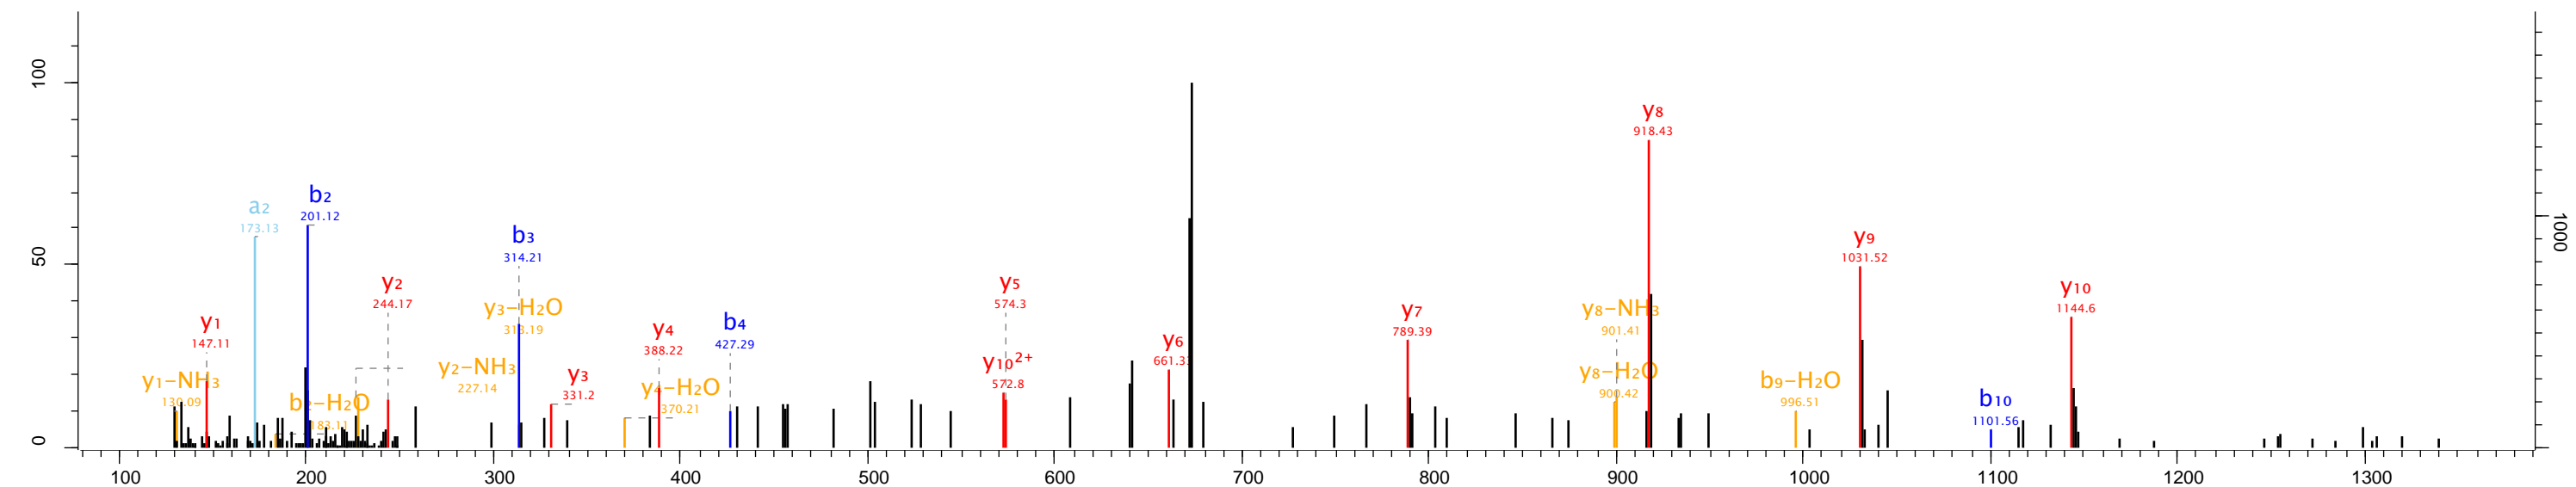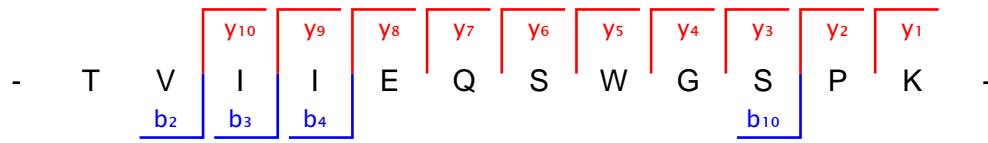

Spectral Annotation for Single-Peptide IDs between Single D11 Cells using Q-OT-LIT

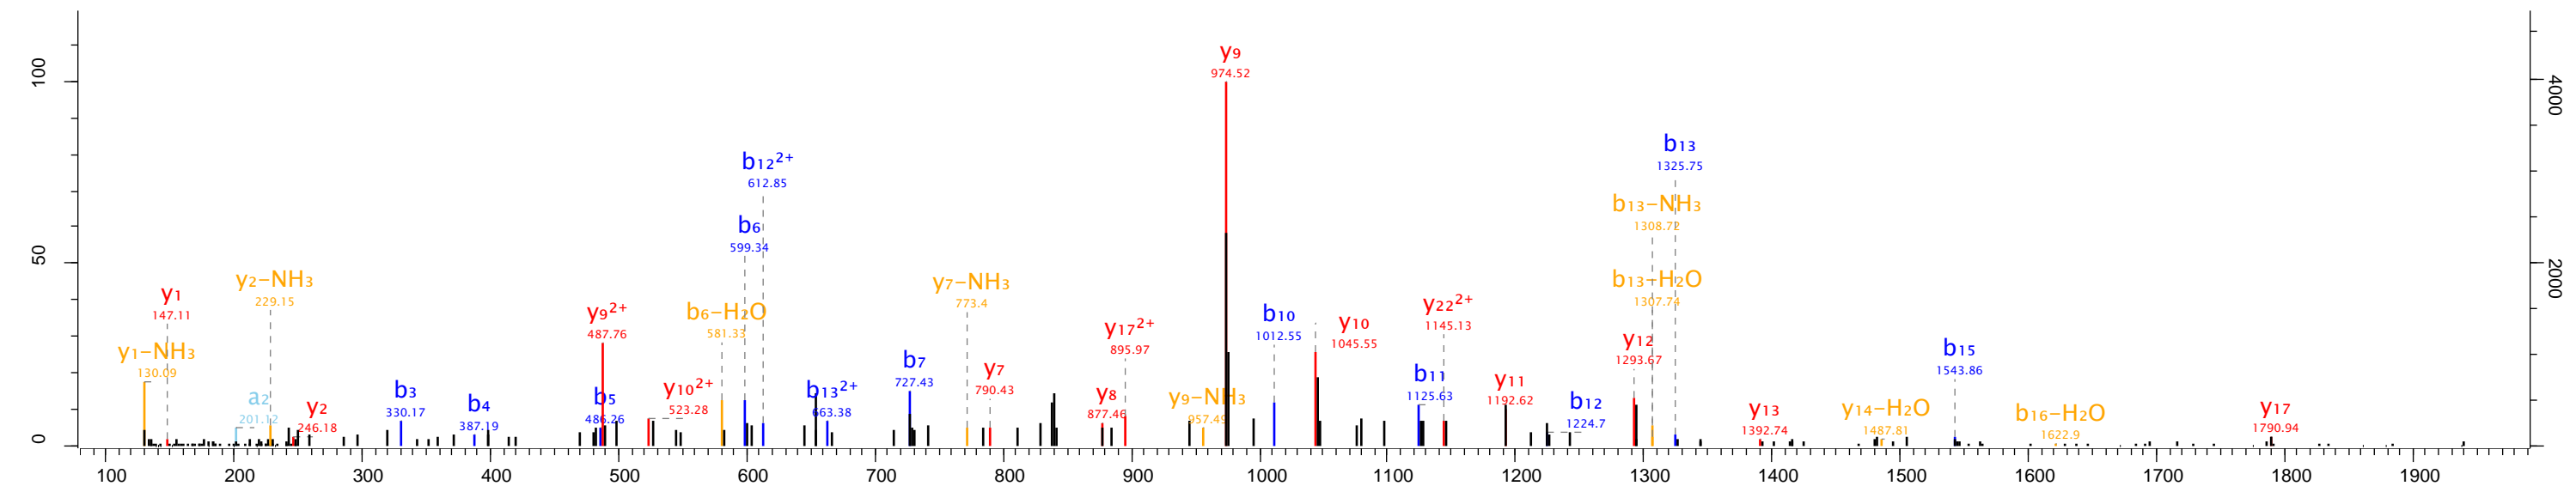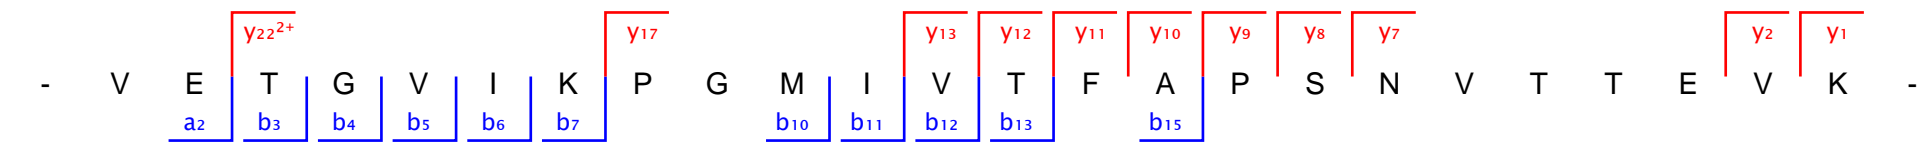

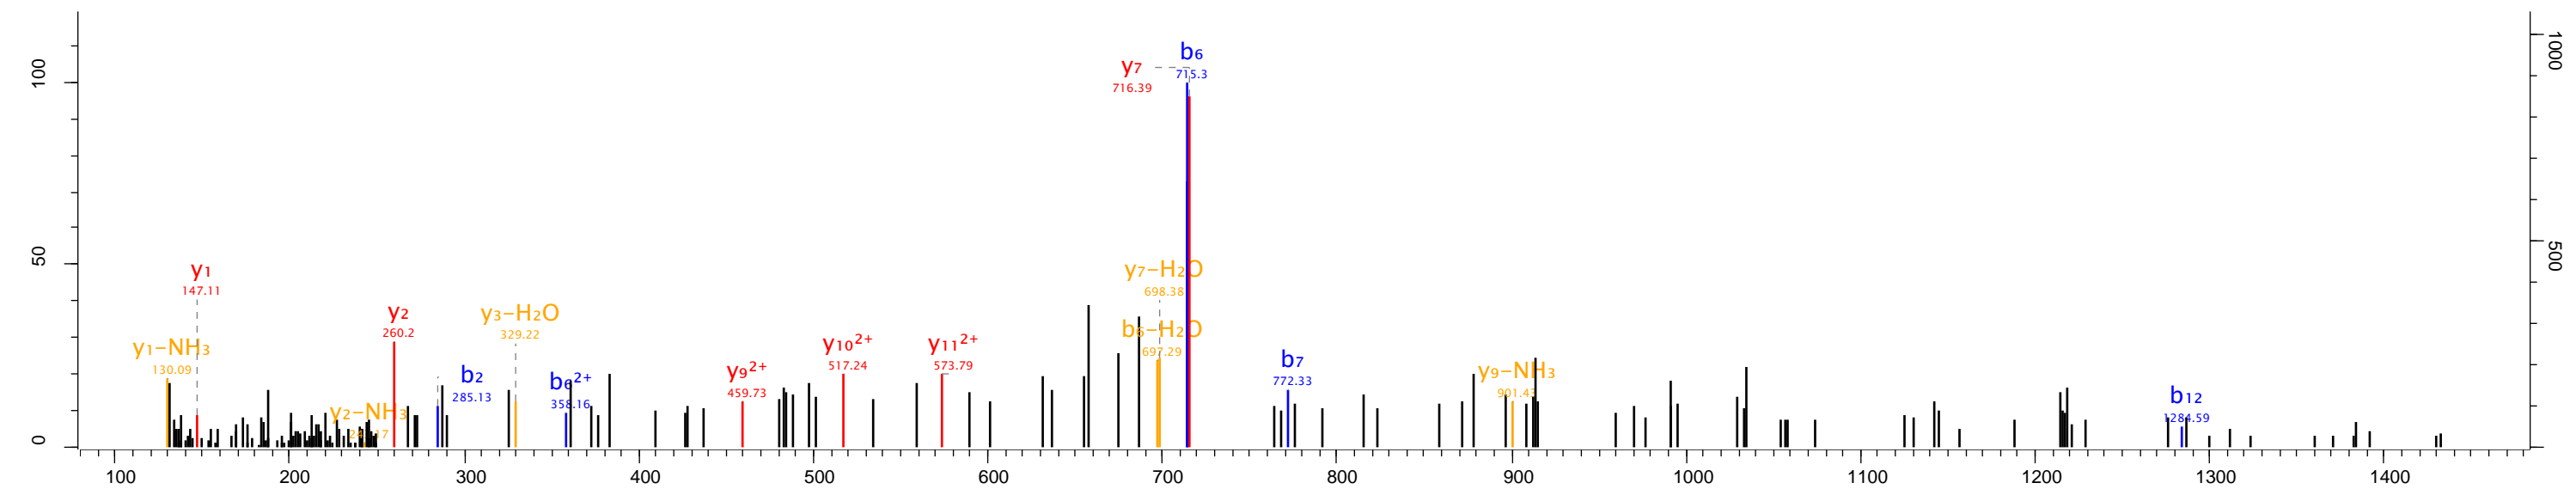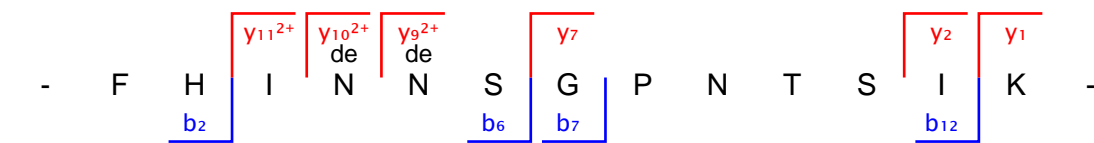

Raw file 2015-01-08\_CL03\_Blastomere-15 Scan 38309 Method ITMS; HCD Score 41.51 m/z 872.11

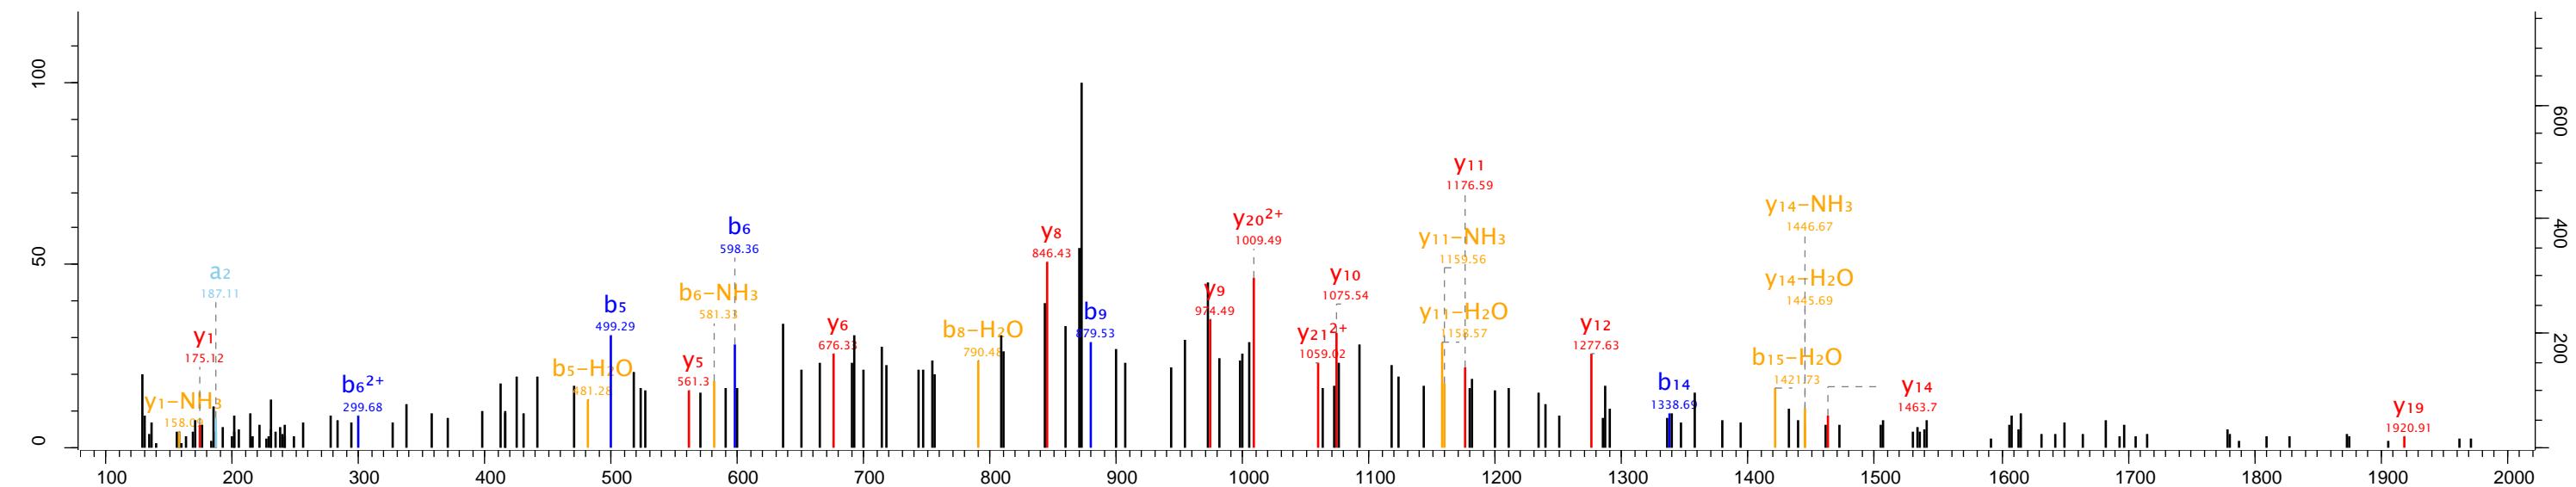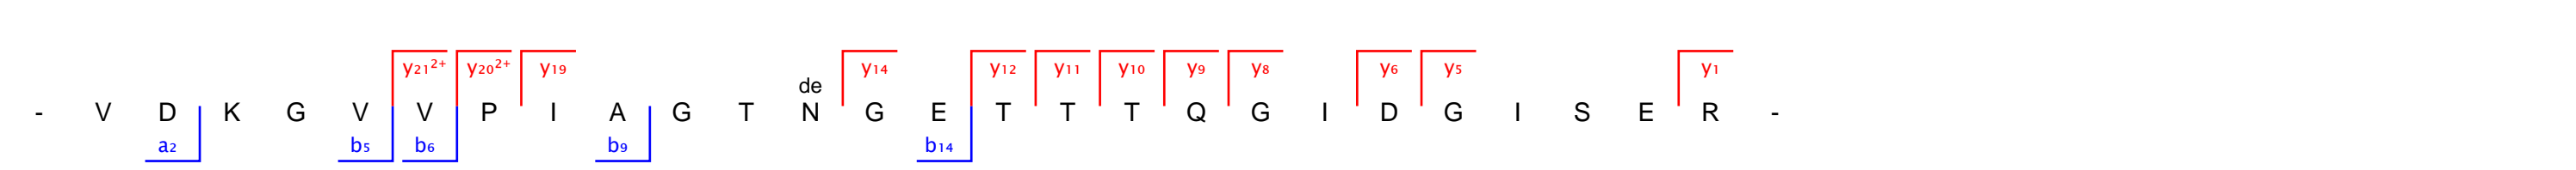

Spectral Annotation for Single-Peptide IDs between Single D11 Cells using Q-OT-LIT

Raw file 2015-01-08\_CL03\_Blastomere-15 Scan 38380 Method ITMS; HCD Score 44.1 m/z 857.79

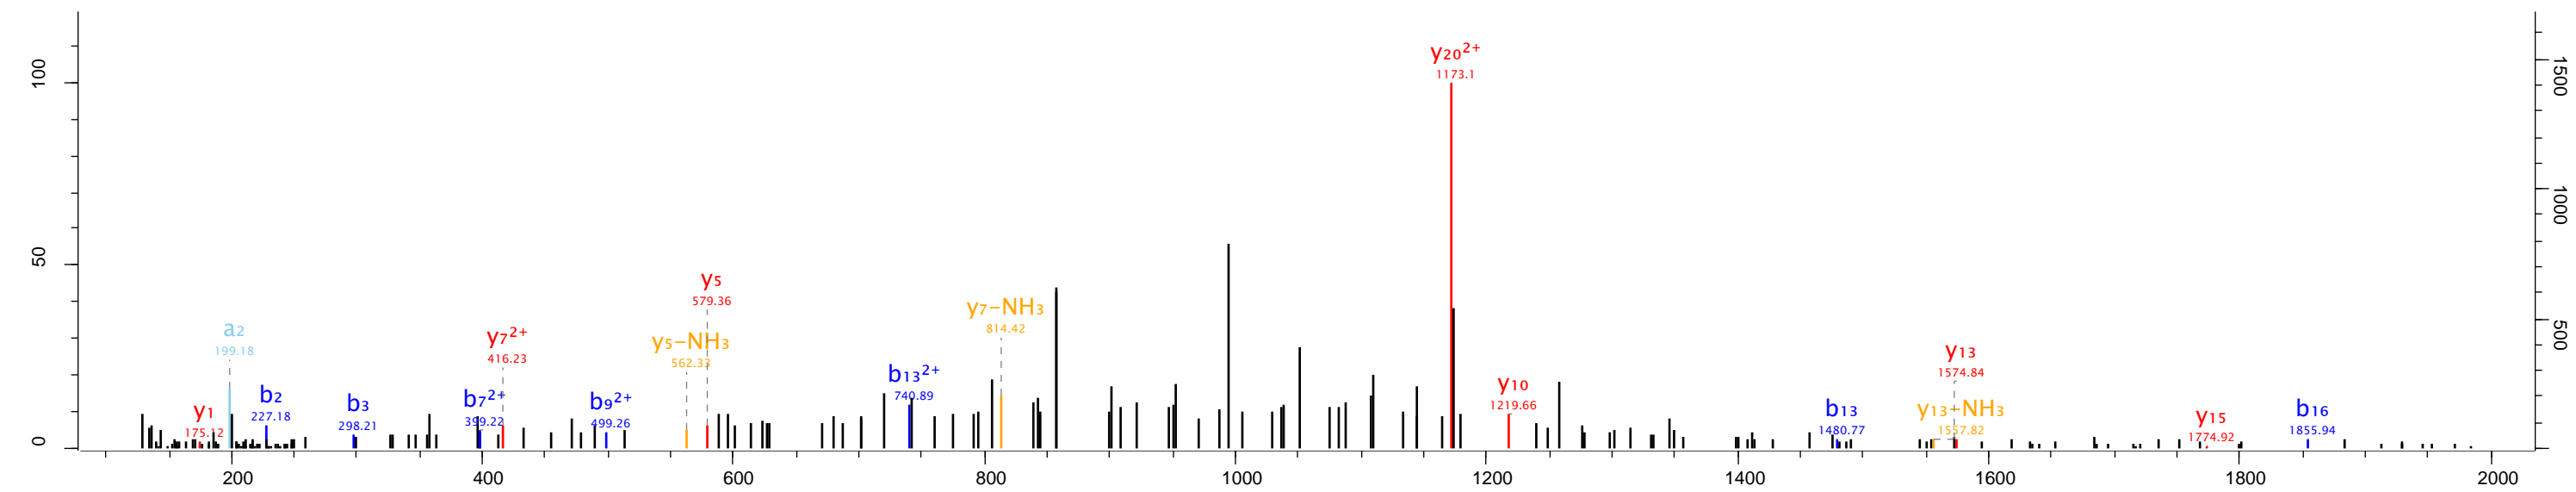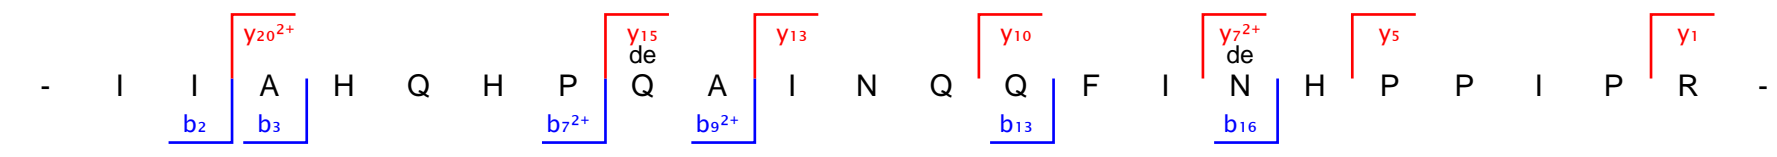

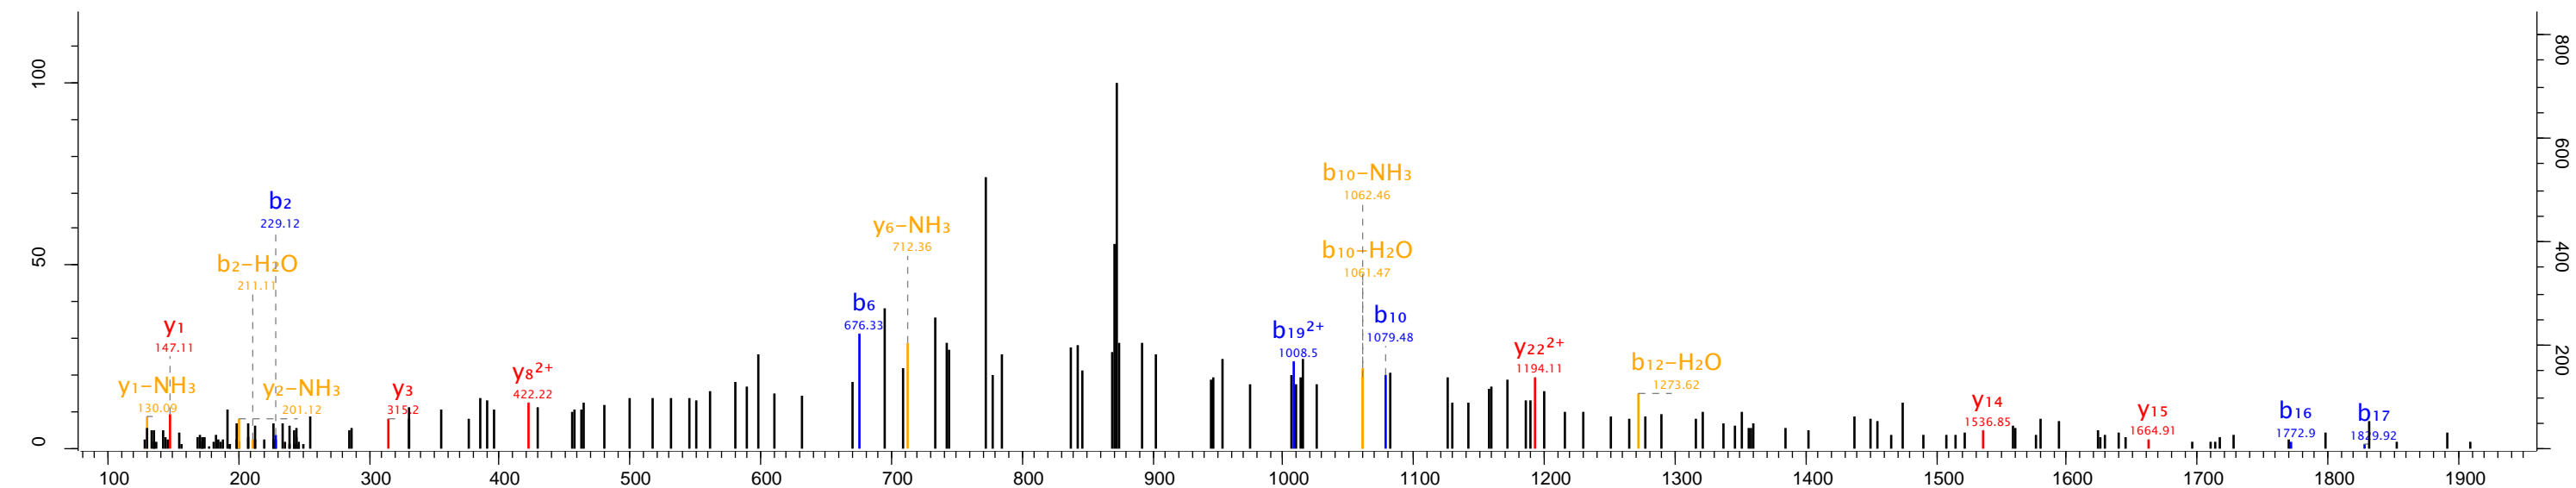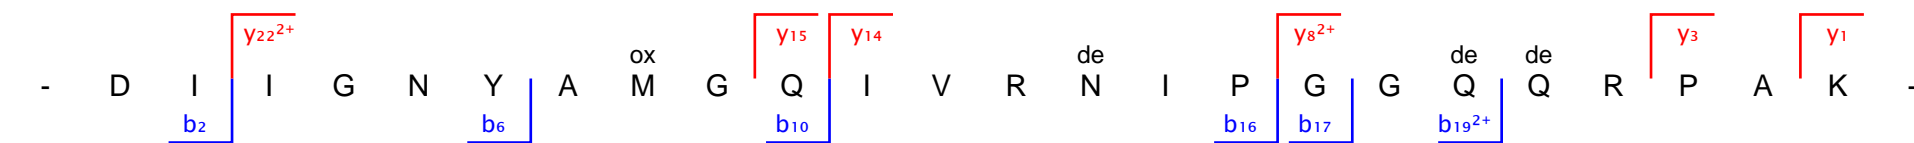

Raw file 2015-01-08\_CL03\_Blastomere-15 Scan 38517 Method ITMS; HCD Score 84.36 m/z 717.83

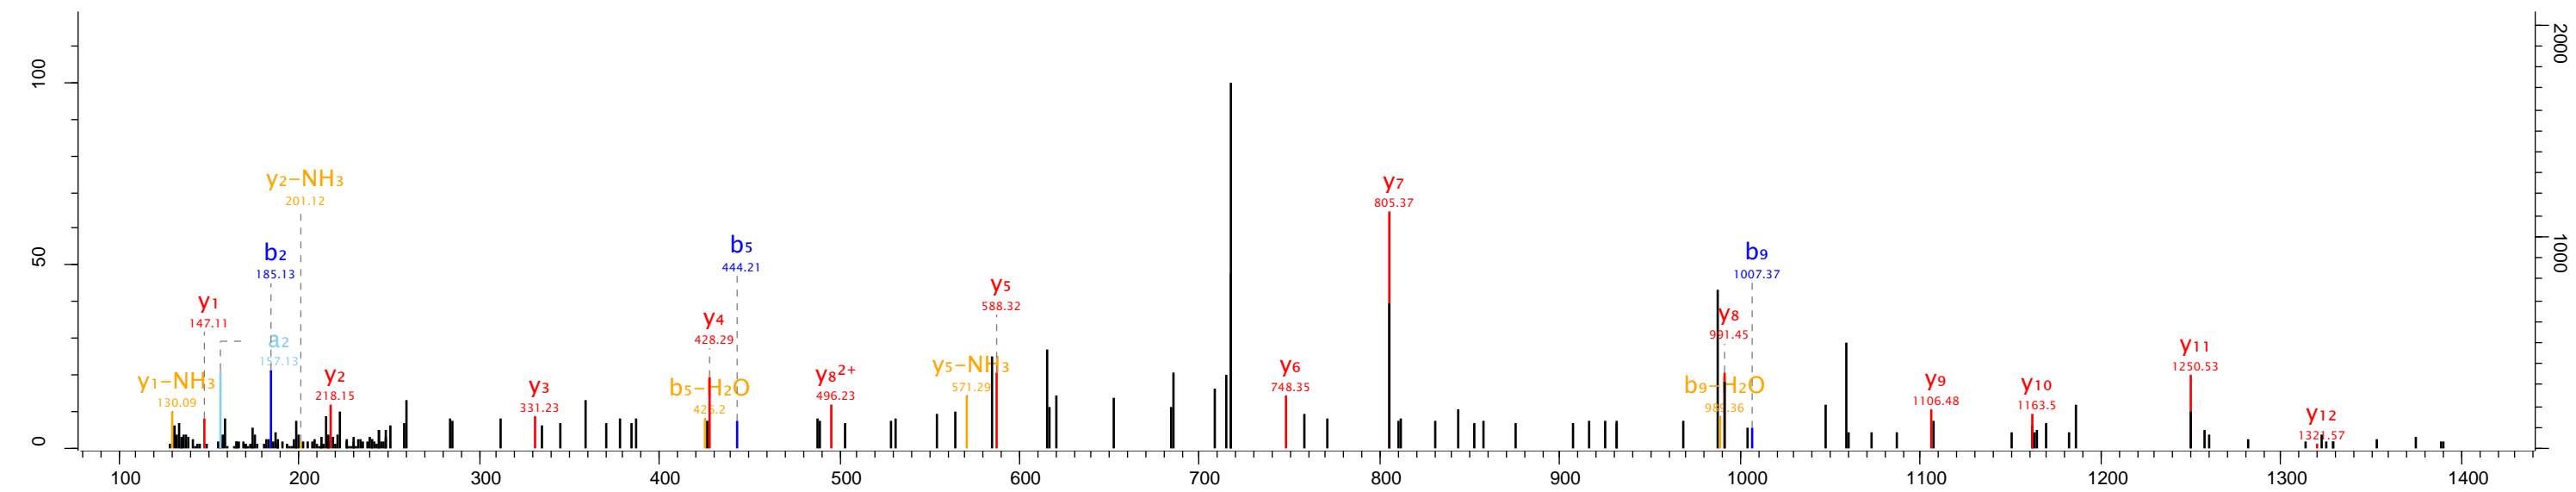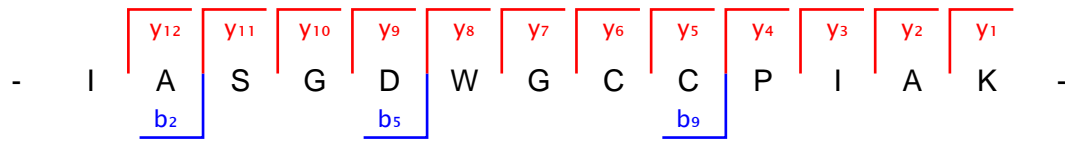

Spectral Annotation for Single-Peptide IDs between Single D11 Cells using Q-OT-LIT



Raw file 2015-01-08\_CL03\_Blastomere-15 Scan 38548 Method ITMS; HCD Score 45.13 m/z 919.8

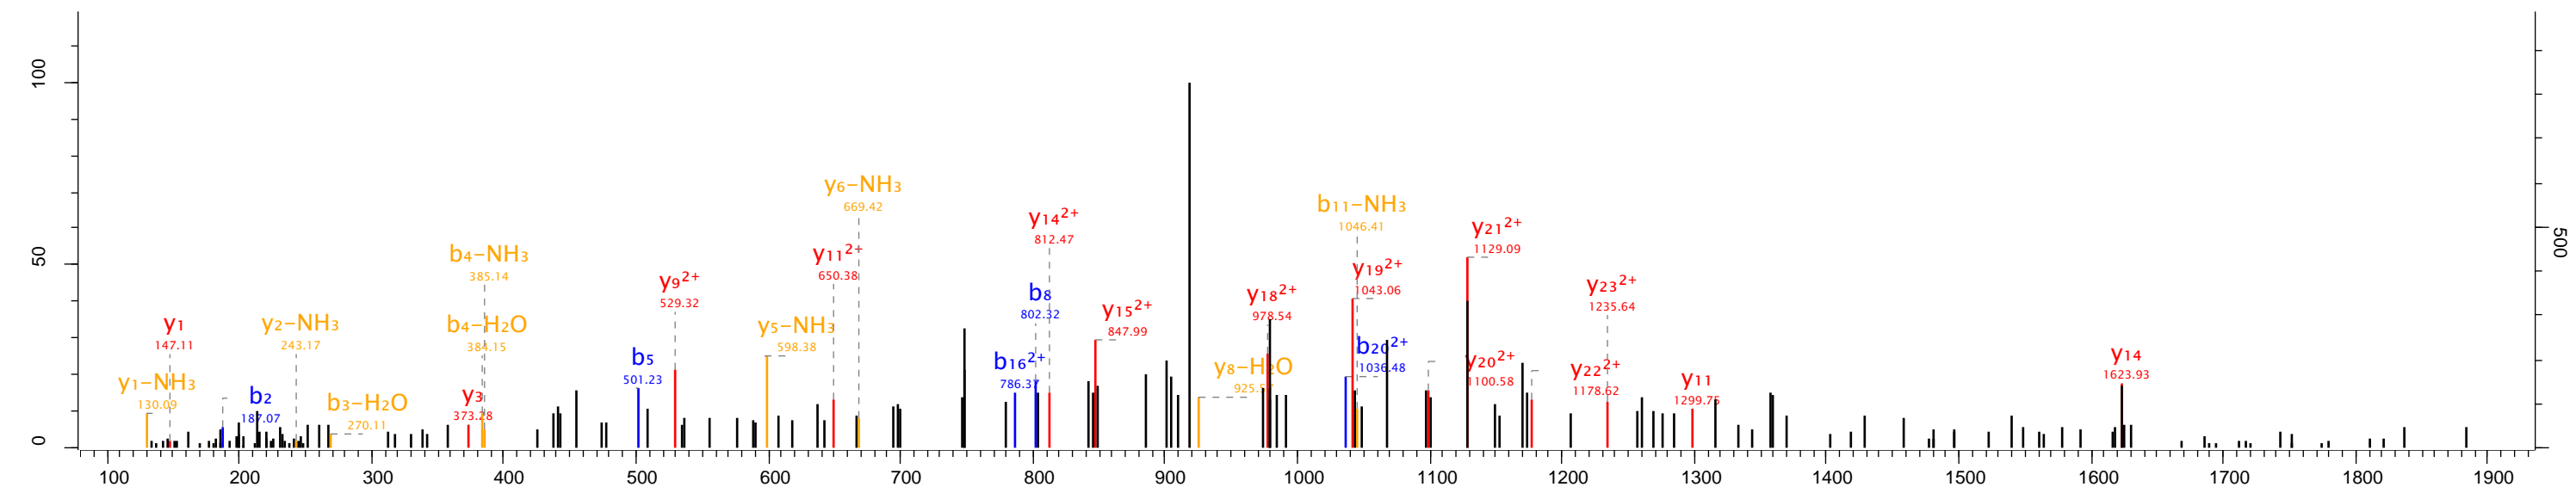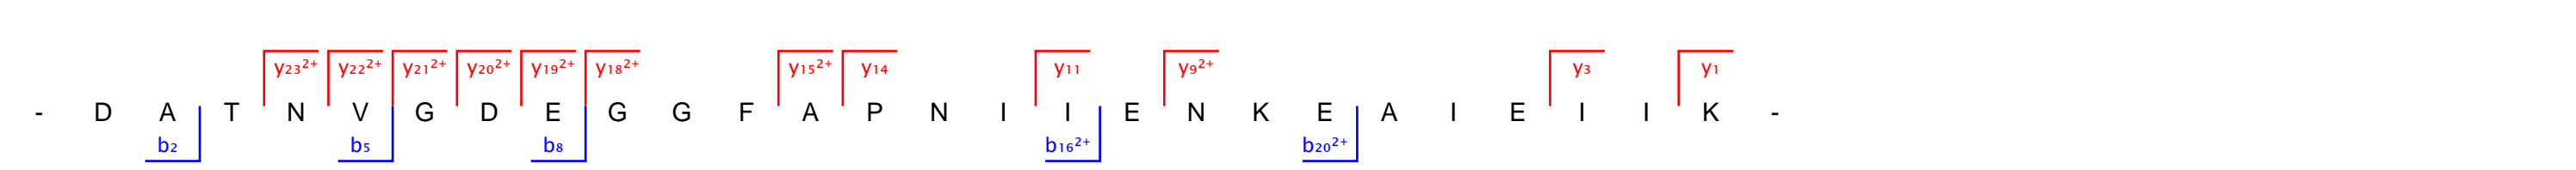

Spectral Annotation for Single-Peptide IDs between Single D11 Cells using Q-OT-LIT

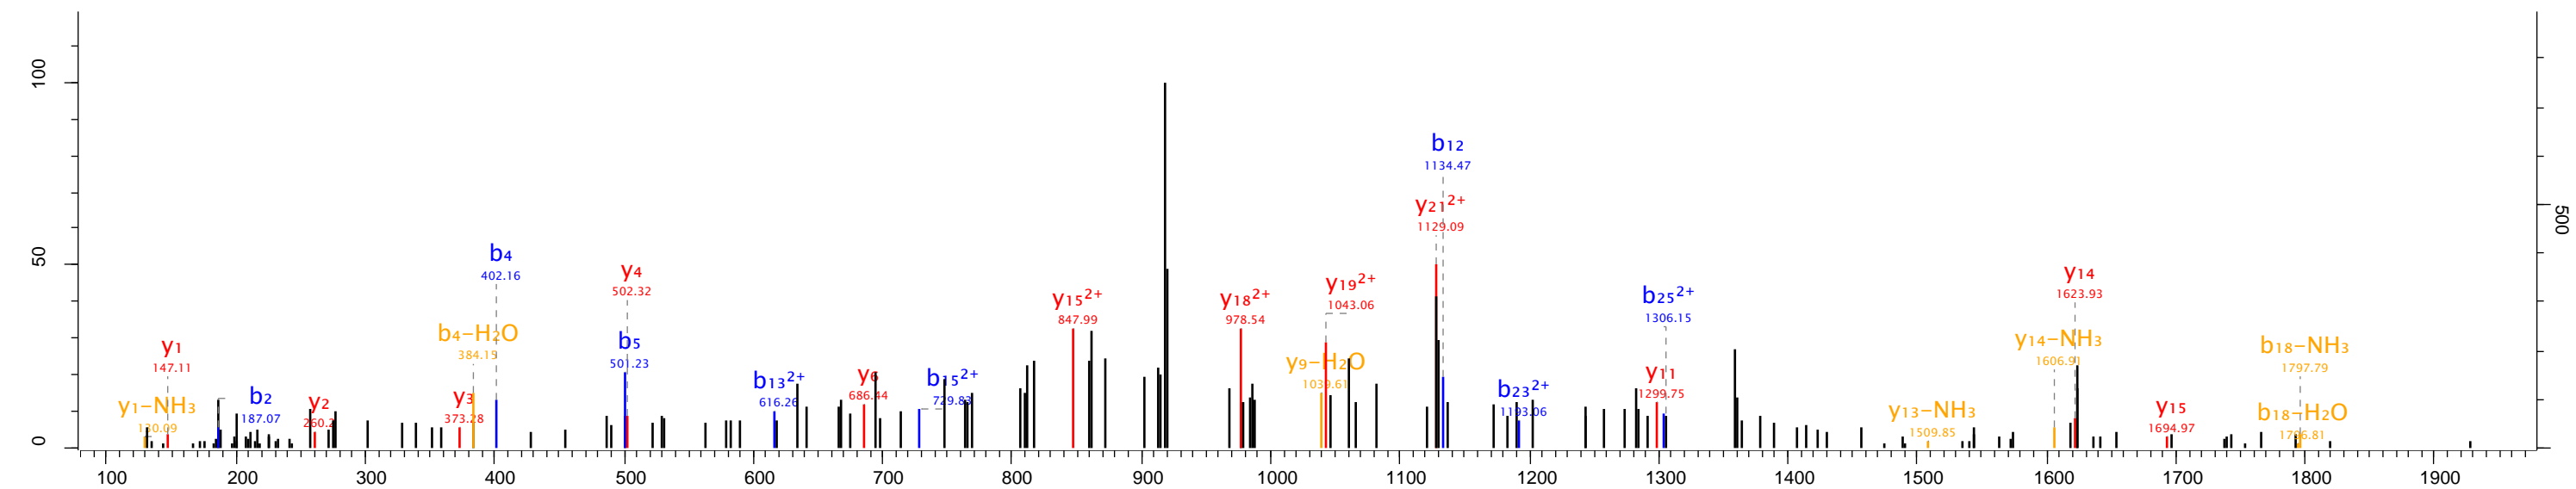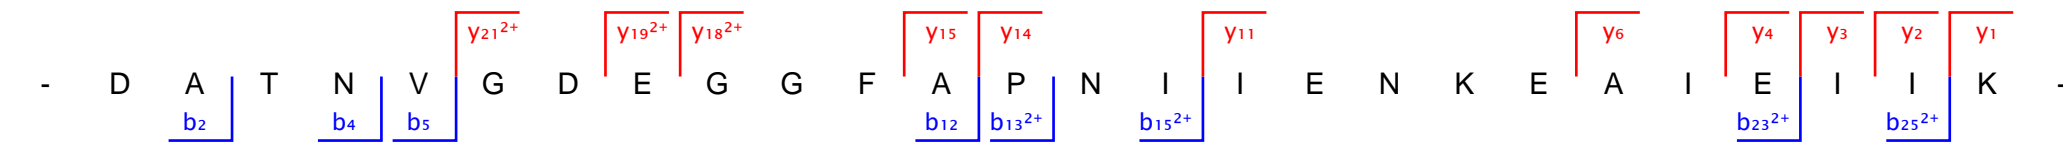

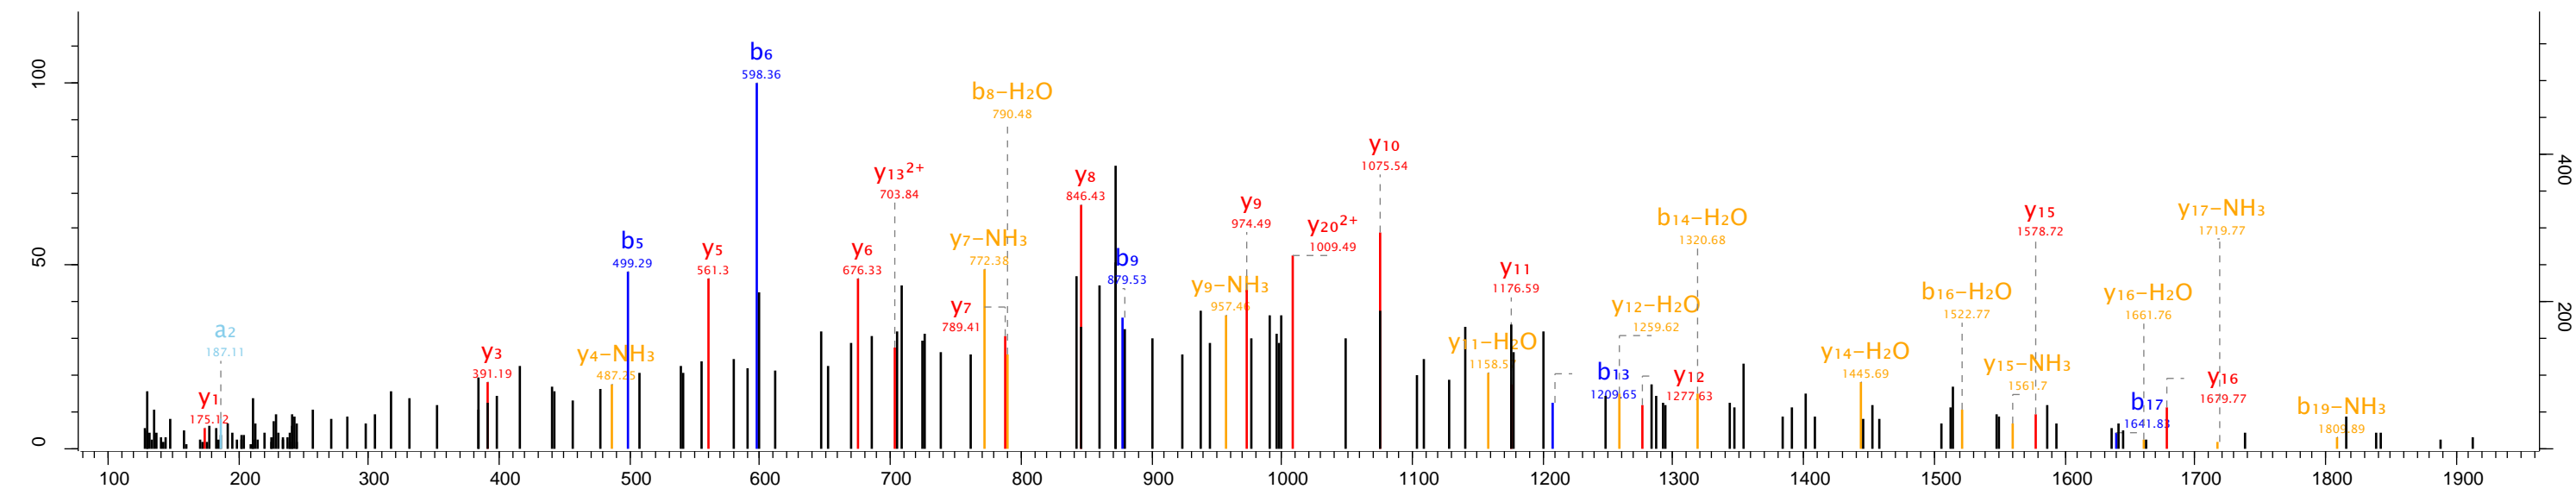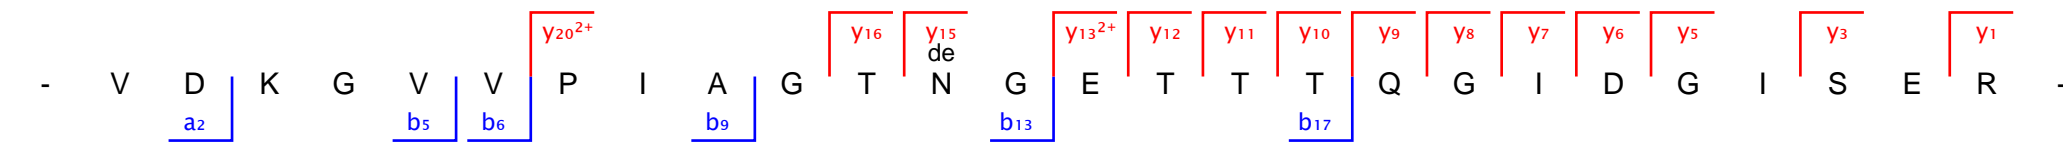

Raw file 2015-01-08\_CL03\_Blastomere-15 Scan 39160 Method ITMS; HCD Score 73.88 m/z 748.36

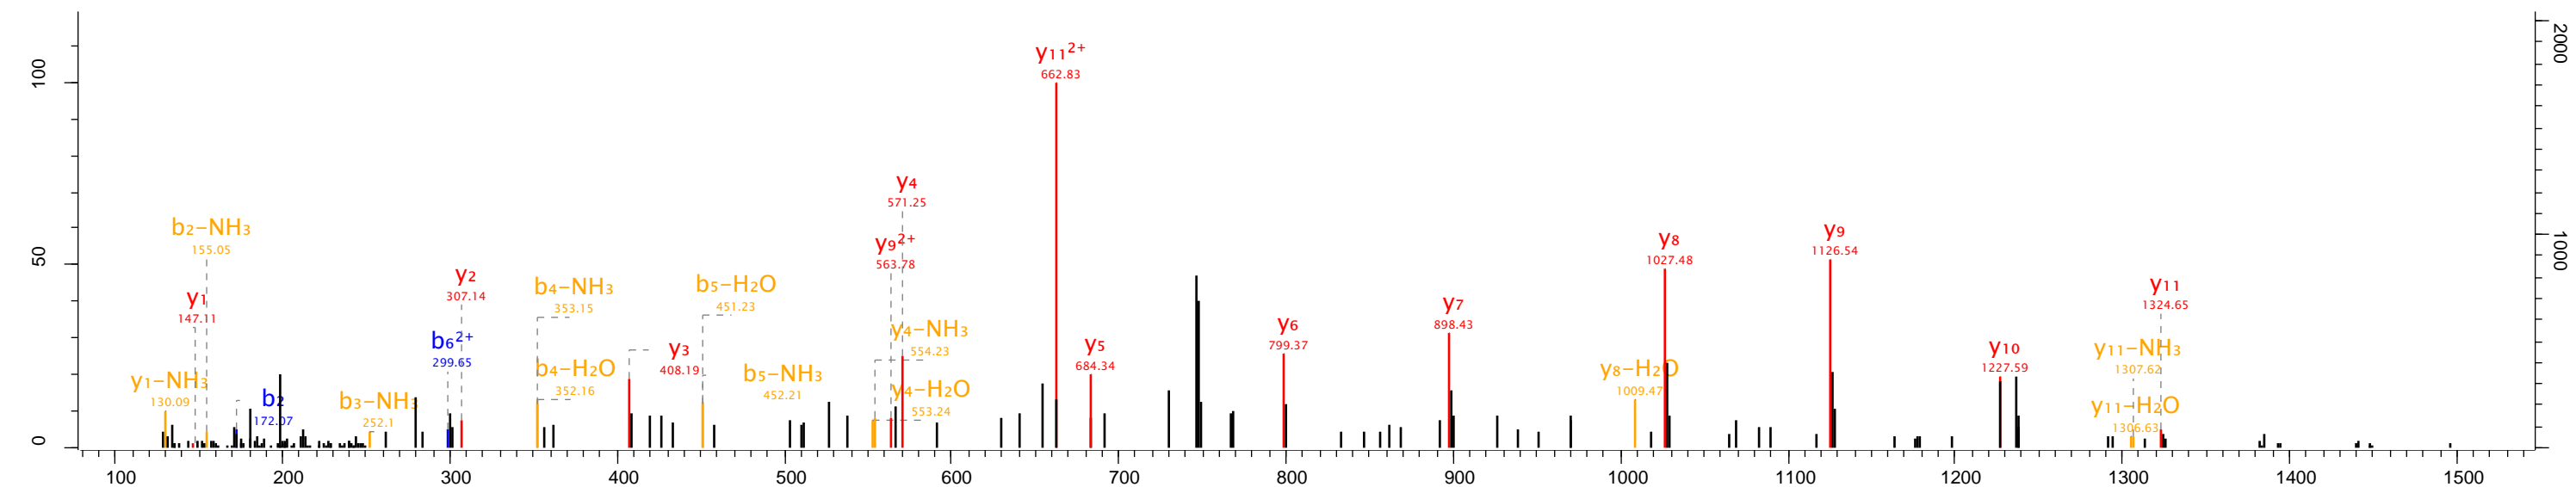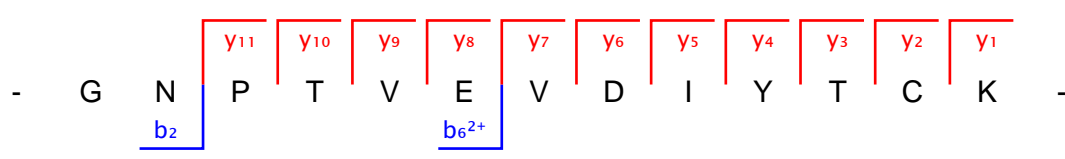

Spectral Annotation for Single-Peptide IDs between Single D11 Cells using Q-OT-LIT

Raw file 2015-01-08\_CL03\_Blastomere-15 Scan 39181 Method ITMS; HCD Score 63.73 m/z 748.36

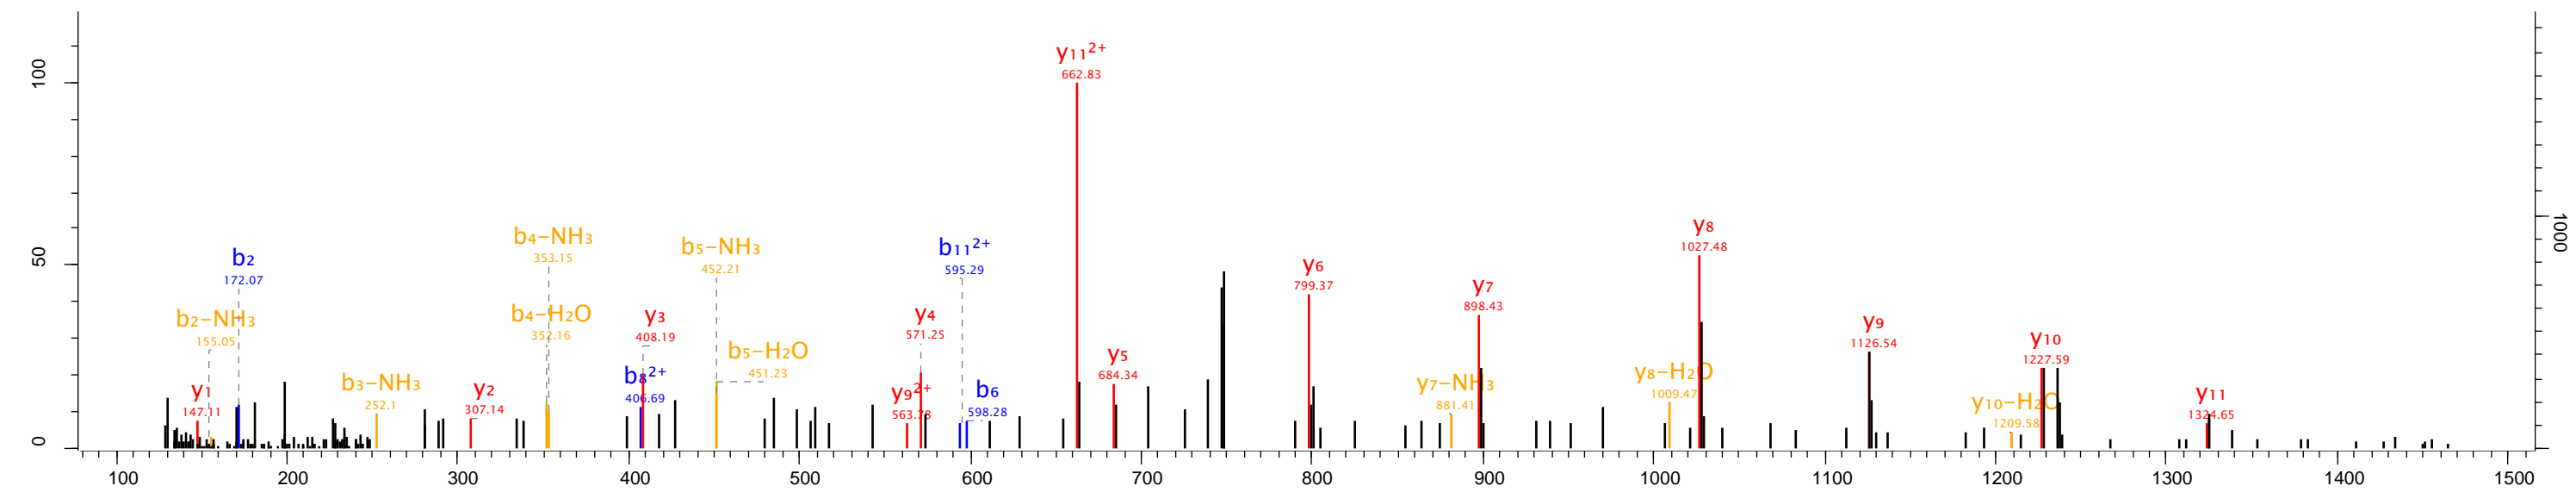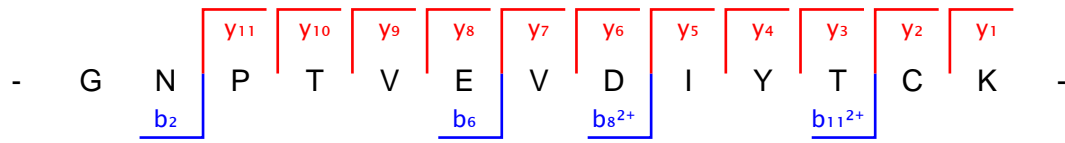

Spectral Annotation for Single-Peptide IDs between Single D11 Cells using Q-OT-LIT

Raw file 2015-01-08\_CL03\_Blastomere-15 Scan 39794 Method ITMS; HCD Score 43.62 m/z 976.5

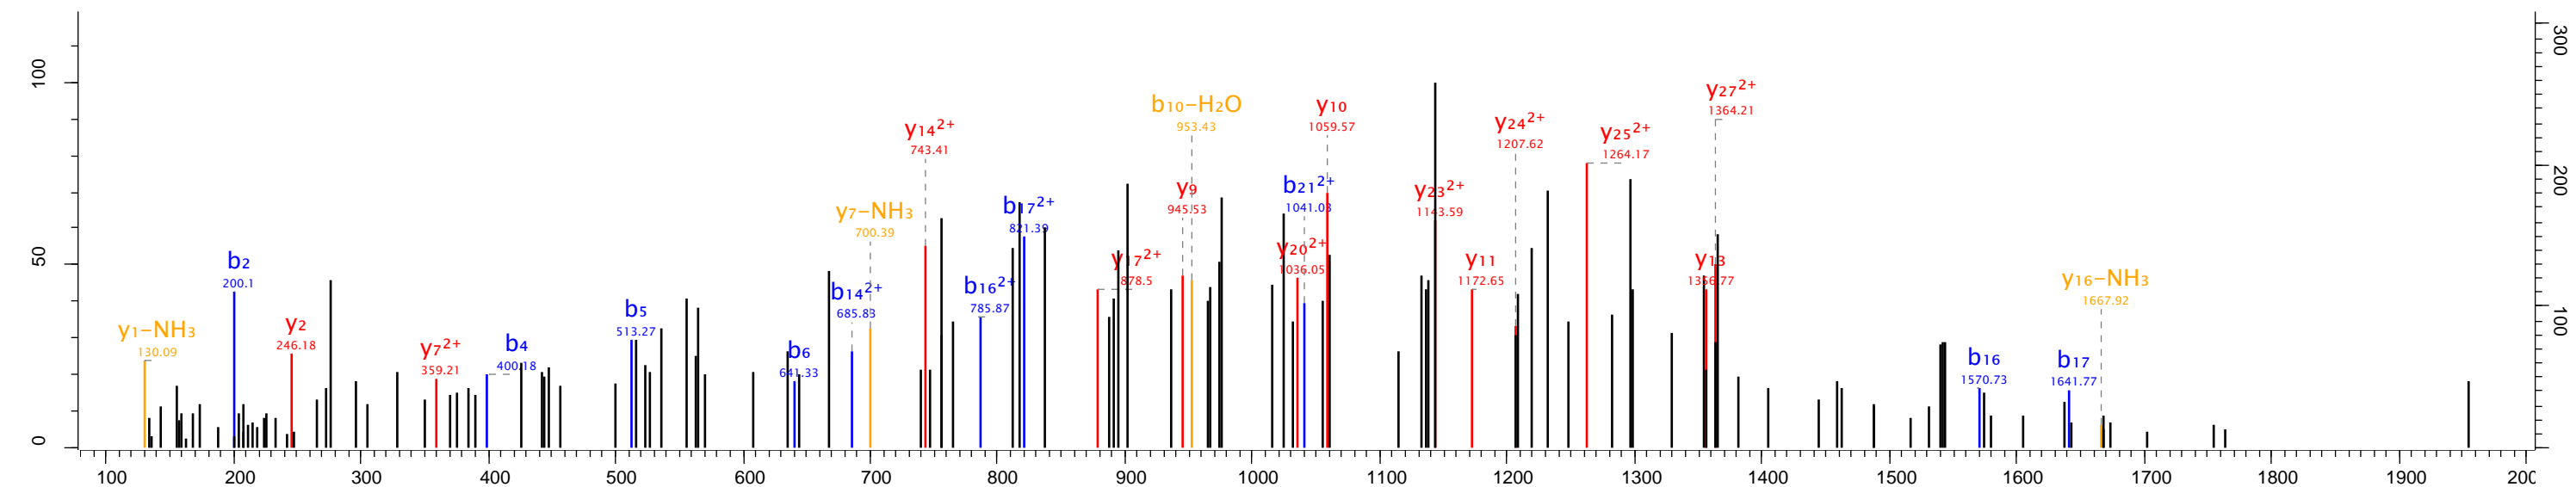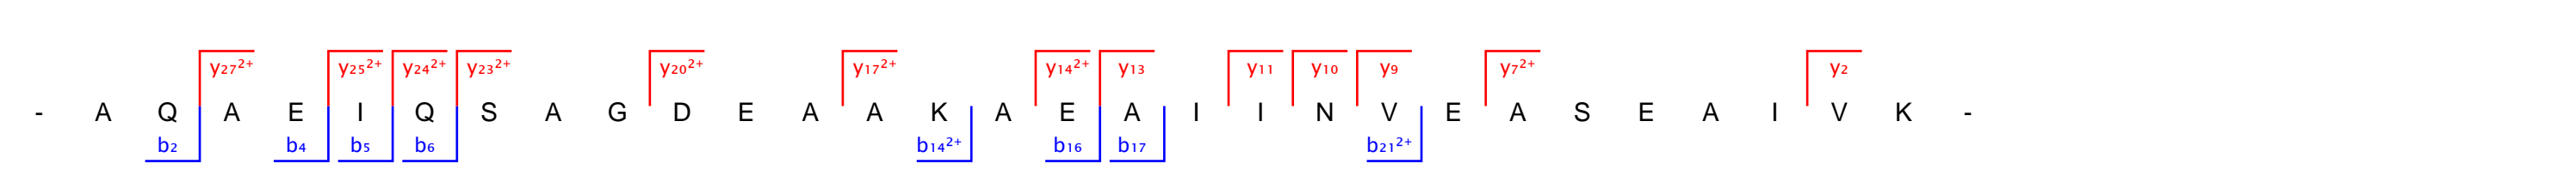

Spectral Annotation for Single-Peptide IDs between Single D11 Cells using Q-OT-LIT

Raw file 2015-01-08\_CL03\_Blastomere-15 Scan 39797 Method ITMS; HCD Score 41.05 m/z 1008.81

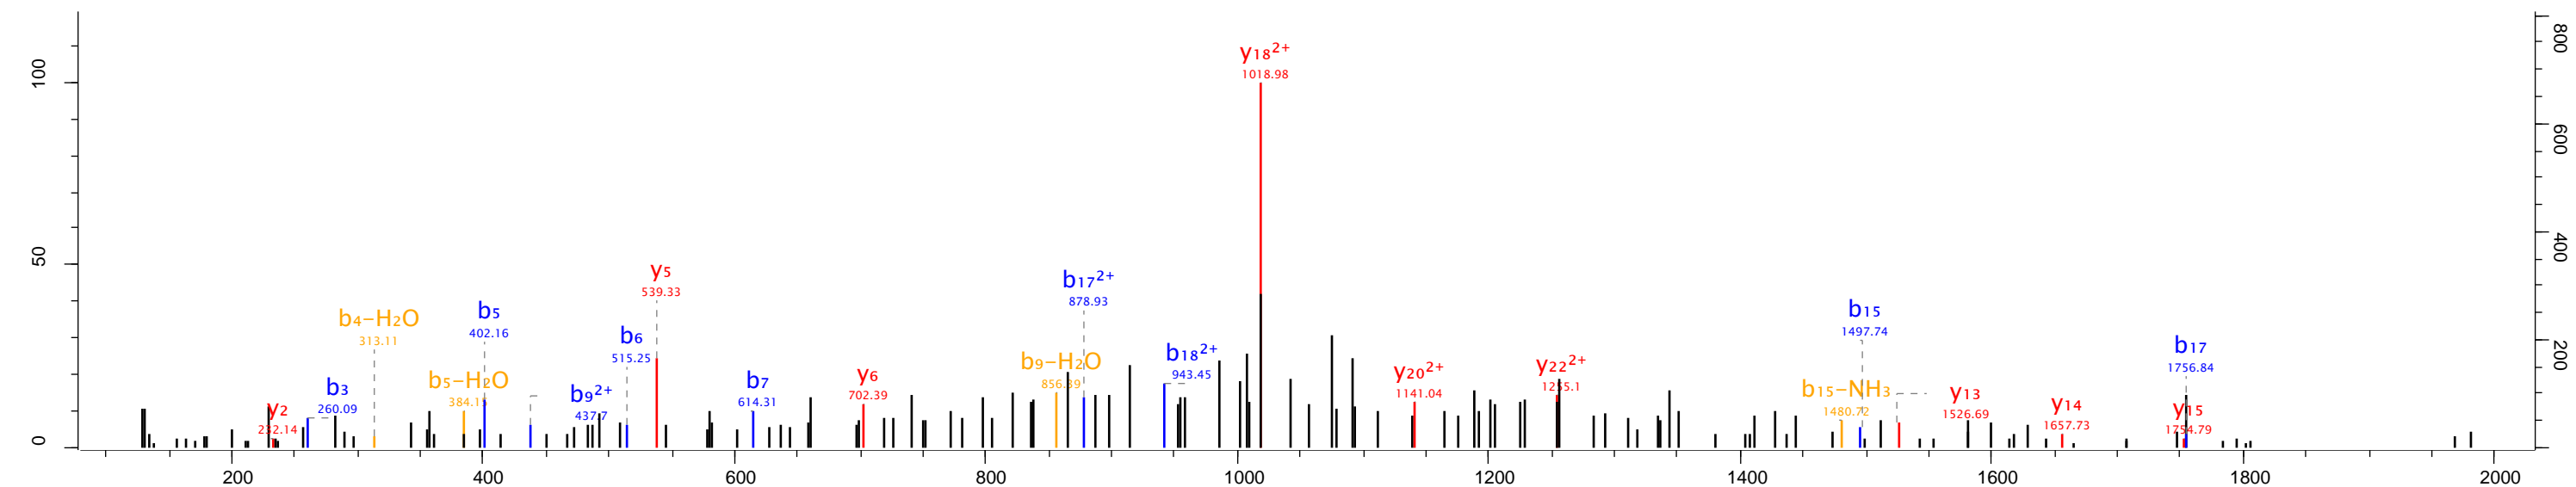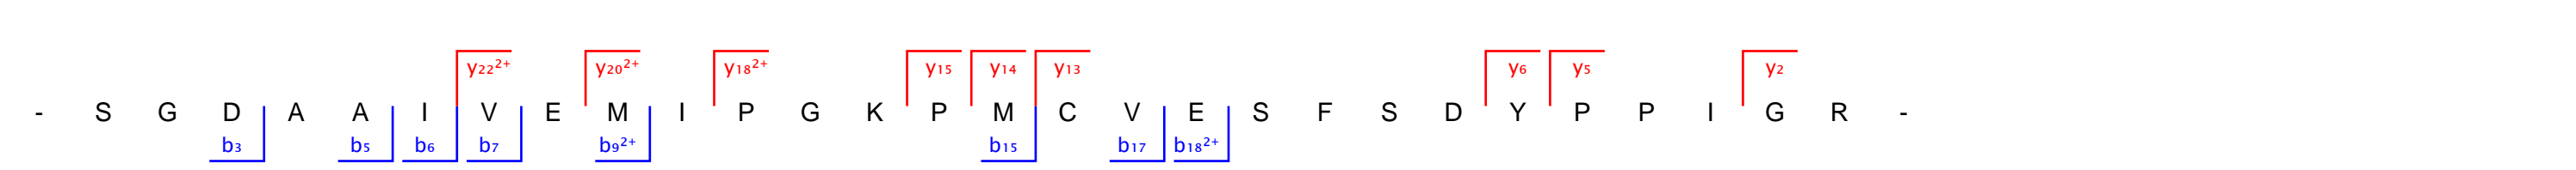

Spectral Annotation for Single-Peptide IDs between Single D11 Cells using Q-OT-LIT

Raw file: 2015-01-08\_CL03\_Blastomere-15  
 Scan: 39879 Method: ITMS; HCD Score: 44.17 m/z: 1013.15

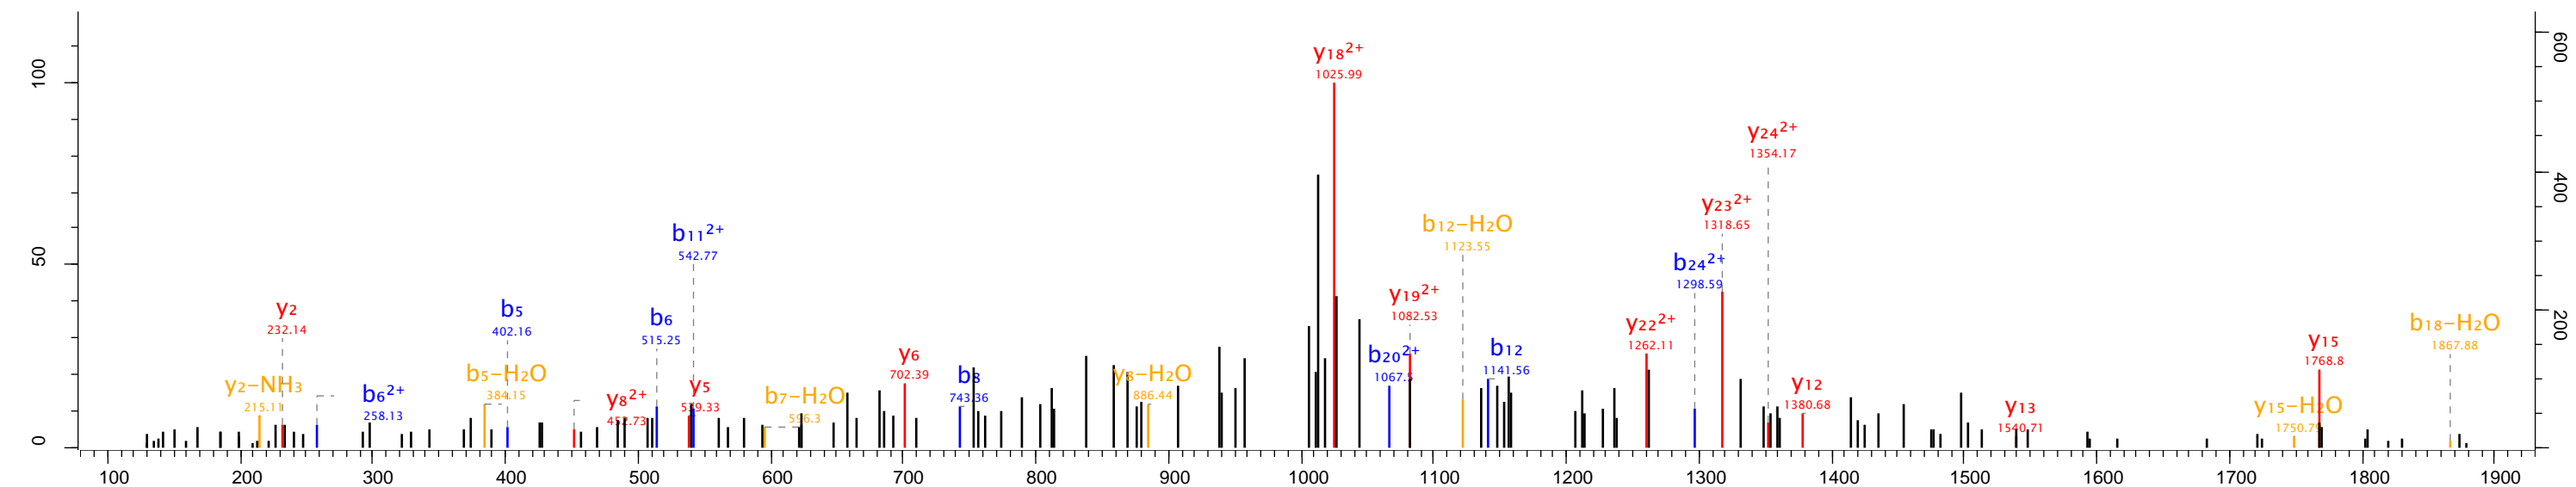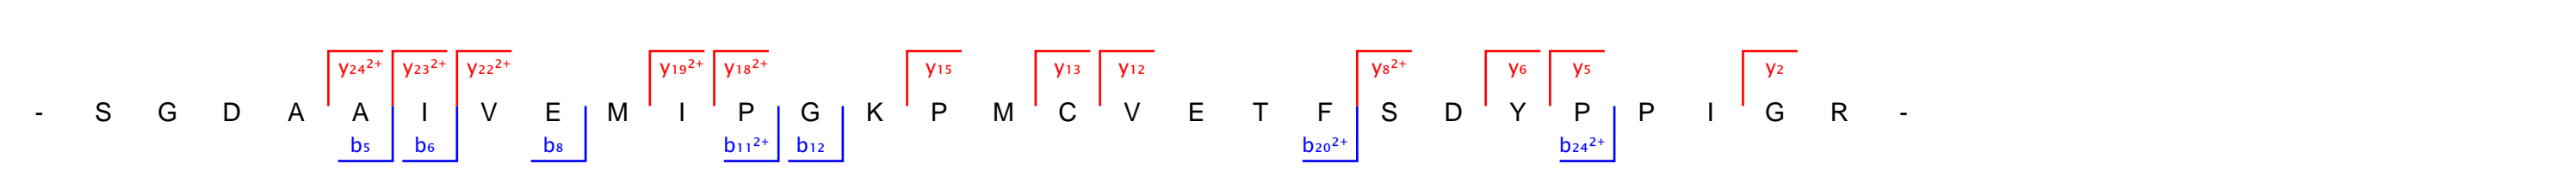

Spectral Annotation for Single-Peptide IDs between Single D11 Cells using Q-OT-LIT



Raw file 2015-01-08\_CL03\_Blastomere-15 Scan 39908 Method ITMS; HCD Score 52.97 m/z 1009.15

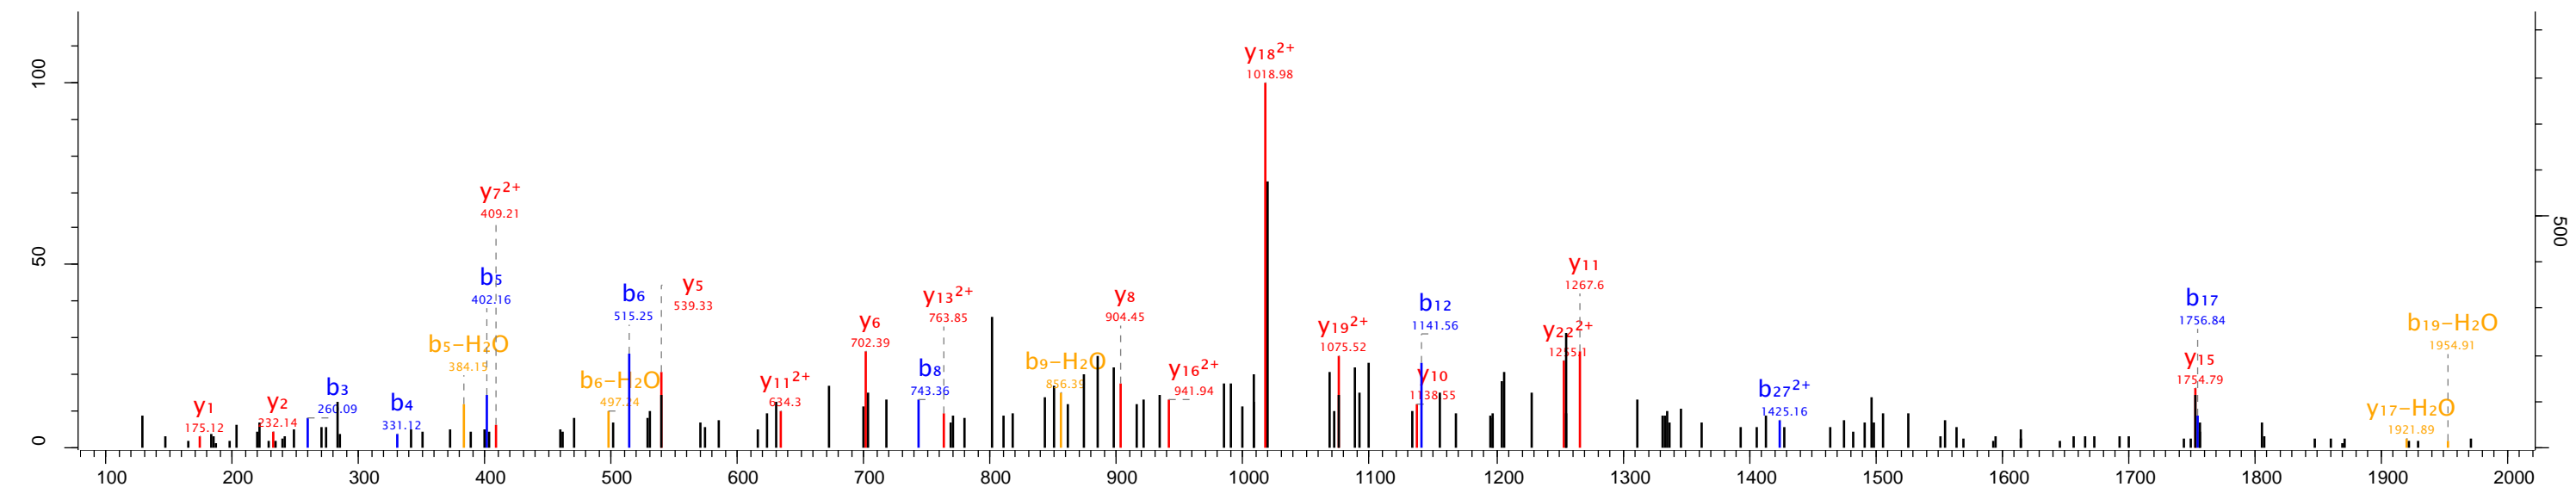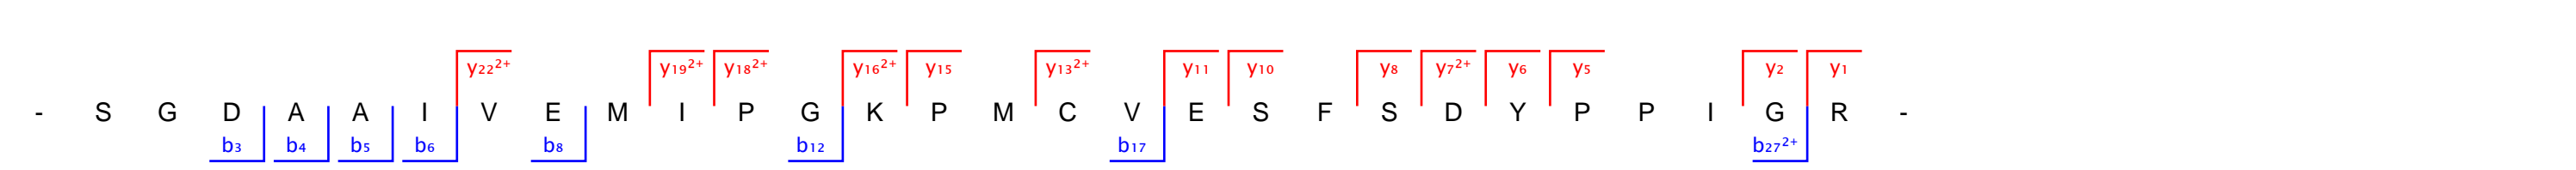

Spectral Annotation for Single-Peptide IDs between Single D11 Cells using Q-OT-LIT

Raw file 2015-01-08\_CL03\_Blastomere-15 Scan 39910 Method ITMS; HCD Score 88.39 m/z 976.84

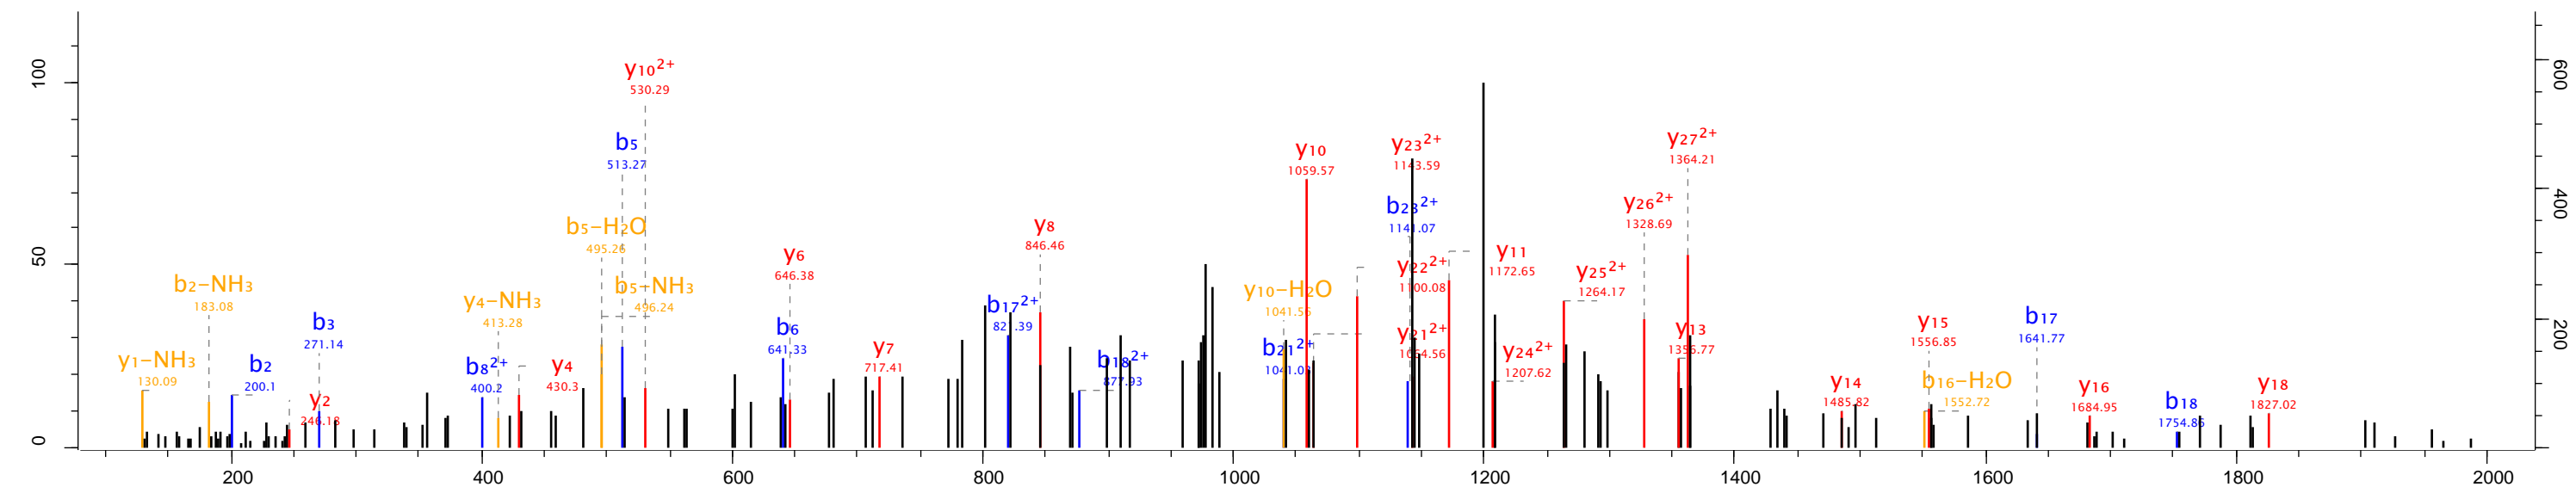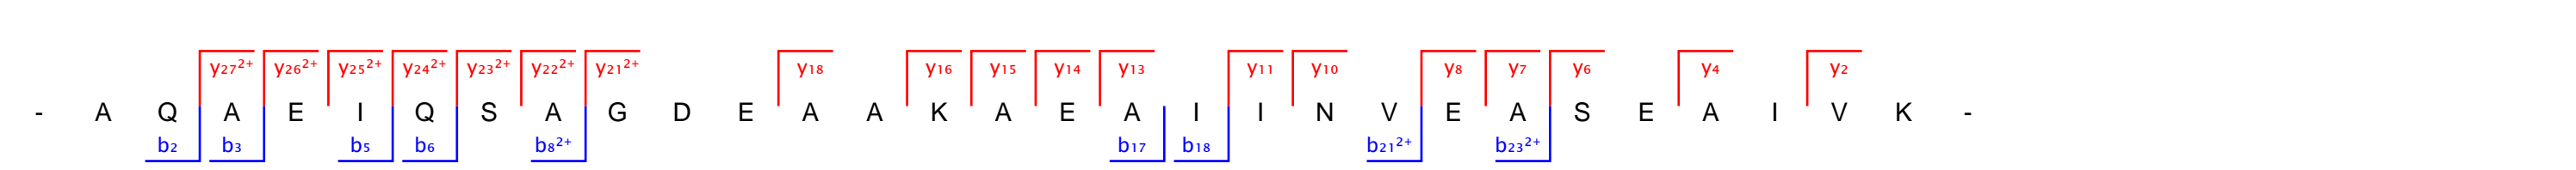

Spectral Annotation for Single-Peptide IDs between Single D11 Cells using Q-OT-LIT

Raw file: 2015-01-08\_CL03\_Blastomere-15  
 Scan: 39928 Method: ITMS; HCD Score: 67.37 m/z: 1009.14

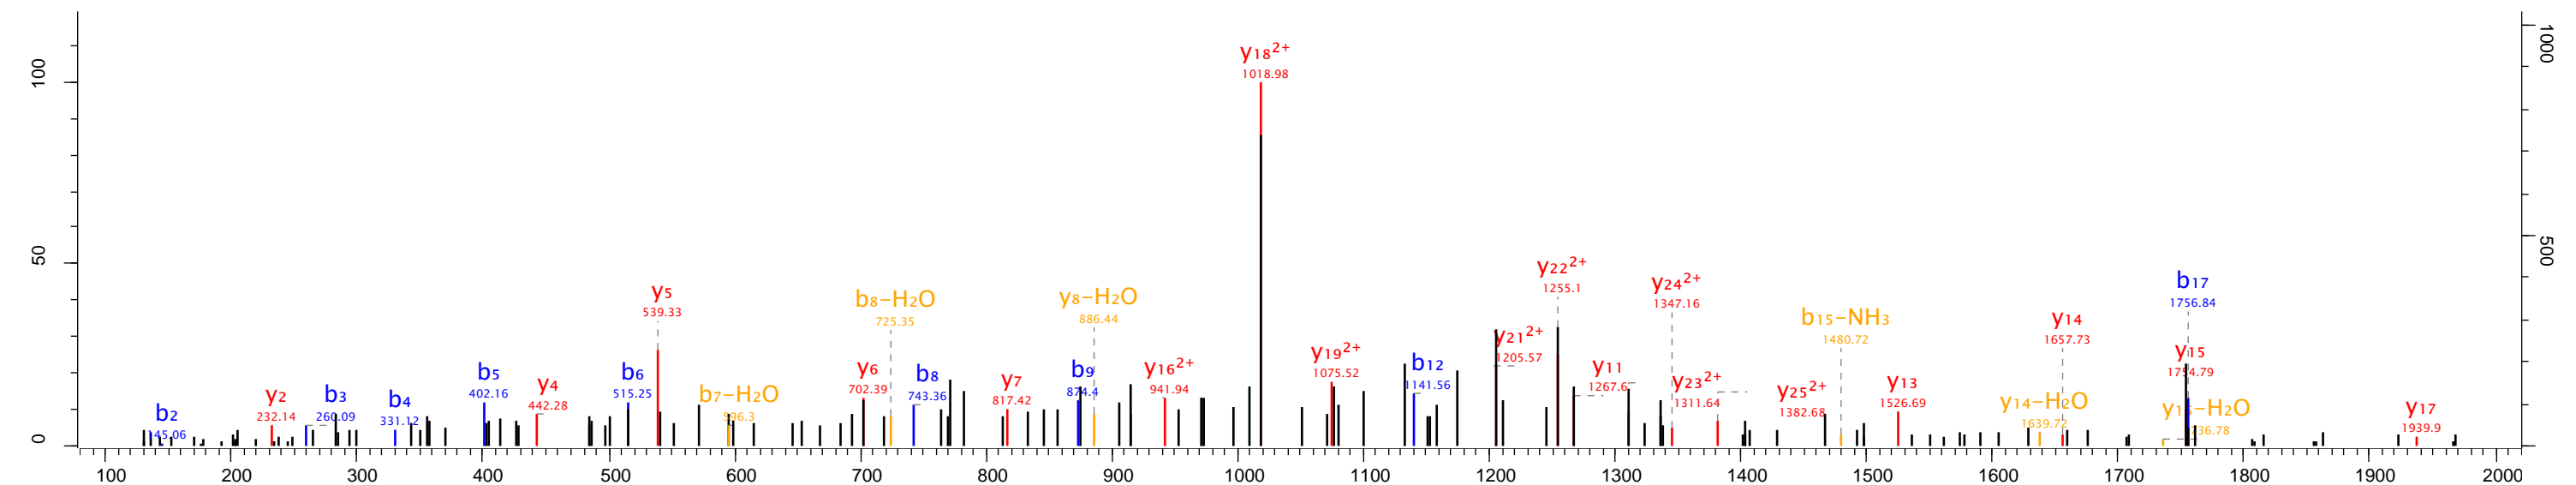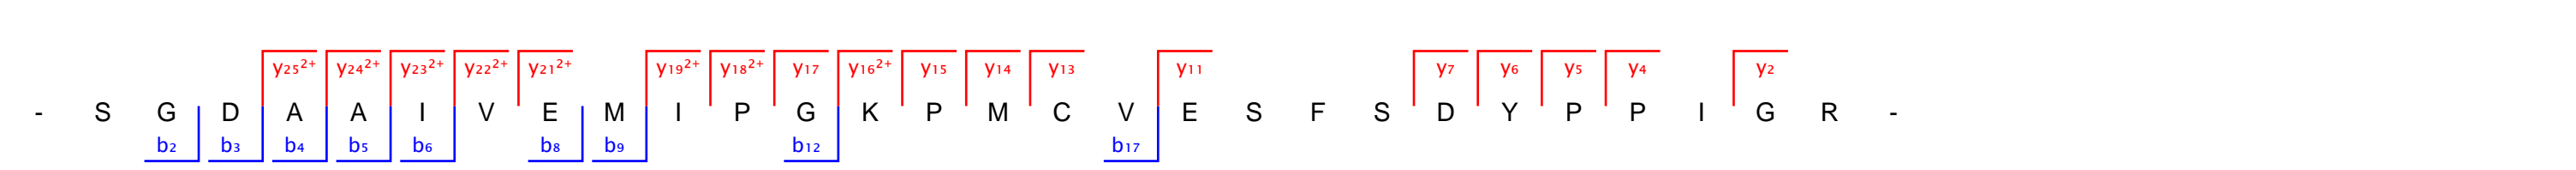

Spectral Annotation for Single-Peptide IDs between Single D11 Cells using Q-OT-LIT

Raw file 2015-01-08\_CL03\_Blastomere-15 Scan 39968 Method ITMS; HCD Score 52.77 m/z 1013.82

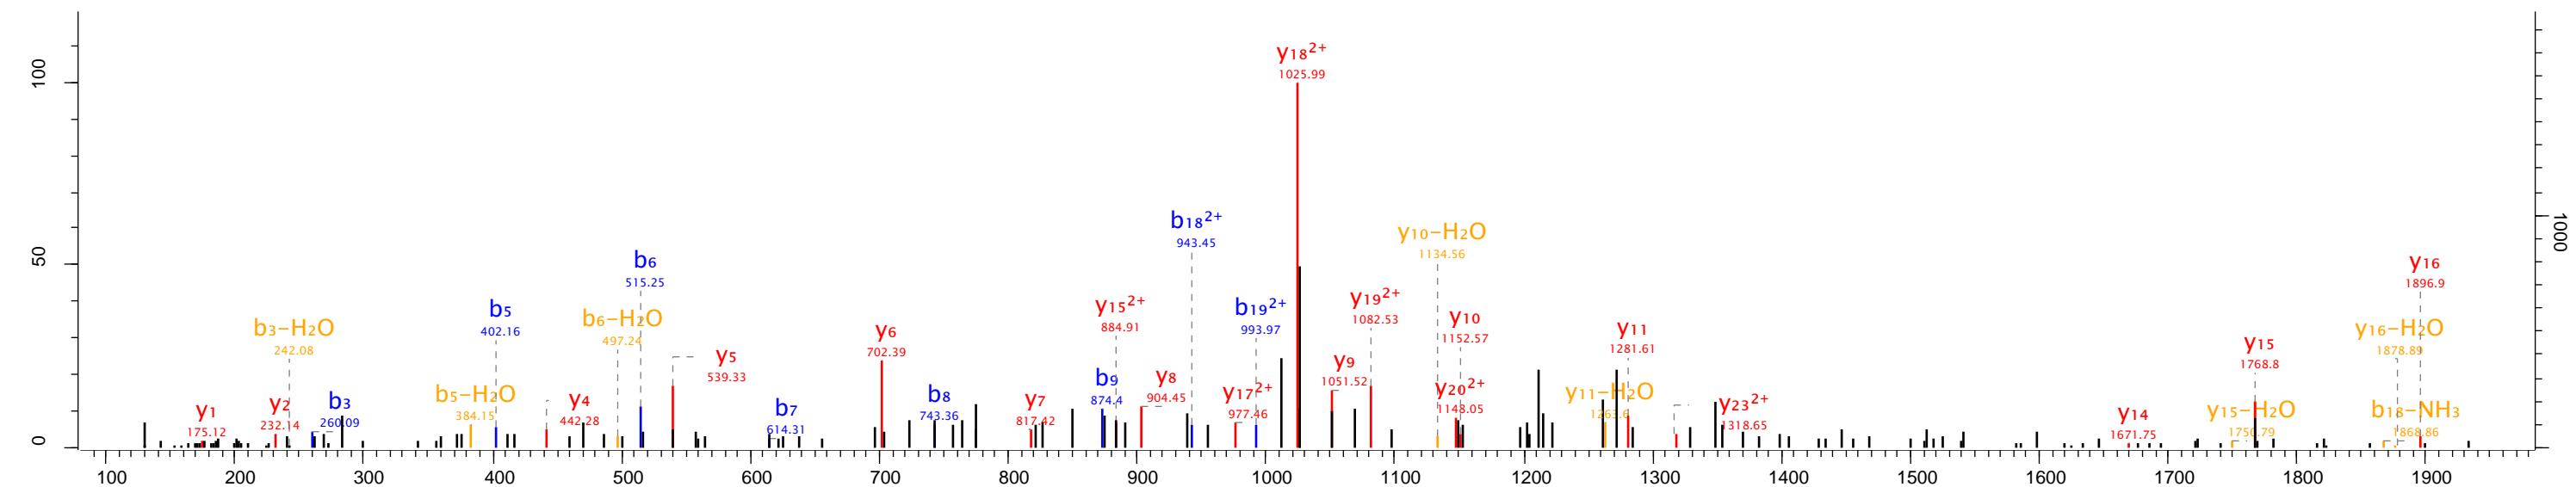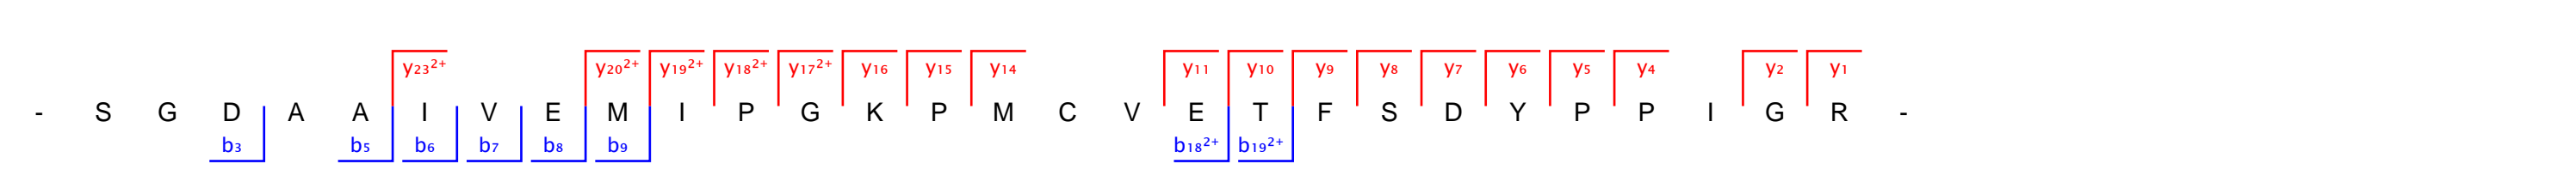

Raw file 2015-01-08\_CL03\_Blastomere-15 Scan 39994 Method ITMS; HCD Score 83.31 m/z 1013.82

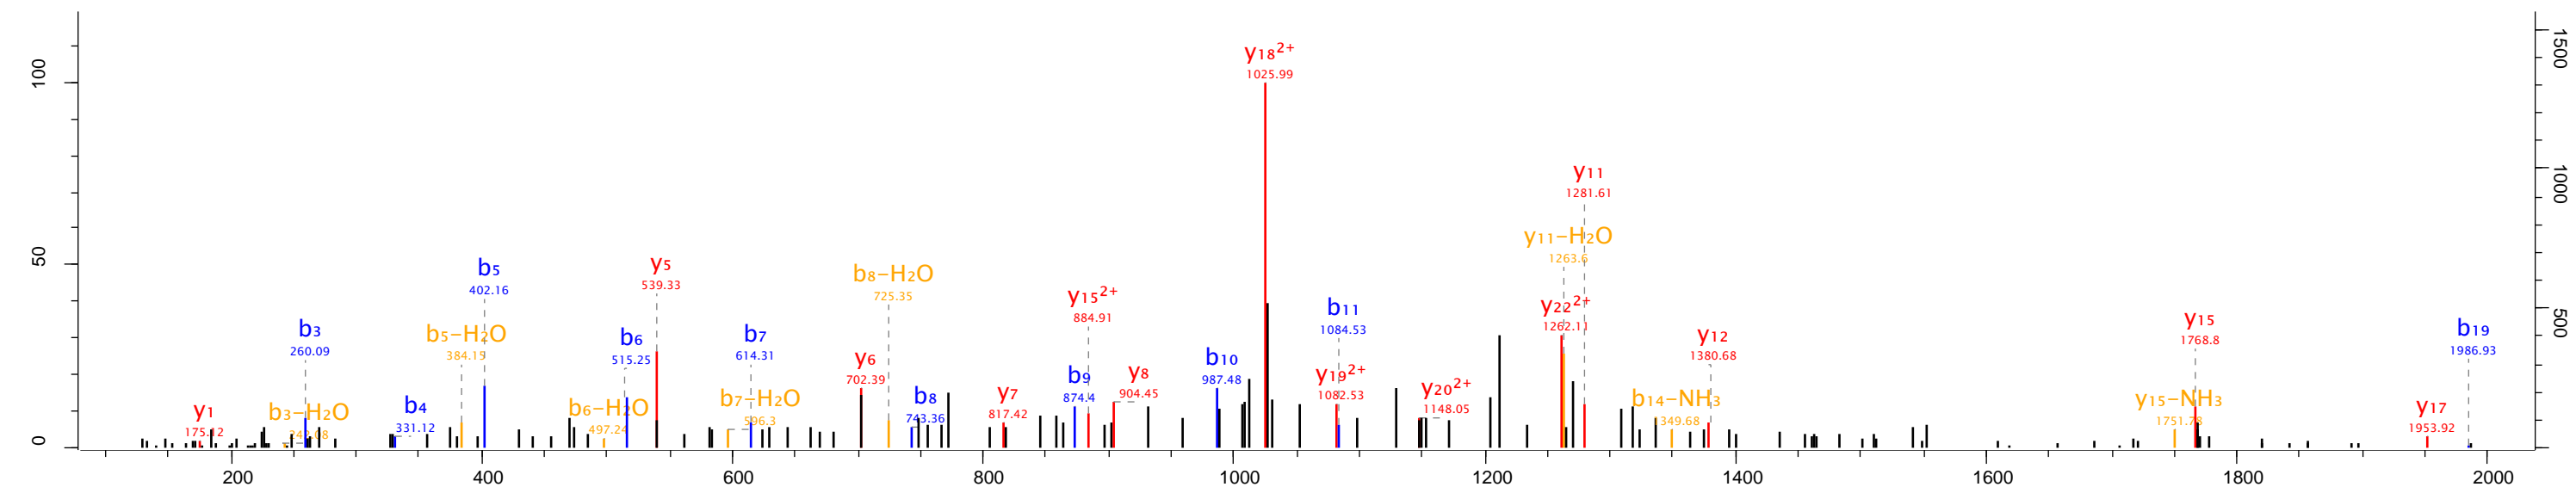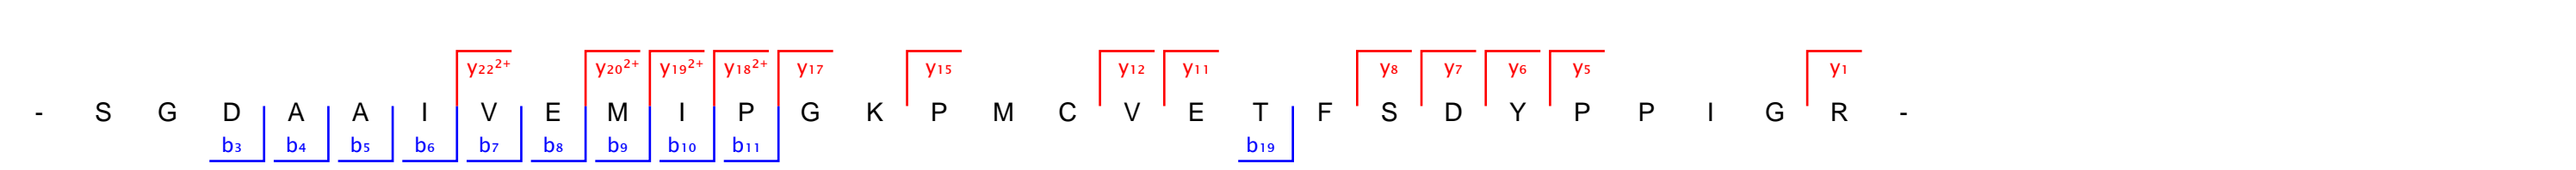

Raw file: 2015-01-08\_CL03\_Blastomere-15  
 Scan: 40007 Method: ITMS; HCD Score: 36.93 m/z: 976.5

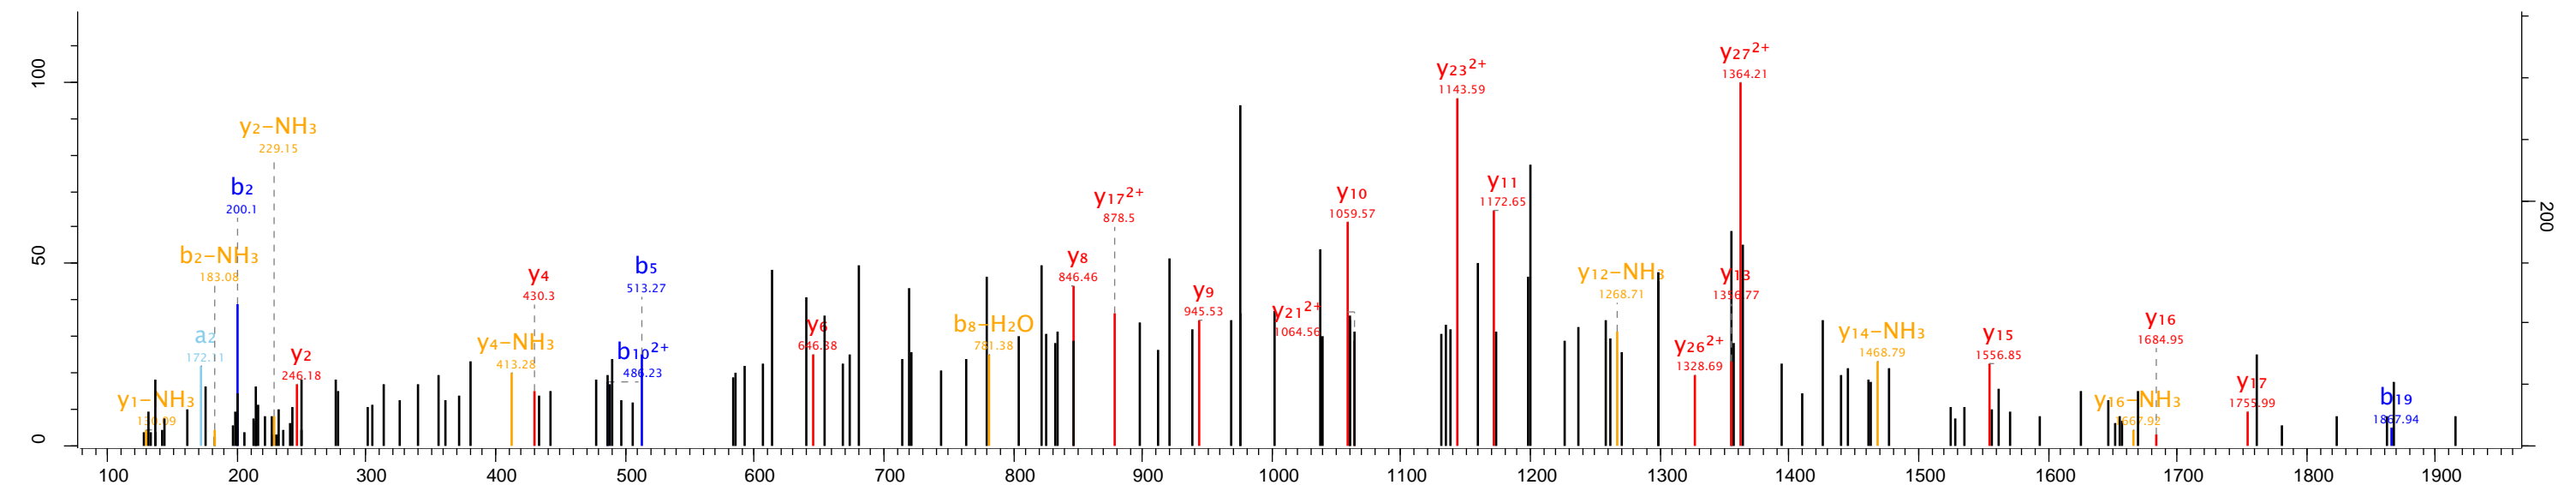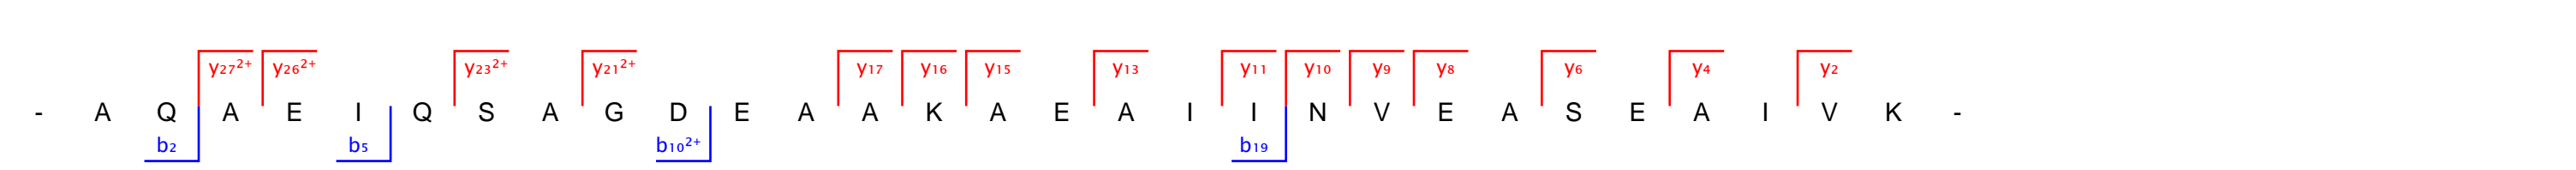

Spectral Annotation for Single-Peptide IDs between Single D11 Cells using Q-OT-LIT

Raw file 2015-01-08\_CL03\_Blastomere-15 Scan 40024 Method ITMS; HCD Score 39.8 m/z 1014.15

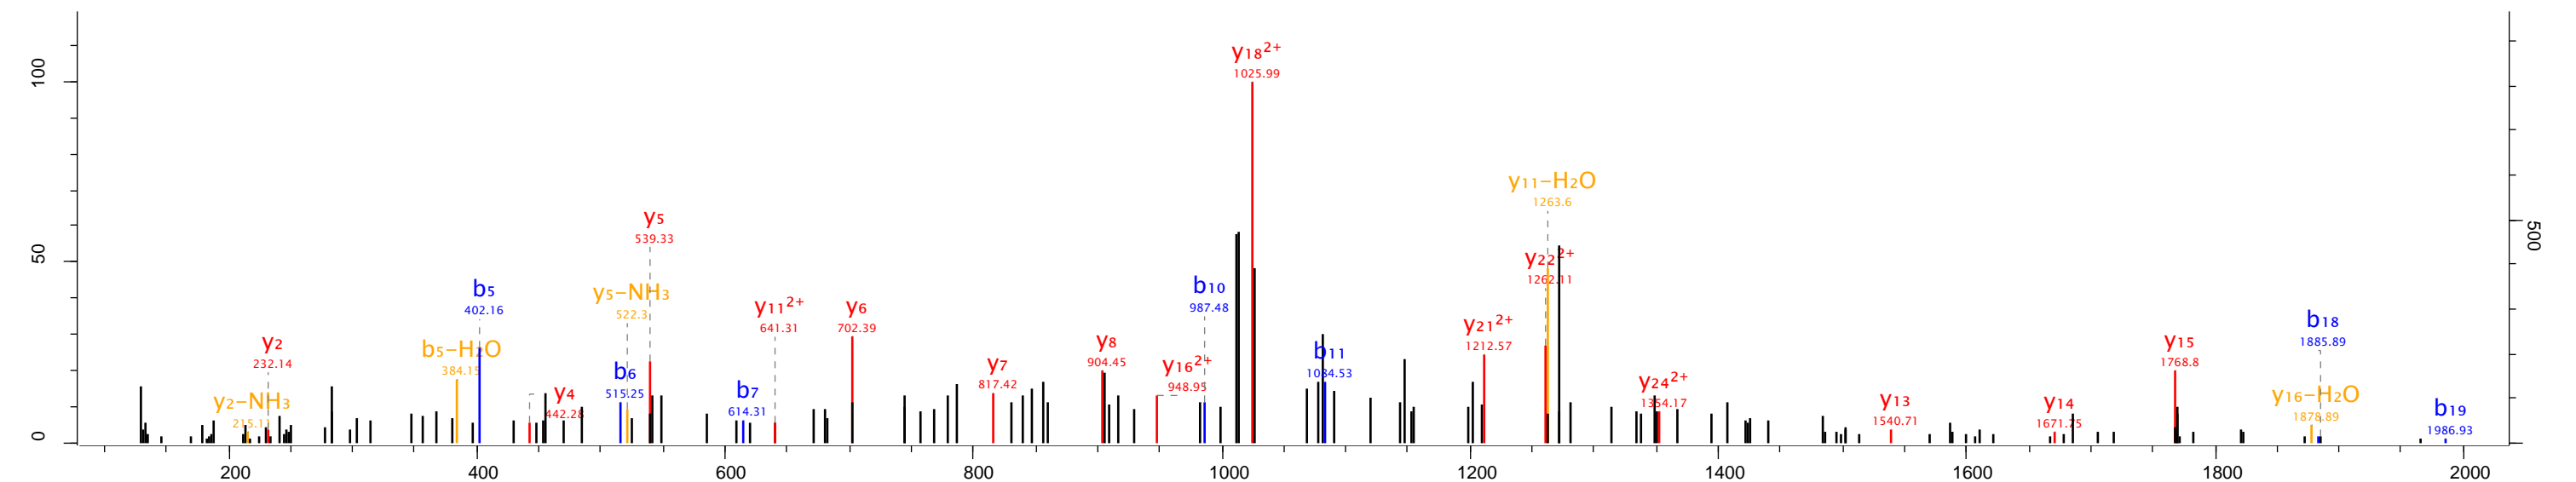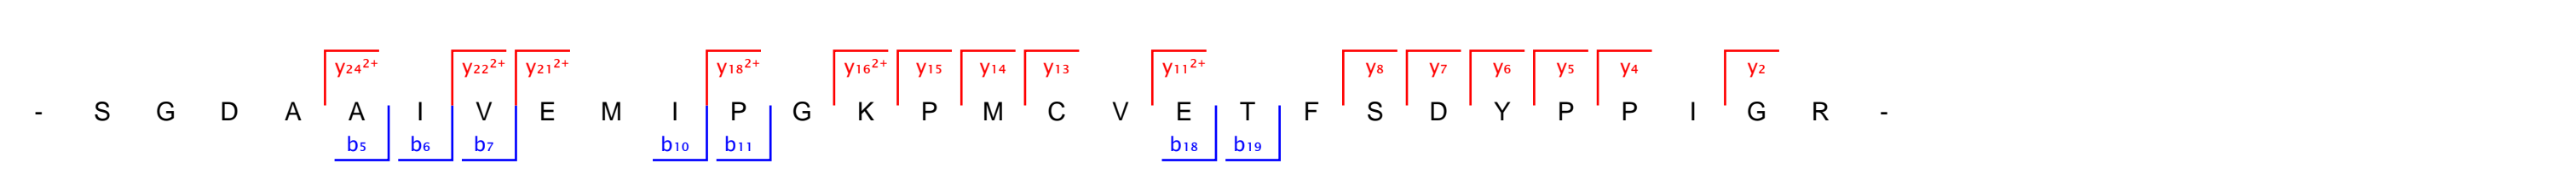

Spectral Annotation for Single-Peptide IDs between Single D11 Cells using Q-OT-LIT

Raw file: 2015-01-08\_CL03\_Blastomere-15  
 Scan: 40126 Method: ITMS; HCD Score: 31.41 m/z: 1014.15

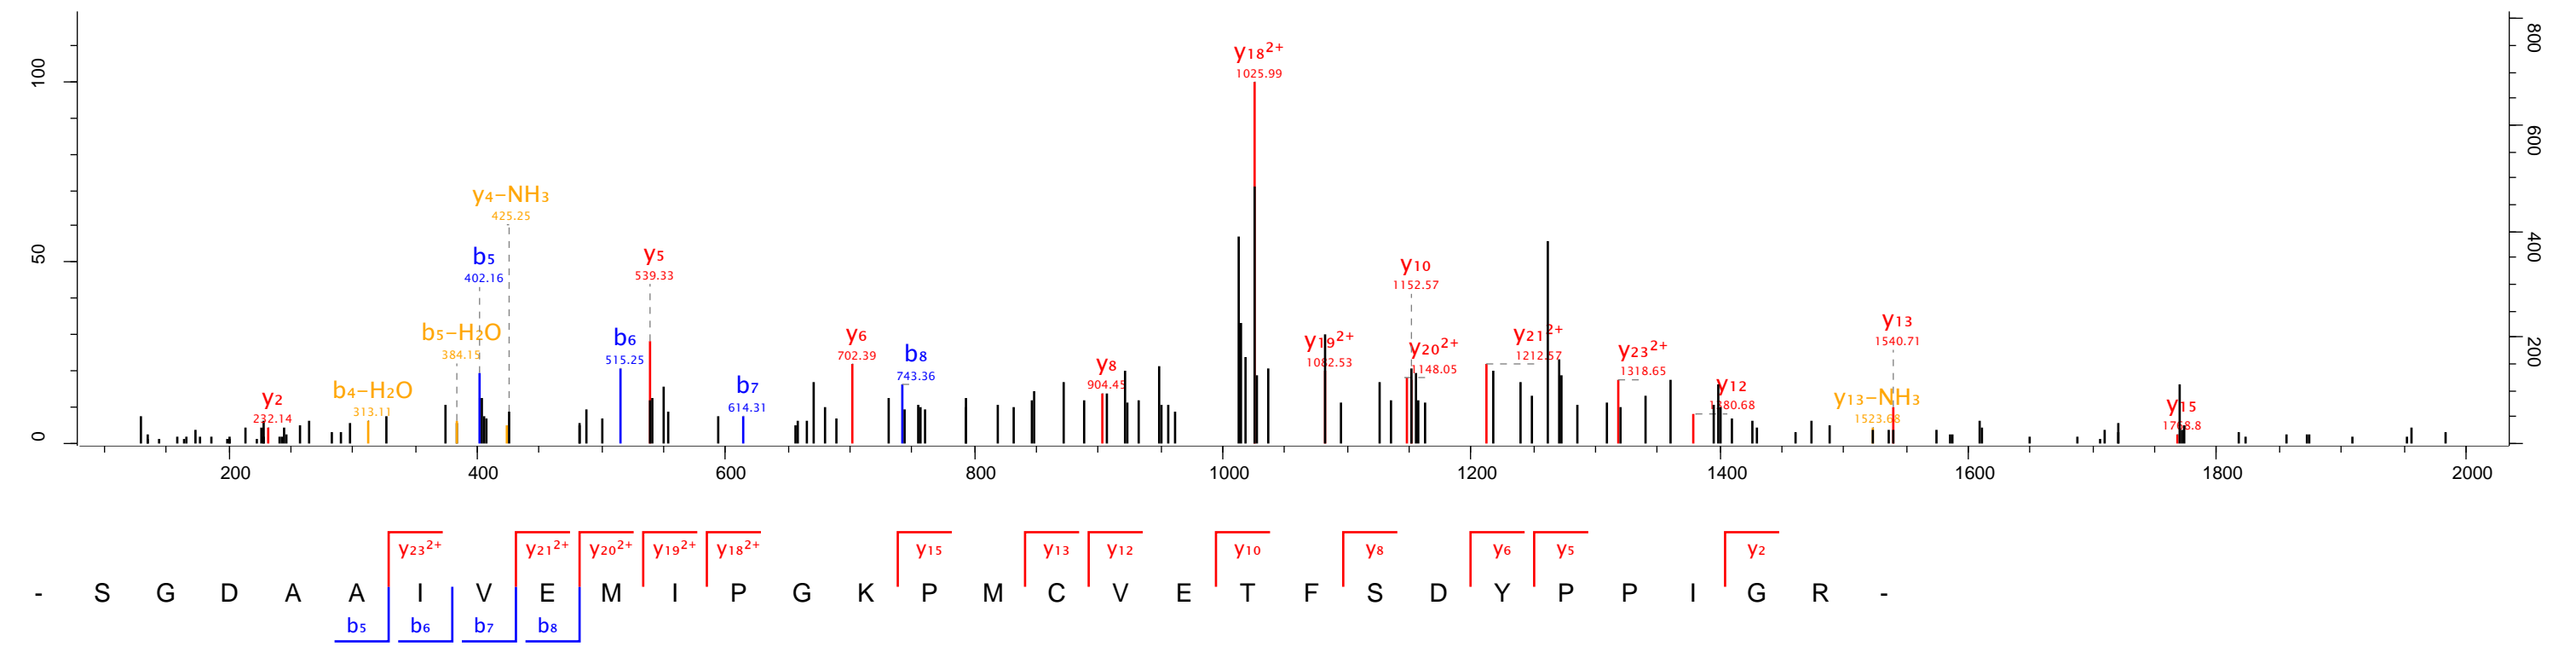



Raw file 2015-01-08\_CL03\_Blastomere-15 Scan 40142 Method ITMS; HCD Score 57.79 m/z 846.43

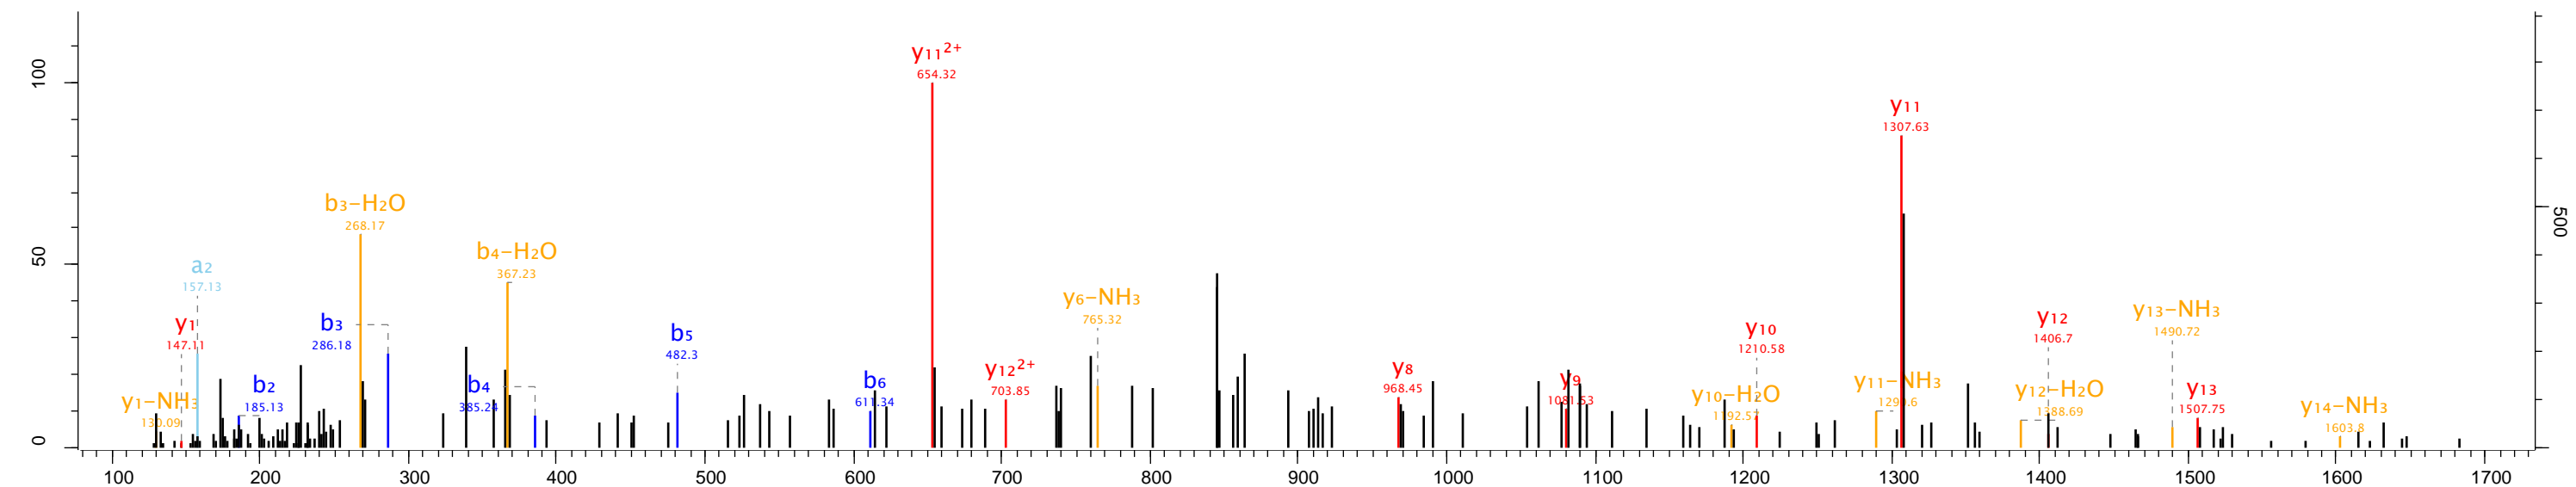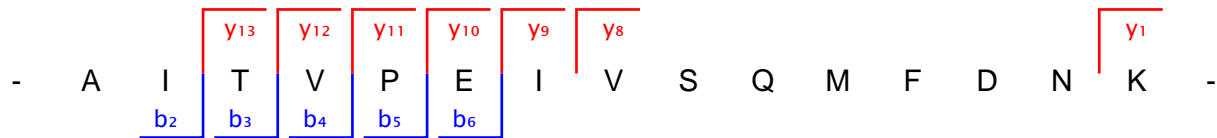

Spectral Annotation for Single-Peptide IDs between Single D11 Cells using Q-OT-LIT

Raw file  
 2015-01-08\_CL03\_Blastomere-15  
 Scan 40143 Method ITMS; HCD Score 34.22 m/z 1013.48

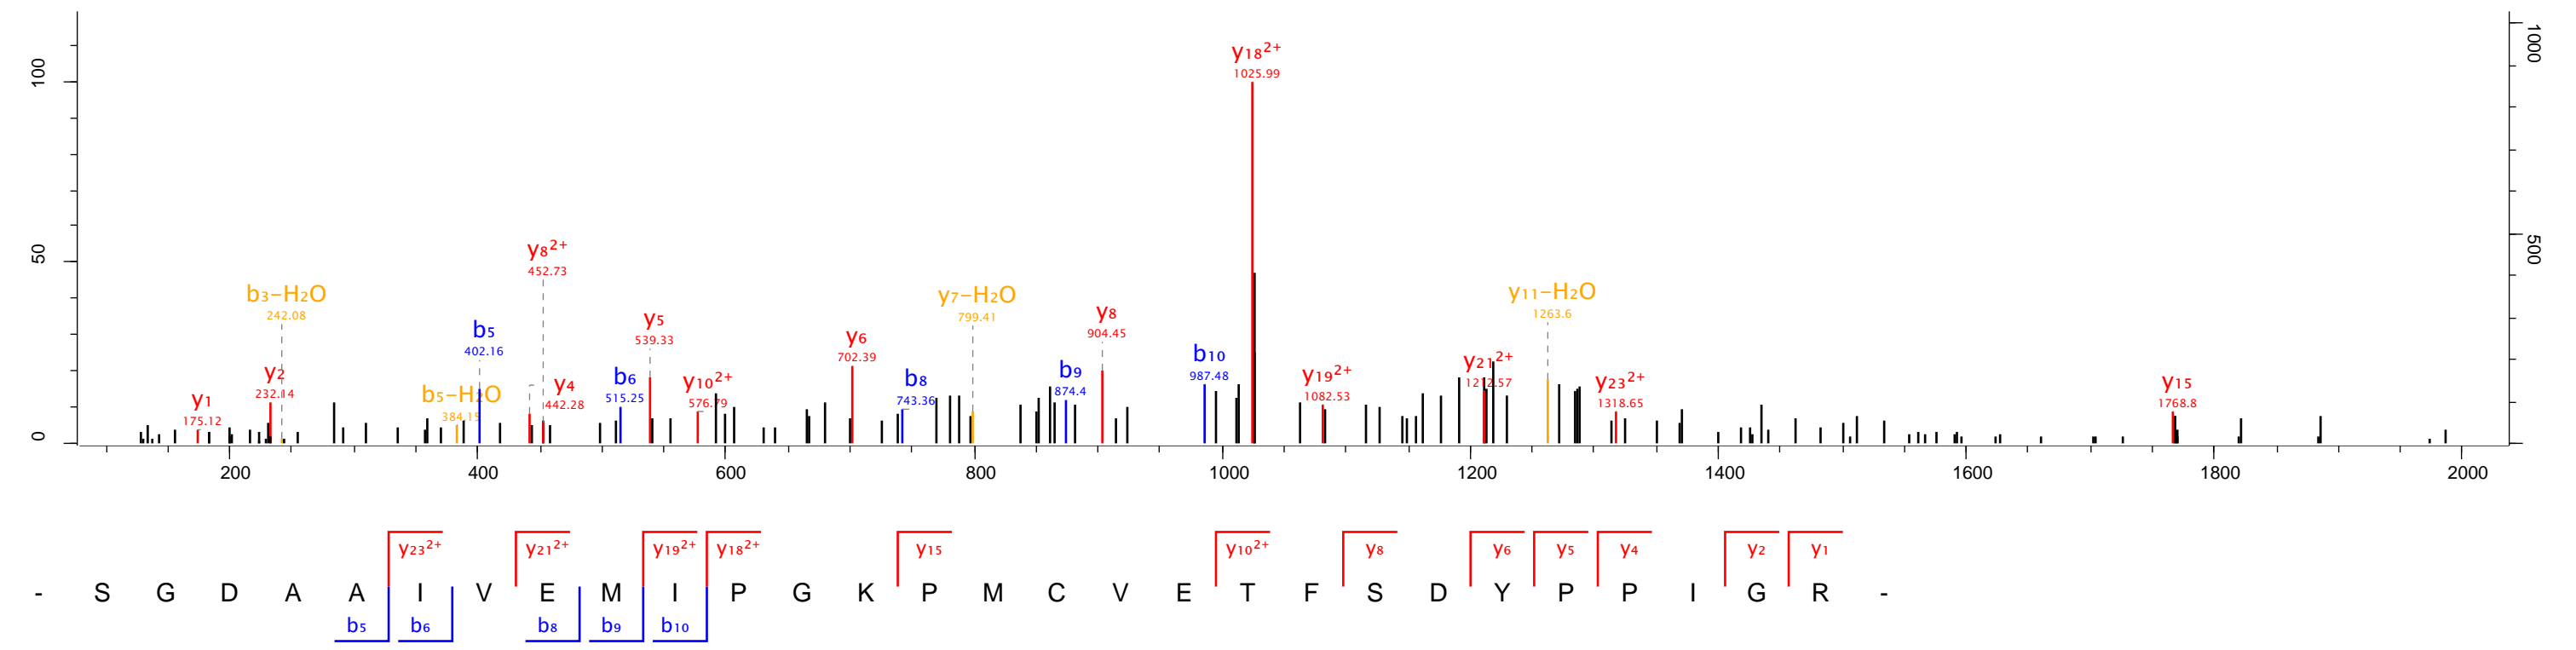

Raw file  
 2015-01-08\_CL03\_Blastomere-15  
 Scan 40202 Method ITMS; HCD Score 57.41 m/z 774.42

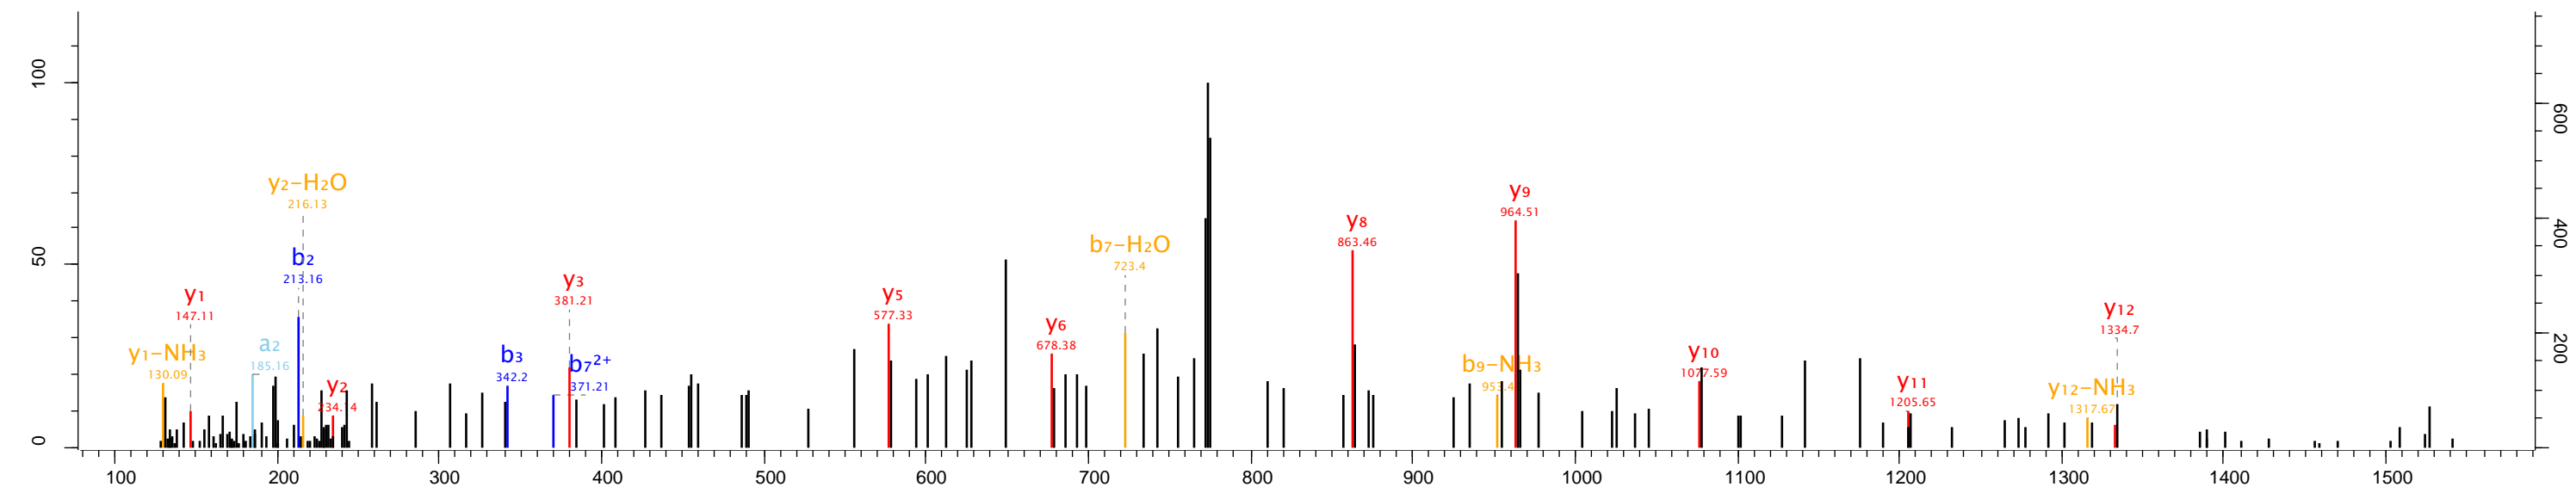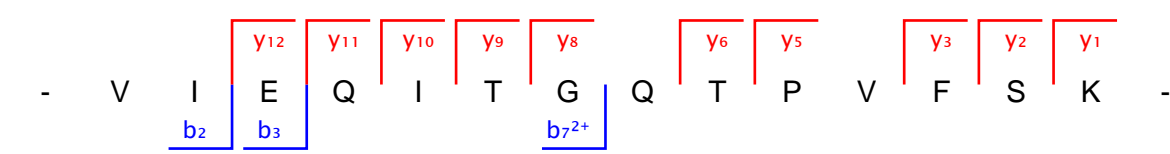

Spectral Annotation for Single-Peptide IDs between Single D11 Cells using Q-OT-LIT

Raw file 2015-01-08\_CL03\_Blastomere-15 Scan 40237 Method ITMS; HCD Score 83.29 m/z 774.43

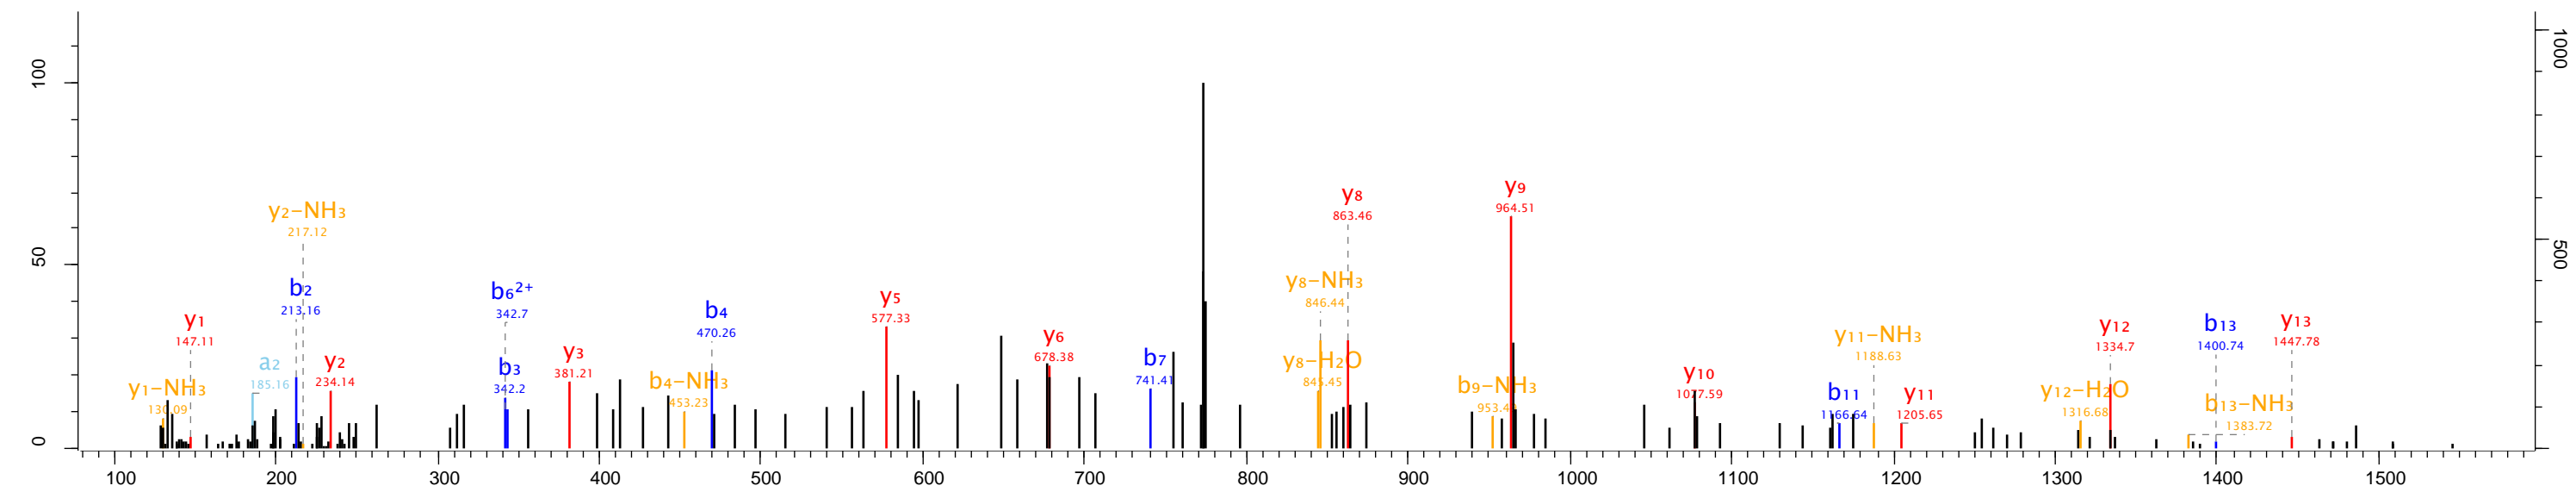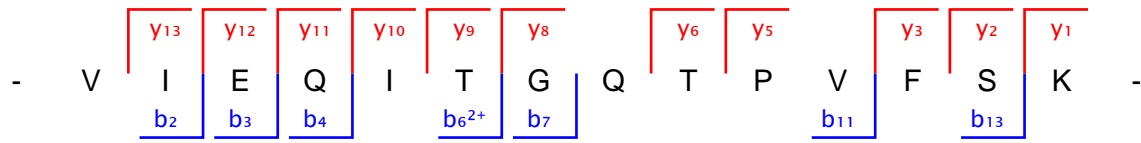

Spectral Annotation for Single-Peptide IDs between Single D11 Cells using Q-OT-LIT

Raw file: 2015-01-08\_CL03\_Blastomere-15  
 Scan: 40308 Method: ITMS; HCD Score: 26.65 m/z: 1013.49

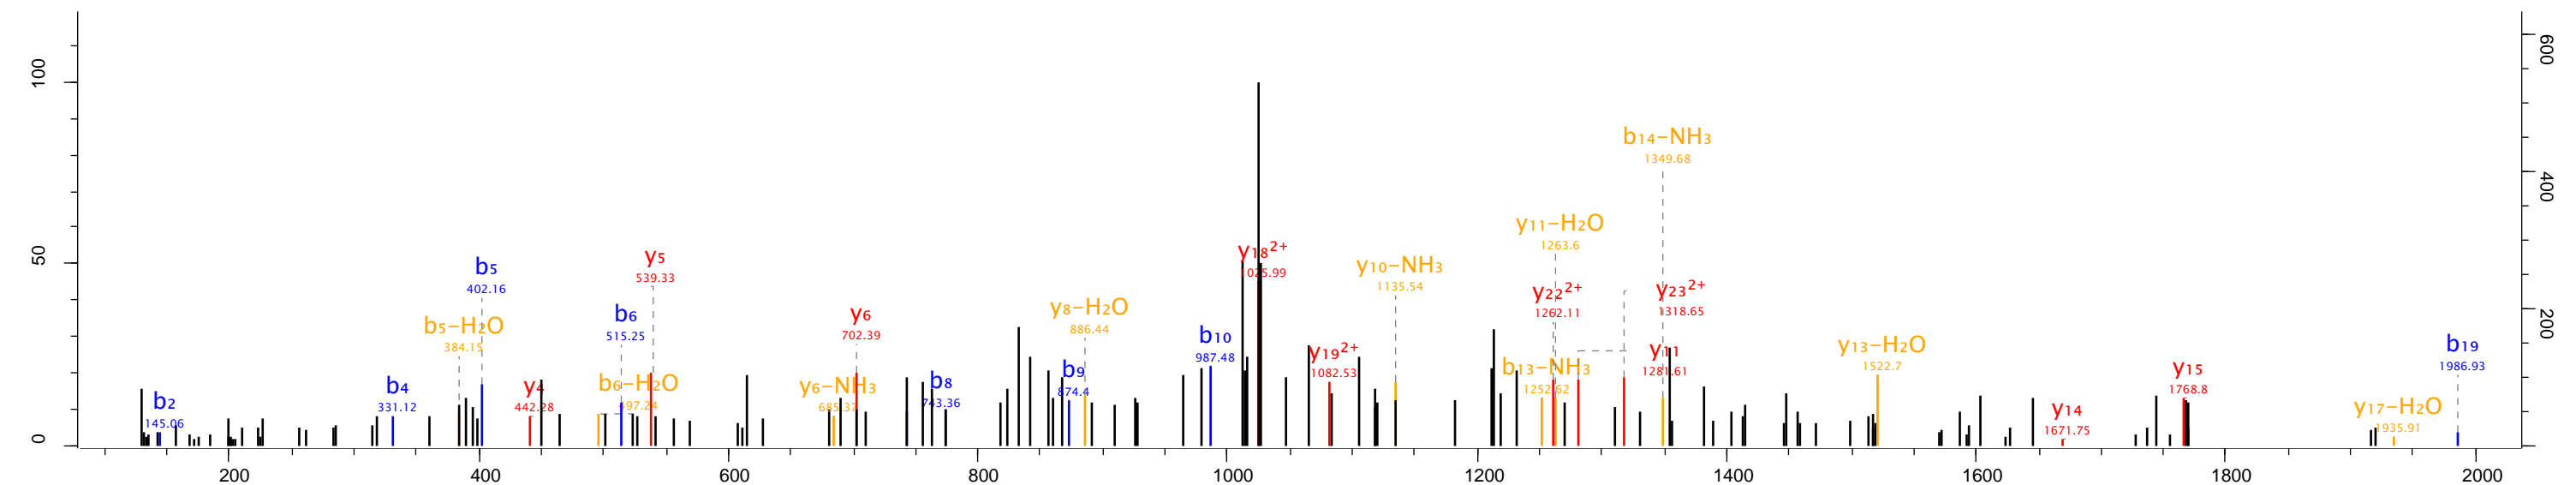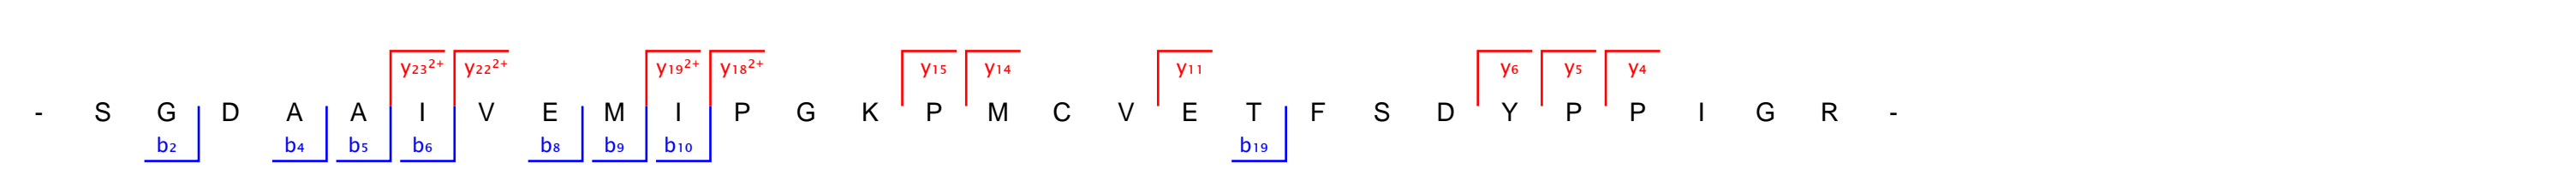

Spectral Annotation for Single-Peptide IDs between Single D11 Cells using Q-OT-LIT

Raw file: 2015-01-08\_CL03\_Blastomere-15  
 Scan: 40324 Method: ITMS; HCD Score: 39.99 m/z: 1008.48

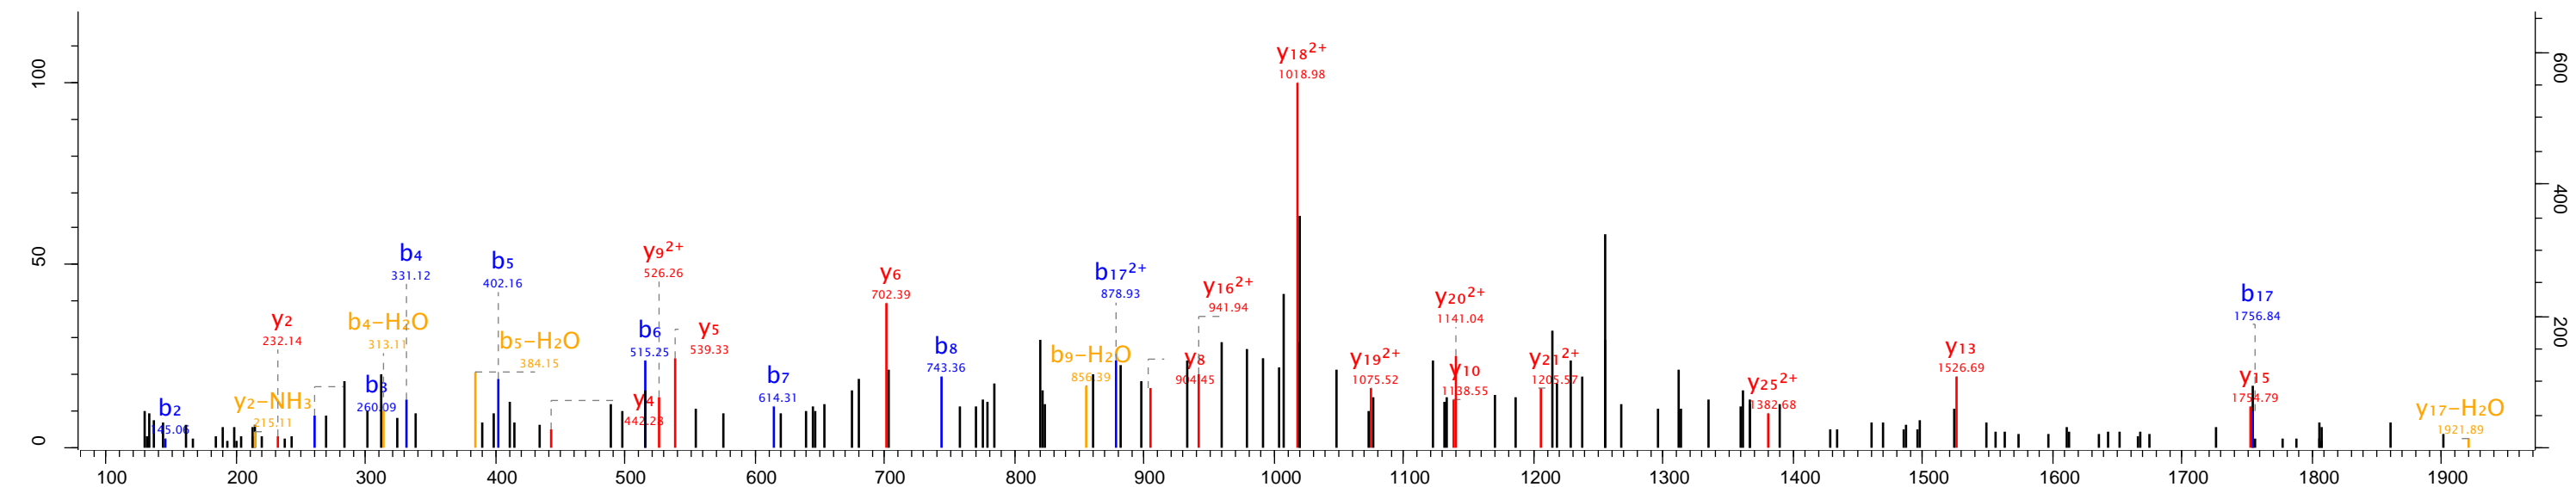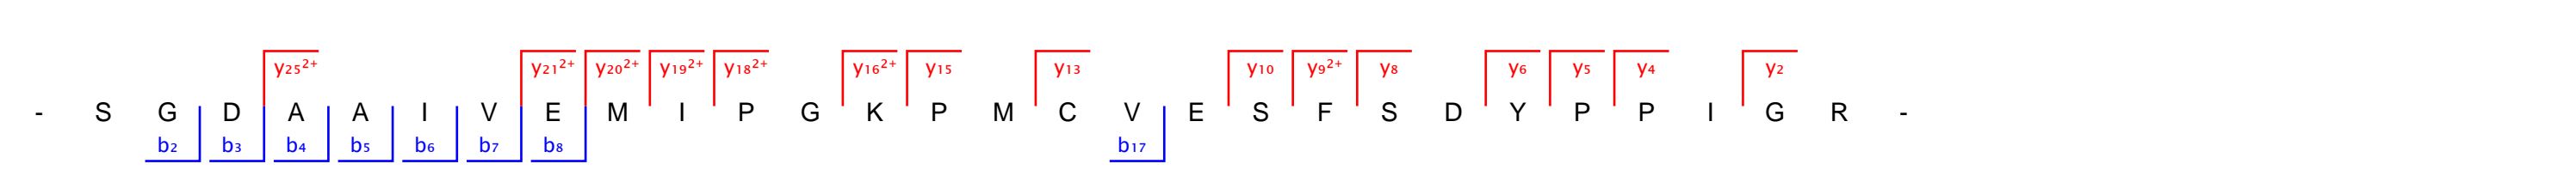

Spectral Annotation for Single-Peptide IDs between Single D11 Cells using Q-OT-LIT

Raw file: 2015-01-08\_CL03\_Blastomere-15  
 Scan: 40348 Method: ITMS; HCD Score: 36.72 m/z: 1009.14

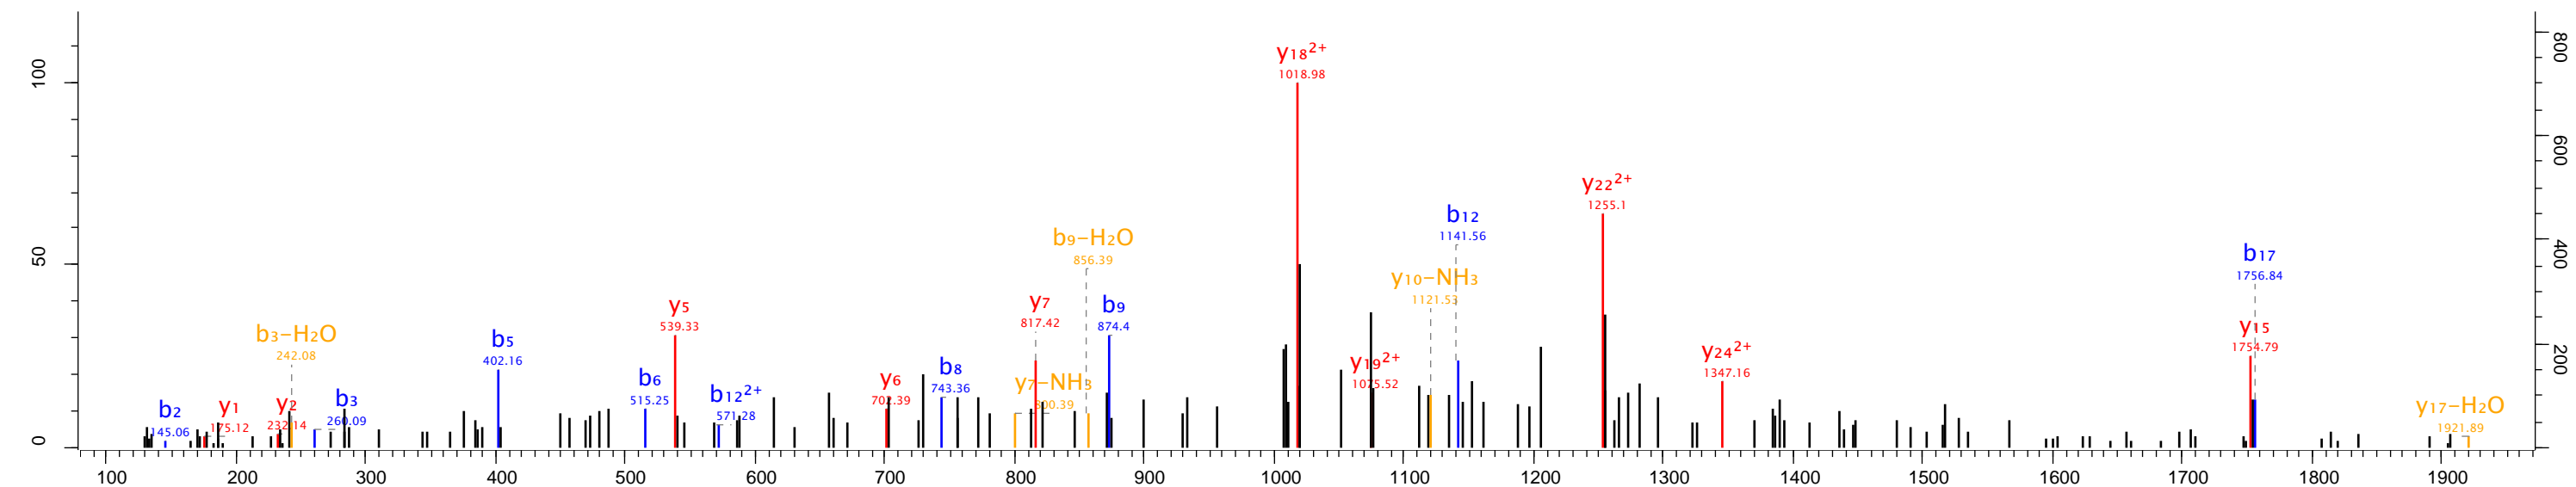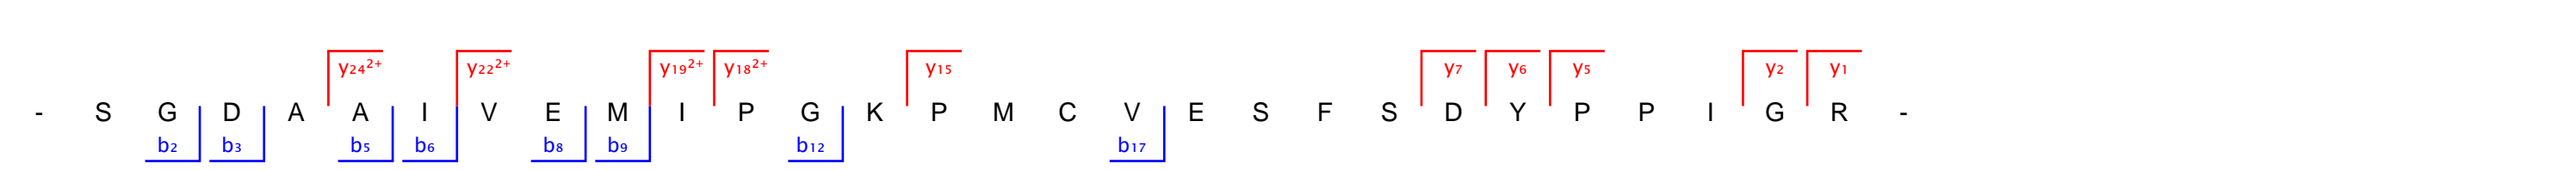

Raw file: 2015-01-08\_CL03\_Blastomere-15  
 Scan: 40426 Method: ITMS; HCD Score: 31.13 m/z: 1013.15

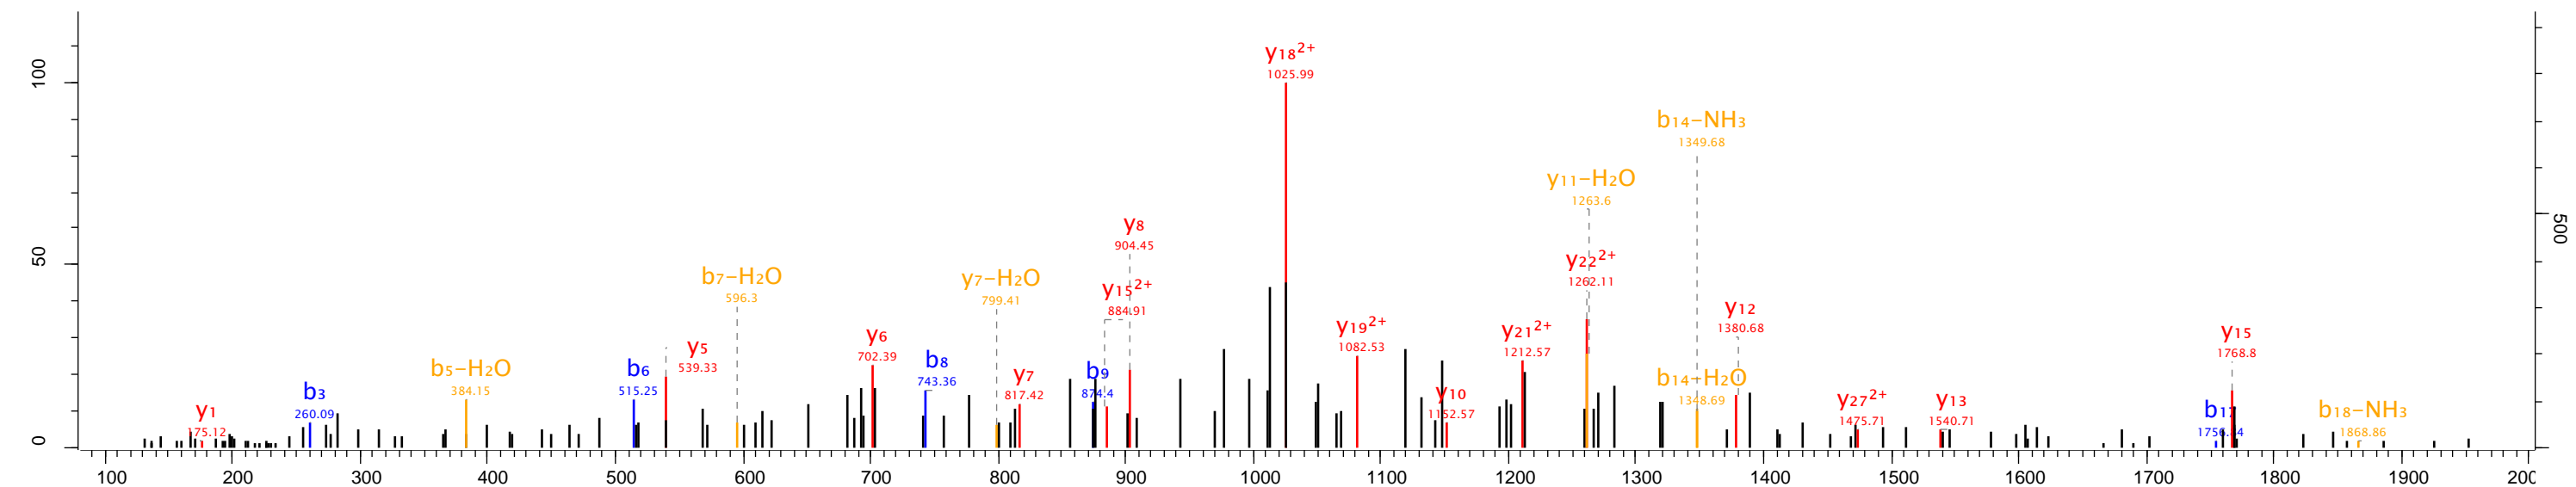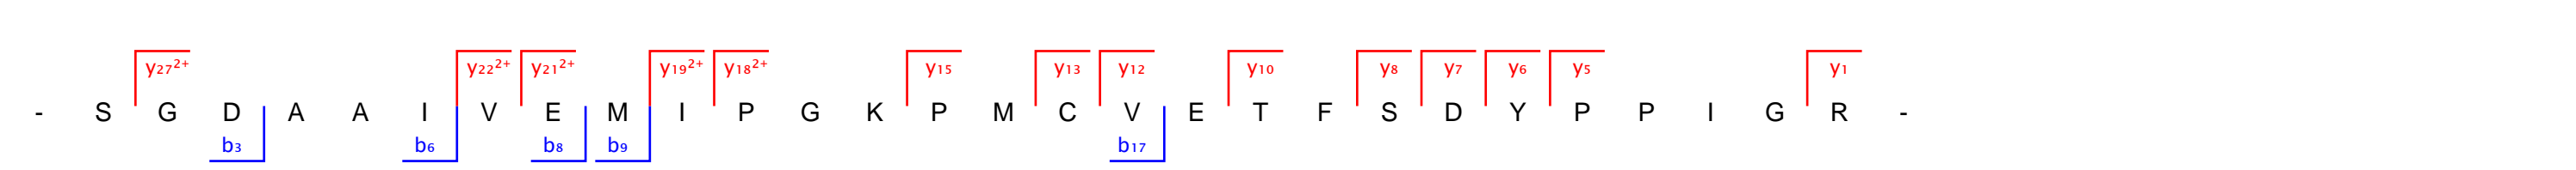

Spectral Annotation for Single-Peptide IDs between Single D11 Cells using Q-OT-LIT



Raw file: 2015-01-08\_CL03\_Blastomere-15  
 Scan: 40449 Method: ITMS; HCD Score: 43.09 m/z: 1013.82

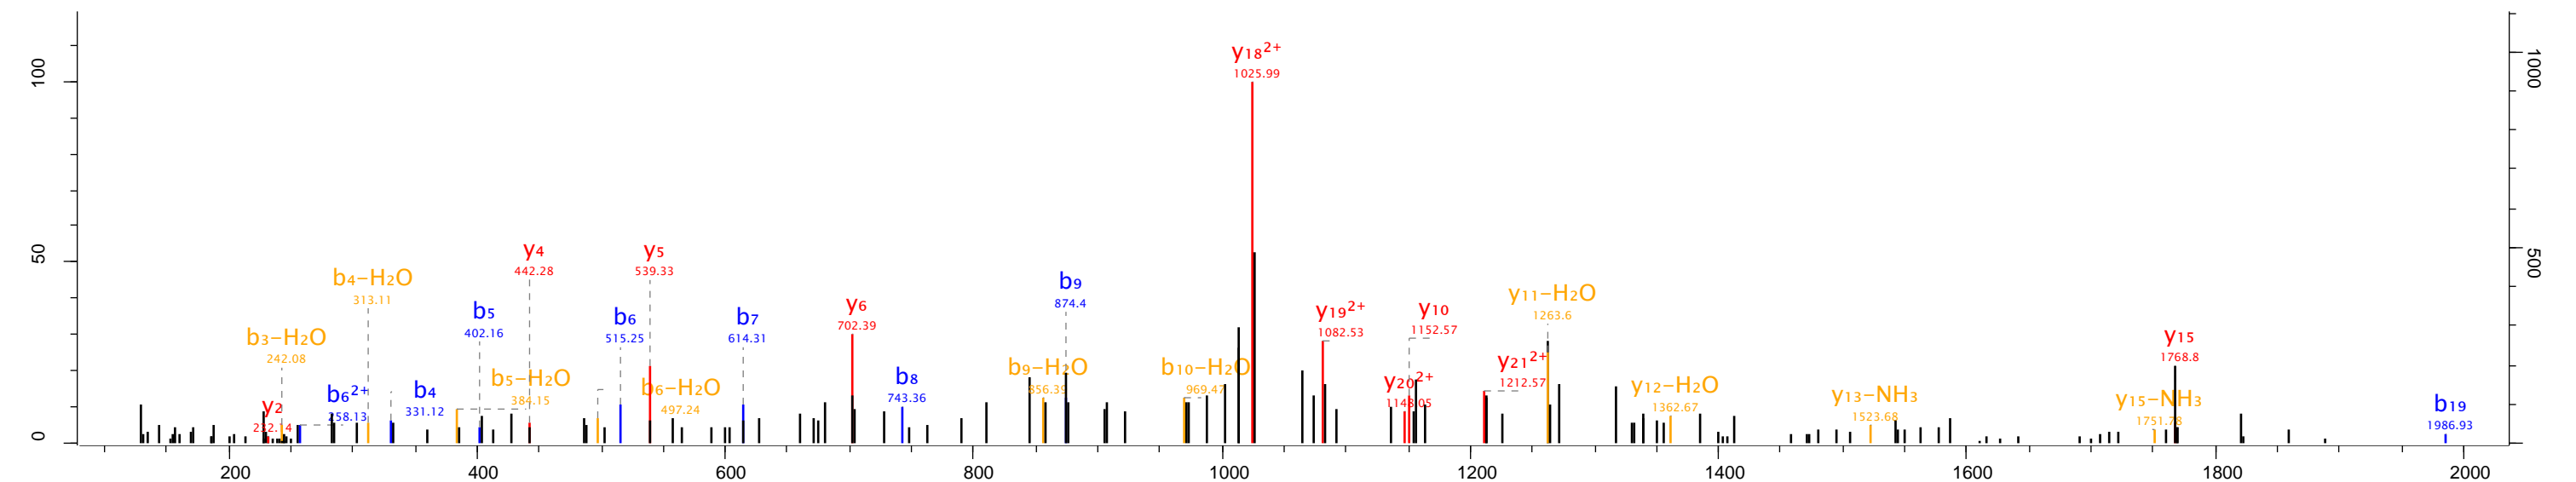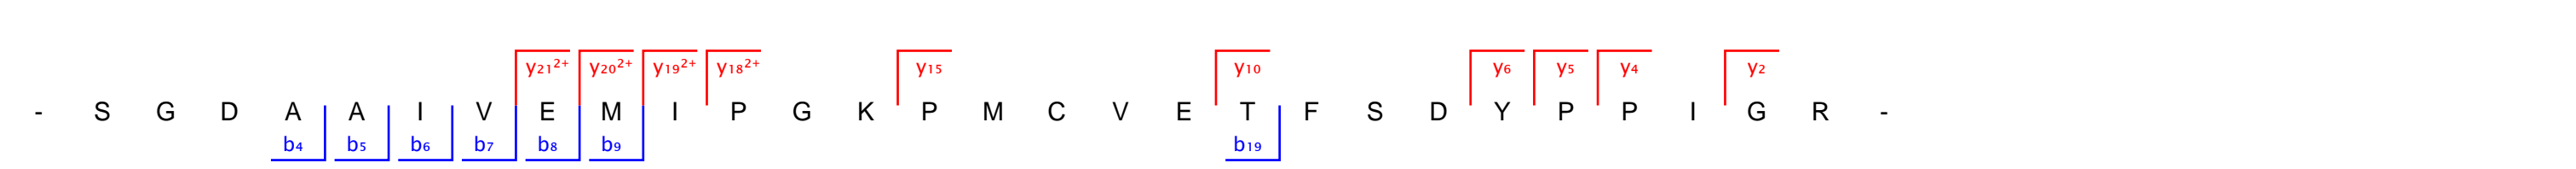

Raw file 2015-01-08\_CL03\_Blastomere-15 Scan 40503 Method ITMS; HCD Score 64.26 m/z 1013.49

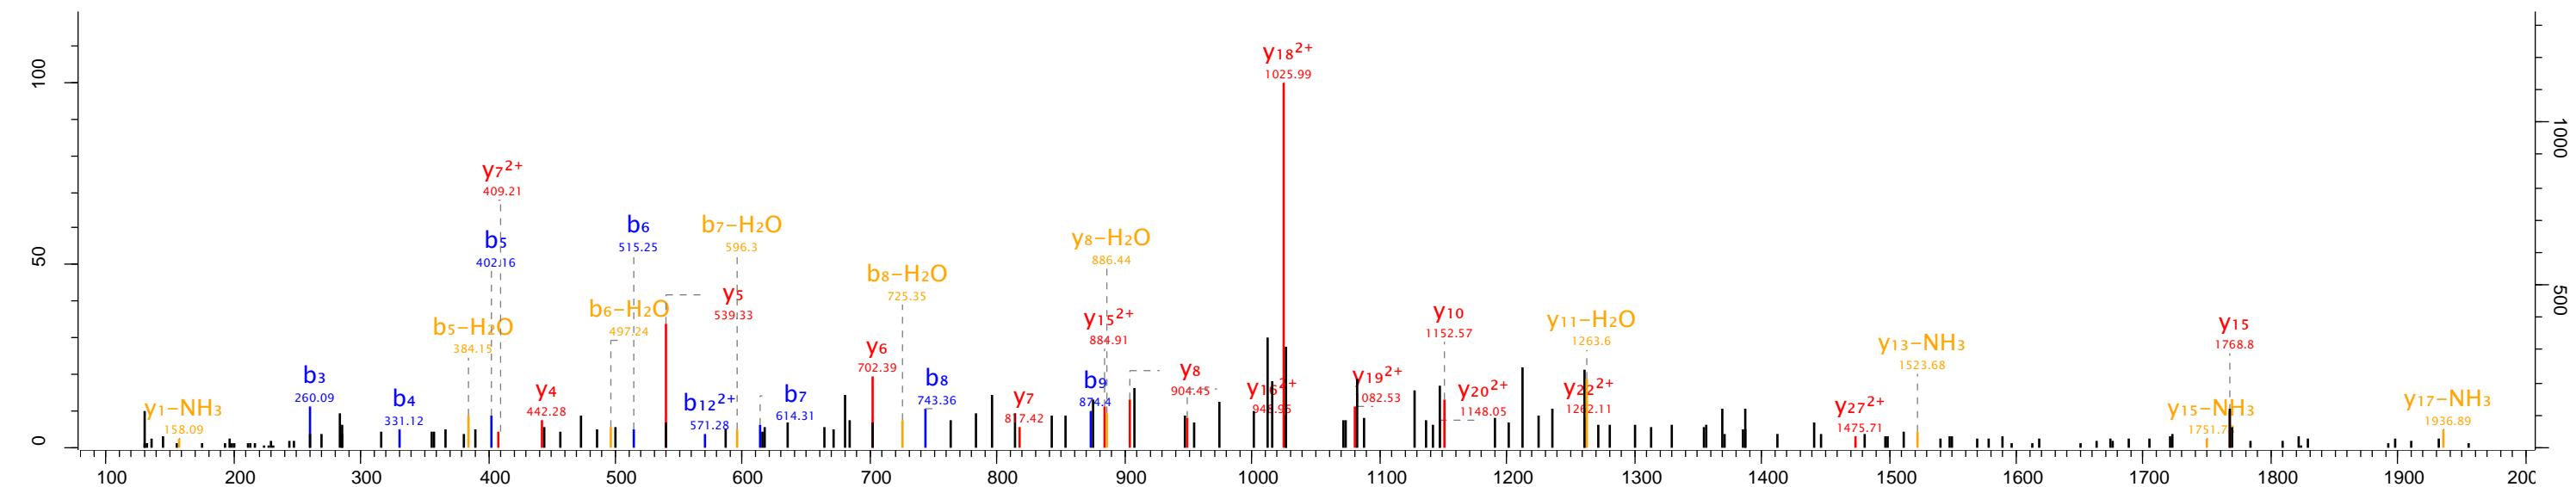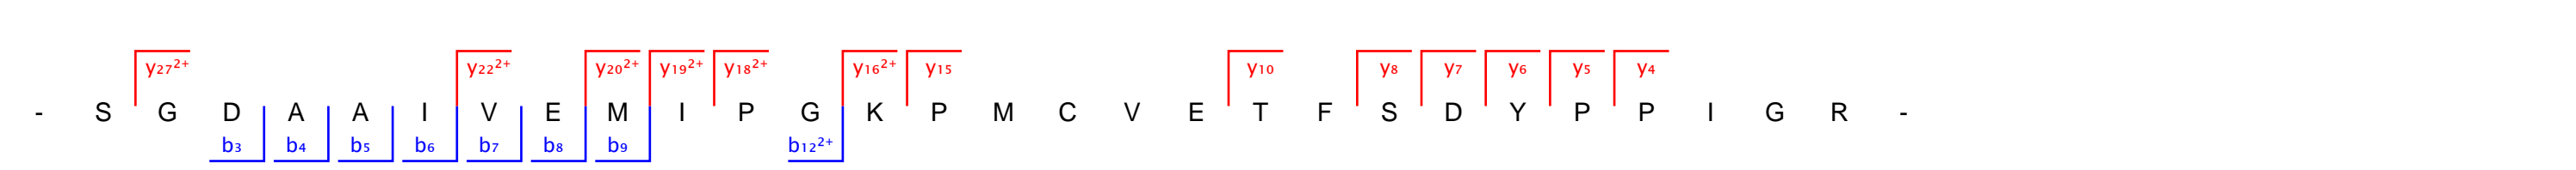

Spectral Annotation for Single-Peptide IDs between Single D11 Cells using Q-OT-LIT

Raw file 2015-01-08\_CL03\_Blastomere-15 Scan 40589 Method ITMS; HCD Score 72.32 m/z 774.43

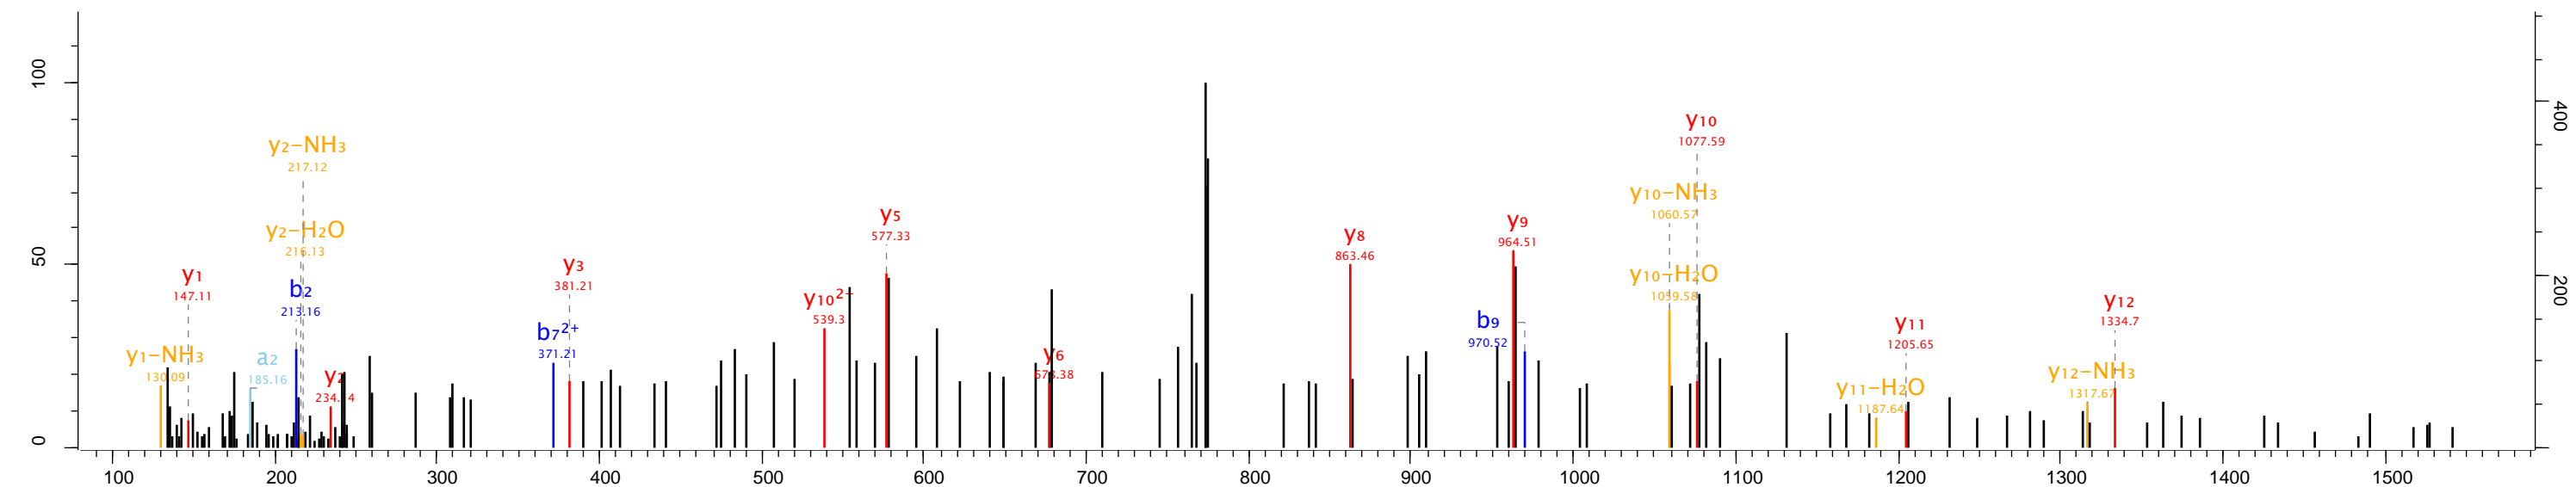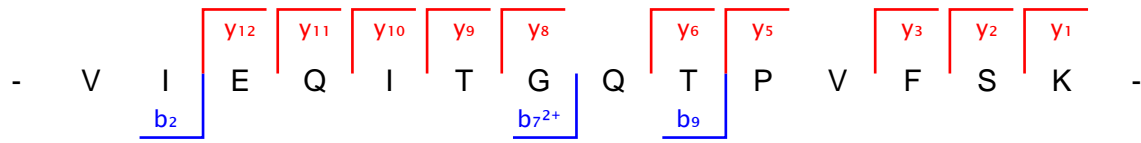

Spectral Annotation for Single-Peptide IDs between Single D11 Cells using Q-OT-LIT

Raw file 2015-01-08\_CL03\_Blastomere-15 Scan 40615 Method ITMS; HCD Score 56.29 m/z 773.93

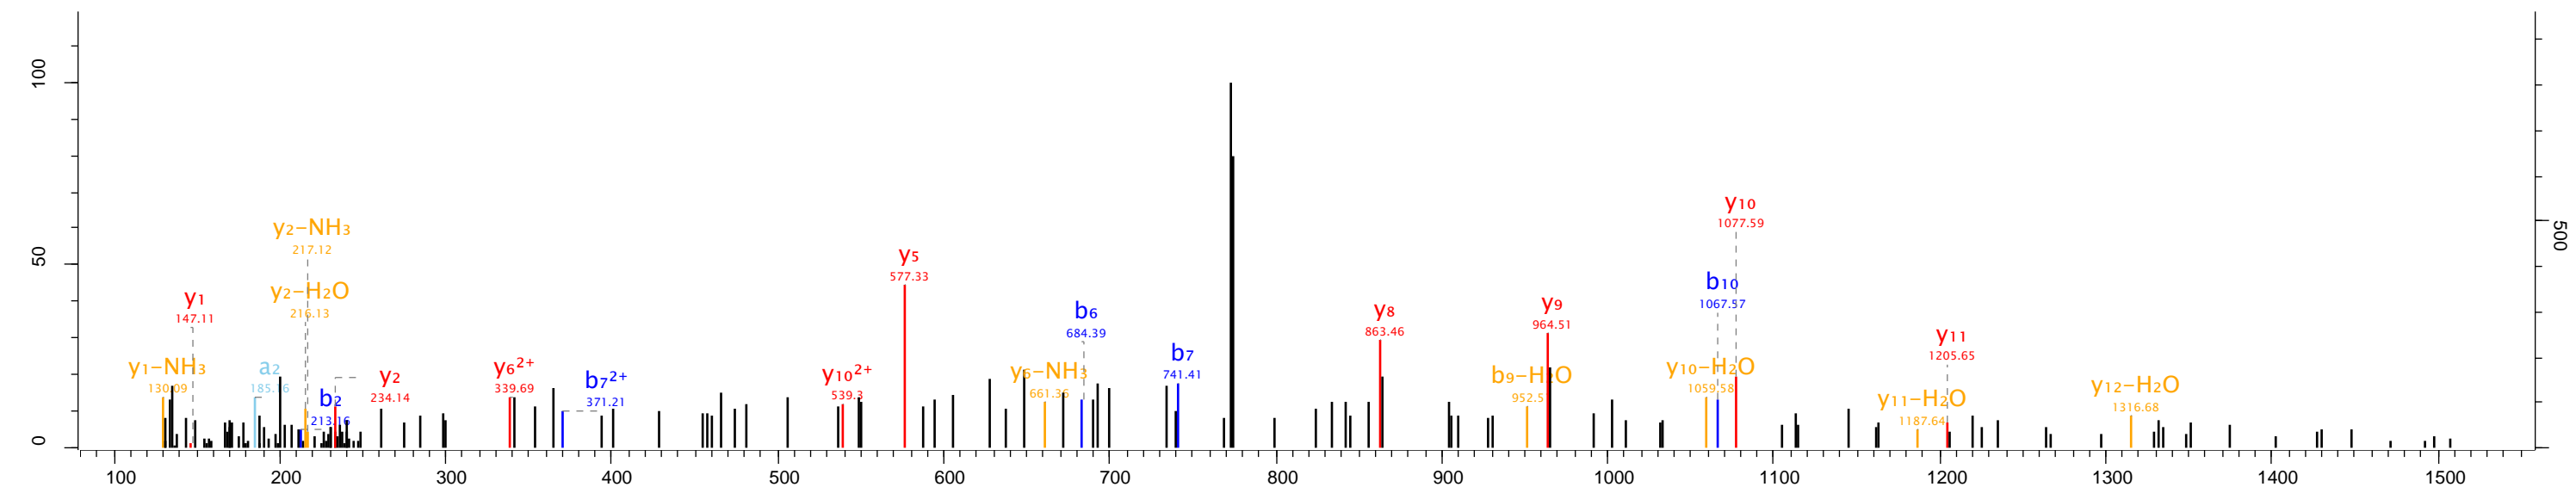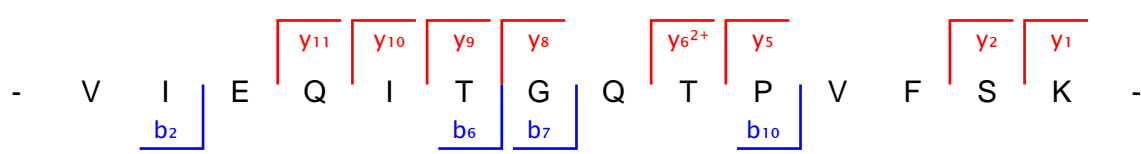

Spectral Annotation for Single-Peptide IDs between Single D11 Cells using Q-OT-LIT

Raw file: 2015-01-08\_CL03\_Blastomere-15  
 Scan: 40655 Method: ITMS; HCD Score: 47.81 m/z: 1013.48

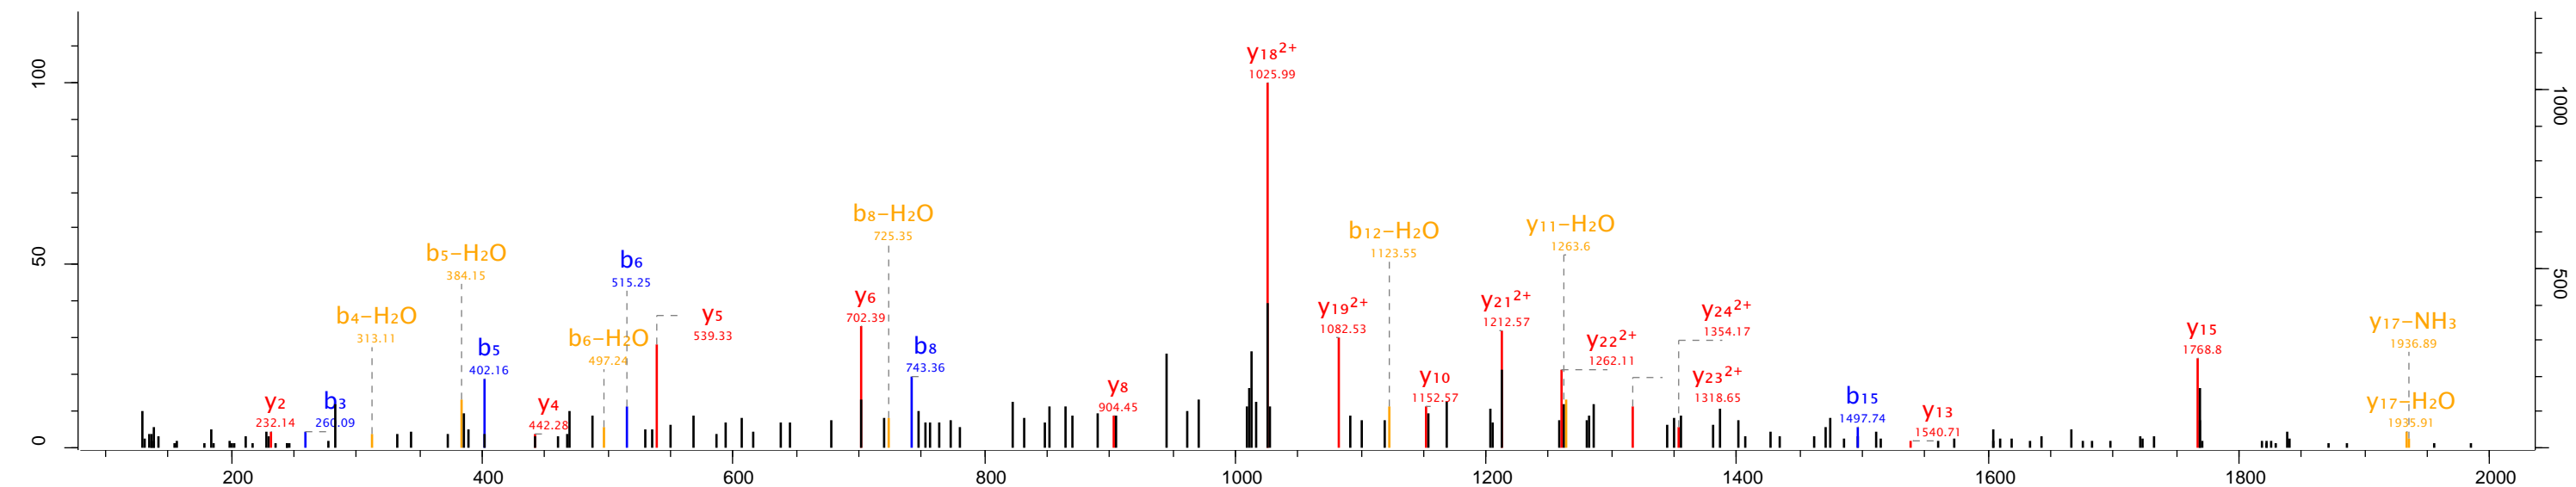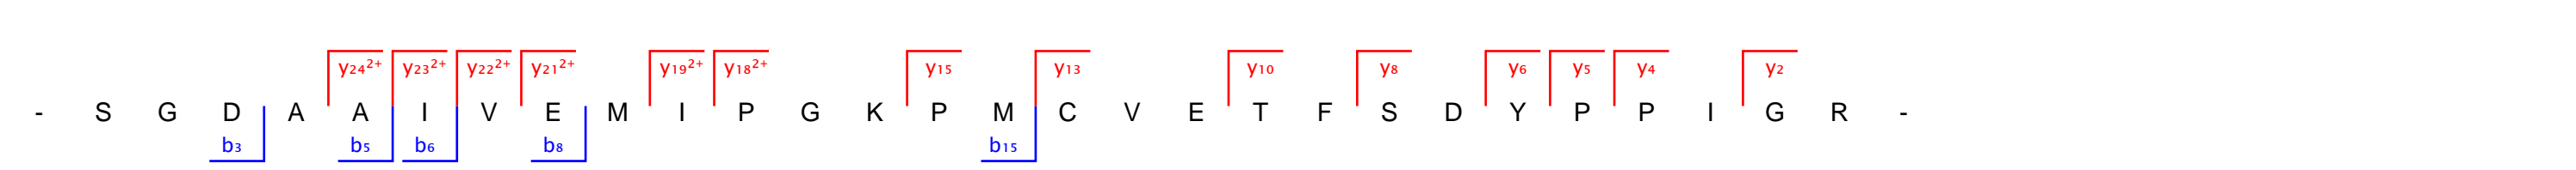

Spectral Annotation for Single-Peptide IDs between Single D11 Cells using Q-OT-LIT

Raw file 2015-01-08\_CL03\_Blastomere-15 Scan 40677 Method ITMS; HCD Score 72.32 m/z 846.43

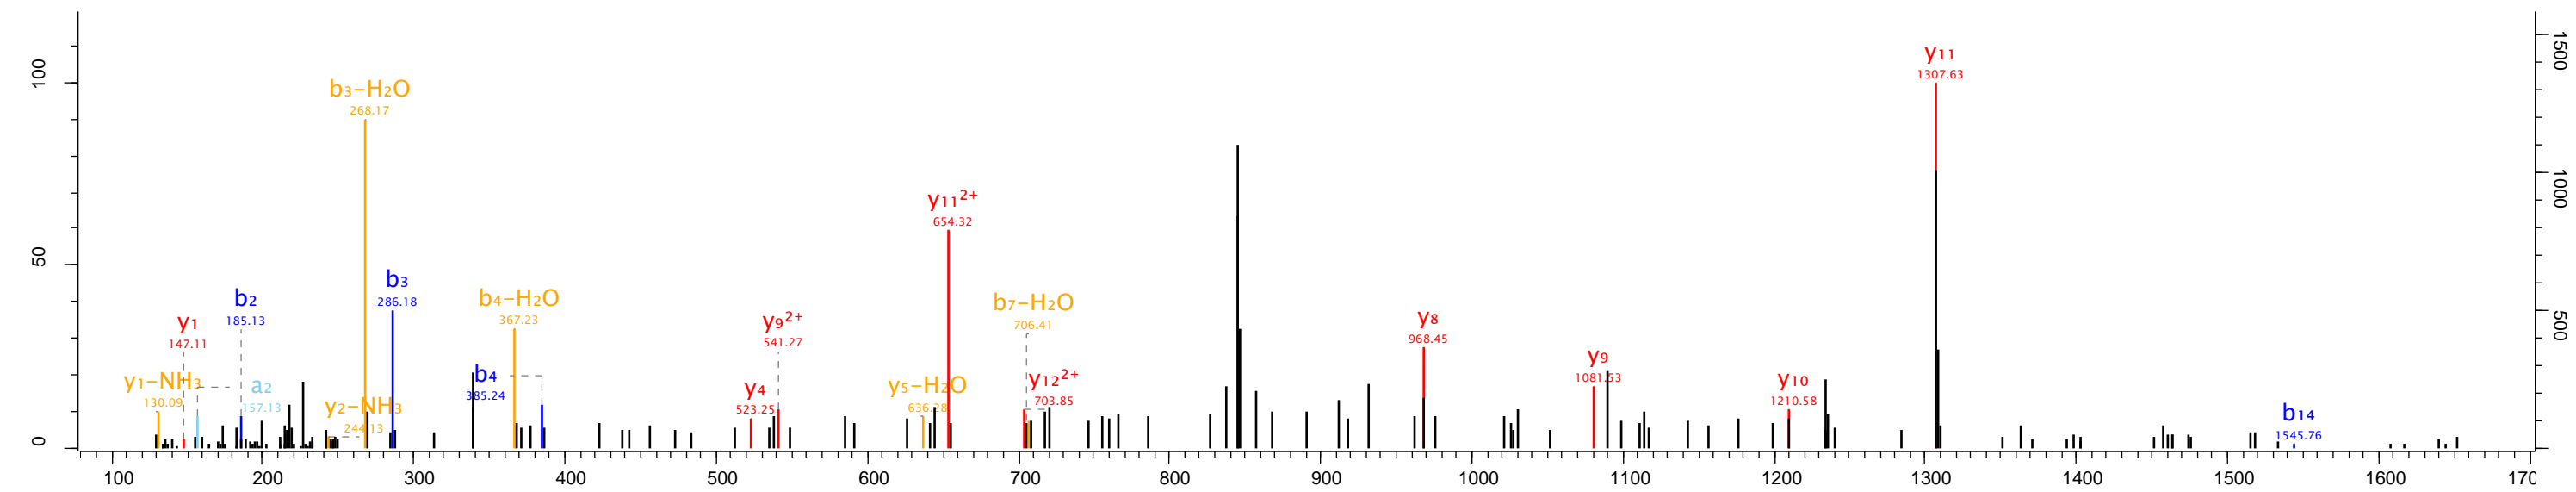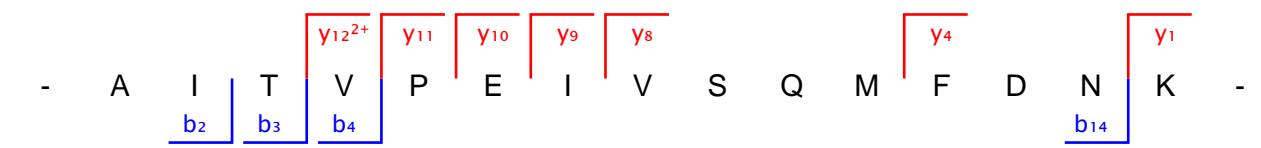

Spectral Annotation for Single-Peptide IDs between Single D11 Cells using Q-OT-LIT

Raw file 2015-01-08\_CL03\_Blastomere-15 Scan 40776 Method ITMS; HCD Score 110.55 m/z 824.91

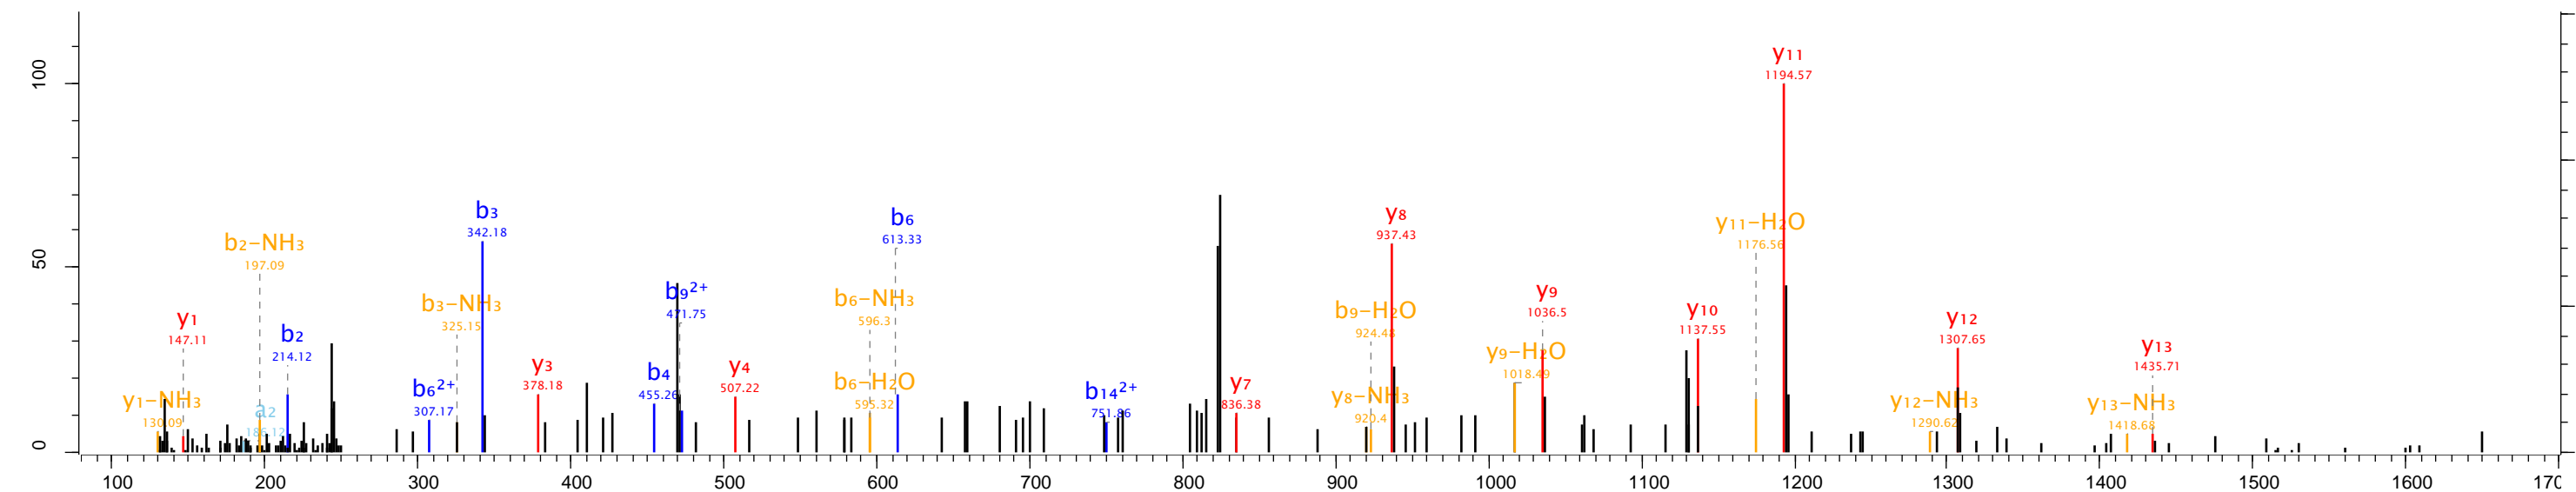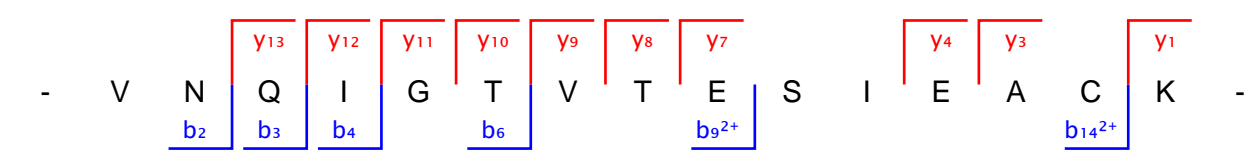

Spectral Annotation for Single-Peptide IDs between Single D11 Cells using Q-OT-LIT

Raw file 2015-01-08\_CL03\_Blastomere-15 Scan 40798 Method ITMS; HCD Score 65.5 m/z 808.91

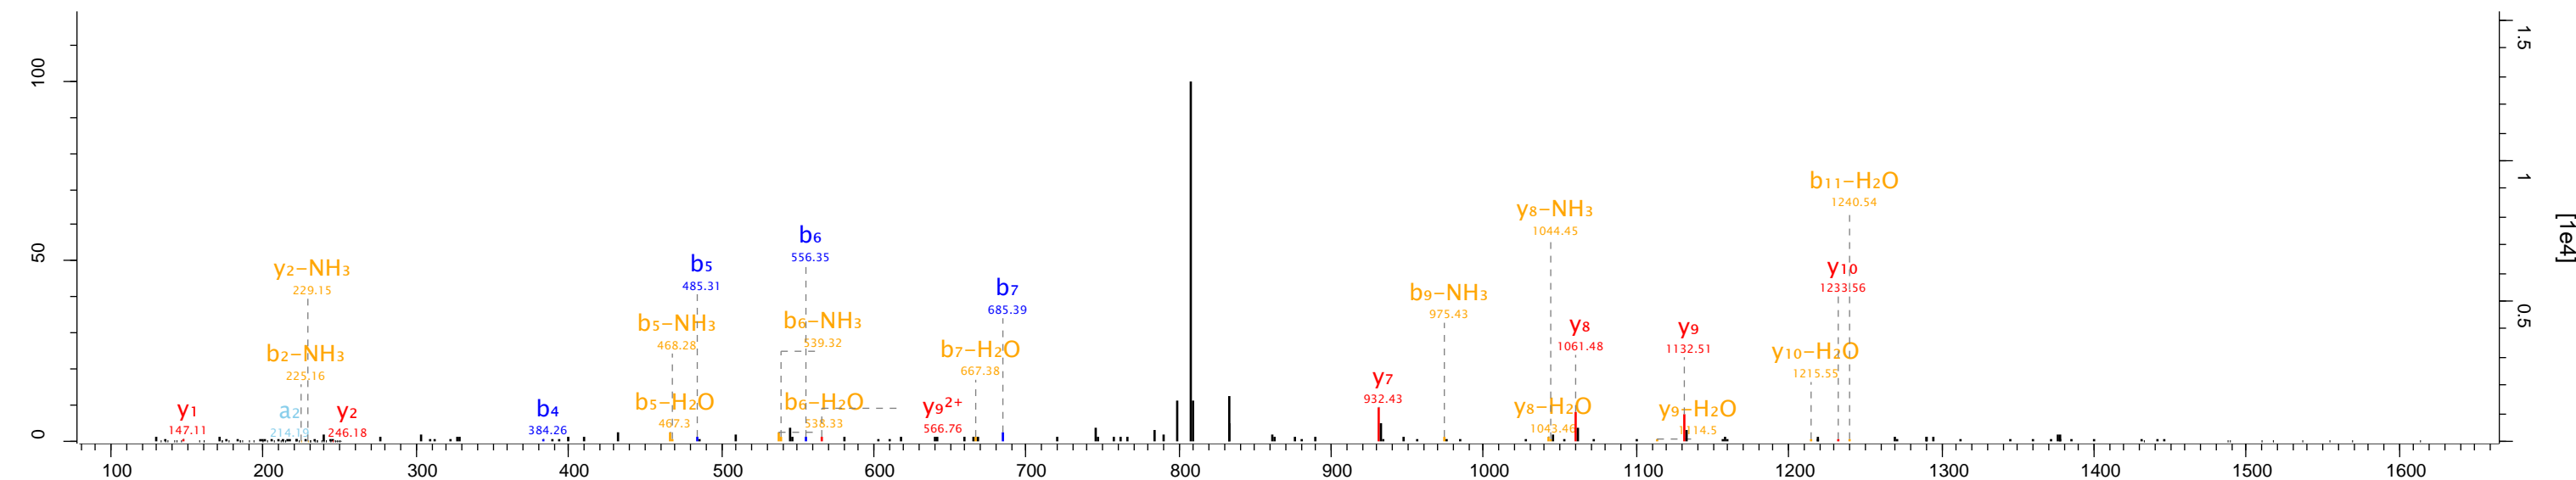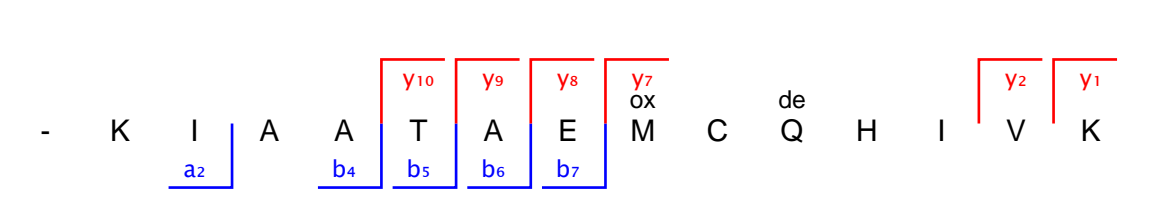

Spectral Annotation for Single-Peptide IDs between Single D11 Cells using Q-OT-LIT



Raw file 2015-01-08\_CL03\_Blastomere-15 Scan 40861 Method ITMS; HCD Score 73.83 m/z 597.63

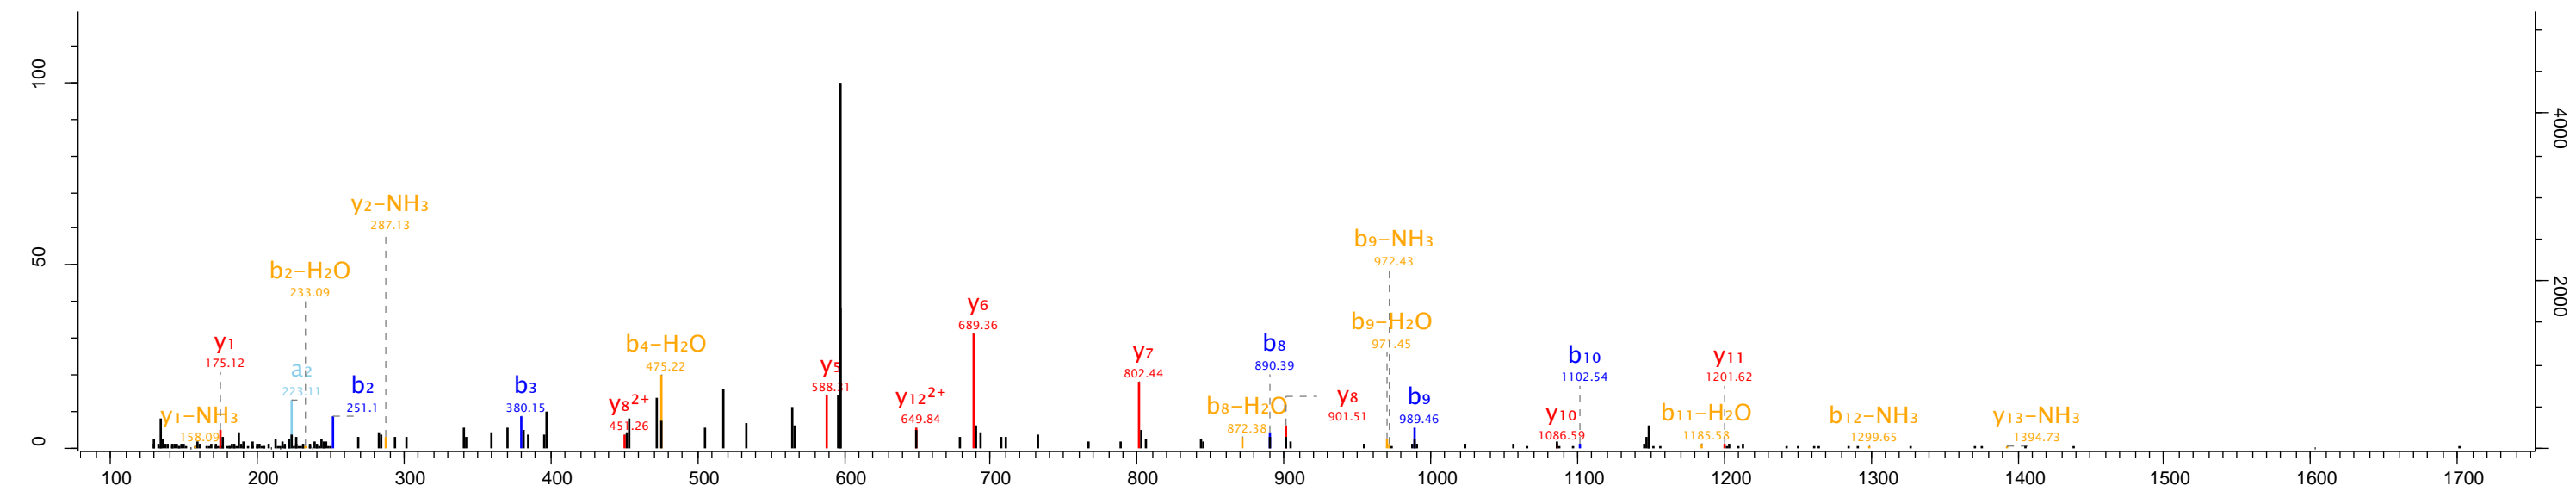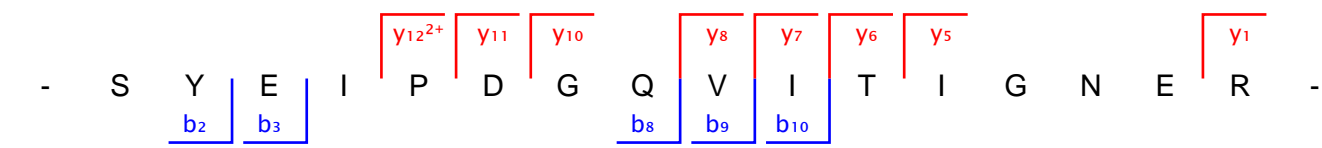

Spectral Annotation for Single-Peptide IDs between Single D11 Cells using Q-OT-LIT

Raw file 2015-01-08\_CL03\_Blastomere-15 Scan 40879 Method ITMS; HCD Score 29.13 m/z 1013.49

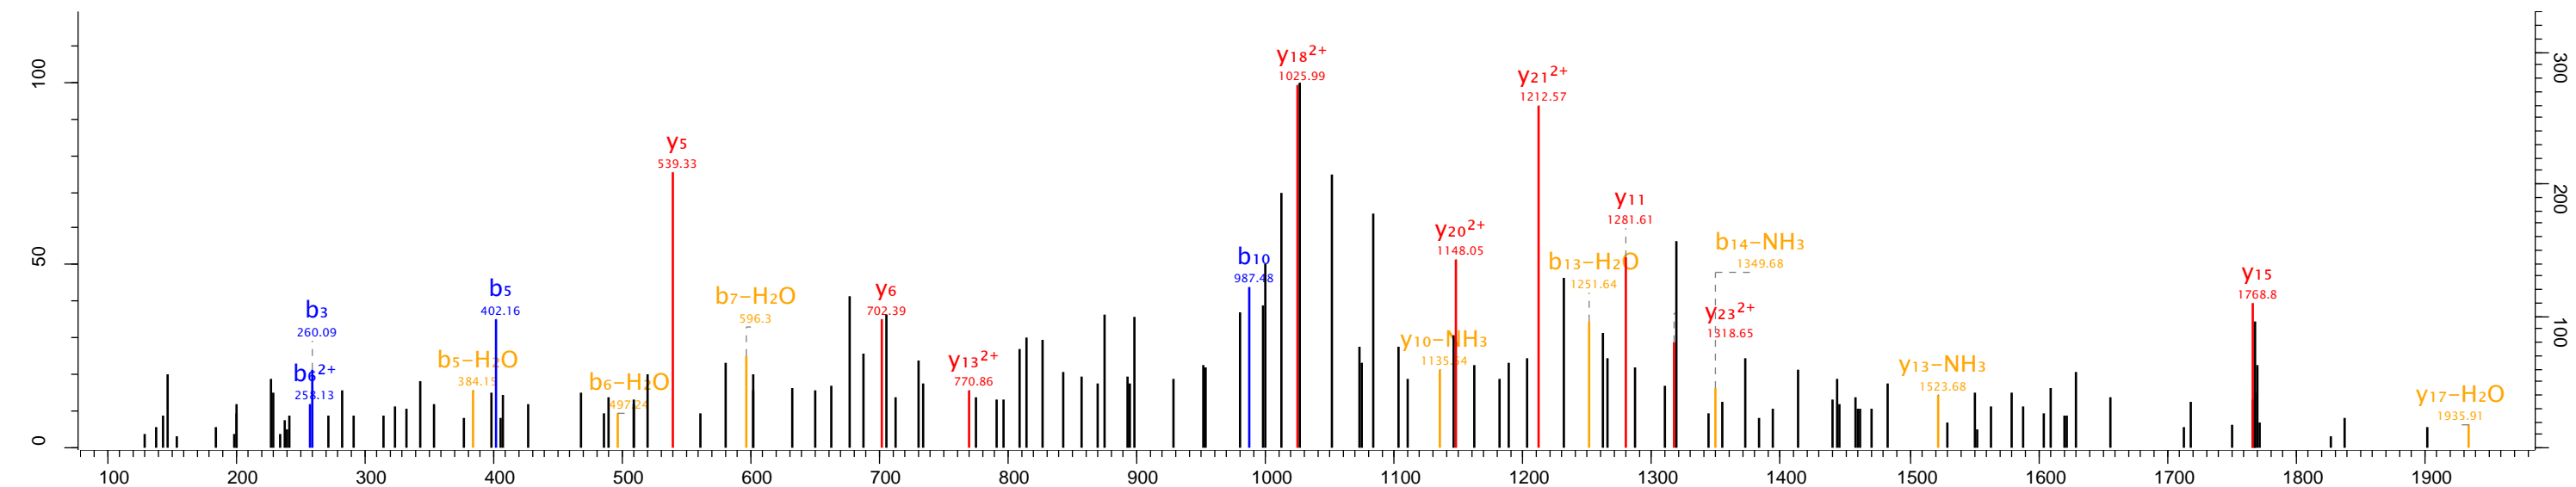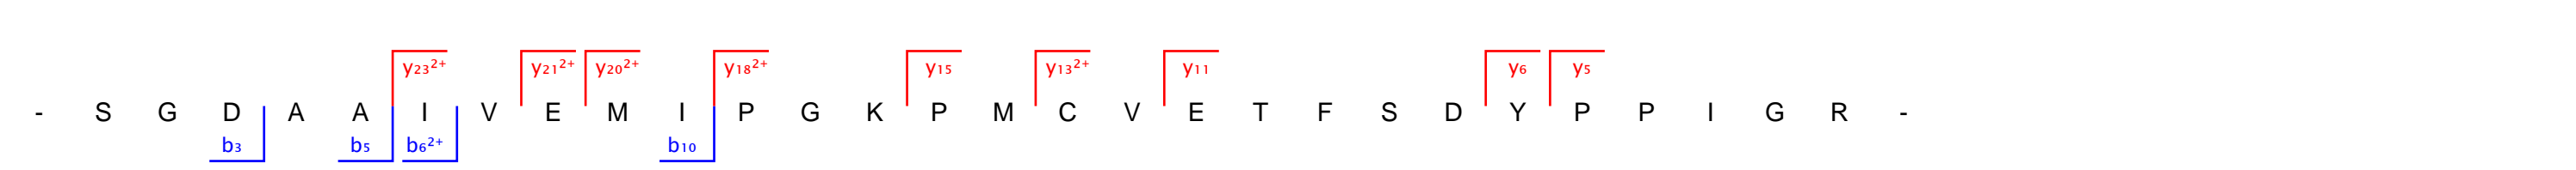

Raw file 2015-01-08\_CL03\_Blastomere-15 Scan 41043 Method ITMS; HCD Score 128.82 m/z 896.45

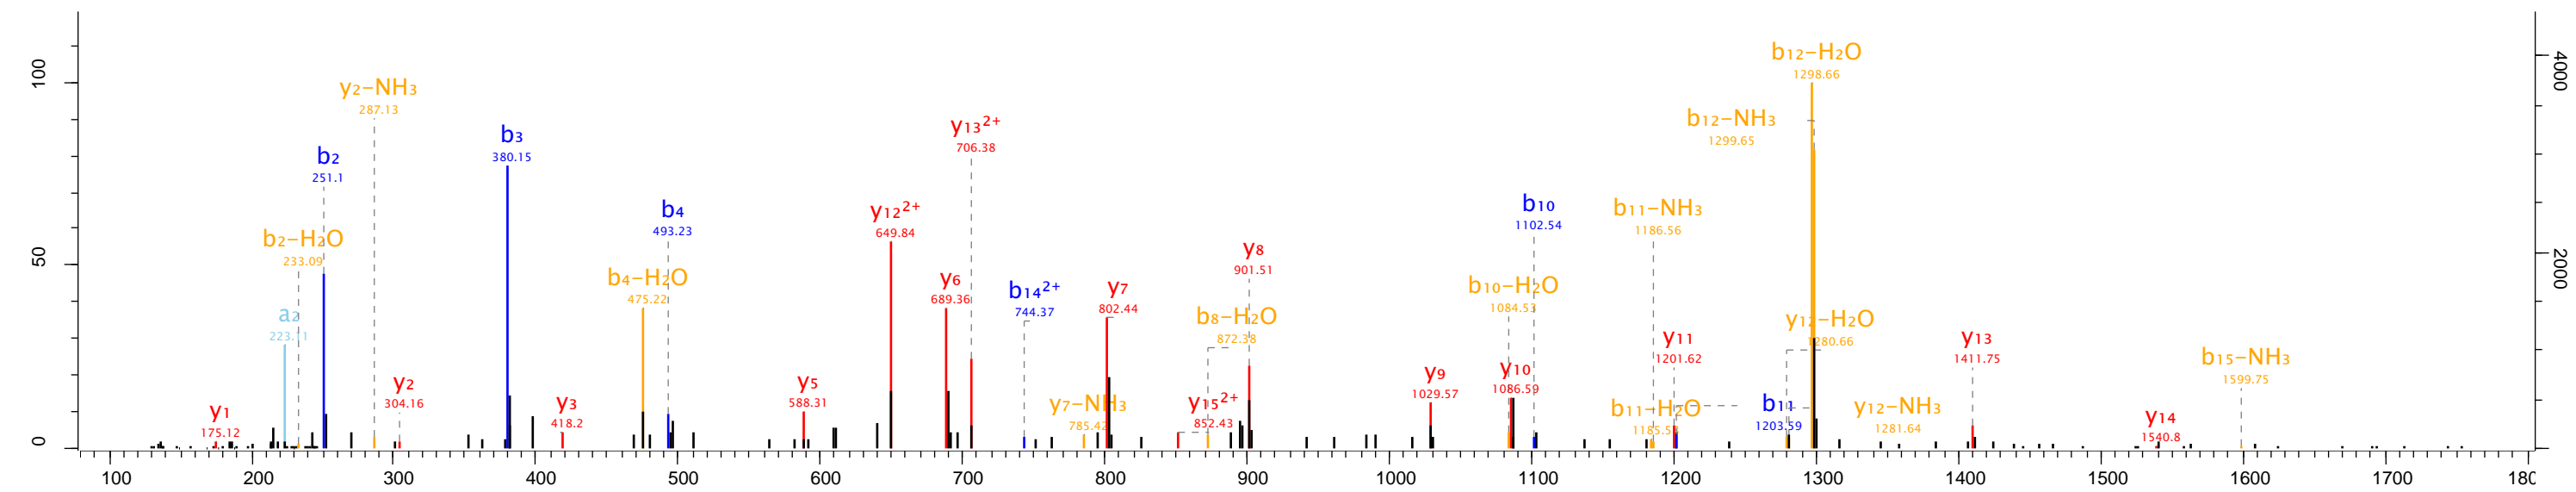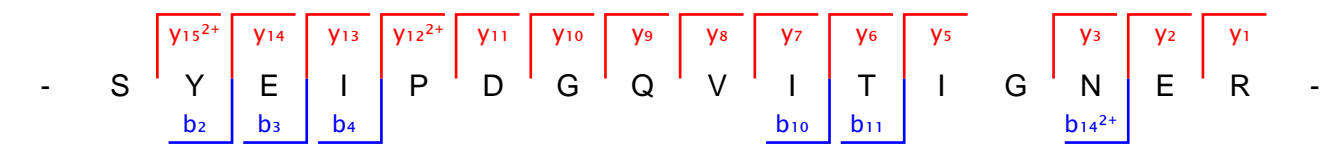

Spectral Annotation for Single-Peptide IDs between Single D11 Cells using Q-OT-LIT

Raw file 2015-01-08\_CL03\_Blastomere-15 Scan 41058 Method ITMS; HCD Score 119.92 m/z 895.95

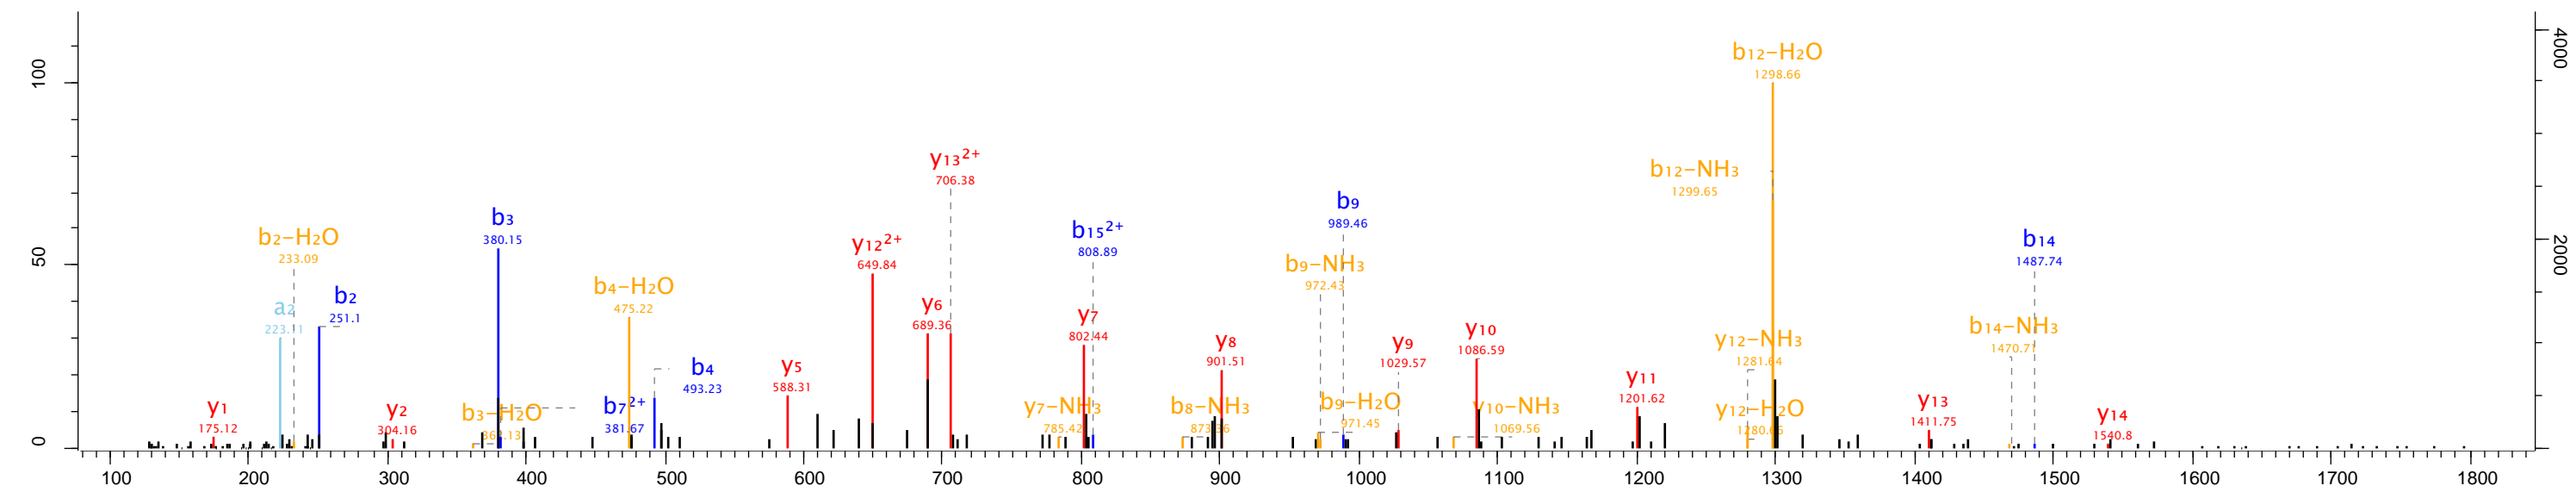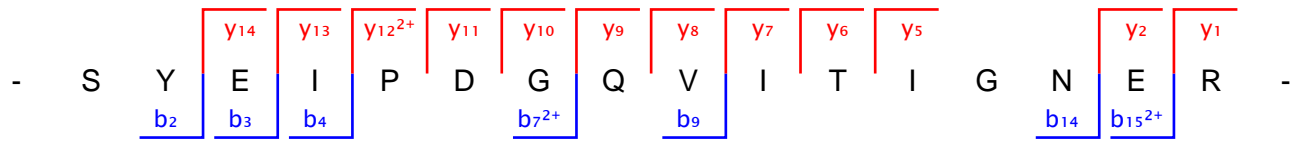

Spectral Annotation for Single-Peptide IDs between Single D11 Cells using Q-OT-LIT

Raw file 2015-01-08\_CL03\_Blastomere-15 Scan 41067 Method ITMS; HCD Score 57.41 m/z 808.91

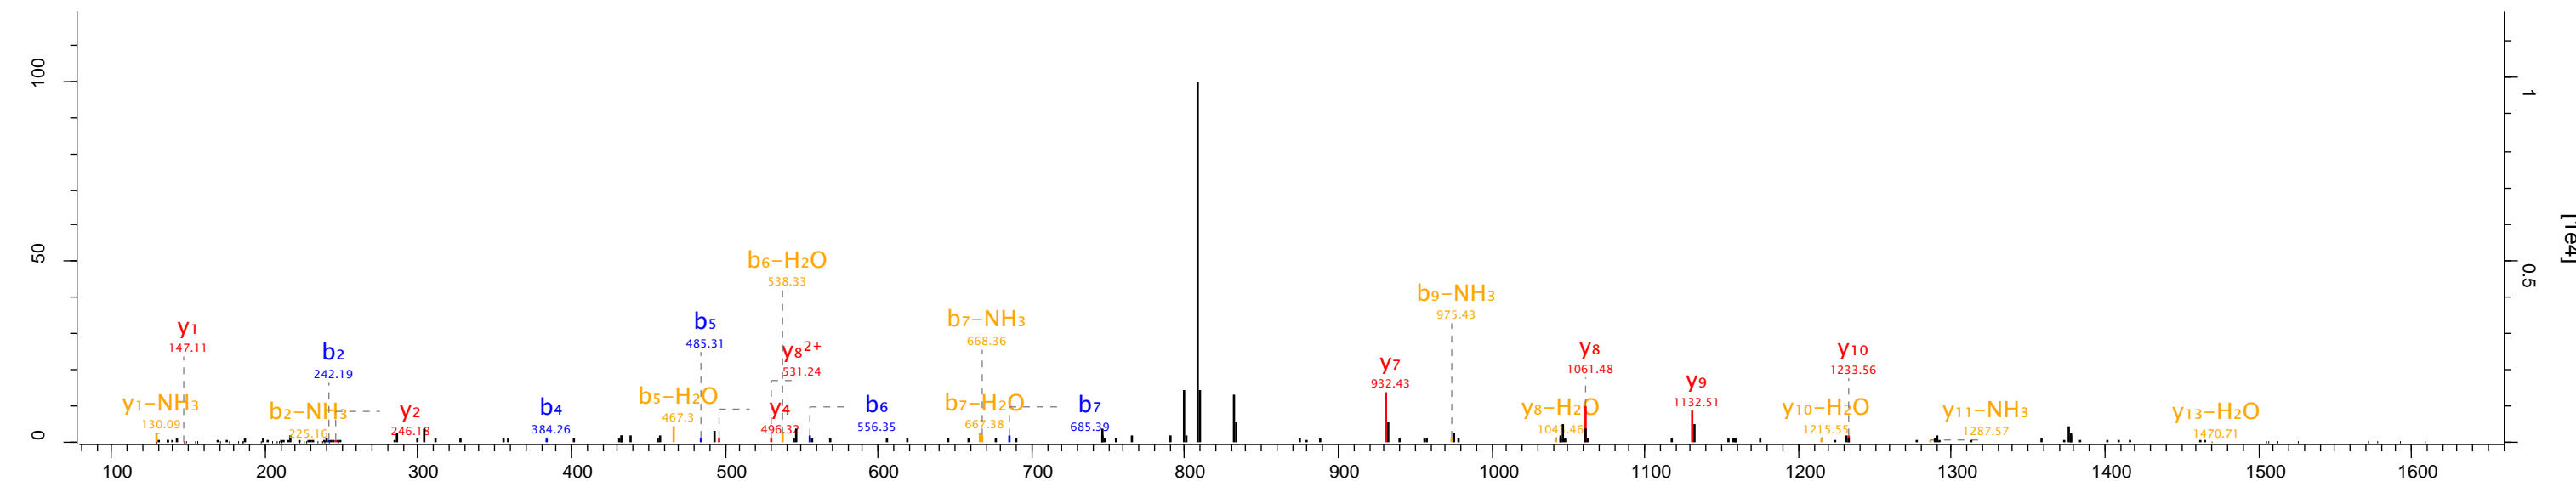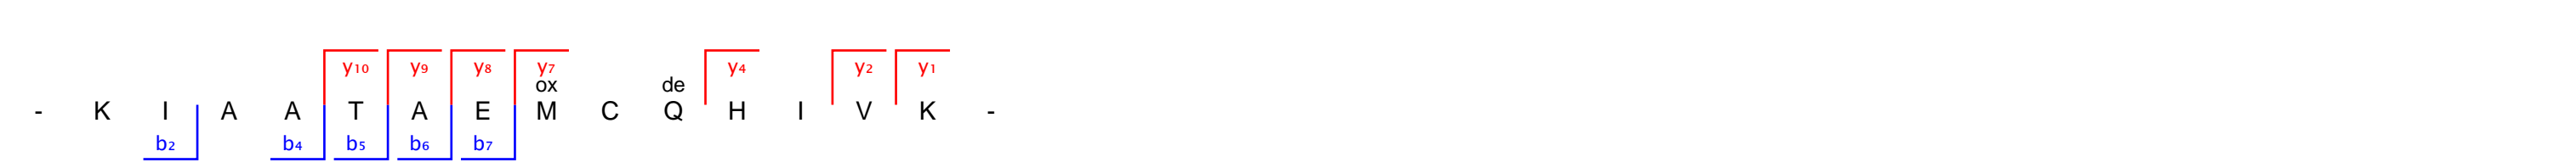

Spectral Annotation for Single-Peptide IDs between Single D11 Cells using Q-OT-LIT

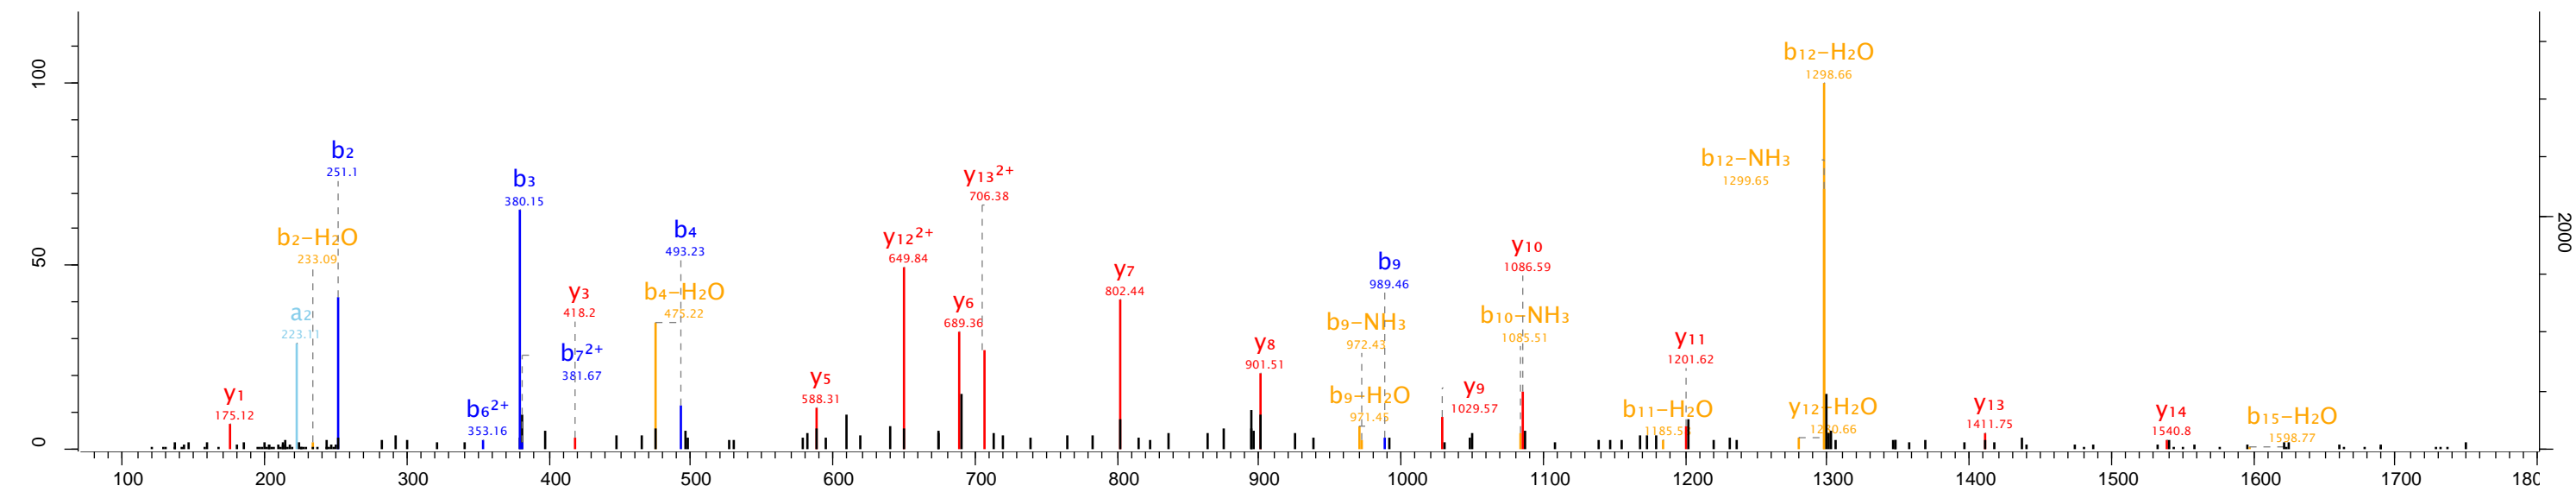

- S Y E I P D G Q V I T I G N E R -

Fragmentation mapping: b2 (E), b3 (E), b4 (I), b6<sup>2+</sup> (D), b7<sup>2+</sup> (D), b9 (V), y1 (R), y3 (N), y5 (I), y6 (T), y7 (I), y8 (V), y9 (Q), y10 (G), y11 (D), y12<sup>2+</sup> (P), y13 (I), y14 (E).

Raw file 2015-01-08\_CL03\_Blastomere-15 Scan 41121 Method ITMS; HCD Score 57.17 m/z 597.63

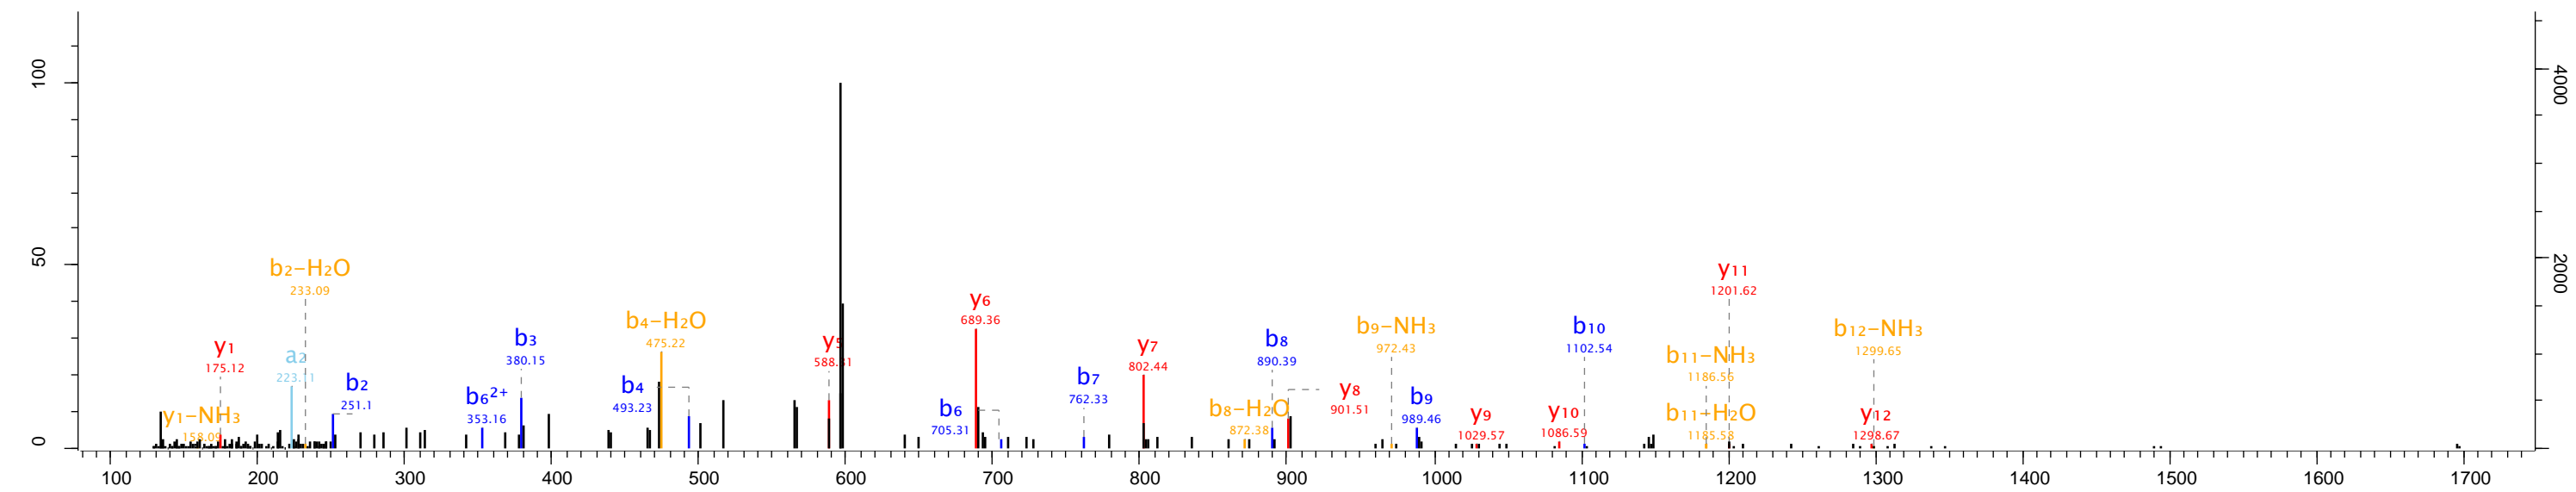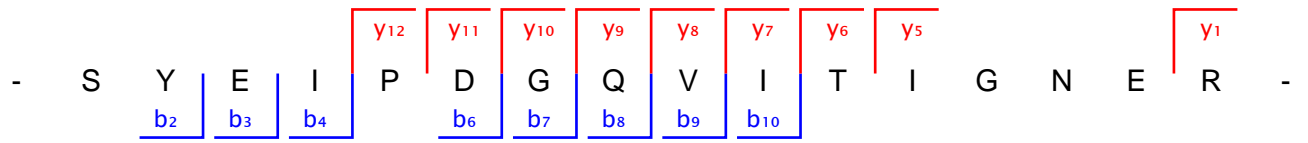

Spectral Annotation for Single-Peptide IDs between Single D11 Cells using Q-OT-LIT

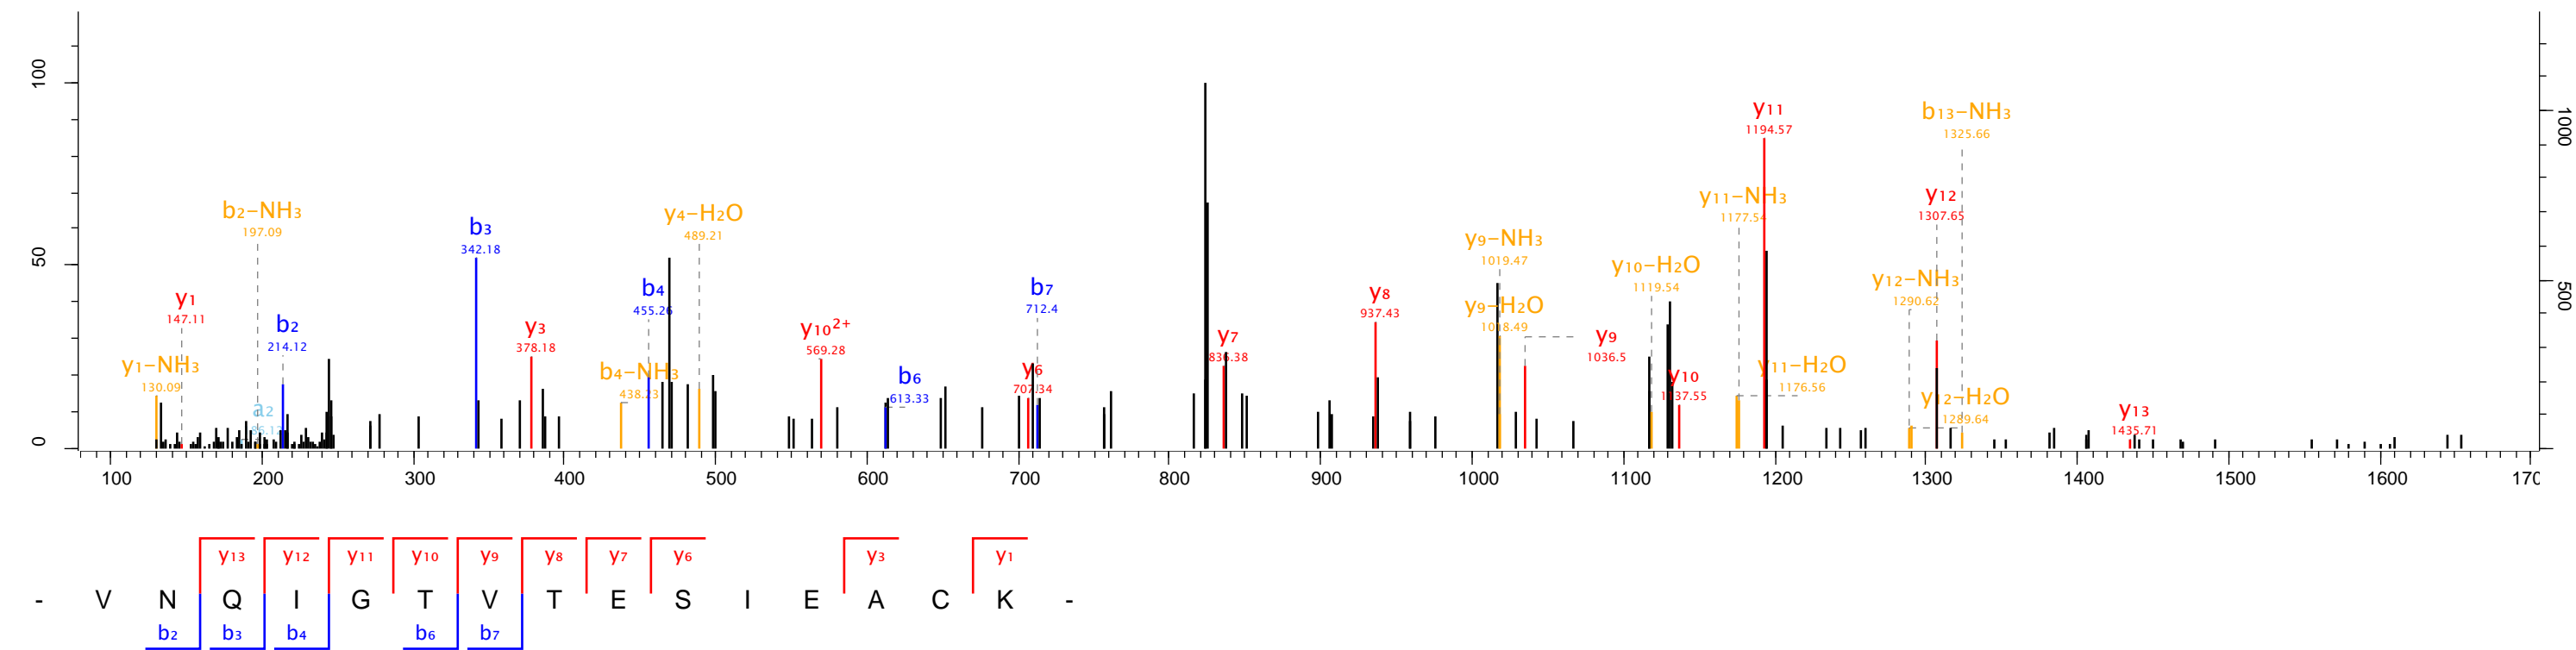



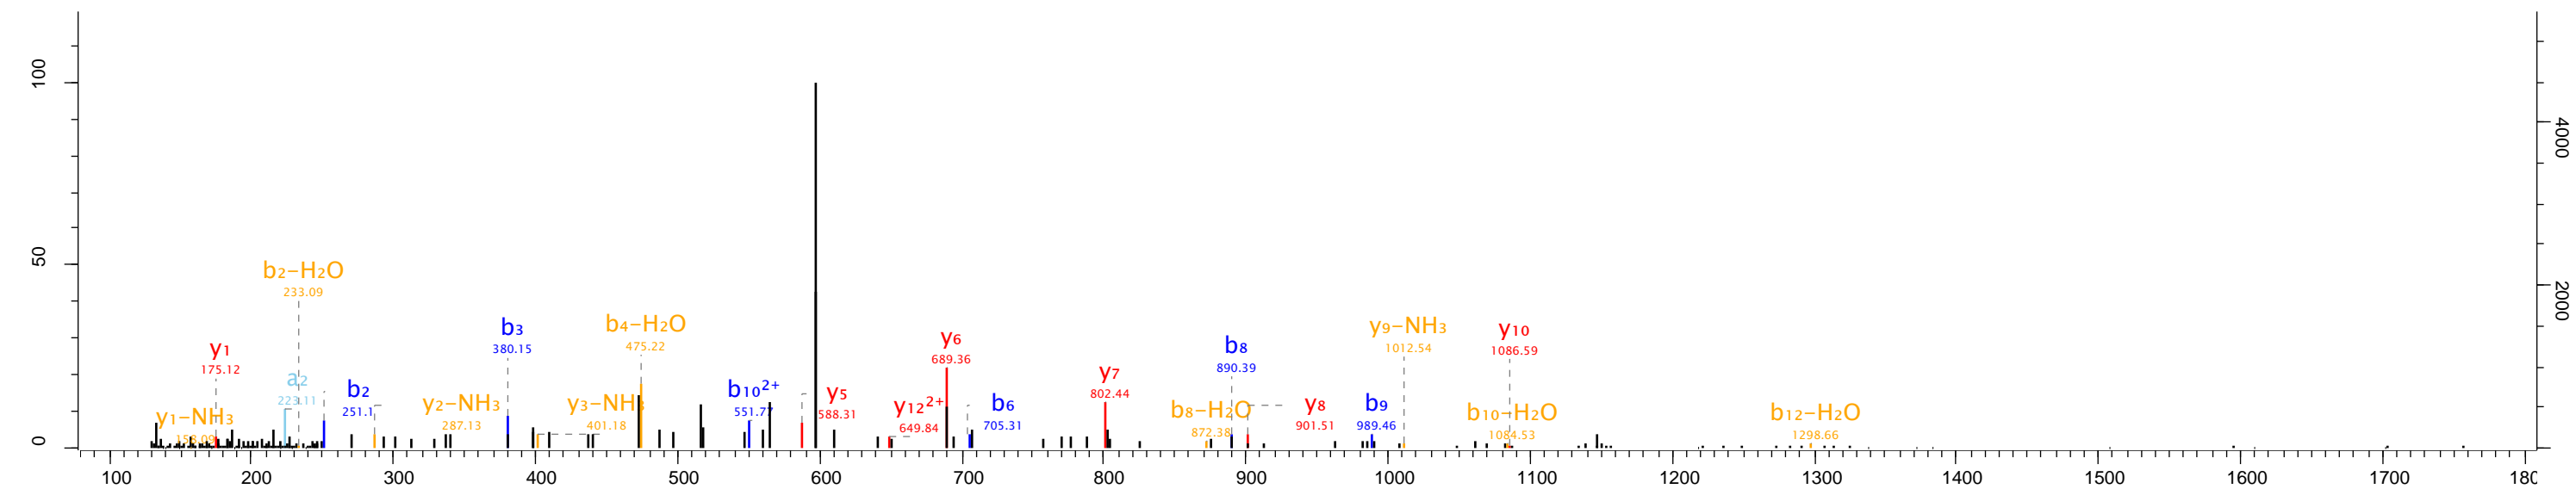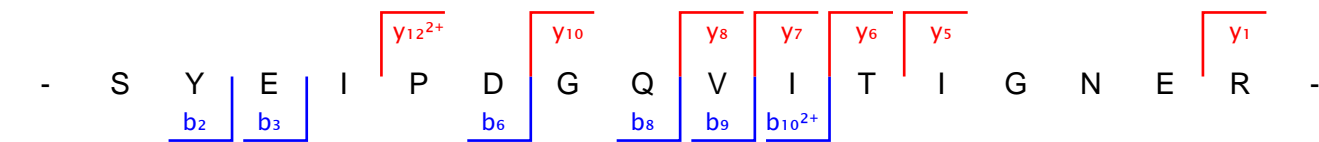

Raw file 2015-01-08\_CL03\_Blastomere-15 Scan 41148 Method ITMS; HCD Score 60.31 m/z 597.63

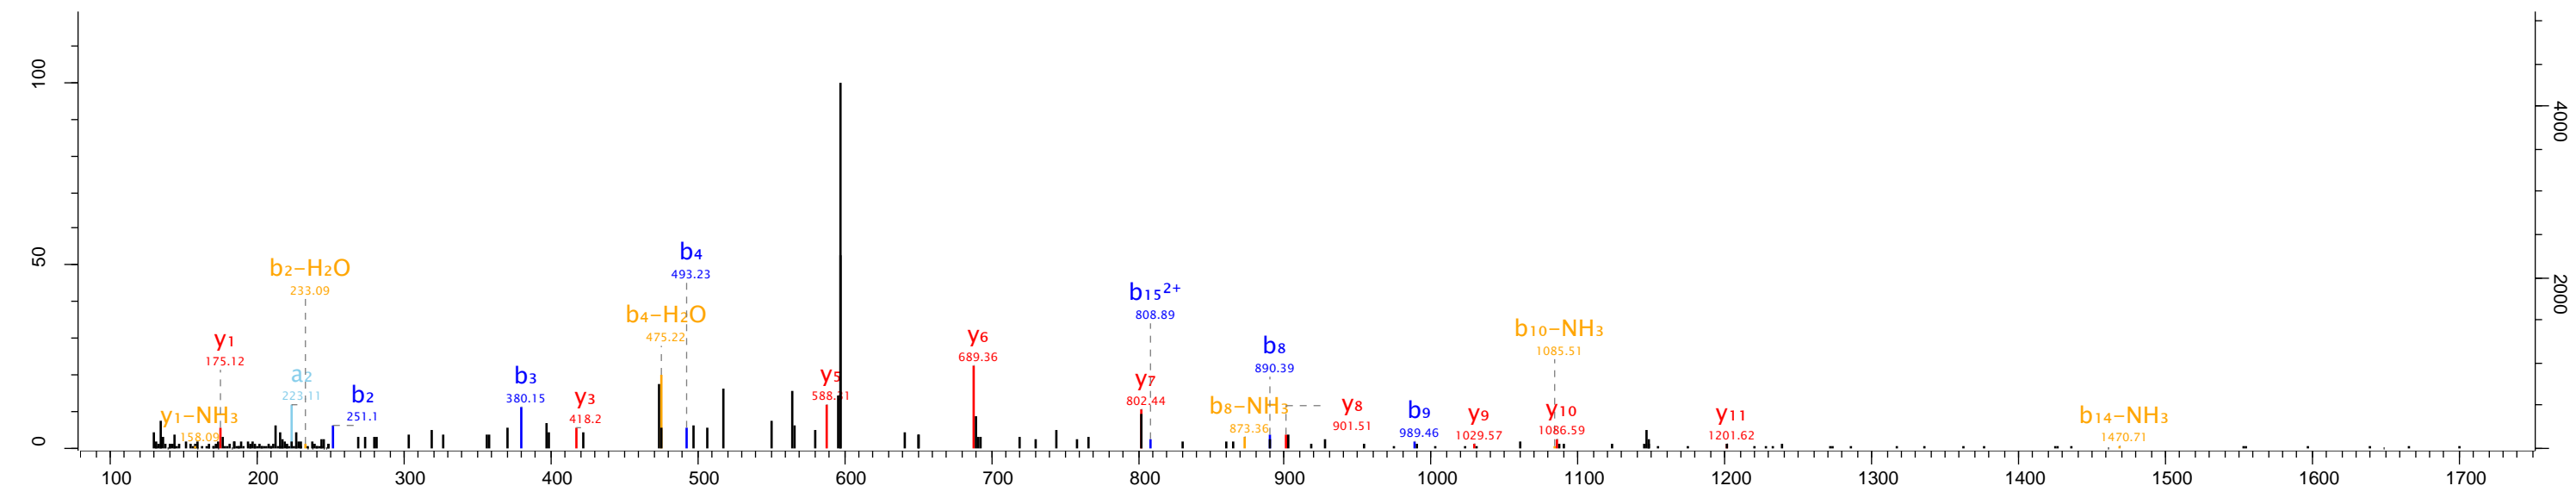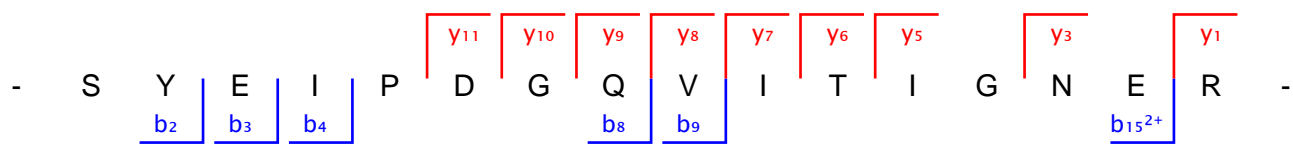

Spectral Annotation for Single-Peptide IDs between Single D11 Cells using Q-OT-LIT

Raw file 2015-01-08\_CL03\_Blastomere-15 Scan 41183 Method ITMS; HCD Score 40.24 m/z 550.28

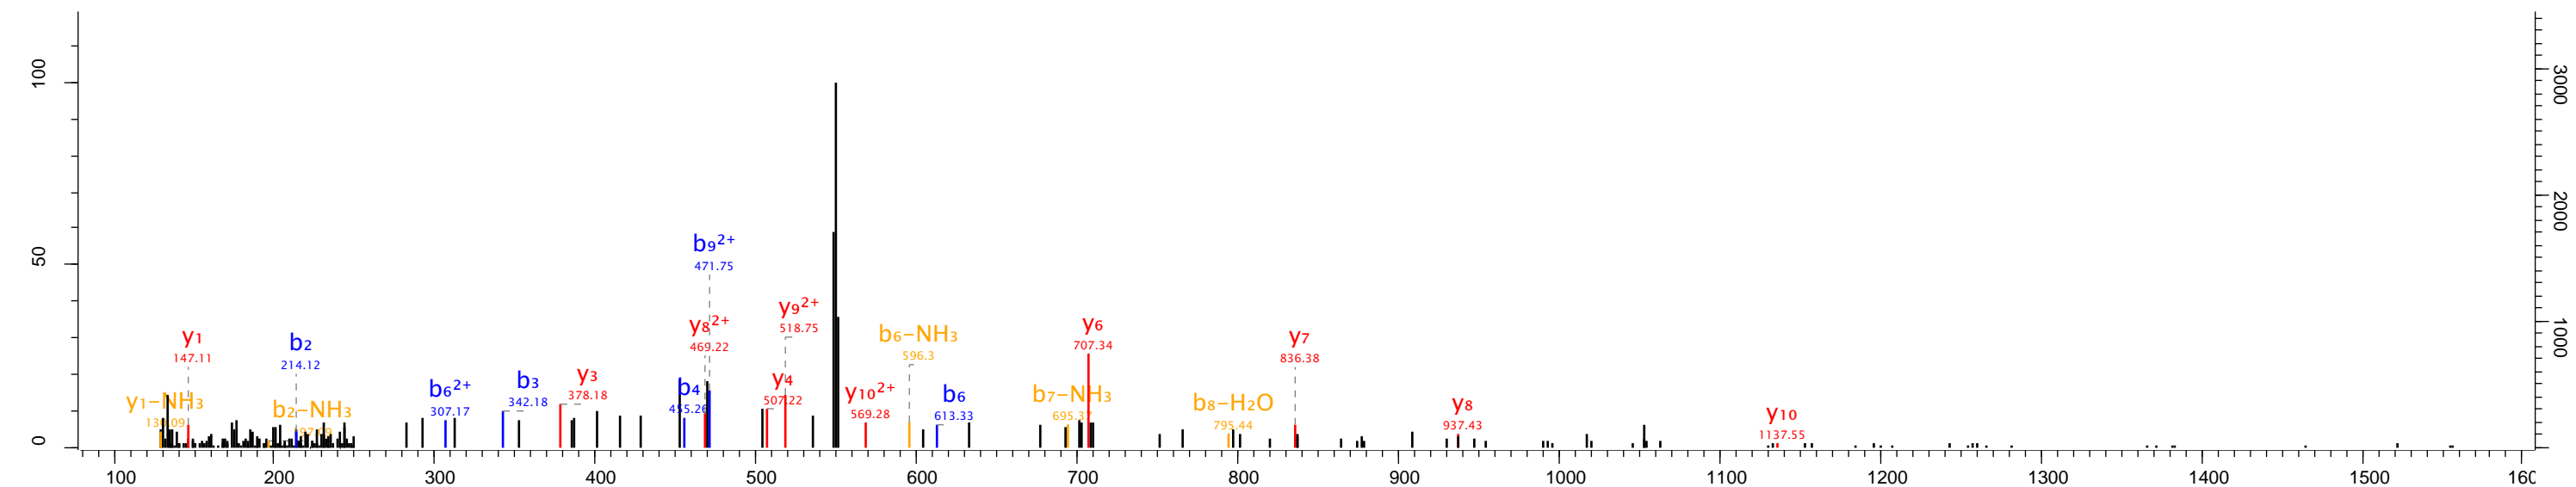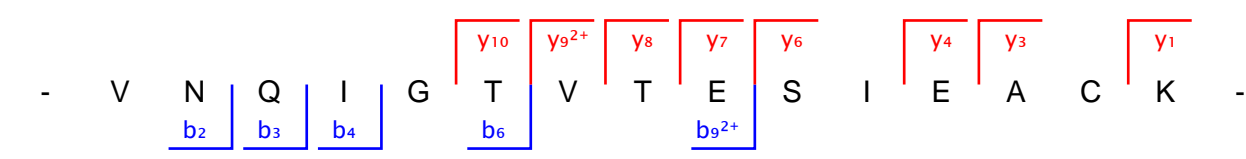

Raw file  
 2015-01-08\_CL03\_Blastomere-15  
 Scan 41195 Method ITMS; HCD Score 52.86 m/z 842.95

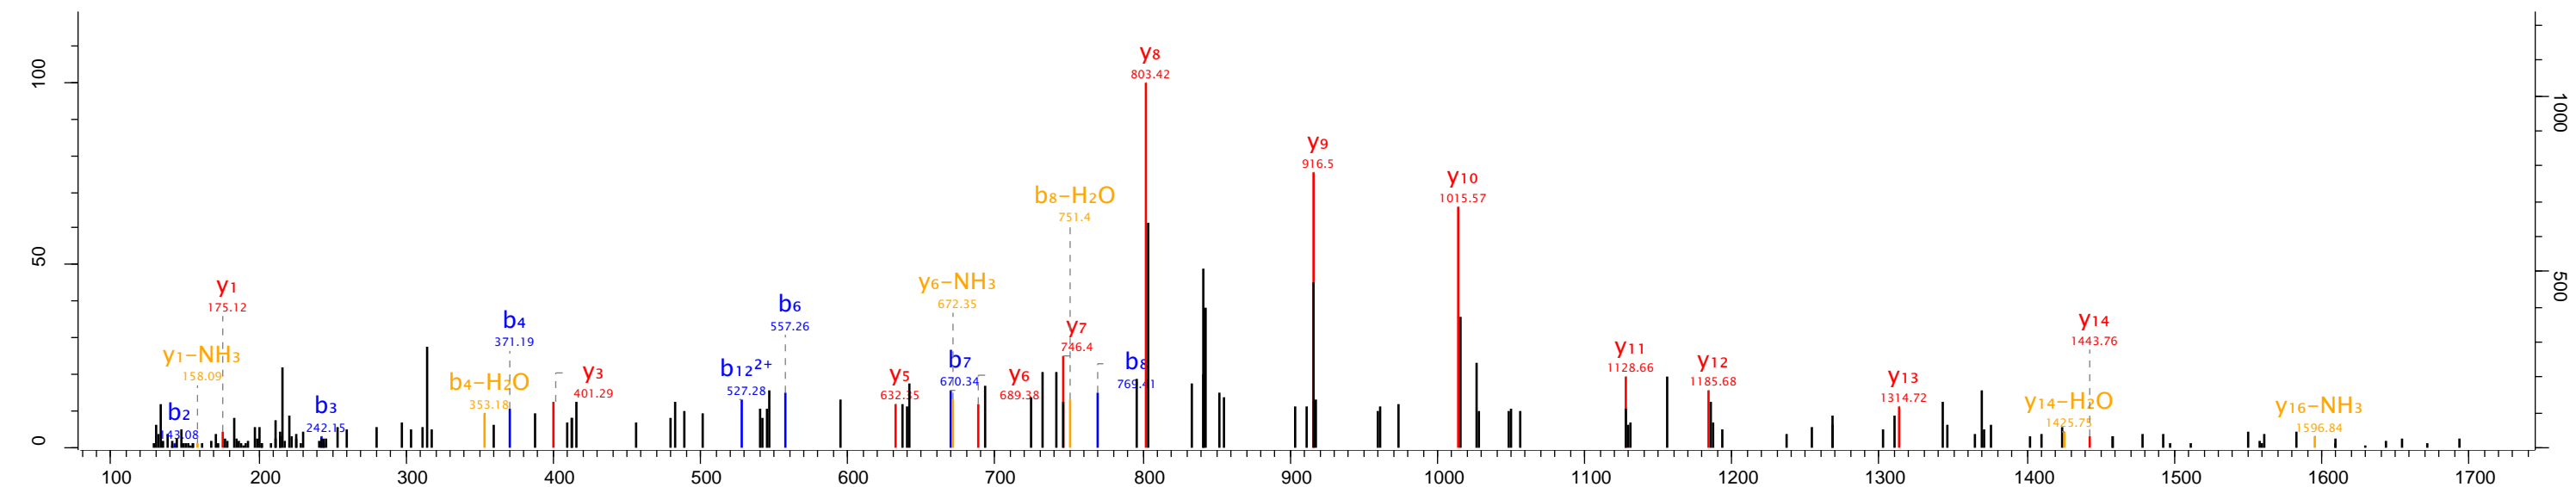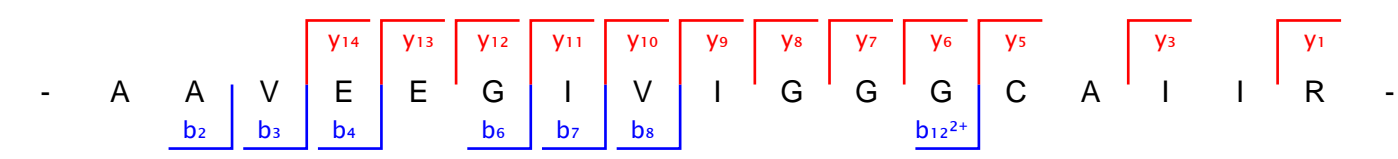

Spectral Annotation for Single-Peptide IDs between Single D11 Cells using Q-OT-LIT

Raw file 2015-01-08\_CL03\_Blastomere-15 Scan 41217 Method ITMS; HCD Score 37.35 m/z 550.28

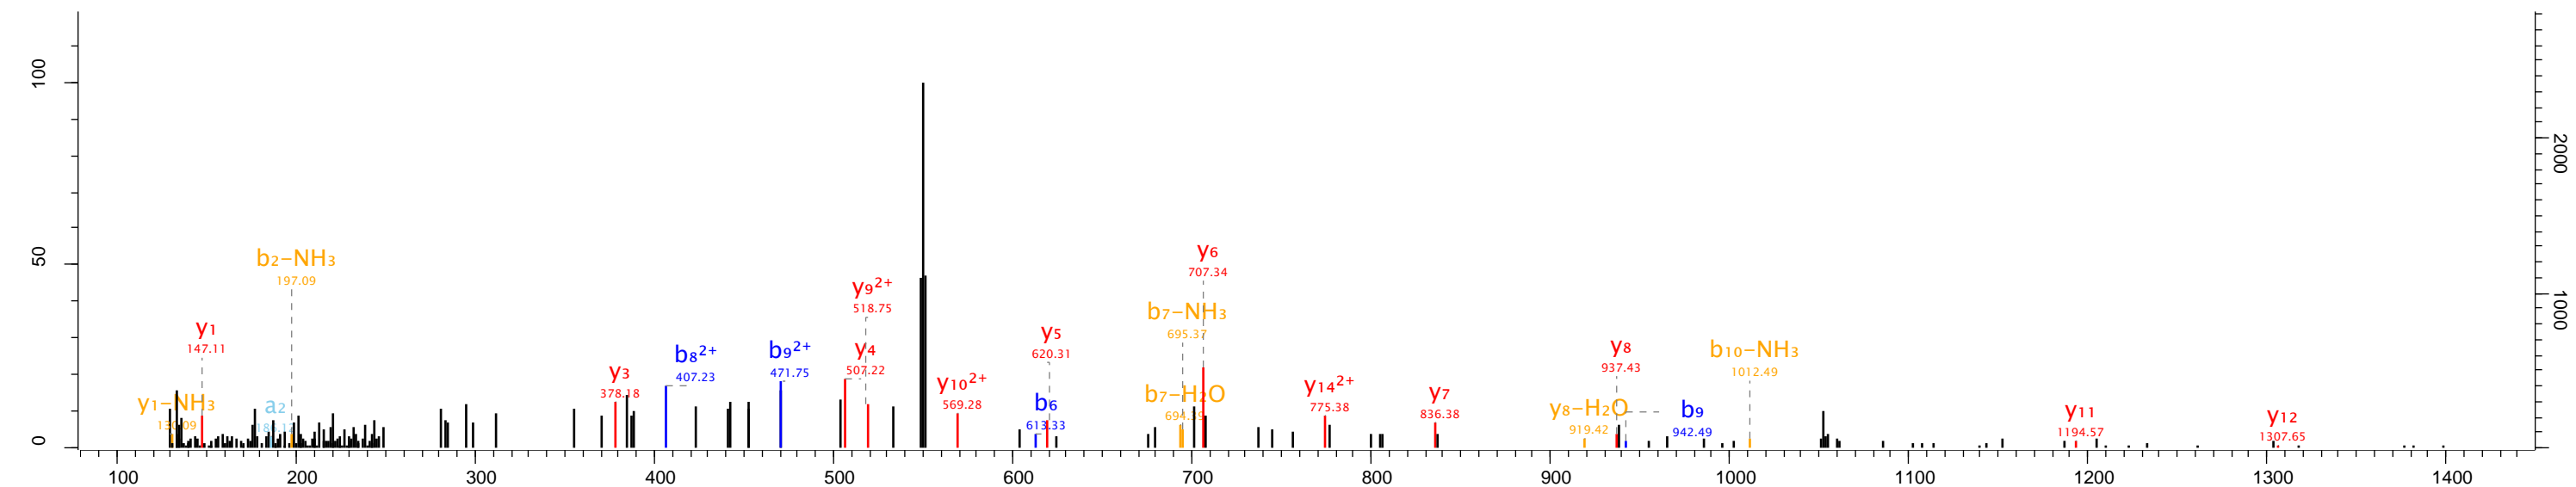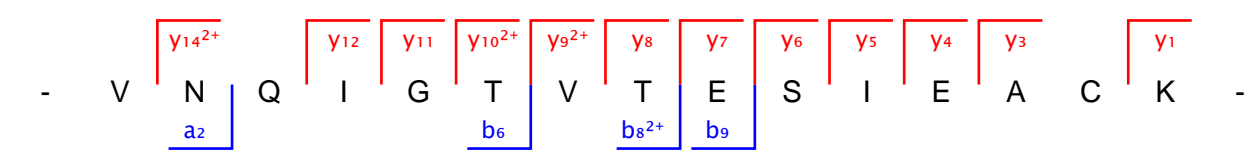

Spectral Annotation for Single-Peptide IDs between Single D11 Cells using Q-OT-LIT

Raw file 2015-01-08\_CL03\_Blastomere-15 Scan 41218 Method ITMS; HCD Score 65.04 m/z 825.41

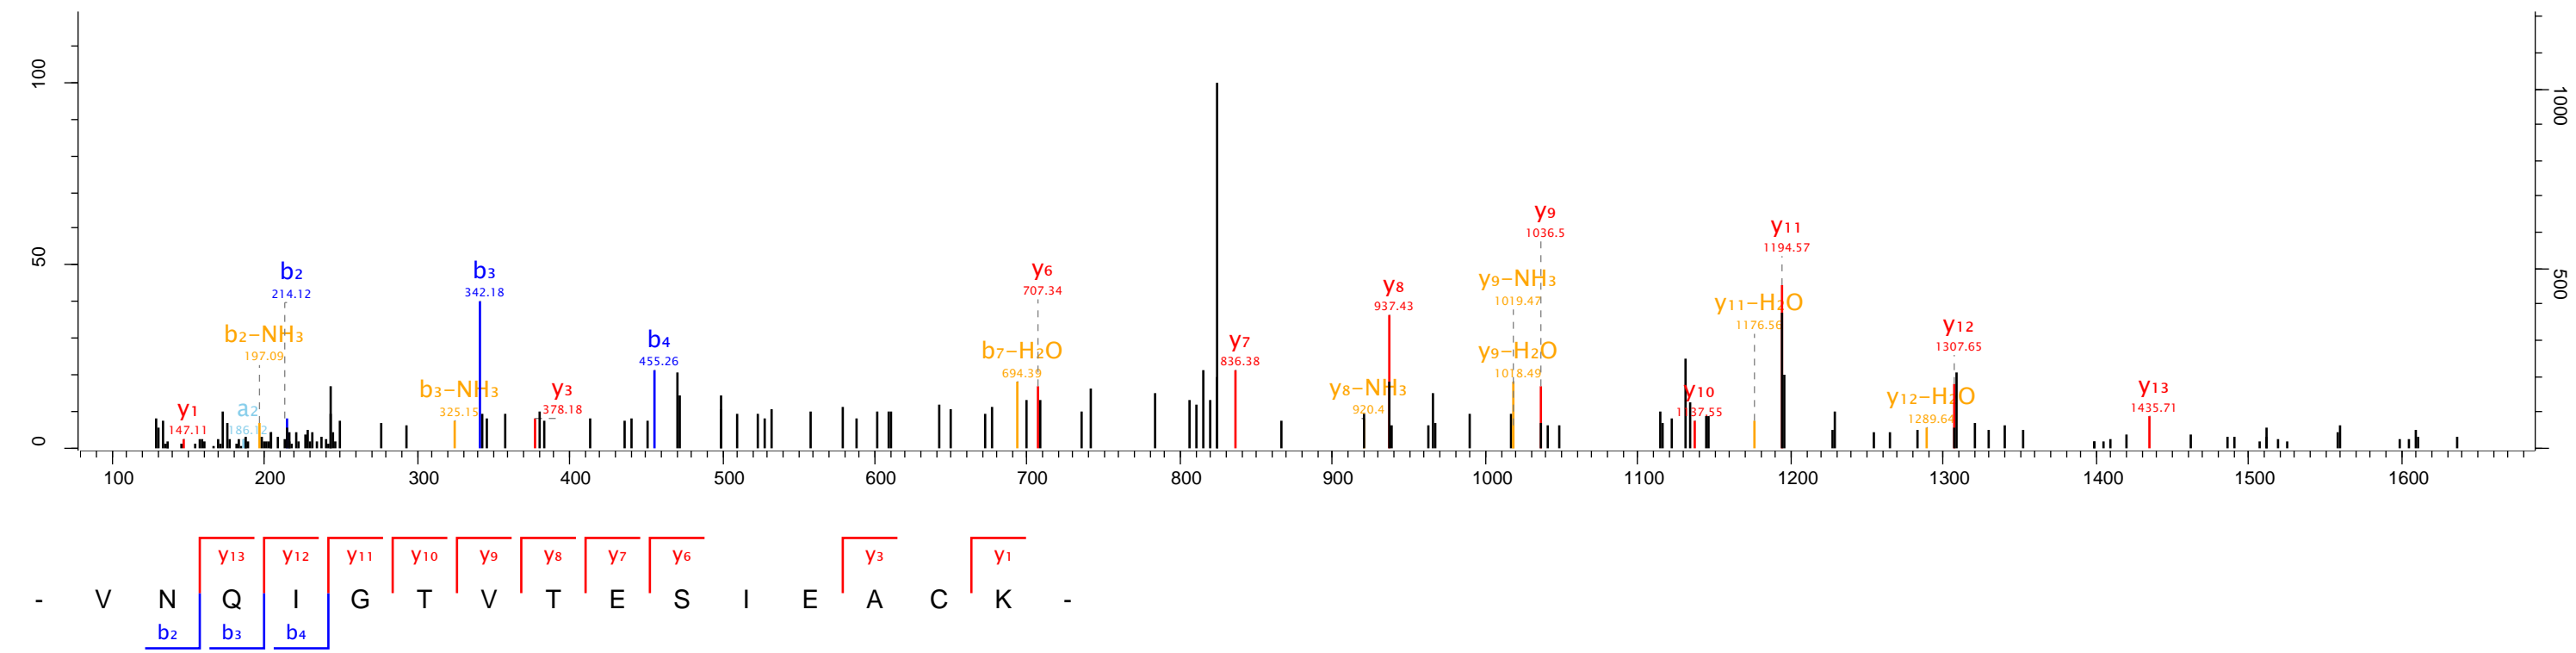

Spectral Annotation for Single-Peptide IDs between Single D11 Cells using Q-OT-LIT

Raw file  
 2015-01-08\_CL03\_Blastomere-15  
 Scan 41270 Method ITMS; HCD Score 45.44 m/z 562.64

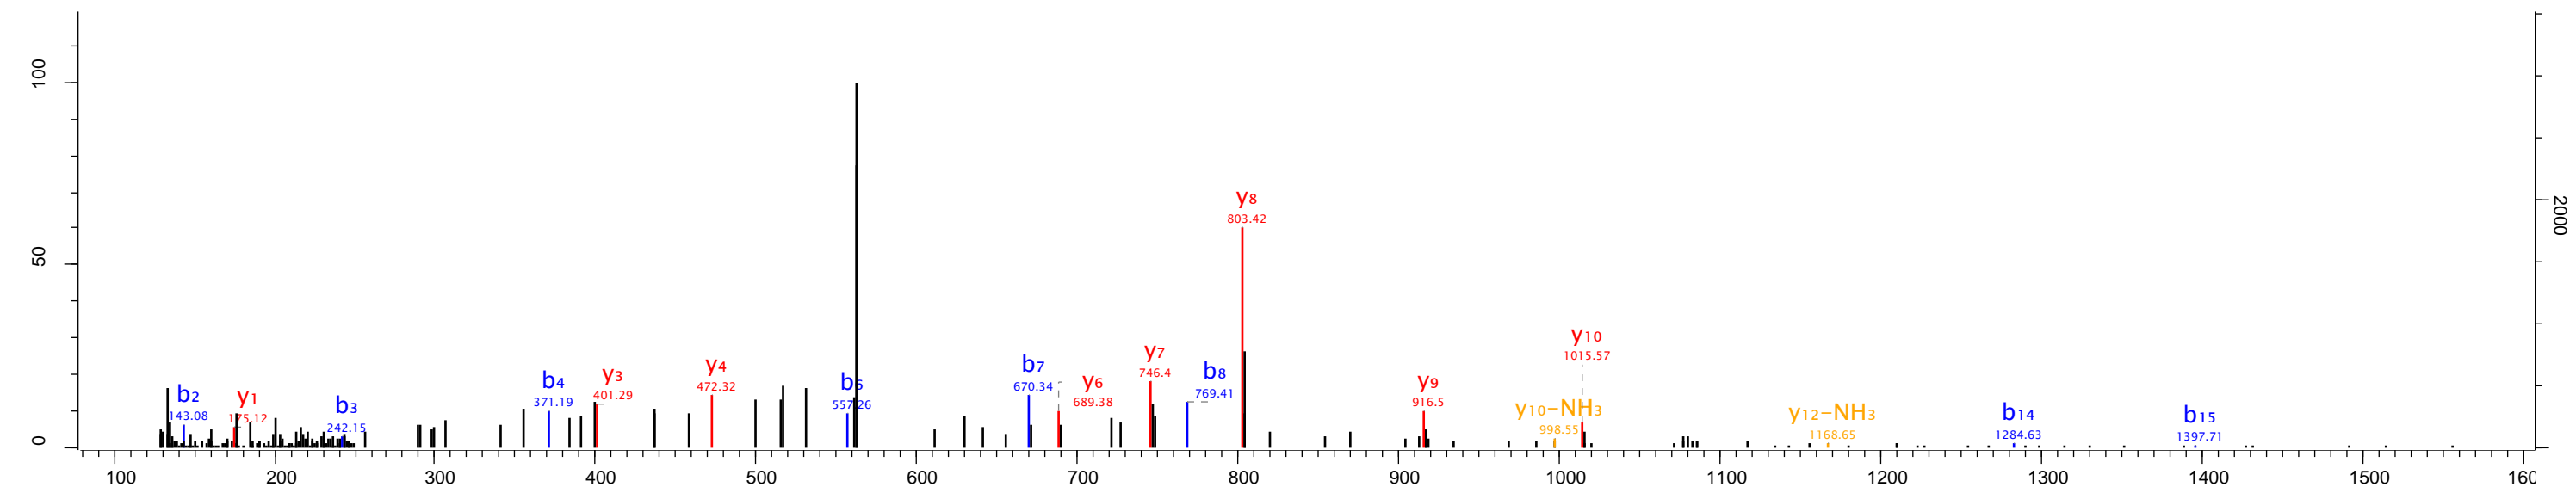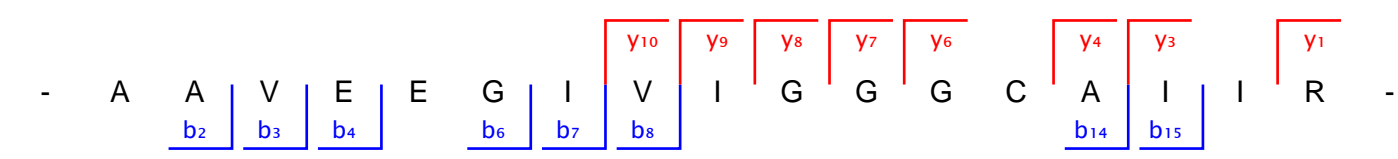

Spectral Annotation for Single-Peptide IDs between Single D11 Cells using Q-OT-LIT

Raw file 2015-01-08\_CL03\_Blastomere-15 Scan 41348 Method ITMS; HCD Score 77.51 m/z 896.45

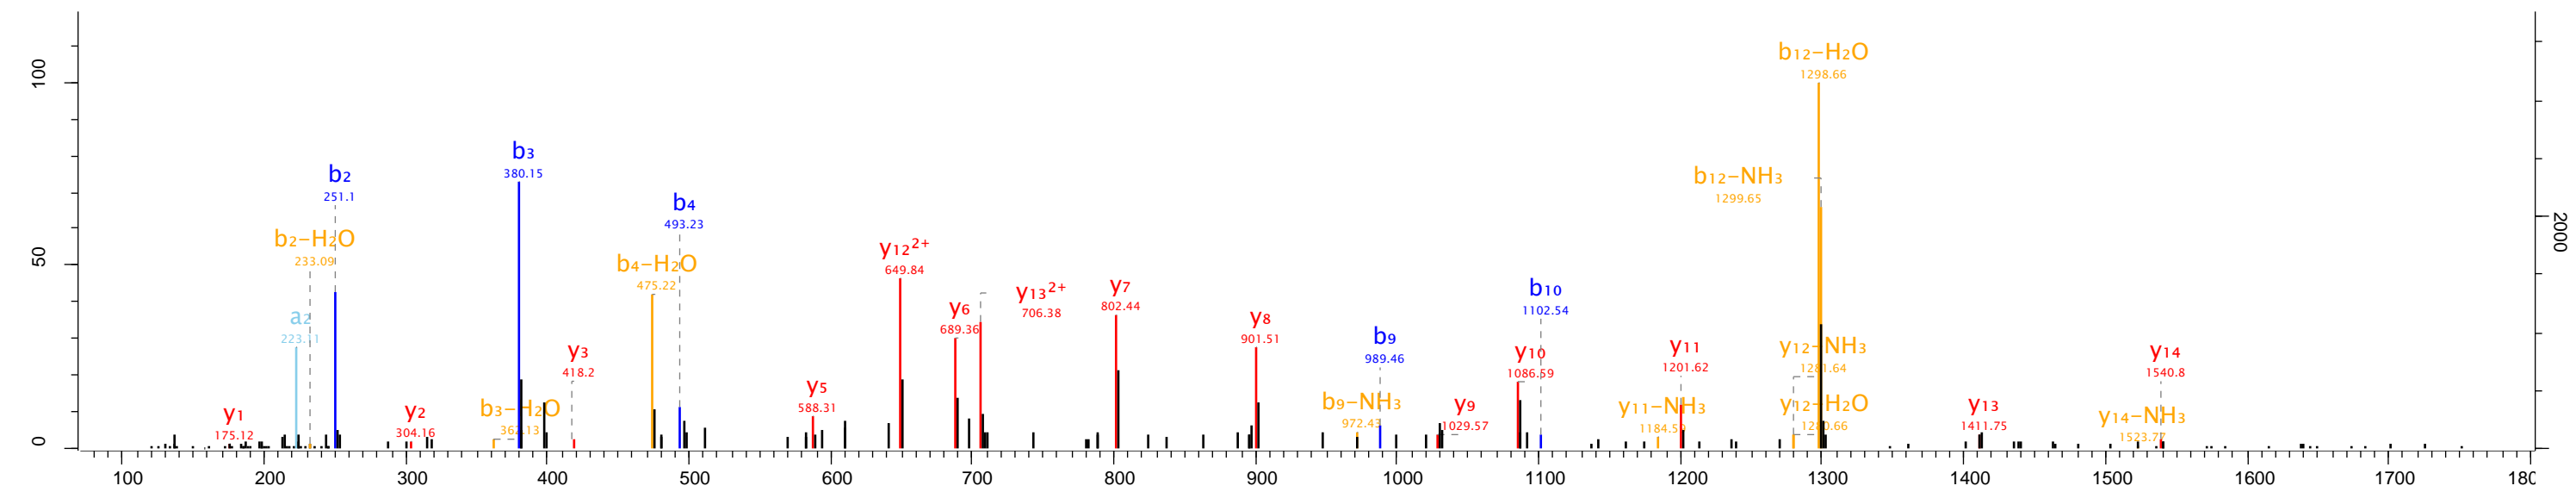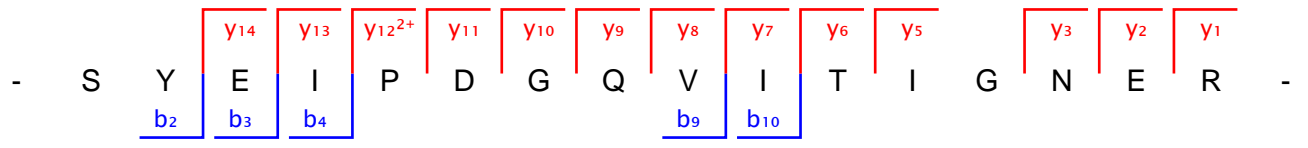

Spectral Annotation for Single-Peptide IDs between Single D11 Cells using Q-OT-LIT



Raw file 2015-01-08\_CL03\_Blastomere-15 Scan 41365 Method ITMS; HCD Score 55.1 m/z 890.9

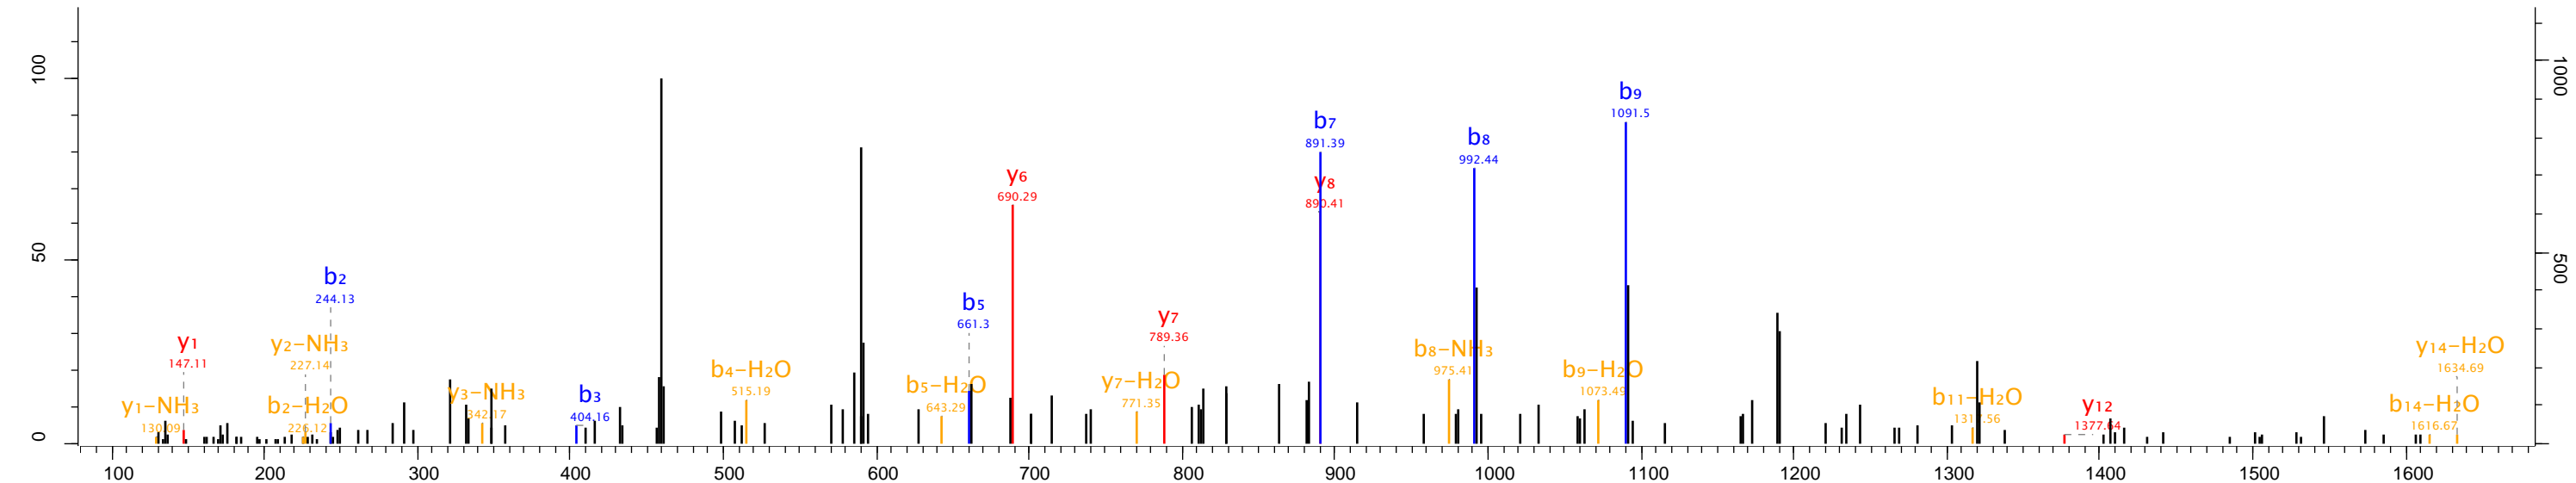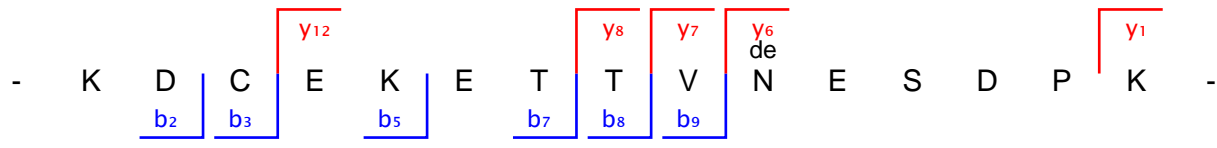

Spectral Annotation for Single-Peptide IDs between Single D11 Cells using Q-OT-LIT

Raw file 2015-01-08\_CL03\_Blastomere-15 Scan 41369 Method ITMS; HCD Score 121.82 m/z 895.95

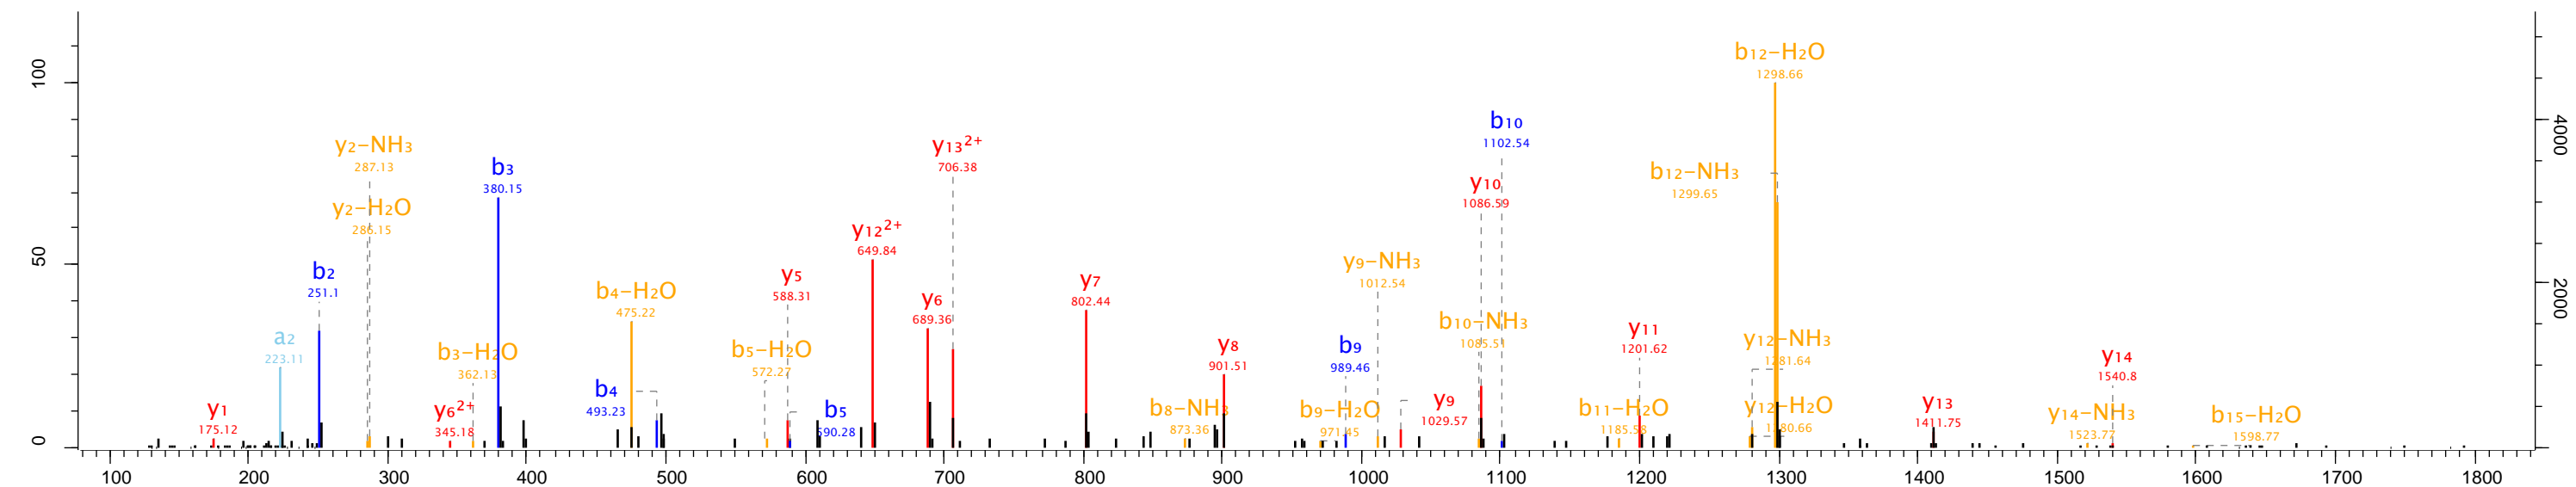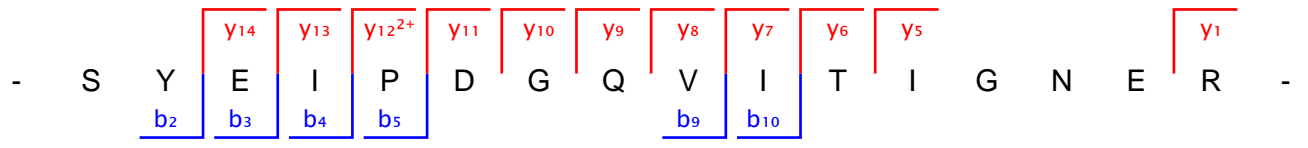

Spectral Annotation for Single-Peptide IDs between Single D11 Cells using Q-OT-LIT

Raw file 2015-01-08\_CL03\_Blastomere-15 Scan 41380 Method ITMS; HCD Score 59.67 m/z 901.96

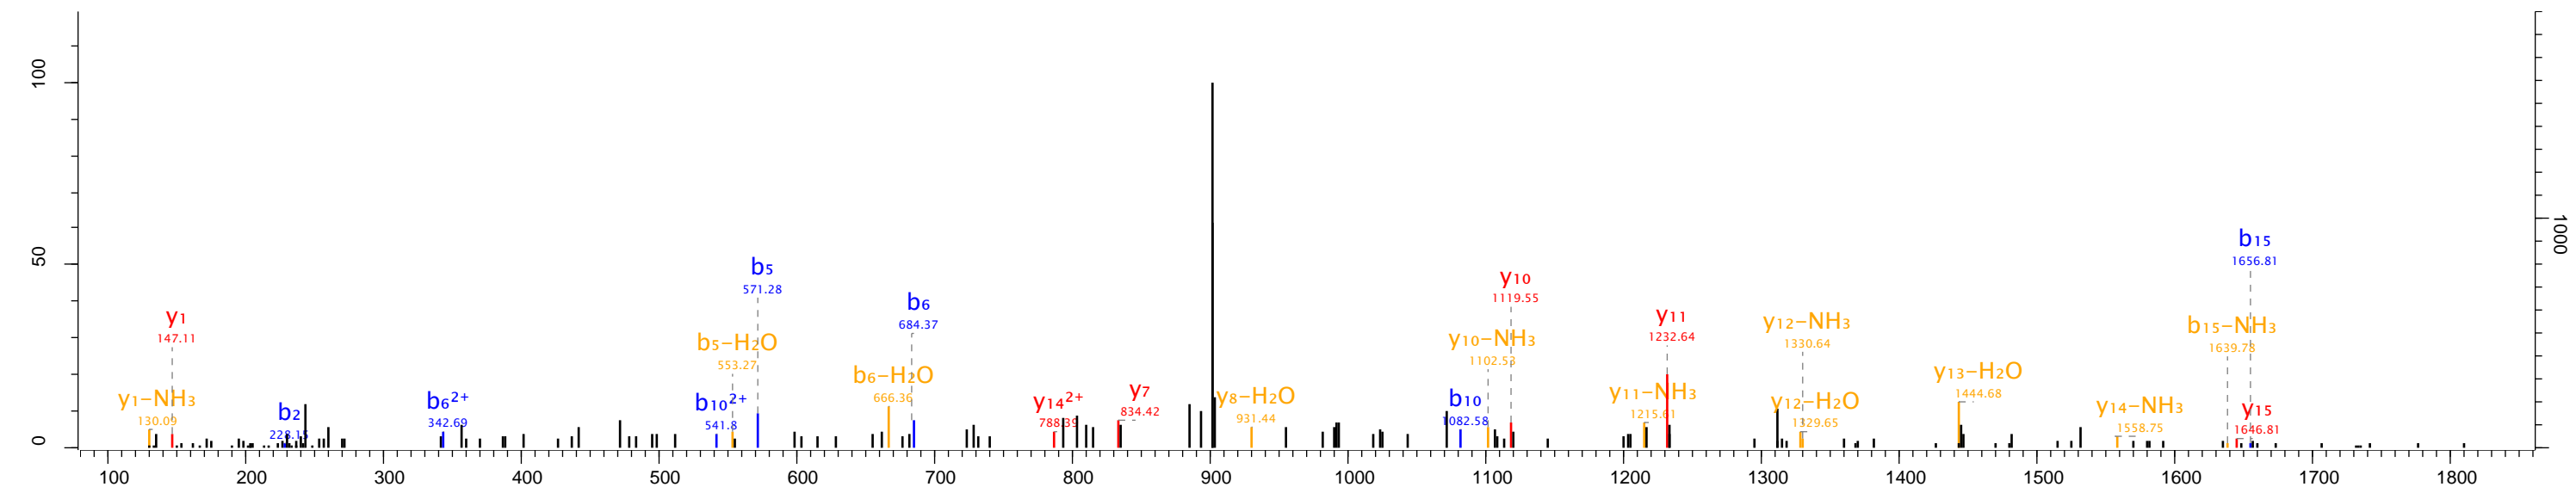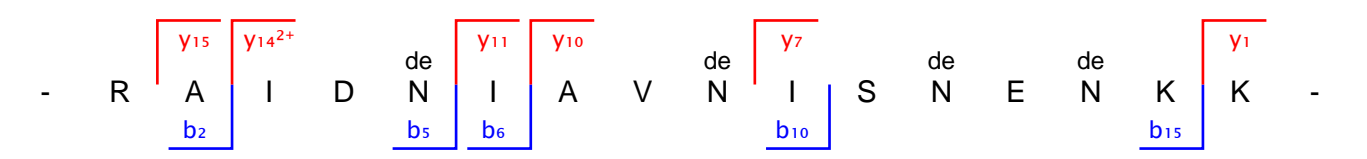

Spectral Annotation for Single-Peptide IDs between Single D11 Cells using Q-OT-LIT

Raw file 2015-01-08\_CL03\_Blastomere-15 Scan 41385 Method ITMS; HCD Score 109.04 m/z 895.95

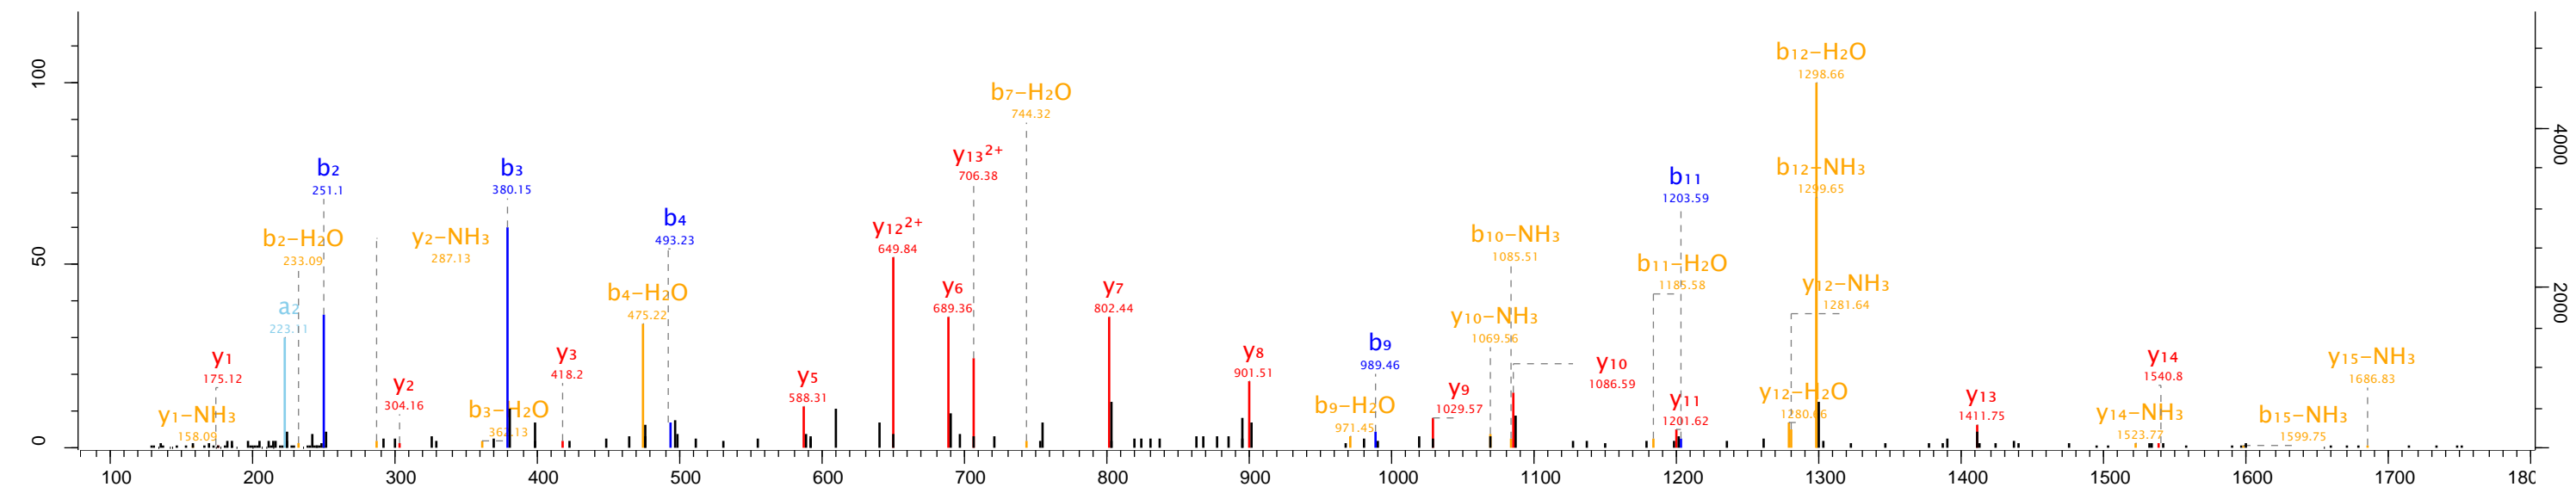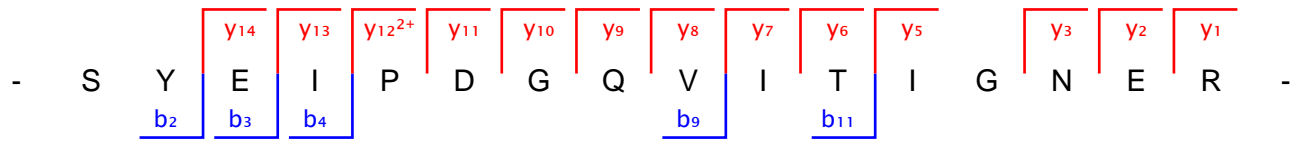

Spectral Annotation for Single-Peptide IDs between Single D11 Cells using Q-OT-LIT

Raw file 2015-01-08\_CL03\_Blastomere-15 Scan 41416 Method ITMS; HCD Score 91.59 m/z 597.97

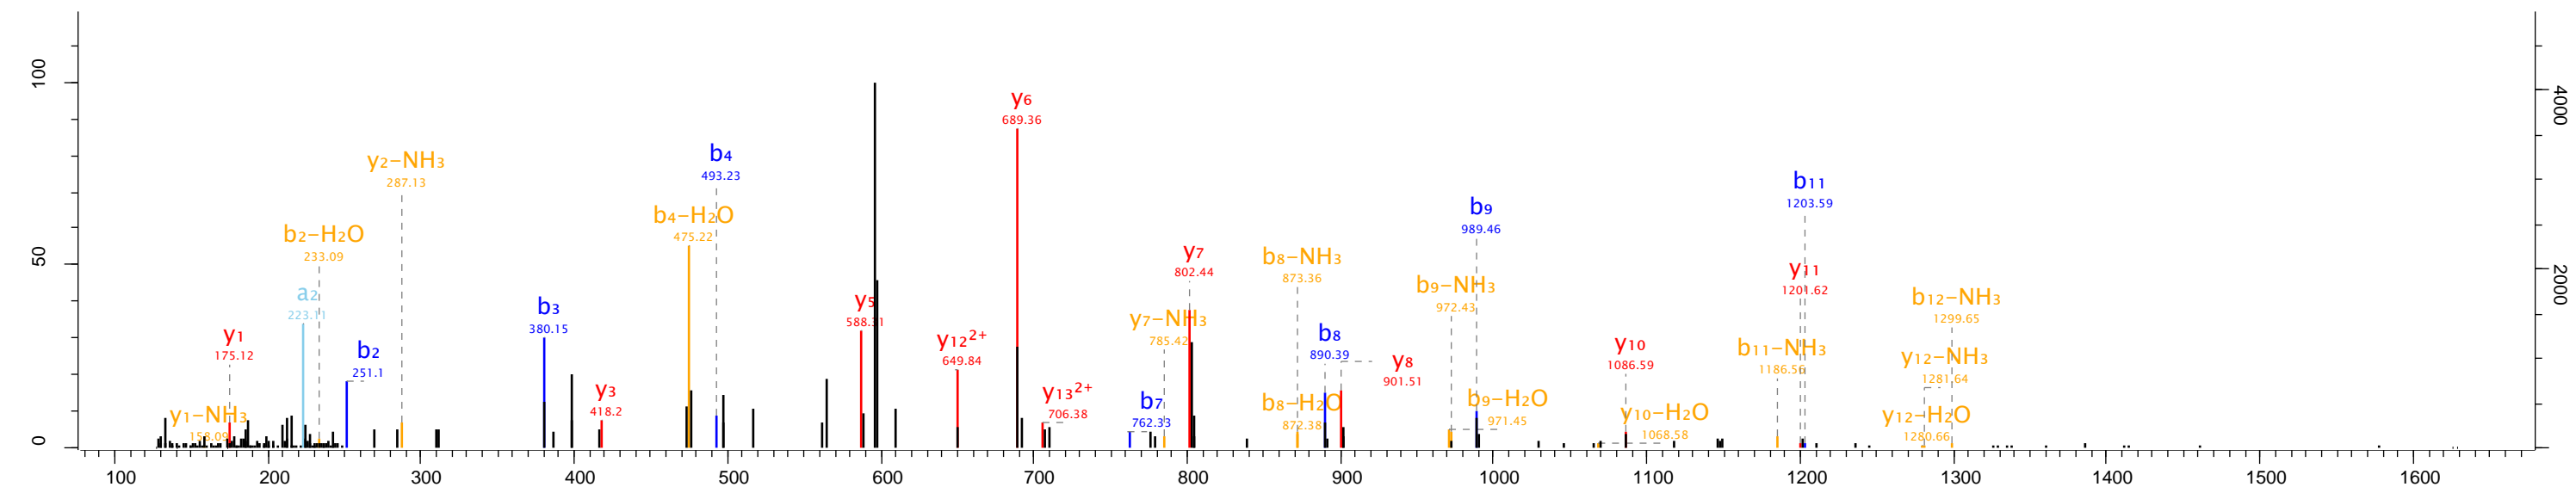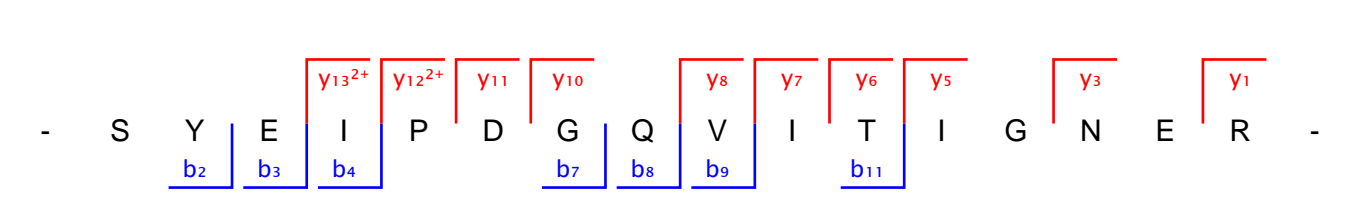

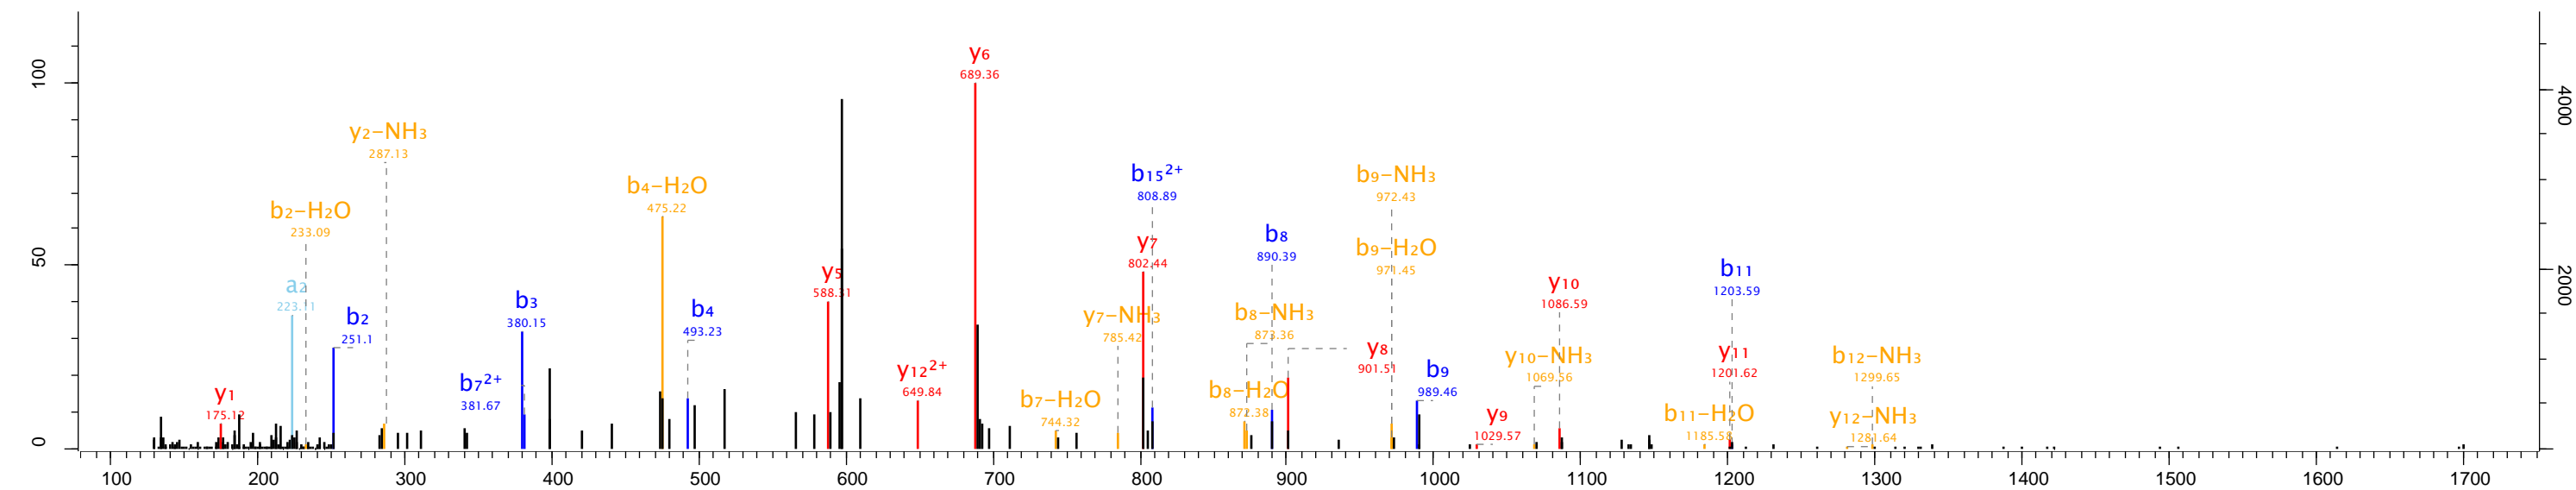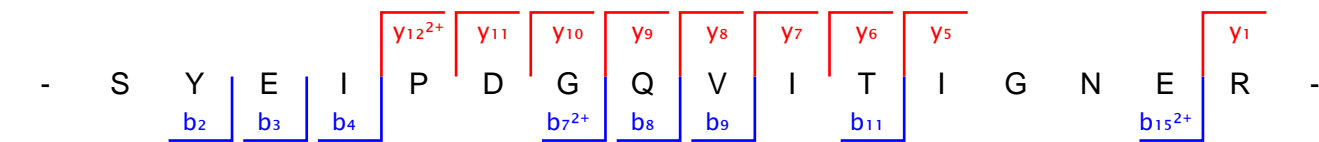

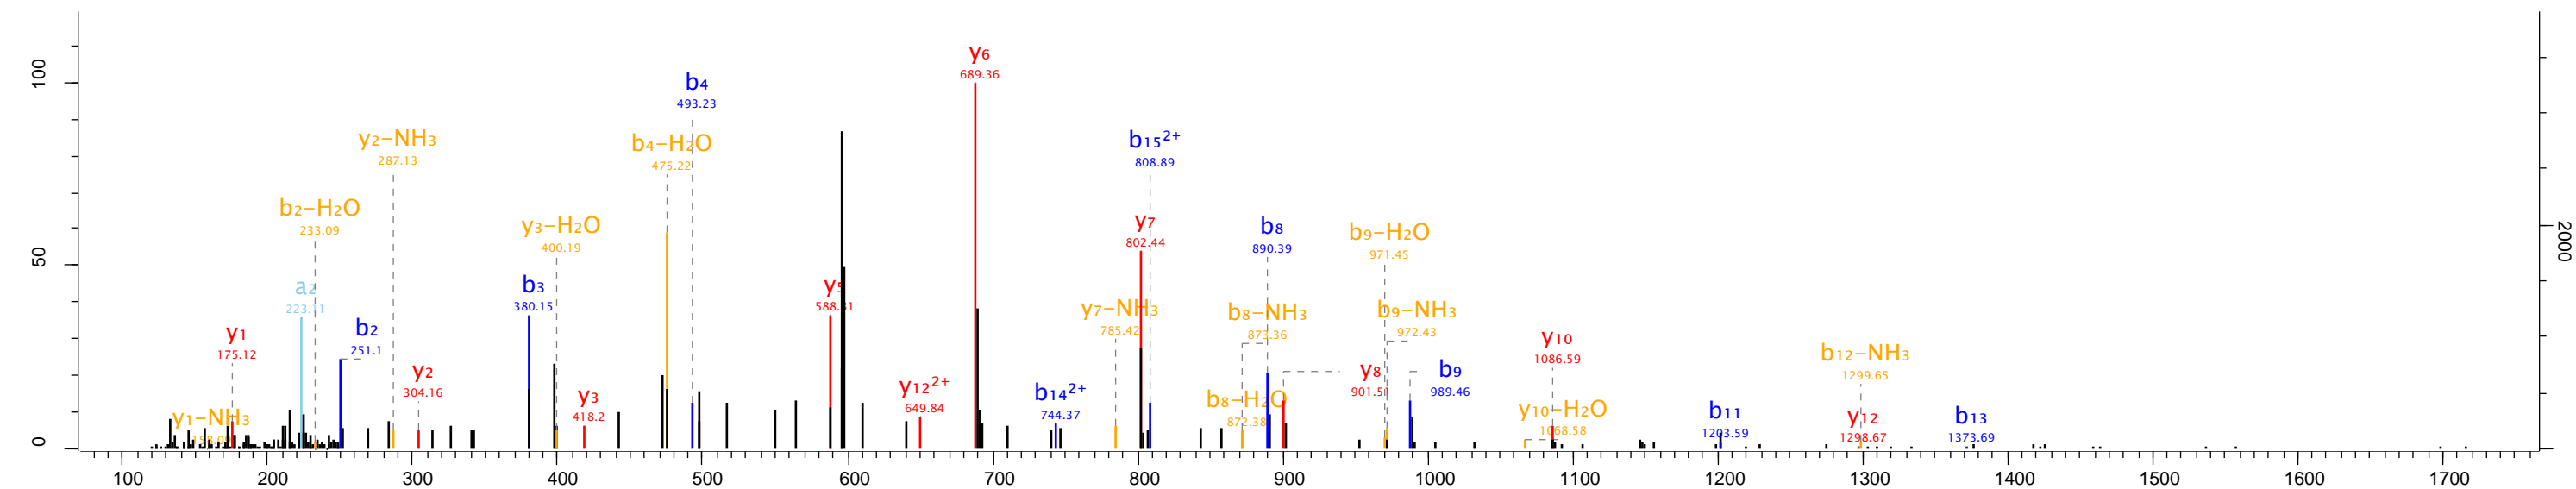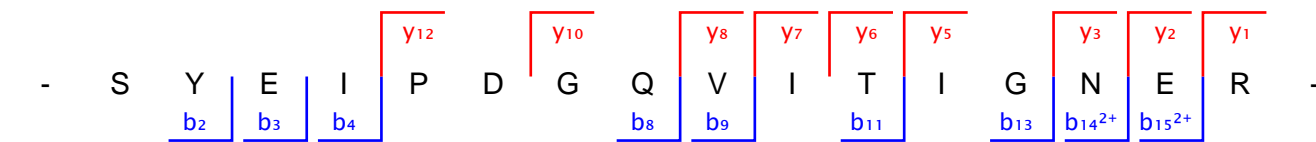

Raw file: 2015-01-08\_CL03\_Blastomere-15  
 Scan: 41535 Method: ITMS; HCD Score: 42.35 m/z: 1059.17

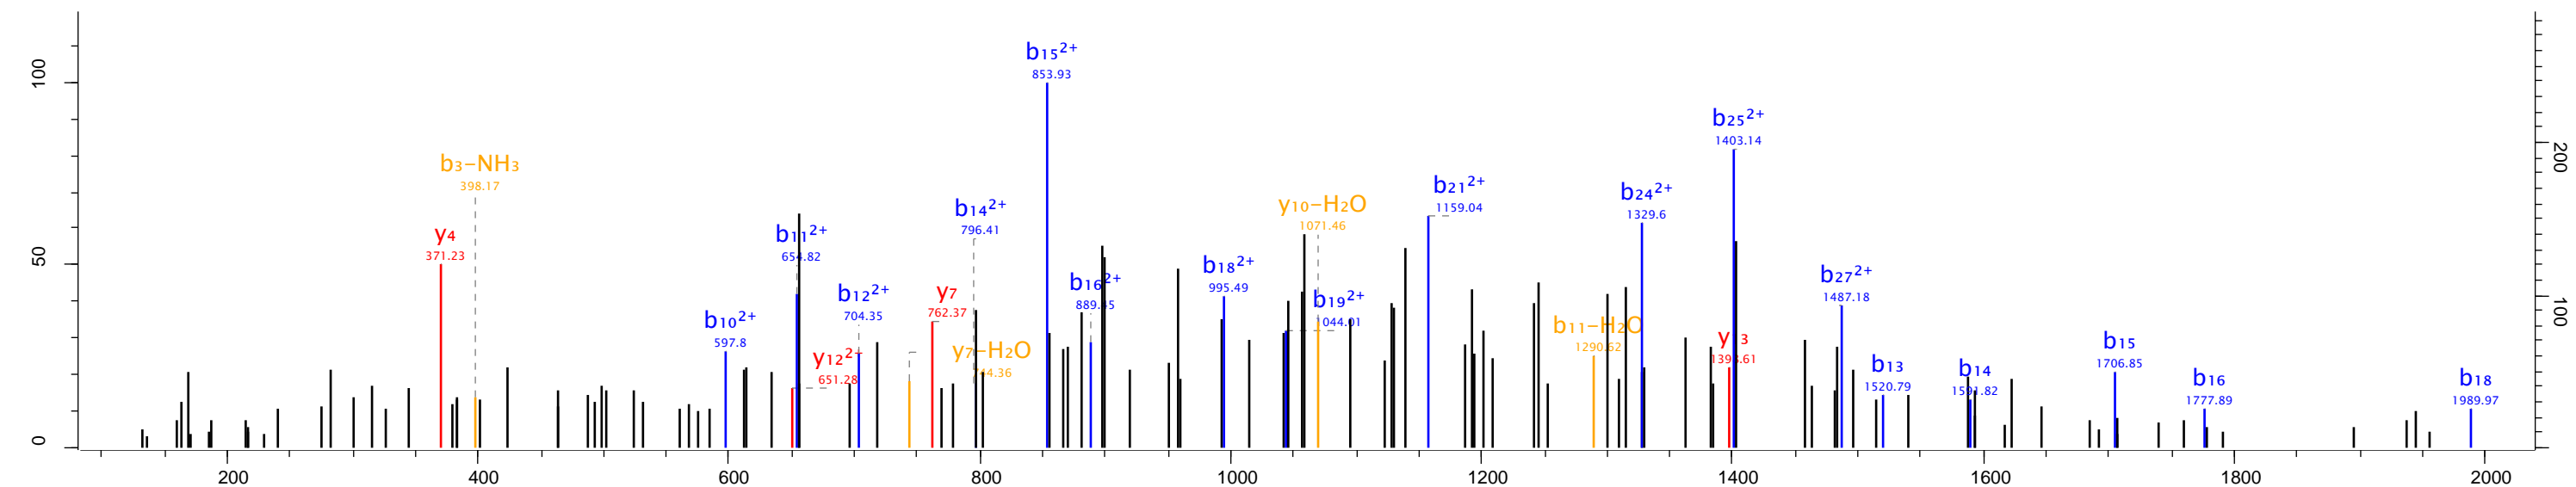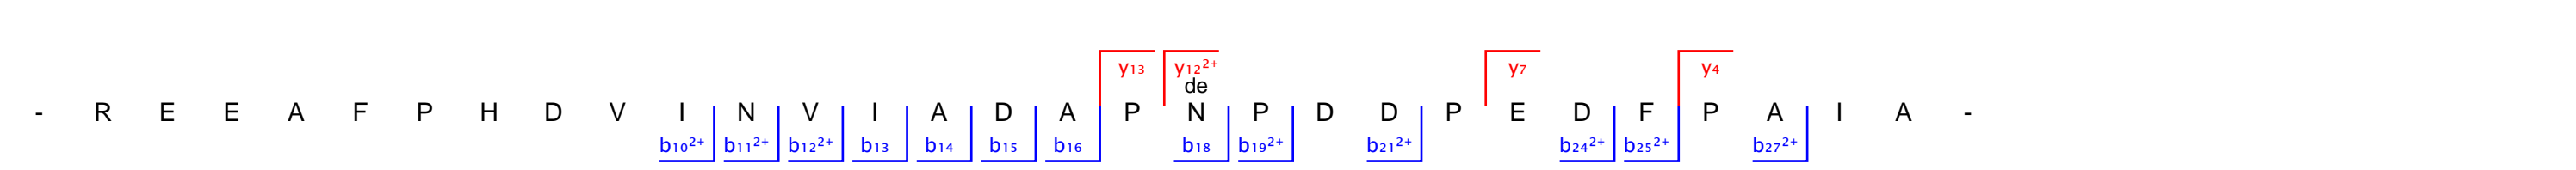



Raw file 2015-01-08\_CL03\_Blastomere-15 Scan 41717 Method ITMS; HCD Score 57.15 m/z 842.95

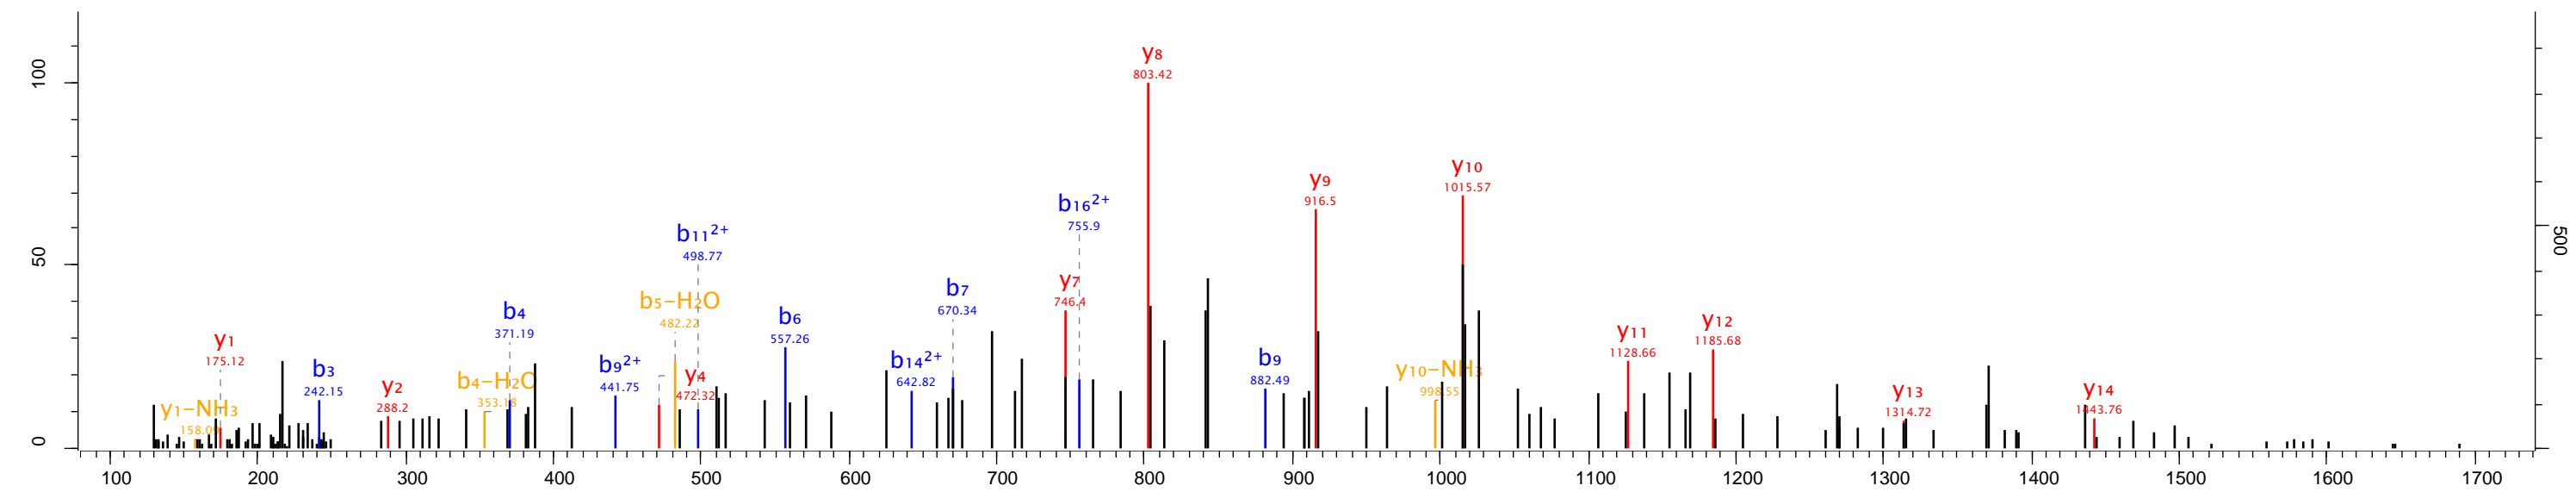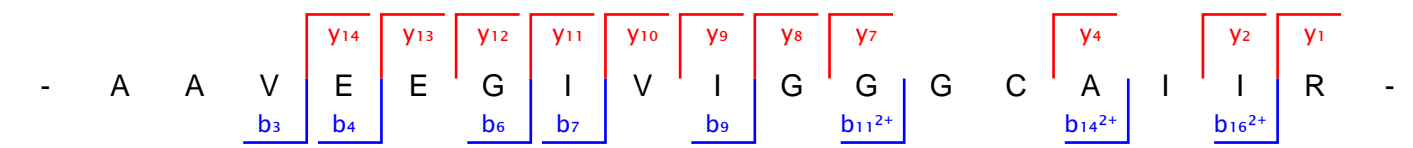

Spectral Annotation for Single-Peptide IDs between Single D11 Cells using Q-OT-LIT

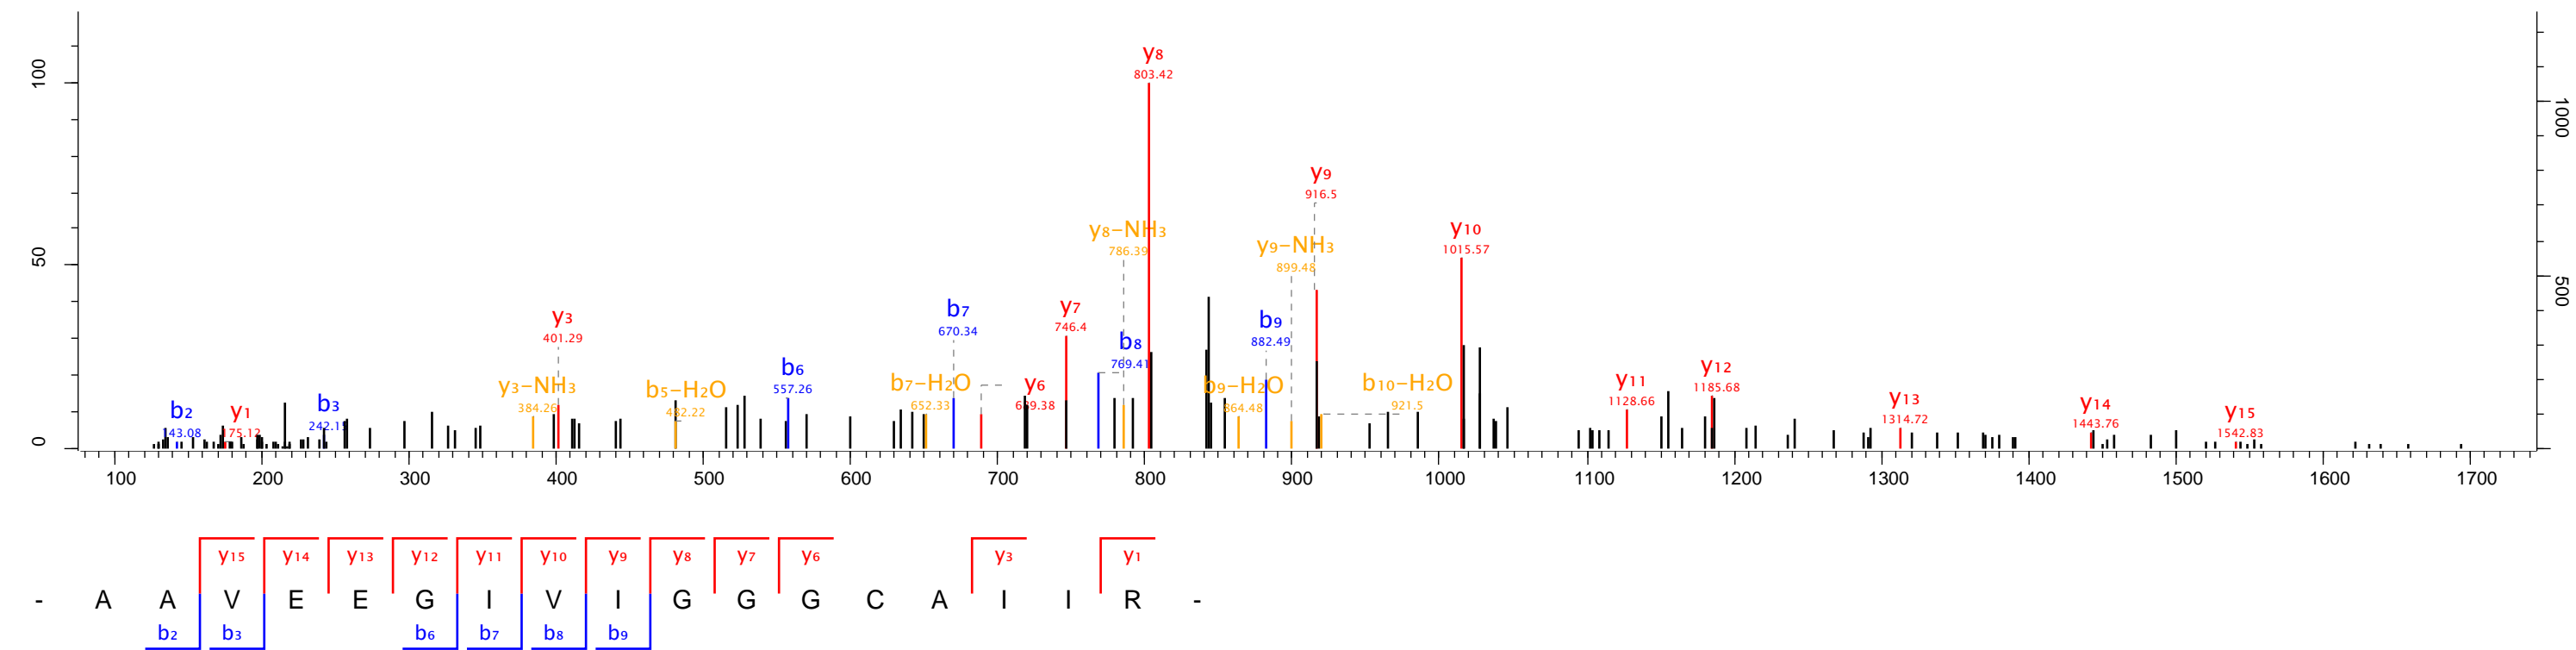

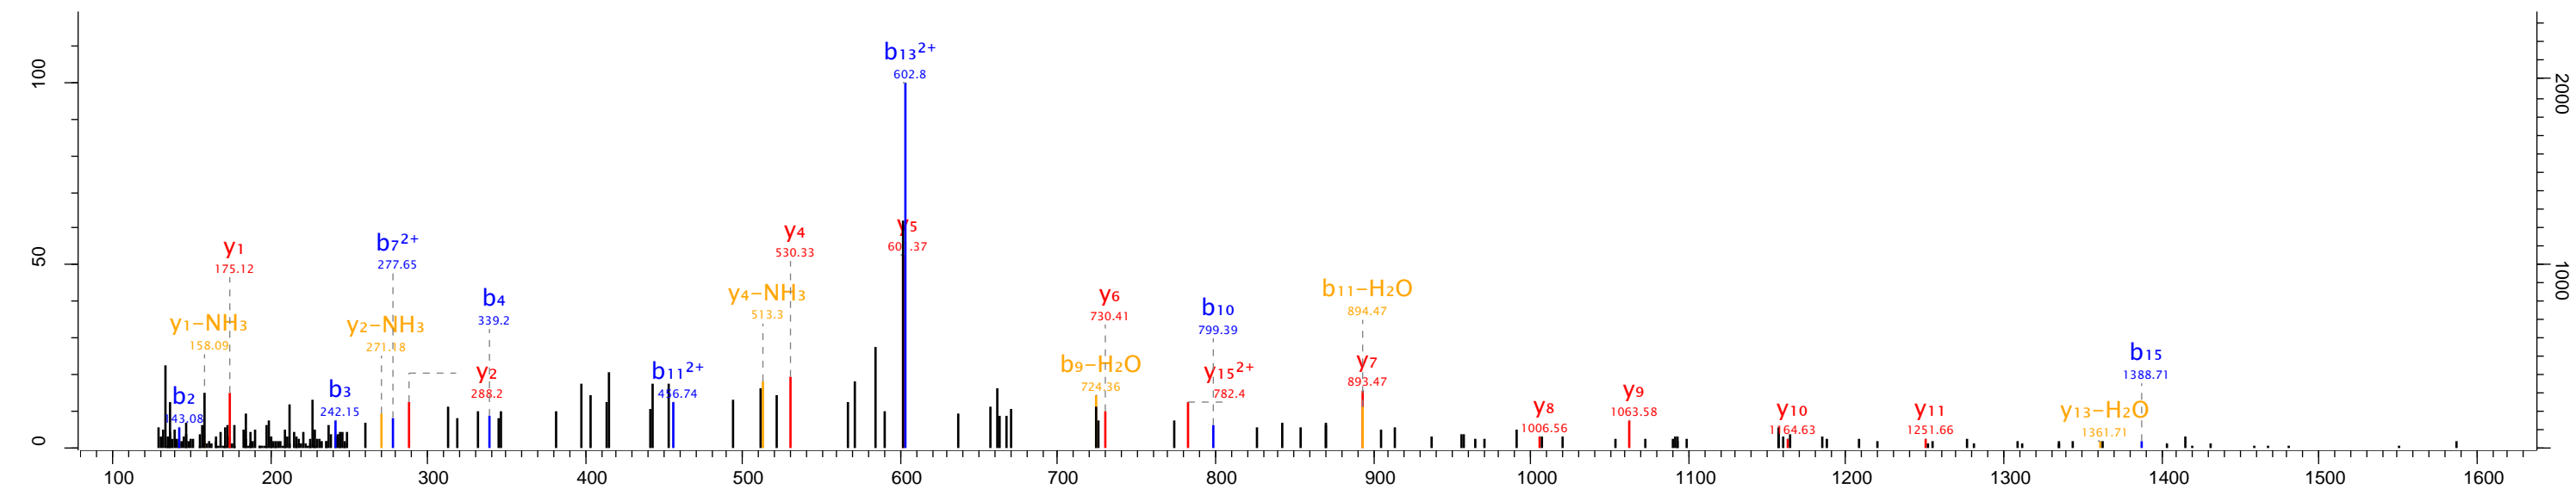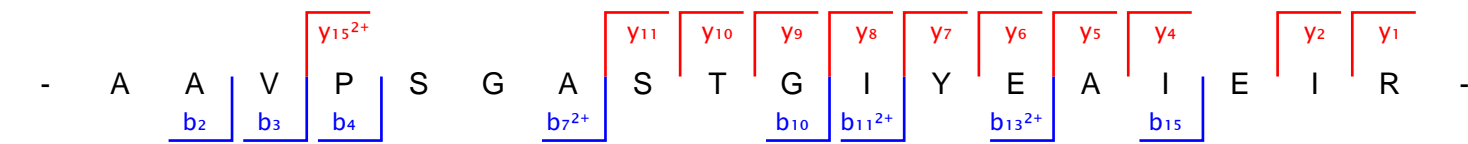

Raw file  
 2015-01-08\_CL03\_Blastomere-15  
 Scan 41964 Method ITMS; HCD Score 38.36 m/z 1059.17

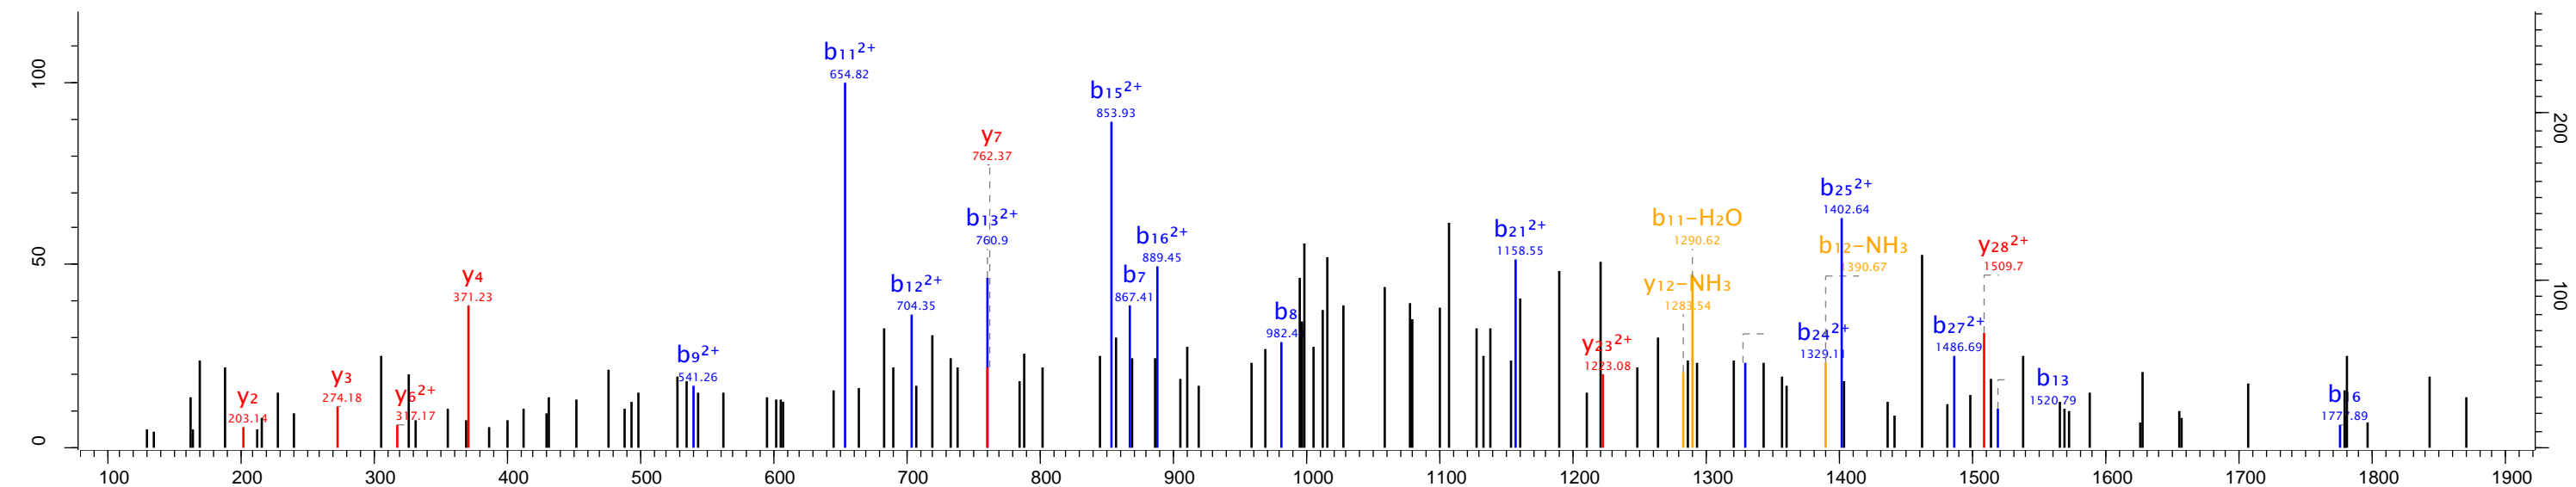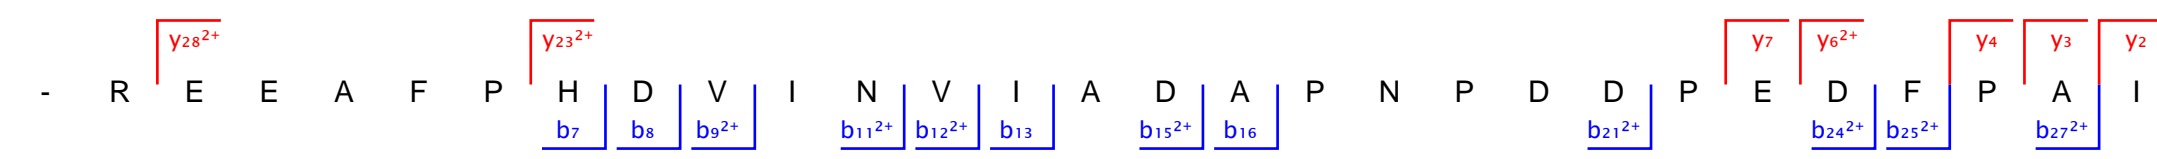

Spectral Annotation for Single-Peptide IDs between Single D11 Cells using Q-OT-LIT

Raw file 2015-01-08\_CL03\_Blastomere-15  
 Scan 42065 Method ITMS; HCD Score 24.63 m/z 1059.17

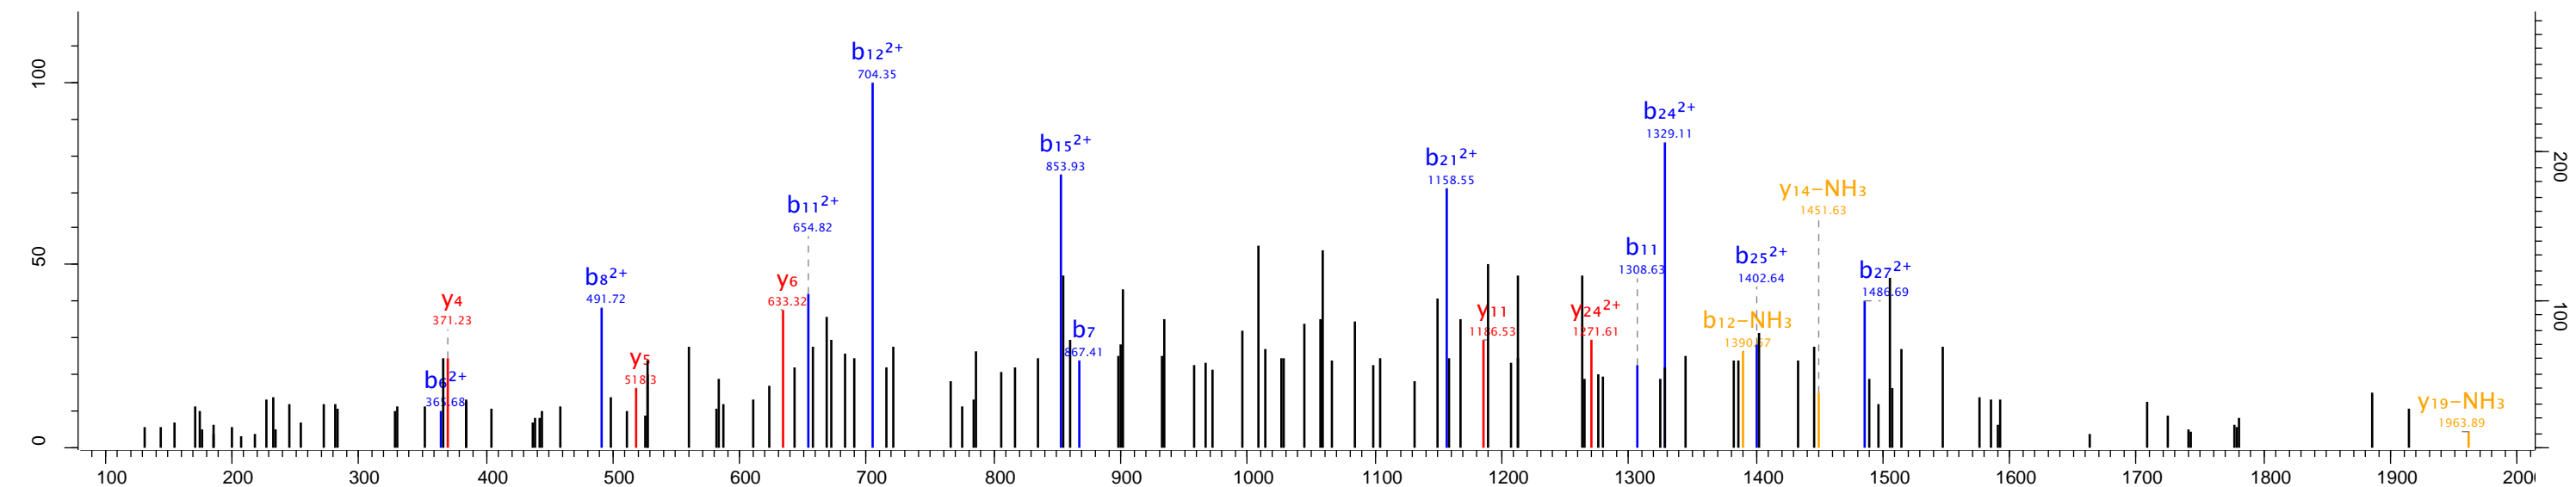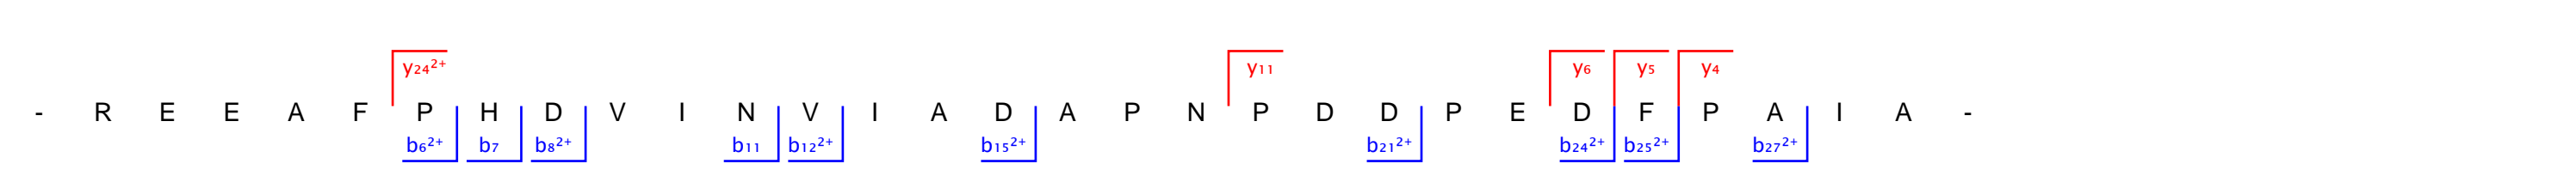

Raw file 2015-01-08\_CL03\_Blastomere-15  
 Scan 42074 Method ITMS; HCD Score 38.28 m/z 1059.17

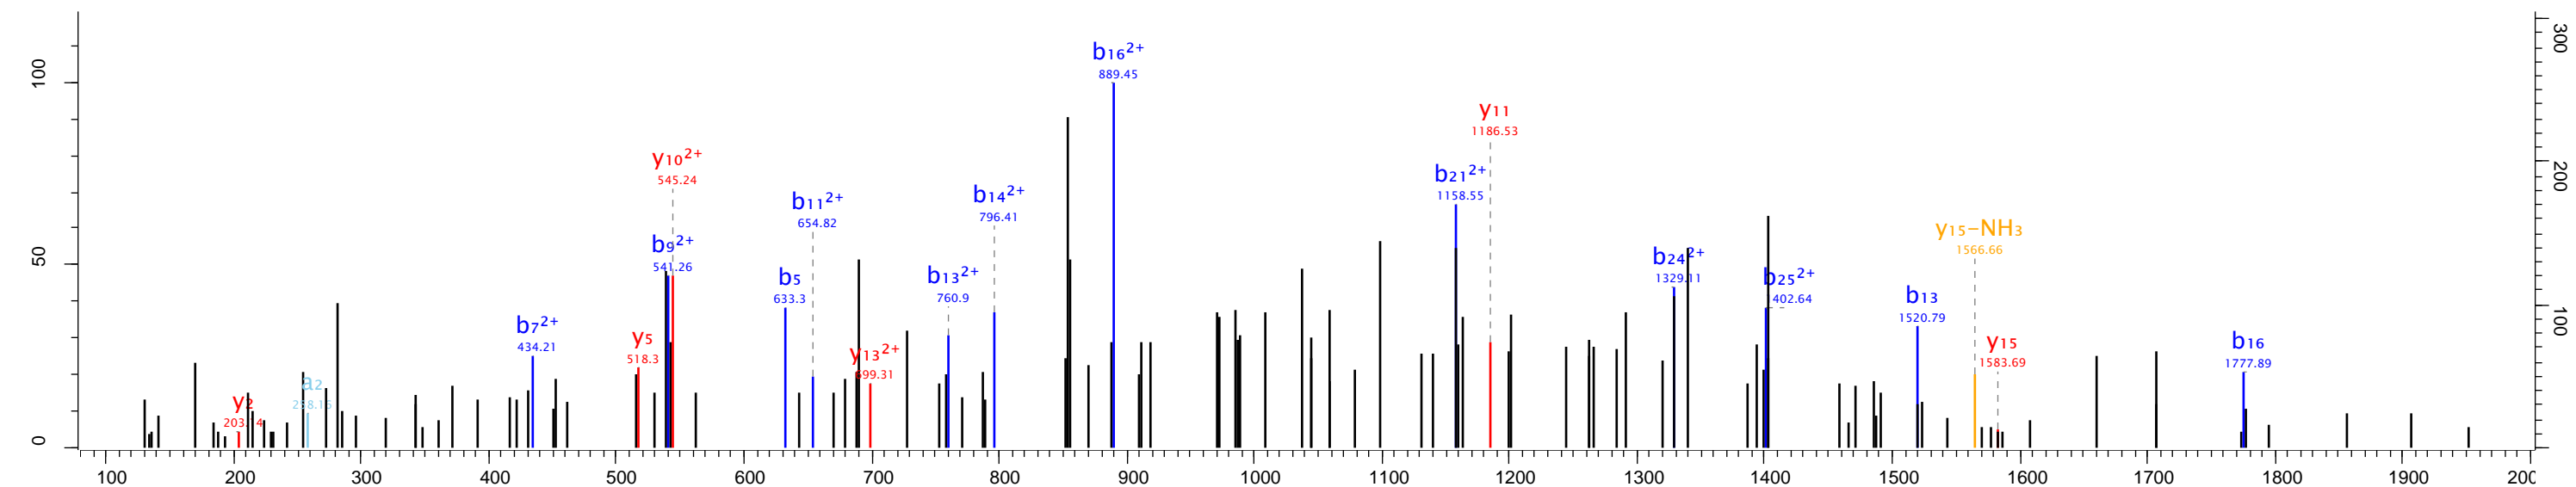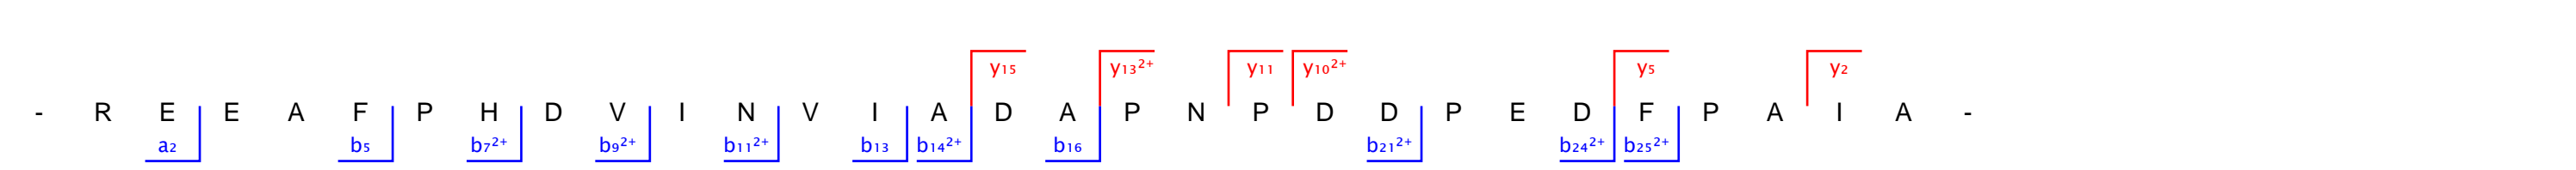

Spectral Annotation for Single-Peptide IDs between Single D11 Cells using Q-OT-LIT

Raw file 2015-01-08\_CL03\_Blastomere-15  
 Scan 42093 Method ITMS; HCD Score 26.21 m/z 1059.17

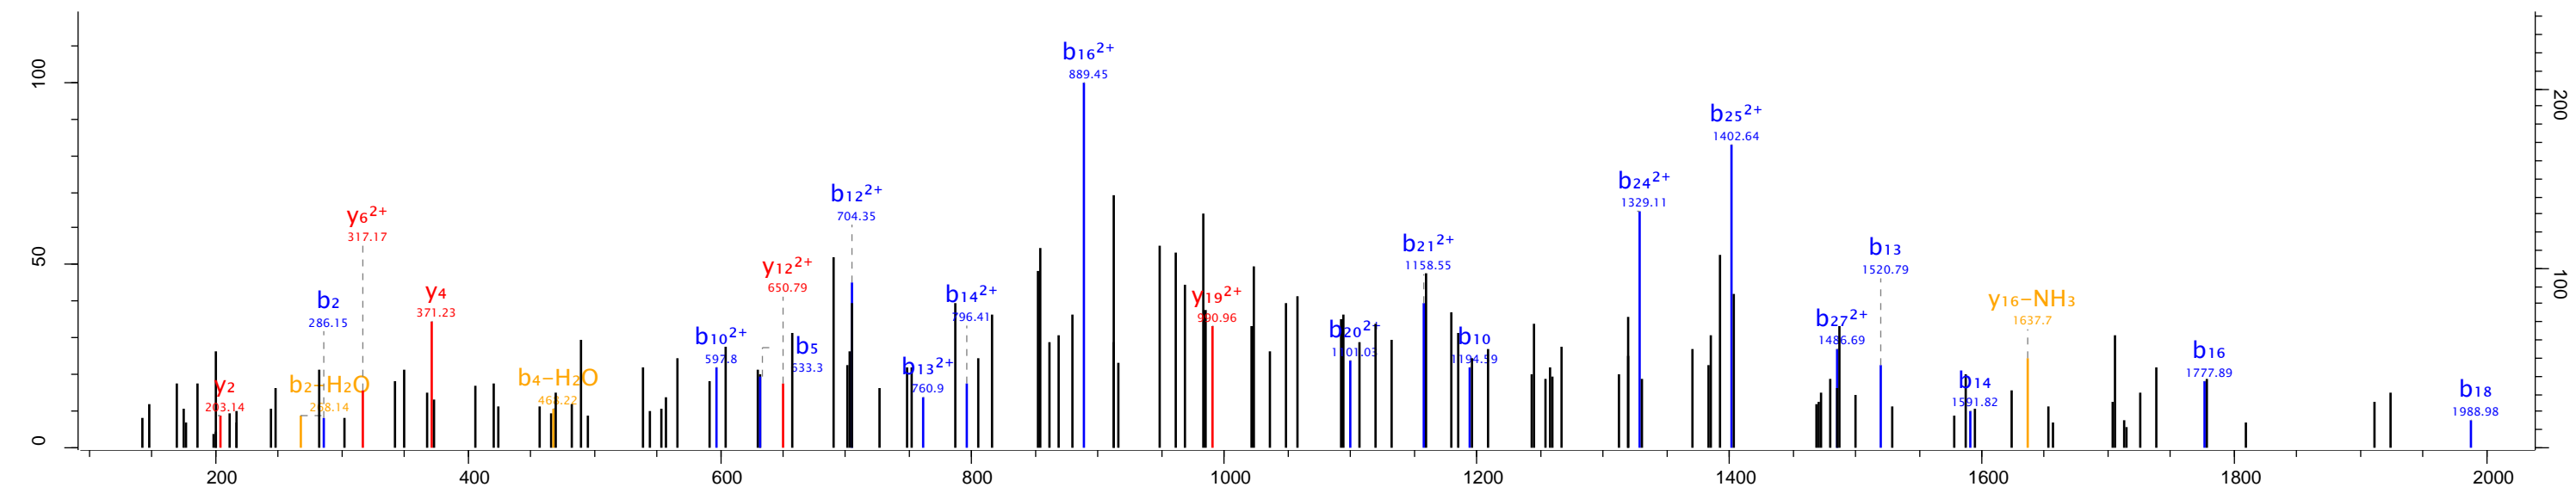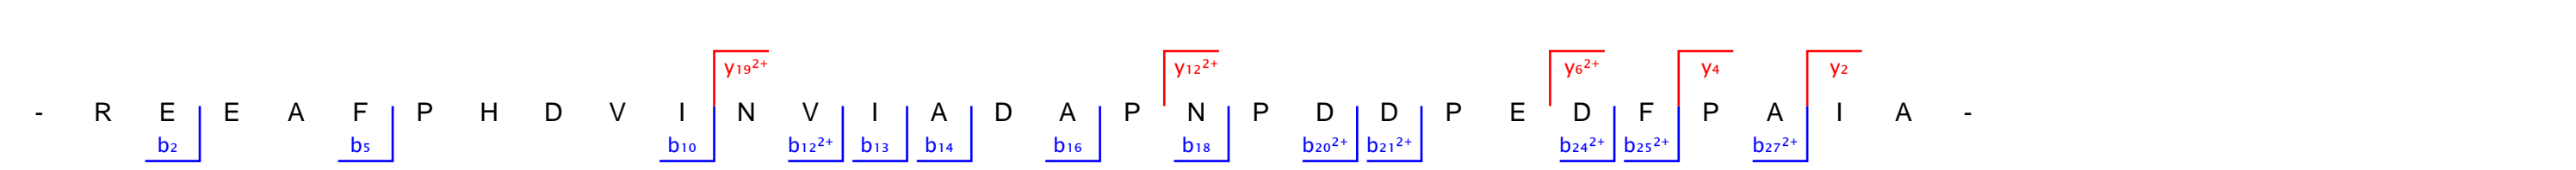

Spectral Annotation for Single-Peptide IDs between Single D11 Cells using Q-OT-LIT

Raw file 2015-01-08\_CL03\_Blastomere-15  
 Scan 42143 Method ITMS; HCD Score 34.04 m/z 1059.17

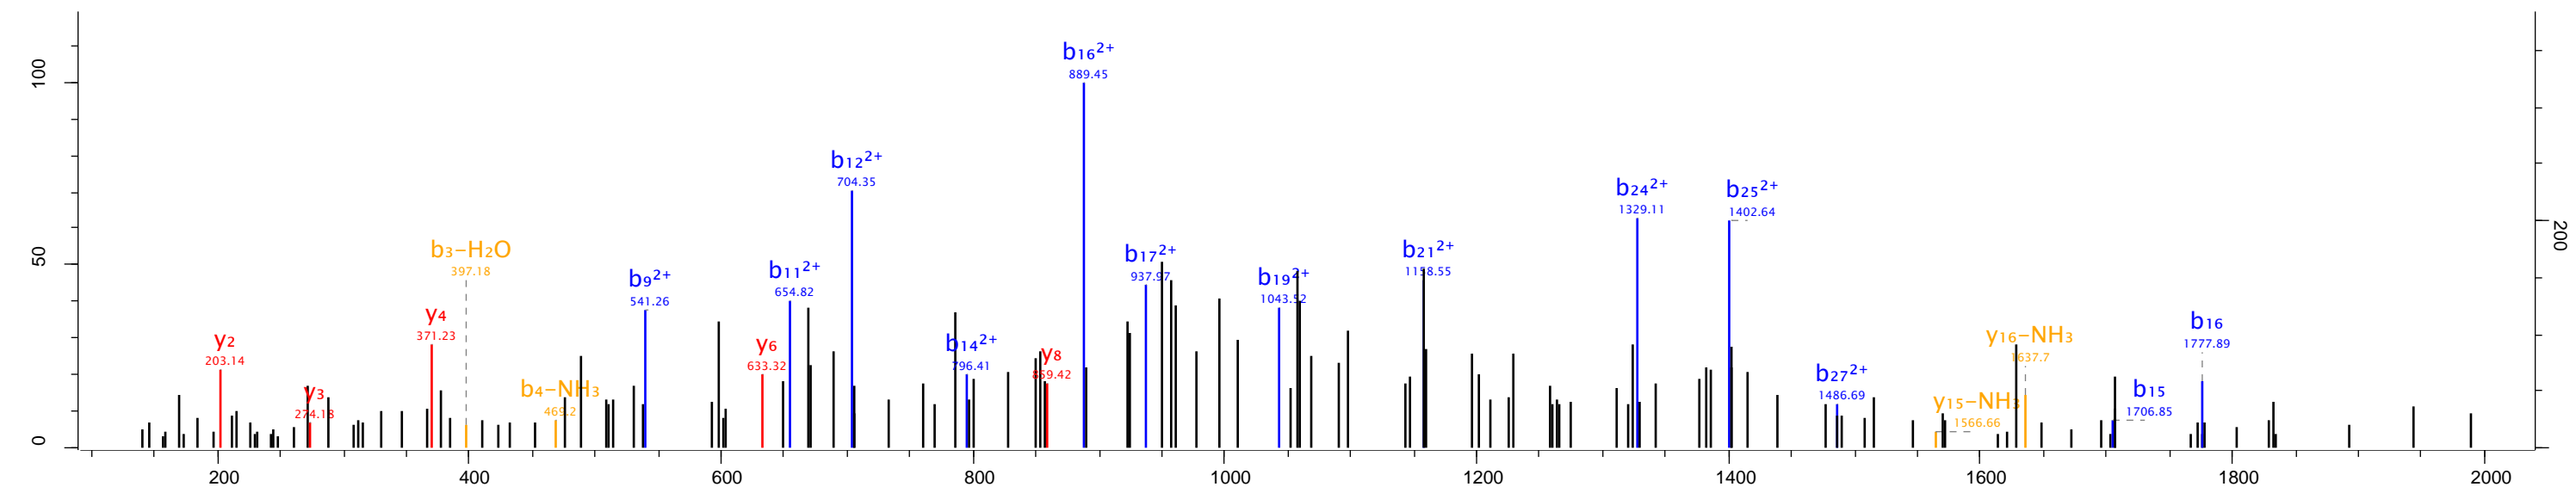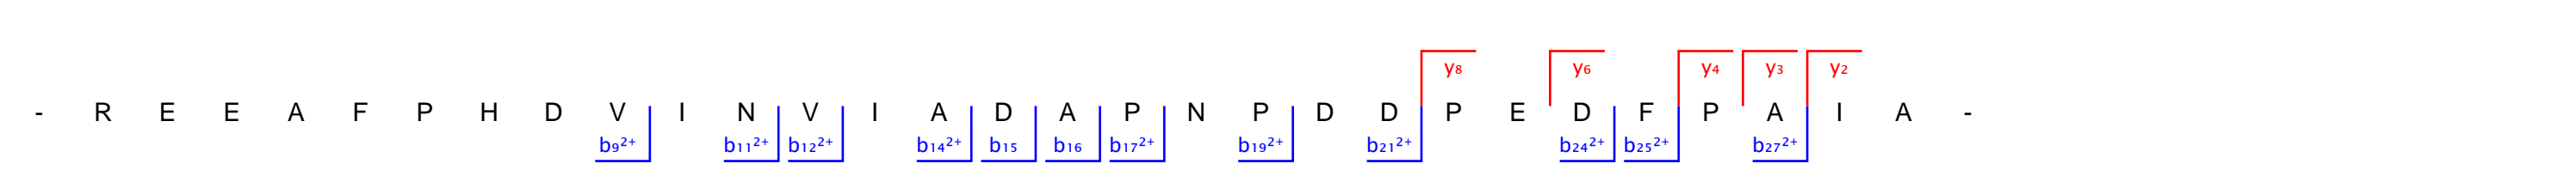



Raw file 2015-01-08\_CL03\_Blastomere-15 Scan 42201 Method ITMS; HCD Score 52.93 m/z 1059.17

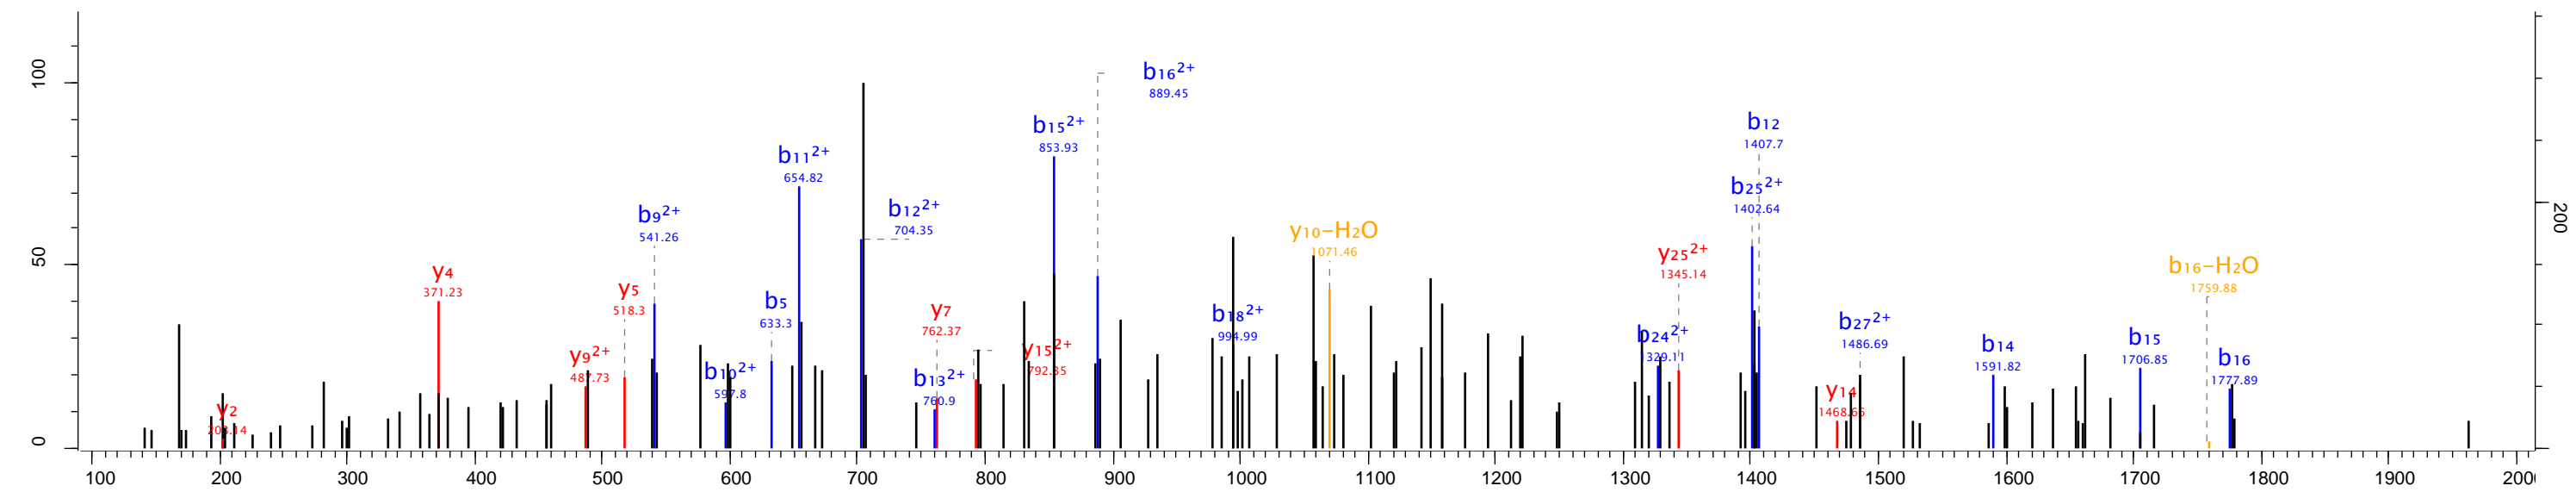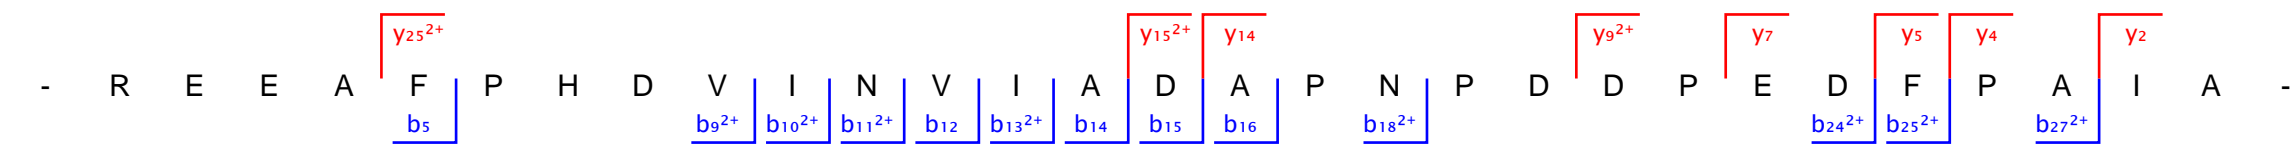

Spectral Annotation for Single-Peptide IDs between Single D11 Cells using Q-OT-LIT

Raw file  
 2015-01-08\_CL03\_Blastomere-15  
 Scan 42255 Method ITMS; HCD Score 43.88 m/z 1063.85

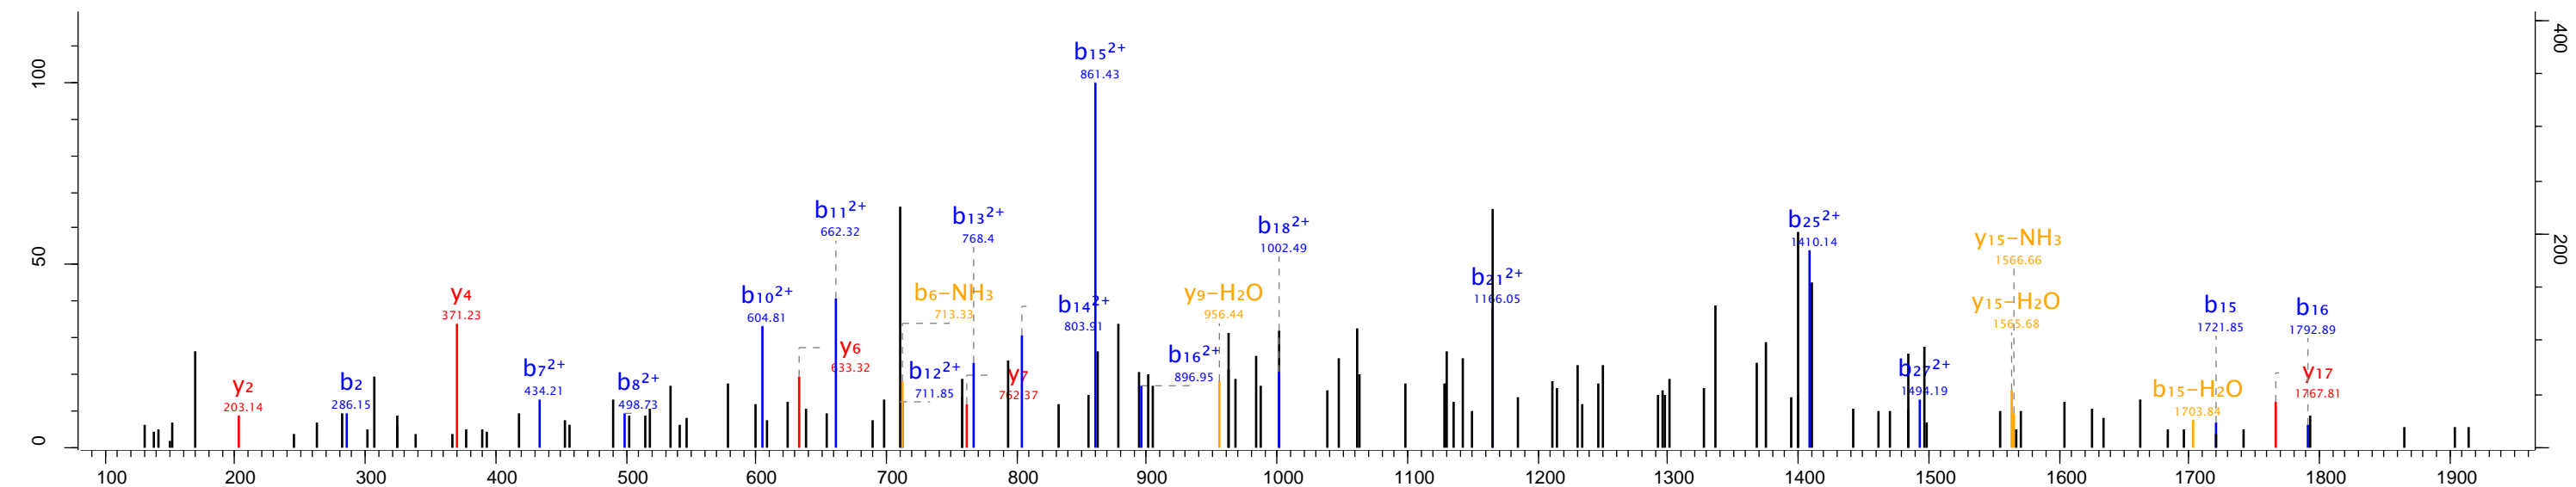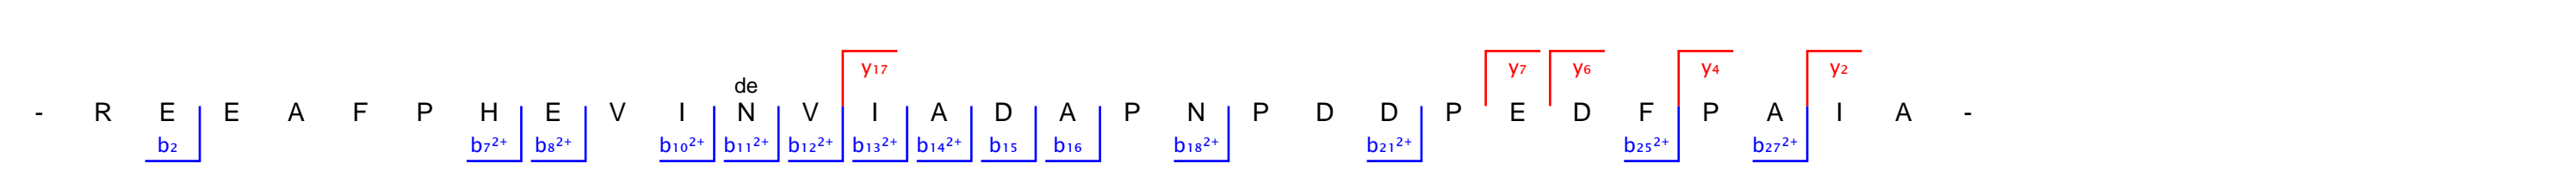

Spectral Annotation for Single-Peptide IDs between Single D11 Cells using Q-OT-LIT

Raw file 2015-01-08\_CL03\_Blastomere-15  
 Scan 42269 Method ITMS; HCD Score 37.94 m/z 1059.17

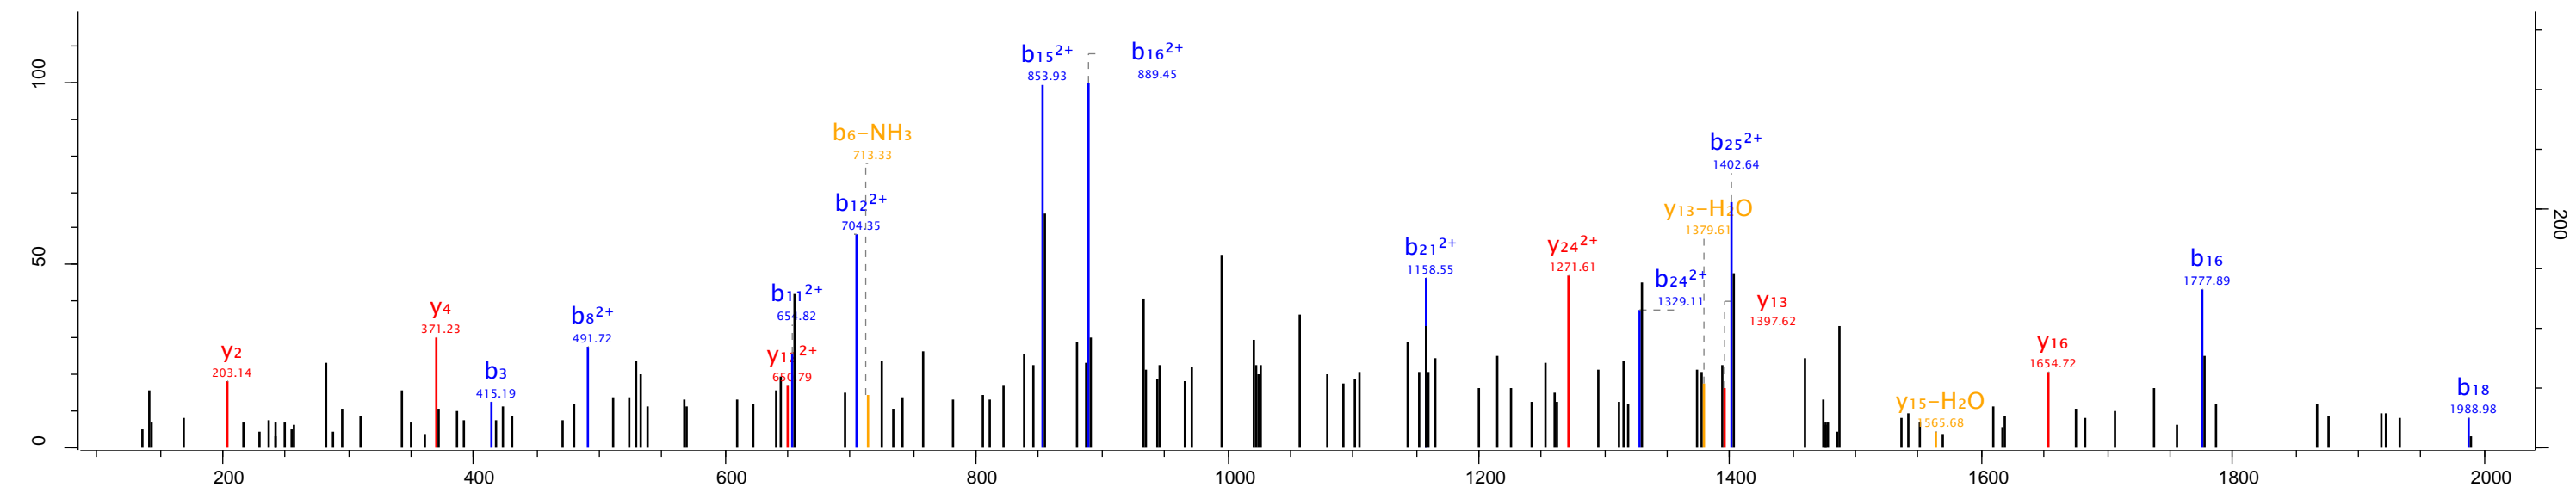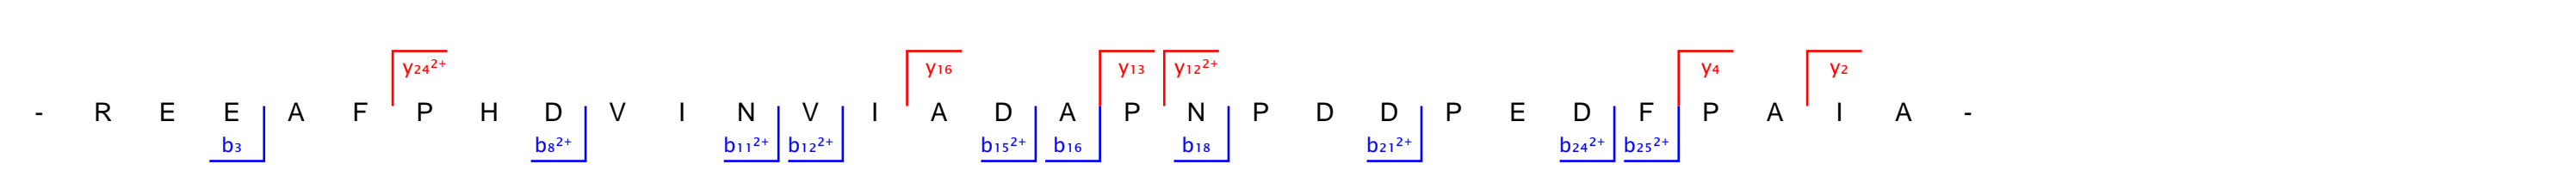

Raw file: 2015-01-08\_CL03\_Blastomere-15  
 Scan: 42346 Method: ITMS; HCD Score: 46.5 m/z: 1059.18

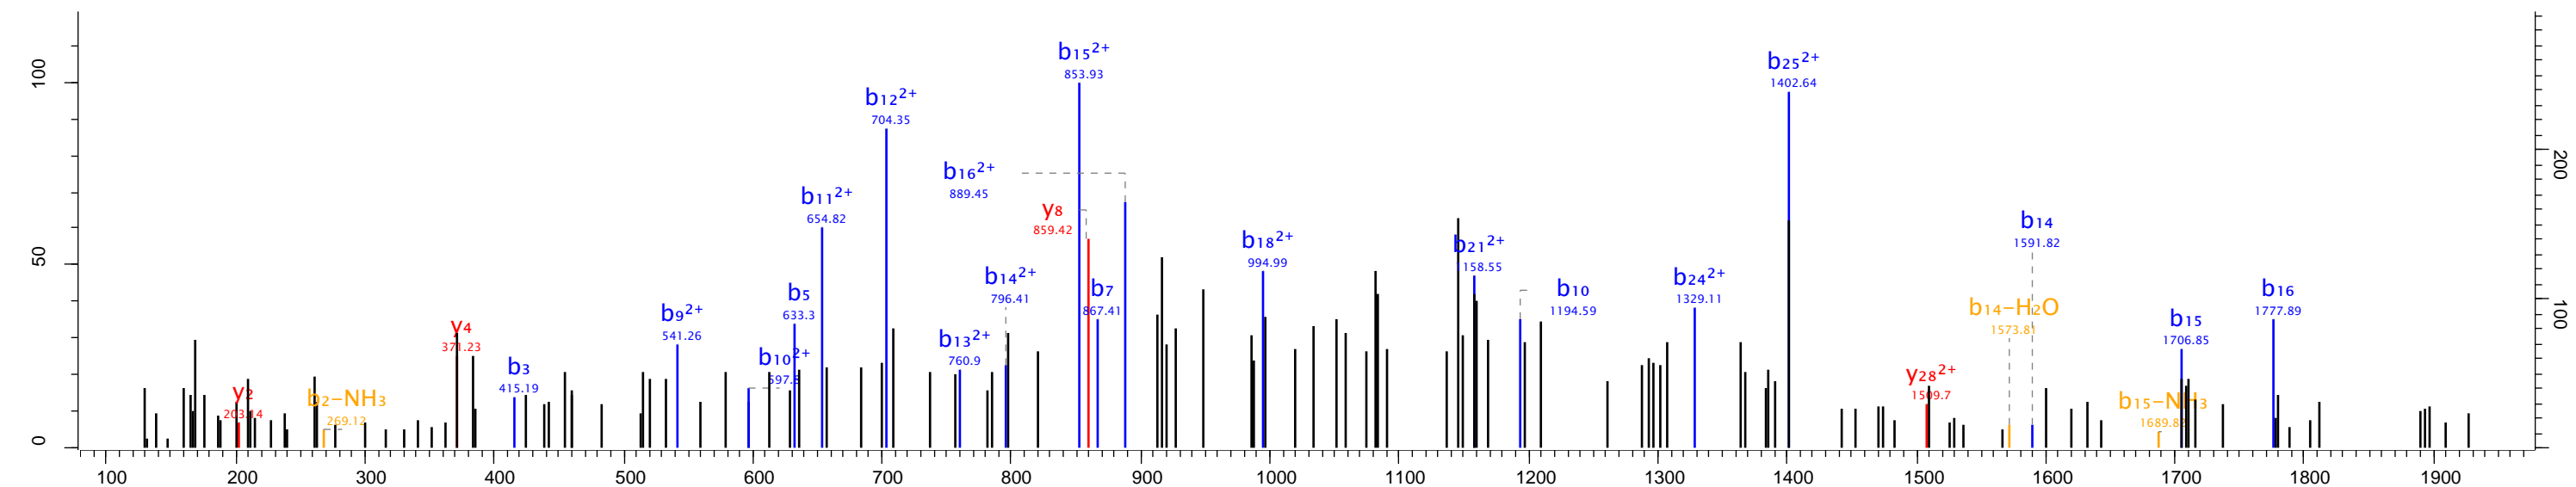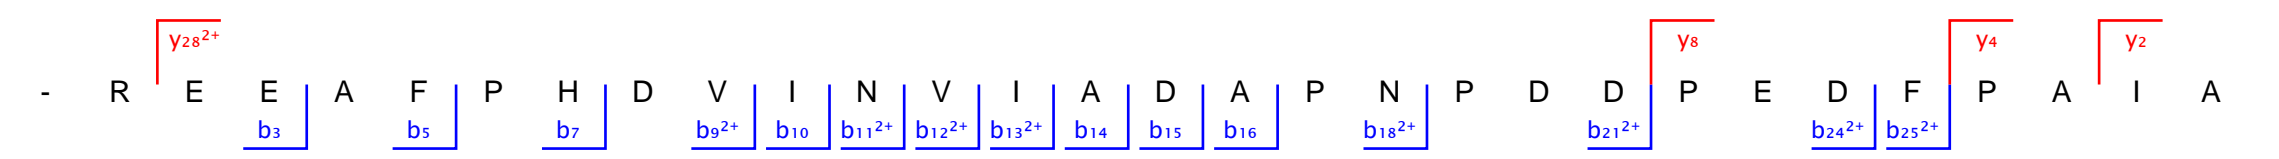

Spectral Annotation for Single-Peptide IDs between Single D11 Cells using Q-OT-LIT

Raw file 2015-01-08\_CL03\_Blastomere-15 Scan 42456 Method ITMS; HCD Score 23.59 m/z 1059.17

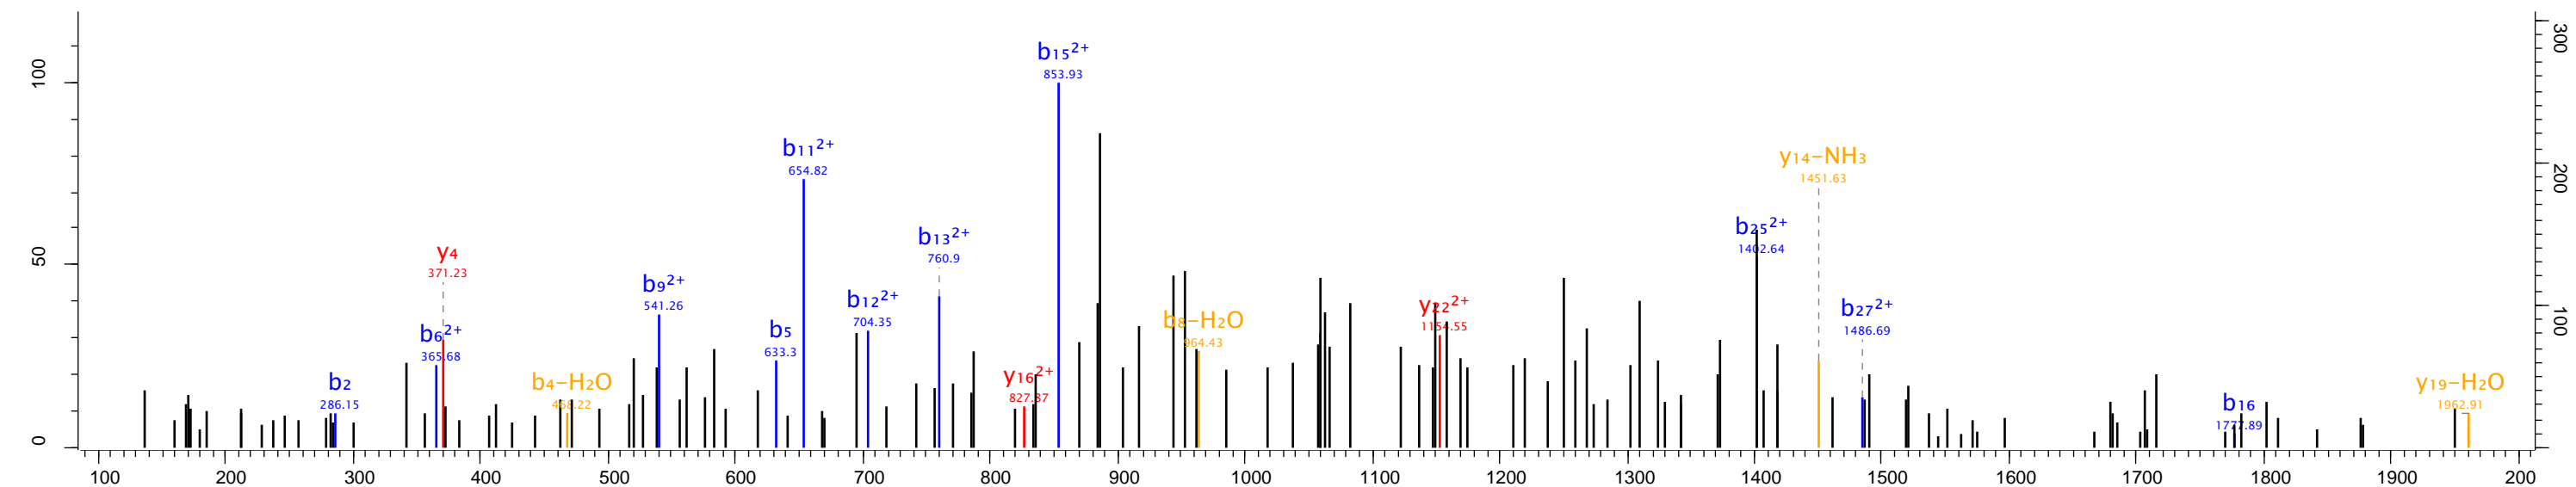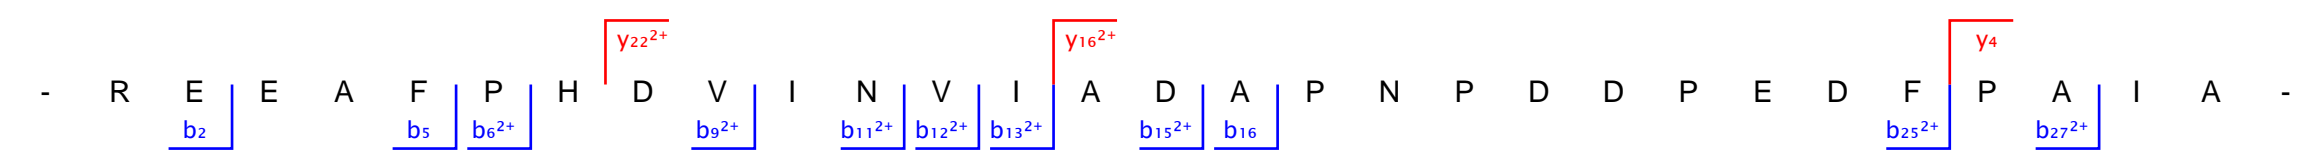

Raw file 2015-01-08\_CL03\_Blastomere-15 Scan 43573 Method ITMS; HCD Score 41.54 m/z 951.93

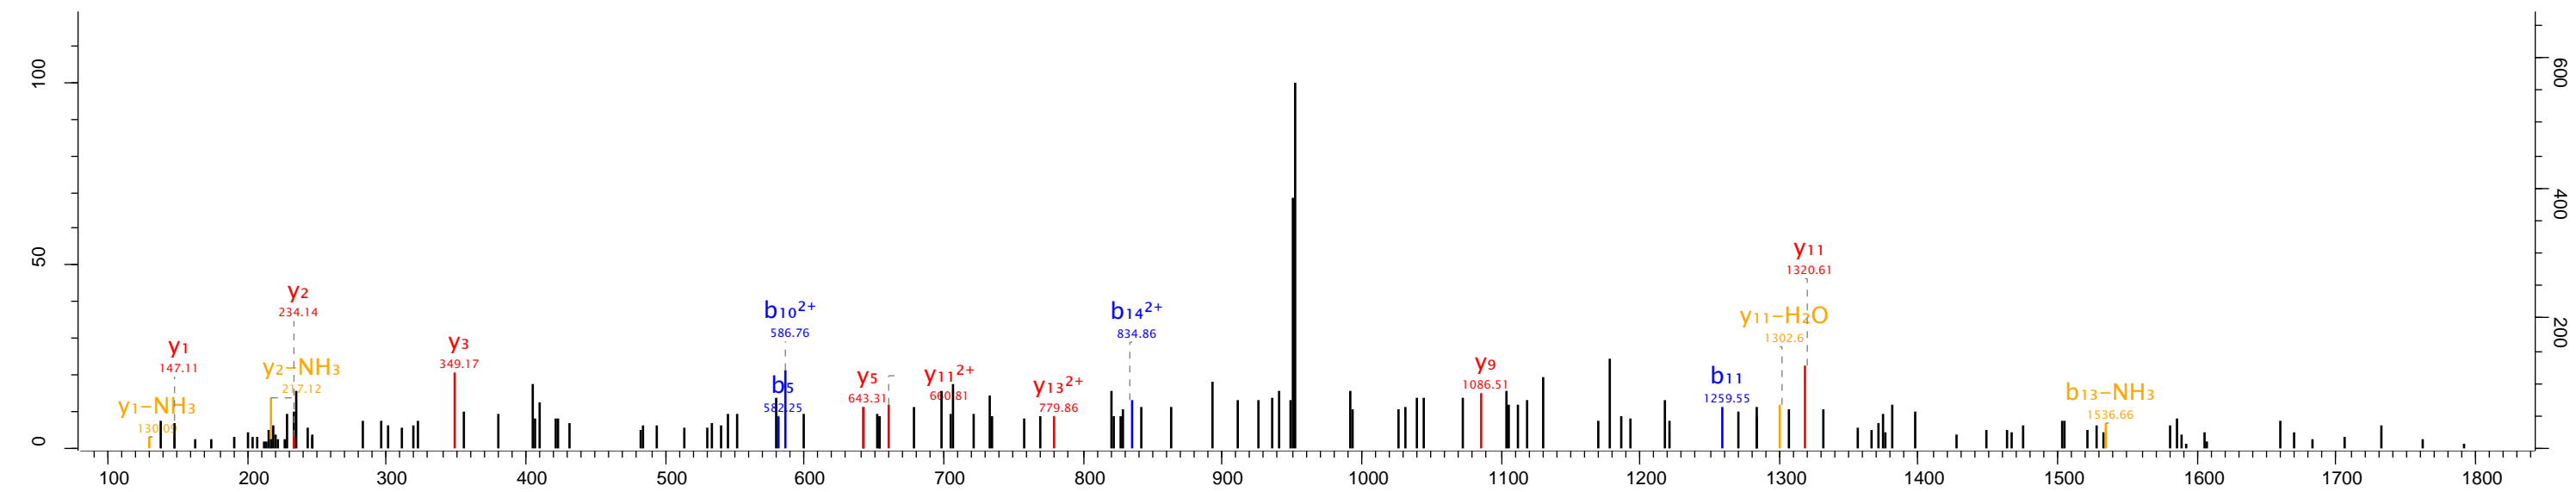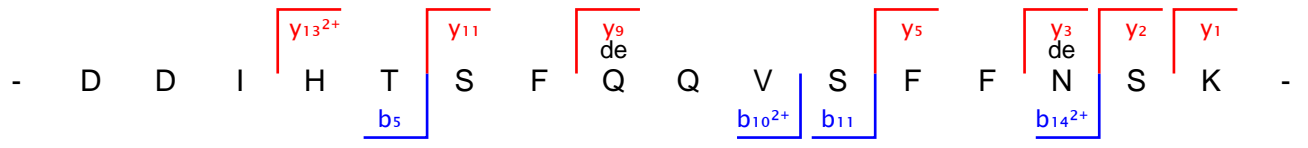

Spectral Annotation for Single-Peptide IDs between Single D11 Cells using Q-OT-LIT

Raw file 2015-01-08\_CL03\_Blastomere-15 Scan 44812 Method ITMS; HCD Score 31.39 m/z 705.05

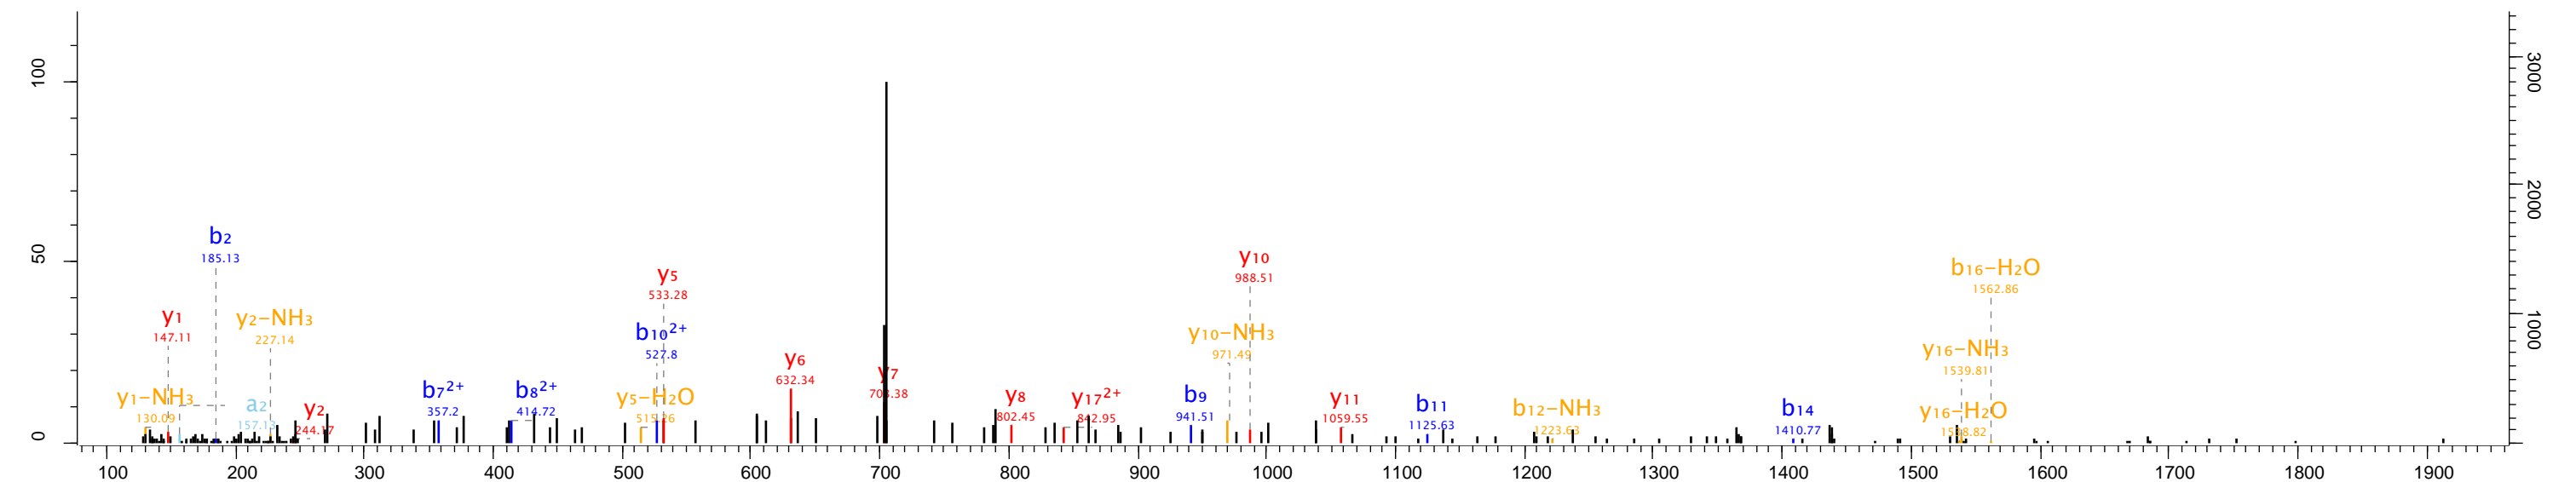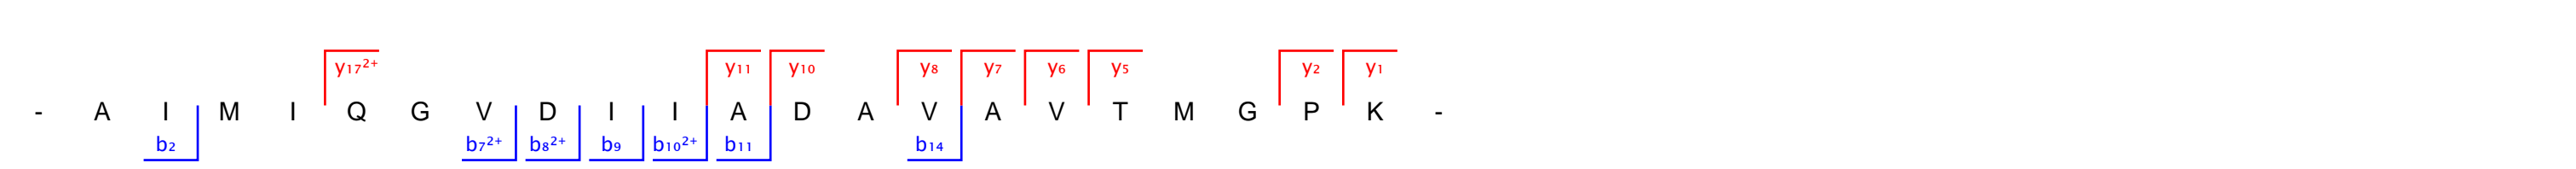

Raw file 2015-01-08\_CL03\_Blastomere-15 Scan 44842 Method ITMS; HCD Score 62 m/z 705.72

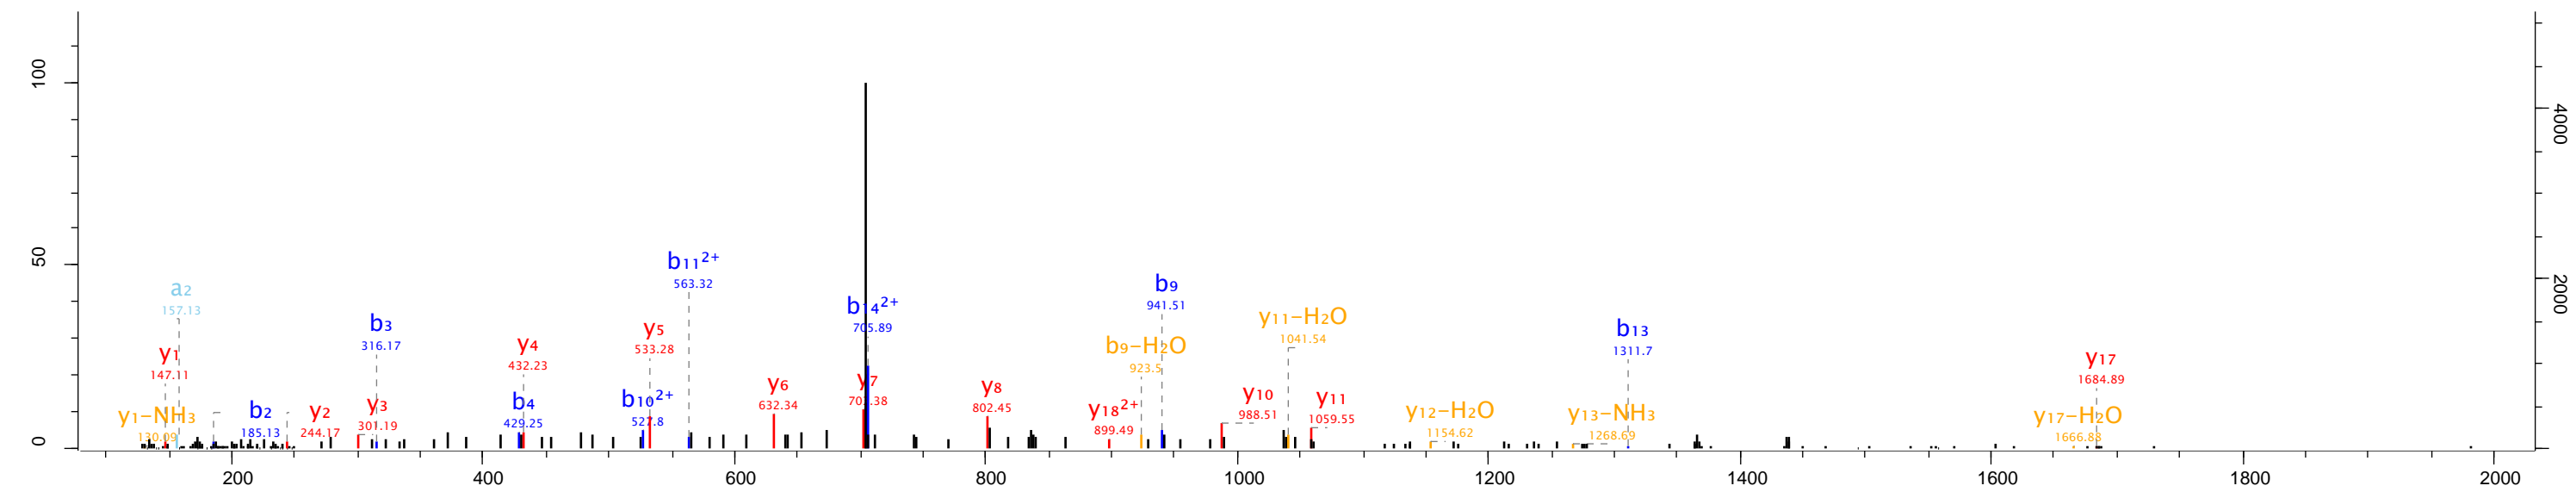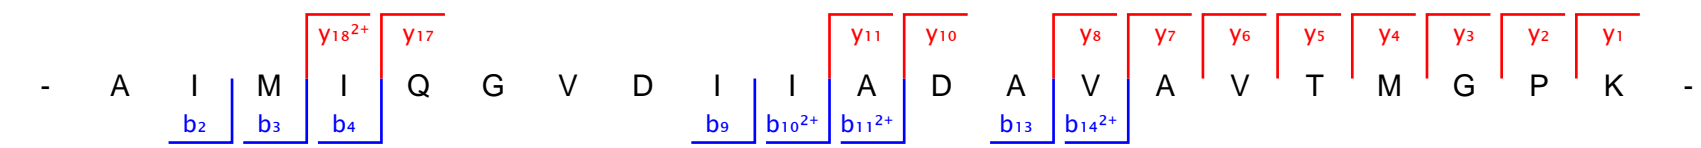

Spectral Annotation for Single-Peptide IDs between Single D11 Cells using Q-OT-LIT



Raw file  
 2015-01-08\_CL03\_Blastomere-15  
 Scan 44981 Method ITMS; HCD Score 45.22 m/z 639.33

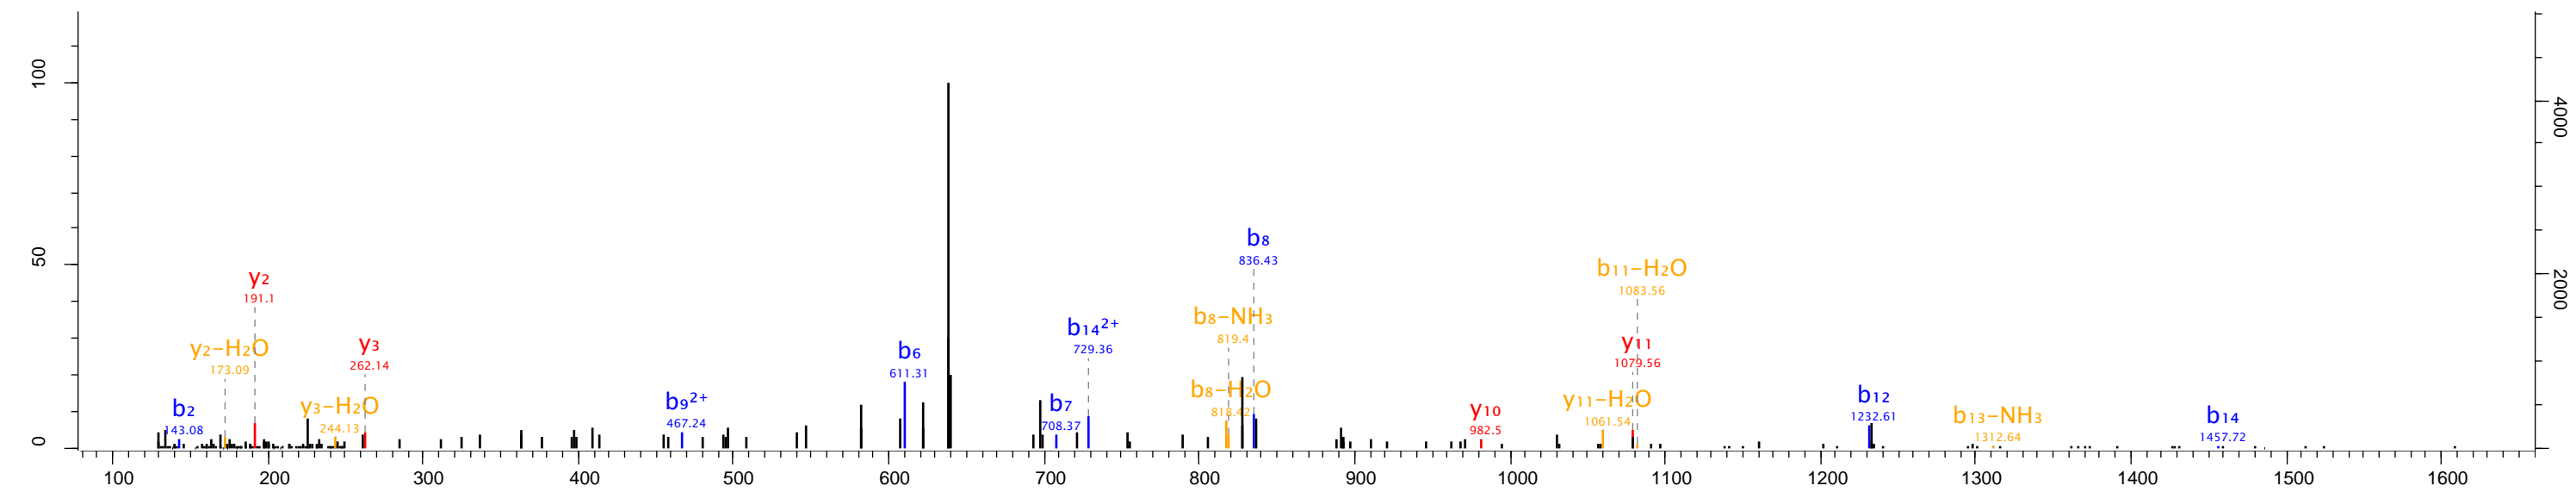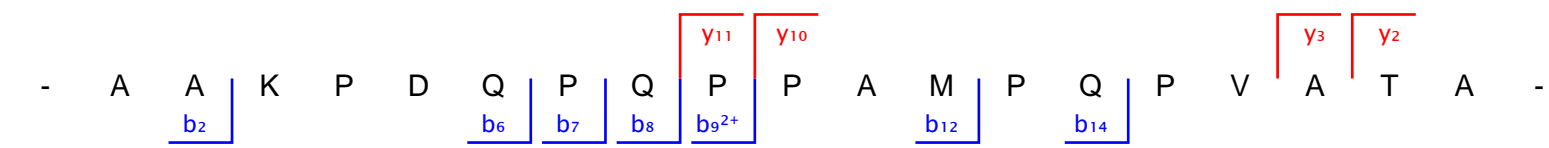

Spectral Annotation for Single-Peptide IDs between Single D11 Cells using Q-OT-LIT

Raw file 2015-01-08\_CL03\_Blastomere-15 Scan 44983 Method ITMS; HCD Score 116.85 m/z 678.69

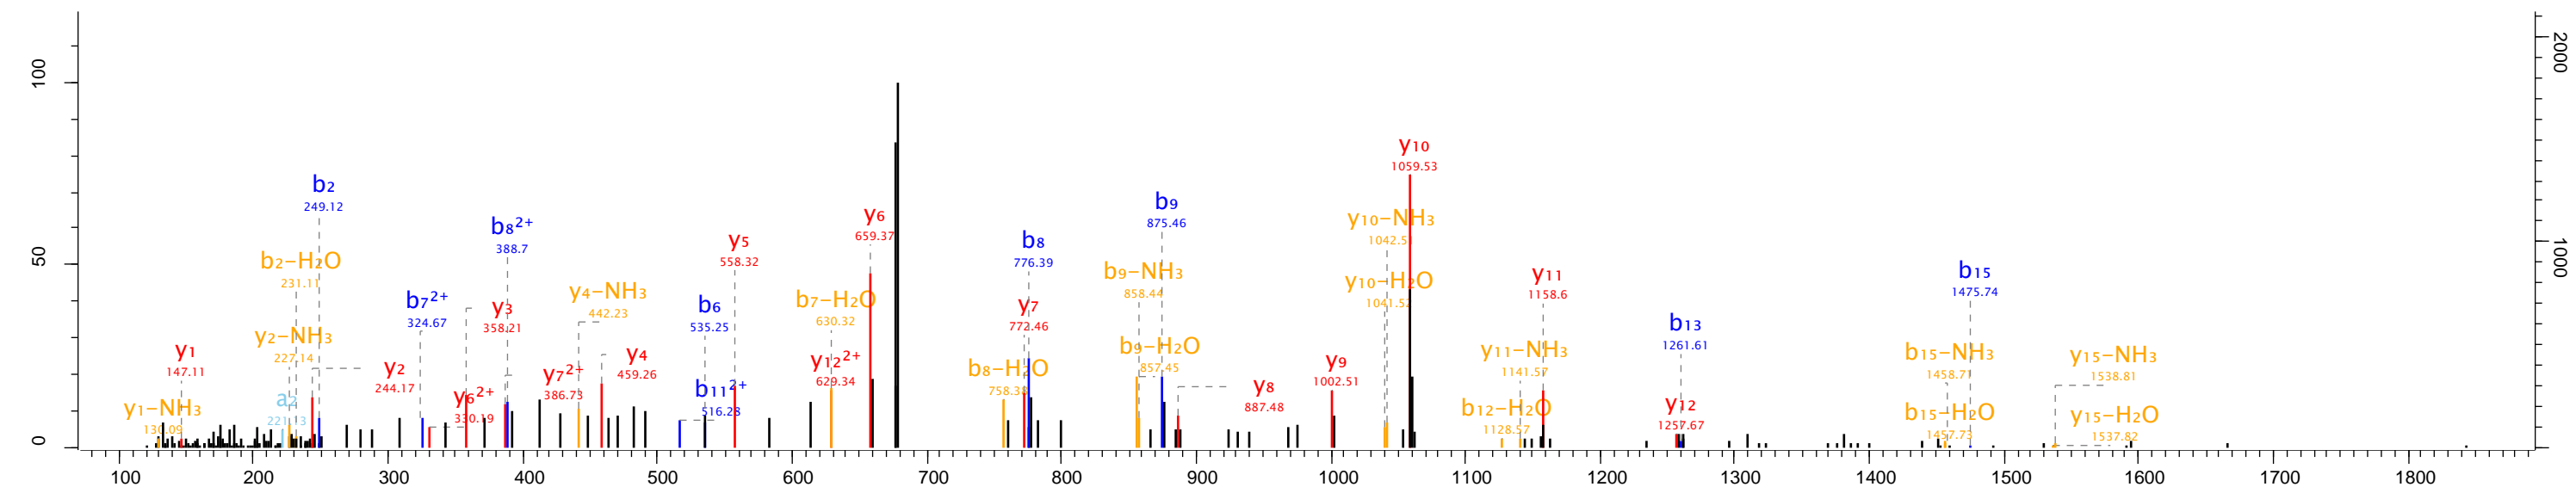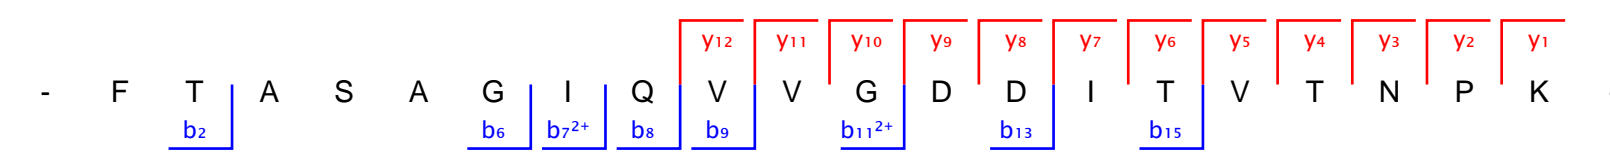

Spectral Annotation for Single-Peptide IDs between Single D11 Cells using Q-OT-LIT

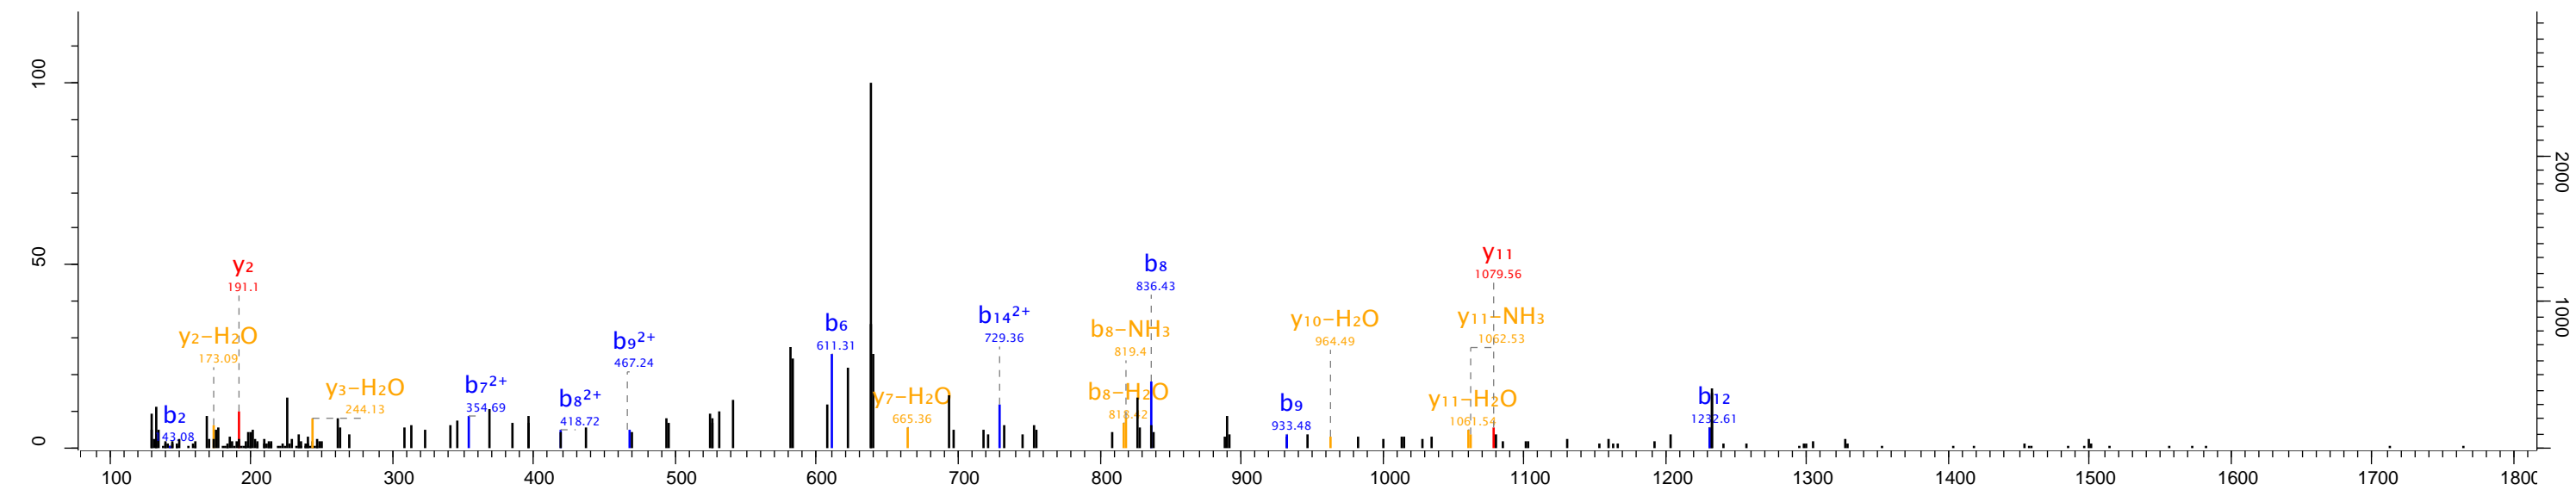

- A A K P D Q P Q P P A M P Q P V A T A -

Fragmentation sites are indicated by brackets below the peptide sequence:

- b<sub>2</sub> (A-A)
- b<sub>6</sub> (Q-P)
- b<sub>7</sub><sup>2+</sup> (P-Q)
- b<sub>8</sub> (Q-P)
- b<sub>9</sub> (P-P)
- b<sub>12</sub> (M-P)
- b<sub>14</sub><sup>2+</sup> (Q-P)
- y<sub>11</sub> (P-P)
- y<sub>2</sub> (A-T)

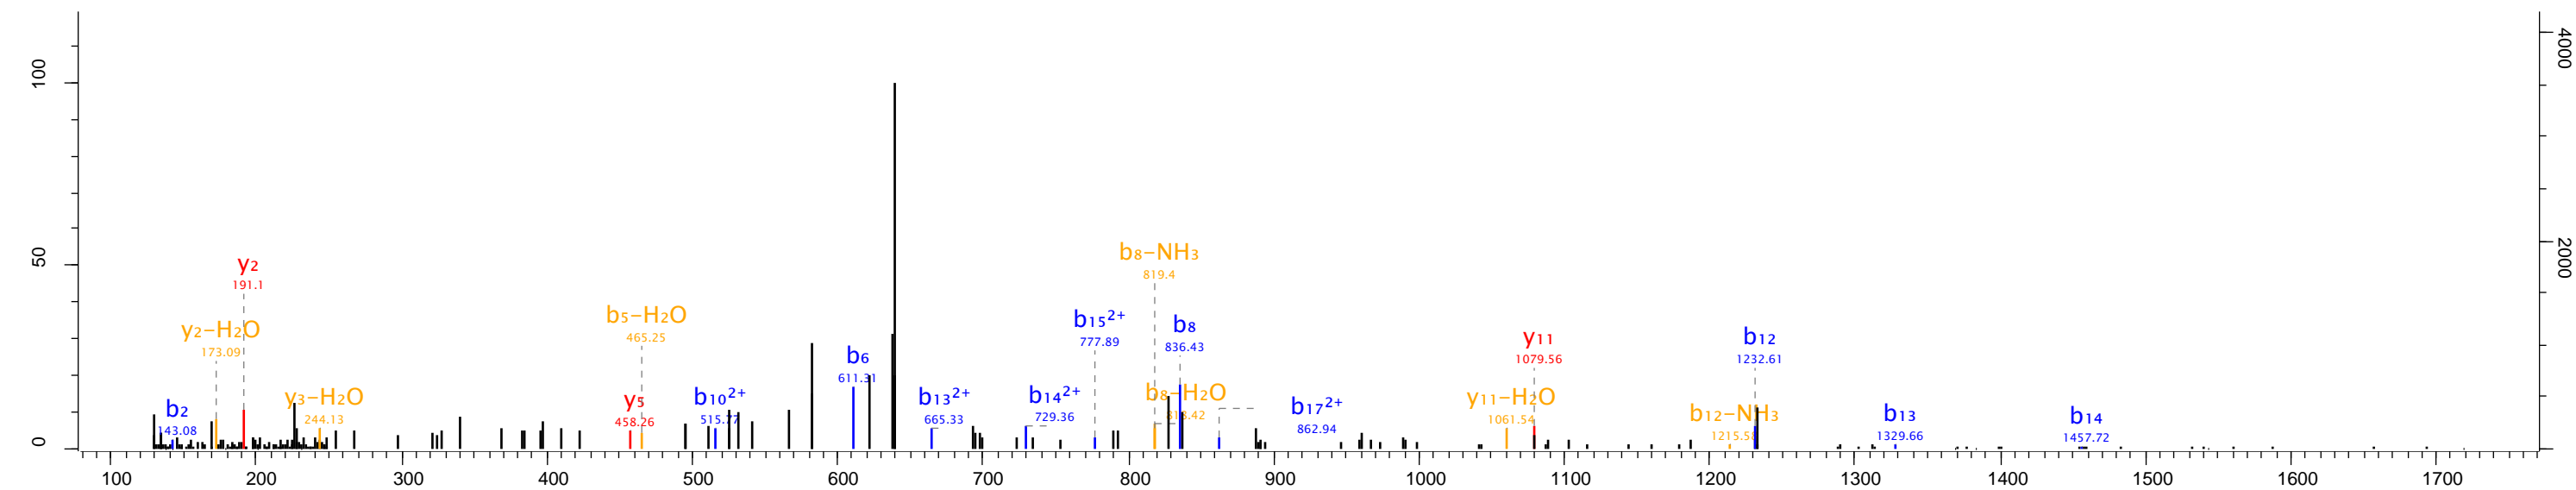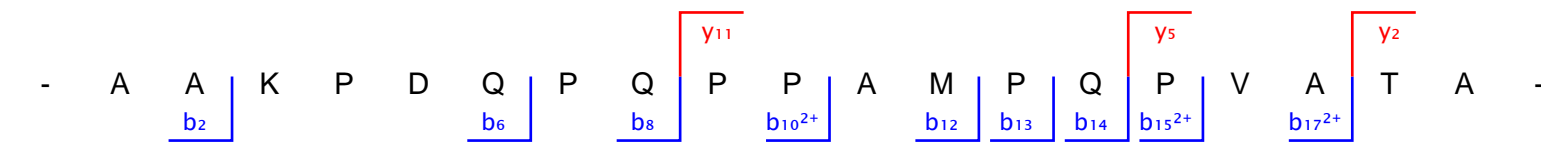

Raw file Scan Method Score m/z  
 2015-01-08\_CL03\_Blastomere-15 45252 ITMS; HCD 54.15 678.69

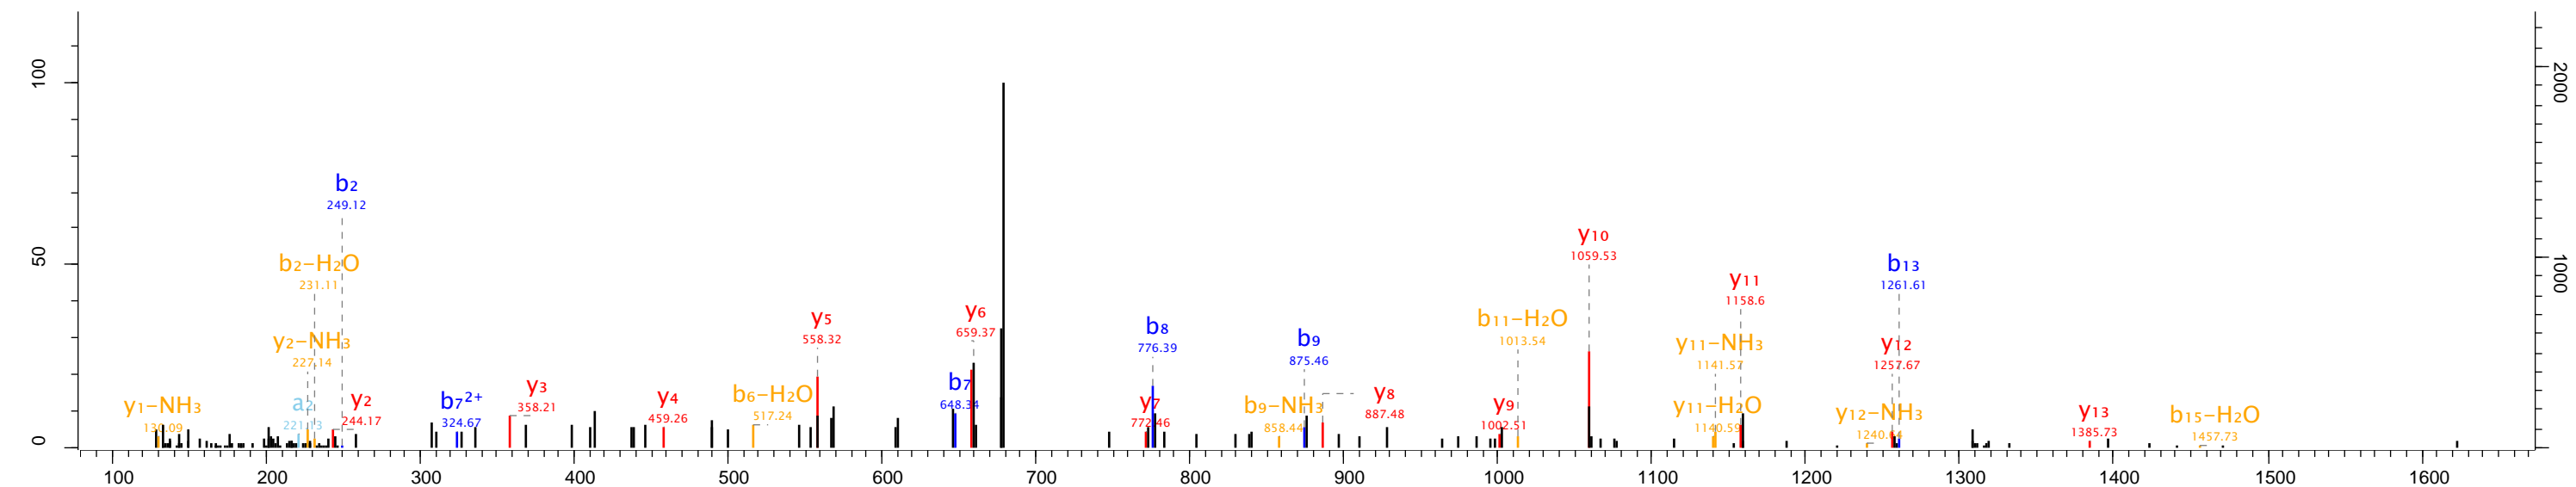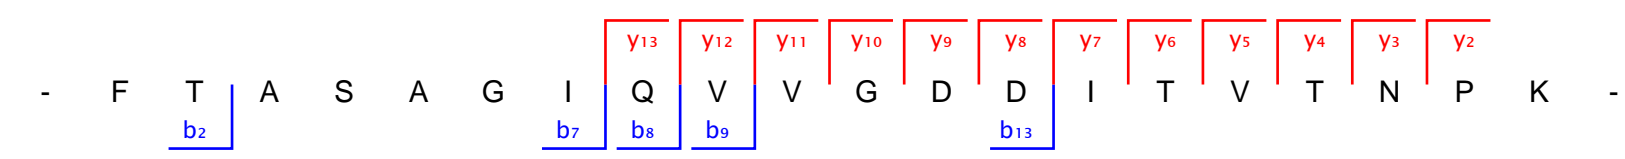

Spectral Annotation for Single-Peptide IDs between Single D11 Cells using Q-OT-LIT

Raw file 2015-01-08\_CL03\_Blastomere-15 Scan 45255 Method ITMS; HCD Score 51.5 m/z 638.99

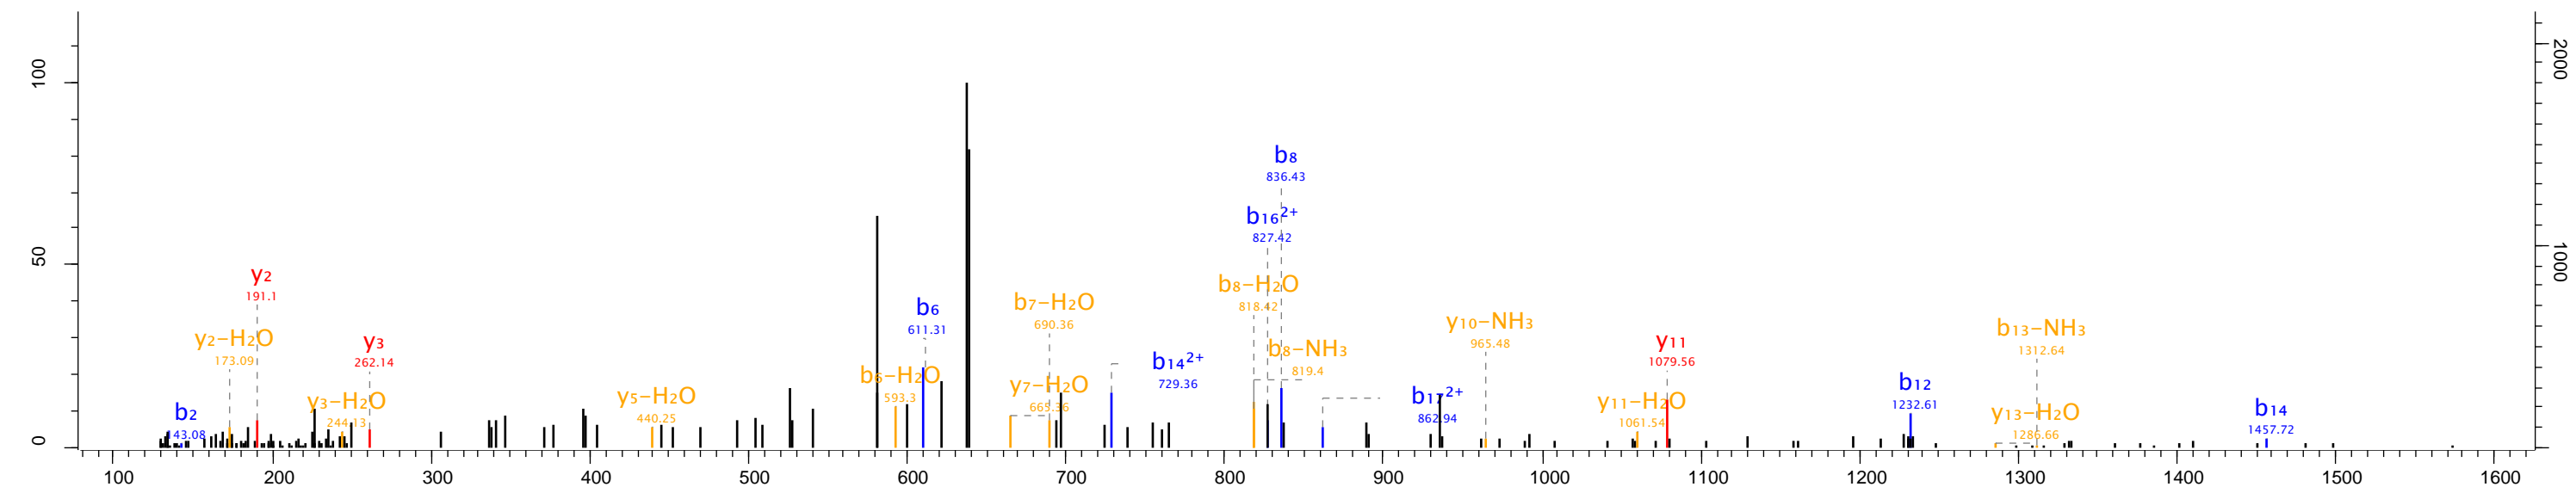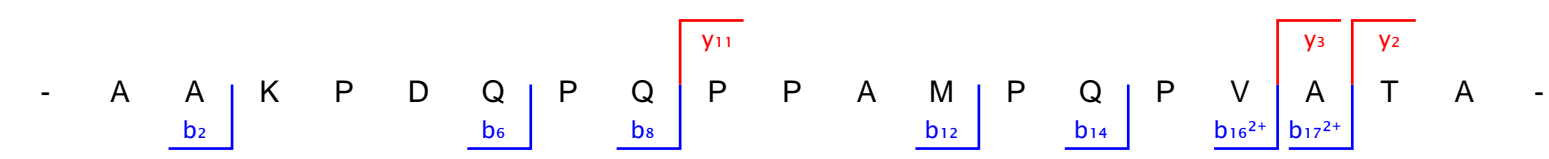

Spectral Annotation for Single-Peptide IDs between Single D11 Cells using Q-OT-LIT

Raw file 2015-01-08\_CL03\_Blastomere-15 Scan 45271 Method ITMS; HCD Score 98.44 m/z 678.69

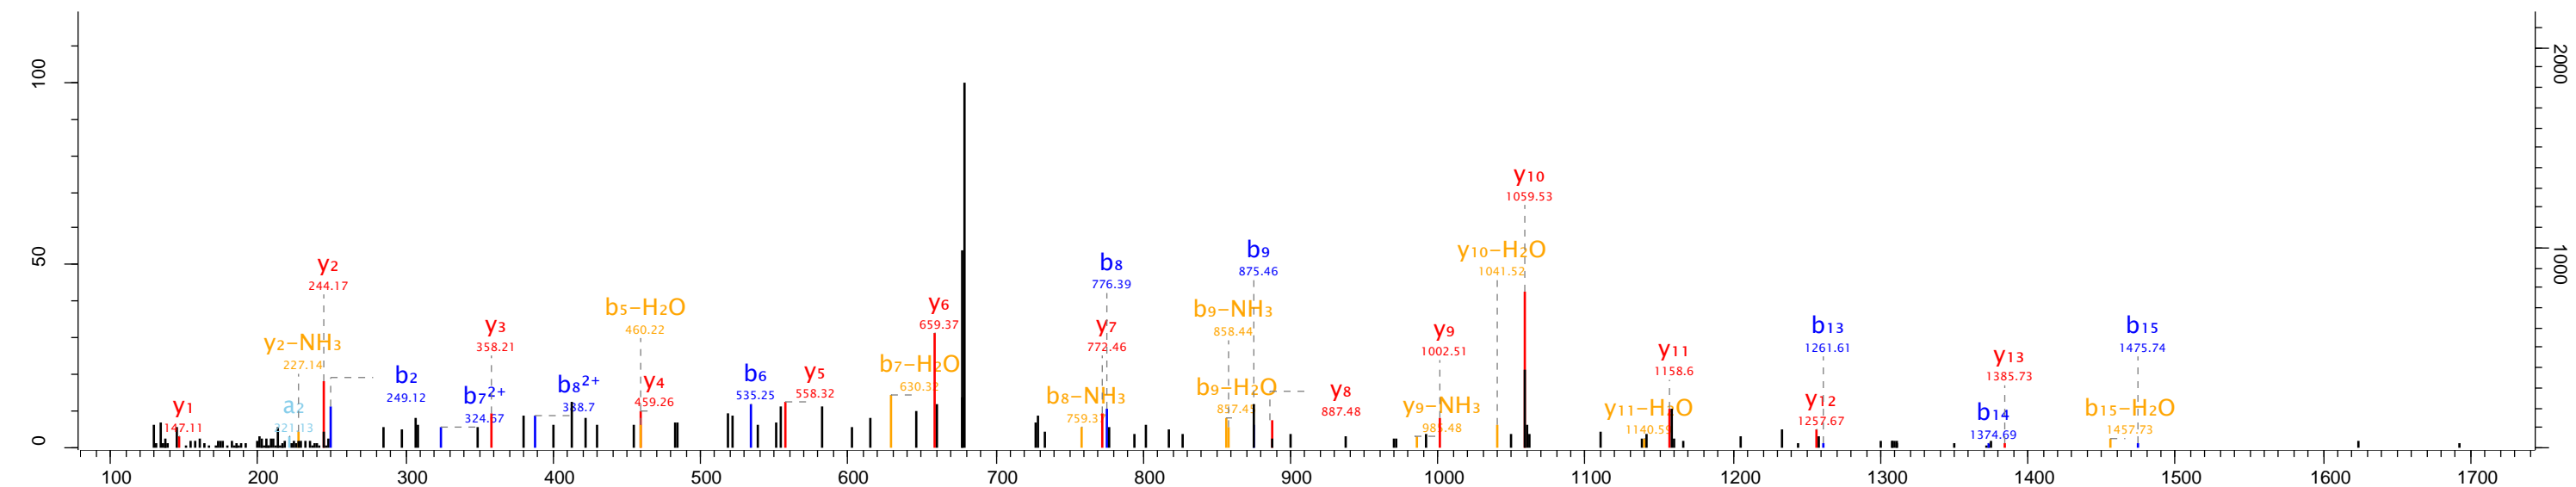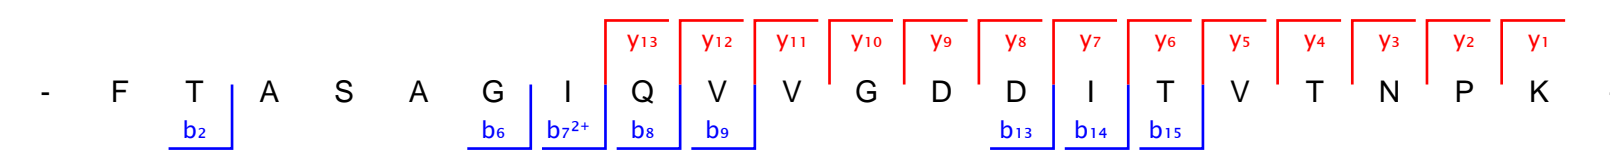

Spectral Annotation for Single-Peptide IDs between Single D11 Cells using Q-OT-LIT

Raw file 2015-01-08\_CL03\_Blastomere-15 Scan 45289 Method ITMS; HCD Score 65.16 m/z 678.69

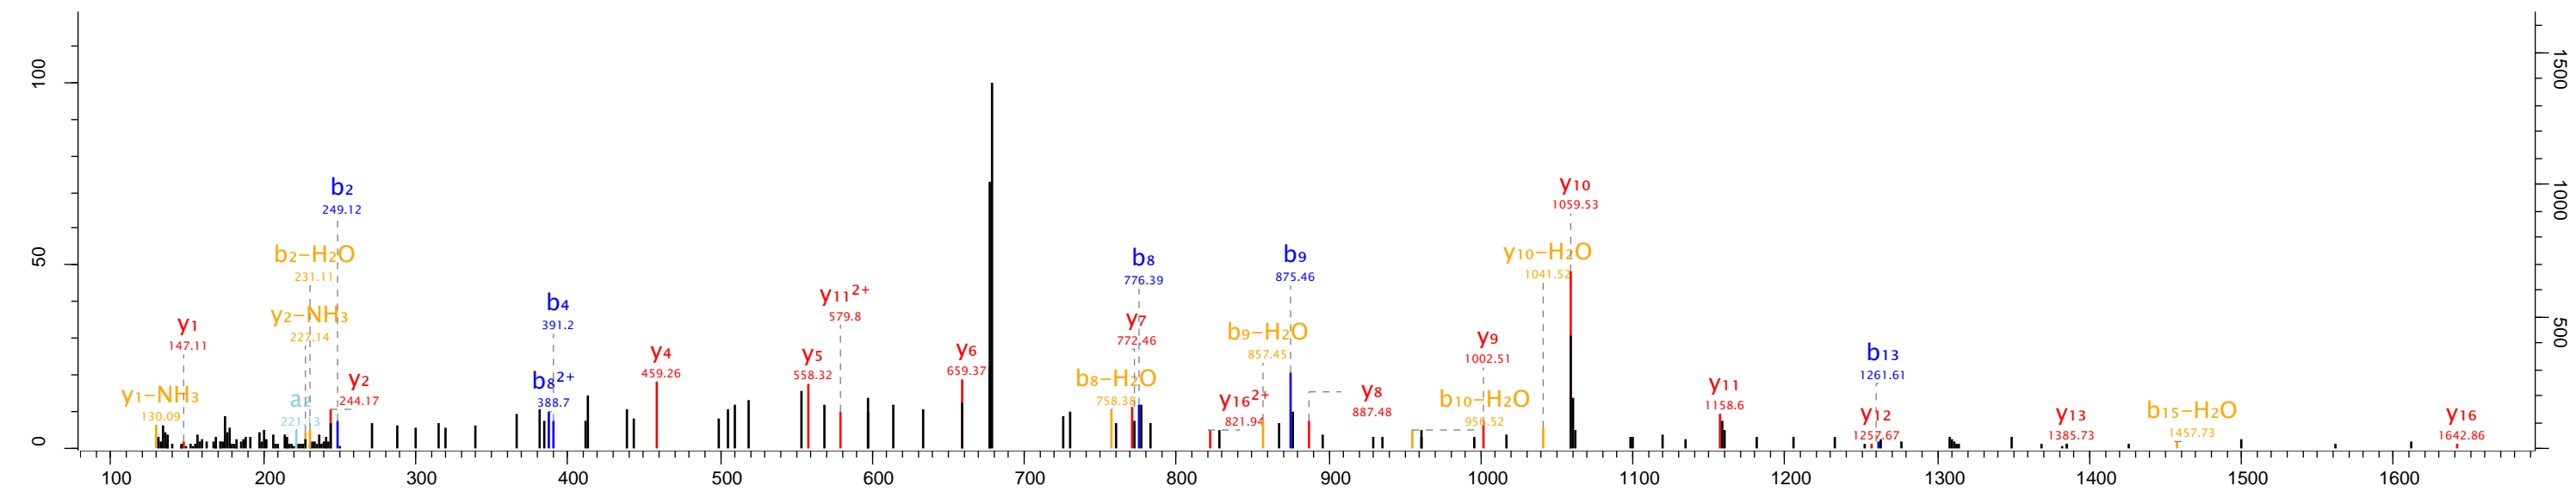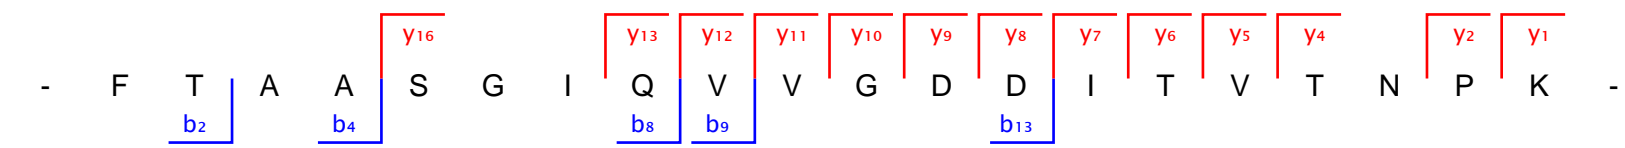

Spectral Annotation for Single-Peptide IDs between Single D11 Cells using Q-OT-LIT



Raw file 2015-01-08\_CL03\_Blastomere-15 Scan 45574 Method ITMS; HCD Score 42.24 m/z 1079.49

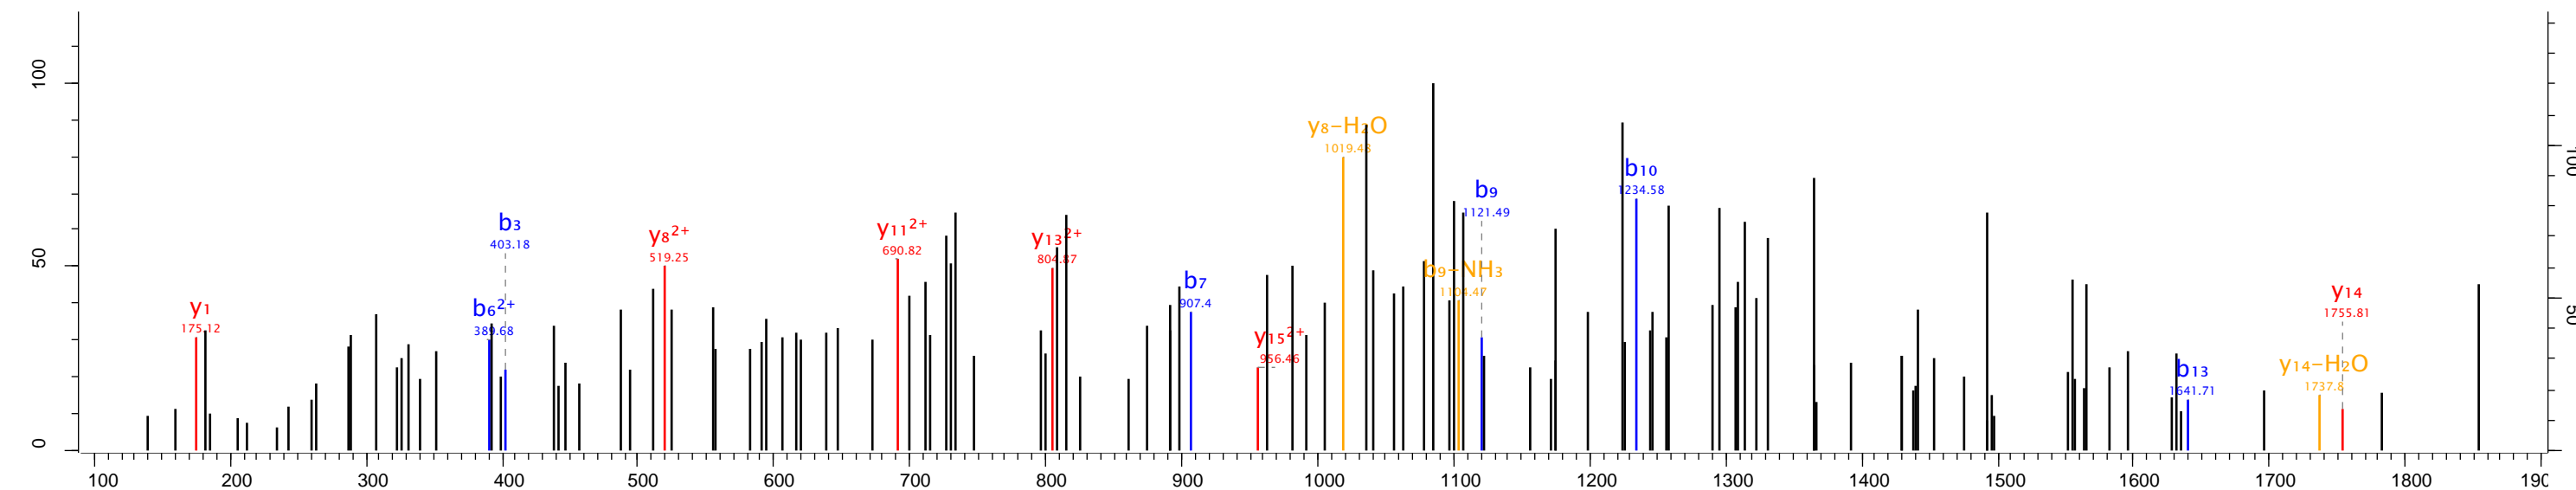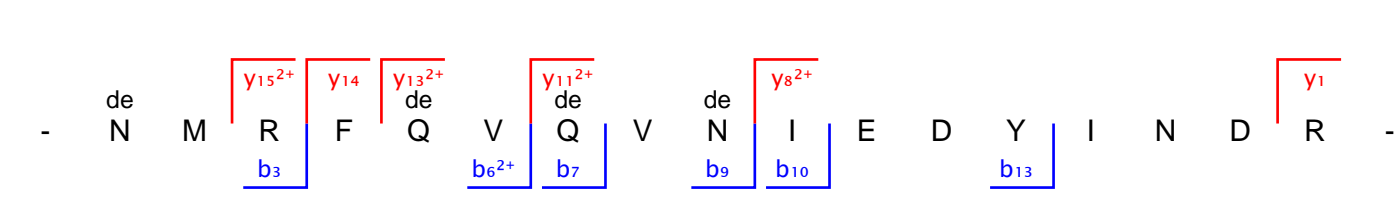

Spectral Annotation for Single-Peptide IDs between Single D11 Cells using Q-OT-LIT

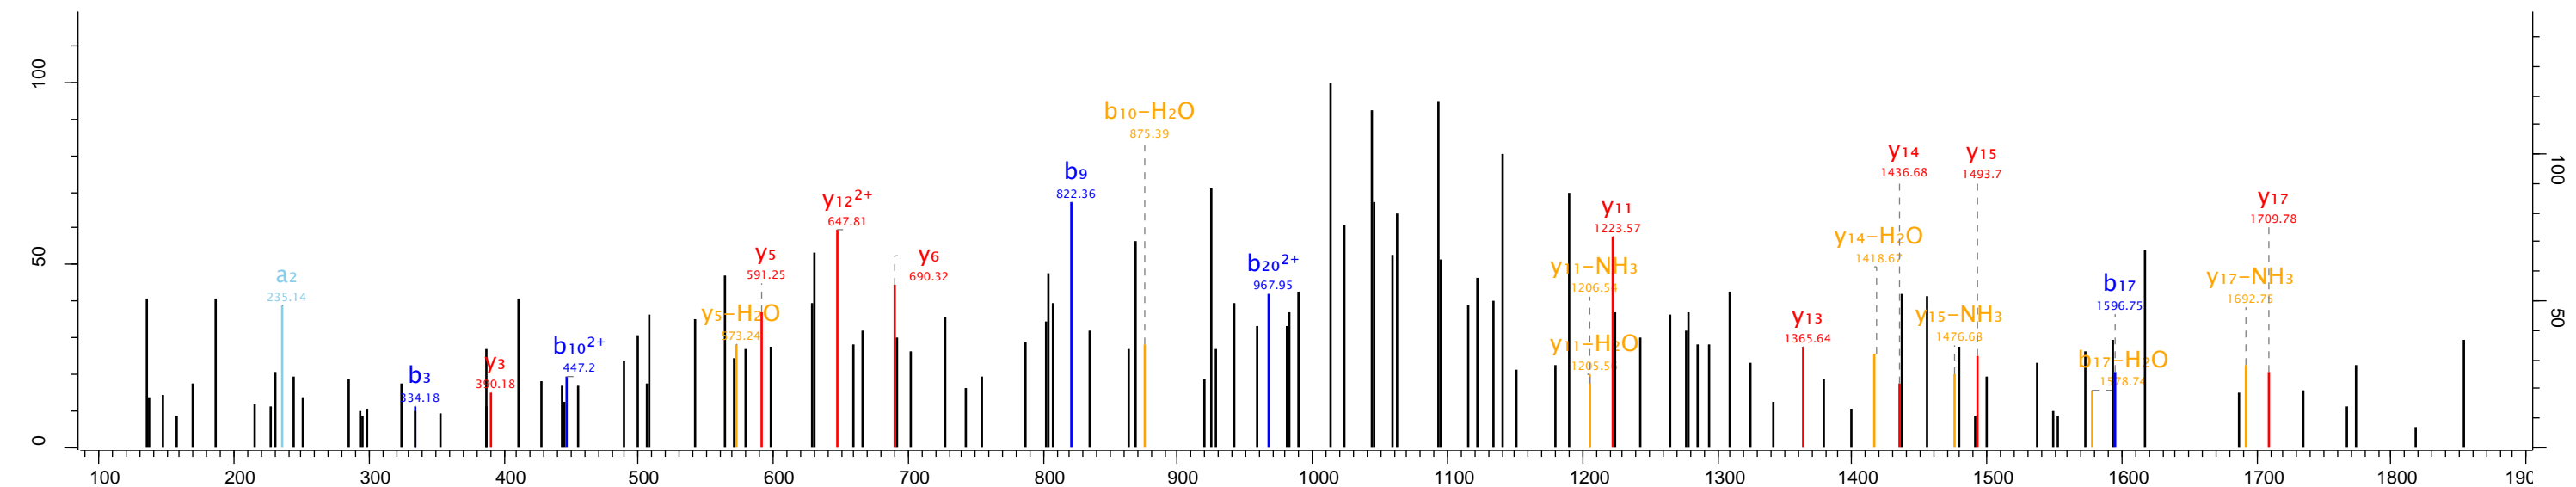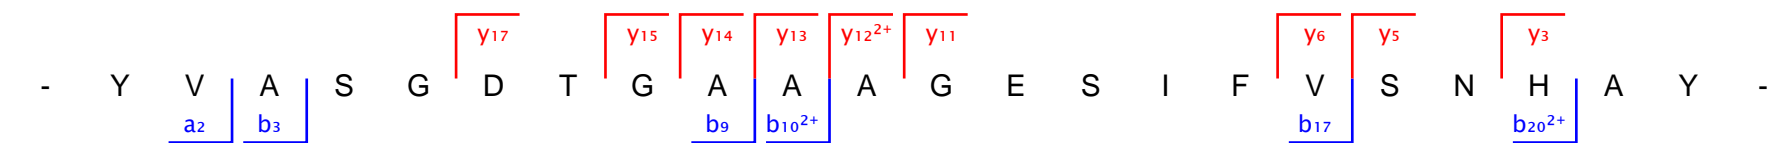

Raw file Scan Method Score m/z  
 2015-01-08\_CL03\_Blastomere-15 46864 ITMS; HCD 42.47 687.4

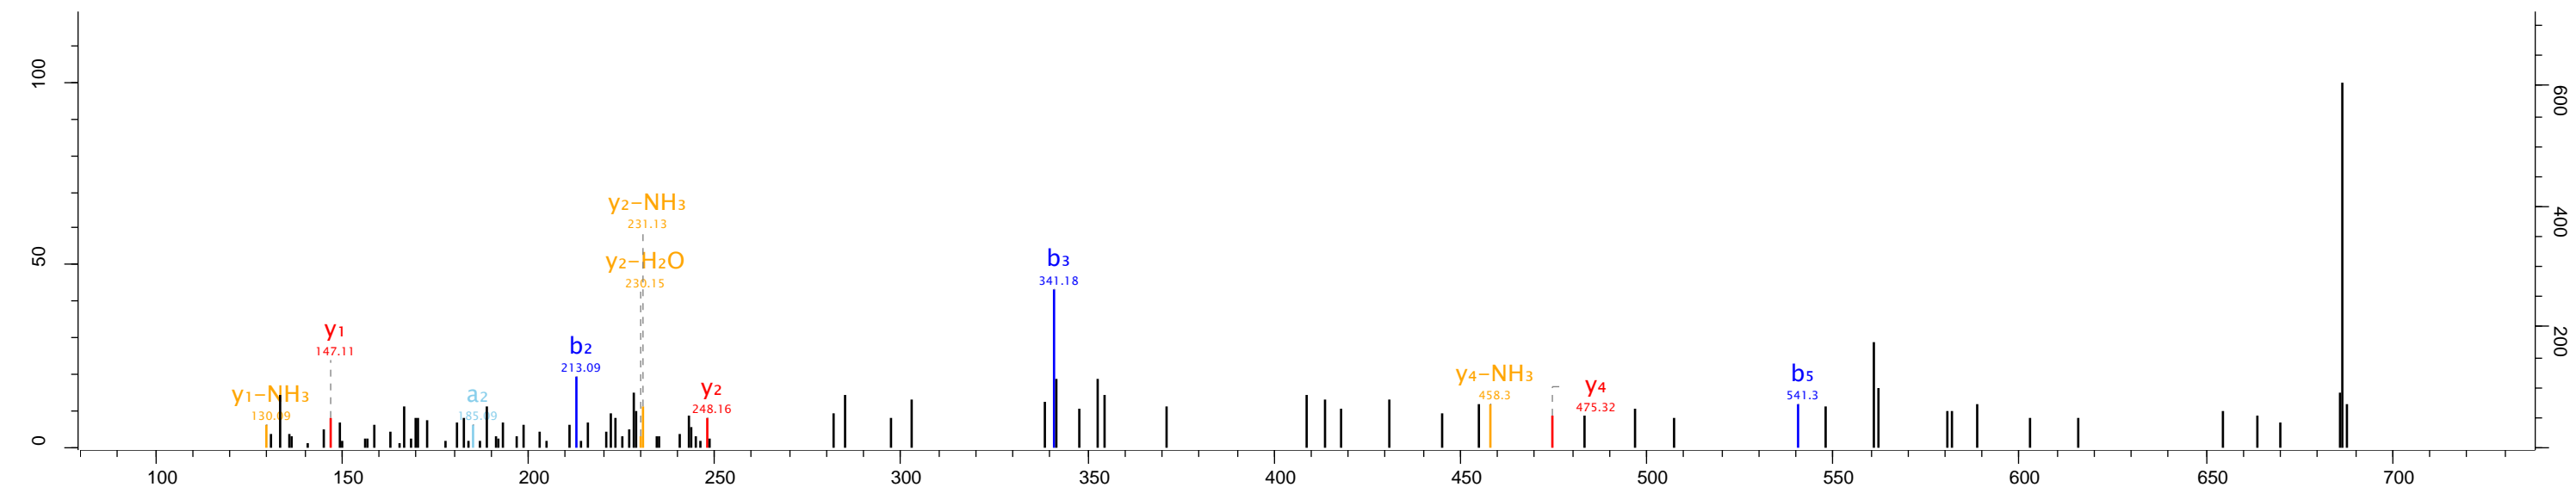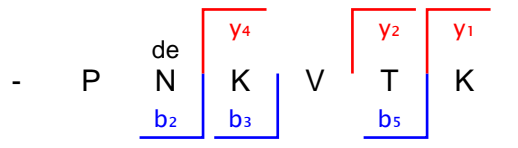

Raw file 2015-01-08\_CL03\_Blastomere-15  
 Scan 46949 Method ITMS; HCD Score 52.32 m/z 773.38

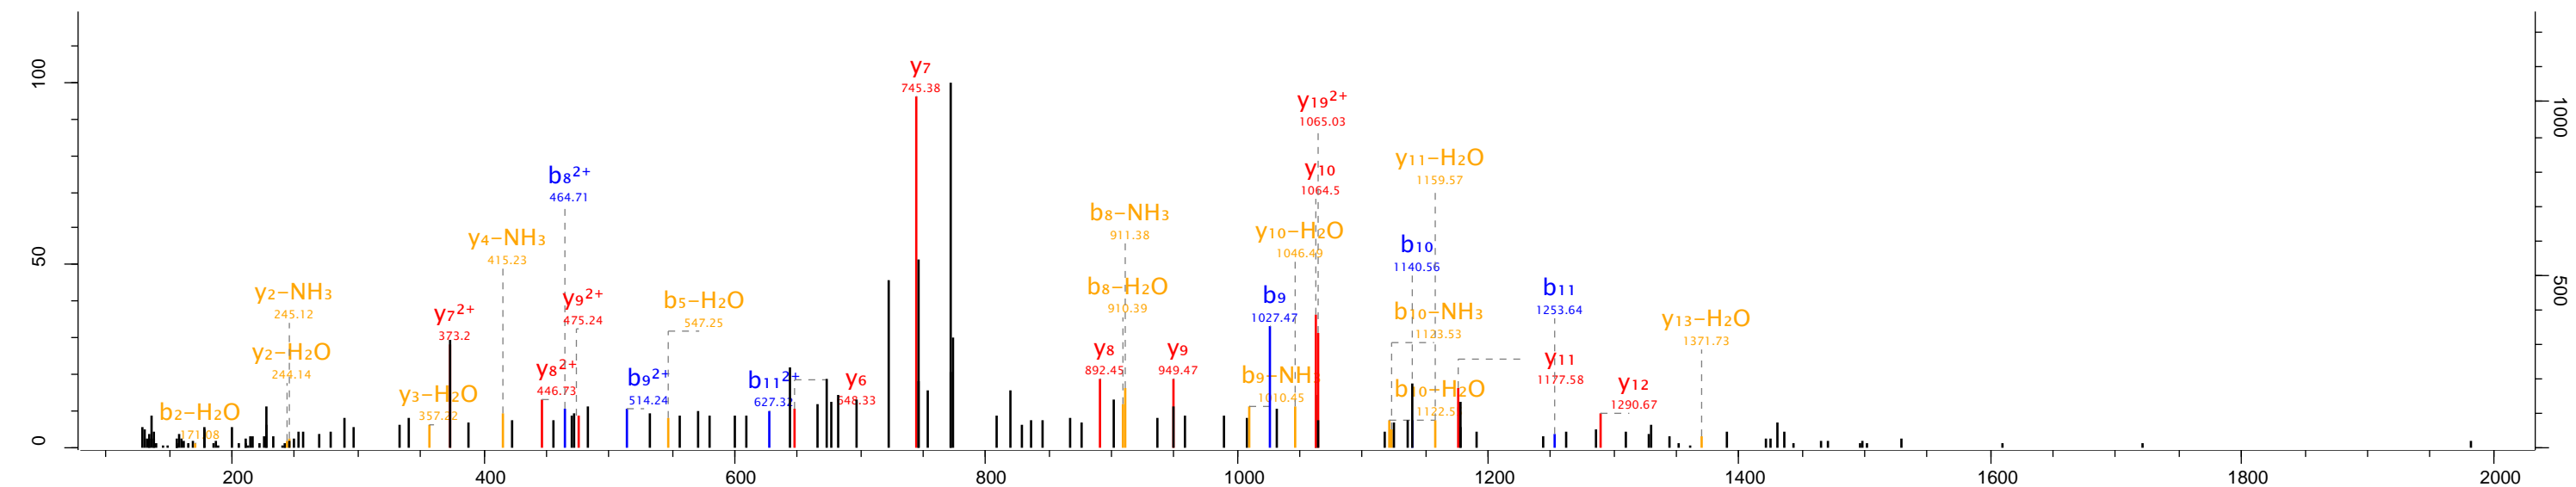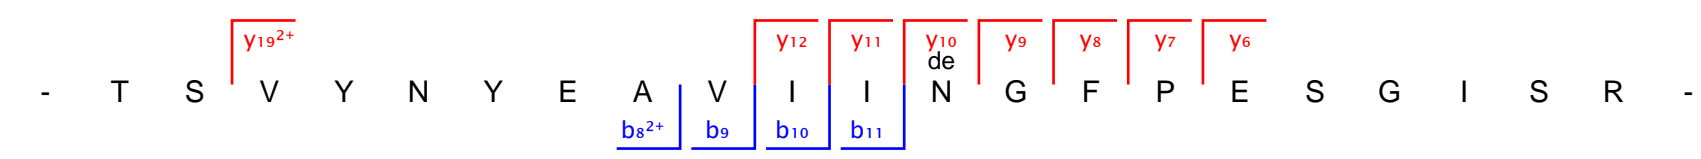

Spectral Annotation for Single-Peptide IDs between Single D11 Cells using Q-OT-LIT

Raw file 2015-01-08\_CL03\_Blastomere-15 Scan 47217 Method ITMS; HCD Score 42.03 m/z 773.38

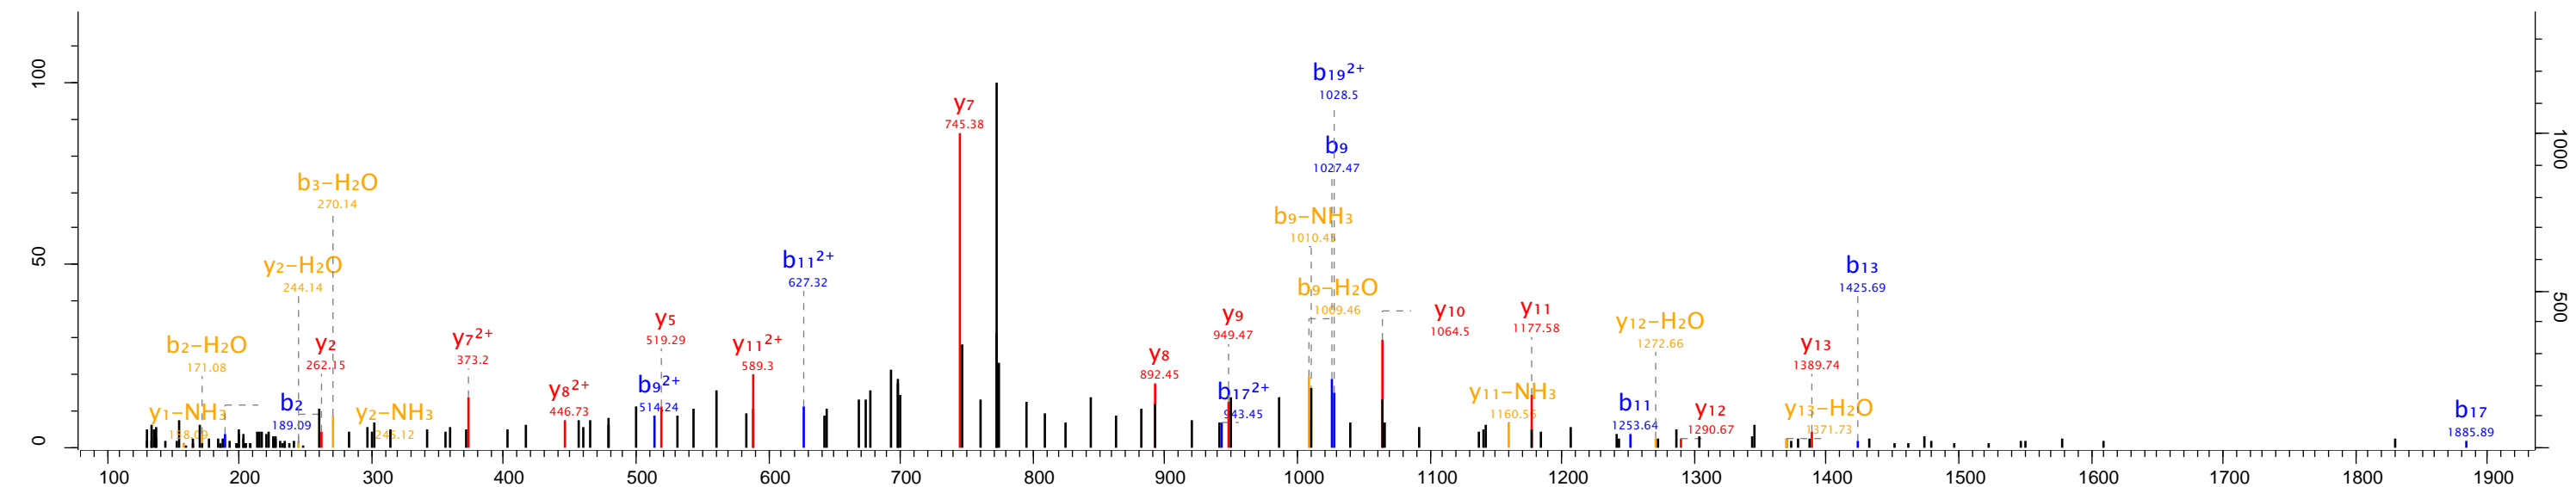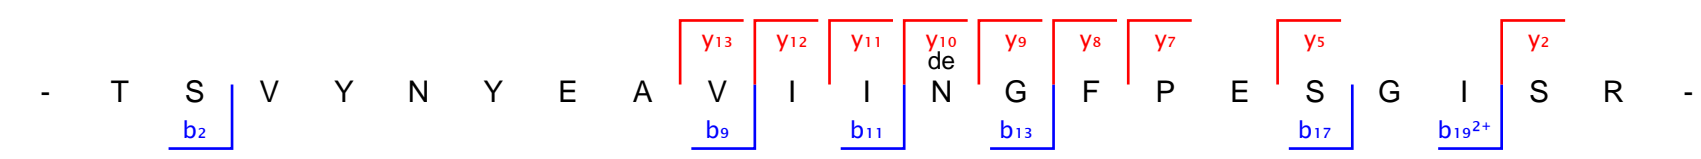

Spectral Annotation for Single-Peptide IDs between Single D11 Cells using Q-OT-LIT

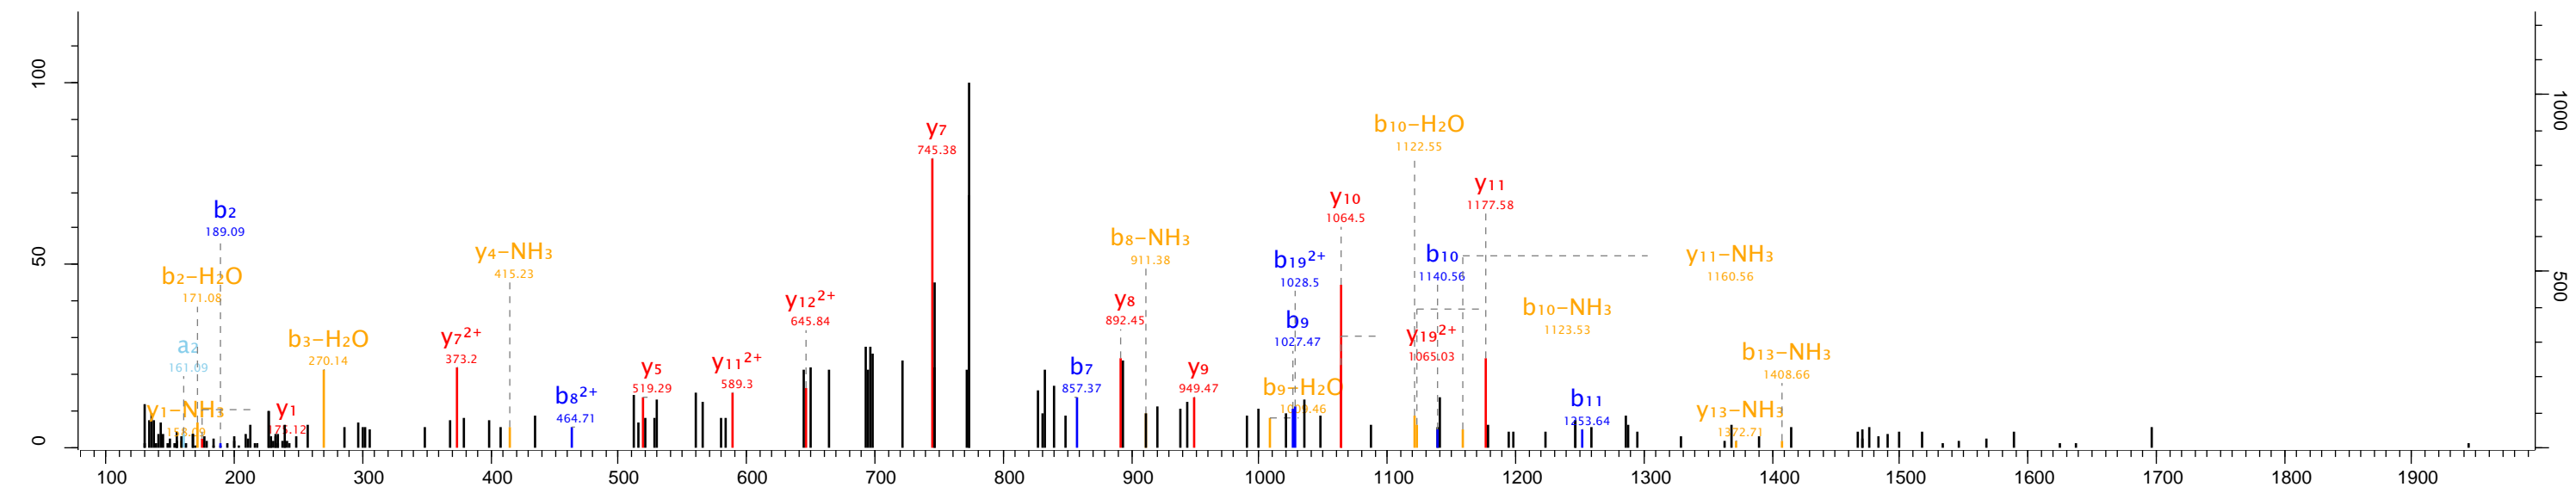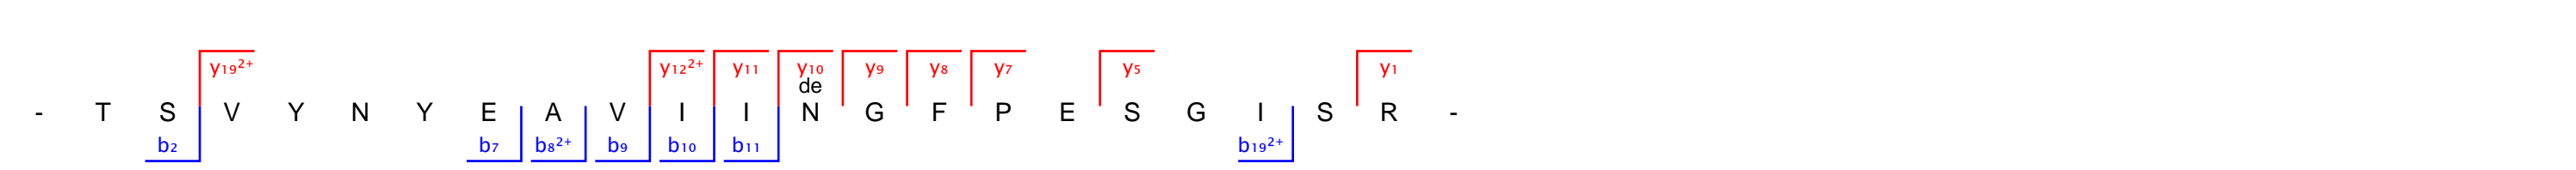

Raw file: 2015-01-08\_CL03\_Blastomere-15  
 Scan: 47994 Method: ITMS; HCD Score: 42.12 m/z: 773.05

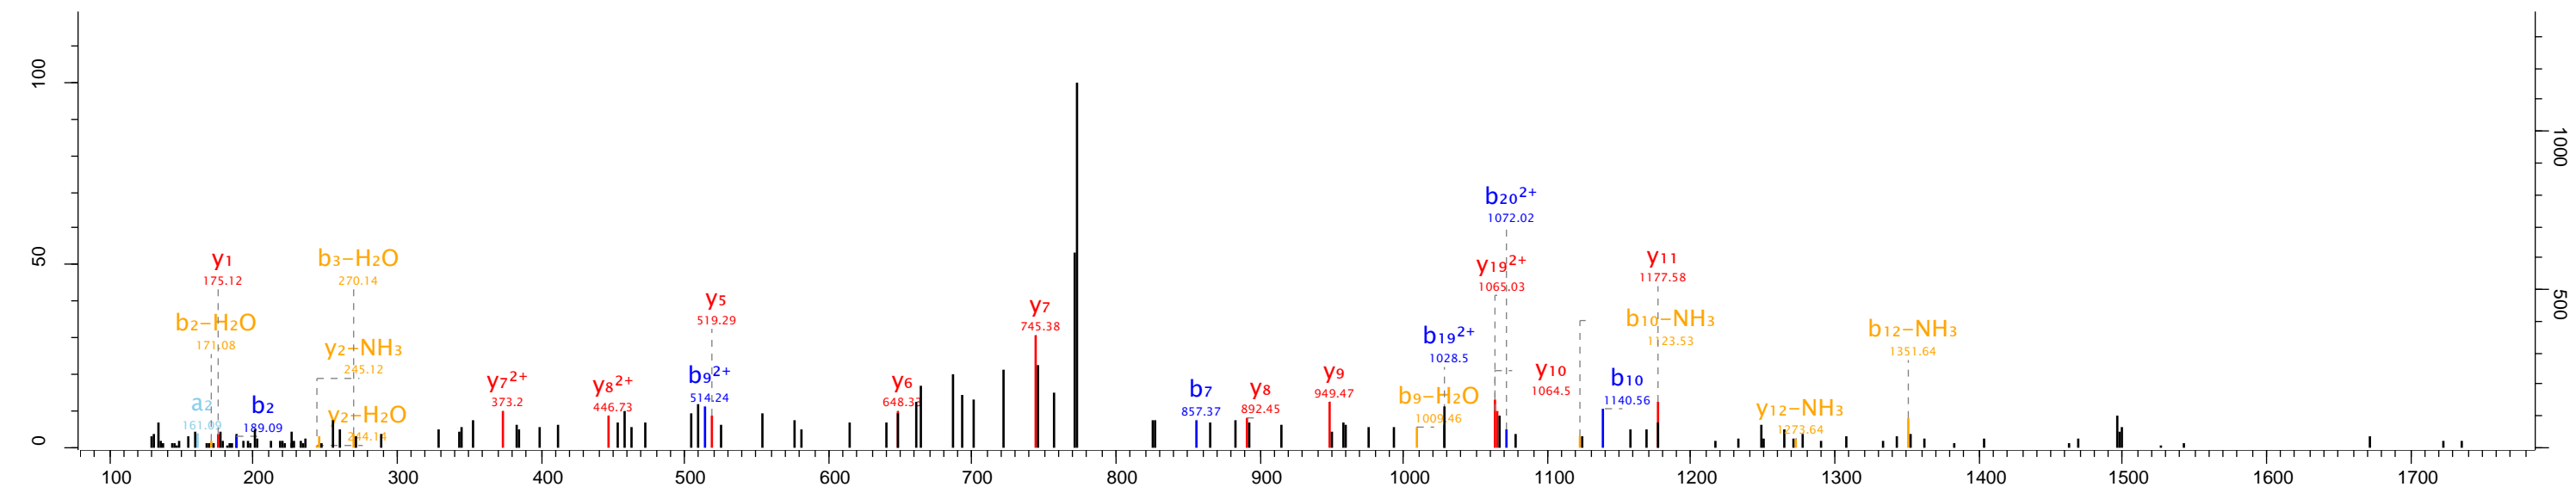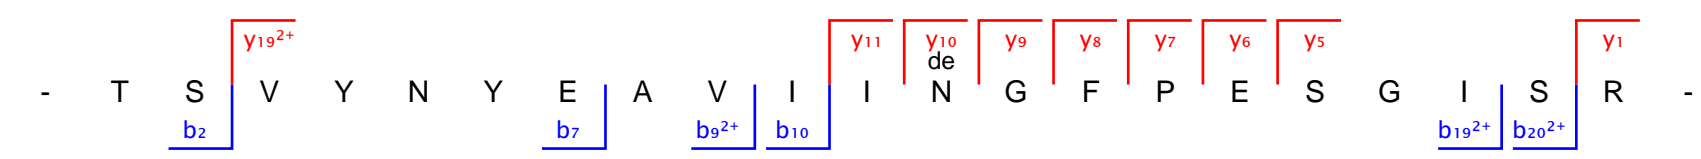

Raw file  
 2015-01-08\_CL03\_Blastomere-15  
 Scan 48036 Method ITMS; HCD Score 50.92 m/z 773.05

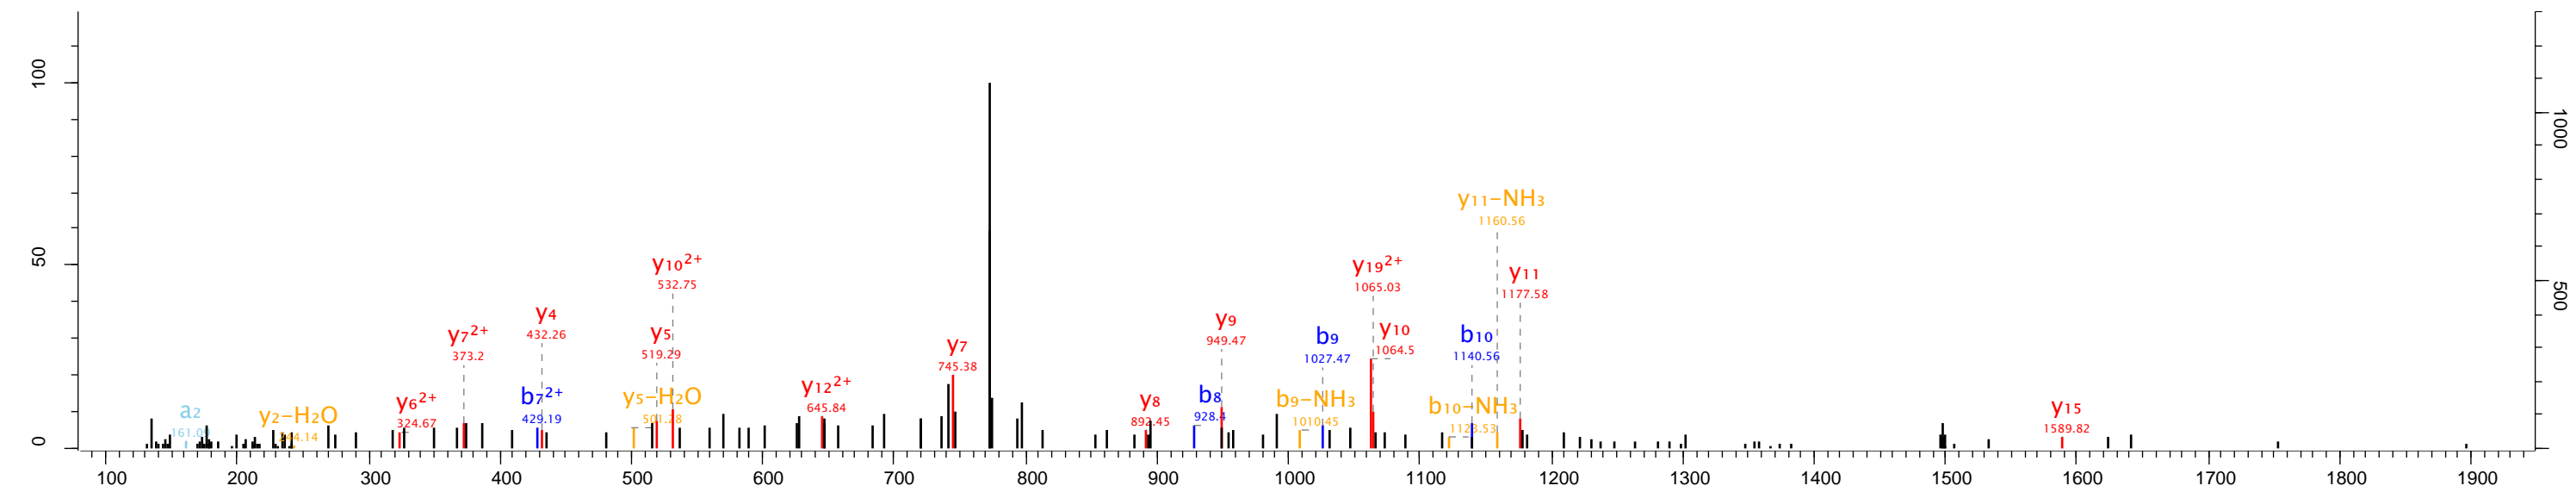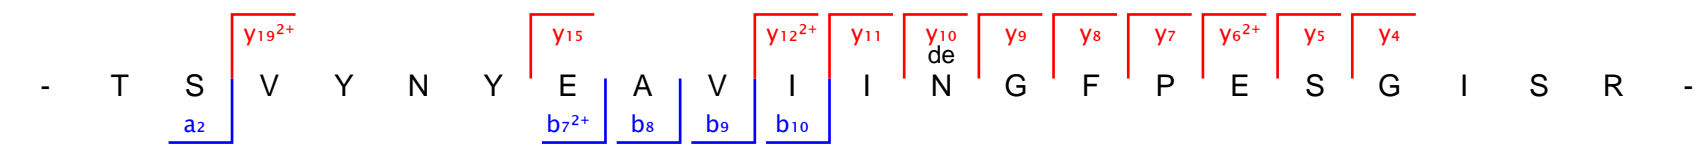



Raw file  
 2015-01-08\_CL03\_Blastomere-15  
 Scan 48136 Method ITMS; HCD Score 41.69 m/z 773.38

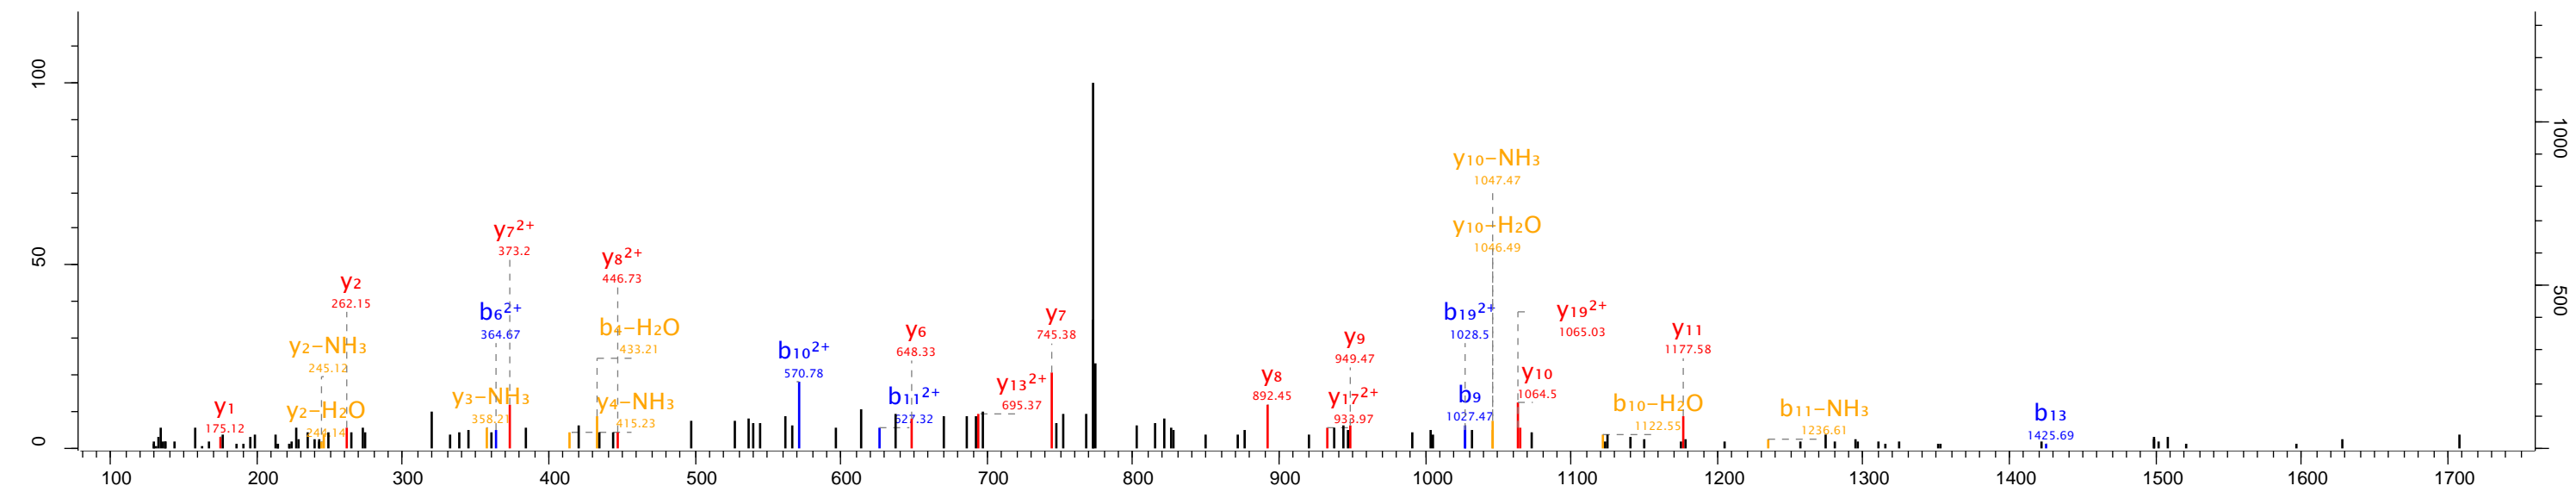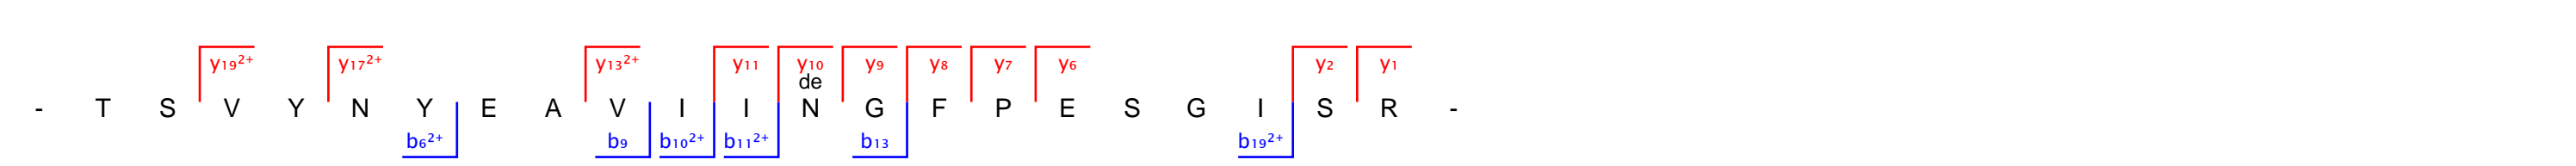

Spectral Annotation for Single-Peptide IDs between Single D11 Cells using Q-OT-LIT

Raw file 2015-01-08\_CL03\_Blastomere-15 Scan 48634 Method ITMS; HCD Score 53.48 m/z 854.08

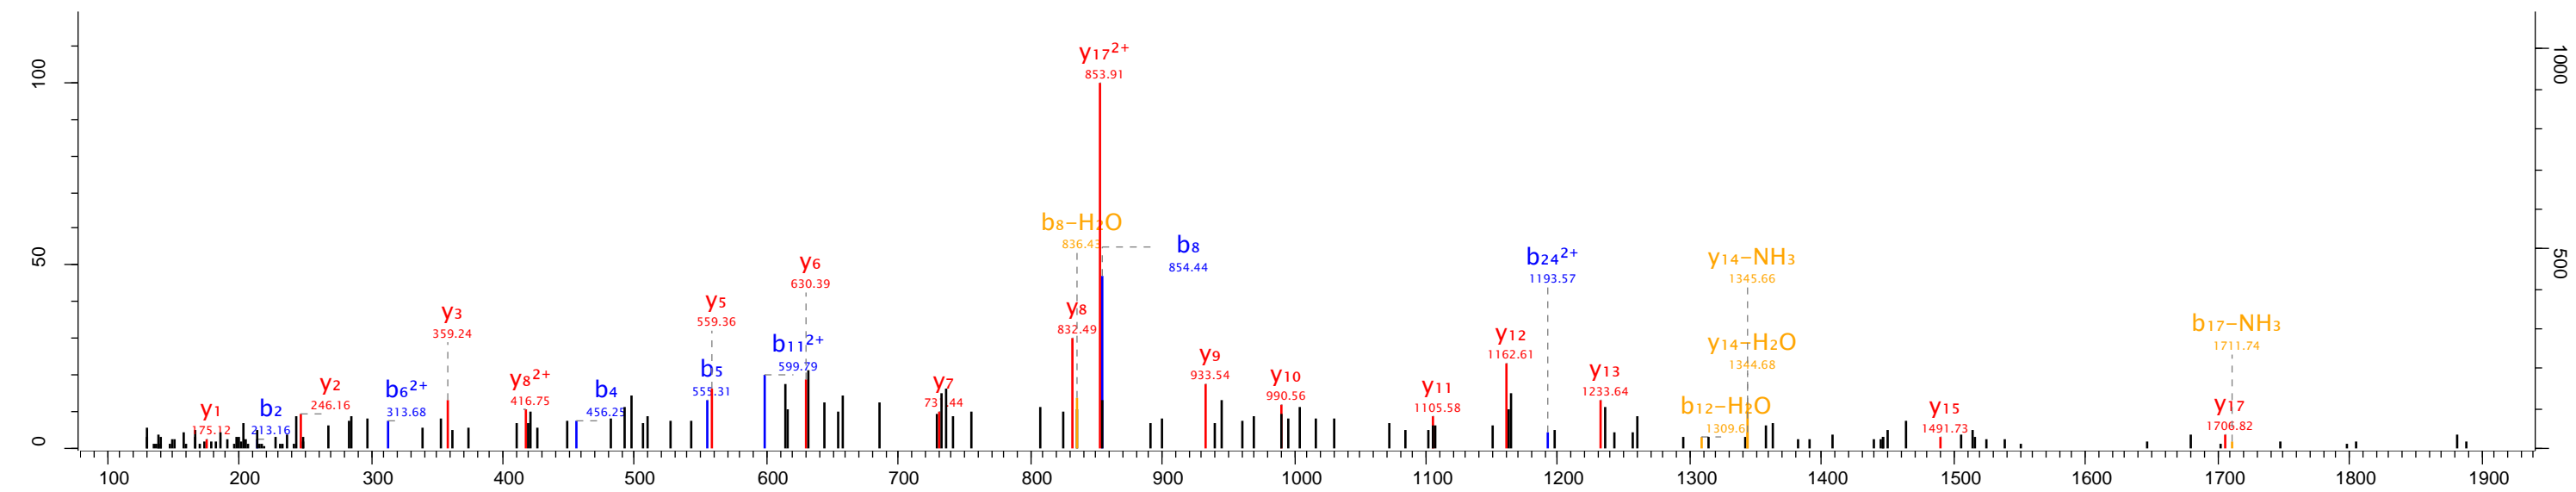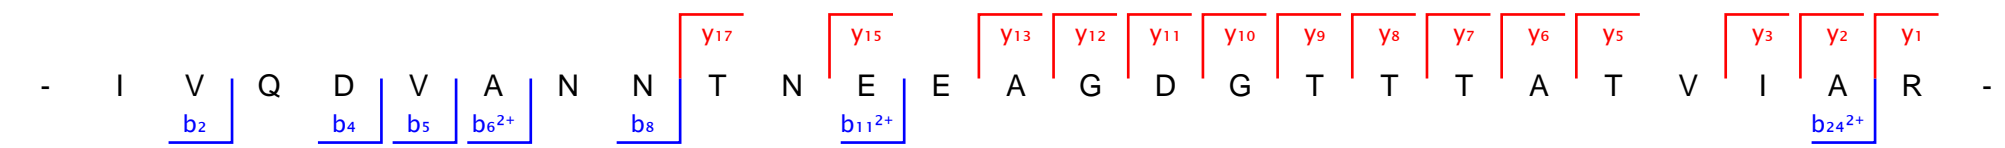

Spectral Annotation for Single-Peptide IDs between Single D11 Cells using Q-OT-LIT

Raw file 2015-01-08\_CL03\_Blastomere-15 Scan 48643 Method ITMS; HCD Score 64.27 m/z 854.75

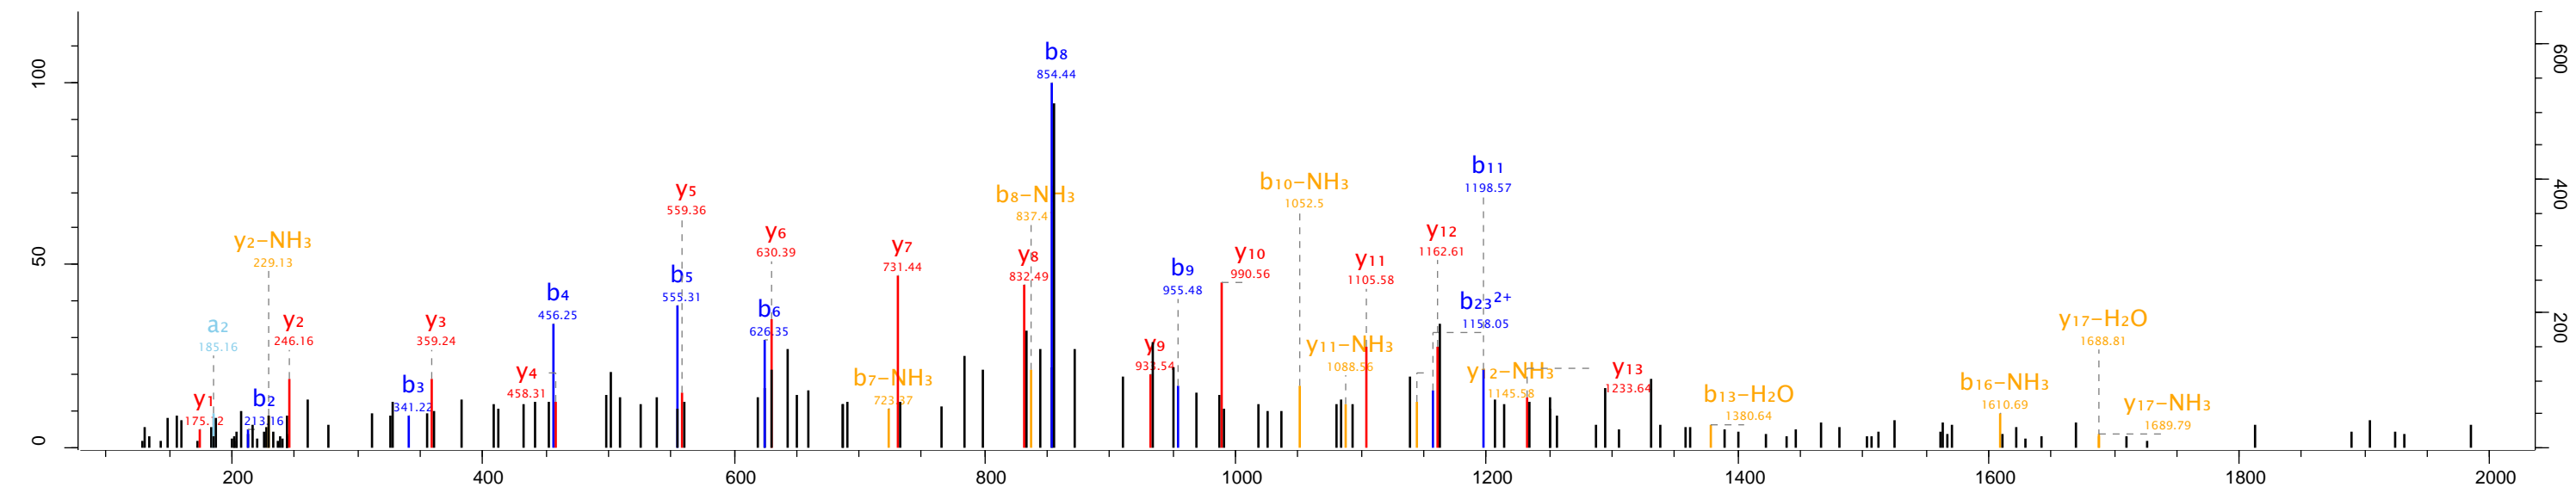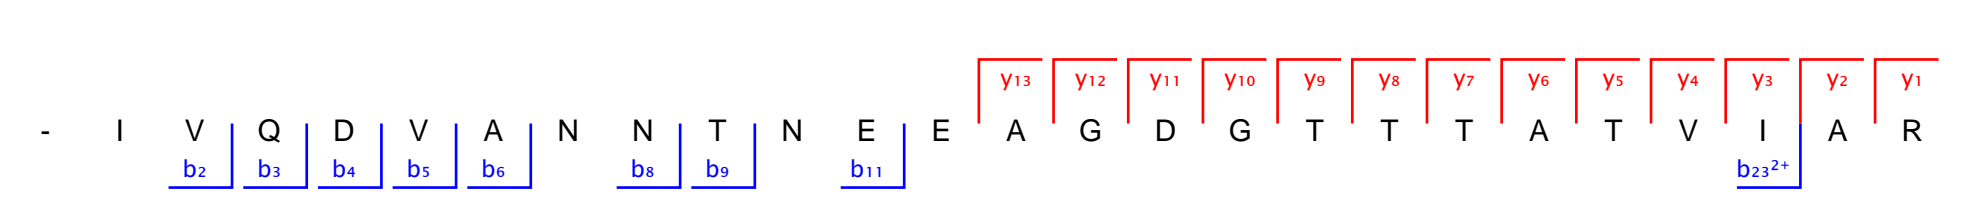

Spectral Annotation for Single-Peptide IDs between Single D11 Cells using Q-OT-LIT

Raw file 2015-01-08\_CL03\_Blastomere-15 Scan 48677 Method ITMS; HCD Score 71.42 m/z 854.42

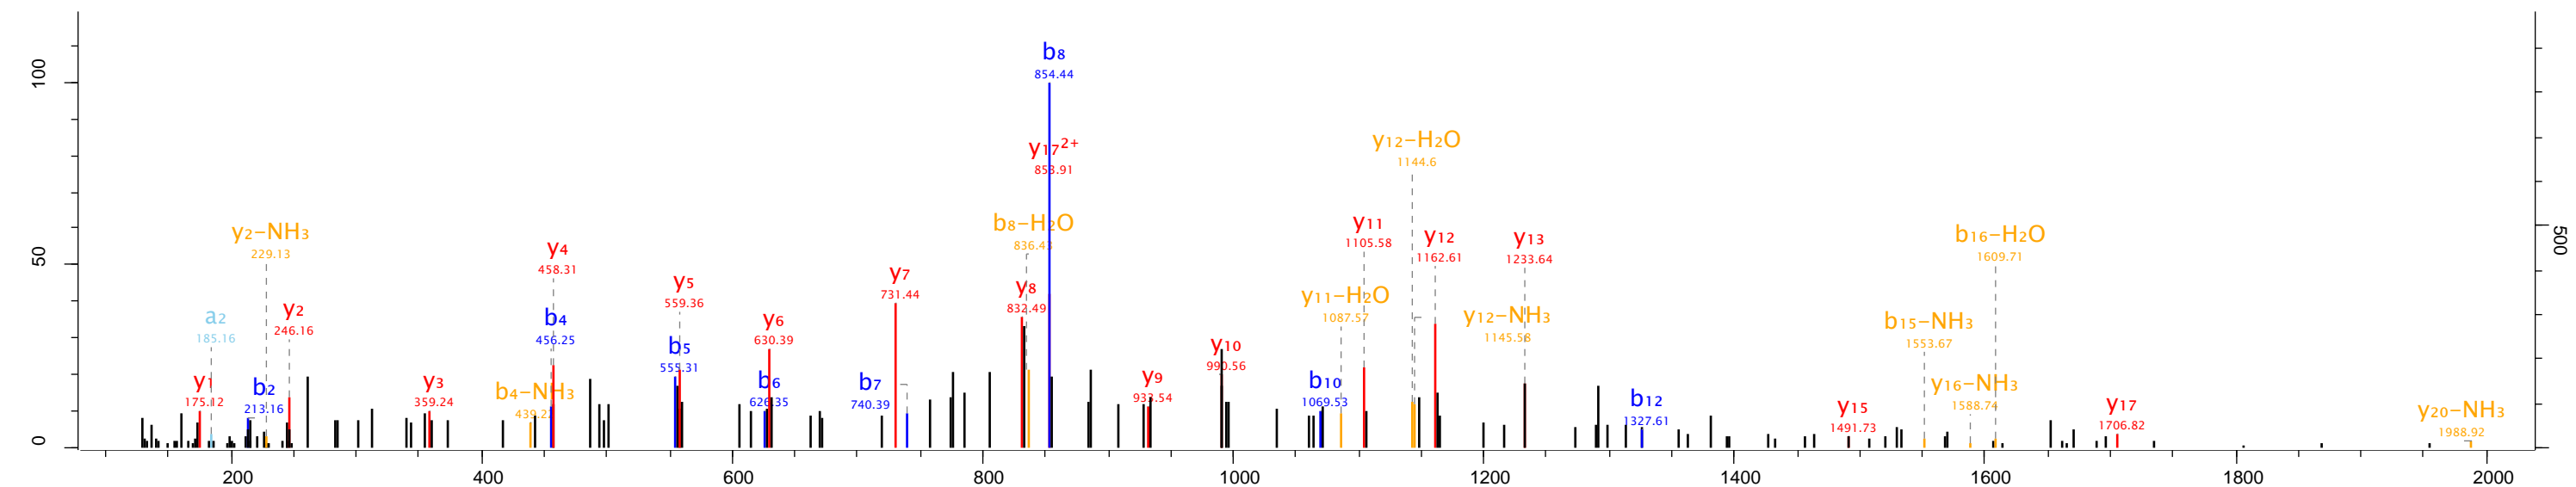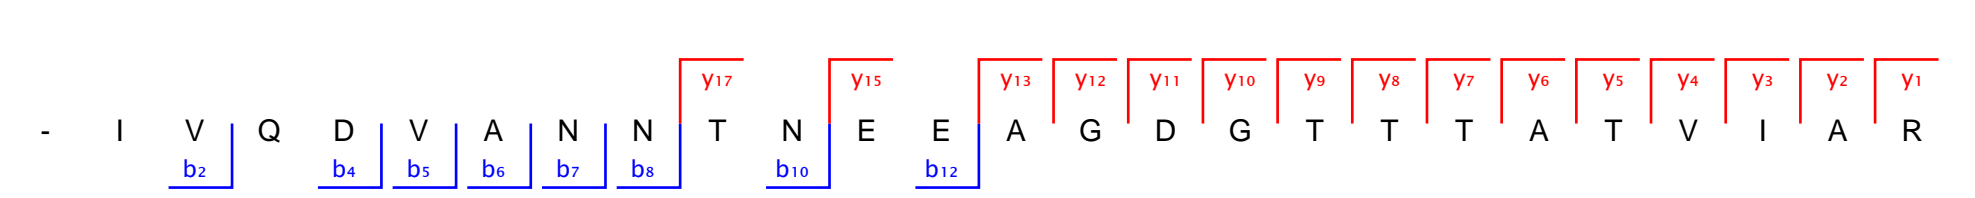

Spectral Annotation for Single-Peptide IDs between Single D11 Cells using Q-OT-LIT

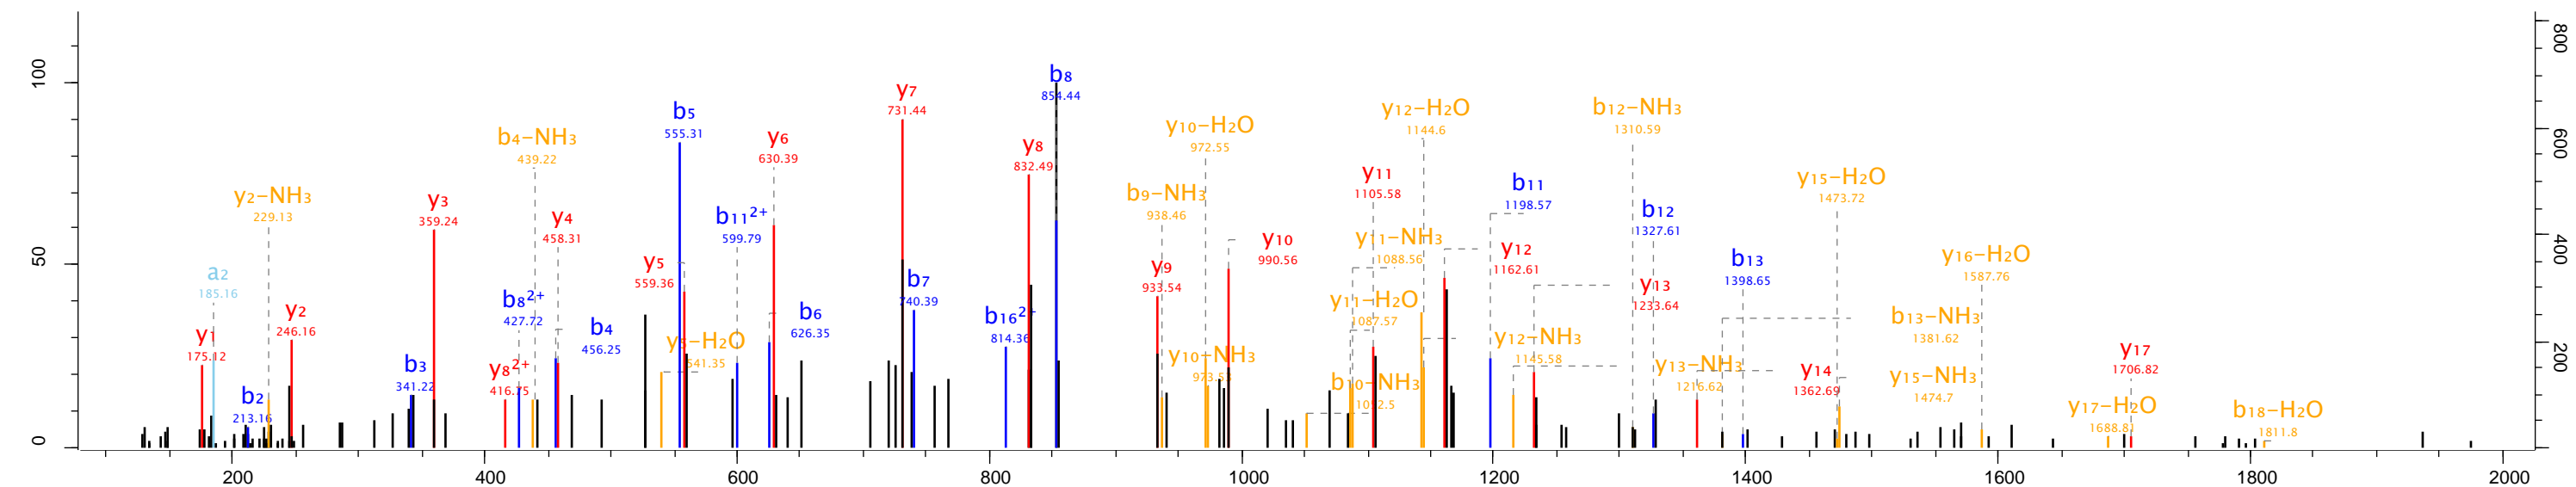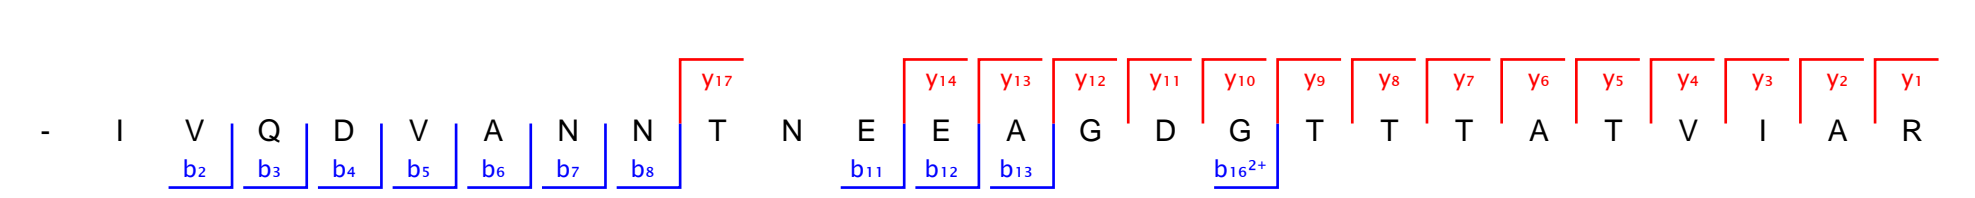

Raw file 2015-01-08\_CL03\_Blastomere-15 Scan 48961 Method ITMS; HCD Score 101.92 m/z 854.42

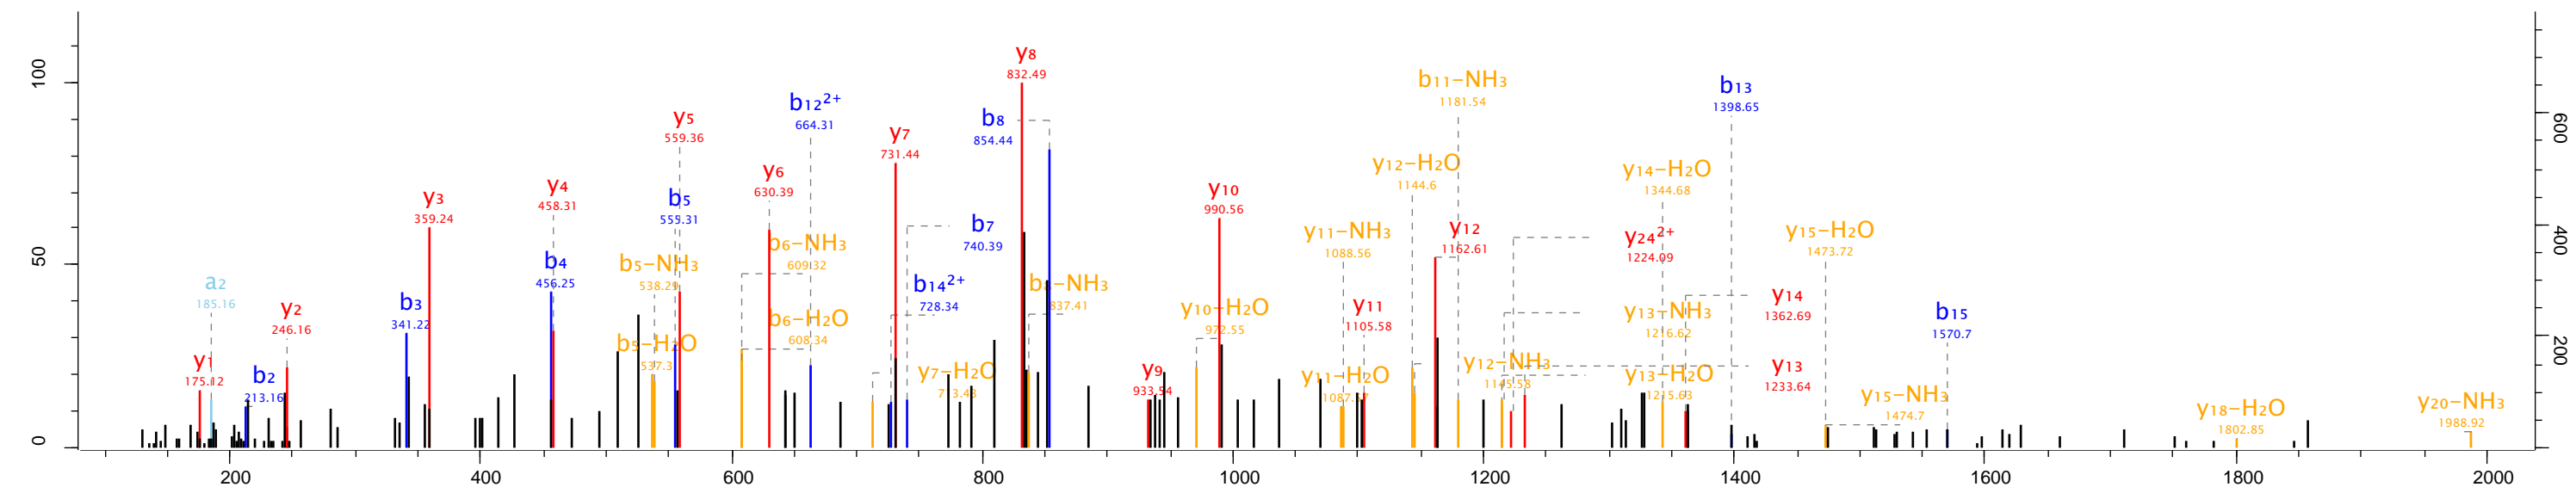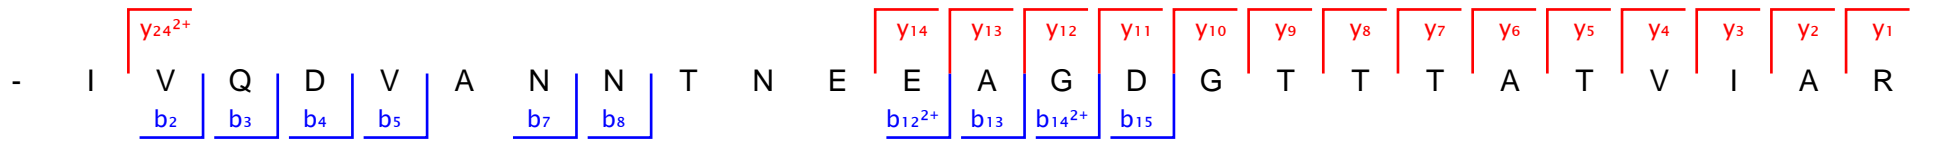

Spectral Annotation for Single-Peptide IDs between Single D11 Cells using Q-OT-LIT

Raw file 2015-01-08\_CL03\_Blastomere-15 Scan 49231 Method ITMS; HCD Score 95.21 m/z 854.42

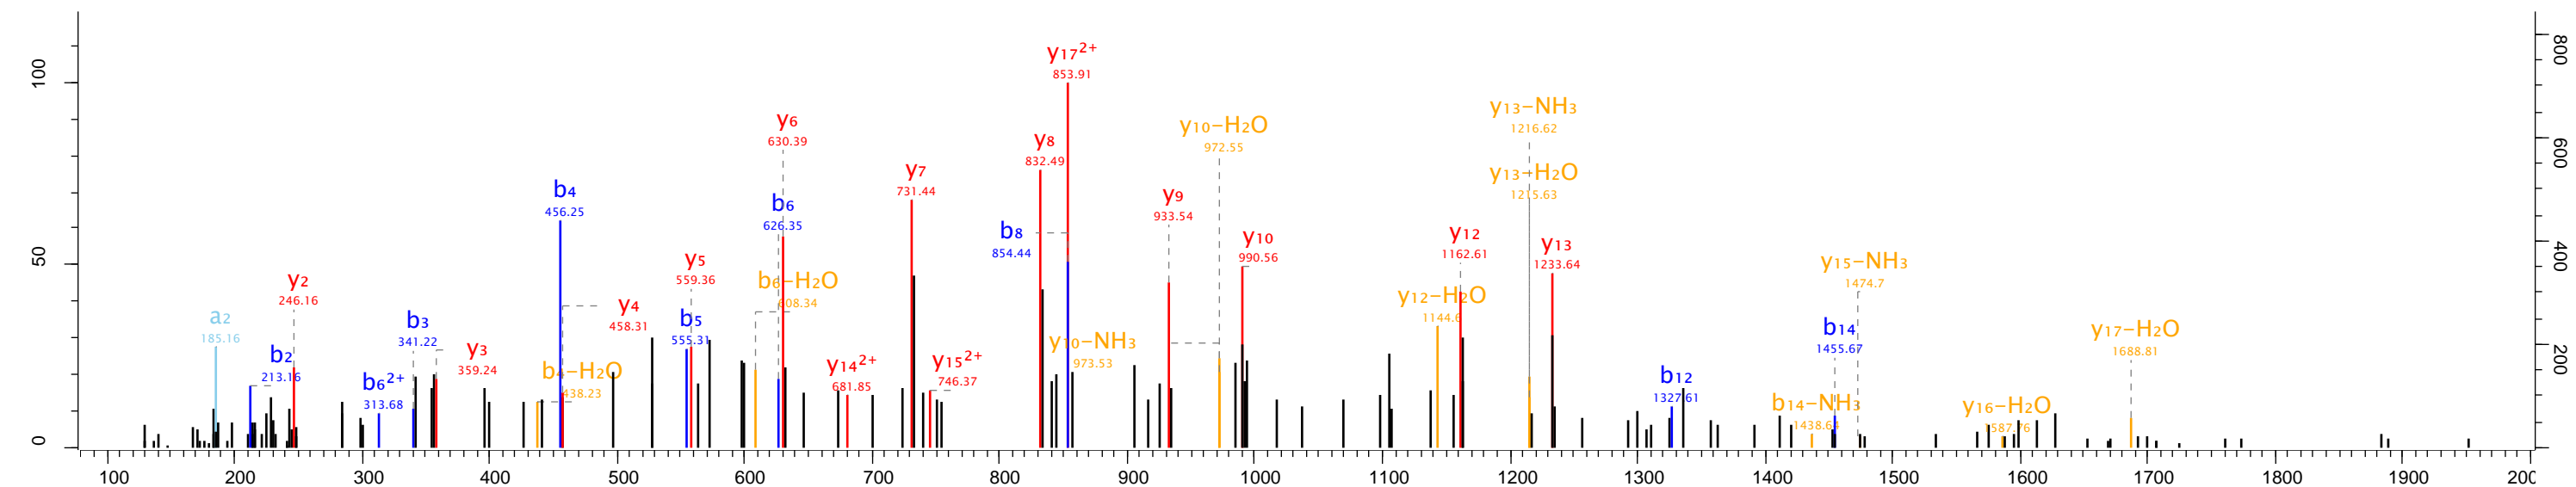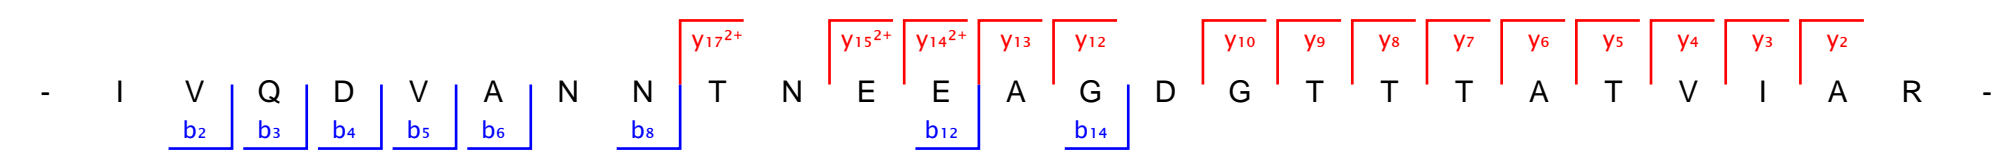

Raw file 2015-01-08\_CL03\_Blastomere-15 Scan 49441 Method ITMS; HCD Score 29.23 m/z 854.42

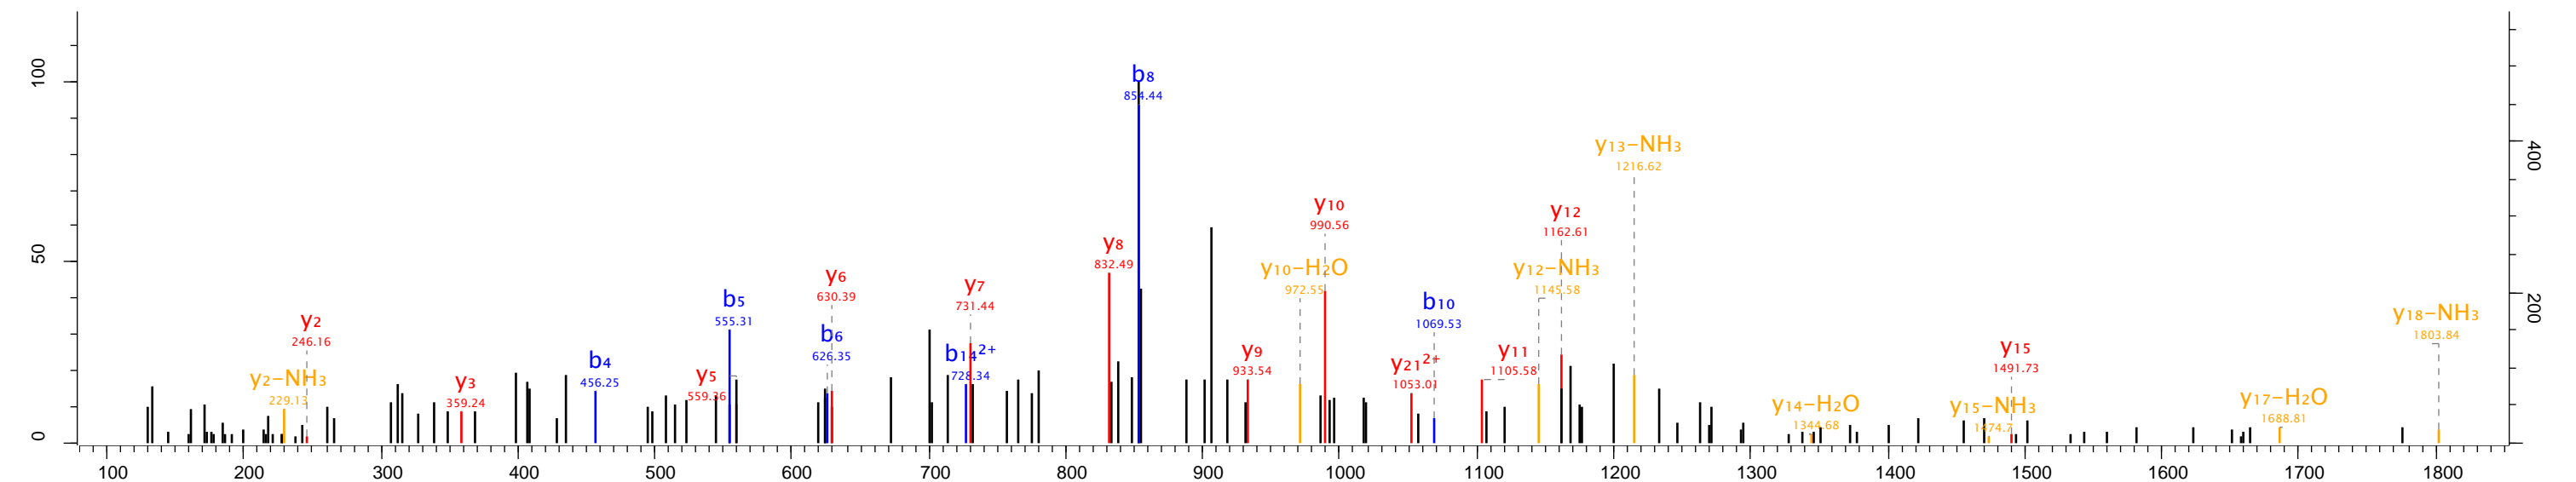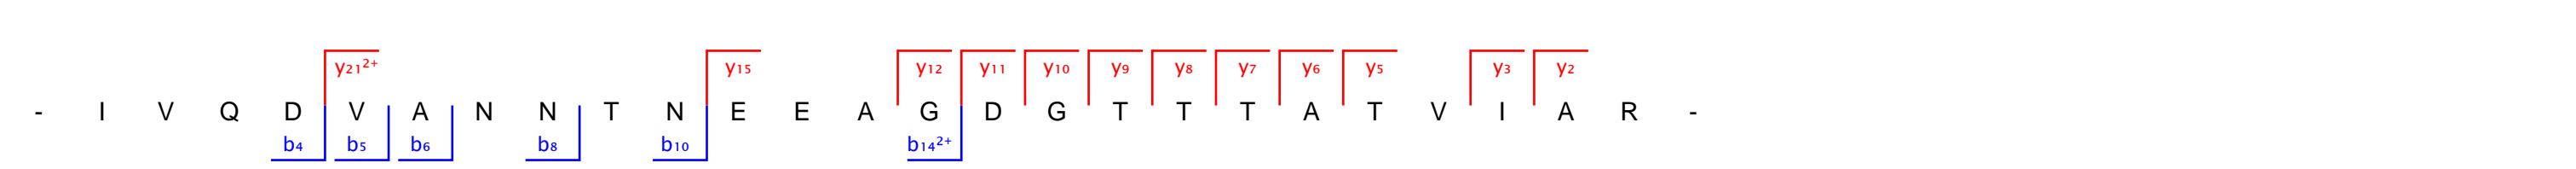

Spectral Annotation for Single-Peptide IDs between Single D11 Cells using Q-OT-LIT



Raw file 2015-01-08\_CL03\_Blastomere-15 Scan 49450 Method ITMS; HCD Score 36.63 m/z 854.75

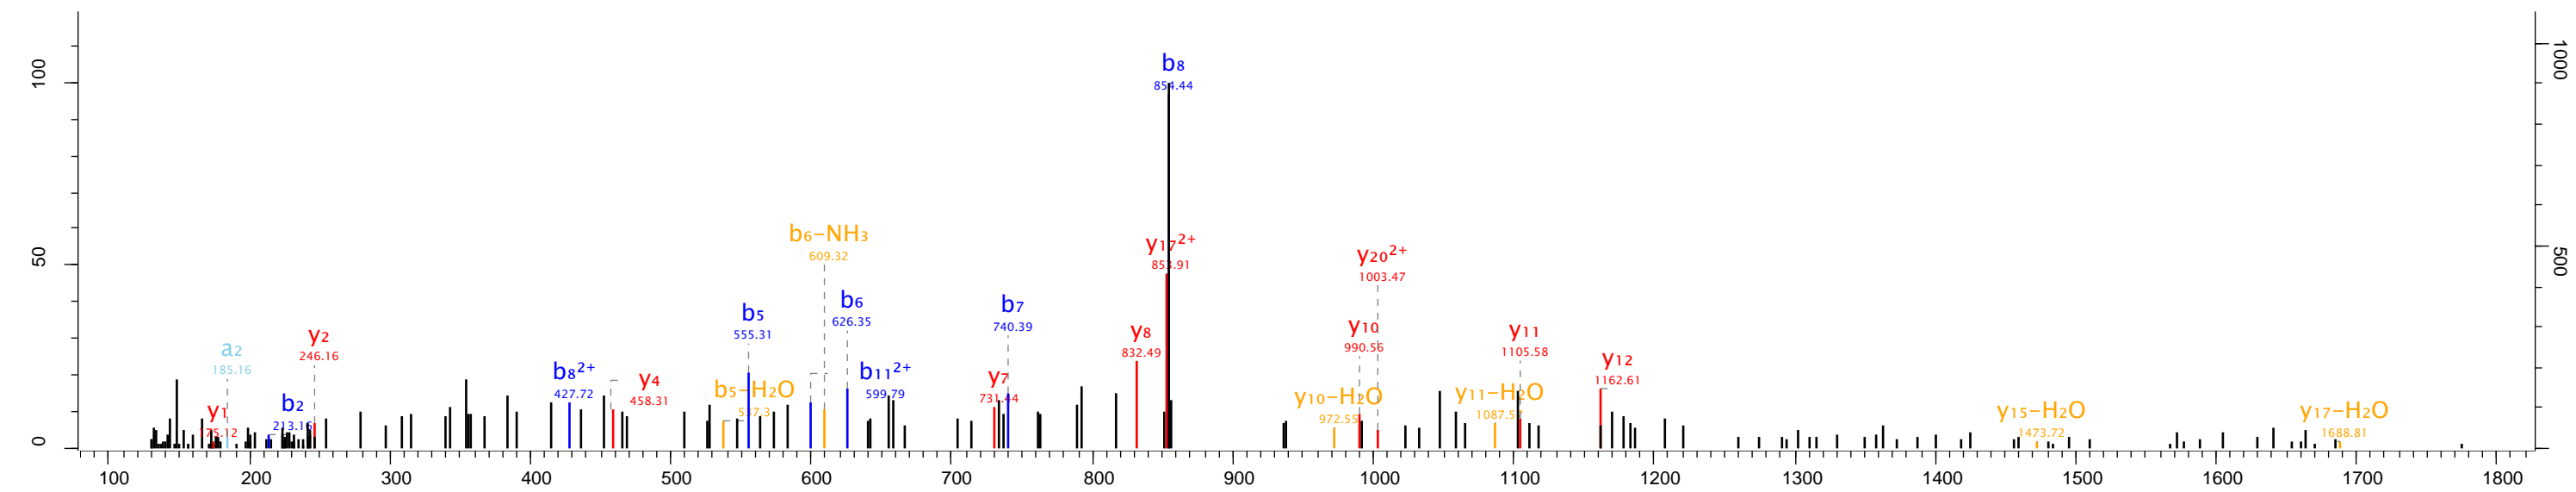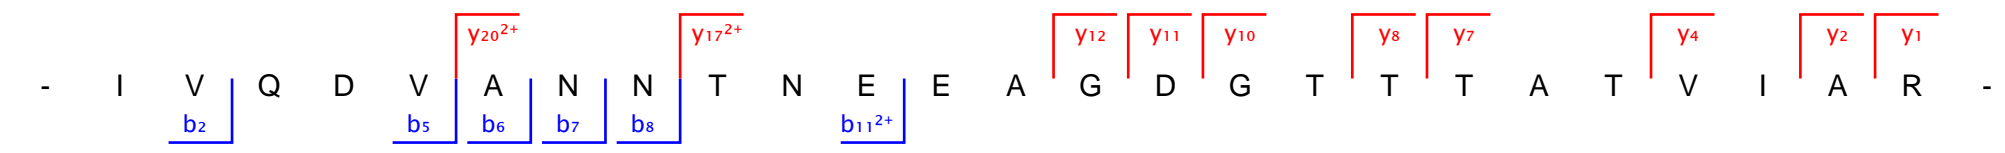

Spectral Annotation for Single-Peptide IDs between Single D11 Cells using Q-OT-LIT

Raw file 2015-01-08\_CL03\_Blastomere-15  
 Scan 49479 Method ITMS; HCD Score 34.04 m/z 854.75

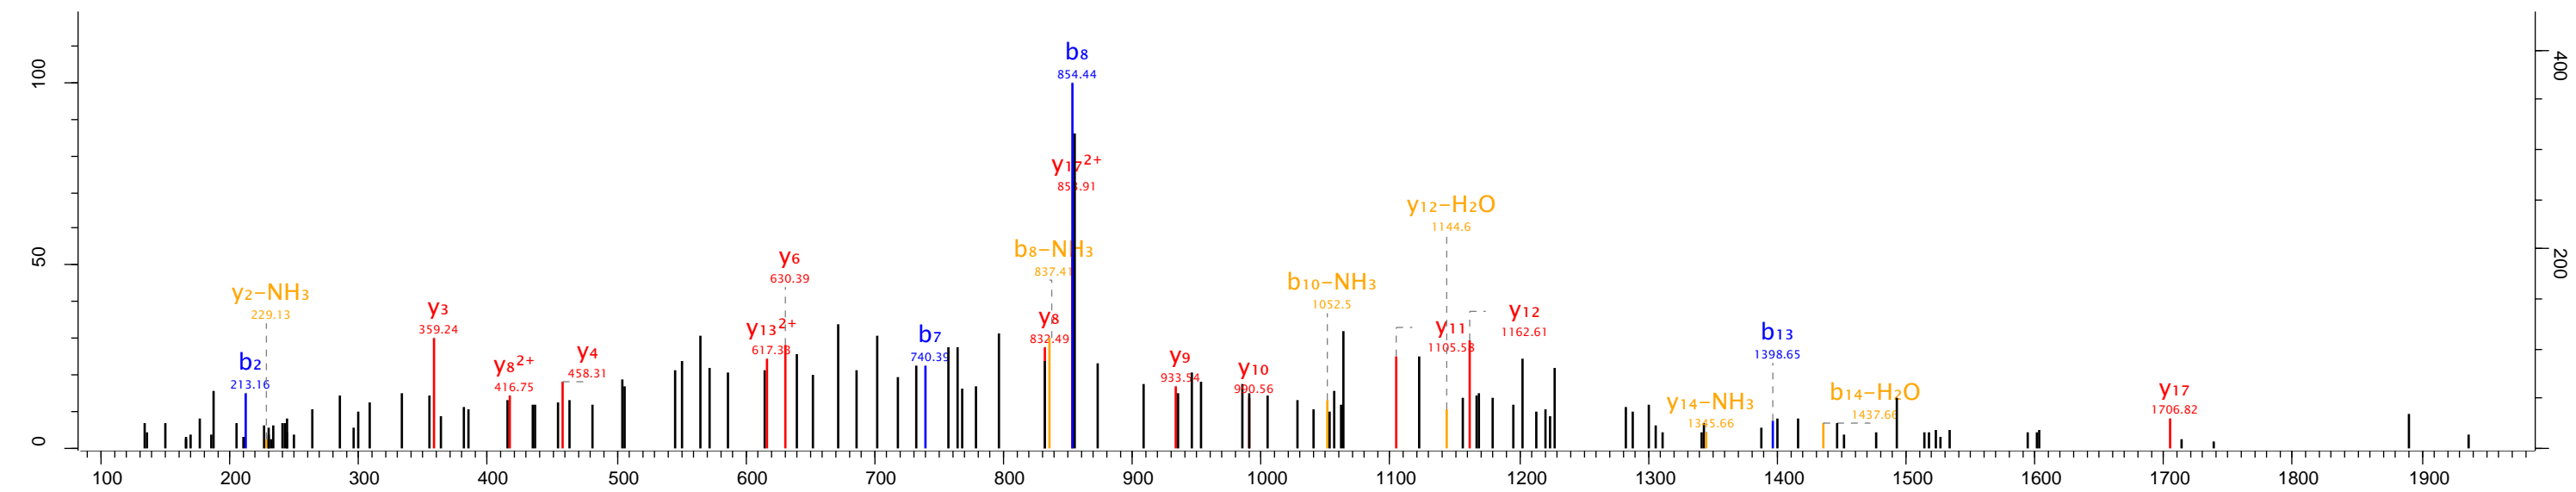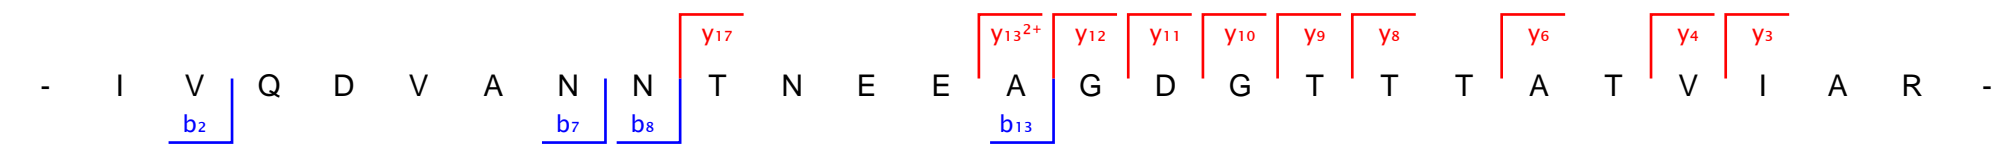

Spectral Annotation for Single-Peptide IDs between Single D11 Cells using Q-OT-LIT

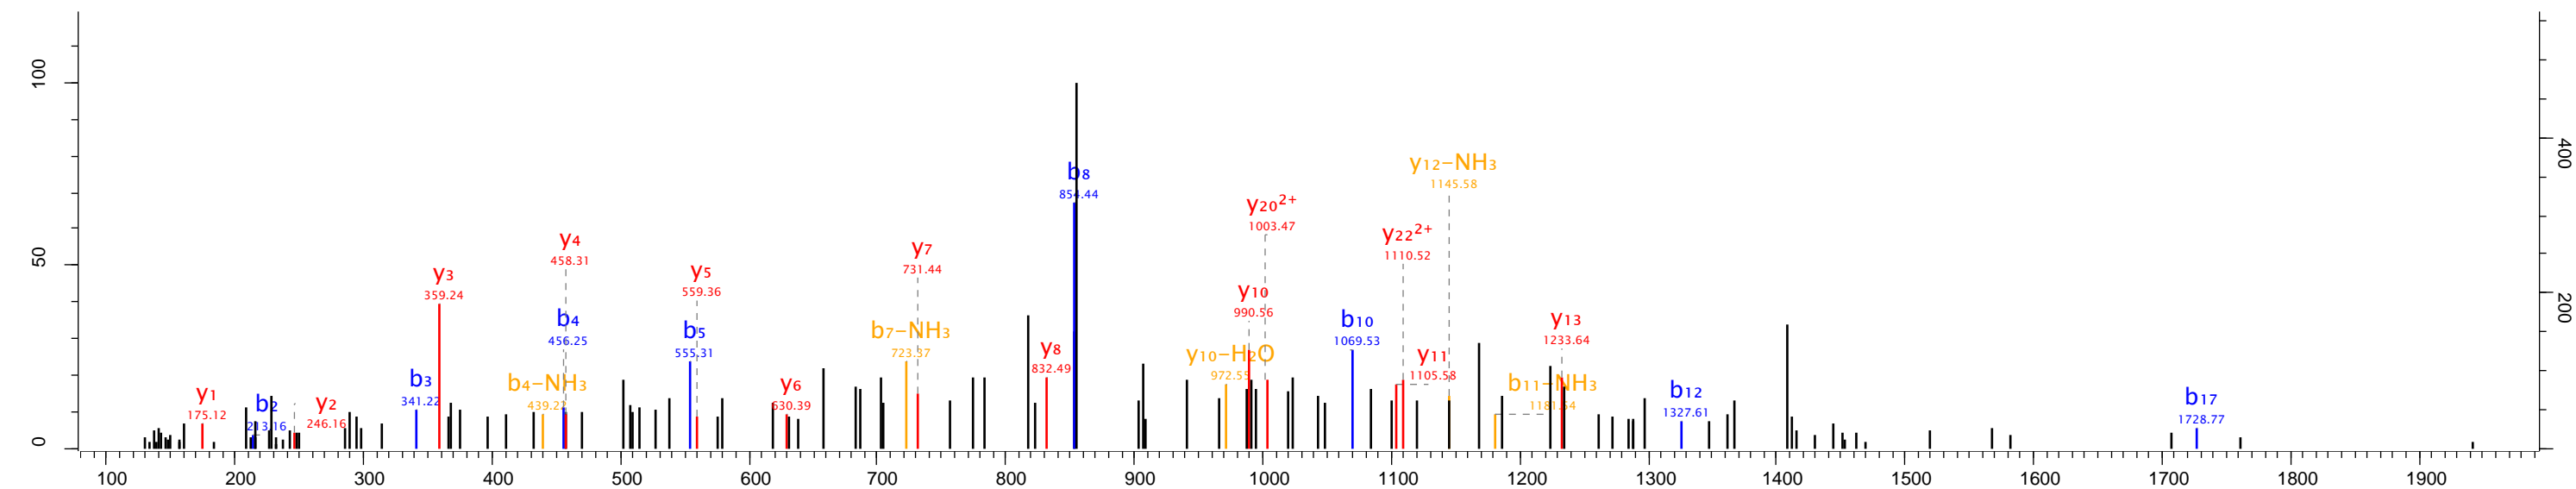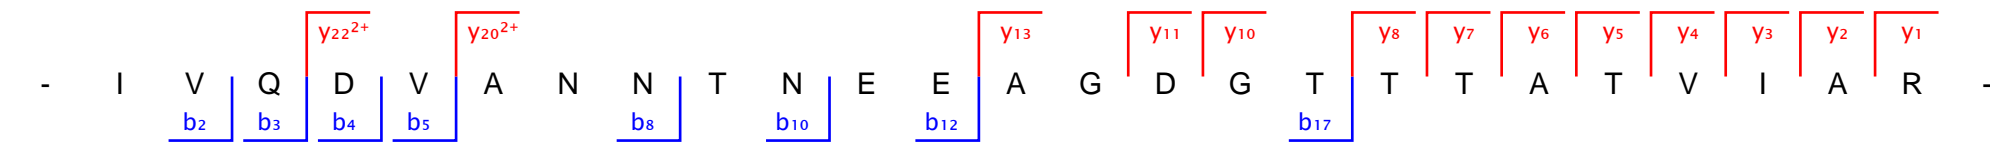

Raw file  
 2015-01-08\_CL03\_Blastomere-15  
 Scan 49973 Method ITMS; HCD Score 51.35 m/z 499.8

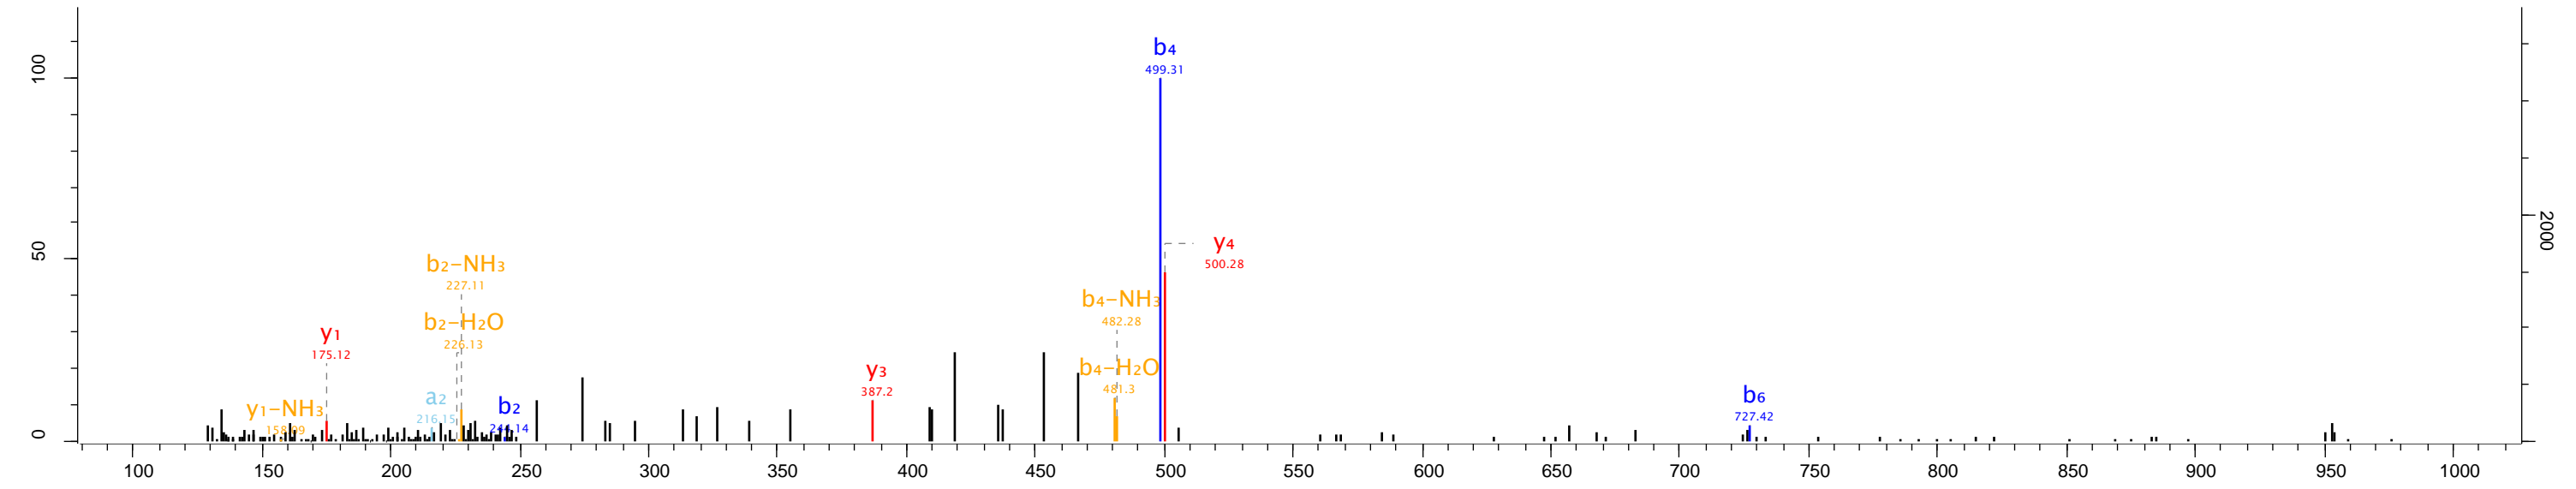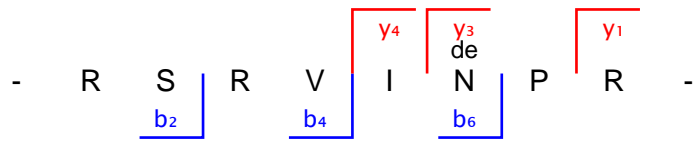

Raw file 2015-01-08\_CL04\_Blastomere-15 Scan 23633 Method ITMS; HCD Score 60.16 m/z 396.46

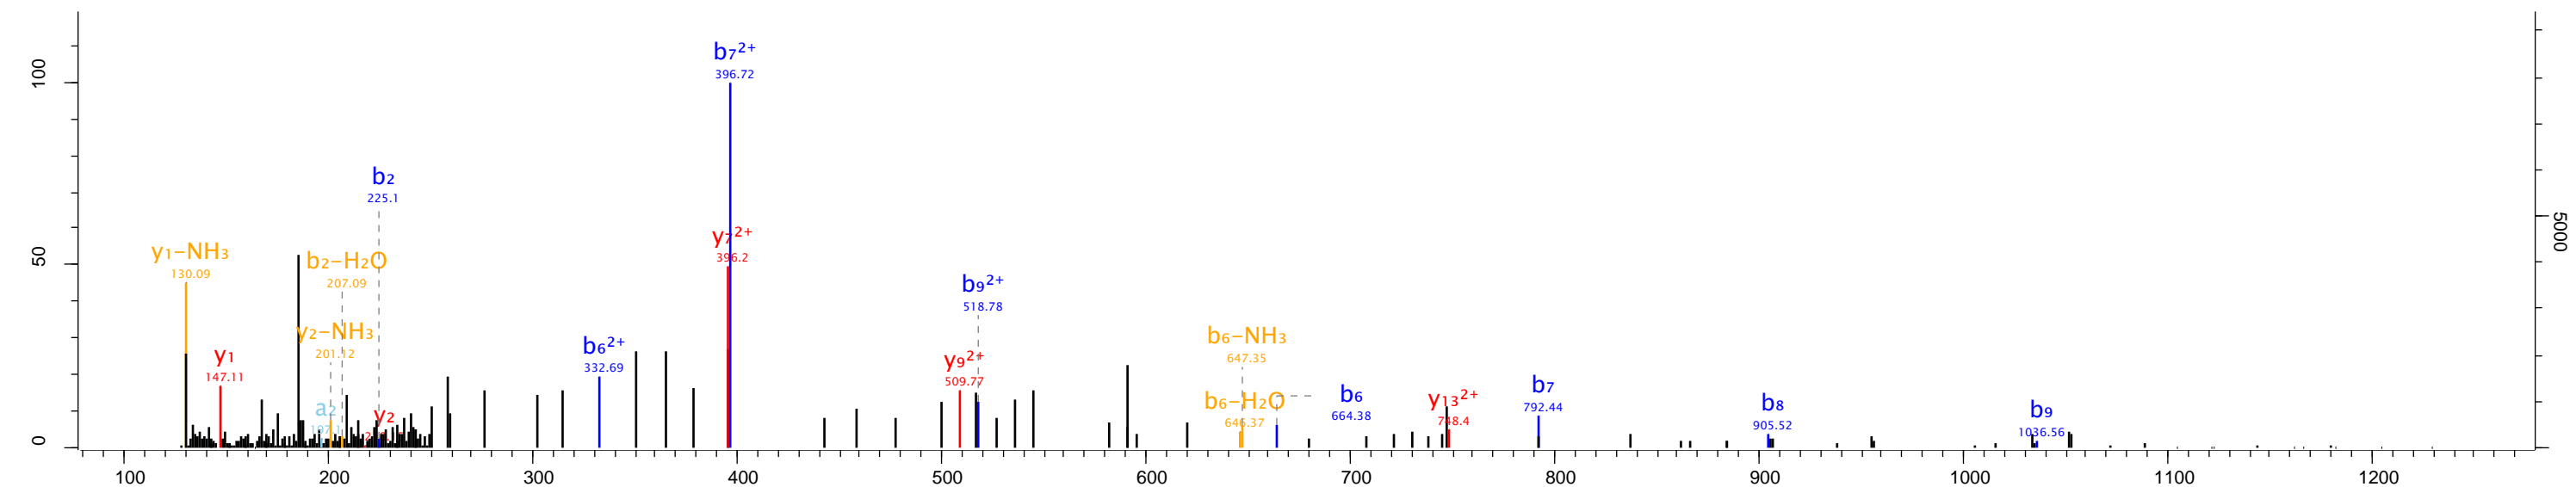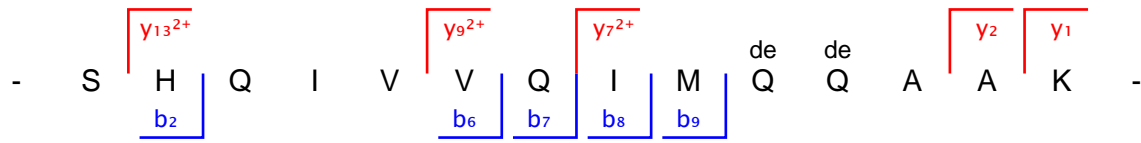

Spectral Annotation for Single-Peptide IDs between Single D11 Cells using Q-OT-LIT

Raw file 2015-01-08\_CL04\_Blastomere-15 Scan 23662 Method ITMS; HCD Score 55.9 m/z 396.46

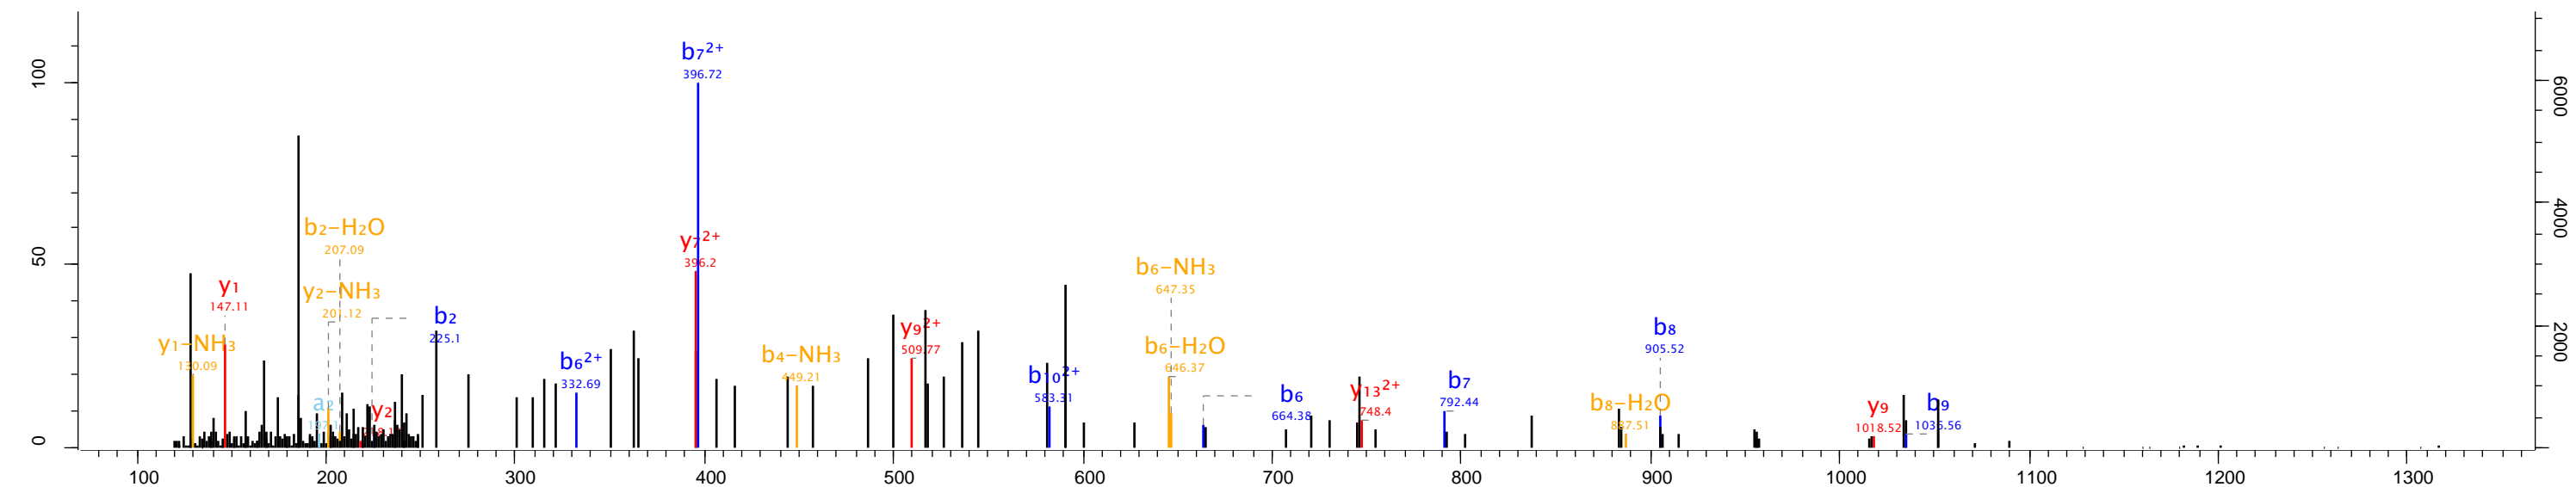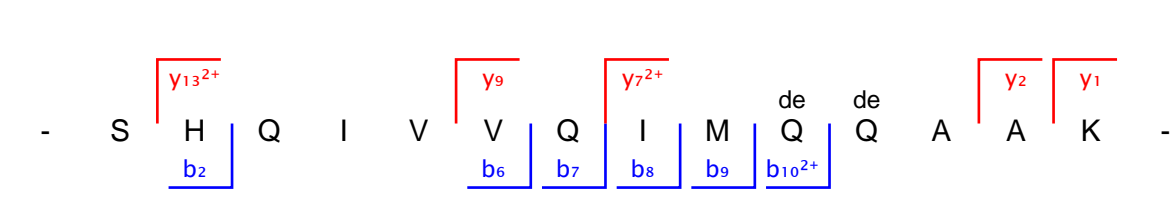

Spectral Annotation for Single-Peptide IDs between Single D11 Cells using Q-OT-LIT

Raw file  
 2015-01-08\_CL04\_Blastomere-15  
 Scan 23696 Method ITMS; HCD Score 69.29 m/z 586.82

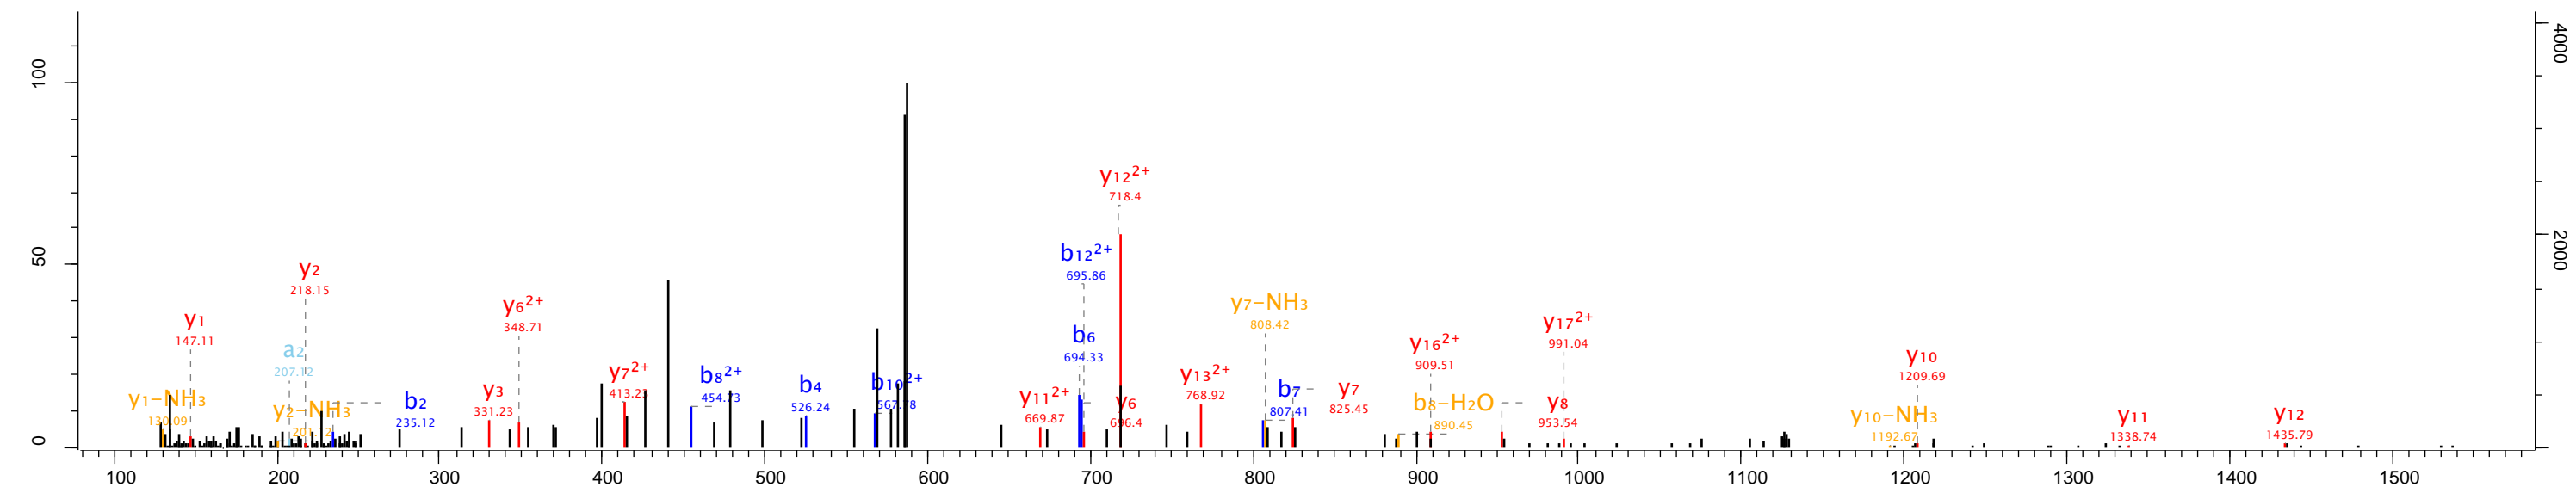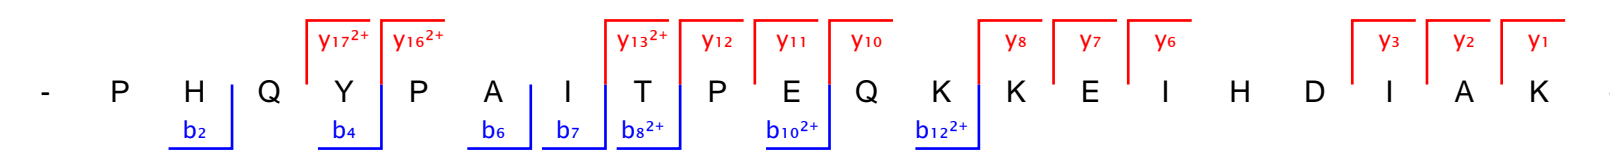

Spectral Annotation for Single-Peptide IDs between Single D11 Cells using Q-OT-LIT

Raw file 2015-01-08\_CL04\_Blastomere-15 Scan 23704 Method ITMS; HCD Score 39.92 m/z 586.57

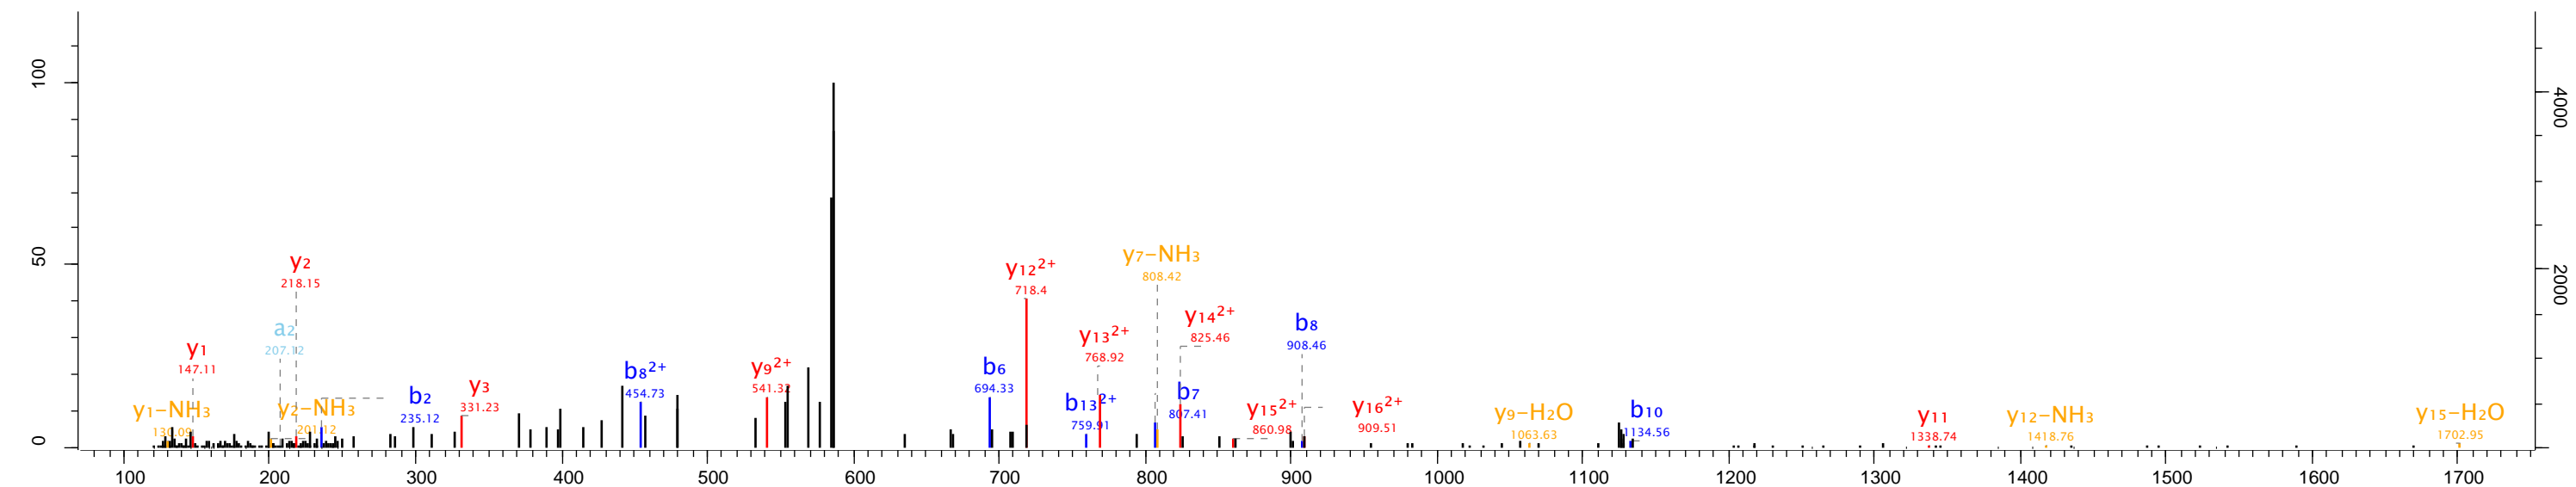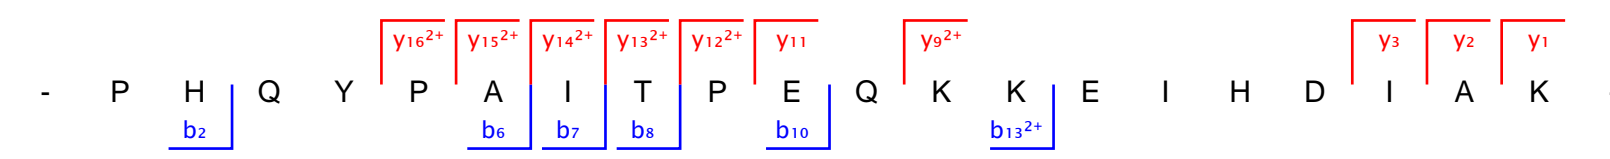

Spectral Annotation for Single-Peptide IDs between Single D11 Cells using Q-OT-LIT



Raw file 2015-01-08\_CL04\_Blastomere-15 Scan 24422 Method ITMS; HCD Score 43.6 m/z 470.23

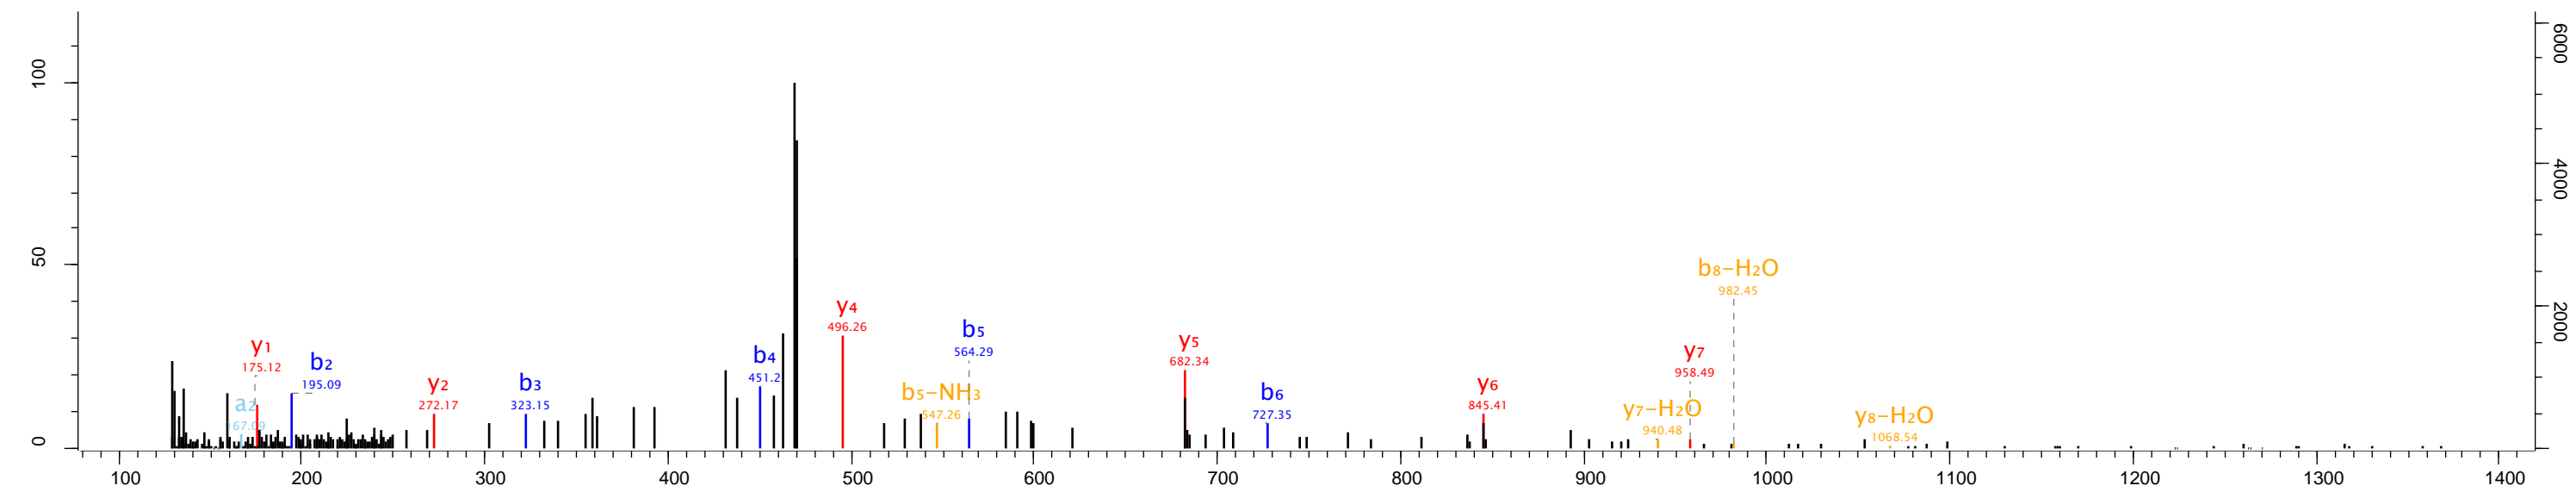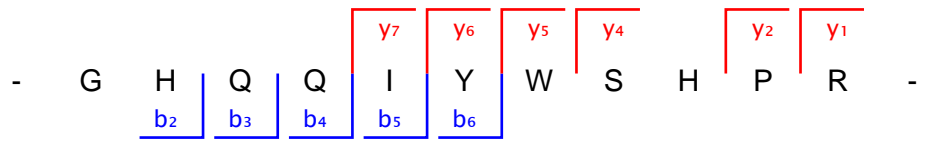

Raw file 2015-01-08\_CL04\_Blastomere-15 Scan 24587 Method ITMS; HCD Score 72.68 m/z 454.73

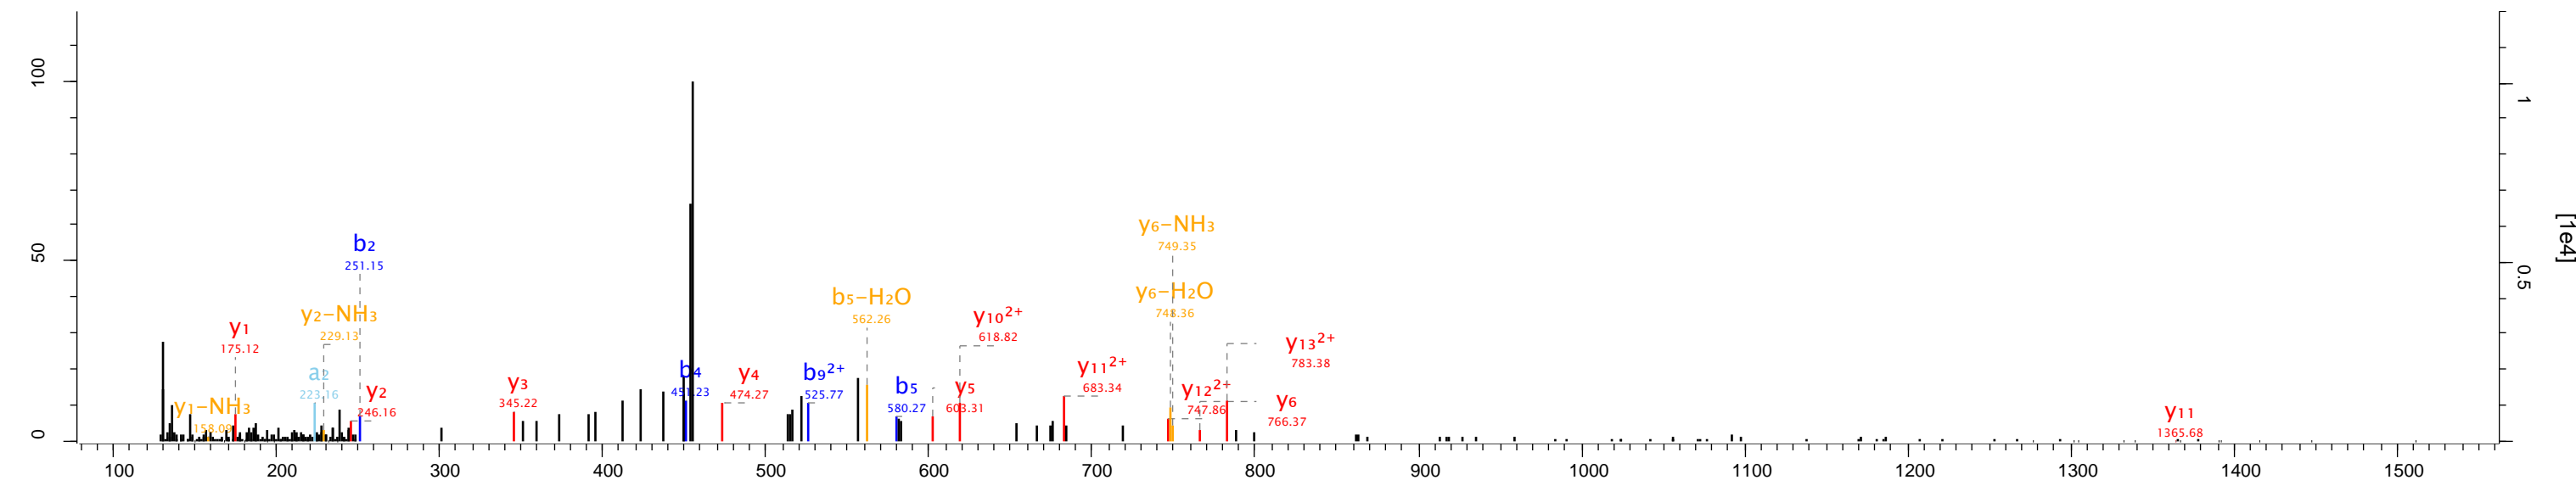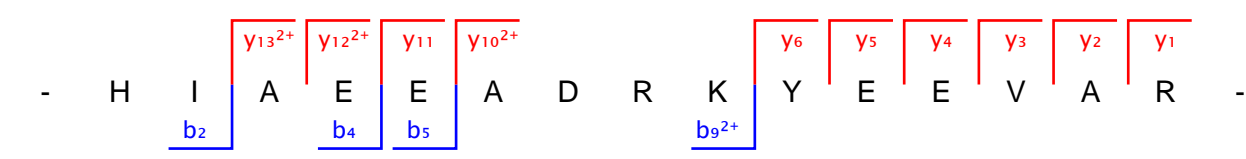

Spectral Annotation for Single-Peptide IDs between Single D11 Cells using Q-OT-LIT

Raw file 2015-01-08\_CL04\_Blastomere-15 Scan 24829 Method ITMS; HCD Score 53.98 m/z 498.51

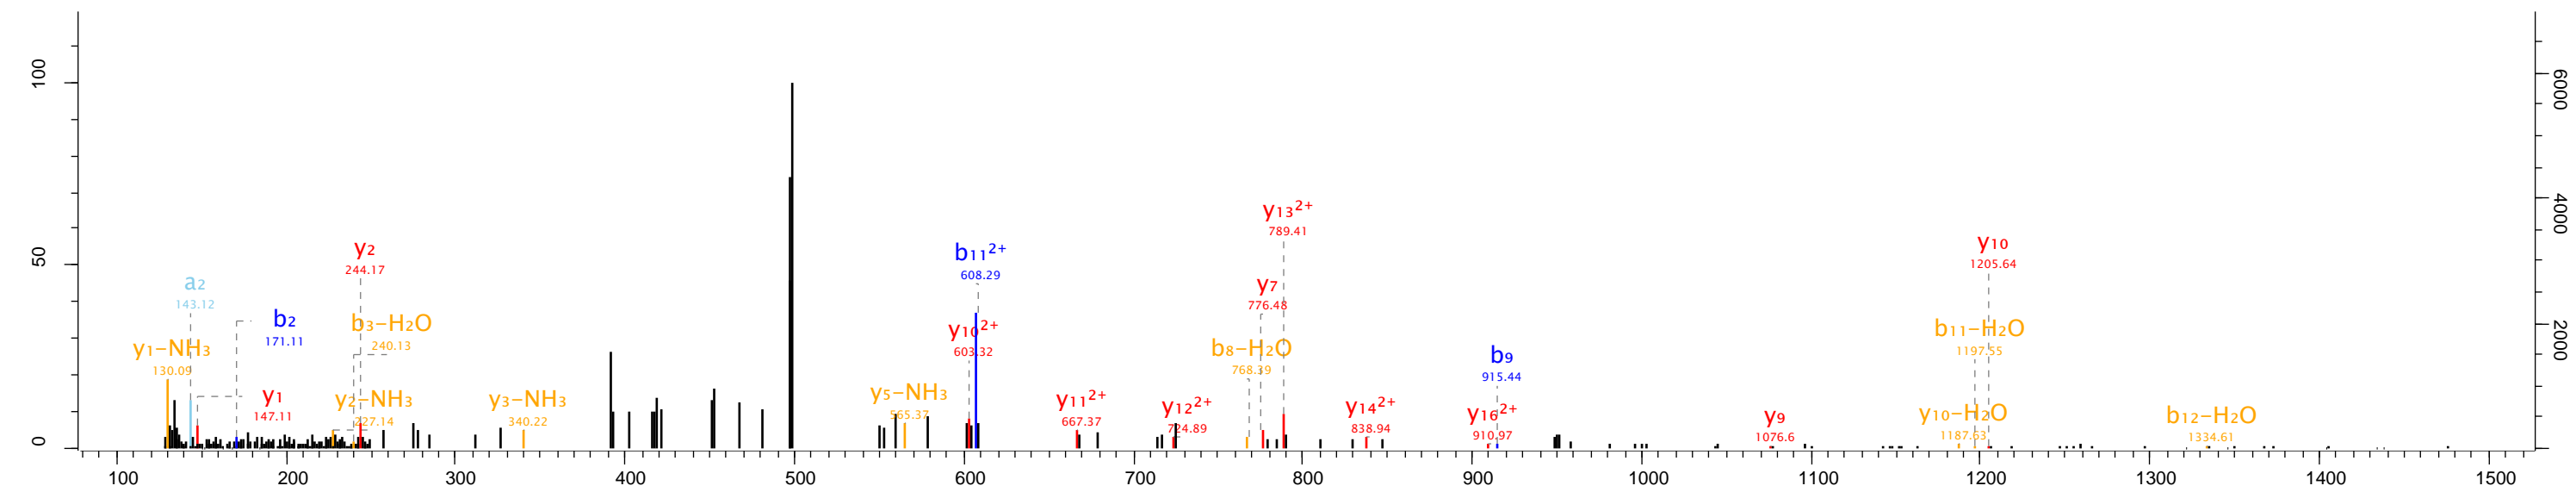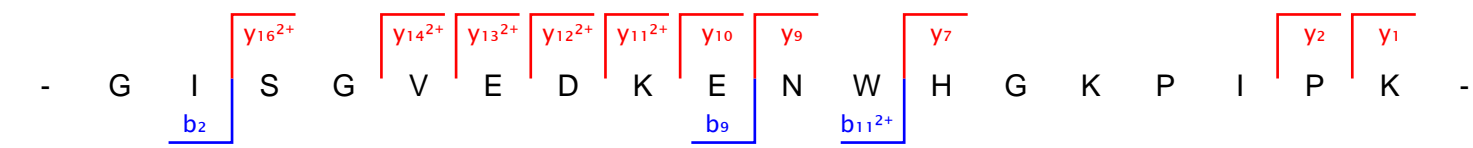

Spectral Annotation for Single-Peptide IDs between Single D11 Cells using Q-OT-LIT

Raw file 2015-01-08\_CL04\_Blastomere-15 Scan 24919 Method ITMS; HCD Score 59.84 m/z 467.26

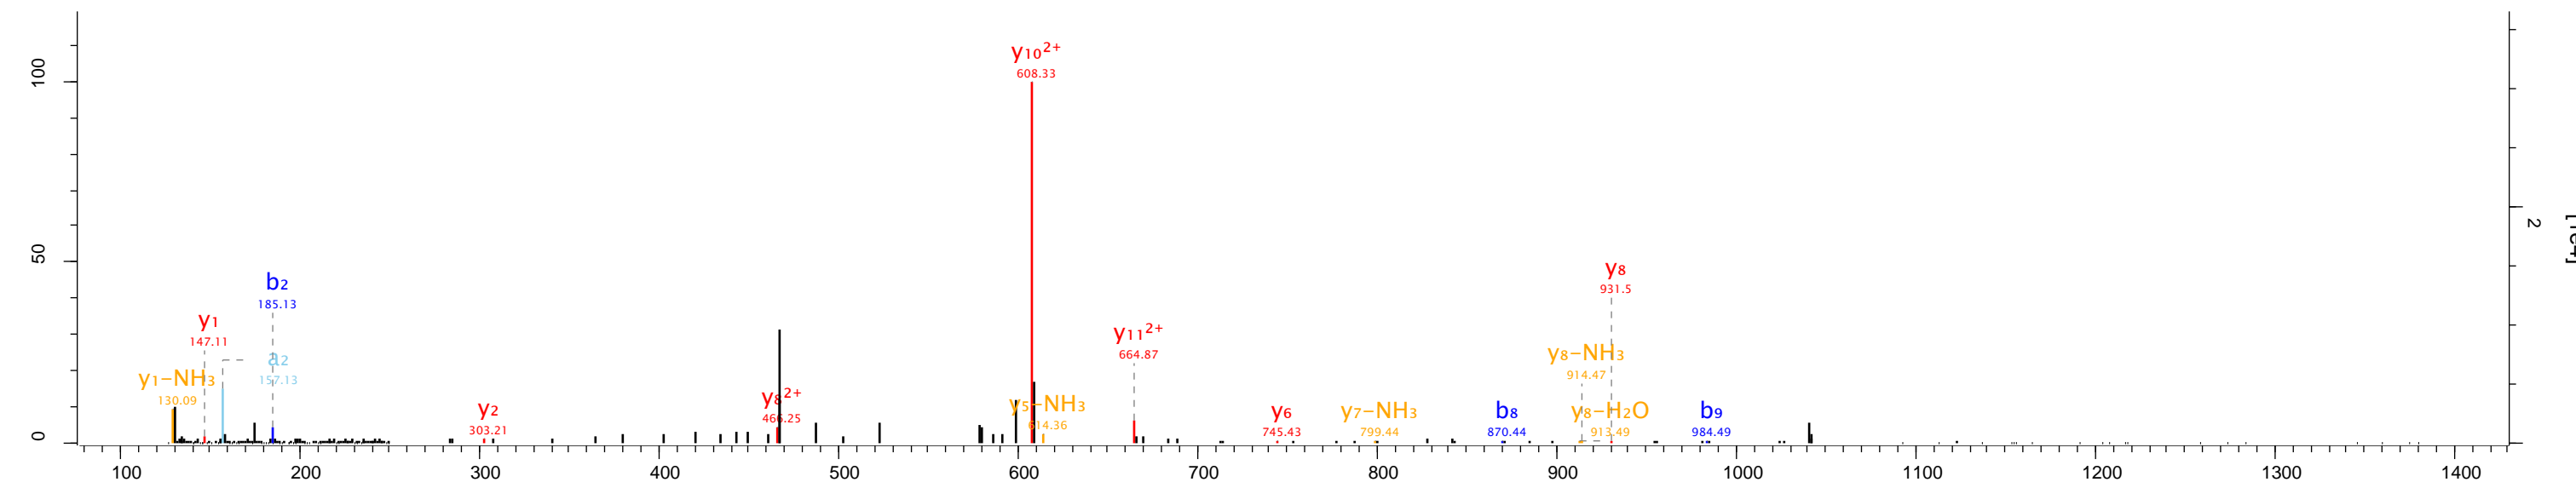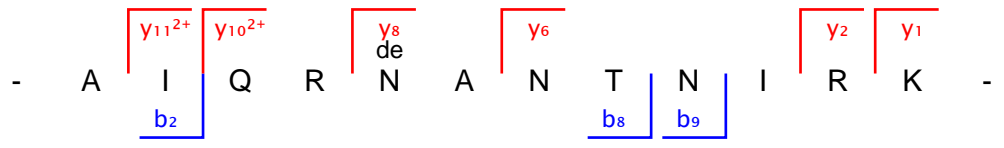

Raw file 2015-01-08\_CL04\_Blastomere-15 Scan 25996 Method ITMS; HCD Score 65.69 m/z 470.23

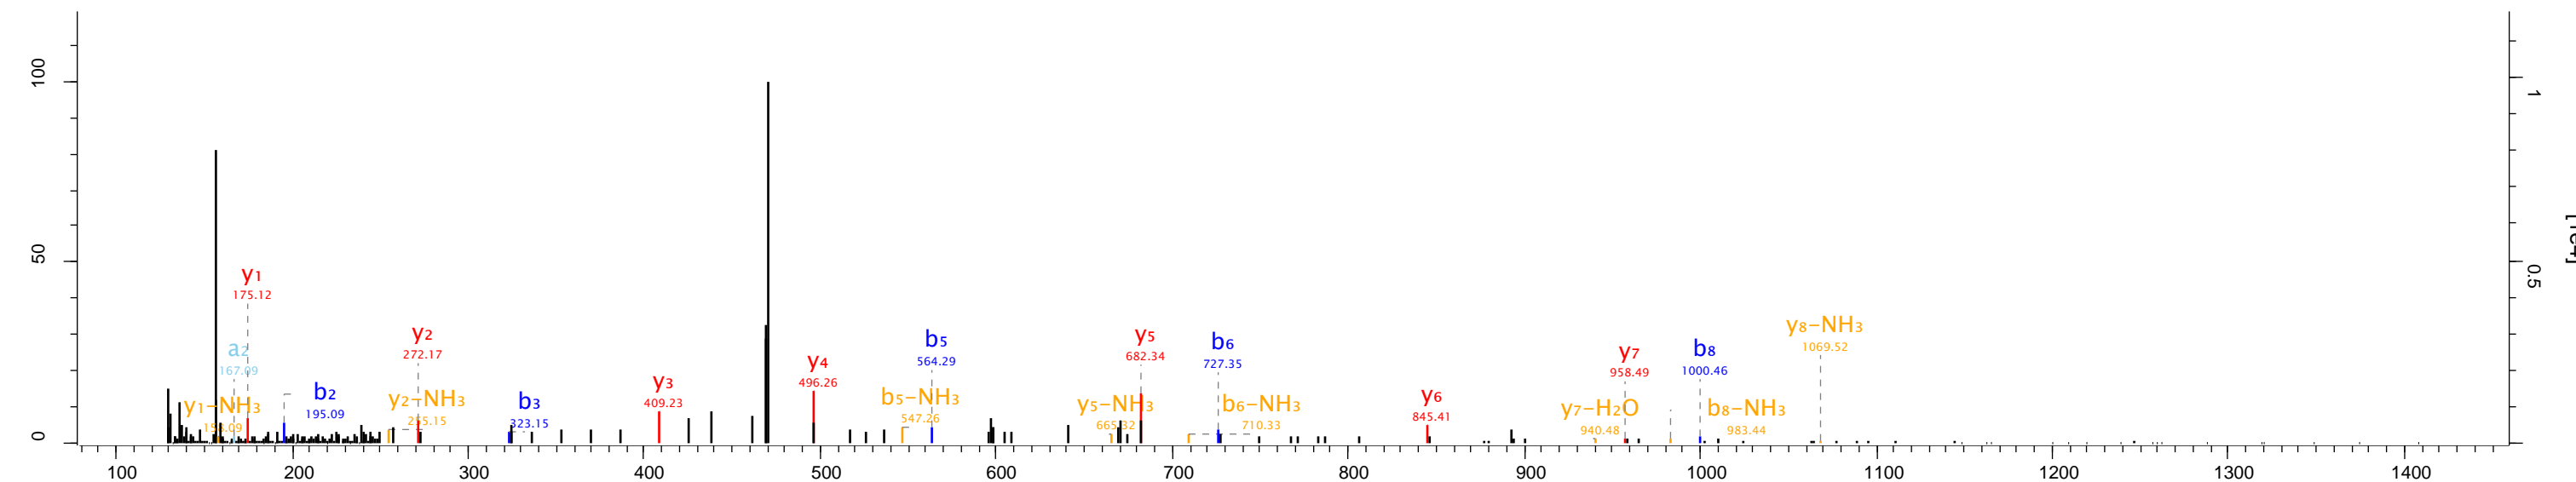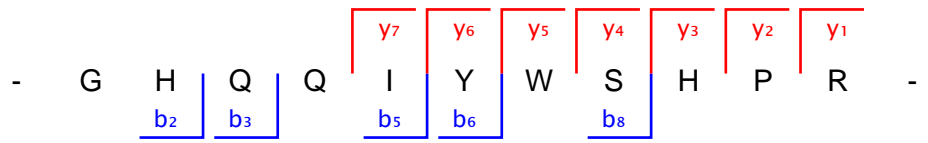

Spectral Annotation for Single-Peptide IDs between Single D11 Cells using Q-OT-LIT

Raw file  
 2015-01-08\_CL04\_Blastomere-15  
 Scan 26120 Method ITMS; HCD Score 42.87 m/z 476.23

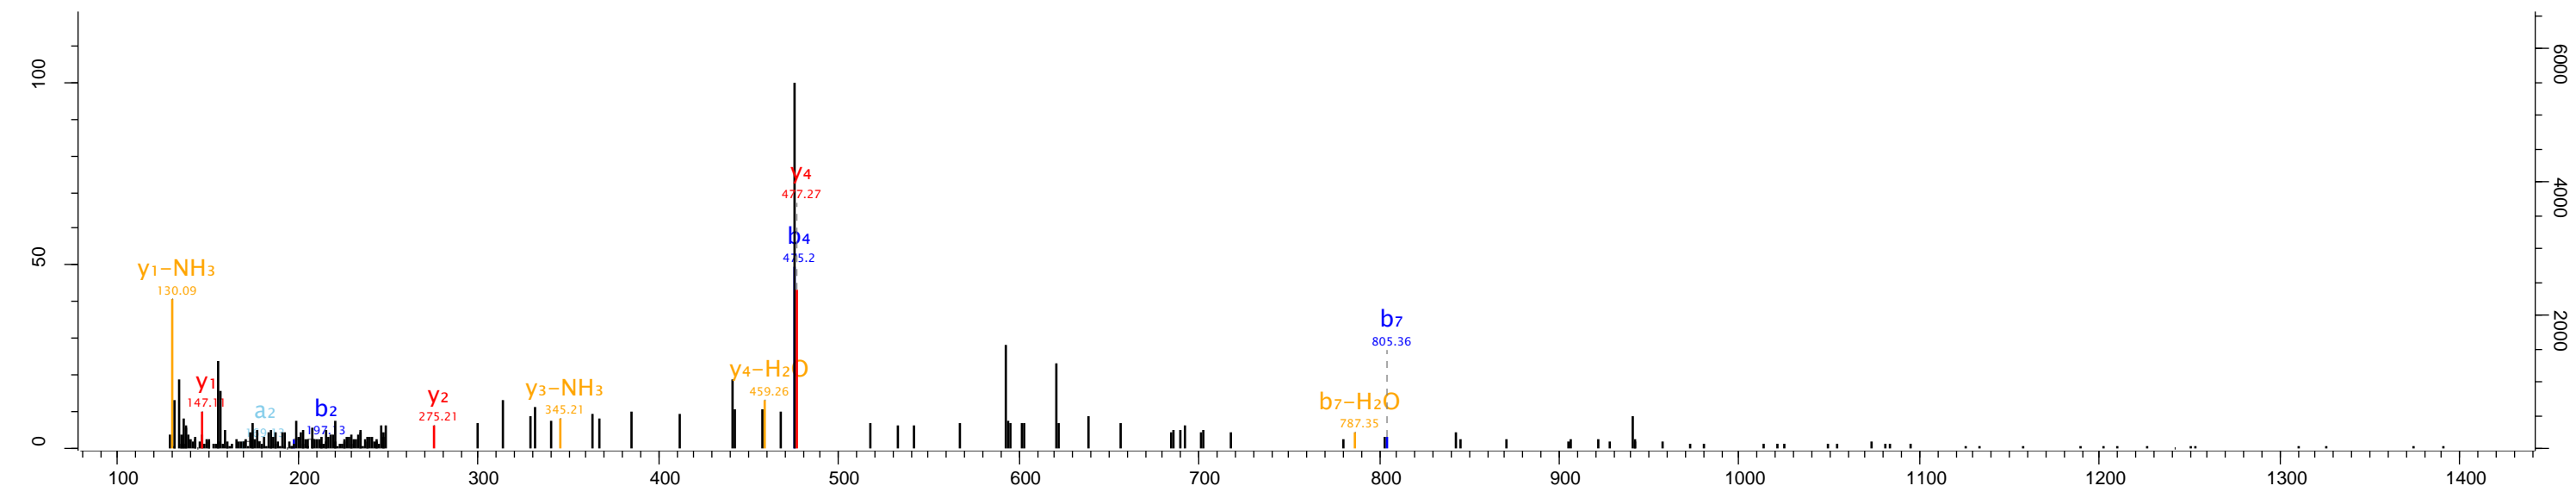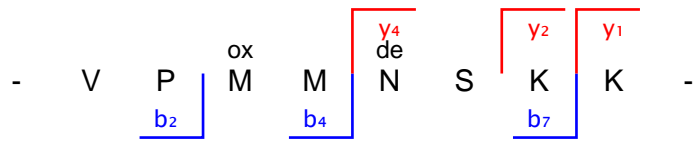

Raw file 2015-01-08\_CL04\_Blastomere-15 Scan 26124 Method ITMS; HCD Score 41.37 m/z 537.25

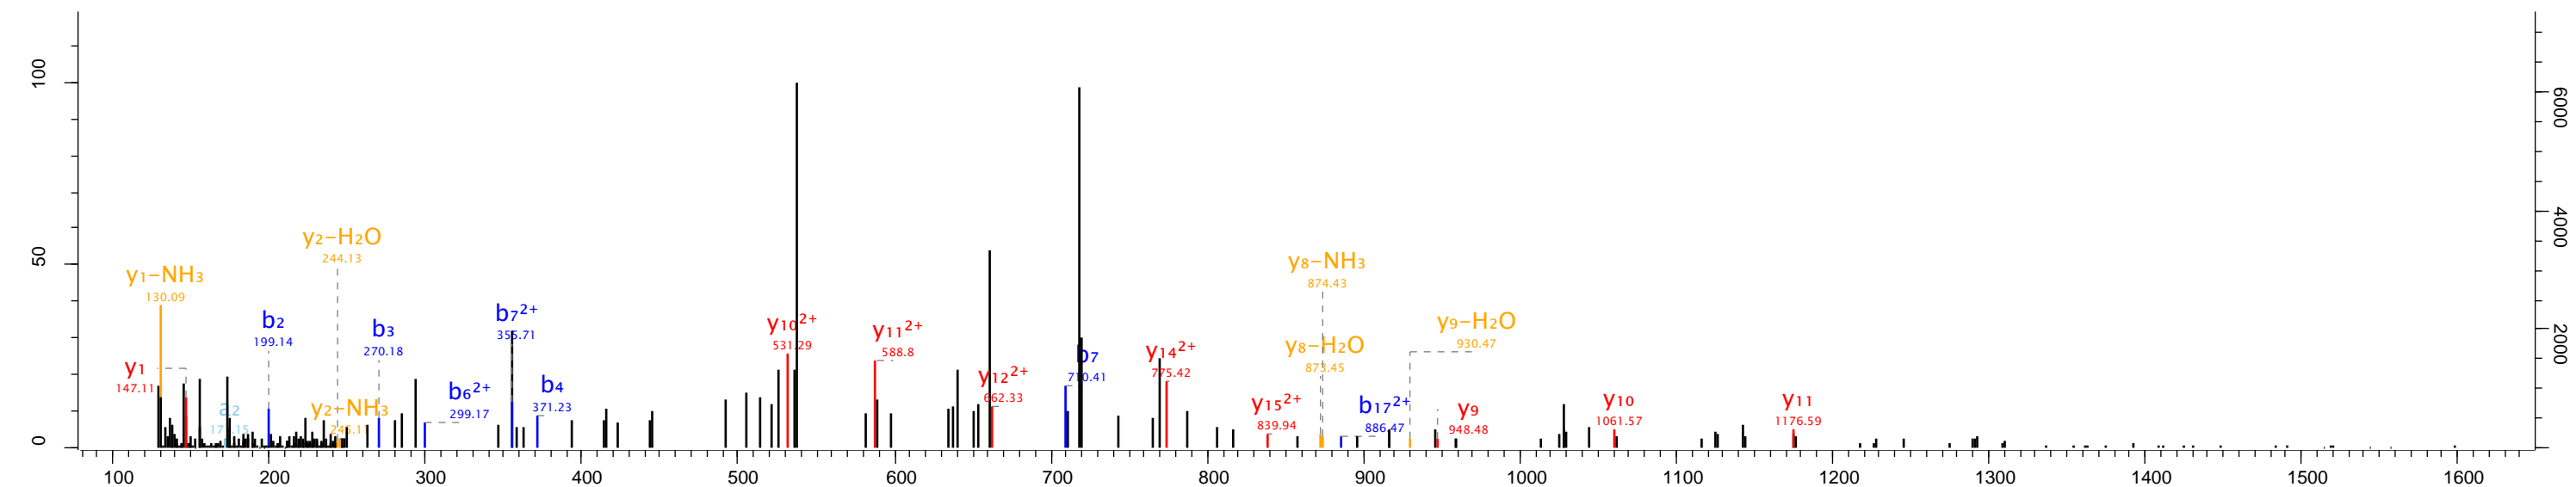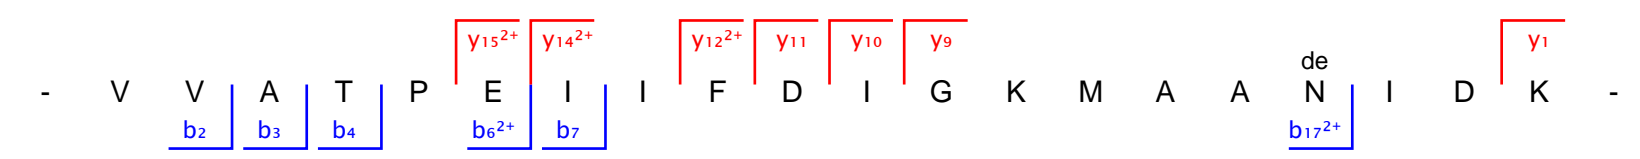

Spectral Annotation for Single-Peptide IDs between Single D11 Cells using Q-OT-LIT

Raw file 2015-01-08\_CL04\_Blastomere-15 Scan 26283 Method ITMS; HCD Score 59.23 m/z 513.28

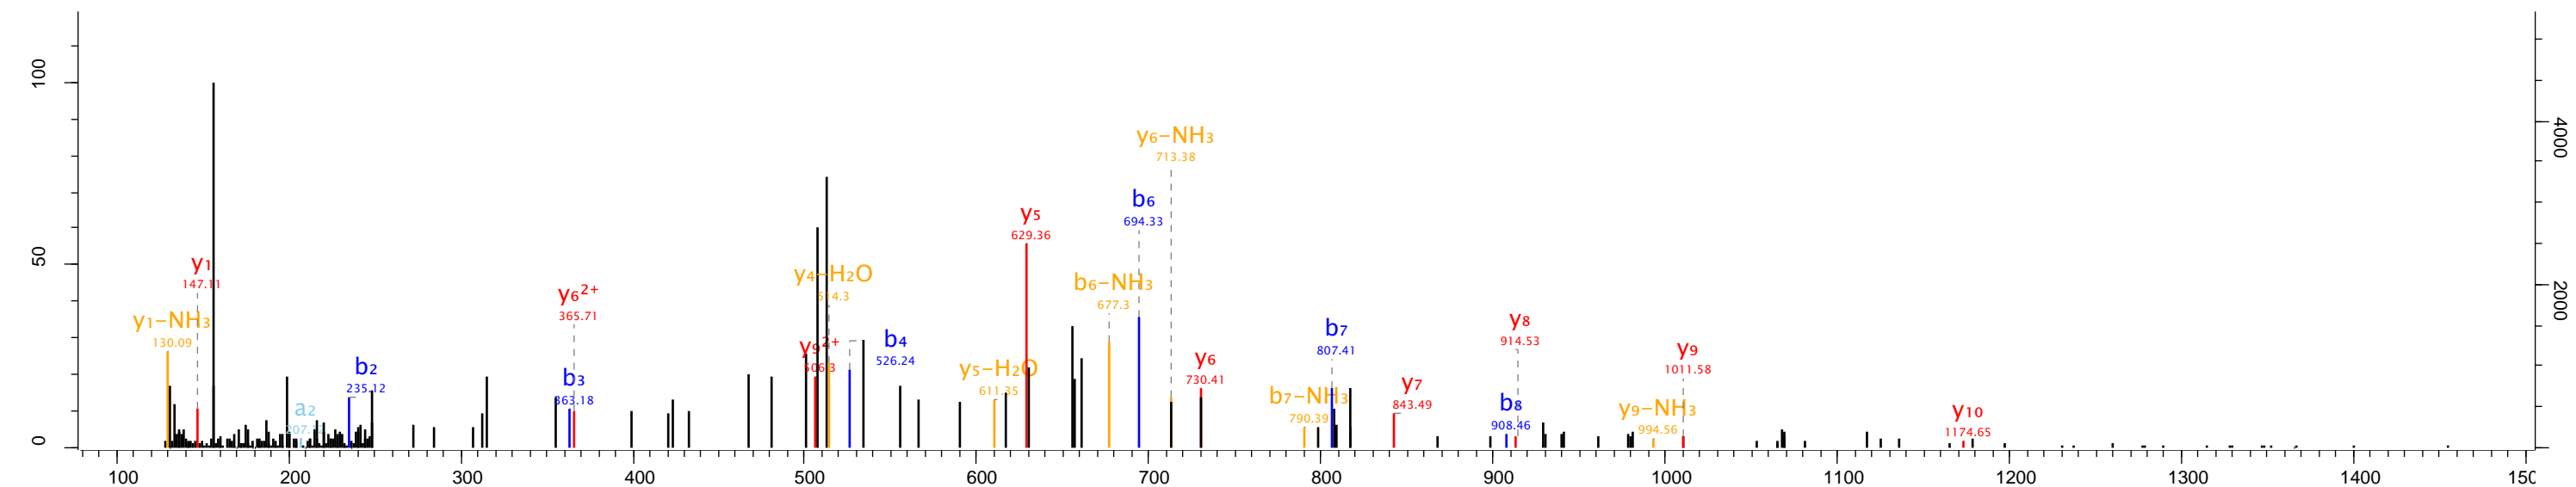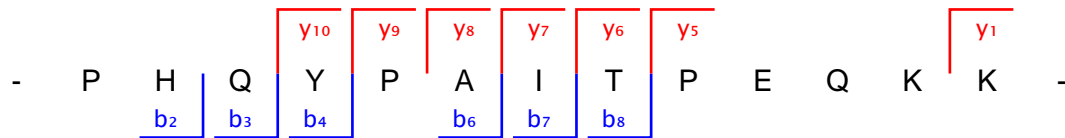

Spectral Annotation for Single-Peptide IDs between Single D11 Cells using Q-OT-LIT



Raw file 2015-01-08\_CL04\_Blastomere-15 Scan 26294 Method ITMS; HCD Score 69.85 m/z 513.28

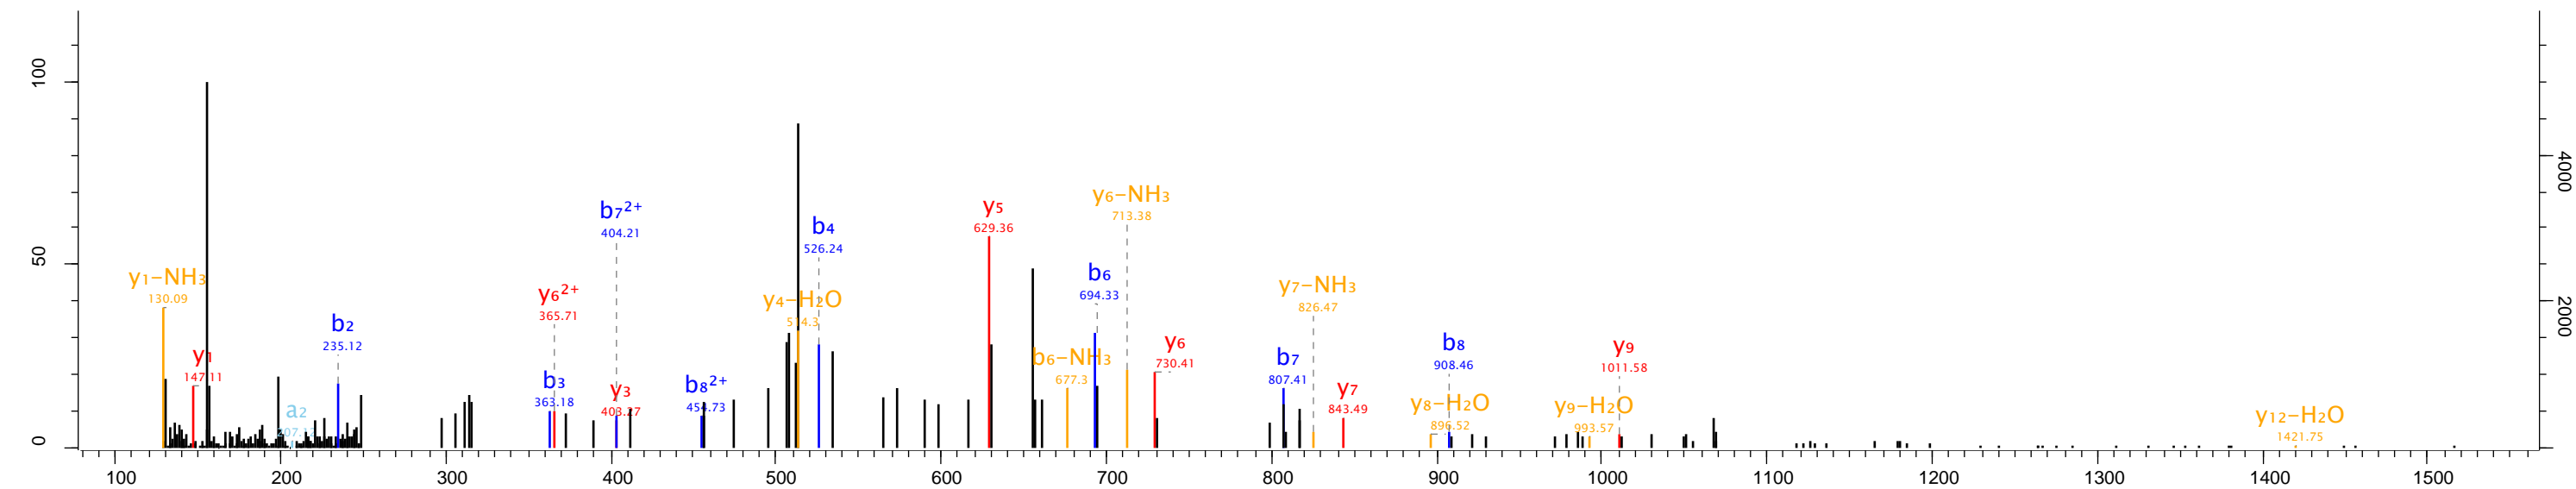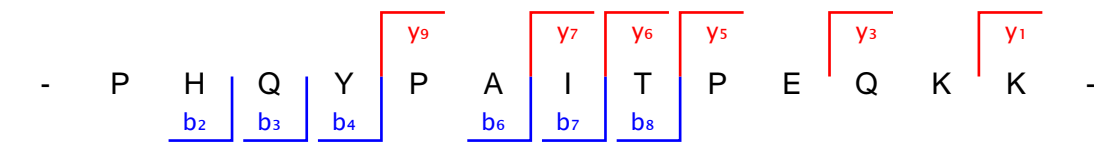

Raw file 2015-01-08\_CL04\_Blastomere-15 Scan 26306 Method ITMS; HCD Score 74.78 m/z 512.94

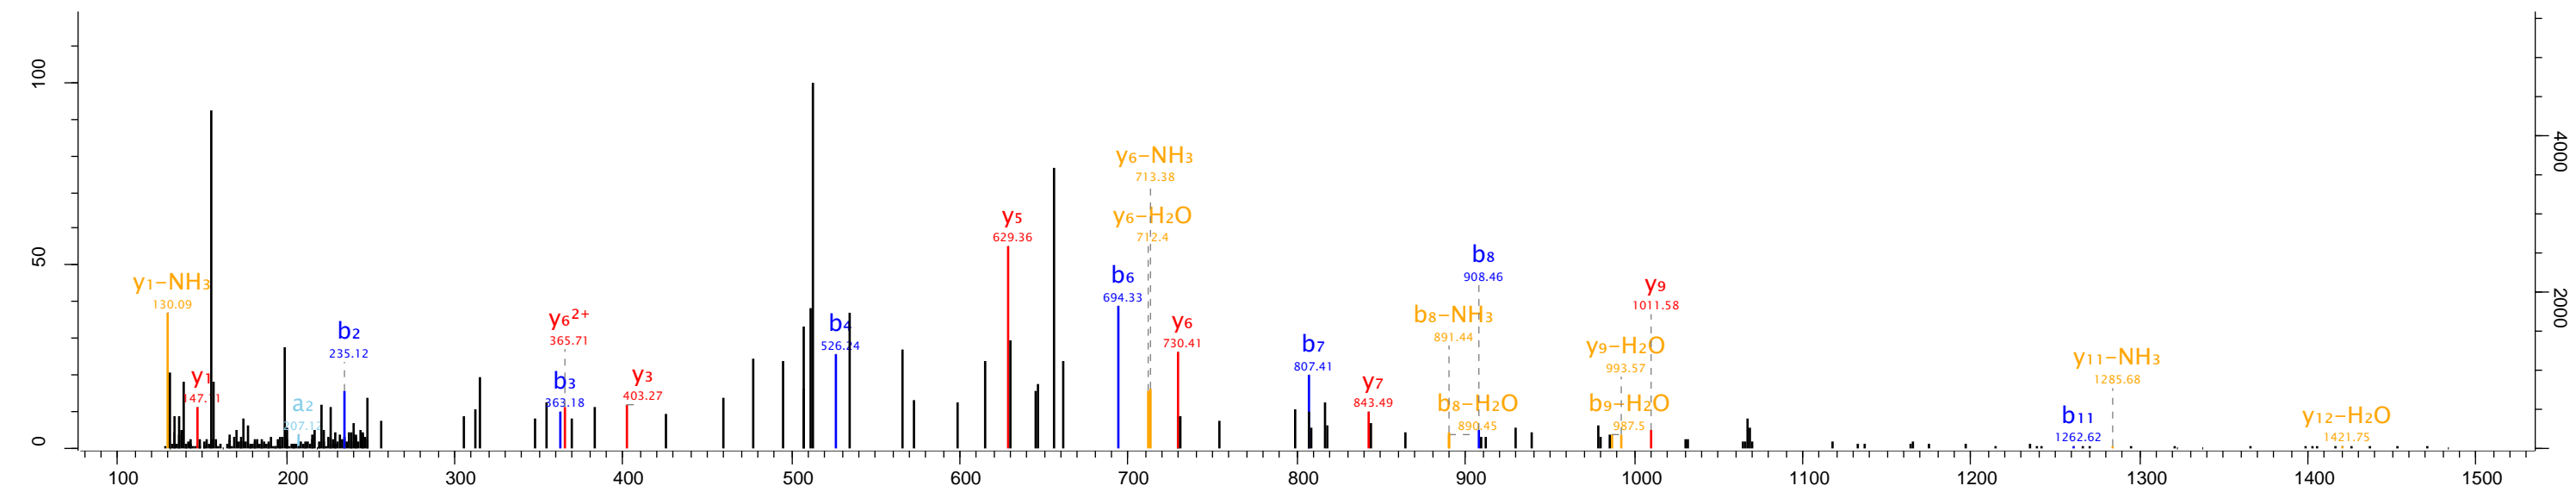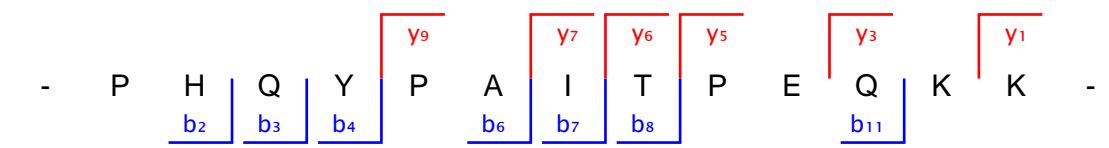

Spectral Annotation for Single-Peptide IDs between Single D11 Cells using Q-OT-LIT

Raw file 2015-01-08\_CL04\_Blastomere-15 Scan 26789 Method ITMS; HCD Score 71.28 m/z 537.61

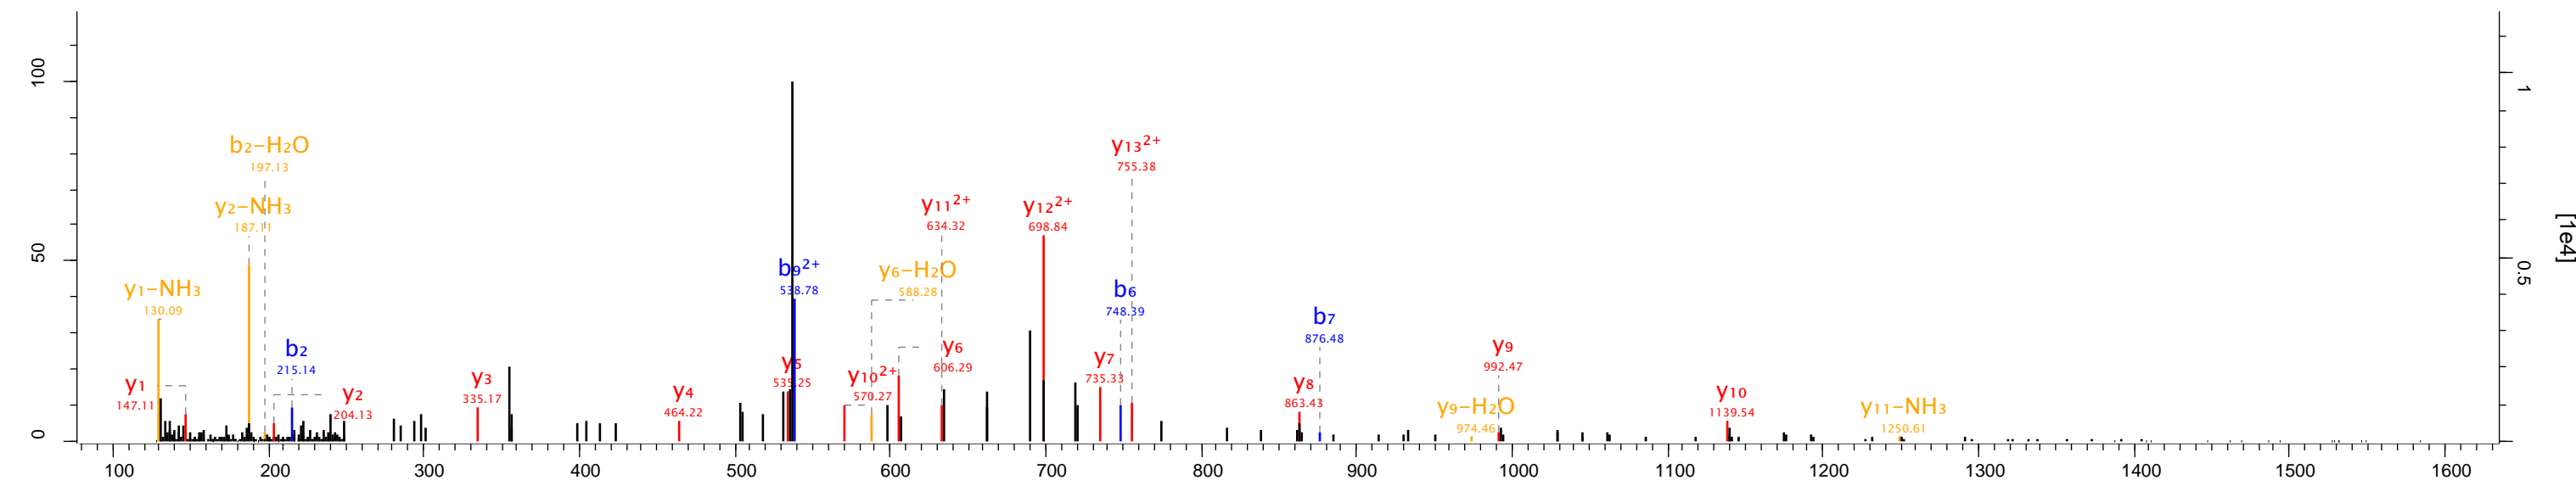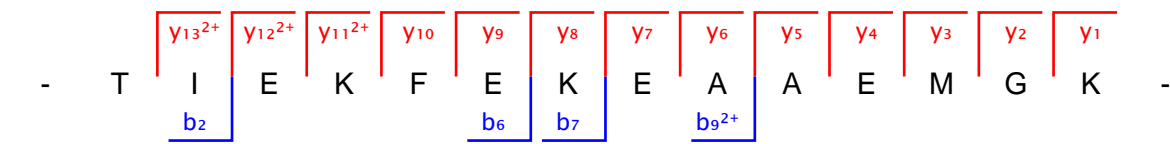

Raw file 2015-01-08\_CL04\_Blastomere-15 Scan 26855 Method ITMS; HCD Score 98.58 m/z 467.79

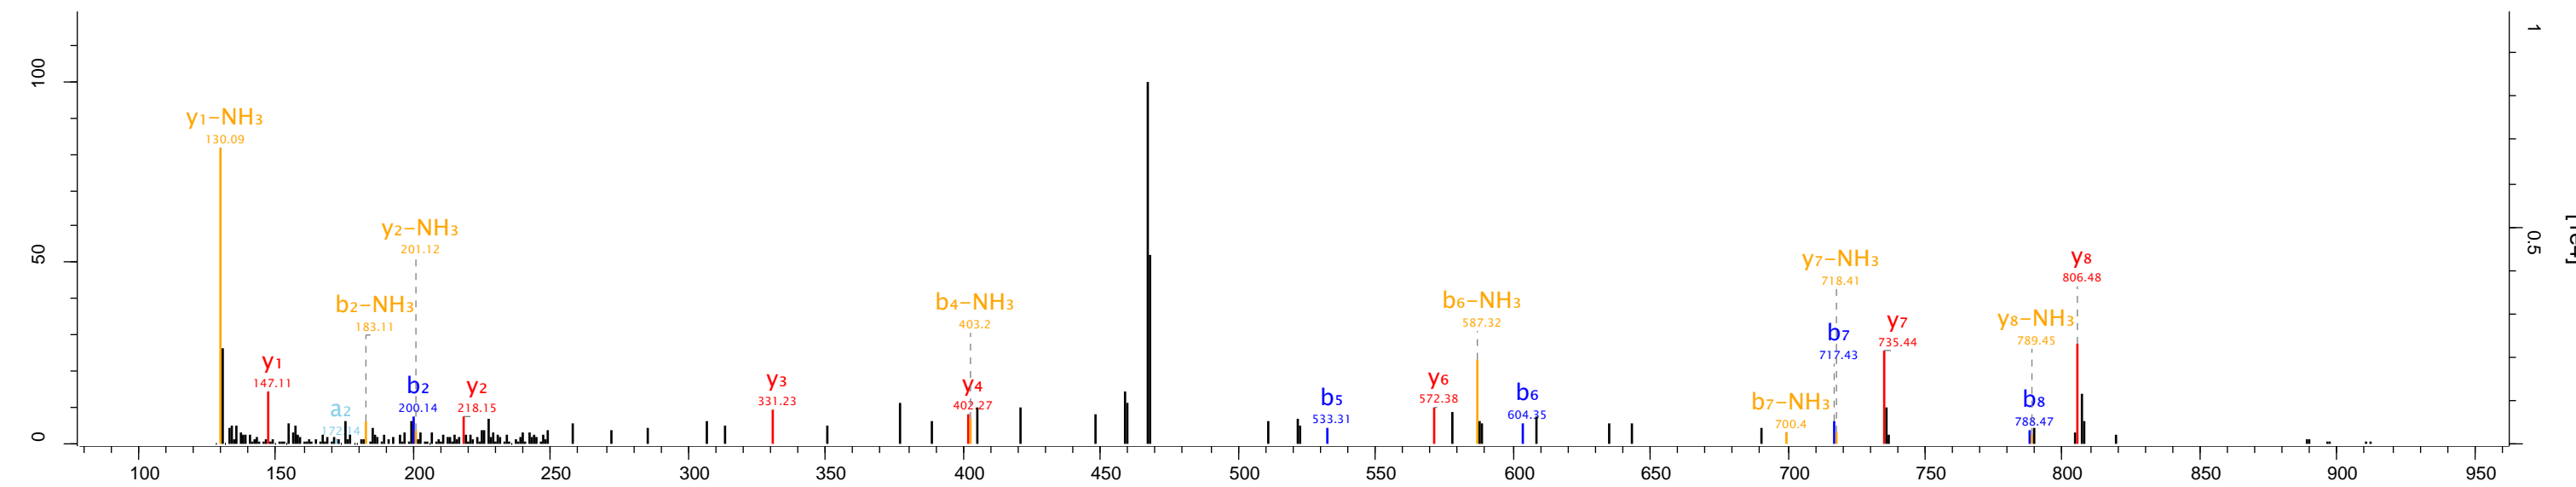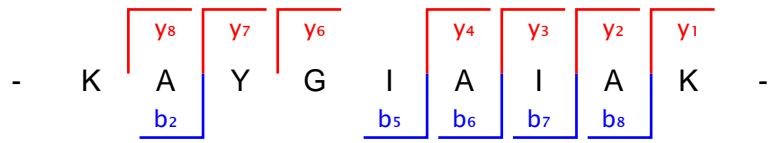

Spectral Annotation for Single-Peptide IDs between Single D11 Cells using Q-OT-LIT

Raw file 2015-01-08\_CL04\_Blastomere-15 Scan 26883 Method ITMS; HCD Score 80.22 m/z 467.79

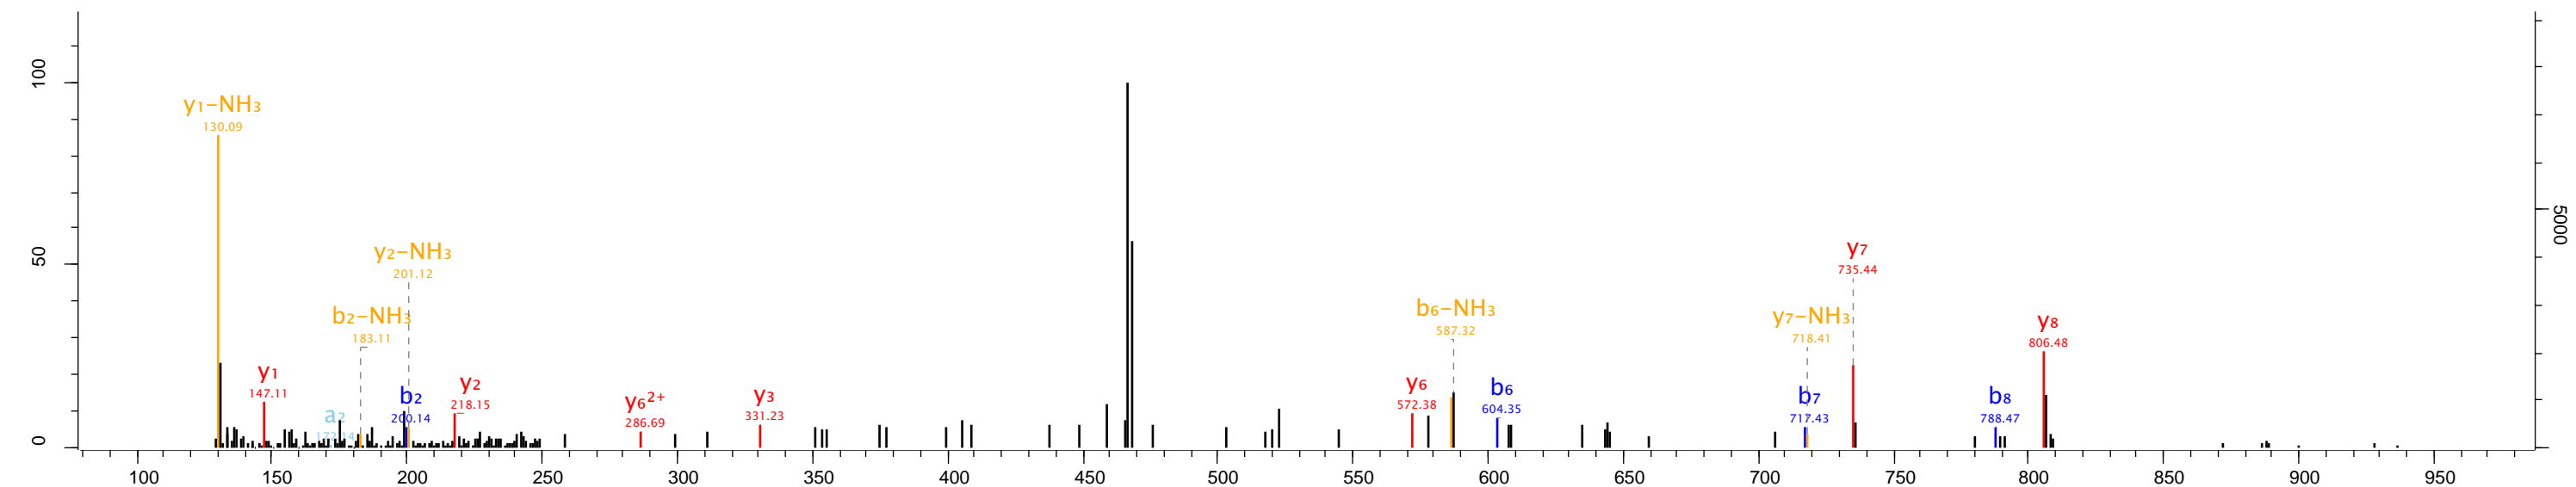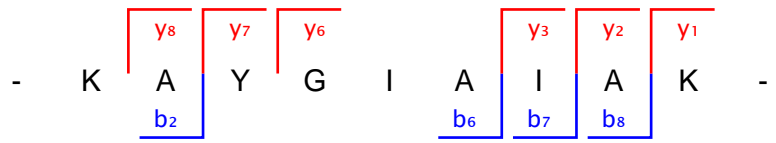

Raw file: 2015-01-08\_CL04\_Blastomere-15  
 Scan: 27103 Method: ITMS; HCD Score: 85.18 m/z: 580.03

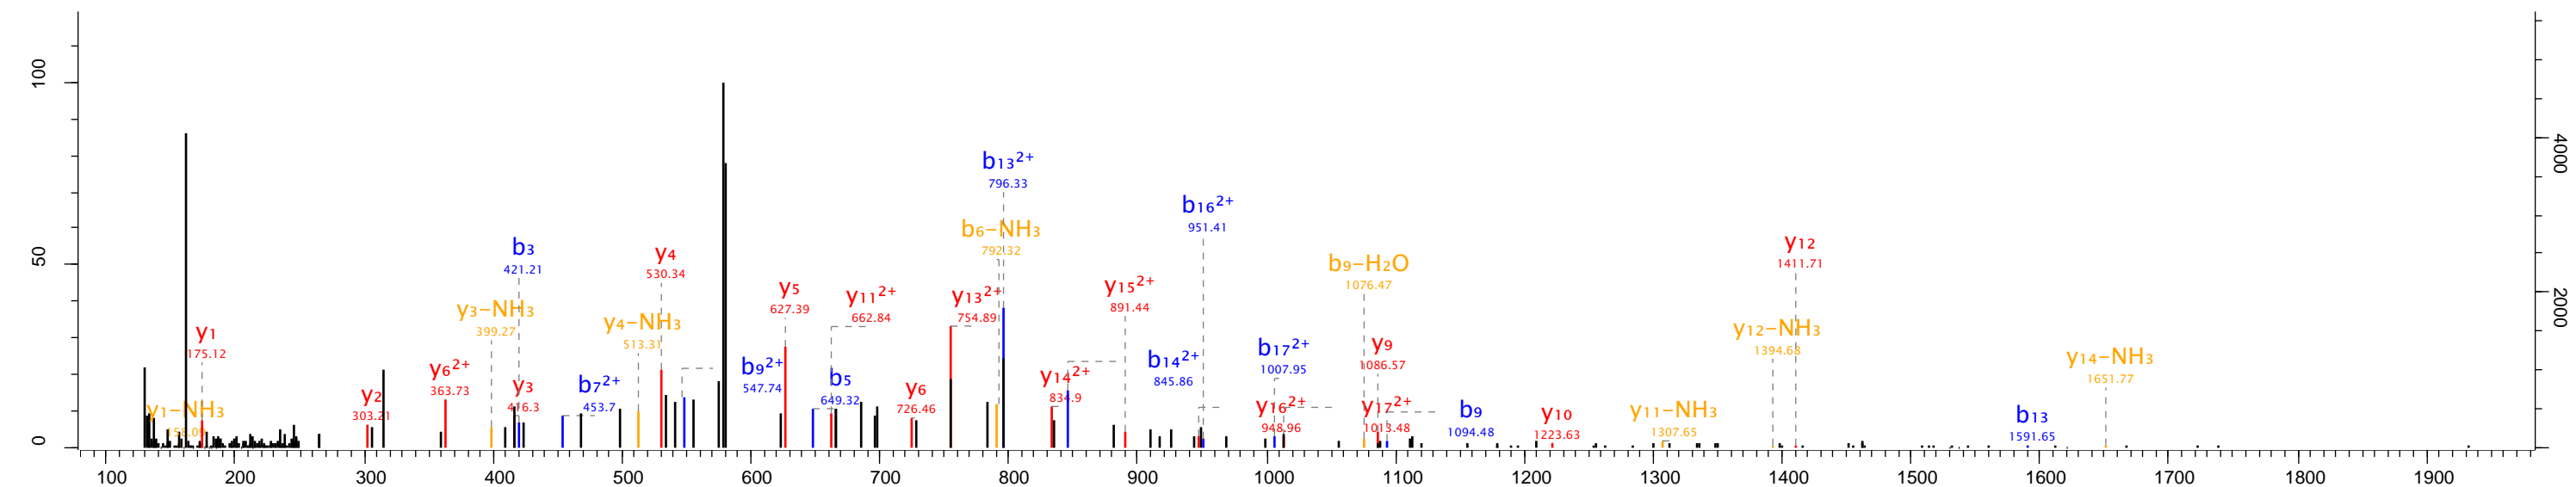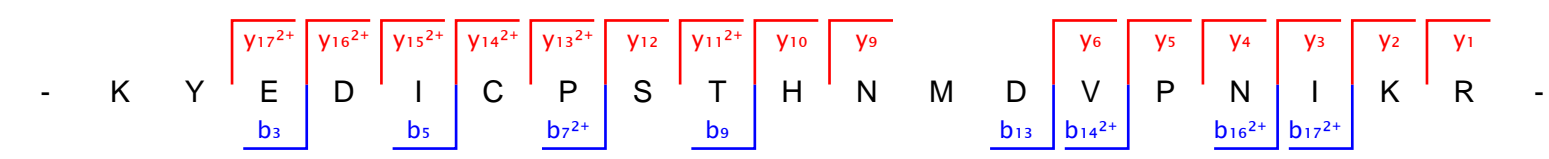

Spectral Annotation for Single-Peptide IDs between Single D11 Cells using Q-OT-LIT

Raw file 2015-01-08\_CL04\_Blastomere-15 Scan 27409 Method ITMS; HCD Score 44.44 m/z 667.83

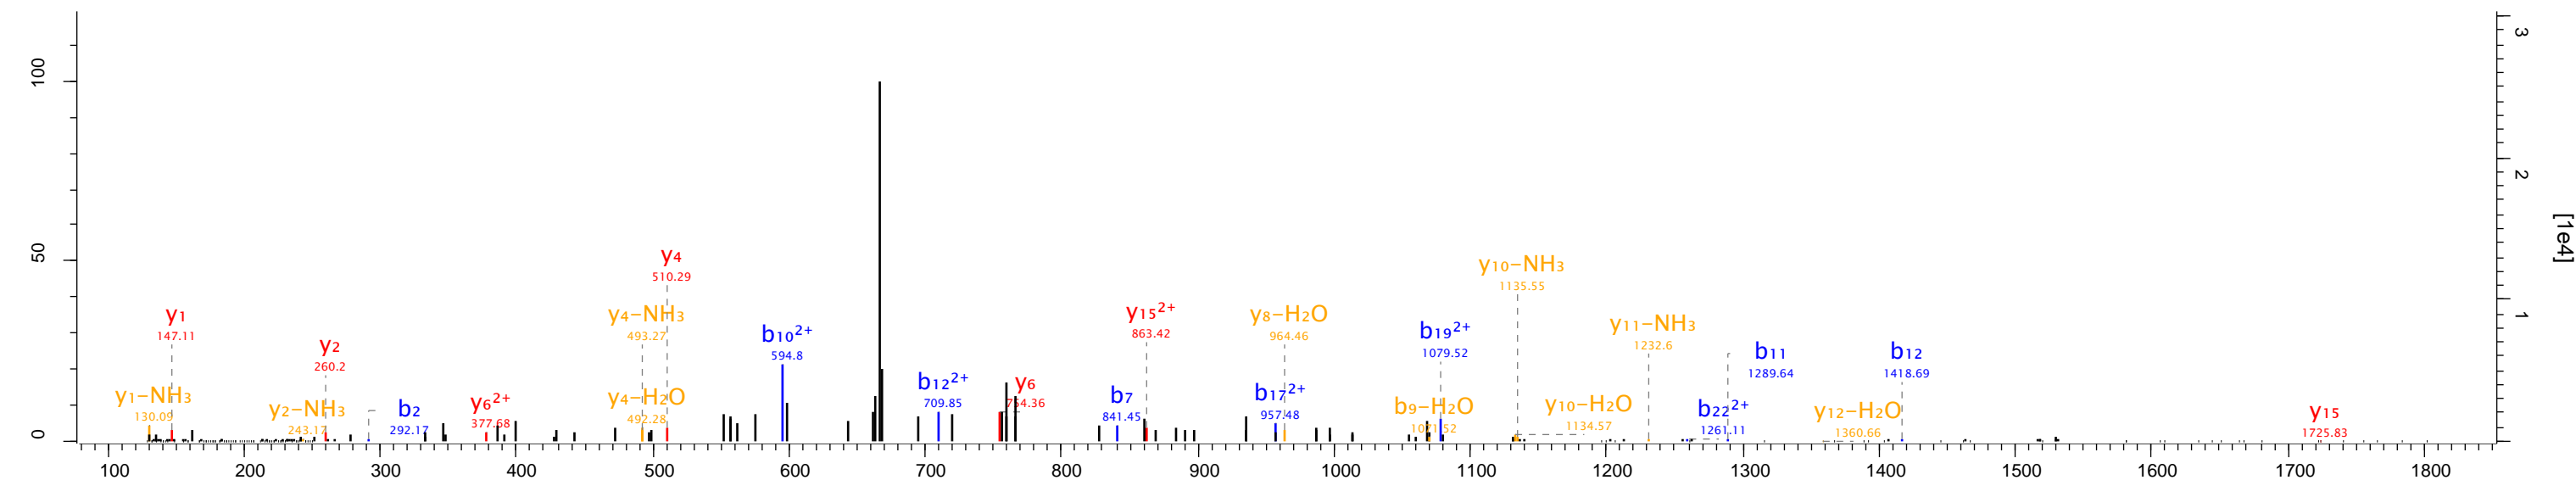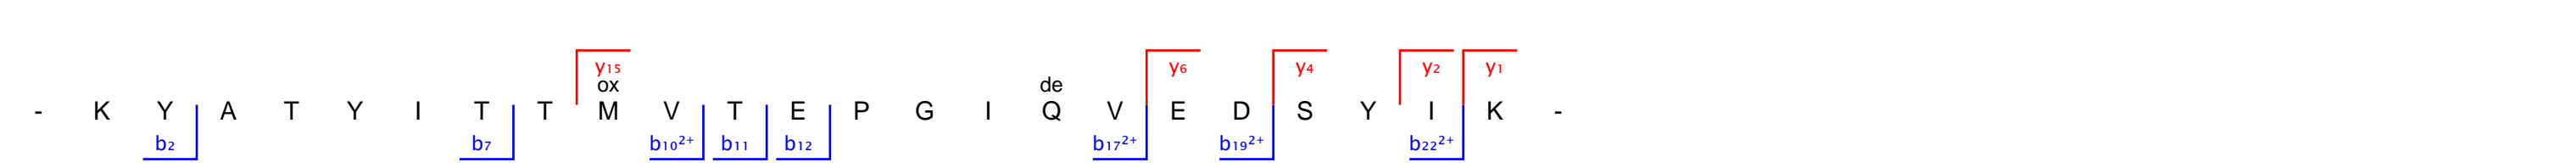

Spectral Annotation for Single-Peptide IDs between Single D11 Cells using Q-OT-LIT

Raw file 2015-01-08\_CL04\_Blastomere-15 Scan 27566 Method ITMS; HCD Score 55.2 m/z 521.92

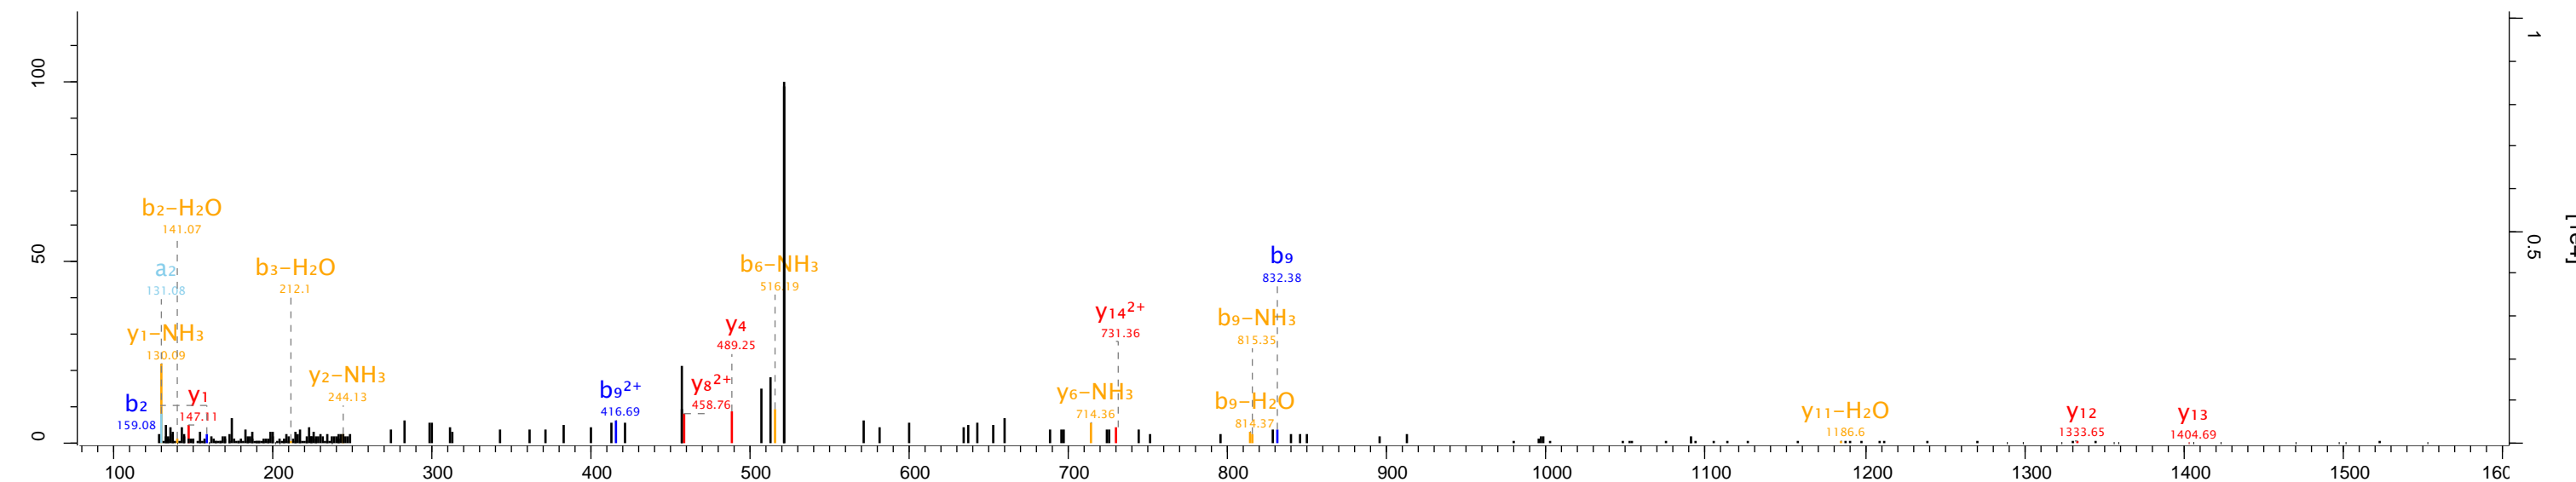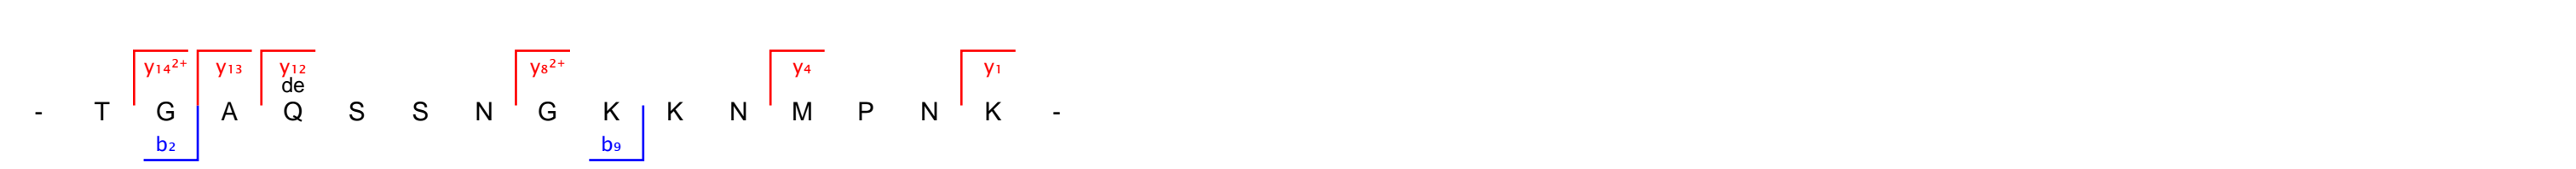

Spectral Annotation for Single-Peptide IDs between Single D11 Cells using Q-OT-LIT



Raw file 2015-01-08\_CL04\_Blastomere-15 Scan 27680 Method ITMS; HCD Score 66.2 m/z 594.56

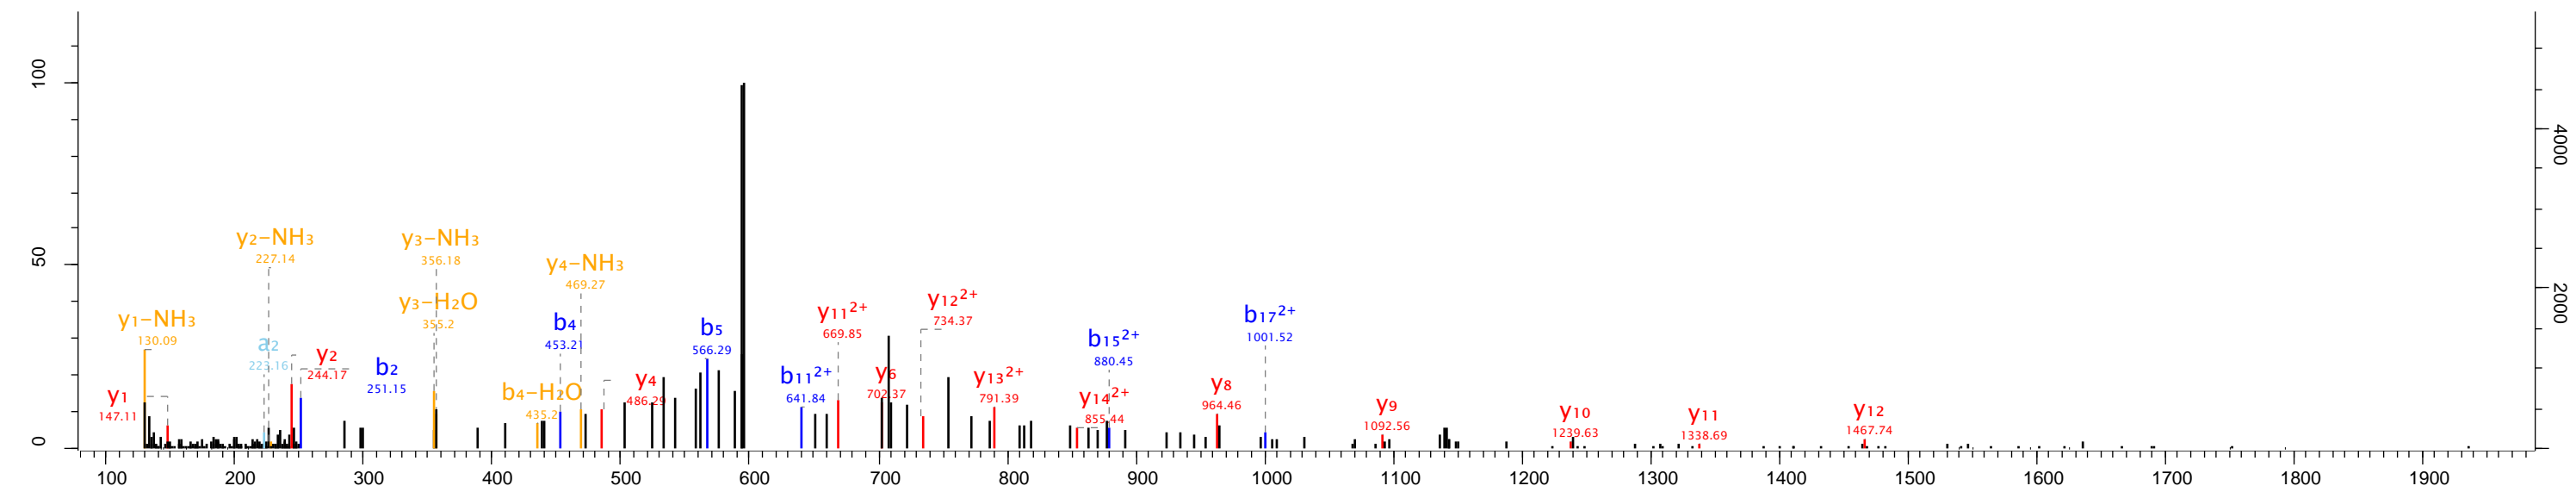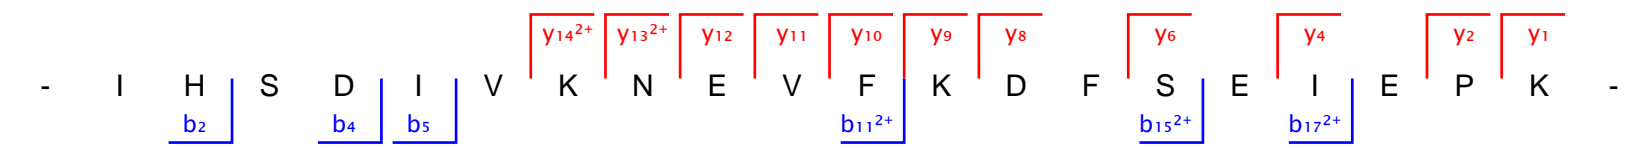

Spectral Annotation for Single-Peptide IDs between Single D11 Cells using Q-OT-LIT

Raw file 2015-01-08\_CL04\_Blastomere-15  
 Scan 28278 Method ITMS; HCD Score 45.58 m/z 692.73

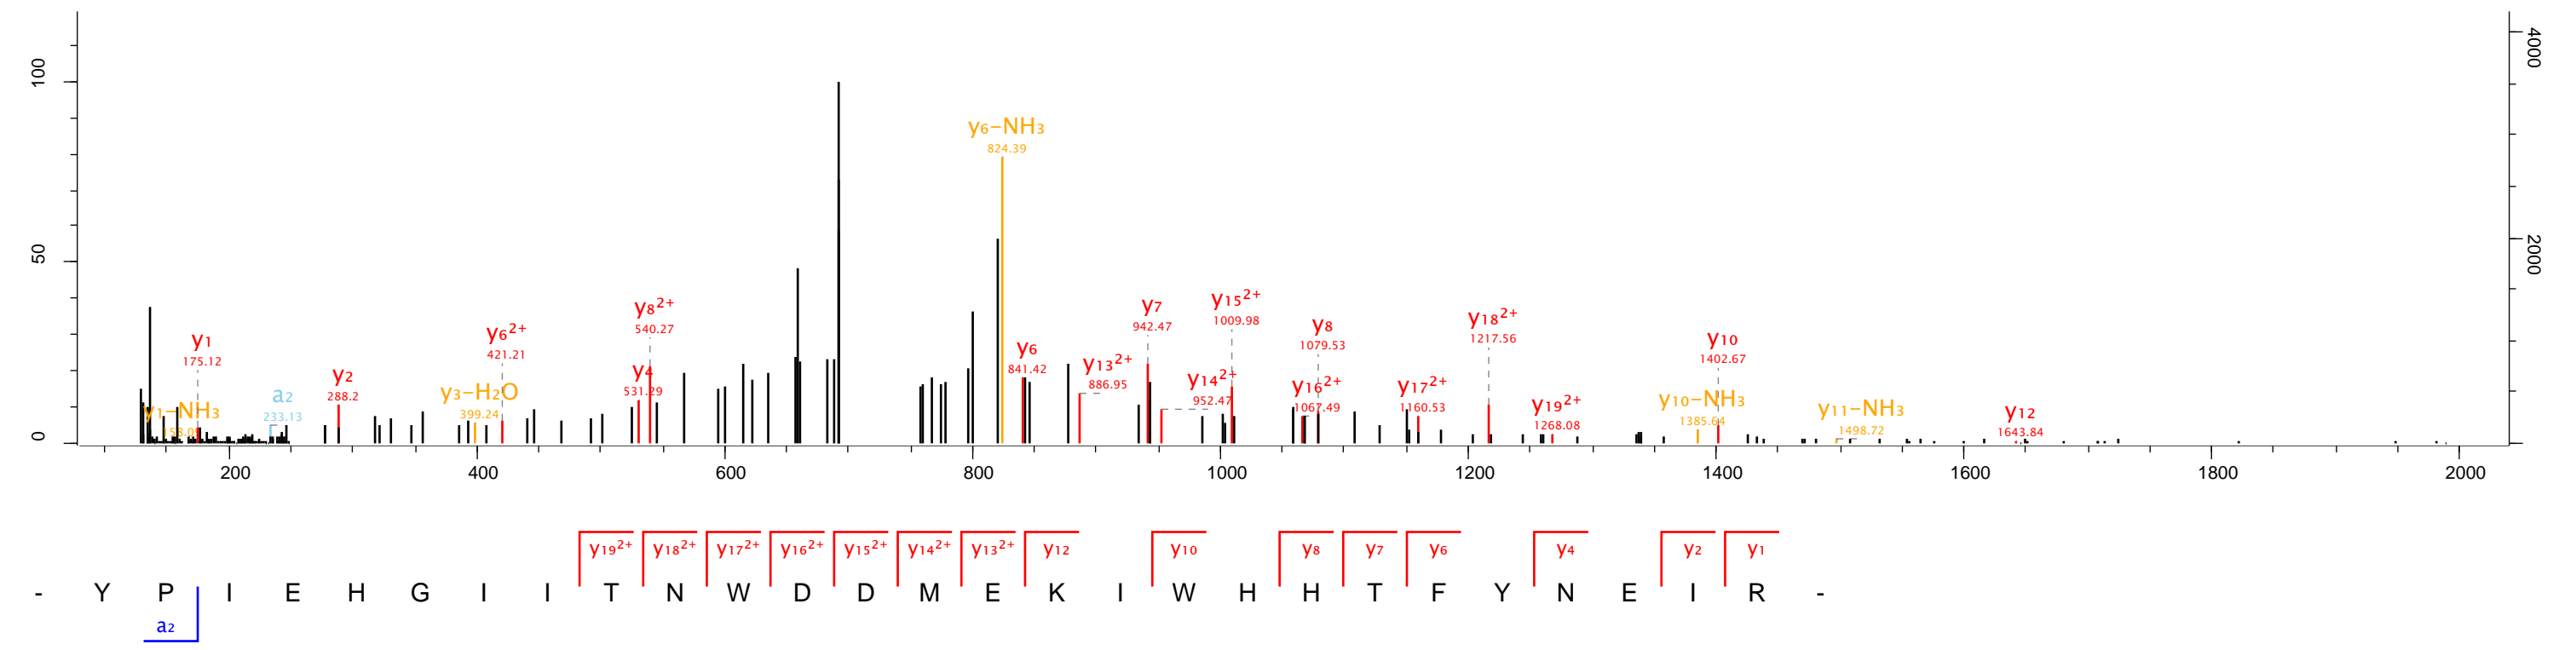

Raw file 2015-01-08\_CL04\_Blastomere-15 Scan 28291 Method ITMS; HCD Score 49.18 m/z 692.53

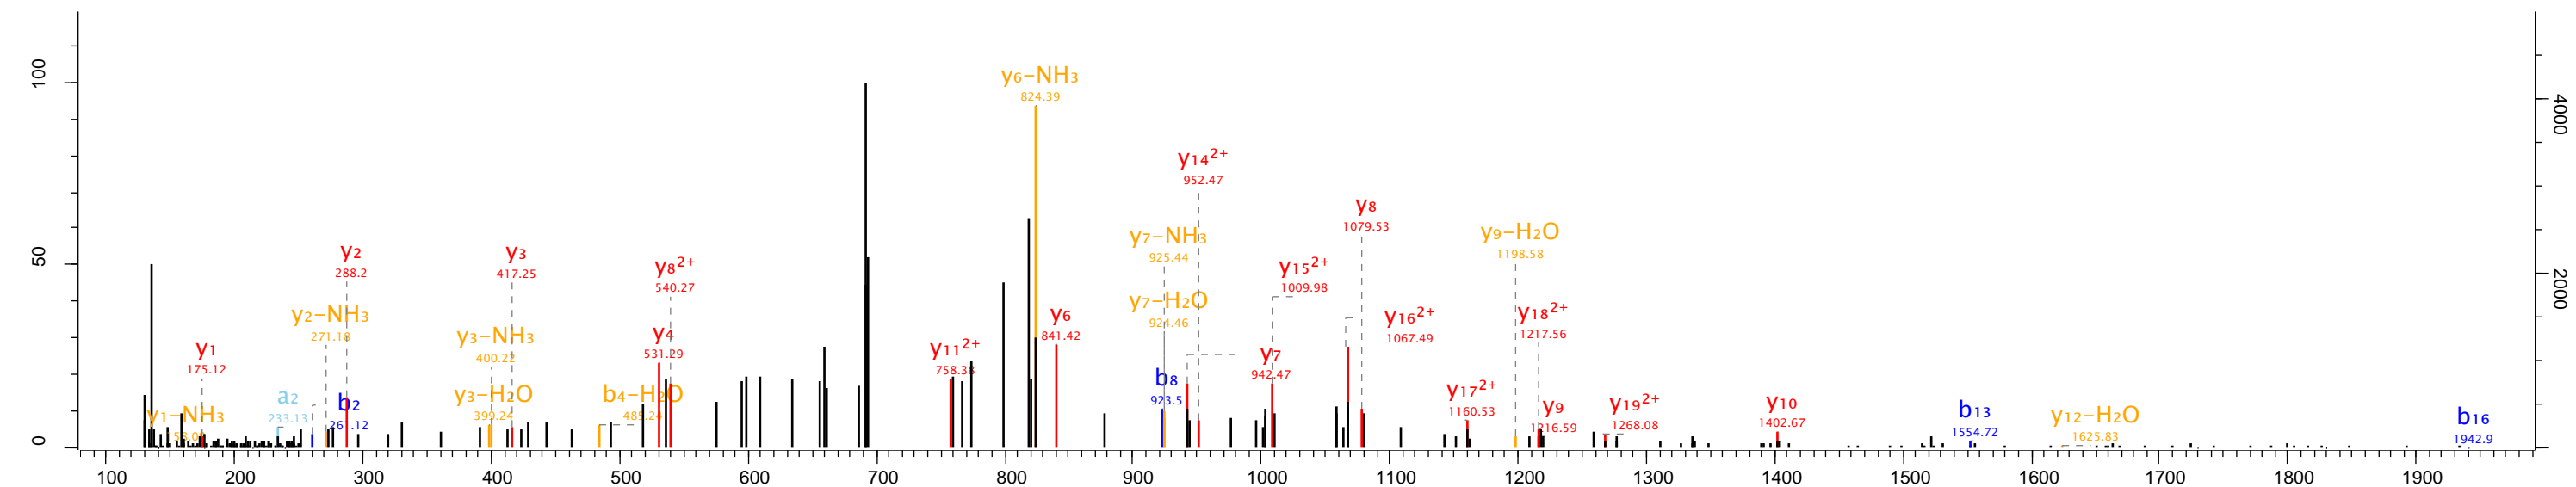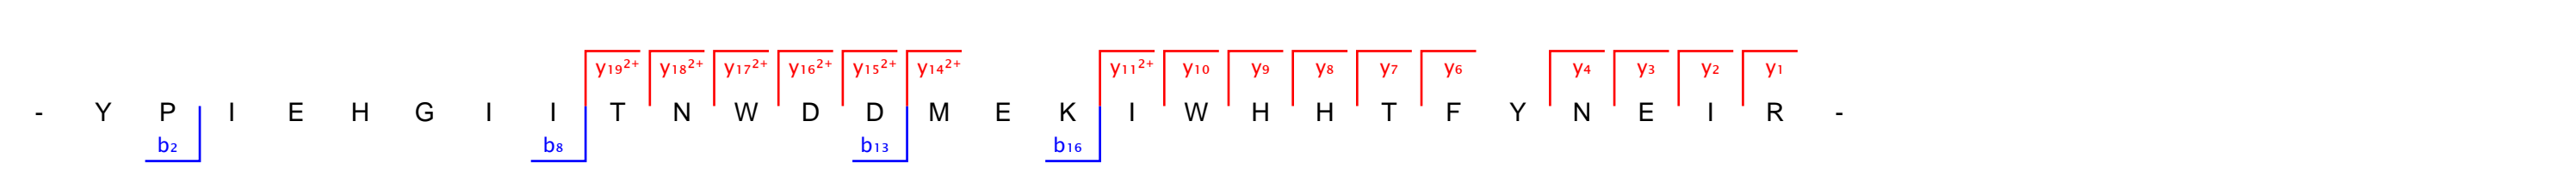

Spectral Annotation for Single-Peptide IDs between Single D11 Cells using Q-OT-LIT

Raw file 2015-01-08\_CL04\_Blastomere-15 Scan 28311 Method ITMS; HCD Score 43.05 m/z 649.66

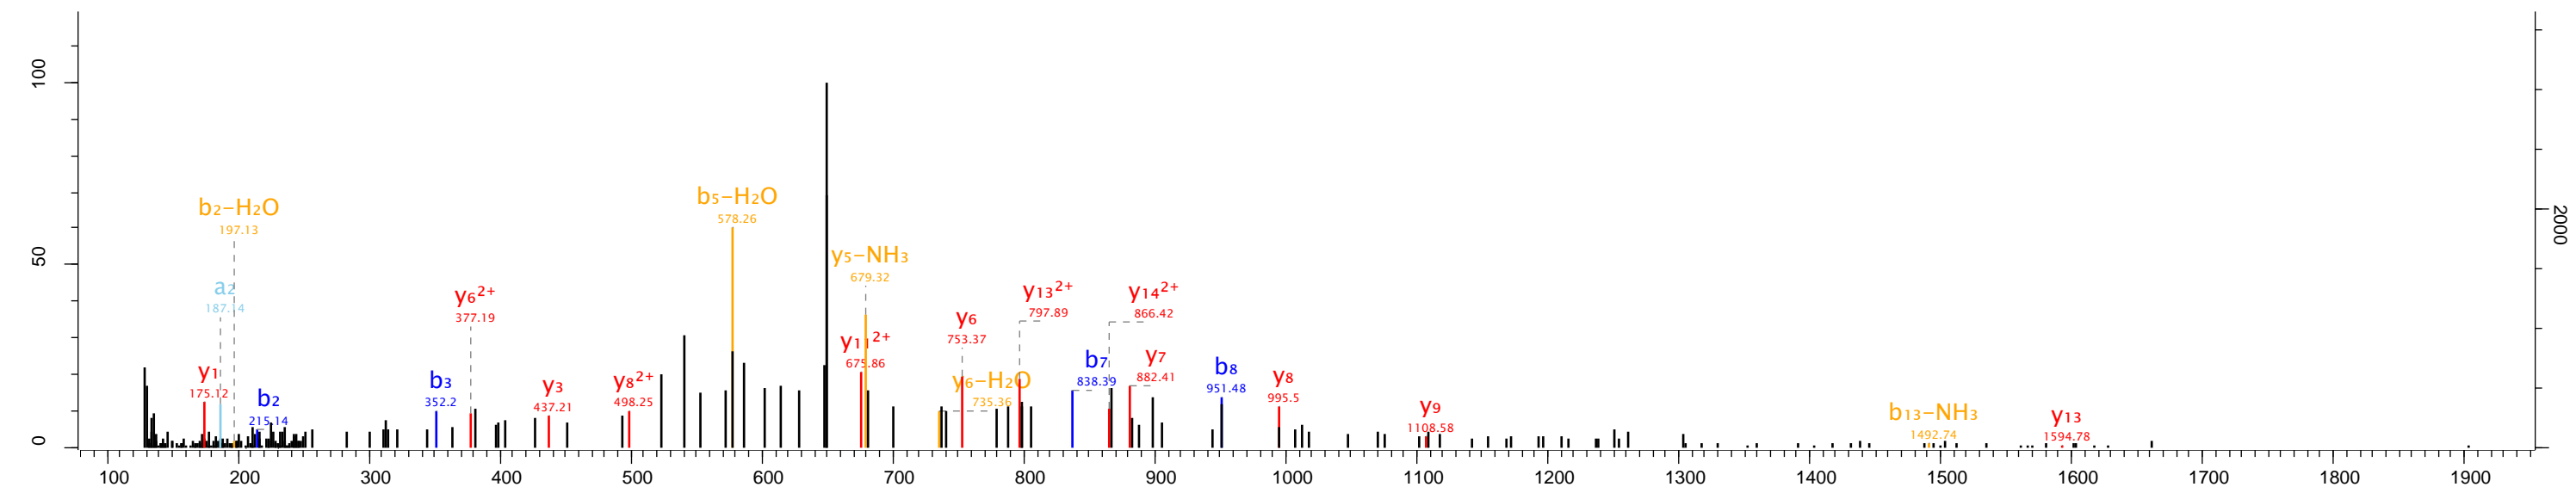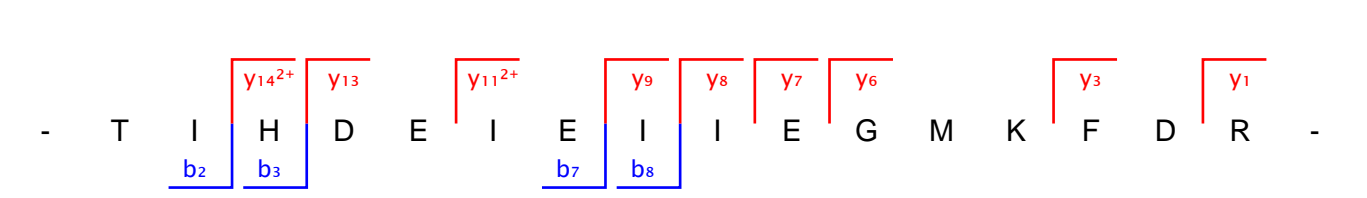

Spectral Annotation for Single-Peptide IDs between Single D11 Cells using Q-OT-LIT

Raw file 2015-01-08\_CL04\_Blastomere-15  
 Scan 28319 Method ITMS; HCD Score 57.24 m/z 692.53

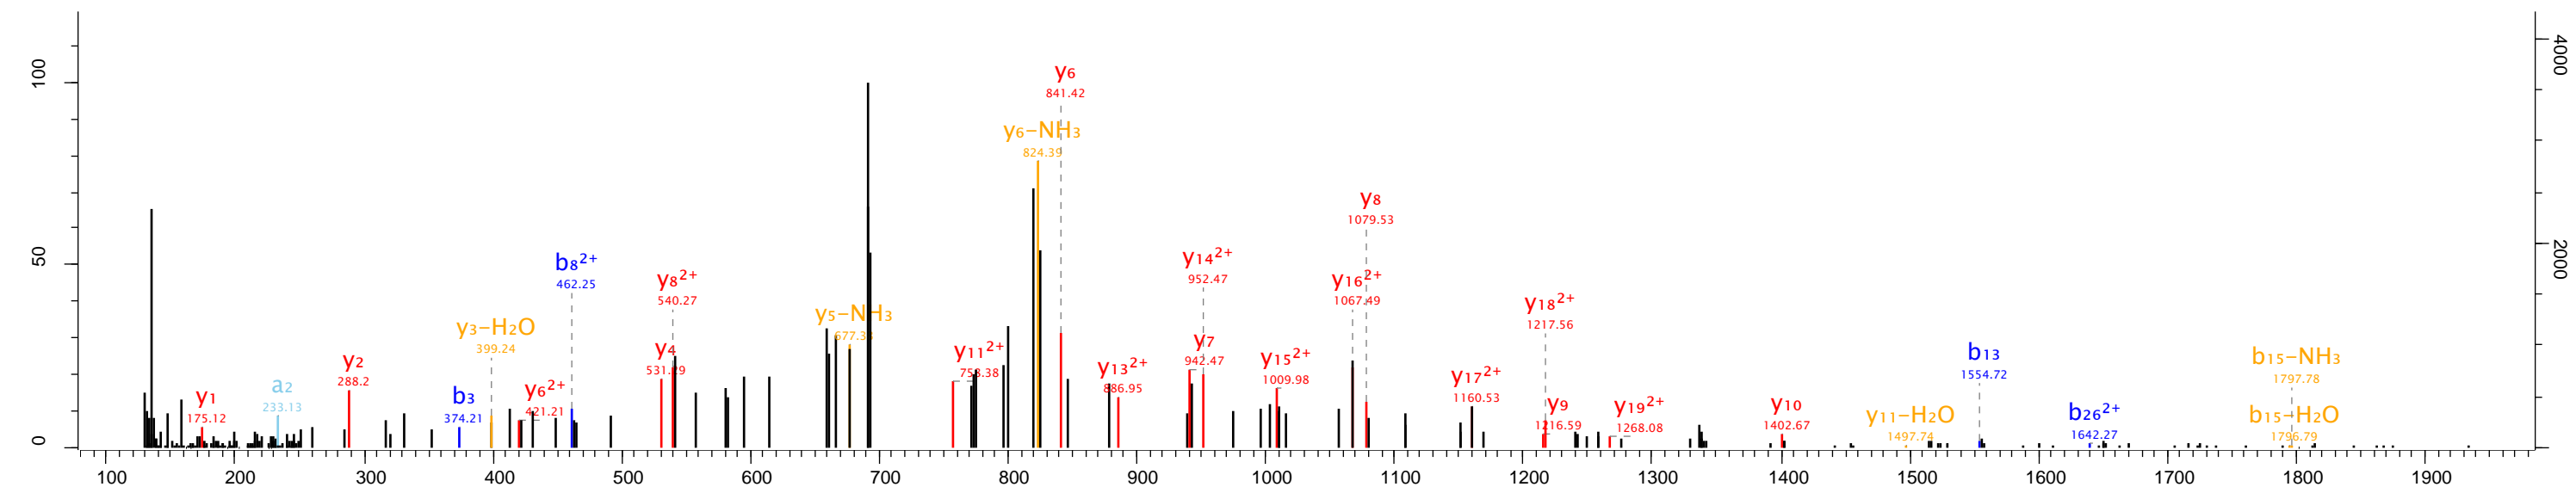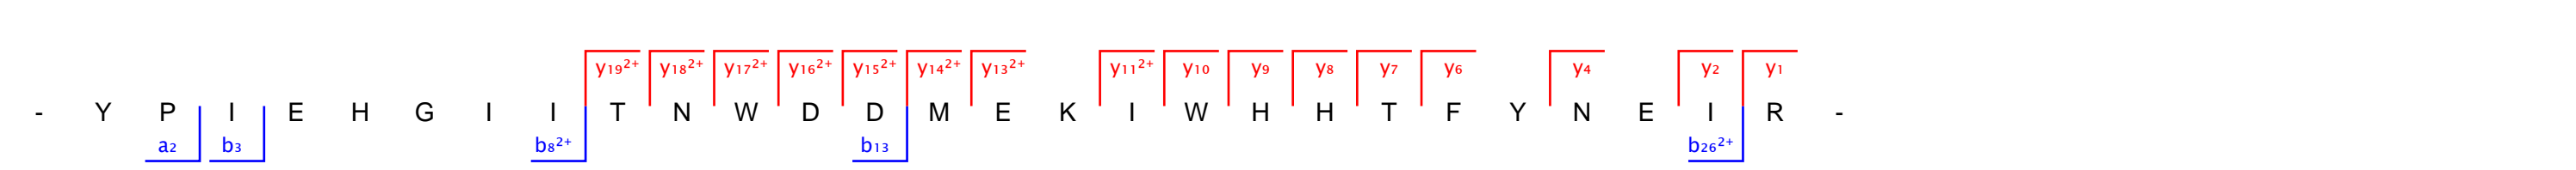

Raw file 2015-01-08\_CL04\_Blastomere-15 Scan 28338 Method ITMS; HCD Score 51.23 m/z 692.53

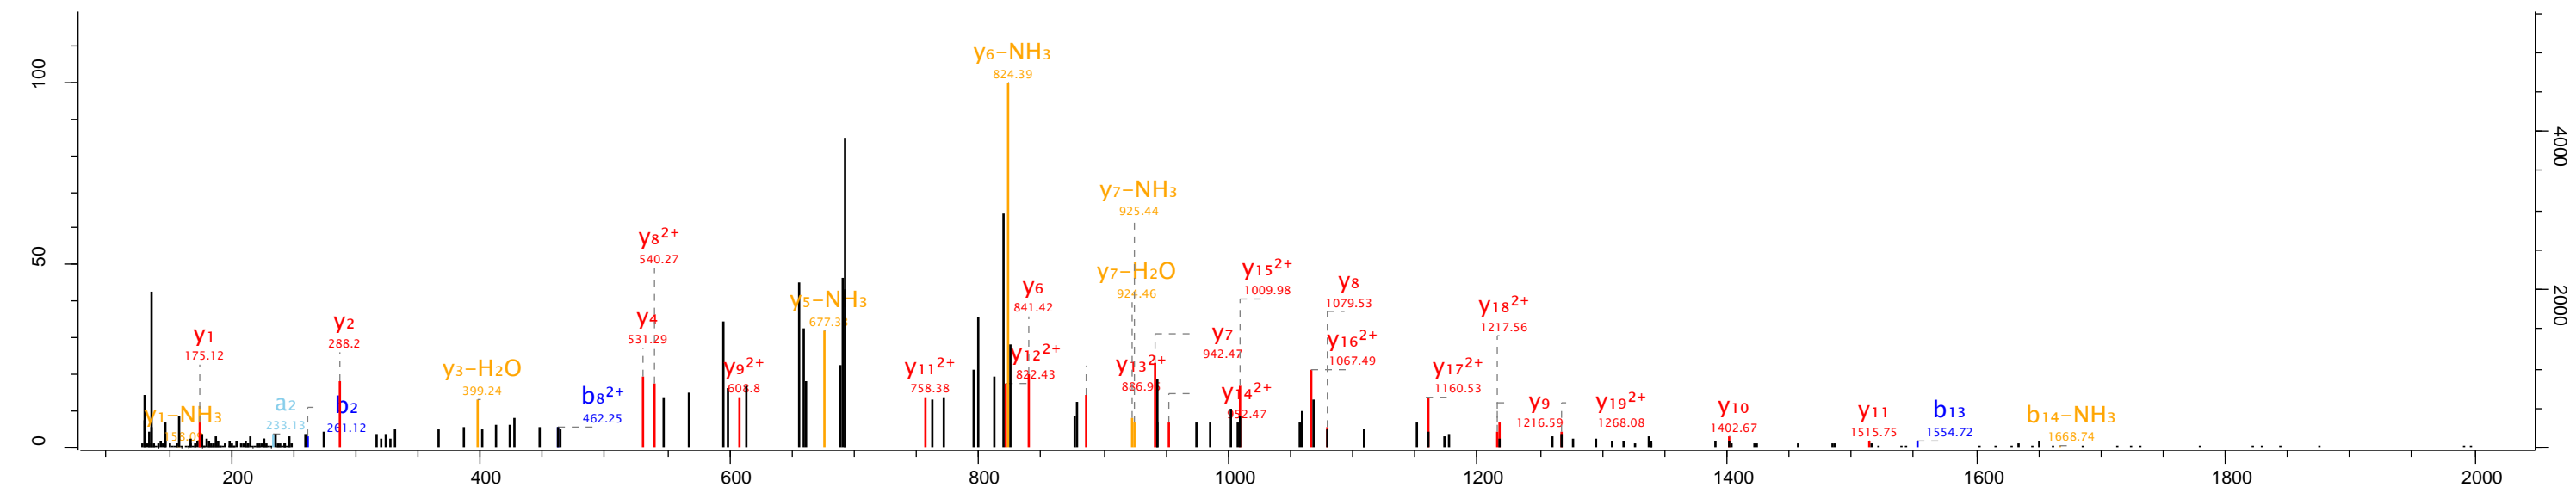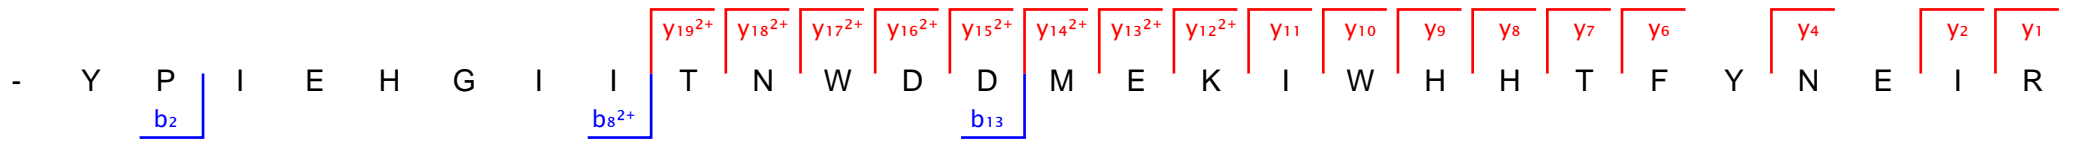

Spectral Annotation for Single-Peptide IDs between Single D11 Cells using Q-OT-LIT

Raw file  
 2015-01-08\_CL04\_Blastomere-15  
 Scan 28360 Method ITMS; HCD Score 57.69 m/z 865.41

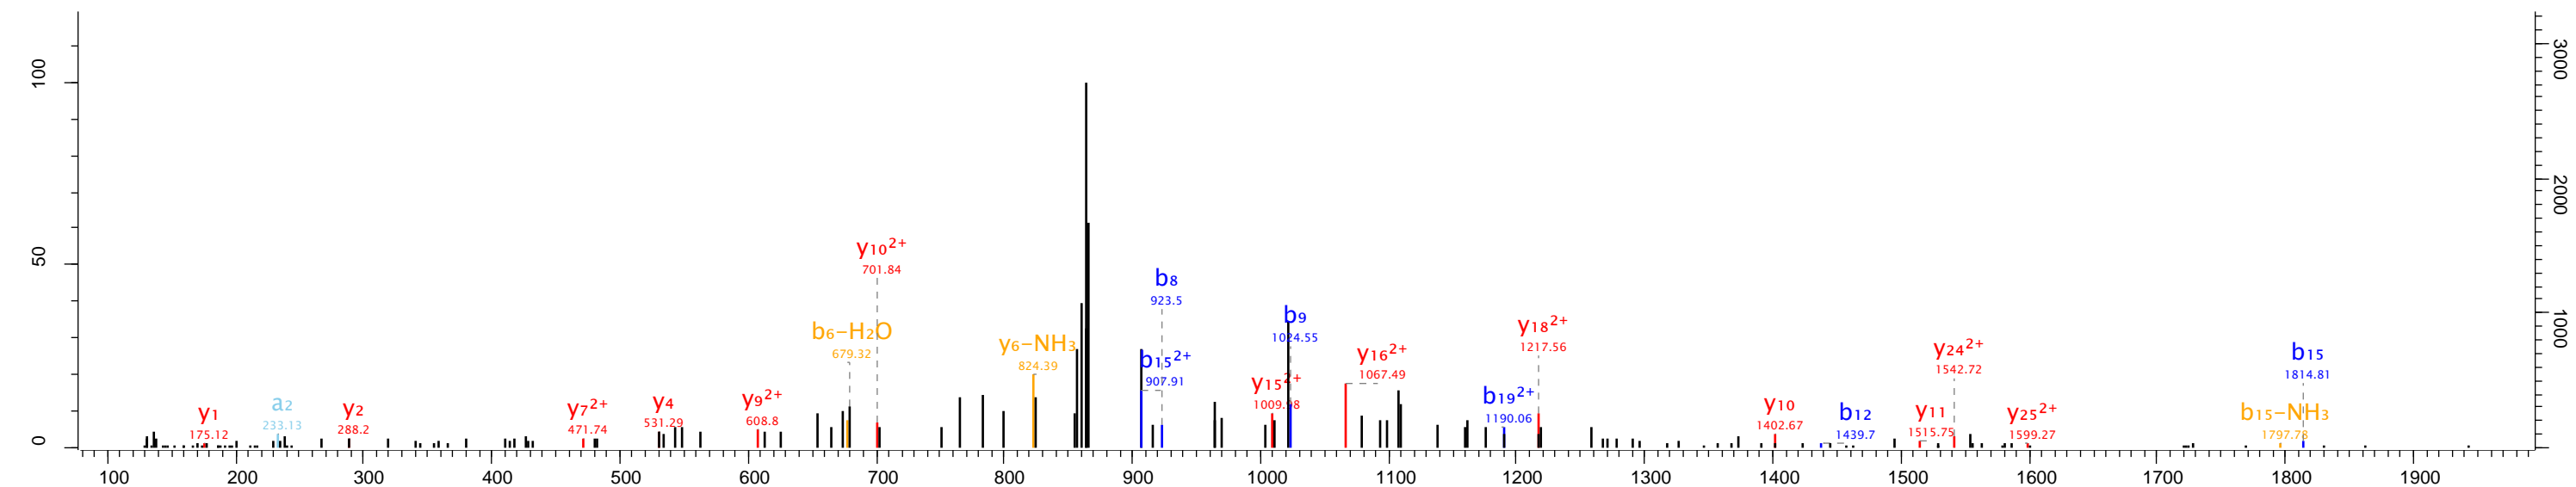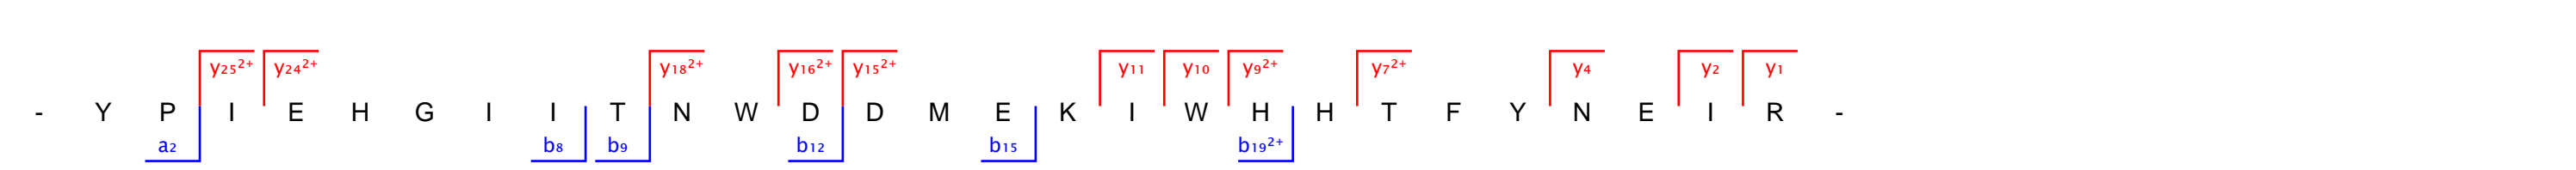

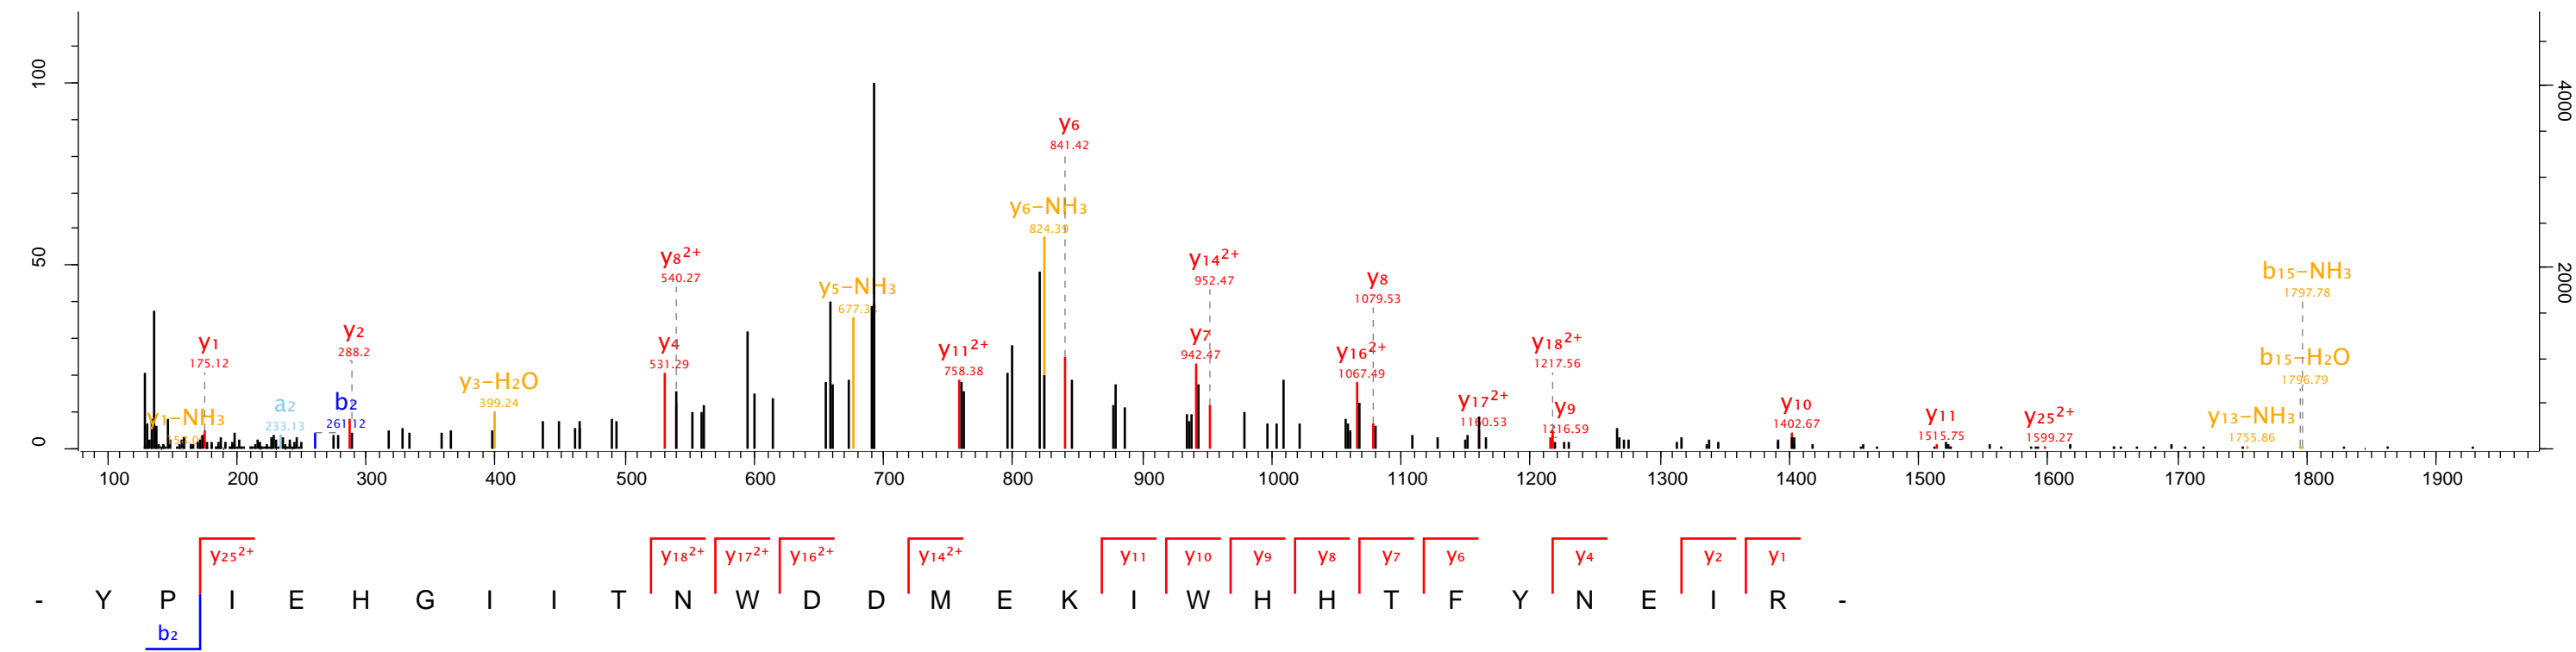



Raw file 2015-01-08\_CL04\_Blastomere-15 Scan 28490 Method ITMS; HCD Score 106.62 m/z 572.8

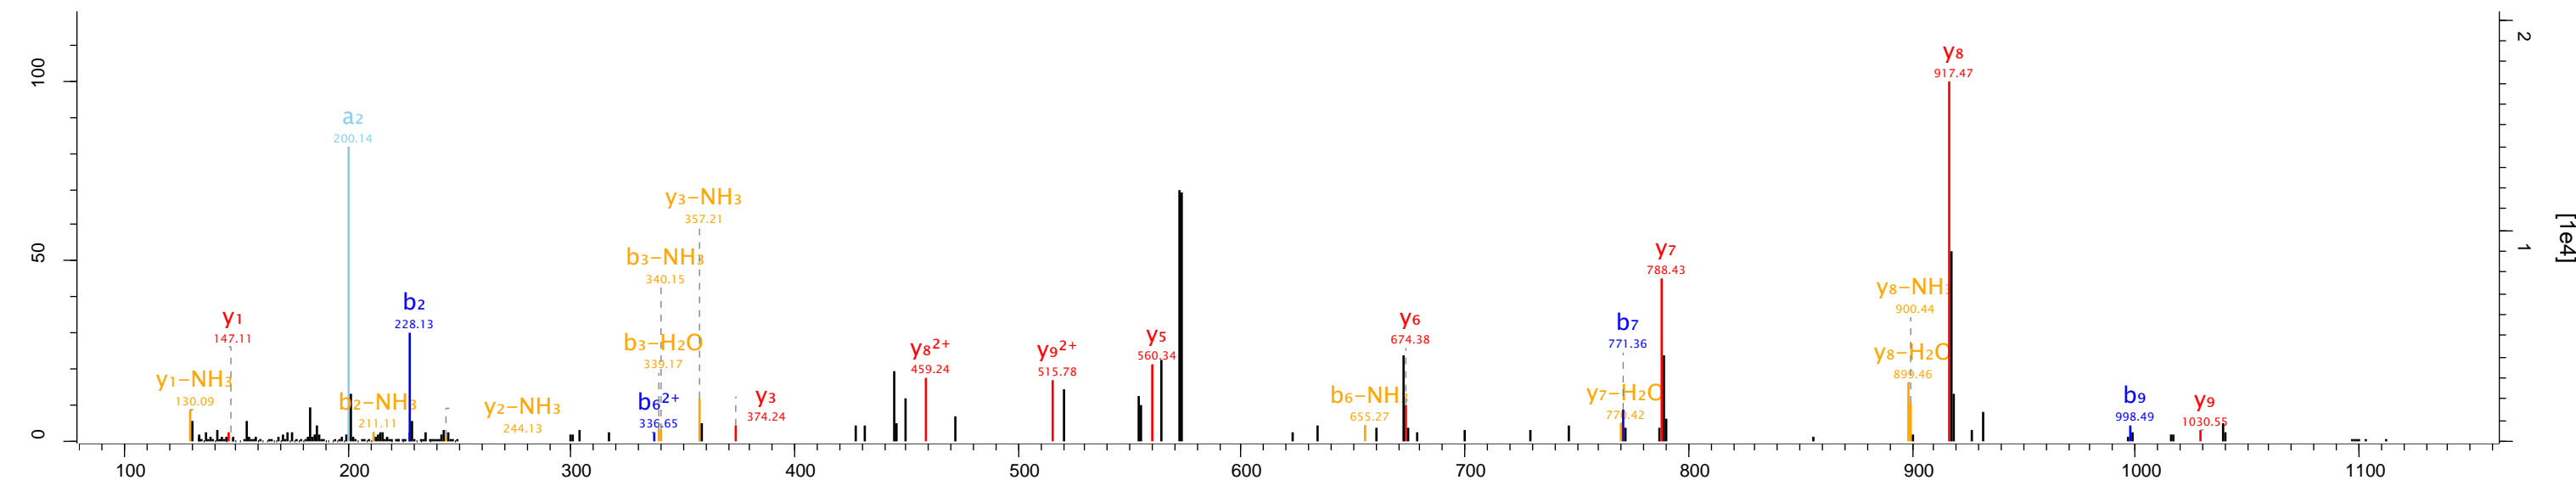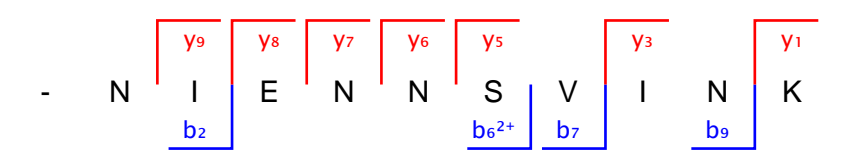

Spectral Annotation for Single-Peptide IDs between Single D11 Cells using Q-OT-LIT

Raw file 2015-01-08\_CL04\_Blastomere-15 Scan 28508 Method ITMS; HCD Score 92.24 m/z 382.2

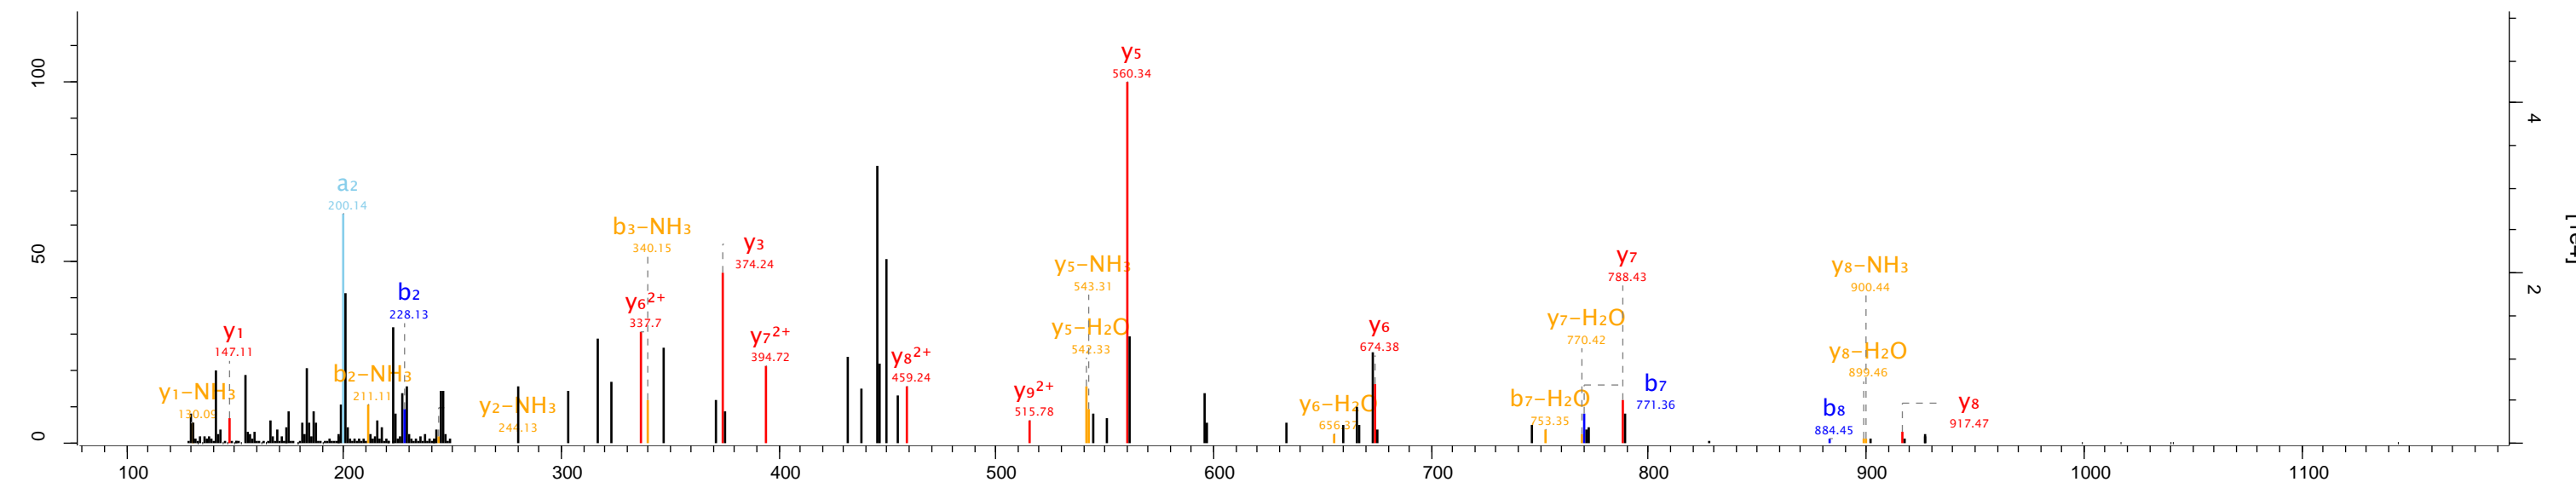

Spectral Annotation for Single-Peptide IDs between Single D11 Cells using Q-OT-LIT

Raw file 2015-01-08\_CL04\_Blastomere-15 Scan 28515 Method ITMS; HCD Score 108.7 m/z 572.8

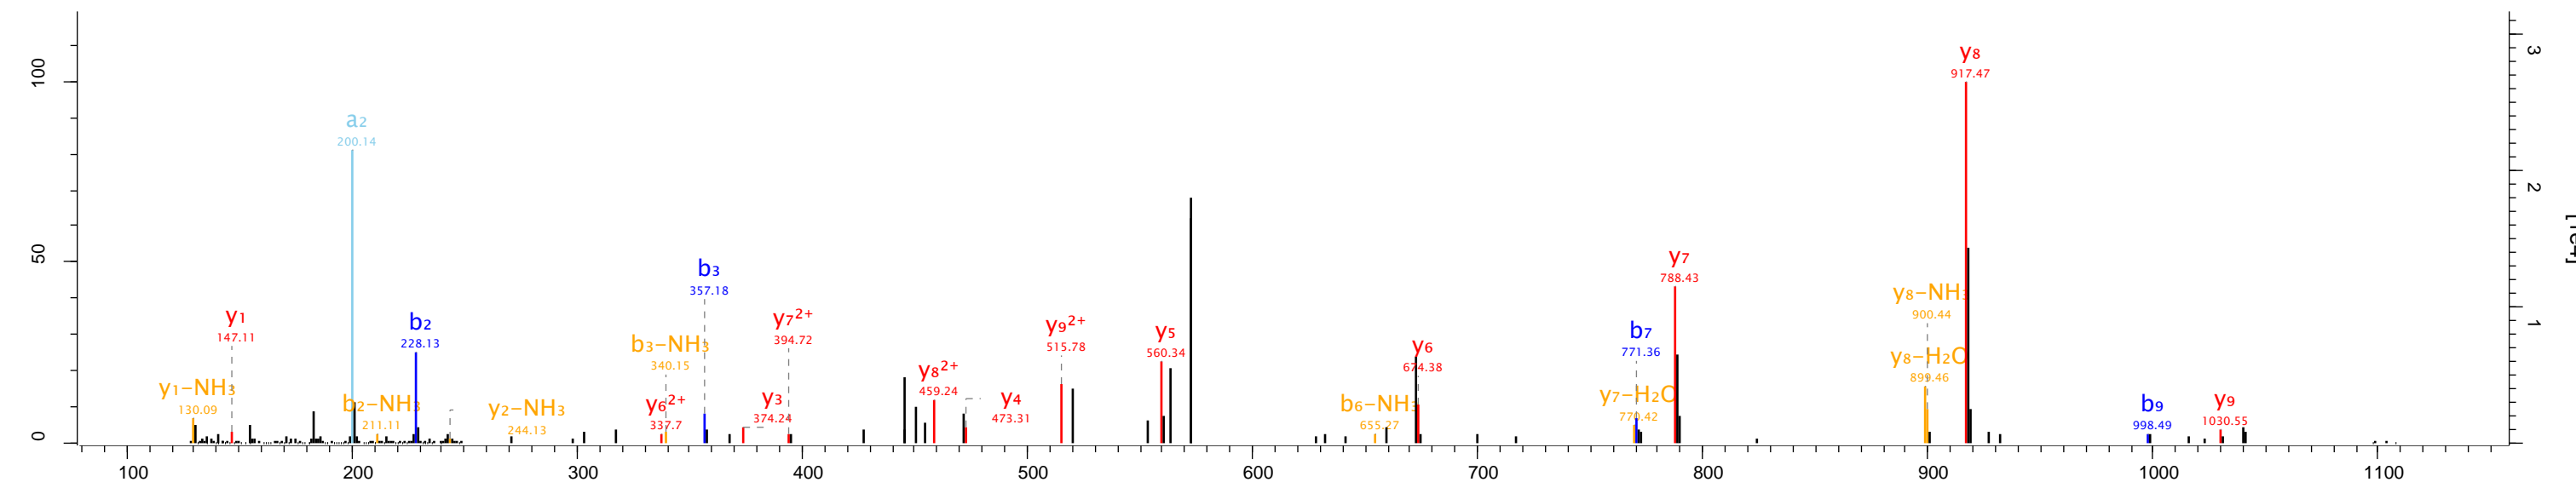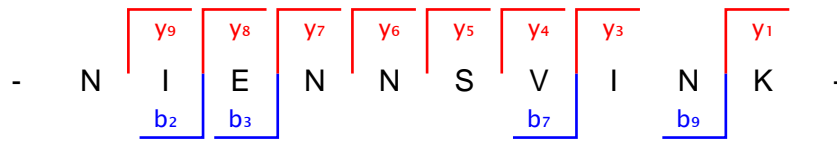

Spectral Annotation for Single-Peptide IDs between Single D11 Cells using Q-OT-LIT

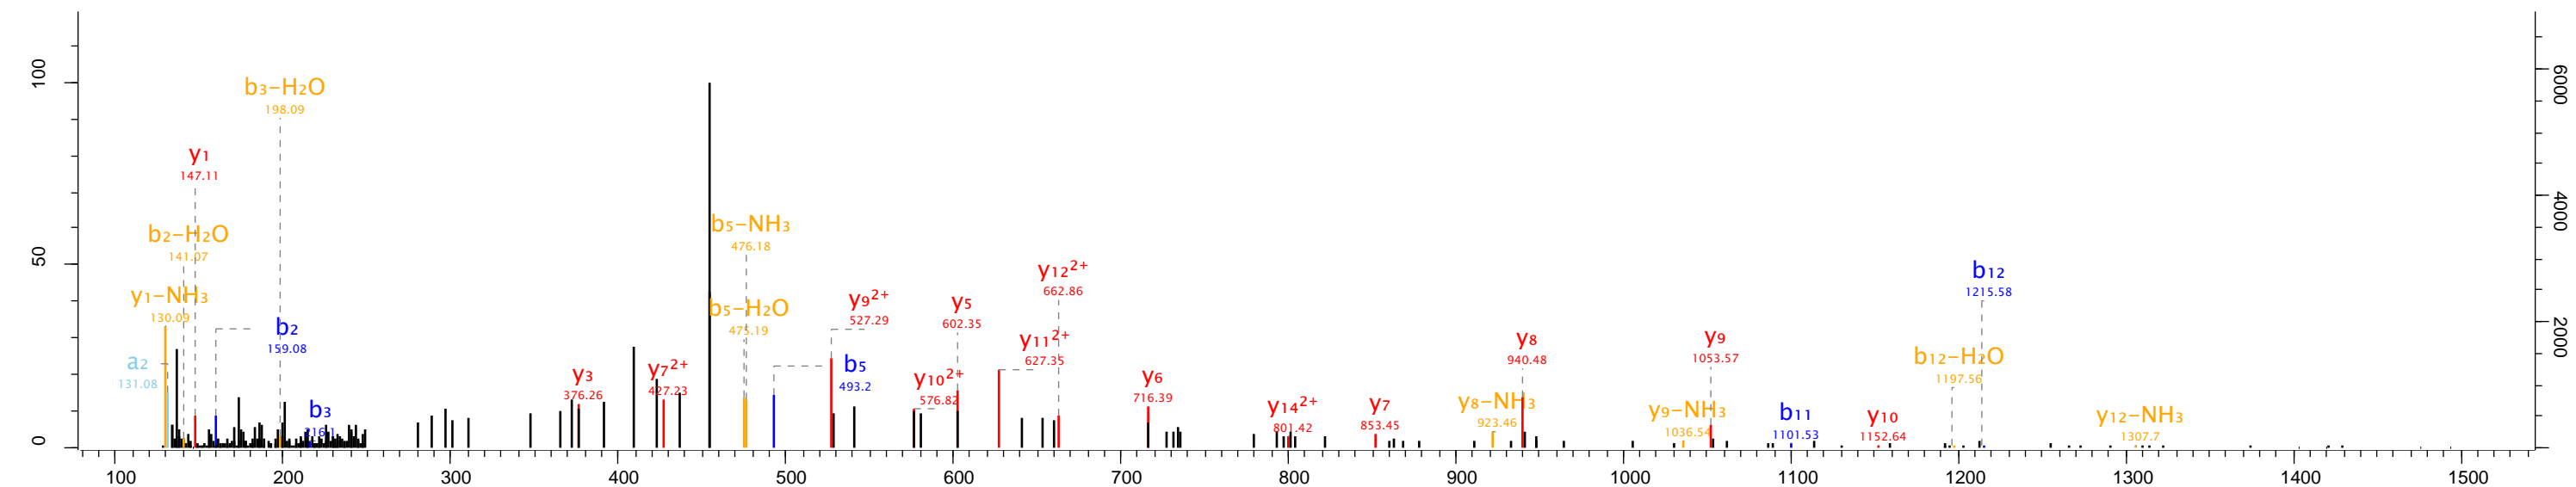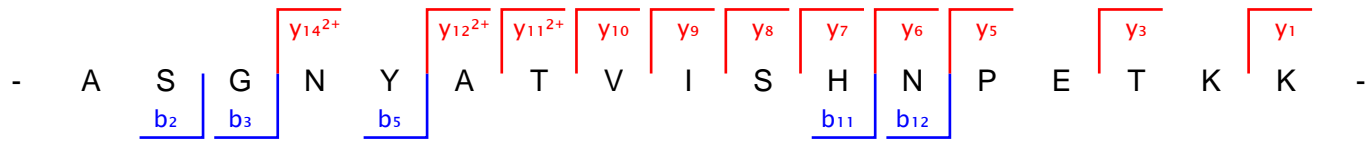

Spectral Annotation for Single-Peptide IDs between Single D11 Cells using Q-OT-LIT

Raw file 2015-01-08\_CL04\_Blastomere-15 Scan 28626 Method ITMS; HCD Score 39.34 m/z 454.98

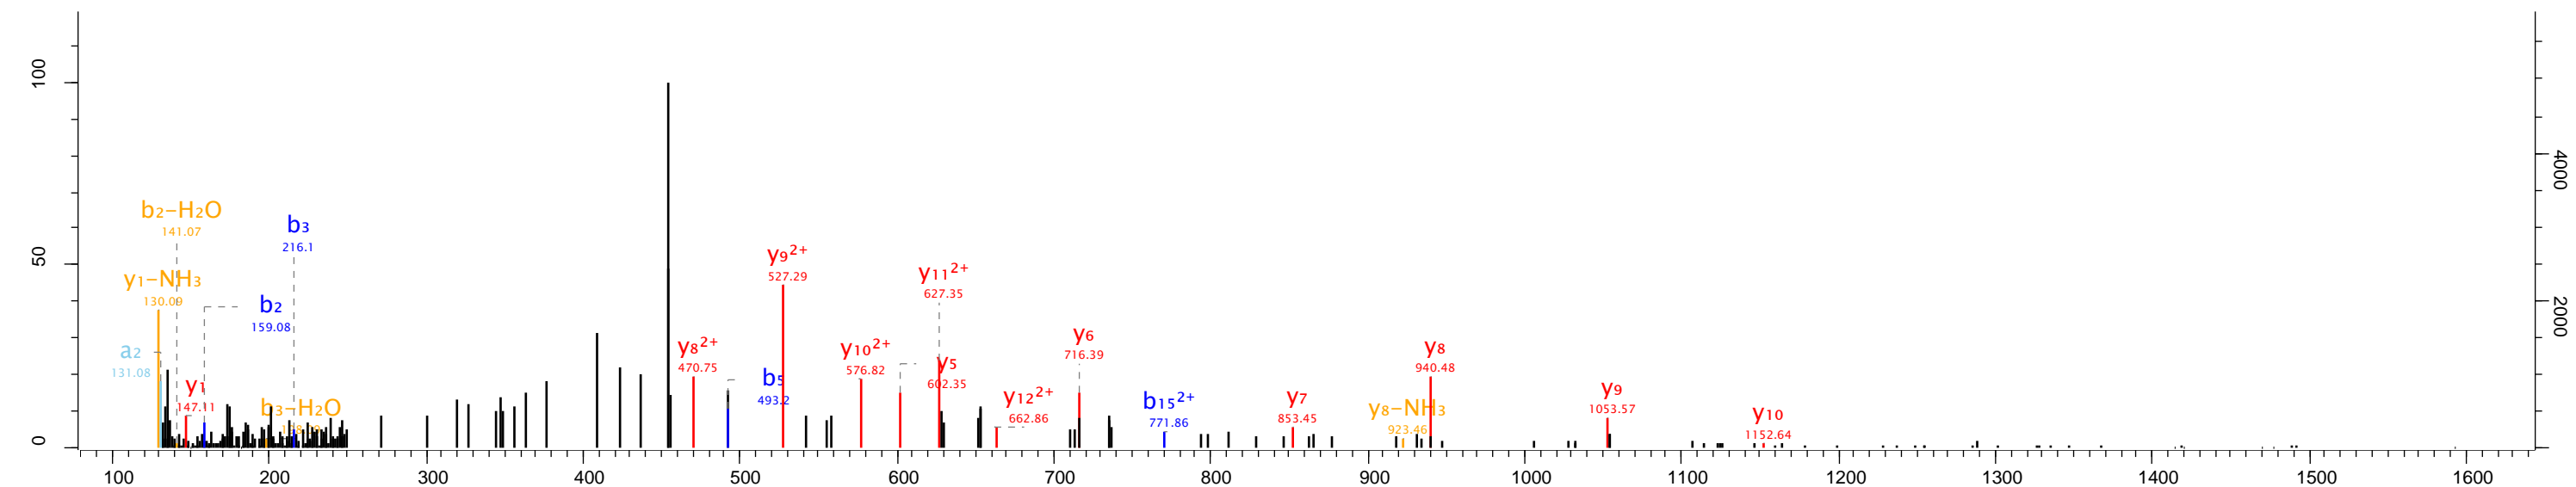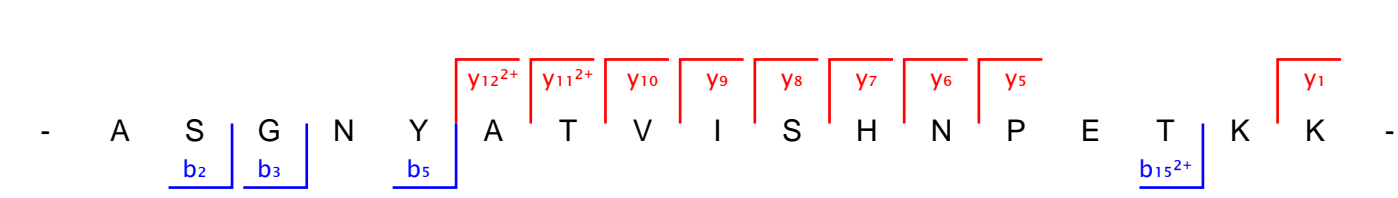

Spectral Annotation for Single-Peptide IDs between Single D11 Cells using Q-OT-LIT

Raw file 2015-01-08\_CL04\_Blastomere-15 Scan 28668 Method ITMS; HCD Score 22.24 m/z 692.53

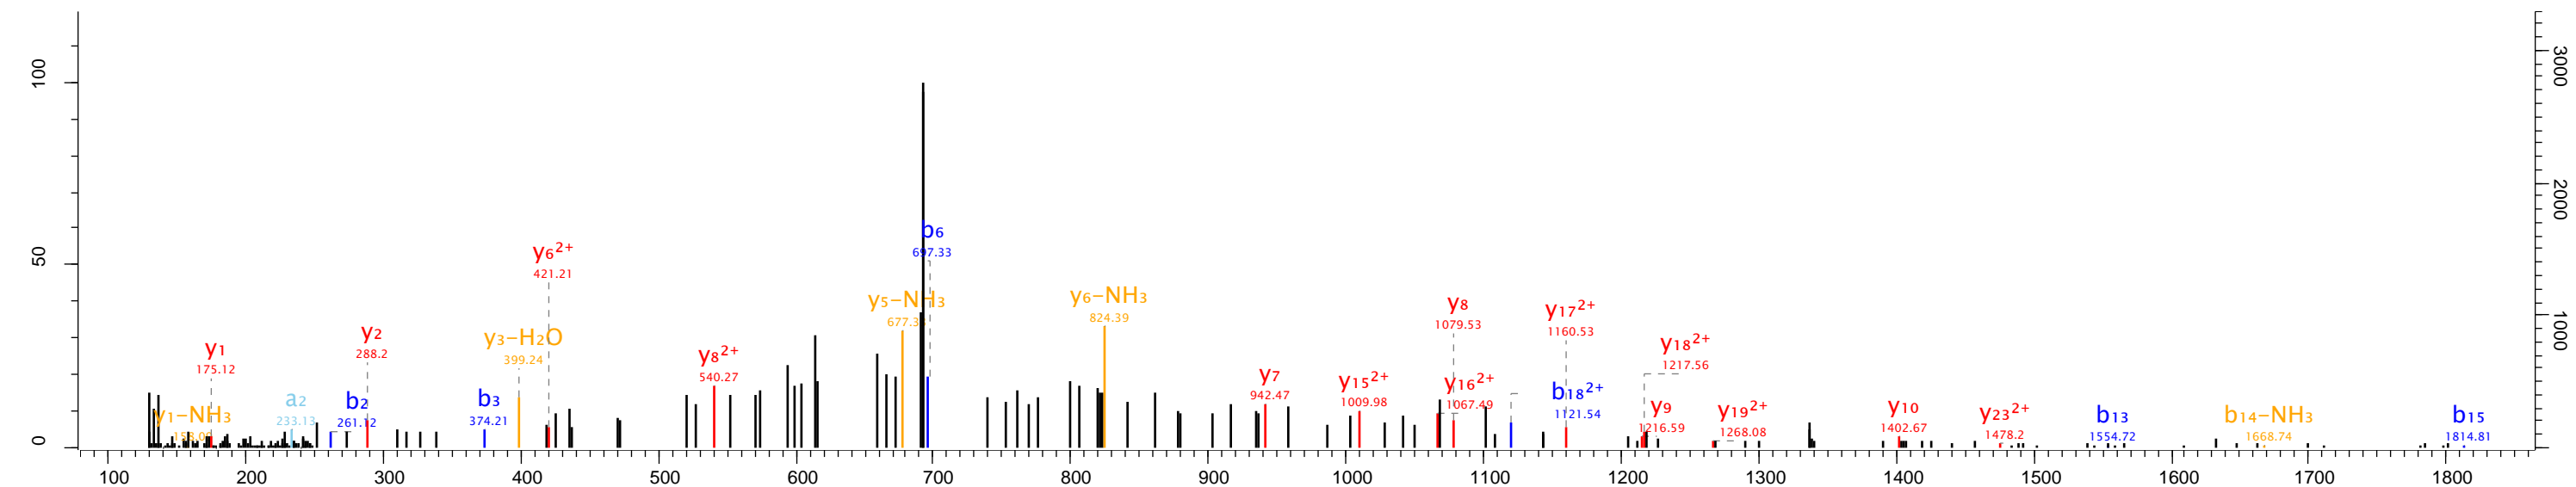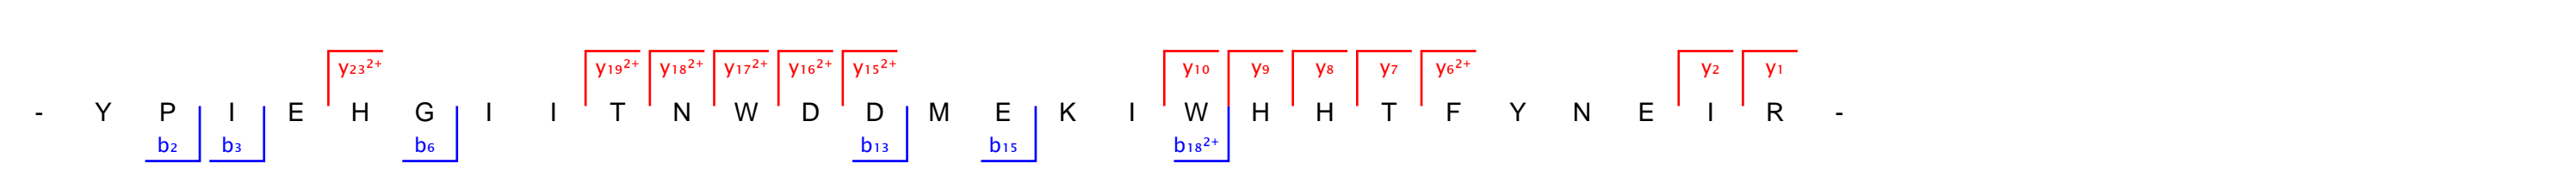

Raw file 2015-01-08\_CL04\_Blastomere-15 Scan 28673 Method ITMS; HCD Score 61.59 m/z 400.24

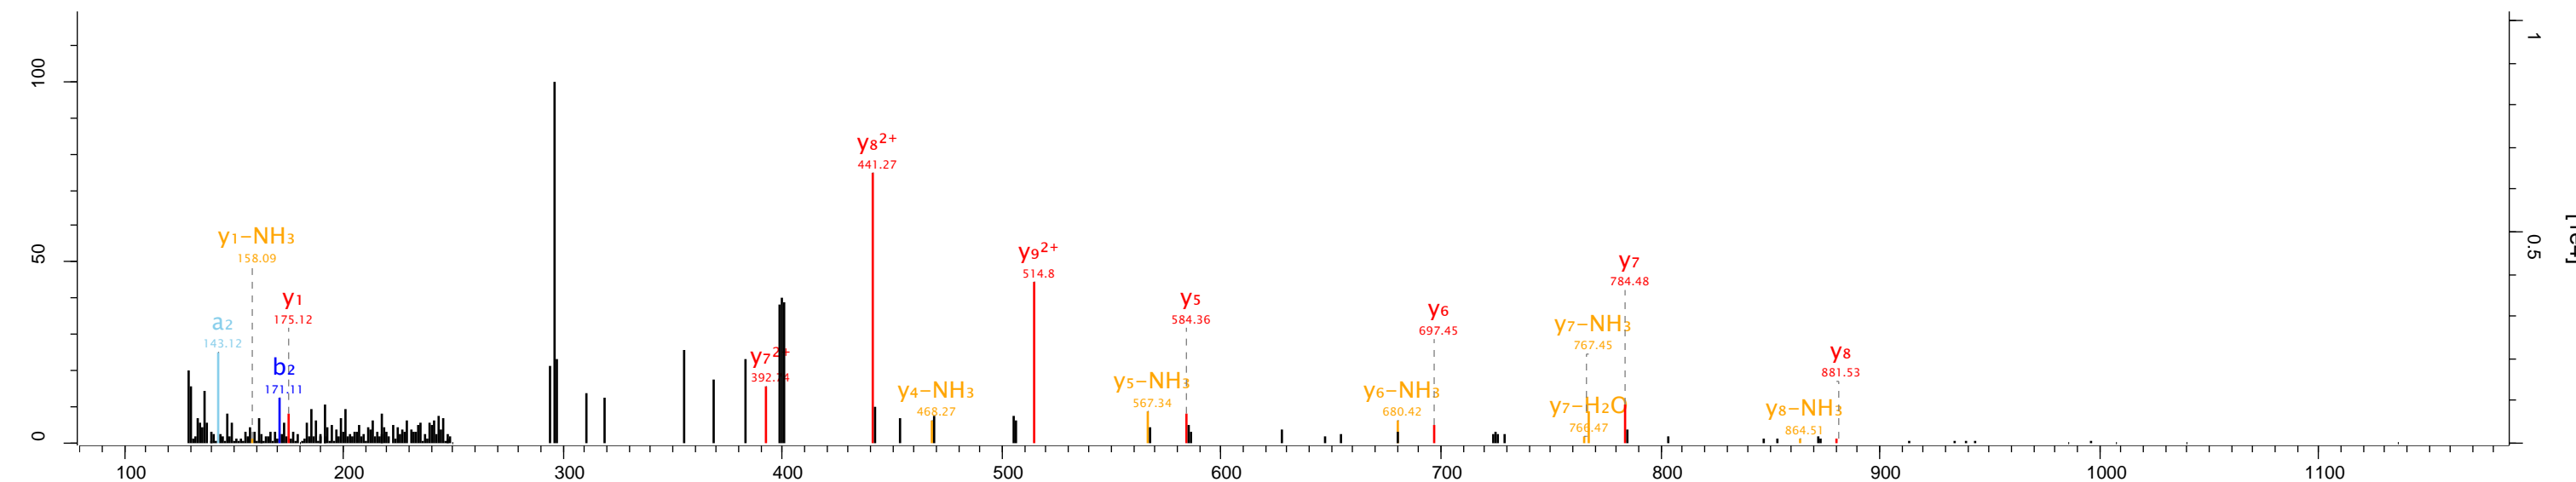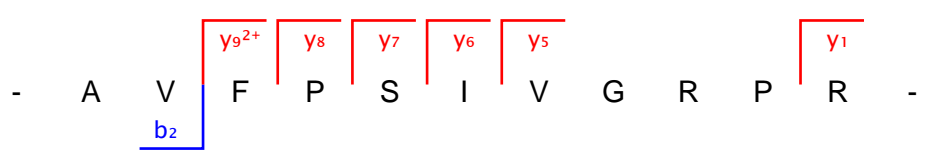

Spectral Annotation for Single-Peptide IDs between Single D11 Cells using Q-OT-LIT

Raw file 2015-01-08\_CL04\_Blastomere-15 Scan 28682 Method ITMS; HCD Score 65.72 m/z 400.24

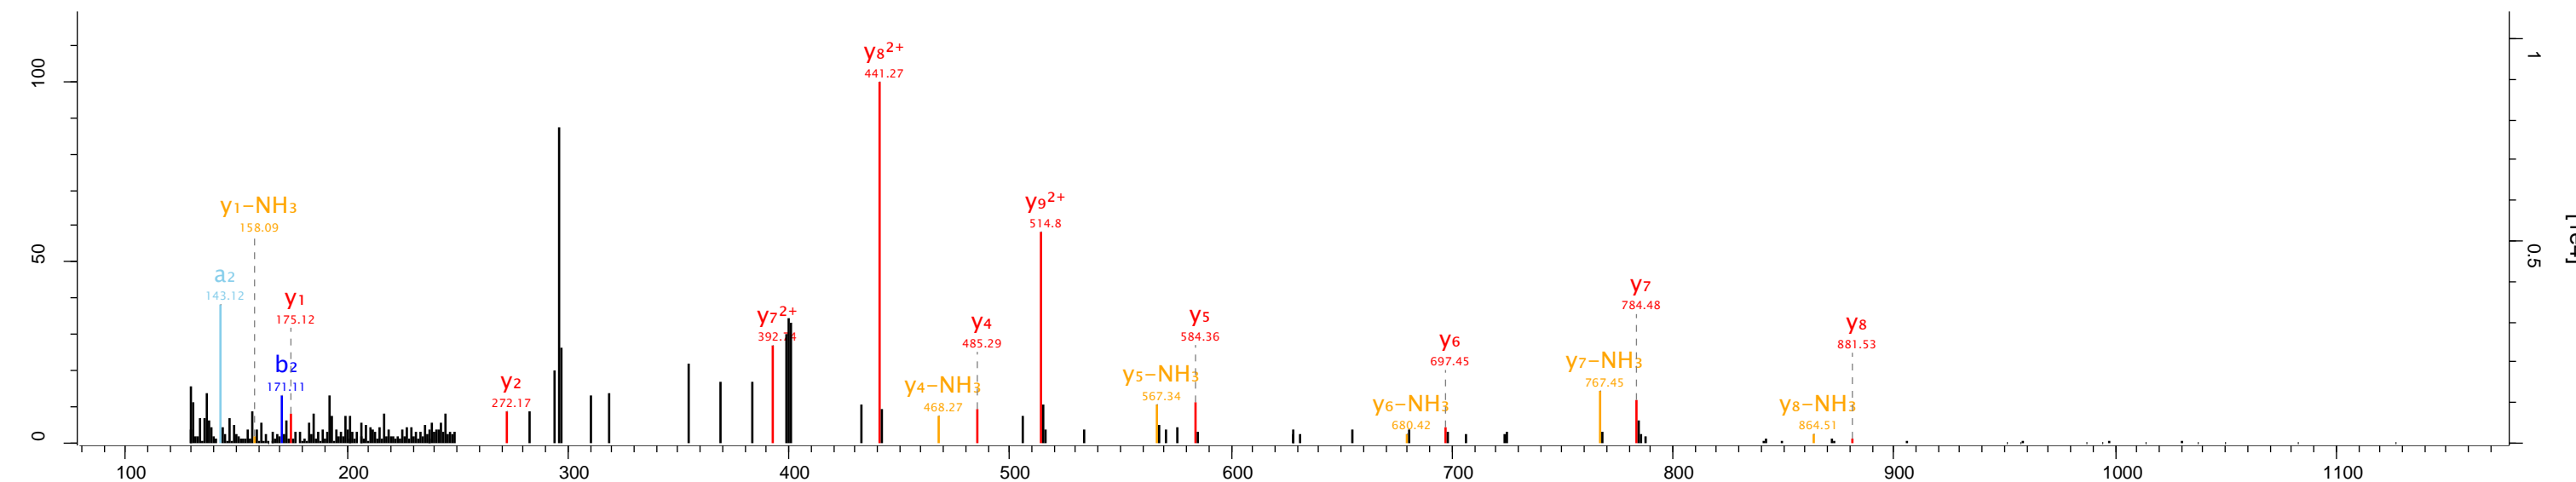

Spectral Annotation for Single-Peptide IDs between Single D11 Cells using Q-OT-LIT



Raw file 2015-01-08\_CL04\_Blastomere-15 Scan 28708 Method ITMS; HCD Score 94.31 m/z 400.57

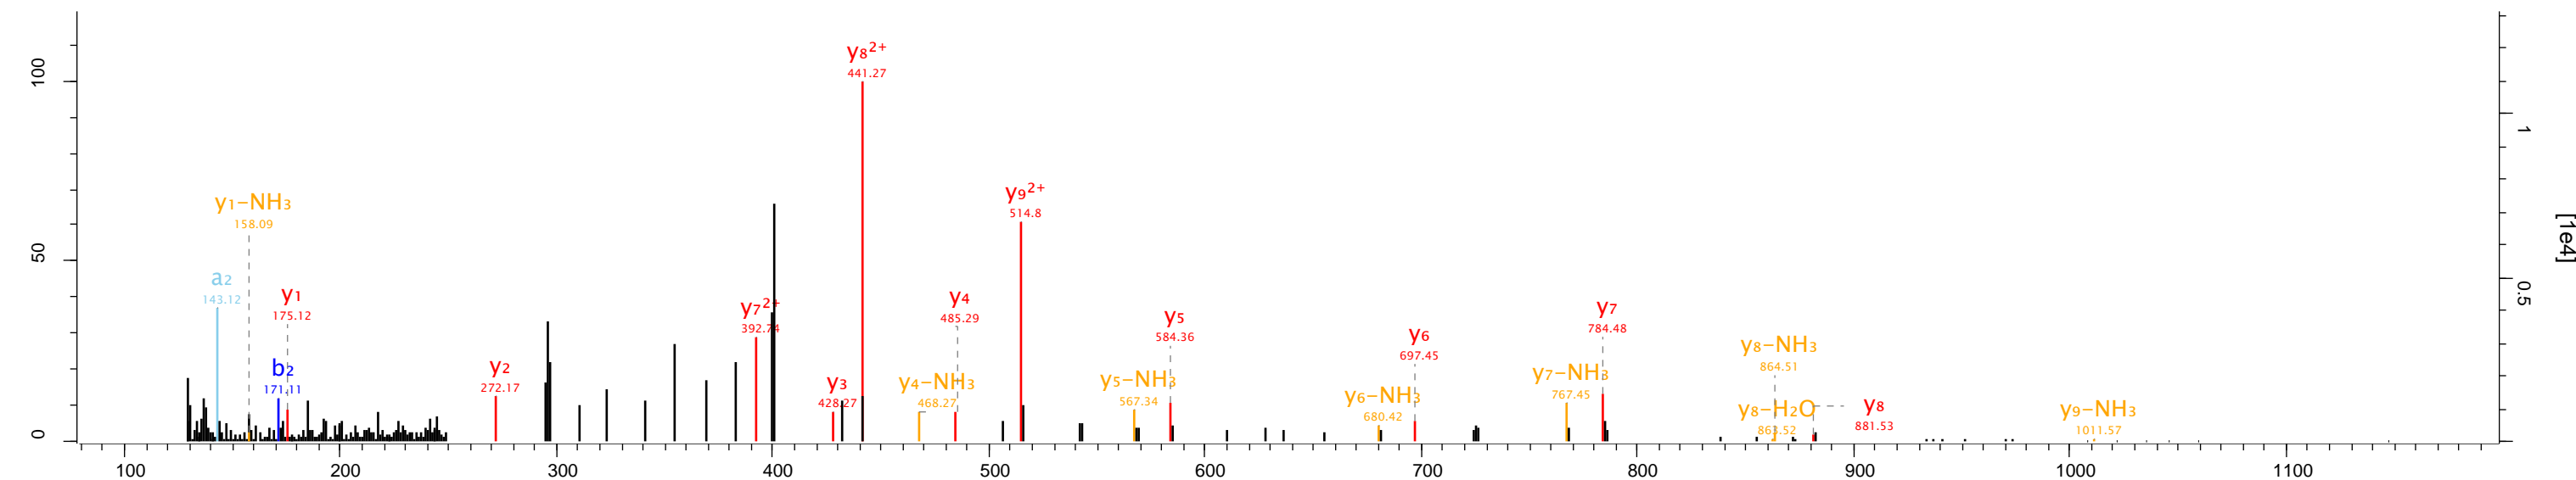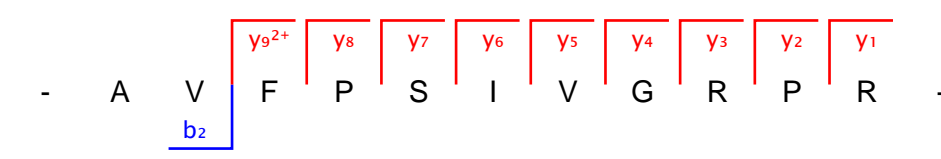

Spectral Annotation for Single-Peptide IDs between Single D11 Cells using Q-OT-LIT

Raw file 2015-01-08\_CL04\_Blastomere-15 Scan 28729 Method ITMS; HCD Score 76.23 m/z 400.24

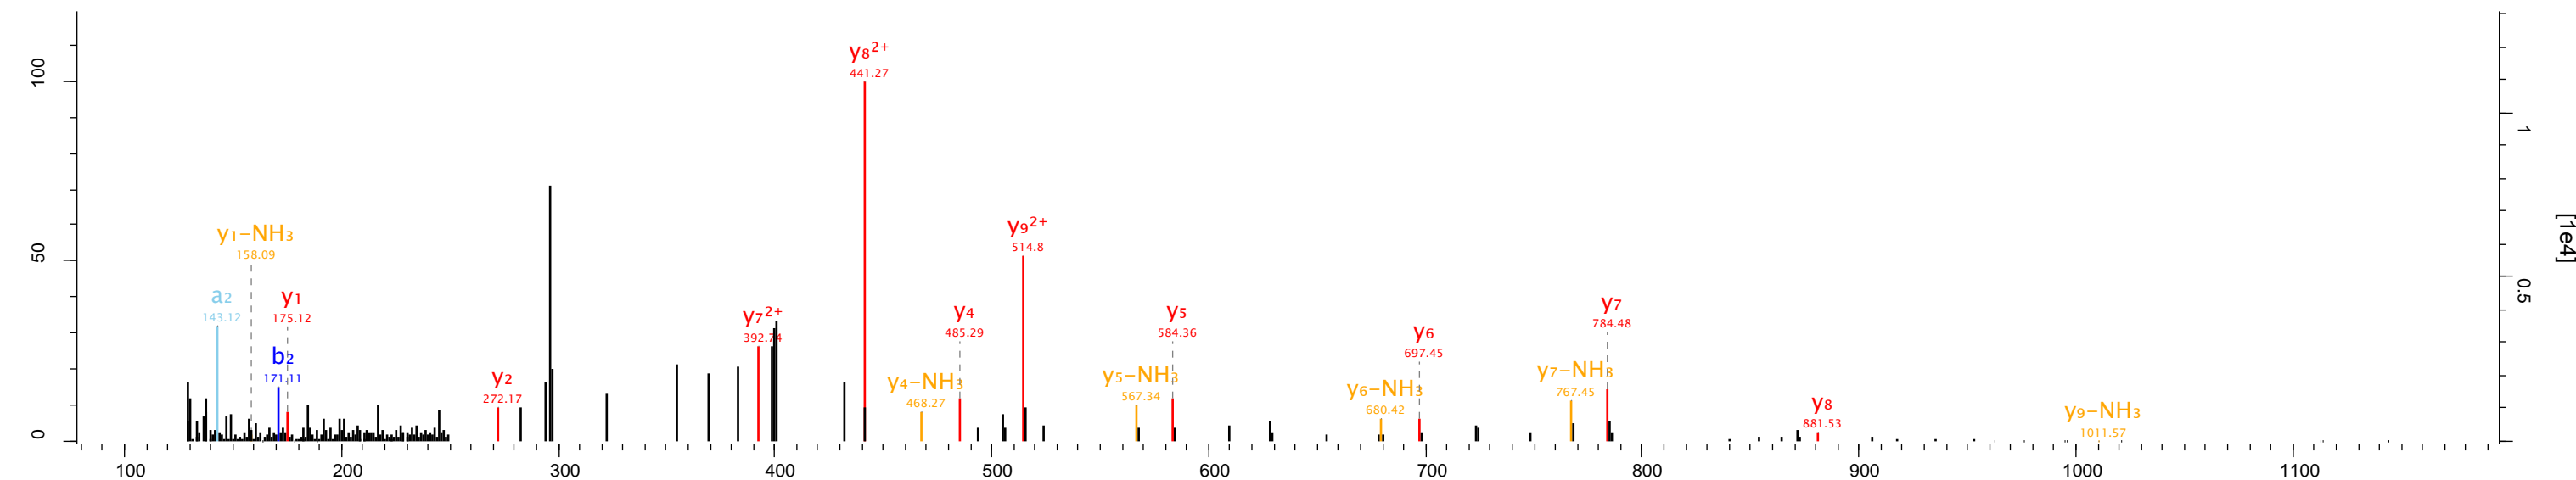

Spectral Annotation for Single-Peptide IDs between Single D11 Cells using Q-OT-LIT

Raw file 2015-01-08\_CL04\_Blastomere-15 Scan 28741 Method ITMS; HCD Score 109.66 m/z 400.24

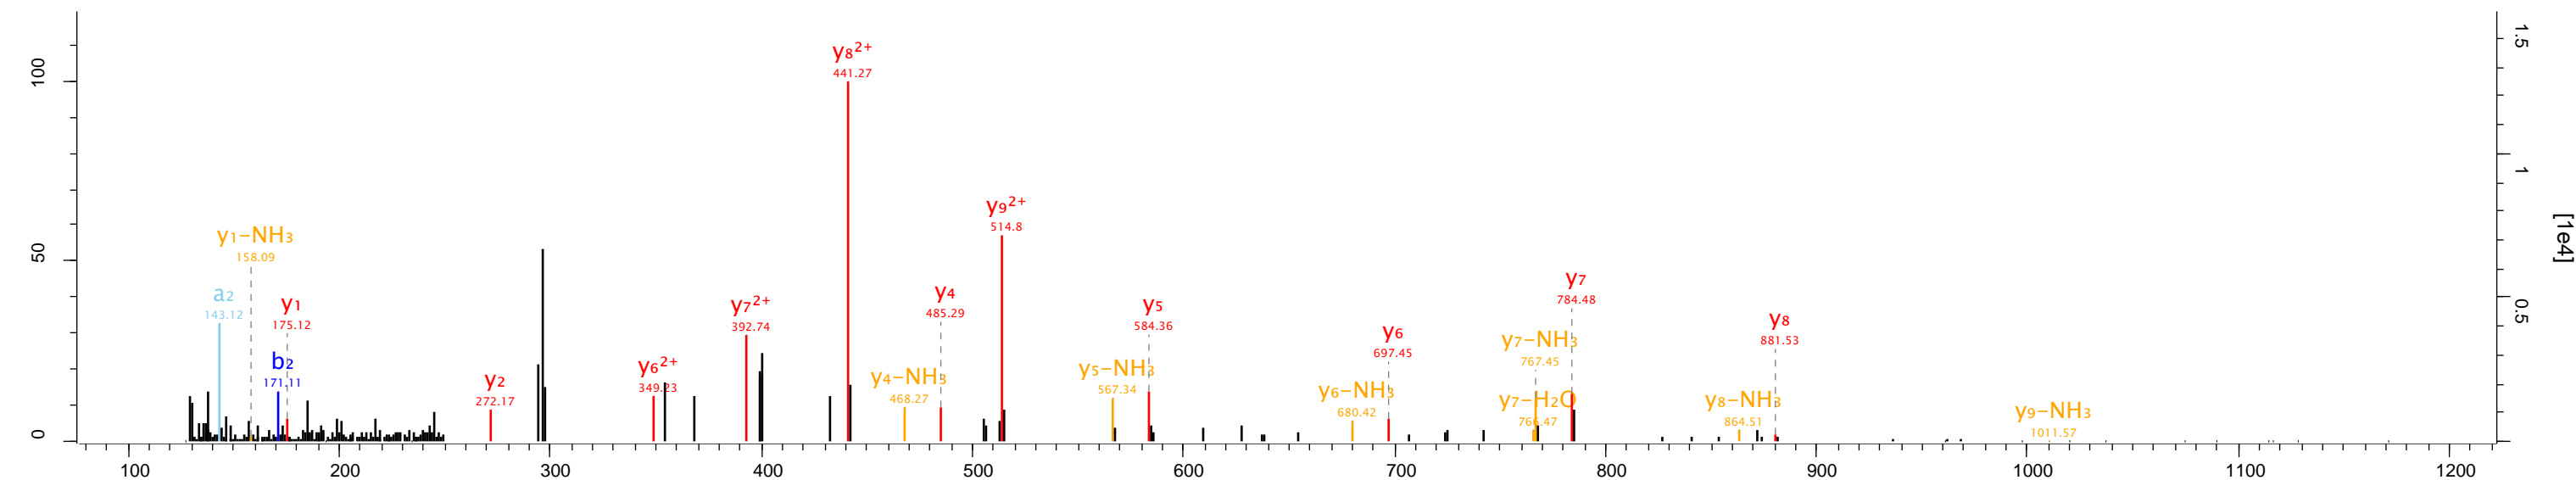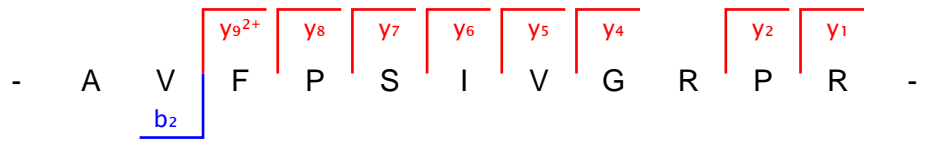

Spectral Annotation for Single-Peptide IDs between Single D11 Cells using Q-OT-LIT

Raw file 2015-01-08\_CL04\_Blastomere-15 Scan 28832 Method ITMS; HCD Score 102.95 m/z 586.29

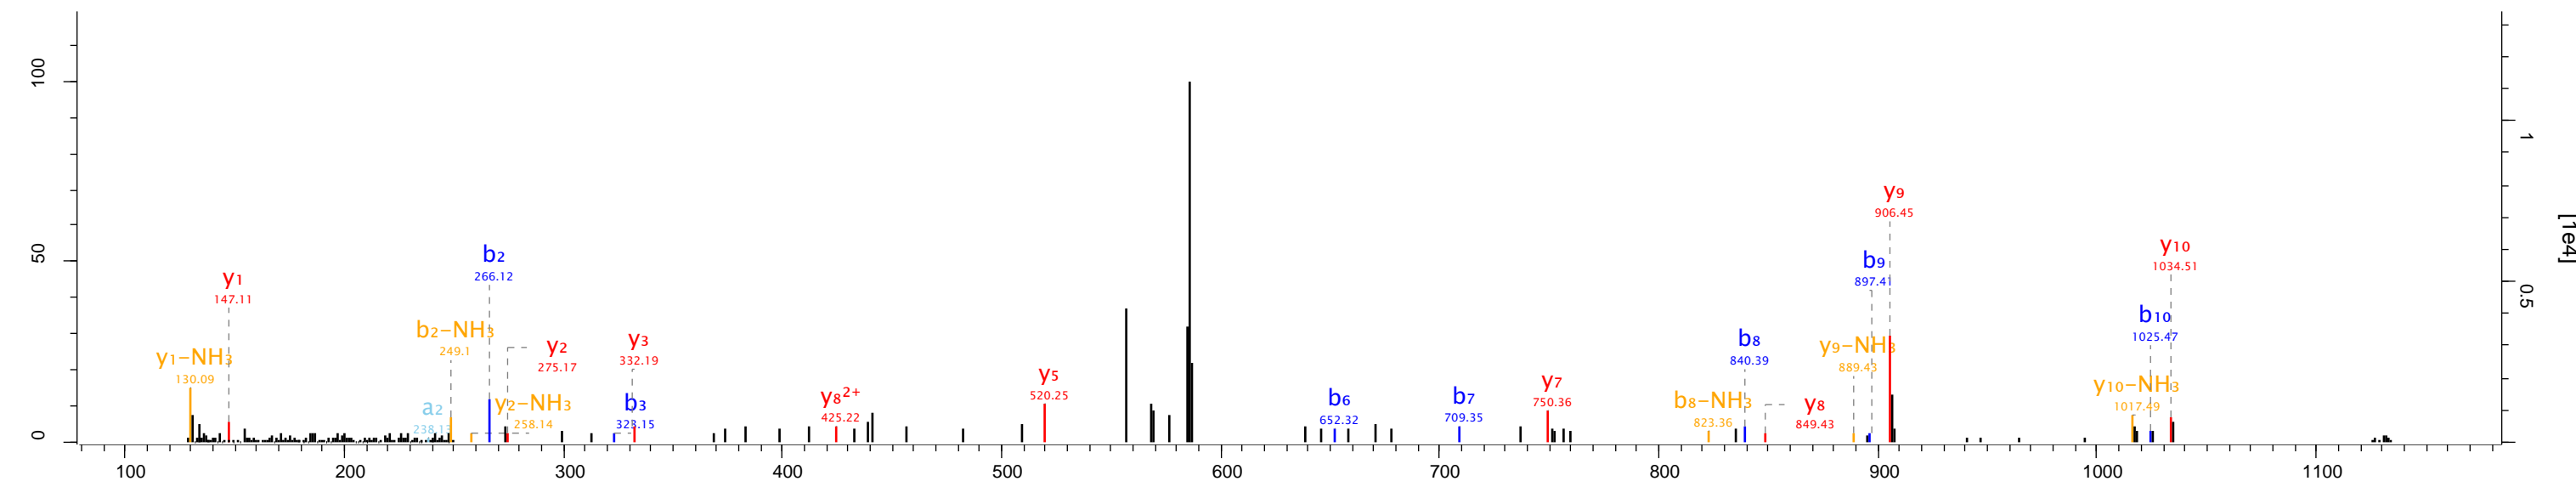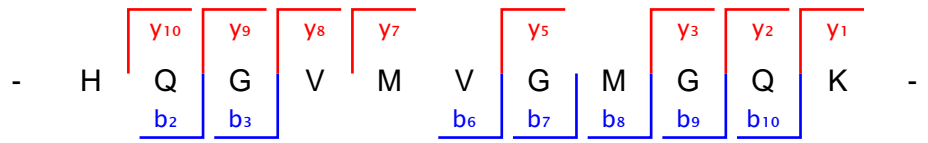

Spectral Annotation for Single-Peptide IDs between Single D11 Cells using Q-OT-LIT

Raw file 2015-01-08\_CL04\_Blastomere-15 Scan 28868 Method ITMS; HCD Score 129.88 m/z 586.29

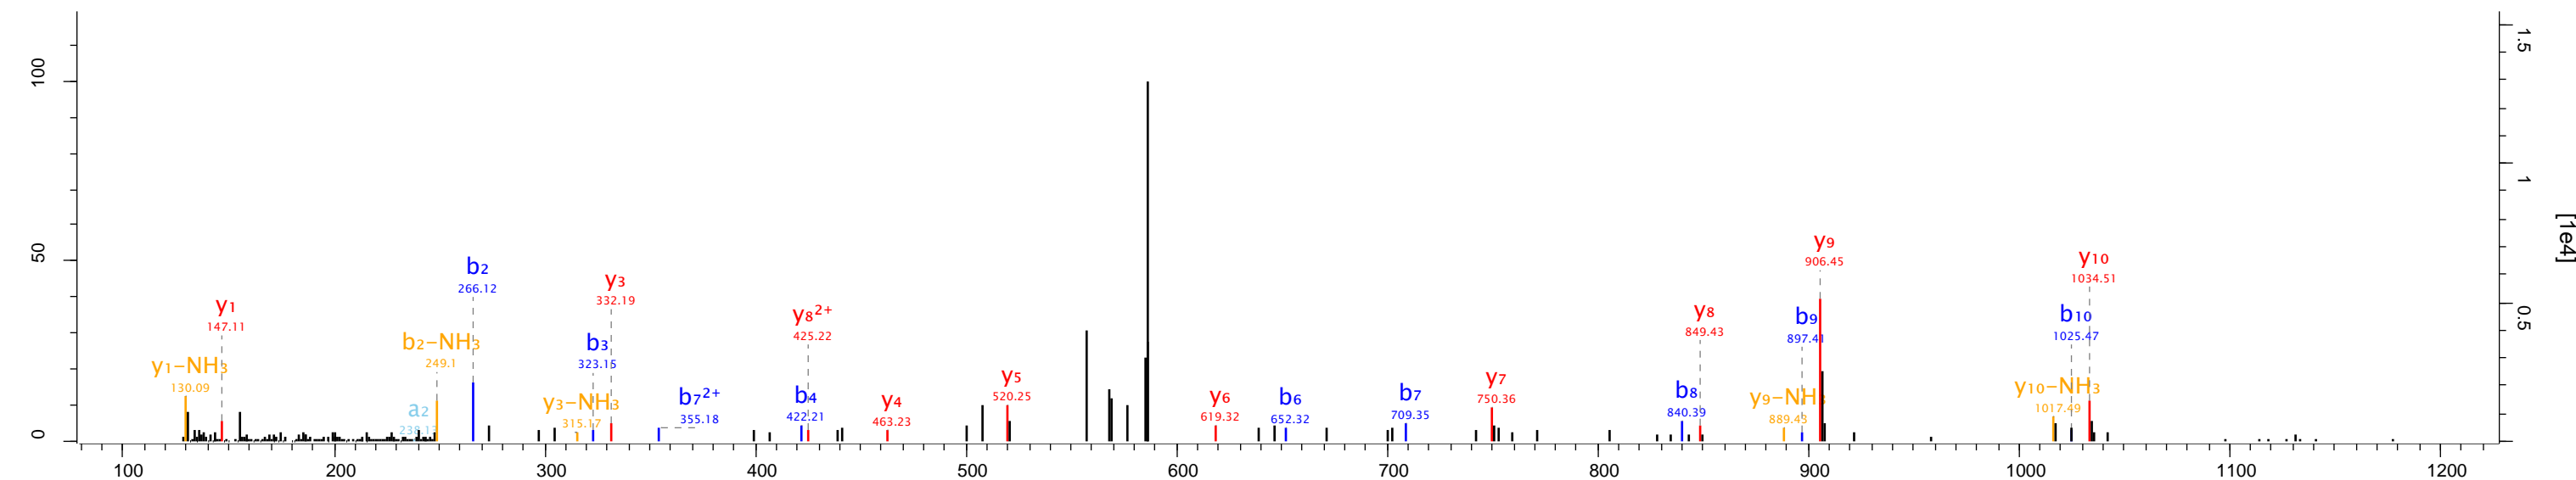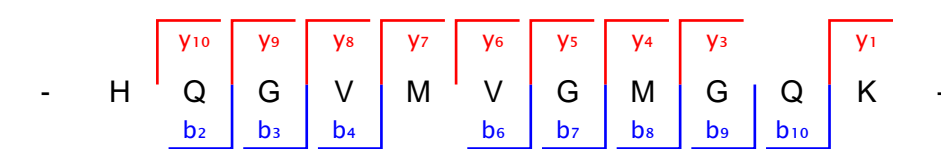

Spectral Annotation for Single-Peptide IDs between Single D11 Cells using Q-OT-LIT

Raw file 2015-01-08\_CL04\_Blastomere-15 Scan 28872 Method ITMS; HCD Score 64.1 m/z 391.19

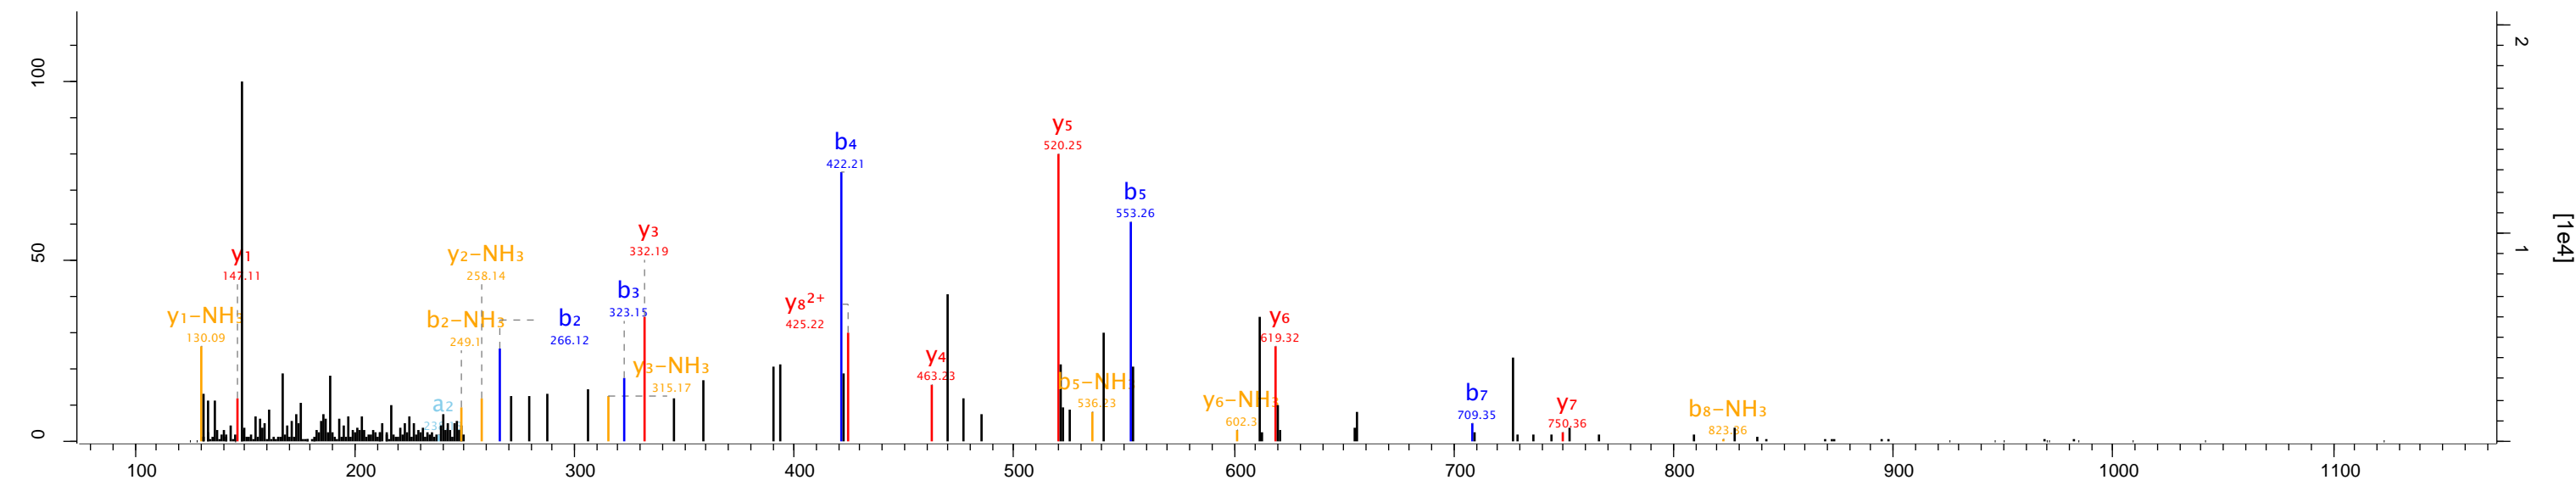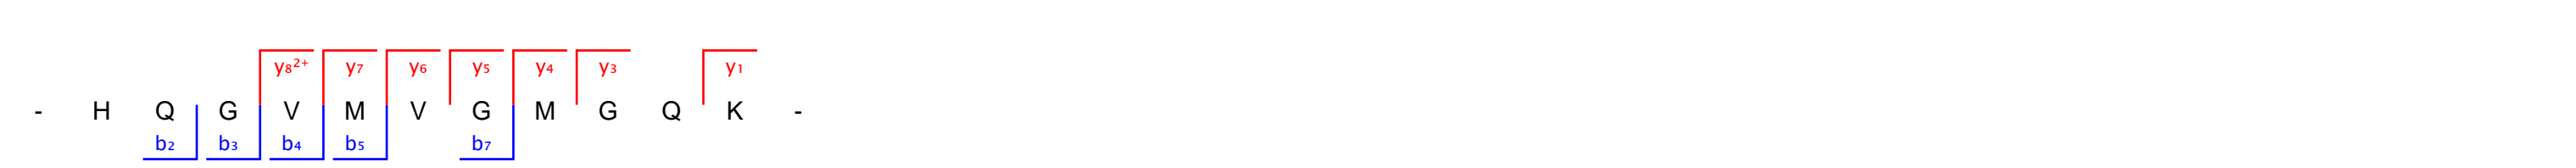

Raw file 2015-01-08\_CL04\_Blastomere-15 Scan 28882 Method ITMS; HCD Score 115.91 m/z 586.29

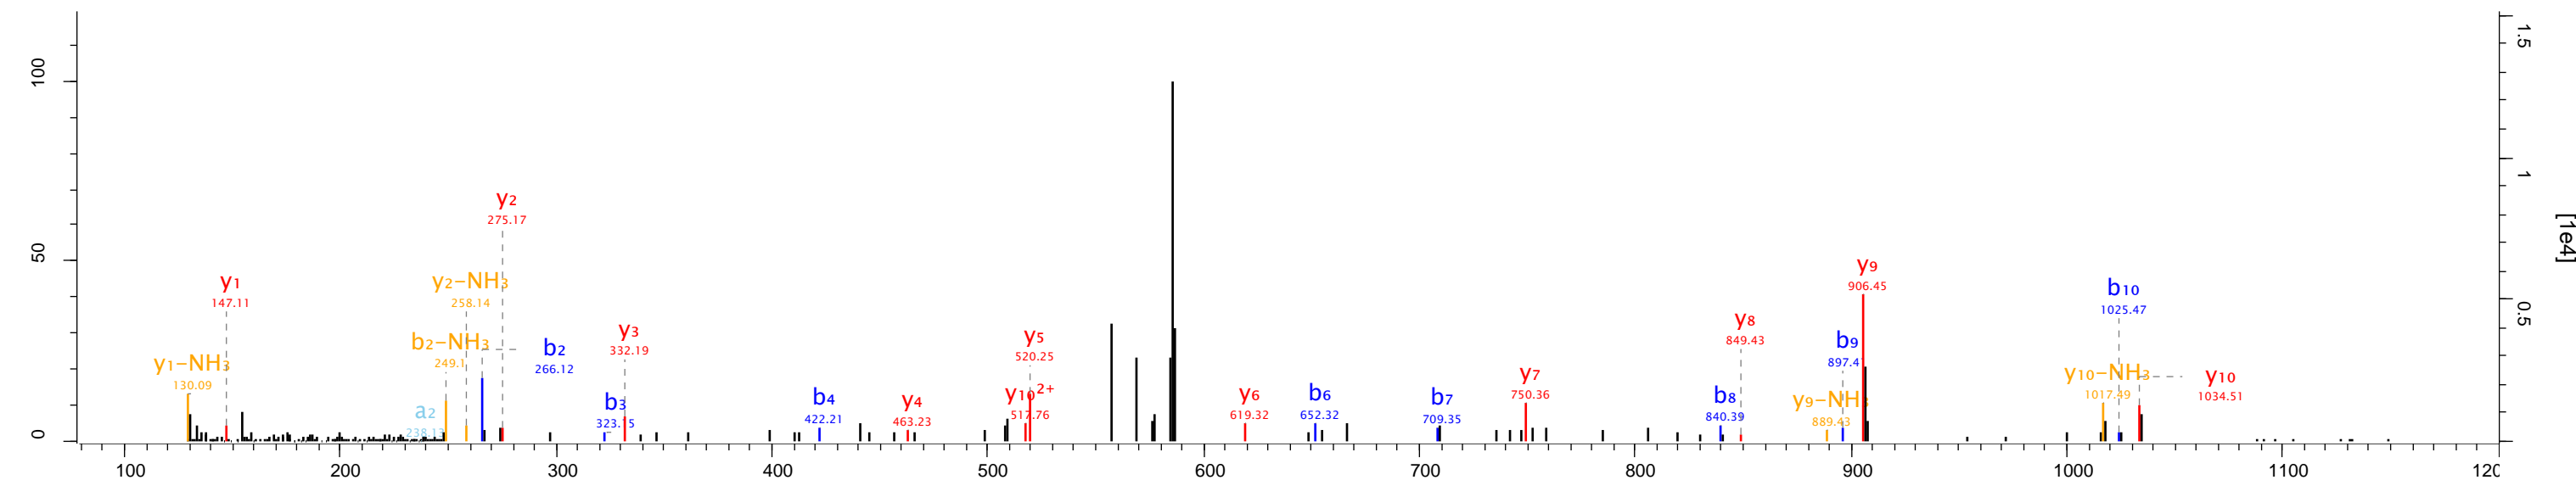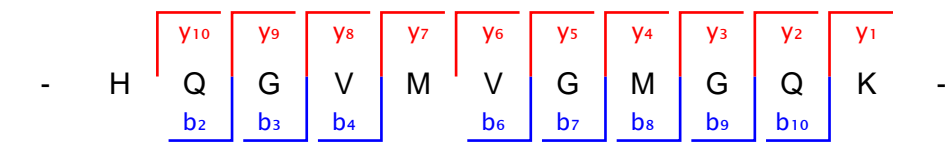

Raw file 2015-01-08\_CL04\_Blastomere-15 Scan 28884 Method ITMS; HCD Score 61.96 m/z 391.19

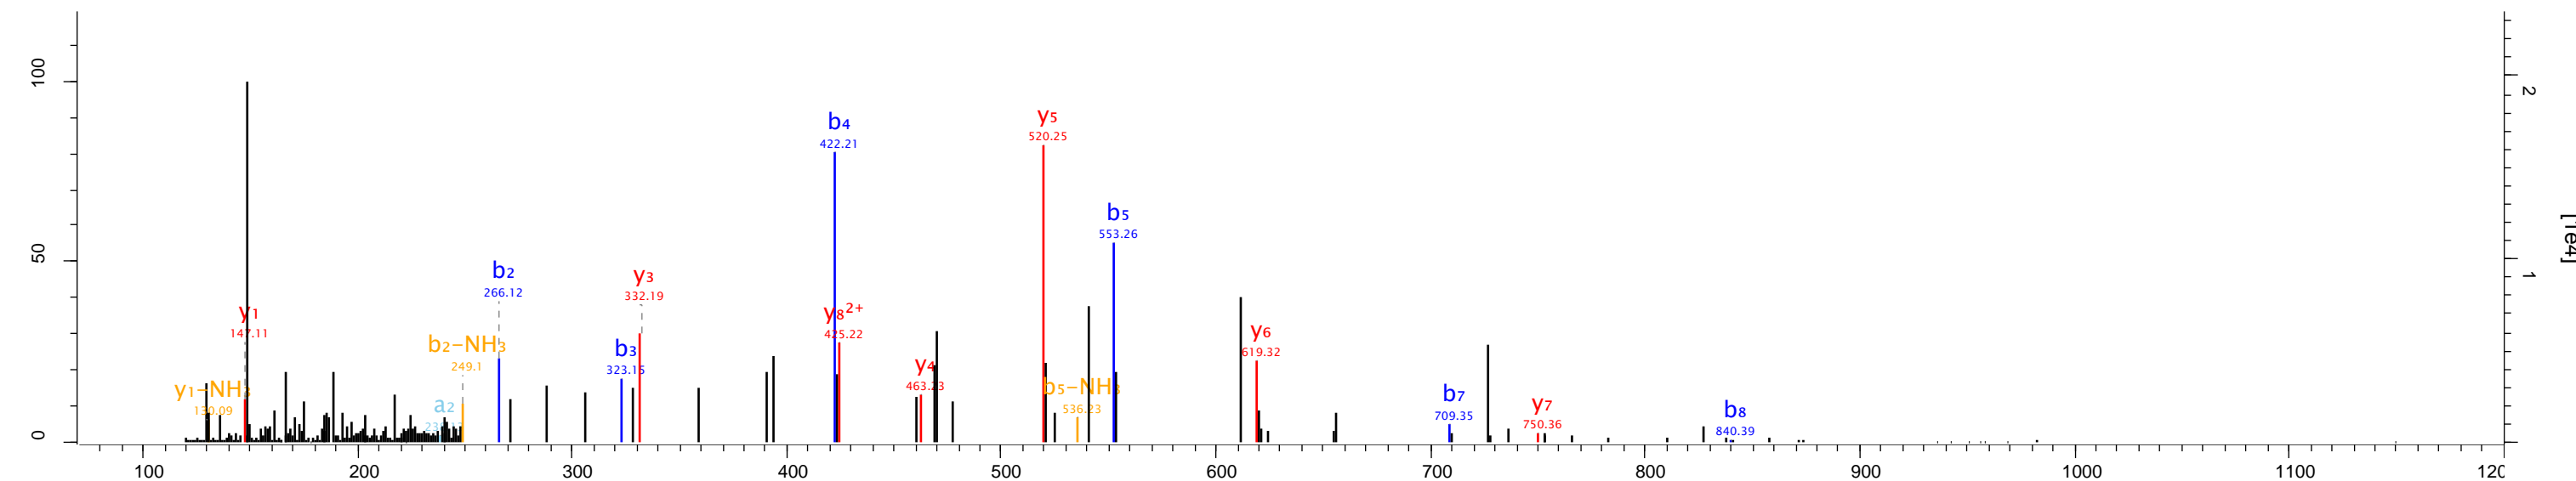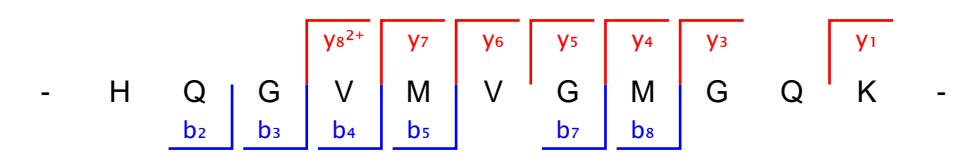

Spectral Annotation for Single-Peptide IDs between Single D11 Cells using Q-OT-LIT



Raw file 2015-01-08\_CL04\_Blastomere-15 Scan 28956 Method ITMS; HCD Score 99.28 m/z 572.8

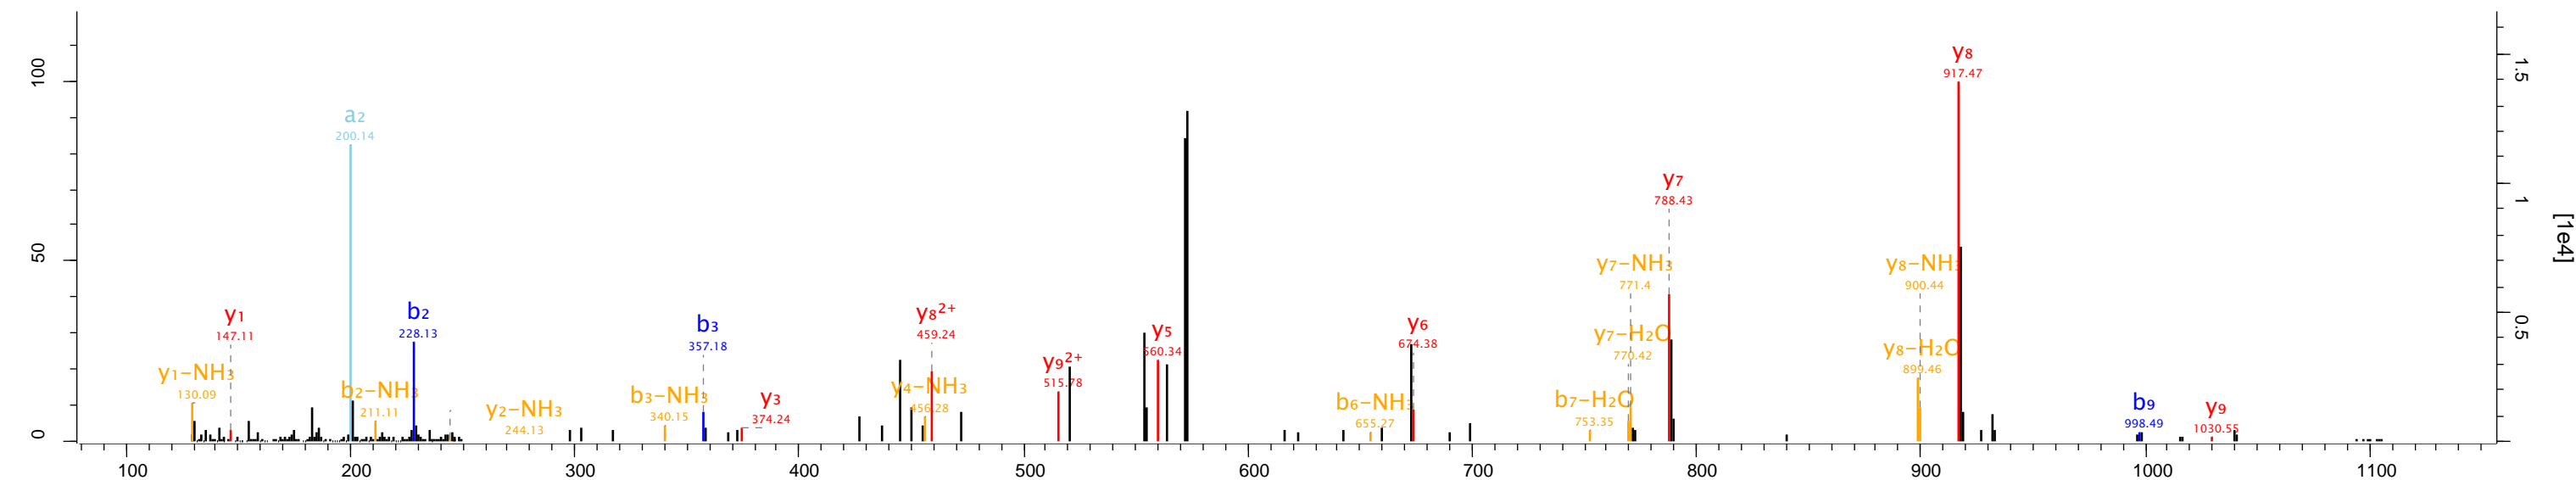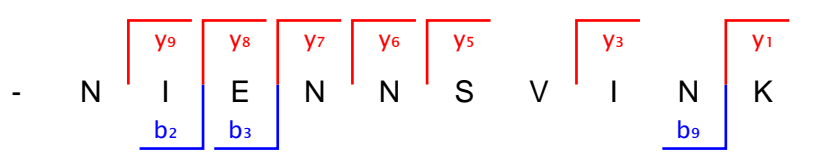

Spectral Annotation for Single-Peptide IDs between Single D11 Cells using Q-OT-LIT

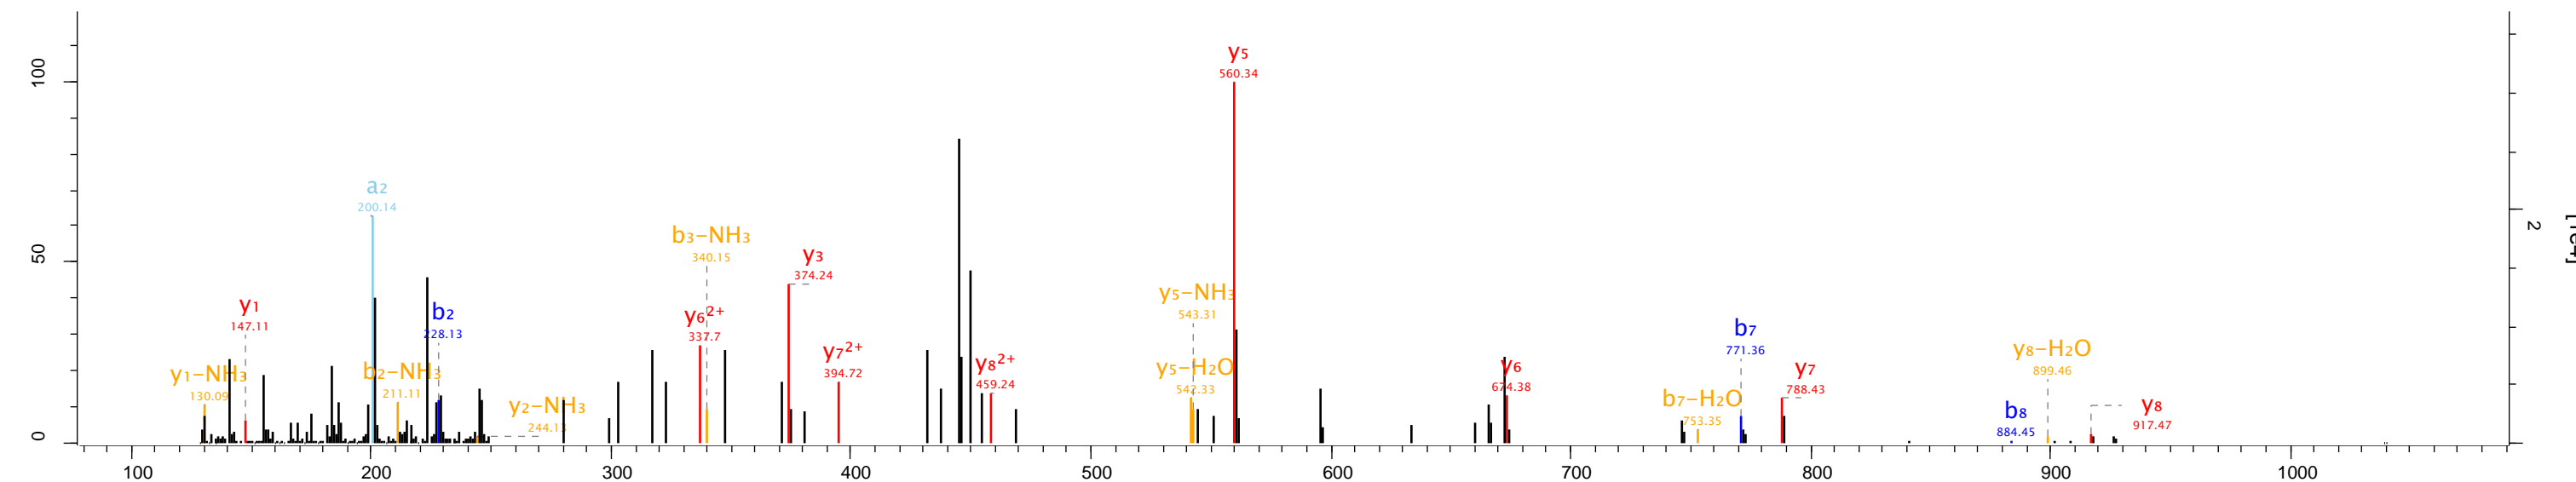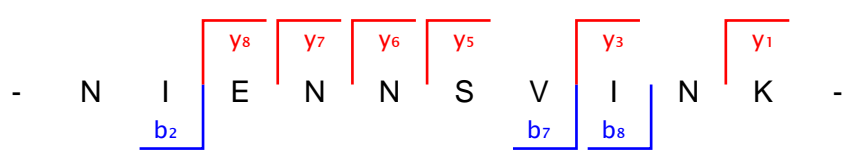

Raw file 2015-01-08\_CL04\_Blastomere-15 Scan 28976 Method ITMS; HCD Score 134.57 m/z 572.8

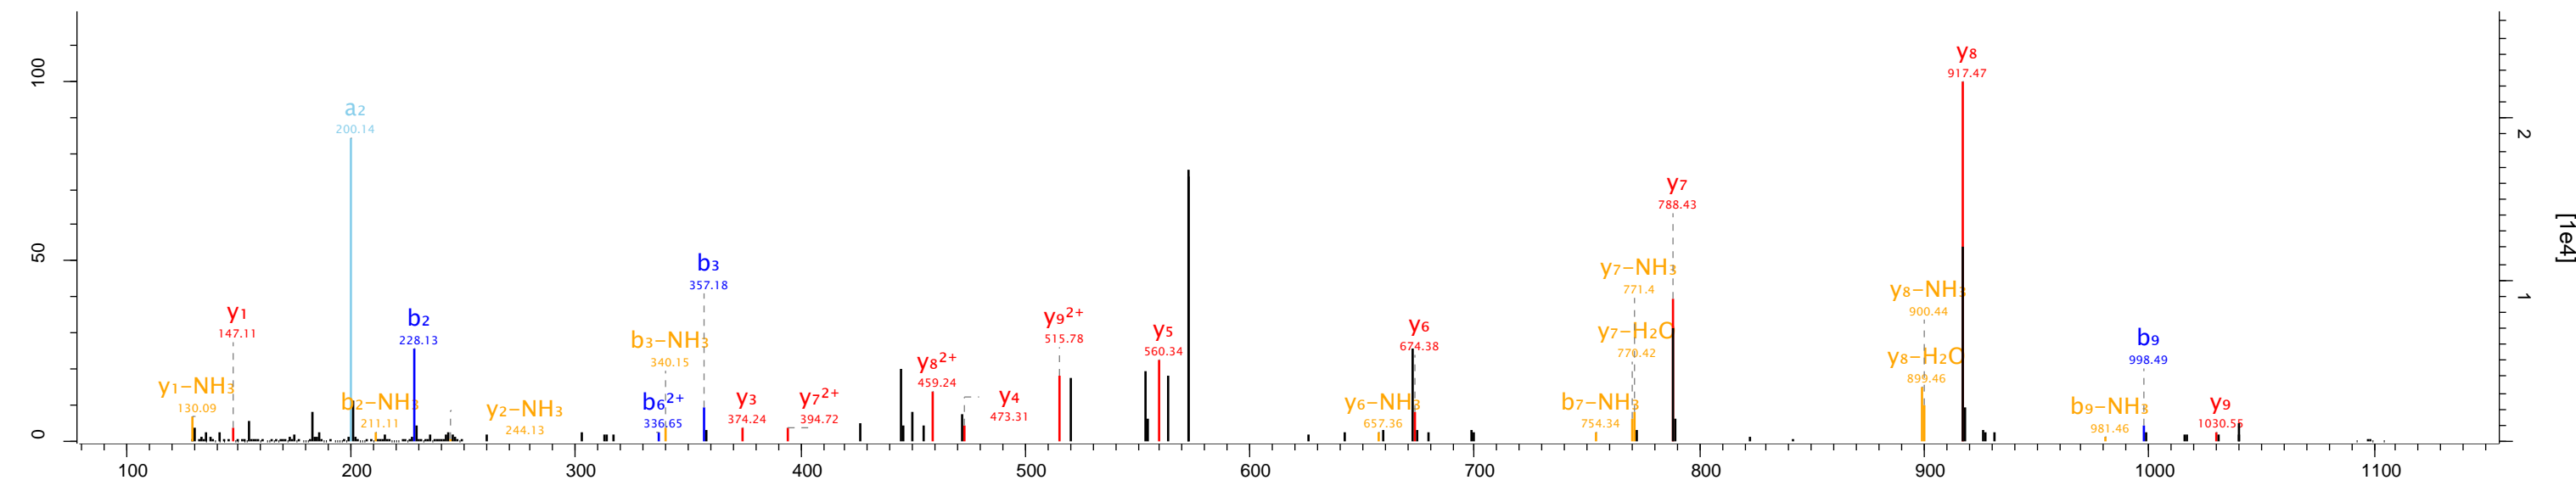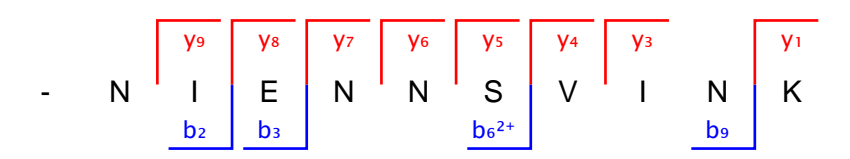

Spectral Annotation for Single-Peptide IDs between Single D11 Cells using Q-OT-LIT

Raw file 2015-01-08\_CL04\_Blastomere-15 Scan 29014 Method ITMS; HCD Score 105.98 m/z 400.24

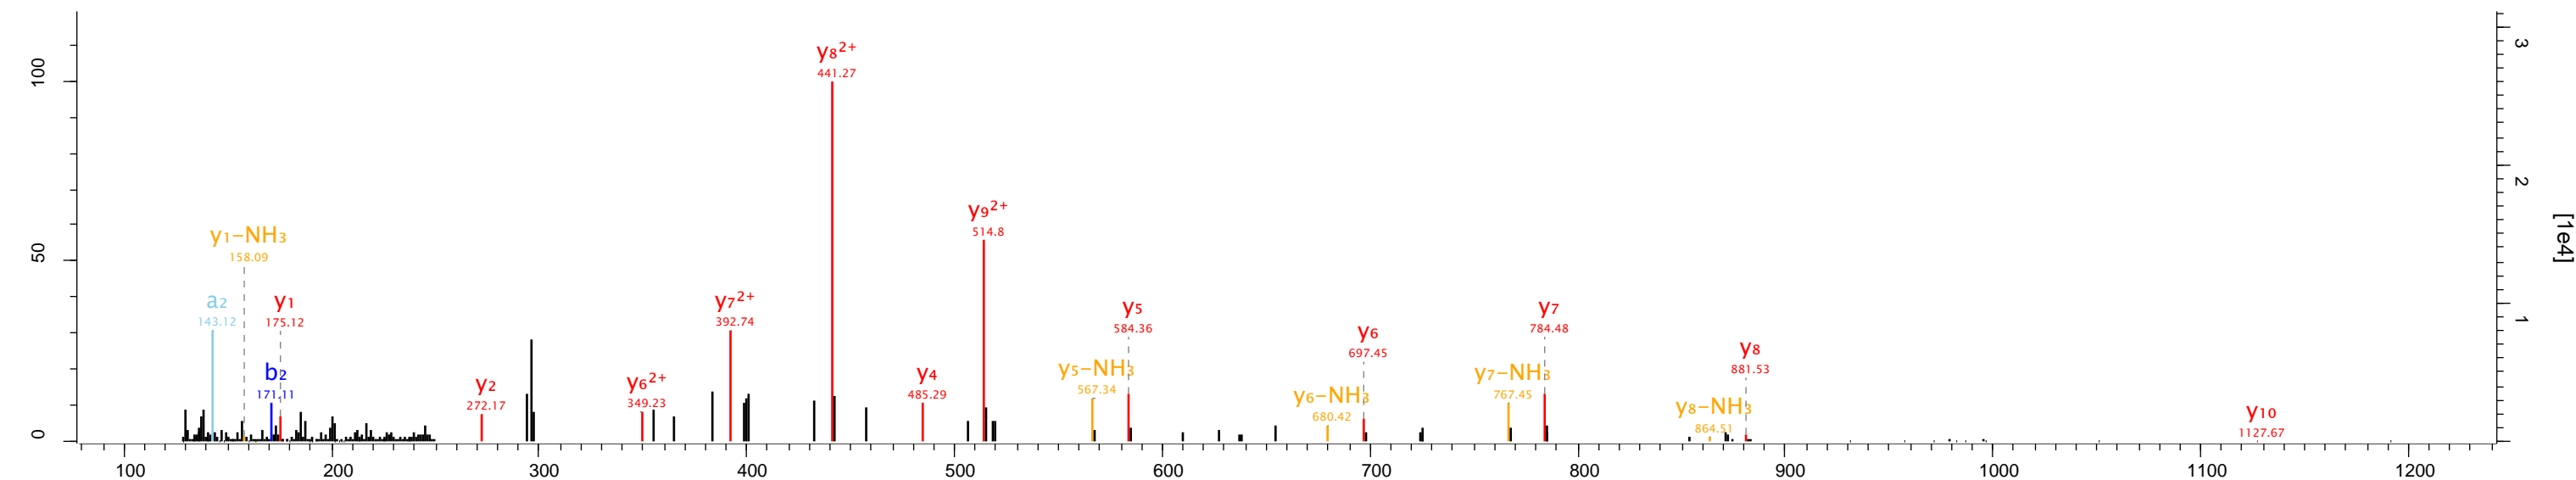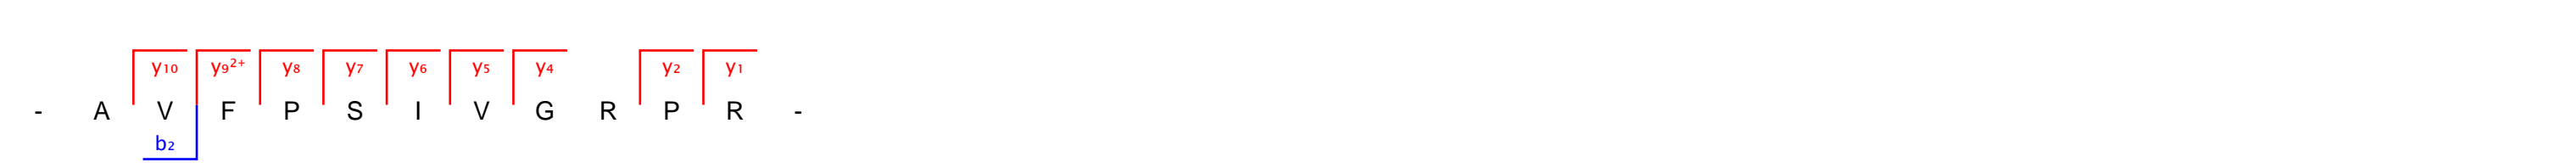

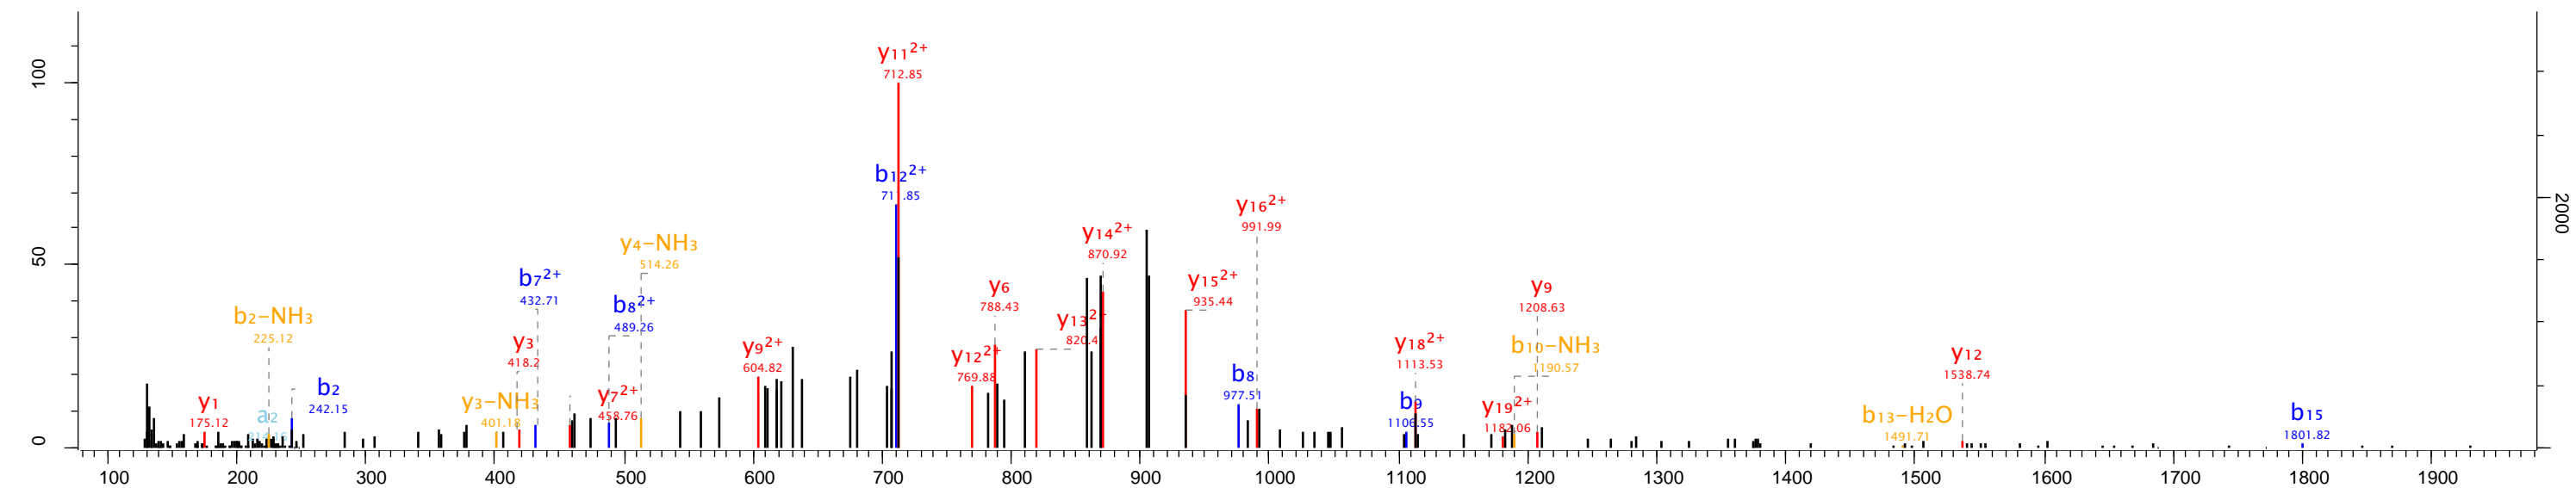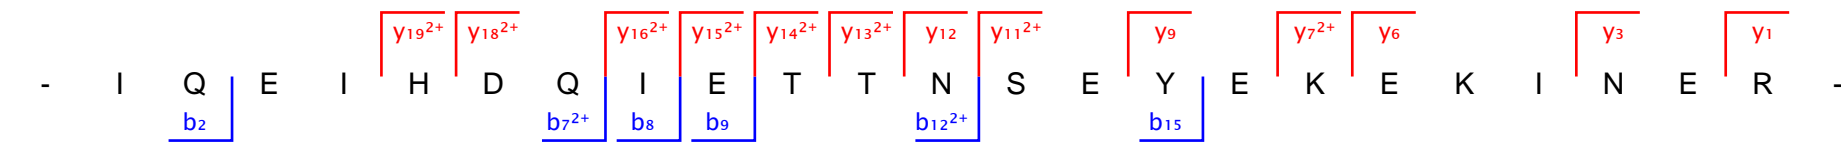

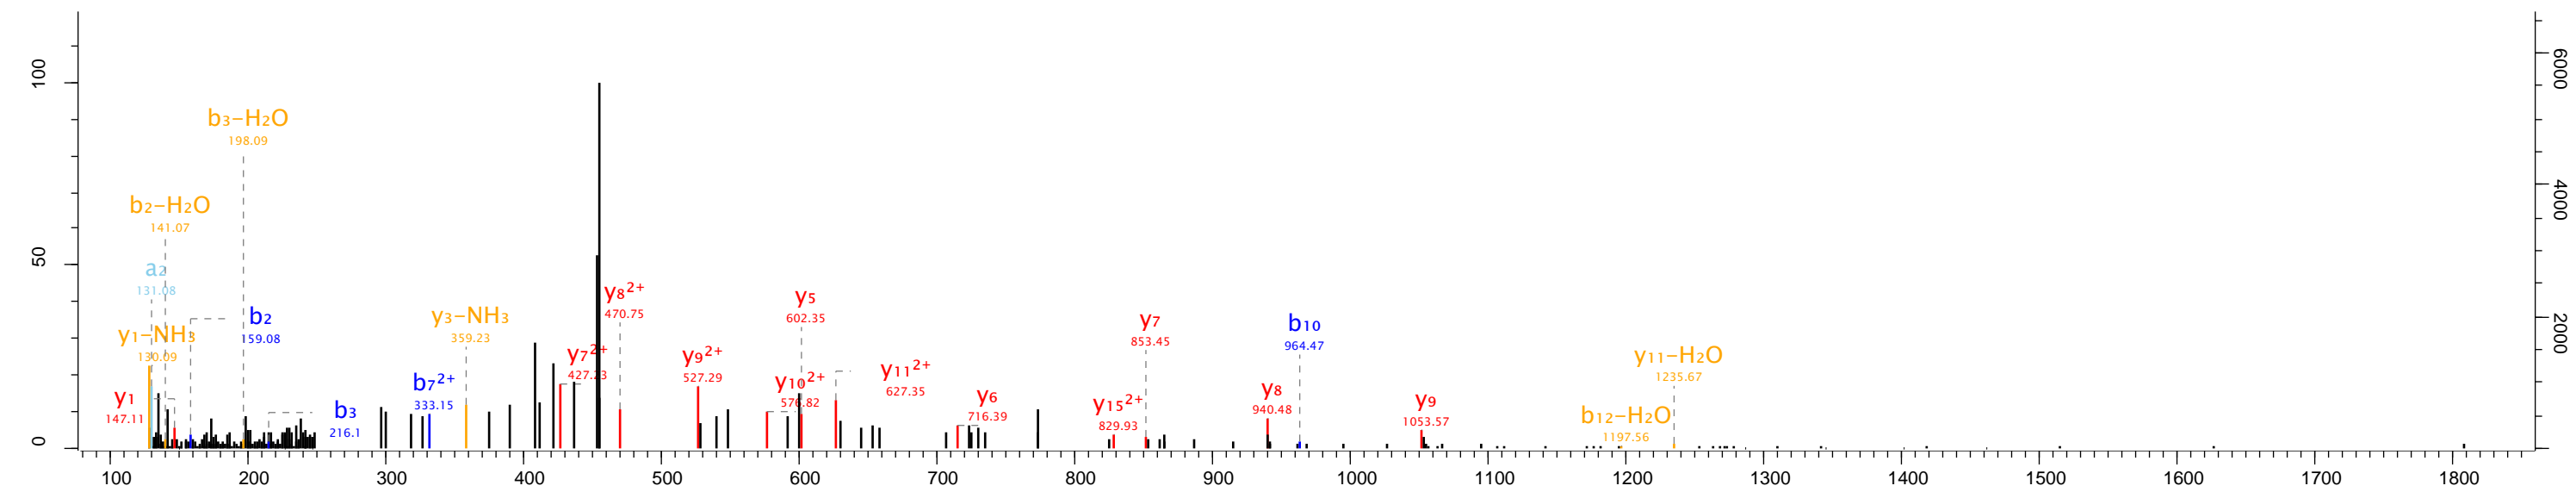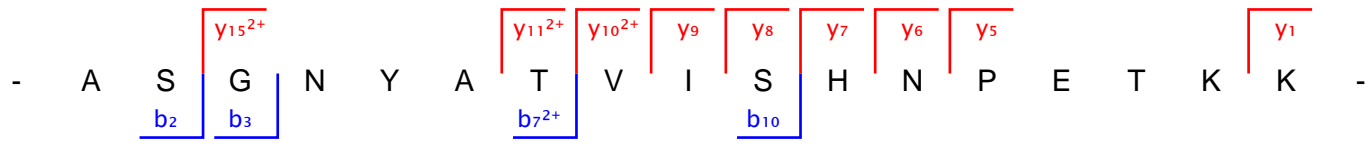

Raw file 2015-01-08\_CL04\_Blastomere-15  
 Scan 29306 Method ITMS; HCD Score 36.43 m/z 712.6

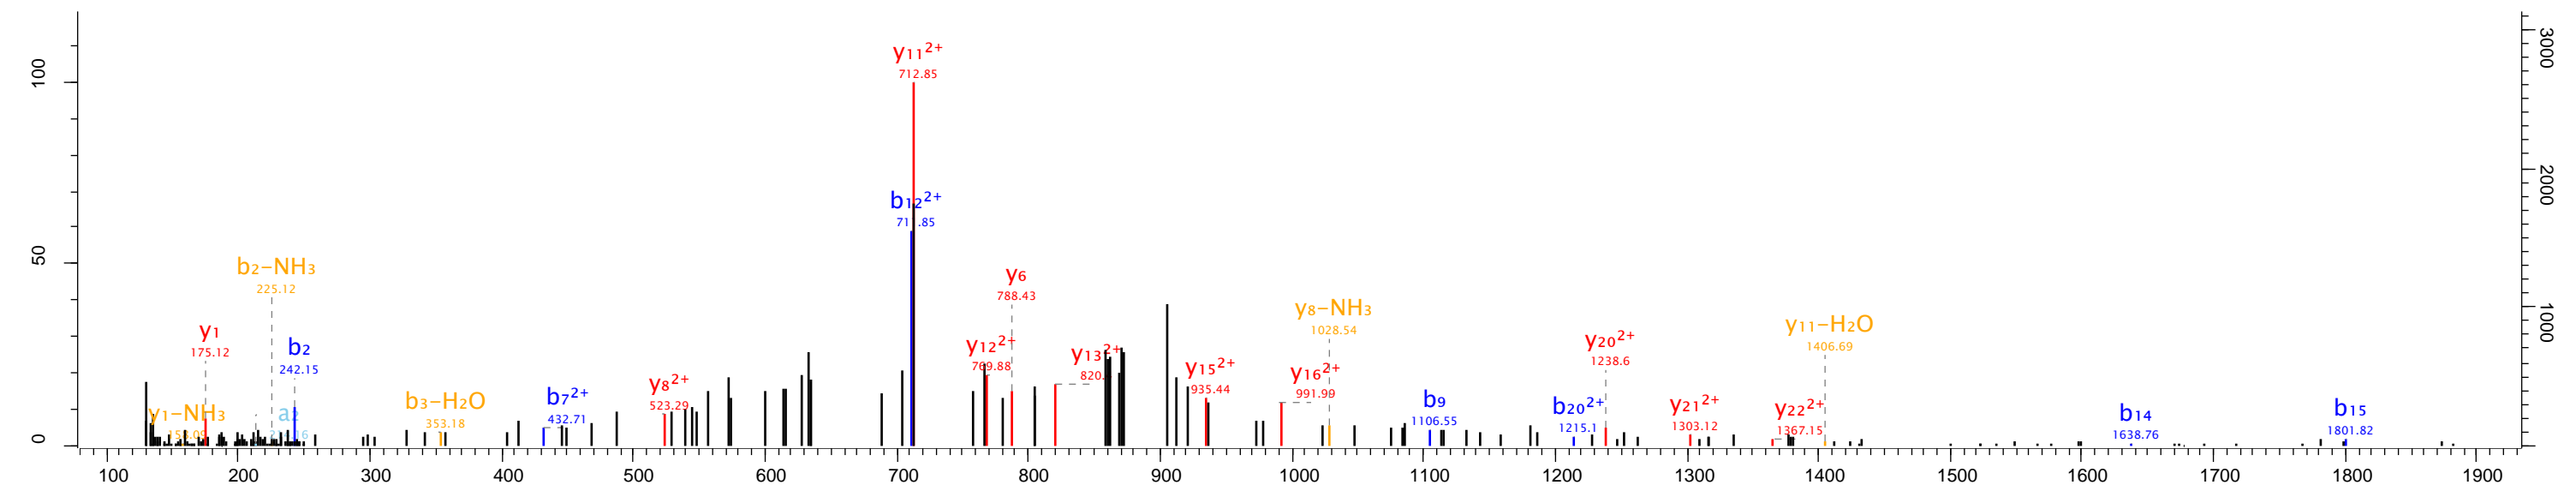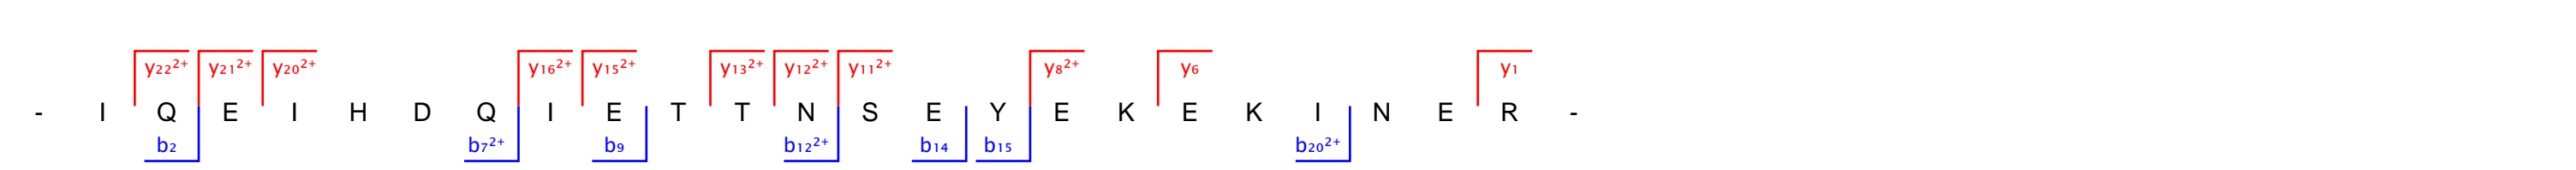

Raw file 2015-01-08\_CL04\_Blastomere-15 Scan 29333 Method ITMS; HCD Score 49 m/z 400.24

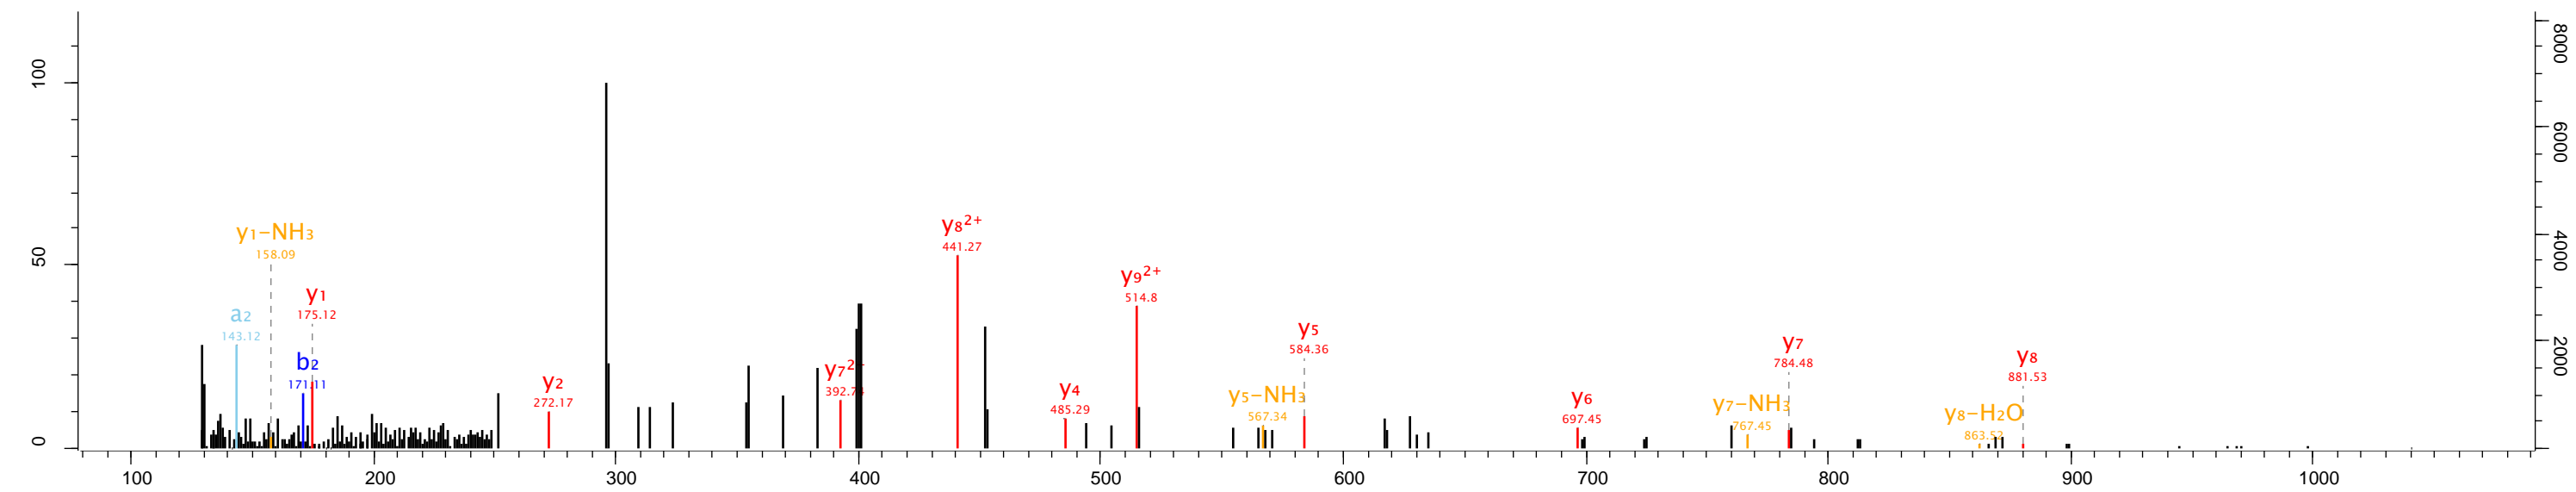

Spectral Annotation for Single-Peptide IDs between Single D11 Cells using Q-OT-LIT



Raw file: 2015-01-08\_CL04\_Blastomere-15  
 Scan: 29359 Method: ITMS; HCD Score: 79.2 m/z: 586.29

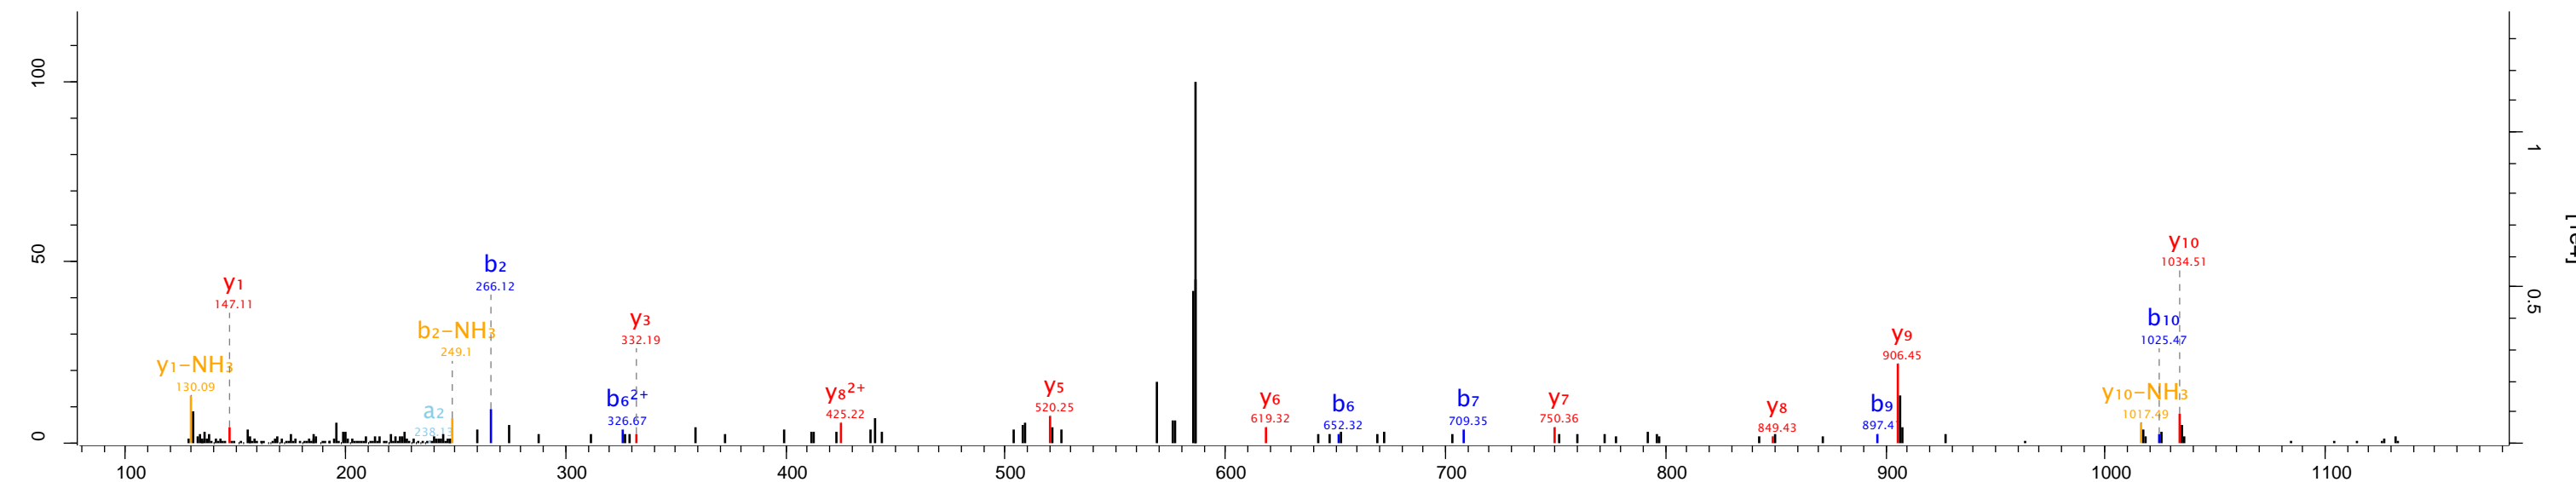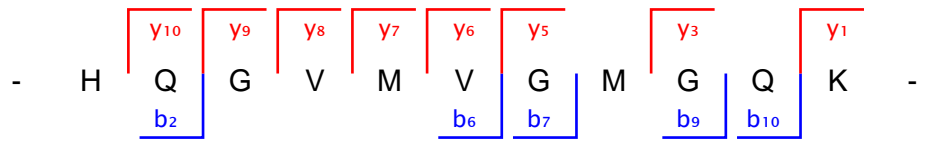

Spectral Annotation for Single-Peptide IDs between Single D11 Cells using Q-OT-LIT

Raw file: 2015-01-08\_CL04\_Blastomere-15  
 Scan: 29399 Method: ITMS; HCD Score: 86.01 m/z: 586.29

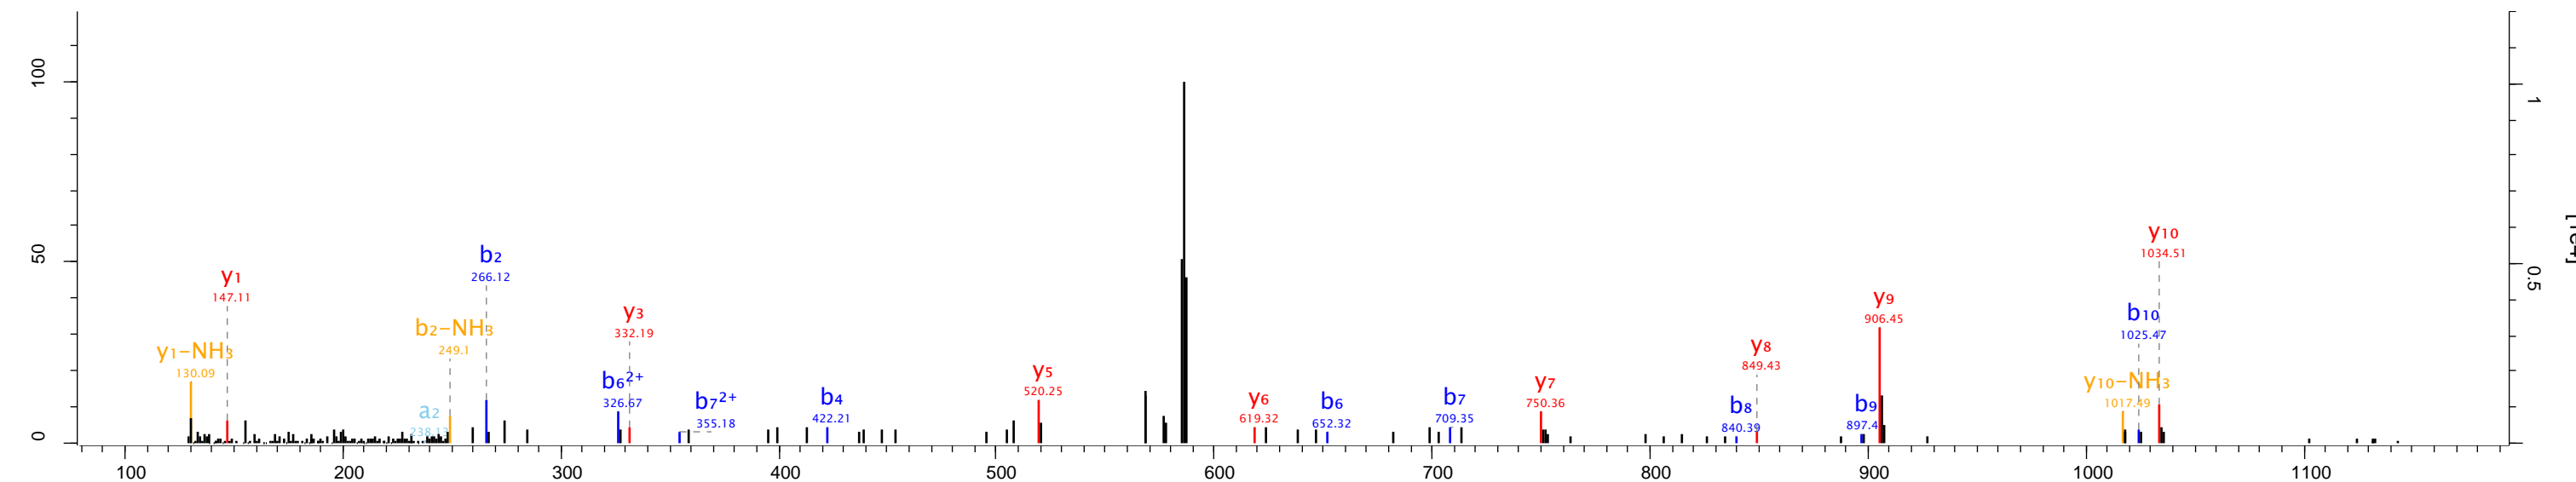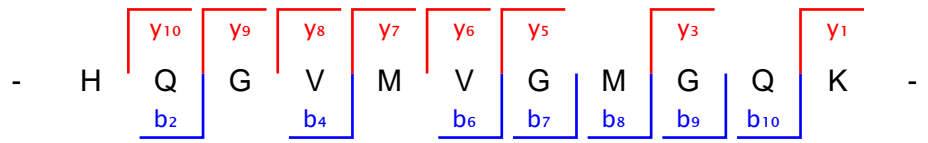

Spectral Annotation for Single-Peptide IDs between Single D11 Cells using Q-OT-LIT

Raw file 2015-01-08\_CL04\_Blastomere-15 Scan 29414 Method ITMS; HCD Score 102.53 m/z 586.29

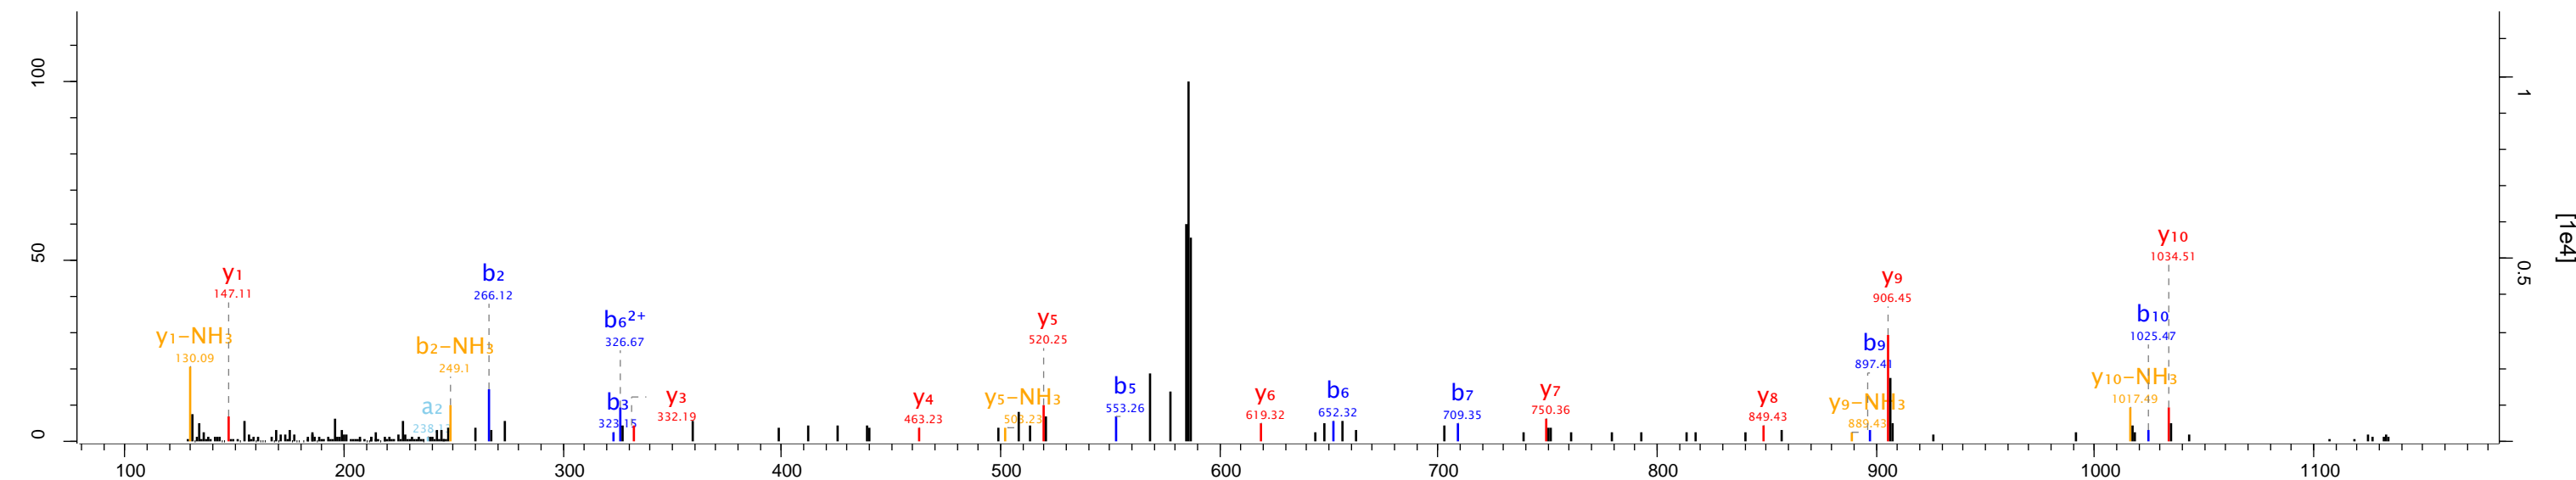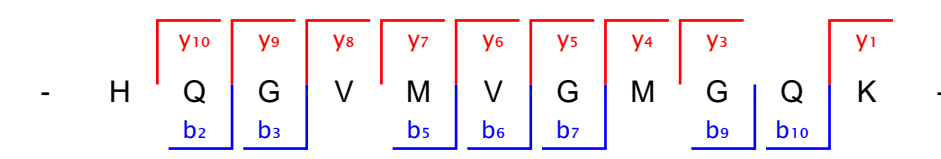

Raw file: 2015-01-08\_CL04\_Blastomere-15  
 Scan: 29426 Method: ITMS; HCD Score: 99.57 m/z: 586.29

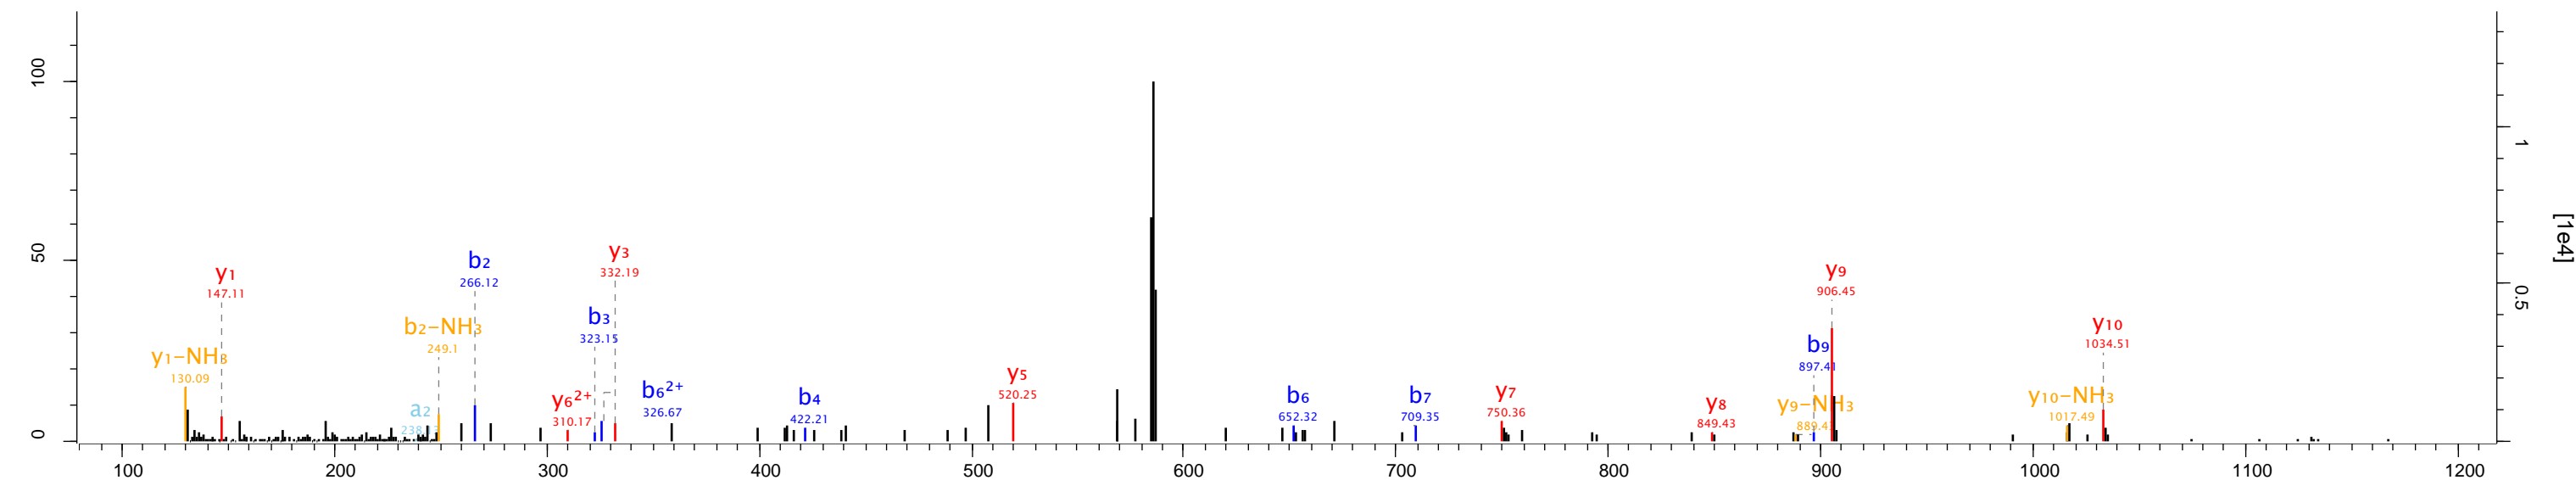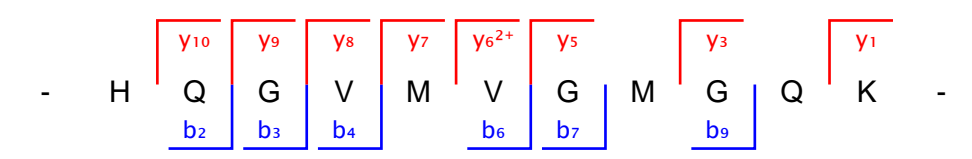

Raw file 2015-01-08\_CL04\_Blastomere-15 Scan 29431 Method ITMS; HCD Score 46.8 m/z 391.19

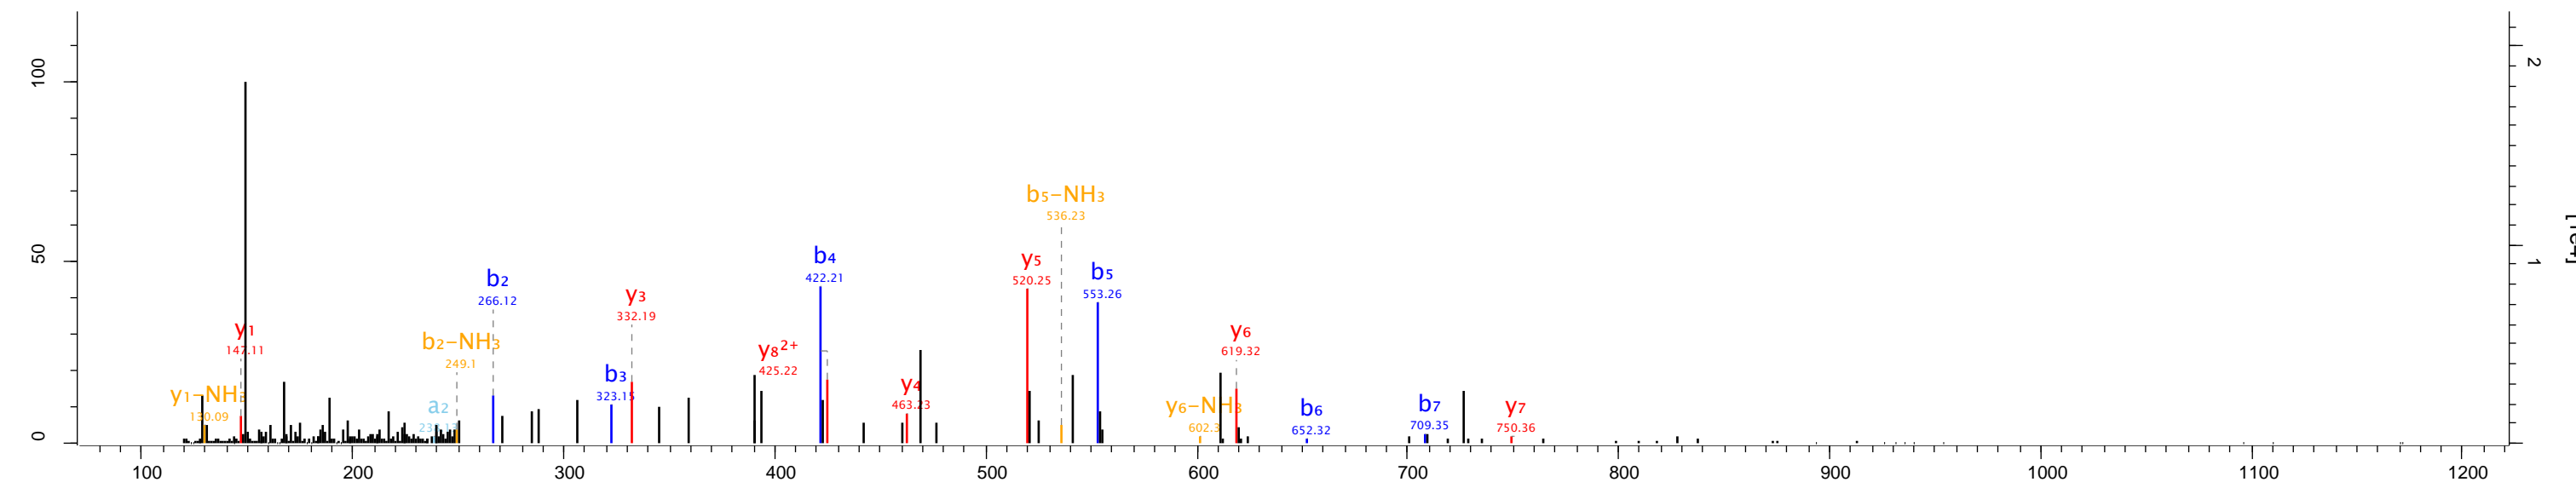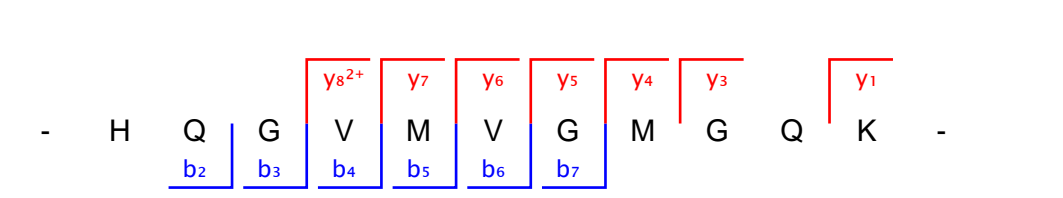

Spectral Annotation for Single-Peptide IDs between Single D11 Cells using Q-OT-LIT

Raw file 2015-01-08\_CL04\_Blastomere-15 Scan 29471 Method ITMS; HCD Score 47.84 m/z 391.19

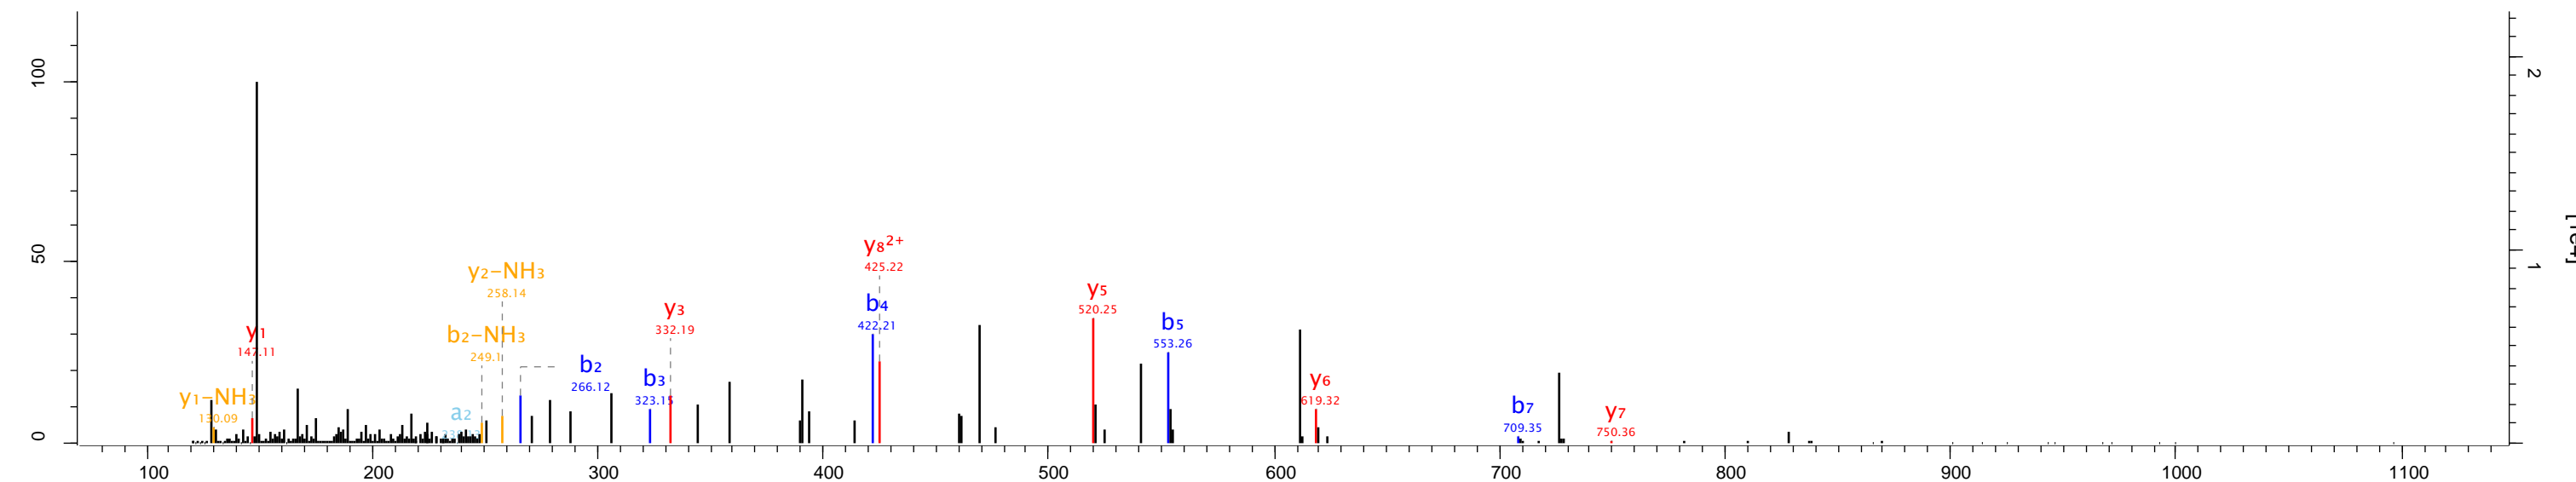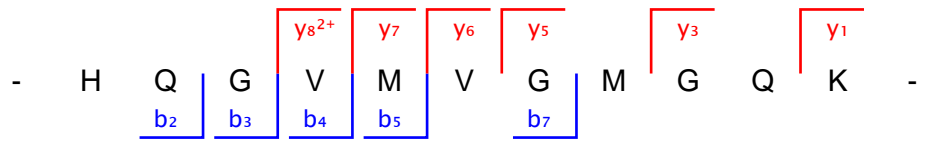

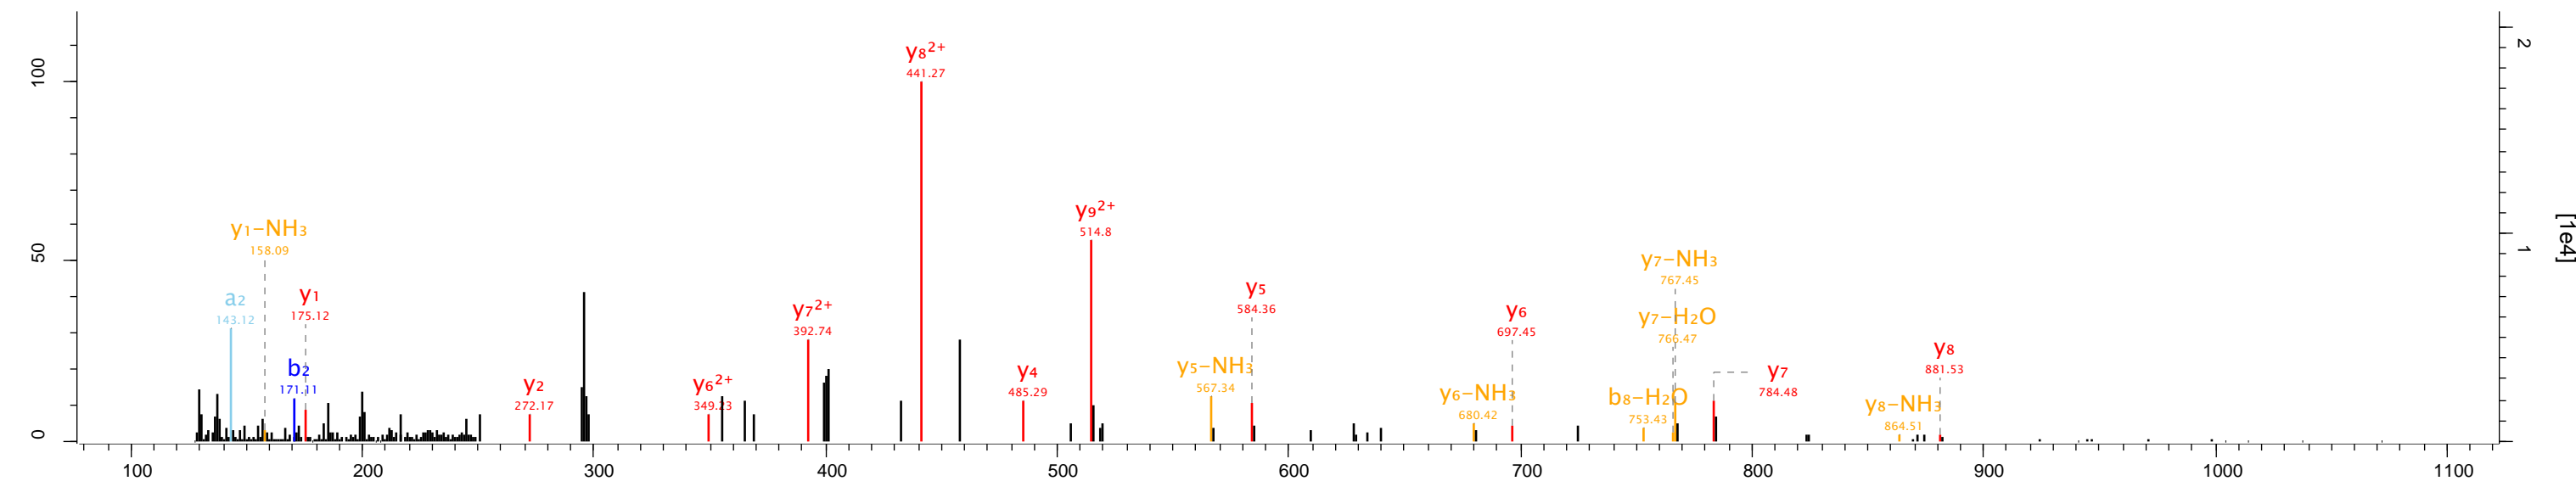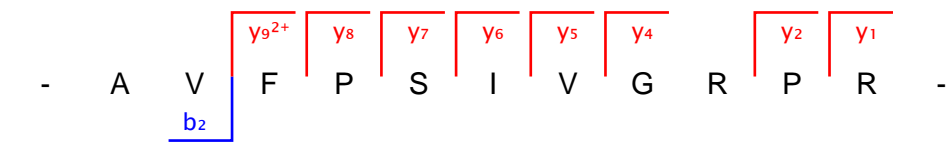

Raw file 2015-01-08\_CL04\_Blastomere-15 Scan 29865 Method ITMS; HCD Score 117.7 m/z 400.24

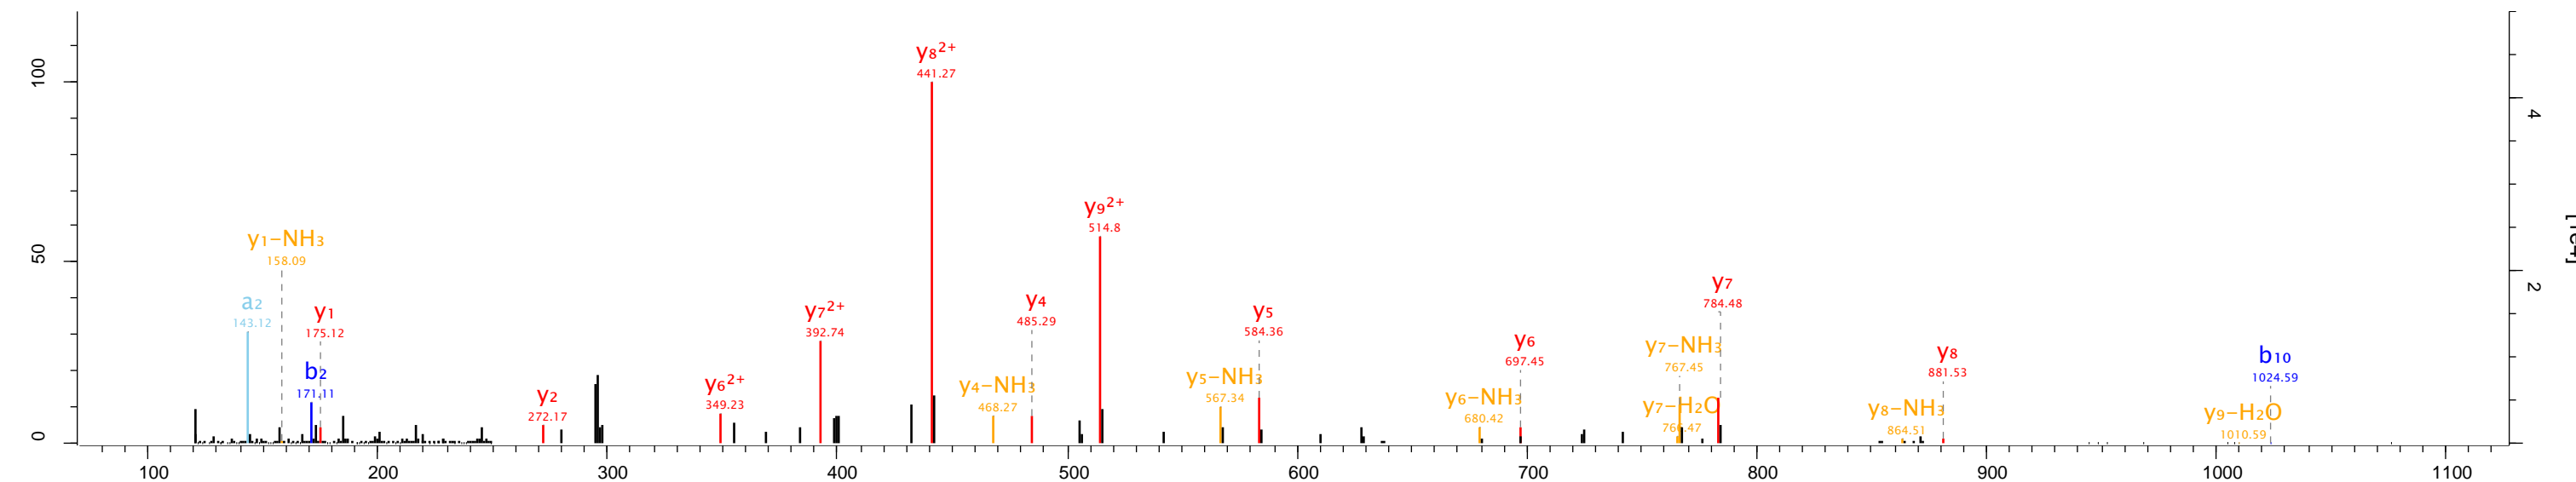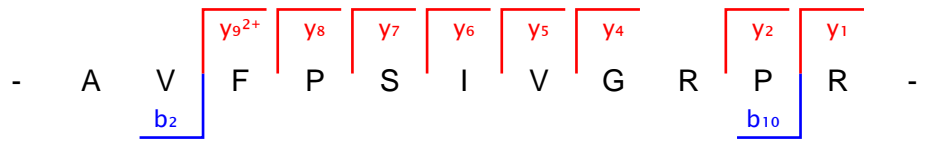

Spectral Annotation for Single-Peptide IDs between Single D11 Cells using Q-OT-LIT



Raw file 2015-01-08\_CL04\_Blastomere-15 Scan 29878 Method ITMS; HCD Score 121.73 m/z 400.24

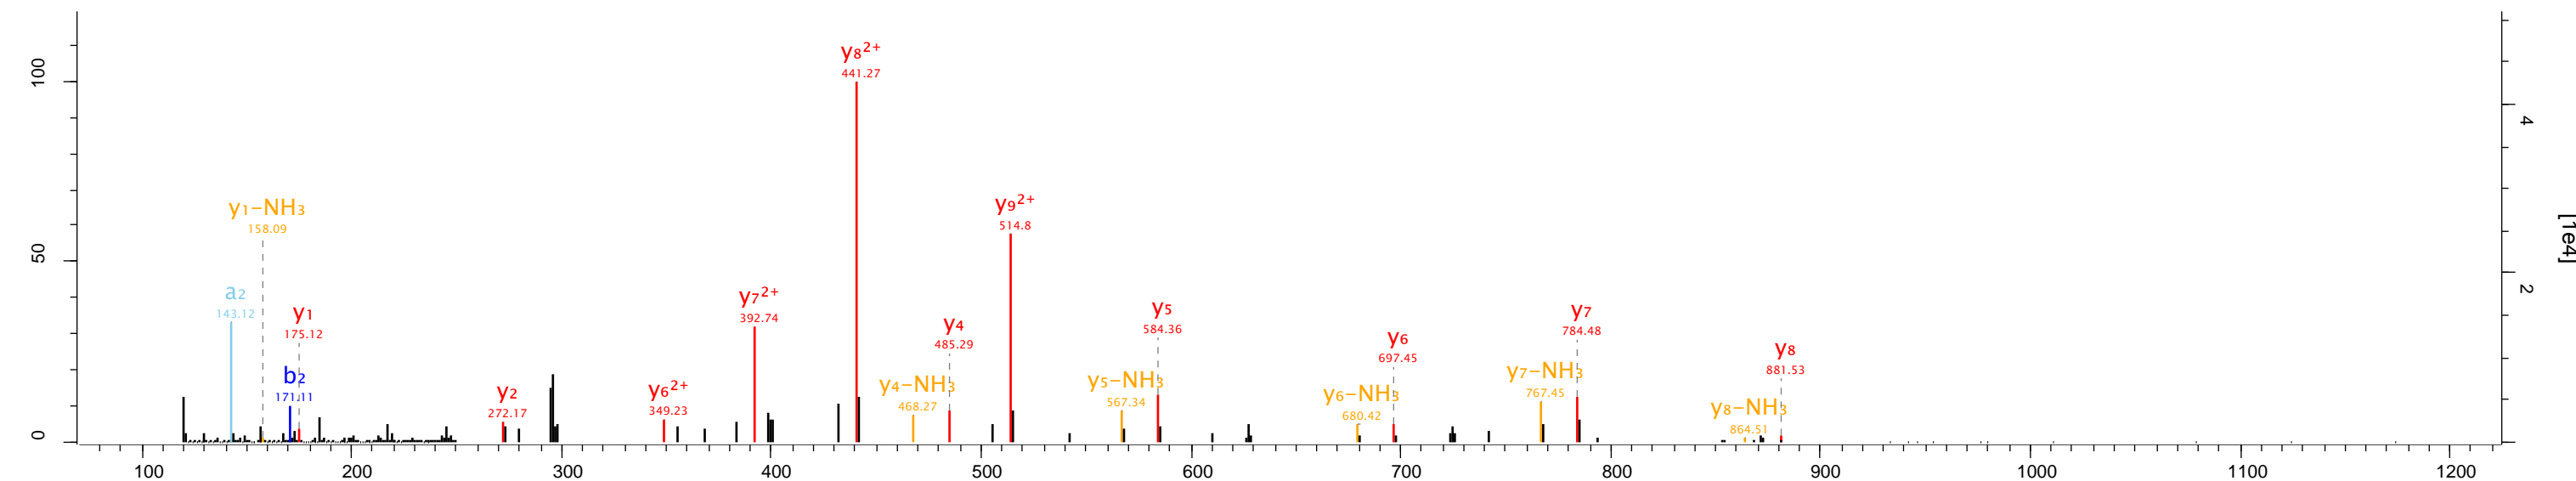

Raw file 2015-01-08\_CL04\_Blastomere-15 Scan 29890 Method ITMS; HCD Score 114.4 m/z 400.24

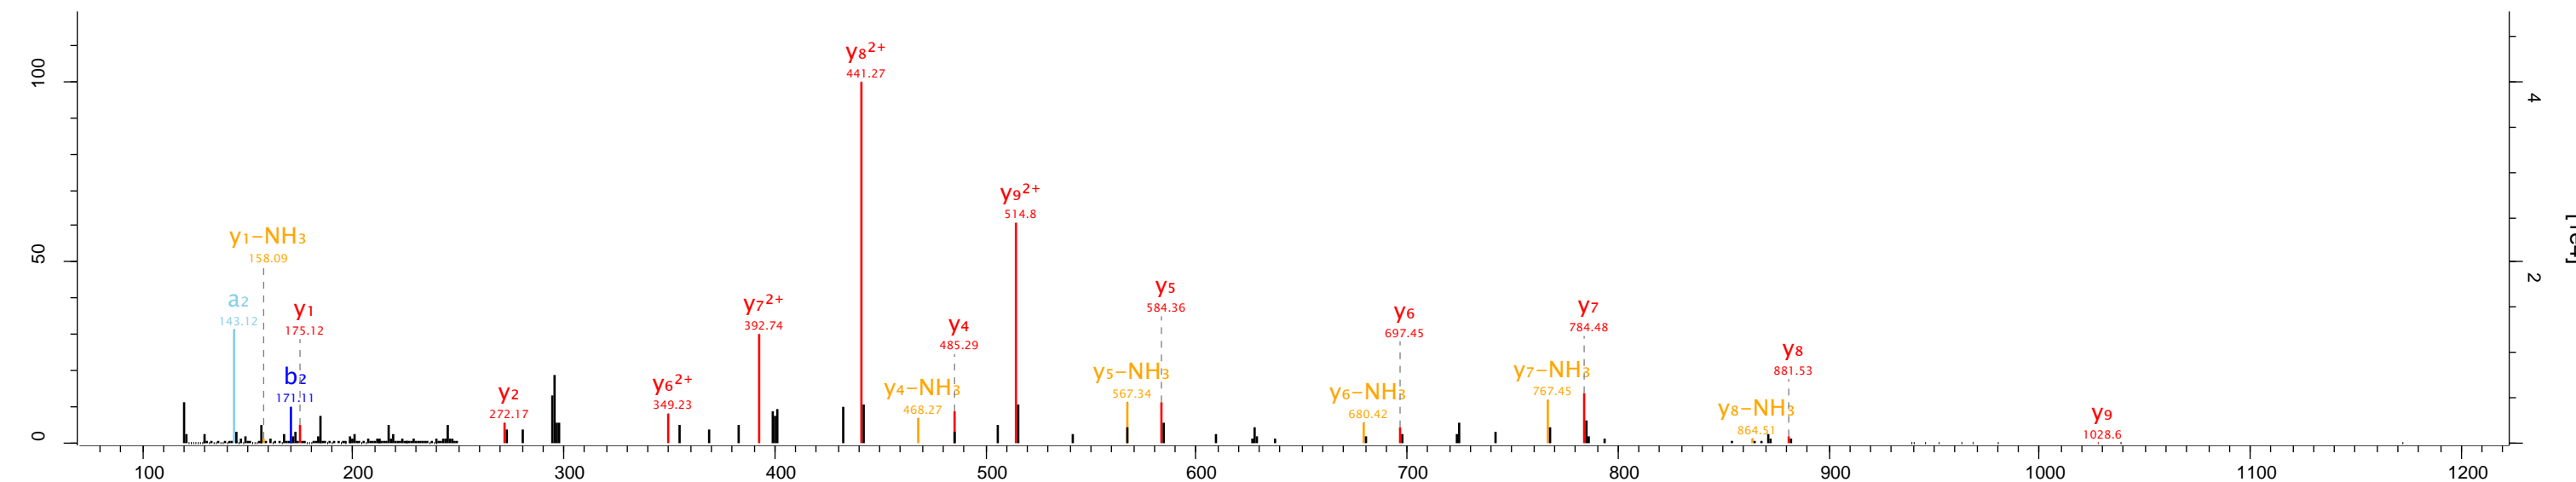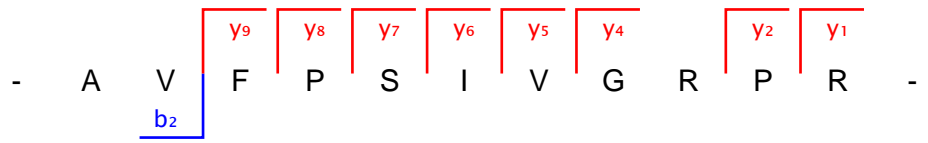

Raw file 2015-01-08\_CL04\_Blastomere-15 Scan 30007 Method ITMS; HCD Score 76.93 m/z 599.85

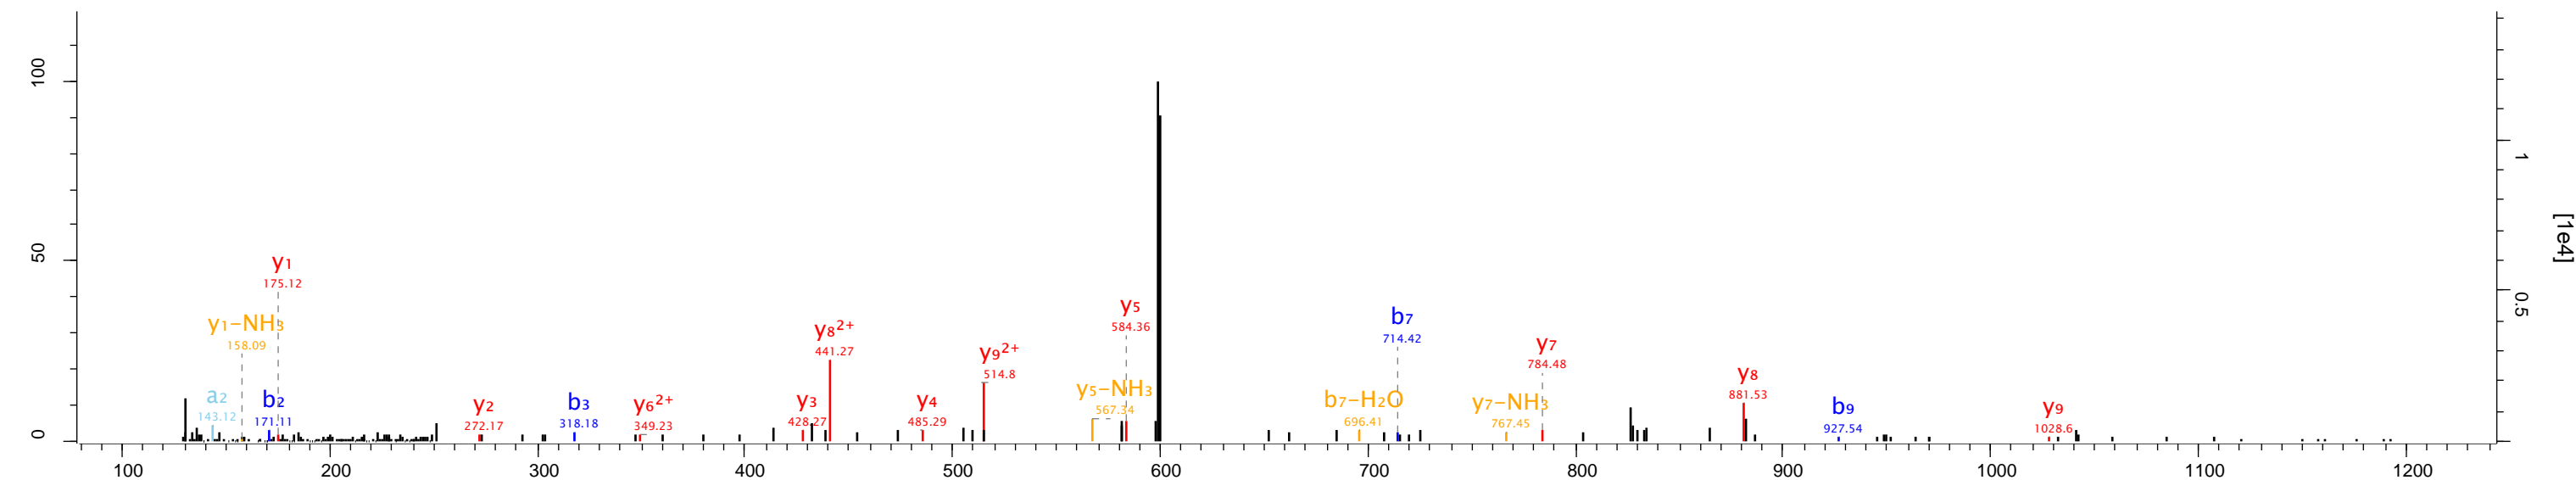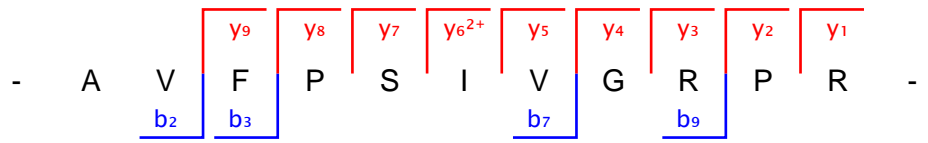

Spectral Annotation for Single-Peptide IDs between Single D11 Cells using Q-OT-LIT

Raw file 2015-01-08\_CL04\_Blastomere-15 Scan 30025 Method ITMS; HCD Score 34.91 m/z 692.53

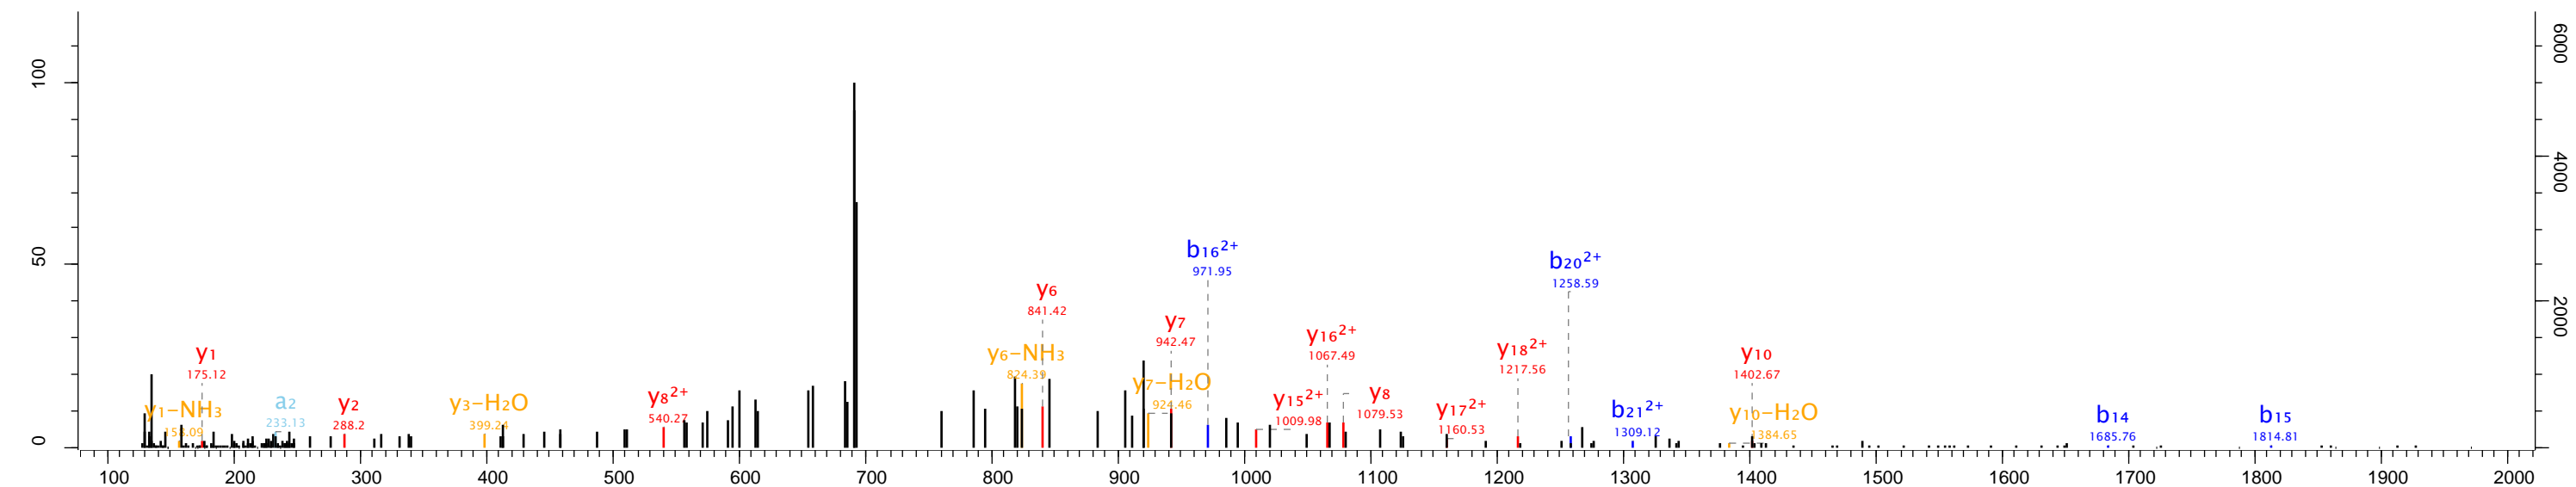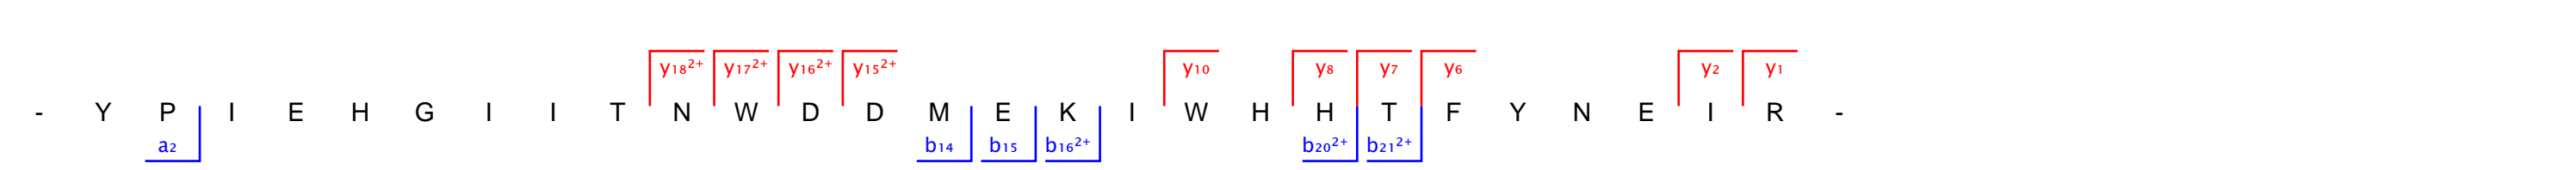

Spectral Annotation for Single-Peptide IDs between Single D11 Cells using Q-OT-LIT

Raw file 2015-01-08\_CL04\_Blastomere-15 Scan 30160 Method ITMS; HCD Score 106.88 m/z 400.24

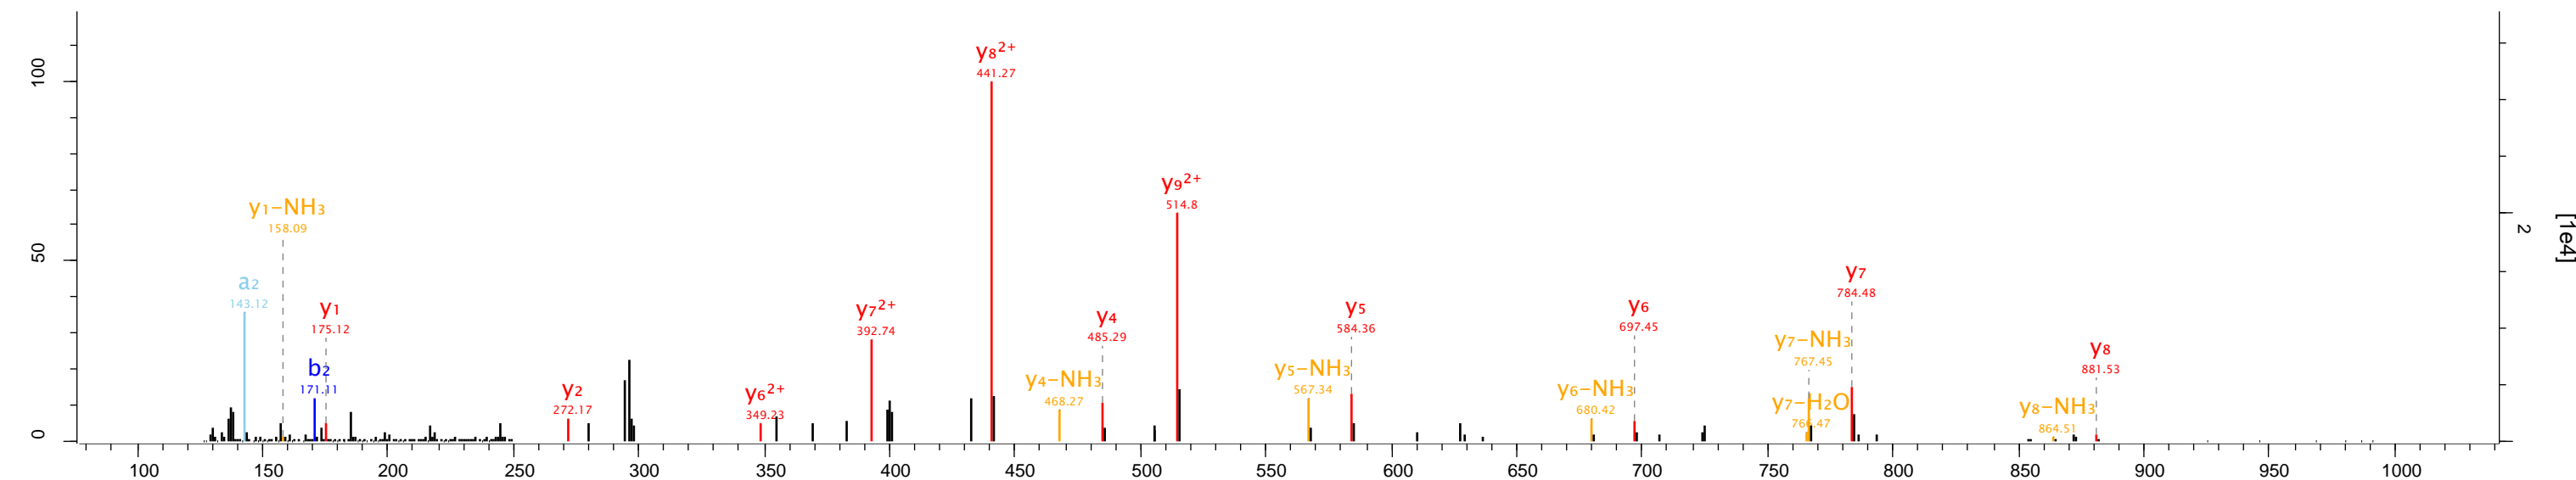

Spectral Annotation for Single-Peptide IDs between Single D11 Cells using Q-OT-LIT

Raw file 2015-01-08\_CL04\_Blastomere-15 Scan 30171 Method ITMS; HCD Score 98.05 m/z 400.24

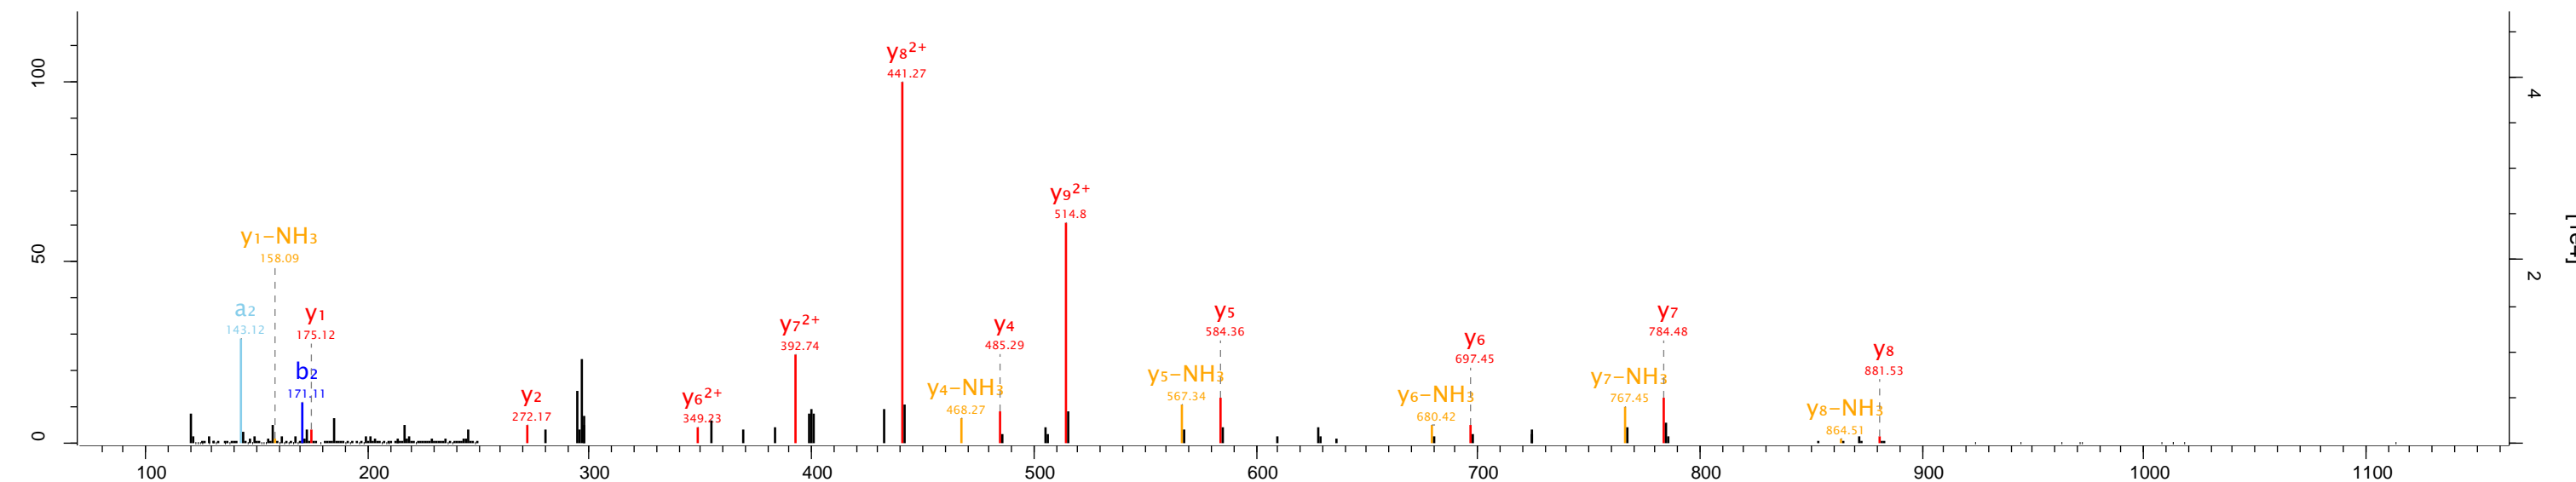

Raw file 2015-01-08\_CL04\_Blastomere-15 Scan 30187 Method ITMS; HCD Score 107.21 m/z 400.24

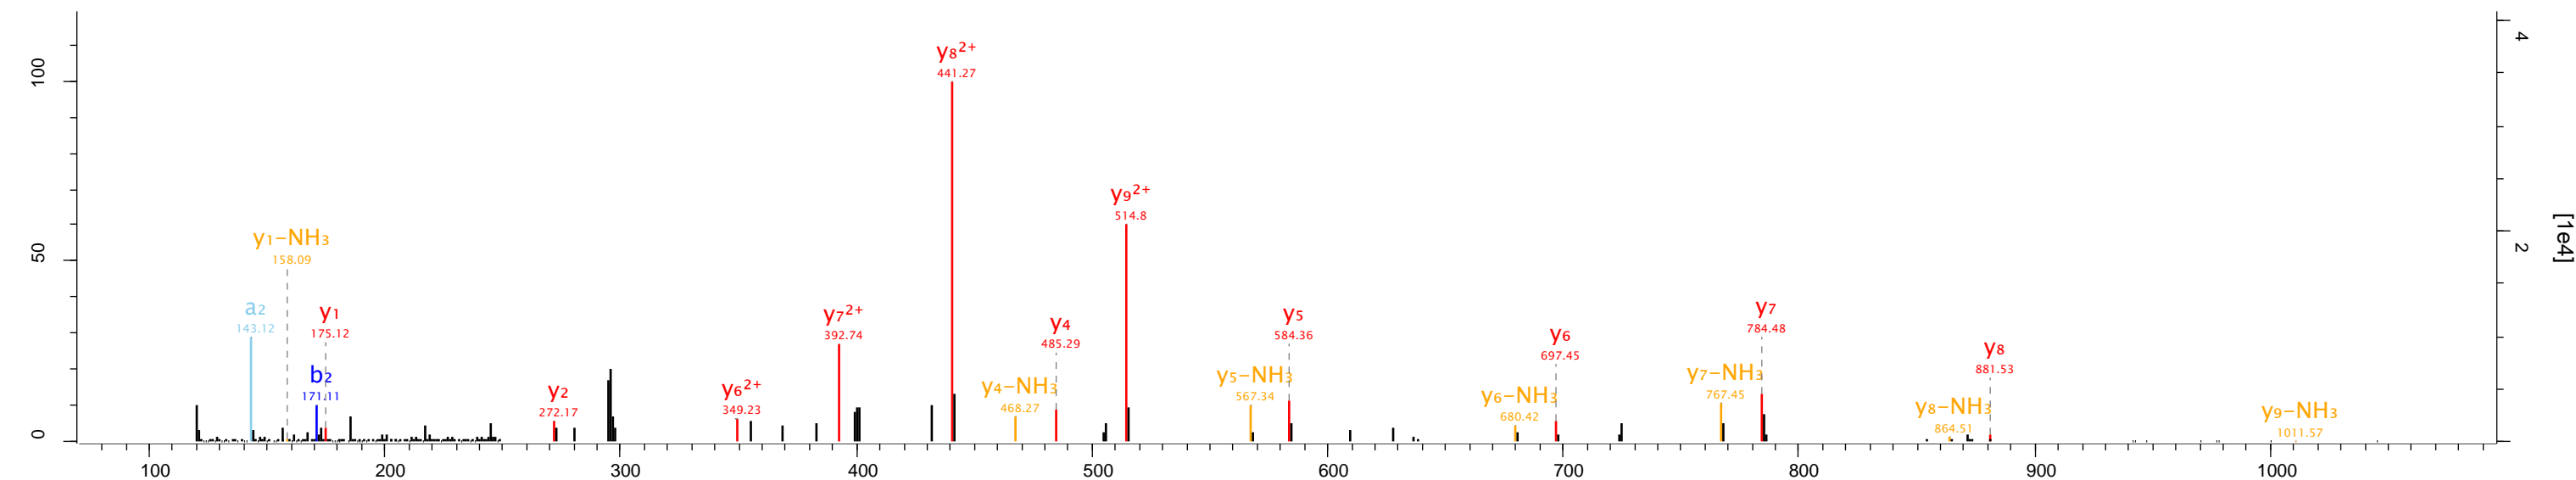

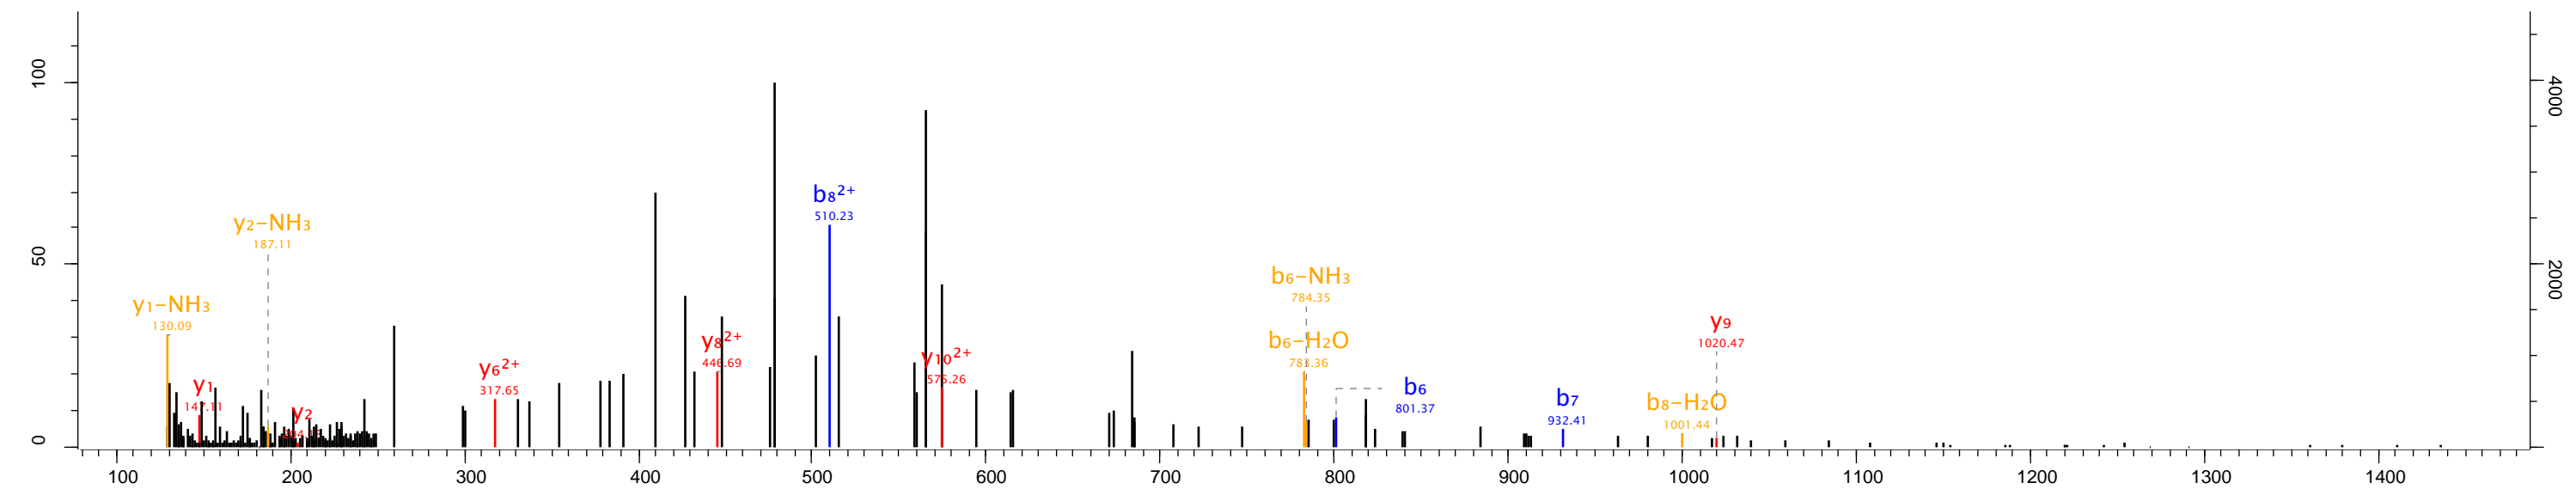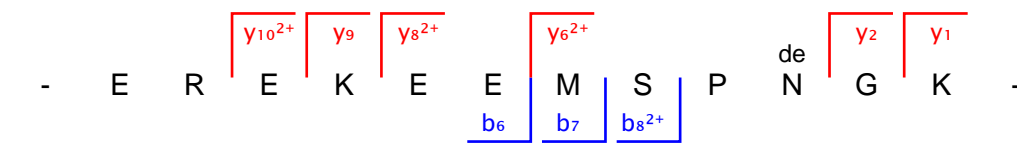



Raw file 2015-01-08\_CL04\_Blastomere-15  
 Scan 30566 Method ITMS; HCD Score 65.21 m/z 692.53

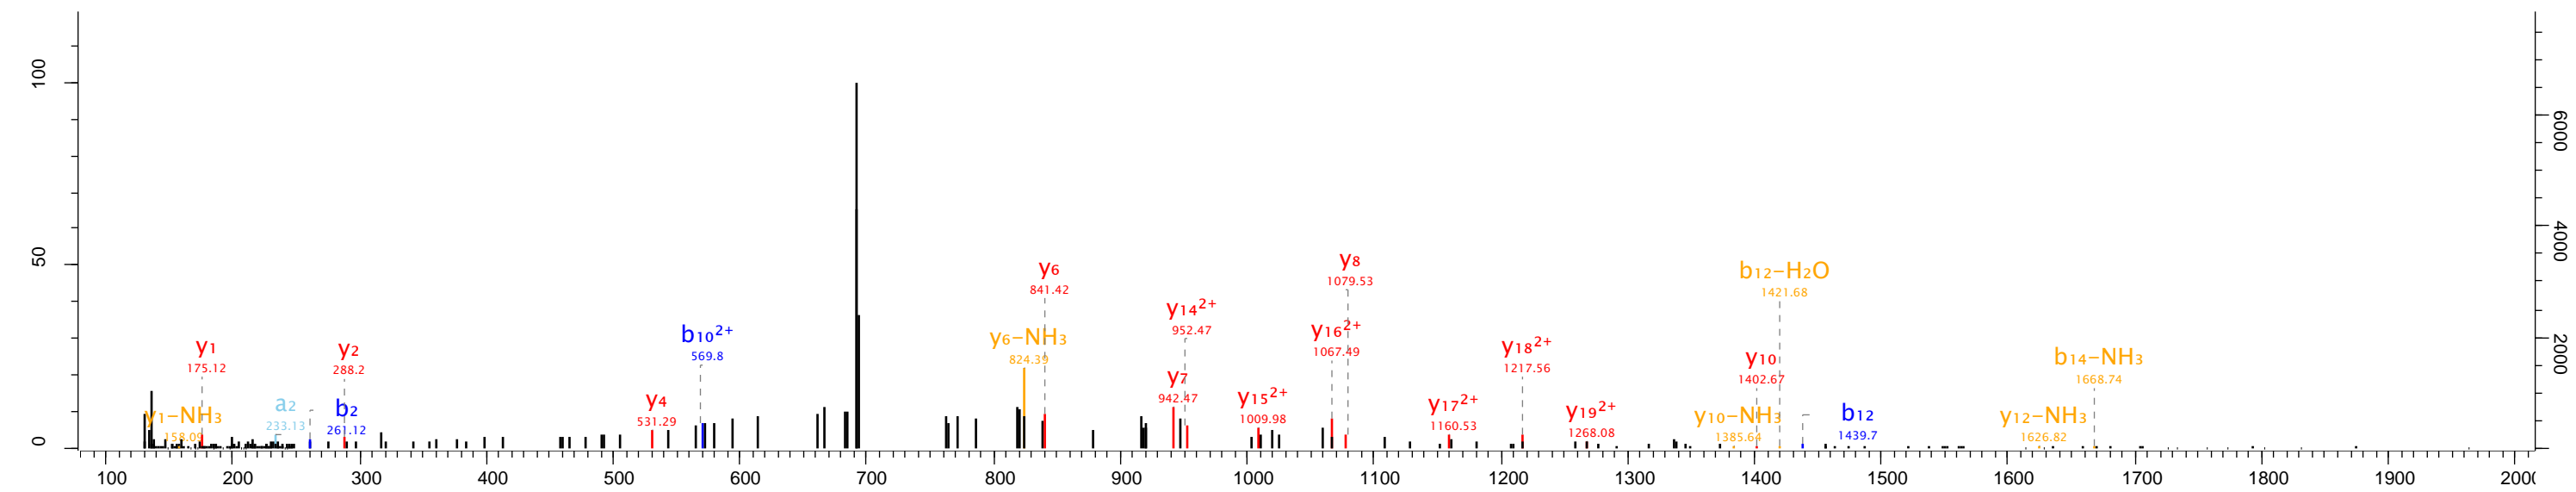

- Y P I E H G I I T N W D D M E K I W H H T F Y N E I R -

Fragmentation labels below the sequence:

- b<sub>2</sub> (under P)
- b<sub>10</sub><sup>2+</sup> (under N)
- b<sub>12</sub> (under D)
- y<sub>19</sub><sup>2+</sup> (above T)
- y<sub>18</sub><sup>2+</sup> (above N)
- y<sub>17</sub><sup>2+</sup> (above W)
- y<sub>16</sub><sup>2+</sup> (above D)
- y<sub>15</sub><sup>2+</sup> (above D)
- y<sub>14</sub><sup>2+</sup> (above M)
- y<sub>10</sub> (above W)
- y<sub>8</sub> (above H)
- y<sub>7</sub> (above T)
- y<sub>6</sub> (above F)
- y<sub>4</sub> (above N)
- y<sub>2</sub> (above I)
- y<sub>1</sub> (above R)

Raw file 2015-01-08\_CL04\_Blastomere-15 Scan 30652 Method ITMS; HCD Score 43.6 m/z 482.92

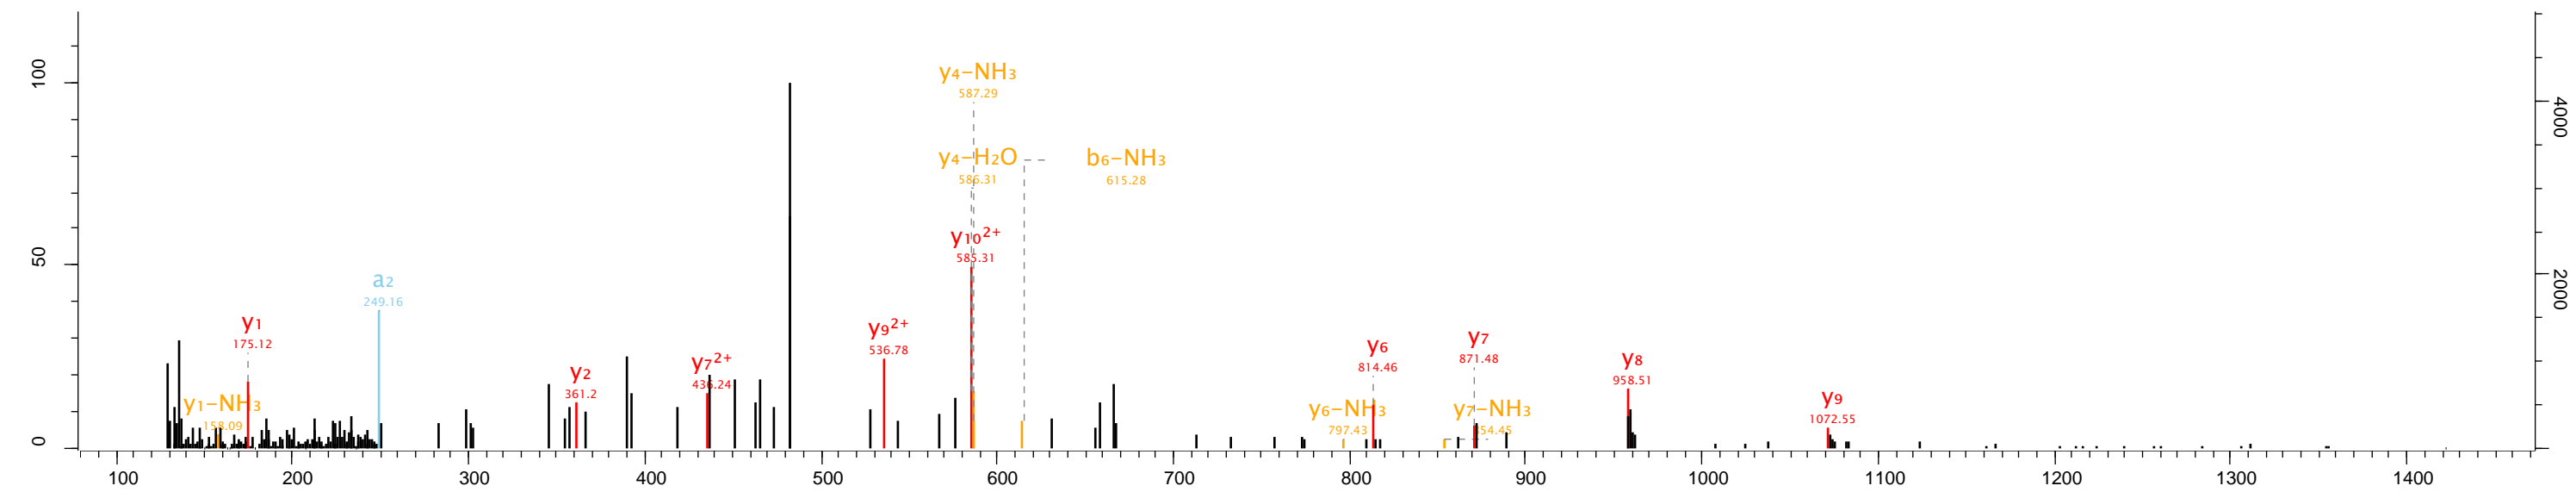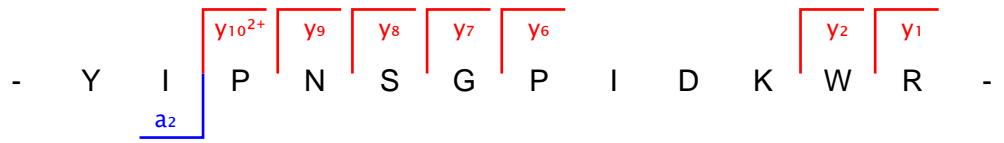

Spectral Annotation for Single-Peptide IDs between Single D11 Cells using Q-OT-LIT

Raw file 2015-01-08\_CL04\_Blastomere-15 Scan 30677 Method ITMS; HCD Score 48.51 m/z 482.59

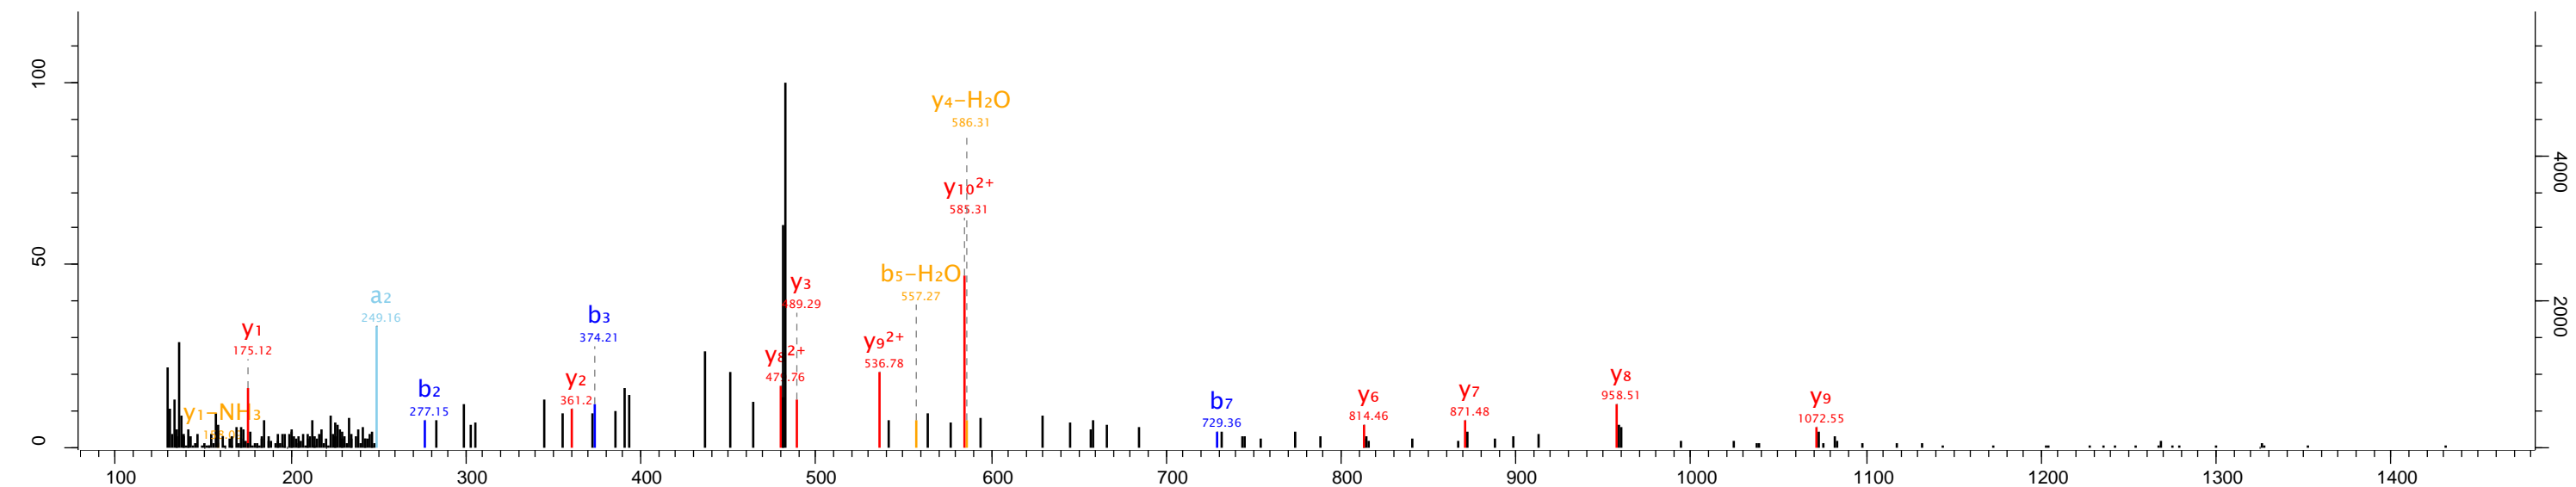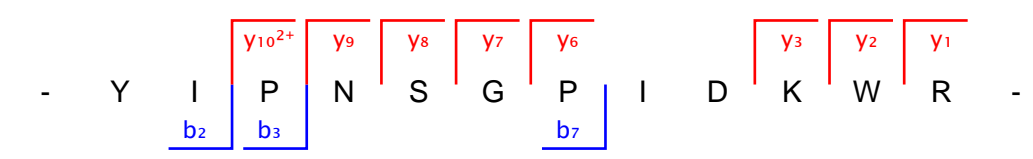

Spectral Annotation for Single-Peptide IDs between Single D11 Cells using Q-OT-LIT

Raw file 2015-01-08\_CL04\_Blastomere-15 Scan 30849 Method ITMS; HCD Score 97.81 m/z 450.92

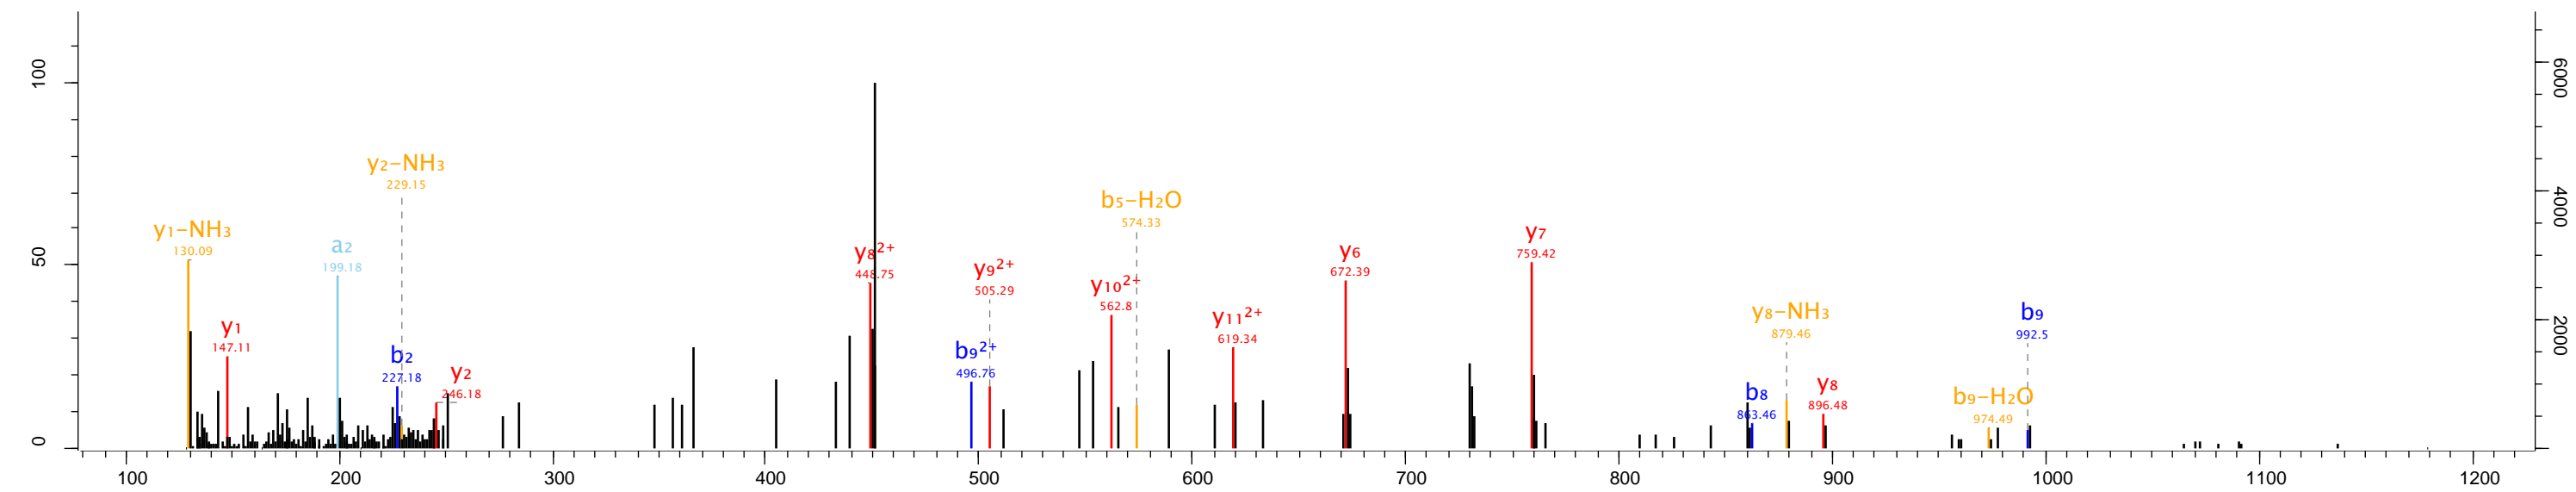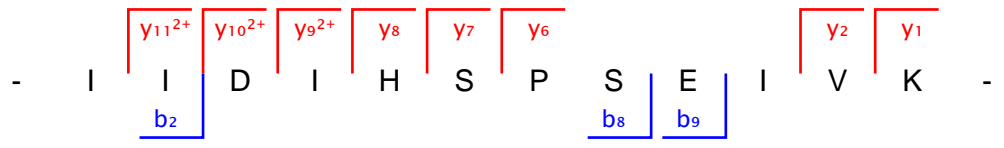

Spectral Annotation for Single-Peptide IDs between Single D11 Cells using Q-OT-LIT

Raw file 2015-01-08\_CL04\_Blastomere-15 Scan 30883 Method ITMS; HCD Score 33.19 m/z 692.73

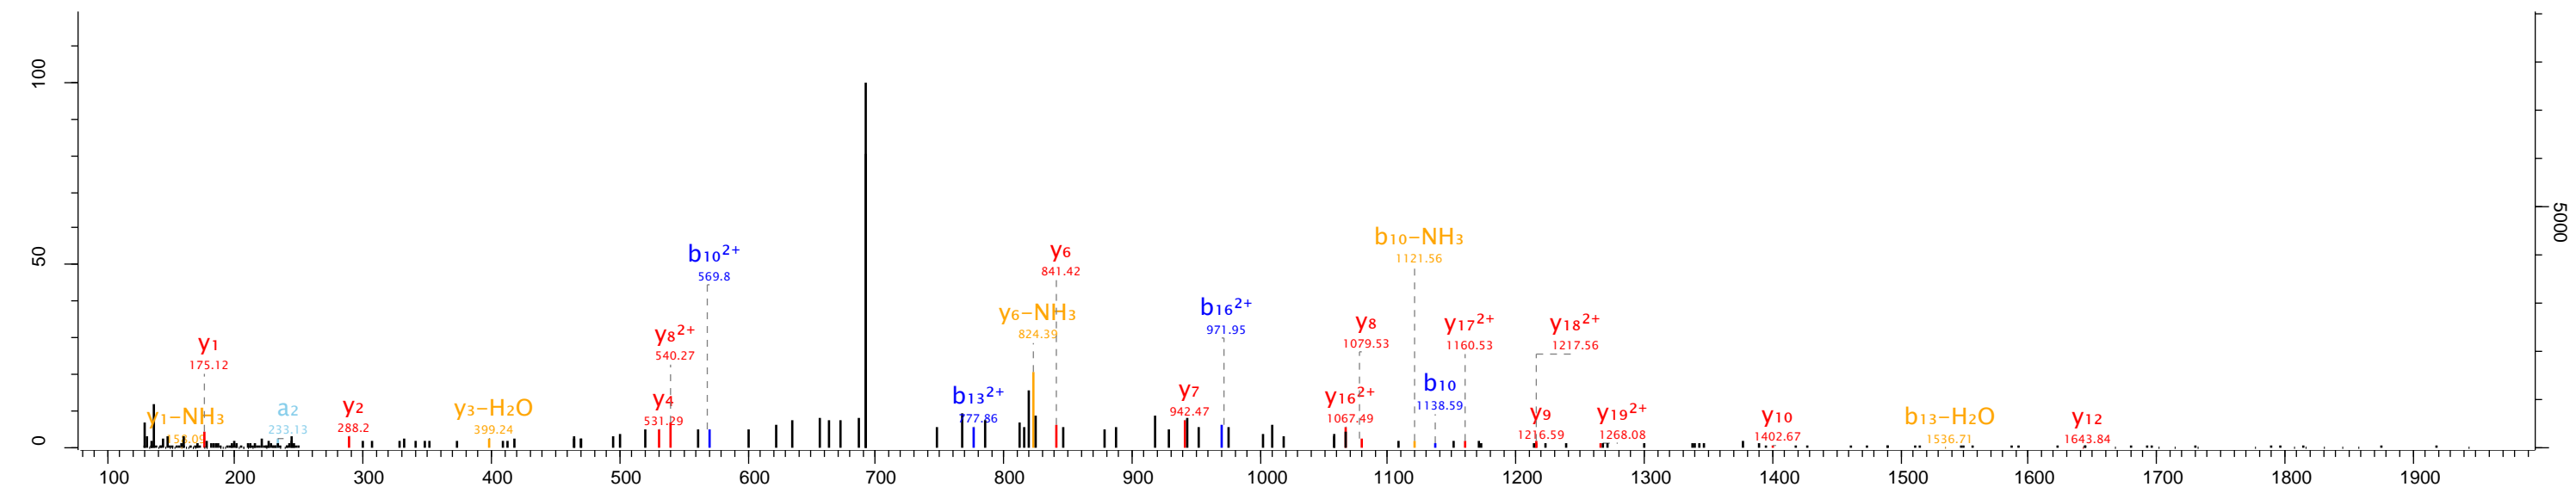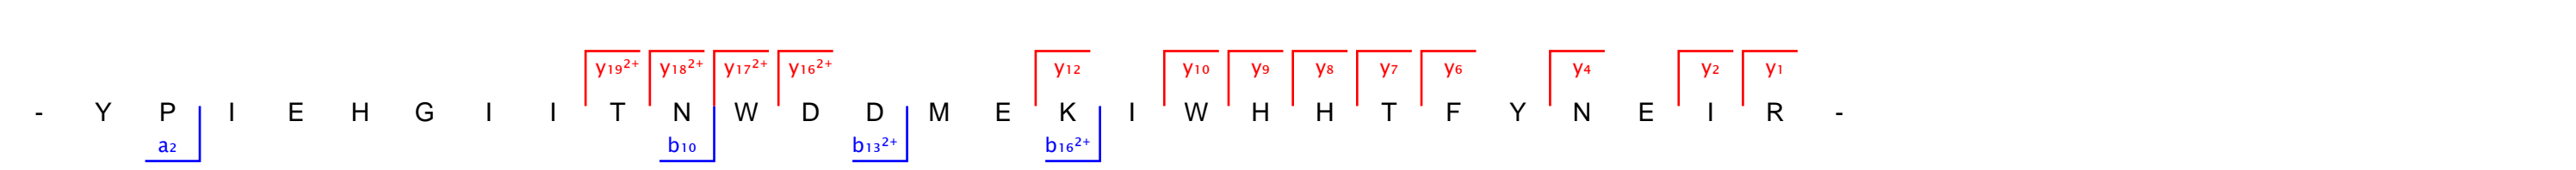

Spectral Annotation for Single-Peptide IDs between Single D11 Cells using Q-OT-LIT

Raw file 2015-01-08\_CL04\_Blastomere-15 Scan 31103 Method ITMS; HCD Score 21.84 m/z 692.53

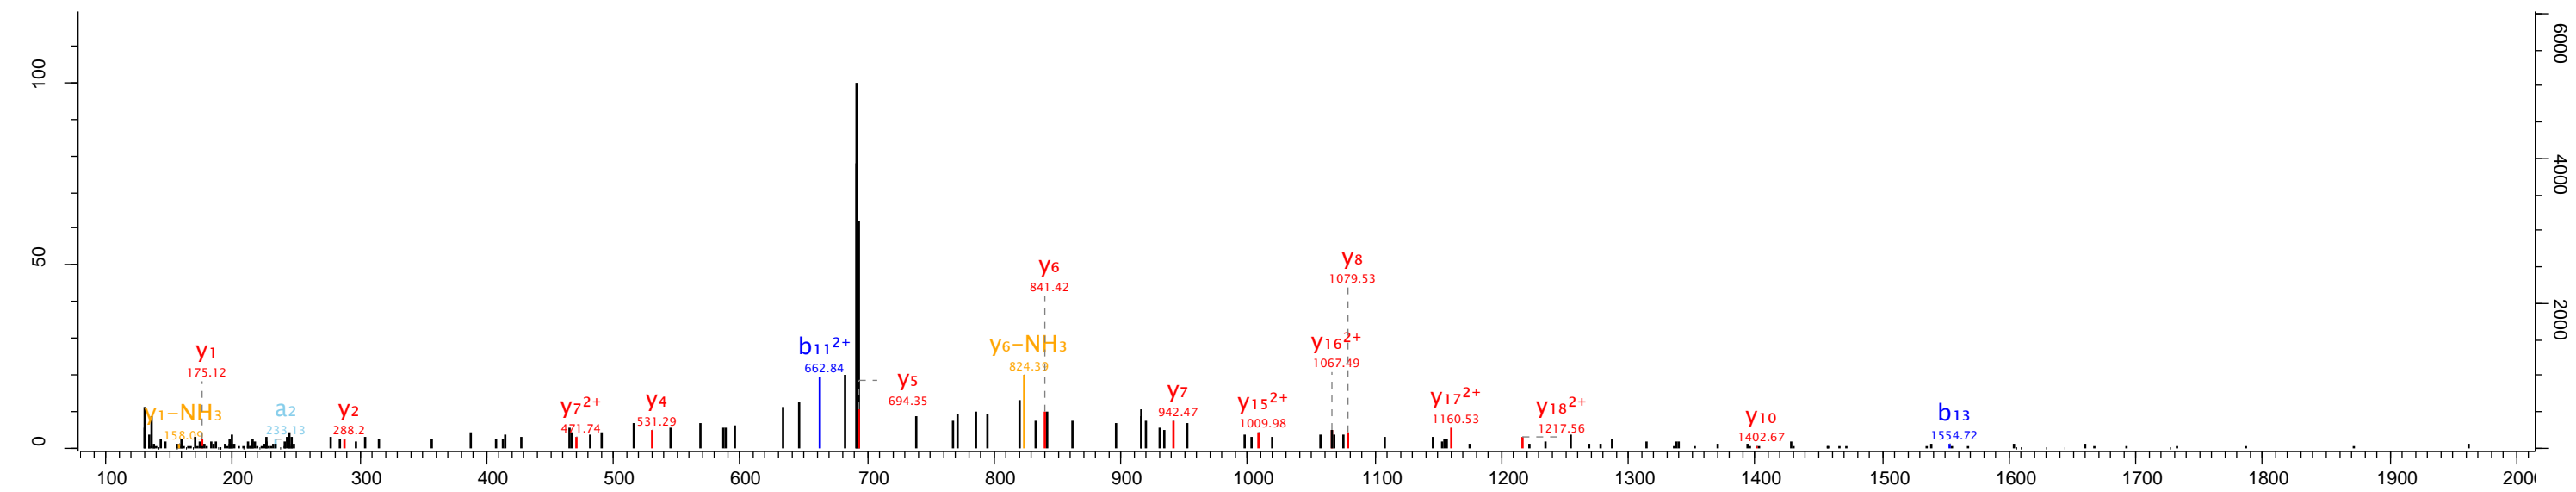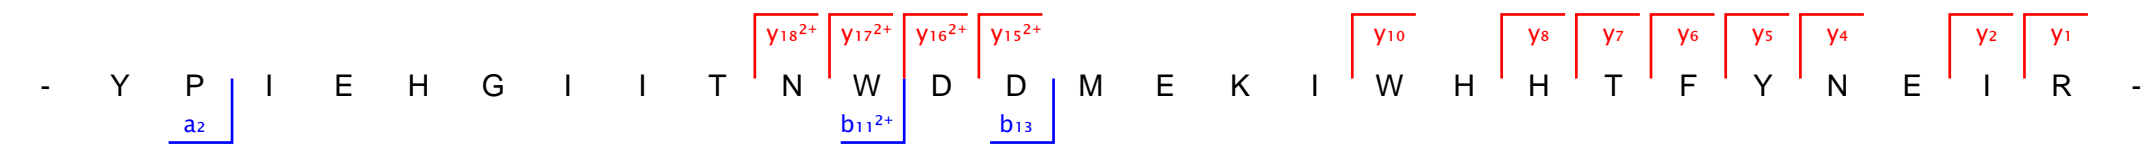

Raw file 2015-01-08\_CL04\_Blastomere-15 Scan 31154 Method ITMS; HCD Score 46.88 m/z 846.65

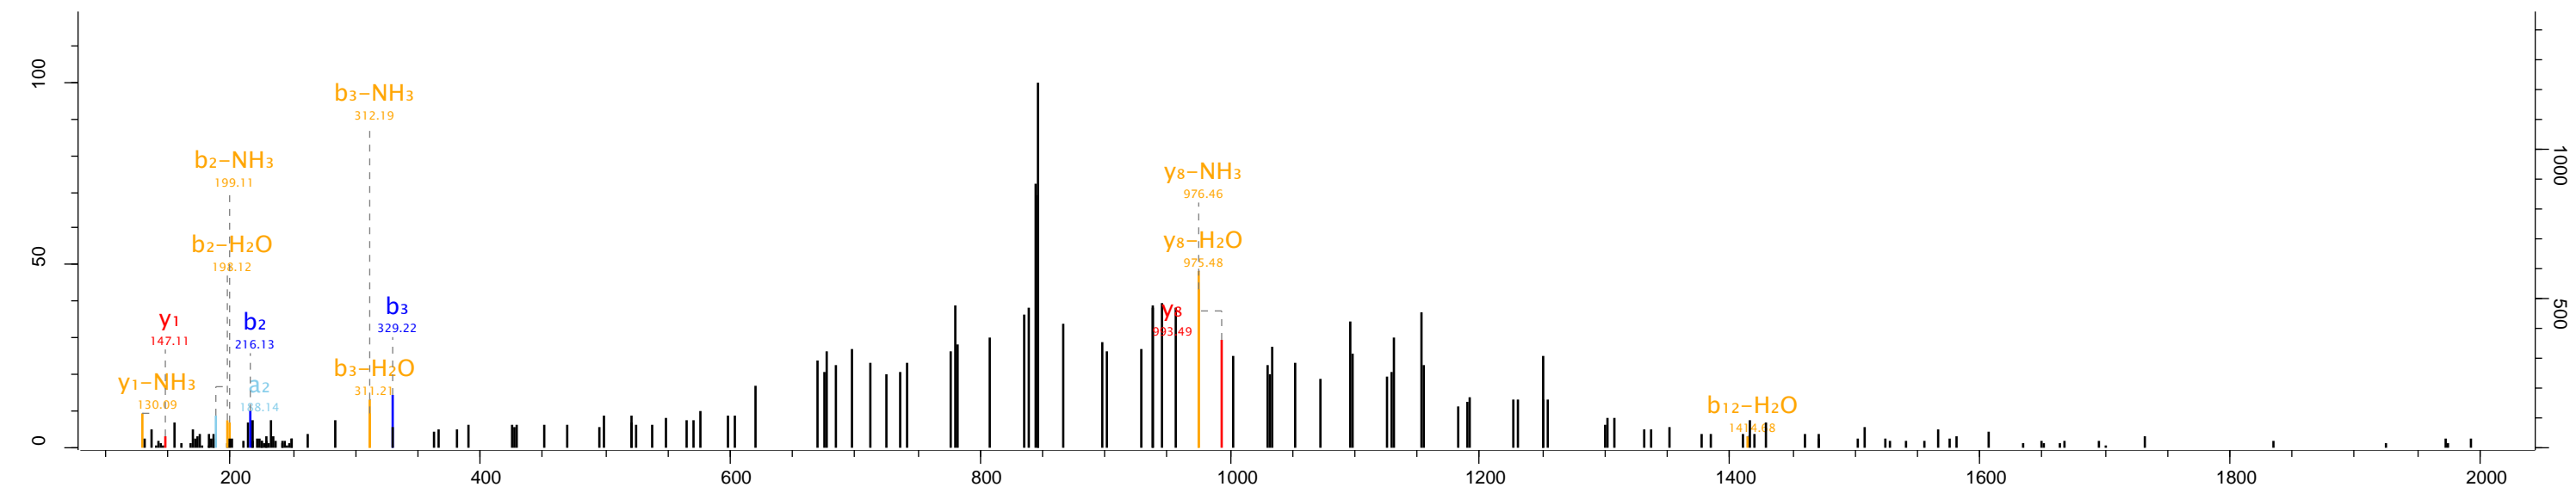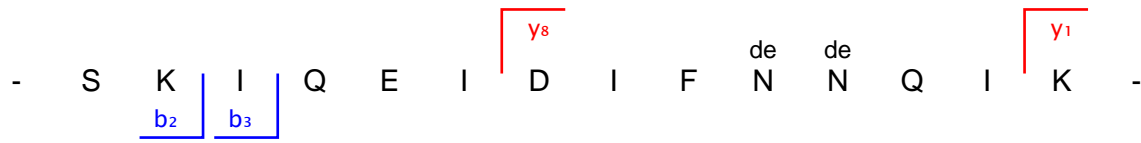

Spectral Annotation for Single-Peptide IDs between Single D11 Cells using Q-OT-LIT

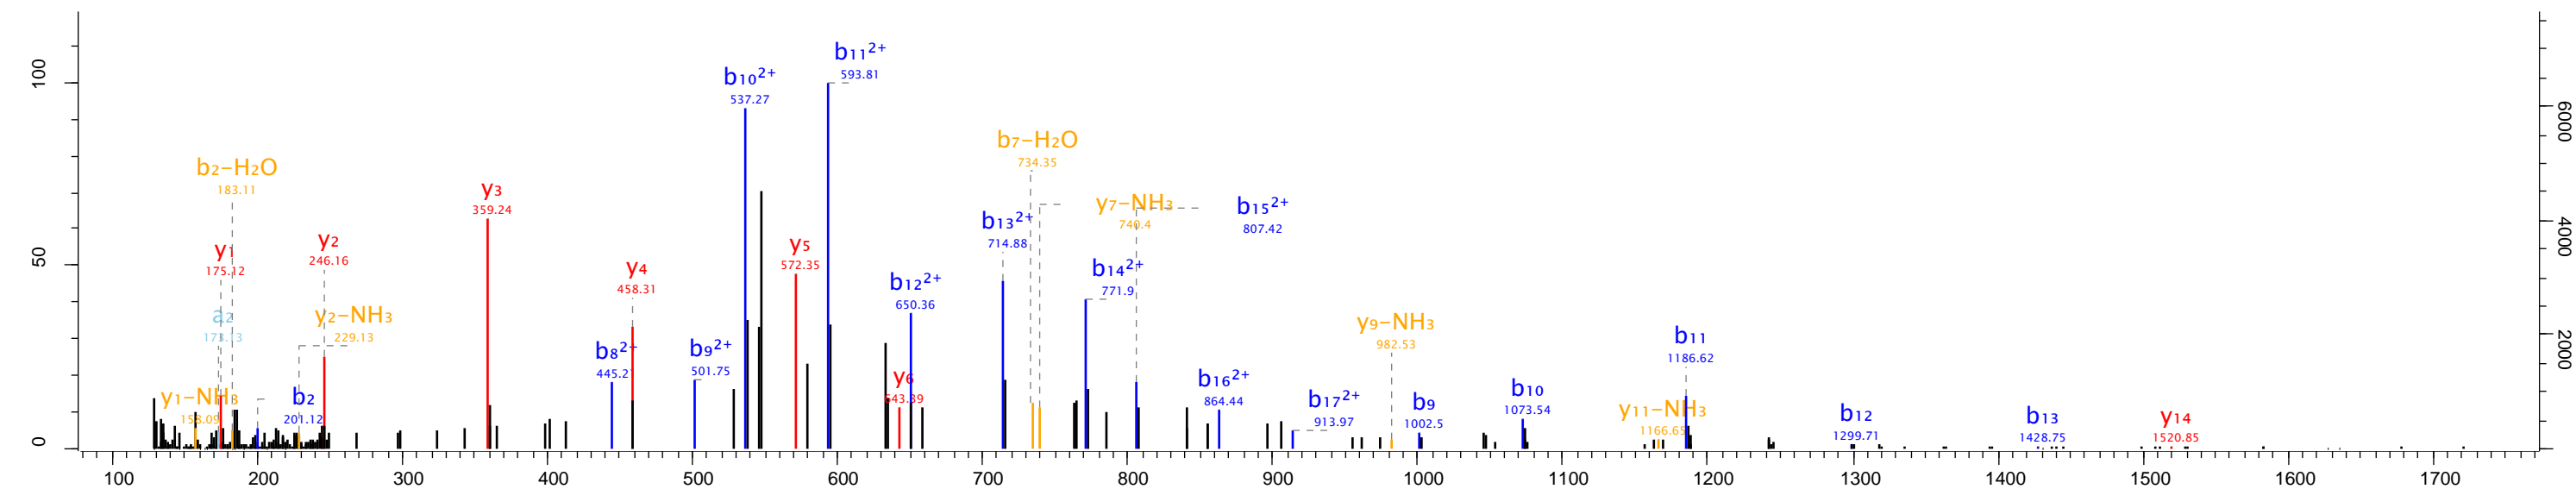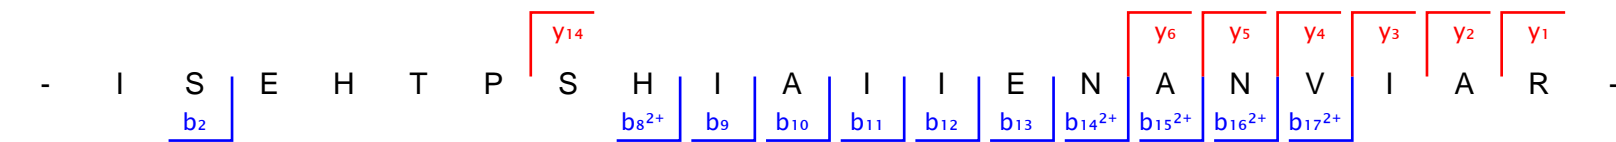



Raw file 2015-01-08\_CL04\_Blastomere-15 Scan 31189 Method ITMS; HCD Score 60.09 m/z 729.39

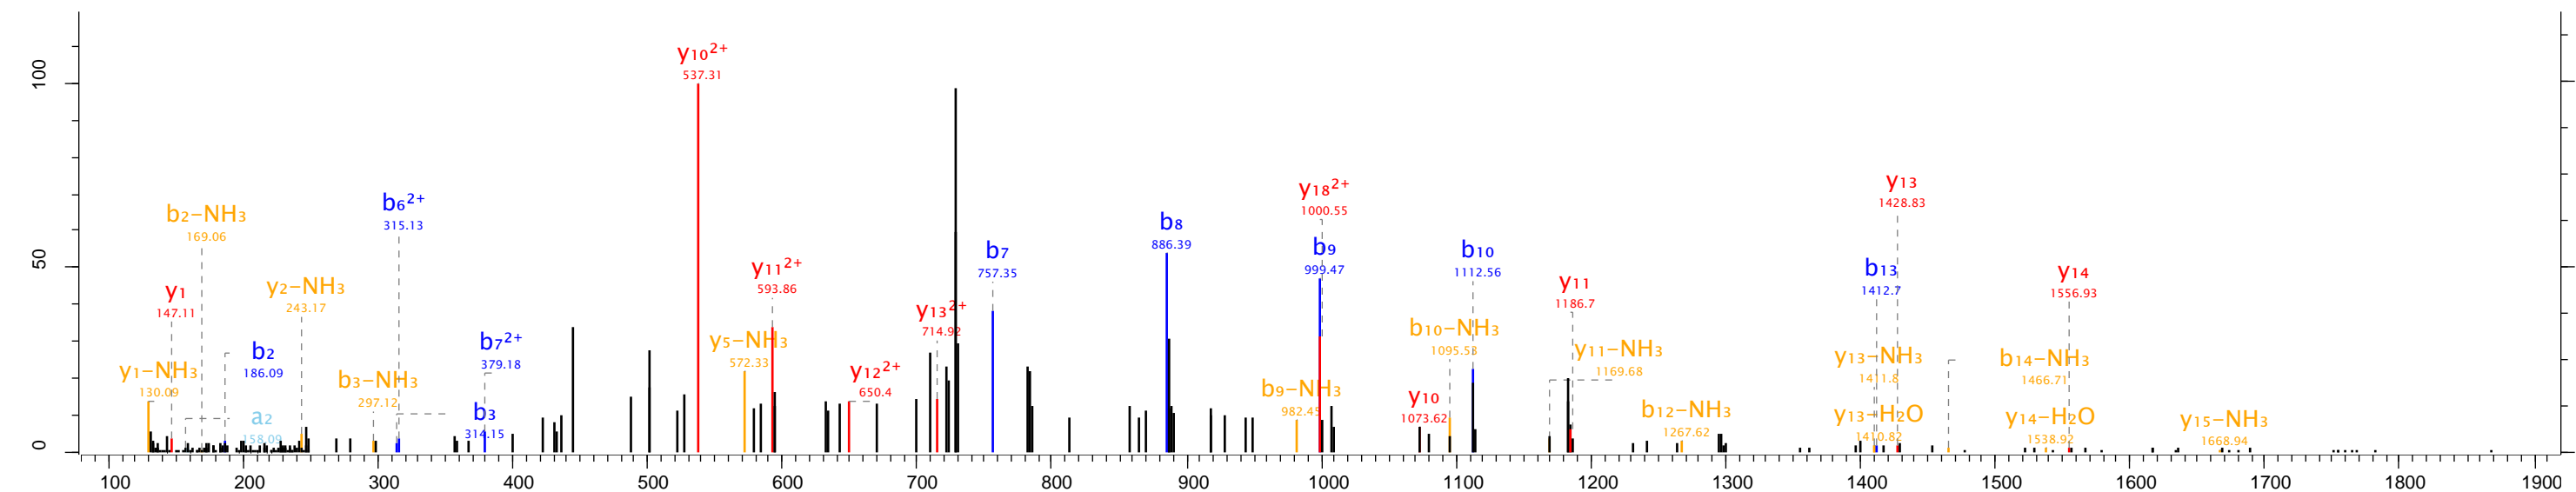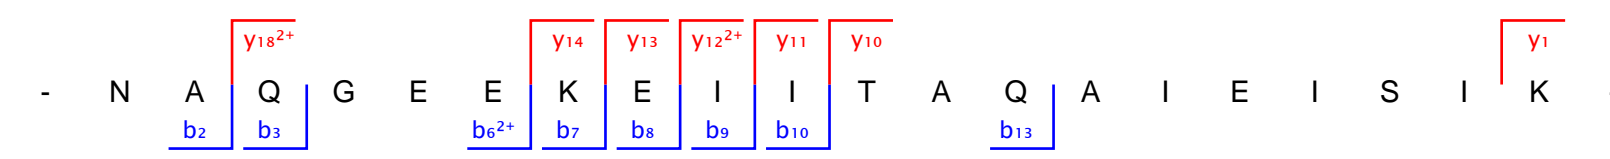

Spectral Annotation for Single-Peptide IDs between Single D11 Cells using Q-OT-LIT

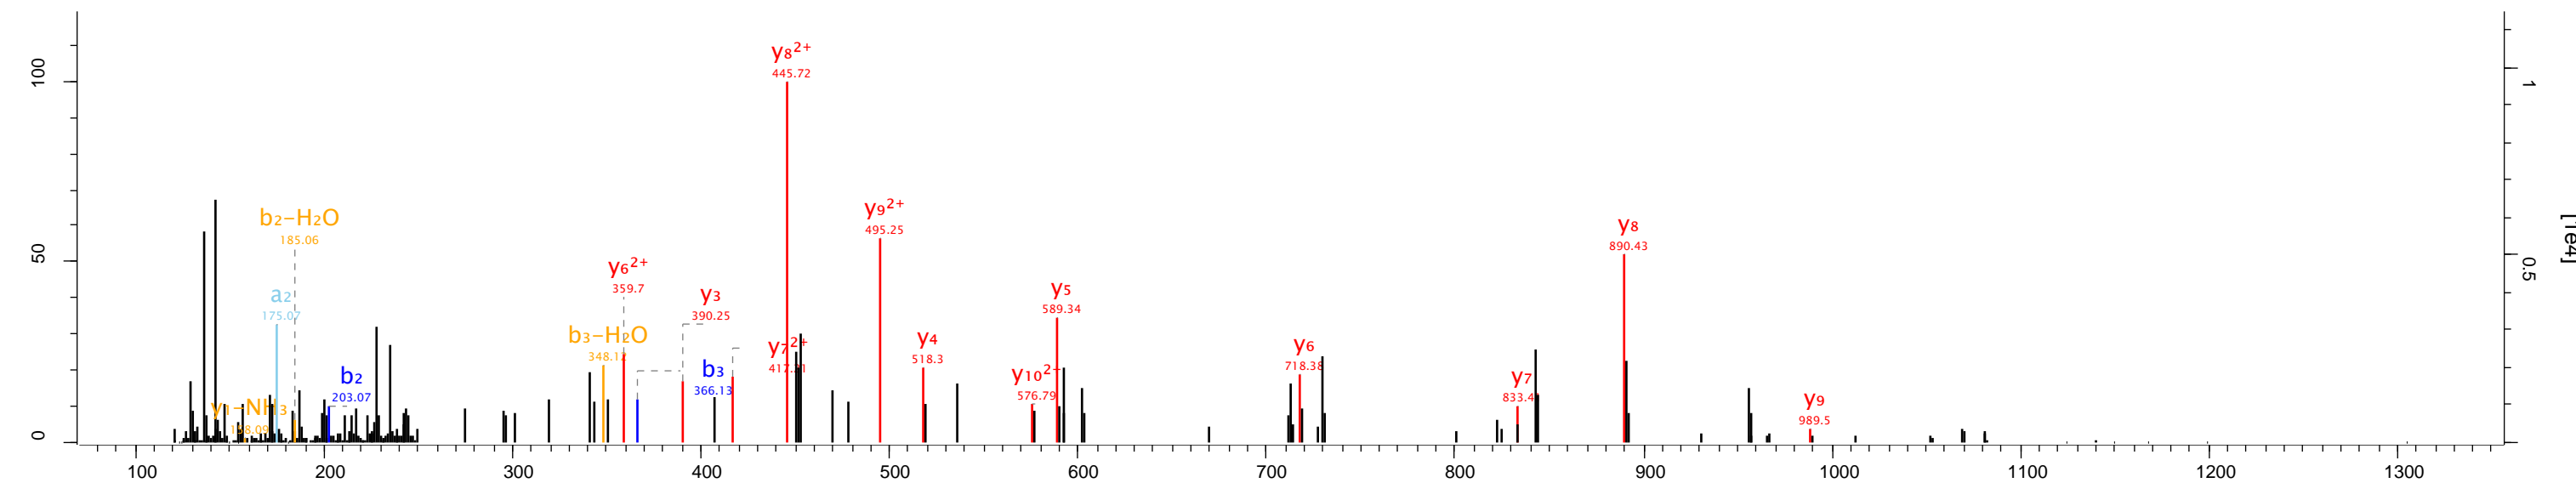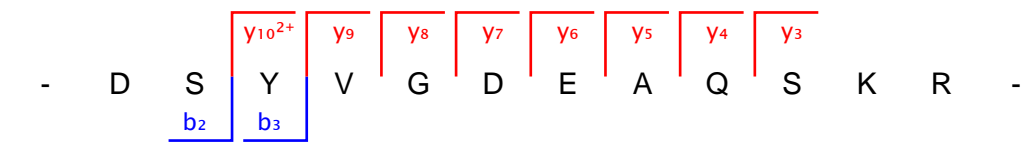

Raw file 2015-01-08\_CL04\_Blastomere-15 Scan 31402 Method ITMS; HCD Score 44.68 m/z 725.4

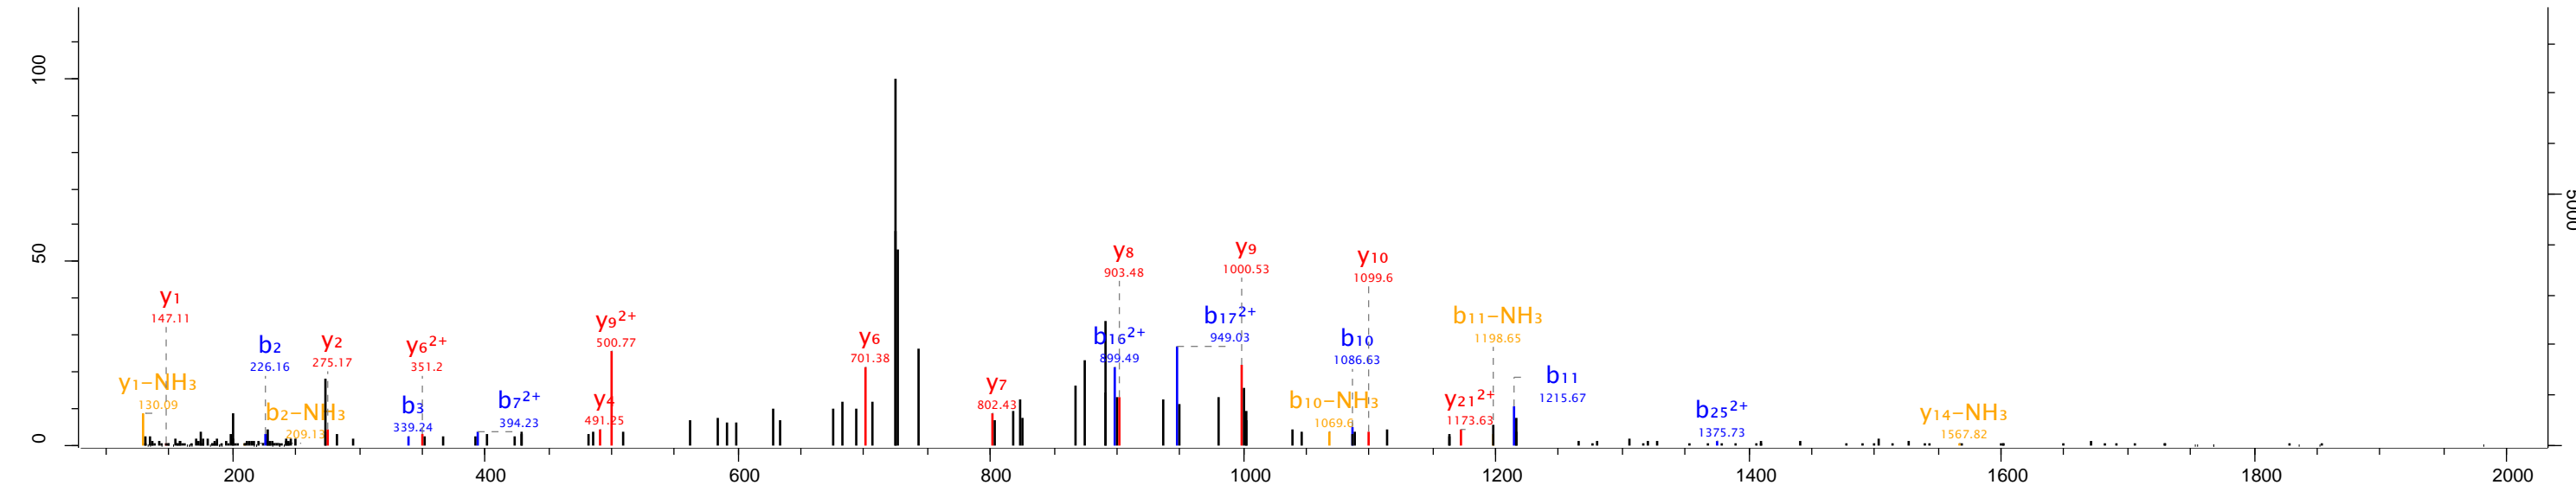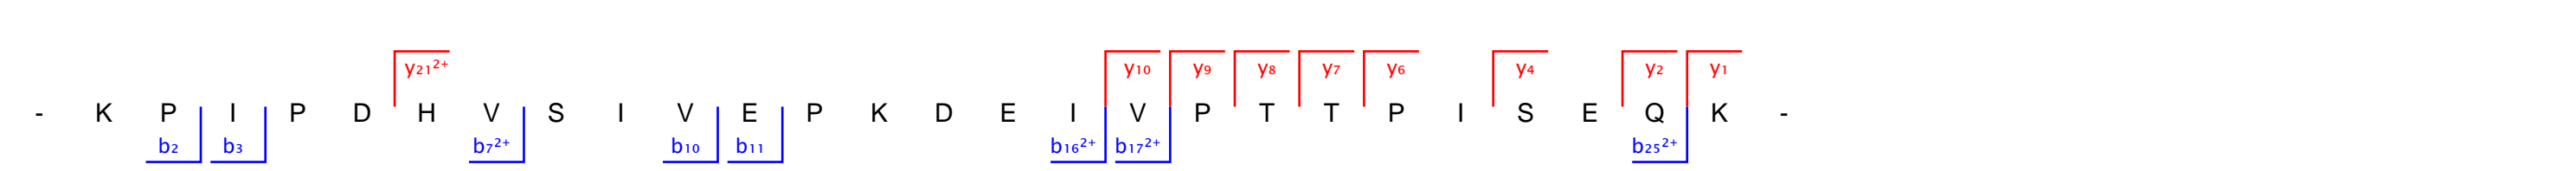

Spectral Annotation for Single-Peptide IDs between Single D11 Cells using Q-OT-LIT

Raw file 2015-01-08\_CL04\_Blastomere-15 Scan 31510 Method ITMS; HCD Score 111.27 m/z 489.26

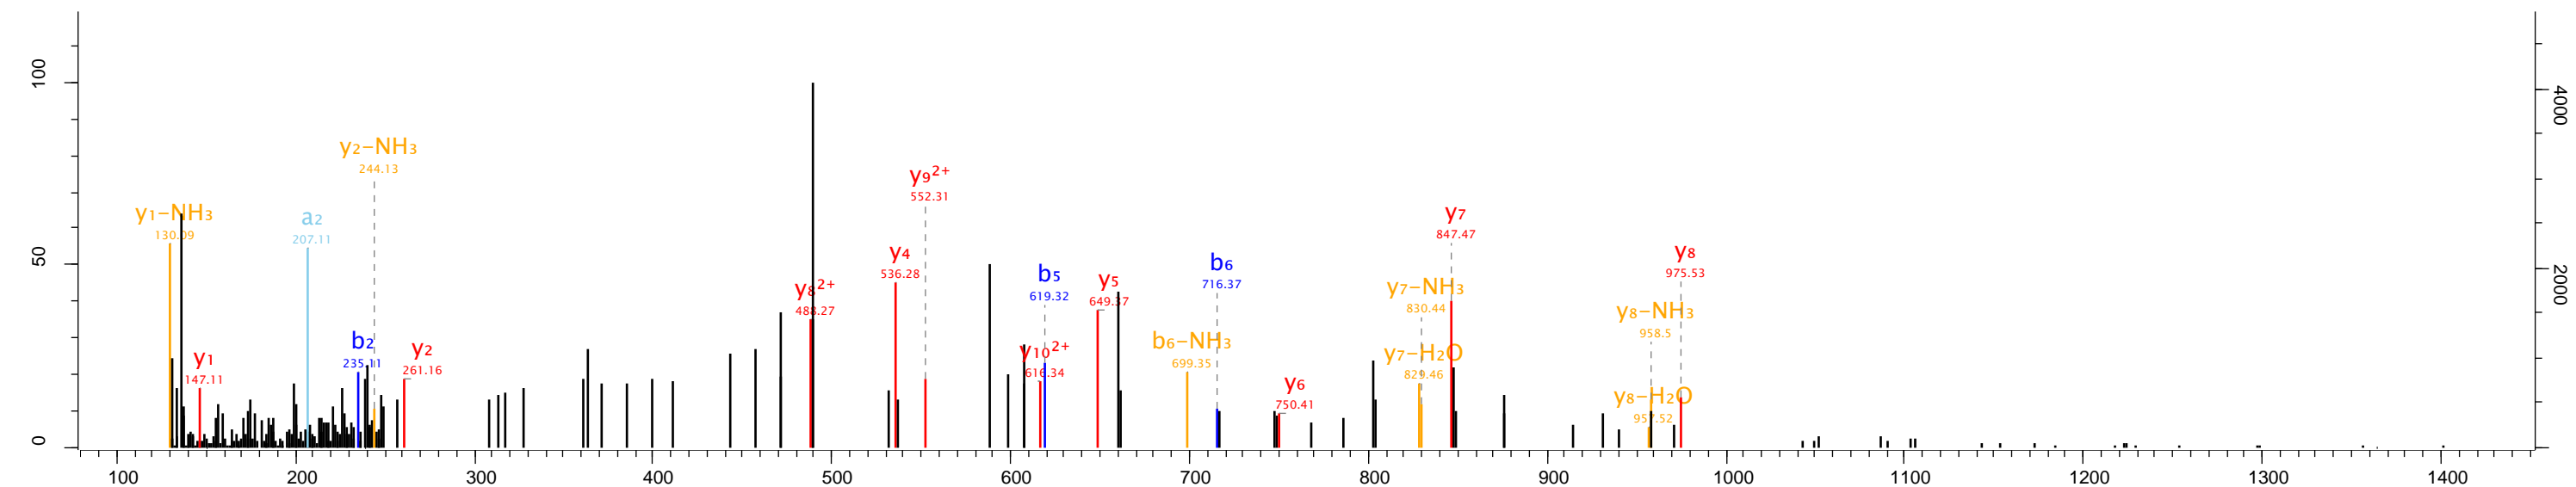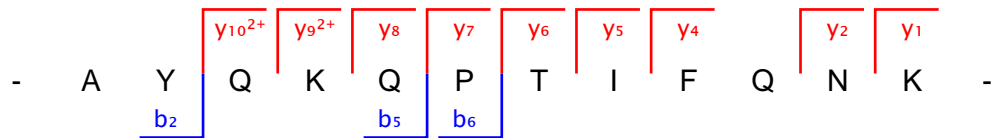

Spectral Annotation for Single-Peptide IDs between Single D11 Cells using Q-OT-LIT

Raw file 2015-01-08\_CL04\_Blastomere-15 Scan 31550 Method ITMS; HCD Score 89.56 m/z 489.26

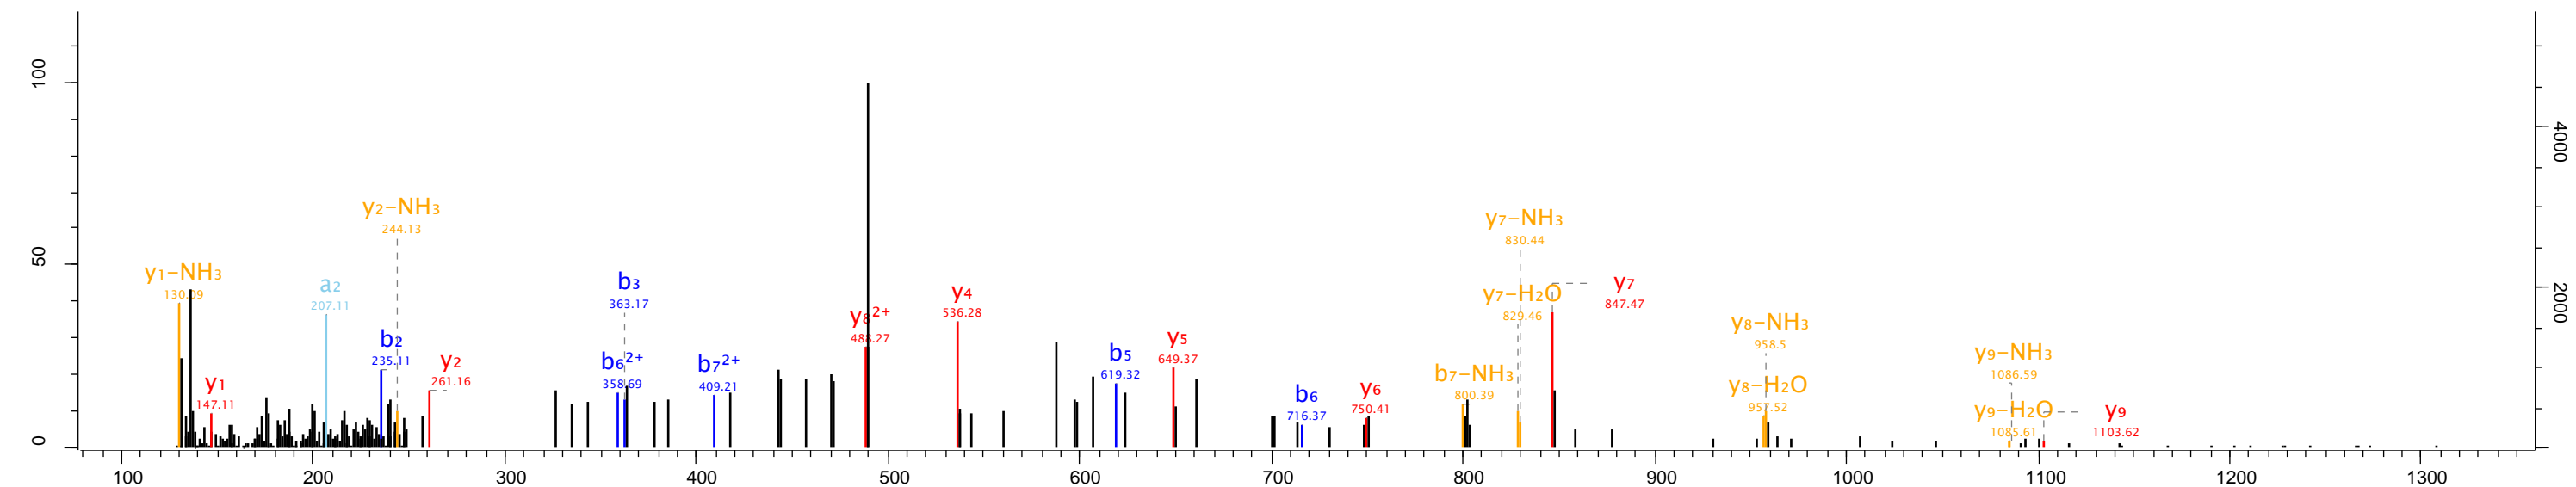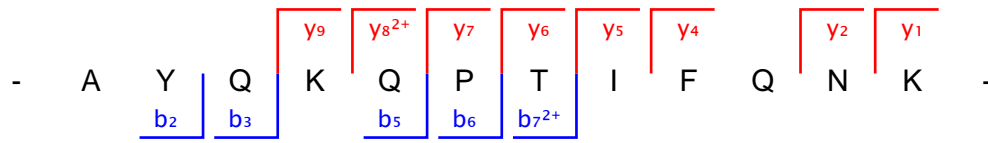

Spectral Annotation for Single-Peptide IDs between Single D11 Cells using Q-OT-LIT

Raw file 2015-01-08\_CL04\_Blastomere-15 Scan 31572 Method ITMS; HCD Score 61.24 m/z 489.26

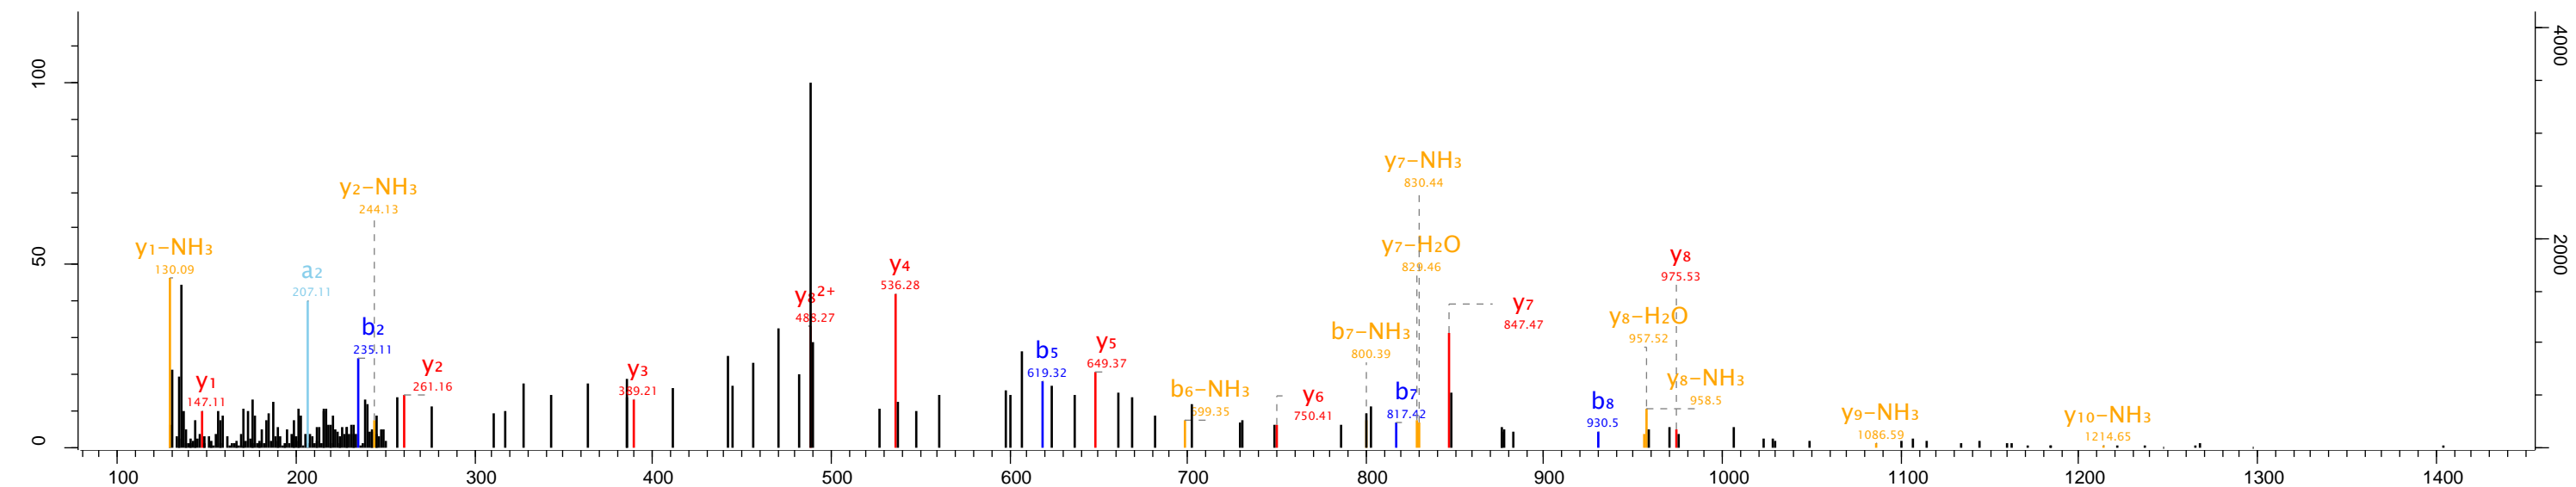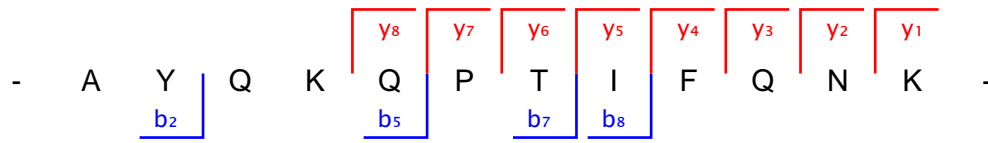

Spectral Annotation for Single-Peptide IDs between Single D11 Cells using Q-OT-LIT

Raw file 2015-01-08\_CL04\_Blastomere-15 Scan 31666 Method ITMS; HCD Score 52.07 m/z 677.81

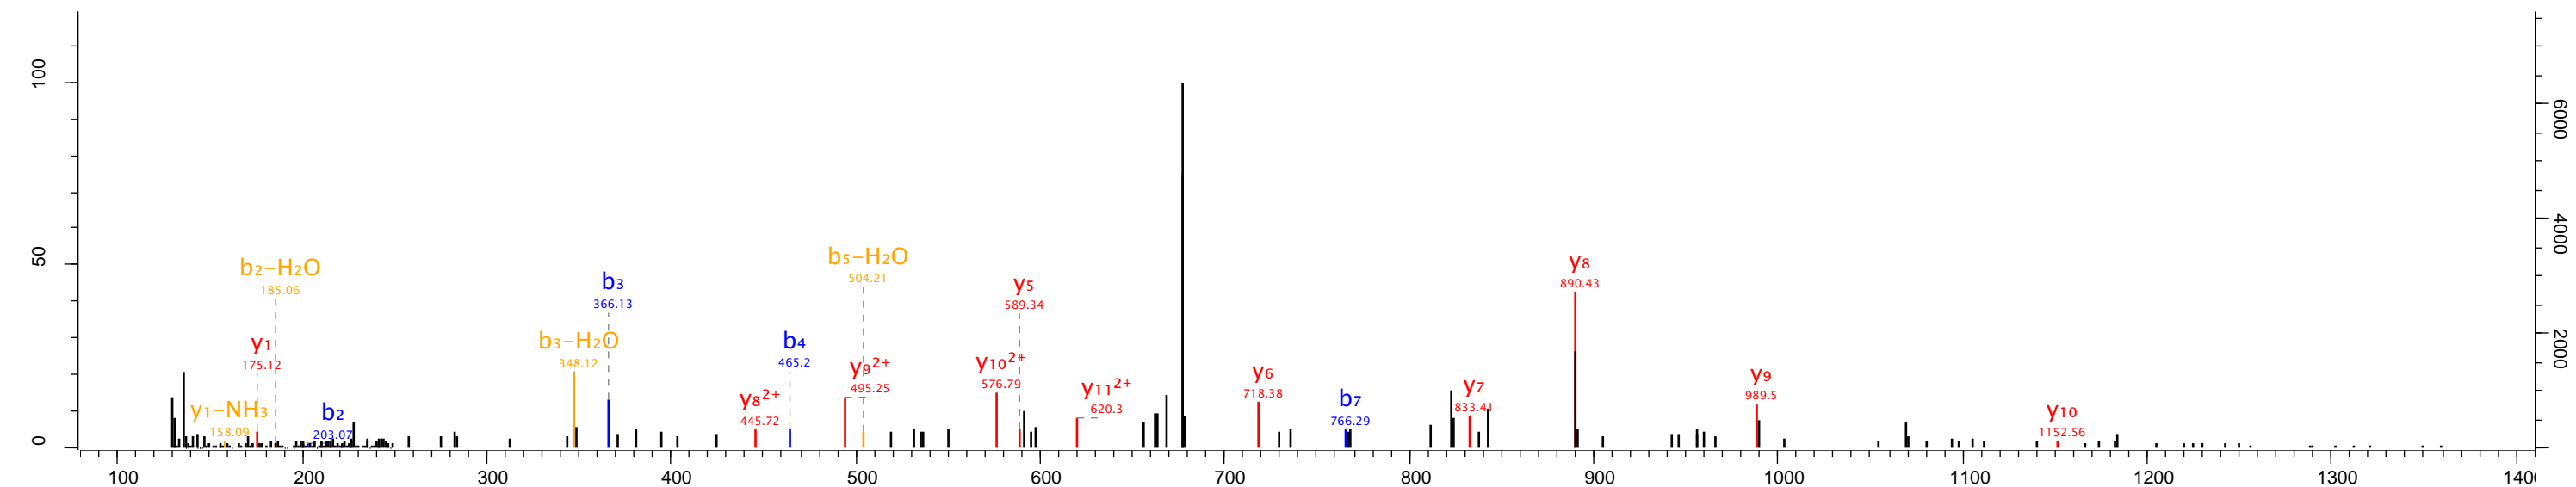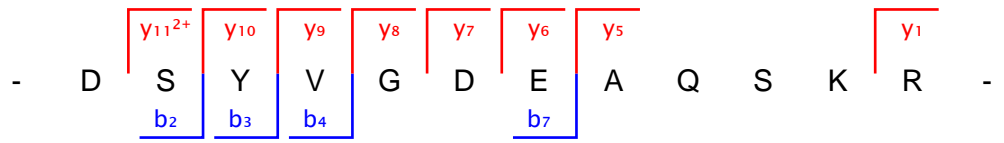

Spectral Annotation for Single-Peptide IDs between Single D11 Cells using Q-OT-LIT

Raw file 2015-01-08\_CL04\_Blastomere-15 Scan 31986 Method ITMS; HCD Score 89.51 m/z 564.97

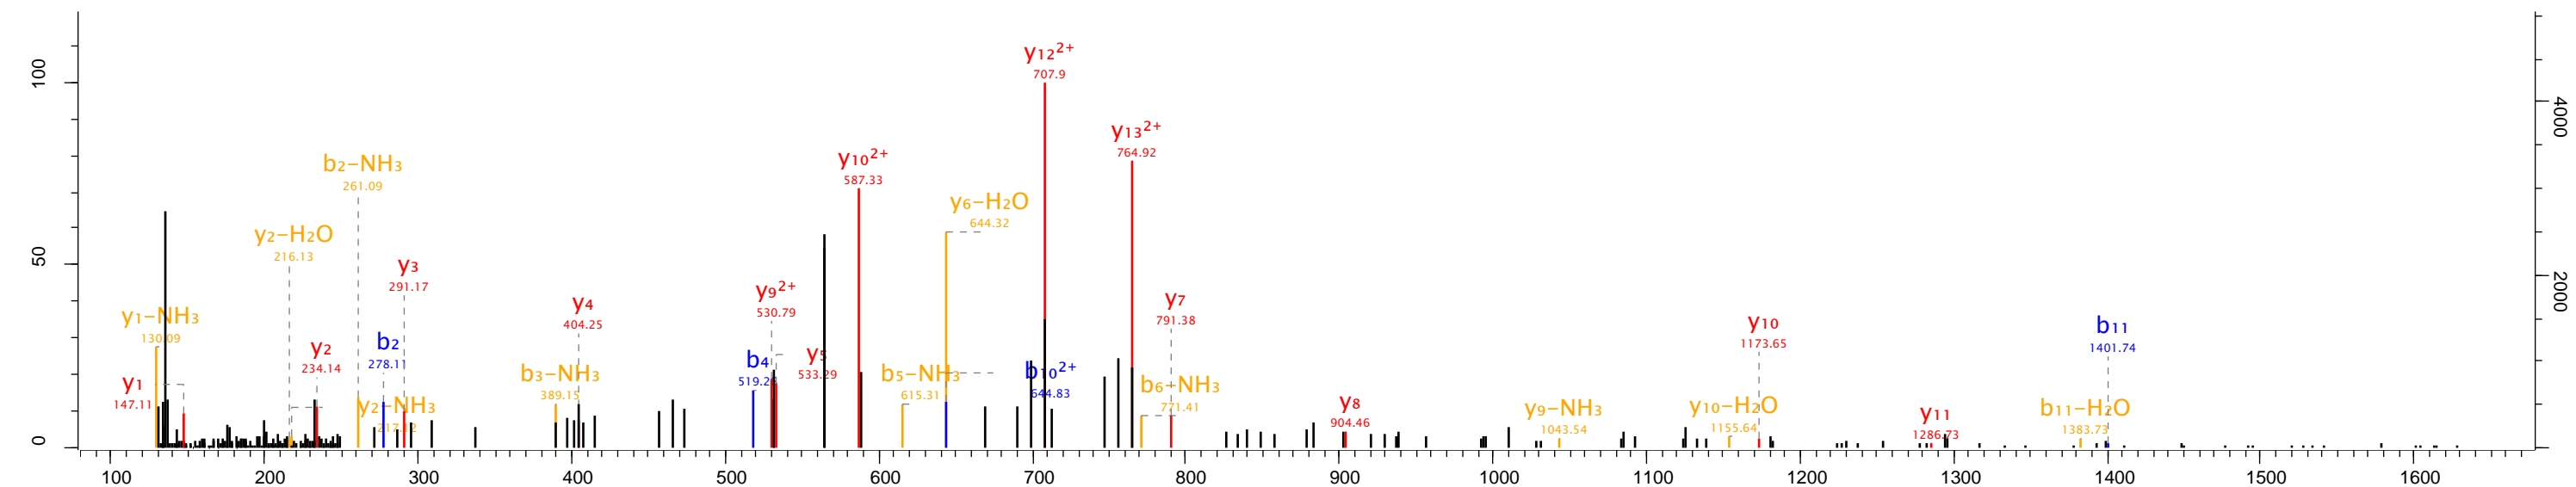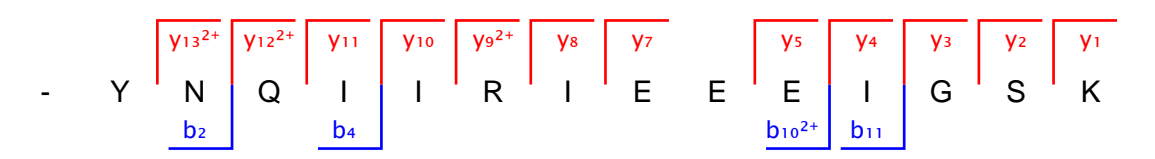

Spectral Annotation for Single-Peptide IDs between Single D11 Cells using Q-OT-LIT



Raw file 2015-01-08\_CL04\_Blastomere-15 Scan 32008 Method ITMS; HCD Score 100.73 m/z 564.63

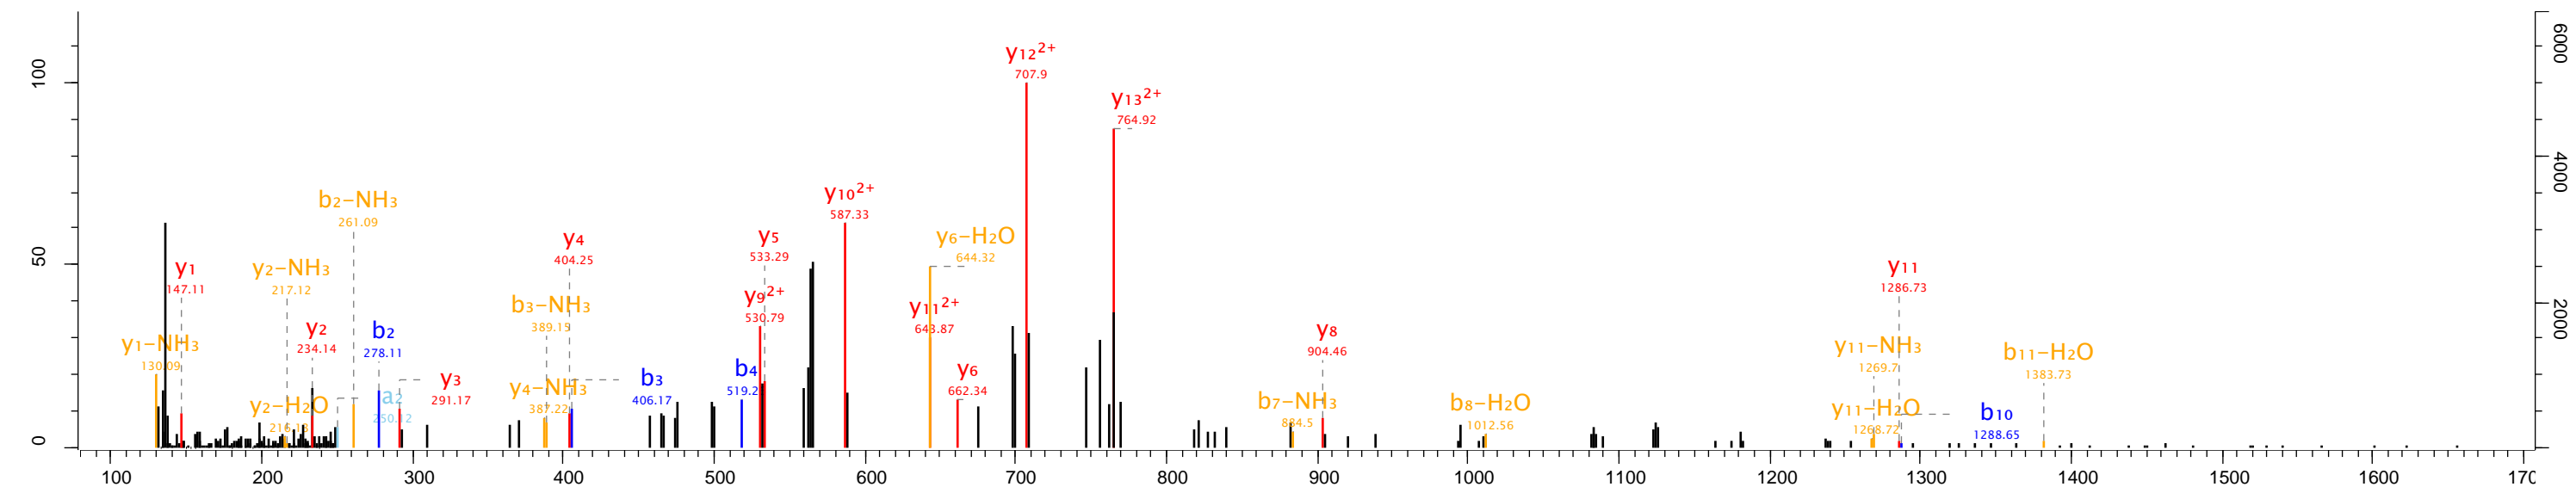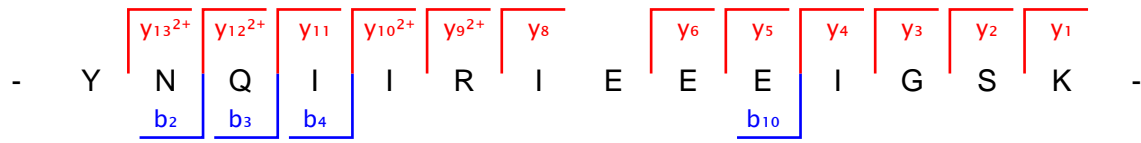

Spectral Annotation for Single-Peptide IDs between Single D11 Cells using Q-OT-LIT

Raw file 2015-01-08\_CL04\_Blastomere-15 Scan 32010 Method ITMS; HCD Score 62.8 m/z 489.26

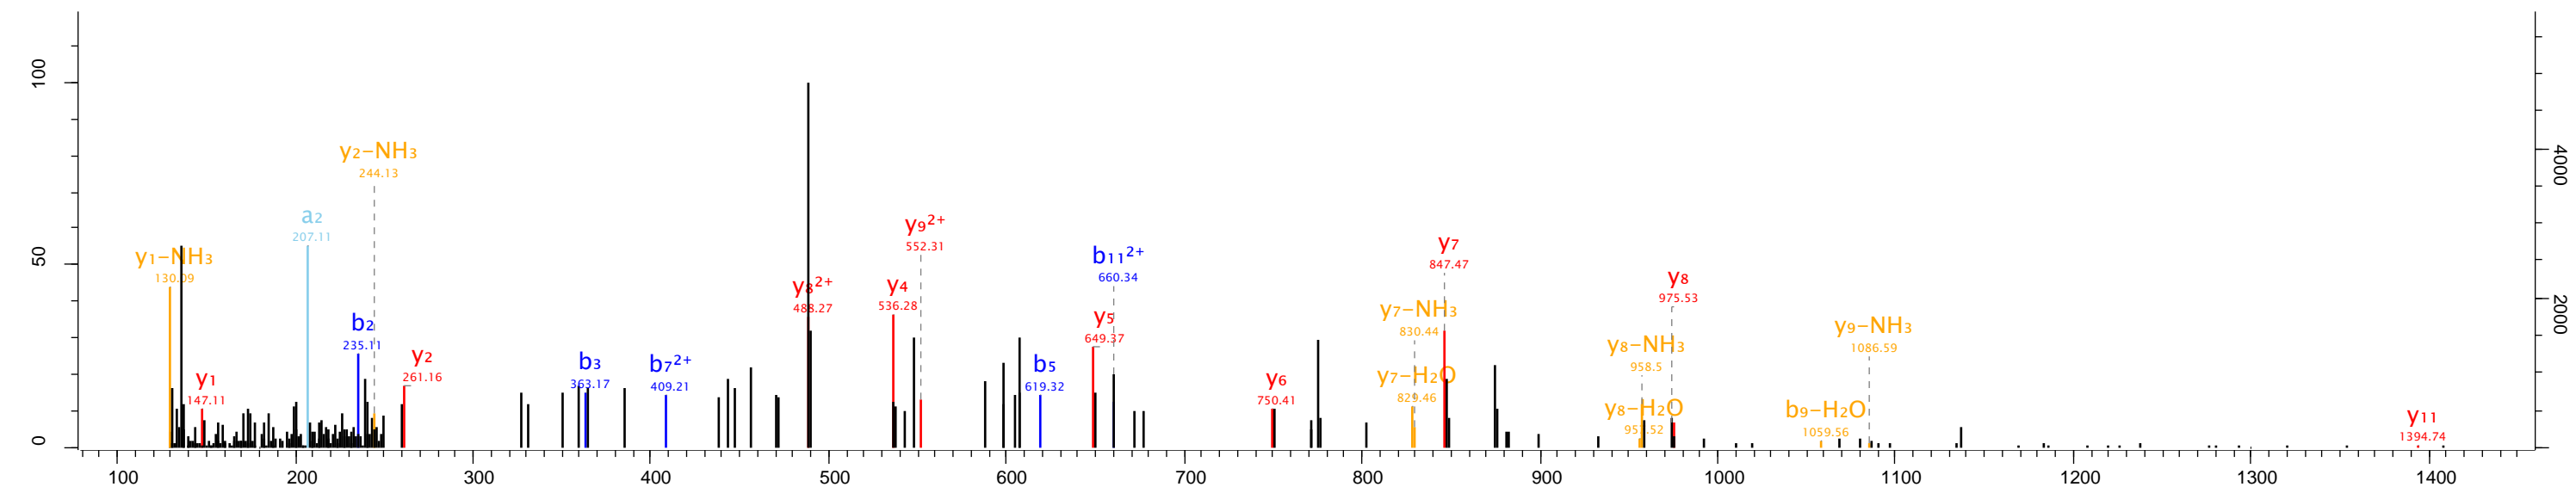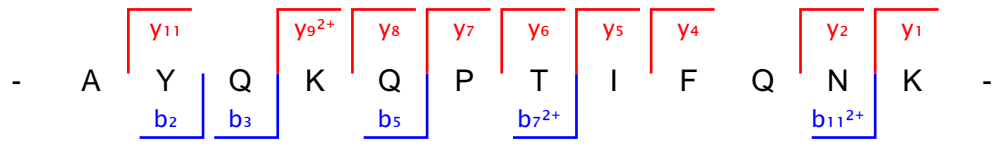

Spectral Annotation for Single-Peptide IDs between Single D11 Cells using Q-OT-LIT

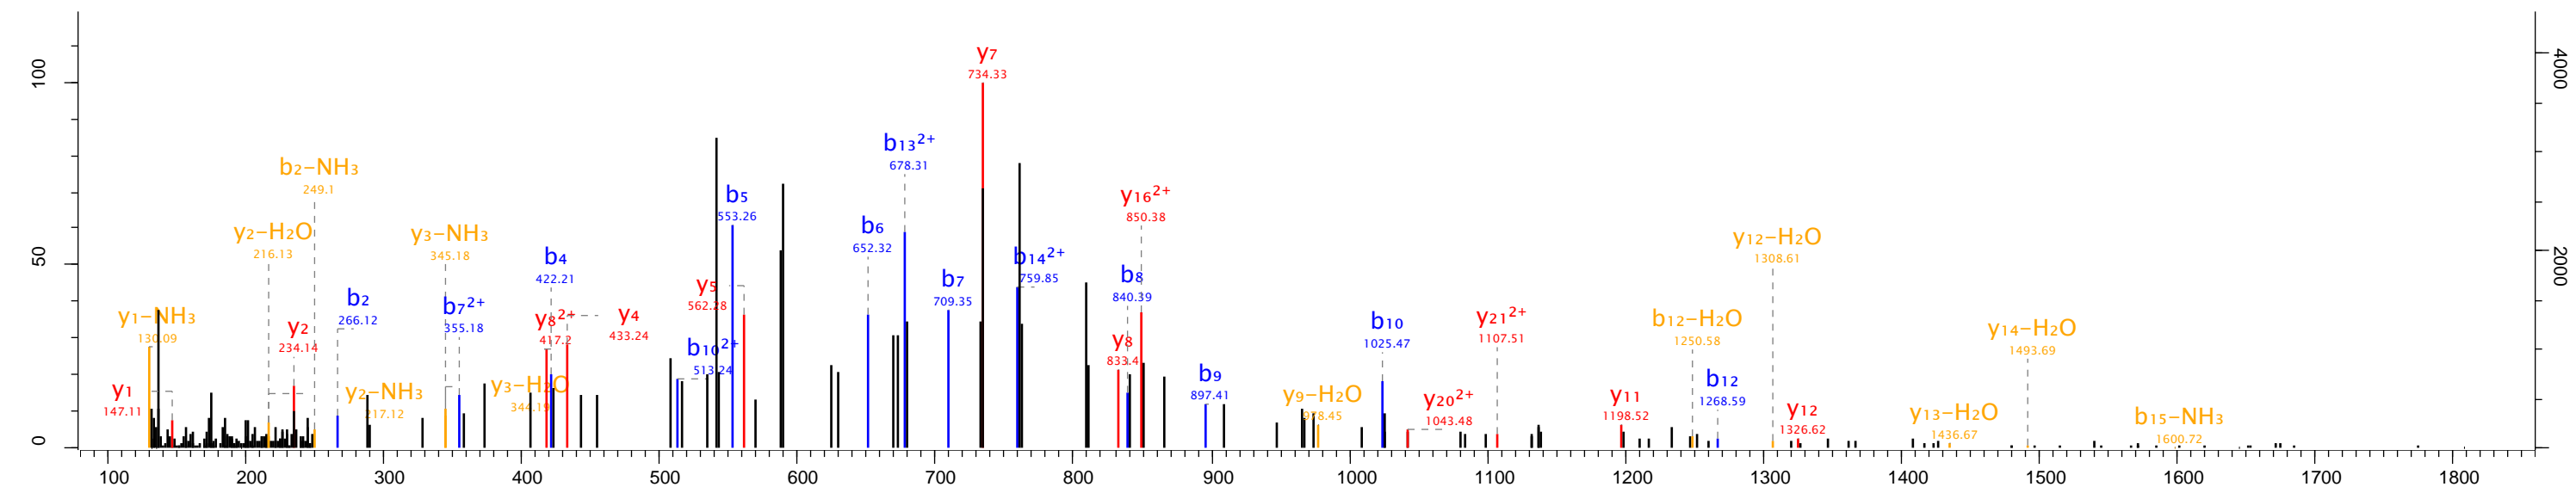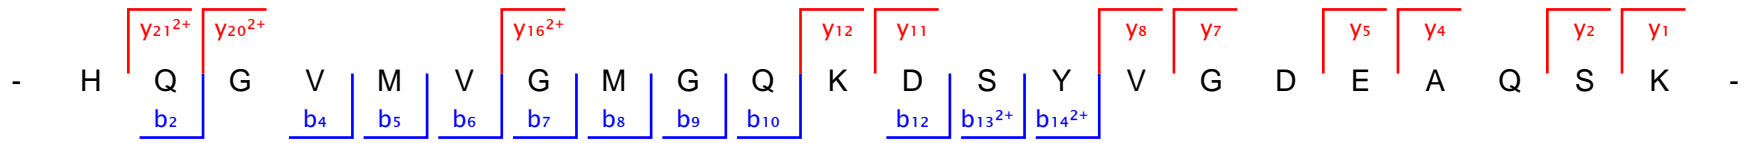

Spectral Annotation for Single-Peptide IDs between Single D11 Cells using Q-OT-LIT

Raw file 2015-01-08\_CL04\_Blastomere-15 Scan 32072 Method ITMS; HCD Score 80.11 m/z 588.77

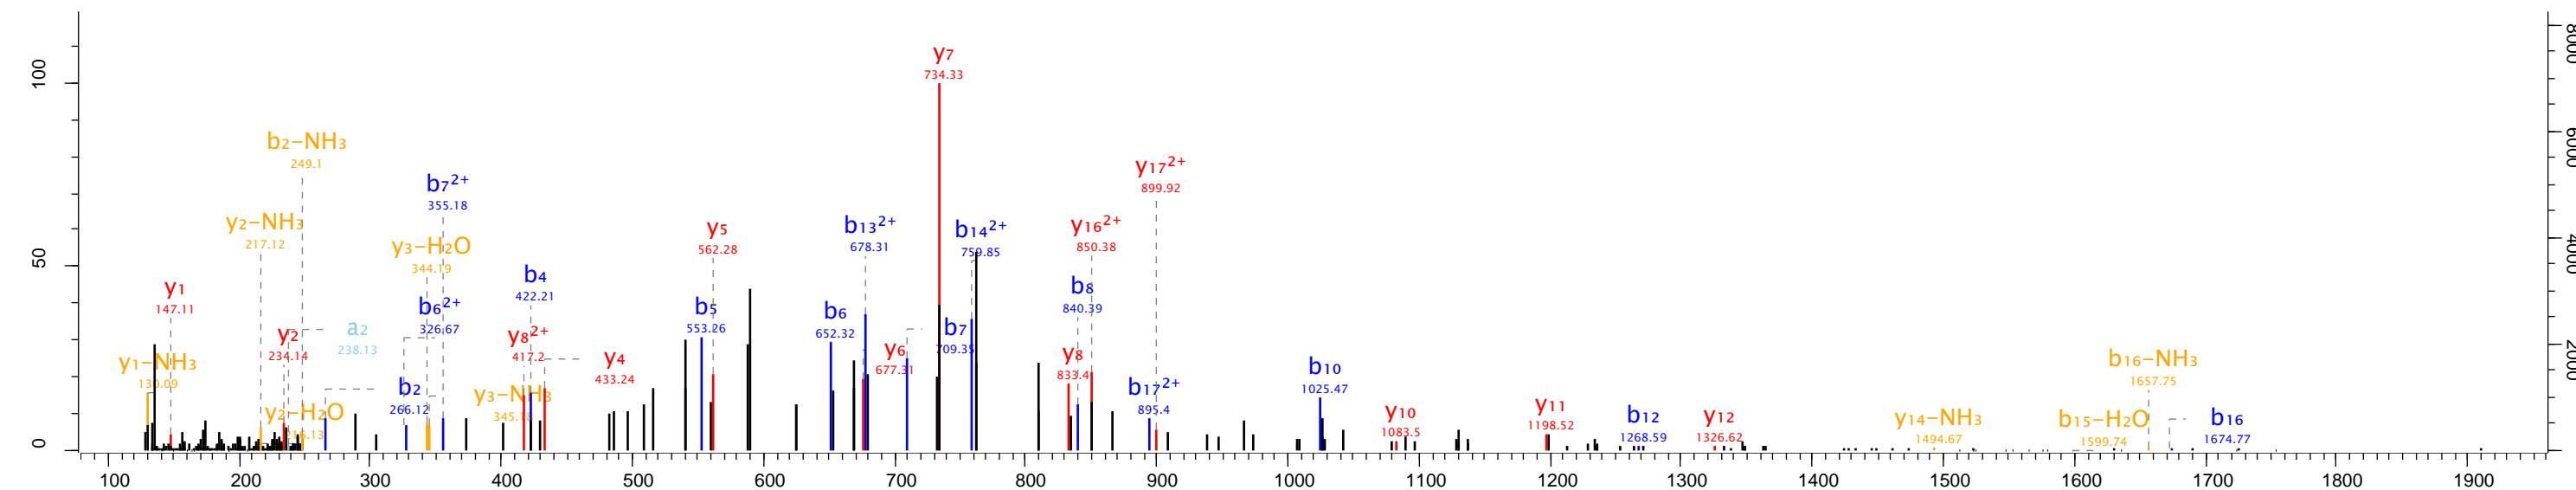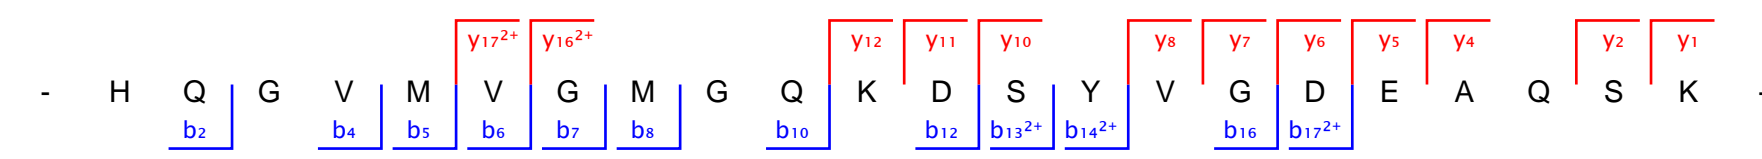

Spectral Annotation for Single-Peptide IDs between Single D11 Cells using Q-OT-LIT

Raw file 2015-01-08\_CL04\_Blastomere-15 Scan 32085 Method ITMS; HCD Score 86.36 m/z 588.52

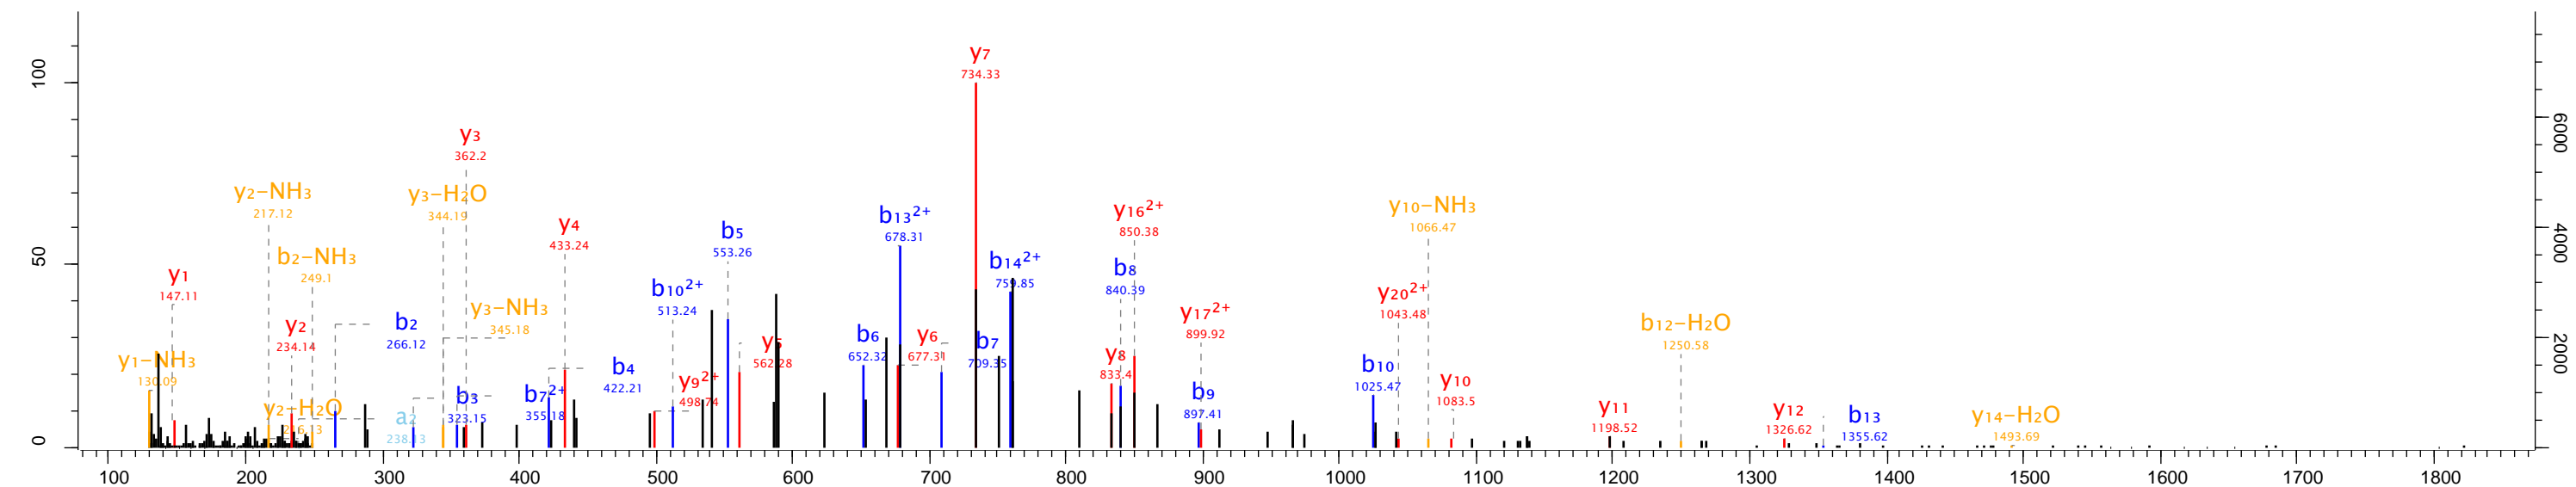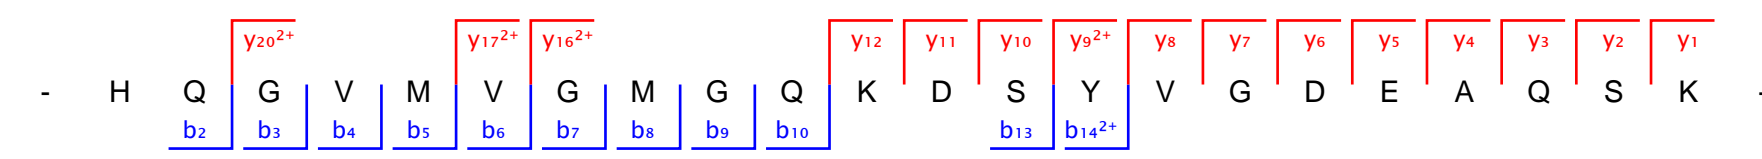

Spectral Annotation for Single-Peptide IDs between Single D11 Cells using Q-OT-LIT

Raw file 2015-01-08\_CL04\_Blastomere-15 Scan 32106 Method ITMS; HCD Score 84.21 m/z 634.57

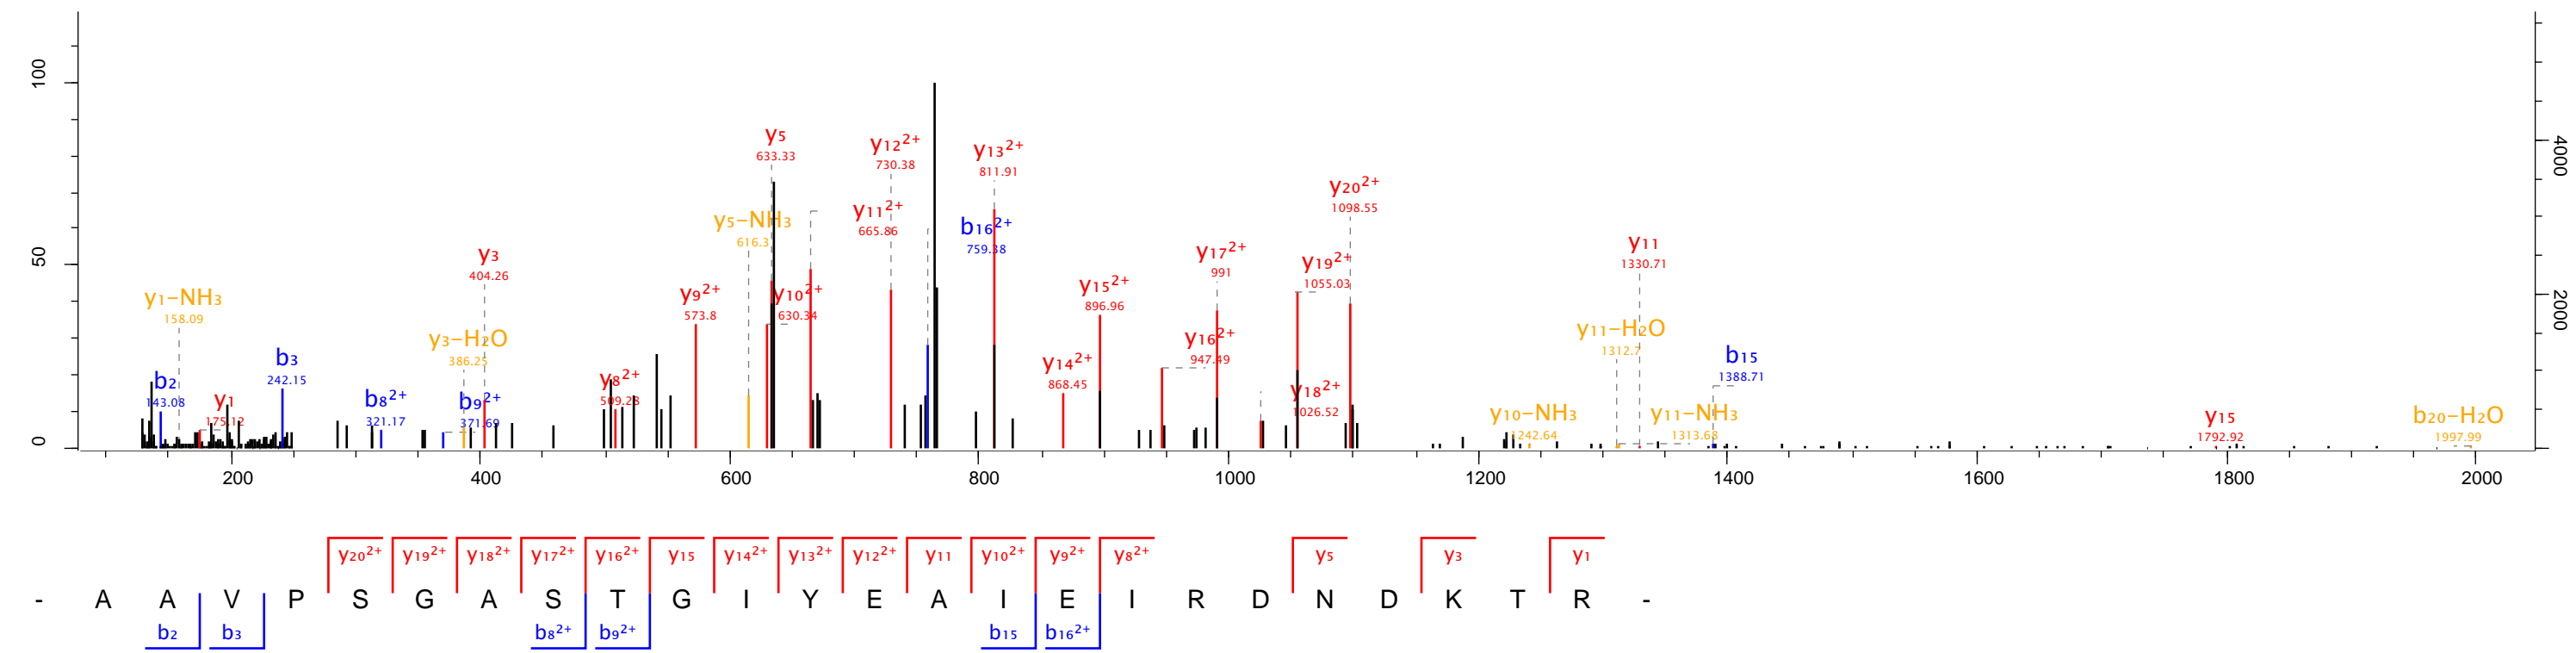

Spectral Annotation for Single-Peptide IDs between Single D11 Cells using Q-OT-LIT

Raw file 2015-01-08\_CL04\_Blastomere-15 Scan 32108 Method ITMS; HCD Score 58.27 m/z 516.6

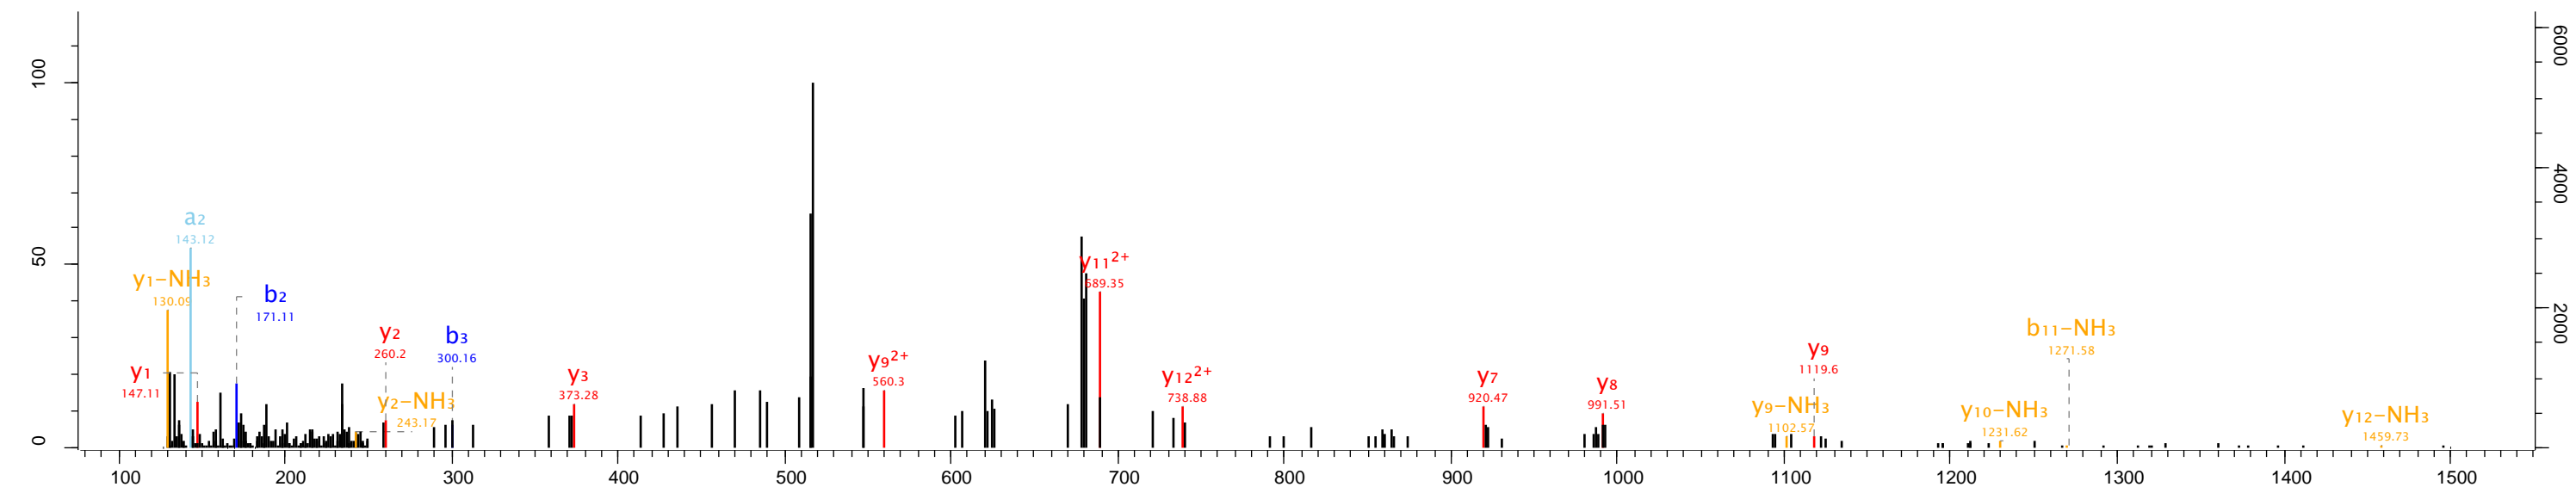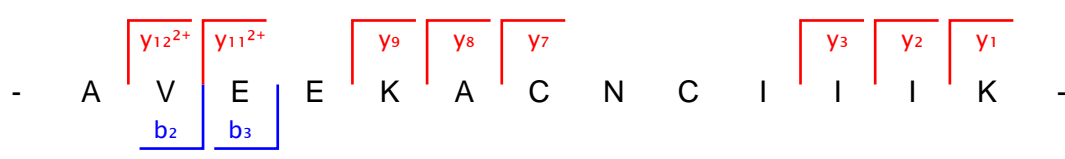

Spectral Annotation for Single-Peptide IDs between Single D11 Cells using Q-OT-LIT

Raw file 2015-01-08\_CL04\_Blastomere-15 Scan 32112 Method ITMS; HCD Score 76.68 m/z 588.77

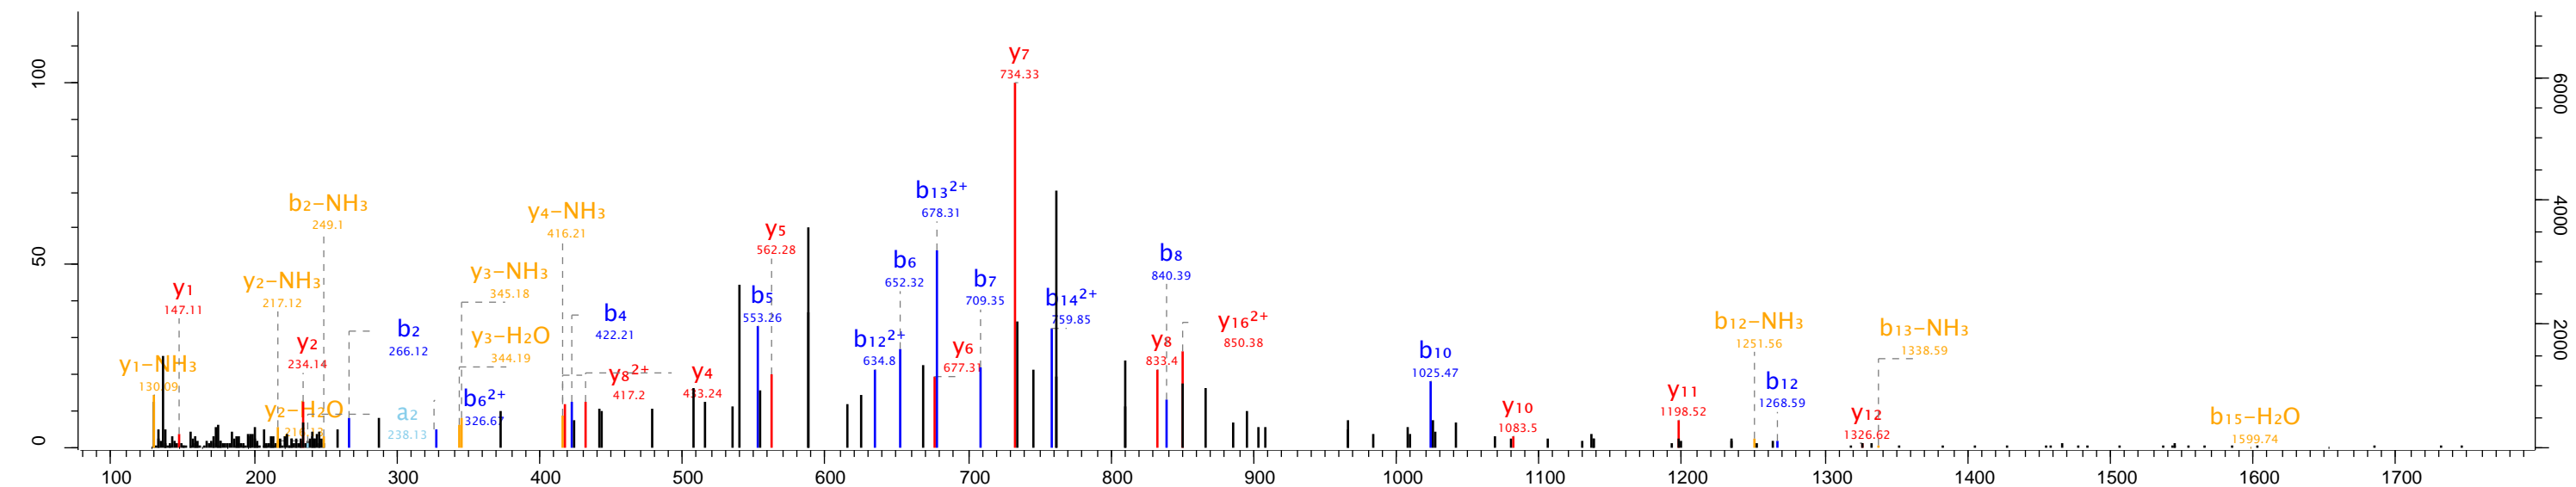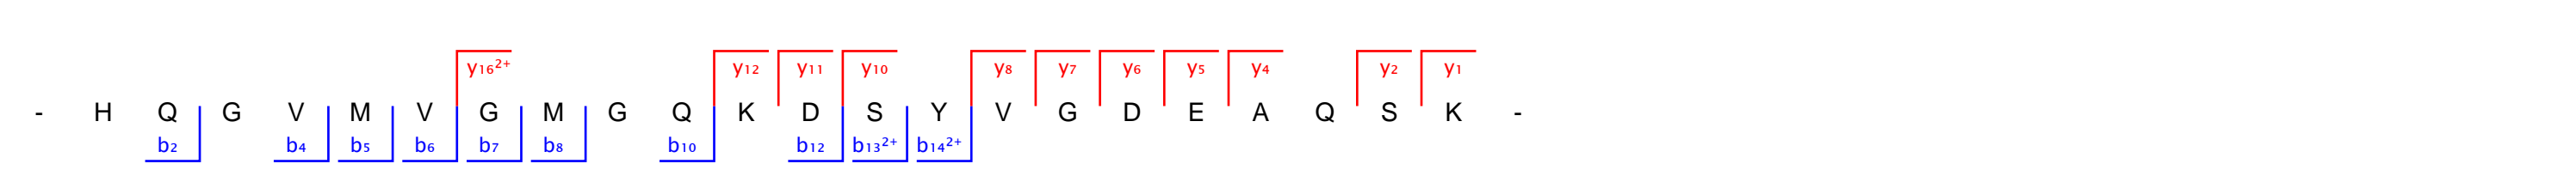



Raw file 2015-01-08\_CL04\_Blastomere-15 Scan 32122 Method ITMS; HCD Score 69.99 m/z 634.57

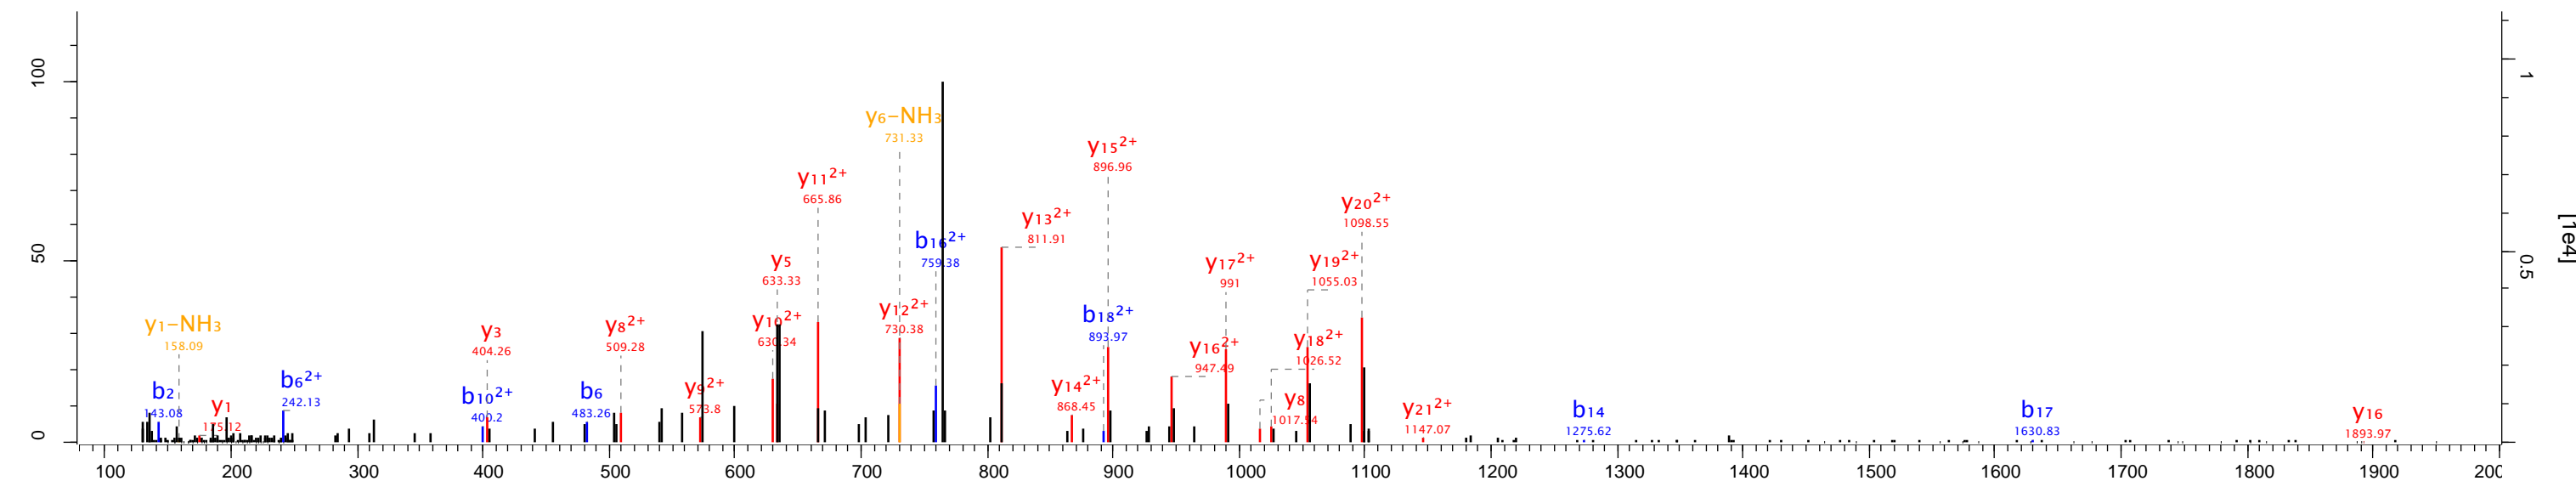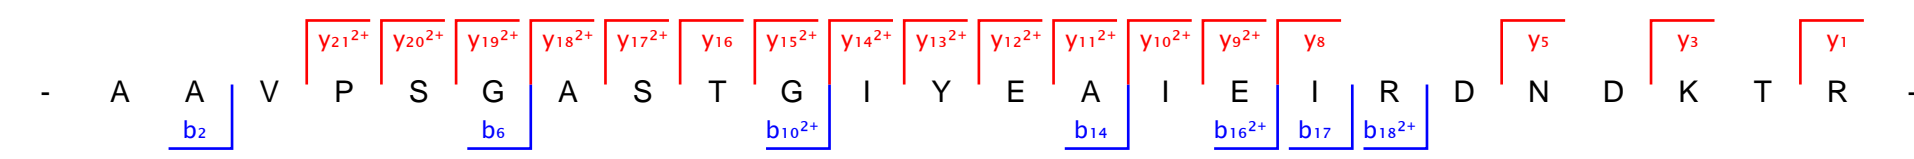

Spectral Annotation for Single-Peptide IDs between Single D11 Cells using Q-OT-LIT

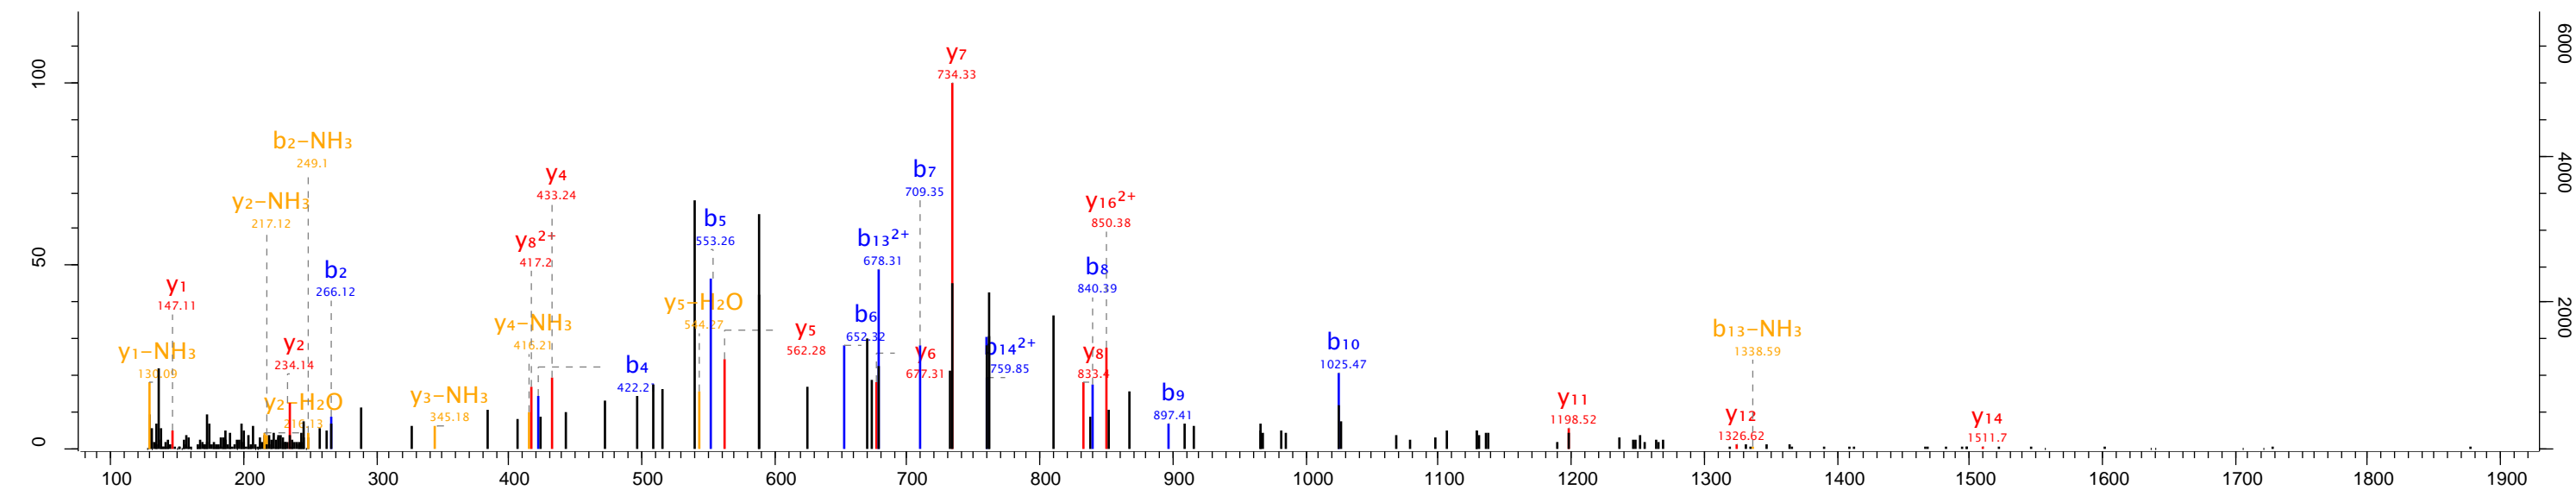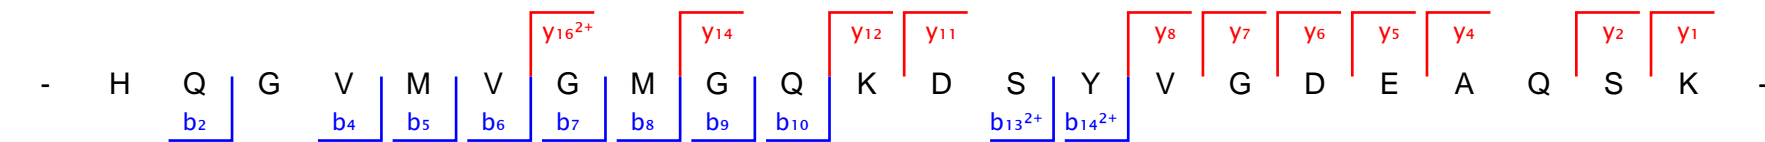

Raw file Scan Method Score m/z  
 2015-01-08\_CL04\_Blastomere-15 32147 ITMS; HCD 69.23 517.93

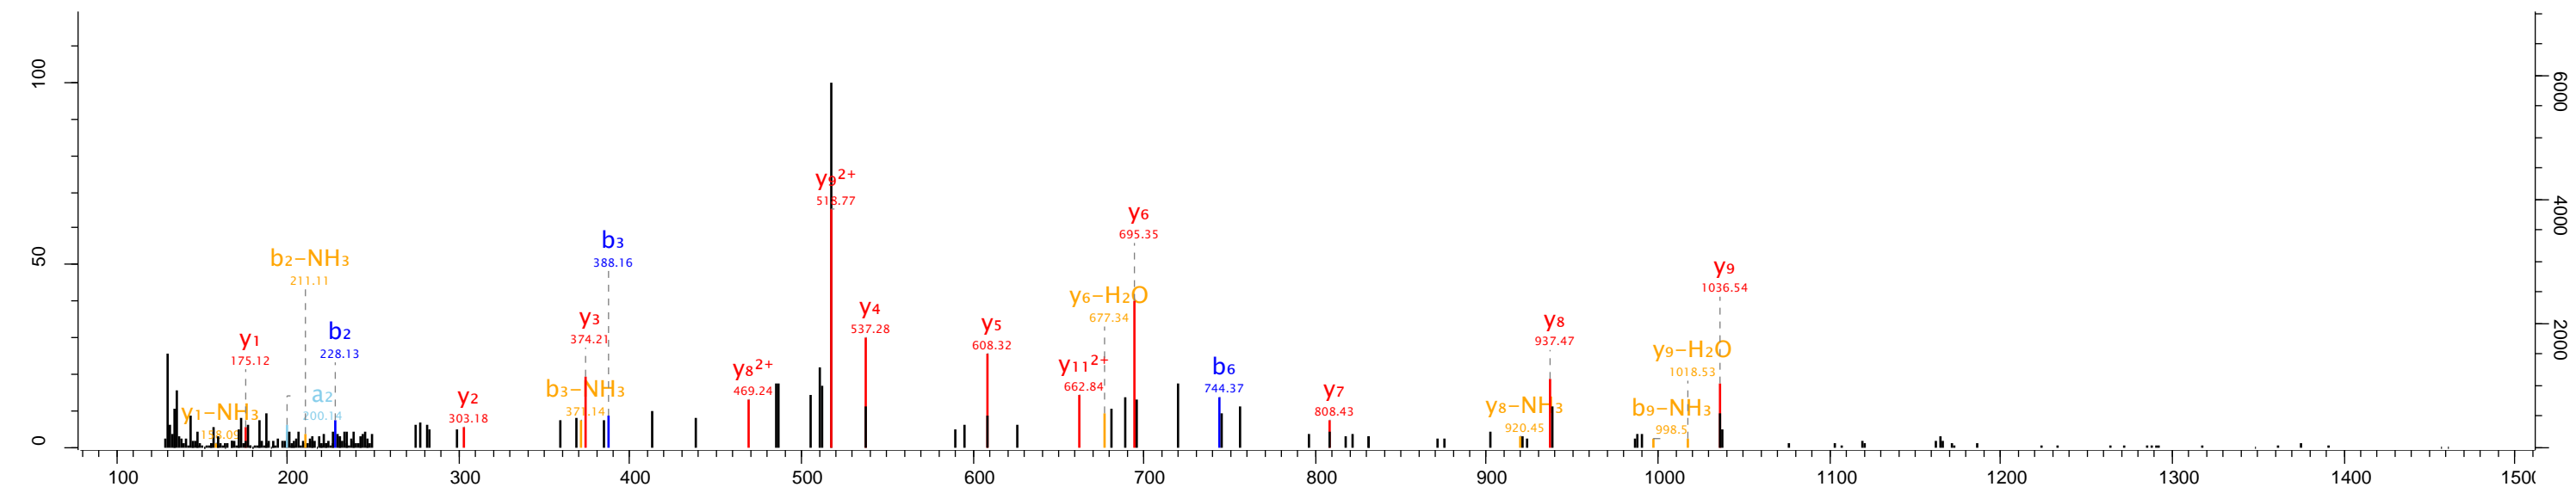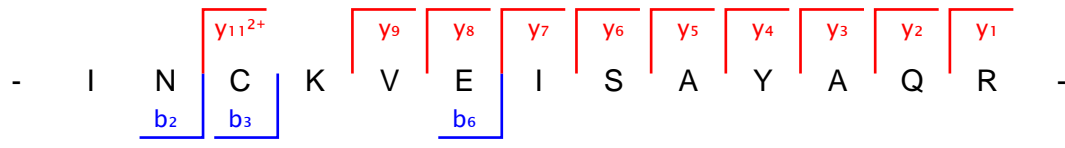

Spectral Annotation for Single-Peptide IDs between Single D11 Cells using Q-OT-LIT

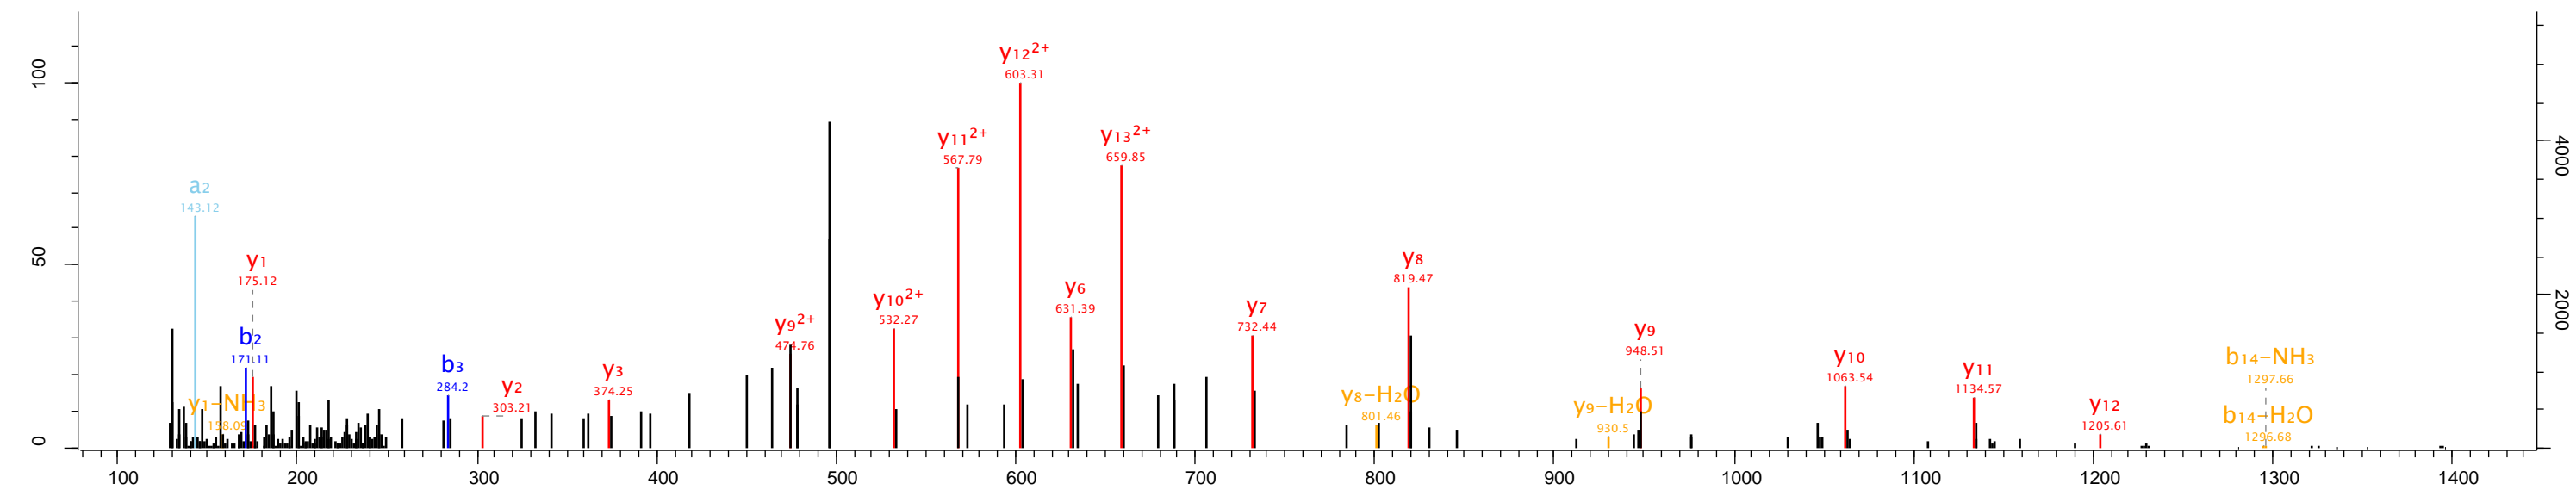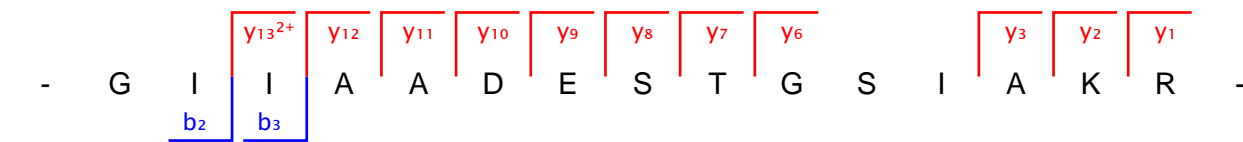

Raw file 2015-01-08\_CL04\_Blastomere-15 Scan 32398 Method ITMS; HCD Score 42.82 m/z 519.91

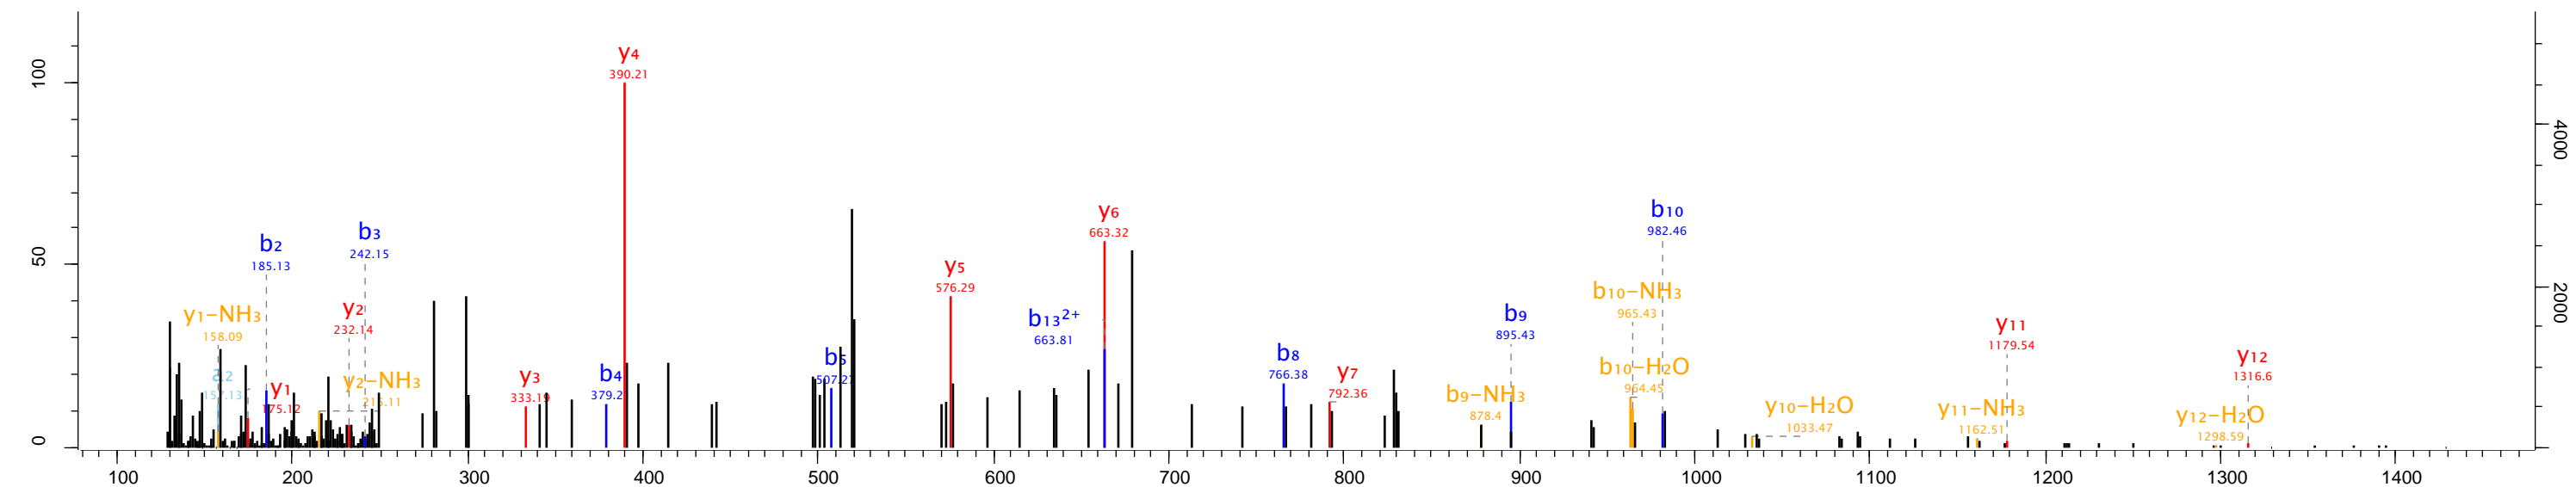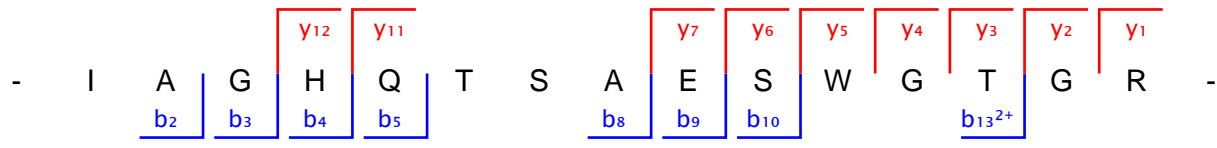

Spectral Annotation for Single-Peptide IDs between Single D11 Cells using Q-OT-LIT

Raw file 2015-01-08\_CL04\_Blastomere-15 Scan 32403 Method ITMS; HCD Score 57.8 m/z 634.57

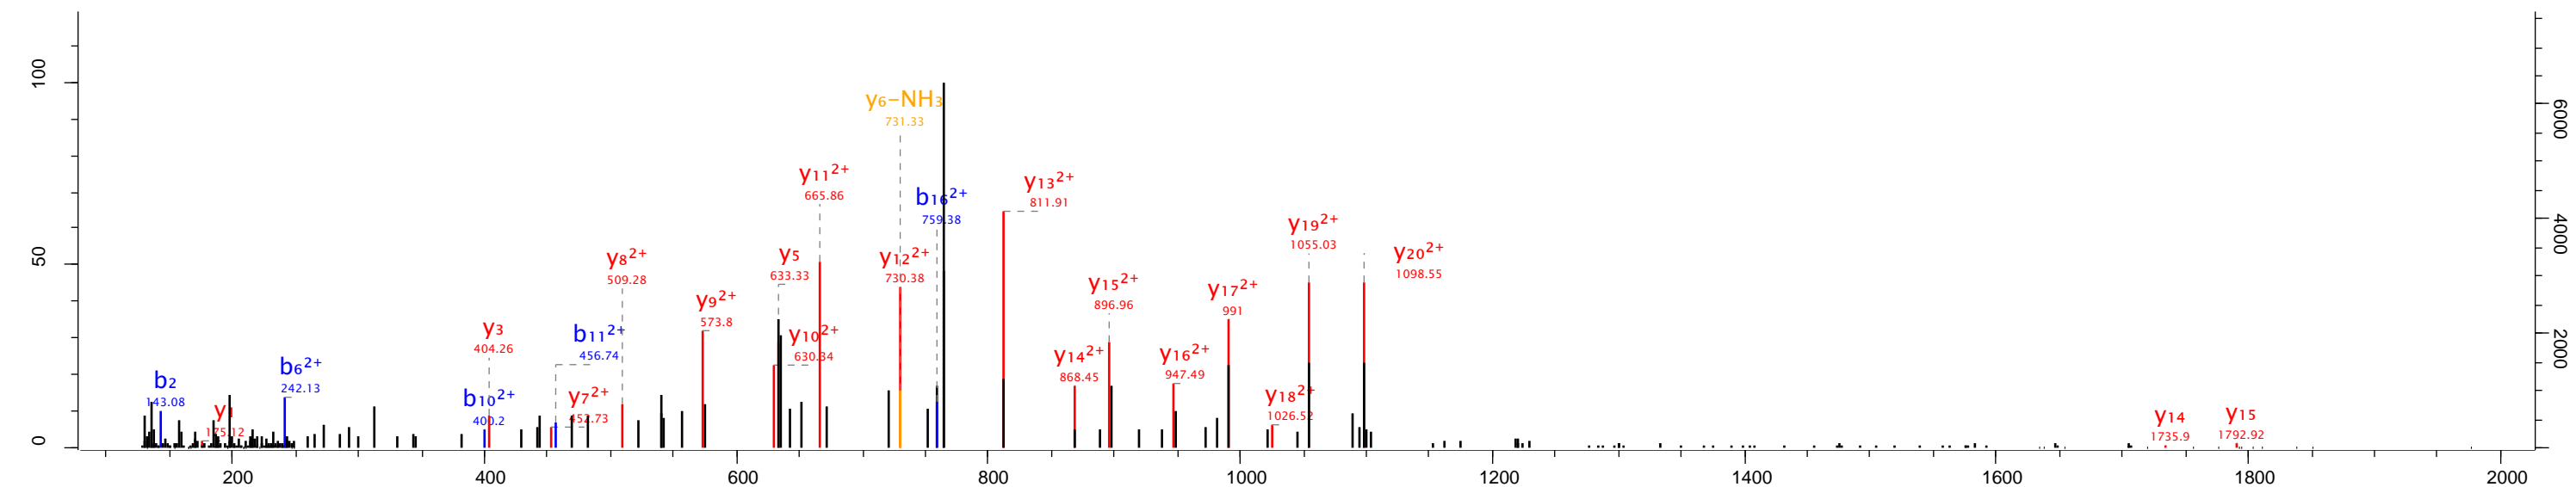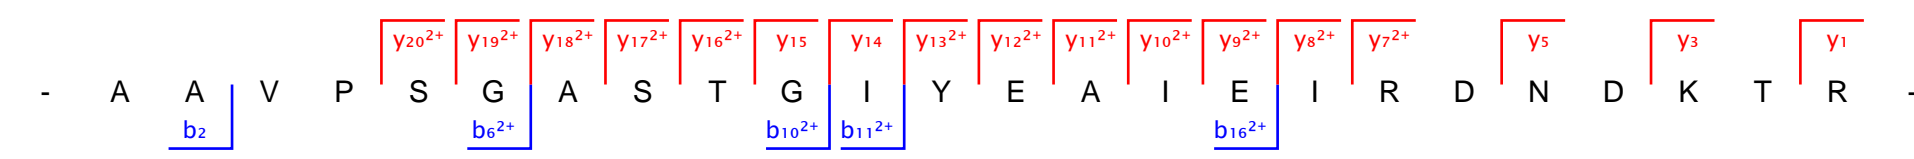

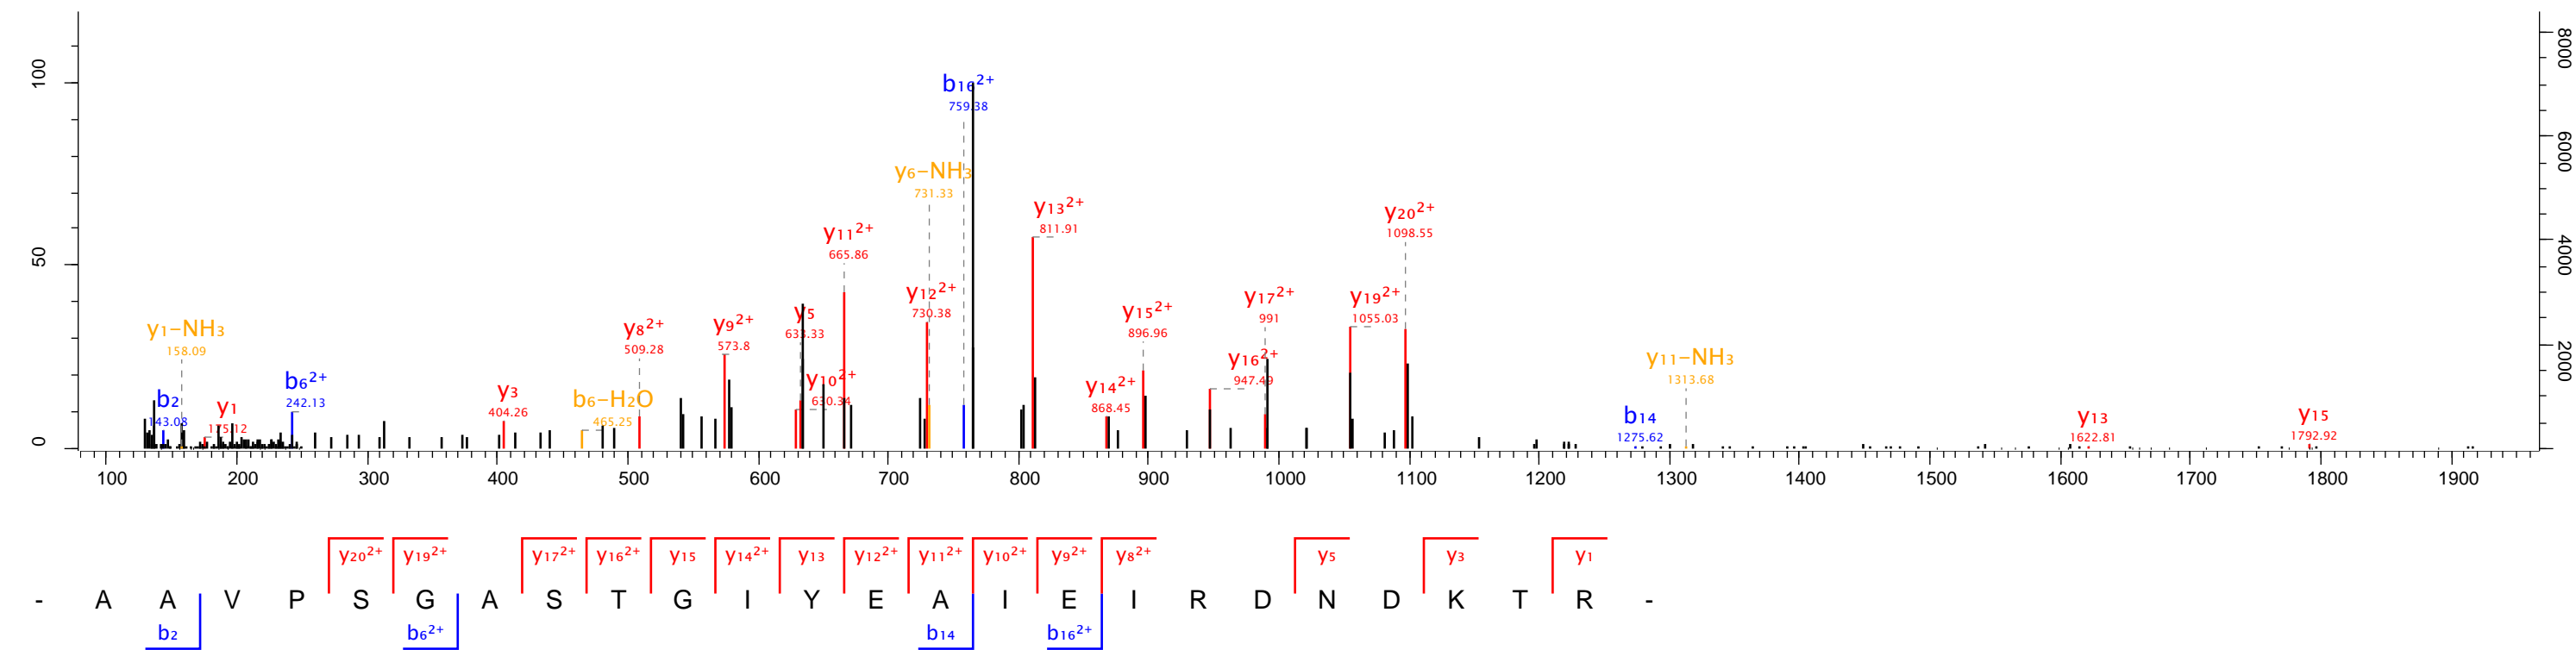

Raw file  
 2015-01-08\_CL04\_Blastomere-15  
 Scan 32468 Method ITMS; HCD Score 50.88 m/z 634.58

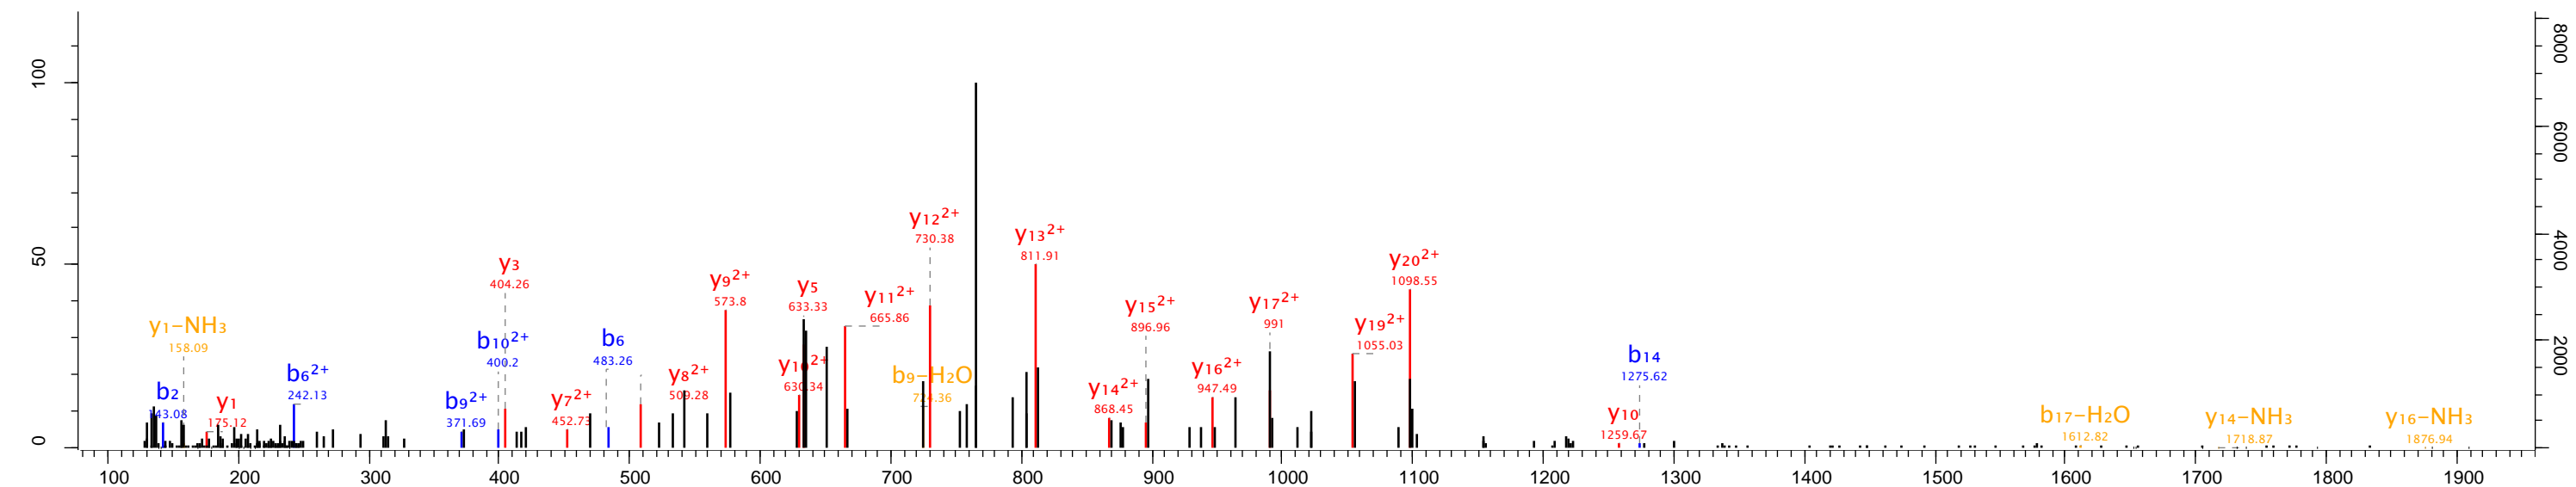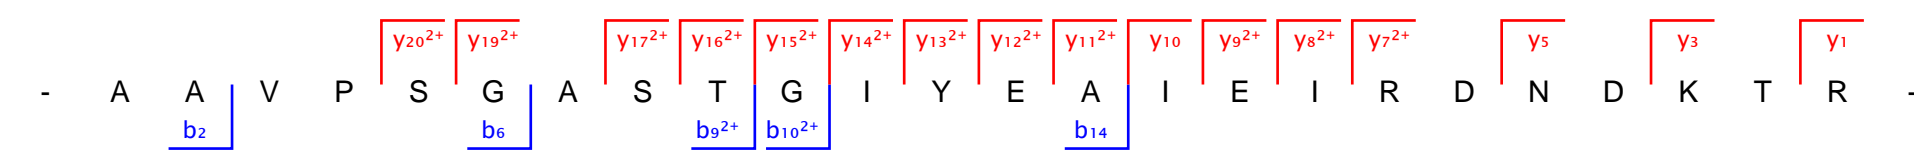

Spectral Annotation for Single-Peptide IDs between Single D11 Cells using Q-OT-LIT



Raw file 2015-01-08\_CL04\_Blastomere-15 Scan 32494 Method ITMS; HCD Score 43.81 m/z 729.4

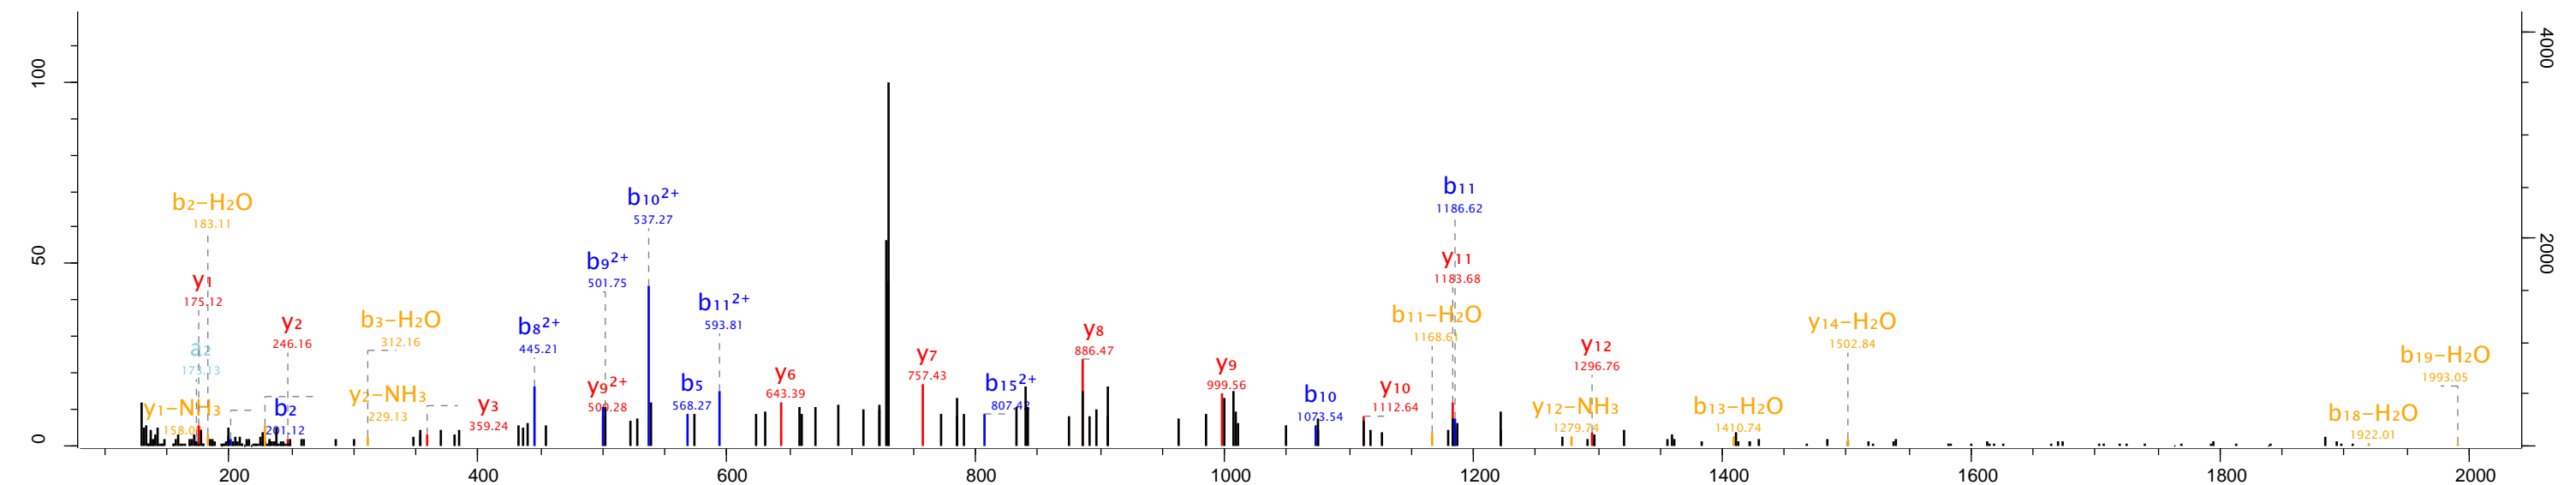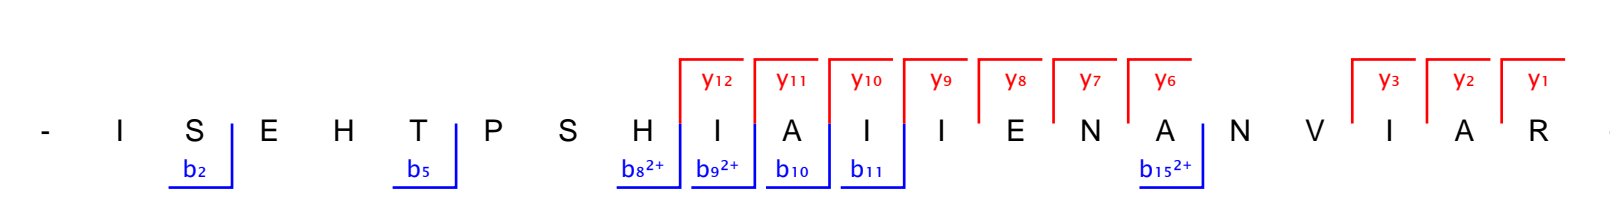

Spectral Annotation for Single-Peptide IDs between Single D11 Cells using Q-OT-LIT

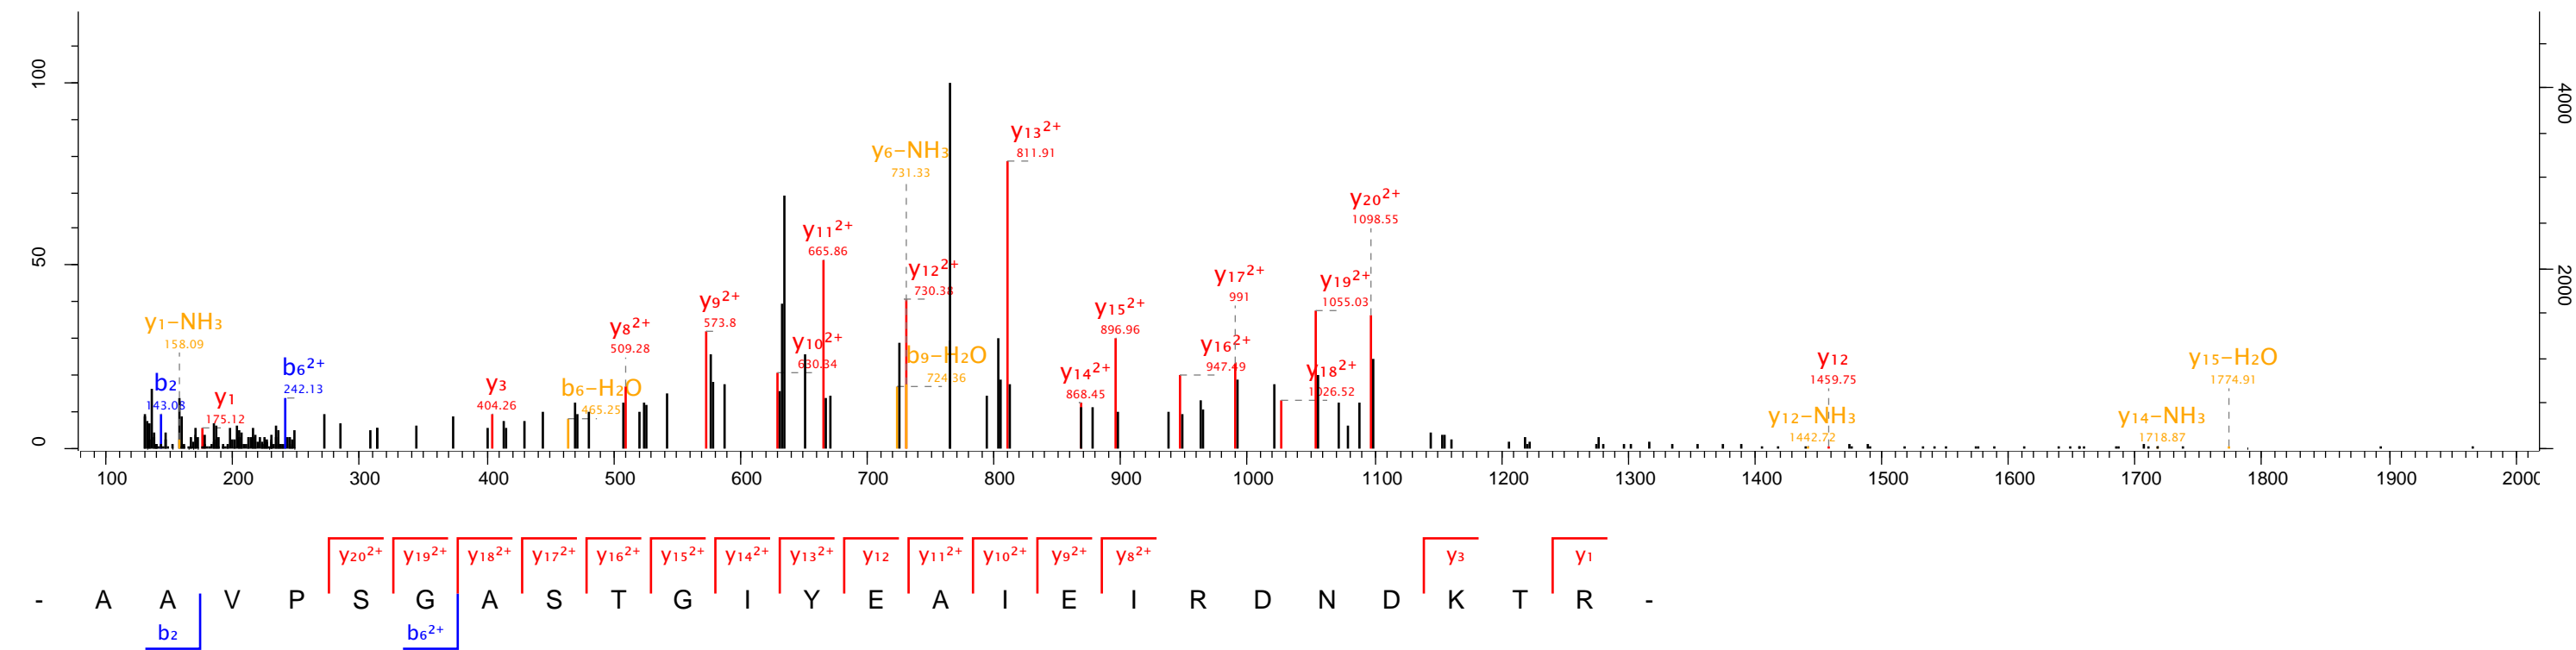

Raw file: 2015-01-08\_CL04\_Blastomere-15  
 Scan: 32540 Method: ITMS; HCD Score: 67.64 m/z: 729.06

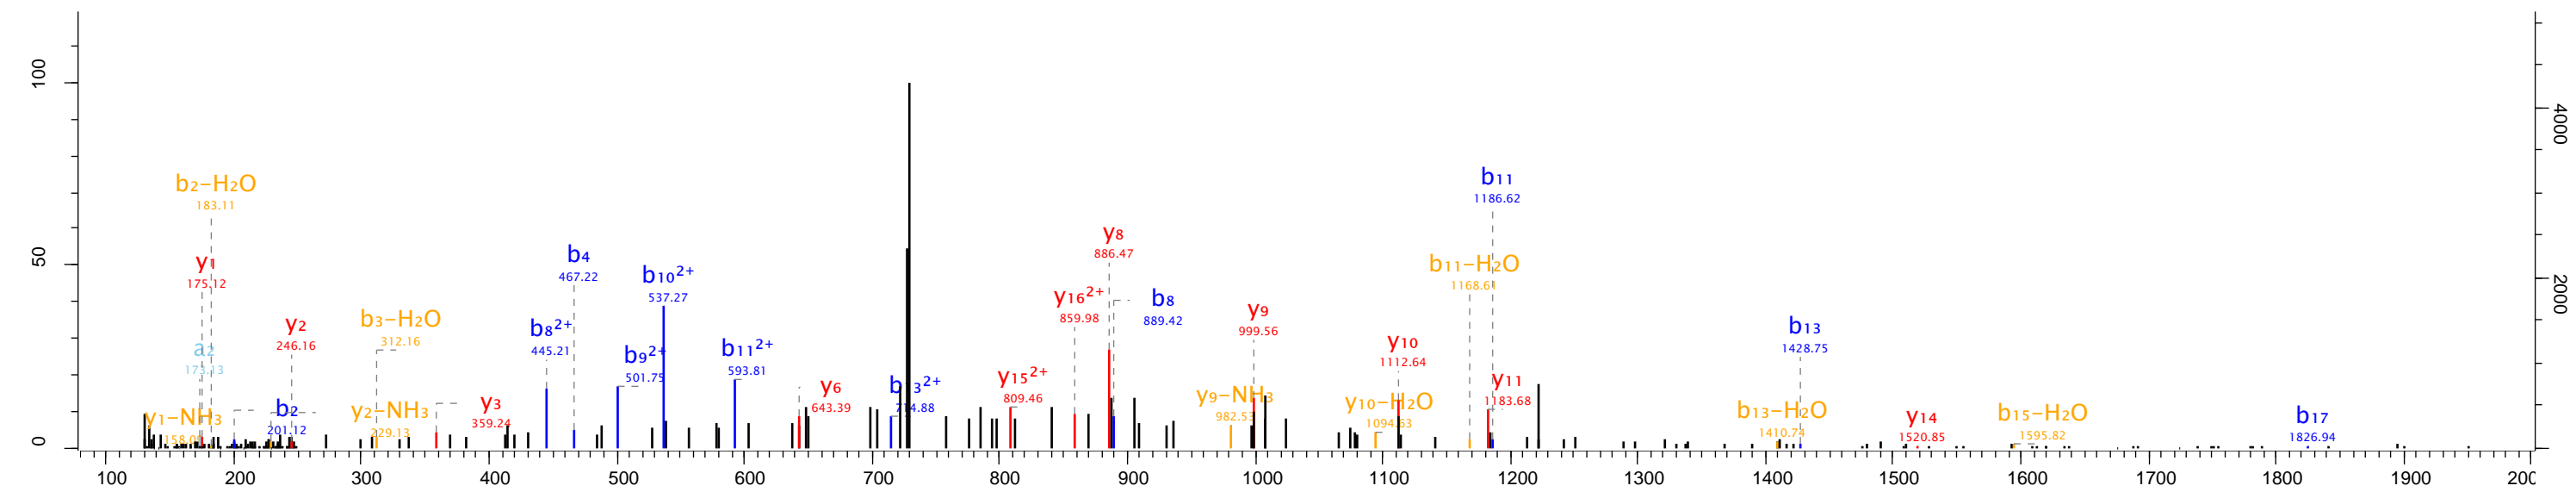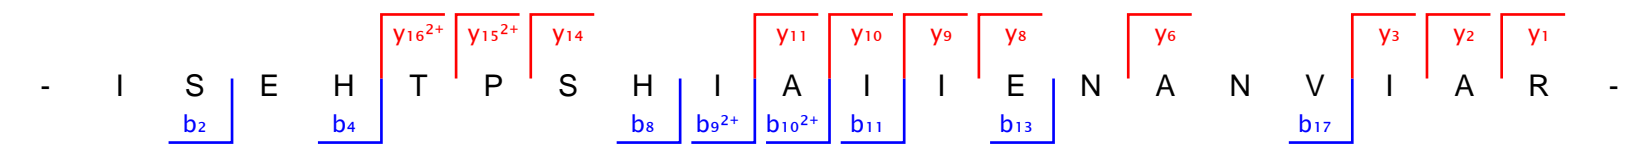

Spectral Annotation for Single-Peptide IDs between Single D11 Cells using Q-OT-LIT

Raw file 2015-01-08\_CL04\_Blastomere-15 Scan 32546 Method ITMS; HCD Score 44.05 m/z 634.33

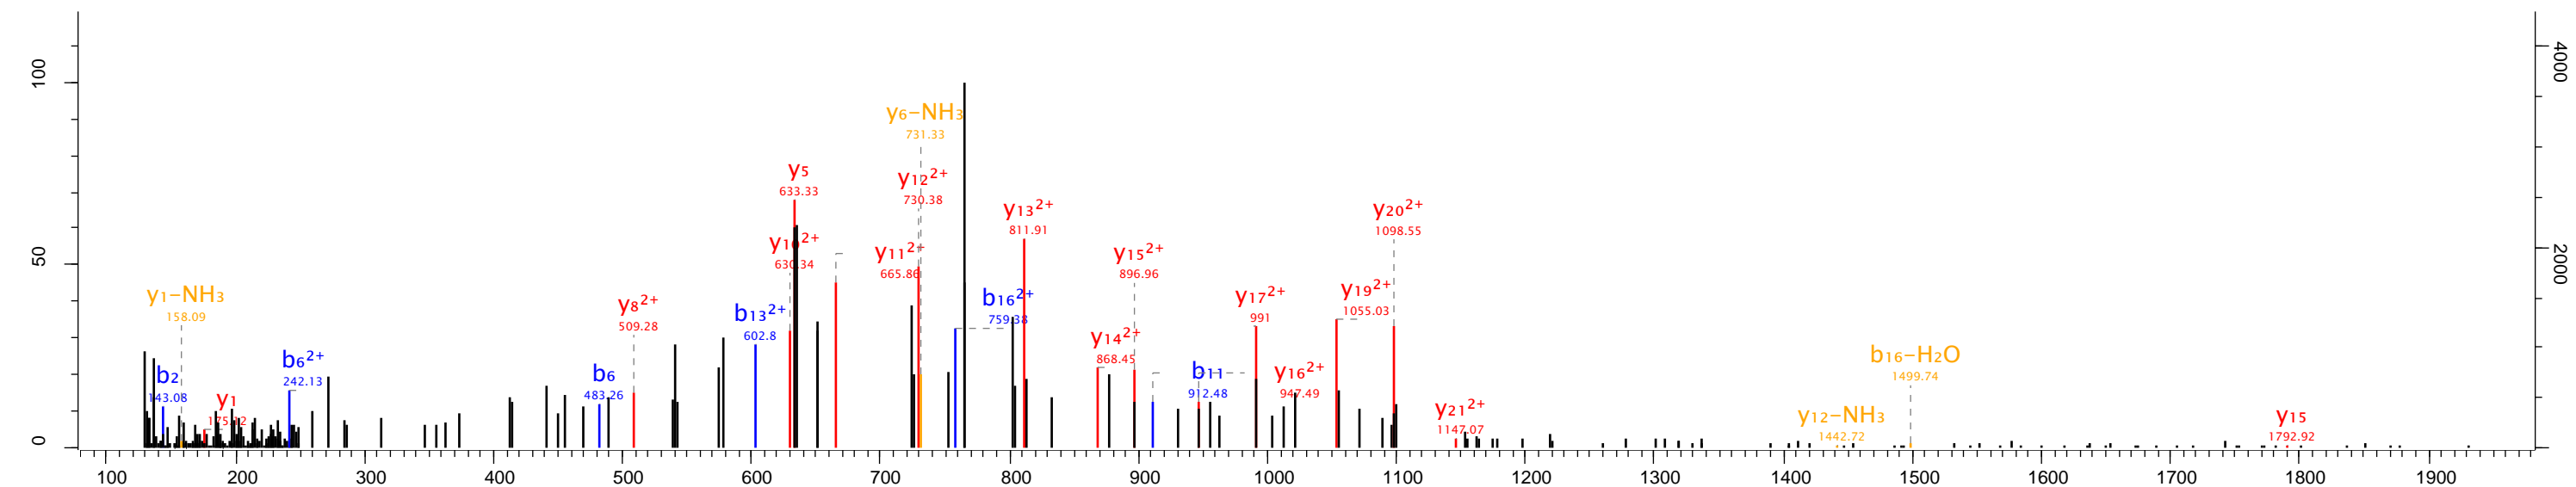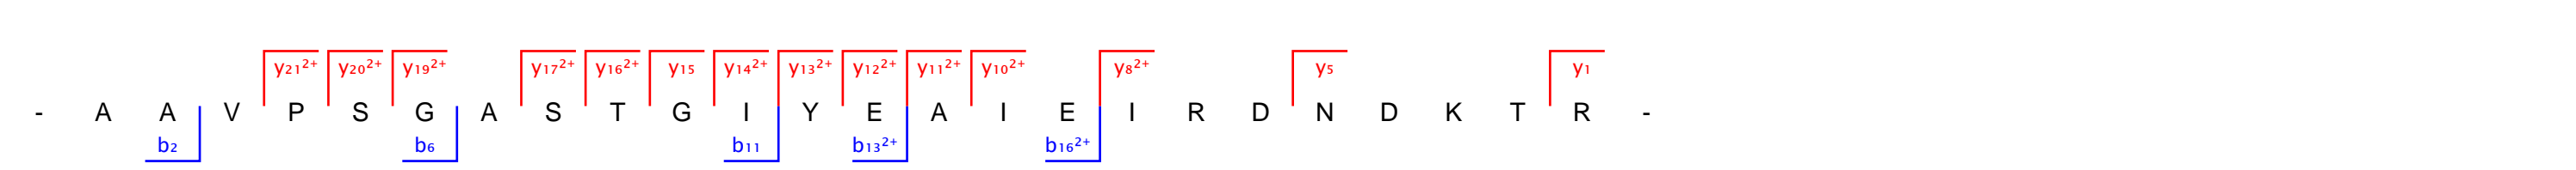

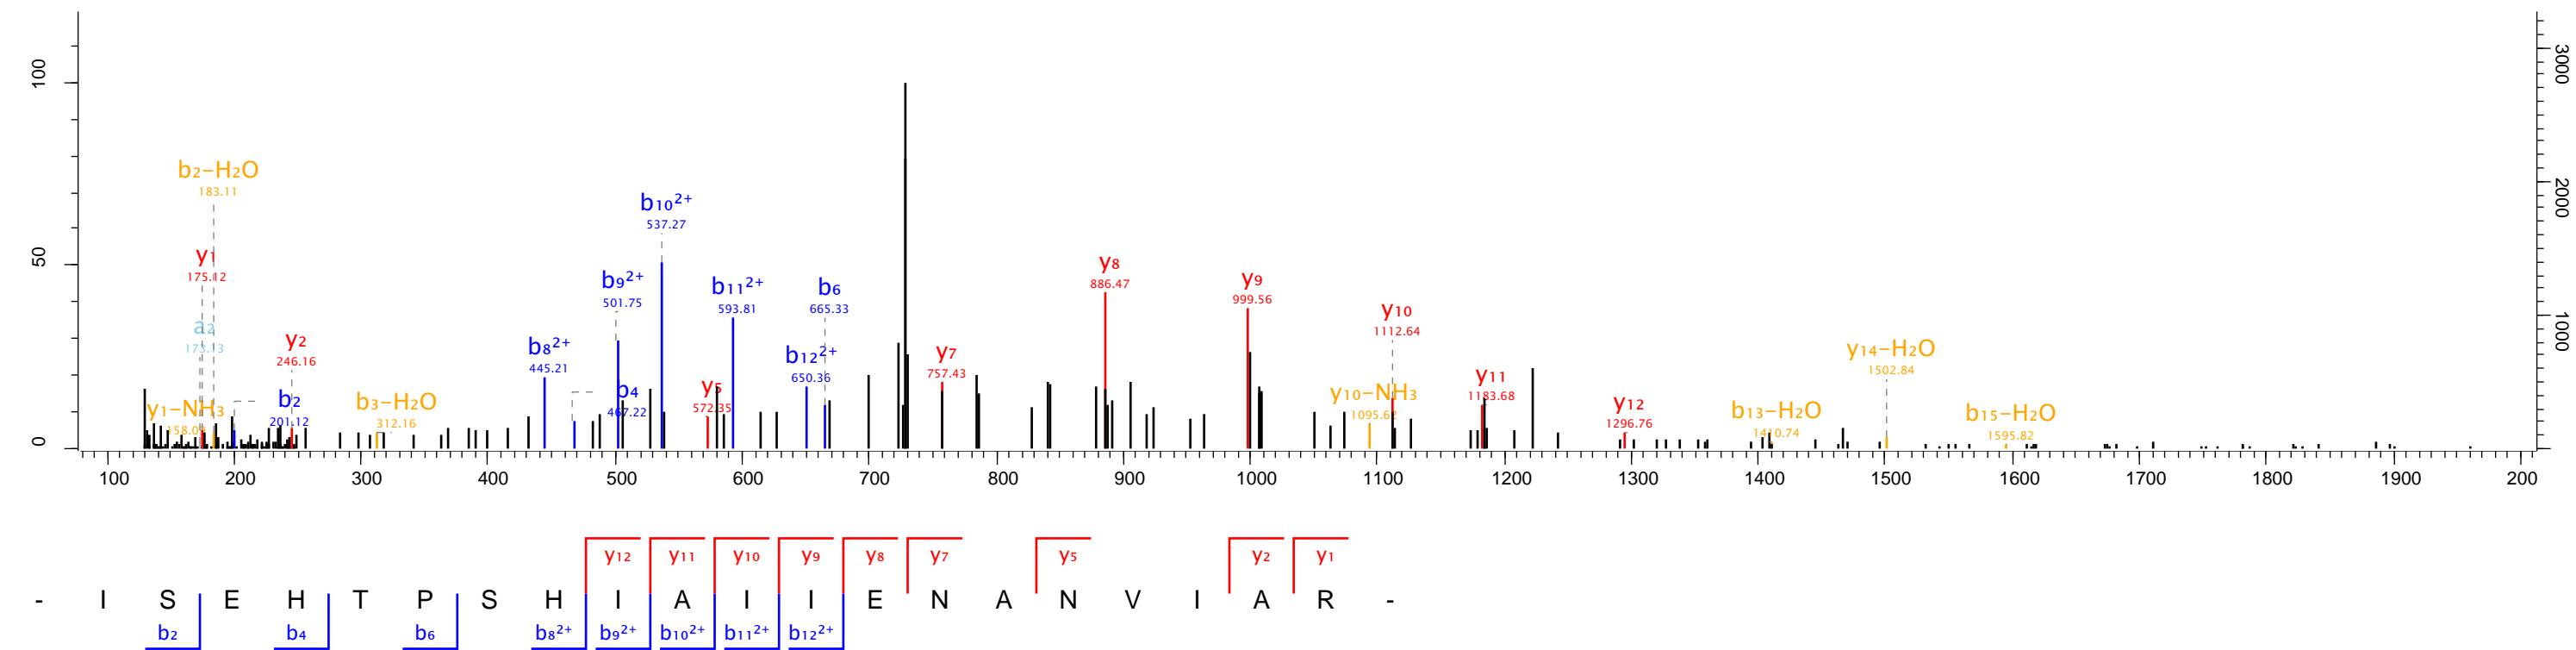

Raw file 2015-01-08\_CL04\_Blastomere-15 Scan 32581 Method ITMS; HCD Score 56.04 m/z 729.39

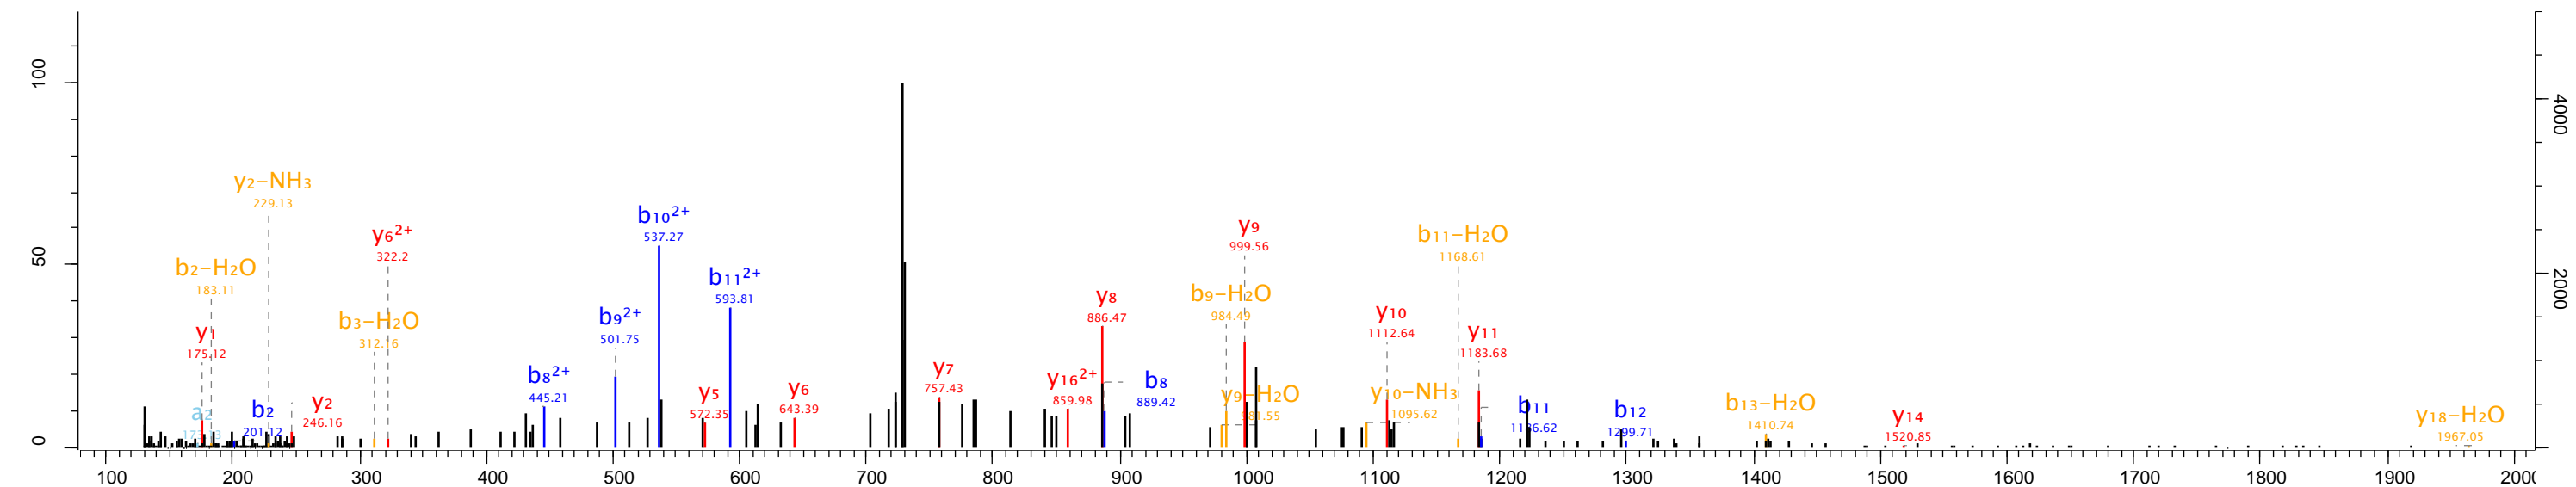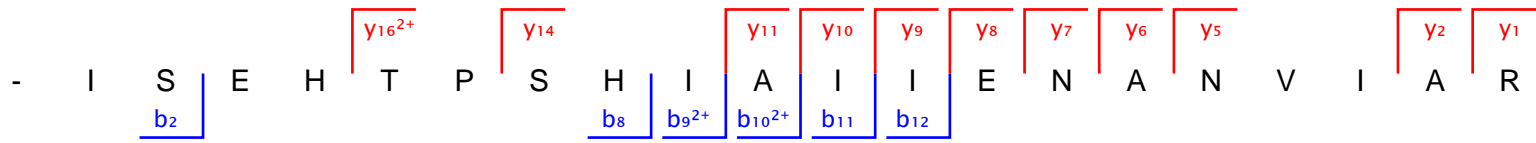

Spectral Annotation for Single-Peptide IDs between Single D11 Cells using Q-OT-LIT

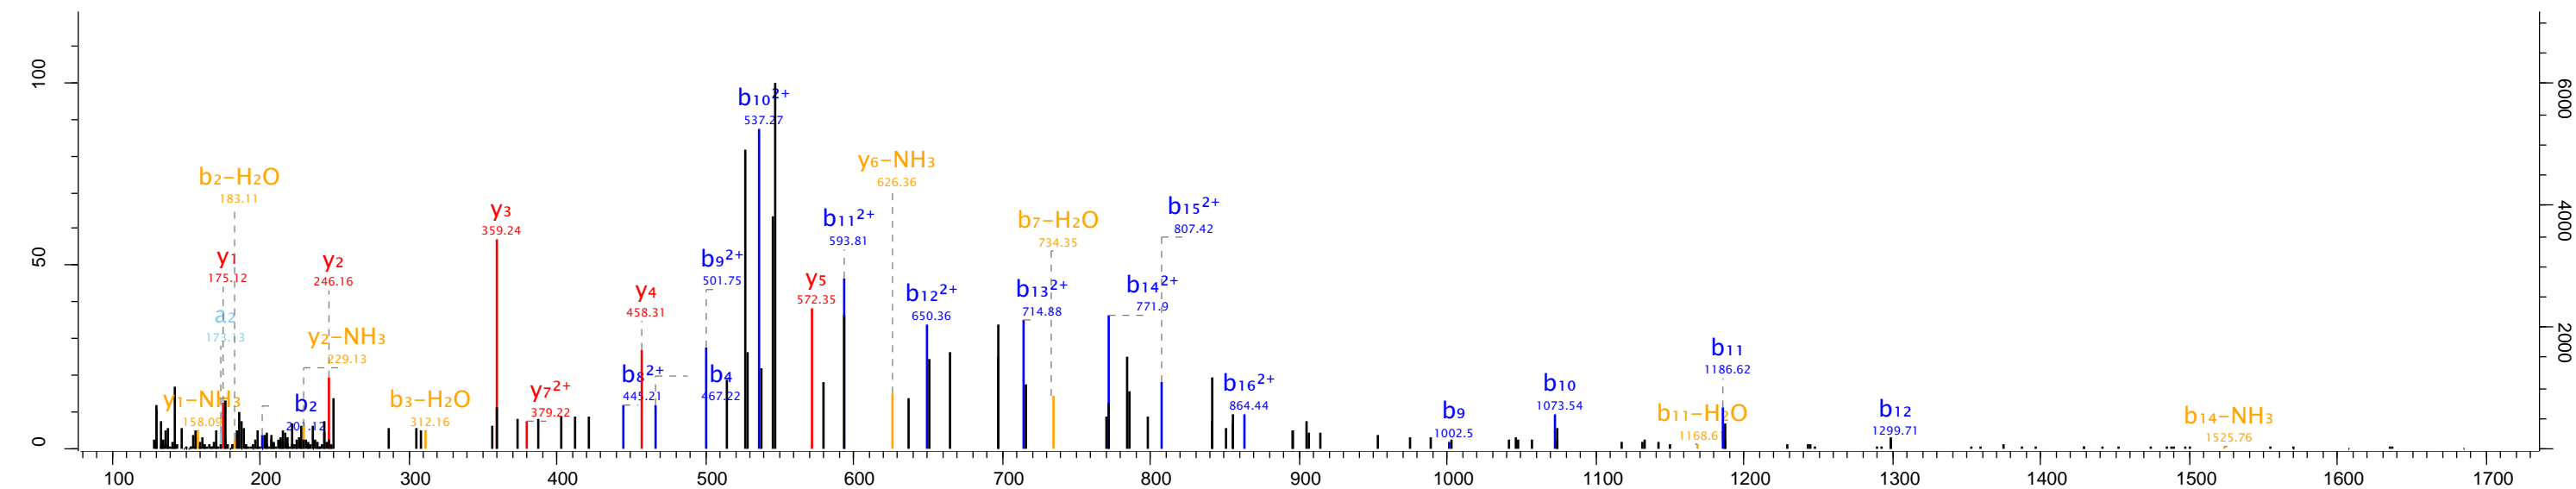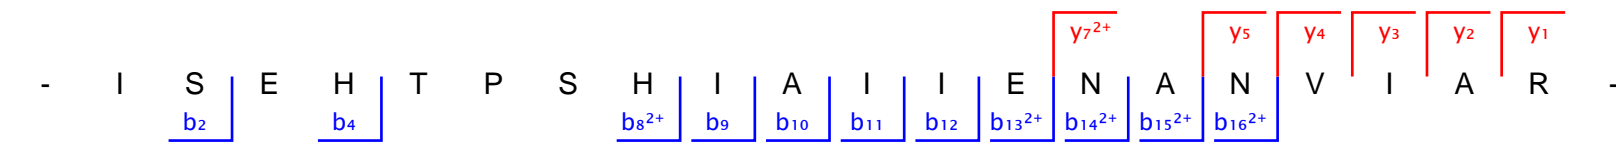

Raw file 2015-01-08\_CL04\_Blastomere-15 Scan 32599 Method ITMS; HCD Score 43.63 m/z 725.14

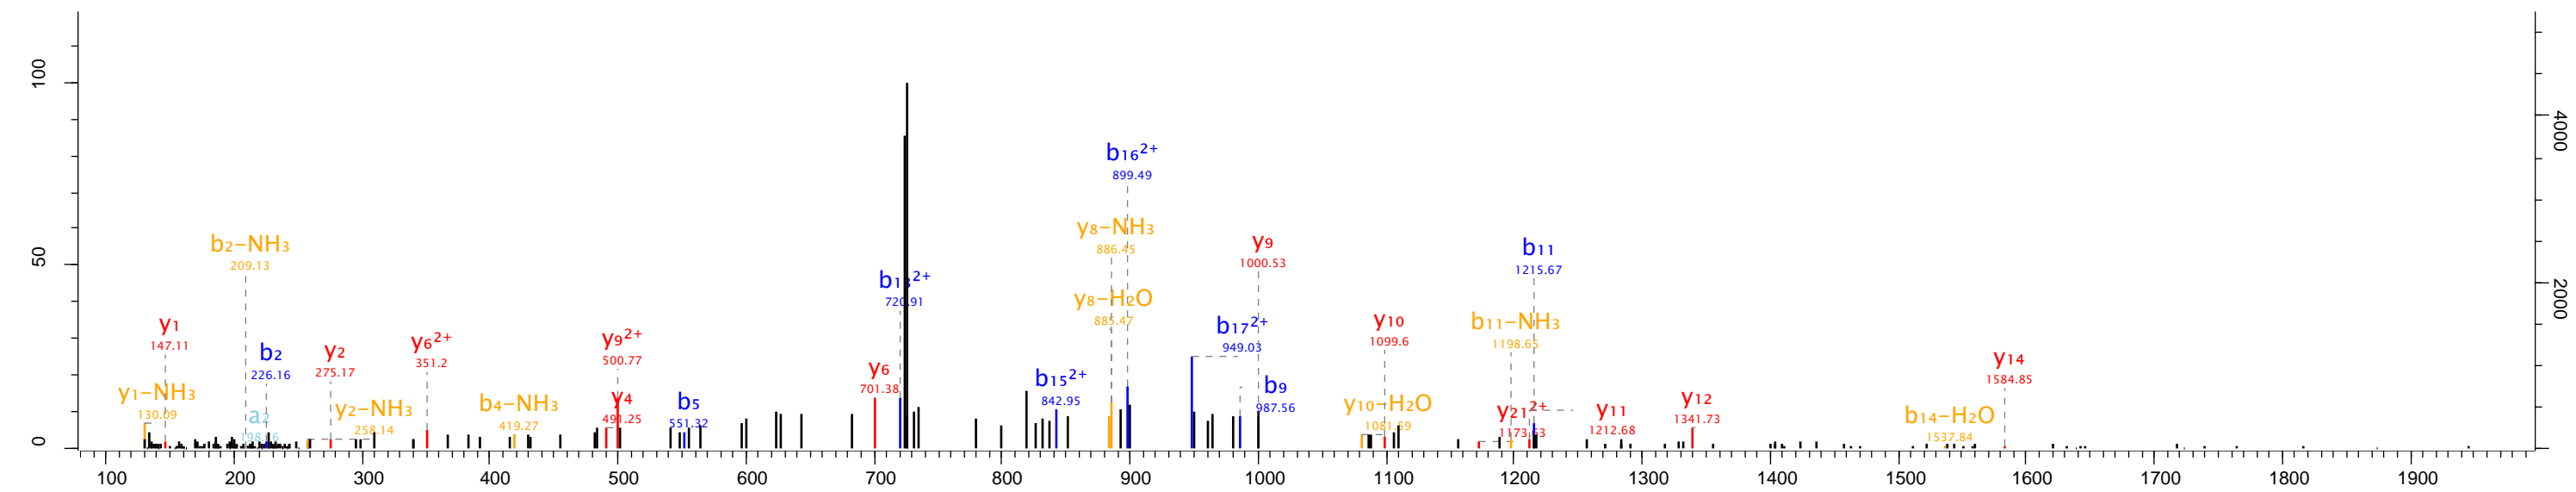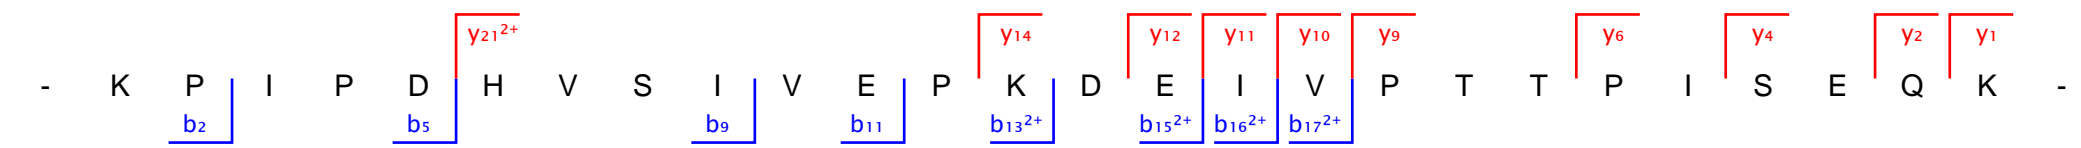

Spectral Annotation for Single-Peptide IDs between Single D11 Cells using Q-OT-LIT



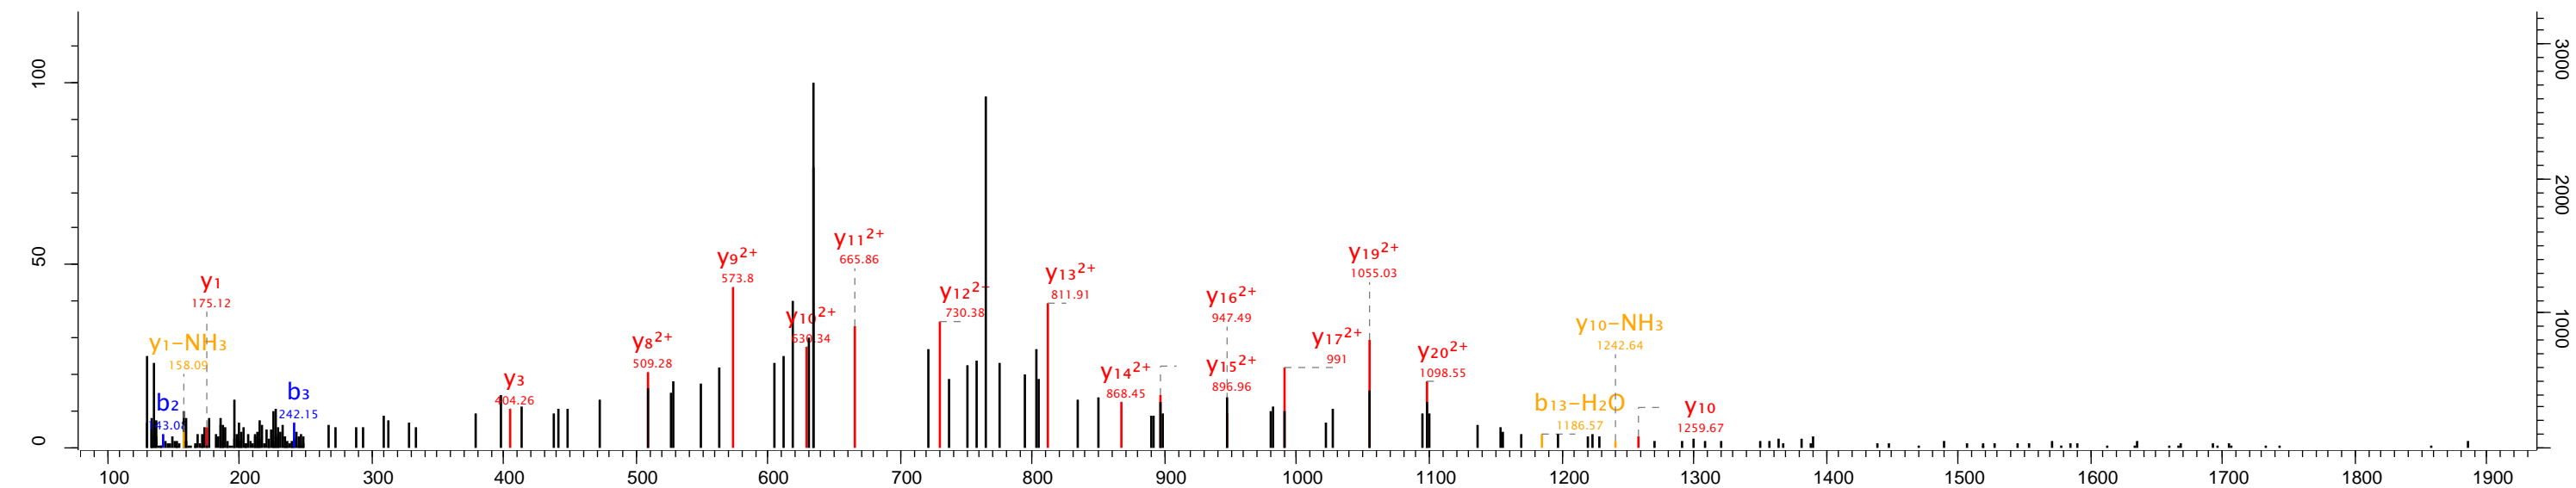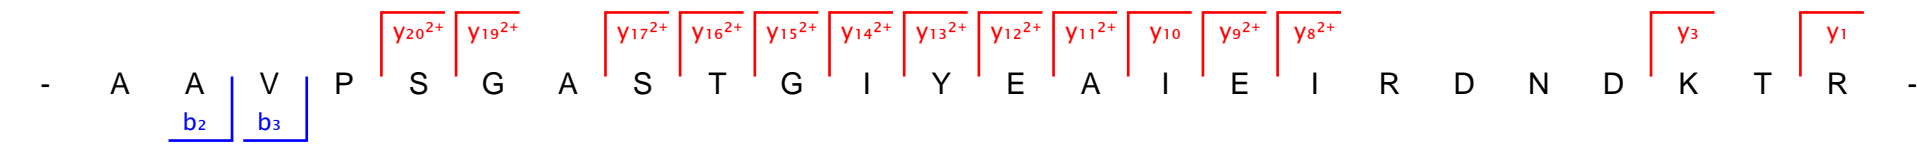

Raw file 2015-01-08\_CL04\_Blastomere-15 Scan 32621 Method ITMS; HCD Score 51.57 m/z 621.85

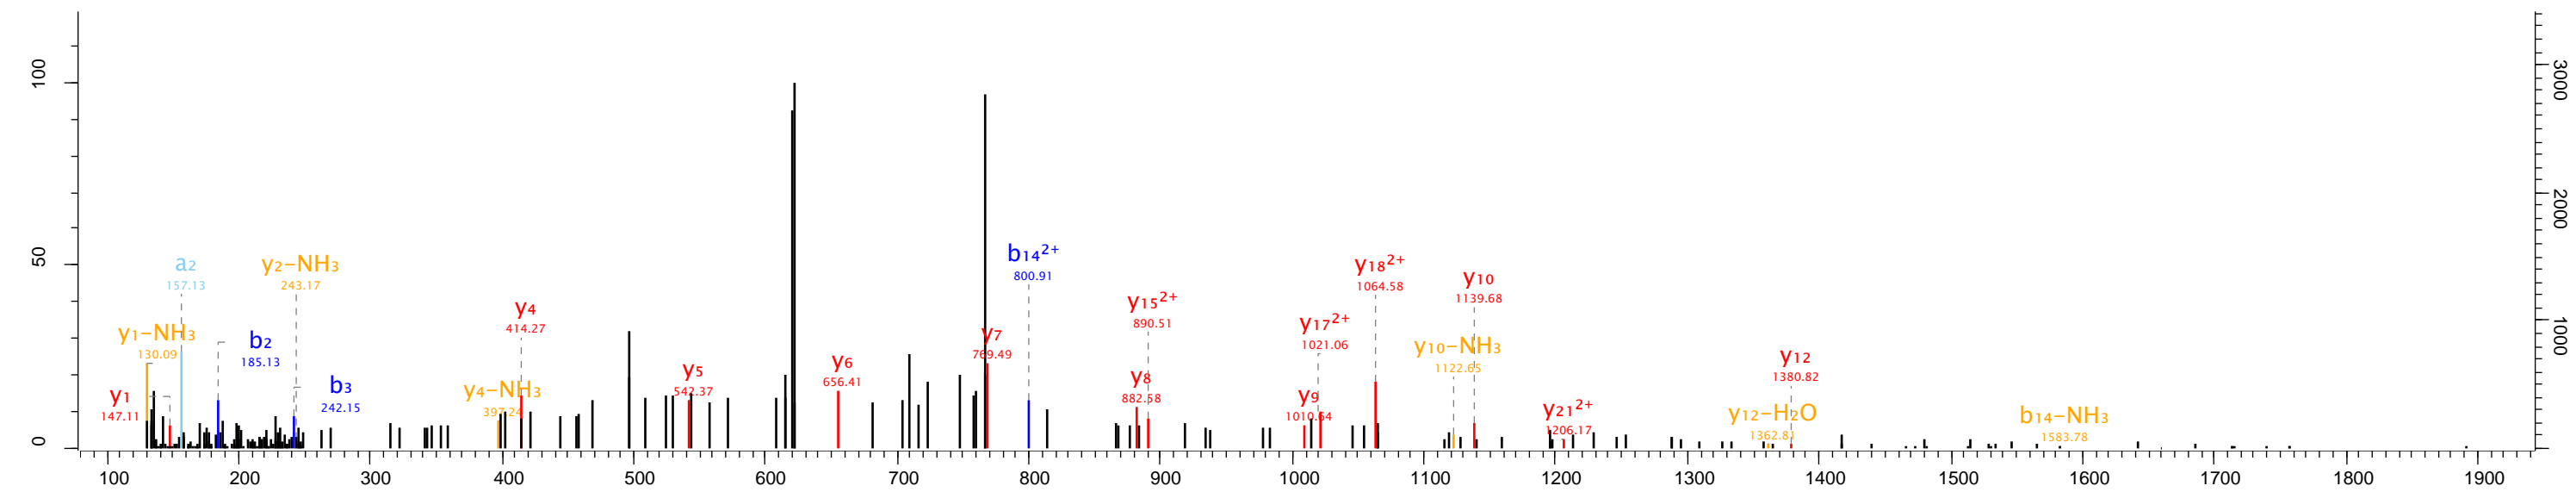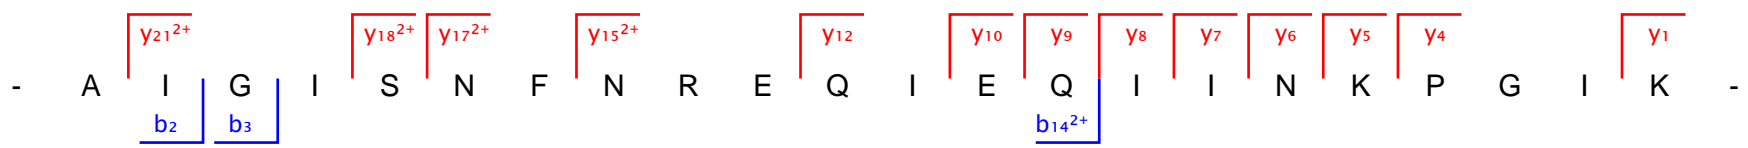

Spectral Annotation for Single-Peptide IDs between Single D11 Cells using Q-OT-LIT

Raw file 2015-01-08\_CL04\_Blastomere-15 Scan 32629 Method ITMS; HCD Score 52.89 m/z 542.29

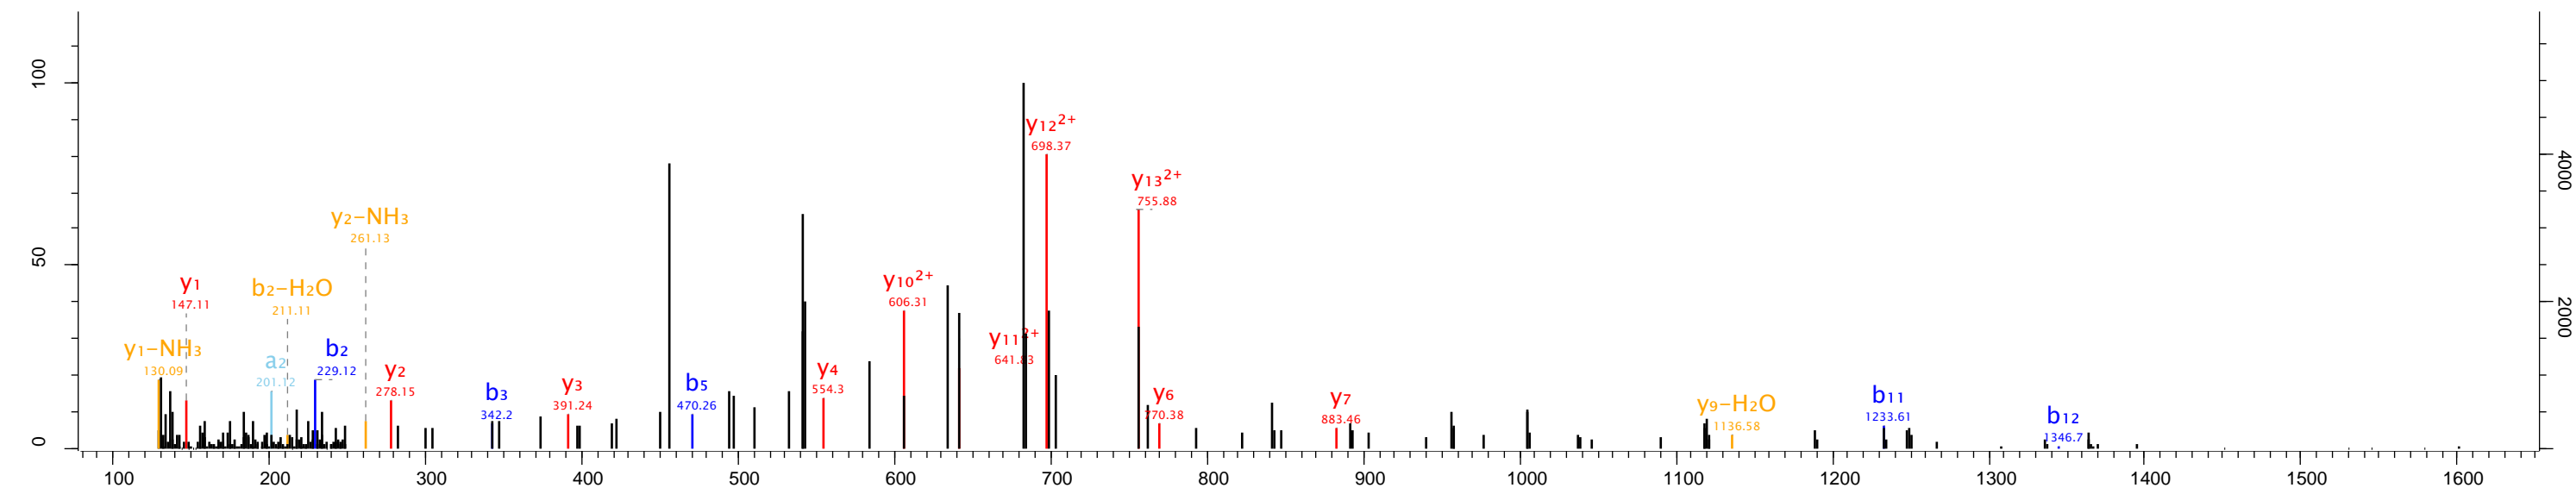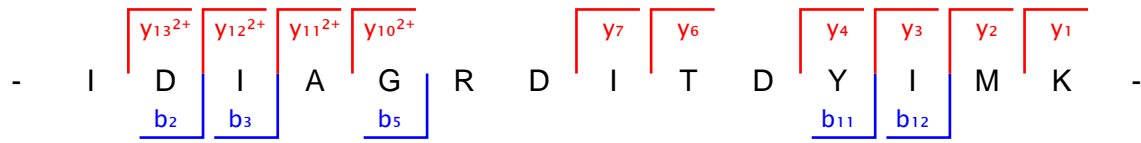

Spectral Annotation for Single-Peptide IDs between Single D11 Cells using Q-OT-LIT

Raw file 2015-01-08\_CL04\_Blastomere-15 Scan 32634 Method ITMS; HCD Score 54.01 m/z 519.93

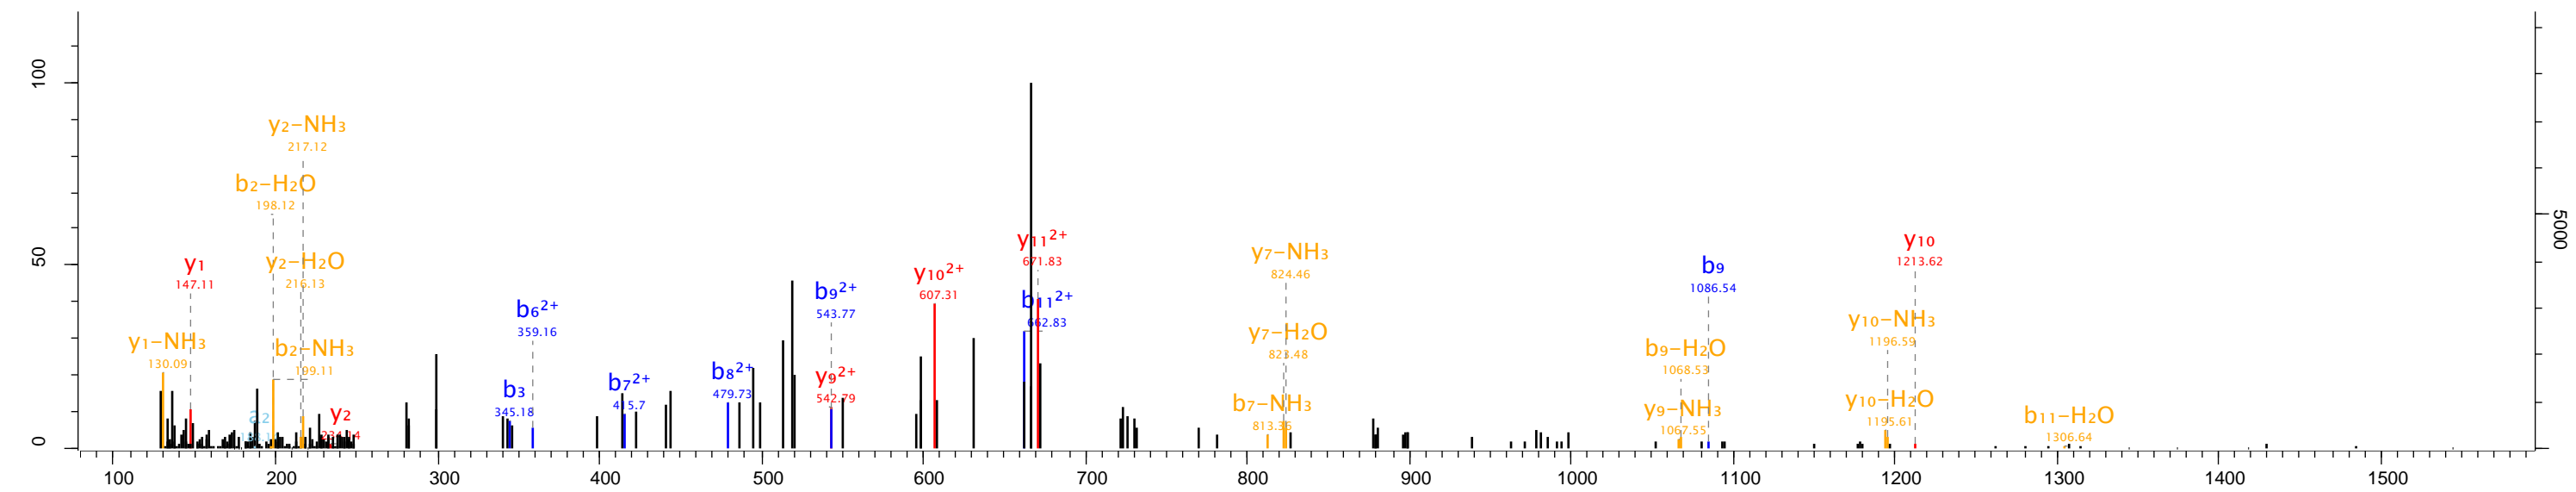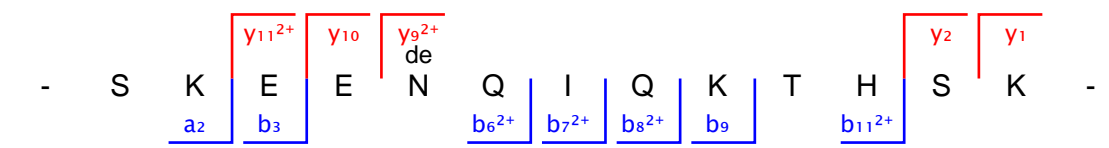

Spectral Annotation for Single-Peptide IDs between Single D11 Cells using Q-OT-LIT

Raw file 2015-01-08\_CL04\_Blastomere-15 Scan 32653 Method ITMS; HCD Score 51.61 m/z 520.27

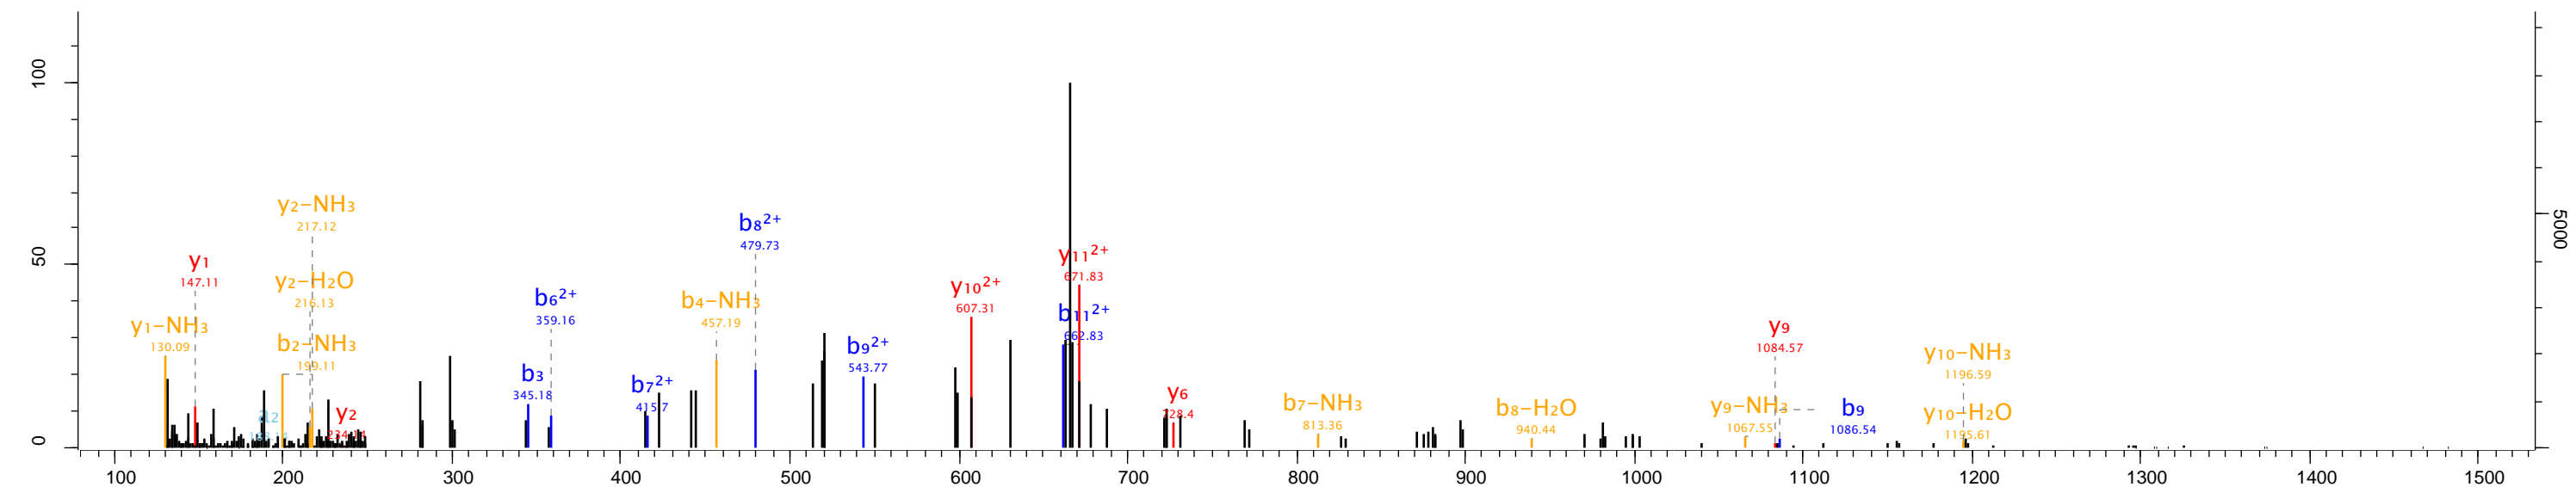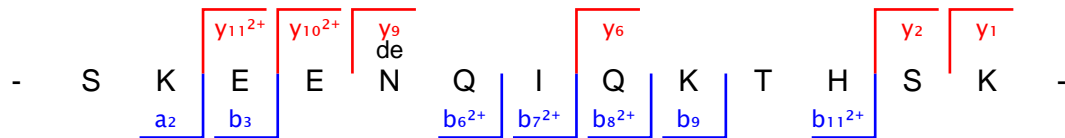

Spectral Annotation for Single-Peptide IDs between Single D11 Cells using Q-OT-LIT

Raw file 2015-01-08\_CL04\_Blastomere-15 Scan 32676 Method ITMS; HCD Score 73.22 m/z 542.29

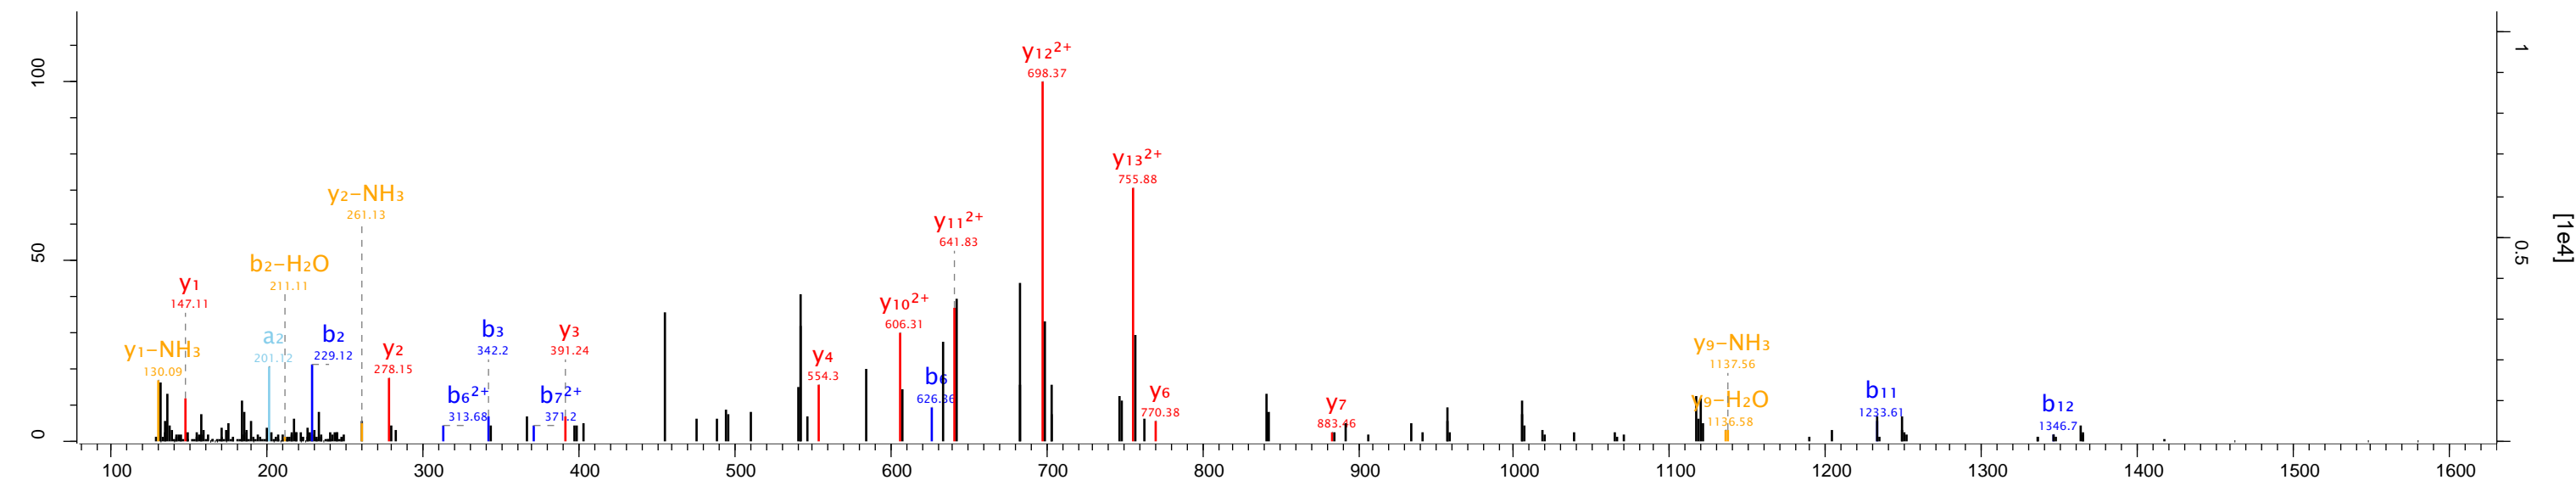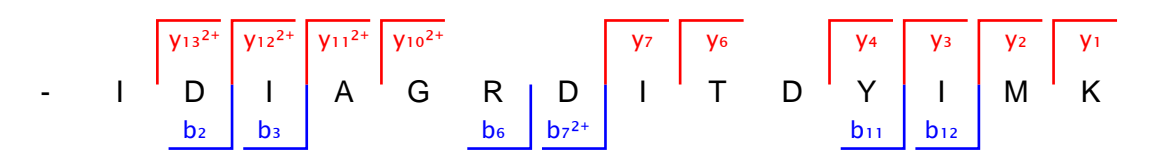

Spectral Annotation for Single-Peptide IDs between Single D11 Cells using Q-OT-LIT

Raw file 2015-01-08\_CL04\_Blastomere-15 Scan 32692 Method ITMS; HCD Score 65.29 m/z 542.28

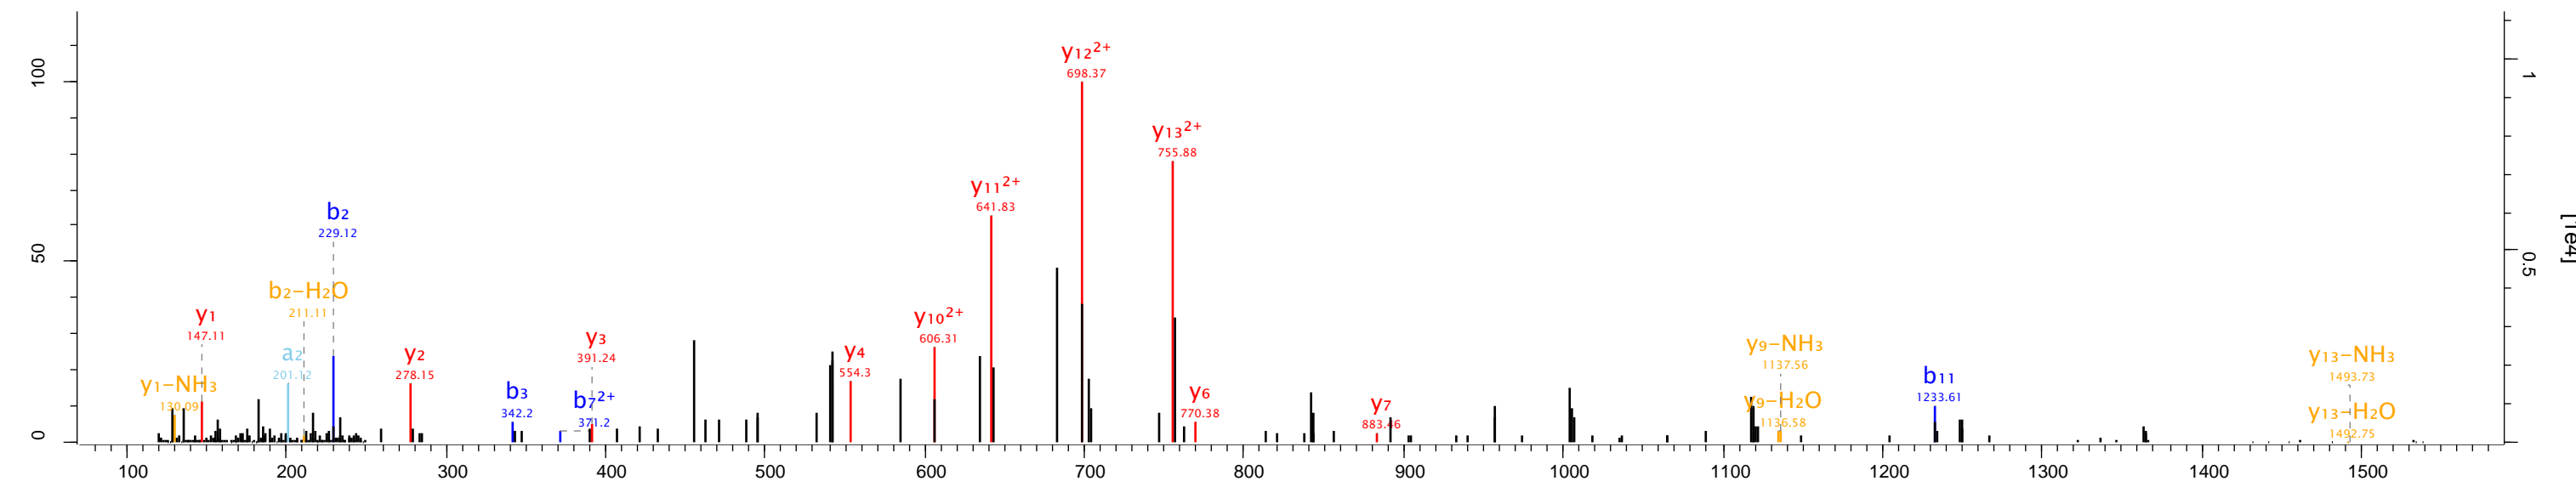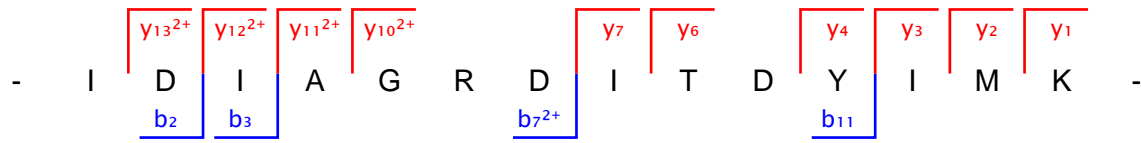

Spectral Annotation for Single-Peptide IDs between Single D11 Cells using Q-OT-LIT

Raw file 2015-01-08\_CL04\_Blastomere-15 Scan 32782 Method ITMS; HCD Score 58.32 m/z 812.42

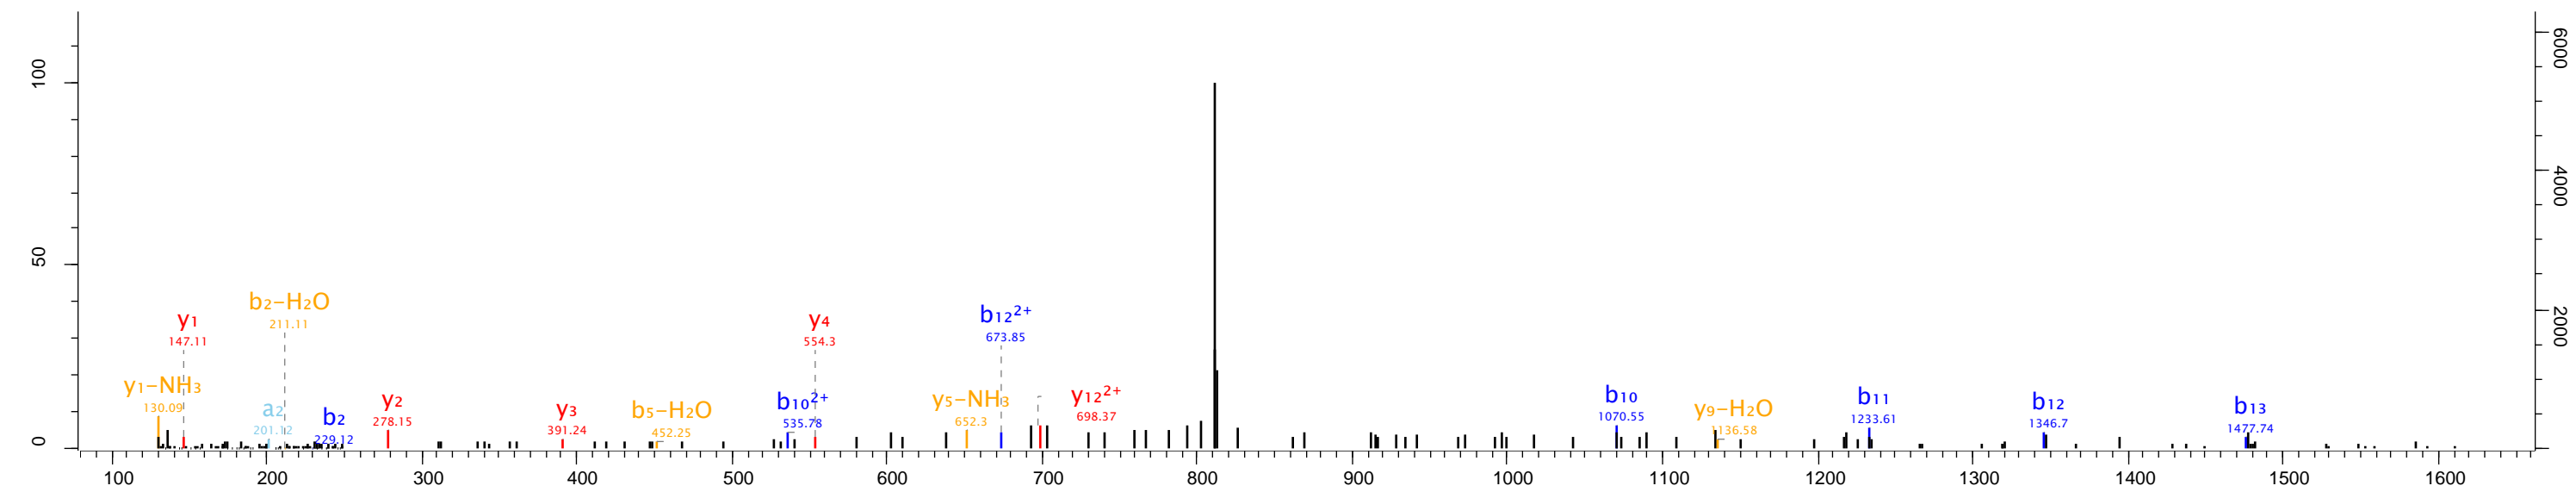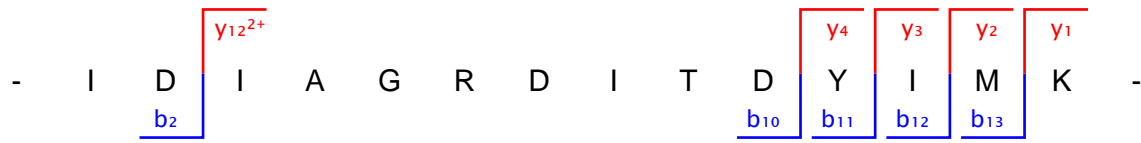

Spectral Annotation for Single-Peptide IDs between Single D11 Cells using Q-OT-LIT



Raw file 2015-01-08\_CL04\_Blastomere-15 Scan 32789 Method ITMS; HCD Score 70.68 m/z 523.64

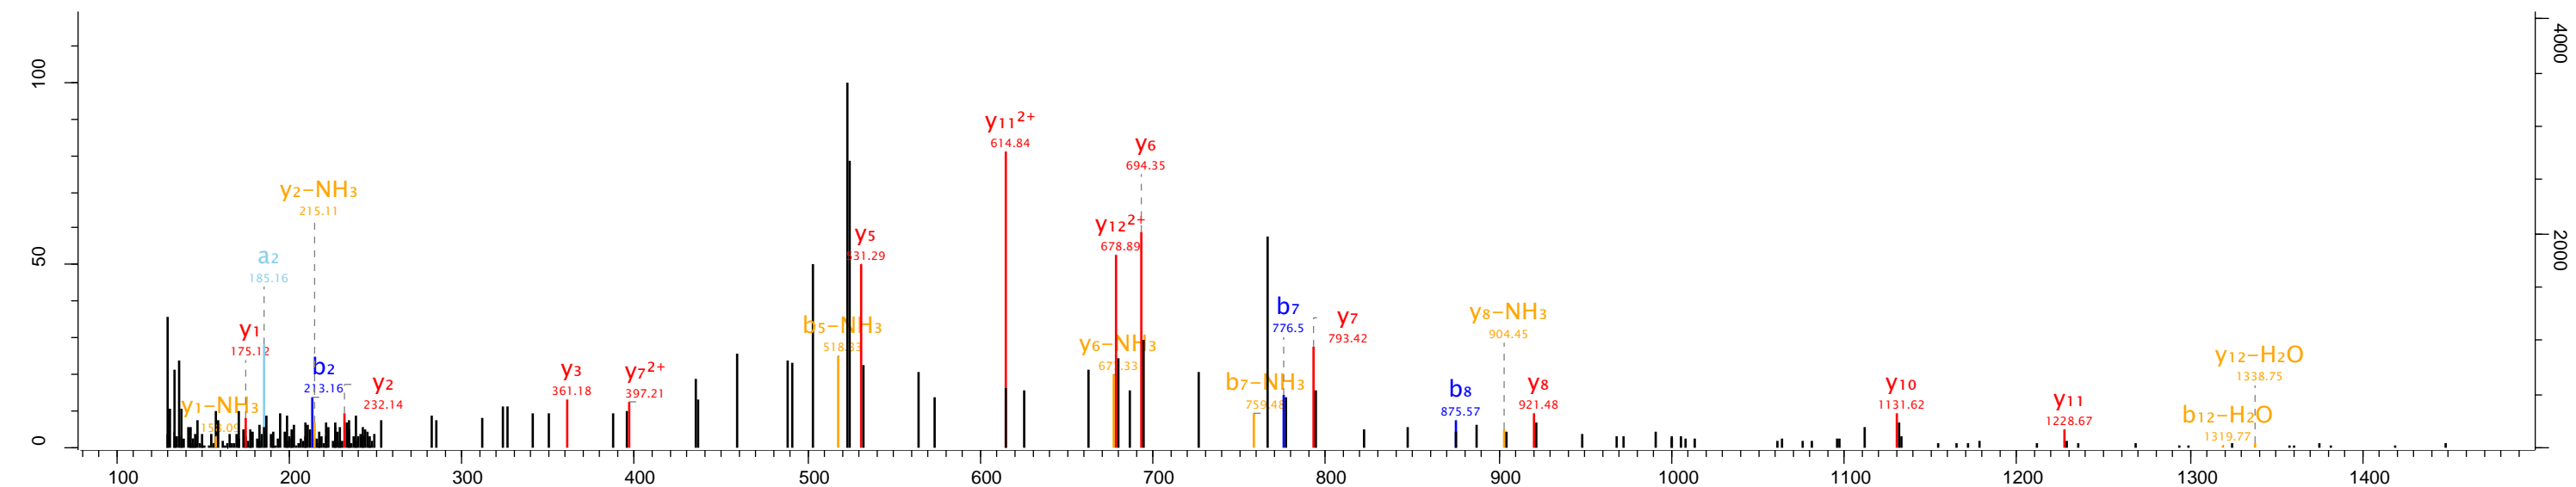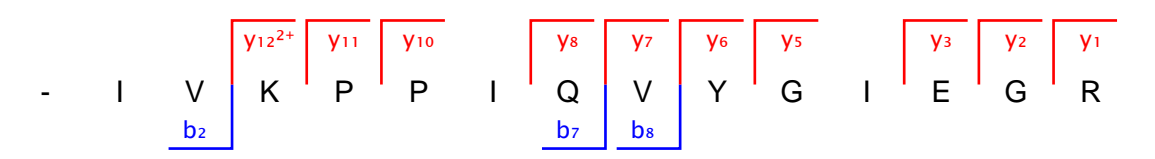

Spectral Annotation for Single-Peptide IDs between Single D11 Cells using Q-OT-LIT

Raw file 2015-01-08\_CL04\_Blastomere-15 Scan 32809 Method ITMS; HCD Score 41.91 m/z 756.35

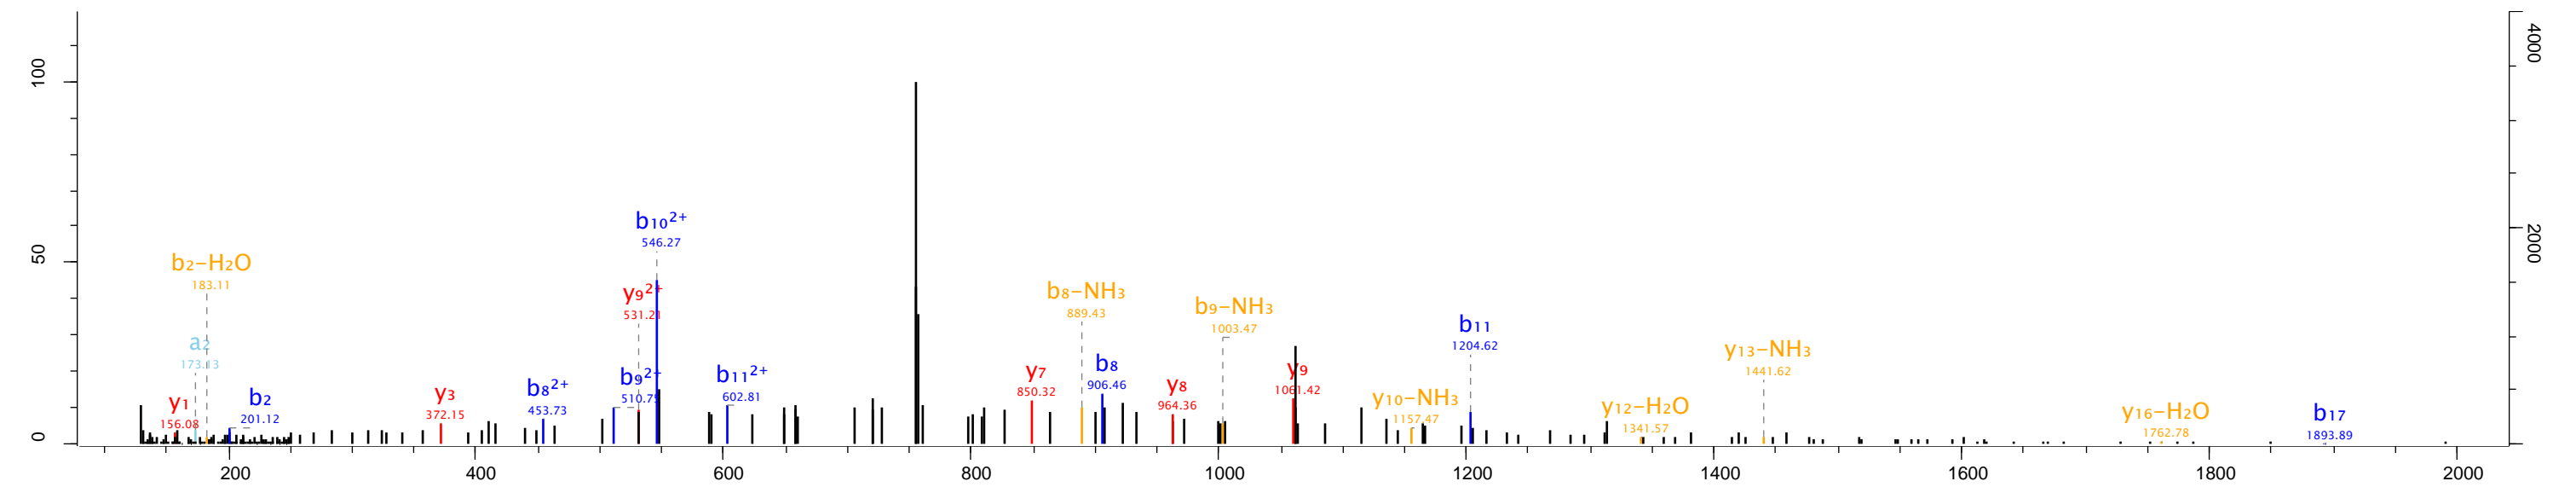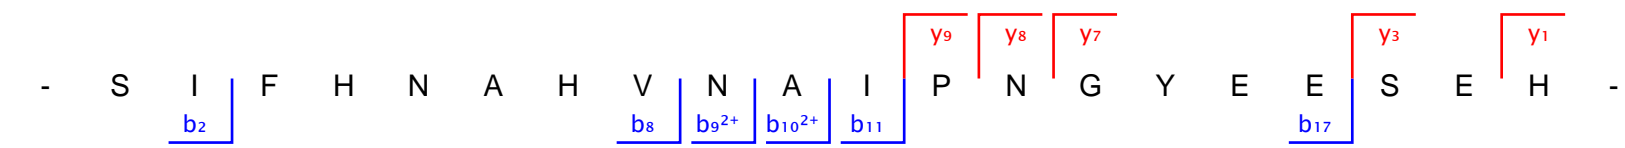

Raw file 2015-01-08\_CL04\_Blastomere-15 Scan 32844 Method ITMS; HCD Score 64.8 m/z 496.94

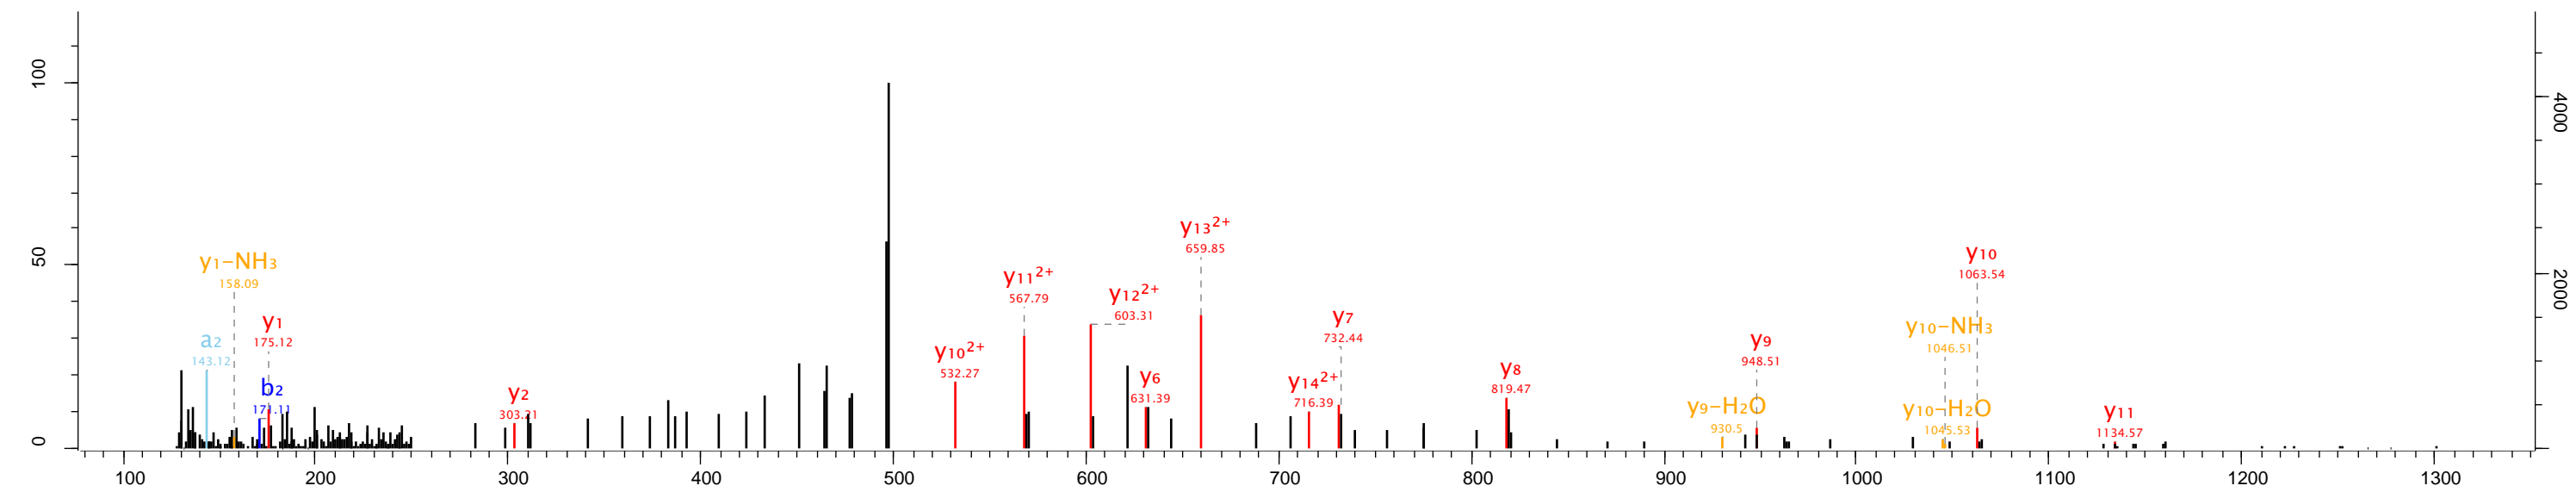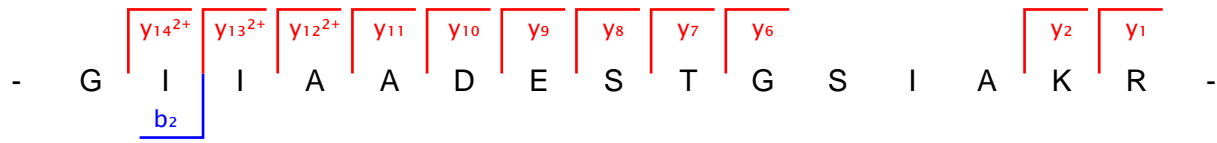

Spectral Annotation for Single-Peptide IDs between Single D11 Cells using Q-OT-LIT

Raw file 2015-01-08\_CL04\_Blastomere-15 Scan 32848 Method ITMS; HCD Score 43.9 m/z 520.27

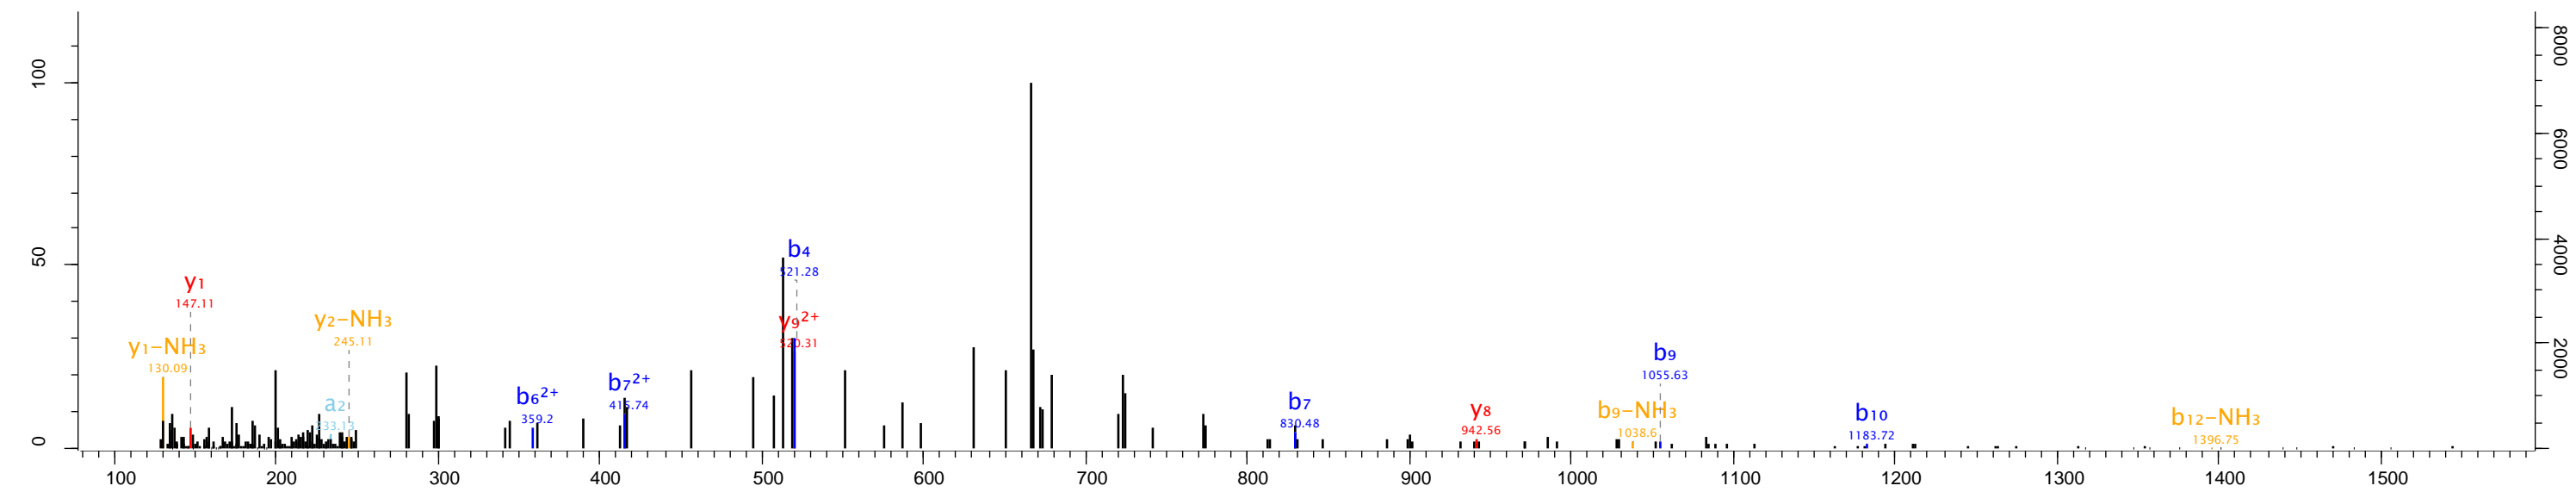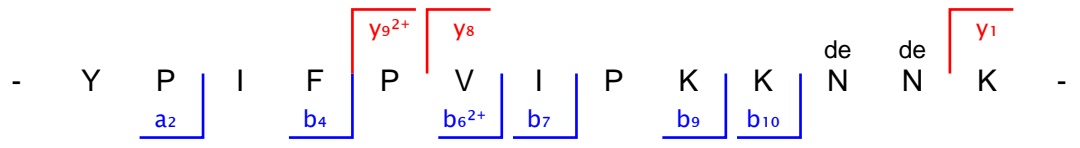

Spectral Annotation for Single-Peptide IDs between Single D11 Cells using Q-OT-LIT

Raw file 2015-01-08\_CL04\_Blastomere-15 Scan 32851 Method ITMS; HCD Score 55.82 m/z 516.94

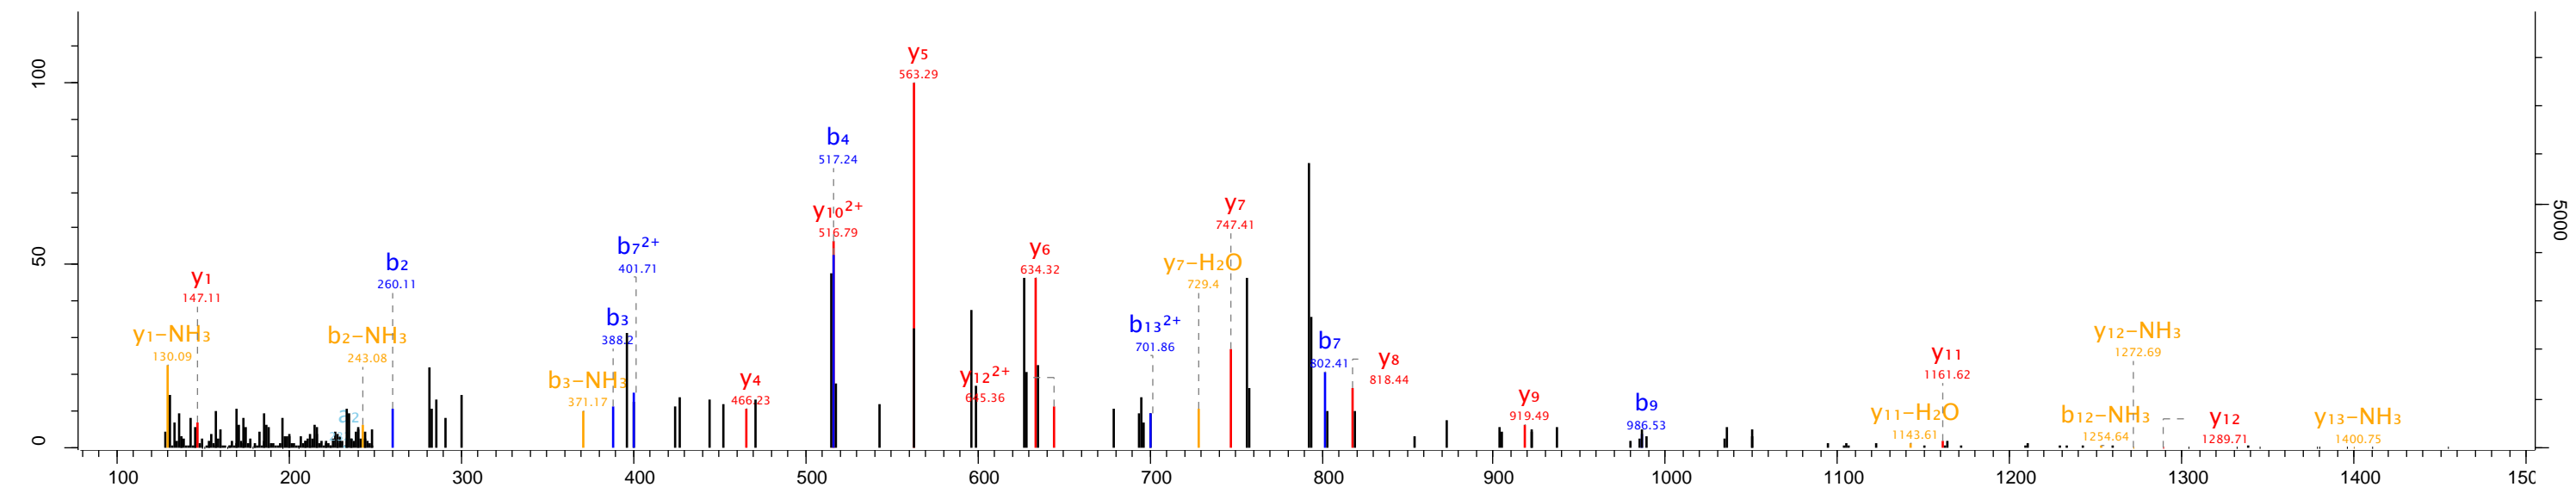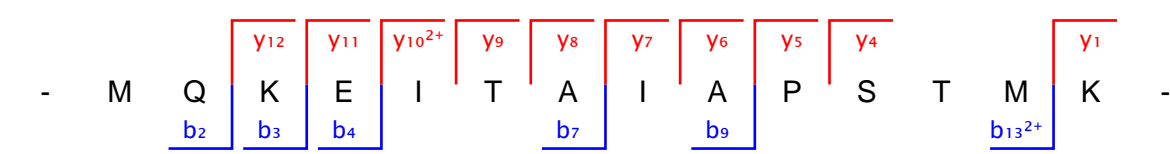

Spectral Annotation for Single-Peptide IDs between Single D11 Cells using Q-OT-LIT

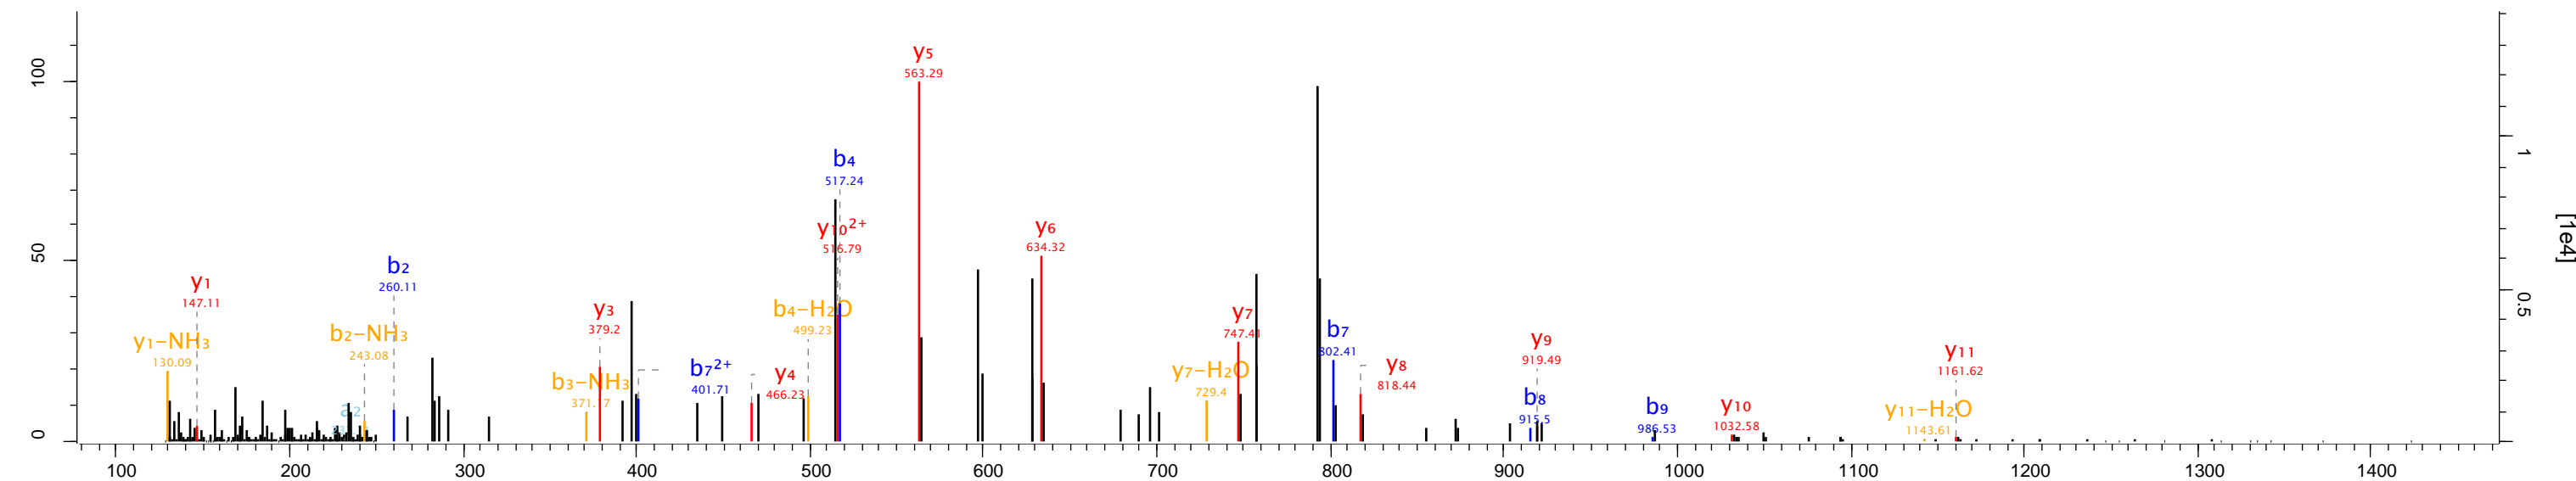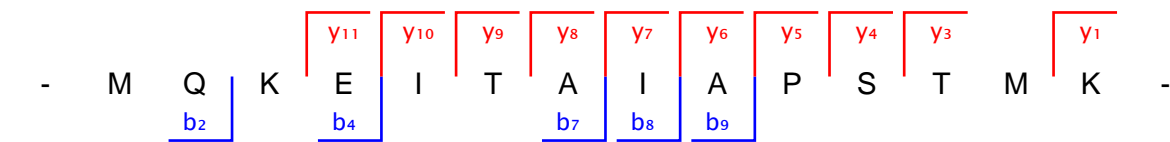

Raw file 2015-01-08\_CL04\_Blastomere-15 Scan 32935 Method ITMS; HCD Score 47.48 m/z 634.57

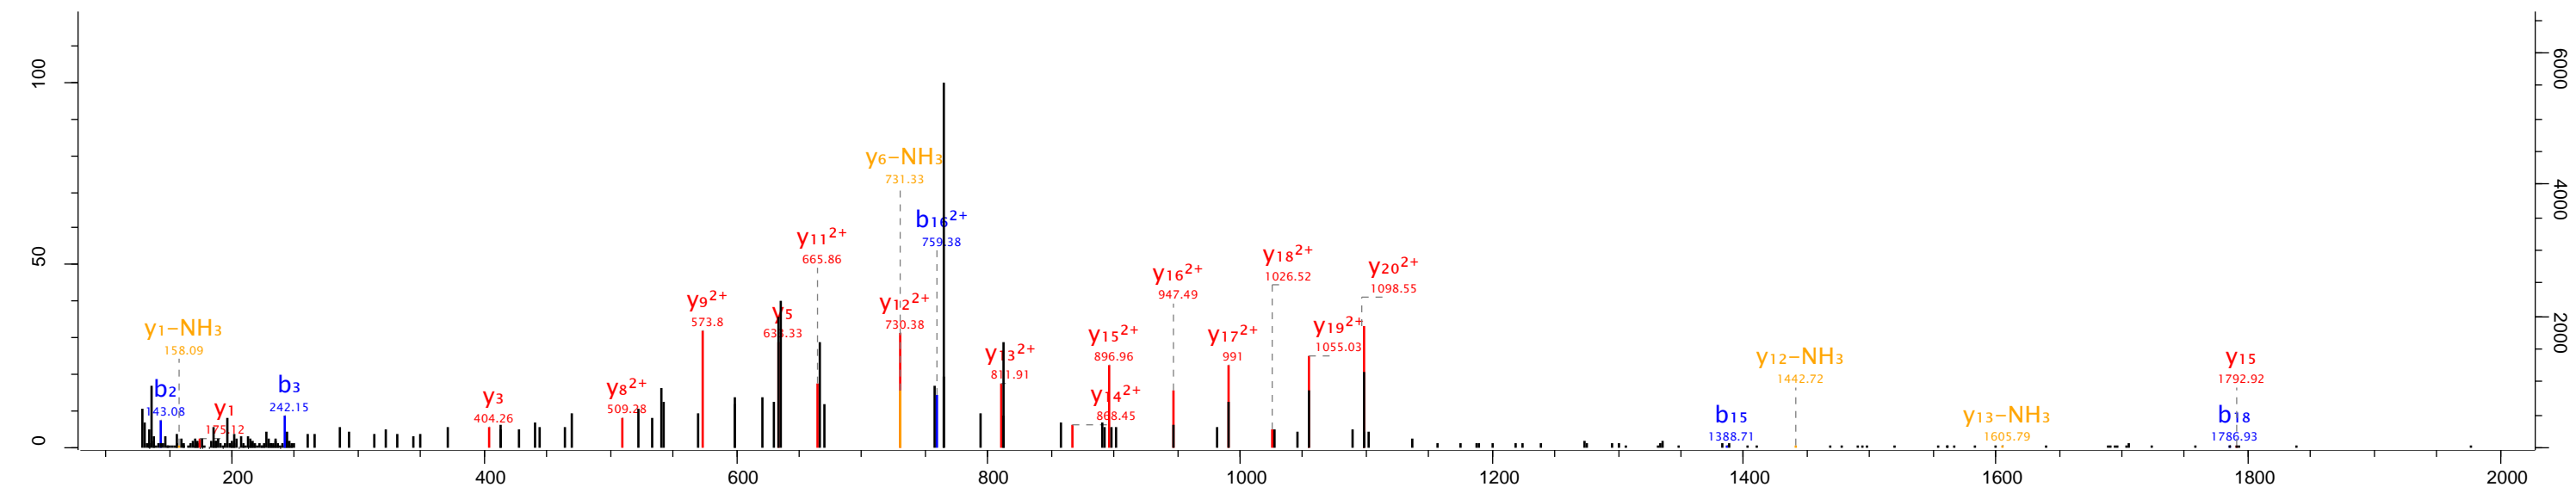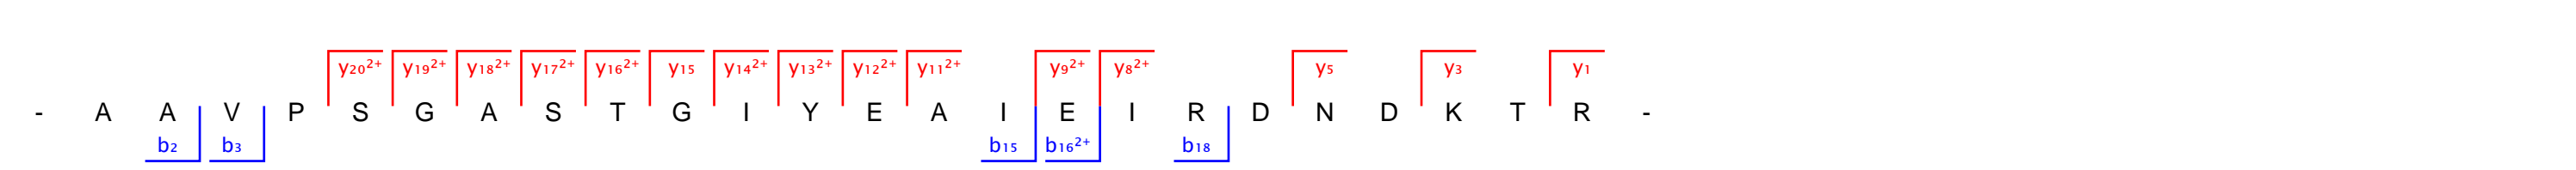

Raw file 2015-01-08\_CL04\_Blastomere-15 Scan 32937 Method ITMS; HCD Score 116.79 m/z 775.4

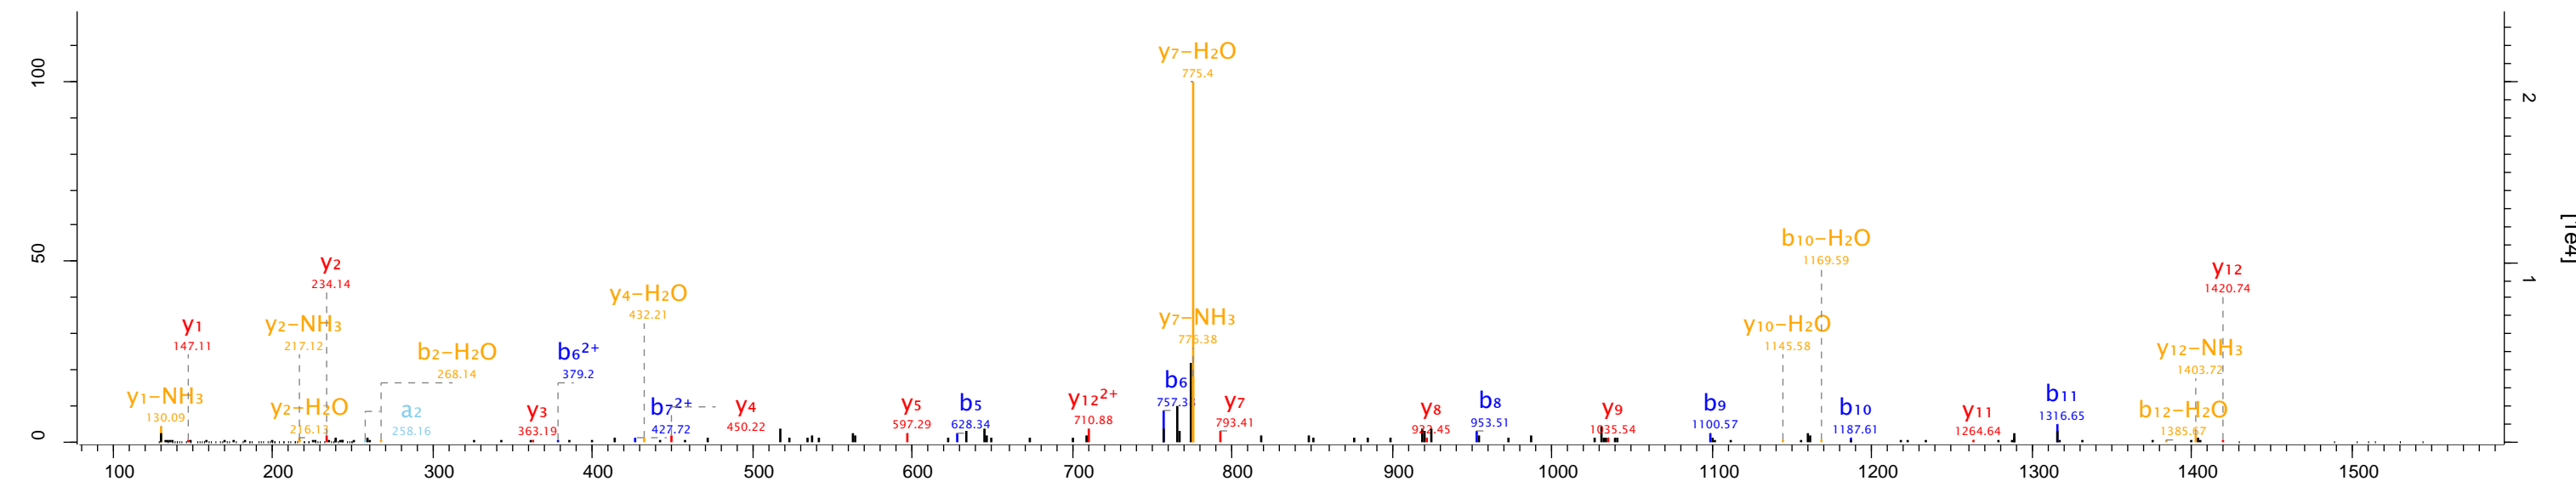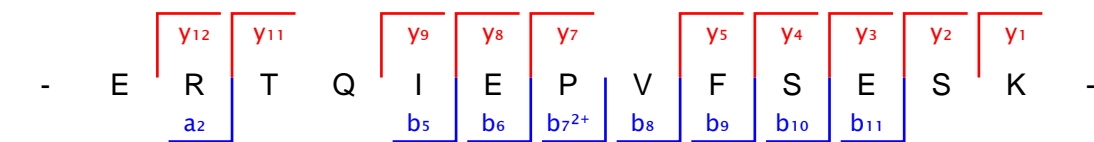

Spectral Annotation for Single-Peptide IDs between Single D11 Cells using Q-OT-LIT



Raw file 2015-01-08\_CL04\_Blastomere-15 Scan 32944 Method ITMS; HCD Score 72.21 m/z 517.26

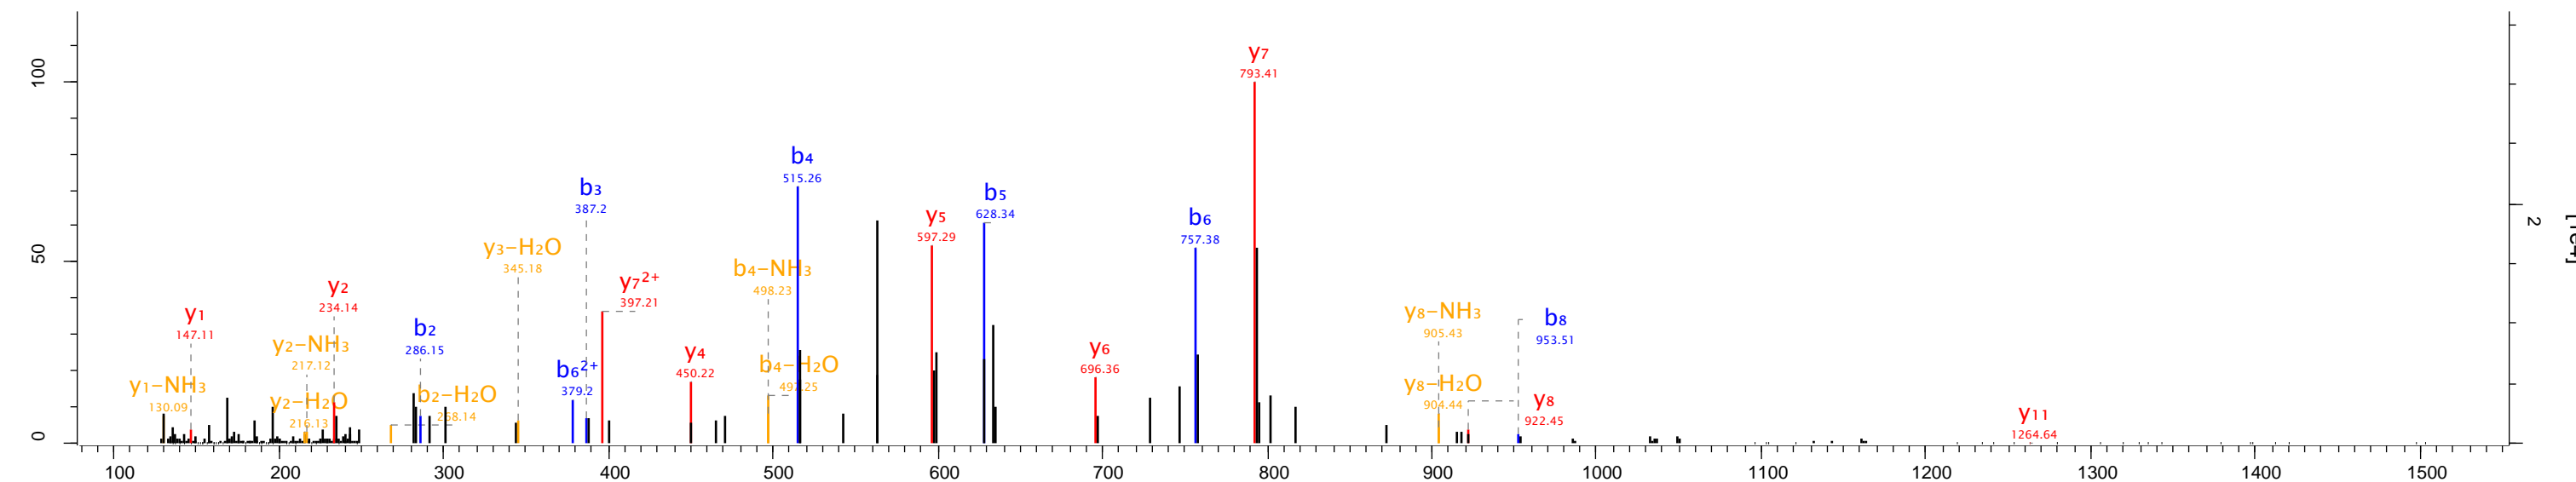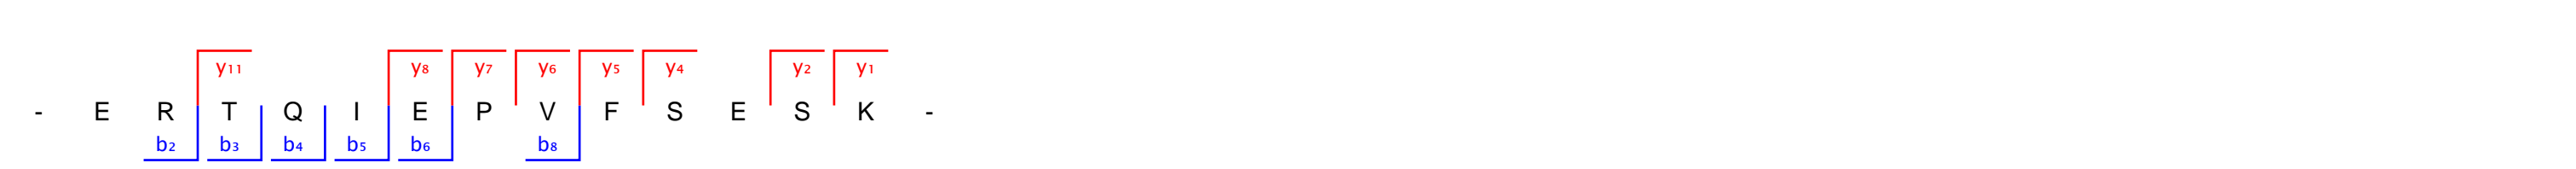

Spectral Annotation for Single-Peptide IDs between Single D11 Cells using Q-OT-LIT

Raw file 2015-01-08\_CL04\_Blastomere-15 Scan 32963 Method ITMS; HCD Score 118.08 m/z 775.39

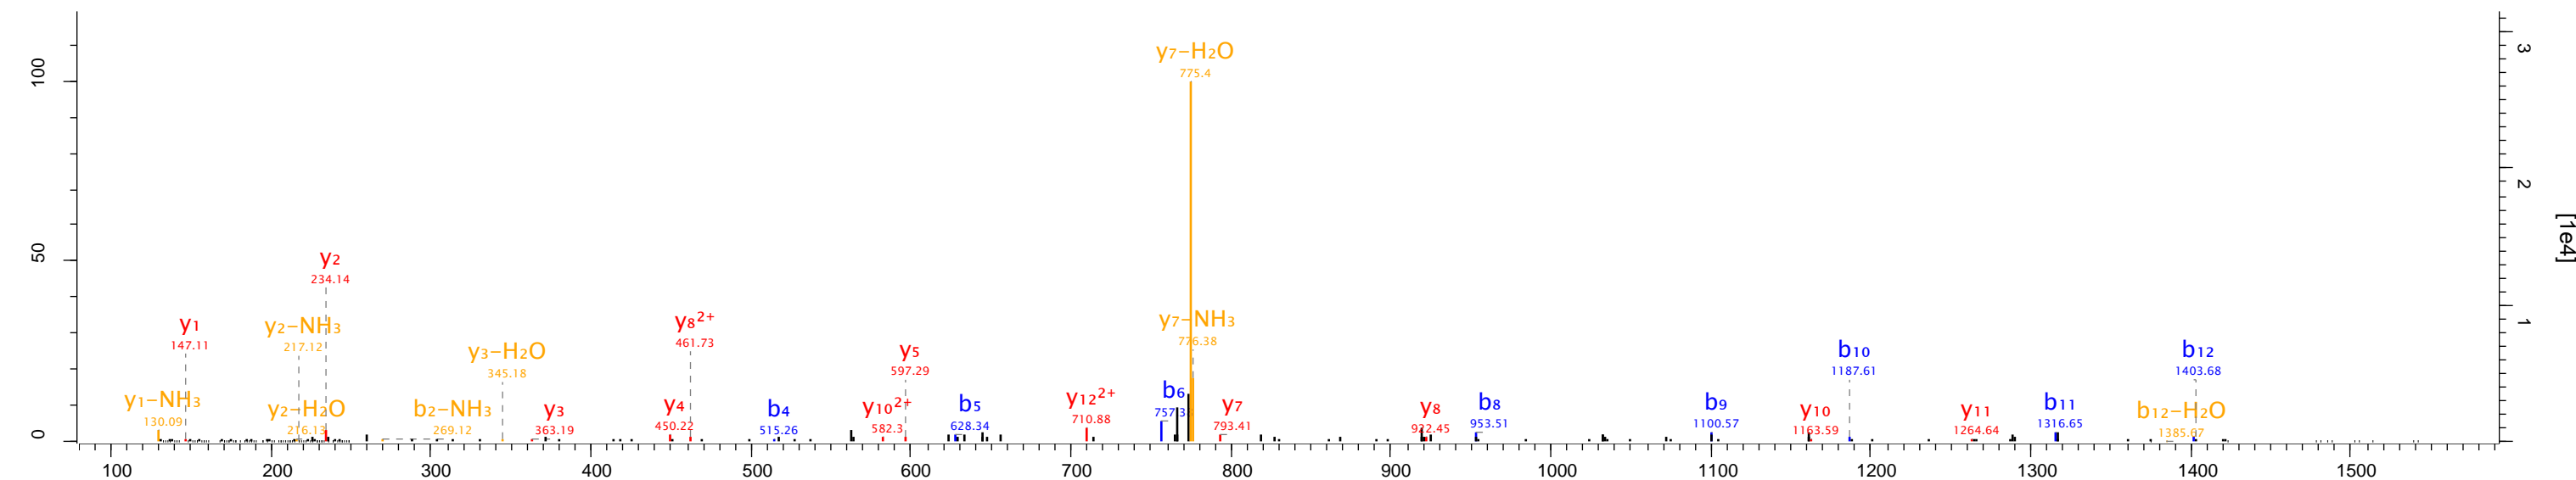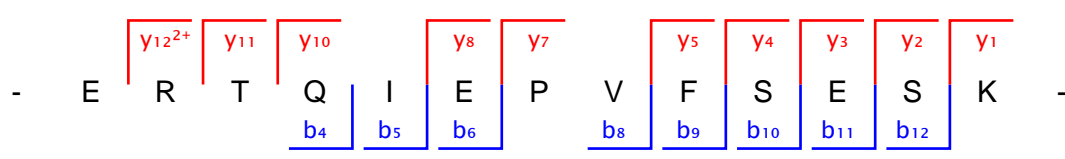

Spectral Annotation for Single-Peptide IDs between Single D11 Cells using Q-OT-LIT

Raw file 2015-01-08\_CL04\_Blastomere-15 Scan 32983 Method ITMS; HCD Score 71.03 m/z 519.92

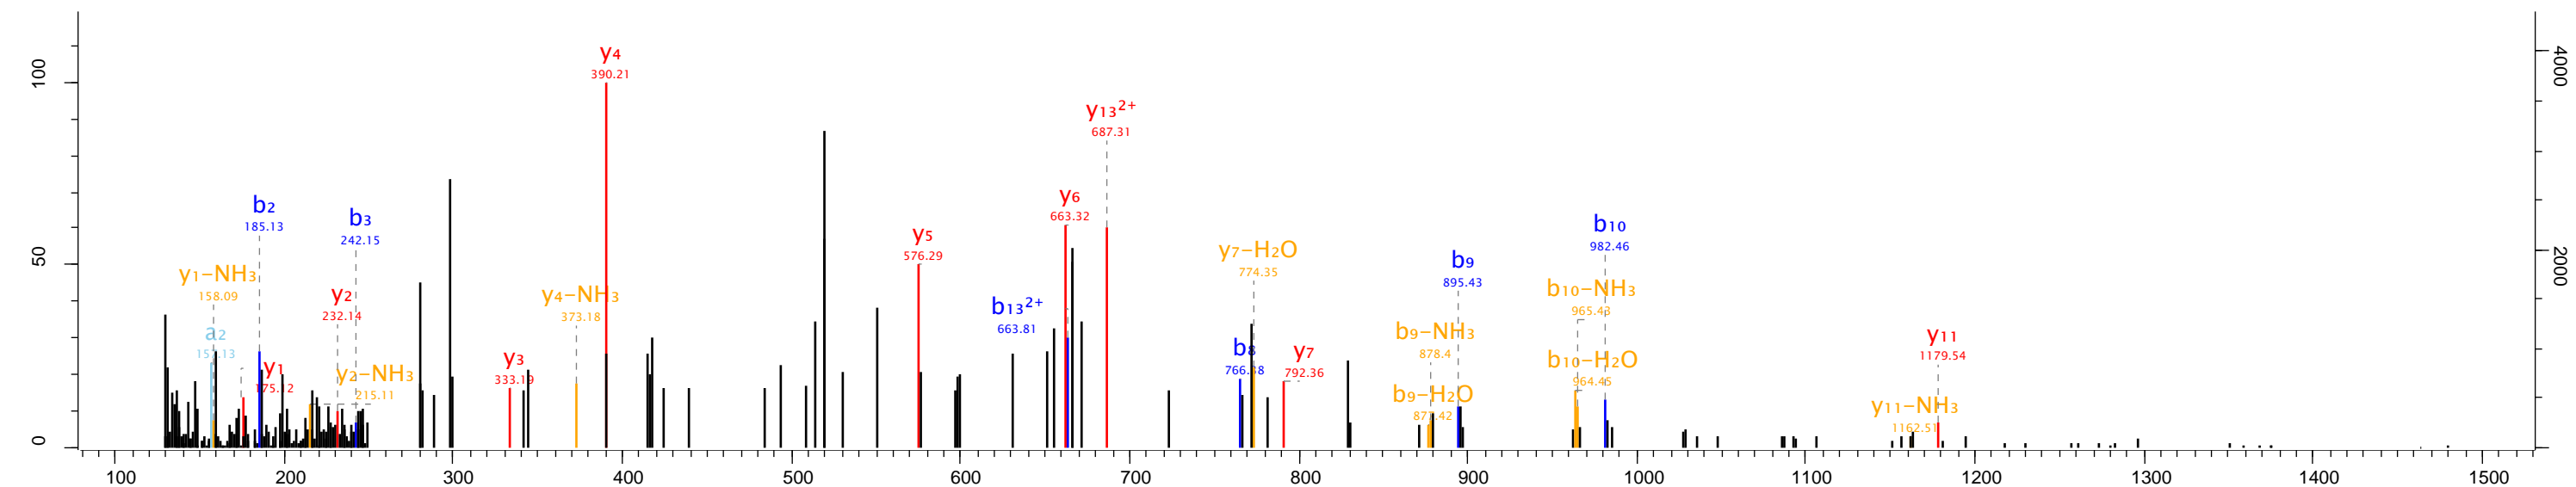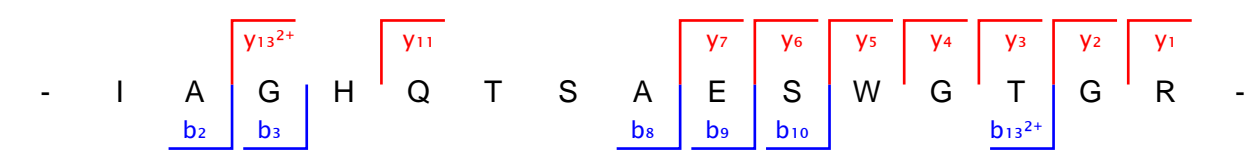

Spectral Annotation for Single-Peptide IDs between Single D11 Cells using Q-OT-LIT

Raw file 2015-01-08\_CL04\_Blastomere-15 Scan 33002 Method ITMS; HCD Score 64.41 m/z 520.25

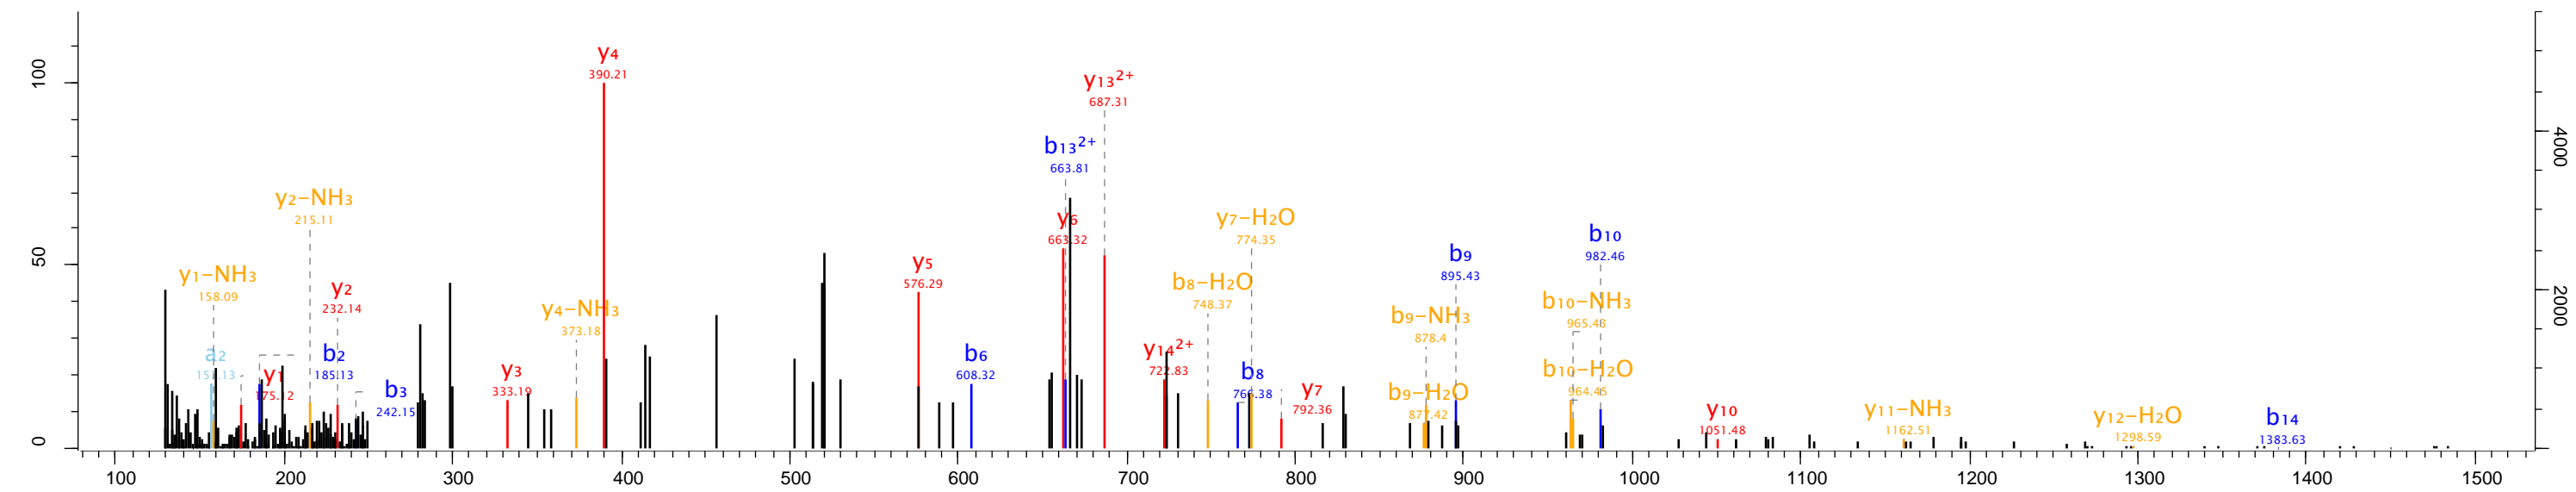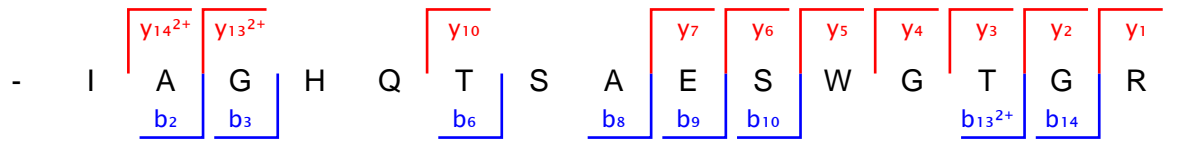

Spectral Annotation for Single-Peptide IDs between Single D11 Cells using Q-OT-LIT

Raw file 2015-01-08\_CL04\_Blastomere-15 Scan 33025 Method ITMS; HCD Score 65.47 m/z 519.92

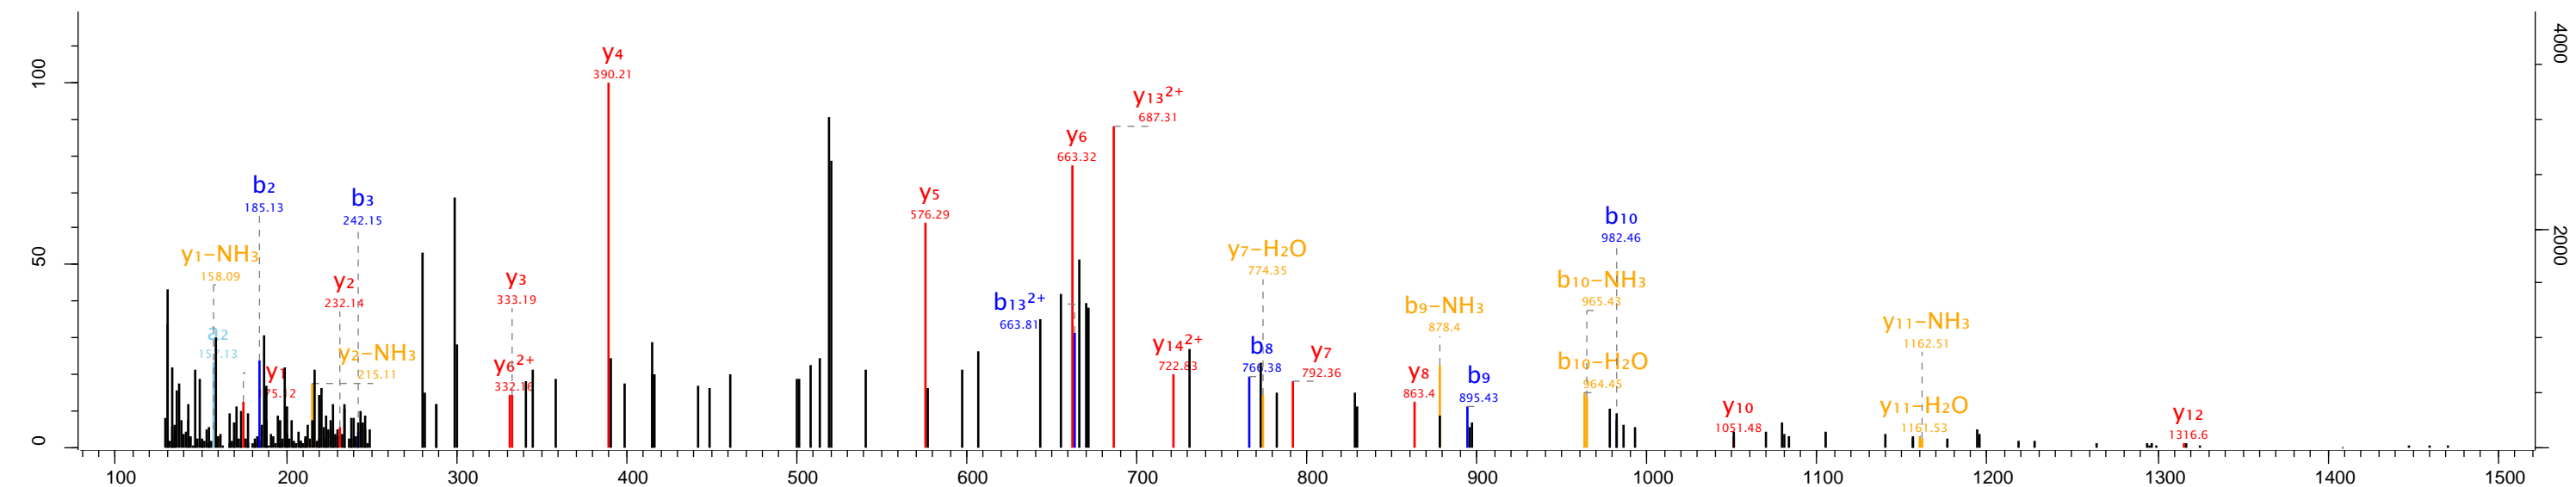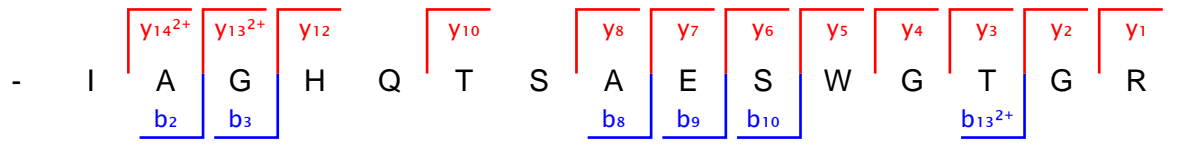

Spectral Annotation for Single-Peptide IDs between Single D11 Cells using Q-OT-LIT

Raw file 2015-01-08\_CL04\_Blastomere-15 Scan 33042 Method ITMS; HCD Score 69.43 m/z 520.25

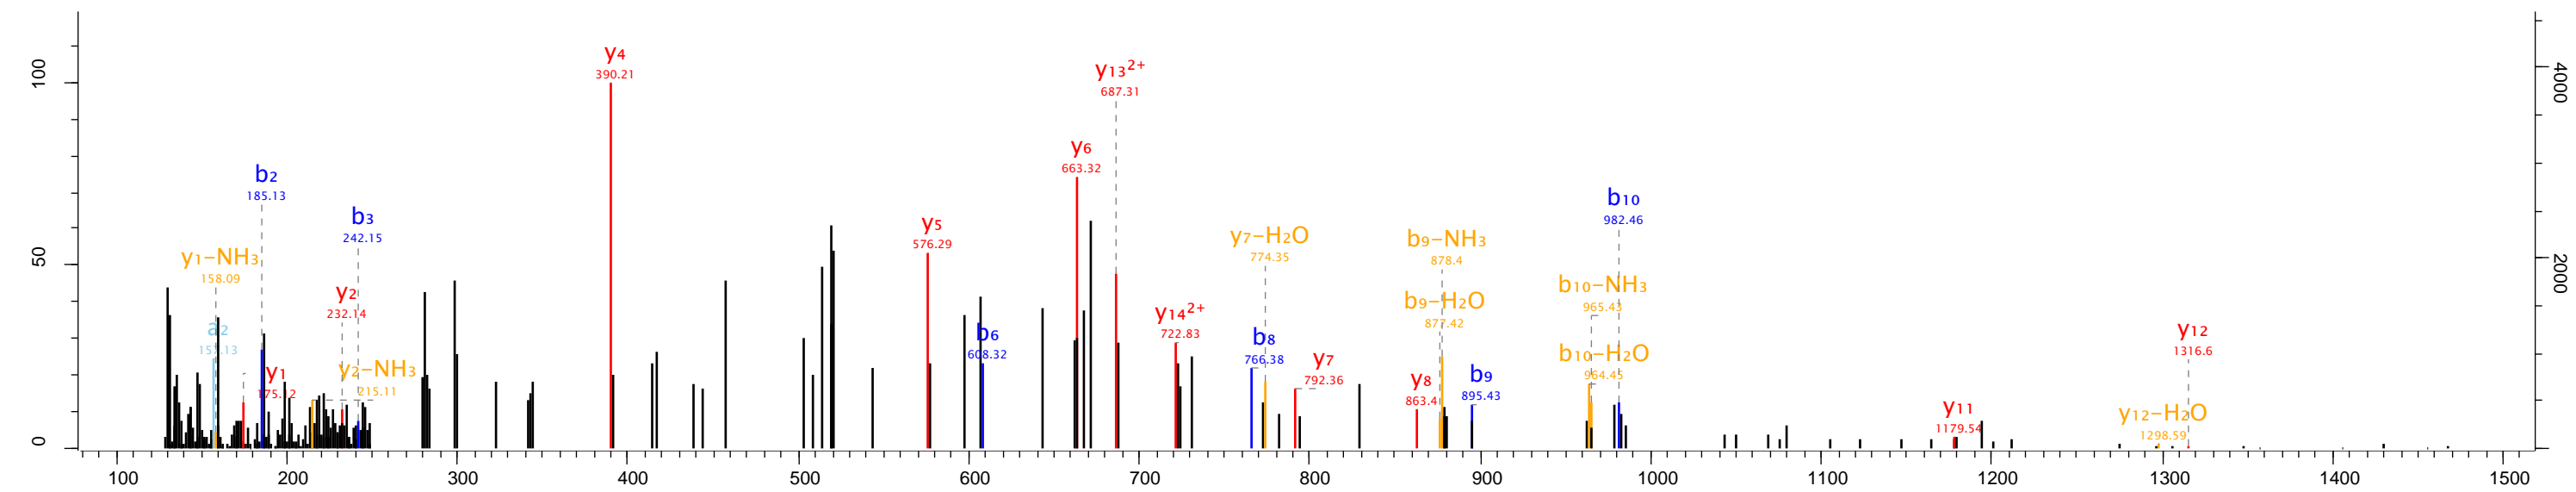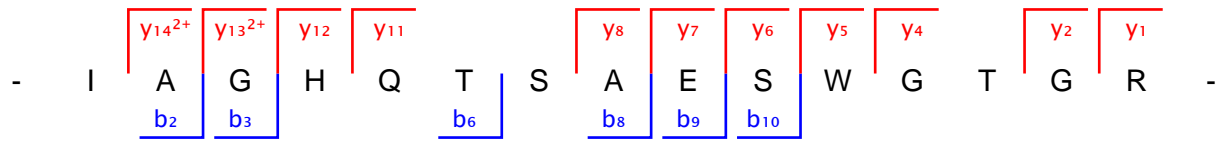

Spectral Annotation for Single-Peptide IDs between Single D11 Cells using Q-OT-LIT

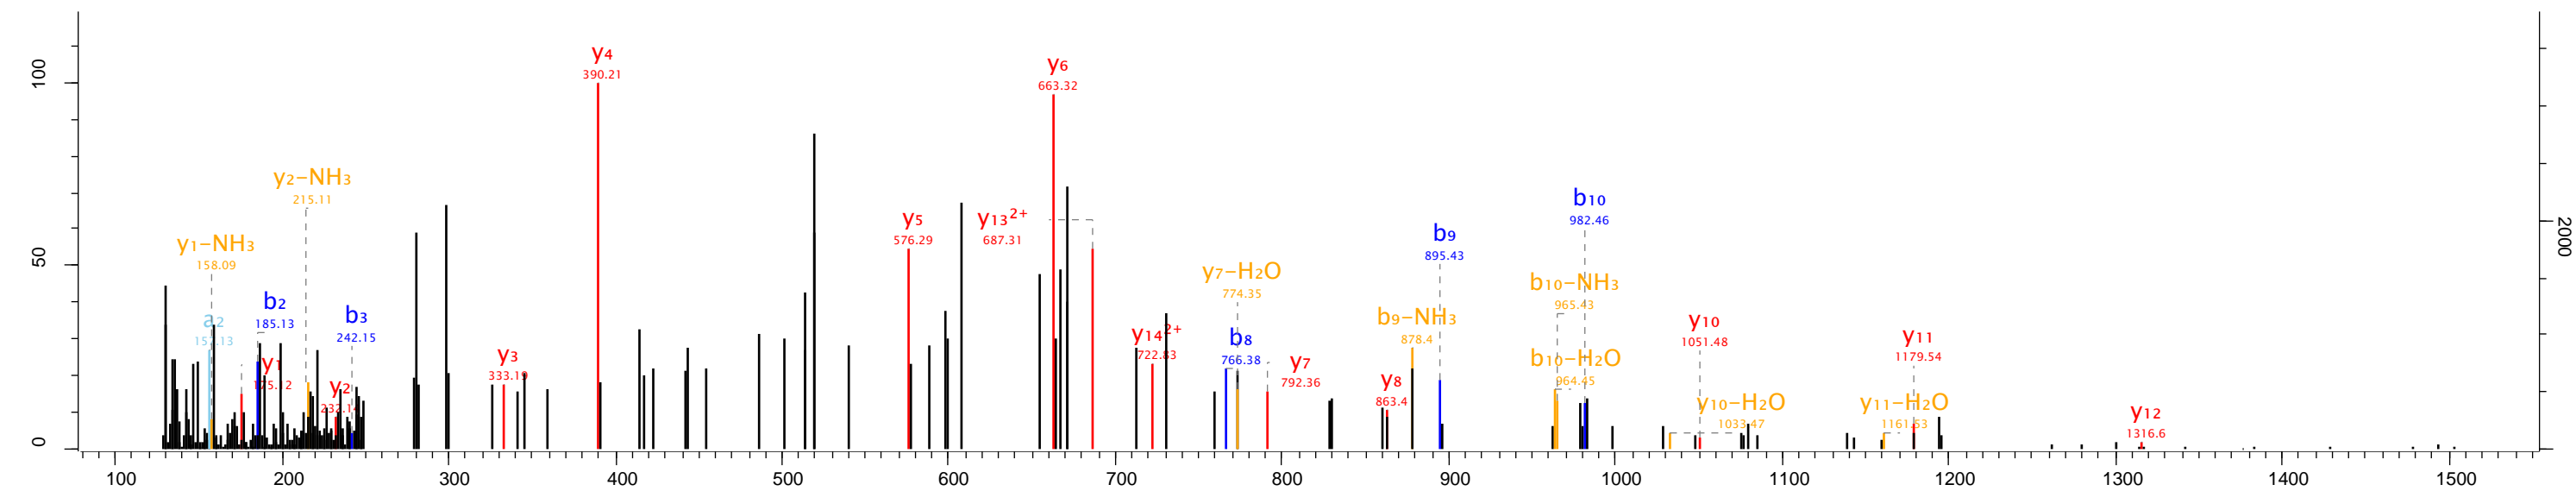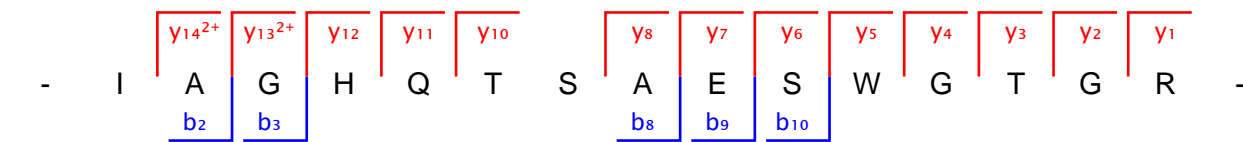

Raw file 2015-01-08\_CL04\_Blastomere-15 Scan 33096 Method ITMS; HCD Score 50.11 m/z 497.27

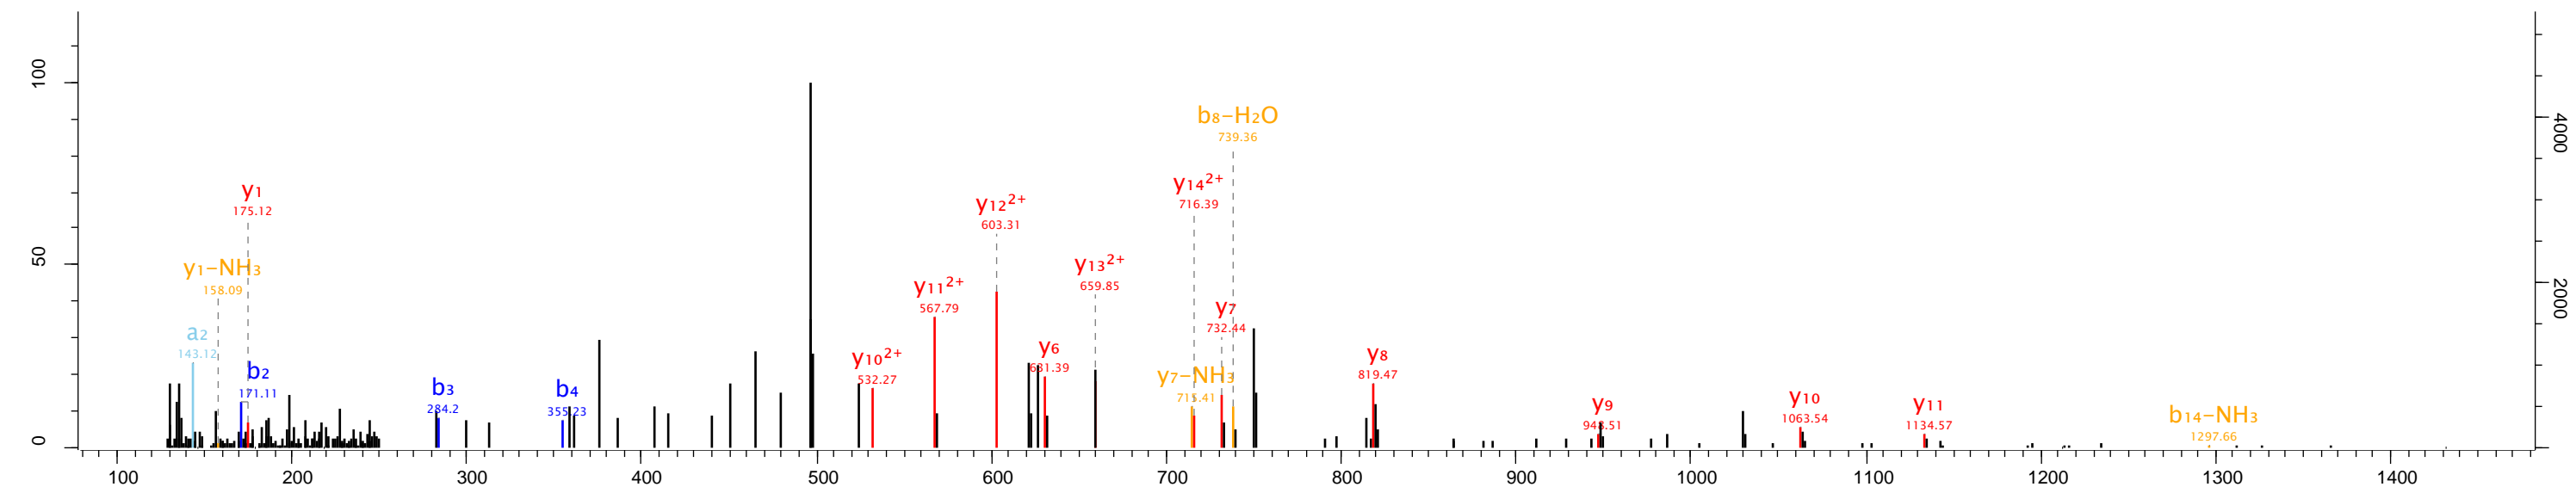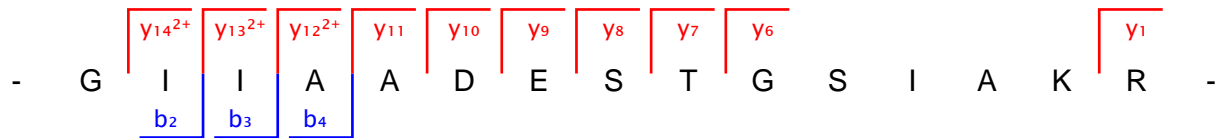

Spectral Annotation for Single-Peptide IDs between Single D11 Cells using Q-OT-LIT



Raw file 2015-01-08\_CL04\_Blastomere-15 Scan 33117 Method ITMS; HCD Score 50.81 m/z 496.94

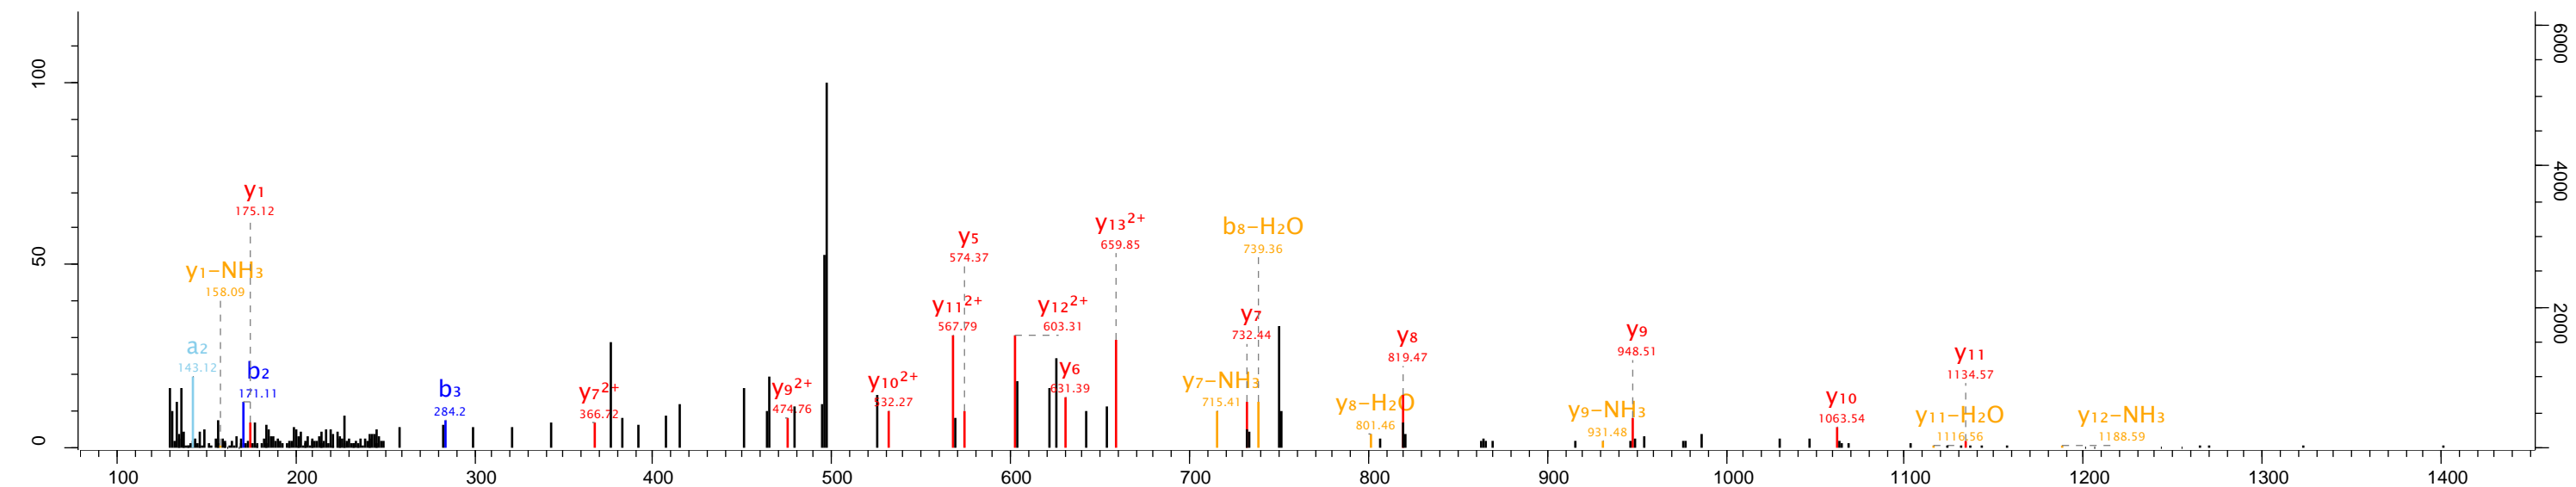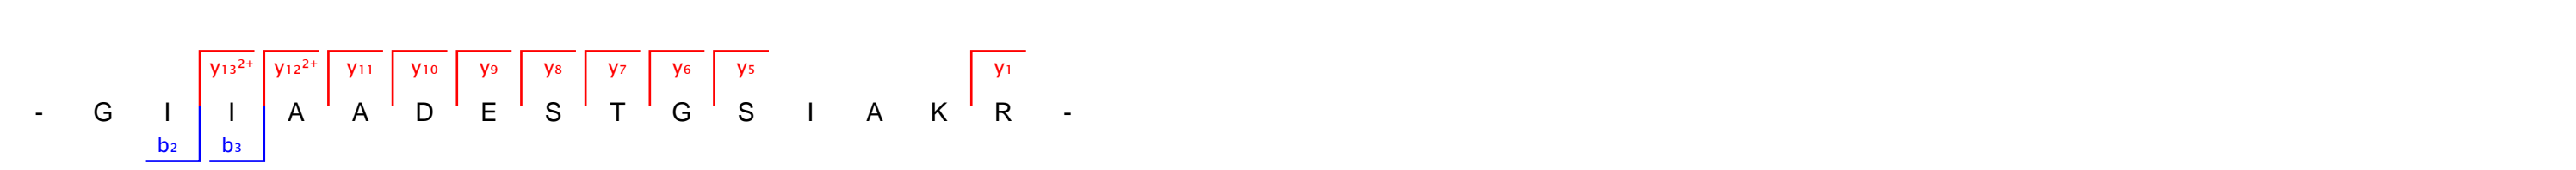

Raw file 2015-01-08\_CL04\_Blastomere-15  
 Scan 33138 Method ITMS; HCD Score 56.72 m/z 634.57

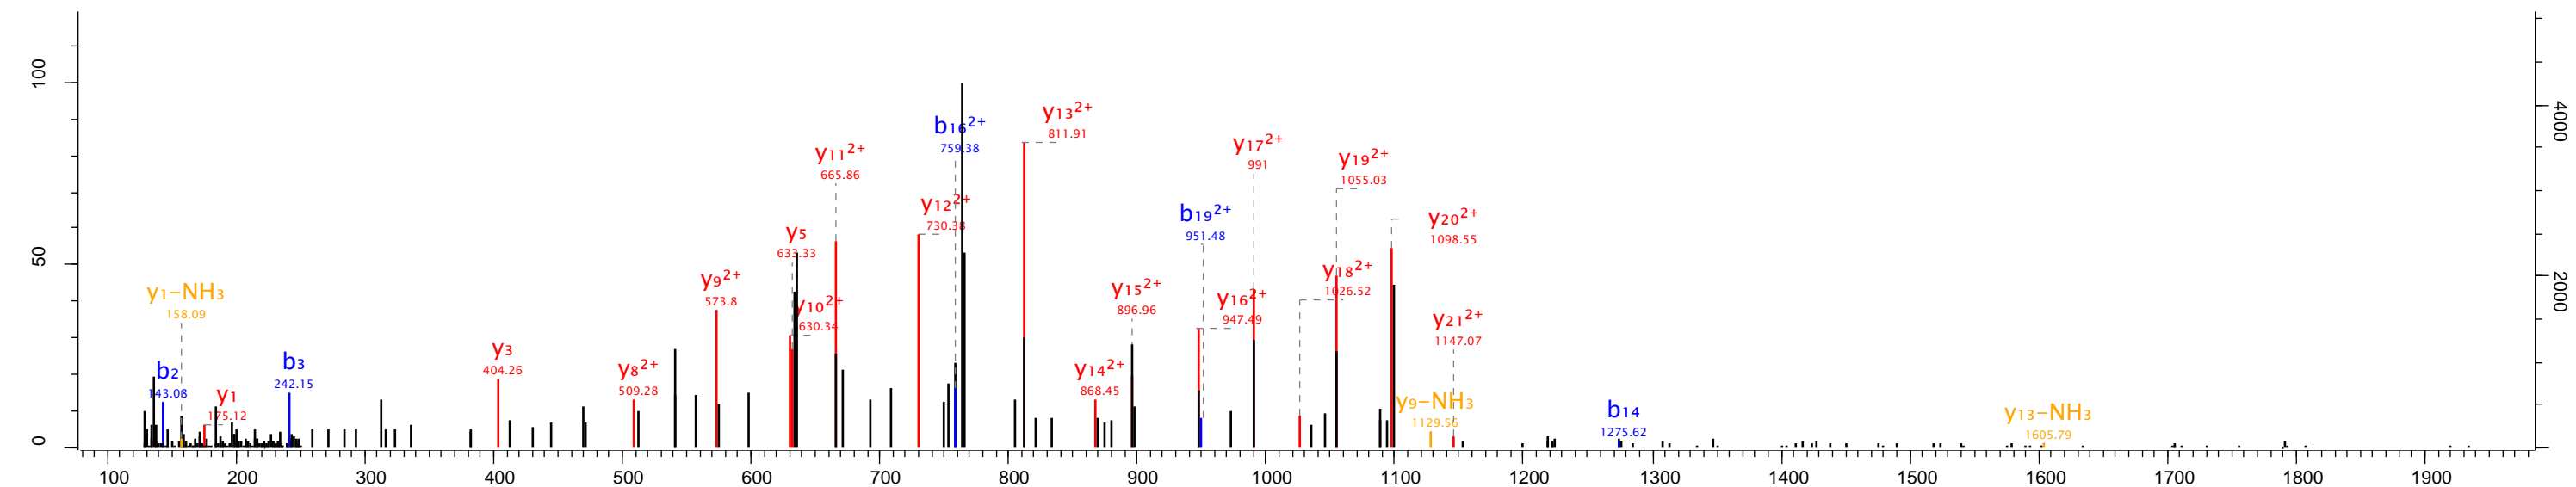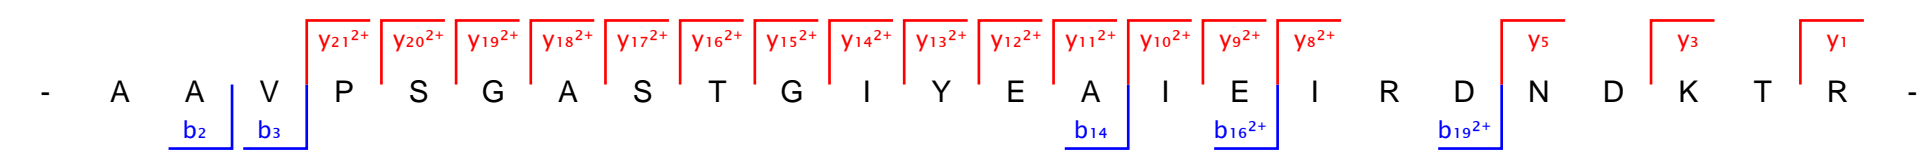

Spectral Annotation for Single-Peptide IDs between Single D11 Cells using Q-OT-LIT

Raw file 2015-01-08\_CL04\_Blastomere-15 Scan 33381 Method ITMS; HCD Score 58.32 m/z 523.64

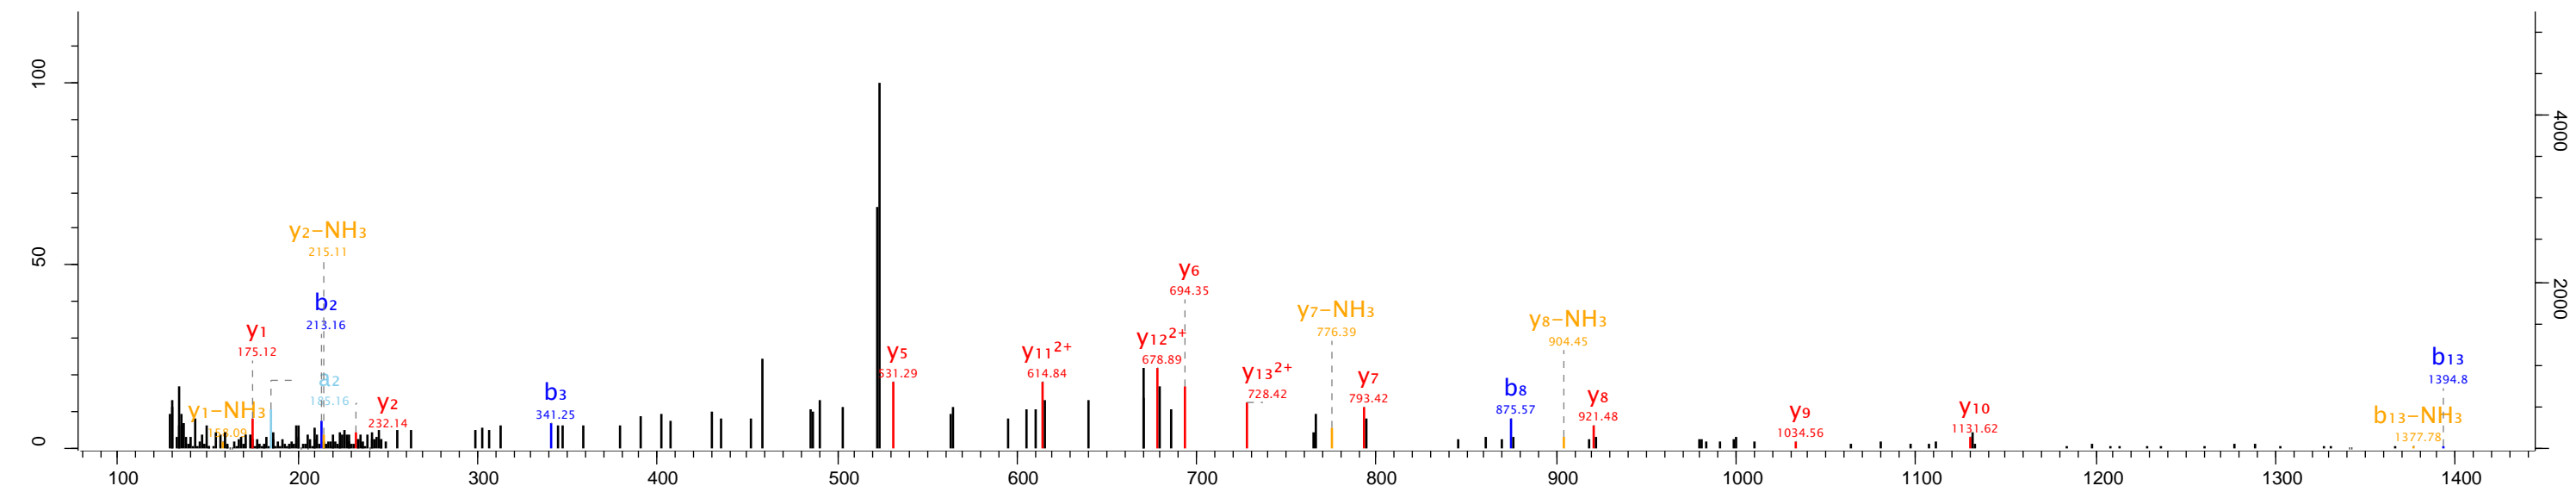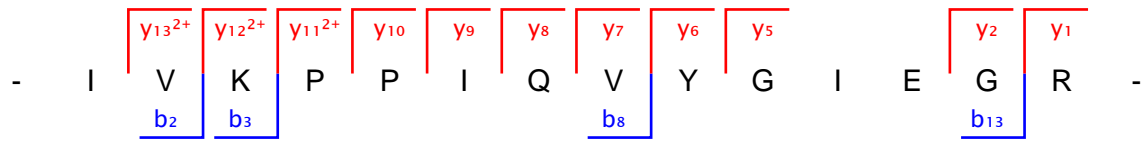

Spectral Annotation for Single-Peptide IDs between Single D11 Cells using Q-OT-LIT

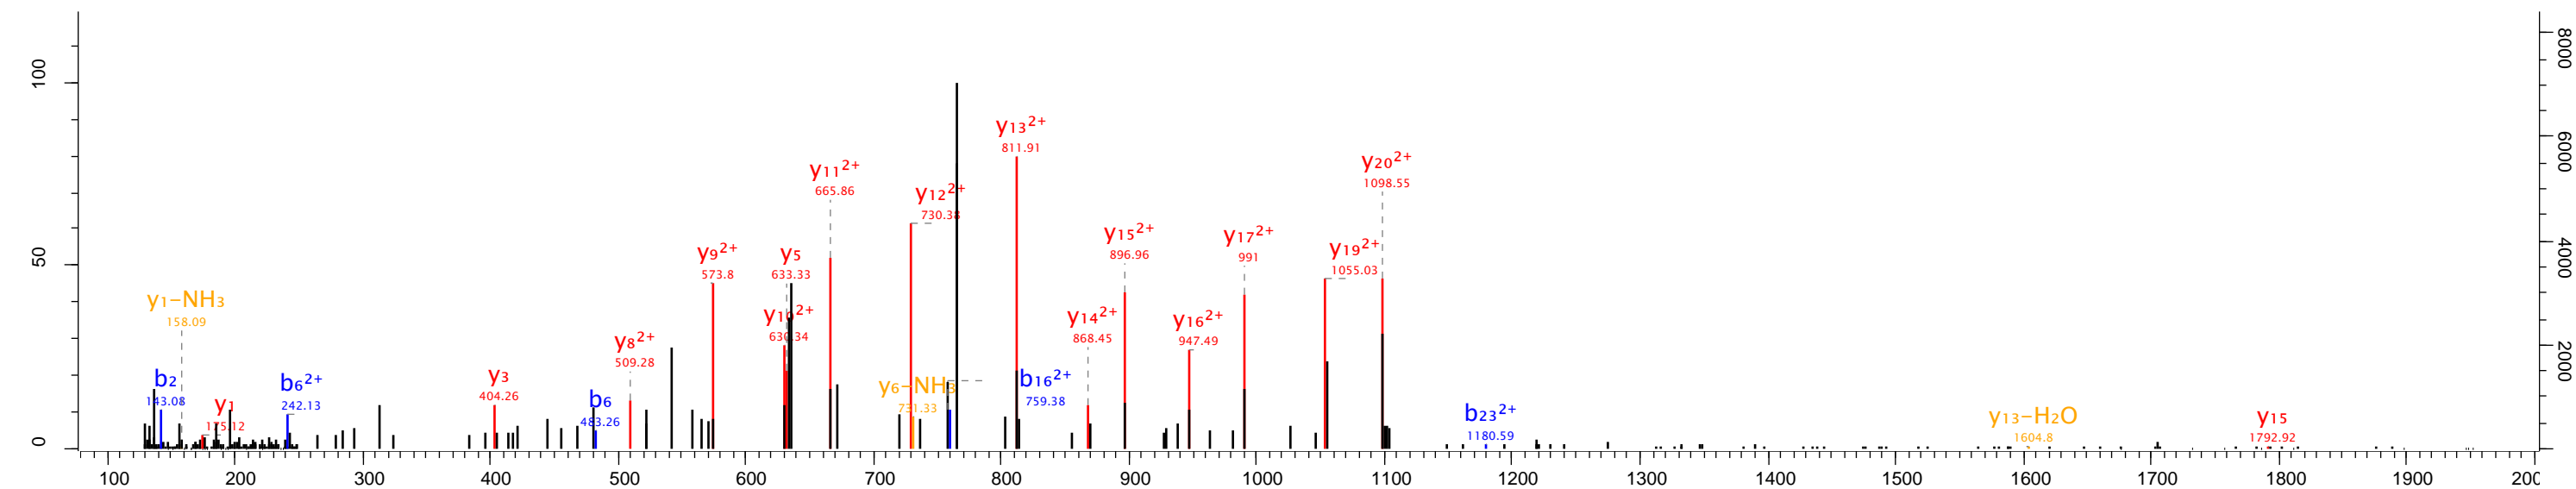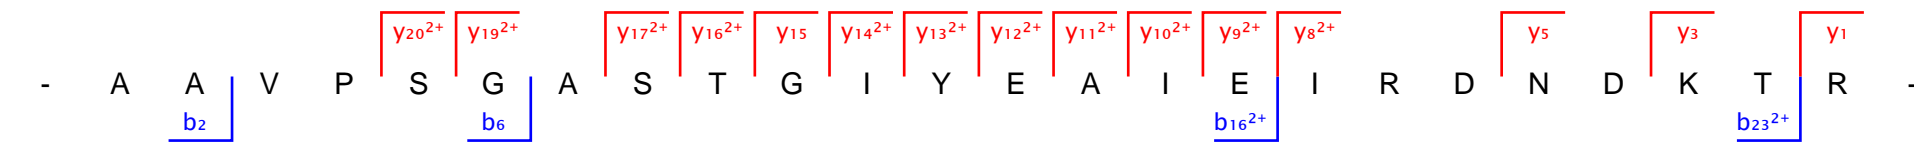

Raw file 2015-01-08\_CL04\_Blastomere-15 Scan 33424 Method ITMS; HCD Score 64.24 m/z 523.64

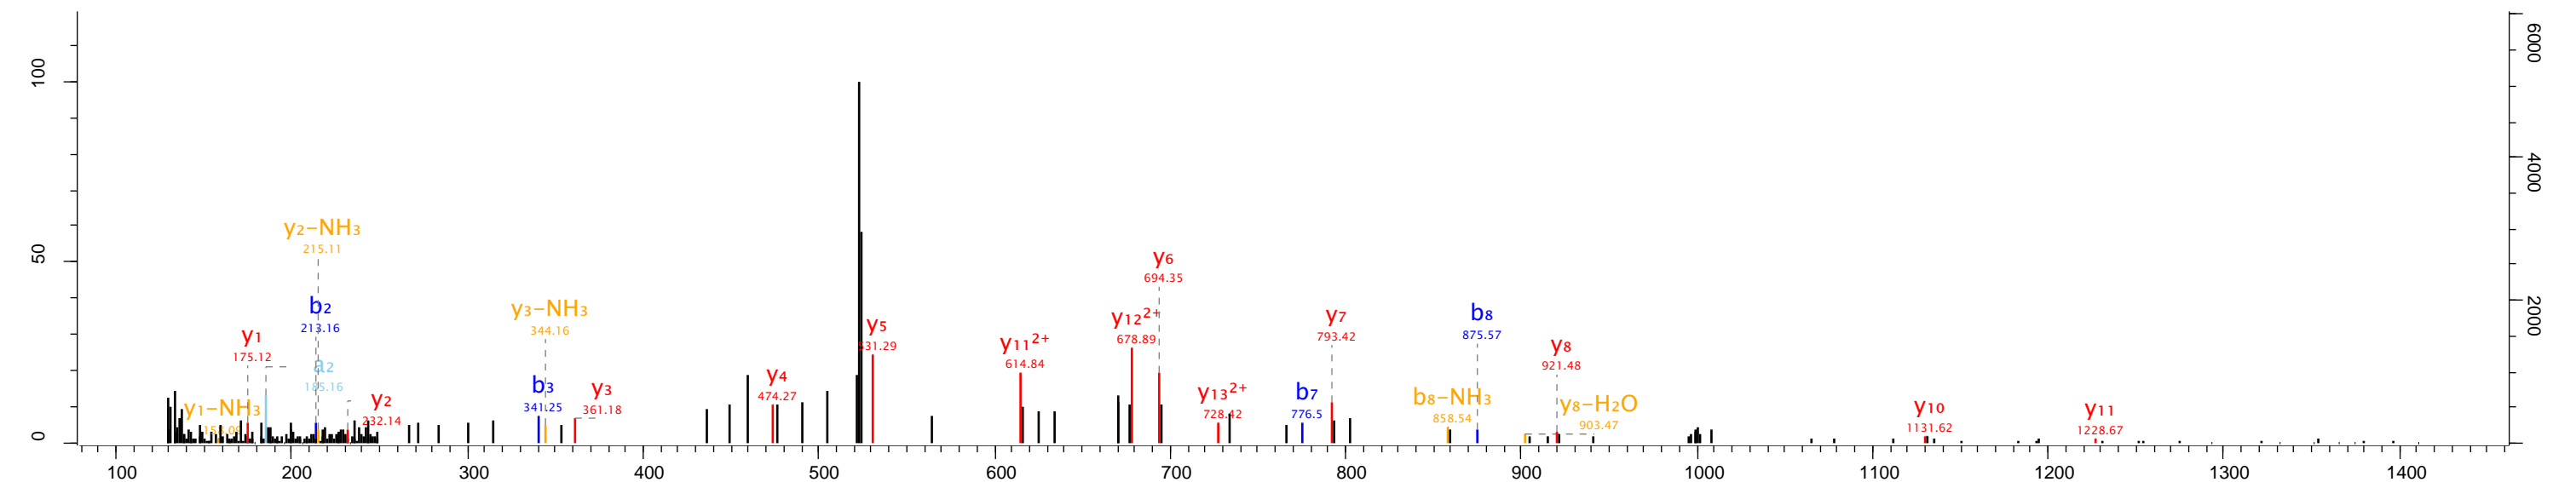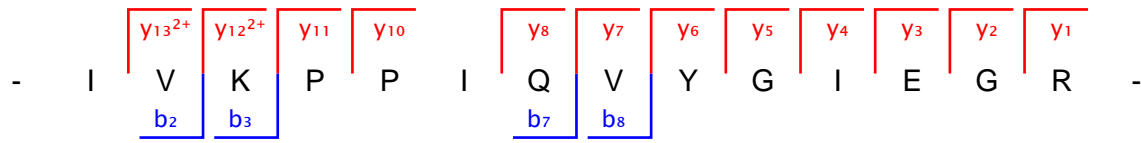

Spectral Annotation for Single-Peptide IDs between Single D11 Cells using Q-OT-LIT

Raw file: 2015-01-08\_CL04\_Blastomere-15  
 Scan: 33470 Method: ITMS; HCD Score: 95.2 m/z: 775.9

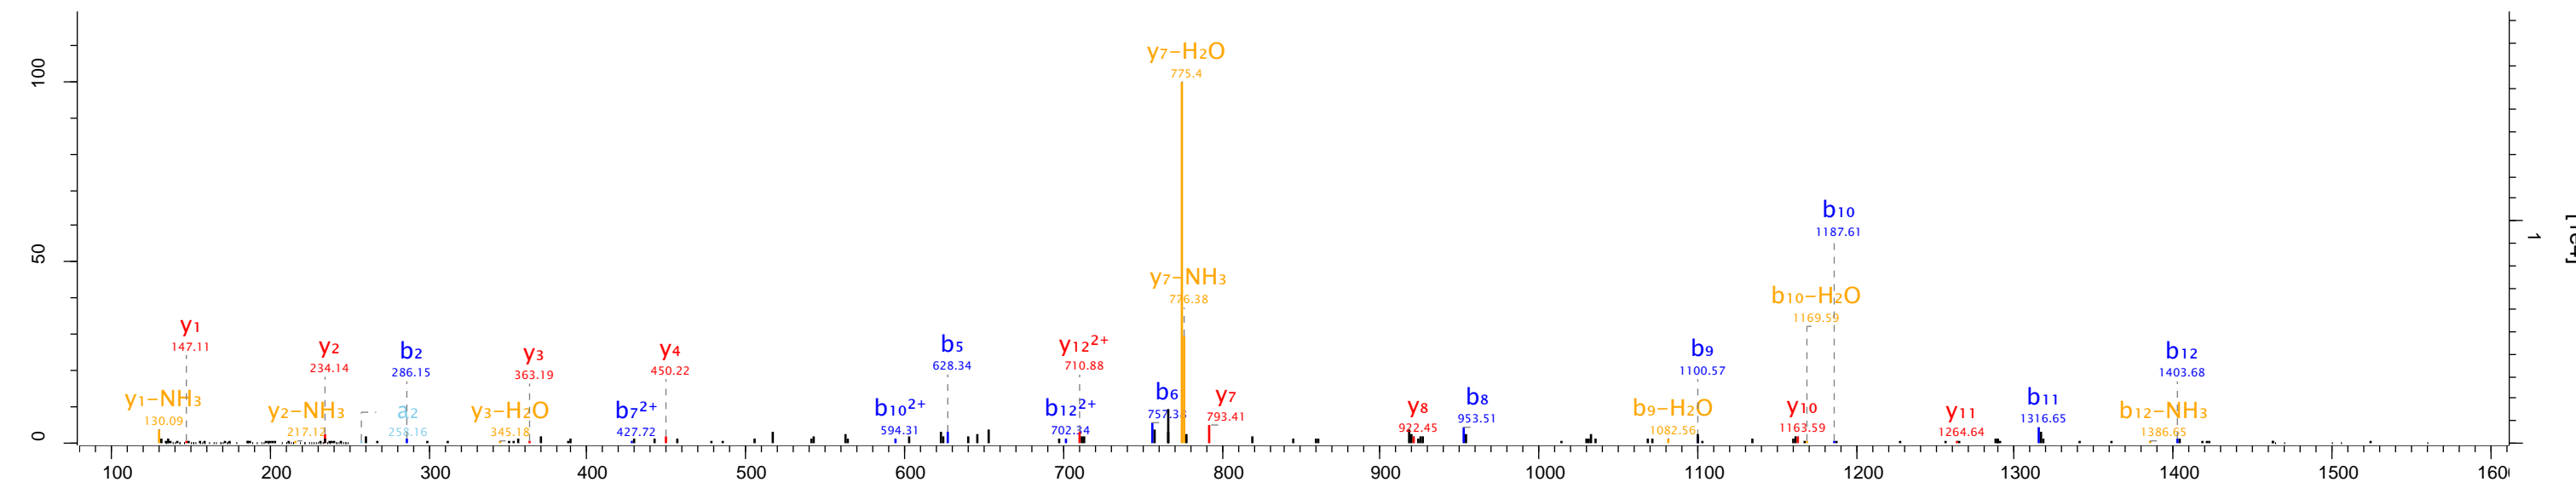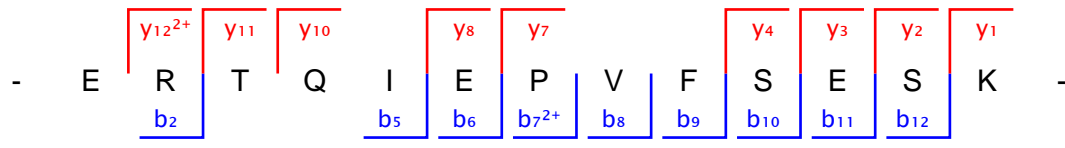

Spectral Annotation for Single-Peptide IDs between Single D11 Cells using Q-OT-LIT

Raw file 2015-01-08\_CL04\_Blastomere-15 Scan 33485 Method ITMS; HCD Score 40.07 m/z 425.24

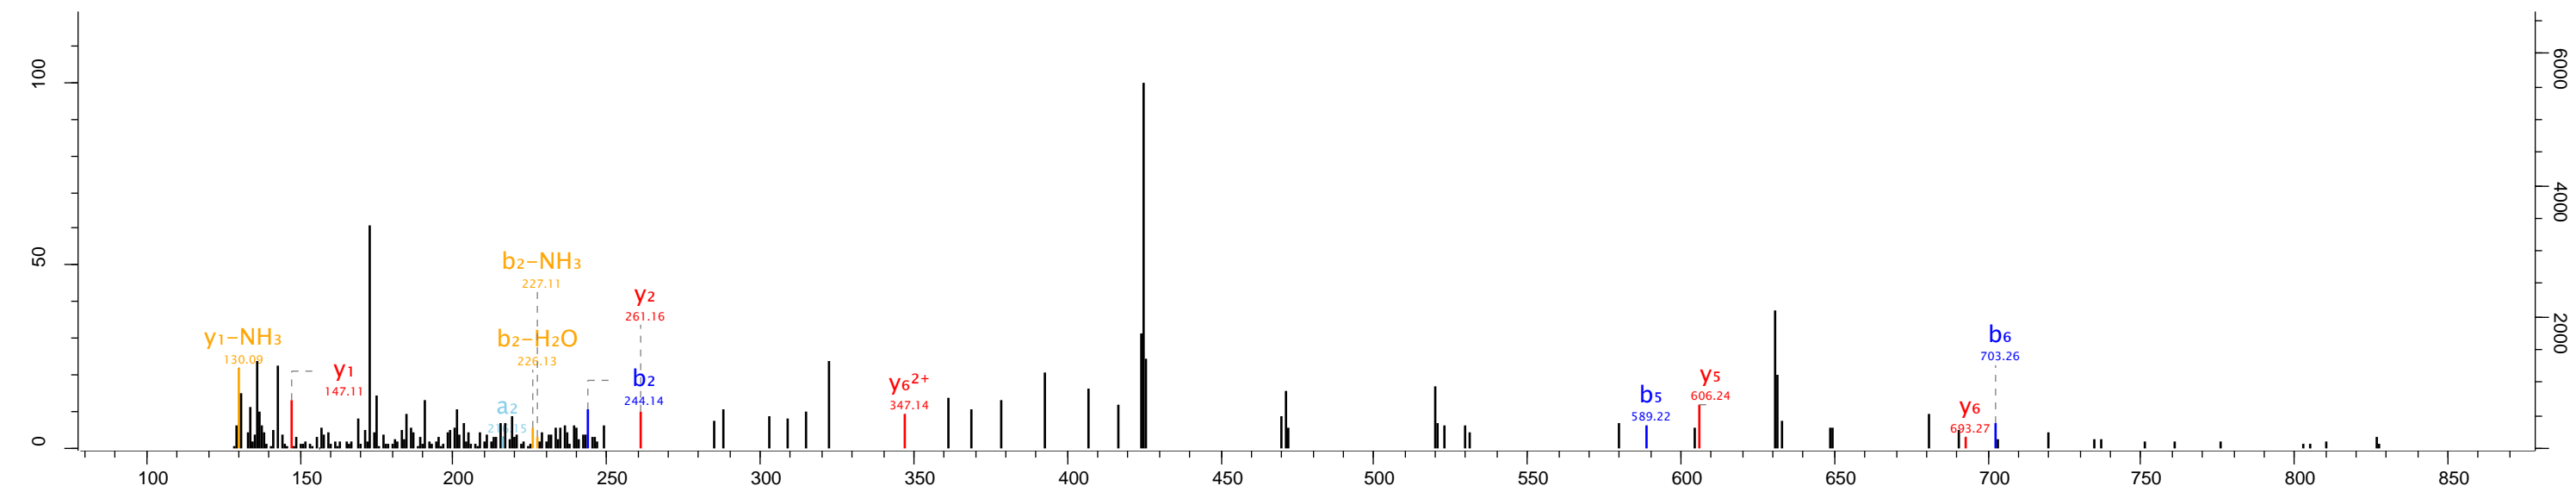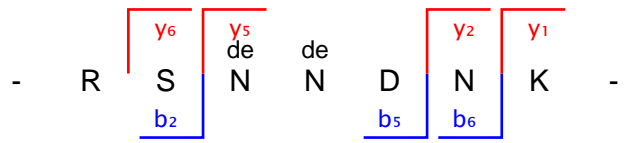

Spectral Annotation for Single-Peptide IDs between Single D11 Cells using Q-OT-LIT

Raw file 2015-01-08\_CL04\_Blastomere-15 Scan 33501 Method ITMS; HCD Score 107.11 m/z 517.26

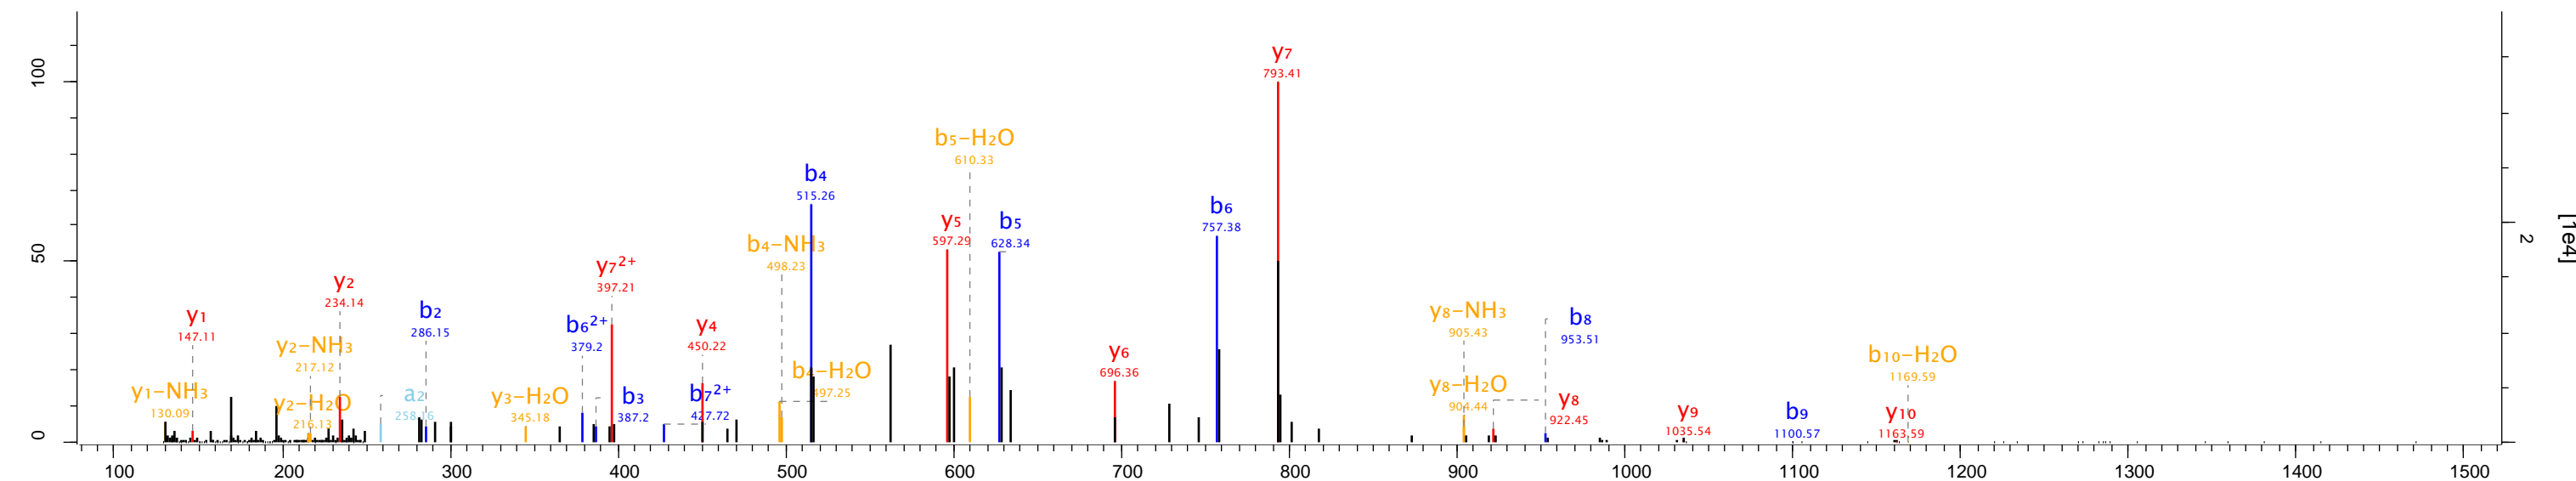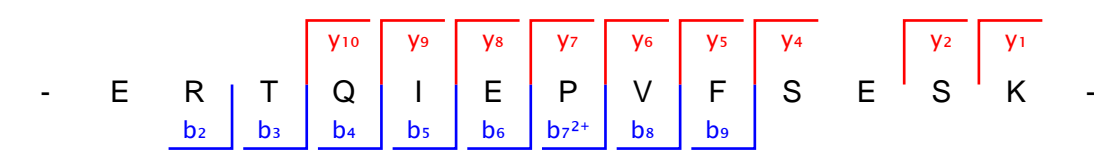

Spectral Annotation for Single-Peptide IDs between Single D11 Cells using Q-OT-LIT



Raw file 2015-01-08\_CL04\_Blastomere-15 Scan 33687 Method ITMS; HCD Score 84.44 m/z 634.57

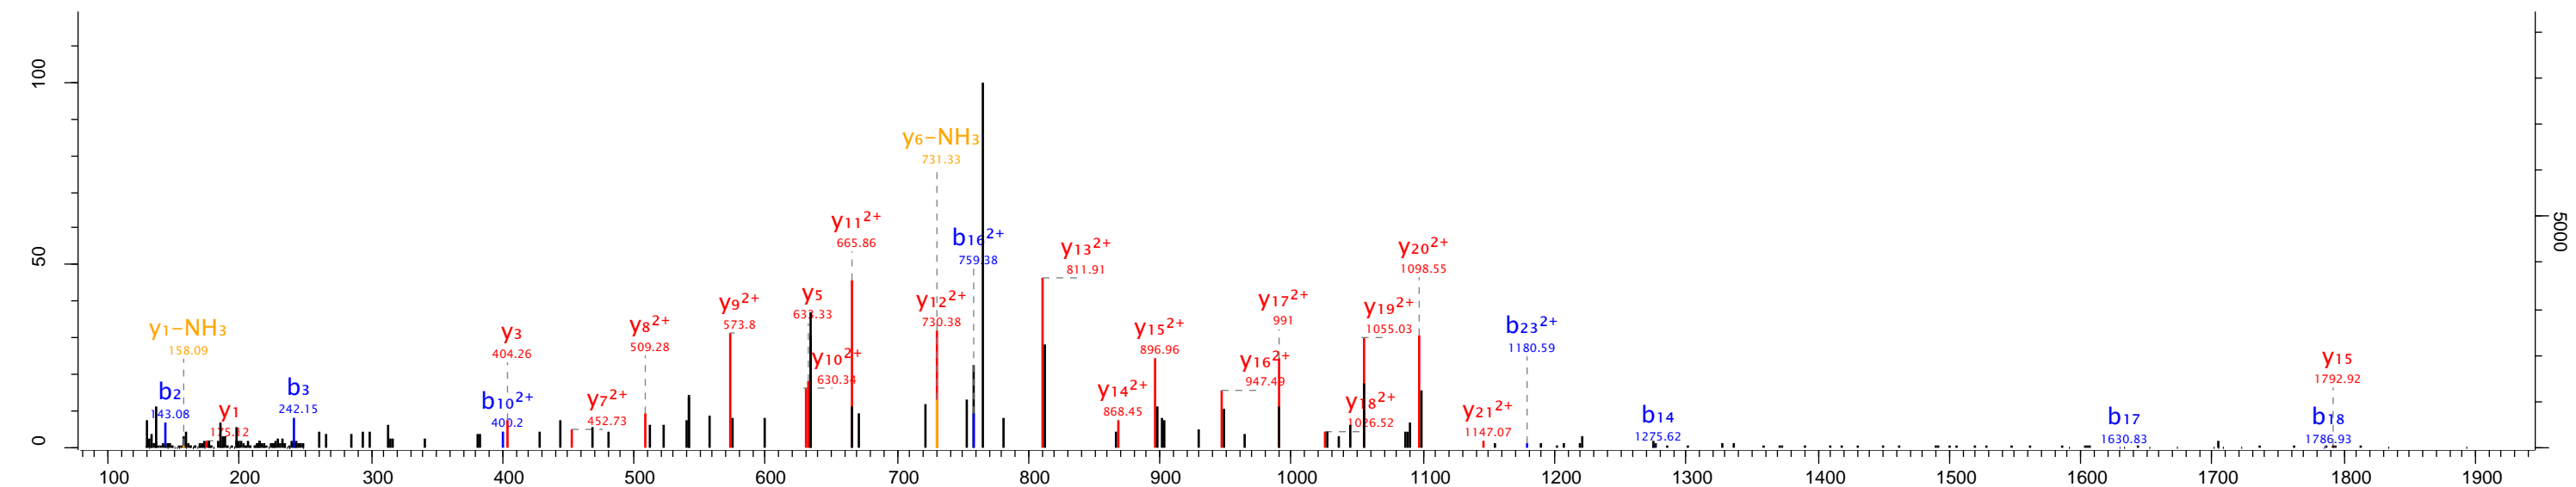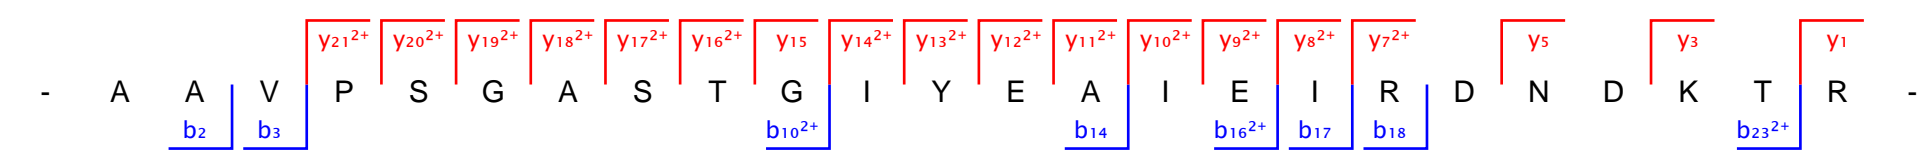

Spectral Annotation for Single-Peptide IDs between Single D11 Cells using Q-OT-LIT

Raw file 2015-01-08\_CL04\_Blastomere-15 Scan 33697 Method ITMS; HCD Score 50.11 m/z 523.64

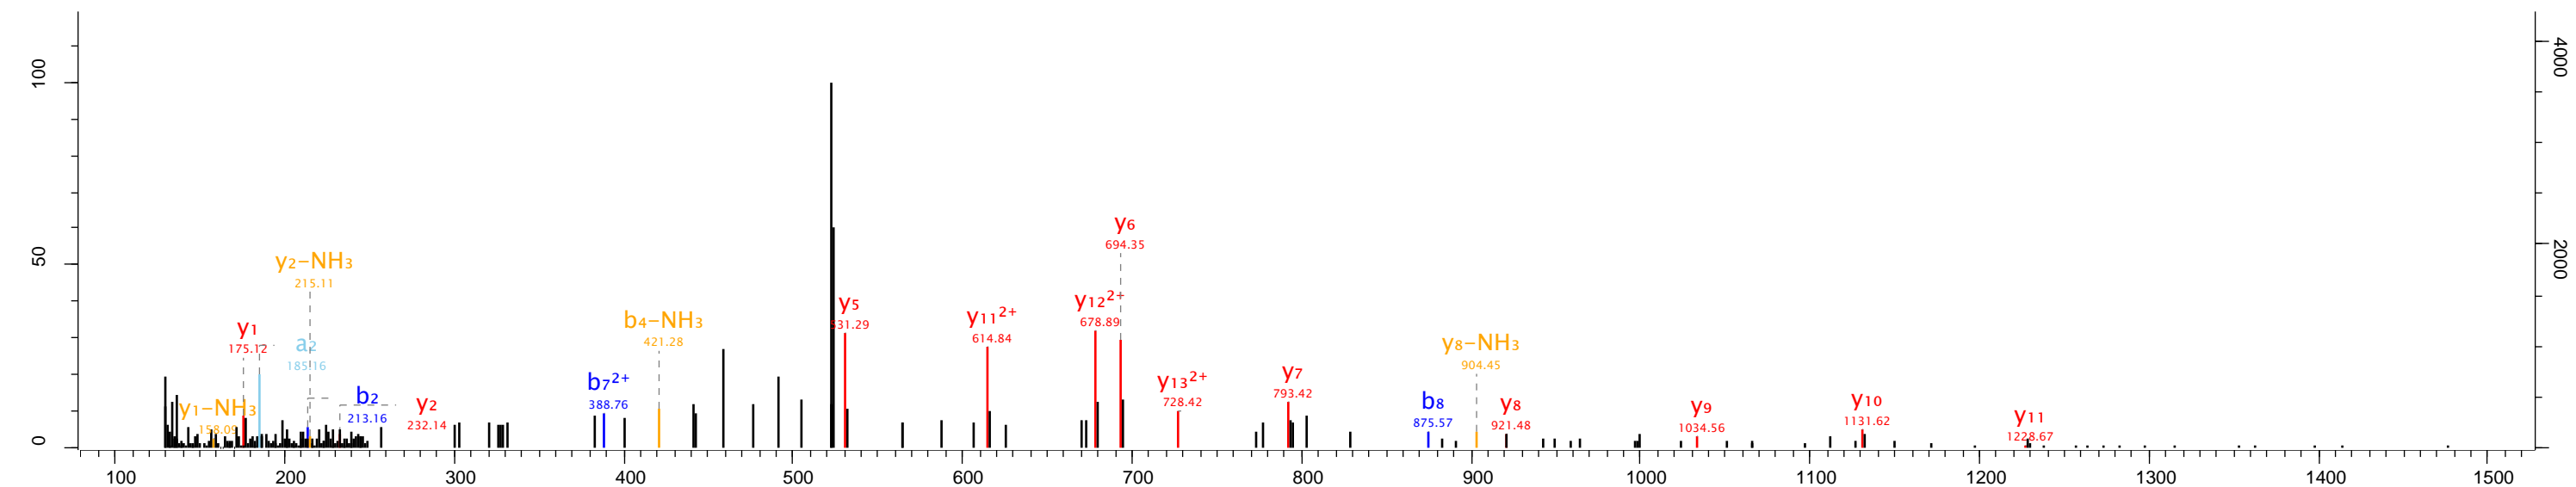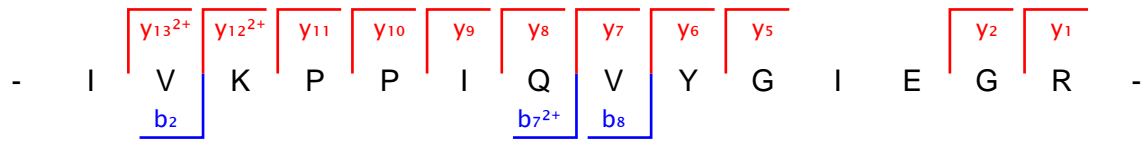

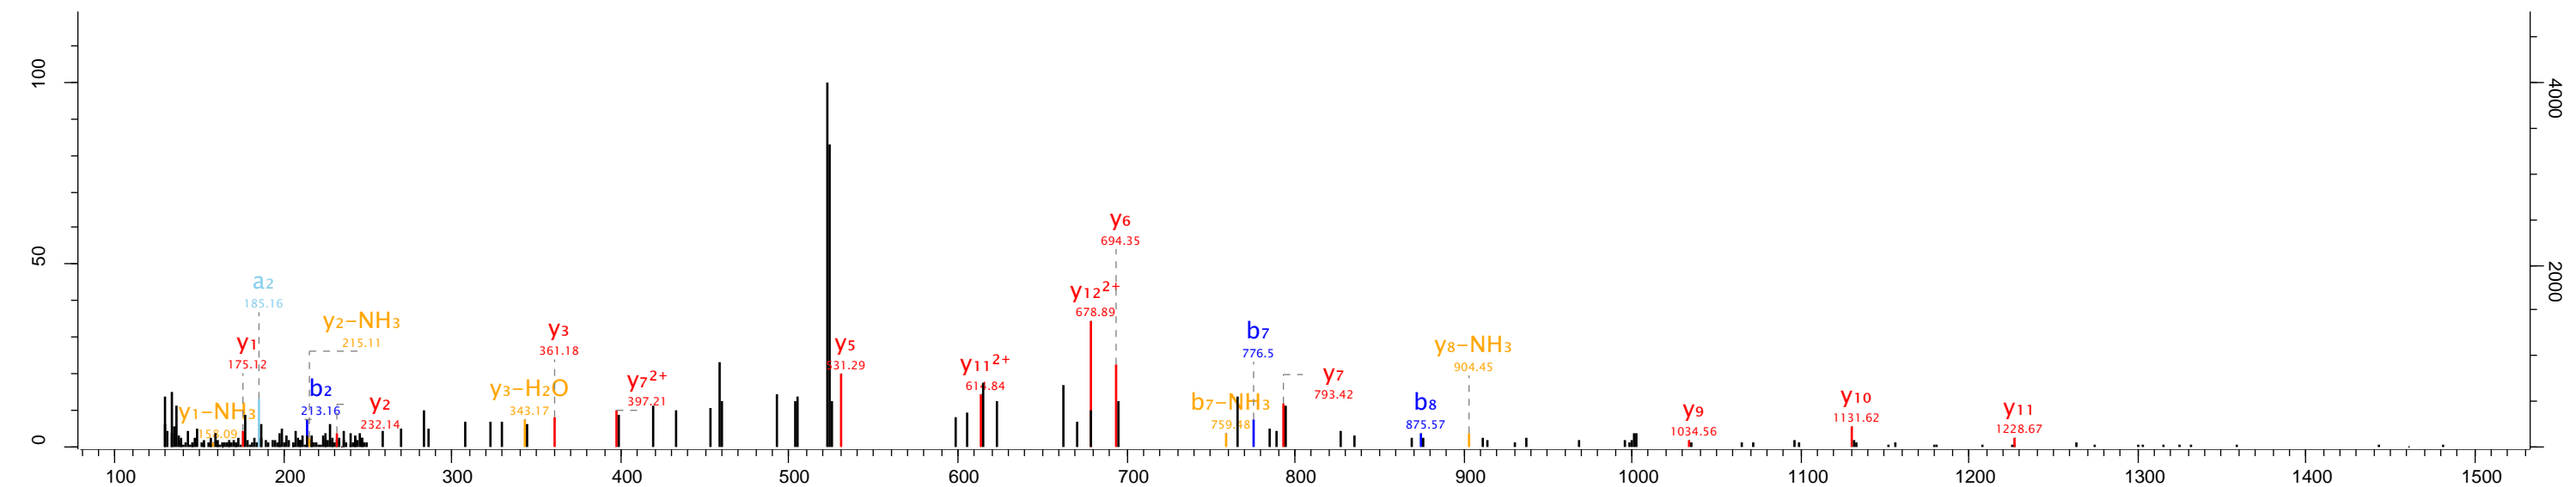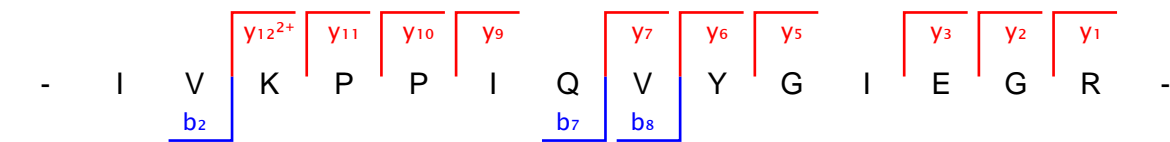

Raw file 2015-01-08\_CL04\_Blastomere-15 Scan 33792 Method ITMS; HCD Score 72.52 m/z 515.25

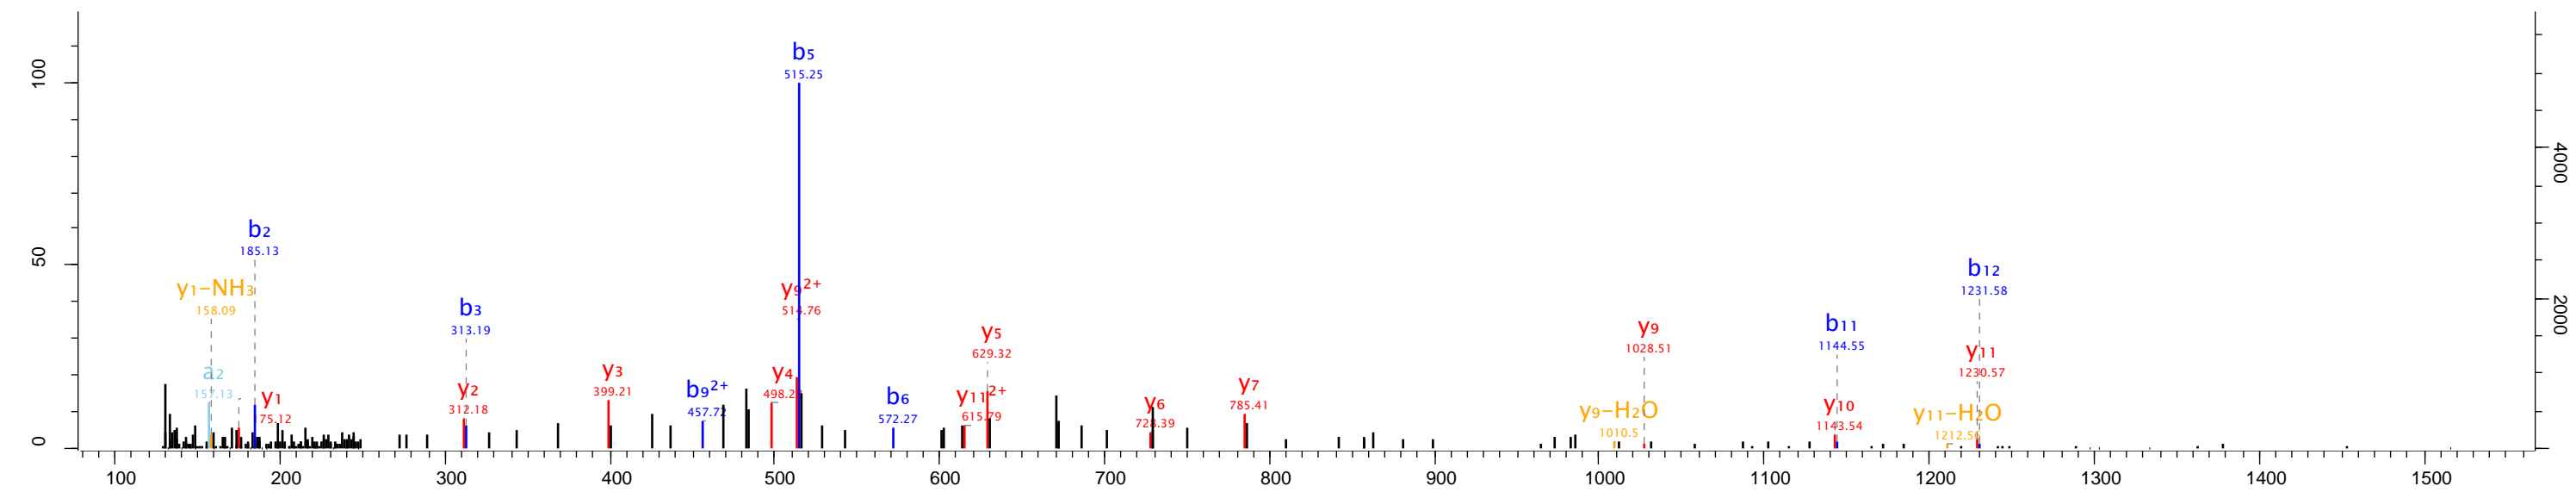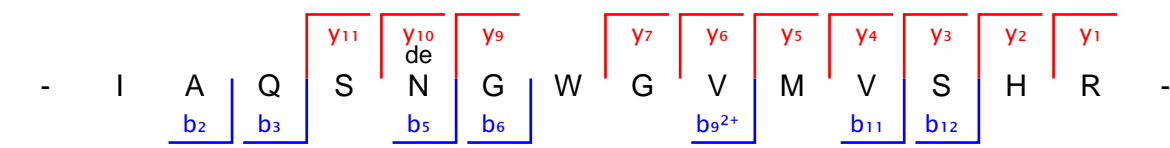

Spectral Annotation for Single-Peptide IDs between Single D11 Cells using Q-OT-LIT

Raw file 2015-01-08\_CL04\_Blastomere-15 Scan 33812 Method ITMS; HCD Score 63.29 m/z 514.92

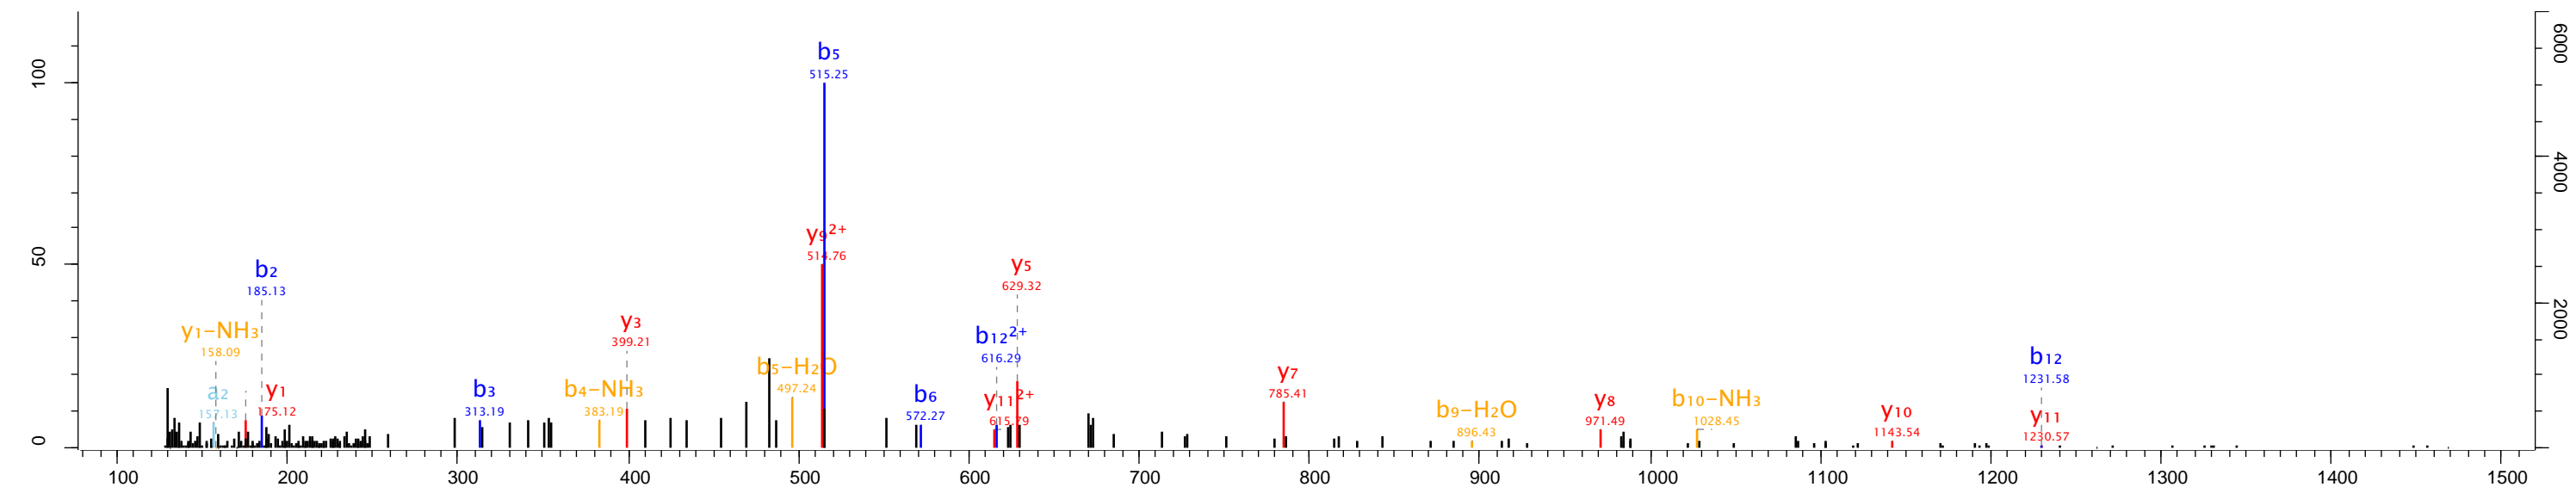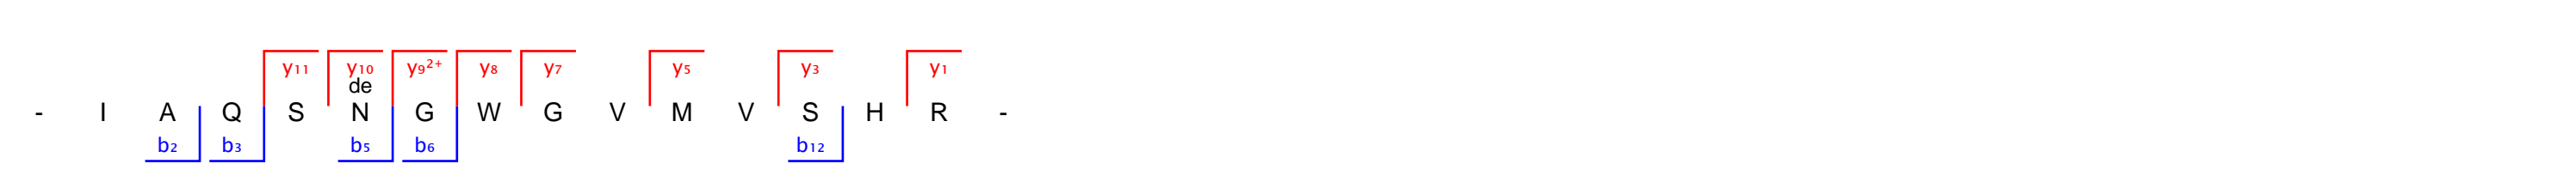

Spectral Annotation for Single-Peptide IDs between Single D11 Cells using Q-OT-LIT

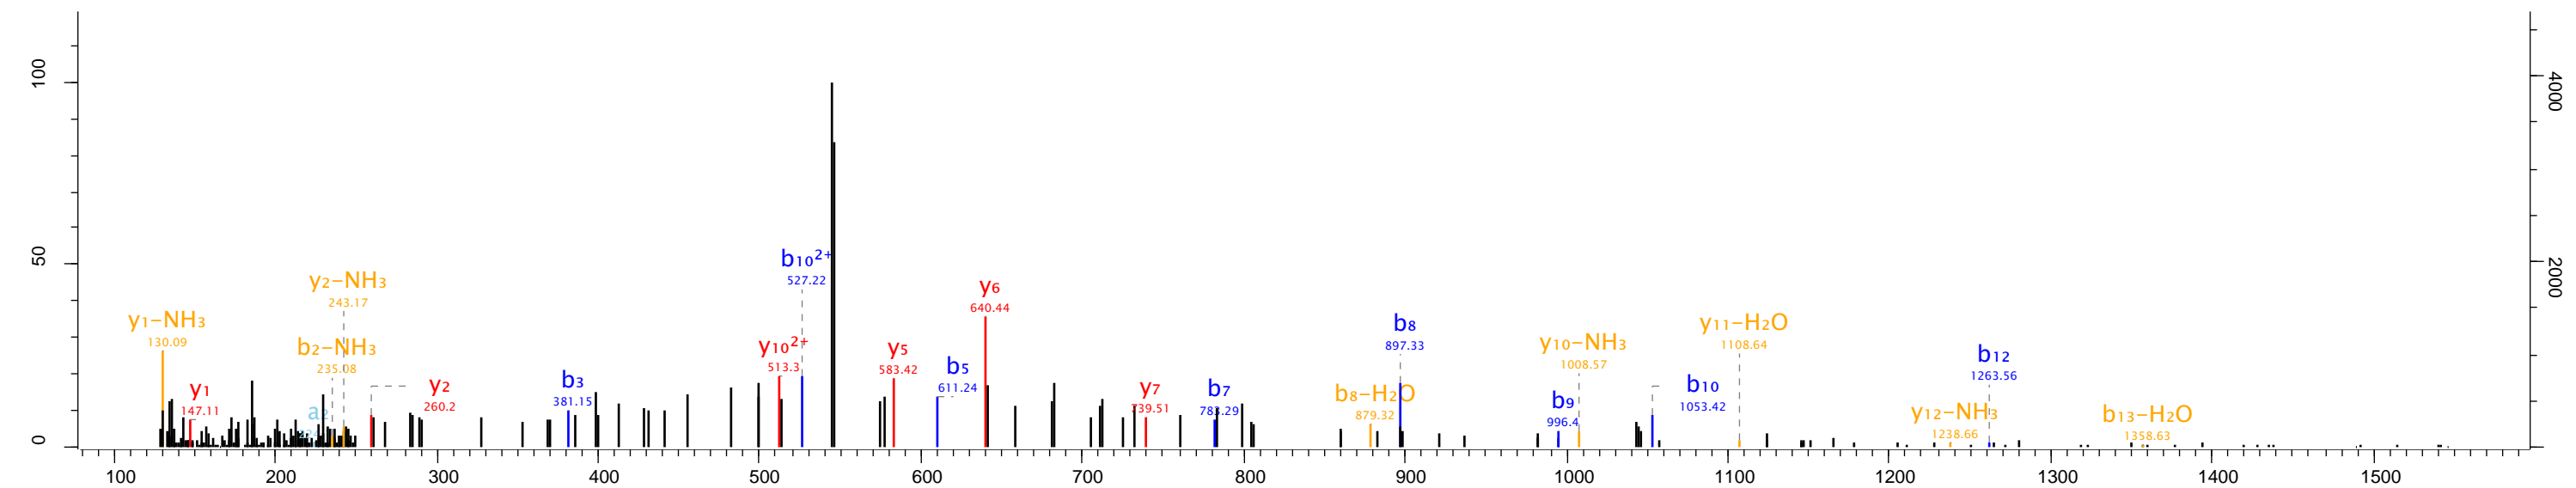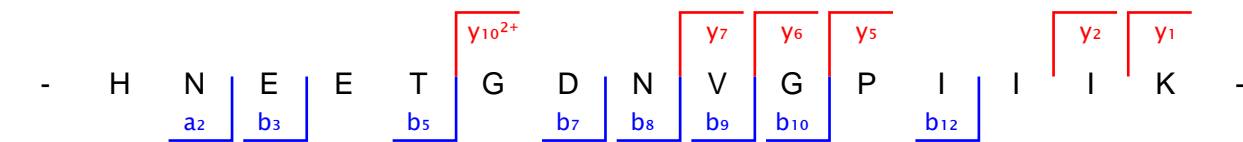

Raw file 2015-01-08\_CL04\_Blastomere-15 Scan 33834 Method ITMS; HCD Score 32.23 m/z 634.82

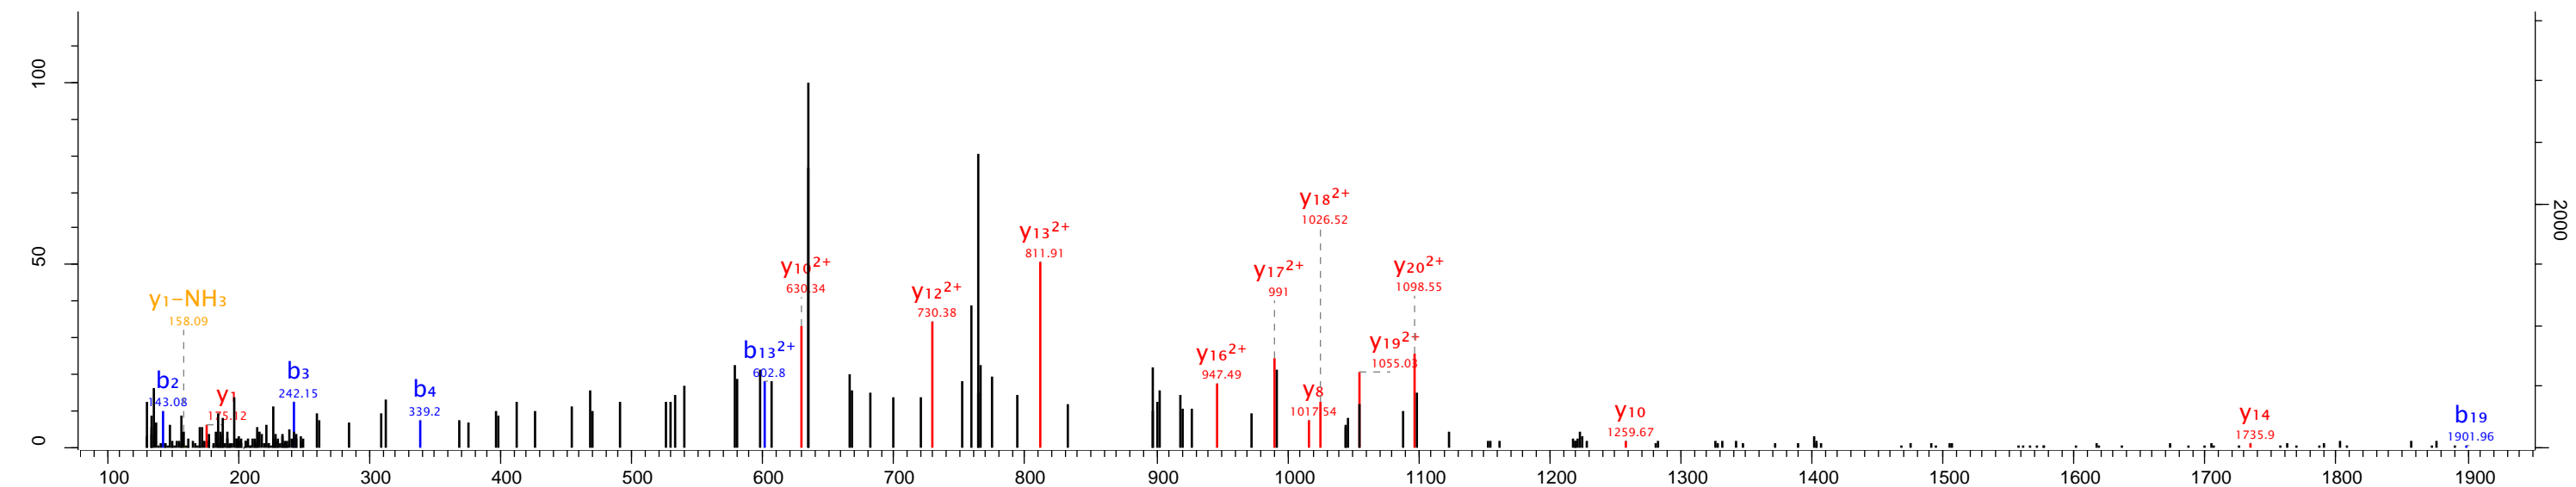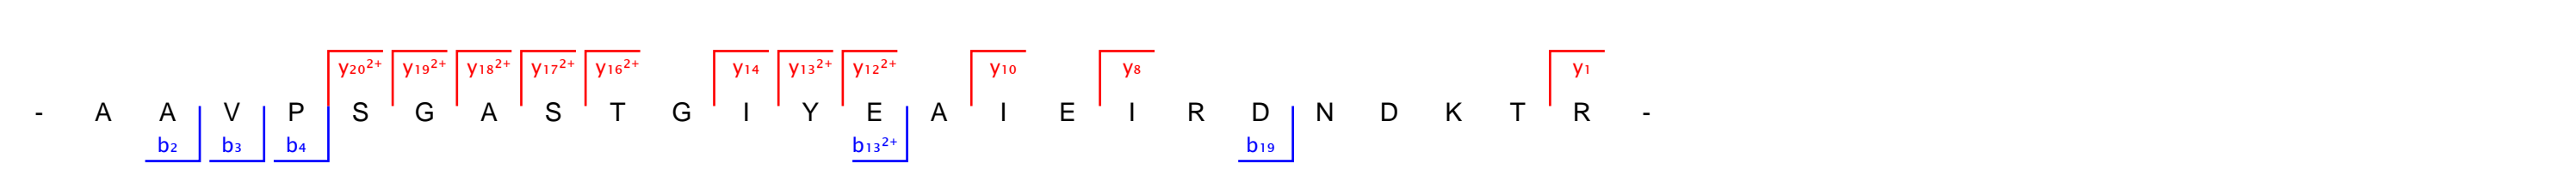

Raw file 2015-01-08\_CL04\_Blastomere-15 Scan 33886 Method ITMS; HCD Score 37.77 m/z 545.95

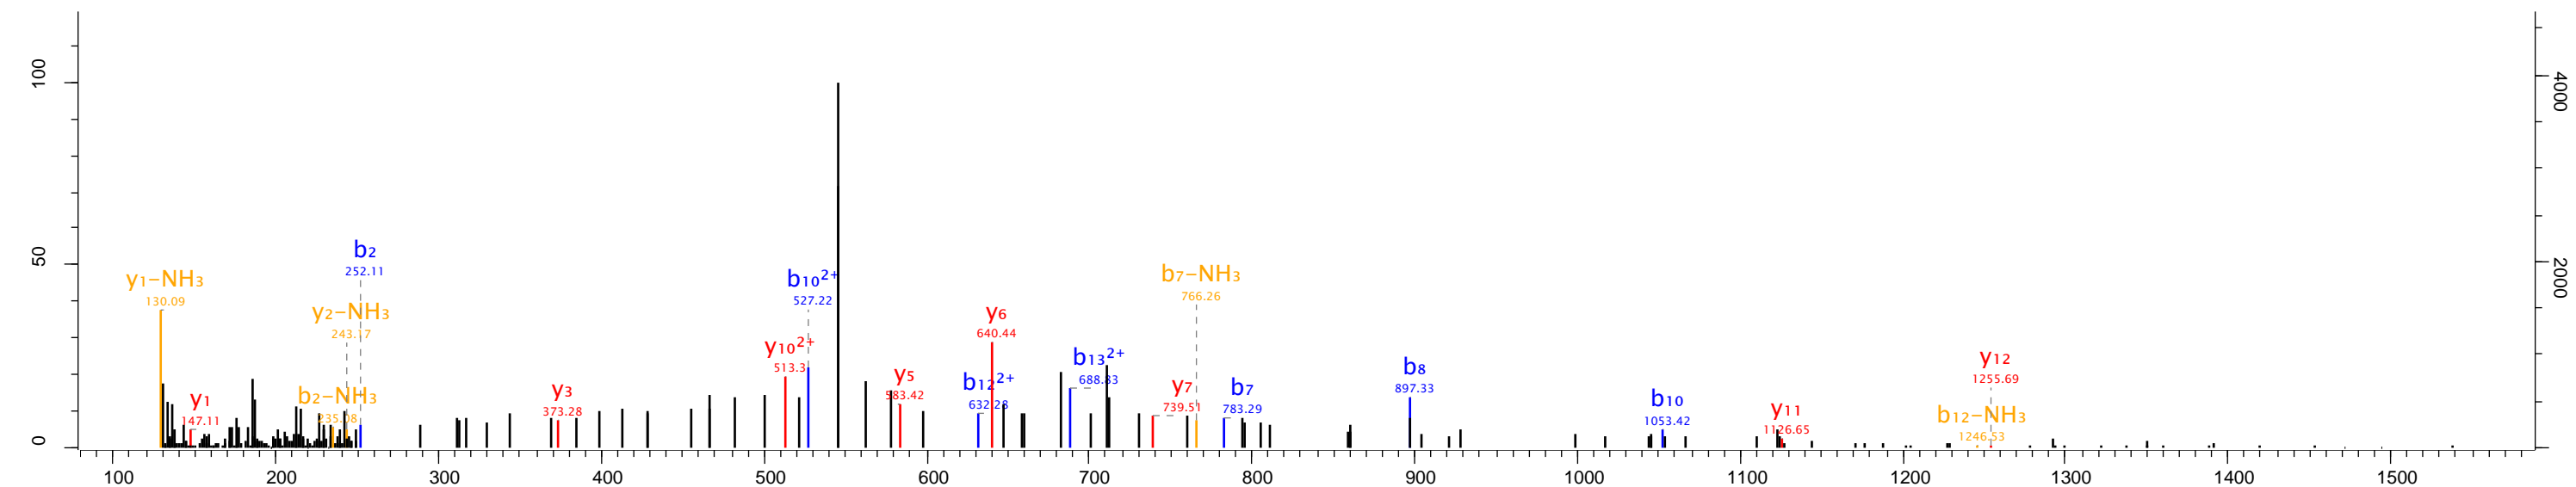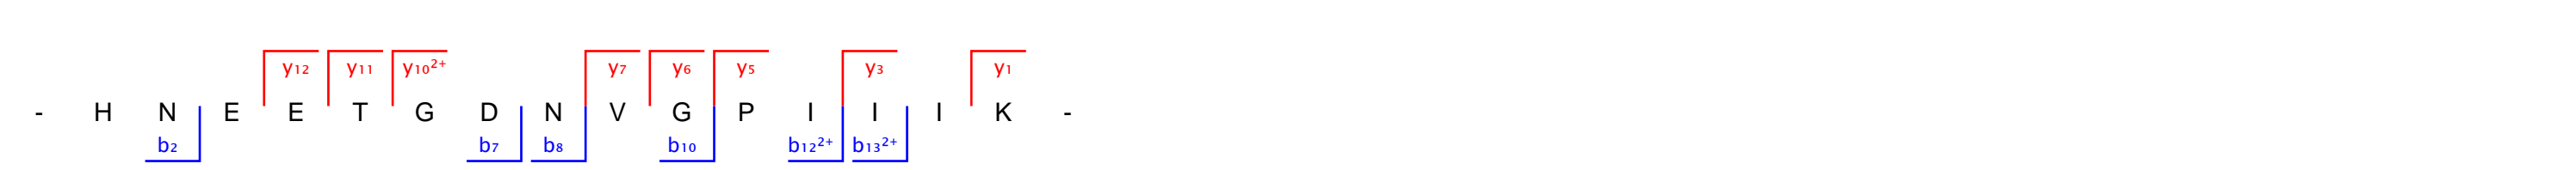

Spectral Annotation for Single-Peptide IDs between Single D11 Cells using Q-OT-LIT



Raw file 2015-01-08\_CL04\_Blastomere-15 Scan 33968 Method ITMS; HCD Score 89.35 m/z 421.76

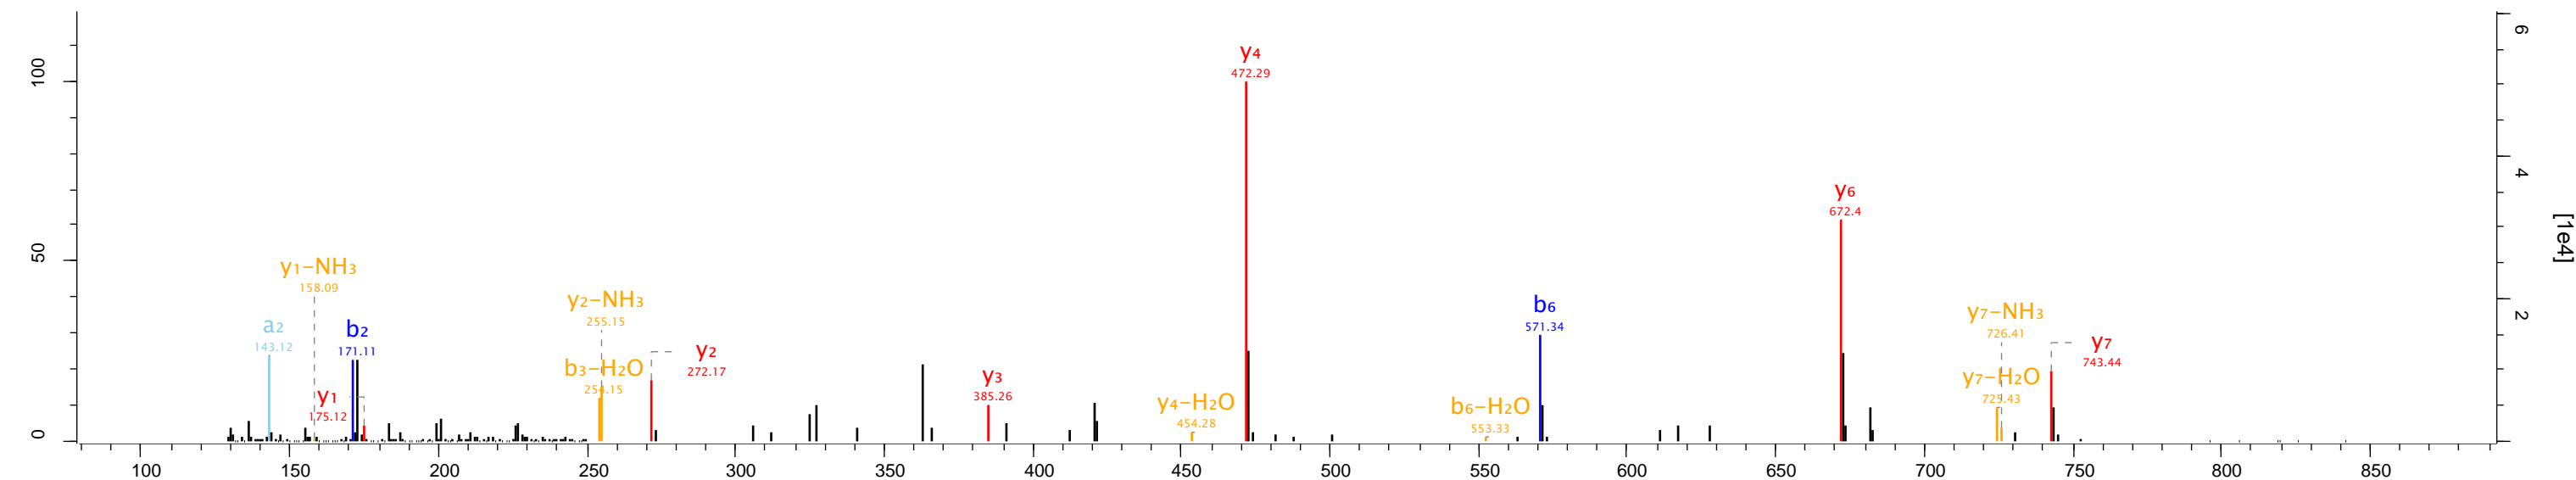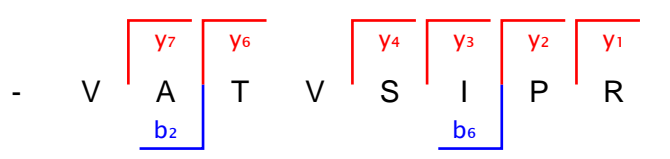

Raw file 2015-01-08\_CL04\_Blastomere-15 Scan 34228 Method ITMS; HCD Score 118.74 m/z 421.76

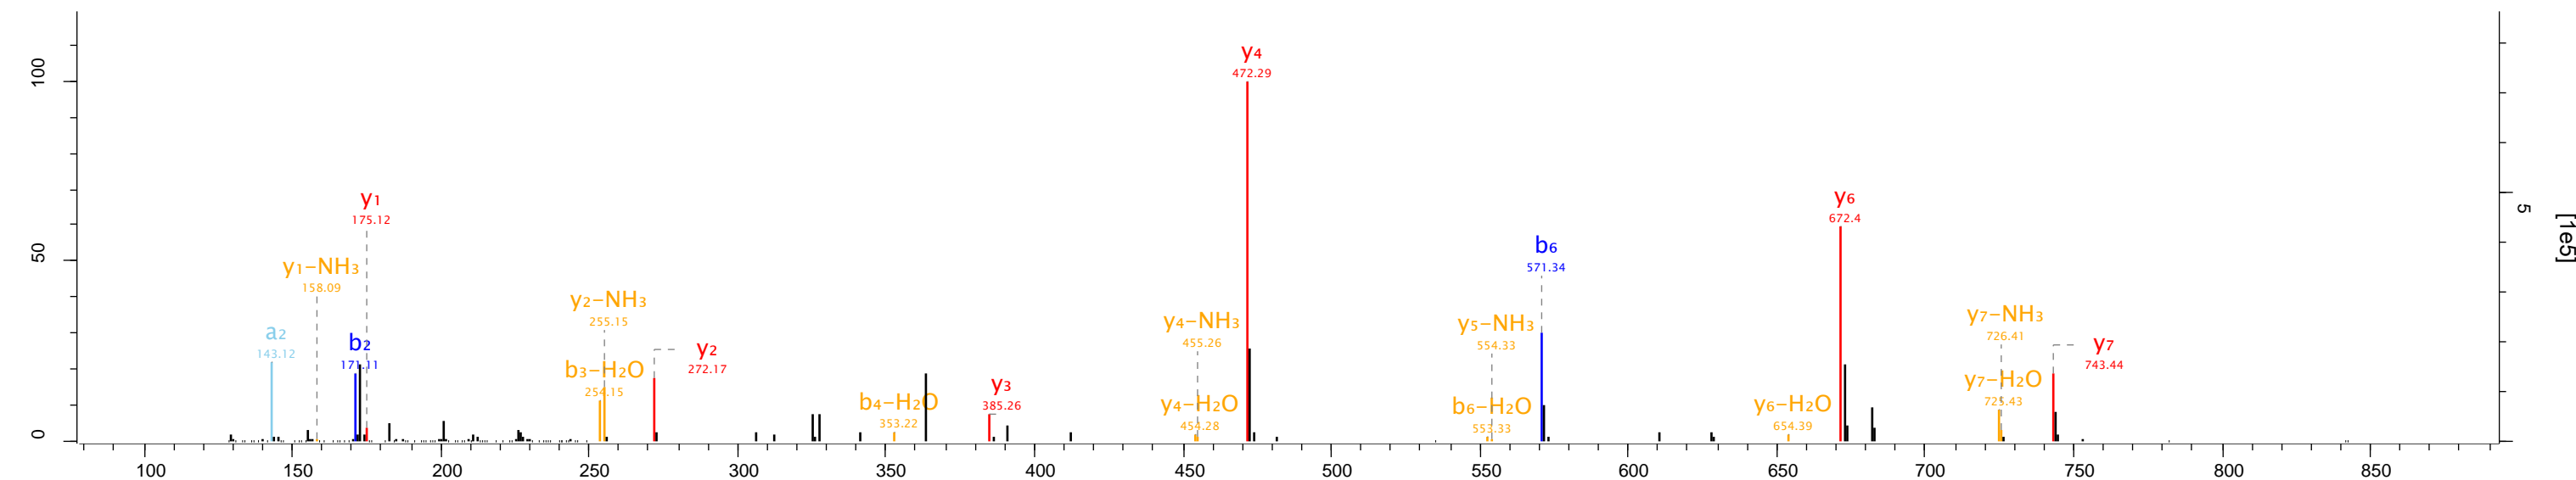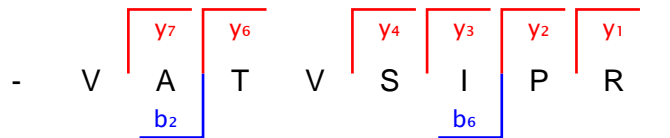

Spectral Annotation for Single-Peptide IDs between Single D11 Cells using Q-OT-LIT

Raw file 2015-01-08\_CL04\_Blastomere-15 Scan 34243 Method ITMS; HCD Score 95.82 m/z 421.76

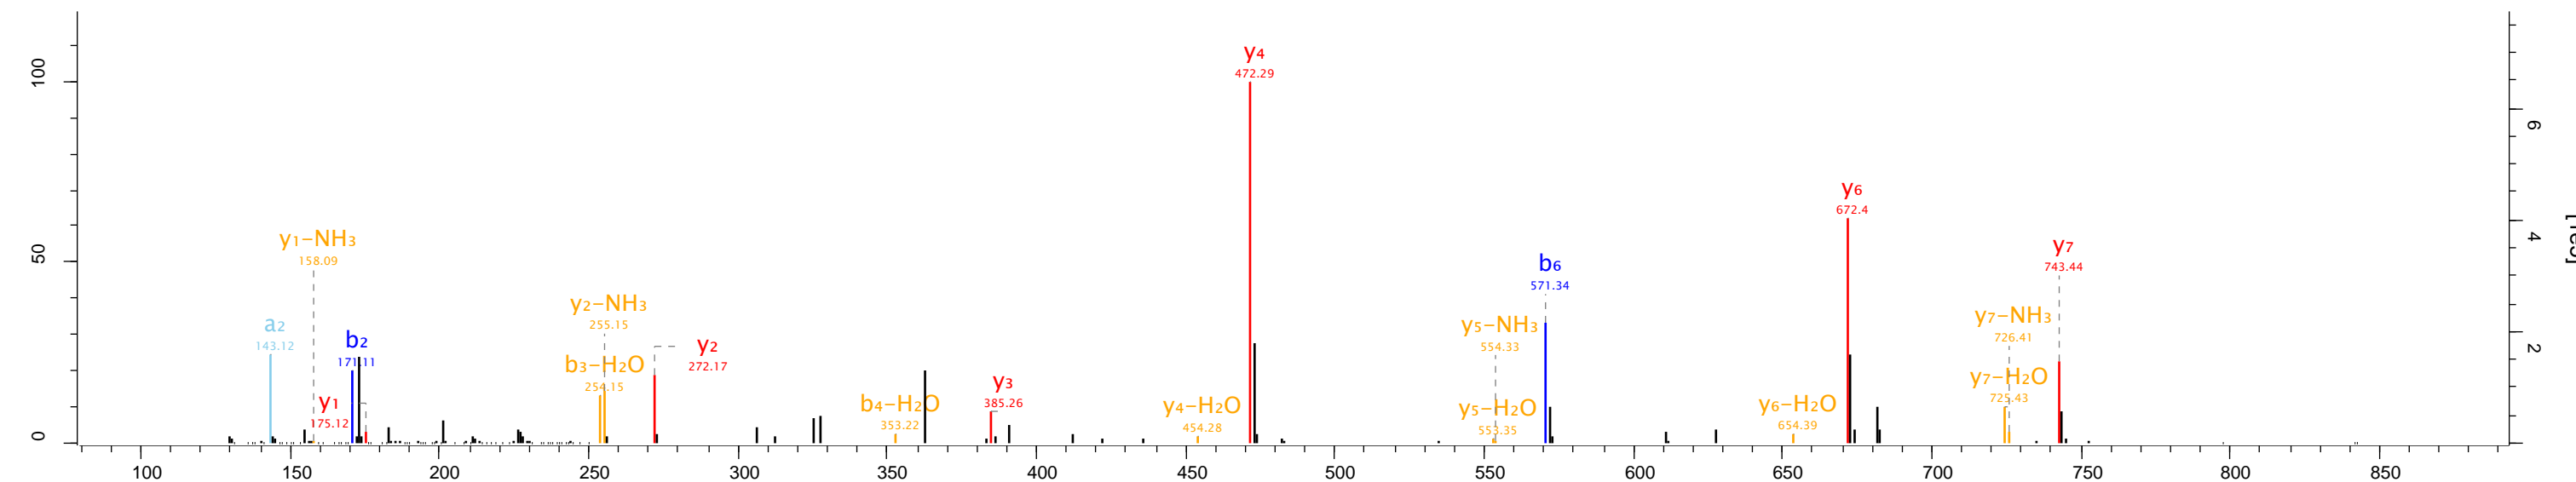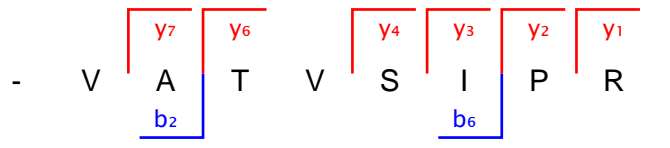

Spectral Annotation for Single-Peptide IDs between Single D11 Cells using Q-OT-LIT

Raw file 2015-01-08\_CL04\_Blastomere-15 Scan 34262 Method ITMS; HCD Score 107.01 m/z 421.76

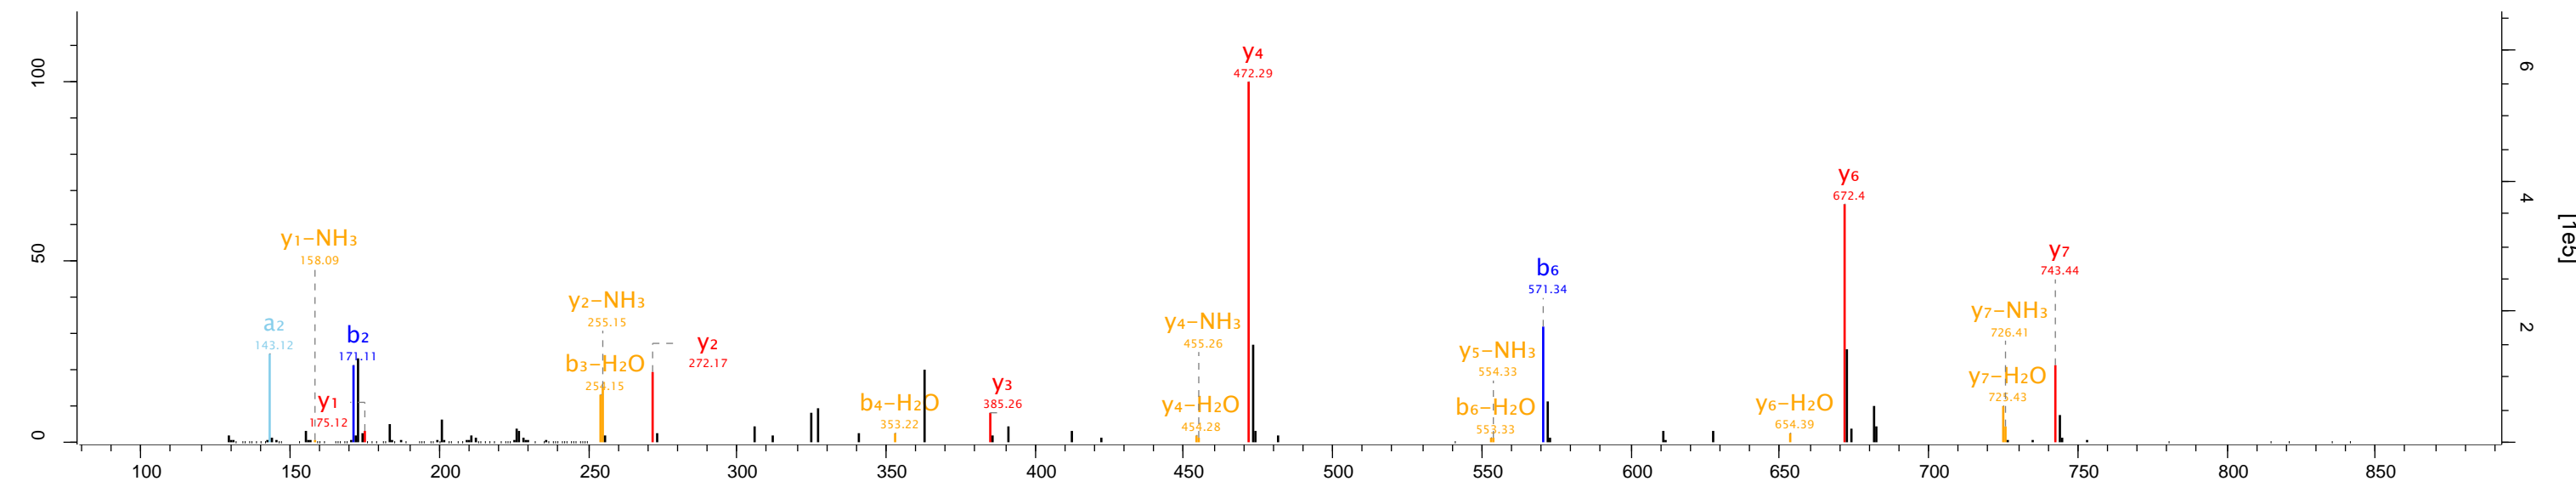

Raw file 2015-01-08\_CL04\_Blastomere-15 Scan 34284 Method ITMS; HCD Score 118.74 m/z 421.76

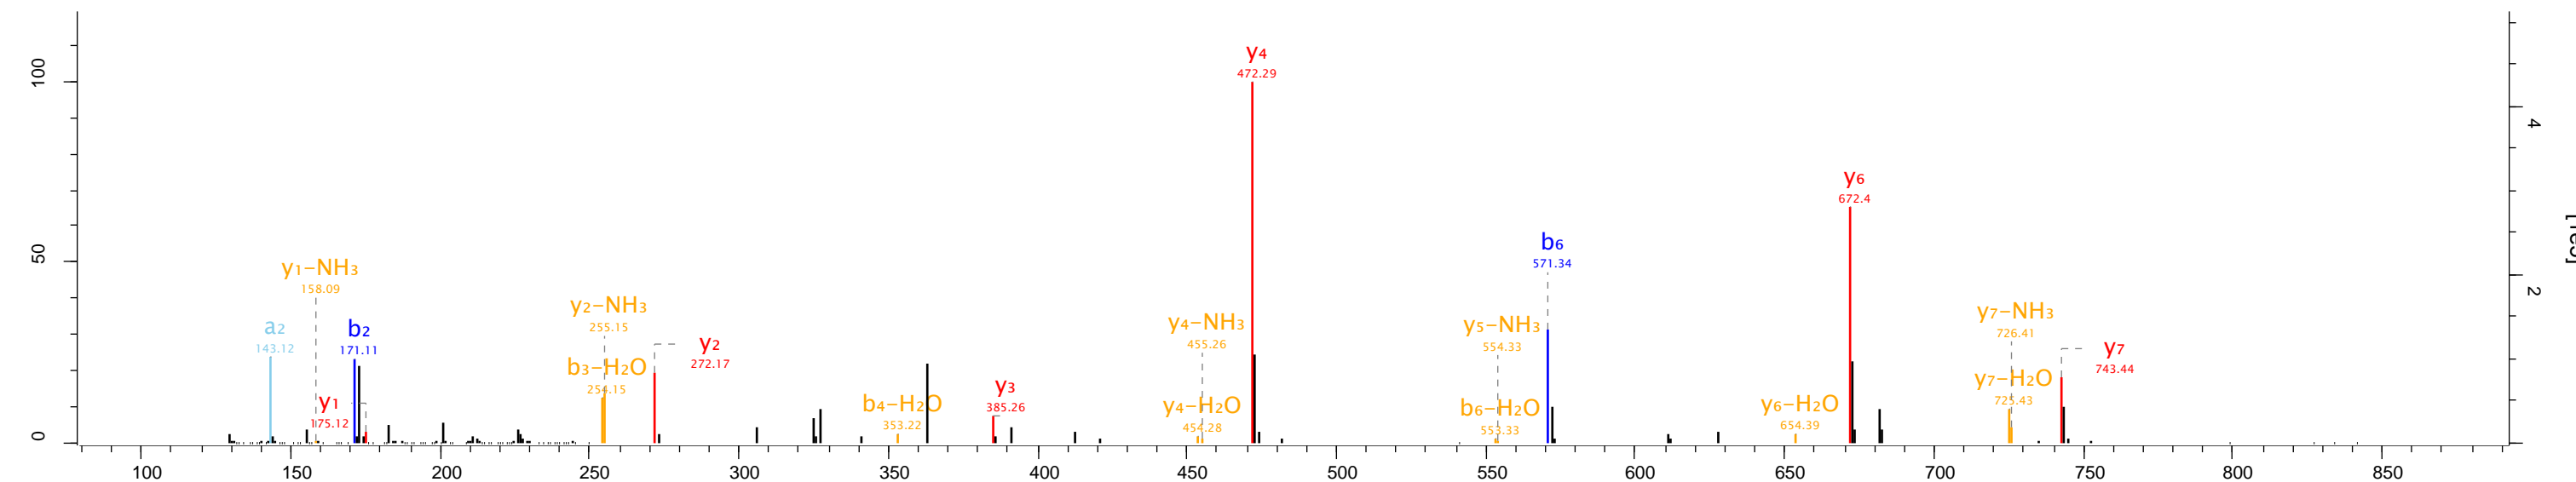

Spectral Annotation for Single-Peptide IDs between Single D11 Cells using Q-OT-LIT

Raw file 2015-01-08\_CL04\_Blastomere-15 Scan 34428 Method ITMS; HCD Score 59.68 m/z 545.95

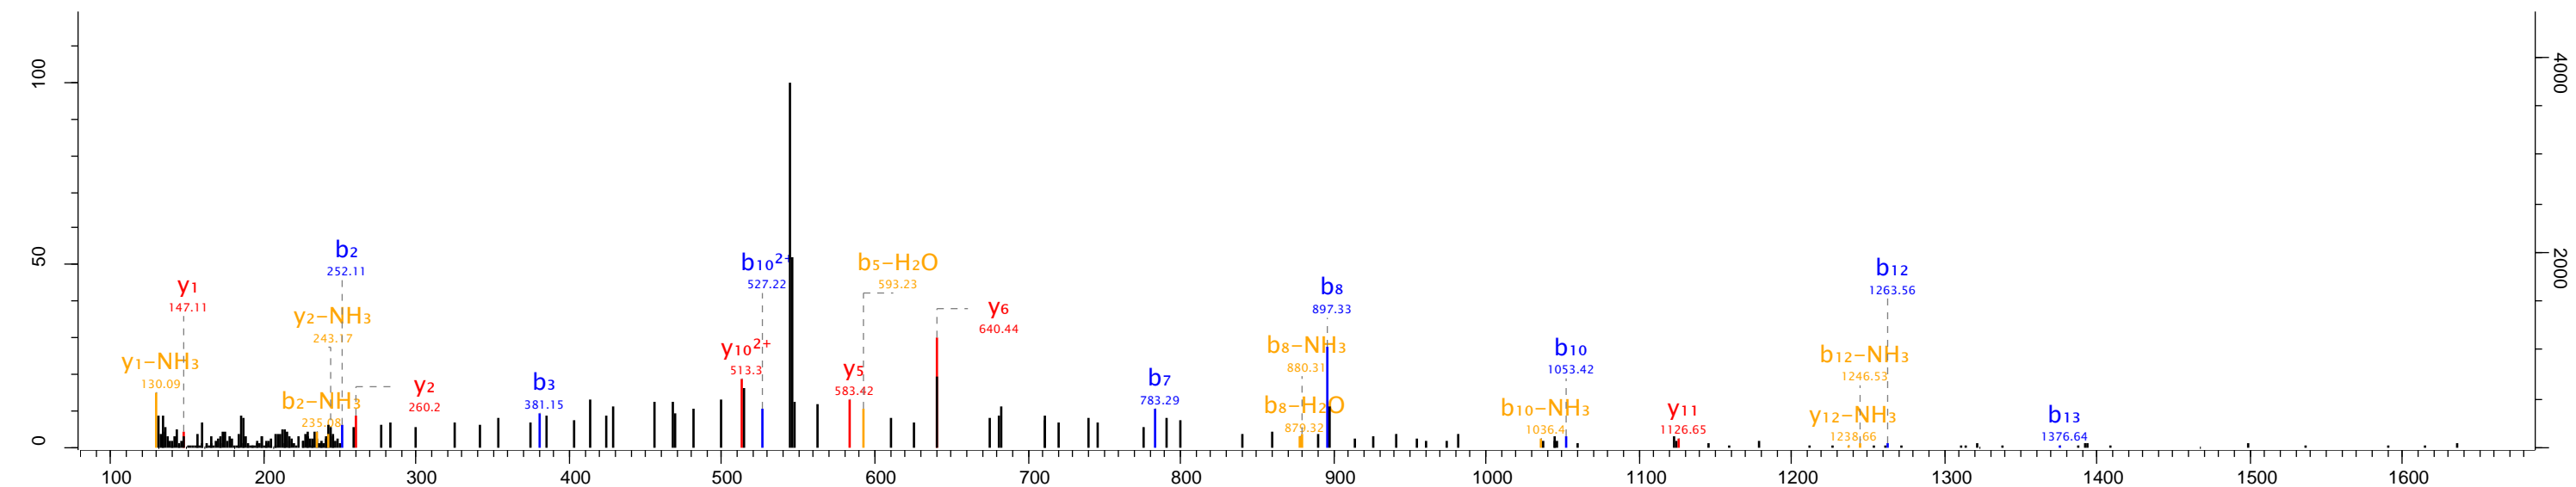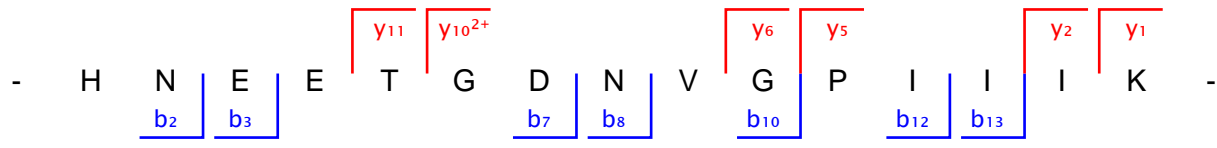

Spectral Annotation for Single-Peptide IDs between Single D11 Cells using Q-OT-LIT

Raw file: 2015-01-08\_CL04\_Blastomere-15  
 Scan: 34574 Method: ITMS; HCD Score: 95.82 m/z: 421.76

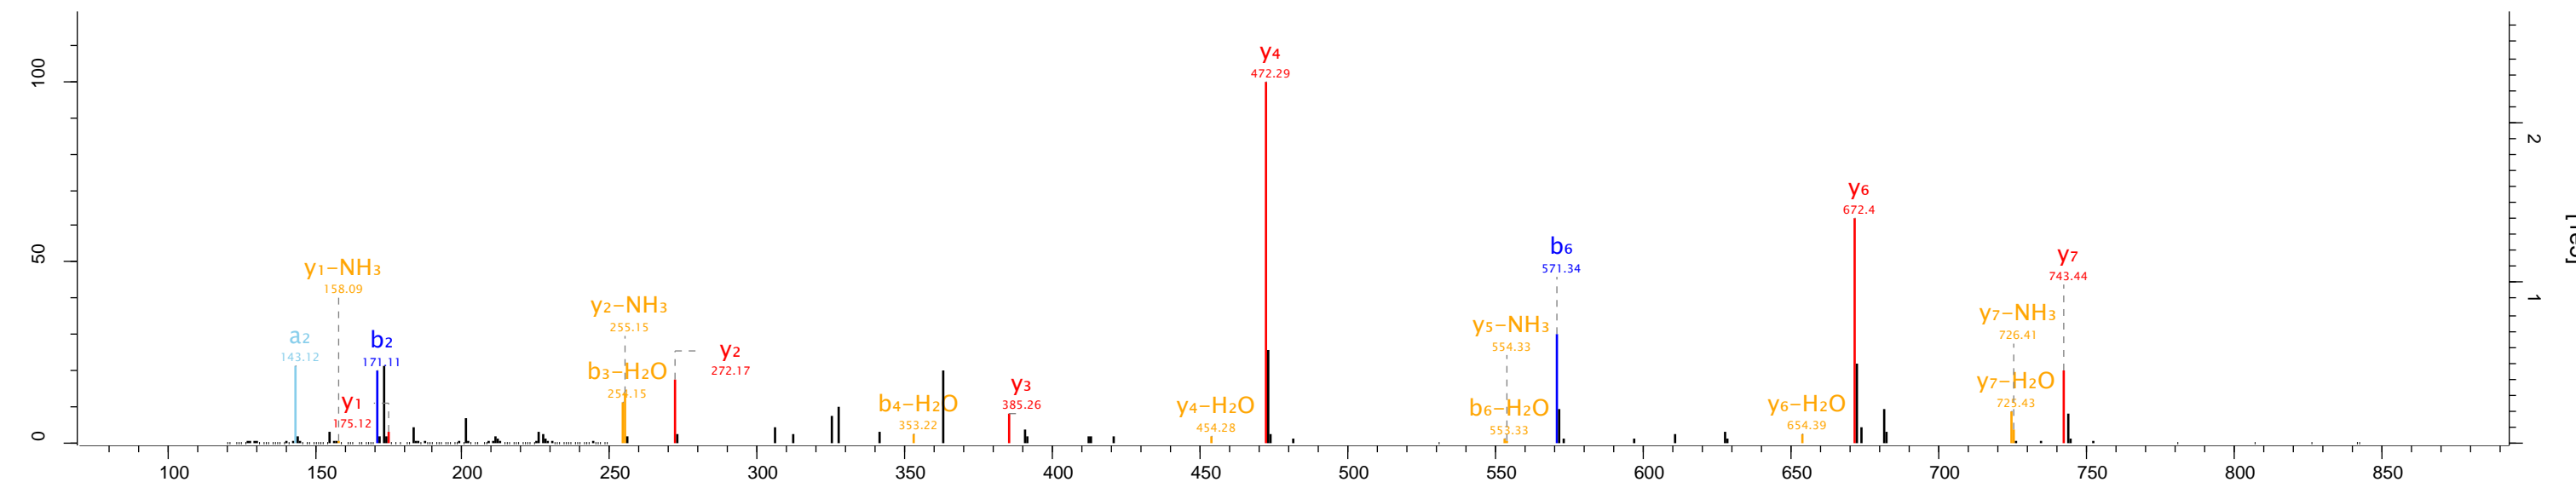

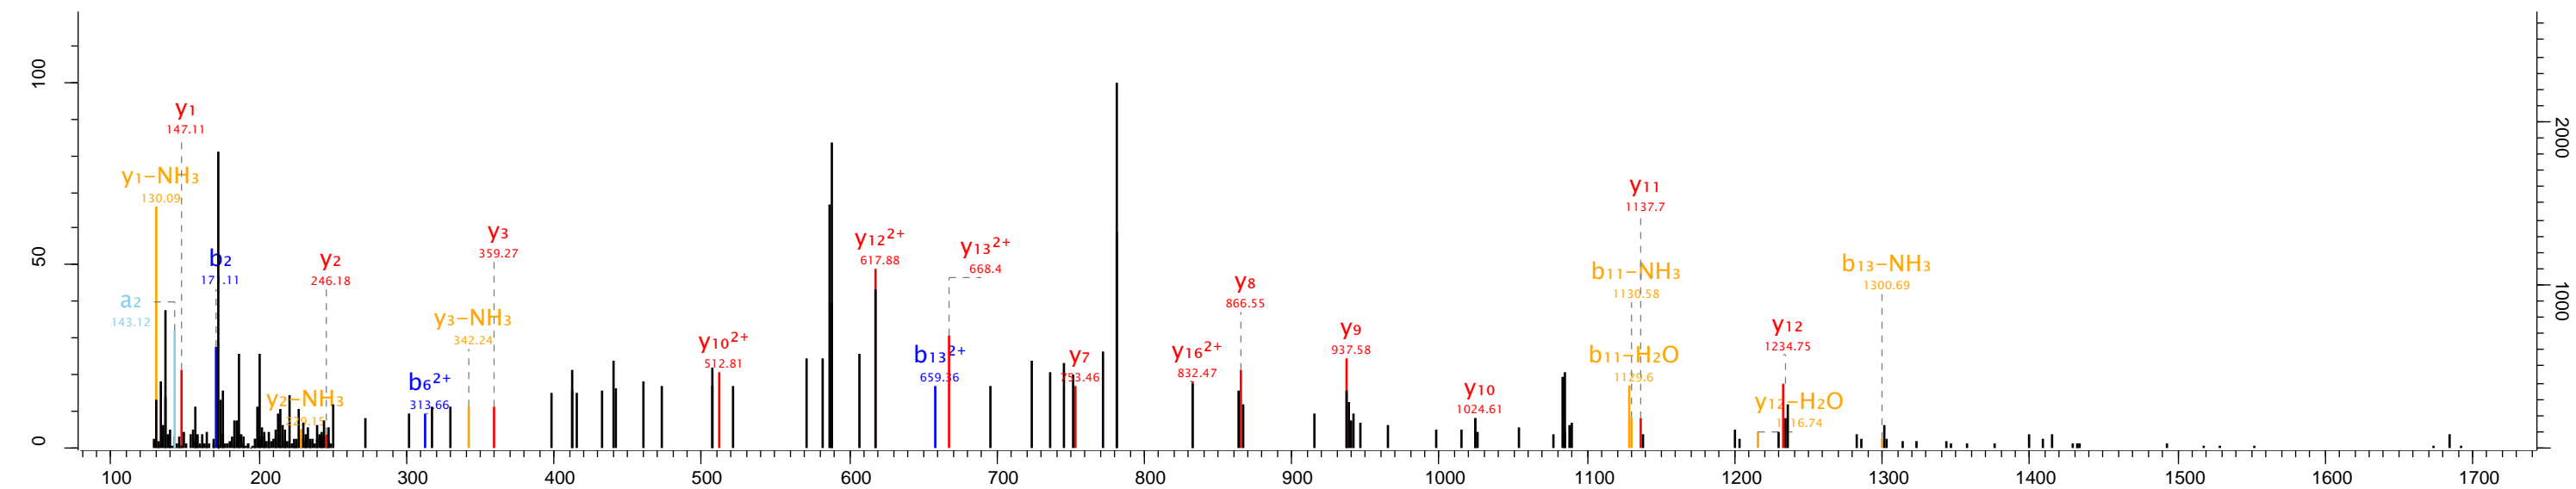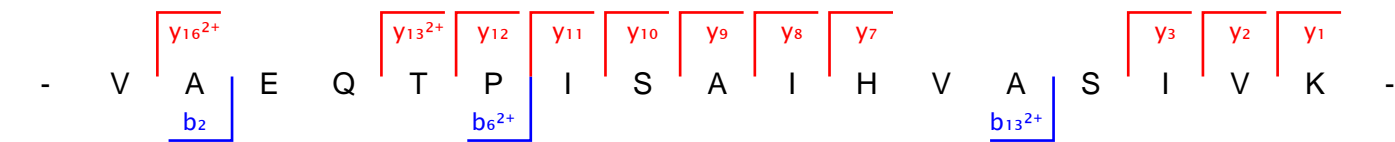



Raw file 2015-01-08\_CL04\_Blastomere-15 Scan 34855 Method ITMS; HCD Score 63.46 m/z 590.66

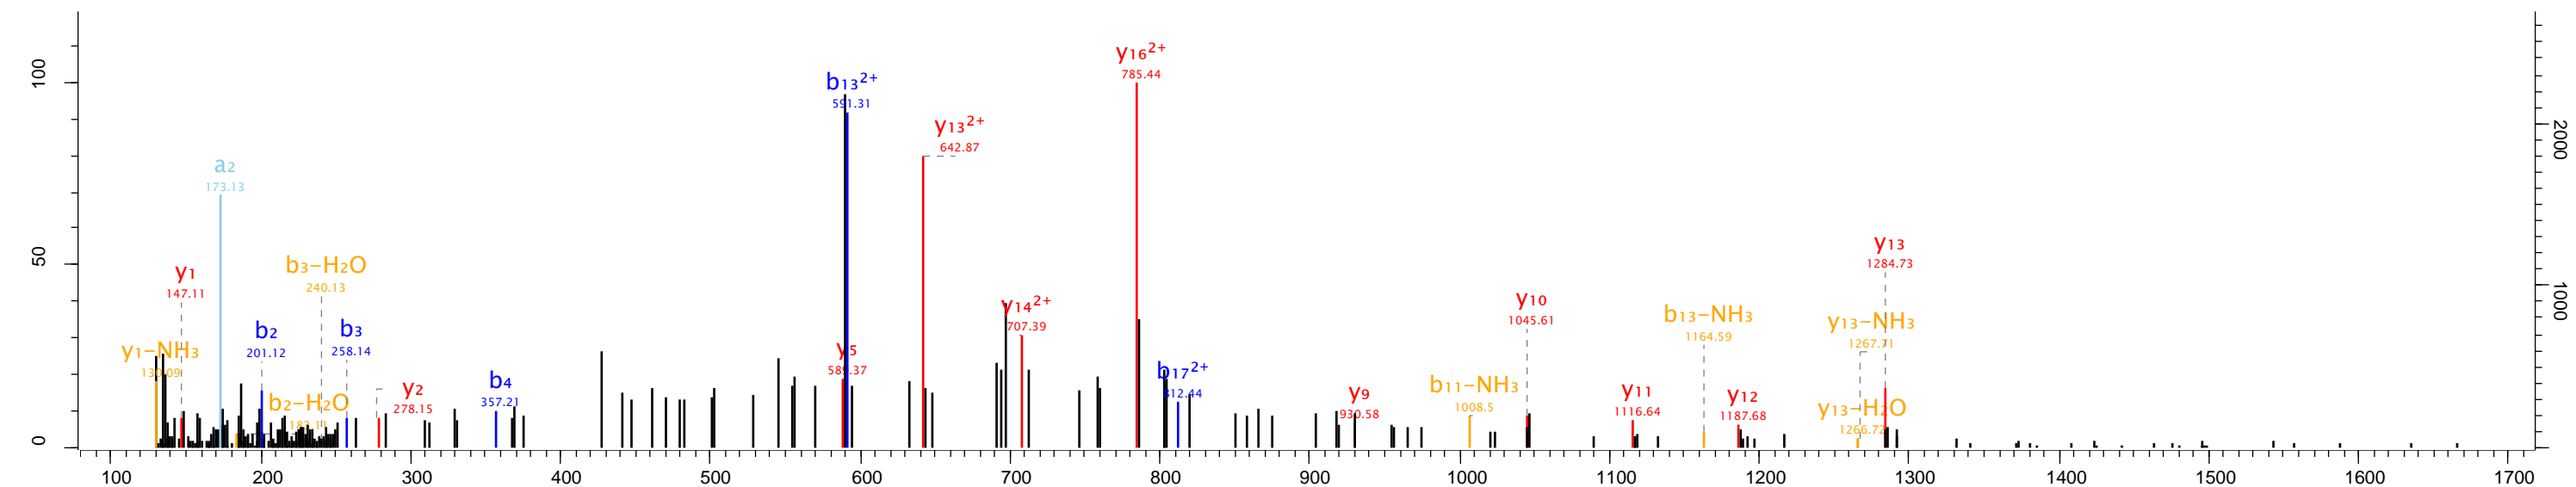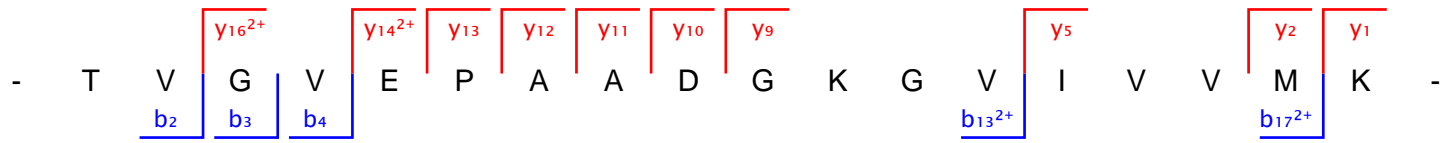

Spectral Annotation for Single-Peptide IDs between Single D11 Cells using Q-OT-LIT

Raw file 2015-01-08\_CL04\_Blastomere-15 Scan 34875 Method ITMS; HCD Score 53.39 m/z 591

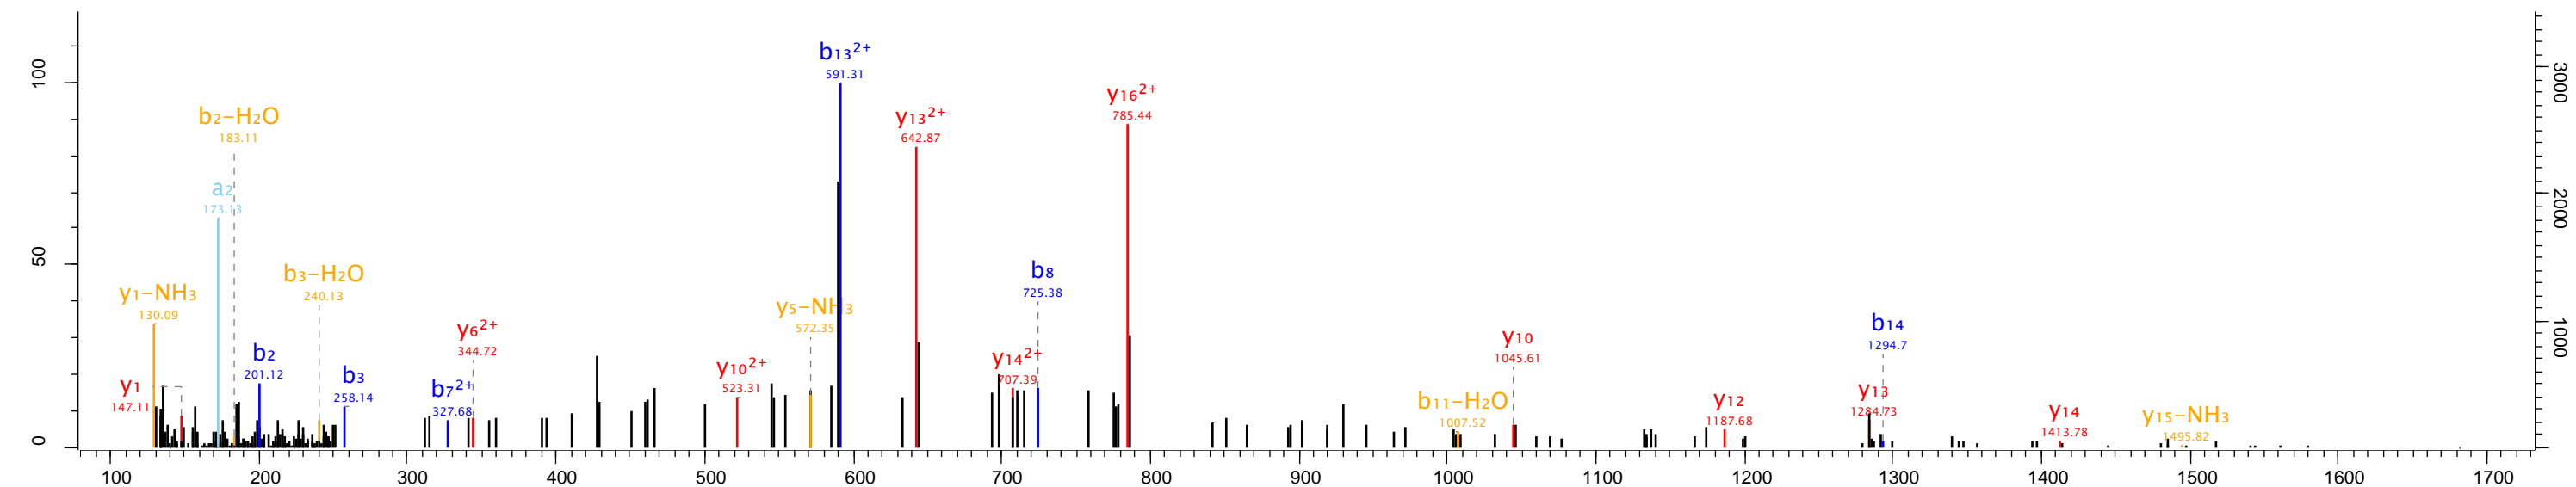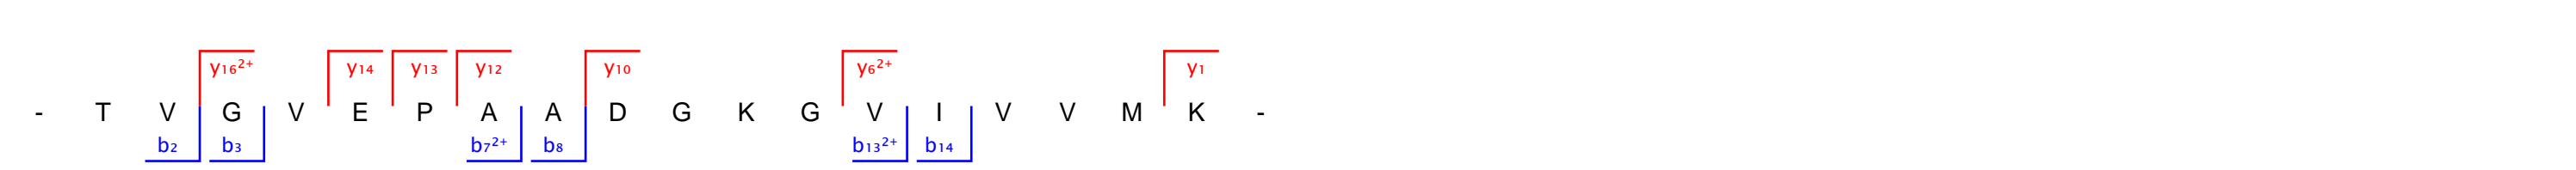

Spectral Annotation for Single-Peptide IDs between Single D11 Cells using Q-OT-LIT

Raw file 2015-01-08\_CL04\_Blastomere-15 Scan 35035 Method ITMS; HCD Score 50.18 m/z 638.1

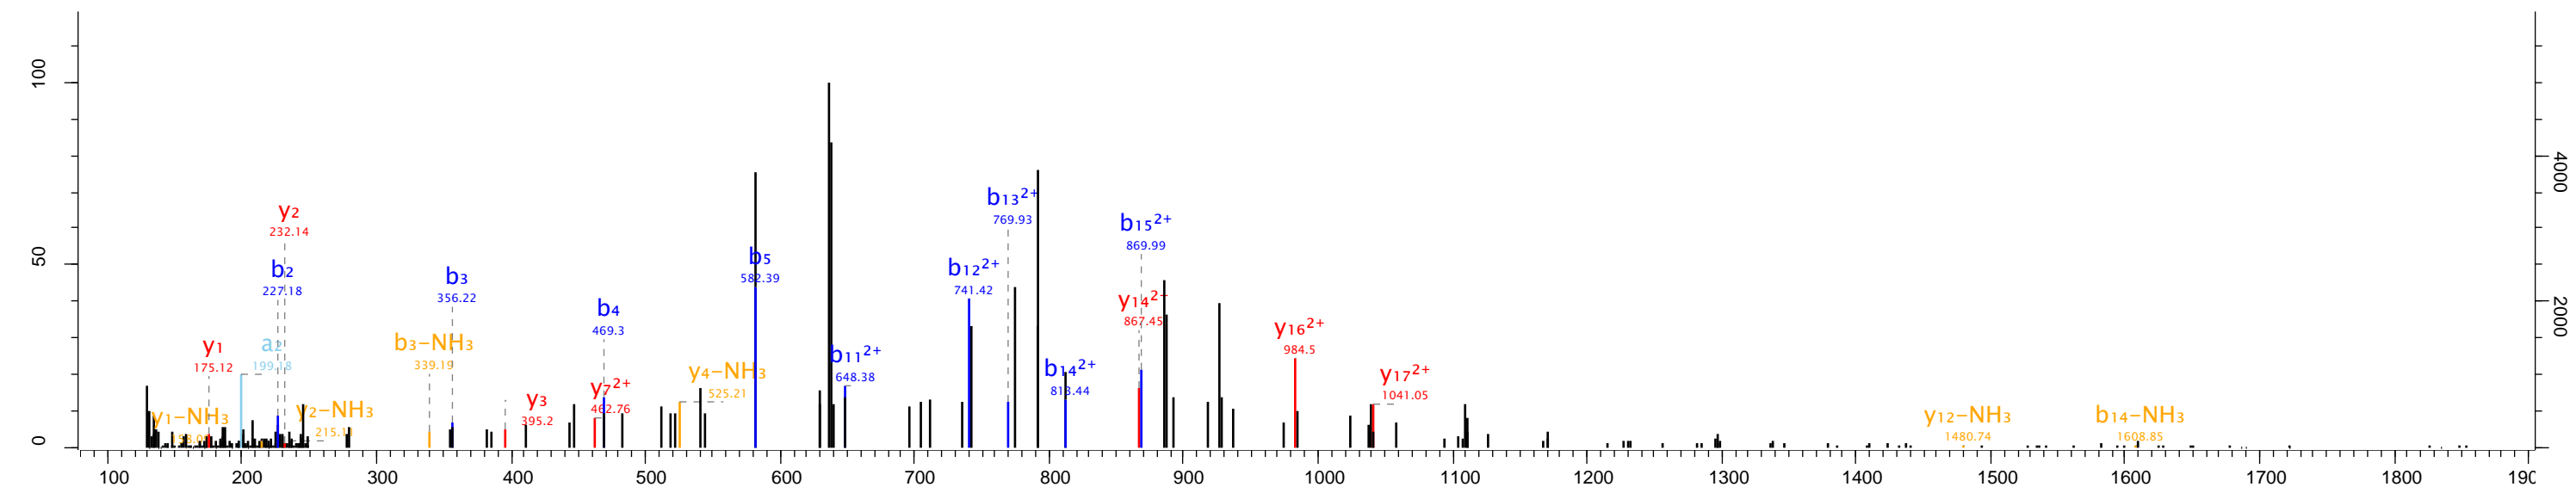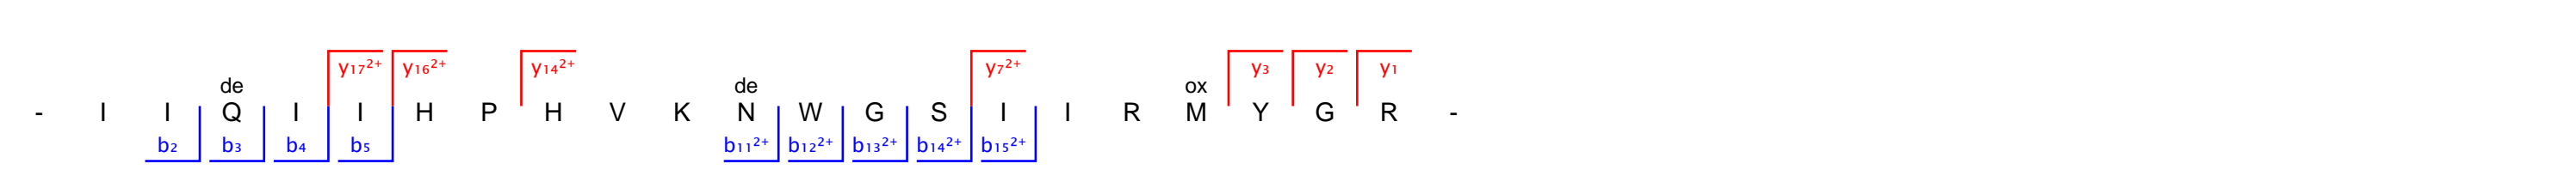

Spectral Annotation for Single-Peptide IDs between Single D11 Cells using Q-OT-LIT

Raw file 2015-01-08\_CL04\_Blastomere-15 Scan 35066 Method ITMS; HCD Score 42.06 m/z 757.13

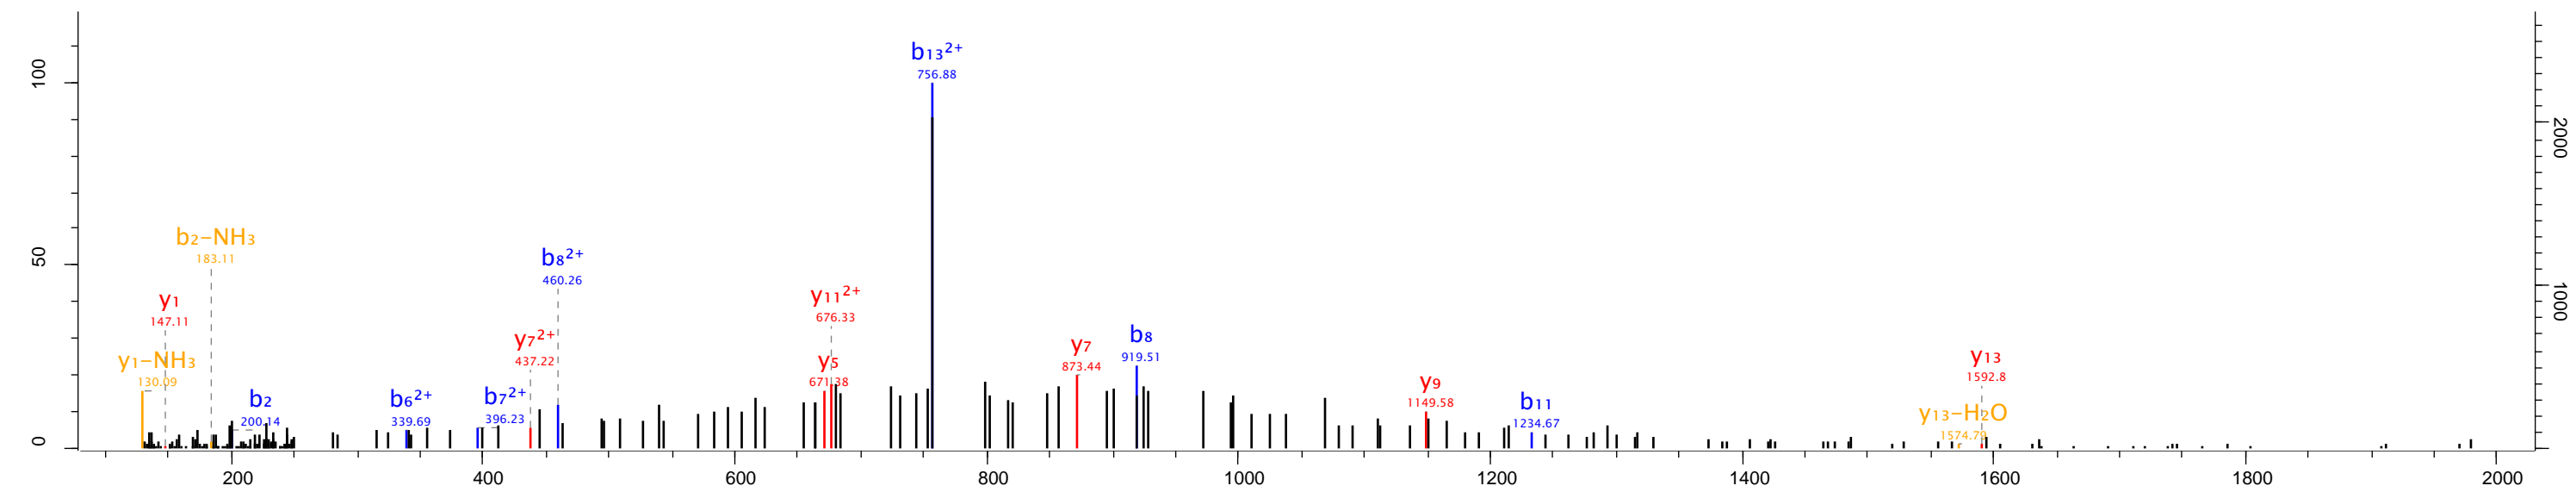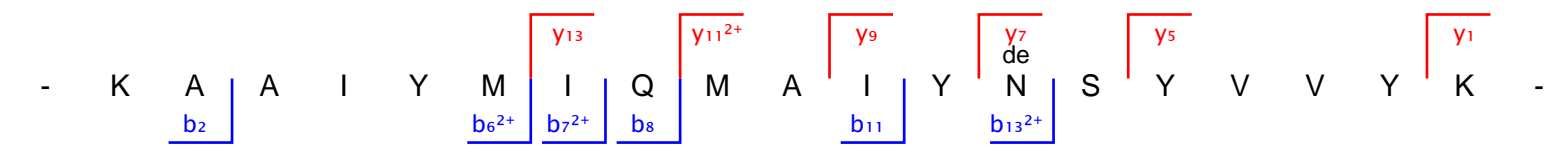

Spectral Annotation for Single-Peptide IDs between Single D11 Cells using Q-OT-LIT

Raw file: 2015-01-08\_CL04\_Blastomere-15  
 Scan: 35152 Method: ITMS; HCD Score: 82.67 m/z: 496.25

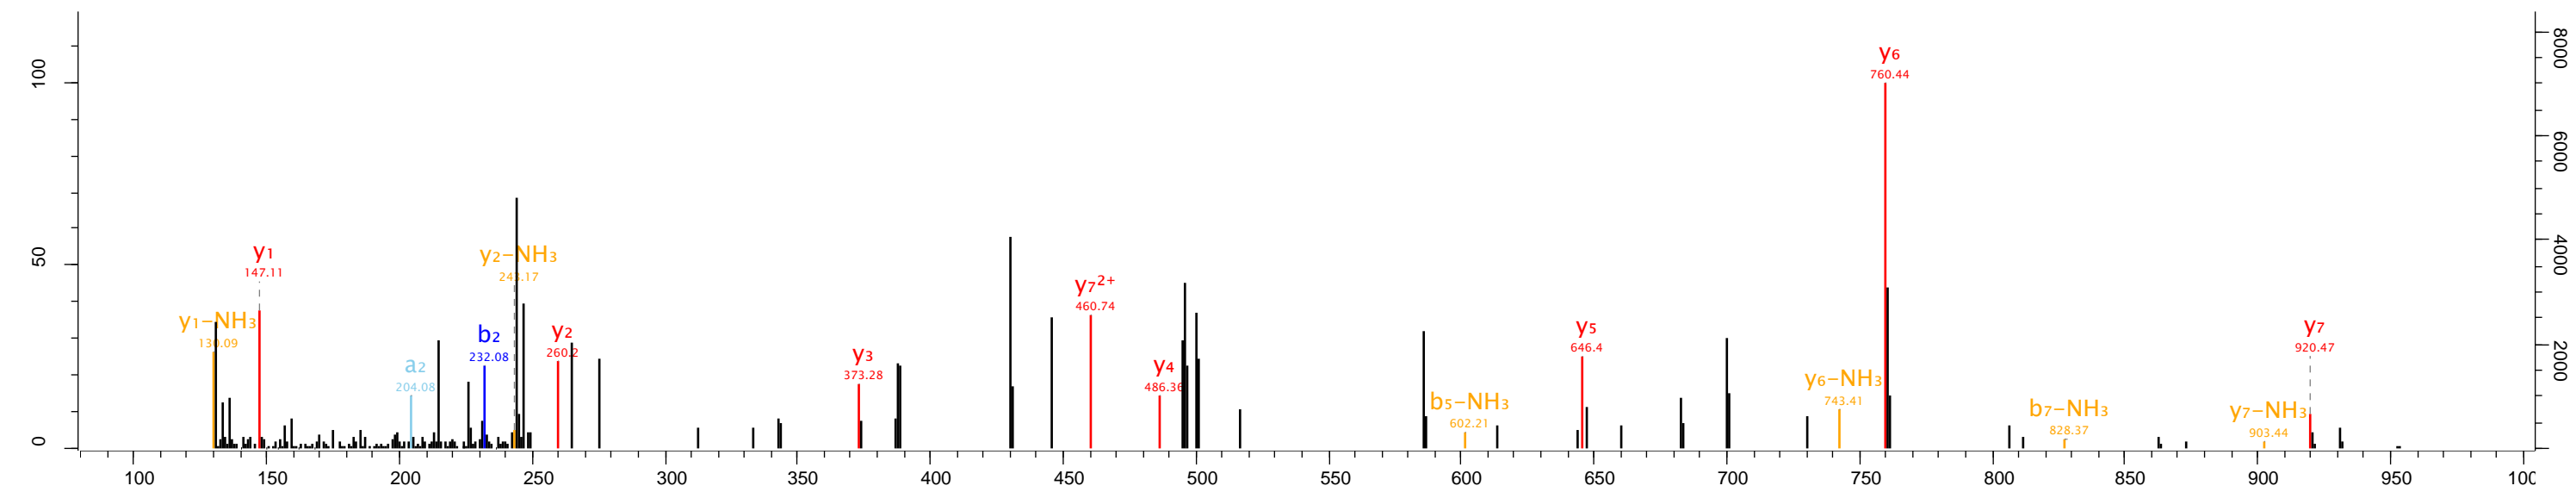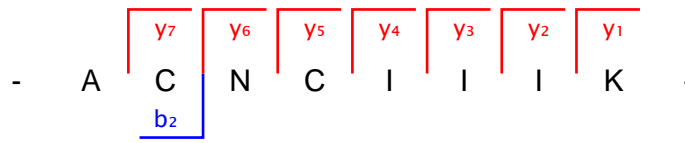

Raw file 2015-01-08\_CL04\_Blastomere-15 Scan 35172 Method ITMS; HCD Score 111.95 m/z 452.73

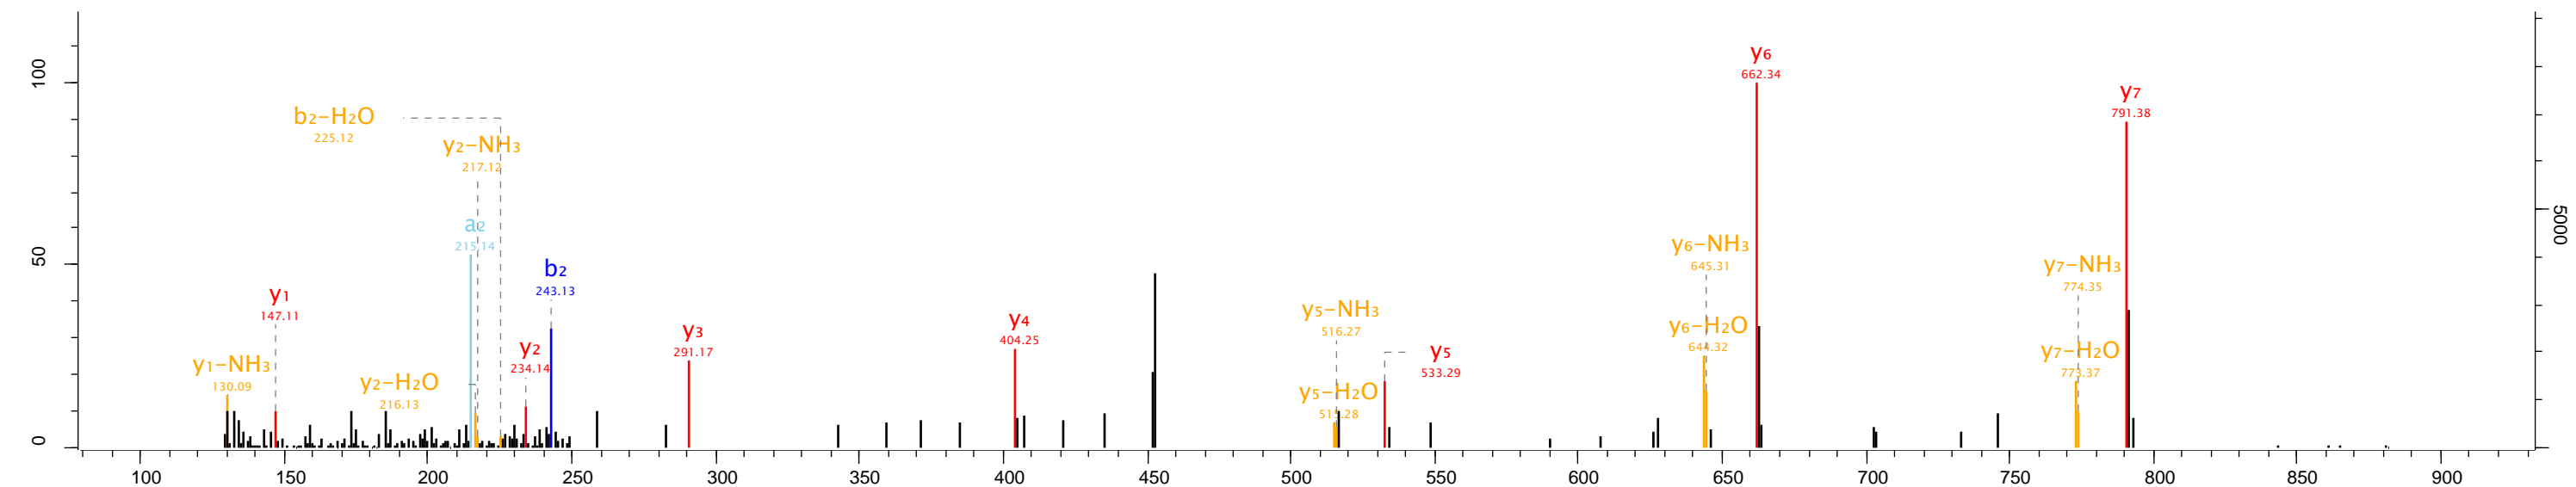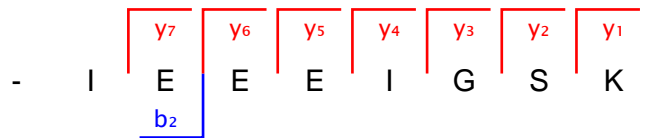

Raw file: 2015-01-08\_CL04\_Blastomere-15  
 Scan: 35197 Method: ITMS; HCD Score: 122.52 m/z: 452.73

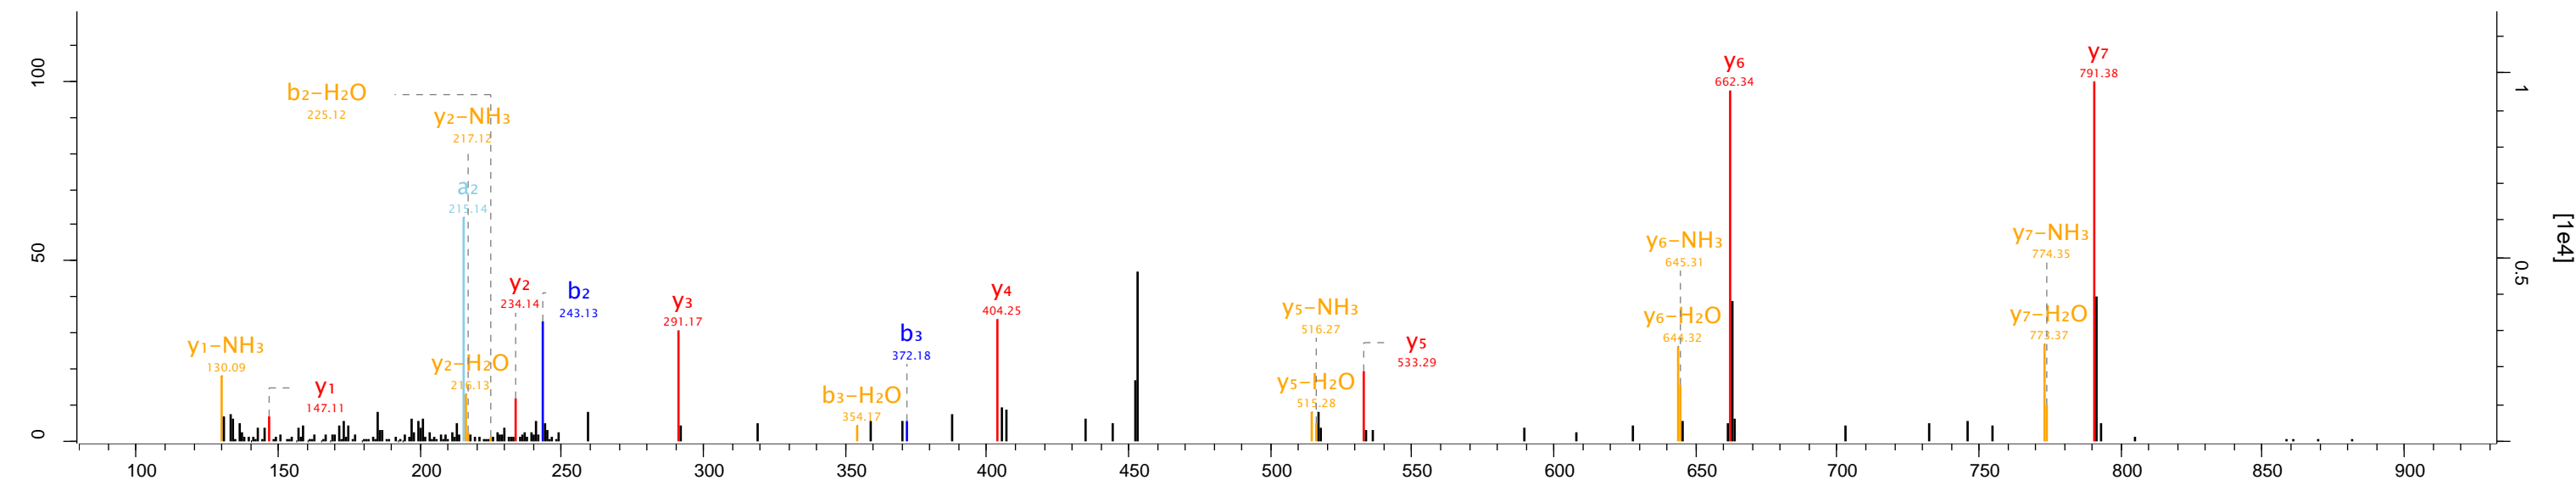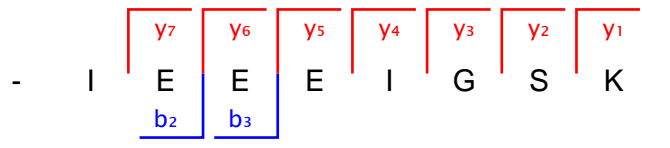

Raw file 2015-01-08\_CL04\_Blastomere-15 Scan 35213 Method ITMS; HCD Score 122.52 m/z 452.73

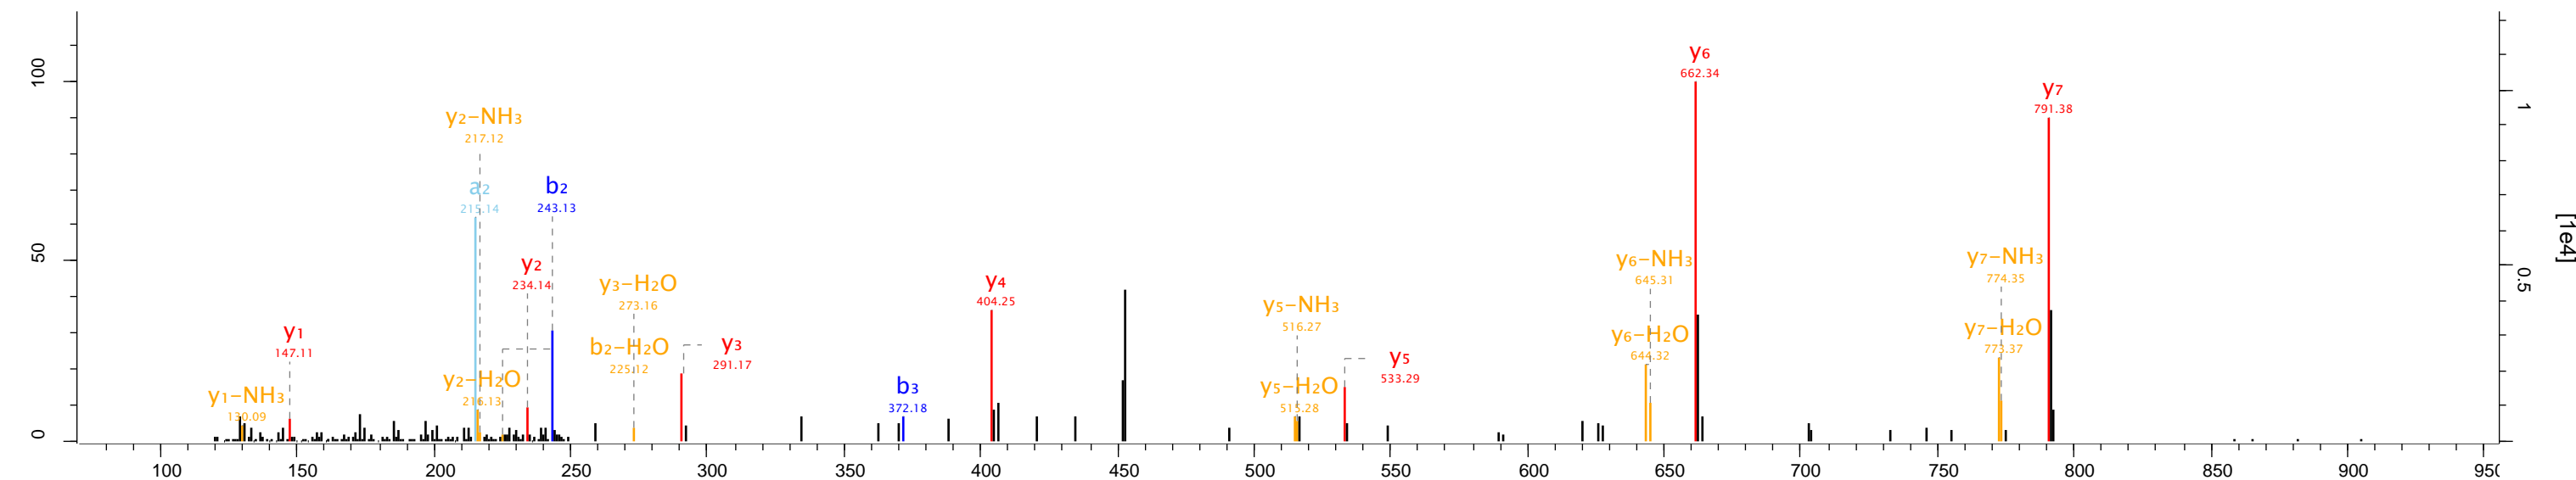



Raw file 2015-01-08\_CL04\_Blastomere-15 Scan 35452 Method ITMS; HCD Score 96.03 m/z 451.27

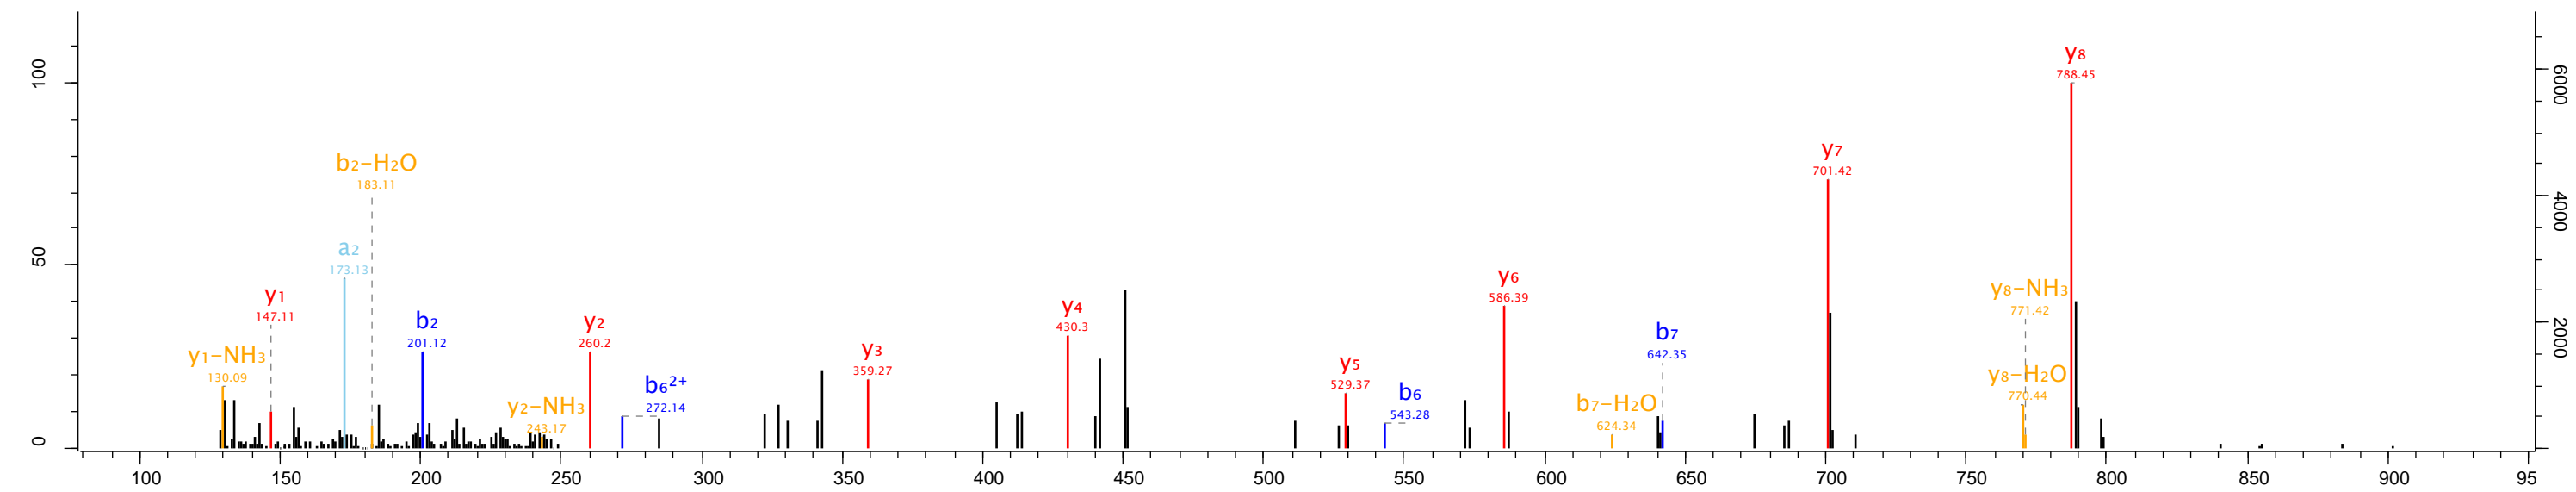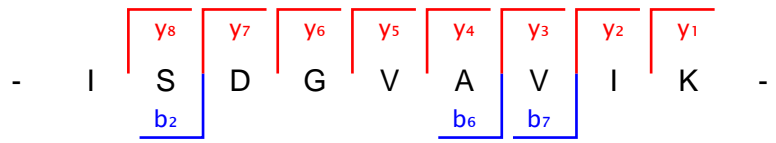

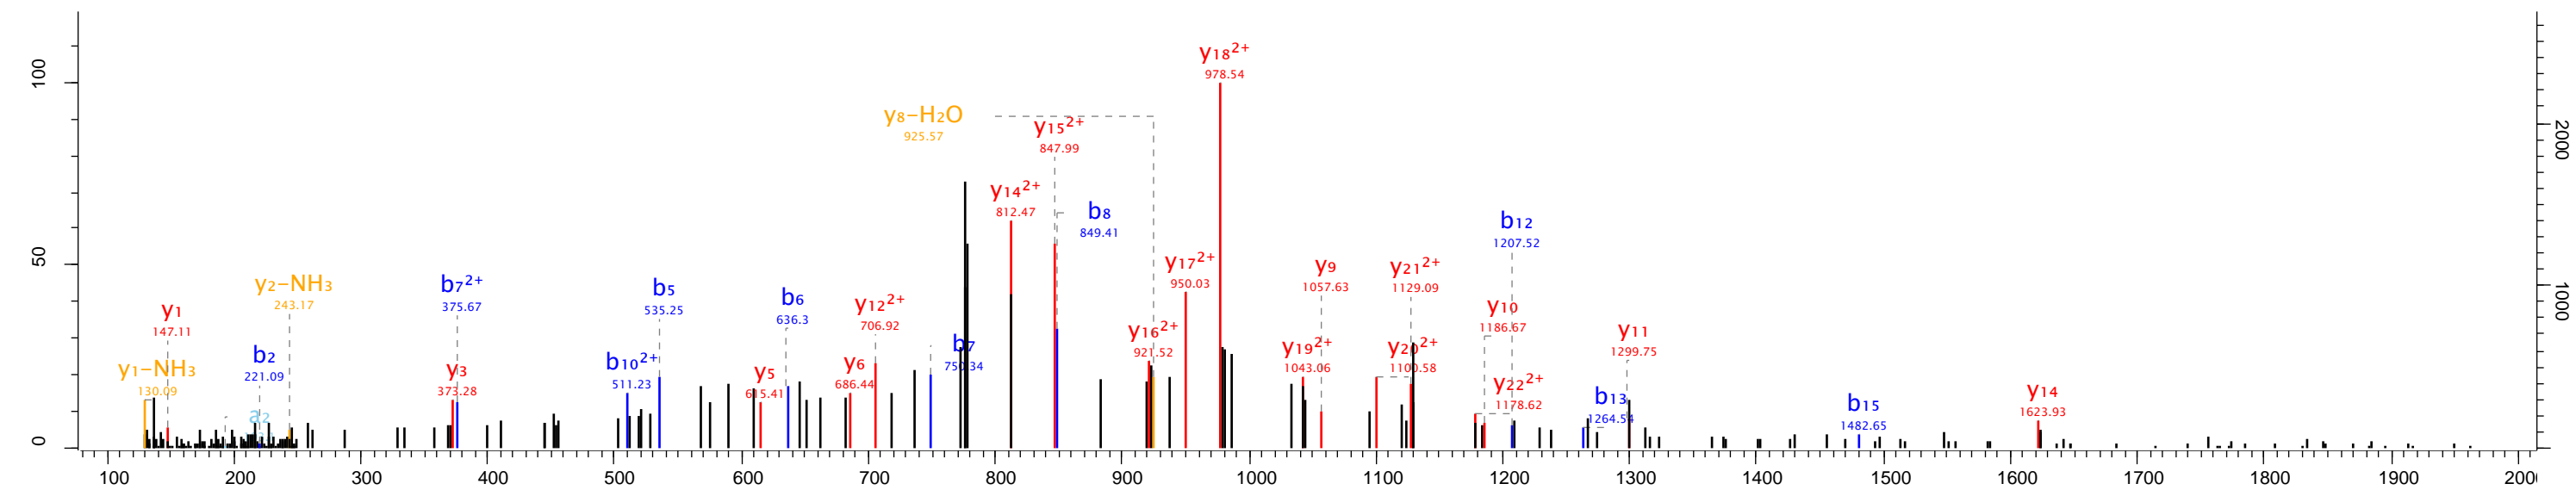

- Y G K D A T N V G D E G G F A P N I I E N K E A I E I I K -

Fragmentation sites are indicated by brackets below the peptide sequence:

- Blue brackets (b ions): b<sub>2</sub> (G), b<sub>5</sub> (A), b<sub>6</sub> (T), b<sub>7</sub> (N), b<sub>8</sub> (V), b<sub>10</sub><sup>2+</sup> (D), b<sub>12</sub> (G), b<sub>13</sub> (G), b<sub>15</sub> (A)
- Red brackets (y ions): y<sub>22</sub><sup>2+</sup> (V), y<sub>21</sub><sup>2+</sup> (G), y<sub>20</sub><sup>2+</sup> (D), y<sub>19</sub><sup>2+</sup> (E), y<sub>18</sub><sup>2+</sup> (G), y<sub>17</sub><sup>2+</sup> (G), y<sub>16</sub><sup>2+</sup> (F), y<sub>15</sub><sup>2+</sup> (A), y<sub>14</sub> (P), y<sub>12</sub><sup>2+</sup> (I), y<sub>11</sub> (I), y<sub>10</sub> (E), y<sub>9</sub> (N), y<sub>6</sub> (A), y<sub>5</sub> (I), y<sub>3</sub> (E), y<sub>1</sub> (I)

Raw file  
 2015-01-08\_CL04\_Blastomere-15  
 Scan 35887 Method ITMS; HCD Score 38.05 m/z 777.4

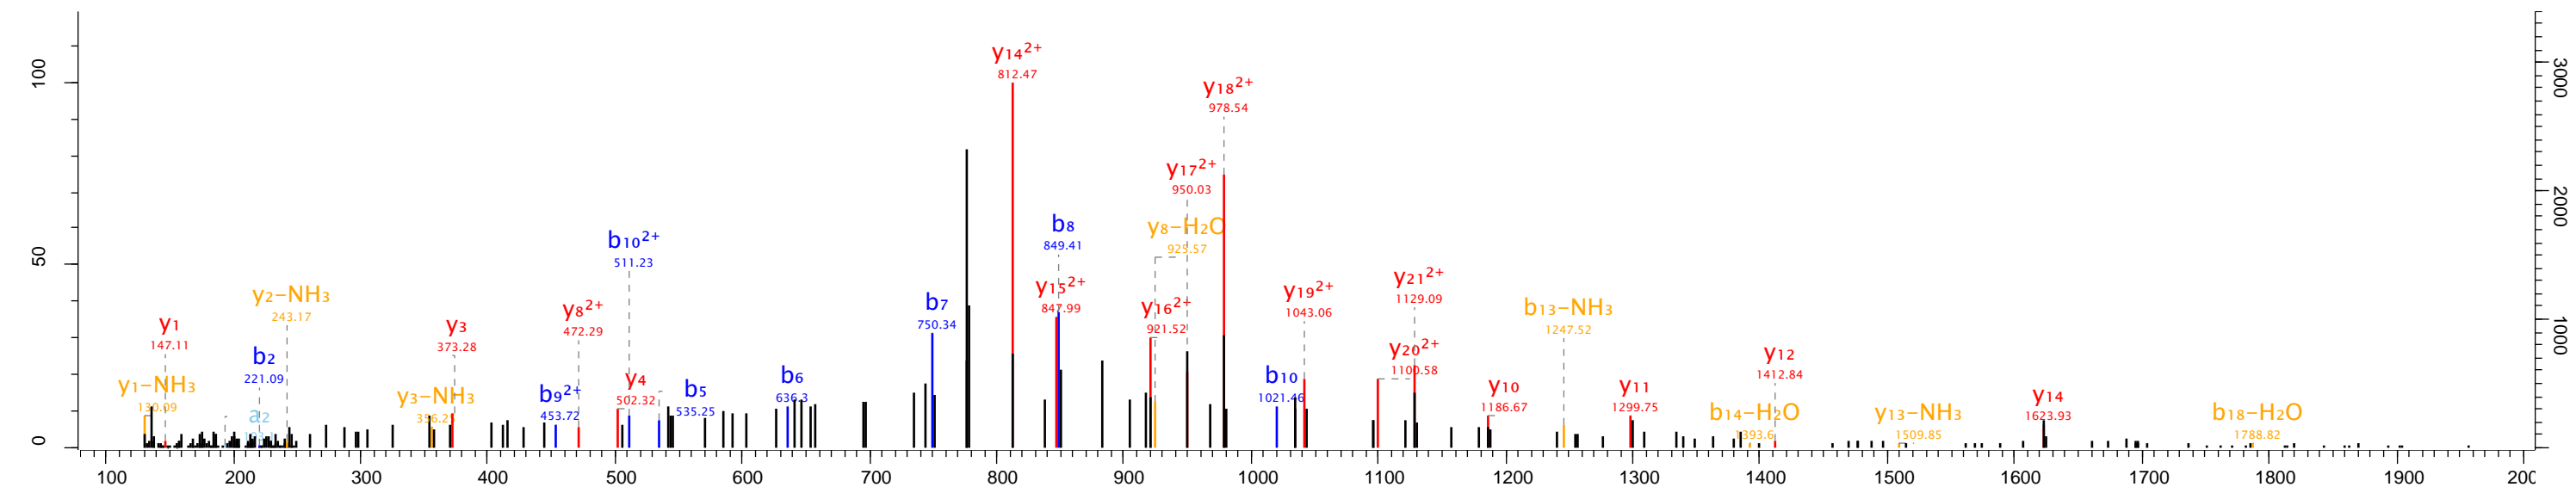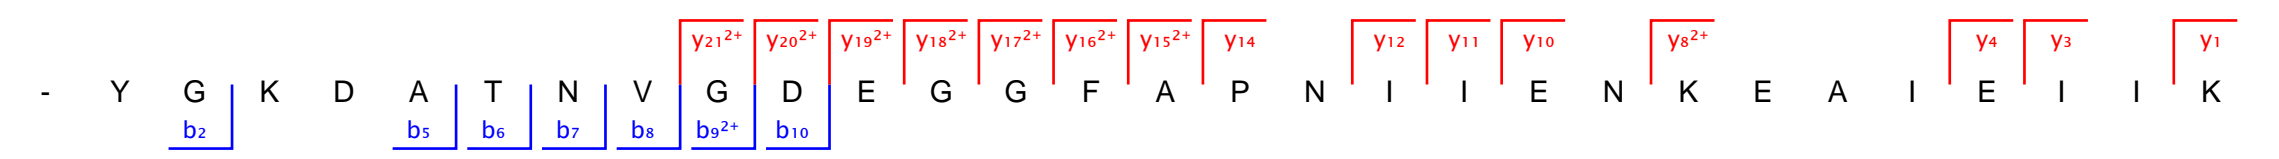

Spectral Annotation for Single-Peptide IDs between Single D11 Cells using Q-OT-LIT

Raw file 2015-01-08\_CL04\_Blastomere-15 Scan 36029 Method ITMS; HCD Score 41.74 m/z 696.31

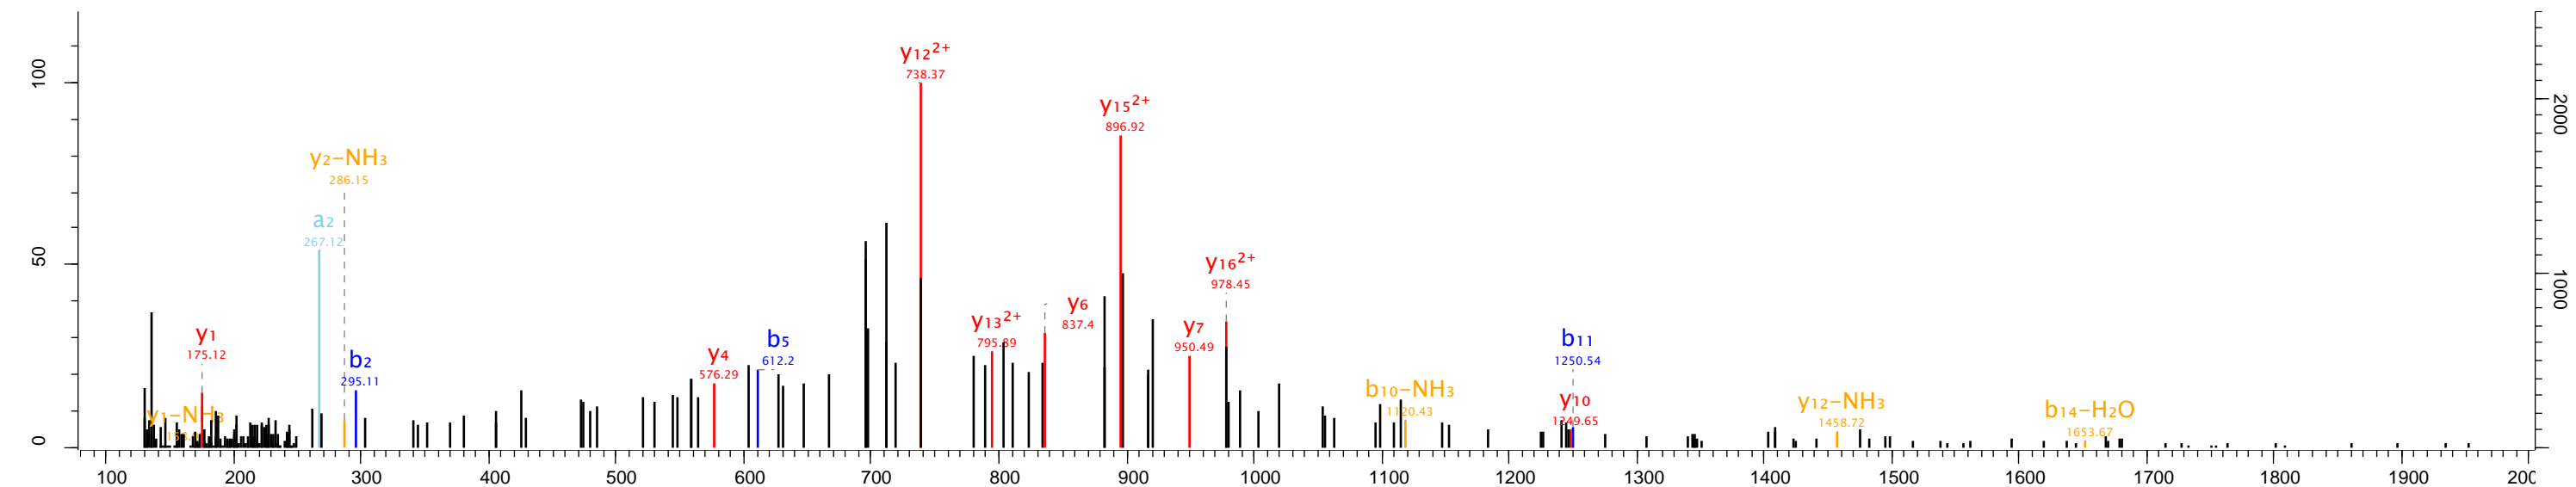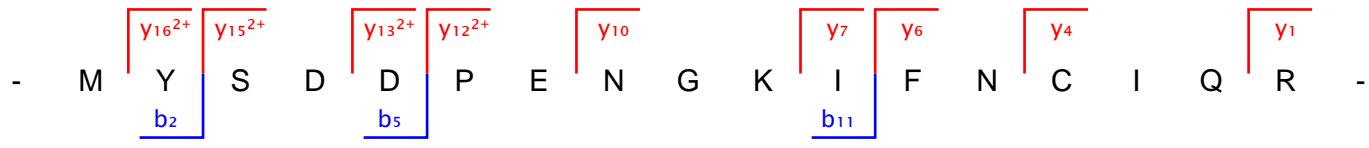

Spectral Annotation for Single-Peptide IDs between Single D11 Cells using Q-OT-LIT

Raw file 2015-01-08\_CL04\_Blastomere-15 Scan 36232 Method ITMS; HCD Score 64.71 m/z 516.3

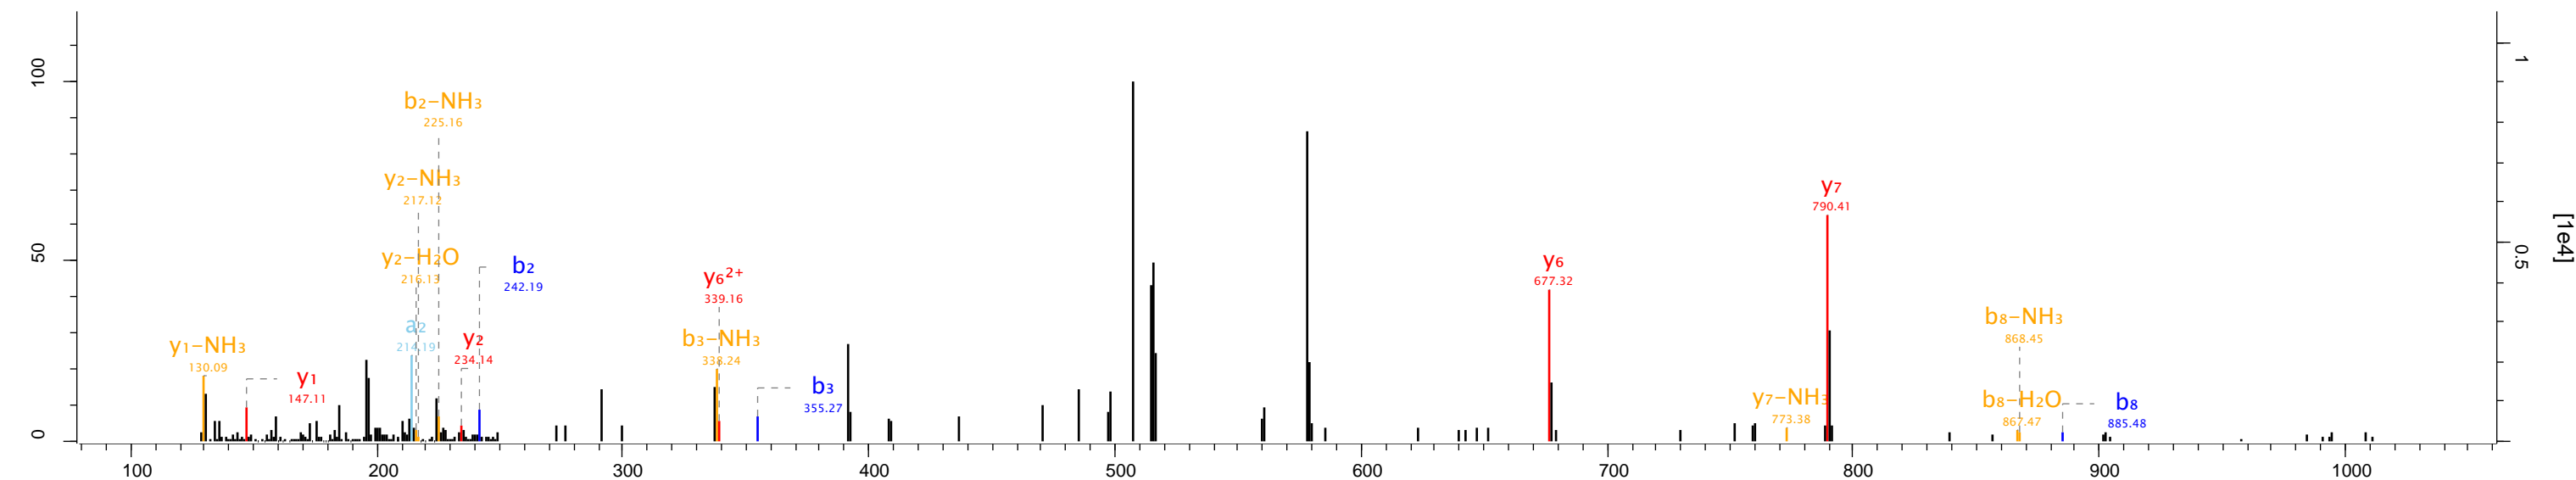

Spectral Annotation for Single-Peptide IDs between Single D11 Cells using Q-OT-LIT

Raw file 2015-01-08\_CL04\_Blastomere-15 Scan 36309 Method ITMS; HCD Score 56.04 m/z 679.01

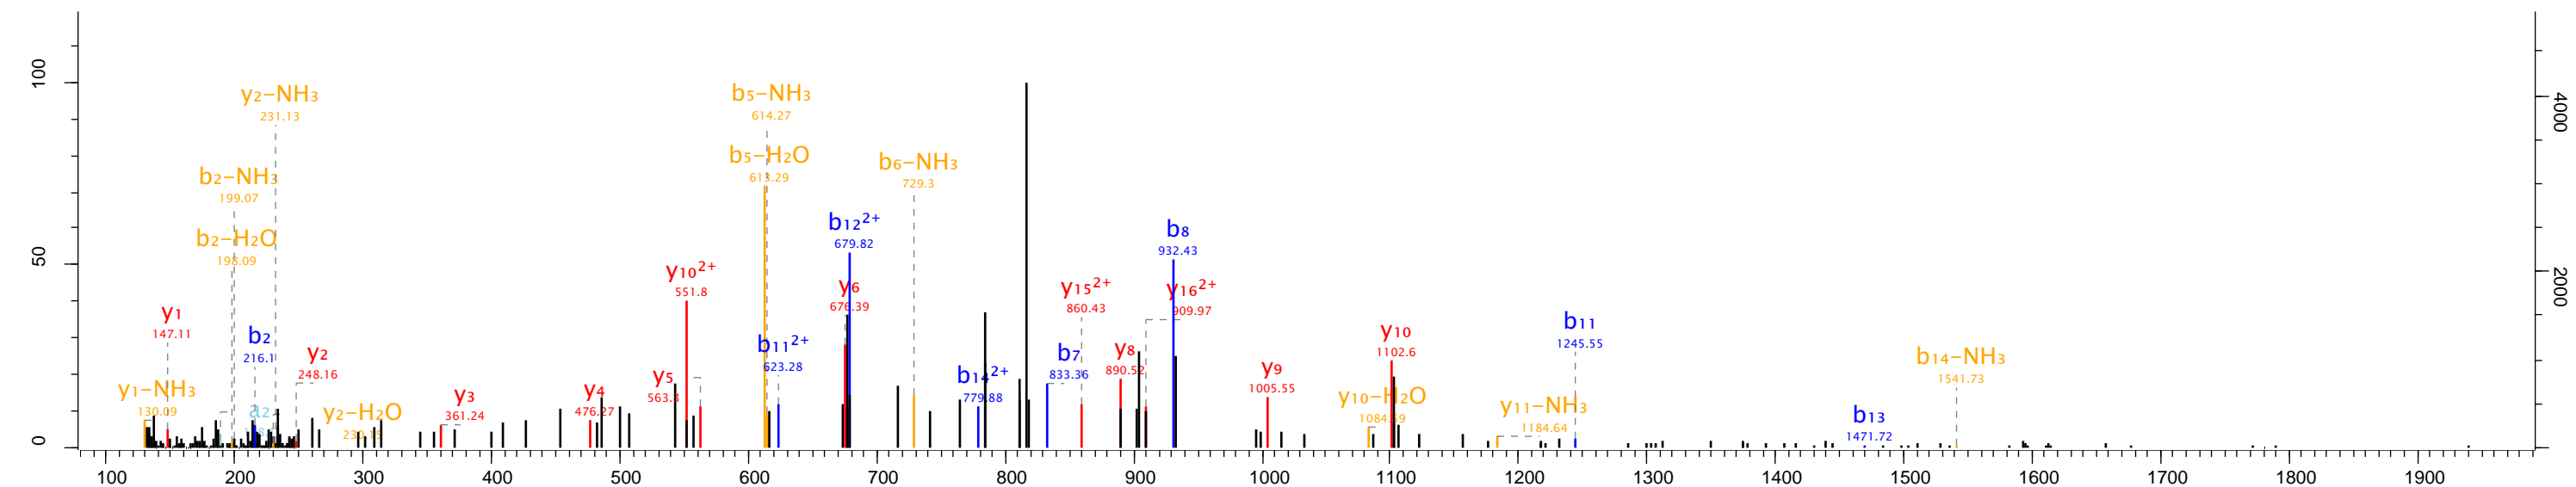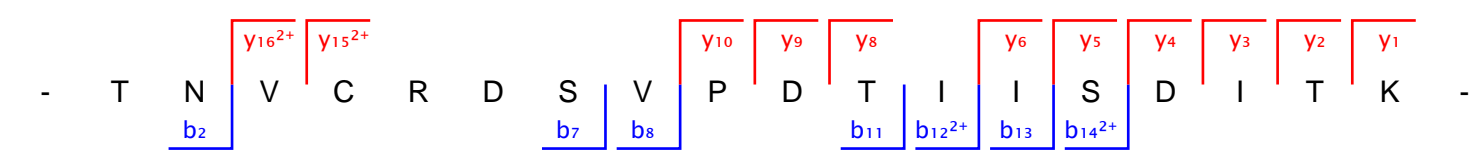

Spectral Annotation for Single-Peptide IDs between Single D11 Cells using Q-OT-LIT

Raw file 2015-01-08\_CL04\_Blastomere-15 Scan 36312 Method ITMS; HCD Score 69.2 m/z 505.26

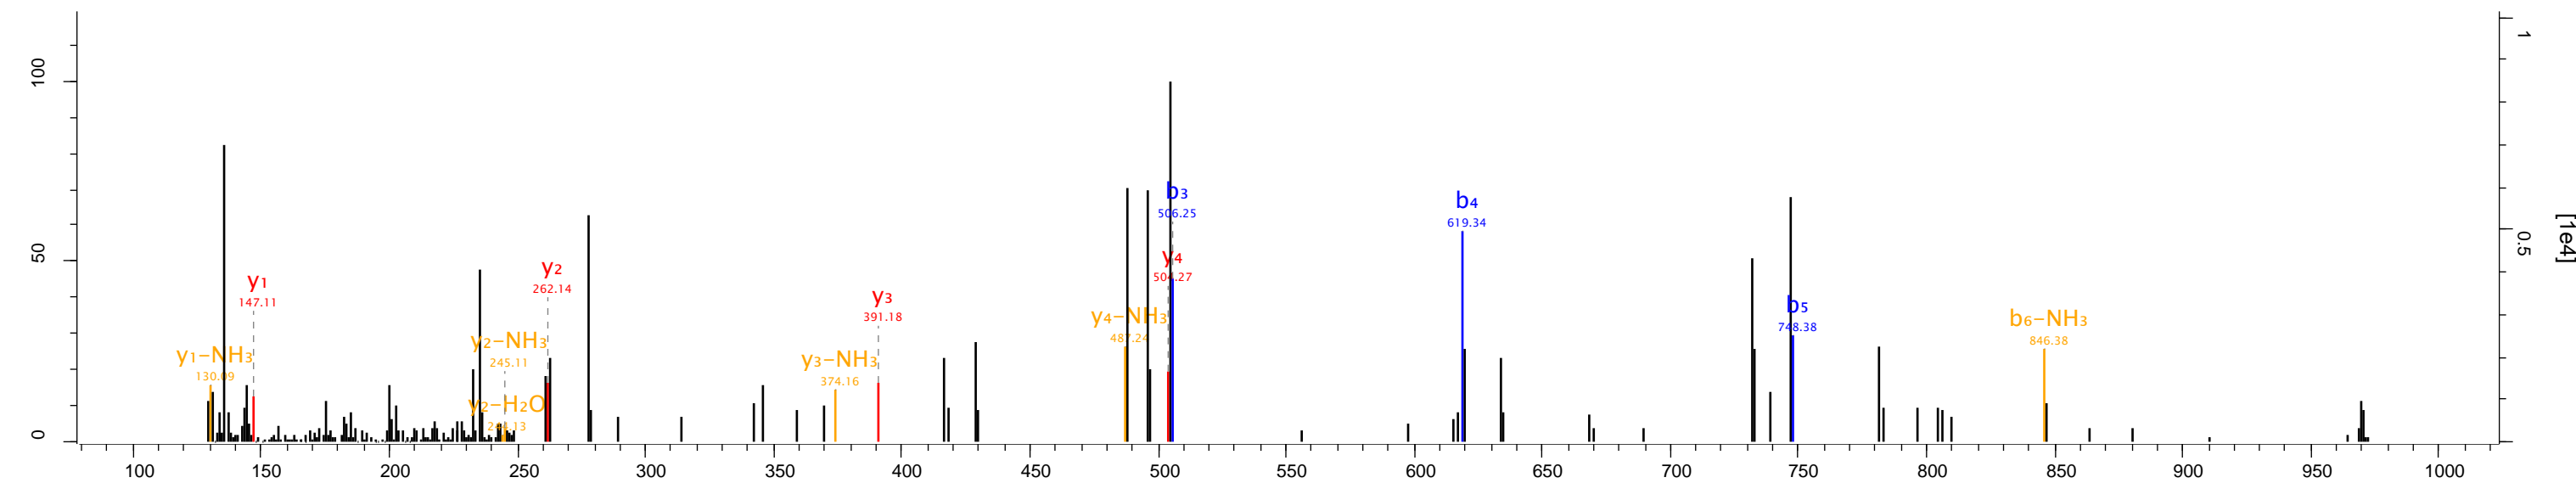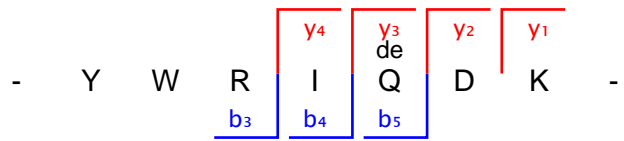

Raw file 2015-01-08\_CL04\_Blastomere-15 Scan 36325 Method ITMS; HCD Score 50.49 m/z 707.03

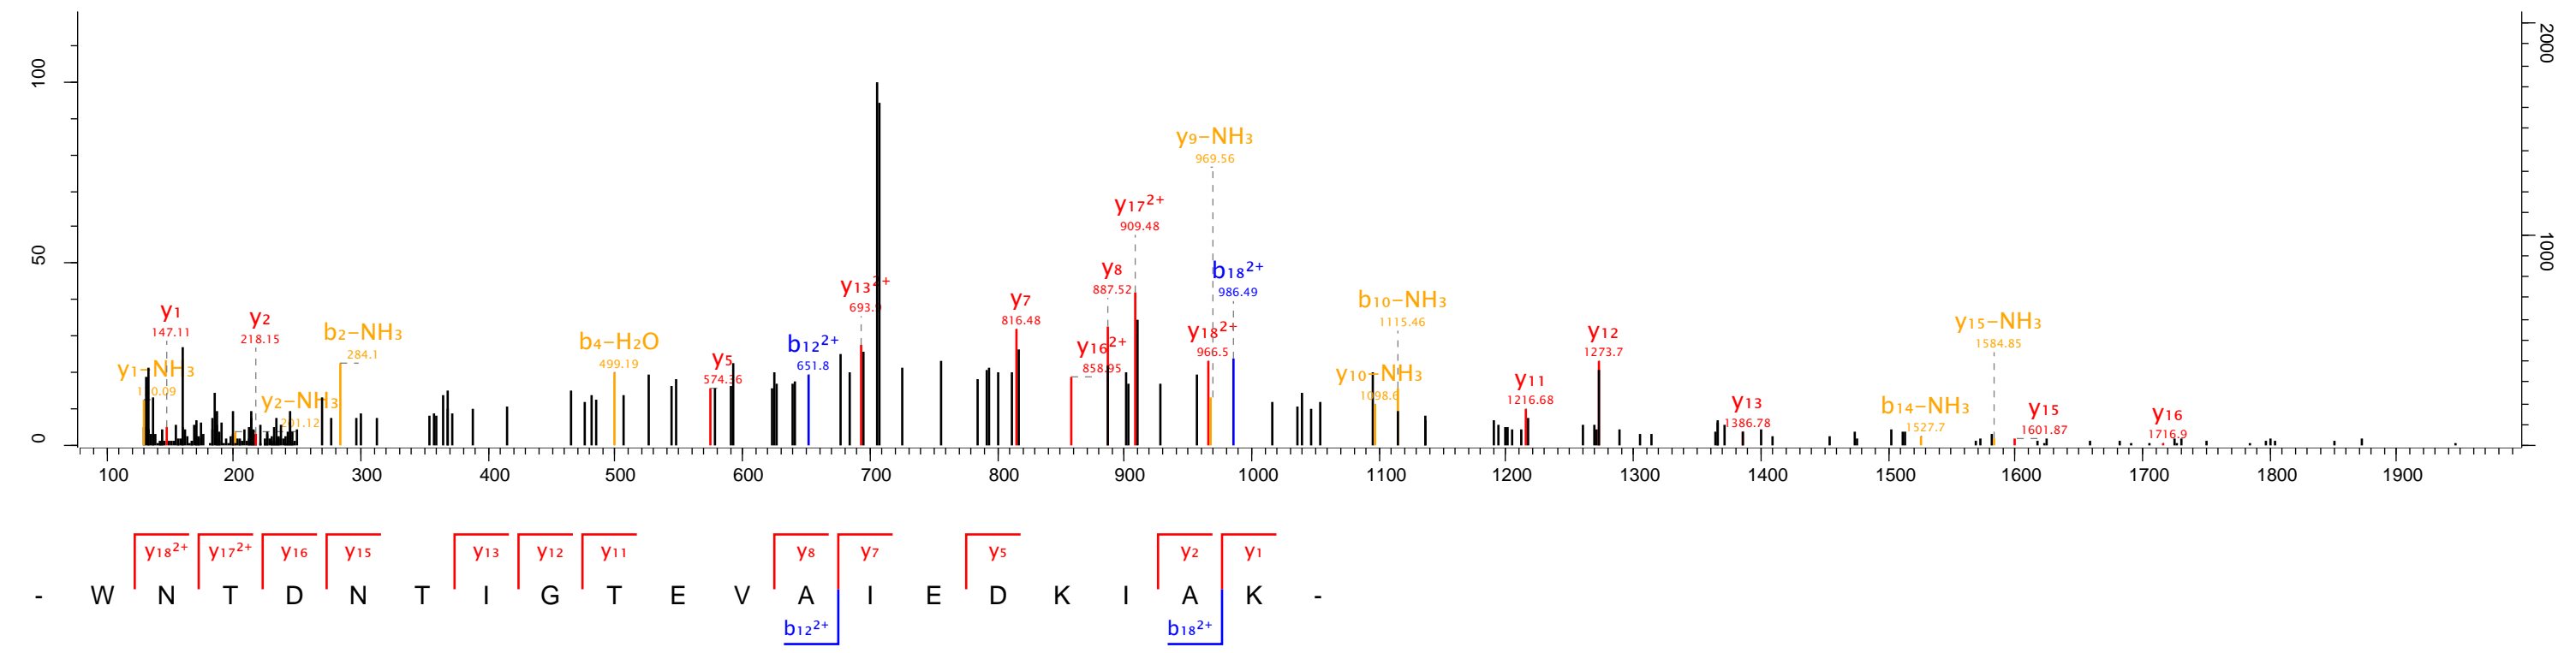

Spectral Annotation for Single-Peptide IDs between Single D11 Cells using Q-OT-LIT



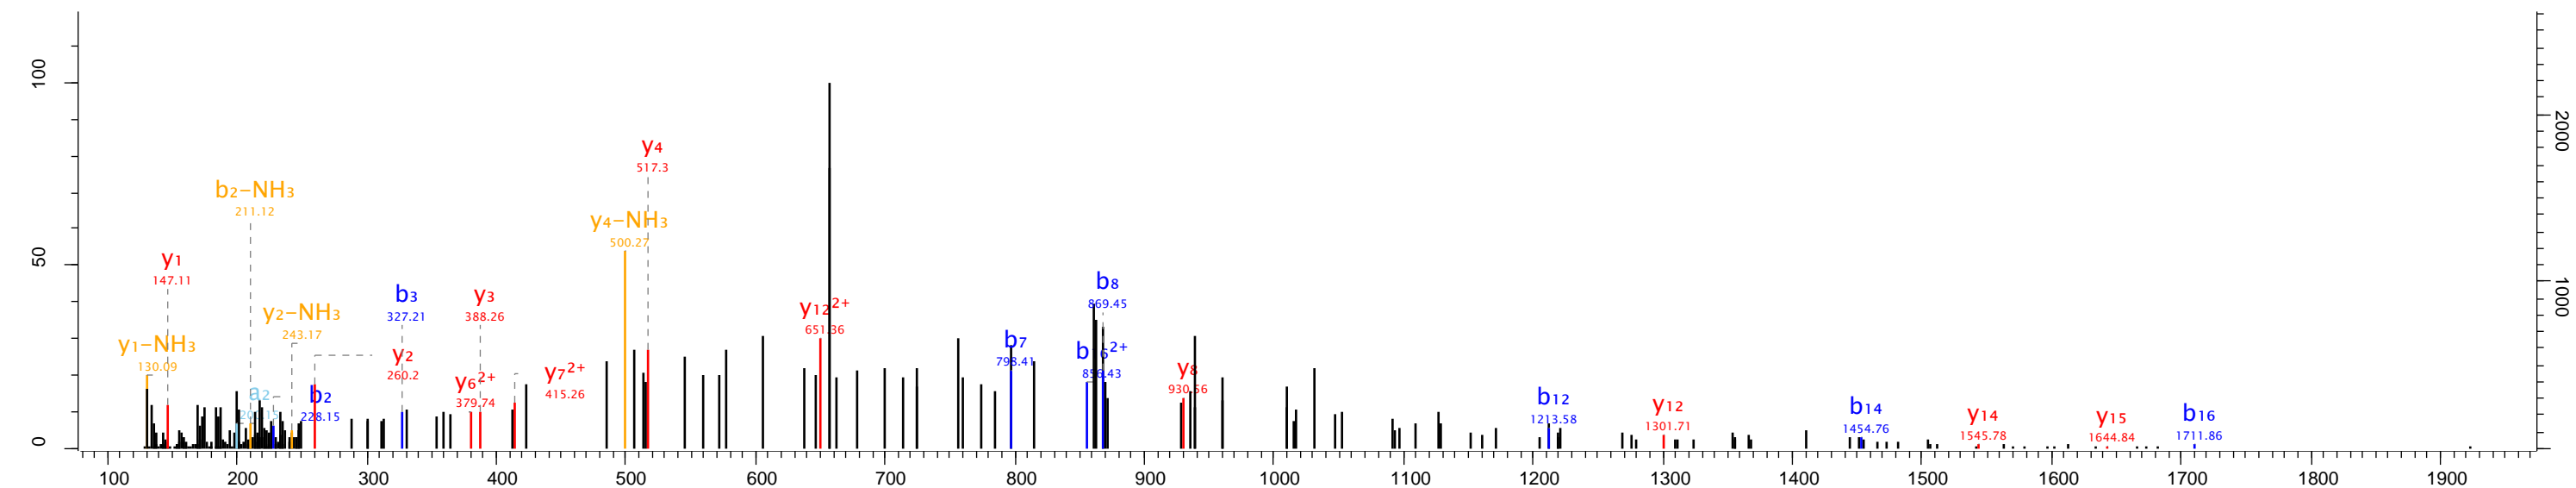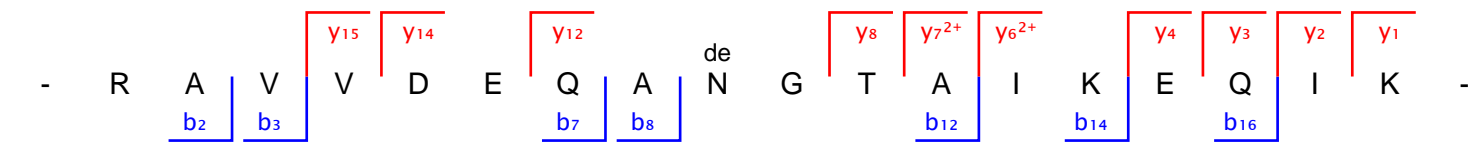

Raw file 2015-01-08\_CL04\_Blastomere-15 Scan 36544 Method ITMS; HCD Score 55.44 m/z 654.99

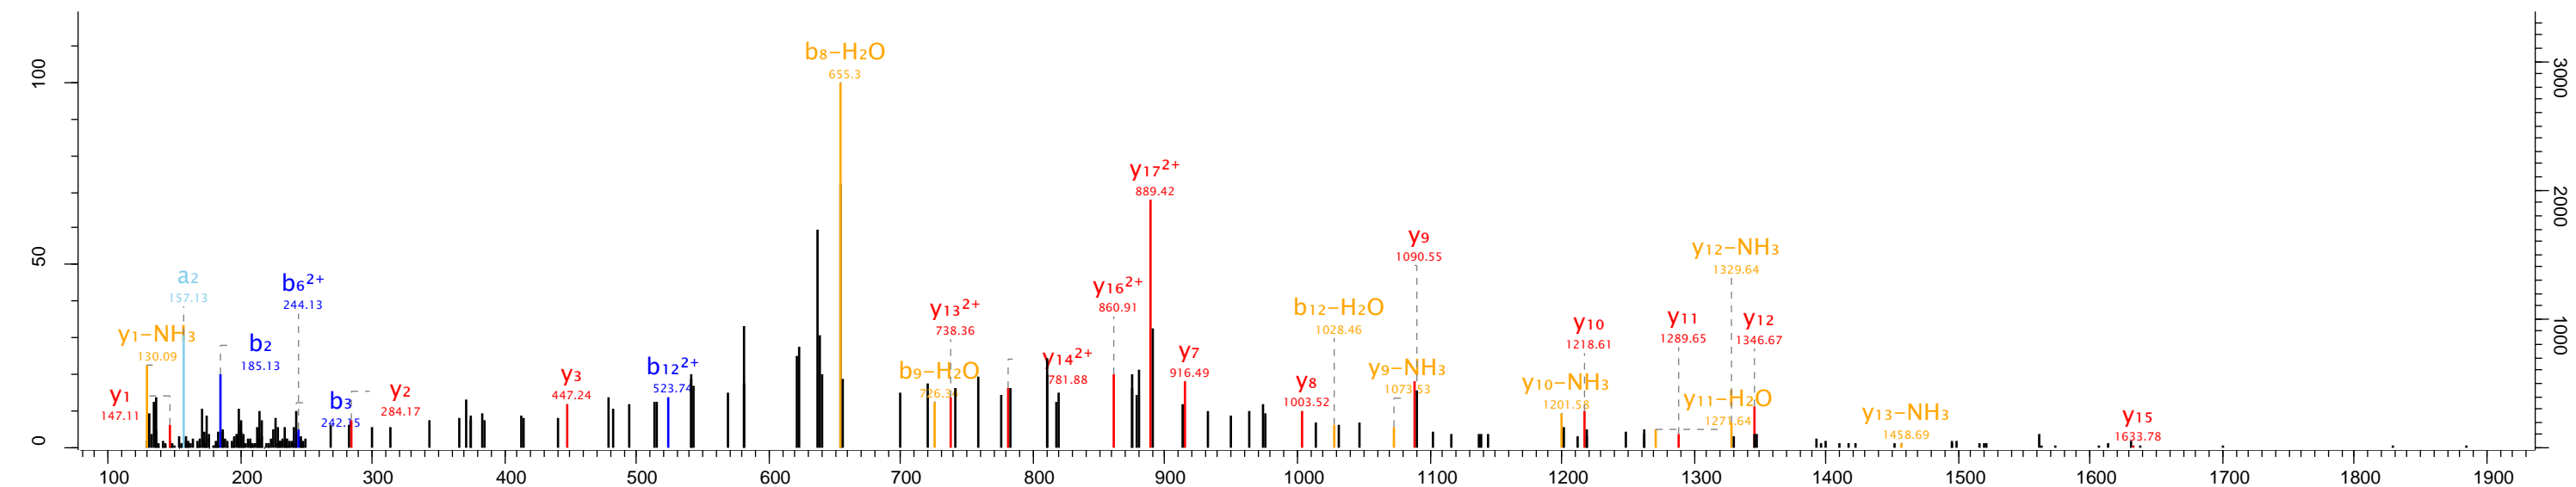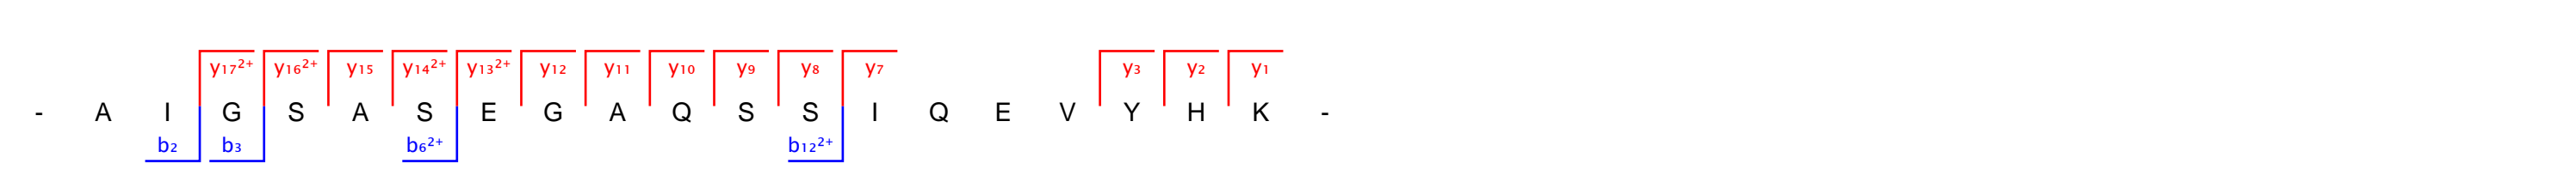

Spectral Annotation for Single-Peptide IDs between Single D11 Cells using Q-OT-LIT

Raw file Scan Method Score m/z  
 2015-01-08\_CL04\_Blastomere-15 36581 ITMS; HCD 62.44 699.02

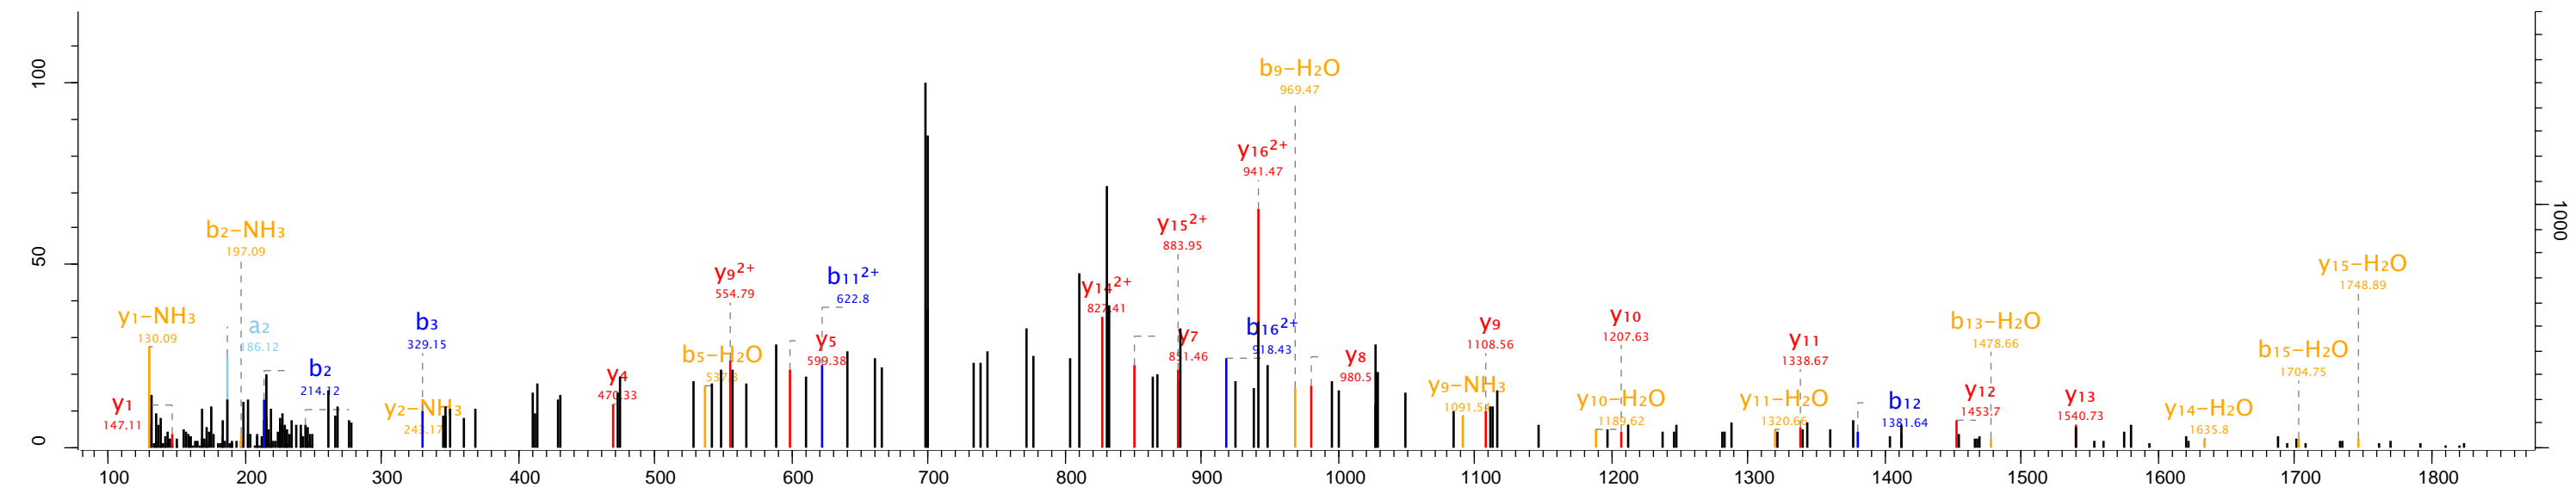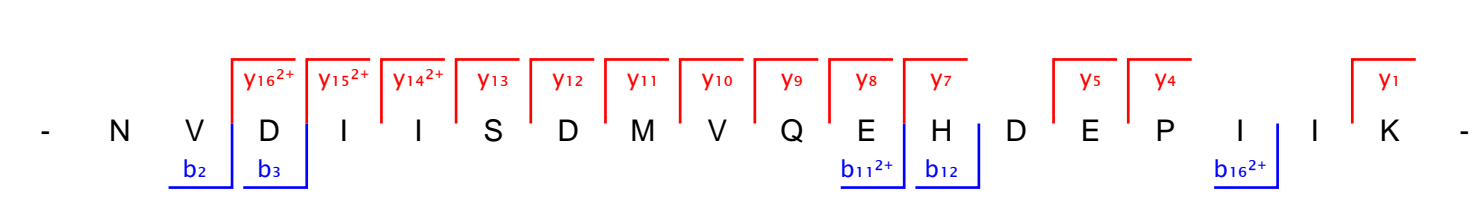

Spectral Annotation for Single-Peptide IDs between Single D11 Cells using Q-OT-LIT

Raw file 2015-01-08\_CL04\_Blastomere-15 Scan 36760 Method ITMS; HCD Score 55.66 m/z 696.64

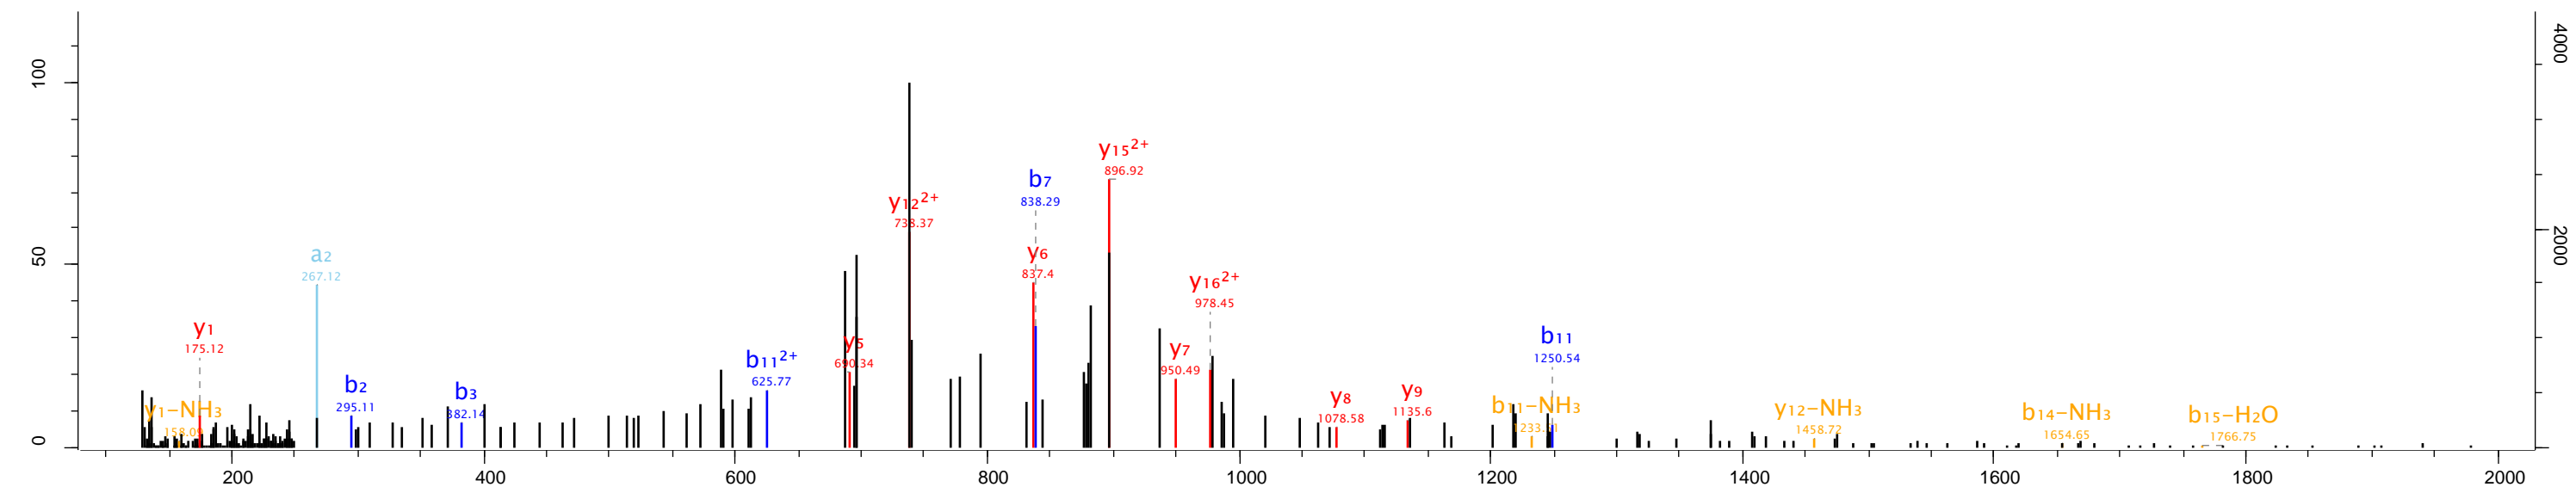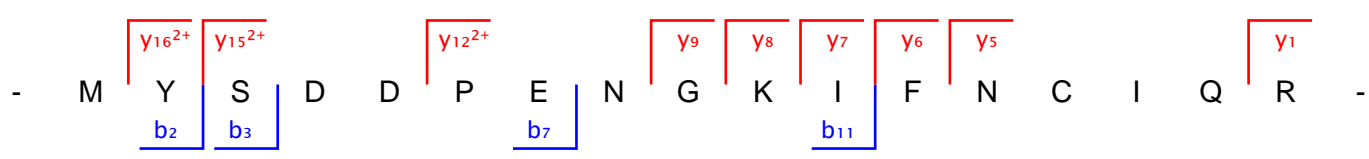

Spectral Annotation for Single-Peptide IDs between Single D11 Cells using Q-OT-LIT

Raw file 2015-01-08\_CL04\_Blastomere-15 Scan 36763 Method ITMS; HCD Score 94.41 m/z 542.77

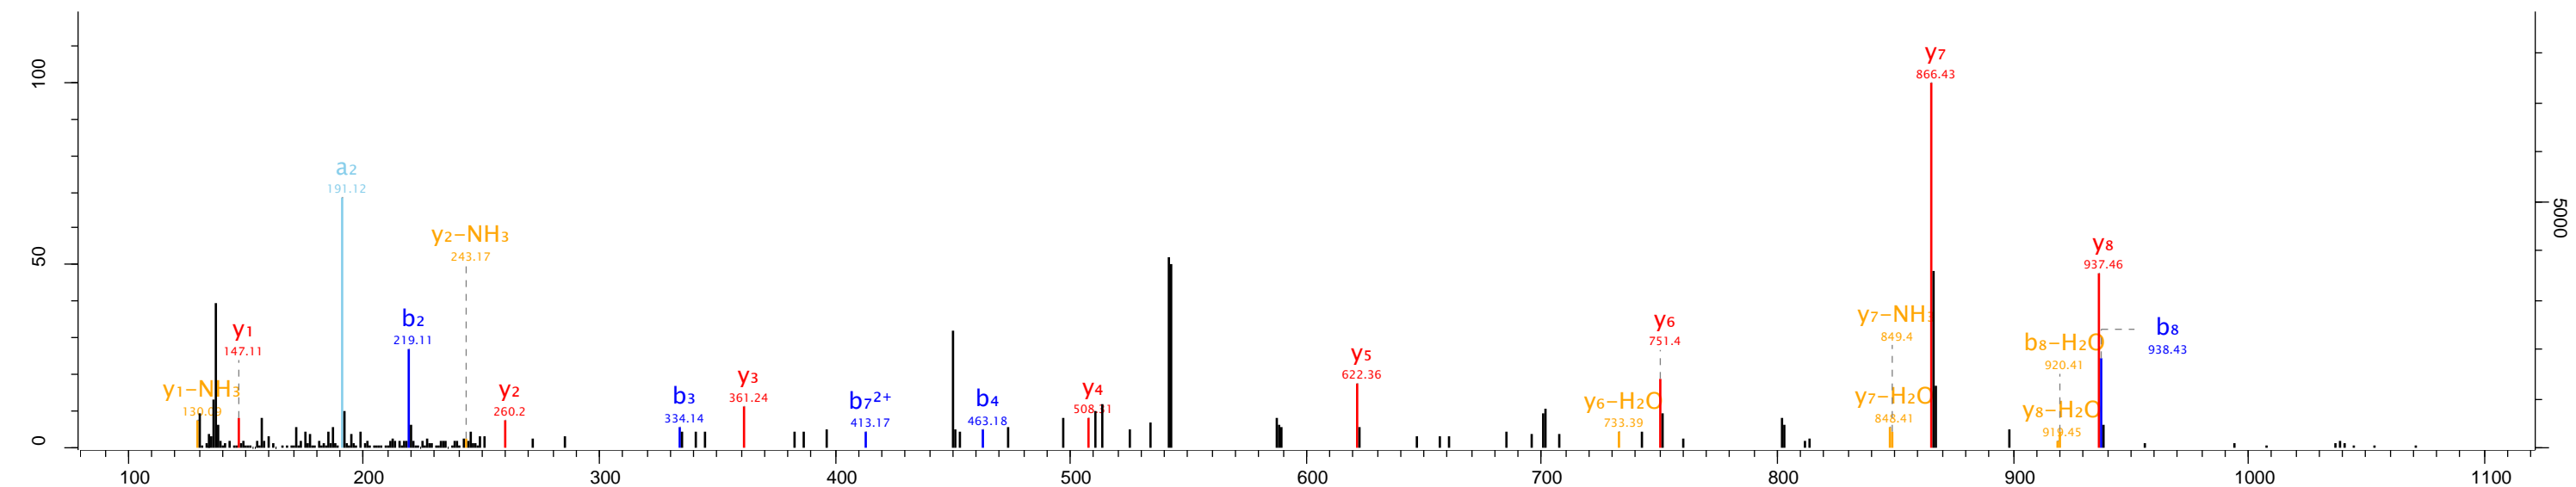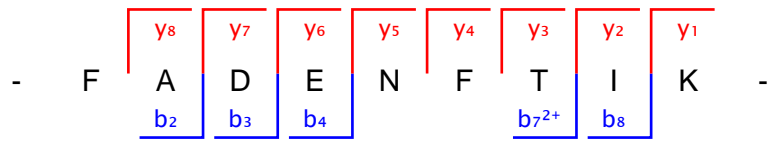

Spectral Annotation for Single-Peptide IDs between Single D11 Cells using Q-OT-LIT

Raw file 2015-01-08\_CL04\_Blastomere-15 Scan 36787 Method ITMS; HCD Score 101.25 m/z 565.27

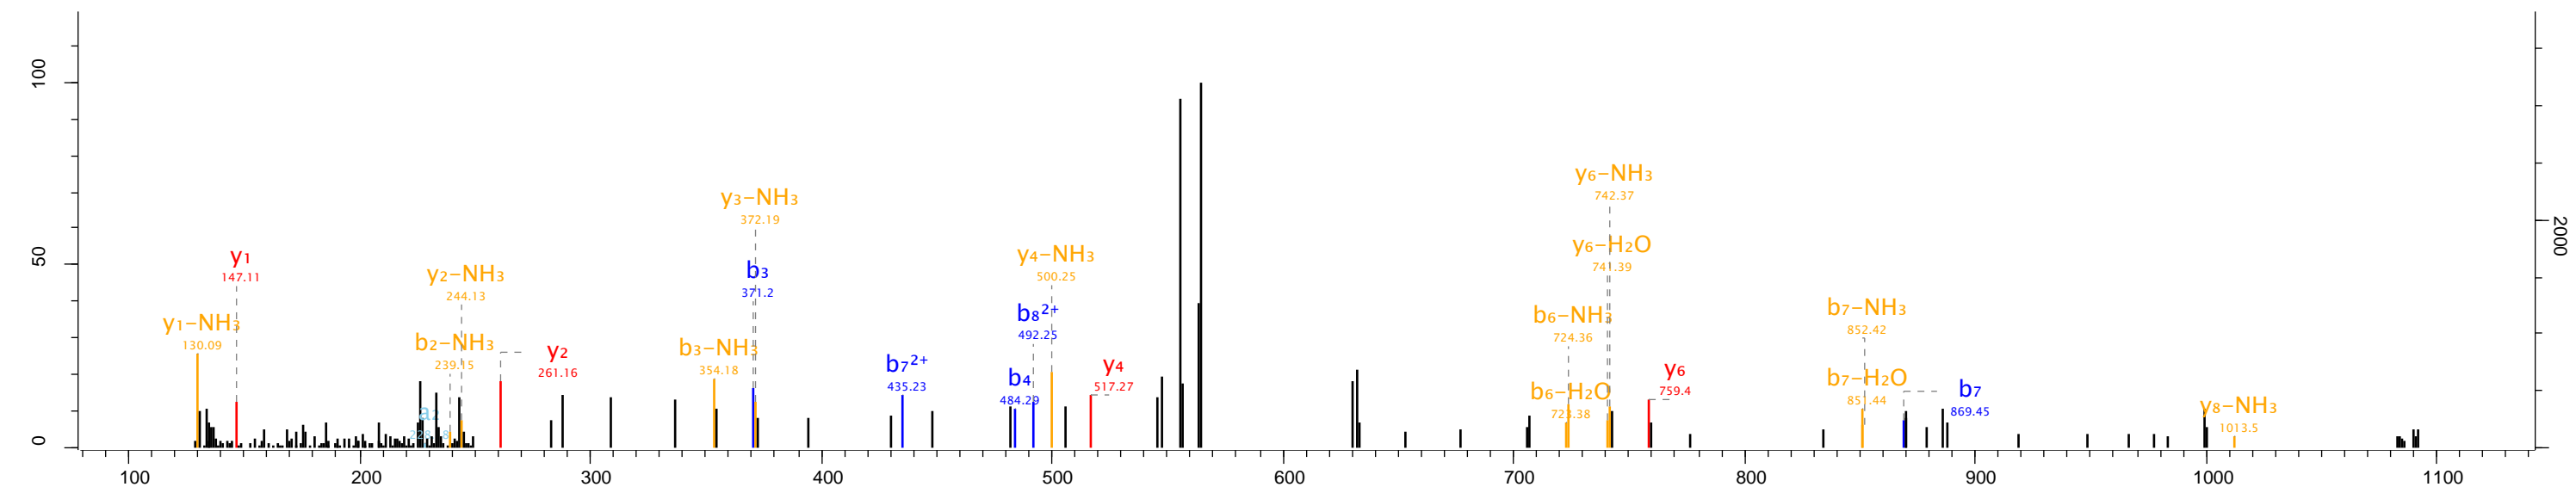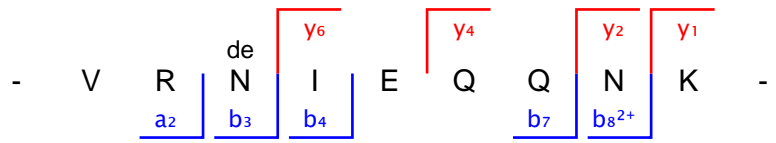

Spectral Annotation for Single-Peptide IDs between Single D11 Cells using Q-OT-LIT

Raw file 2015-01-08\_CL04\_Blastomere-15 Scan 36788 Method ITMS; HCD Score 94.41 m/z 542.77

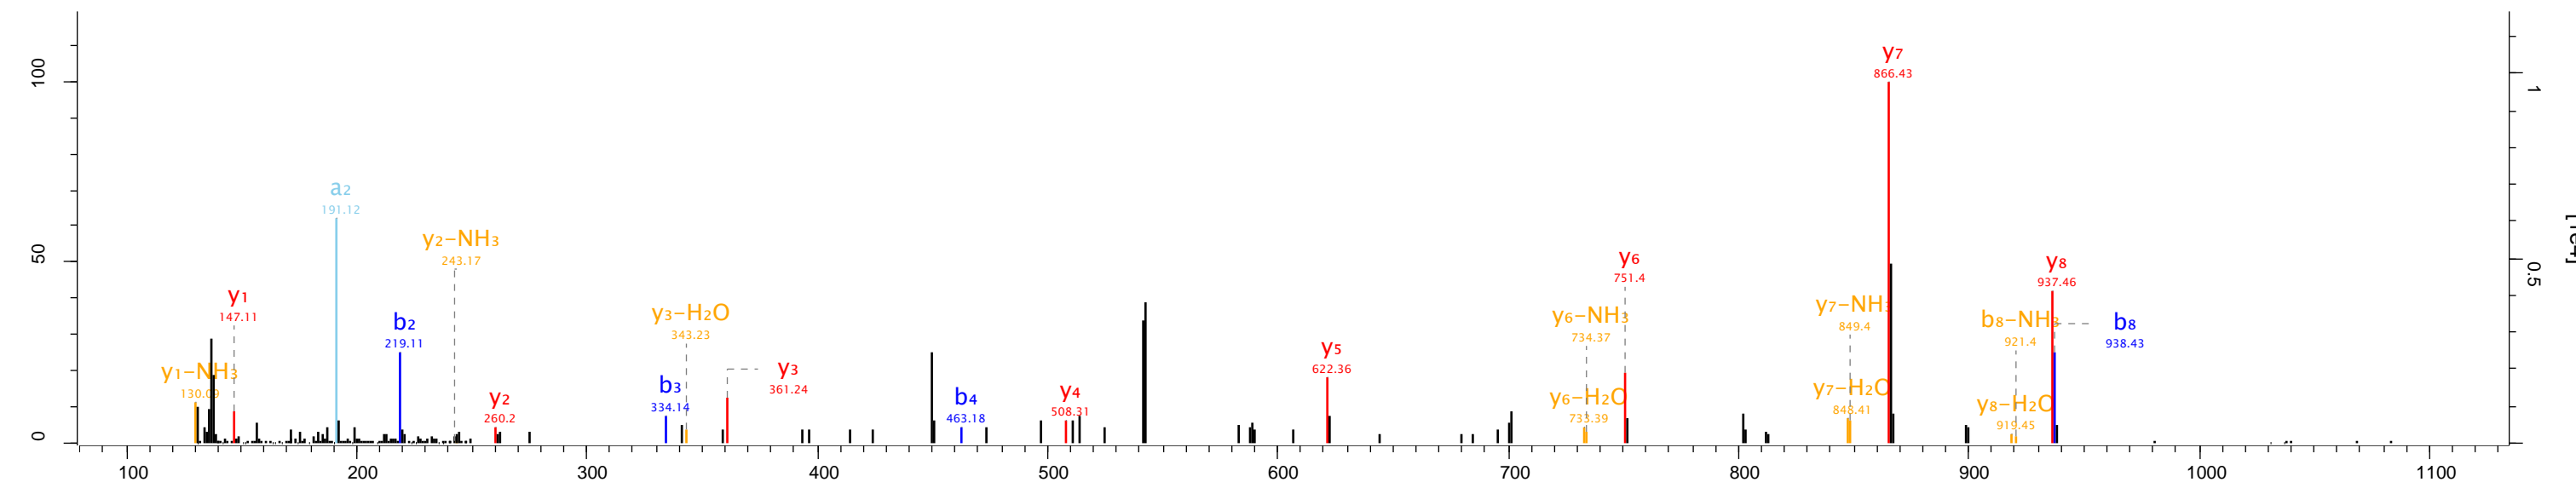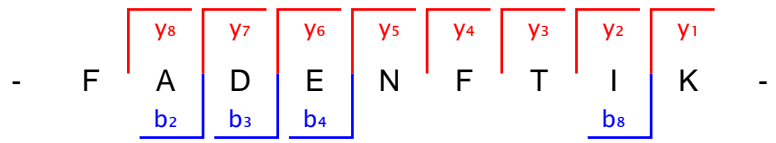

Spectral Annotation for Single-Peptide IDs between Single D11 Cells using Q-OT-LIT

Raw file 2015-01-08\_CL04\_Blastomere-15 Scan 36813 Method ITMS; HCD Score 136.99 m/z 542.77

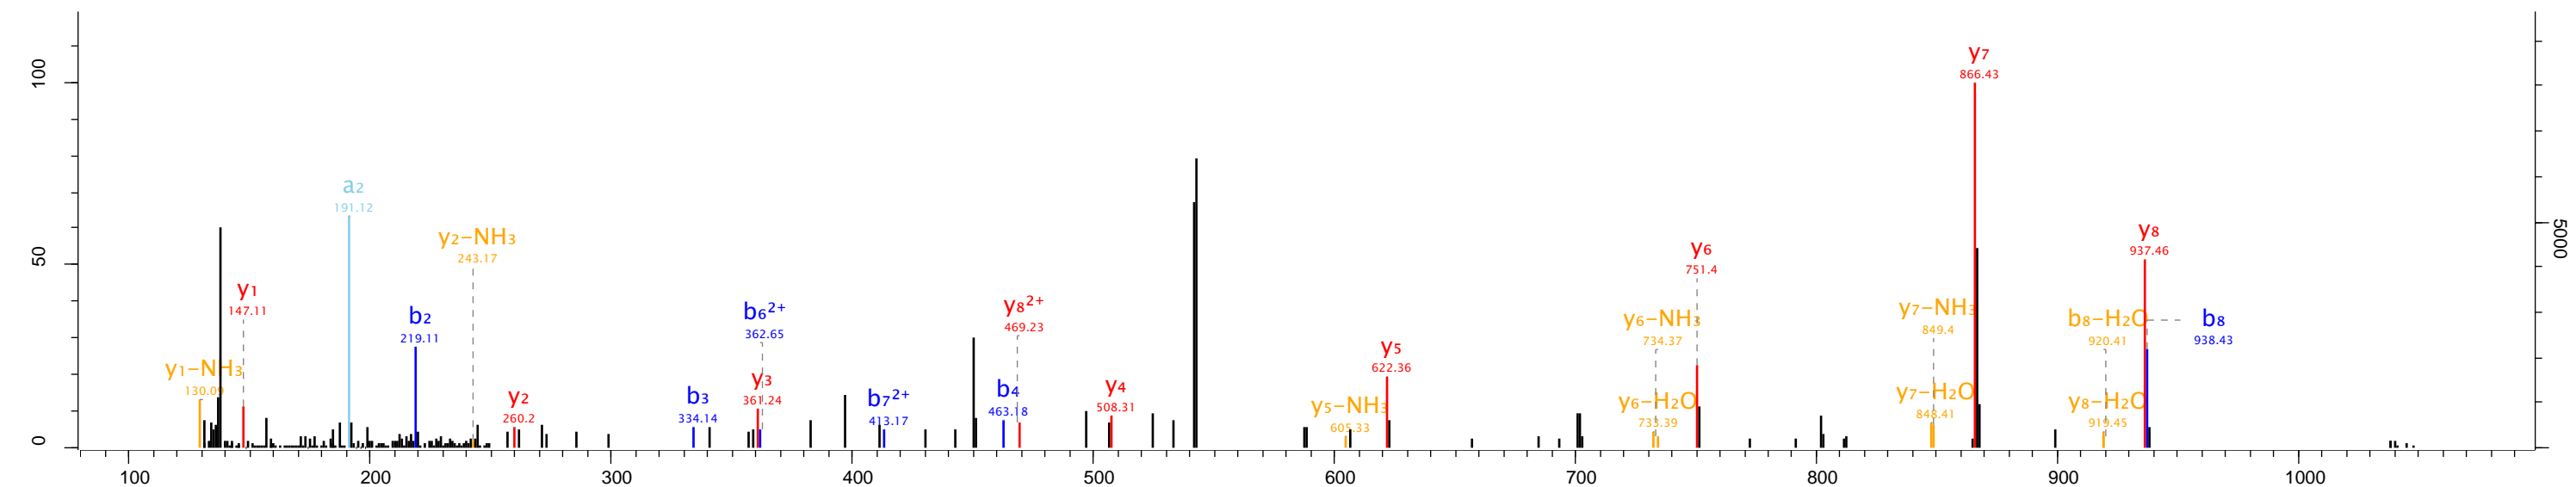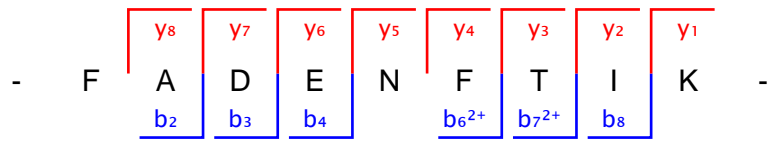

Spectral Annotation for Single-Peptide IDs between Single D11 Cells using Q-OT-LIT



Raw file 2015-01-08\_CL04\_Blastomere-15 Scan 36829 Method ITMS; HCD Score 96.67 m/z 542.77

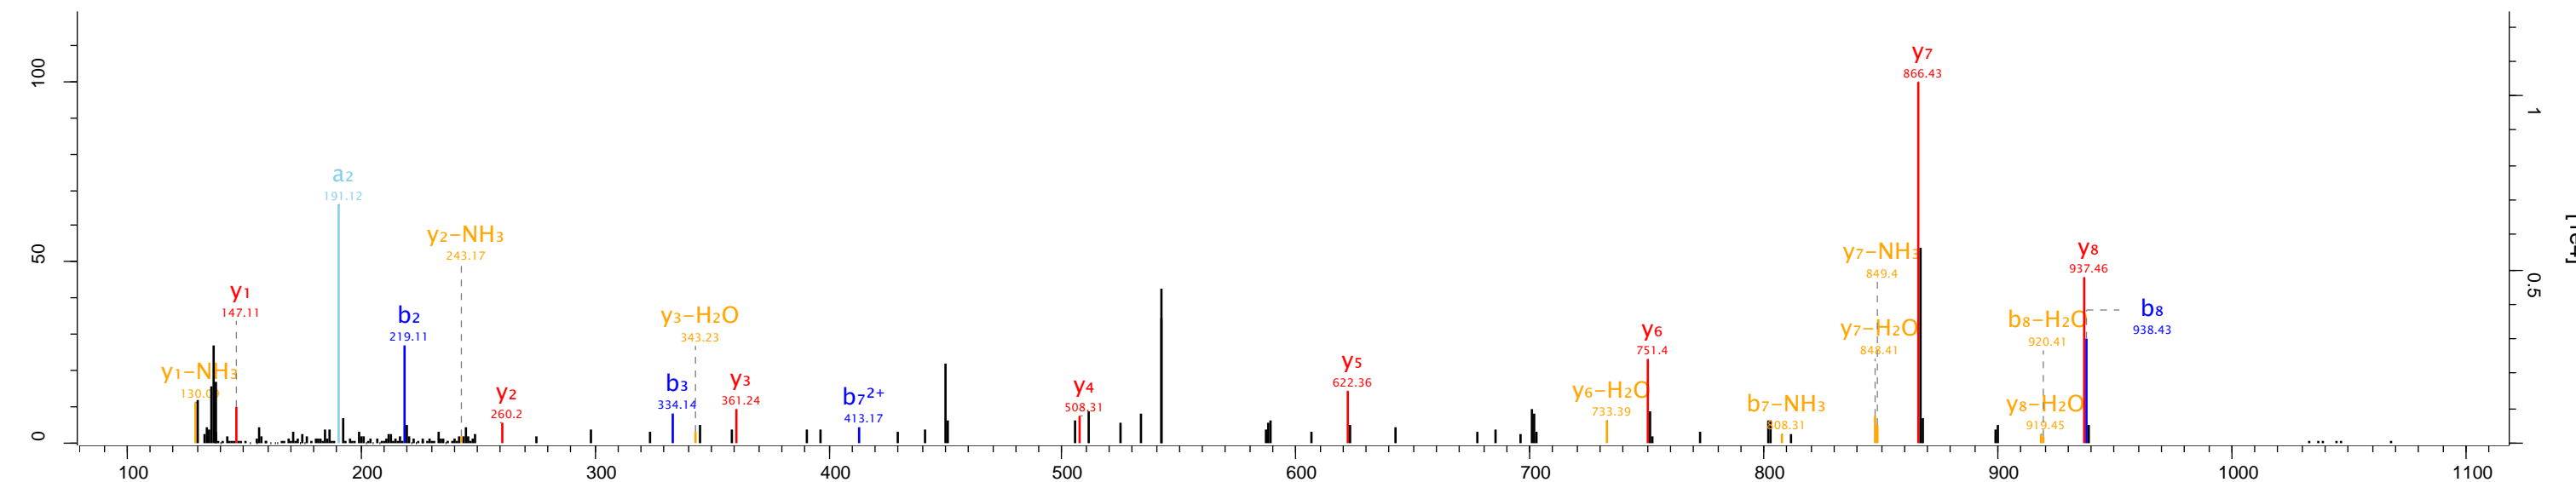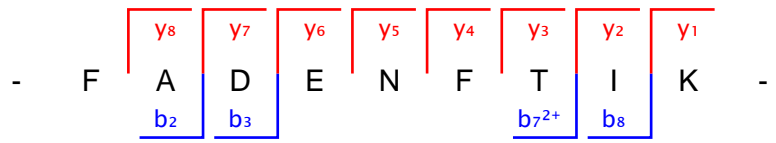

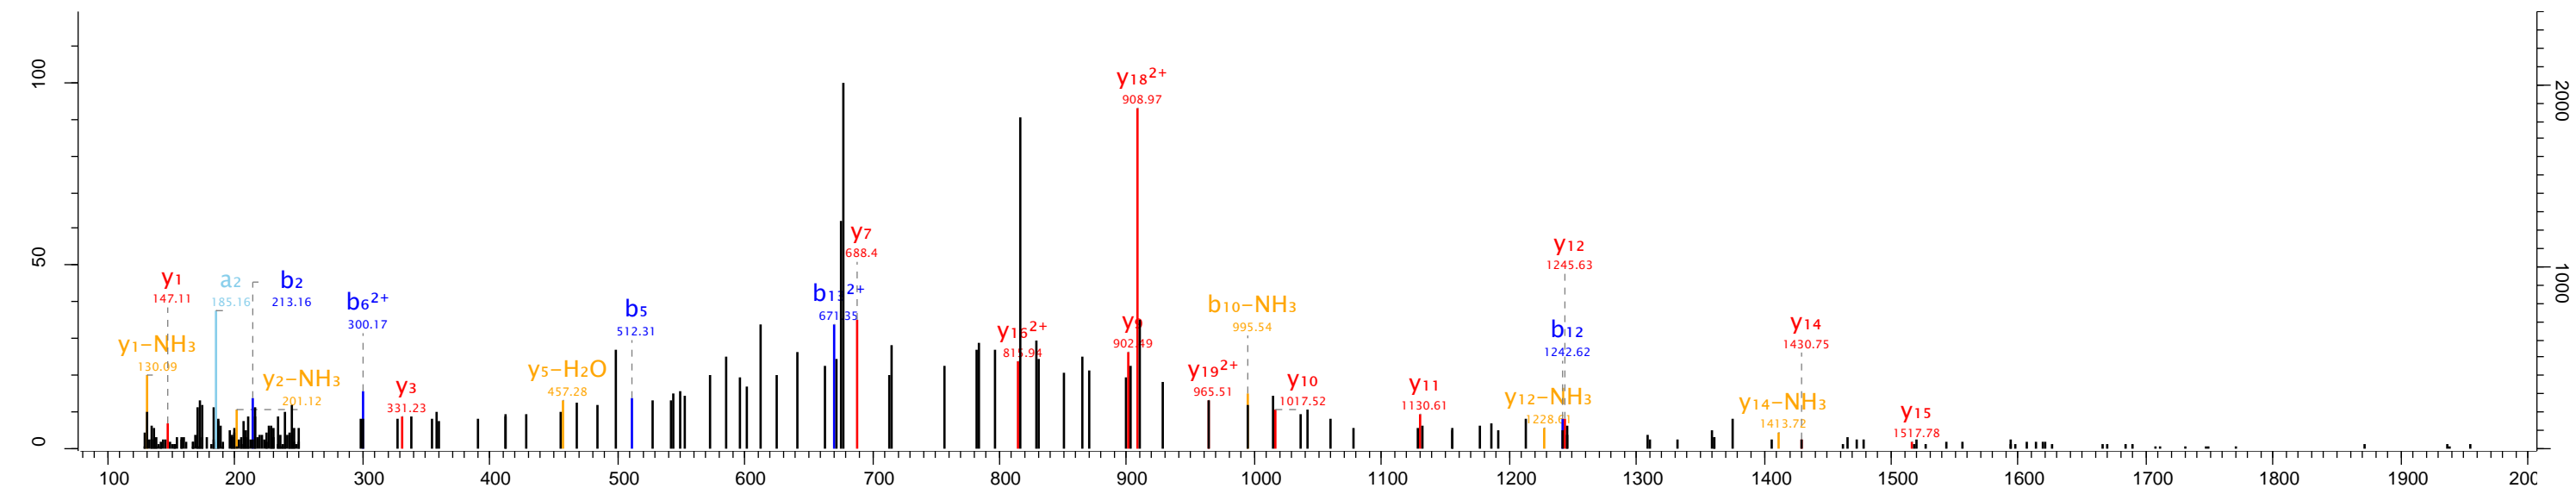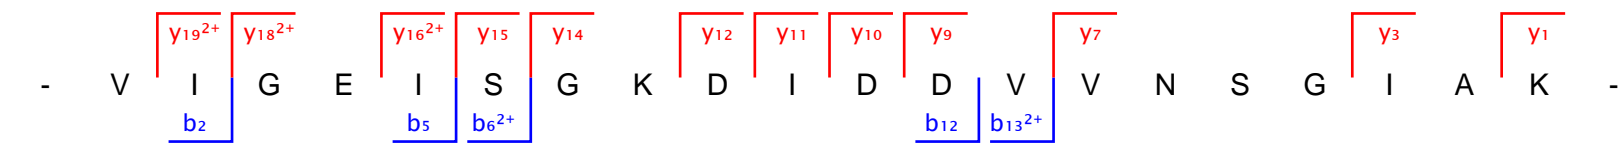

Raw file 2015-01-08\_CL04\_Blastomere-15 Scan 36857 Method ITMS; HCD Score 66.96 m/z 516.29

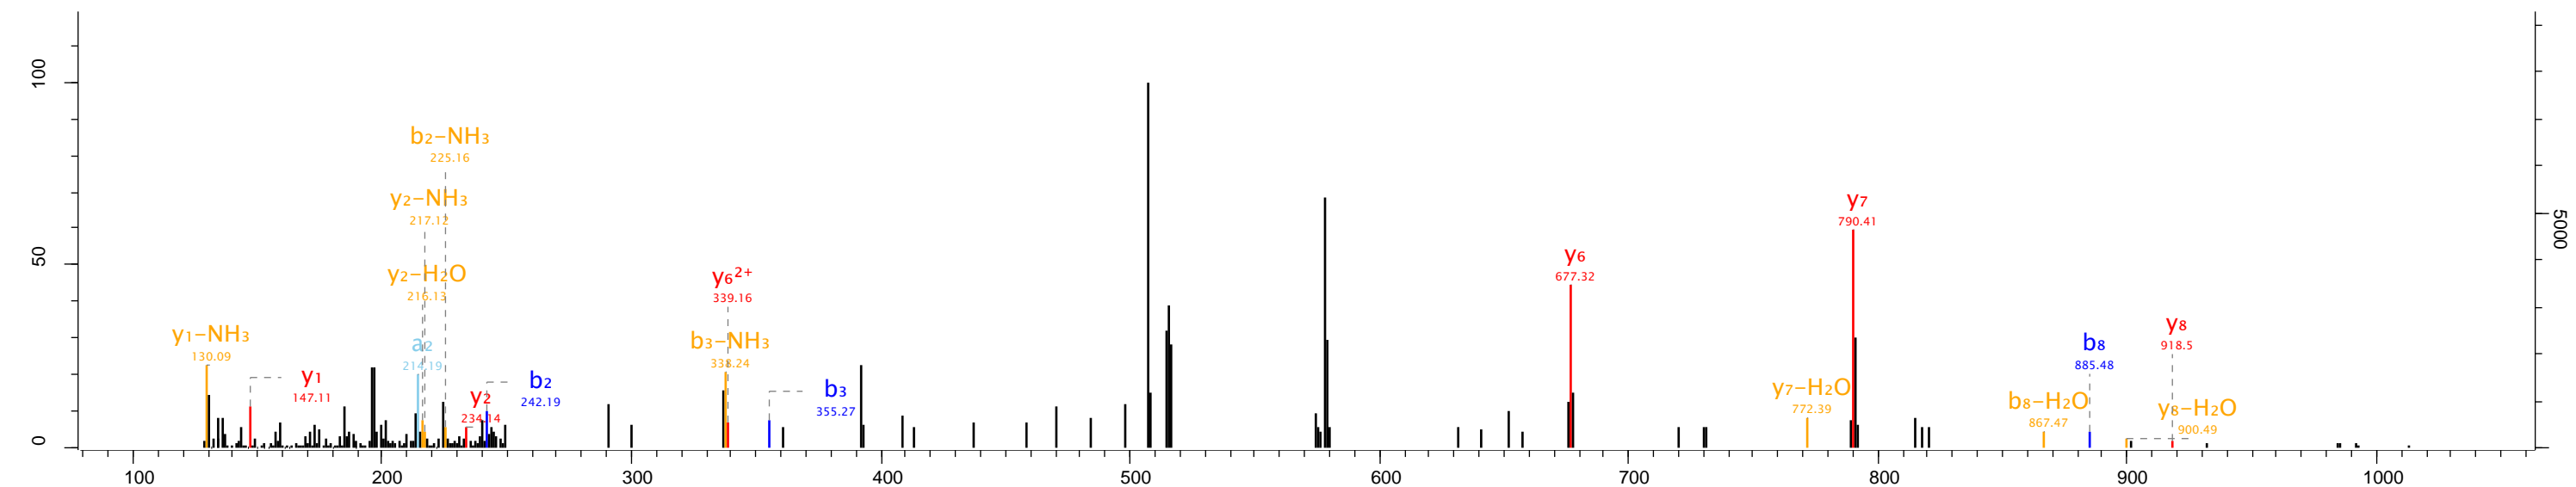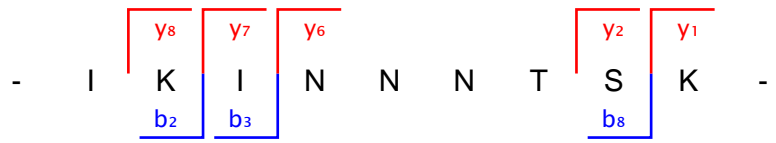

Spectral Annotation for Single-Peptide IDs between Single D11 Cells using Q-OT-LIT

Raw file 2015-01-08\_CL04\_Blastomere-15 Scan 36917 Method ITMS; HCD Score 63.53 m/z 565.76

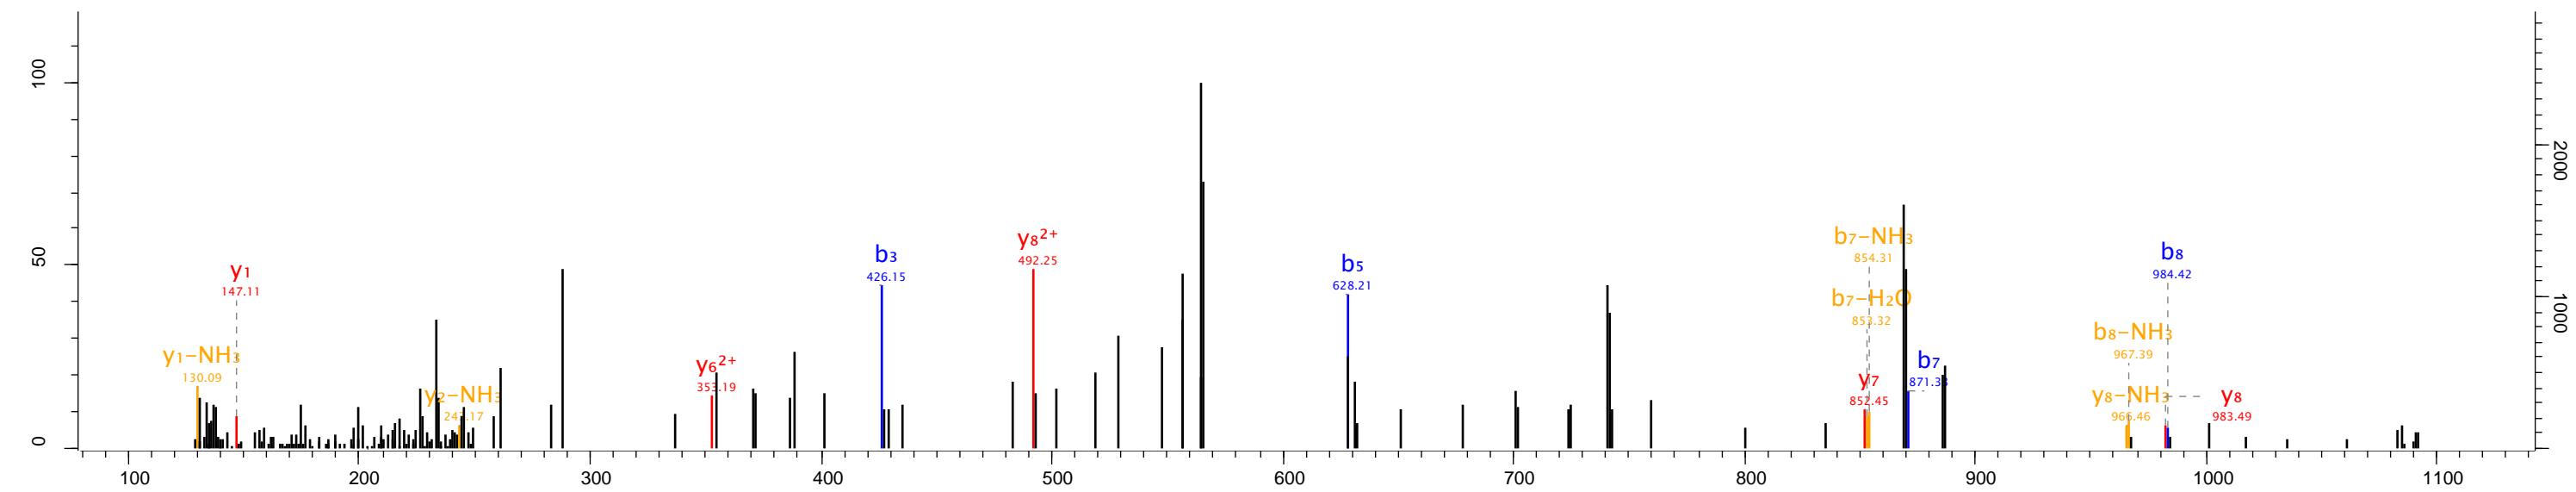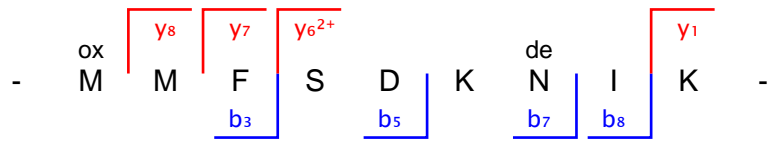

Spectral Annotation for Single-Peptide IDs between Single D11 Cells using Q-OT-LIT

Raw file 2015-01-08\_CL04\_Blastomere-15 Scan 36926 Method ITMS; HCD Score 87.35 m/z 677.36

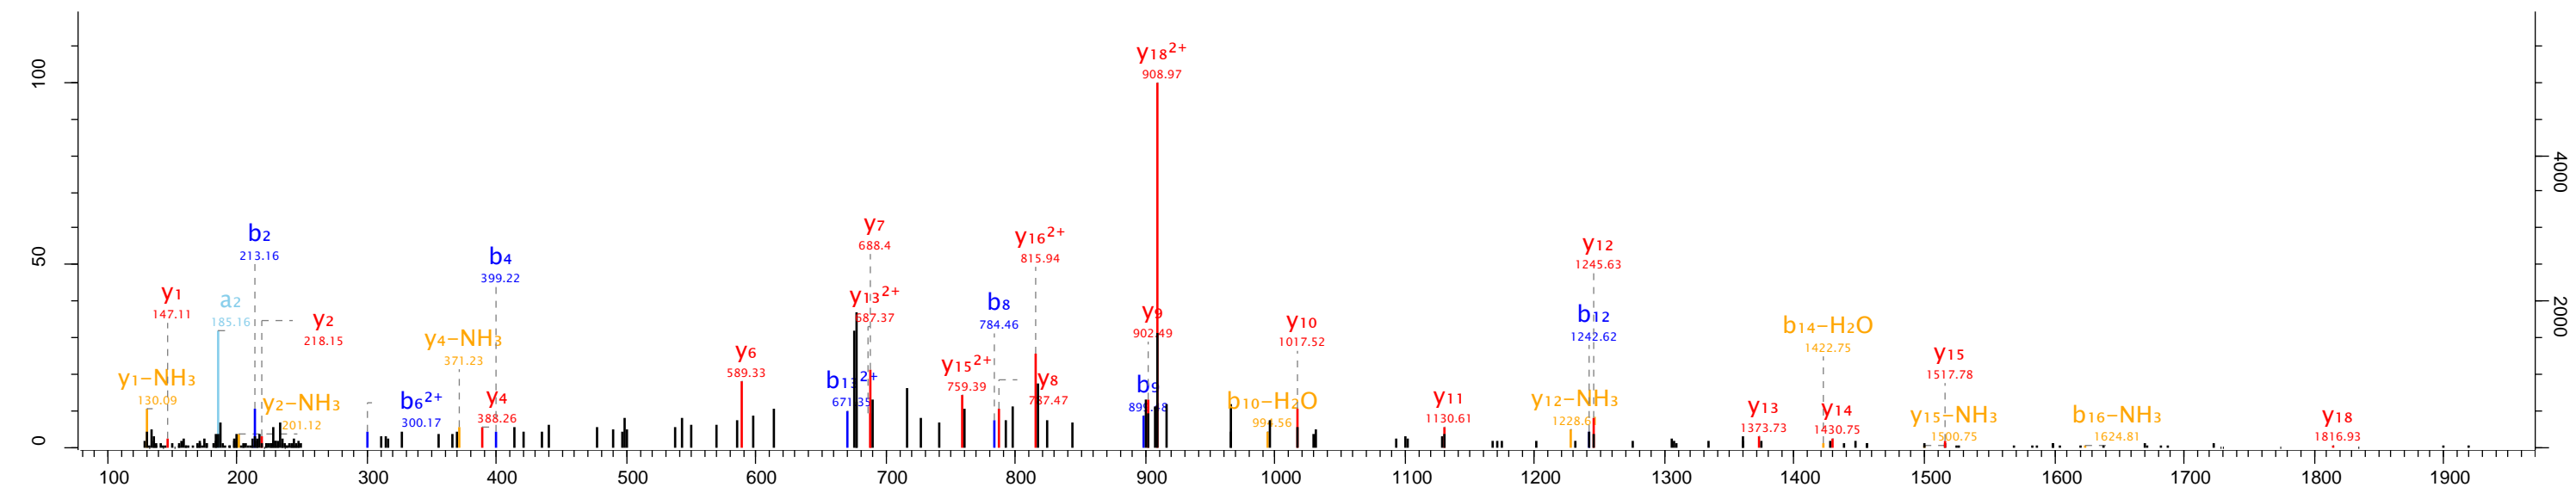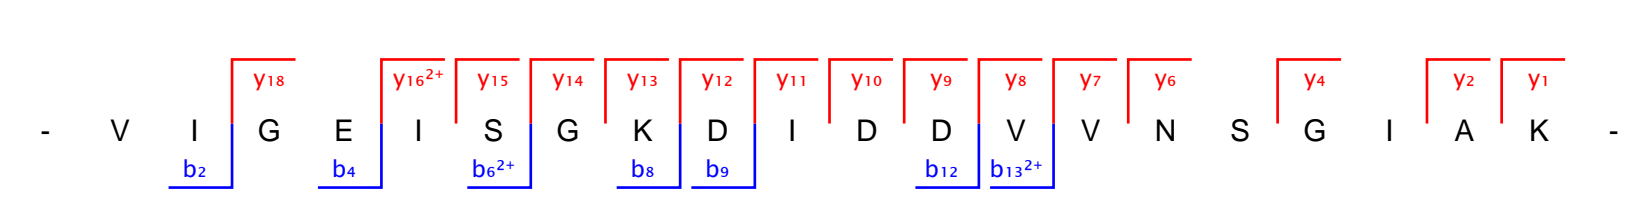

Spectral Annotation for Single-Peptide IDs between Single D11 Cells using Q-OT-LIT

Raw file 2015-01-08\_CL04\_Blastomere-15 Scan 36955 Method ITMS; HCD Score 111.65 m/z 677.36

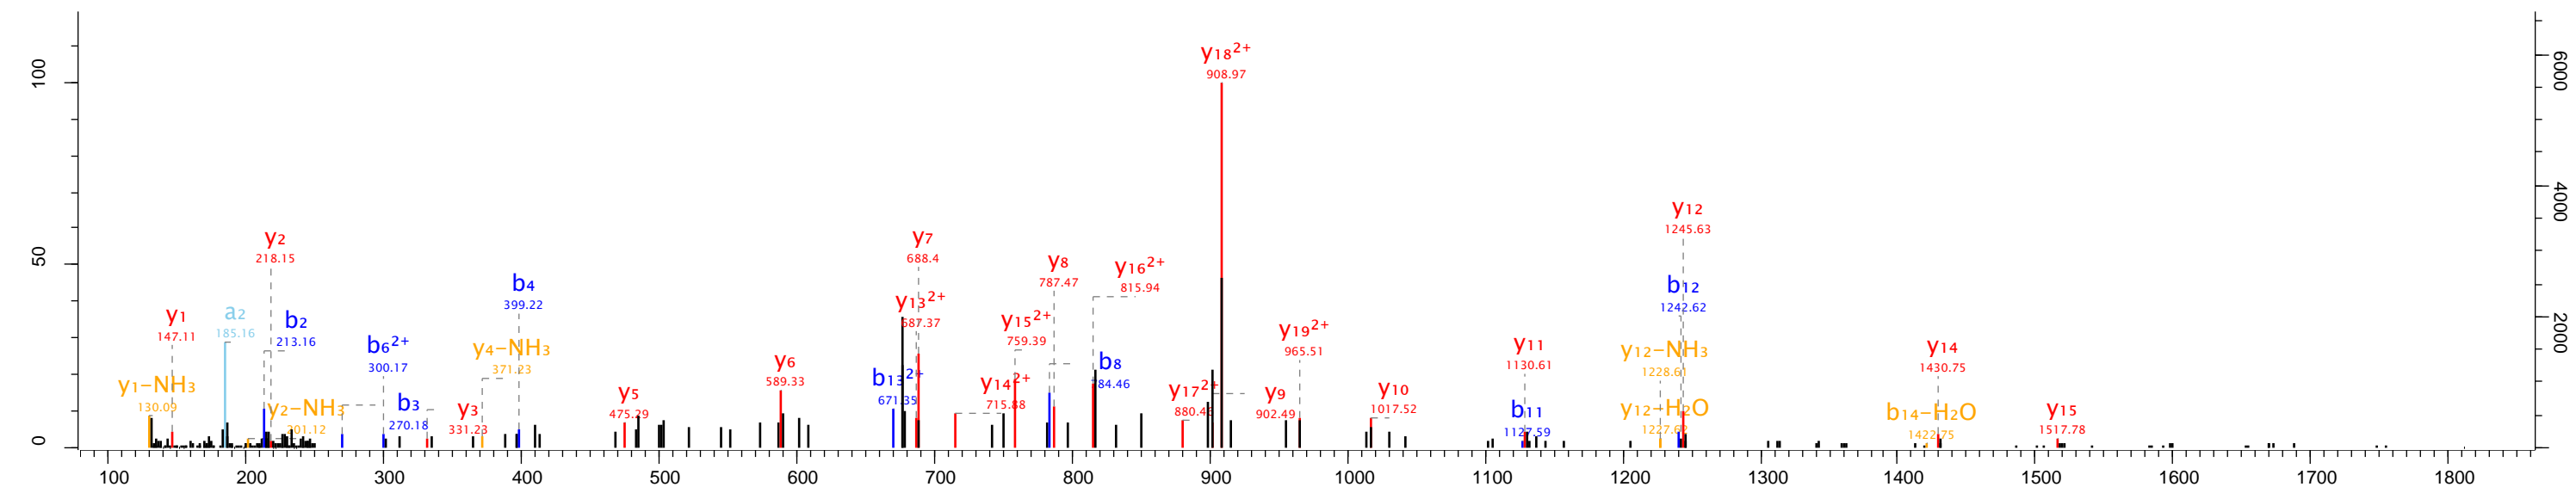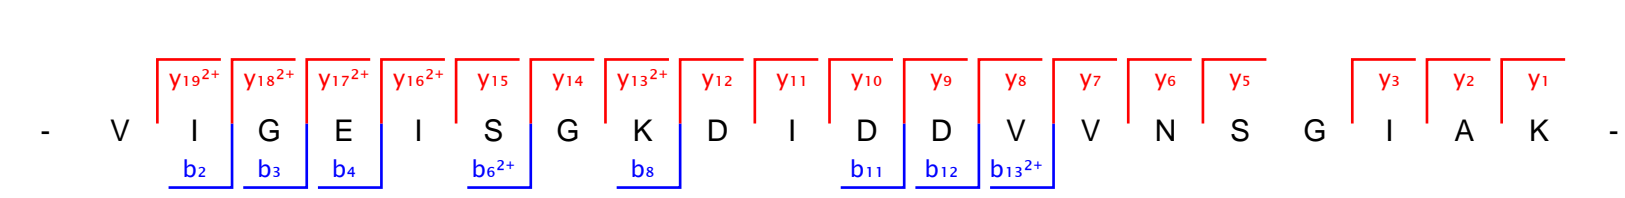

Spectral Annotation for Single-Peptide IDs between Single D11 Cells using Q-OT-LIT

Raw file 2015-01-08\_CL04\_Blastomere-15 Scan 36973 Method ITMS; HCD Score 100.07 m/z 677.03

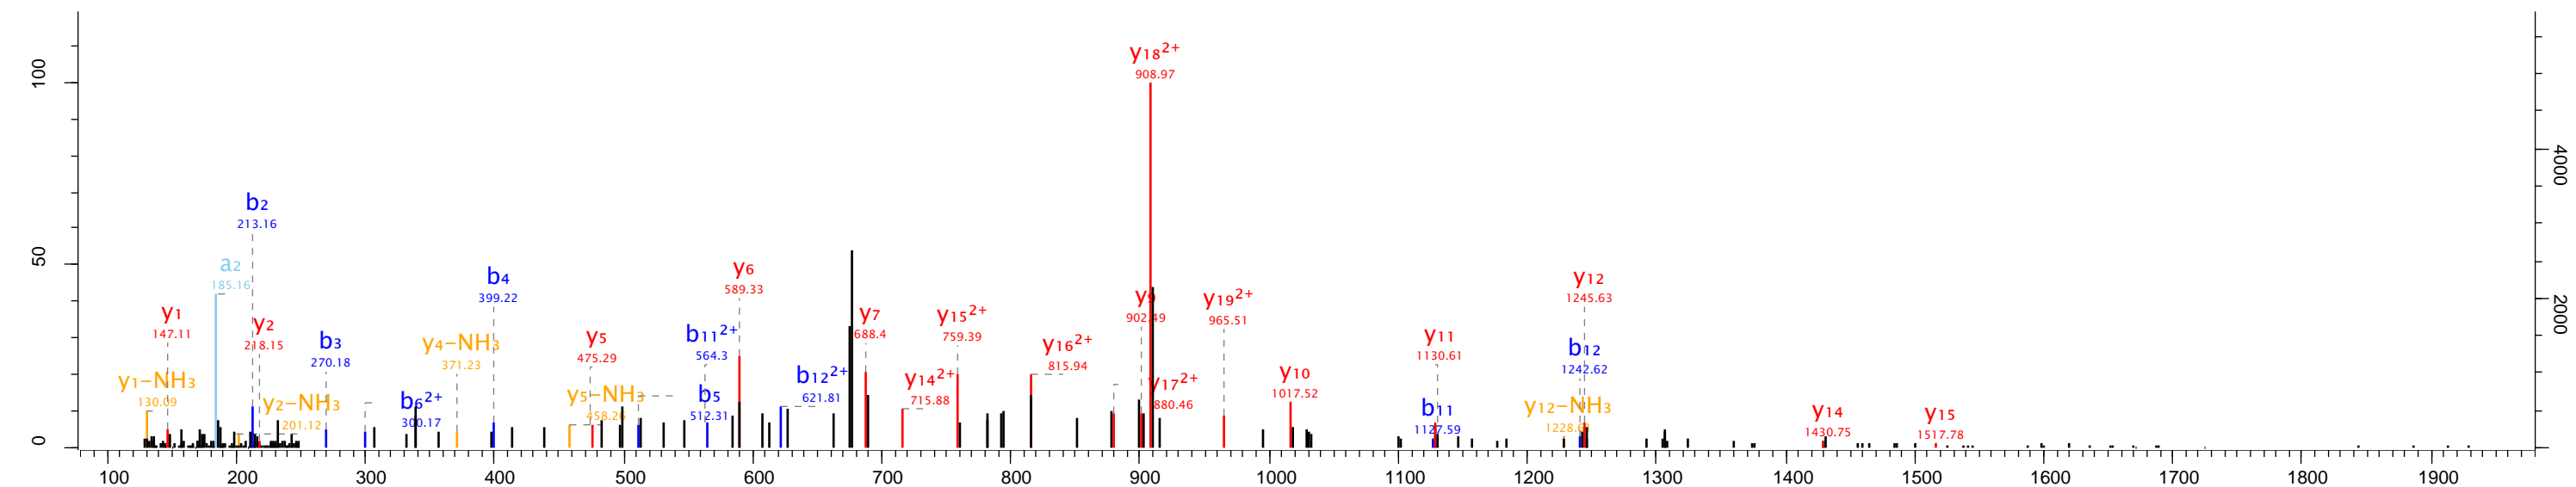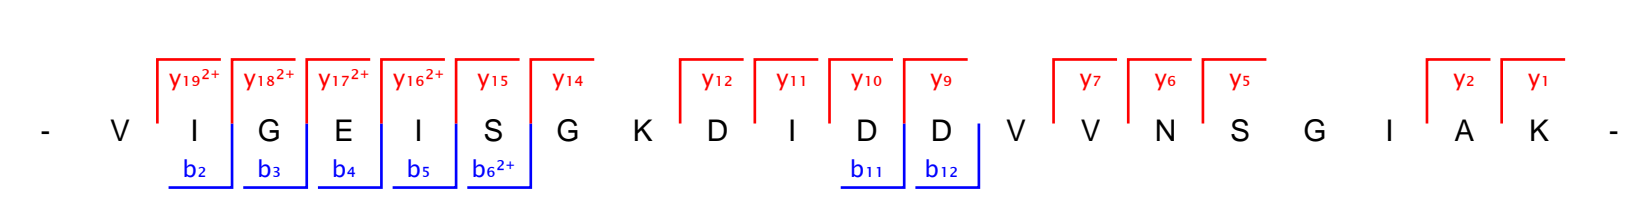

Spectral Annotation for Single-Peptide IDs between Single D11 Cells using Q-OT-LIT

Raw file 2015-01-08\_CL04\_Blastomere-15 Scan 36976 Method ITMS; HCD Score 53.5 m/z 643.33

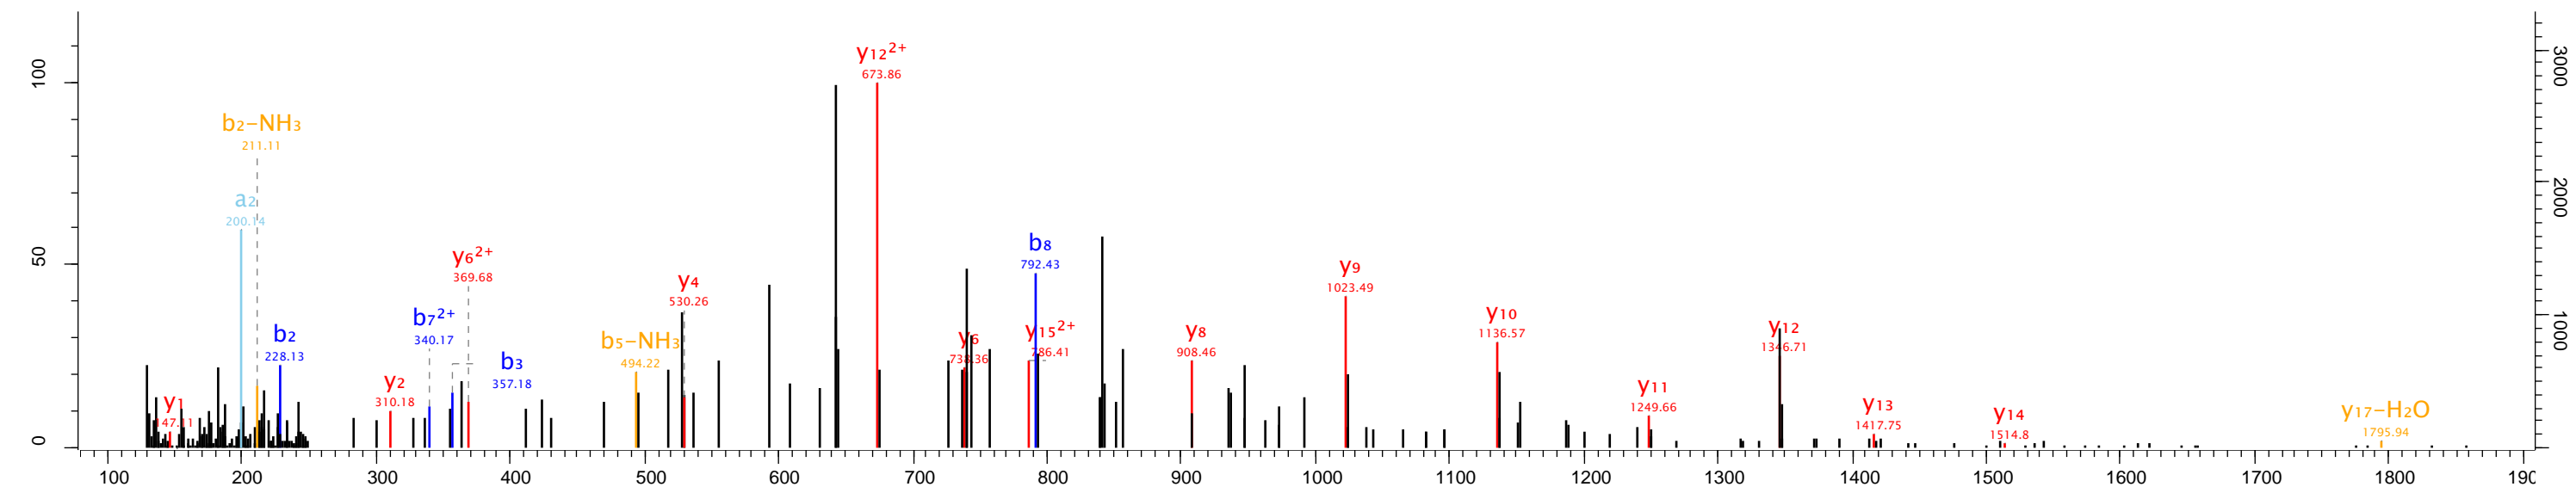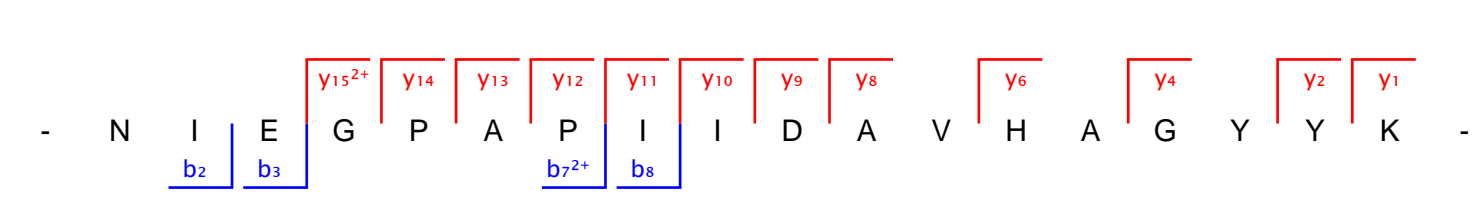

Spectral Annotation for Single-Peptide IDs between Single D11 Cells using Q-OT-LIT



Raw file 2015-01-08\_CL04\_Blastomere-15 Scan 36984 Method ITMS; HCD Score 66.78 m/z 706.69

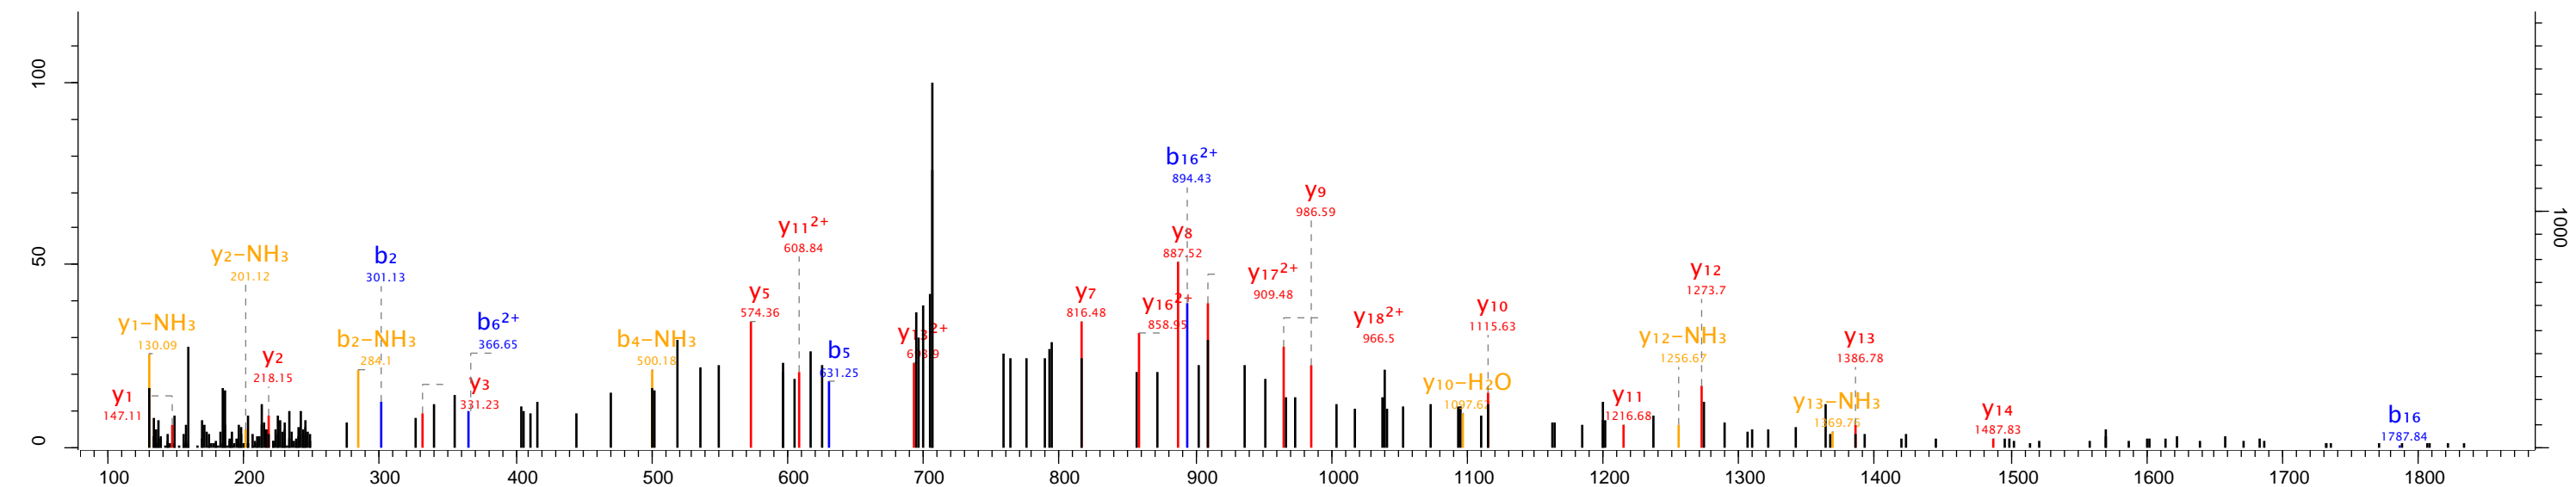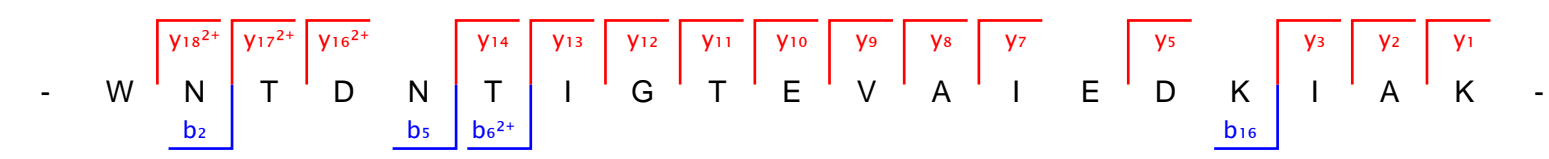

Spectral Annotation for Single-Peptide IDs between Single D11 Cells using Q-OT-LIT

Raw file 2015-01-08\_CL04\_Blastomere-15 Scan 36997 Method ITMS; HCD Score 60.95 m/z 643.67

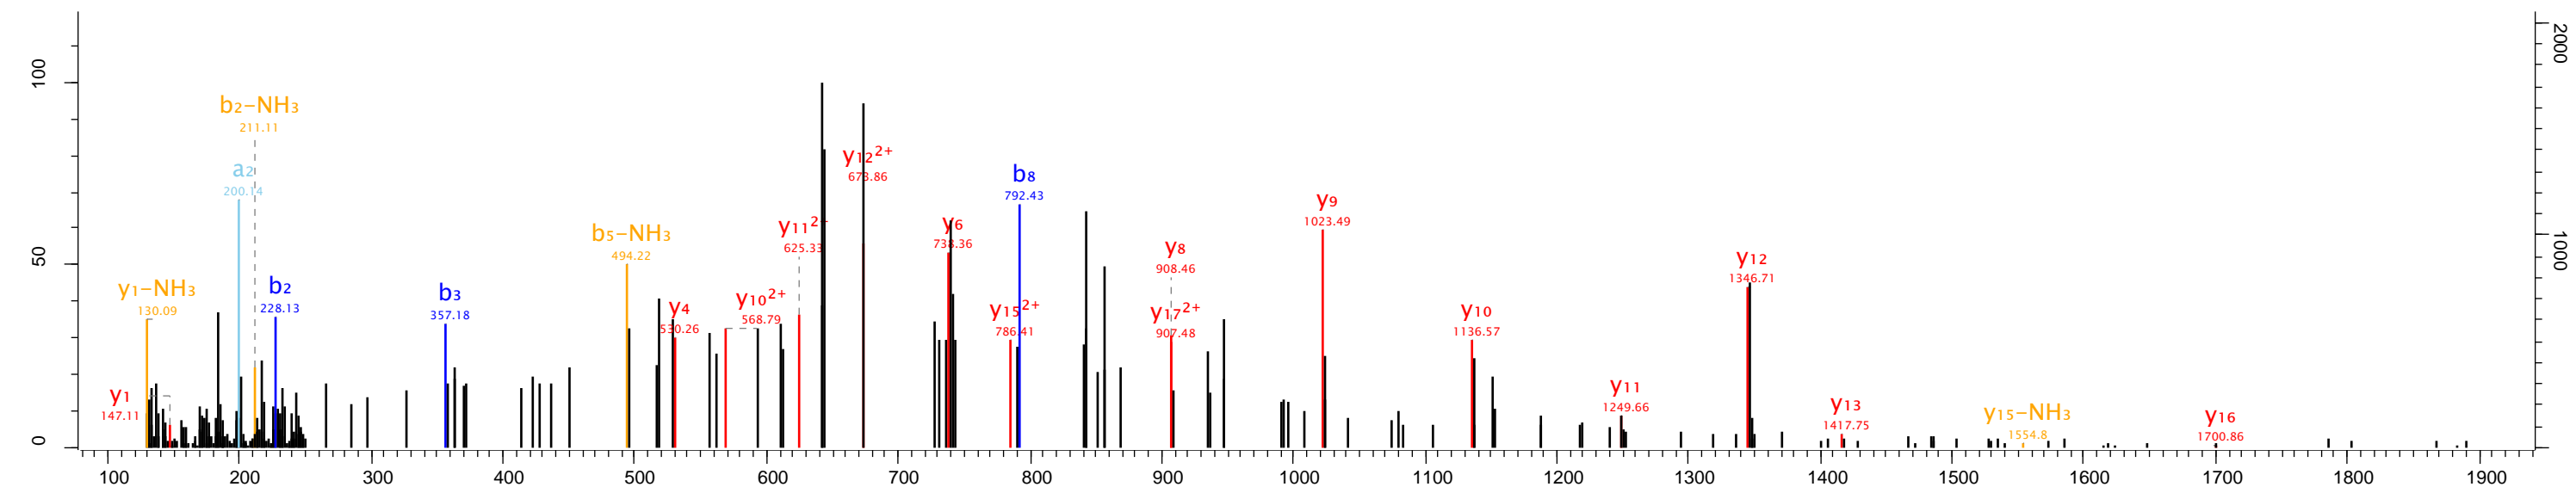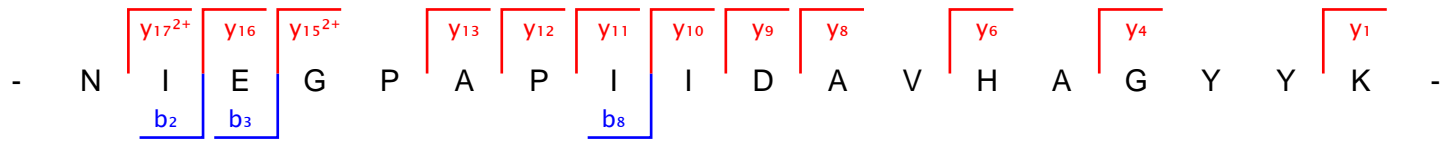

Spectral Annotation for Single-Peptide IDs between Single D11 Cells using Q-OT-LIT

Raw file 2015-01-08\_CL04\_Blastomere-15 Scan 37024 Method ITMS; HCD Score 73.5 m/z 643.67

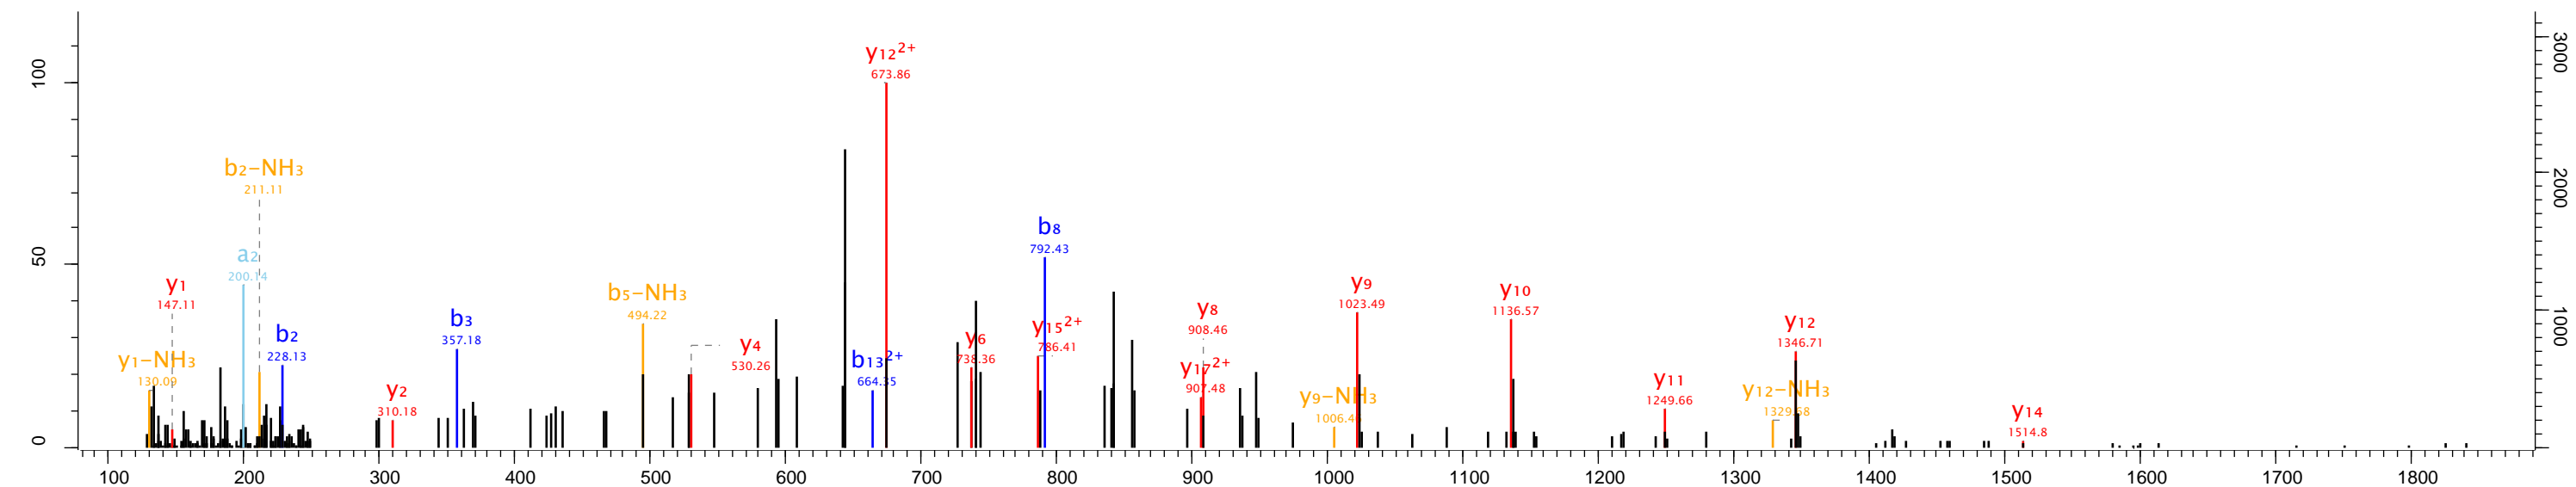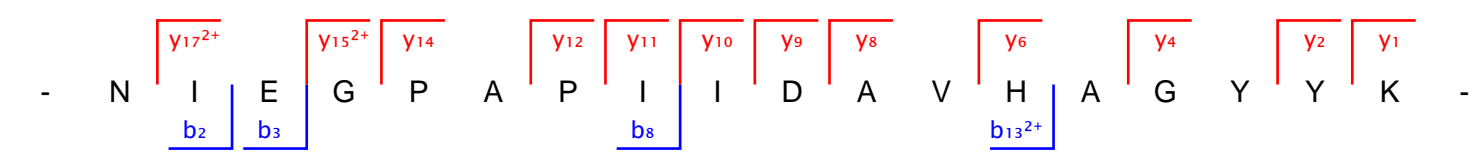

Spectral Annotation for Single-Peptide IDs between Single D11 Cells using Q-OT-LIT

Raw file 2015-01-08\_CL04\_Blastomere-15 Scan 37061 Method ITMS; HCD Score 64.89 m/z 643.67

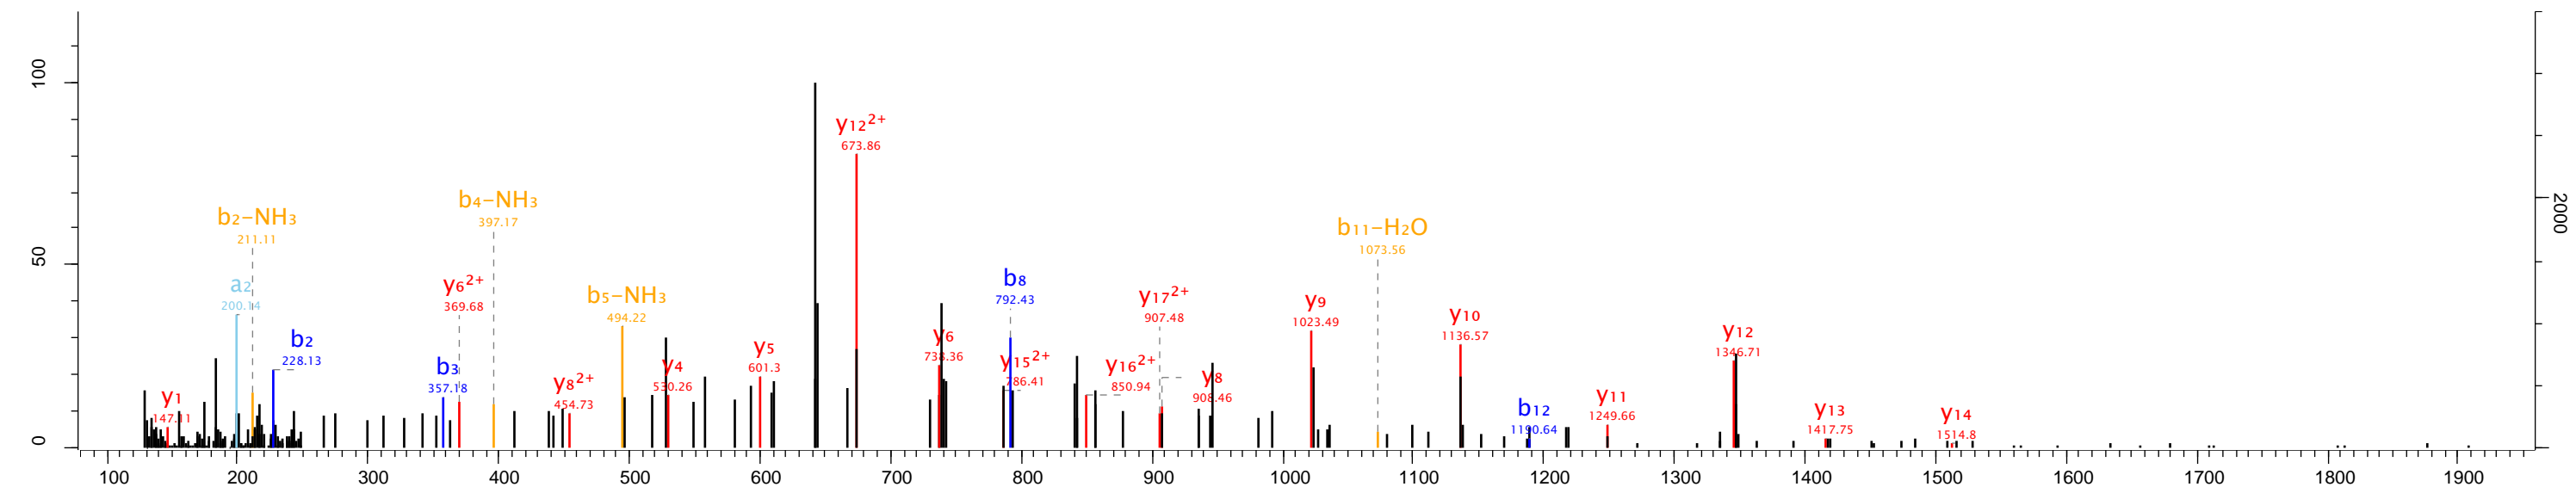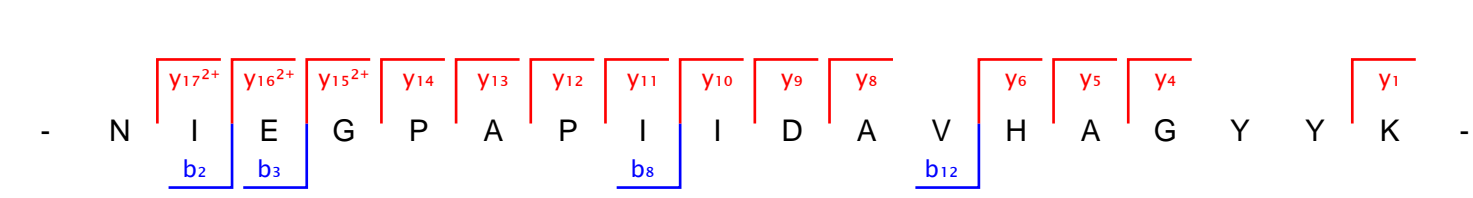

Spectral Annotation for Single-Peptide IDs between Single D11 Cells using Q-OT-LIT

Raw file 2015-01-08\_CL04\_Blastomere-15 Scan 37085 Method ITMS; HCD Score 78.34 m/z 513.31

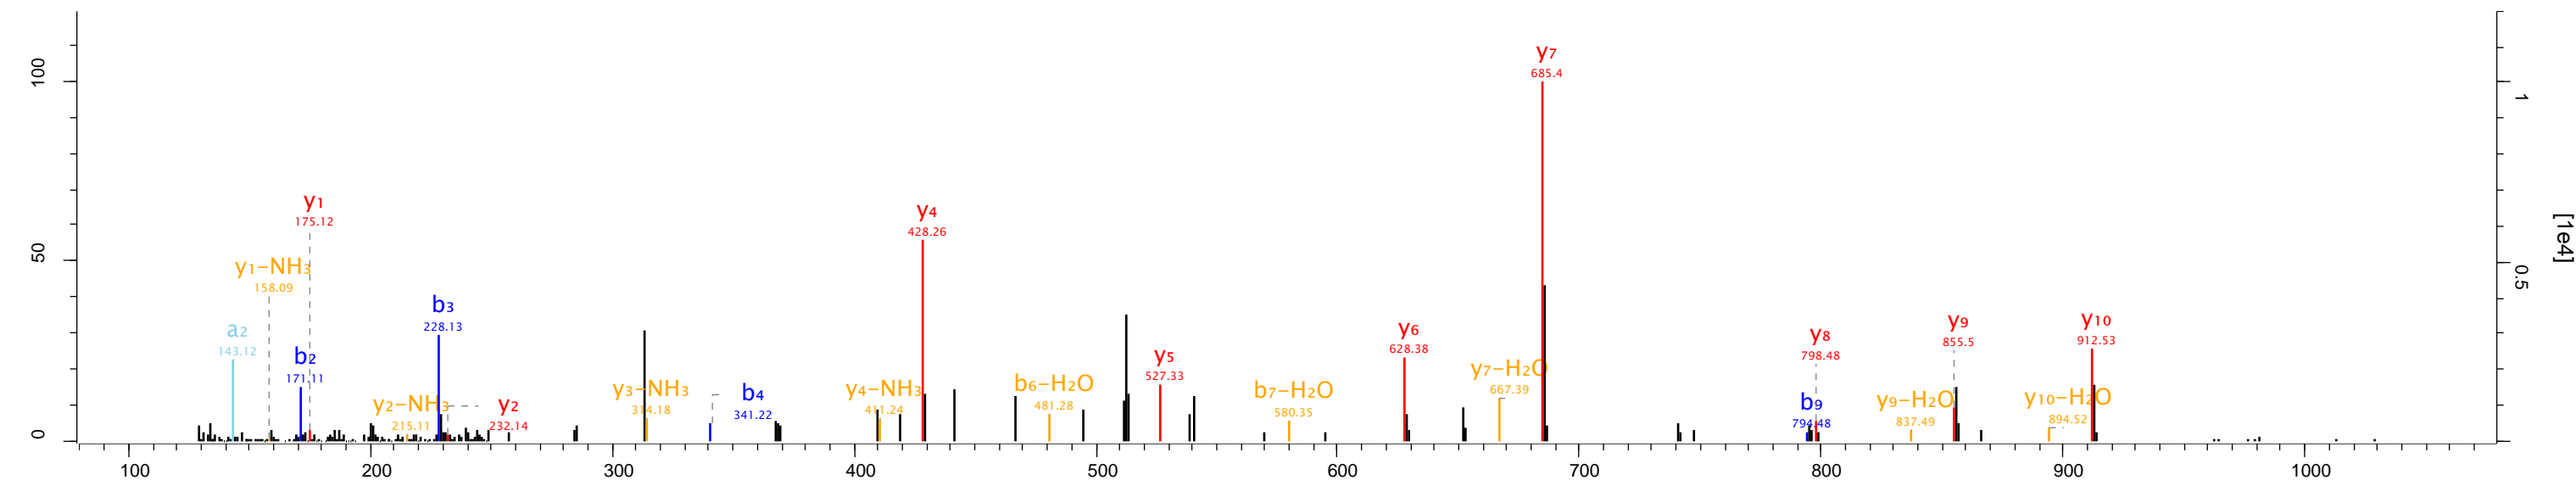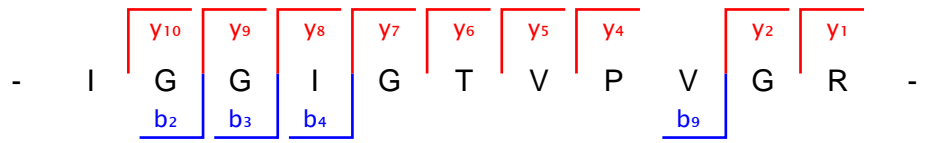

Raw file 2015-01-08\_CL04\_Blastomere-15 Scan 37119 Method ITMS; HCD Score 97.81 m/z 513.31

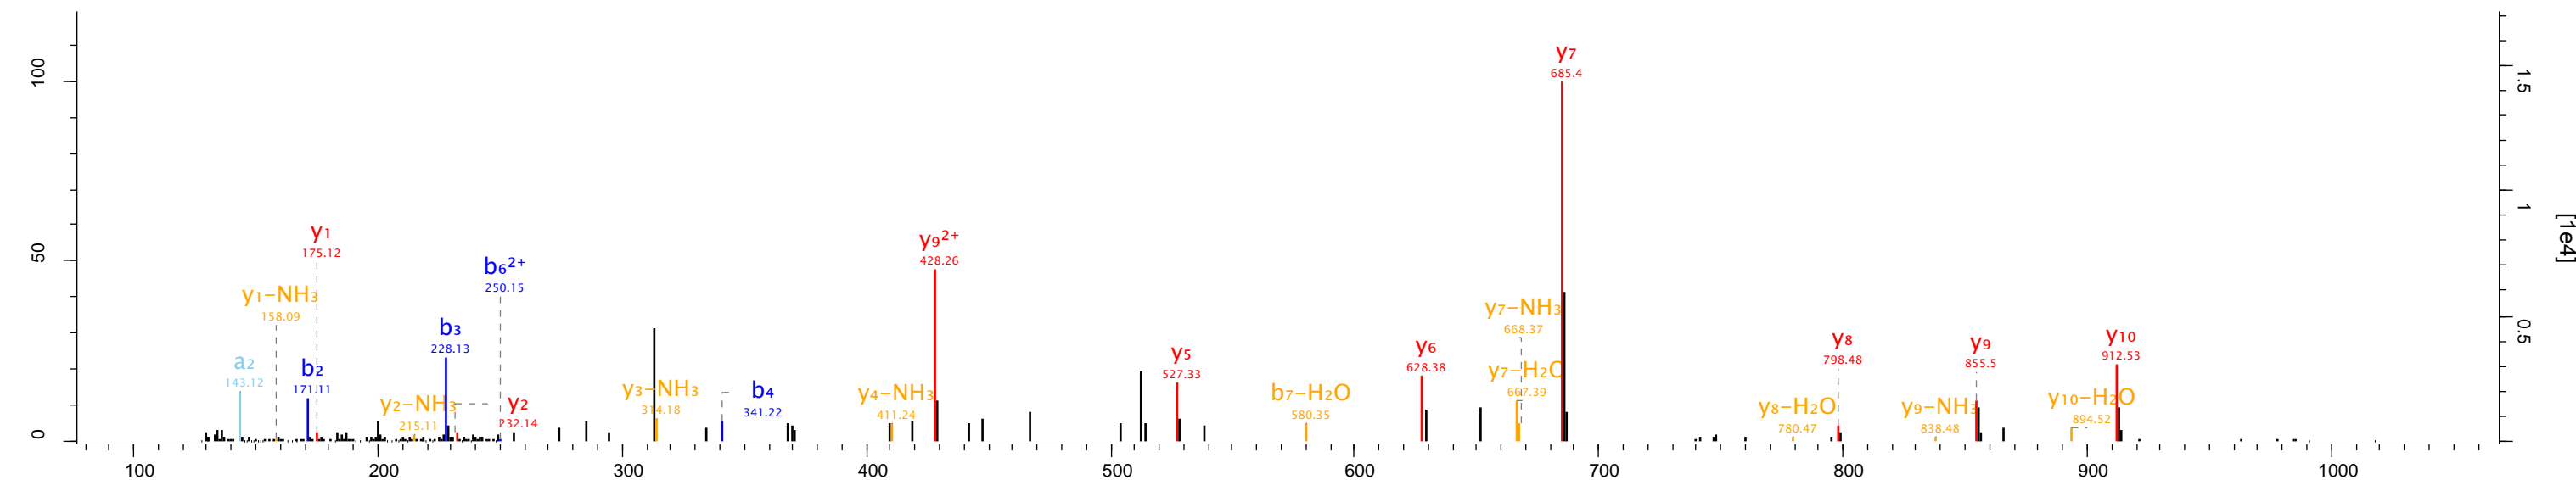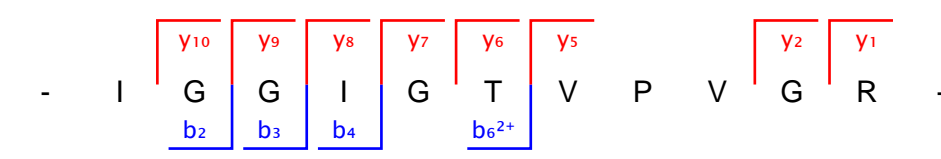

Spectral Annotation for Single-Peptide IDs between Single D11 Cells using Q-OT-LIT

Raw file 2015-01-08\_CL04\_Blastomere-15 Scan 37141 Method ITMS; HCD Score 86.19 m/z 513.3

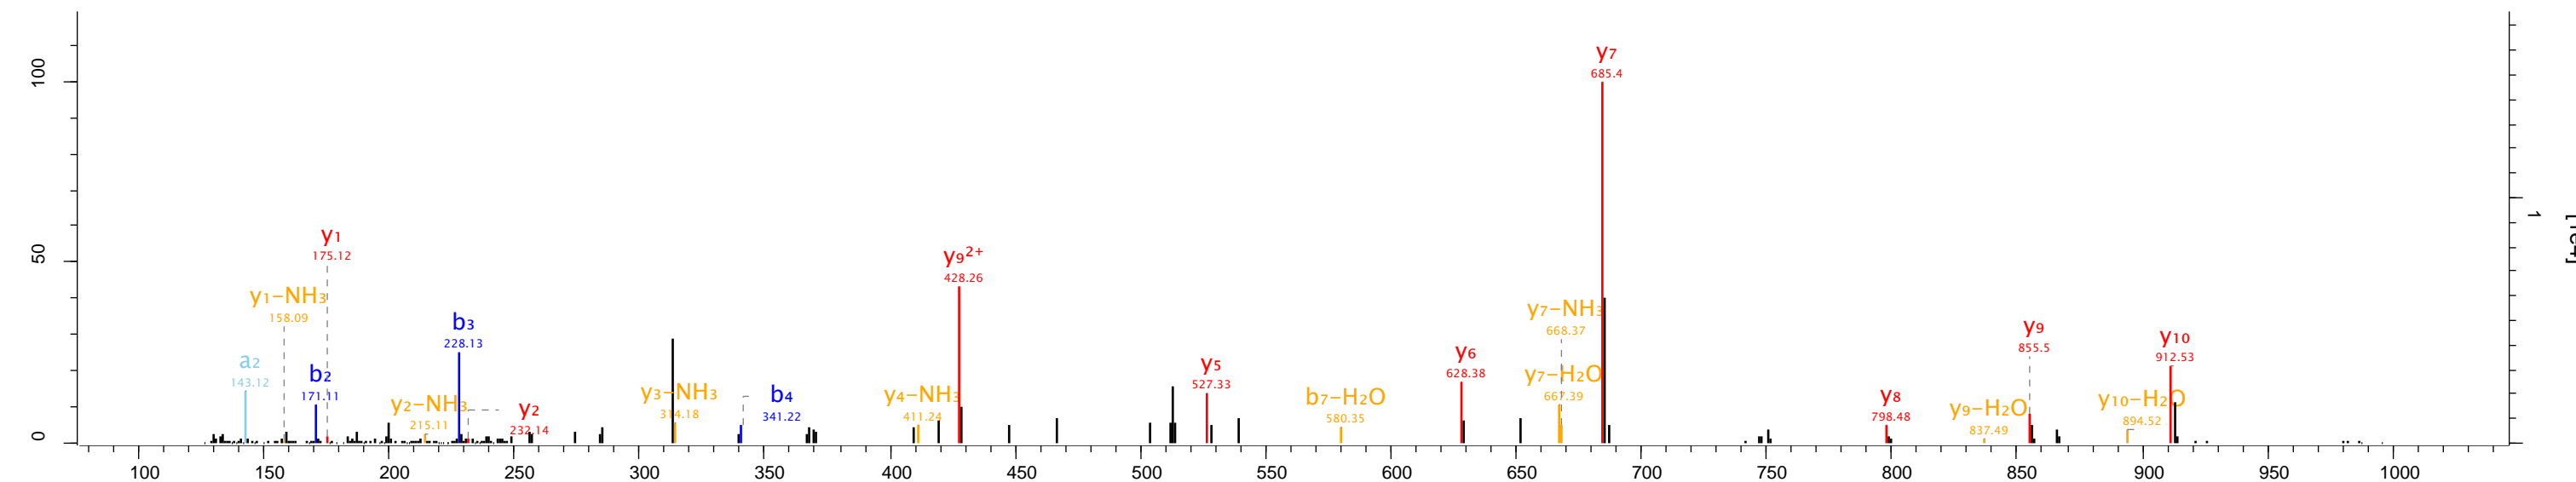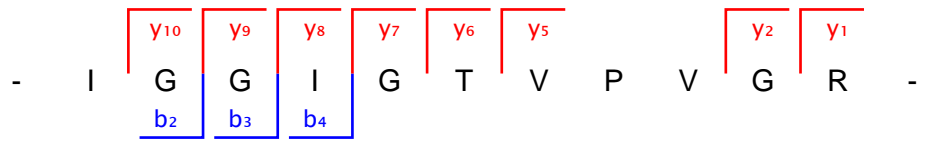

Spectral Annotation for Single-Peptide IDs between Single D11 Cells using Q-OT-LIT

Raw file 2015-01-08\_CL04\_Blastomere-15 Scan 37175 Method ITMS; HCD Score 93.6 m/z 518.77

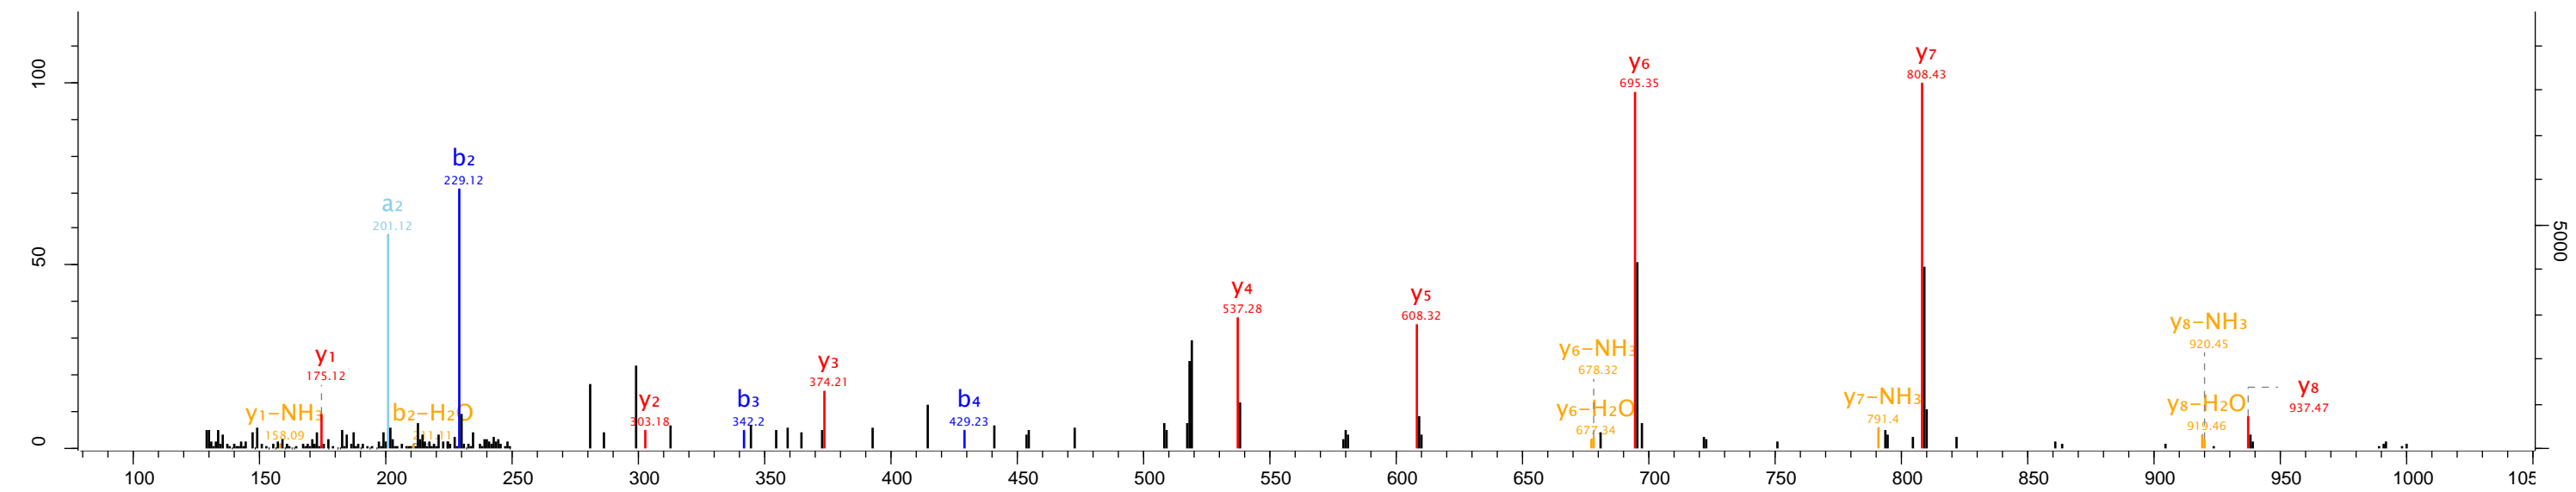



Raw file: 2015-01-08\_CL04\_Blastomere-15  
 Scan: 37176 Method: ITMS; HCD Score: 81.53 m/z: 516.3

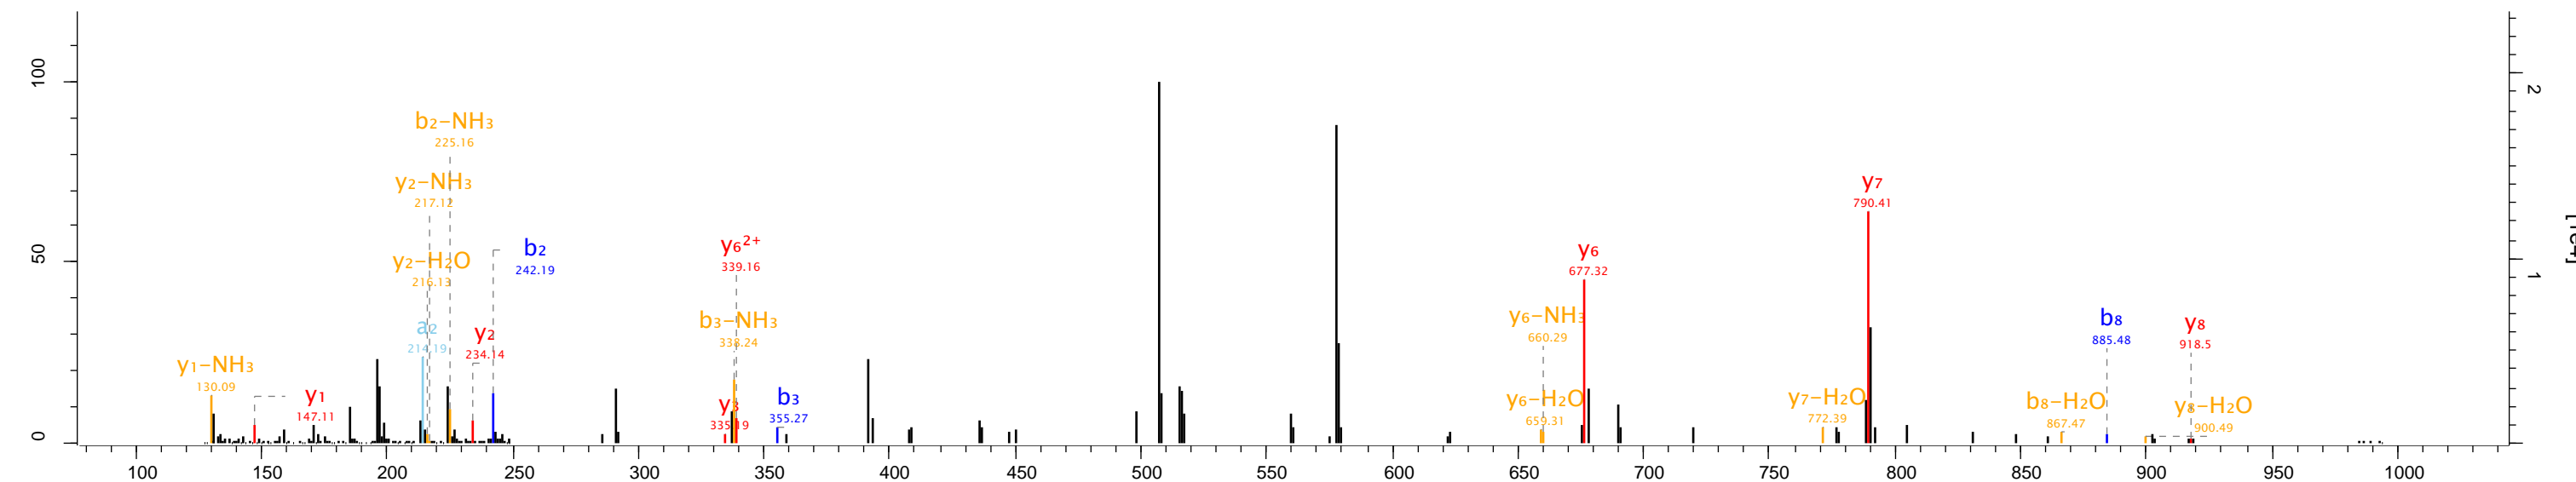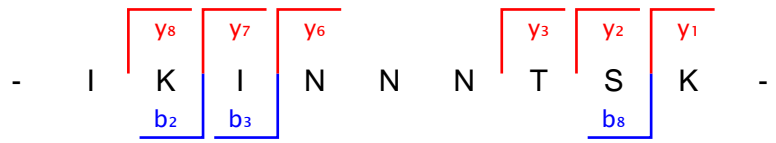

Spectral Annotation for Single-Peptide IDs between Single D11 Cells using Q-OT-LIT

Raw file 2015-01-08\_CL04\_Blastomere-15 Scan 37205 Method ITMS; HCD Score 66.3 m/z 516.3

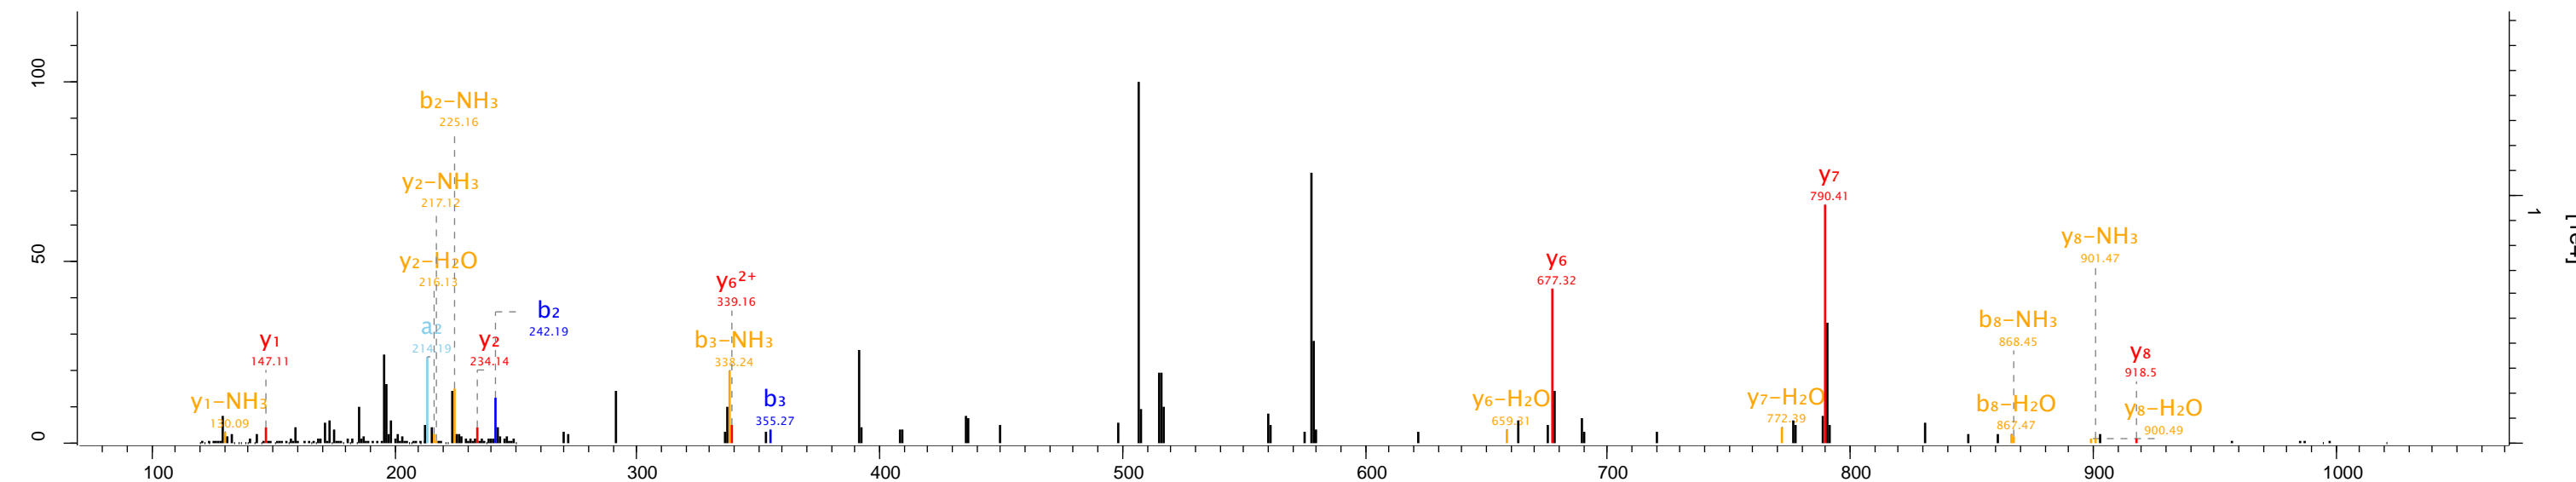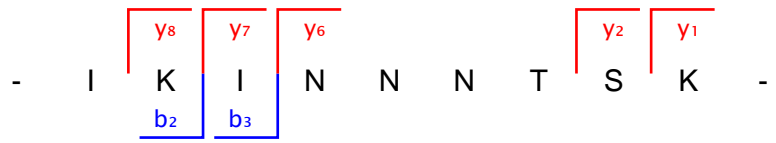

Spectral Annotation for Single-Peptide IDs between Single D11 Cells using Q-OT-LIT

Raw file 2015-01-08\_CL04\_Blastomere-15 Scan 37290 Method ITMS; HCD Score 67.21 m/z 513.3

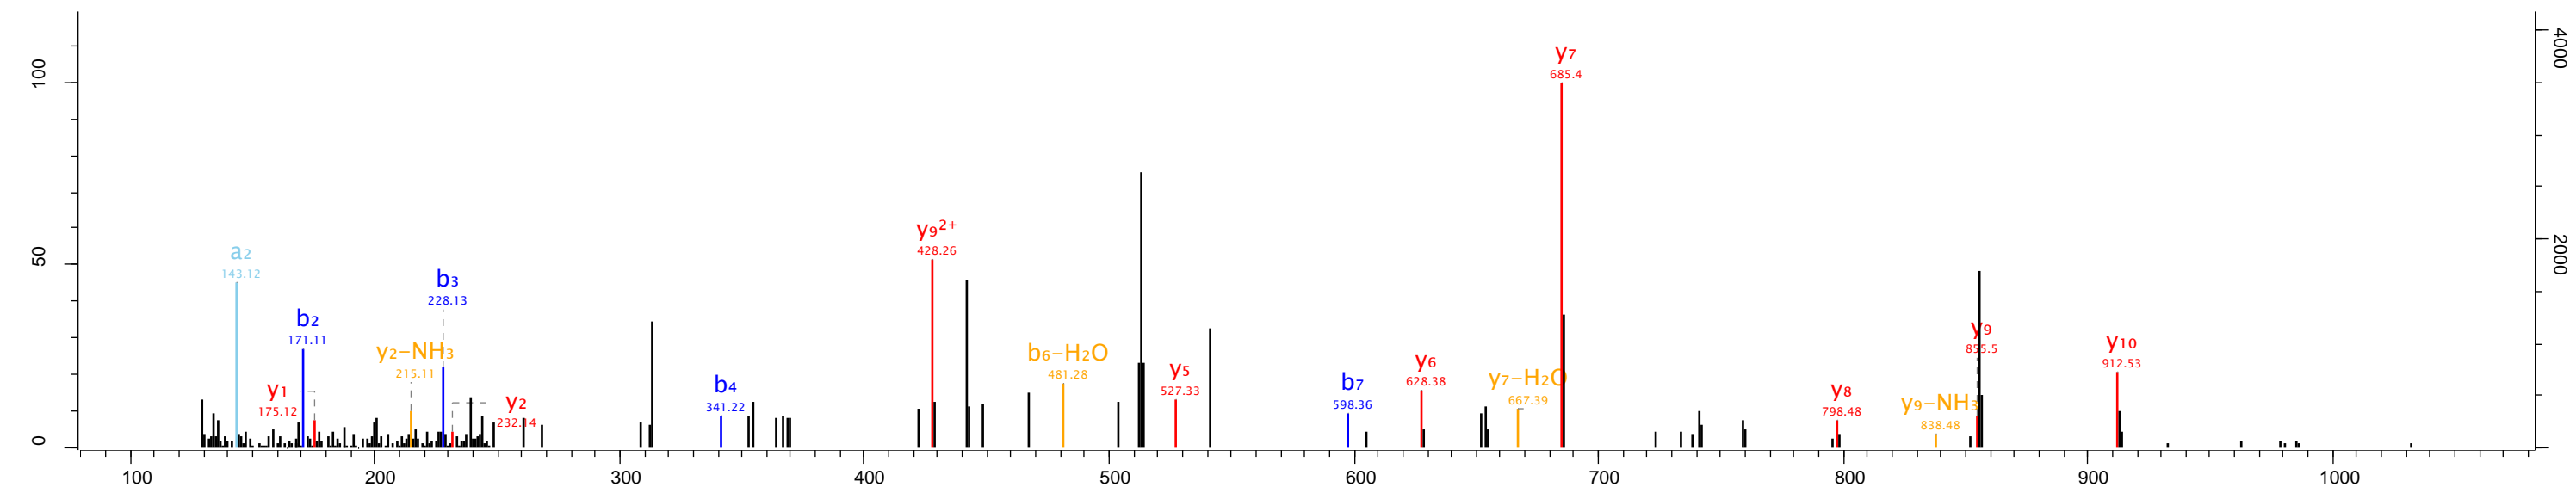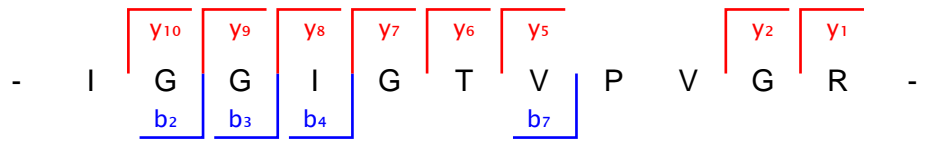

Raw file 2015-01-08\_CL04\_Blastomere-15 Scan 37321 Method ITMS; HCD Score 89.03 m/z 542.77

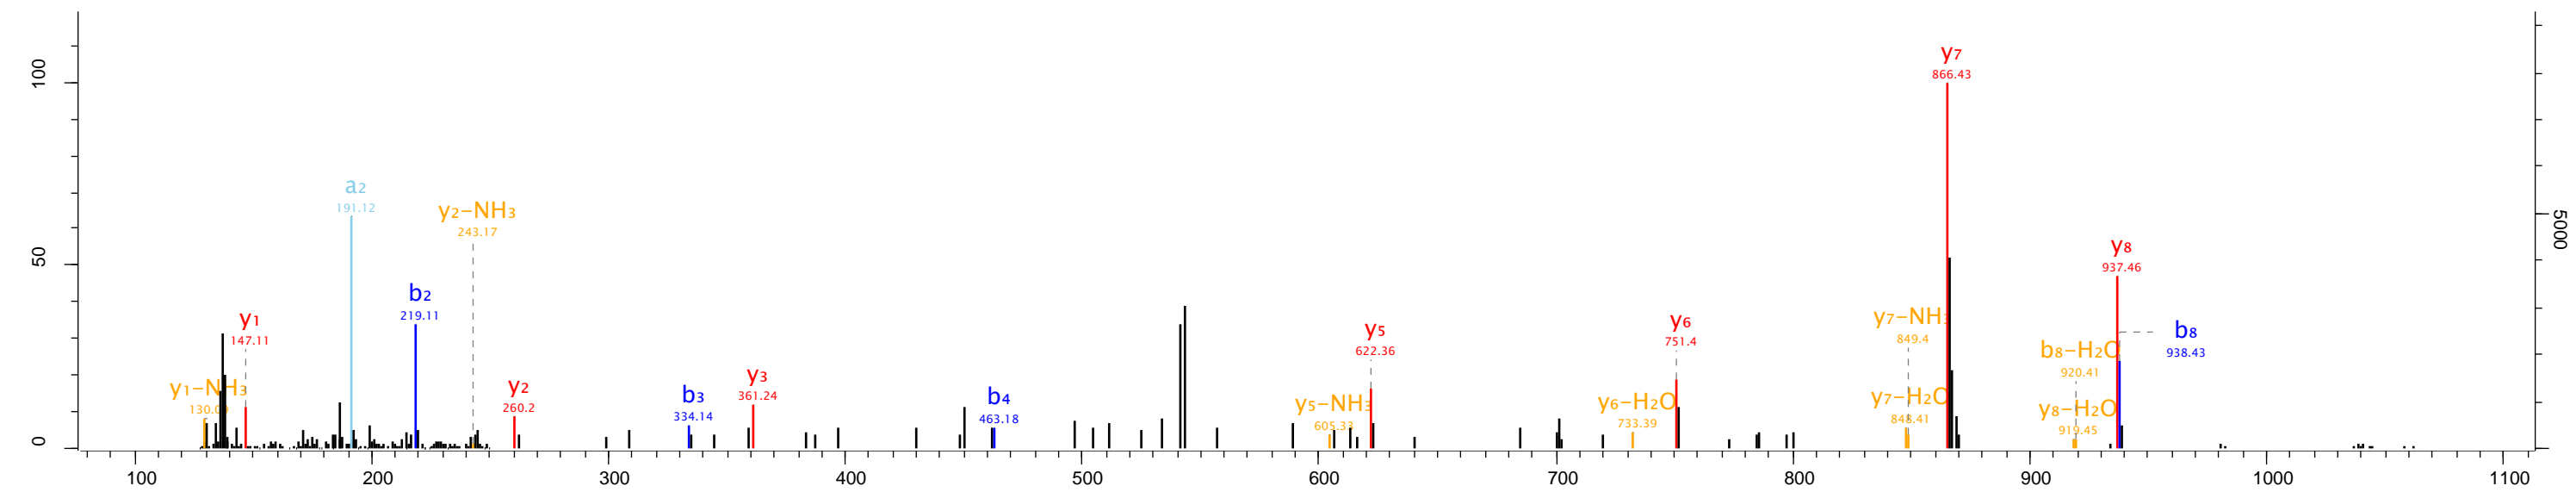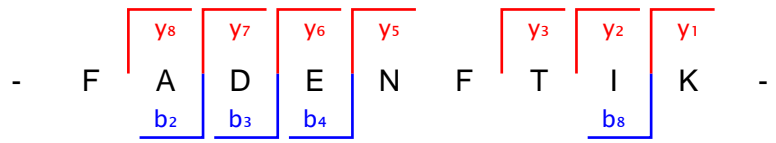

Raw file 2015-01-08\_CL04\_Blastomere-15 Scan 37378 Method ITMS; HCD Score 50.19 m/z 589.32

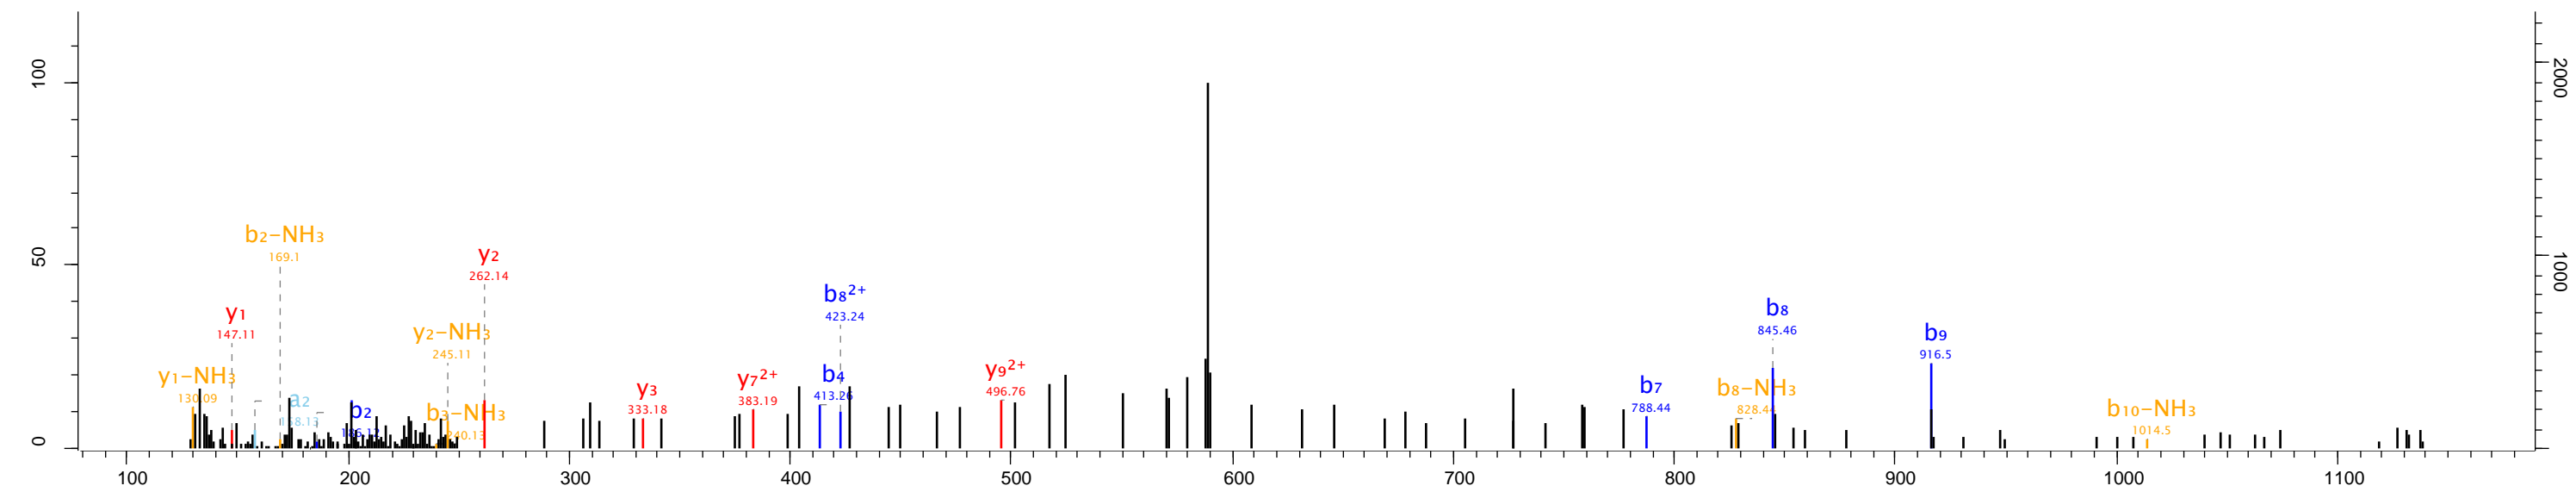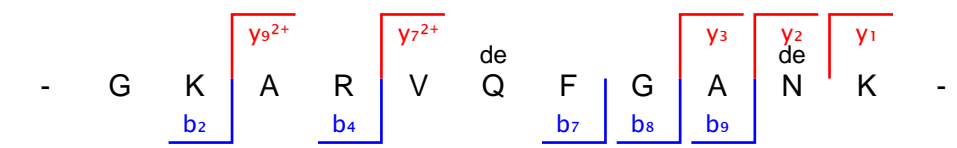

Spectral Annotation for Single-Peptide IDs between Single D11 Cells using Q-OT-LIT

Raw file 2015-01-08\_CL04\_Blastomere-15 Scan 37391 Method ITMS; HCD Score 46.46 m/z 552.3

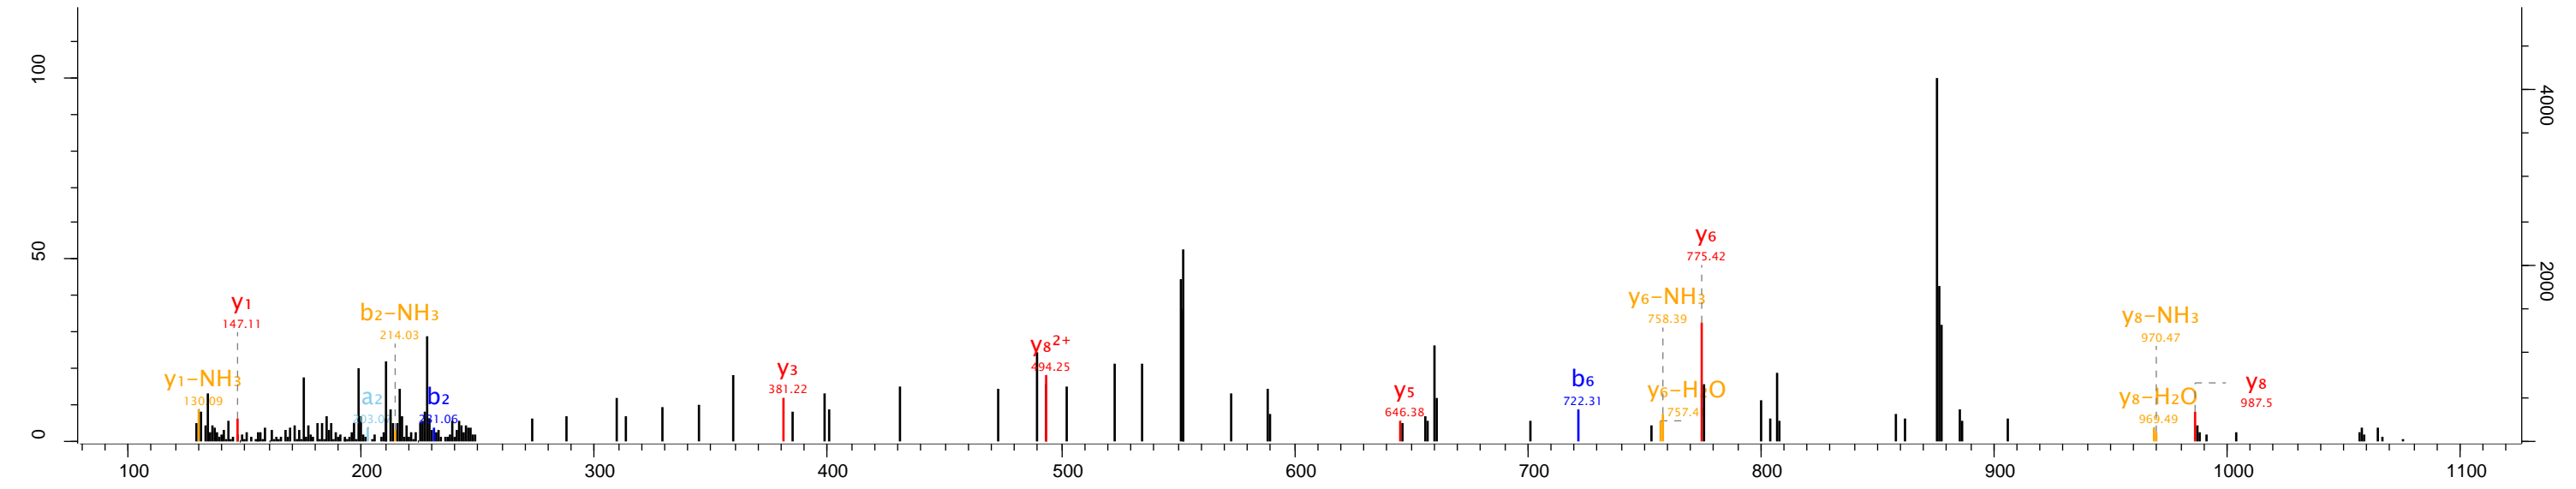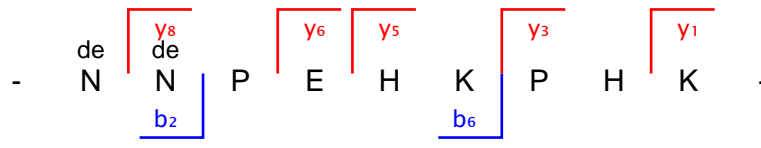

Spectral Annotation for Single-Peptide IDs between Single D11 Cells using Q-OT-LIT

Raw file 2015-01-08\_CL04\_Blastomere-15 Scan 37561 Method ITMS; HCD Score 132.9 m/z 677.37

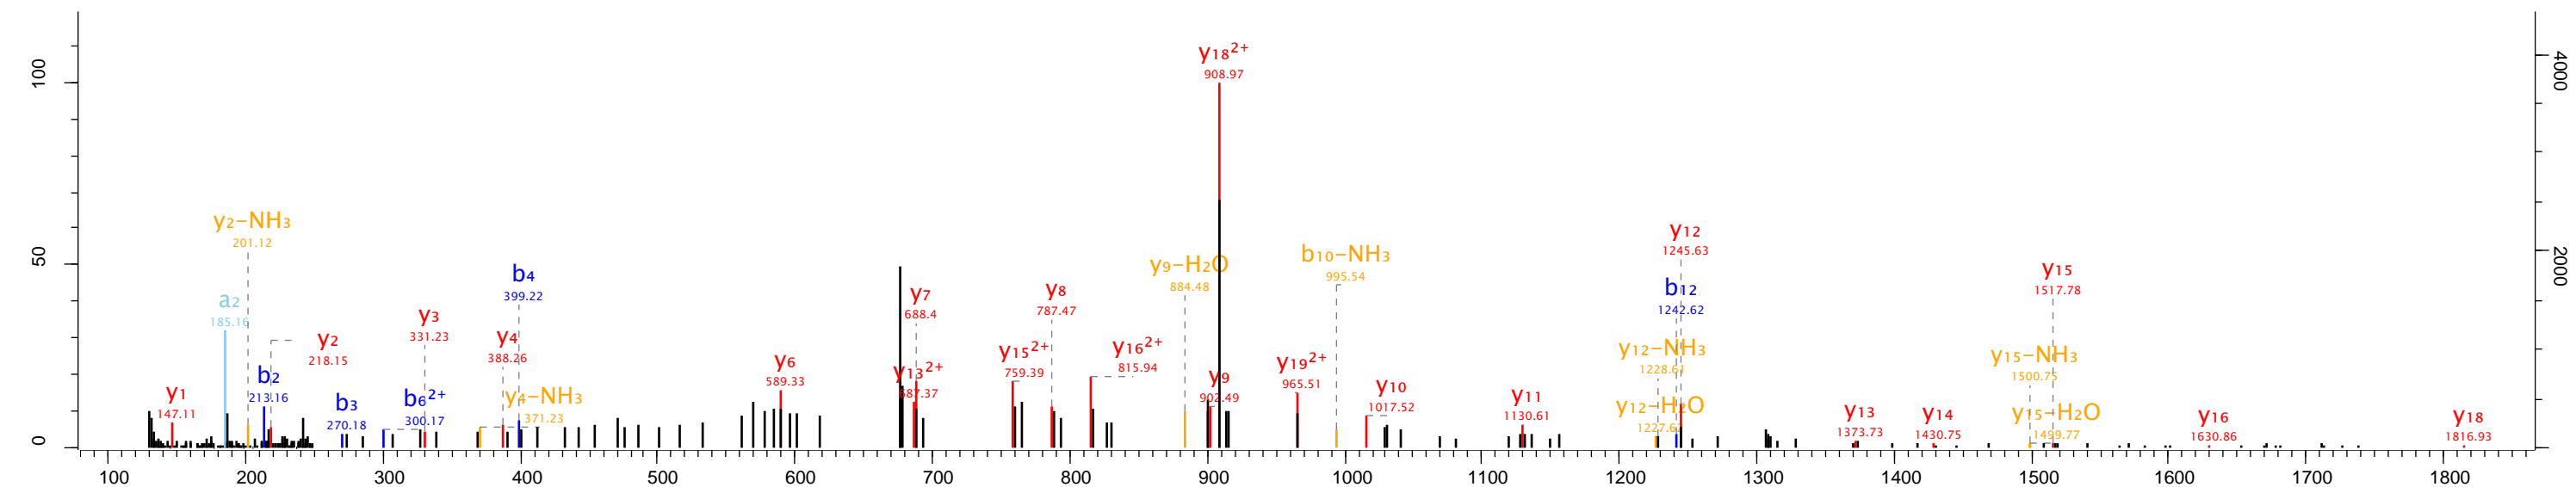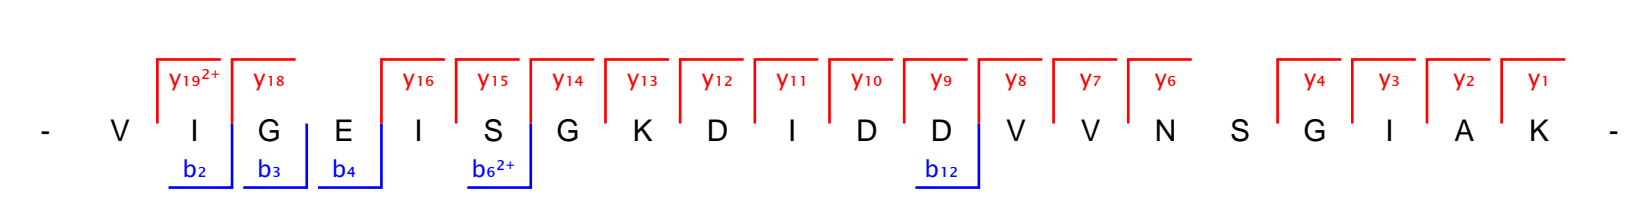

Spectral Annotation for Single-Peptide IDs between Single D11 Cells using Q-OT-LIT

Raw file 2015-01-08\_CL04\_Blastomere-15 Scan 37593 Method ITMS; HCD Score 96.56 m/z 677.03

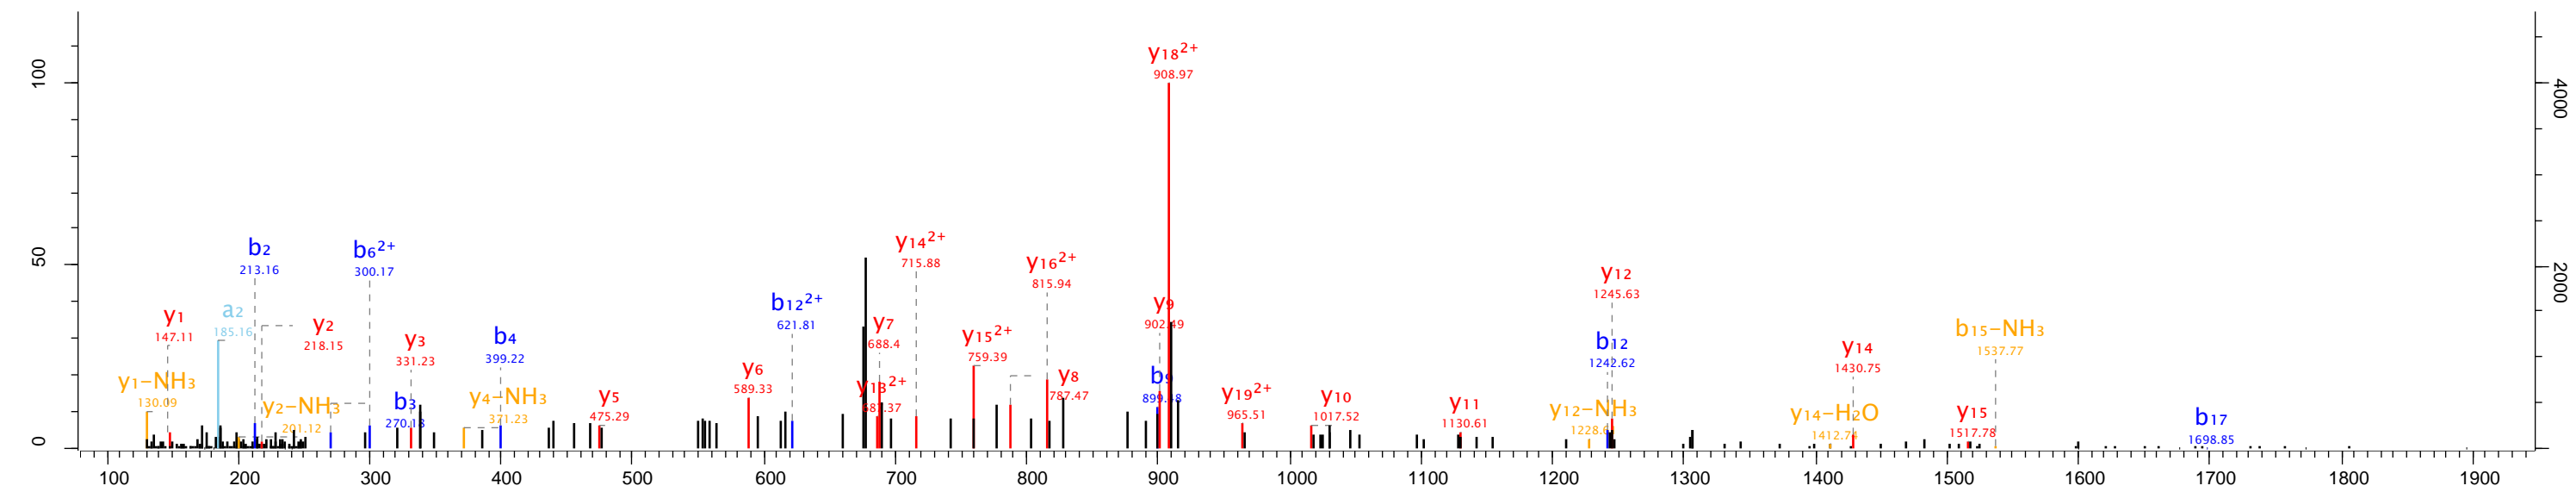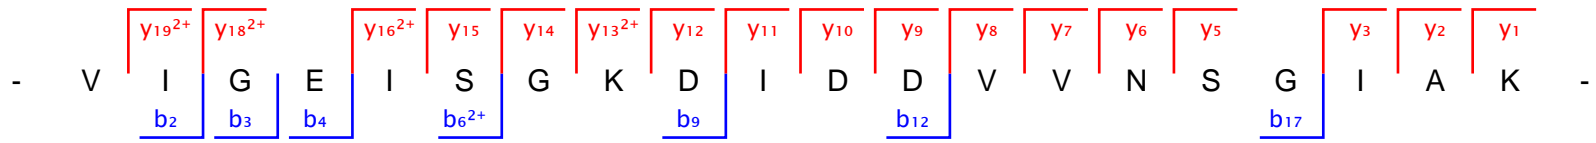

Spectral Annotation for Single-Peptide IDs between Single D11 Cells using Q-OT-LIT



Raw file 2015-01-08\_CL04\_Blastomere-15 Scan 37647 Method ITMS; HCD Score 67.21 m/z 513.3

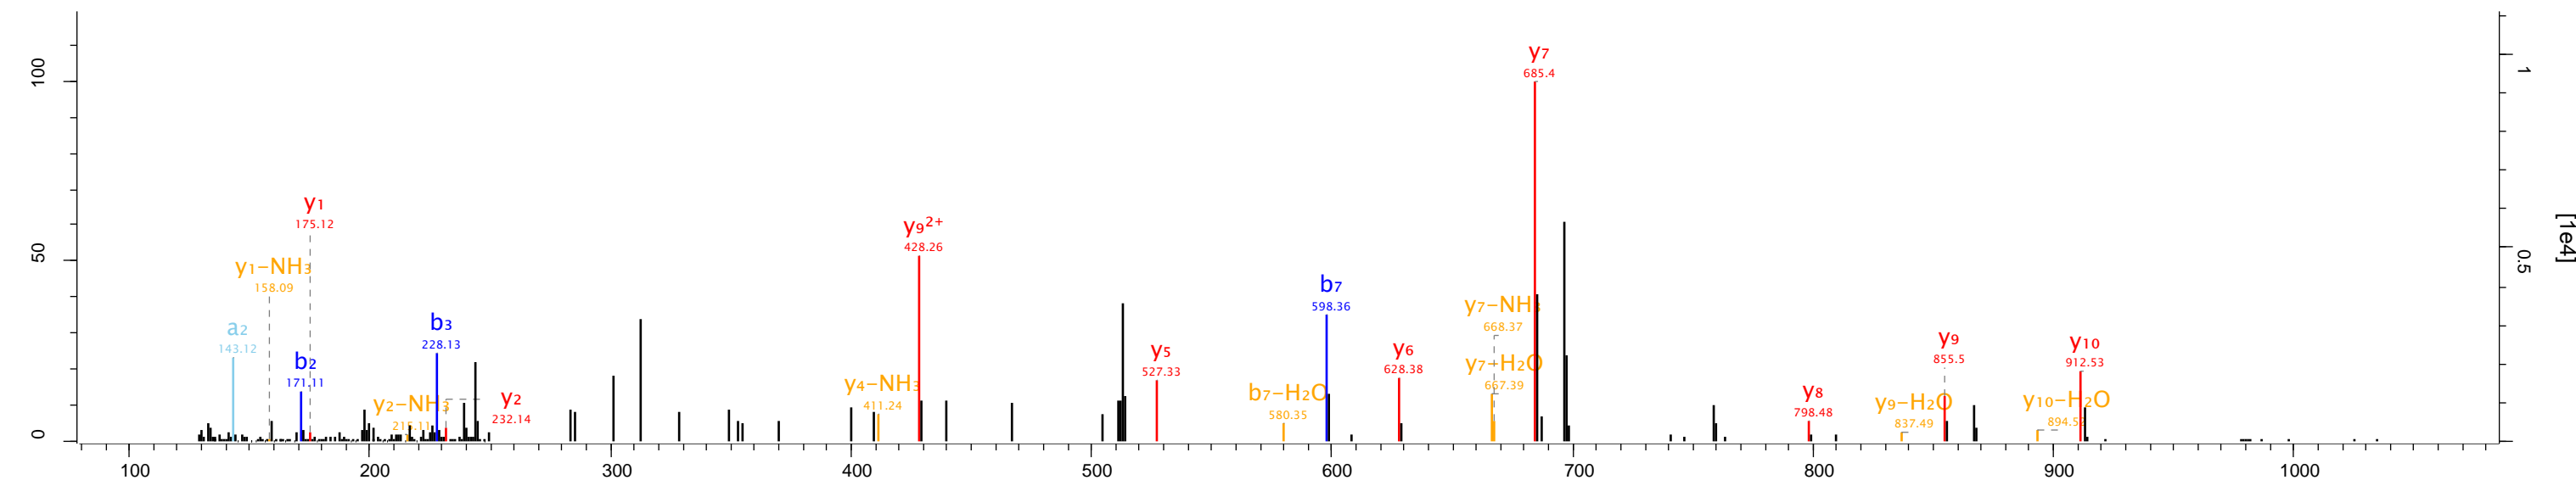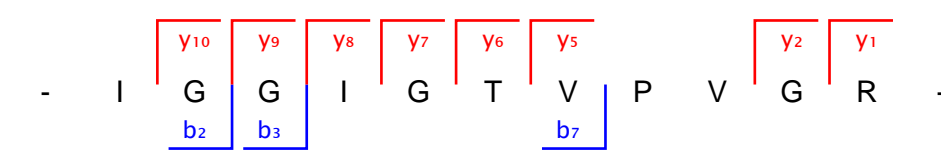

Raw file 2015-01-08\_CL04\_Blastomere-15 Scan 37659 Method ITMS; HCD Score 55.03 m/z 742.37

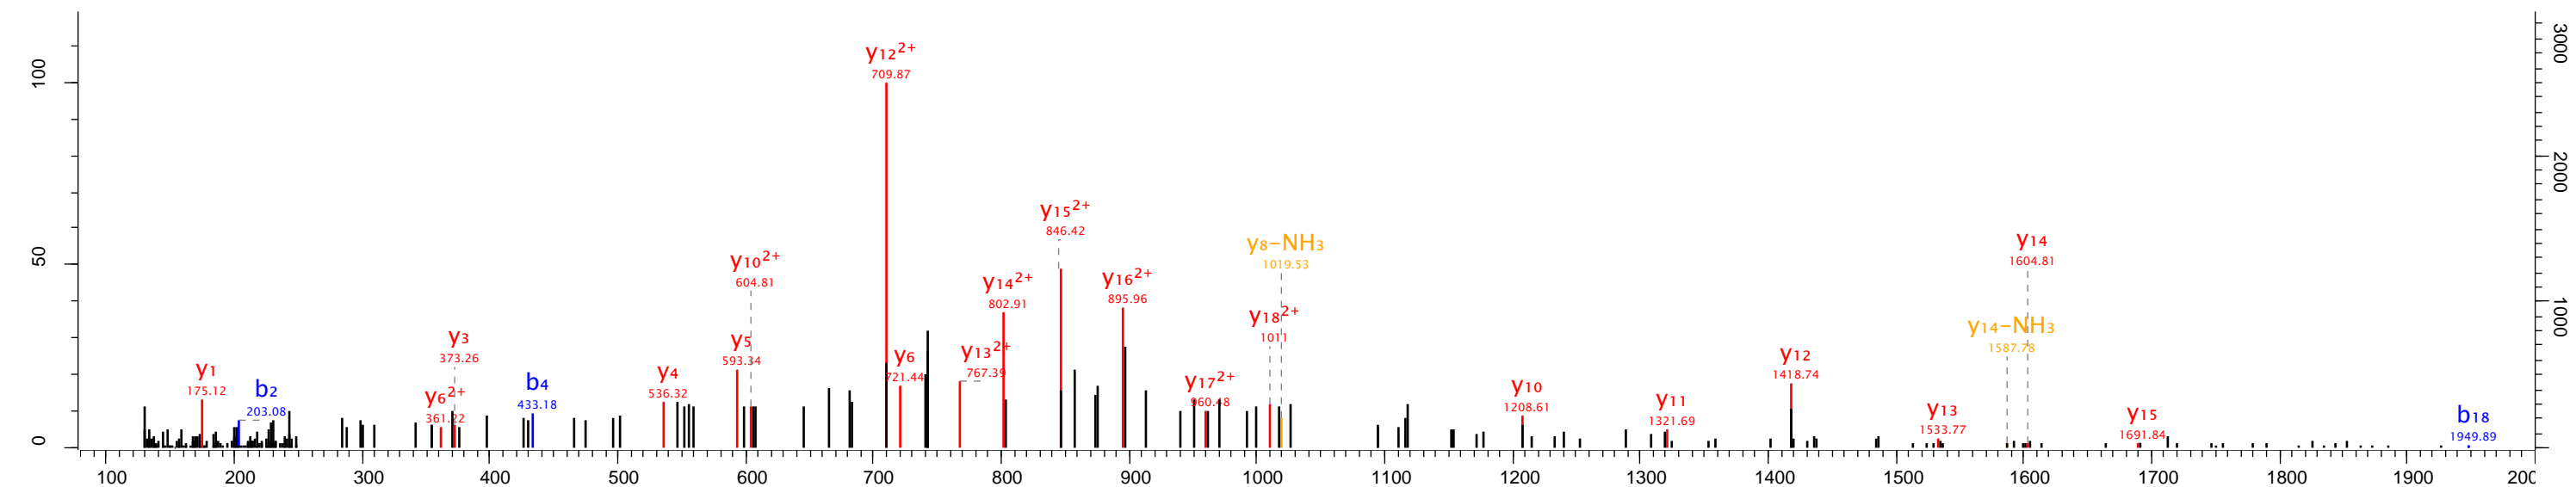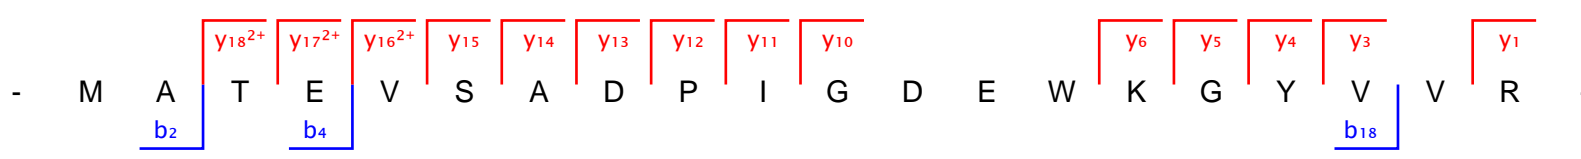

Spectral Annotation for Single-Peptide IDs between Single D11 Cells using Q-OT-LIT

Raw file 2015-01-08\_CL04\_Blastomere-15 Scan 37667 Method ITMS; HCD Score 46.36 m/z 703.37

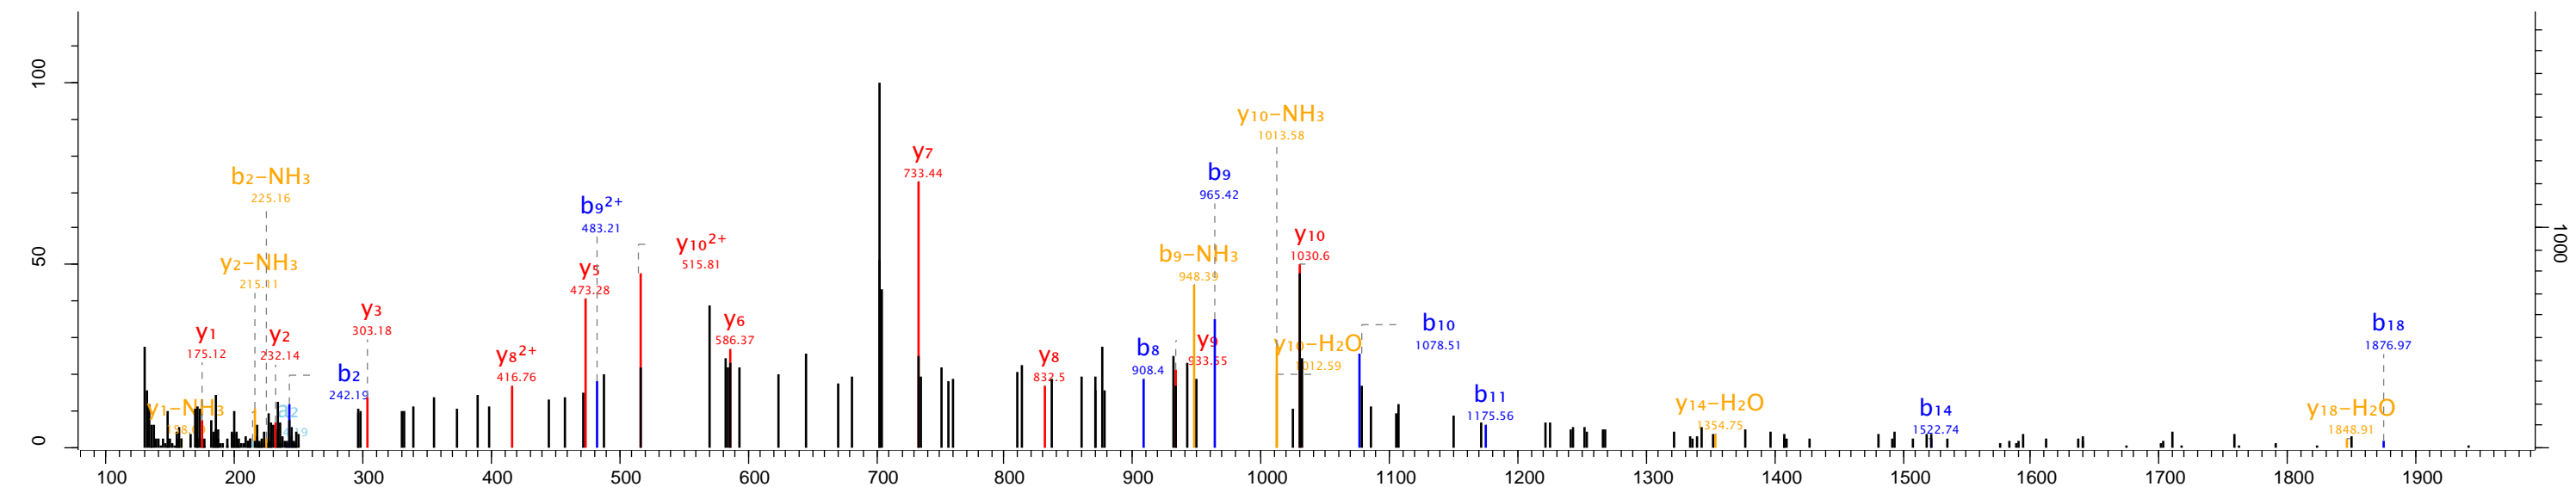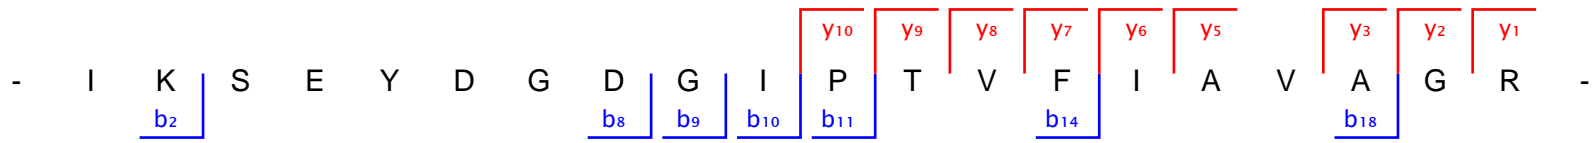

Raw file 2015-01-08\_CL04\_Blastomere-15 Scan 37688 Method ITMS; HCD Score 63.49 m/z 703.37

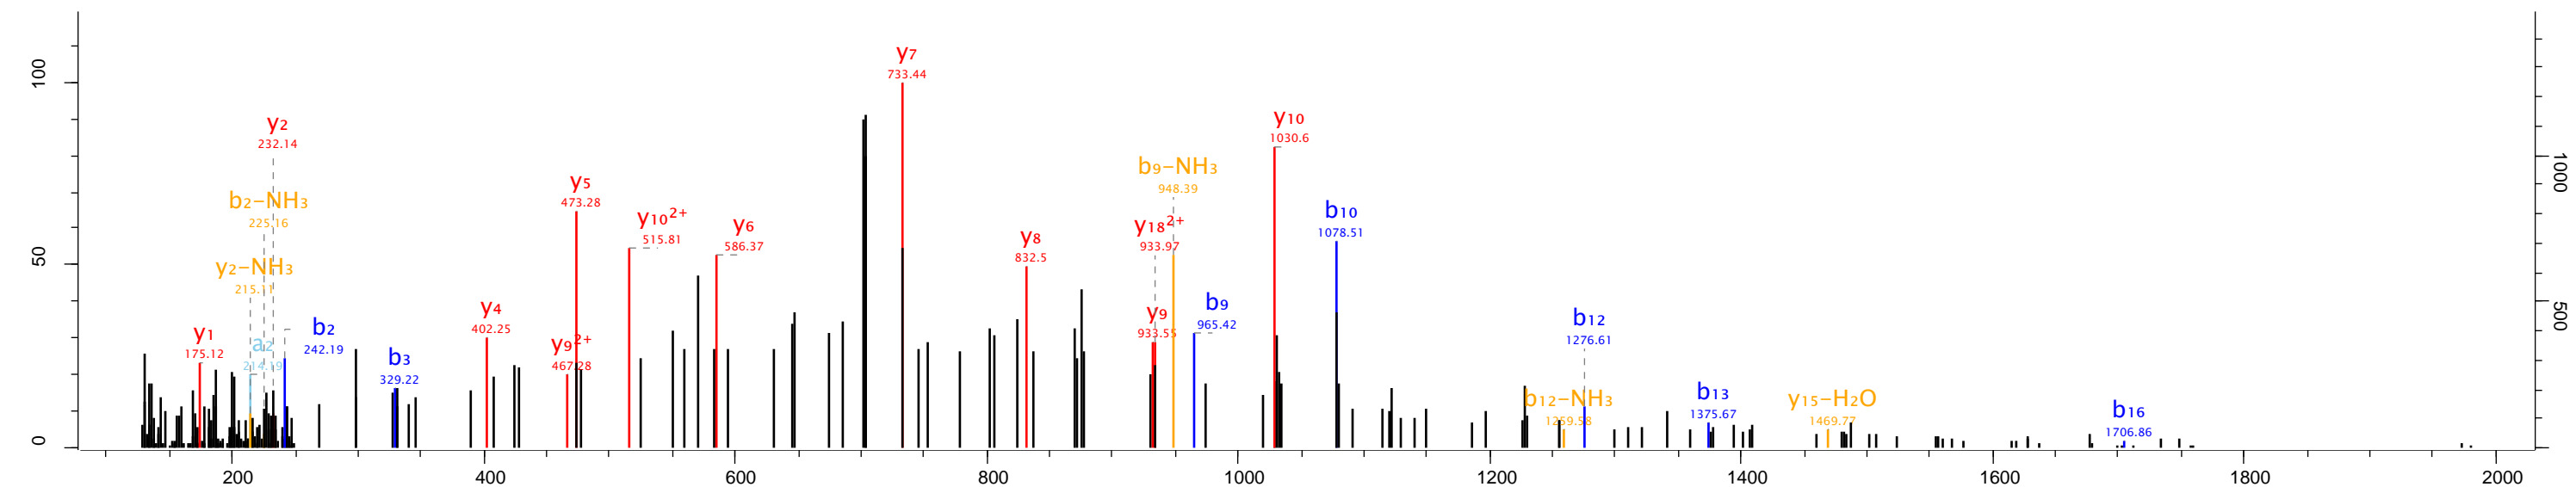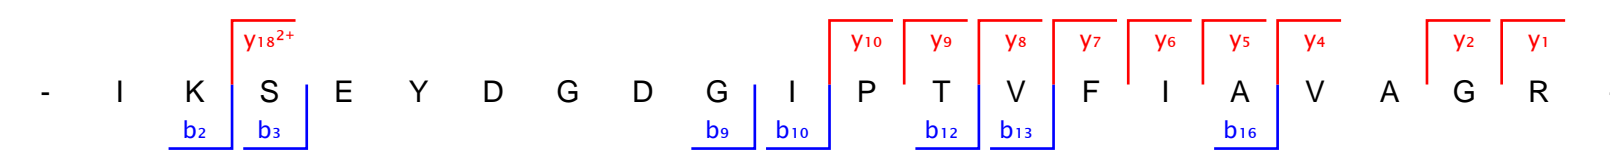

Spectral Annotation for Single-Peptide IDs between Single D11 Cells using Q-OT-LIT

Raw file 2015-01-08\_CL04\_Blastomere-15 Scan 37708 Method ITMS; HCD Score 47.73 m/z 742.36

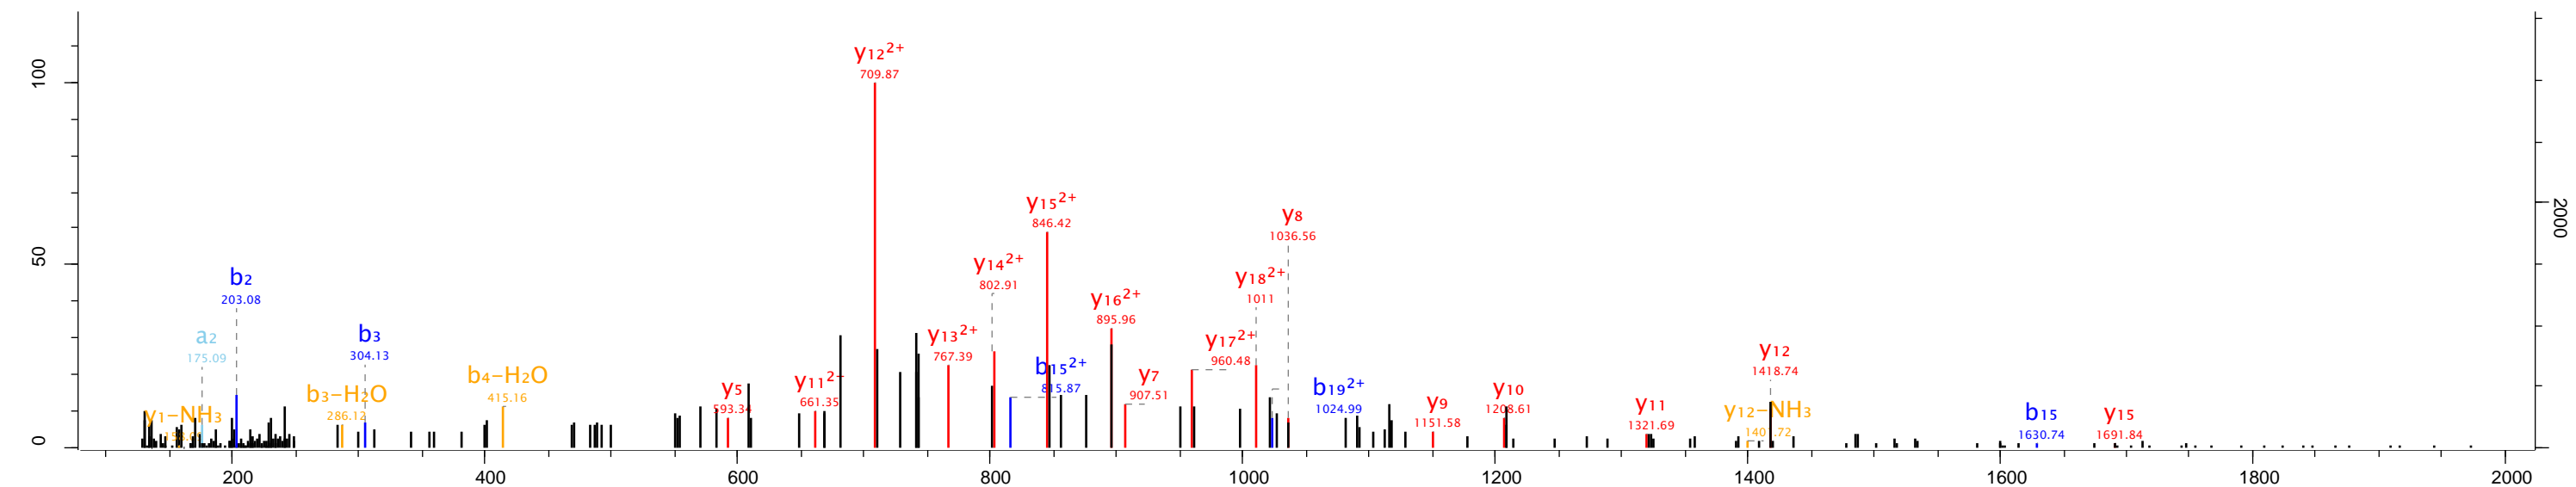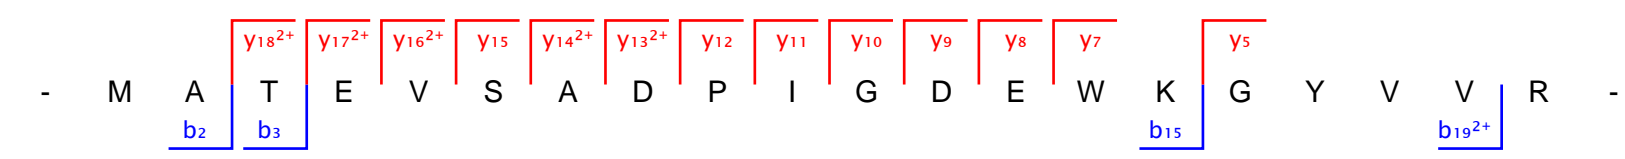

Spectral Annotation for Single-Peptide IDs between Single D11 Cells using Q-OT-LIT

Raw file 2015-01-08\_CL04\_Blastomere-15 Scan 37746 Method ITMS; HCD Score 56.42 m/z 742.03

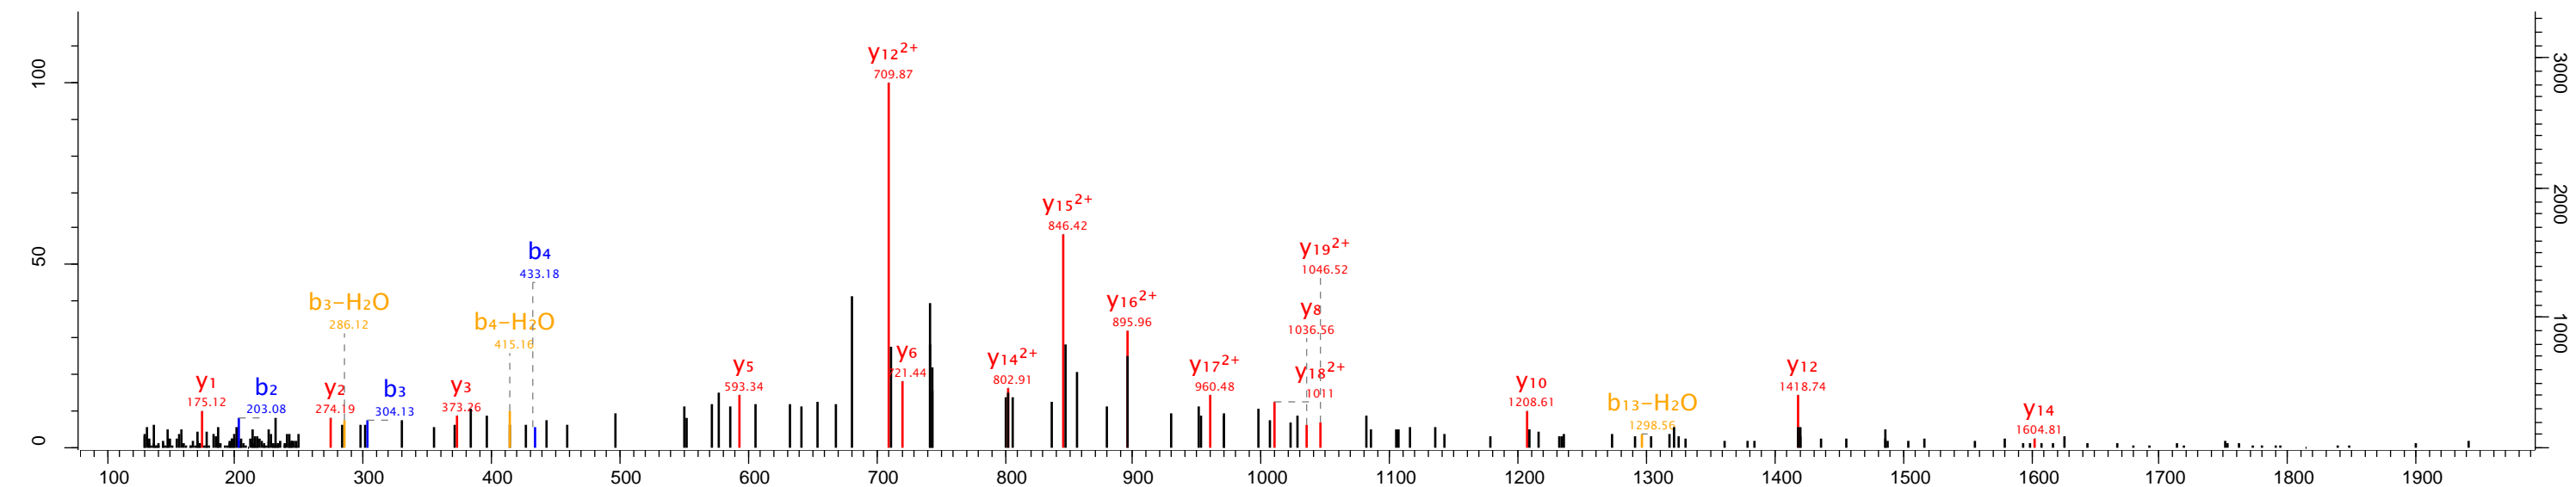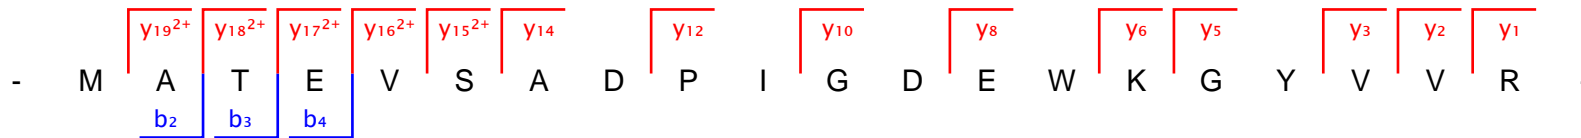

Spectral Annotation for Single-Peptide IDs between Single D11 Cells using Q-OT-LIT

Raw file 2015-01-08\_CL04\_Blastomere-15 Scan 37761 Method ITMS; HCD Score 48.37 m/z 703.37

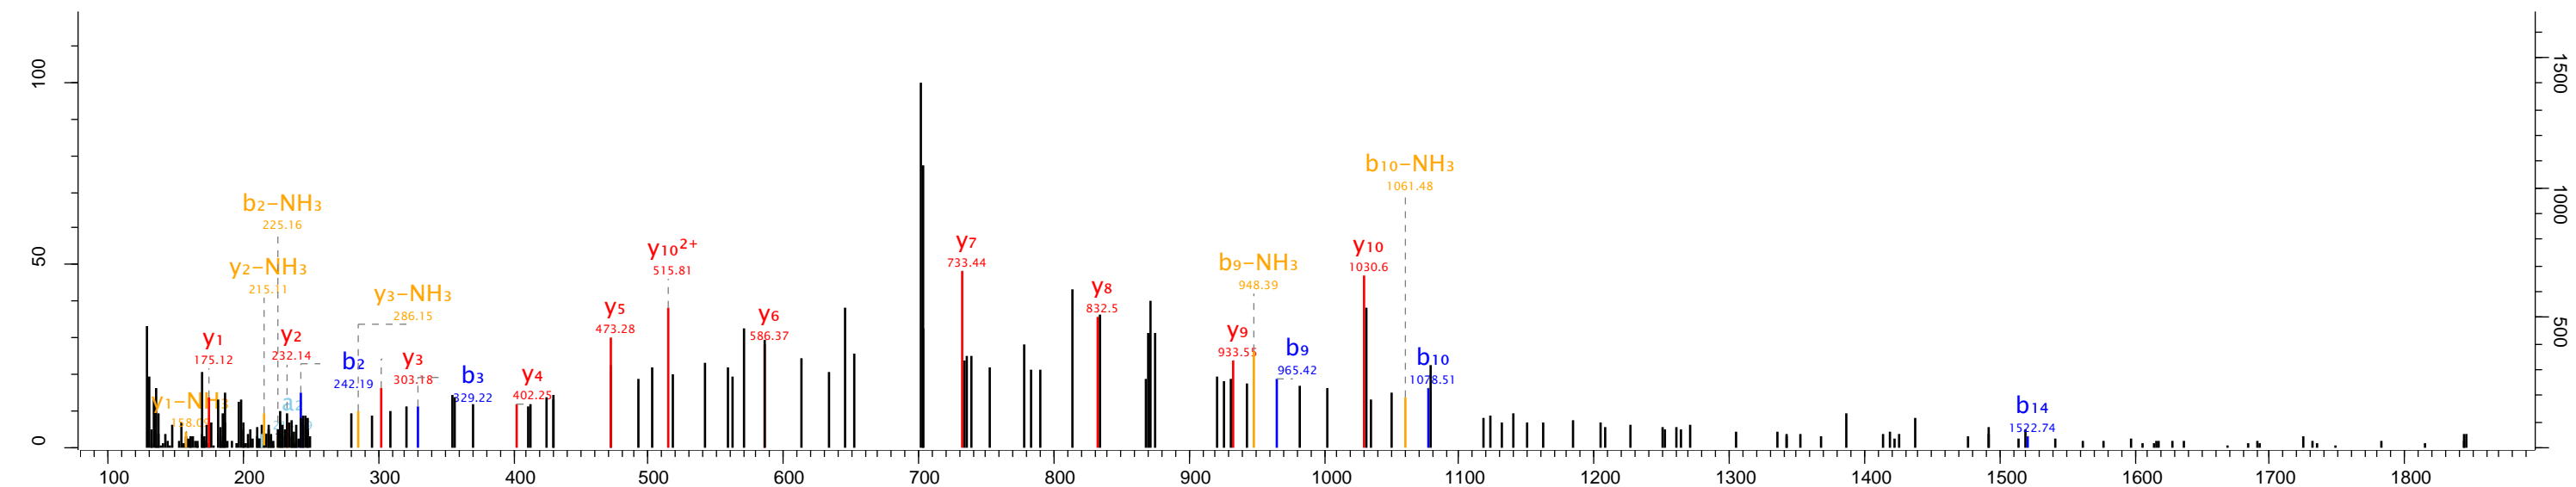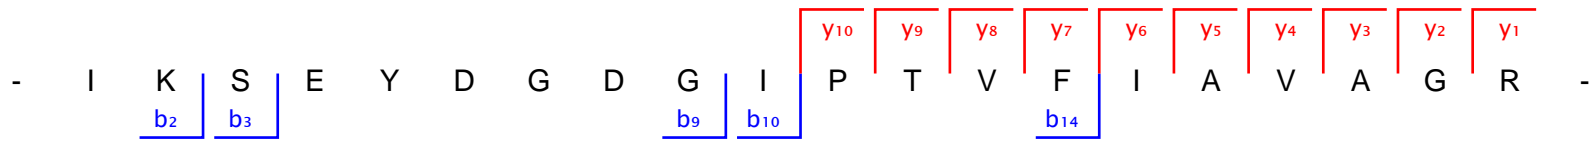

Spectral Annotation for Single-Peptide IDs between Single D11 Cells using Q-OT-LIT

Raw file 2015-01-08\_CL04\_Blastomere-15 Scan 38013 Method ITMS; HCD Score 28.39 m/z 730.72

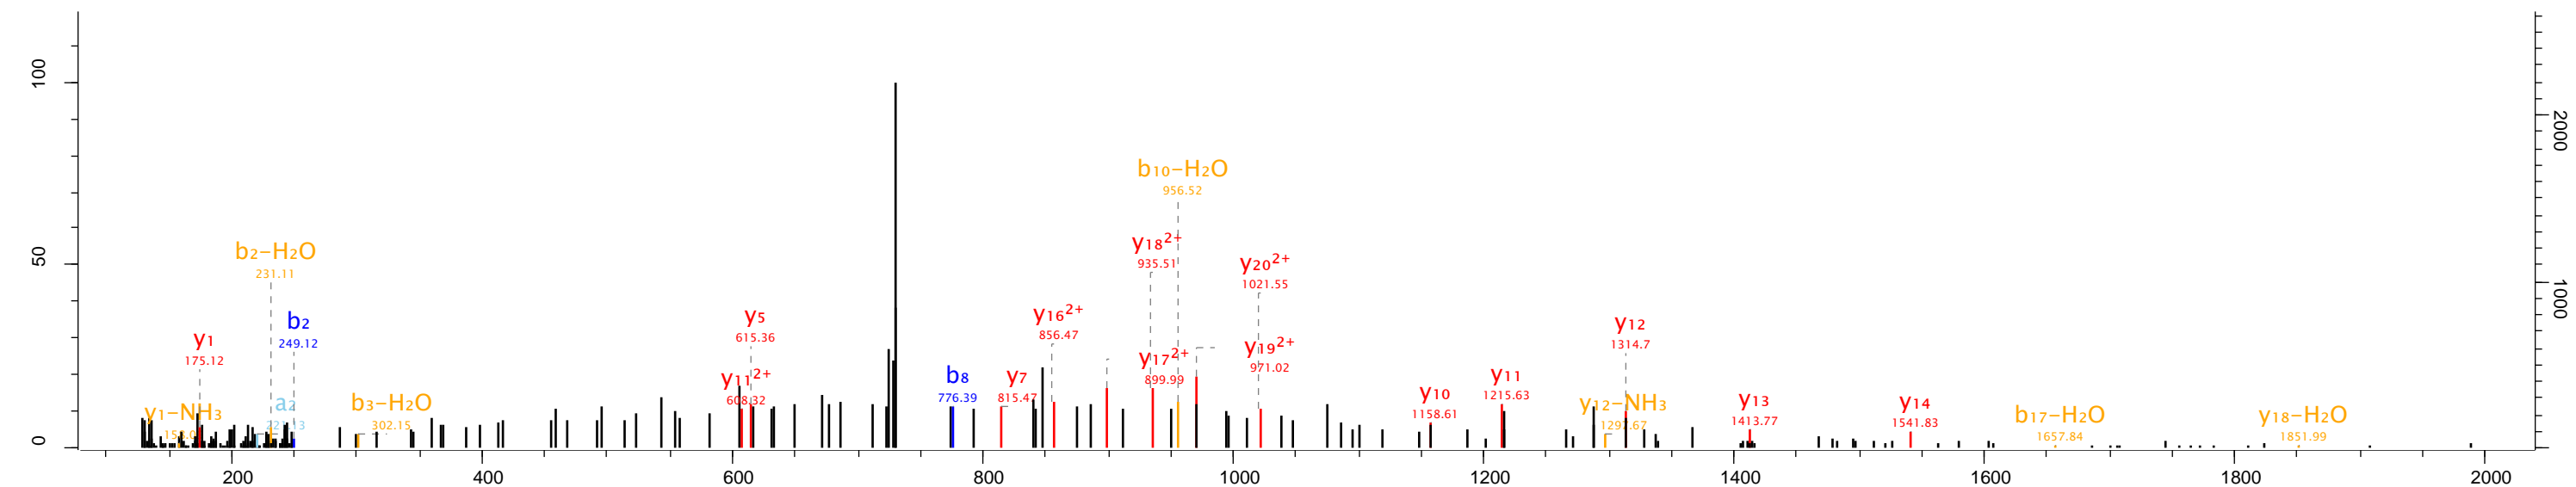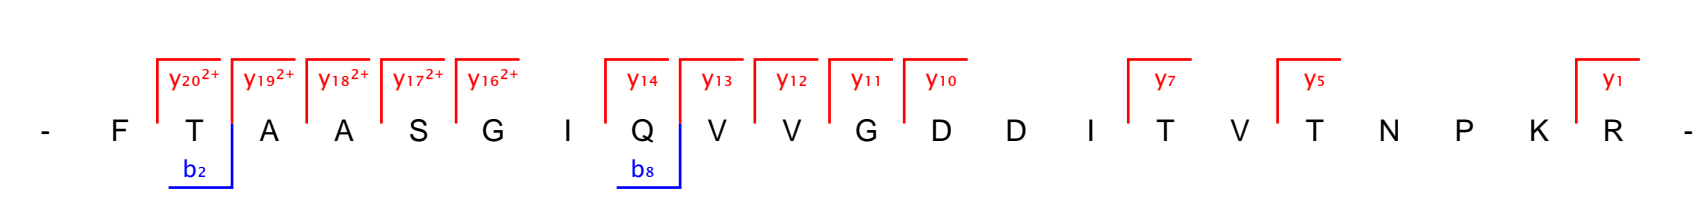

Spectral Annotation for Single-Peptide IDs between Single D11 Cells using Q-OT-LIT



Raw file 2015-01-08\_CL04\_Blastomere-15 Scan 38042 Method ITMS; HCD Score 69.86 m/z 624.84

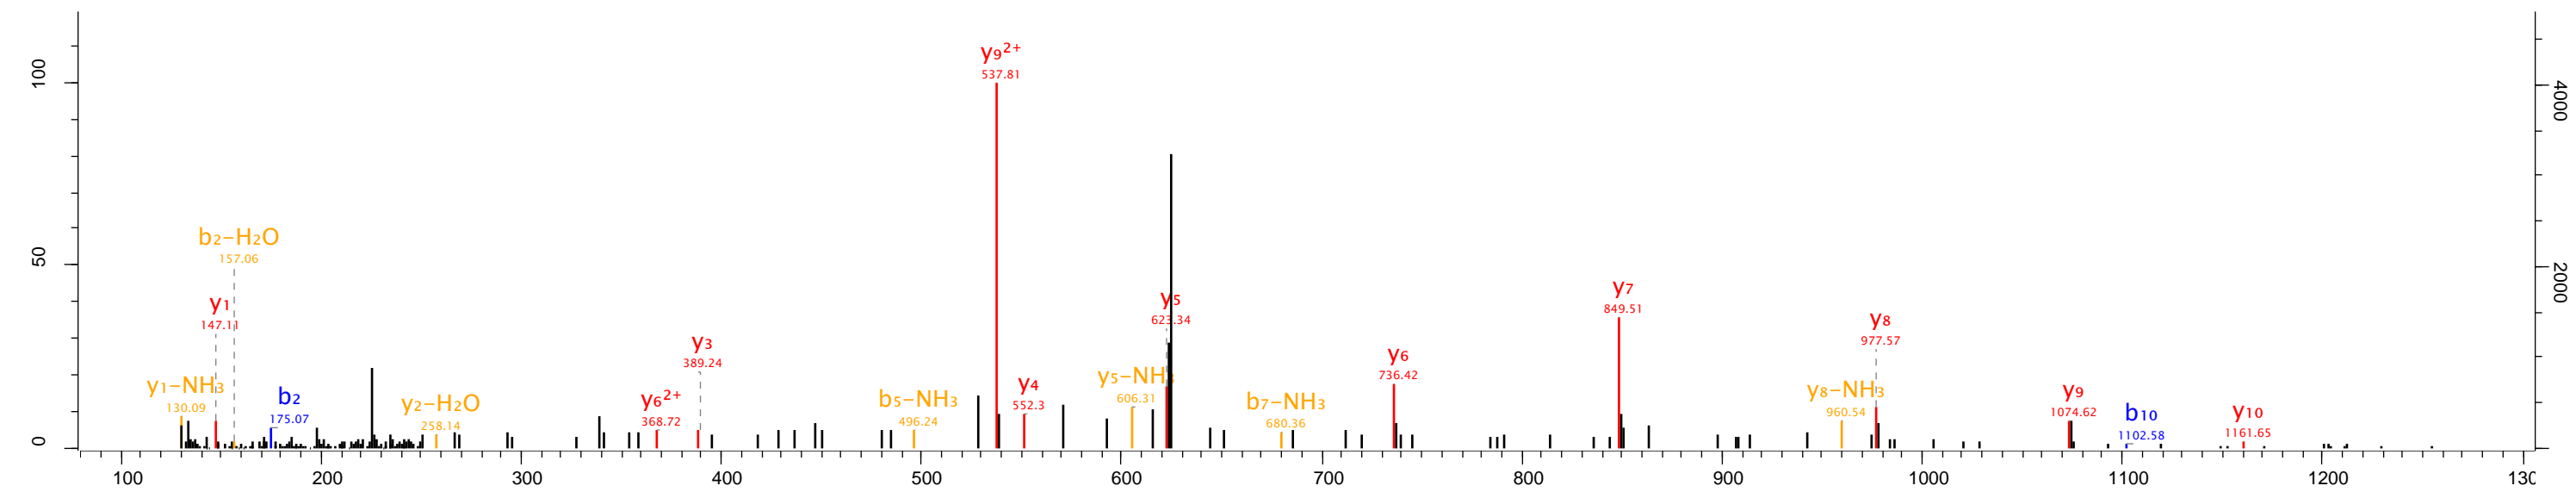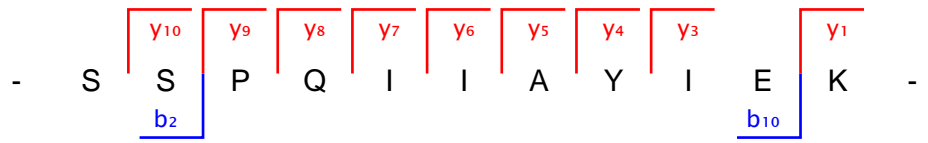

Spectral Annotation for Single-Peptide IDs between Single D11 Cells using Q-OT-LIT

Raw file 2015-01-08\_CL04\_Blastomere-15 Scan 38061 Method ITMS; HCD Score 73.76 m/z 730.72

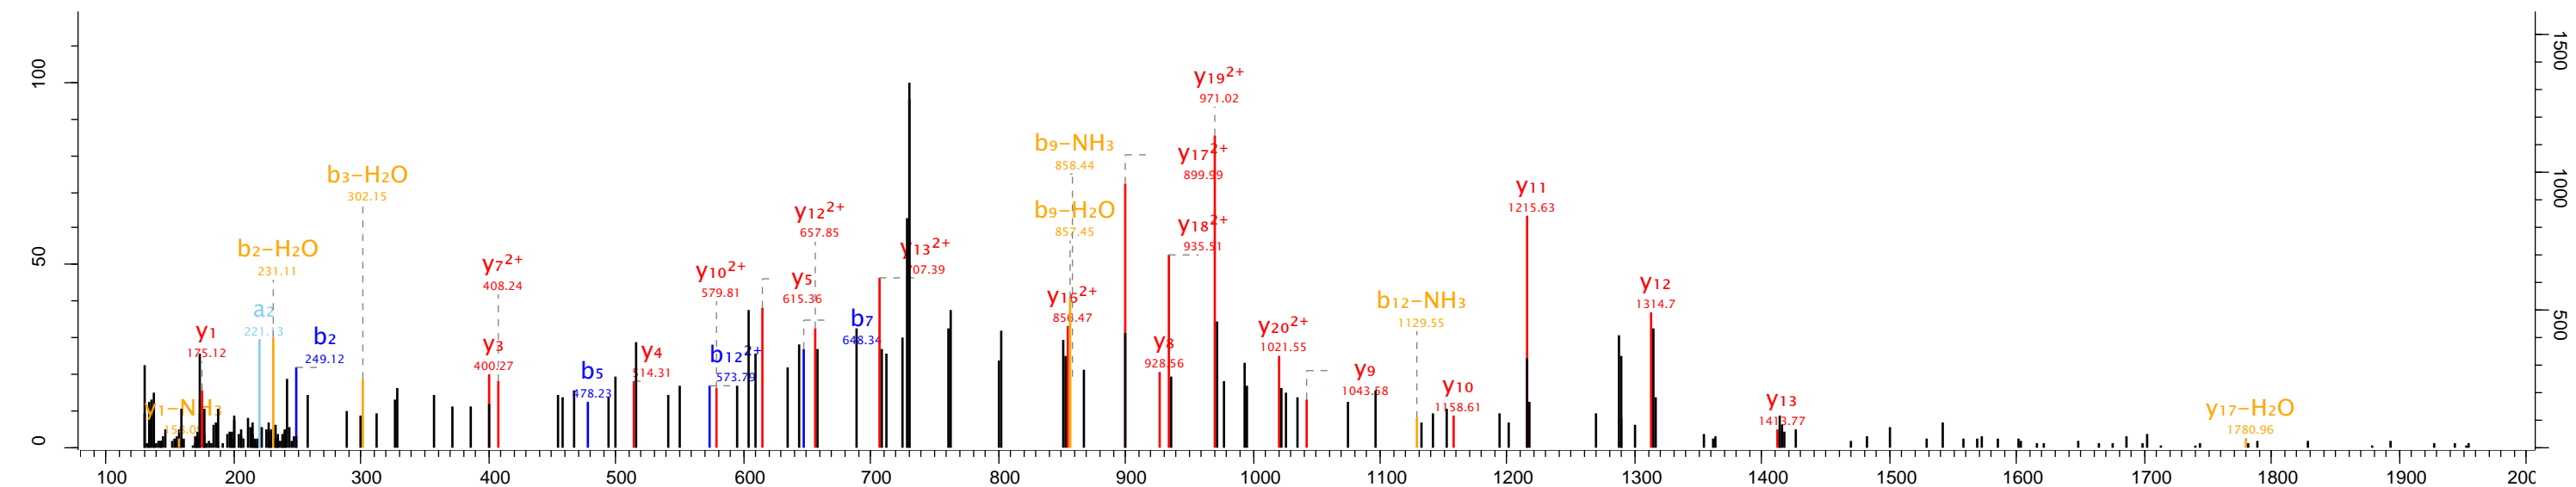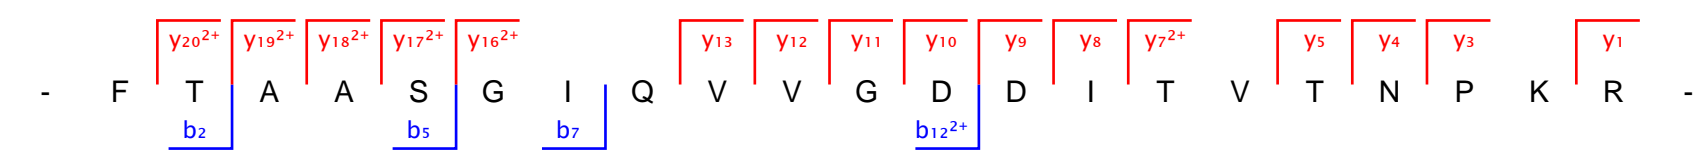

Spectral Annotation for Single-Peptide IDs between Single D11 Cells using Q-OT-LIT

Raw file 2015-01-08\_CL04\_Blastomere-15 Scan 38105 Method ITMS; HCD Score 113.54 m/z 730.72

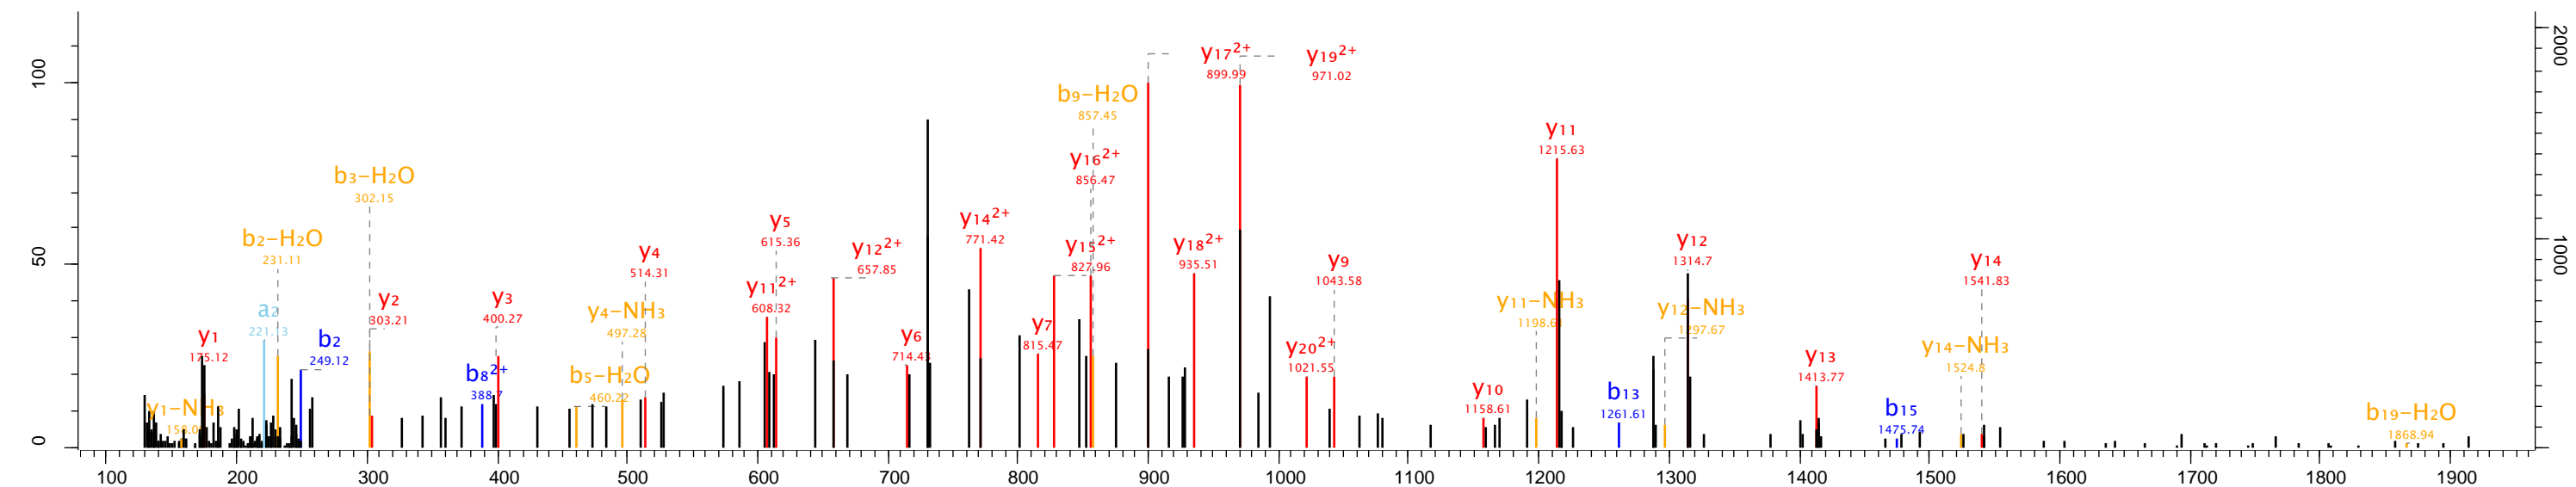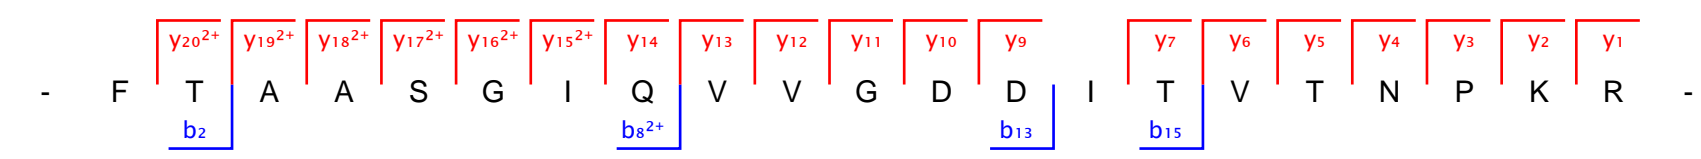

Spectral Annotation for Single-Peptide IDs between Single D11 Cells using Q-OT-LIT

Raw file 2015-01-08\_CL04\_Blastomere-15 Scan 38150 Method ITMS; HCD Score 71.79 m/z 756.65

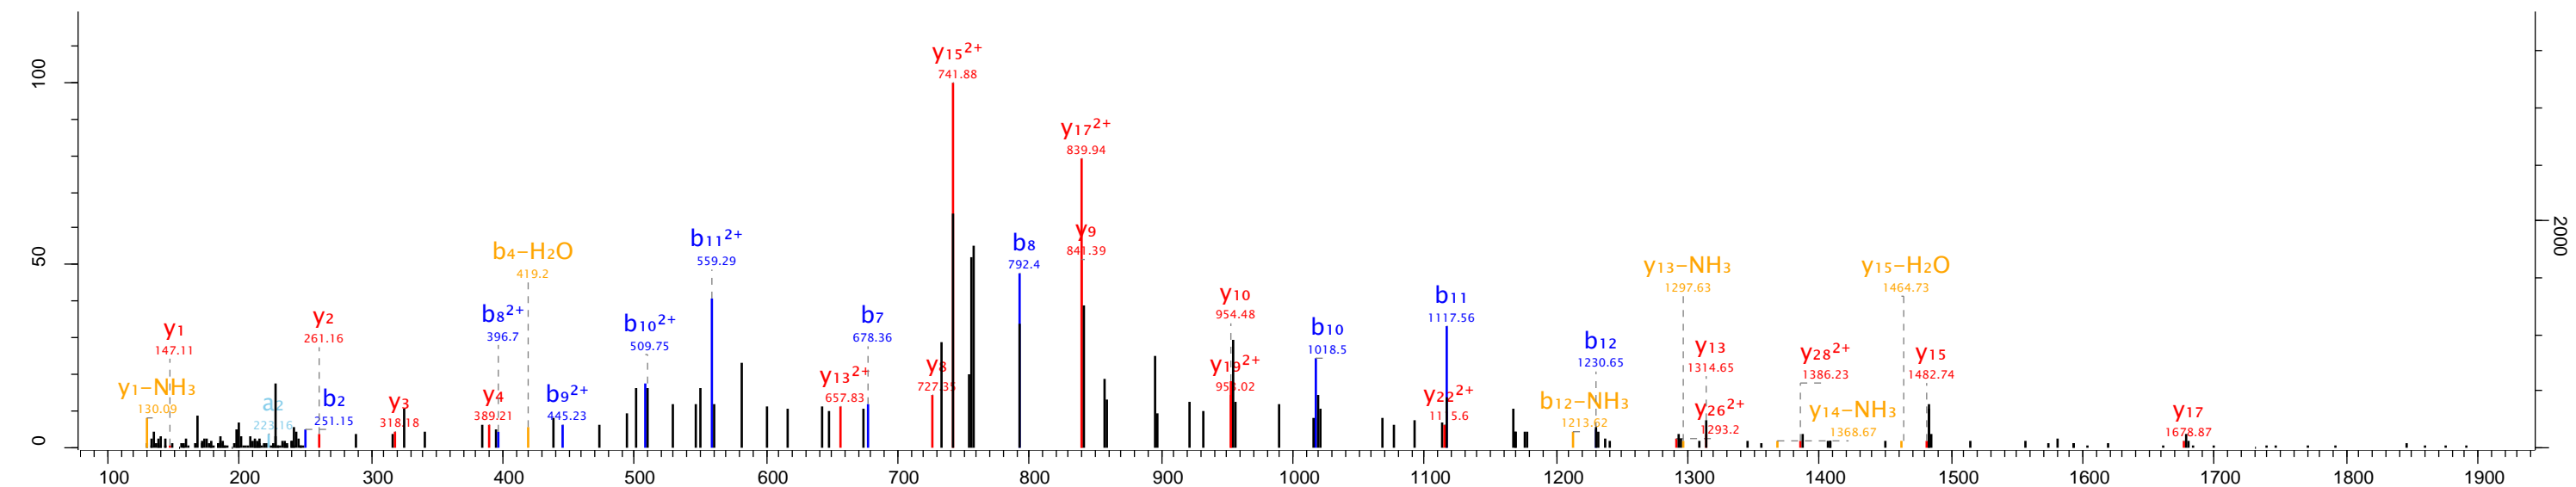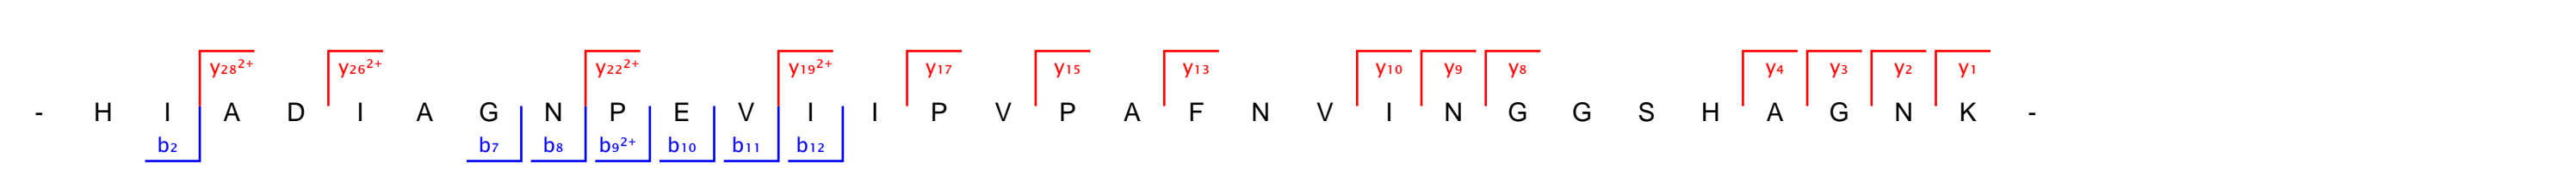

Spectral Annotation for Single-Peptide IDs between Single D11 Cells using Q-OT-LIT

Raw file 2015-01-08\_CL04\_Blastomere-15 Scan 38302 Method ITMS; HCD Score 56.85 m/z 756.65

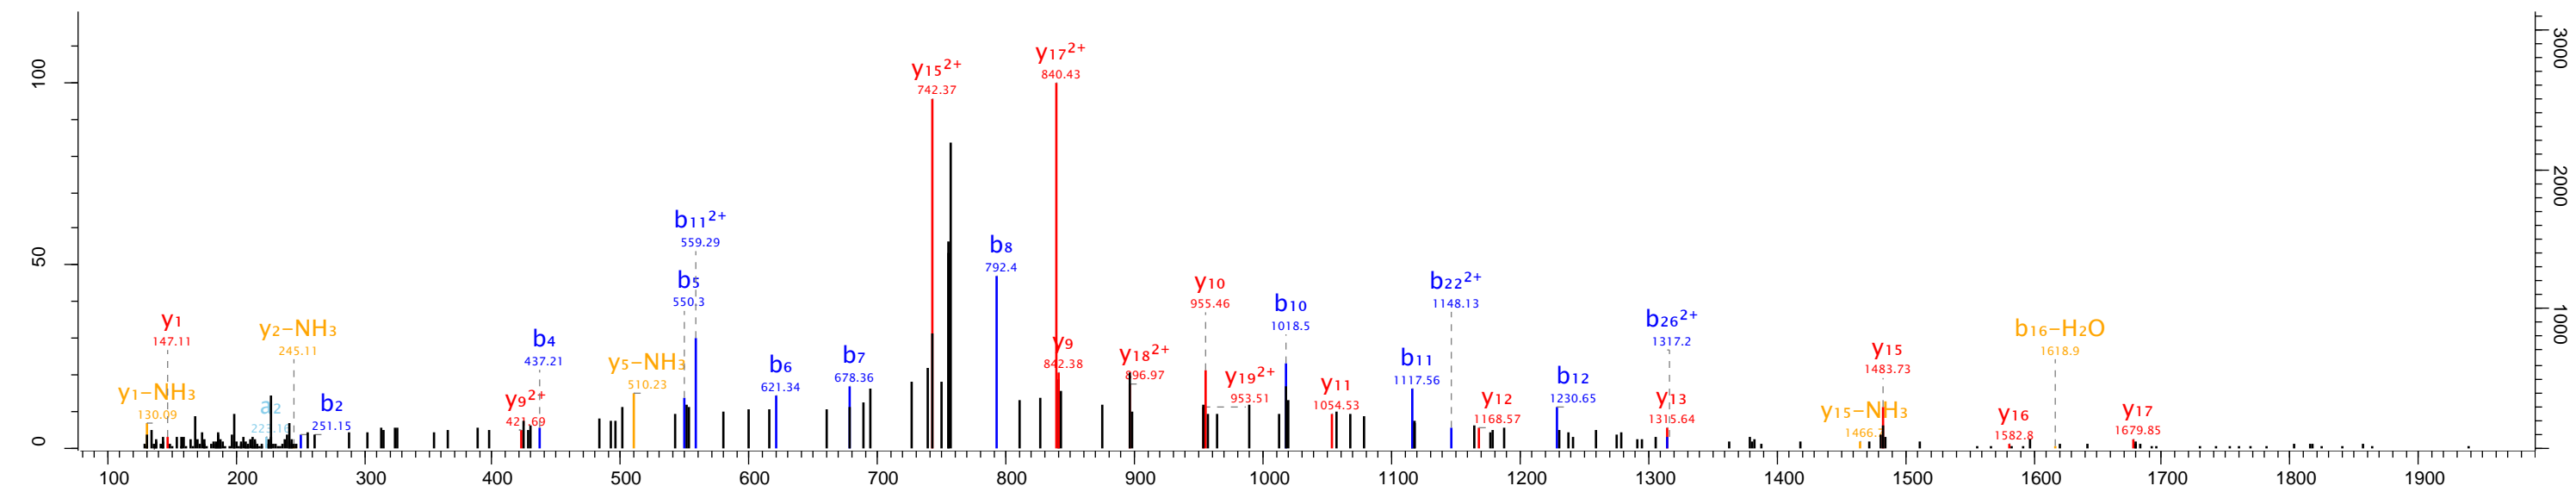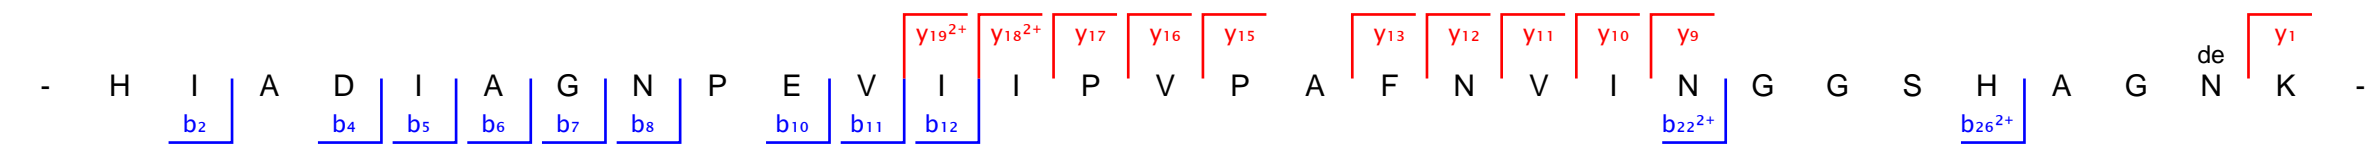

Spectral Annotation for Single-Peptide IDs between Single D11 Cells using Q-OT-LIT

Raw file 2015-01-08\_CL04\_Blastomere-15 Scan 38337 Method ITMS; HCD Score 70.99 m/z 720.36

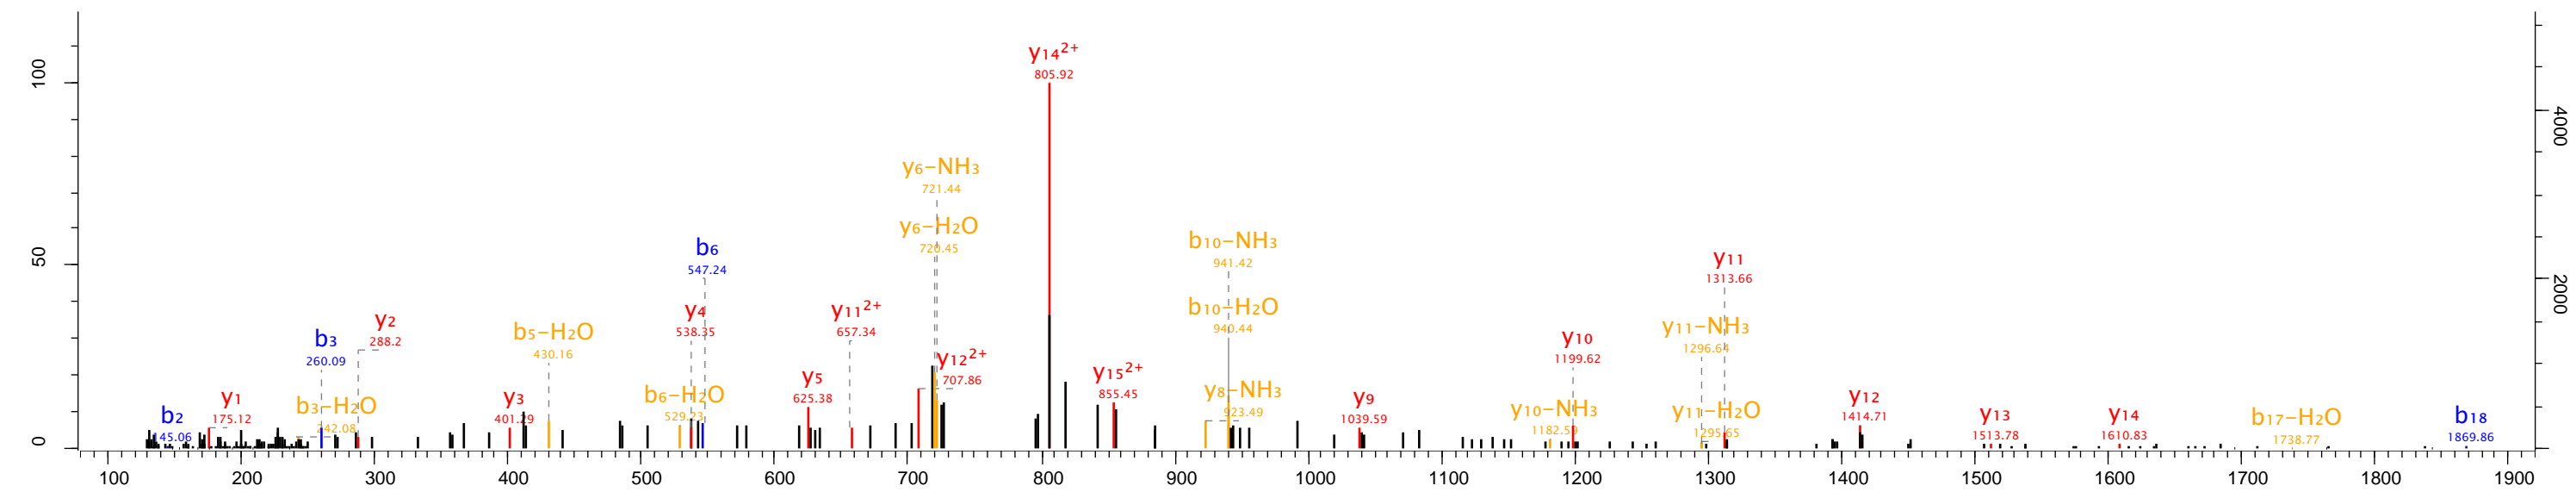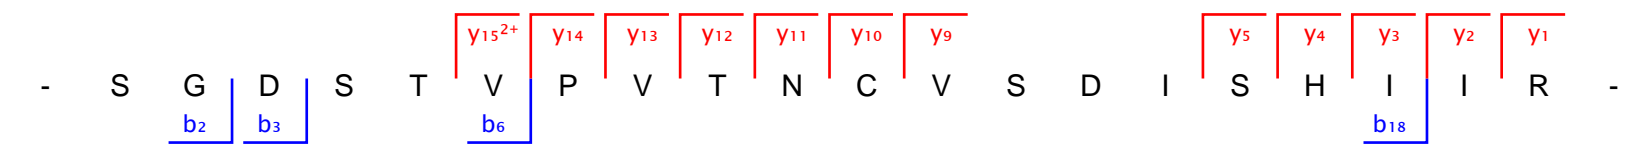

Spectral Annotation for Single-Peptide IDs between Single D11 Cells using Q-OT-LIT

Raw file 2015-01-08\_CL04\_Blastomere-15 Scan 38340 Method ITMS; HCD Score 67.93 m/z 730.72

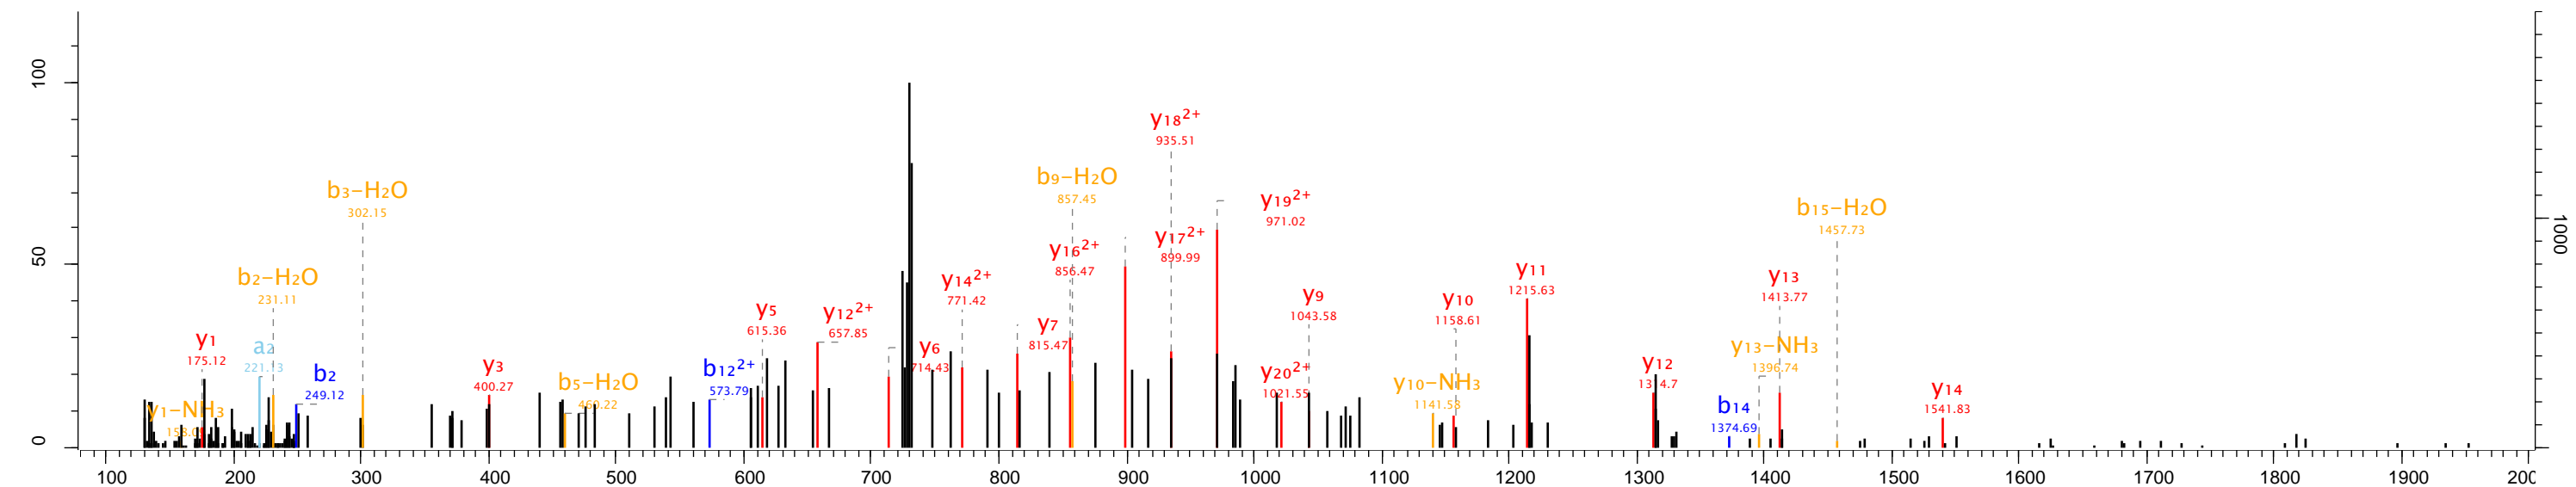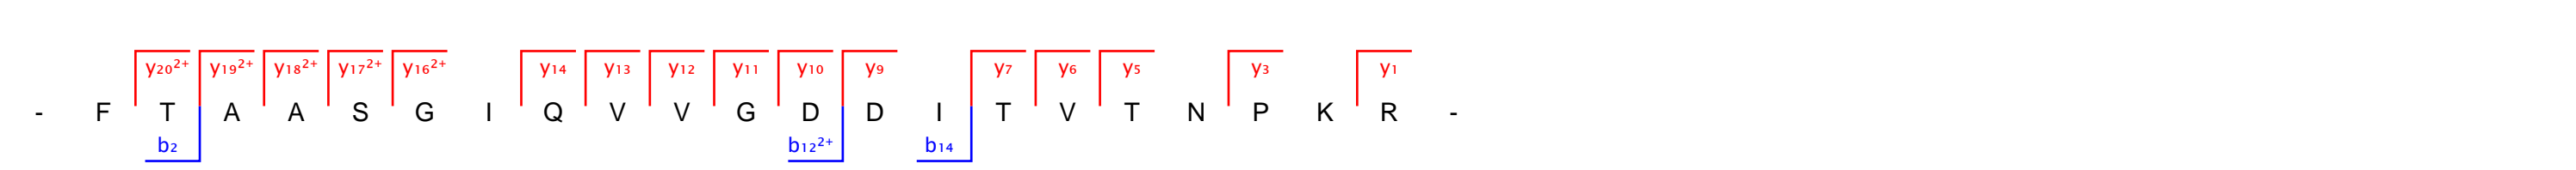

Spectral Annotation for Single-Peptide IDs between Single D11 Cells using Q-OT-LIT

Raw file 2015-01-08\_CL04\_Blastomere-15 Scan 38382 Method ITMS; HCD Score 47.11 m/z 741.69

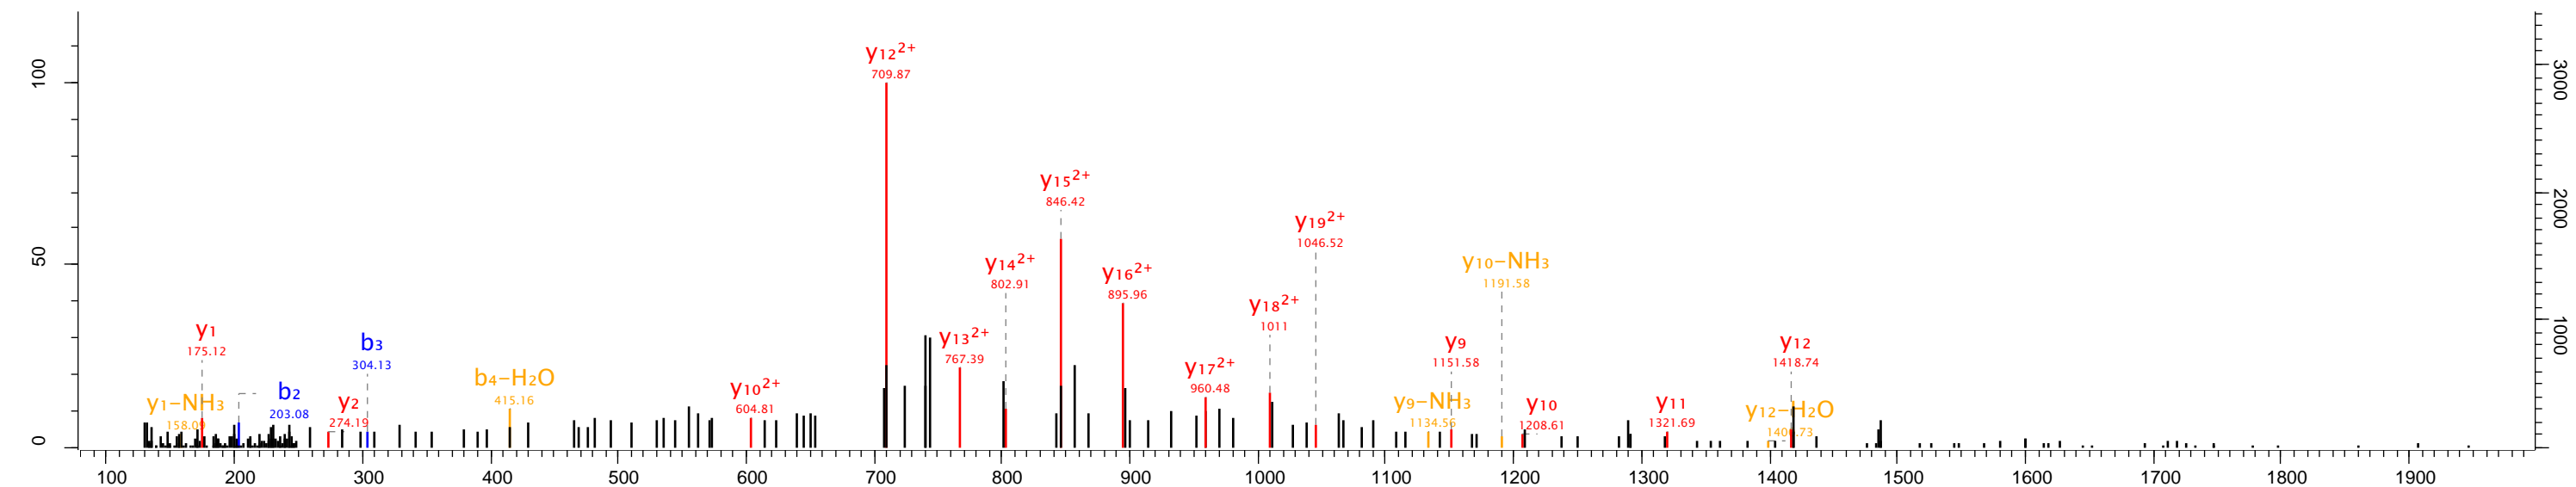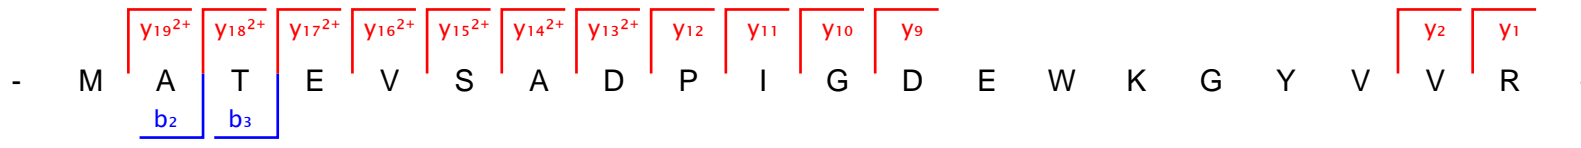

Spectral Annotation for Single-Peptide IDs between Single D11 Cells using Q-OT-LIT



Raw file 2015-01-08\_CL04\_Blastomere-15 Scan 38384 Method ITMS; HCD Score 51.98 m/z 756.9

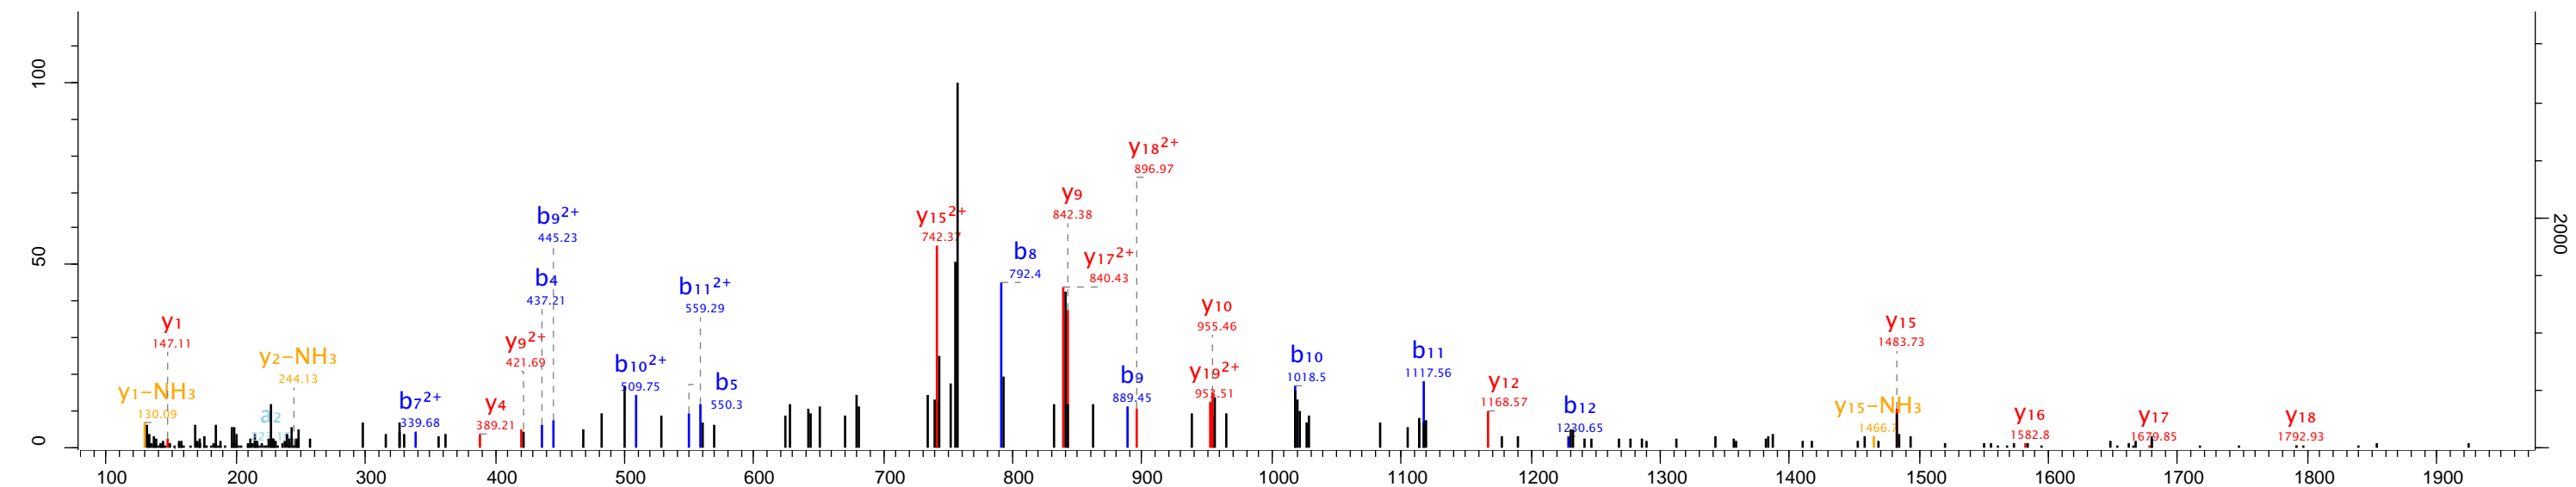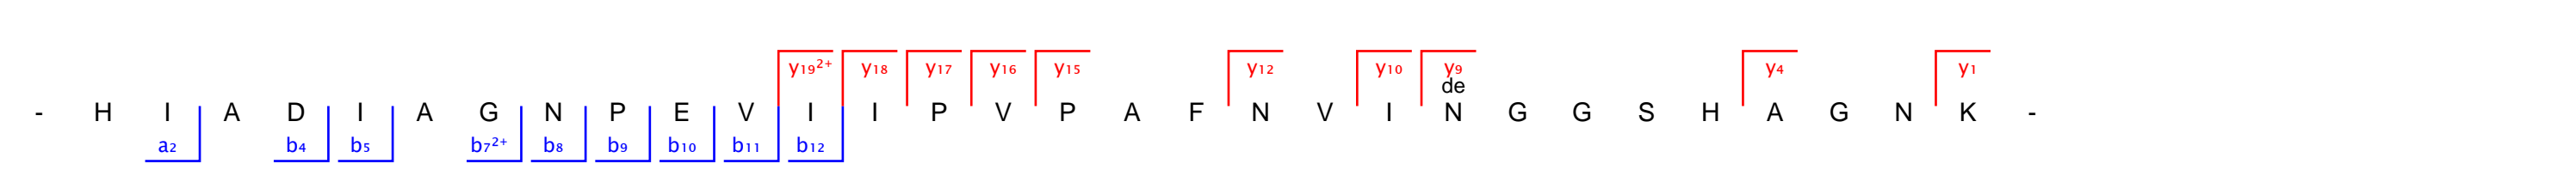

Spectral Annotation for Single-Peptide IDs between Single D11 Cells using Q-OT-LIT

Raw file 2015-01-08\_CL04\_Blastomere-15 Scan 38431 Method ITMS; HCD Score 47.08 m/z 742.03

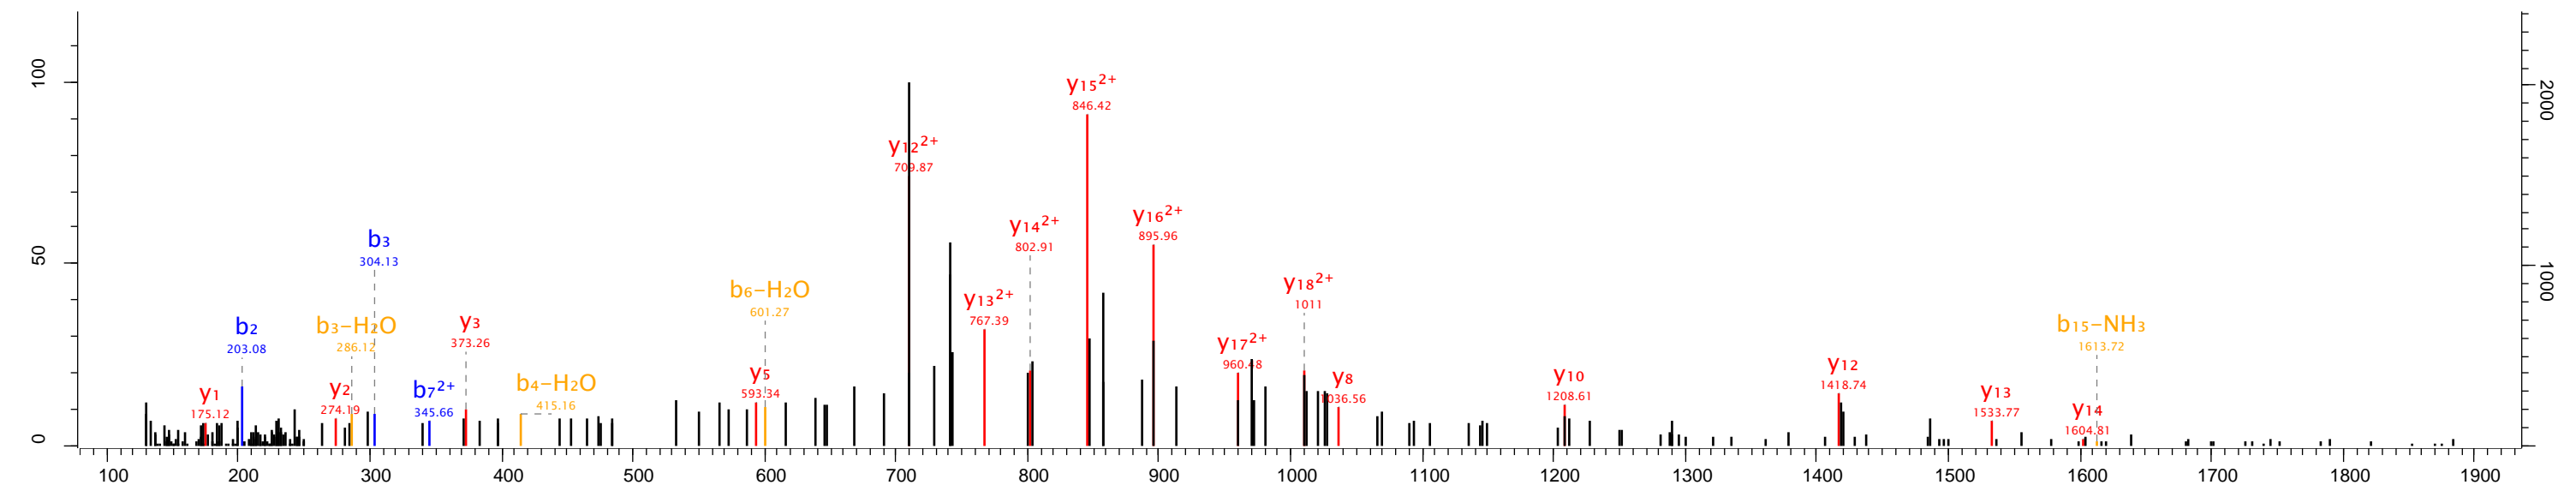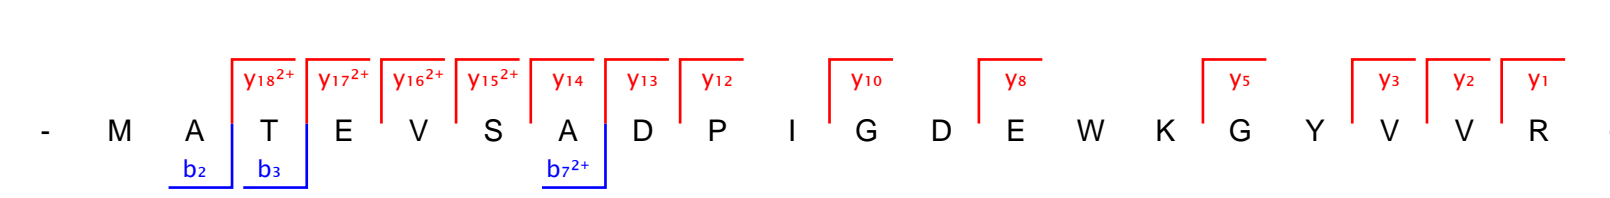

Spectral Annotation for Single-Peptide IDs between Single D11 Cells using Q-OT-LIT

Raw file 2015-01-08\_CL04\_Blastomere-15 Scan 38507 Method ITMS; HCD Score 48.09 m/z 572.36

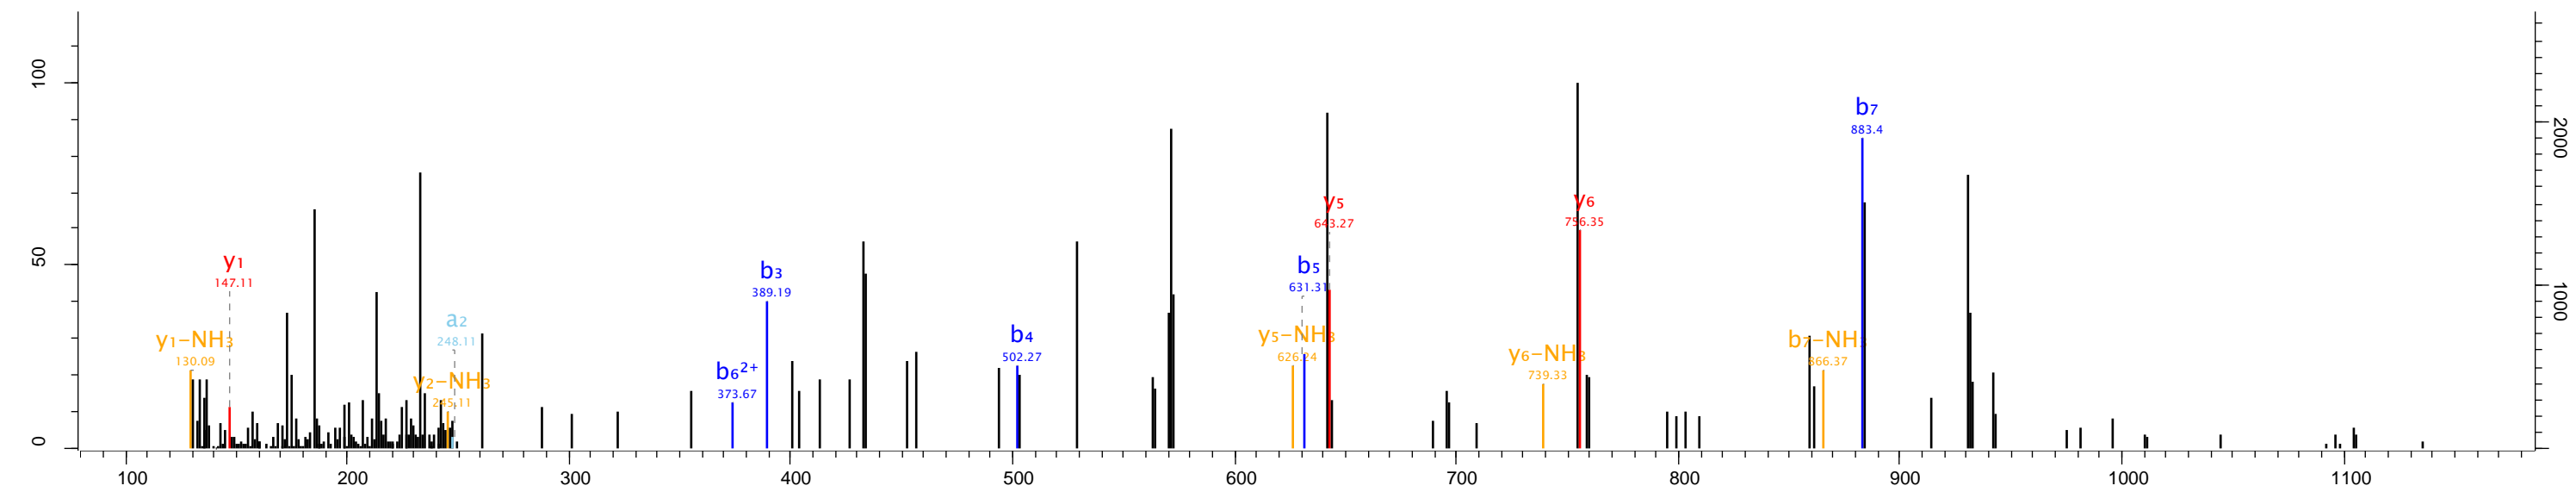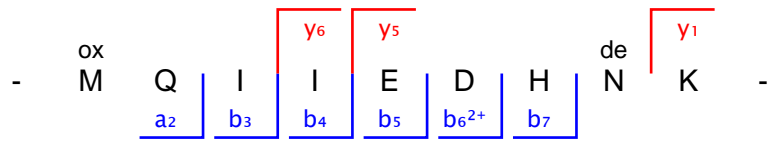

Spectral Annotation for Single-Peptide IDs between Single D11 Cells using Q-OT-LIT

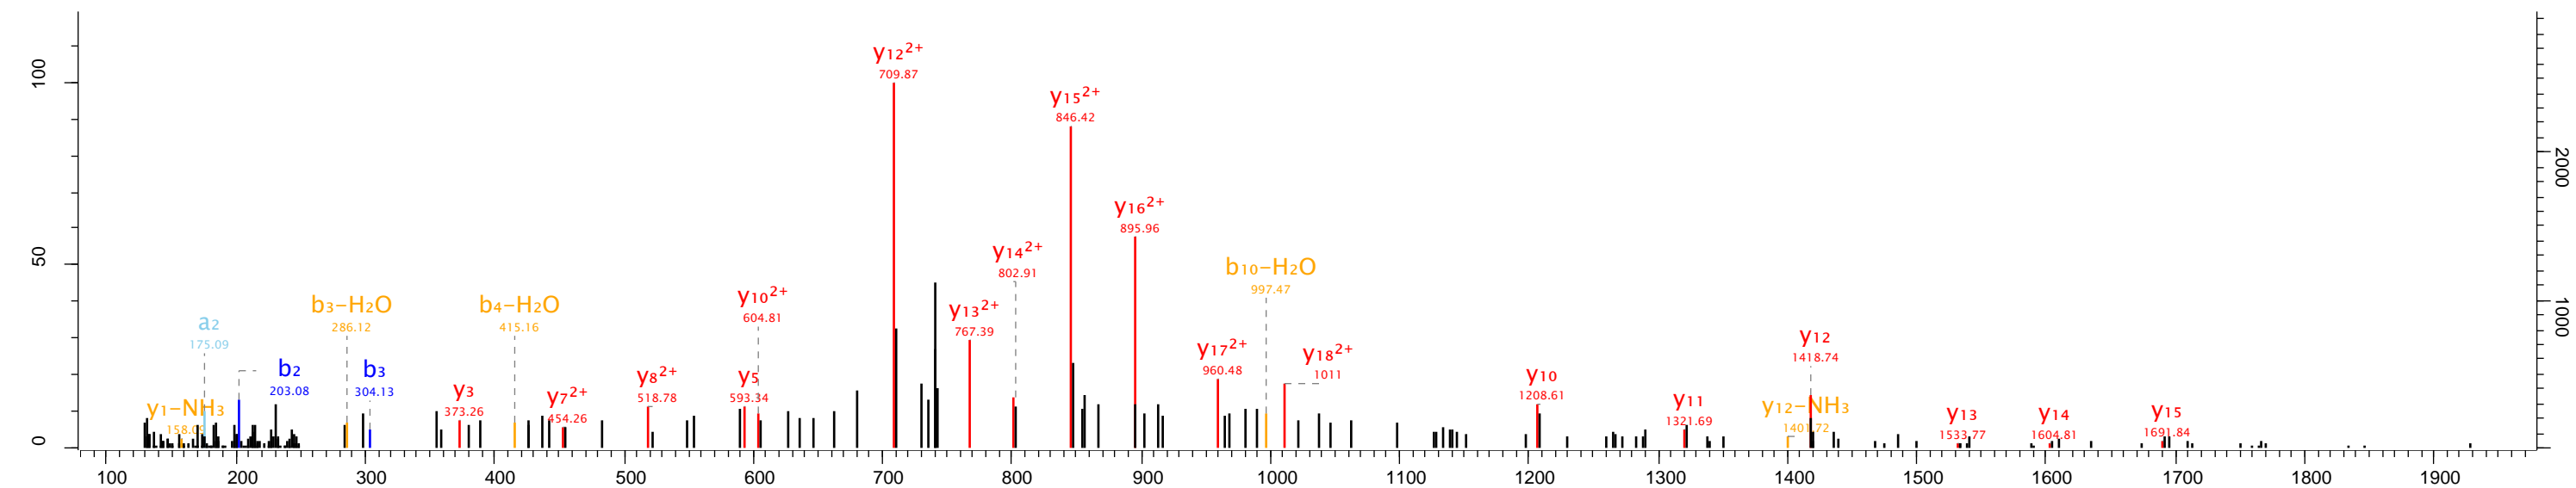

- M A T E V S A D P I G D E W K G Y V V R -

Fragmentation sites are indicated by red brackets above the sequence, corresponding to the labeled peaks in the mass spectrum. Blue brackets below the sequence indicate the b<sub>2</sub> and b<sub>3</sub> ions.

Raw file 2015-01-08\_CL04\_Blastomere-15 Scan 38642 Method ITMS; HCD Score 62.73 m/z 624.84

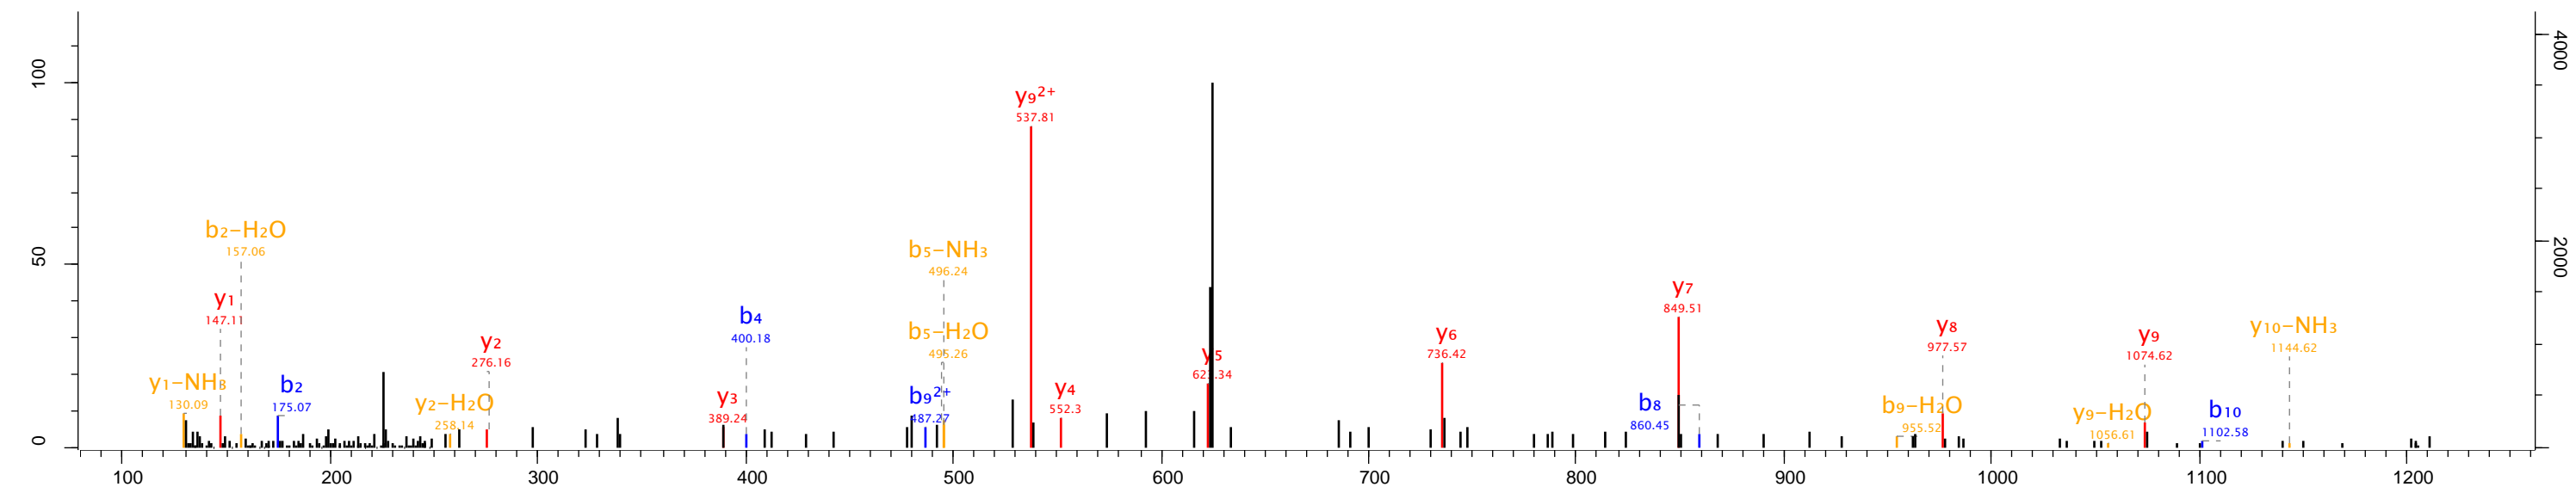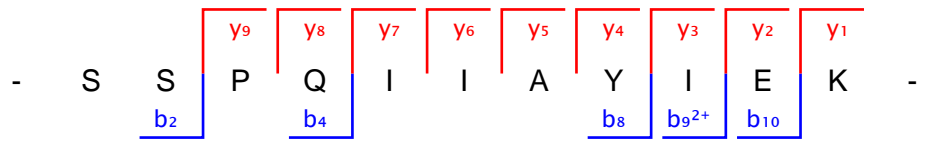

Spectral Annotation for Single-Peptide IDs between Single D11 Cells using Q-OT-LIT

Raw file 2015-01-08\_CL04\_Blastomere-15 Scan 38664 Method ITMS; HCD Score 88.34 m/z 624.84

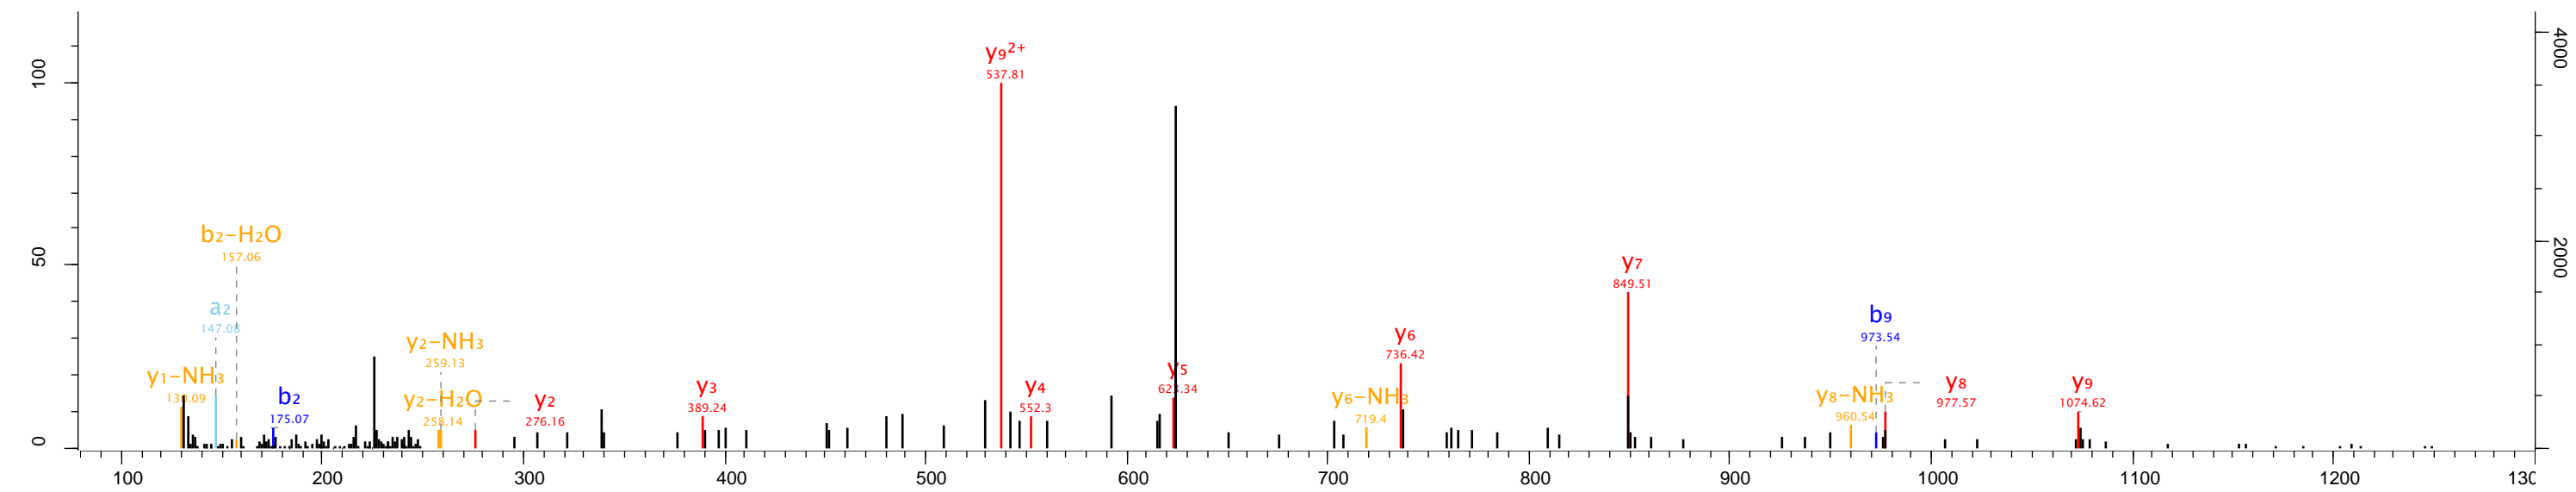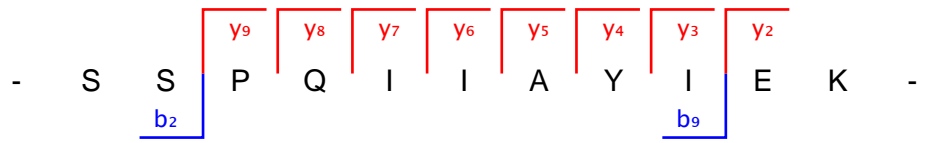

Spectral Annotation for Single-Peptide IDs between Single D11 Cells using Q-OT-LIT

Raw file 2015-01-08\_CL04\_Blastomere-15 Scan 38762 Method ITMS; HCD Score 45.47 m/z 730.39

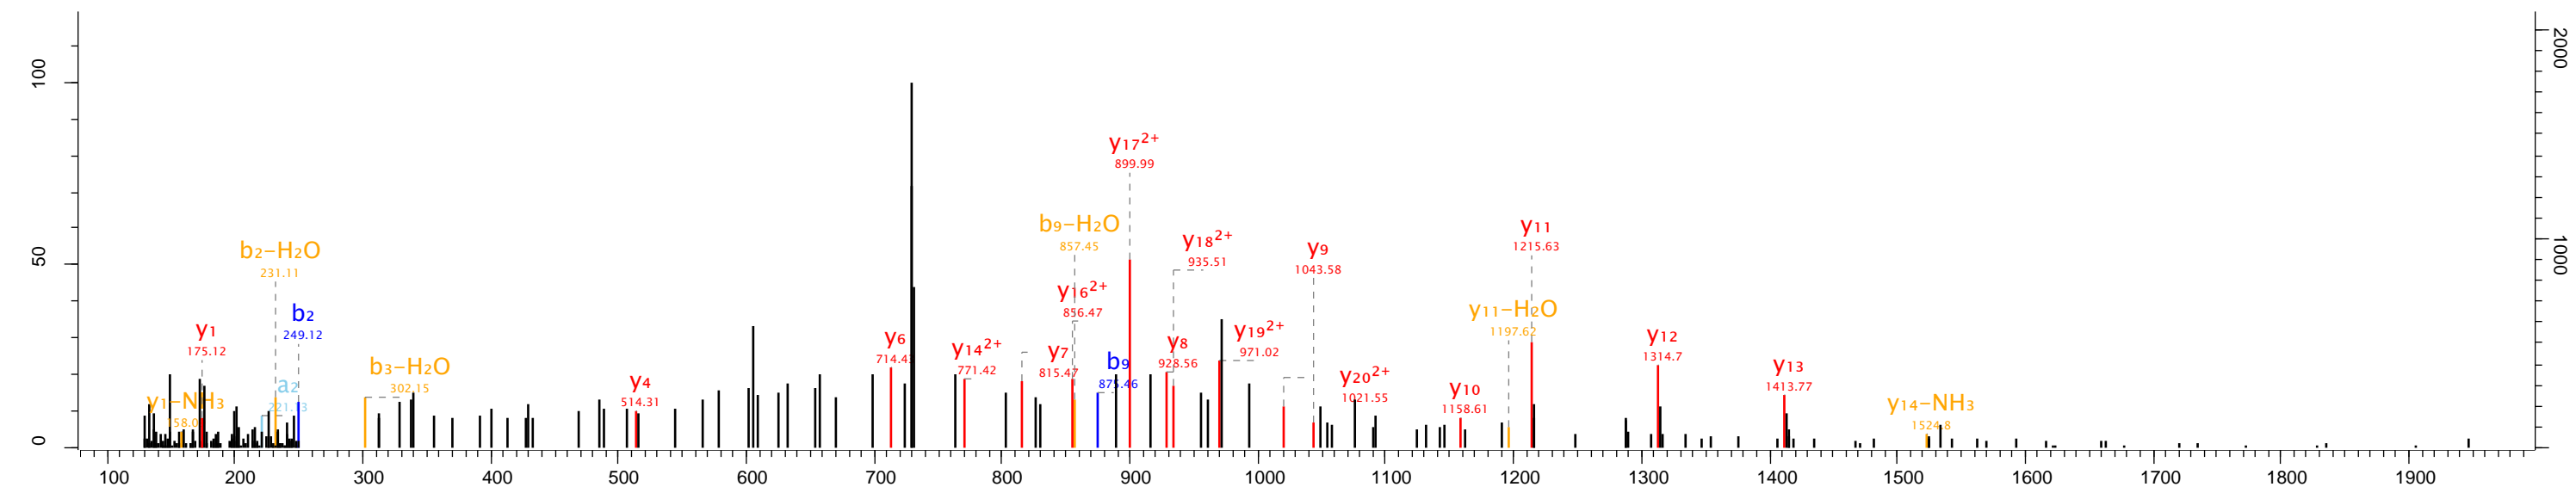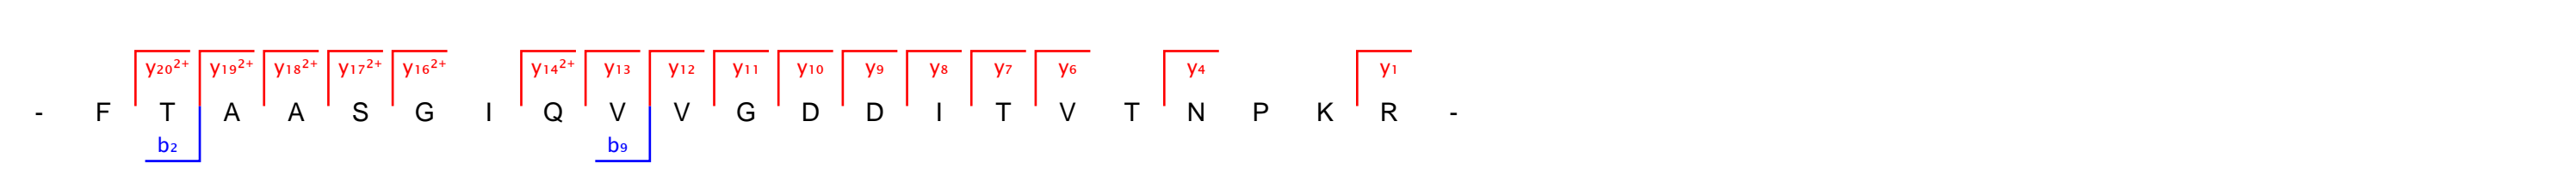

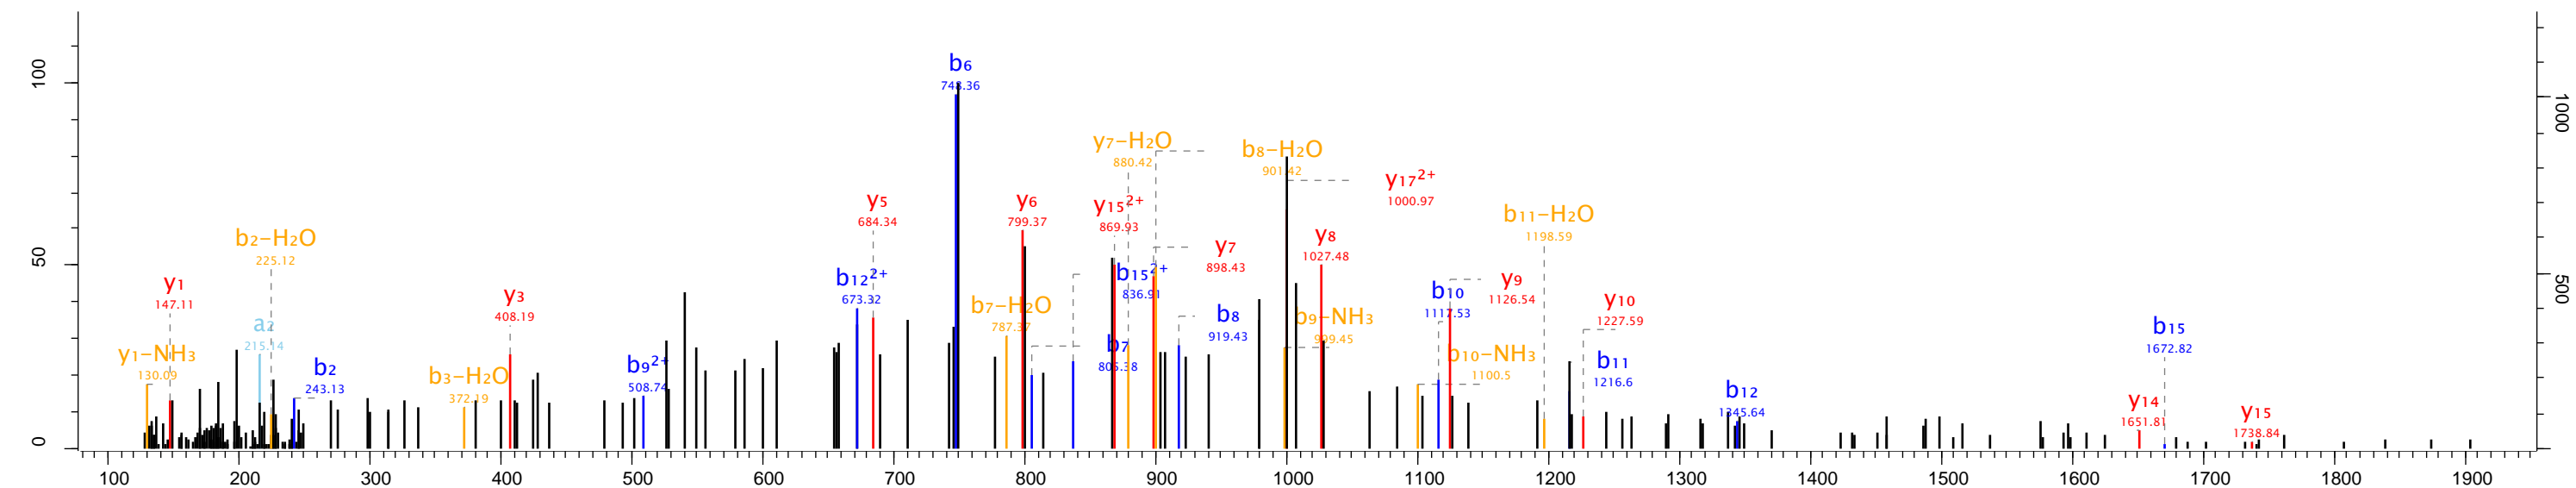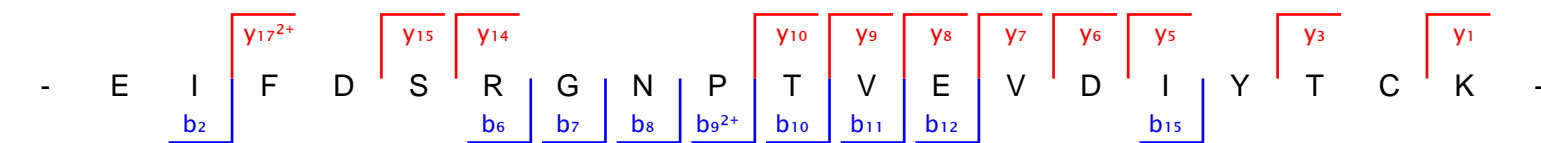



Raw file 2015-01-08\_CL04\_Blastomere-15 Scan 38784 Method ITMS; HCD Score 56.55 m/z 730.72

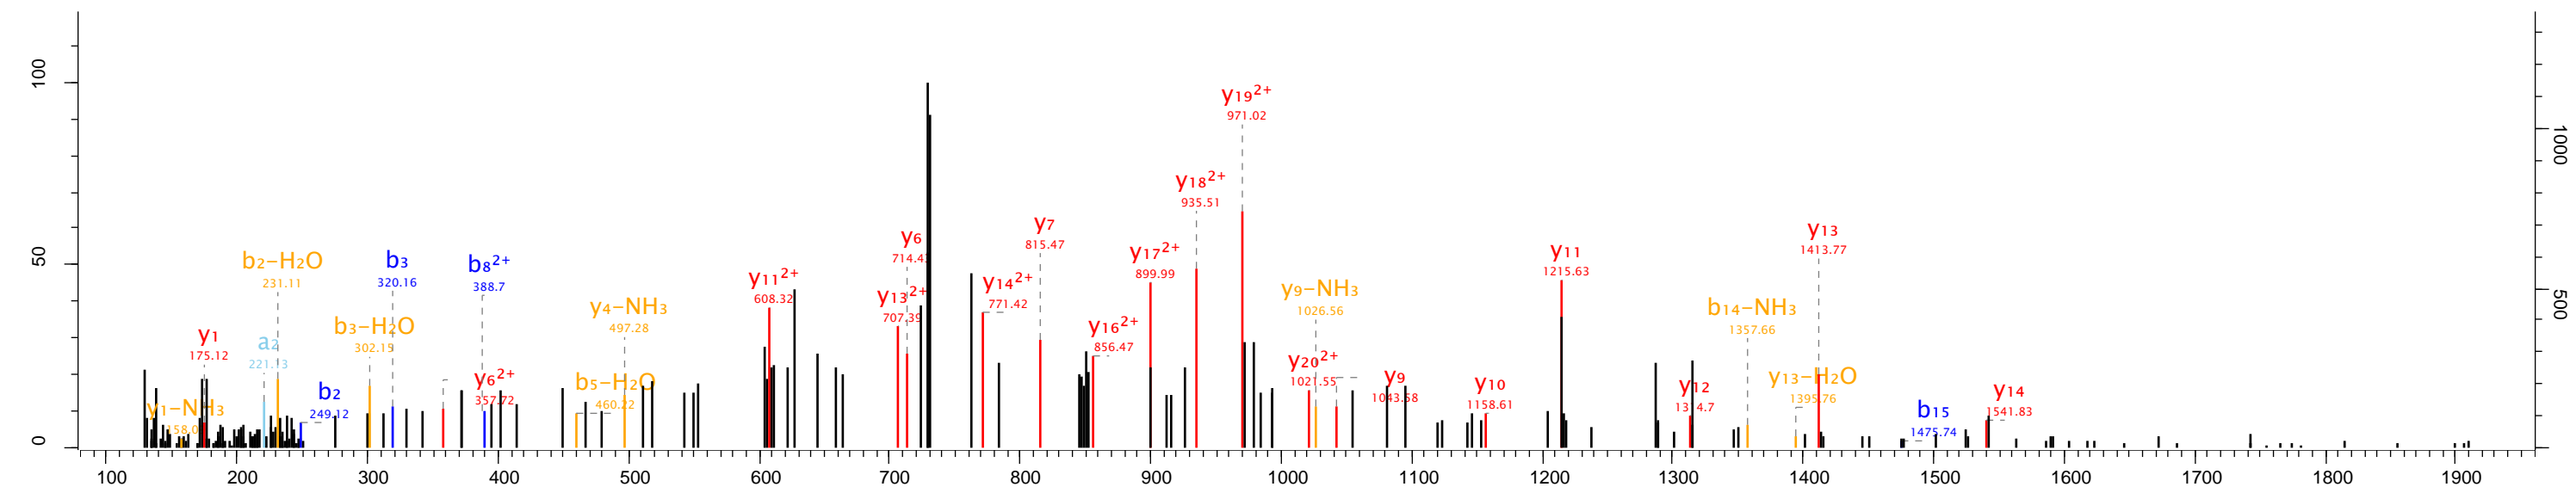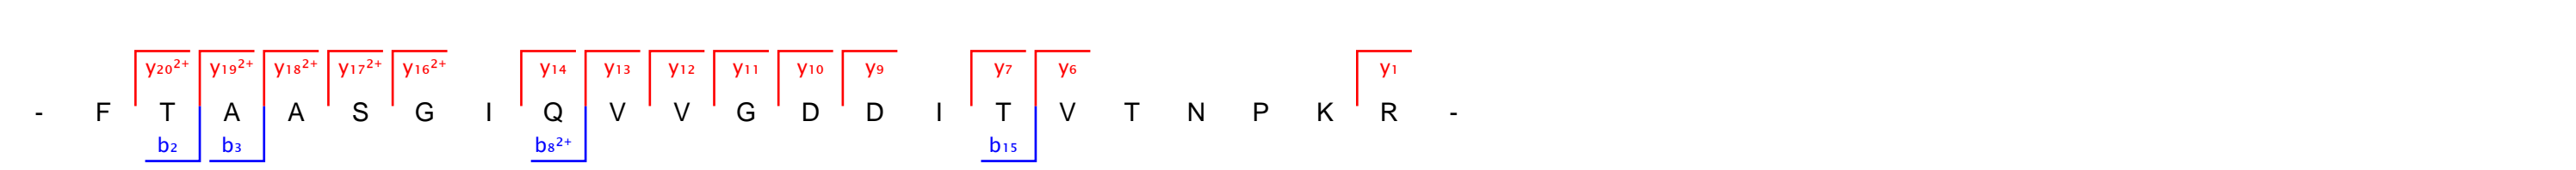

Spectral Annotation for Single-Peptide IDs between Single D11 Cells using Q-OT-LIT

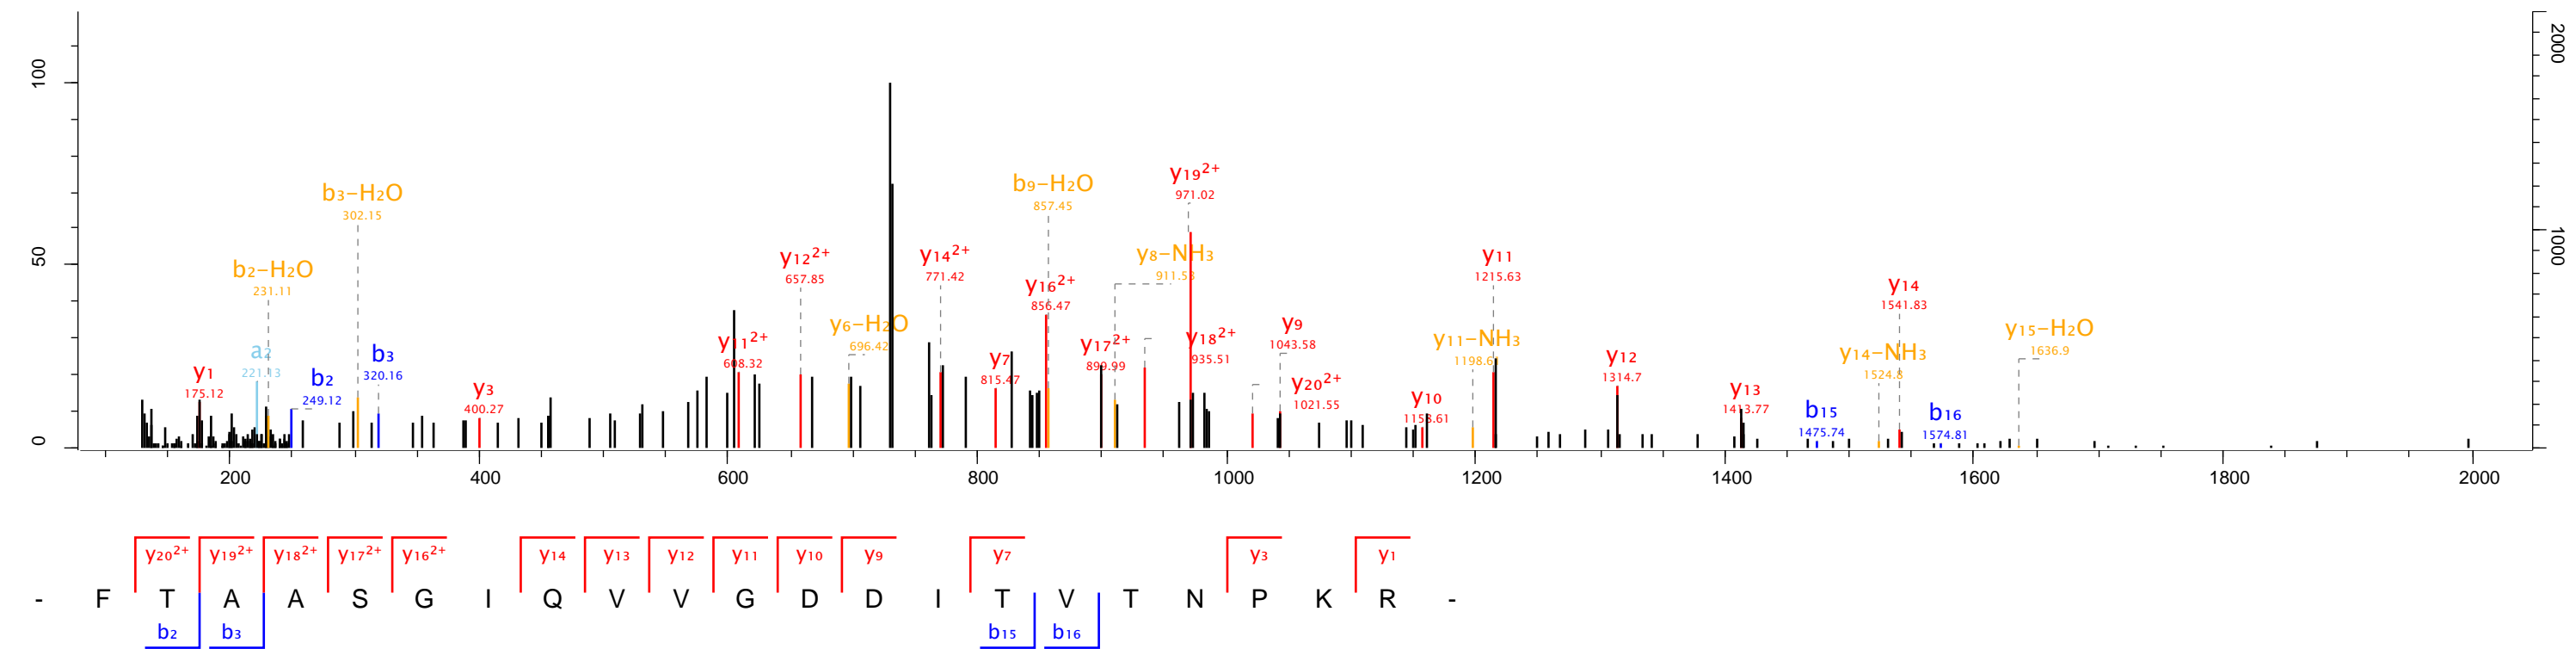

Raw file: 2015-01-08\_CL04\_Blastomere-15  
 Scan: 38824 Method: ITMS; HCD Score: 85.05 m/z: 730.39

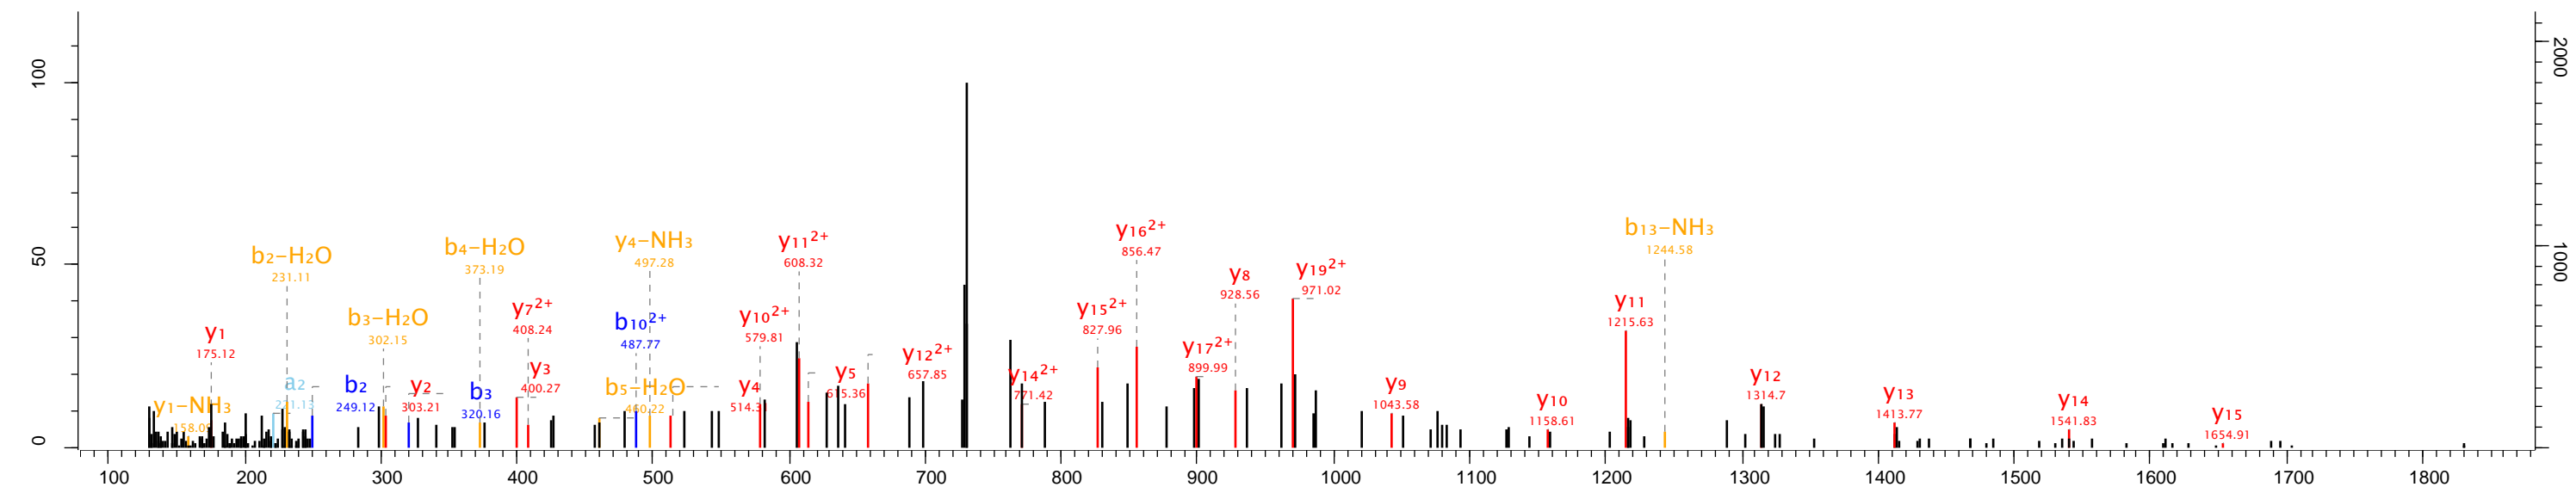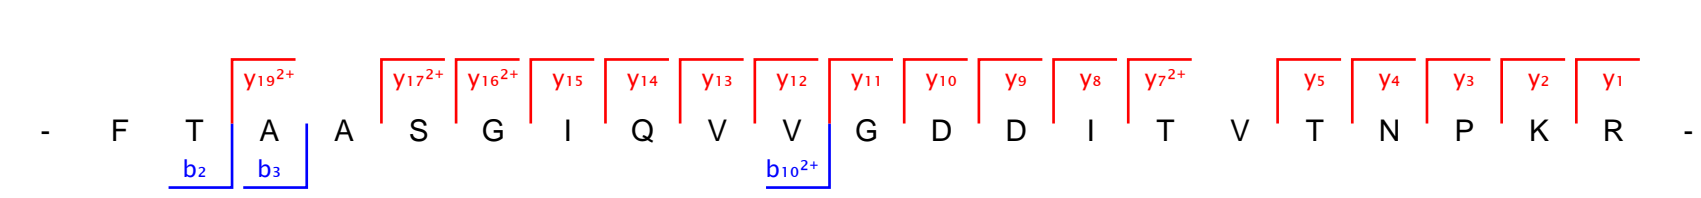

Spectral Annotation for Single-Peptide IDs between Single D11 Cells using Q-OT-LIT

Raw file 2015-01-08\_CL04\_Blastomere-15 Scan 38844 Method ITMS; HCD Score 61.76 m/z 749.02

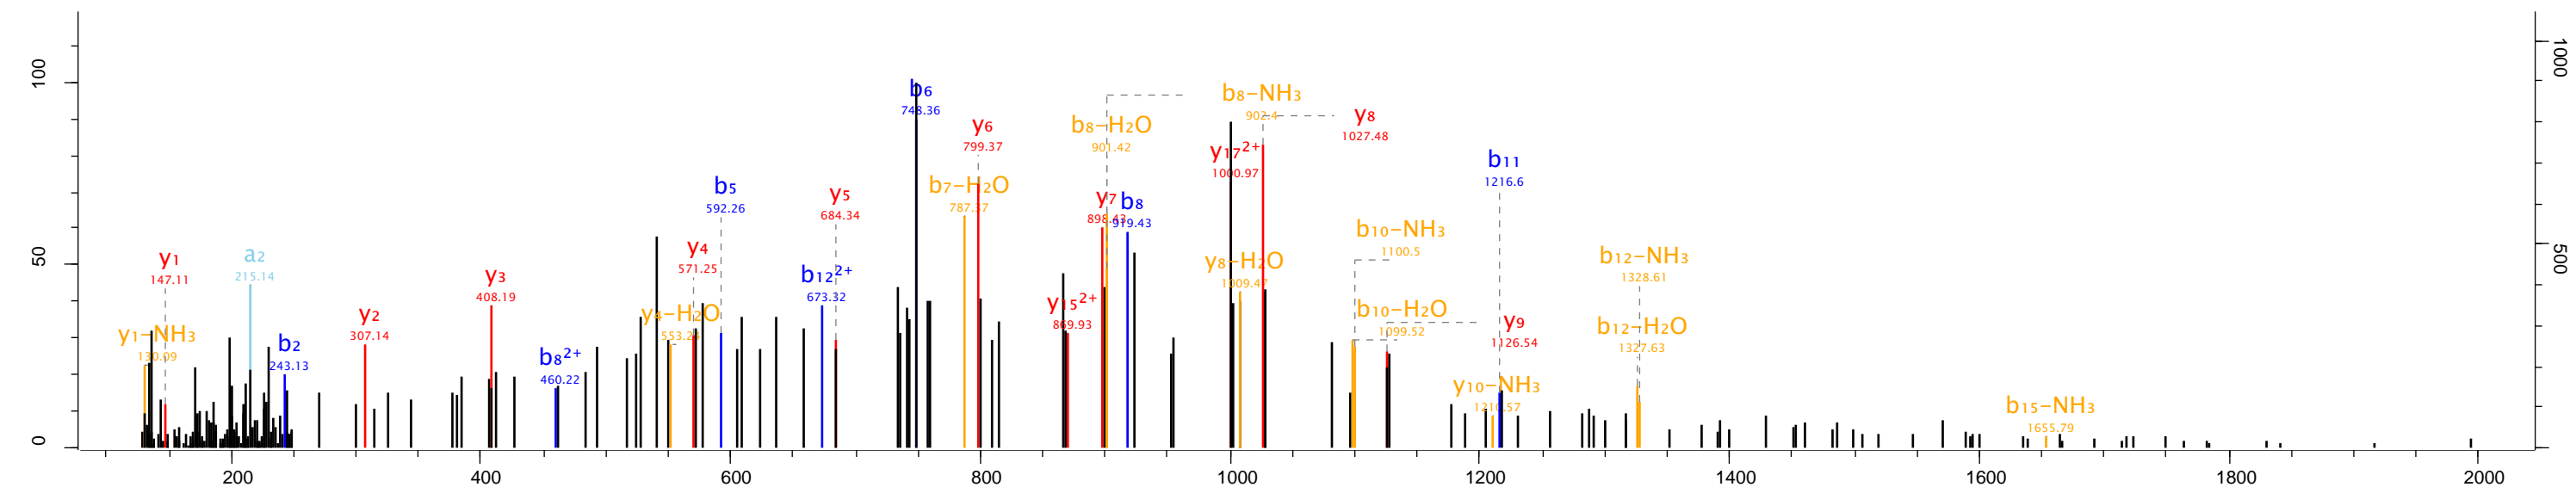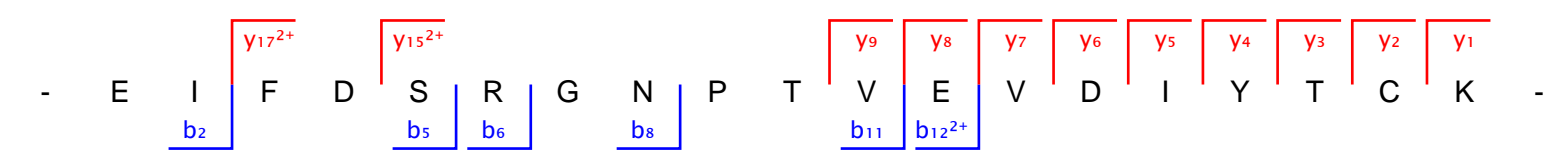

Spectral Annotation for Single-Peptide IDs between Single D11 Cells using Q-OT-LIT

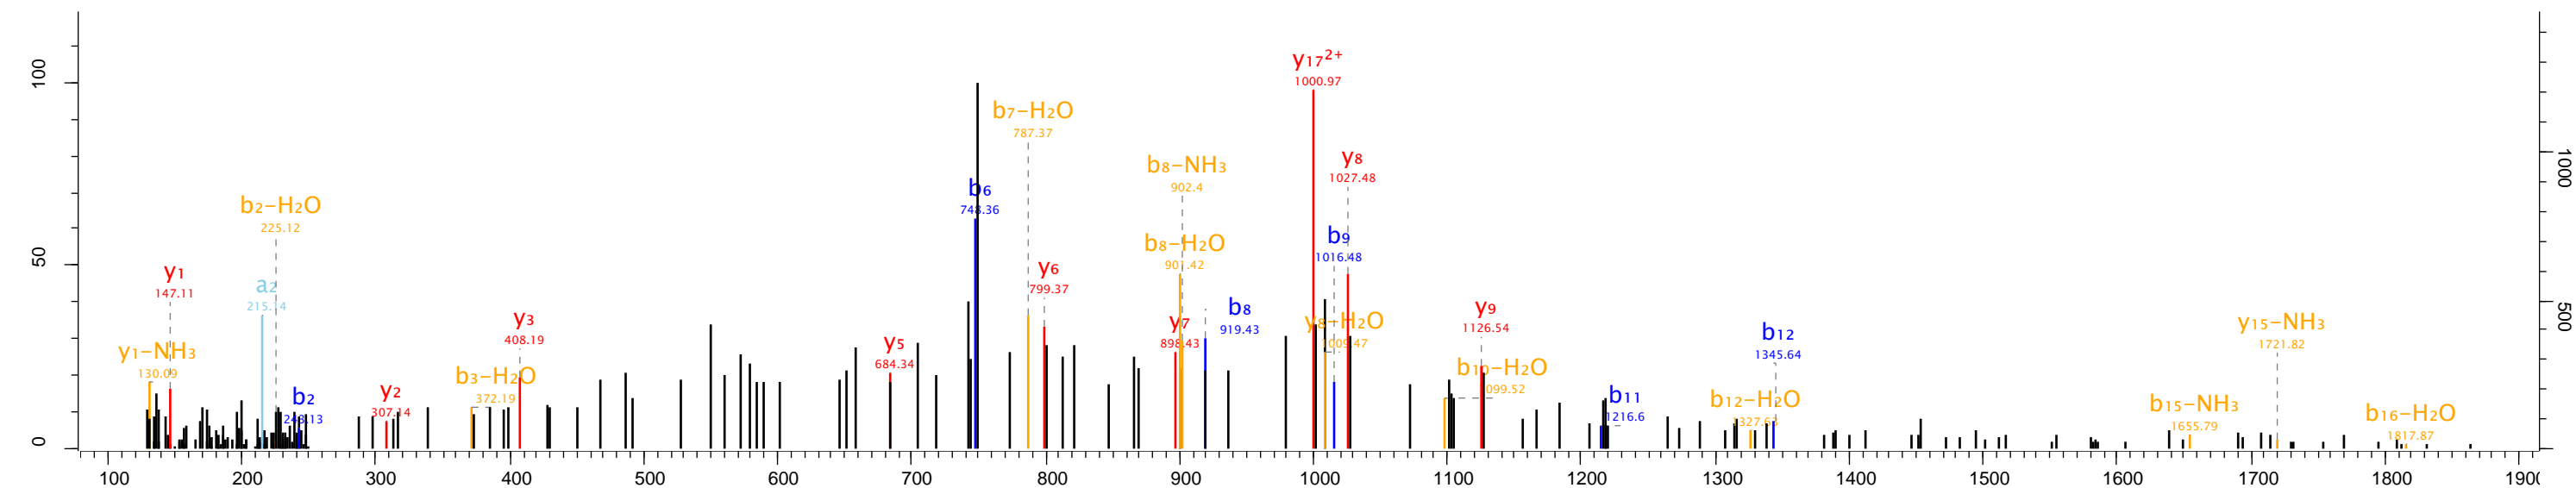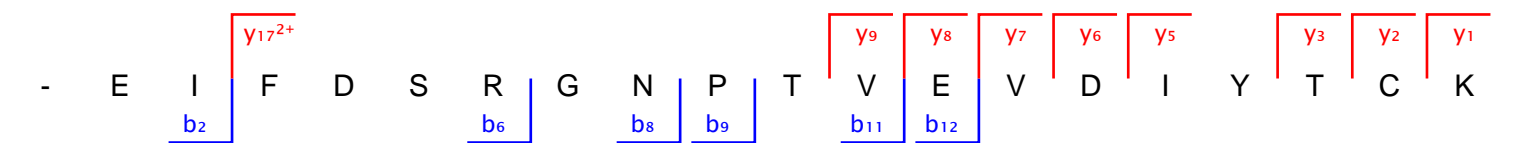

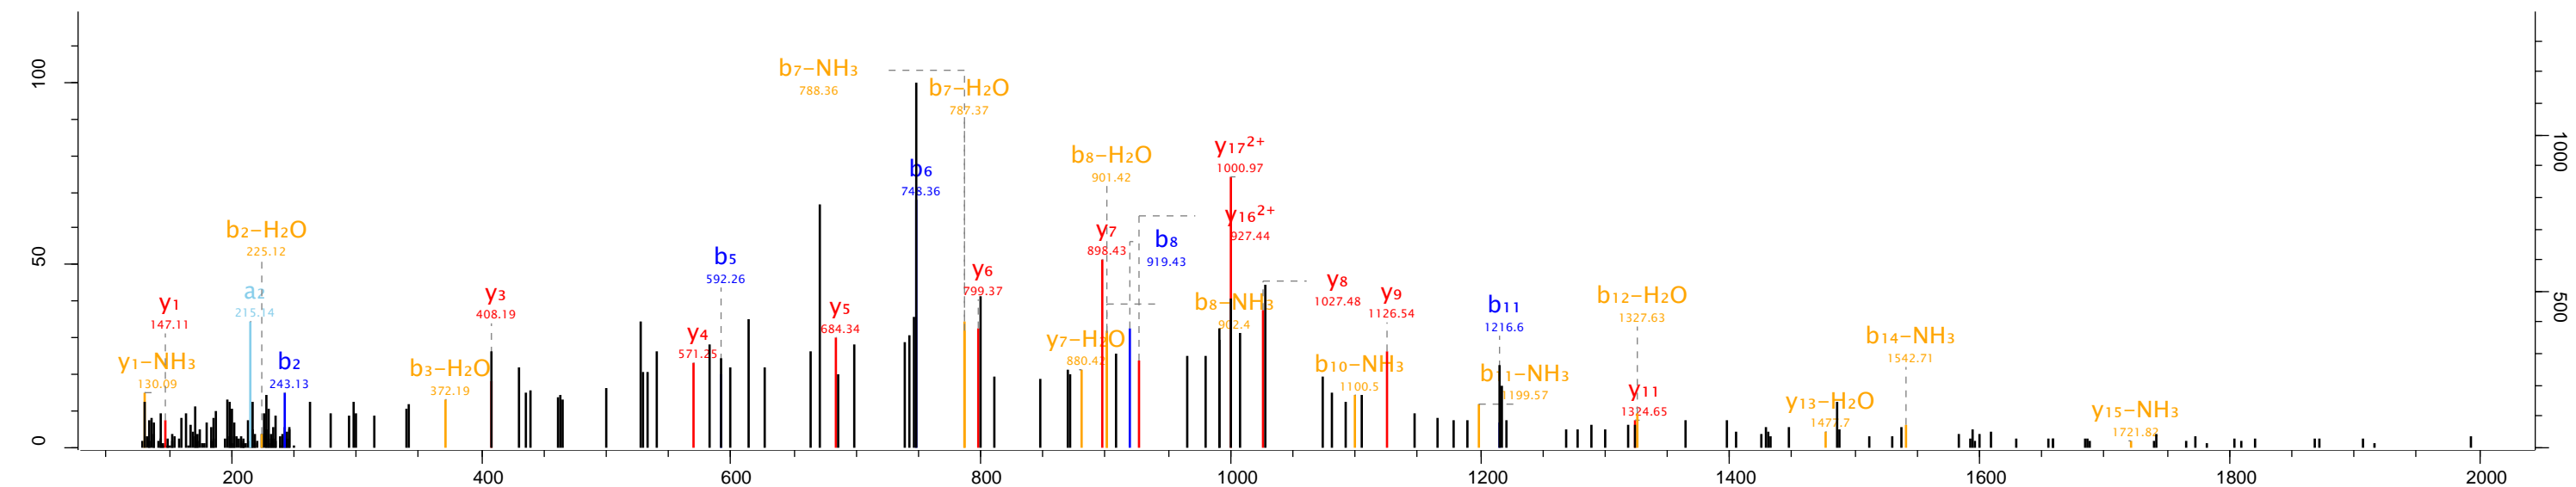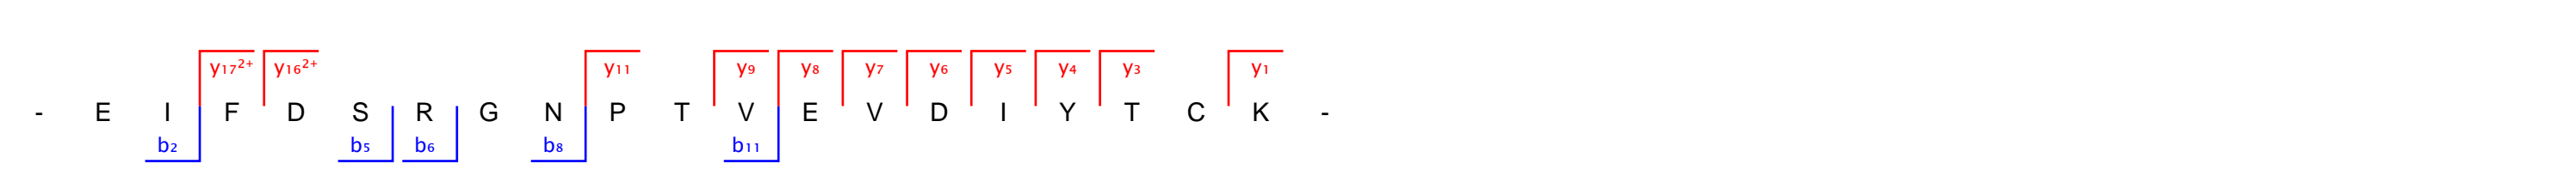

Raw file 2015-01-08\_CL04\_Blastomere-15 Scan 38911 Method ITMS; HCD Score 70.73 m/z 581.31

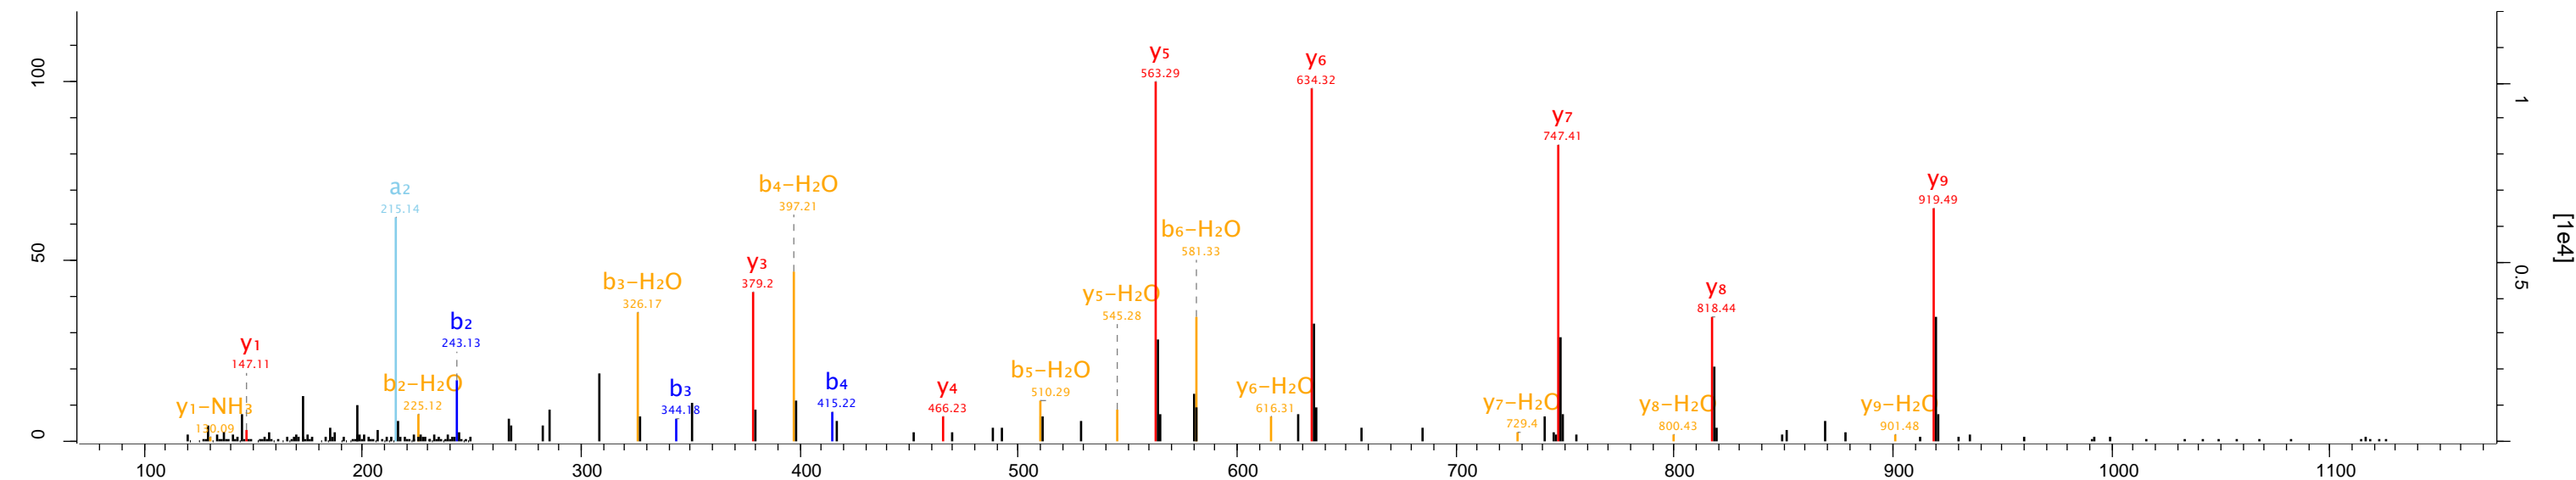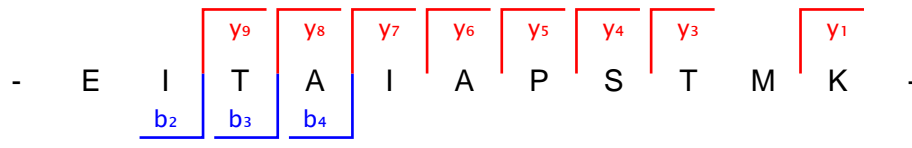

Spectral Annotation for Single-Peptide IDs between Single D11 Cells using Q-OT-LIT

Raw file 2015-01-08\_CL04\_Blastomere-15 Scan 38933 Method ITMS; HCD Score 61.24 m/z 581.31

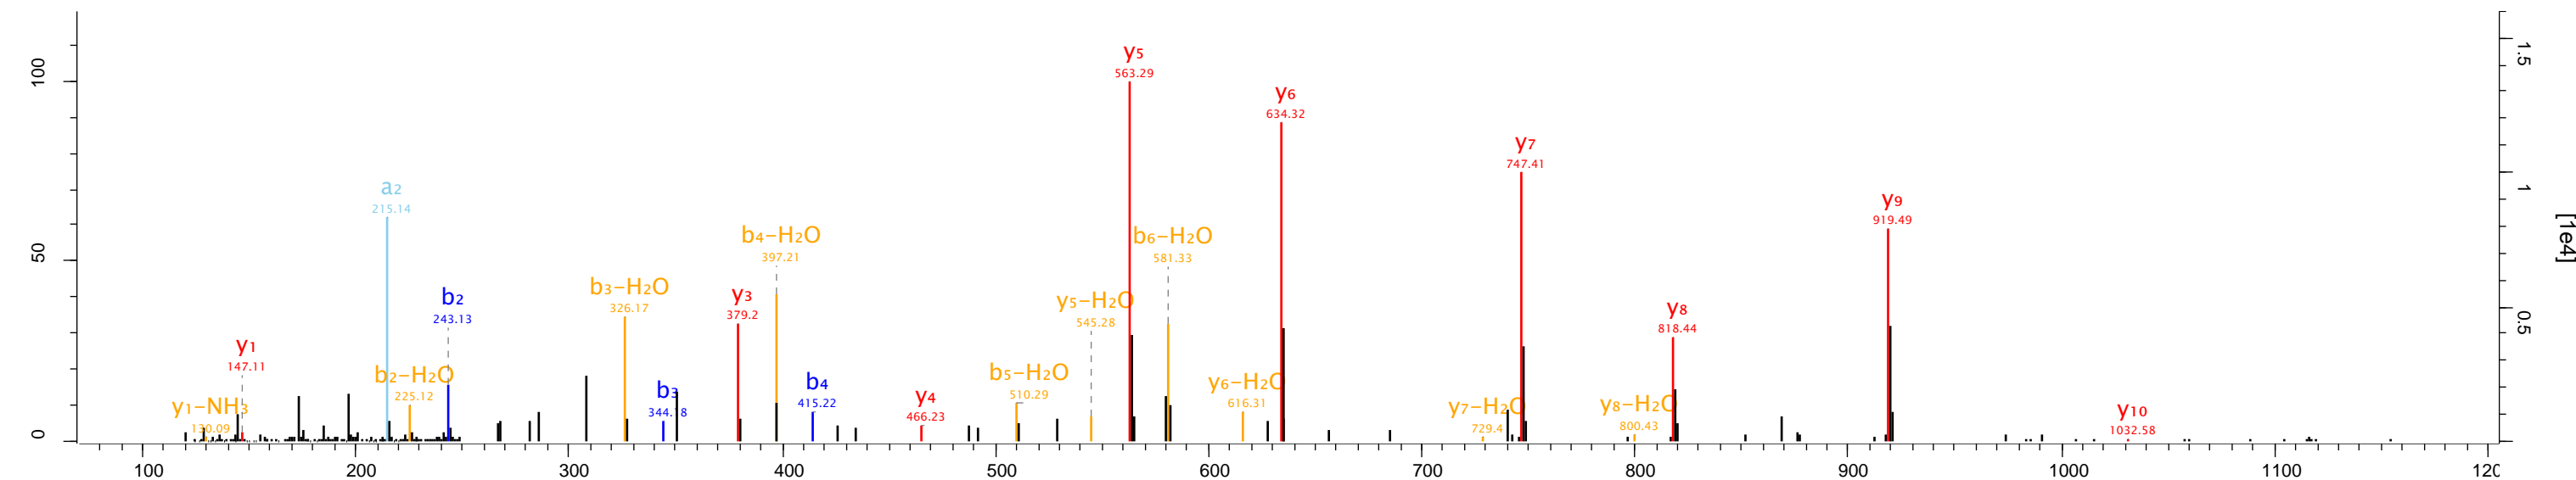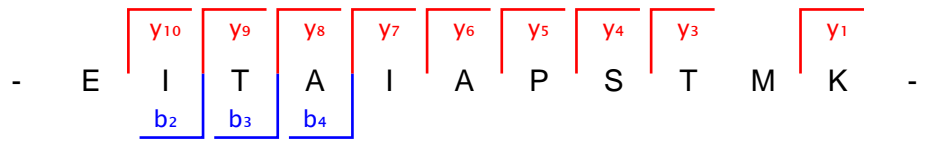

Spectral Annotation for Single-Peptide IDs between Single D11 Cells using Q-OT-LIT



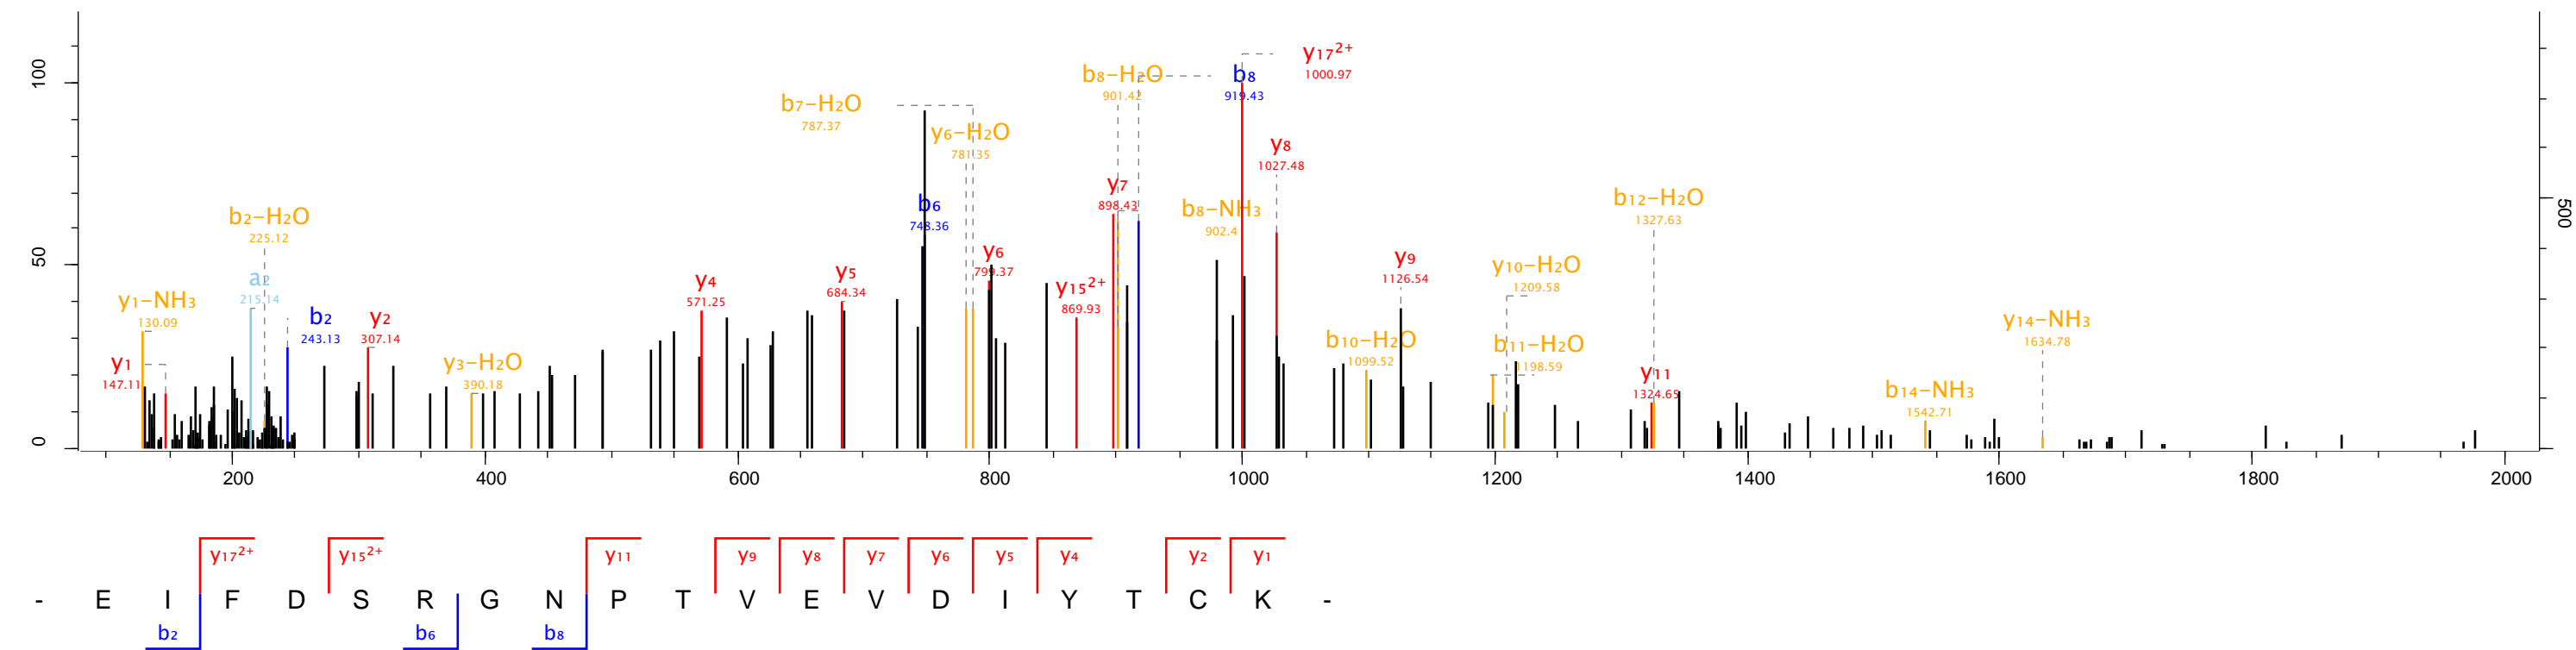

Raw file 2015-01-08\_CL04\_Blastomere-15 Scan 39087 Method ITMS; HCD Score 29.28 m/z 730.38

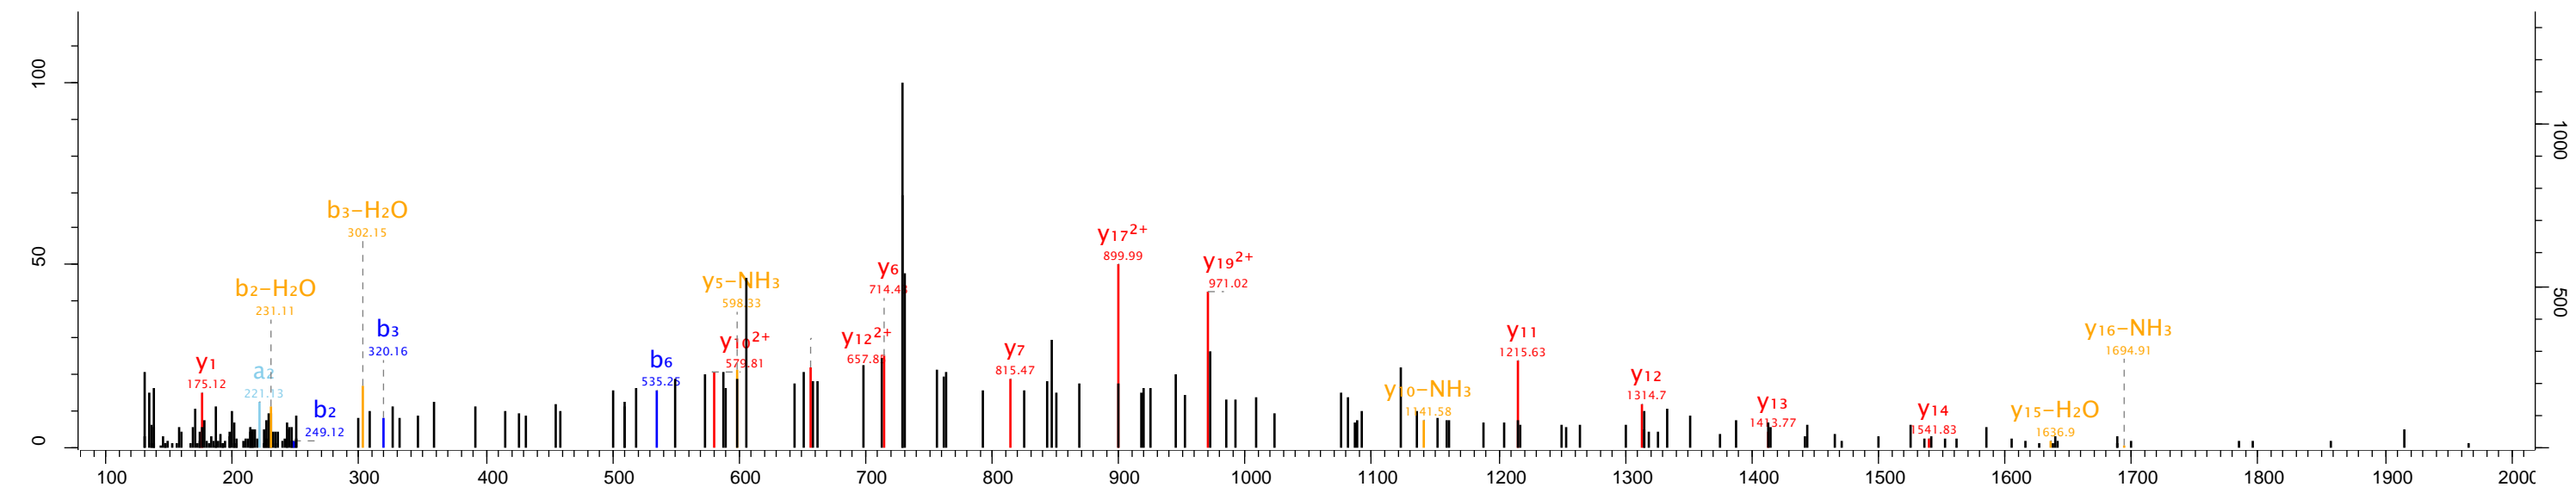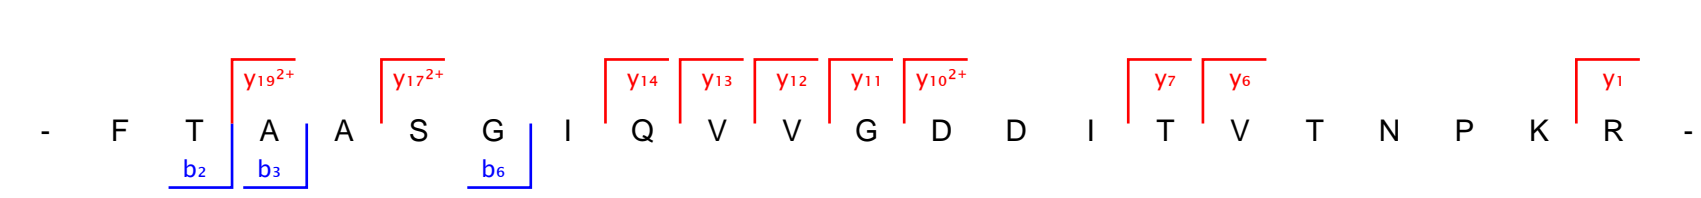

Spectral Annotation for Single-Peptide IDs between Single D11 Cells using Q-OT-LIT

Raw file 2015-01-08\_CL04\_Blastomere-15 Scan 39182 Method ITMS; HCD Score 63.09 m/z 644.83

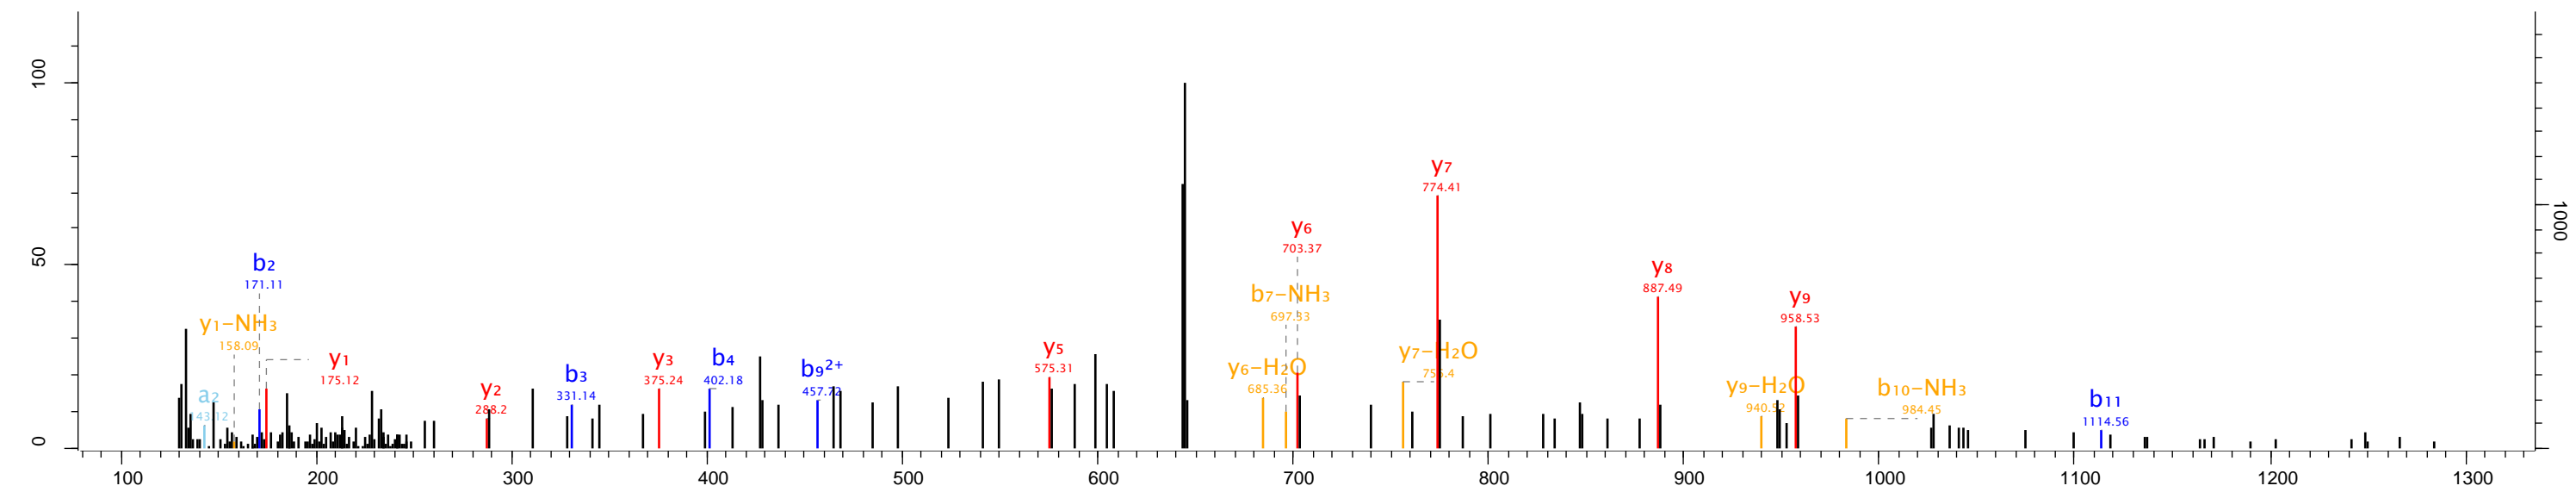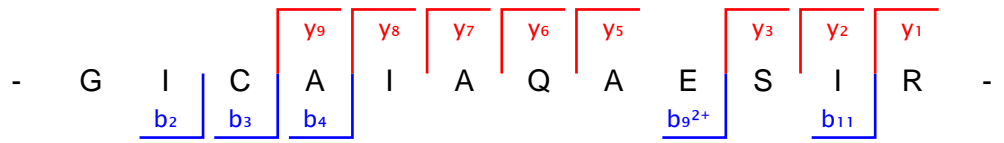

Spectral Annotation for Single-Peptide IDs between Single D11 Cells using Q-OT-LIT

Raw file 2015-01-08\_CL04\_Blastomere-15 Scan 39184 Method ITMS; HCD Score 44.86 m/z 594.8

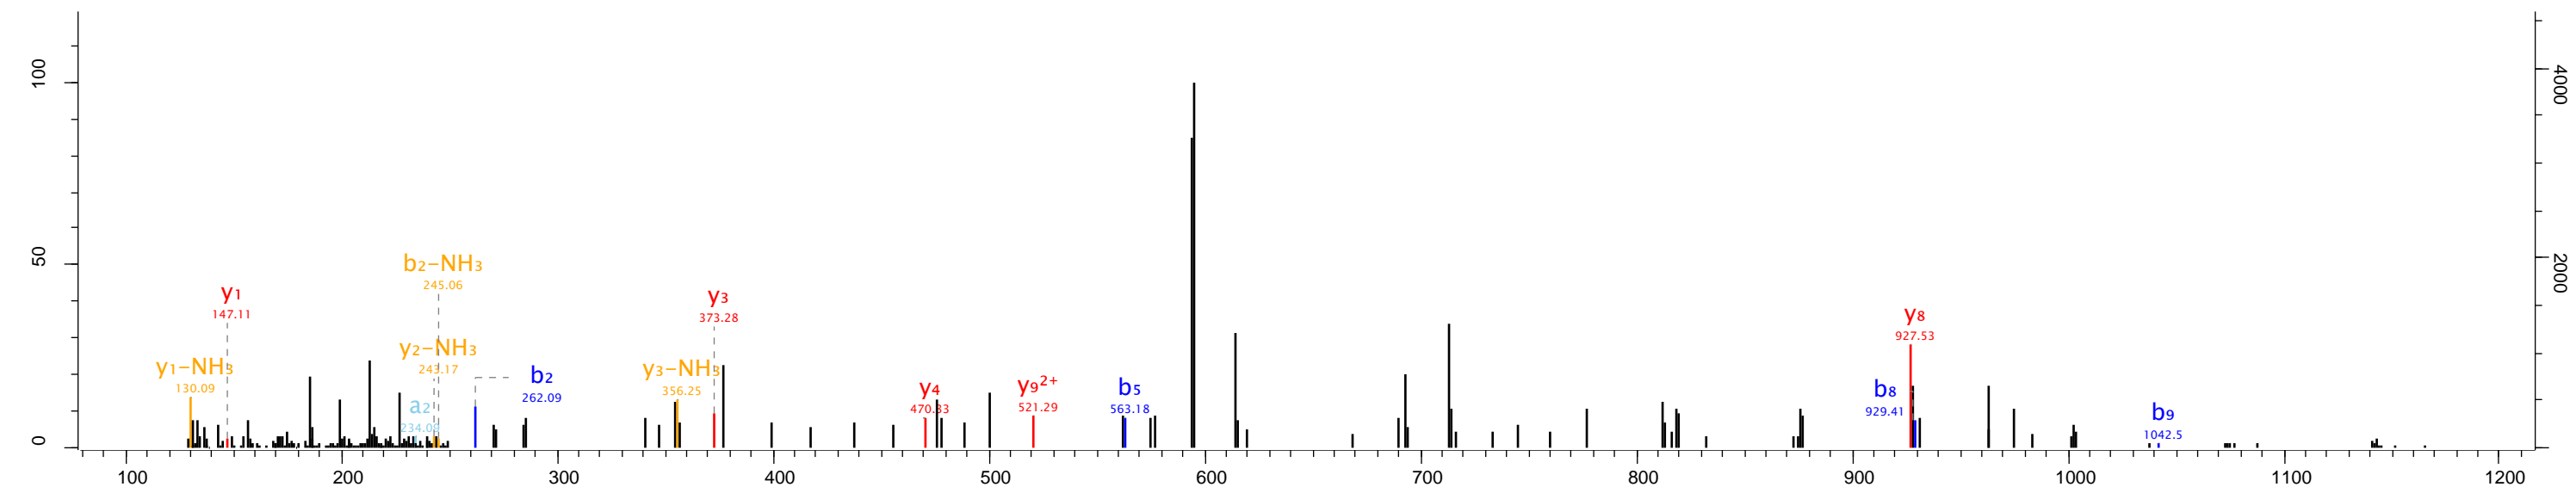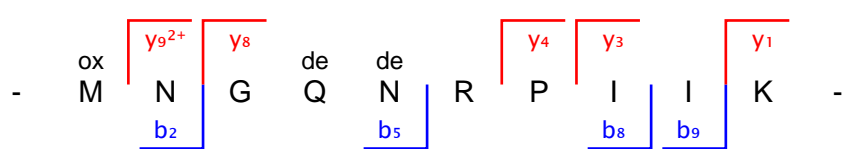

Spectral Annotation for Single-Peptide IDs between Single D11 Cells using Q-OT-LIT

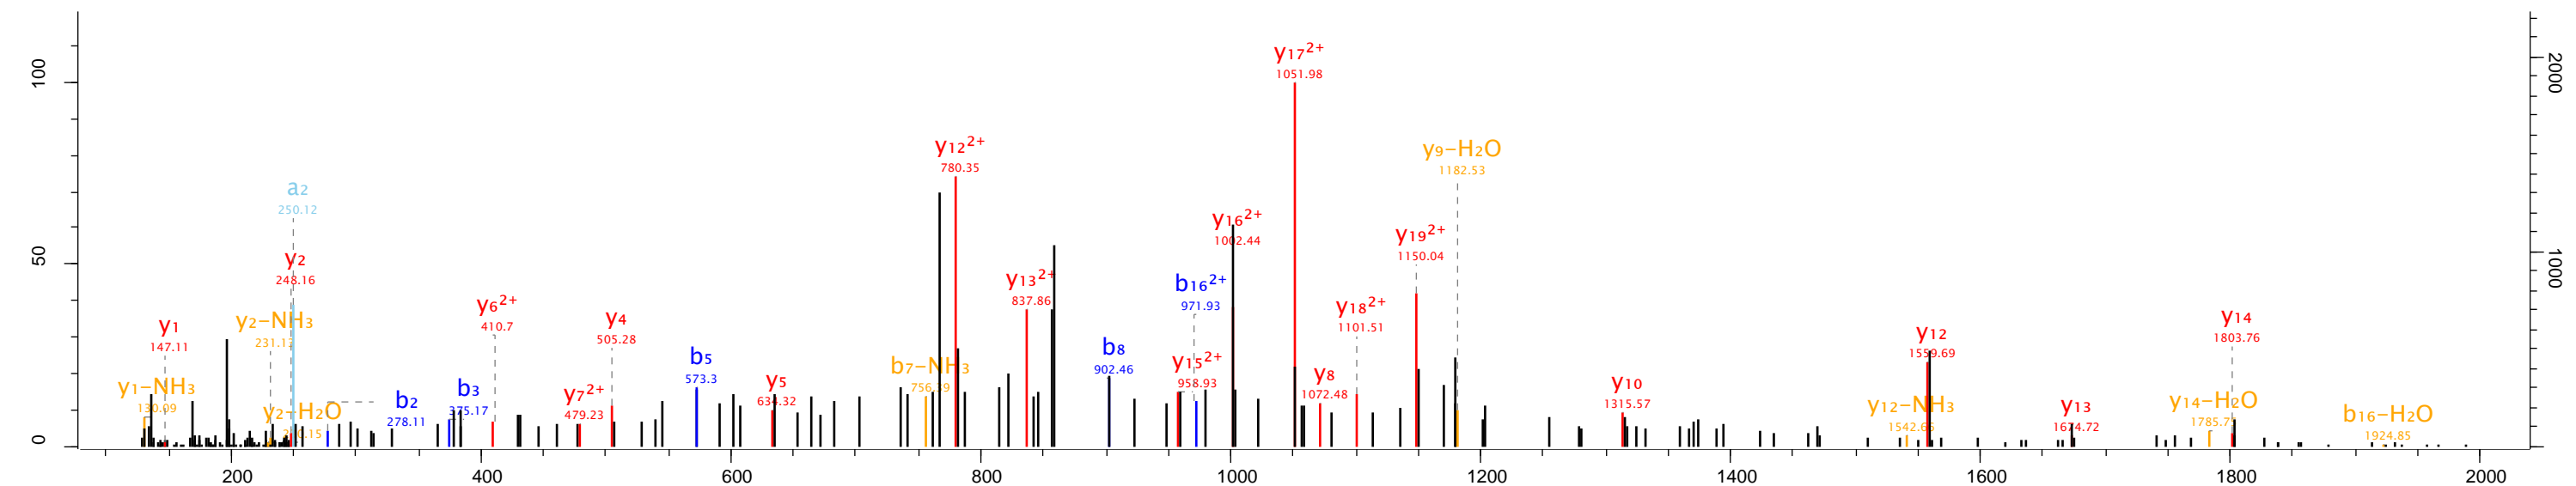

- N Y P V V S I E D P F D Q D H W E A W T K -

Fragmentation regions are indicated by brackets below the peptide sequence:

- Red brackets: y19<sup>2+</sup> (P), y18<sup>2+</sup> (V), y17<sup>2+</sup> (V), y16<sup>2+</sup> (S), y15<sup>2+</sup> (I), y14 (E), y13 (D), y12 (P), y10 (D), y8 (D), y7<sup>2+</sup> (H), y6<sup>2+</sup> (W), y5 (E), y4 (A), y2 (T), y1 (K)
- Blue brackets: b2 (Y), b3 (P), b5 (V), b8 (W)

Raw file 2015-01-08\_CL04\_Blastomere-15 Scan 39447 Method ITMS; HCD Score 58.17 m/z 581.31

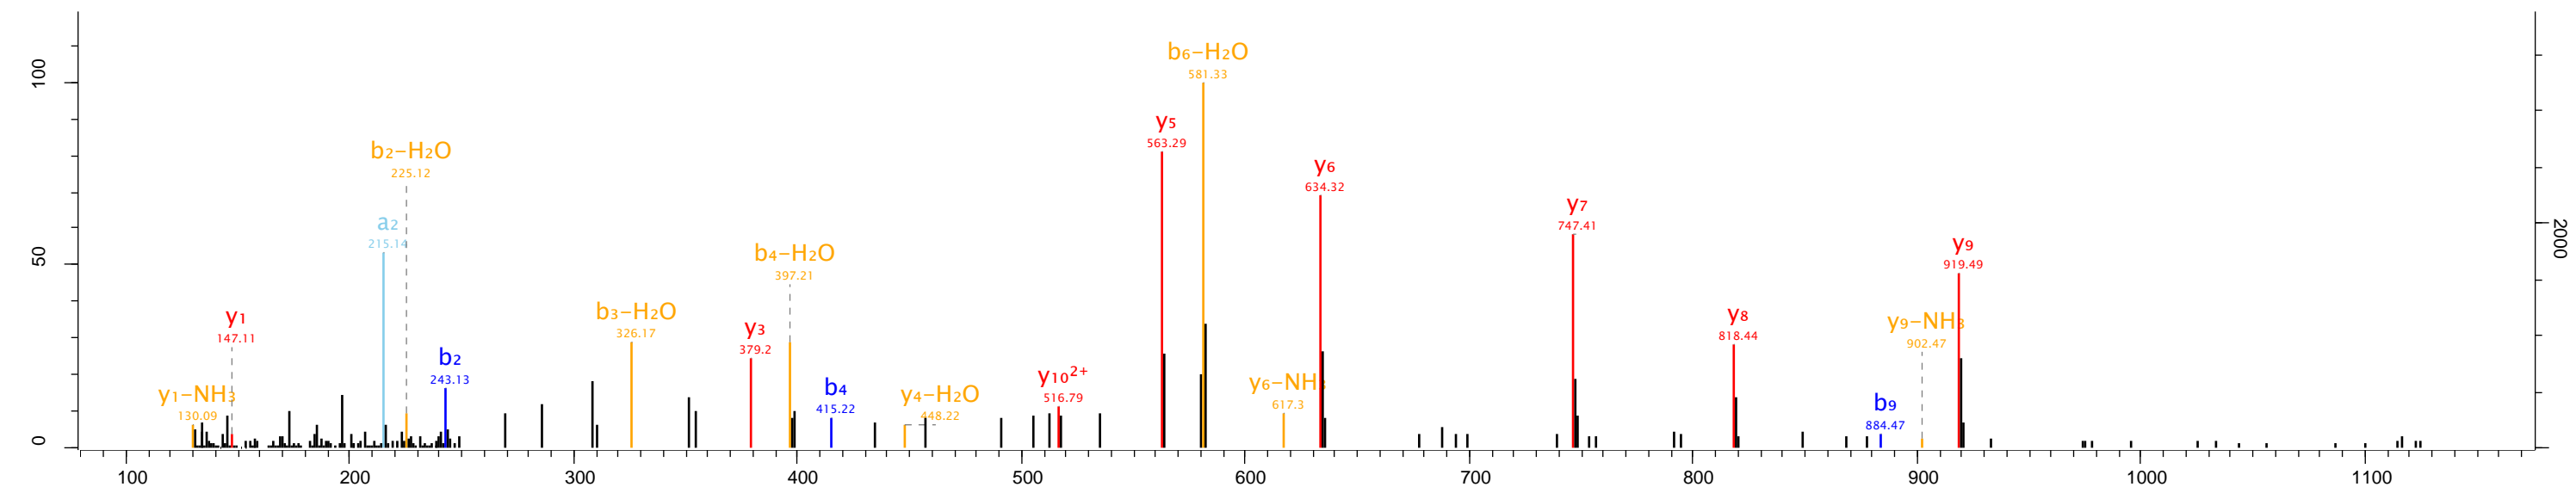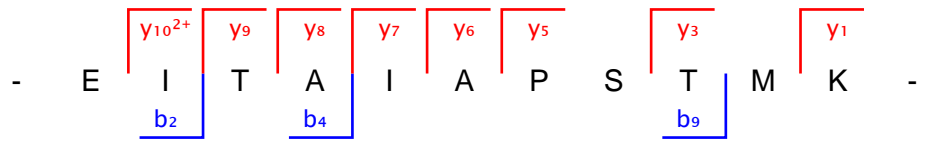

Spectral Annotation for Single-Peptide IDs between Single D11 Cells using Q-OT-LIT

Raw file 2015-01-08\_CL04\_Blastomere-15 Scan 39480 Method ITMS; HCD Score 47.22 m/z 748.36

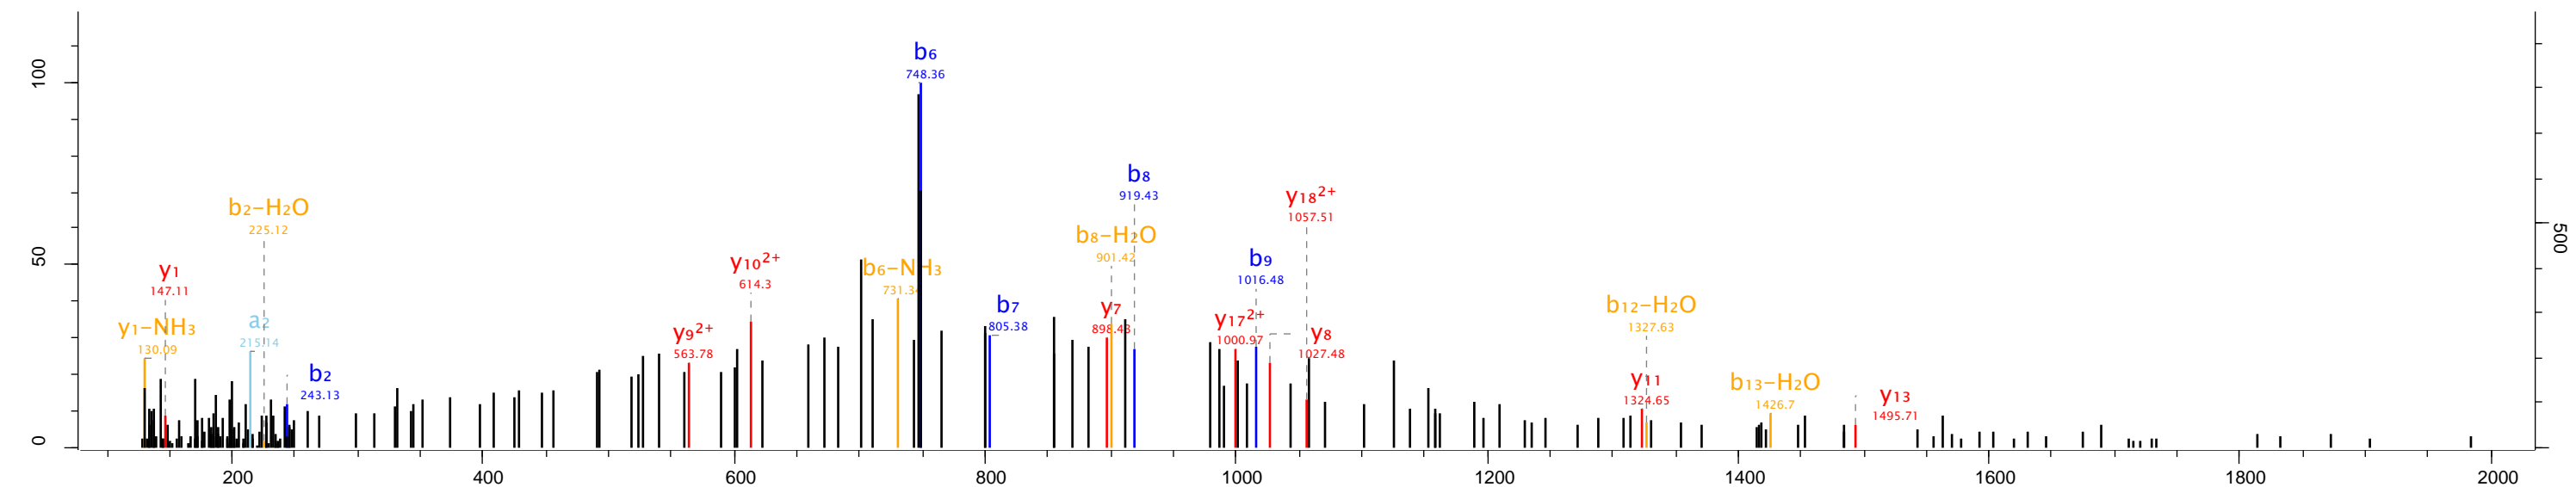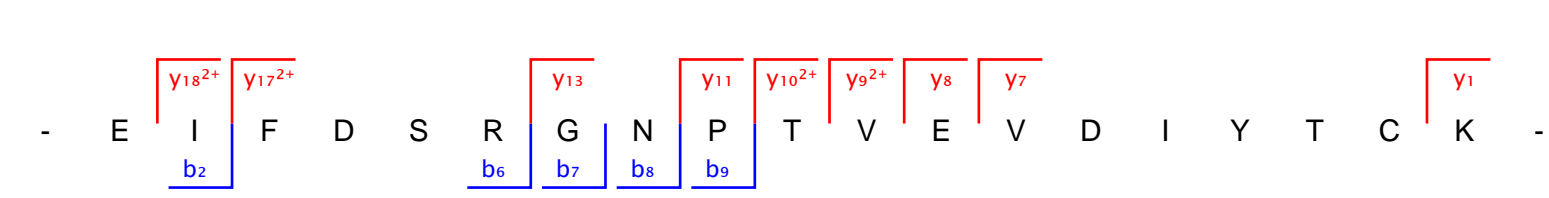

Spectral Annotation for Single-Peptide IDs between Single D11 Cells using Q-OT-LIT

Raw file 2015-01-08\_CL04\_Blastomere-15 Scan 39669 Method ITMS; HCD Score 72.15 m/z 599.77

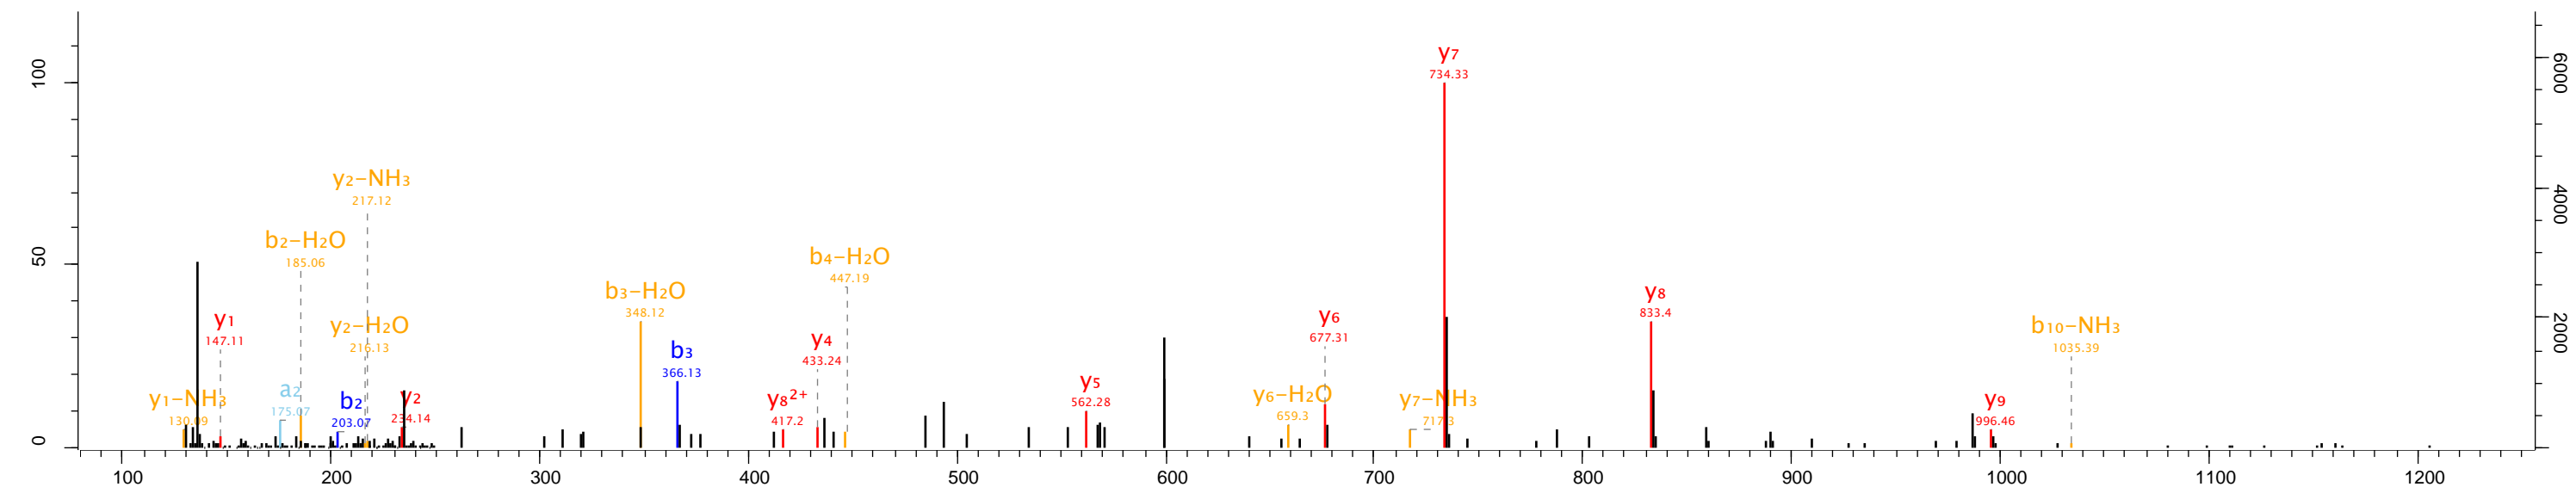

Spectral Annotation for Single-Peptide IDs between Single D11 Cells using Q-OT-LIT



Raw file 2015-01-08\_CL04\_Blastomere-15 Scan 39896 Method ITMS; HCD Score 67.08 m/z 668.36

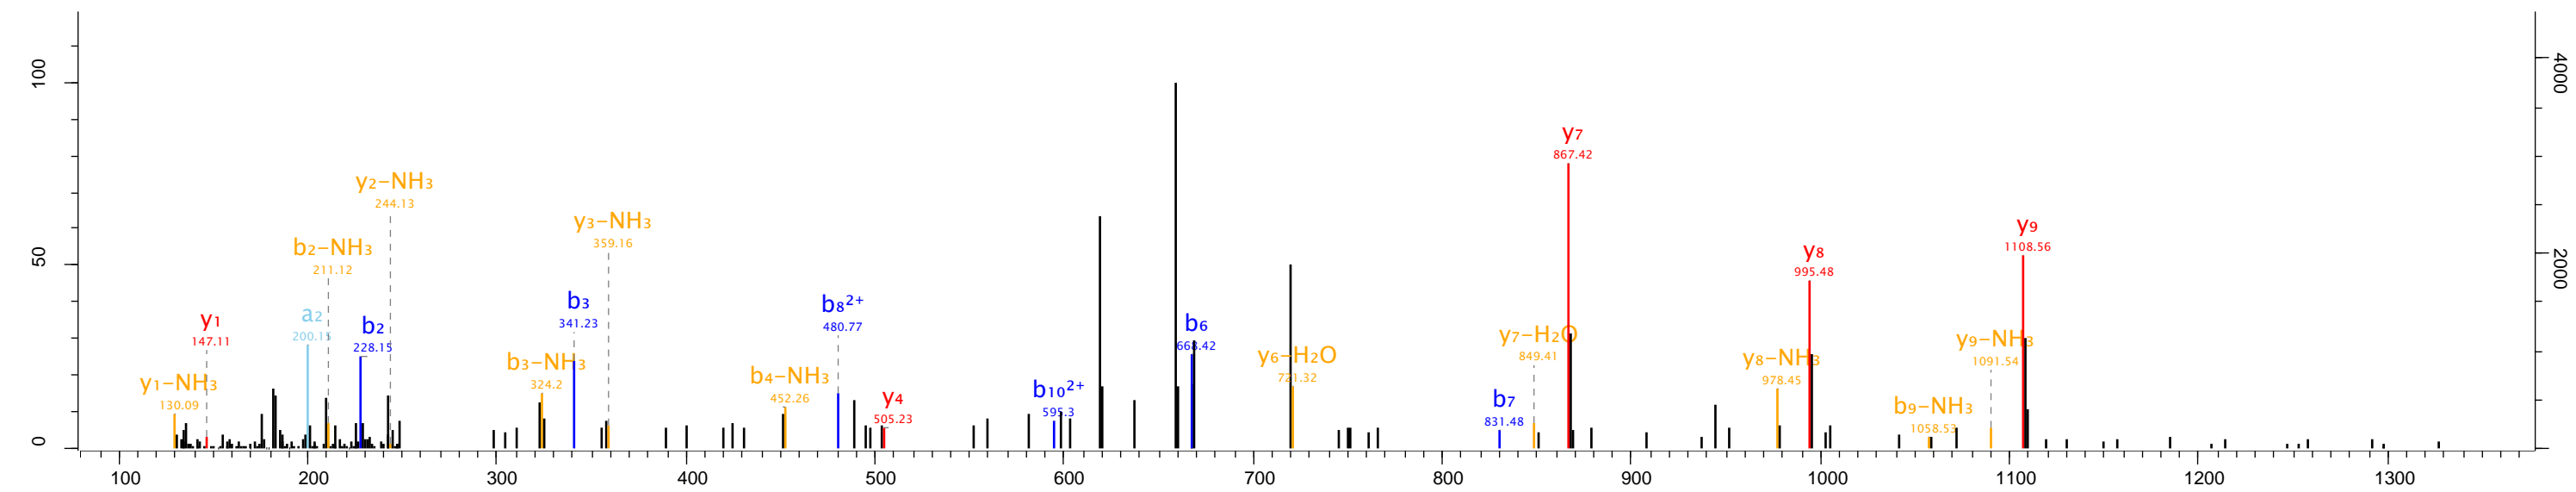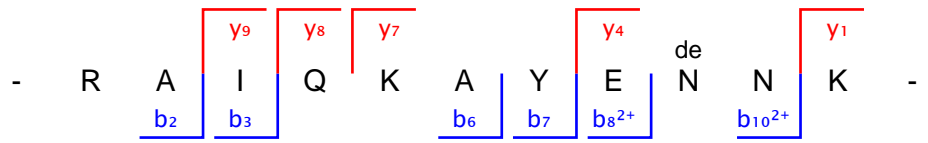

Spectral Annotation for Single-Peptide IDs between Single D11 Cells using Q-OT-LIT

Raw file 2015-01-08\_CL04\_Blastomere-15 Scan 39937 Method ITMS; HCD Score 75.42 m/z 668.35

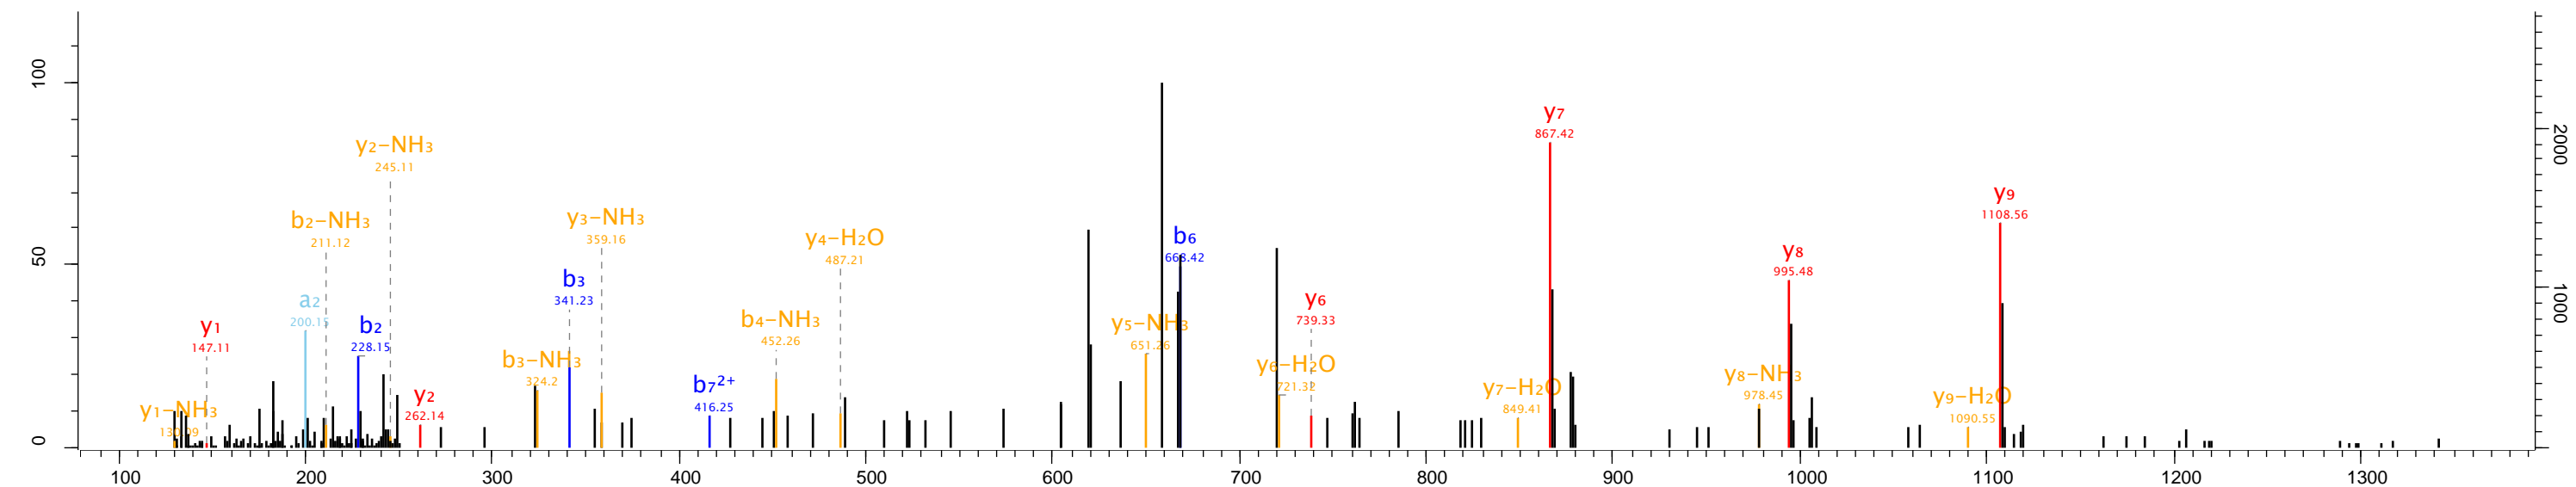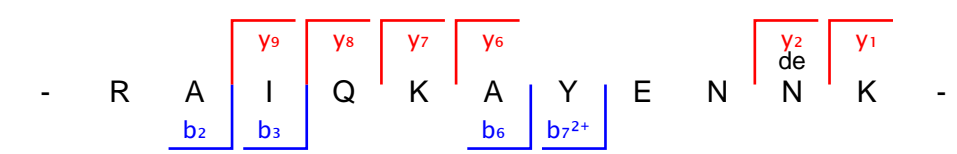

Spectral Annotation for Single-Peptide IDs between Single D11 Cells using Q-OT-LIT

Raw file 2015-01-08\_CL04\_Blastomere-15  
 Scan 40065 Method ITMS; HCD Score 32.31 m/z 859.39

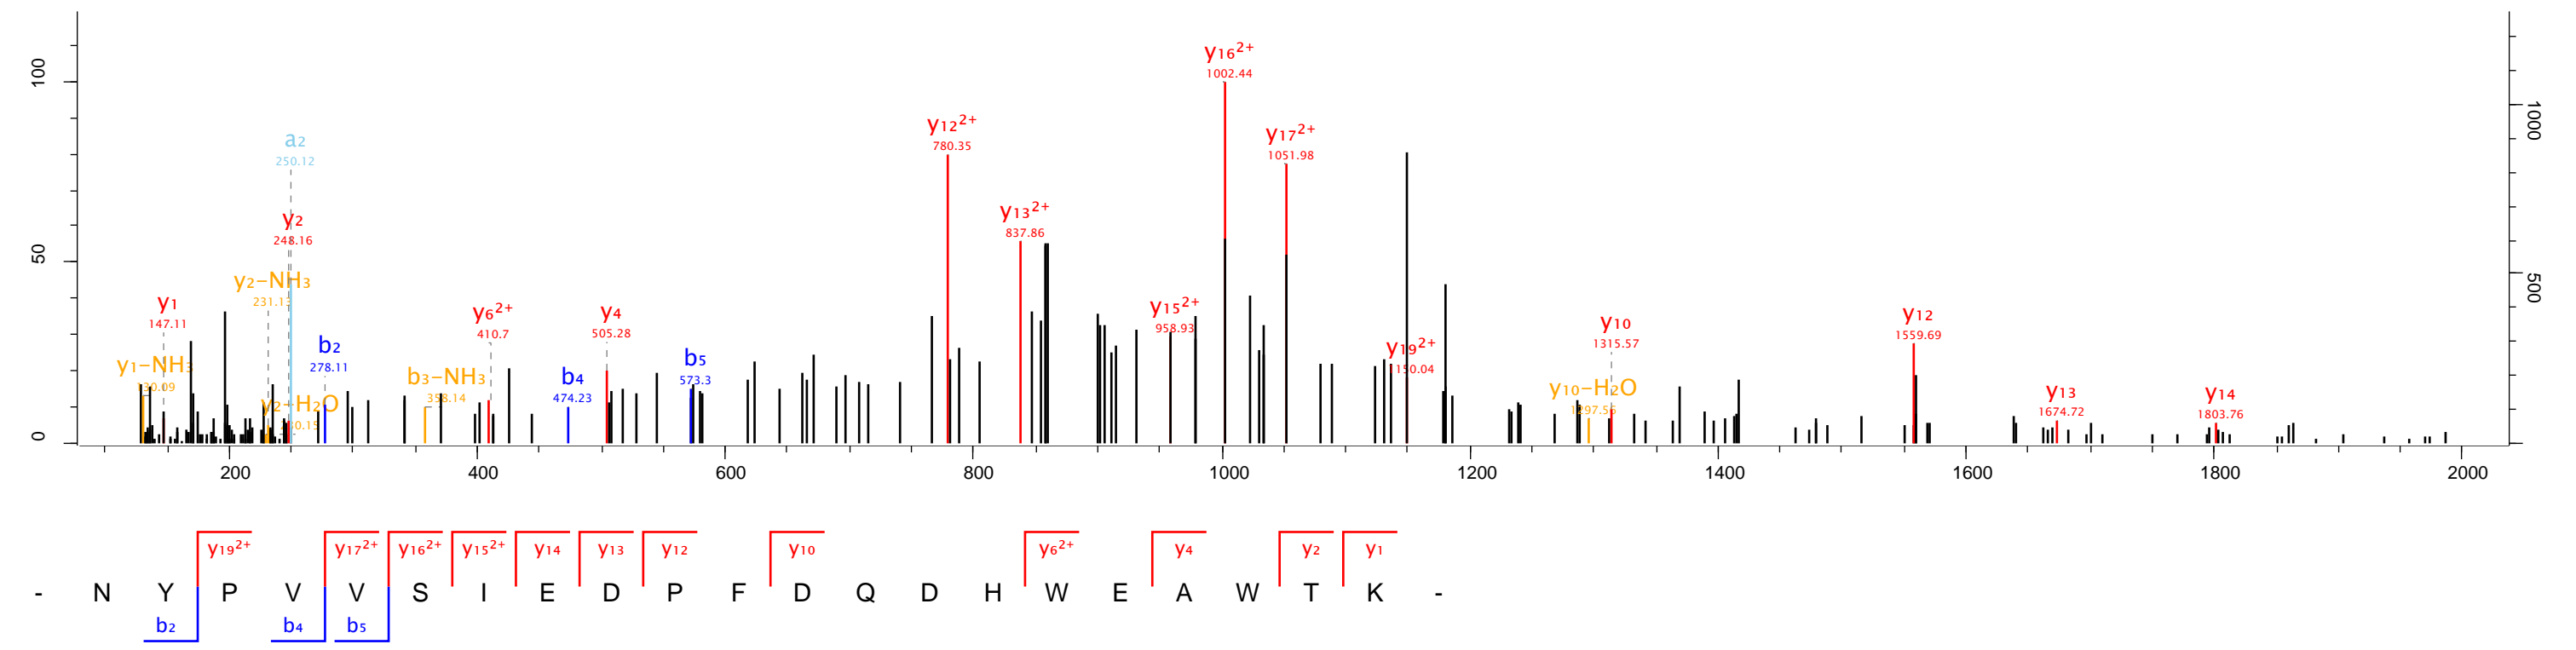

Spectral Annotation for Single-Peptide IDs between Single D11 Cells using Q-OT-LIT

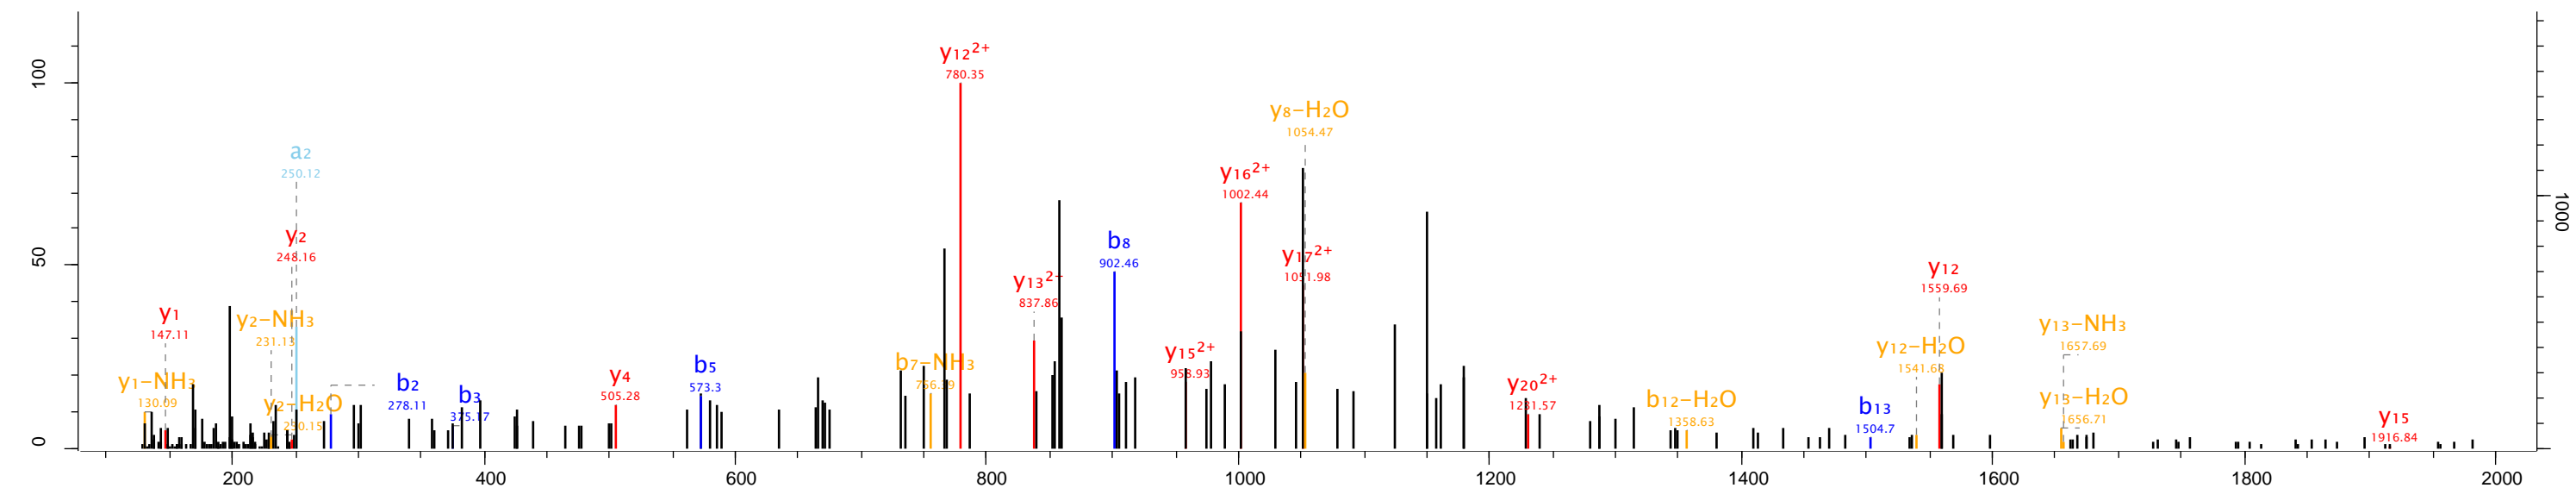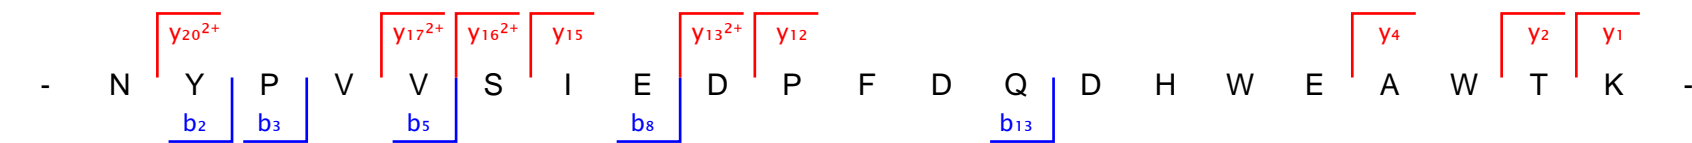

Raw file 2015-01-08\_CL04\_Blastomere-15 Scan 40311 Method ITMS; HCD Score 61.11 m/z 720.35

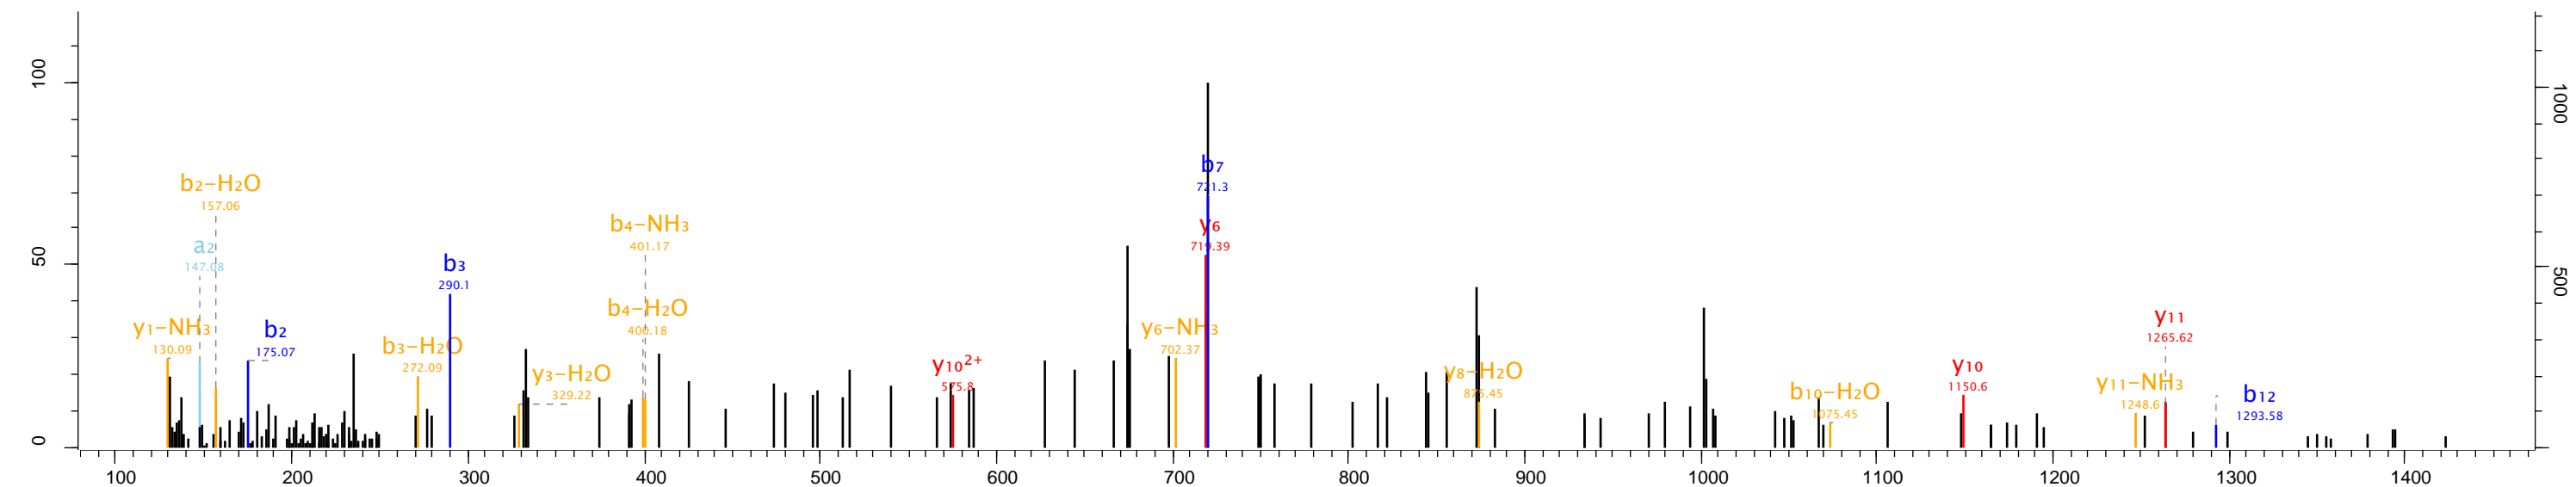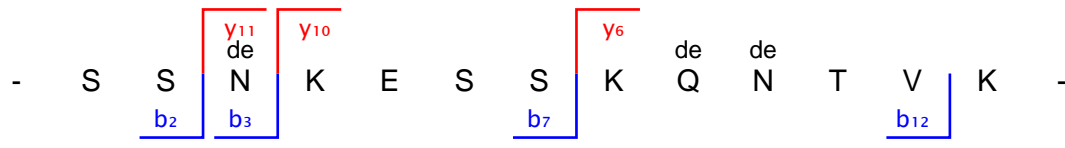

Spectral Annotation for Single-Peptide IDs between Single D11 Cells using Q-OT-LIT

Raw file 2015-01-08\_CL04\_Blastomere-15 Scan 40390 Method ITMS; HCD Score 43.48 m/z 859.73

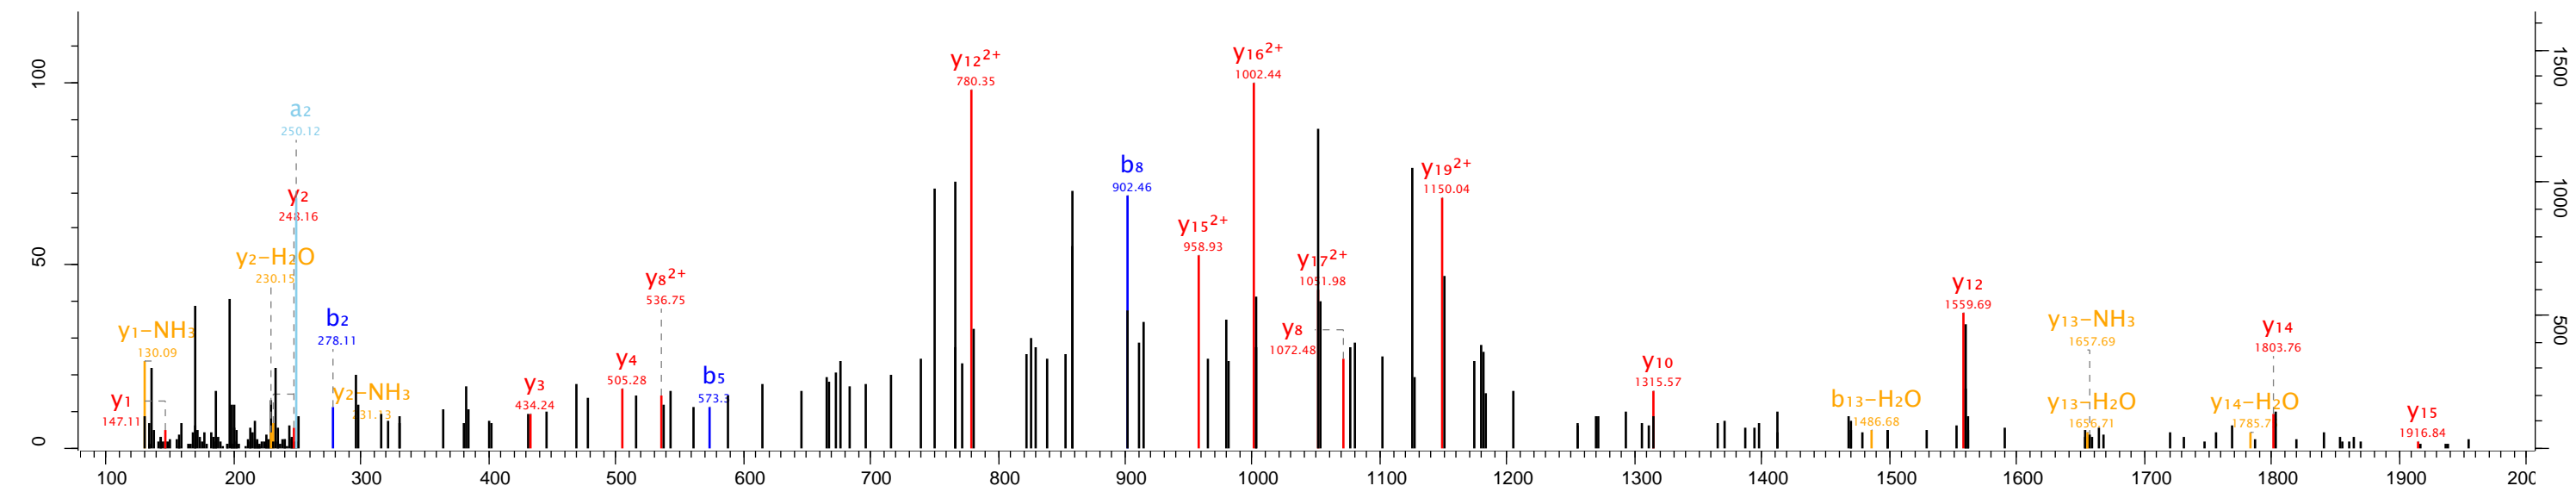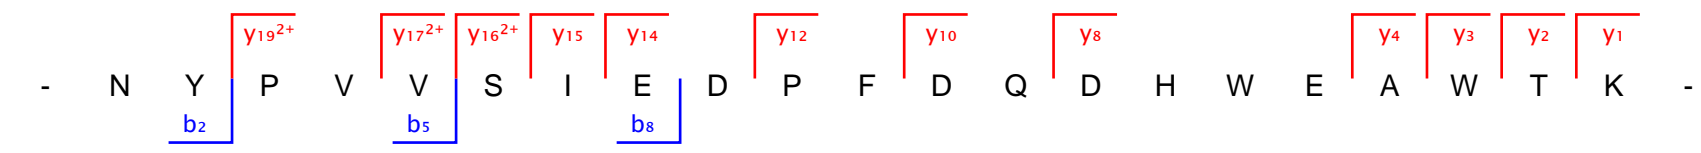

Spectral Annotation for Single-Peptide IDs between Single D11 Cells using Q-OT-LIT

Raw file 2015-01-08\_CL04\_Blastomere-15 Scan 40474 Method ITMS; HCD Score 54.34 m/z 645.32

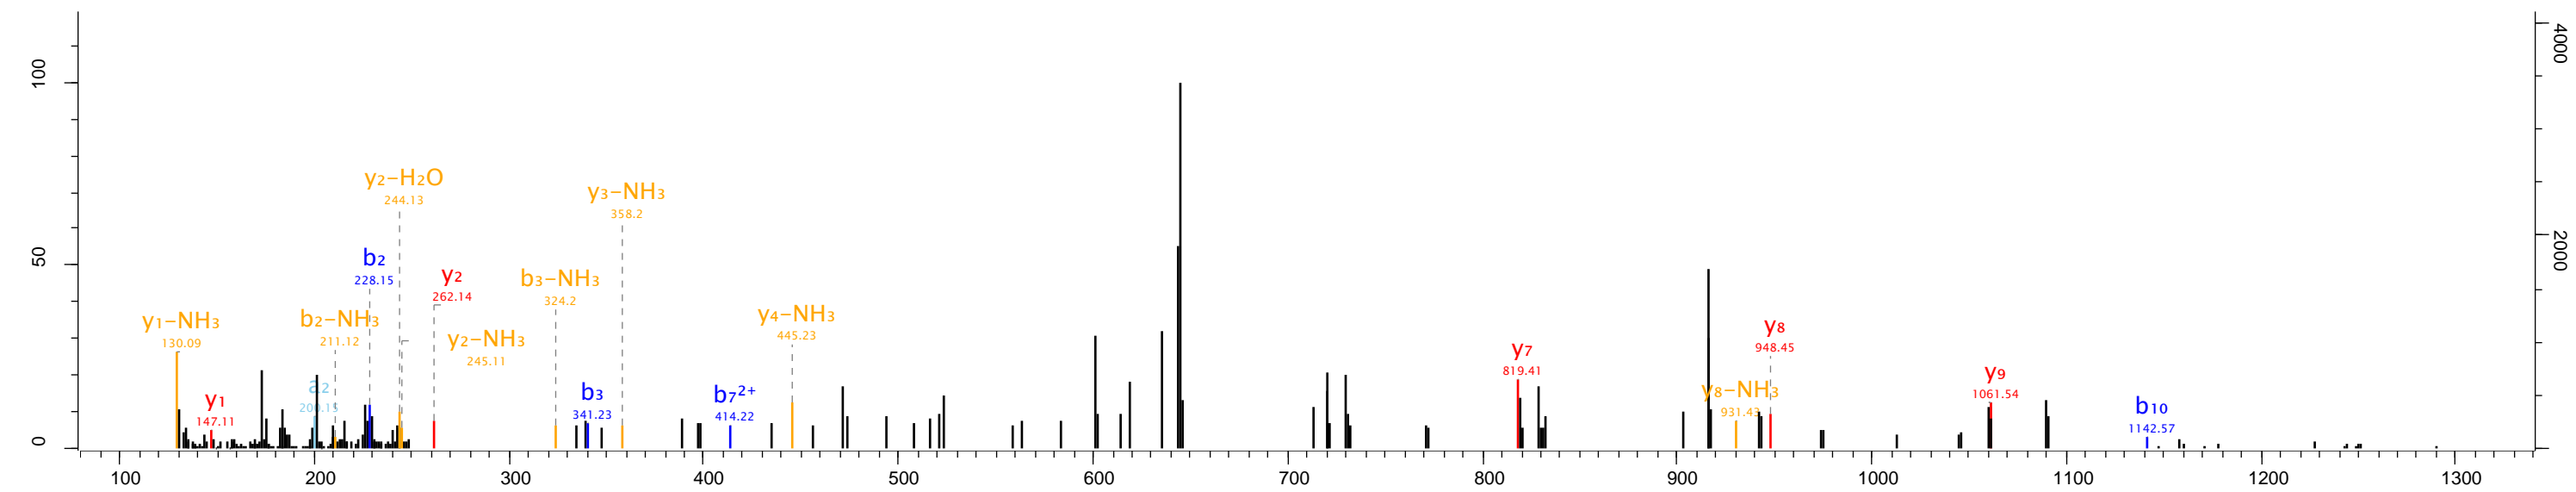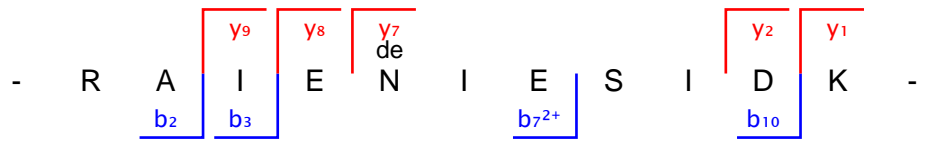

Spectral Annotation for Single-Peptide IDs between Single D11 Cells using Q-OT-LIT

Raw file 2015-01-08\_CL04\_Blastomere-15 Scan 40532 Method ITMS; HCD Score 41.24 m/z 851.42

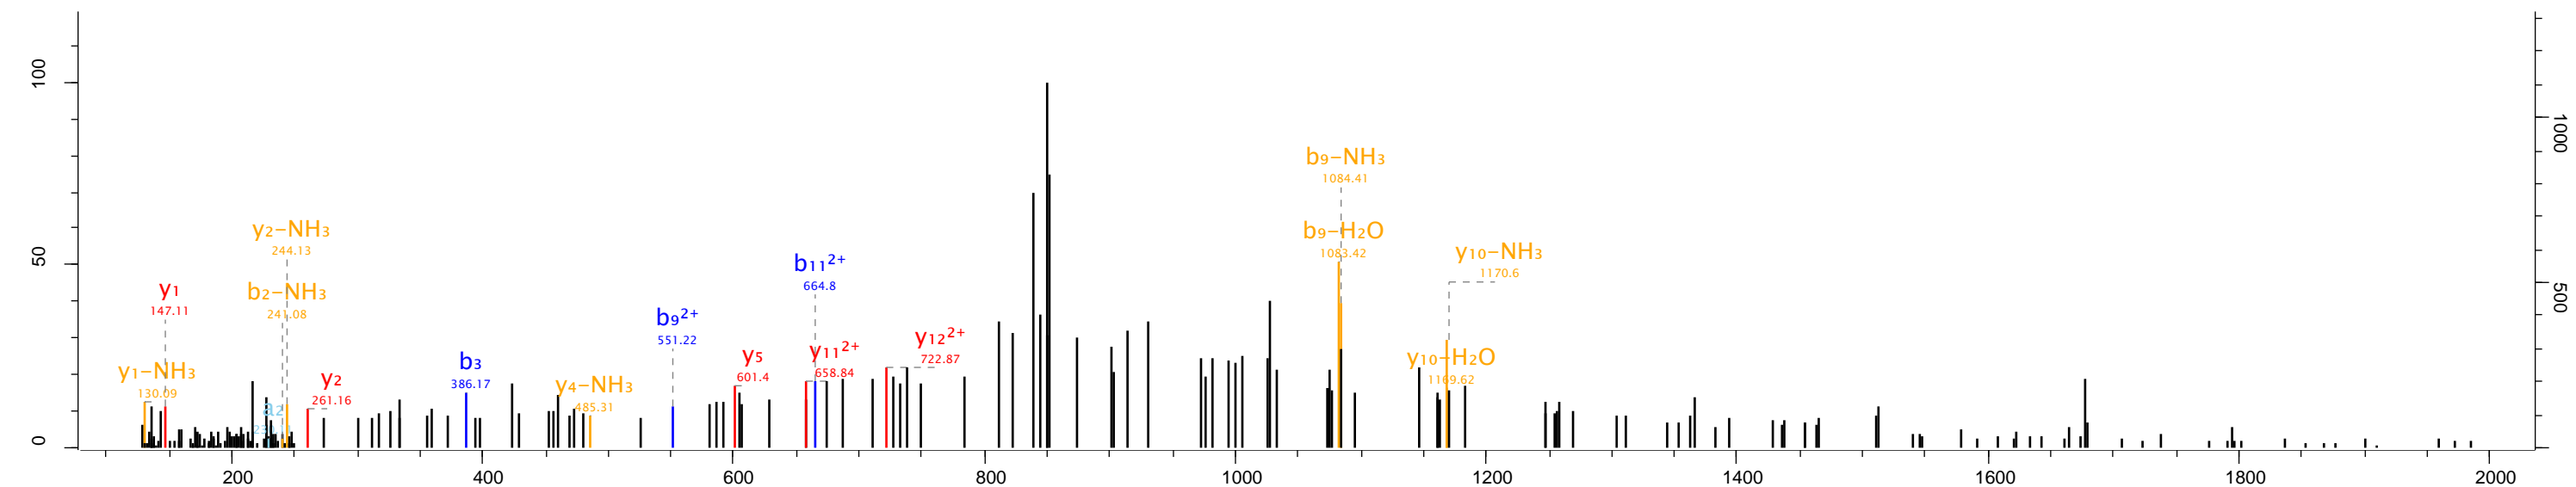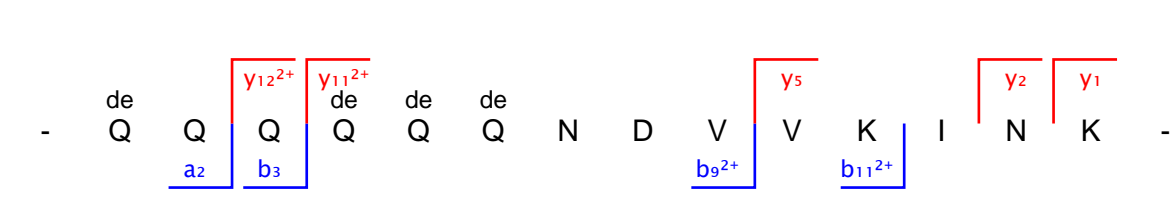

Spectral Annotation for Single-Peptide IDs between Single D11 Cells using Q-OT-LIT



Raw file 2015-01-08\_CL04\_Blastomere-15 Scan 40572 Method ITMS; HCD Score 97.82 m/z 840.13

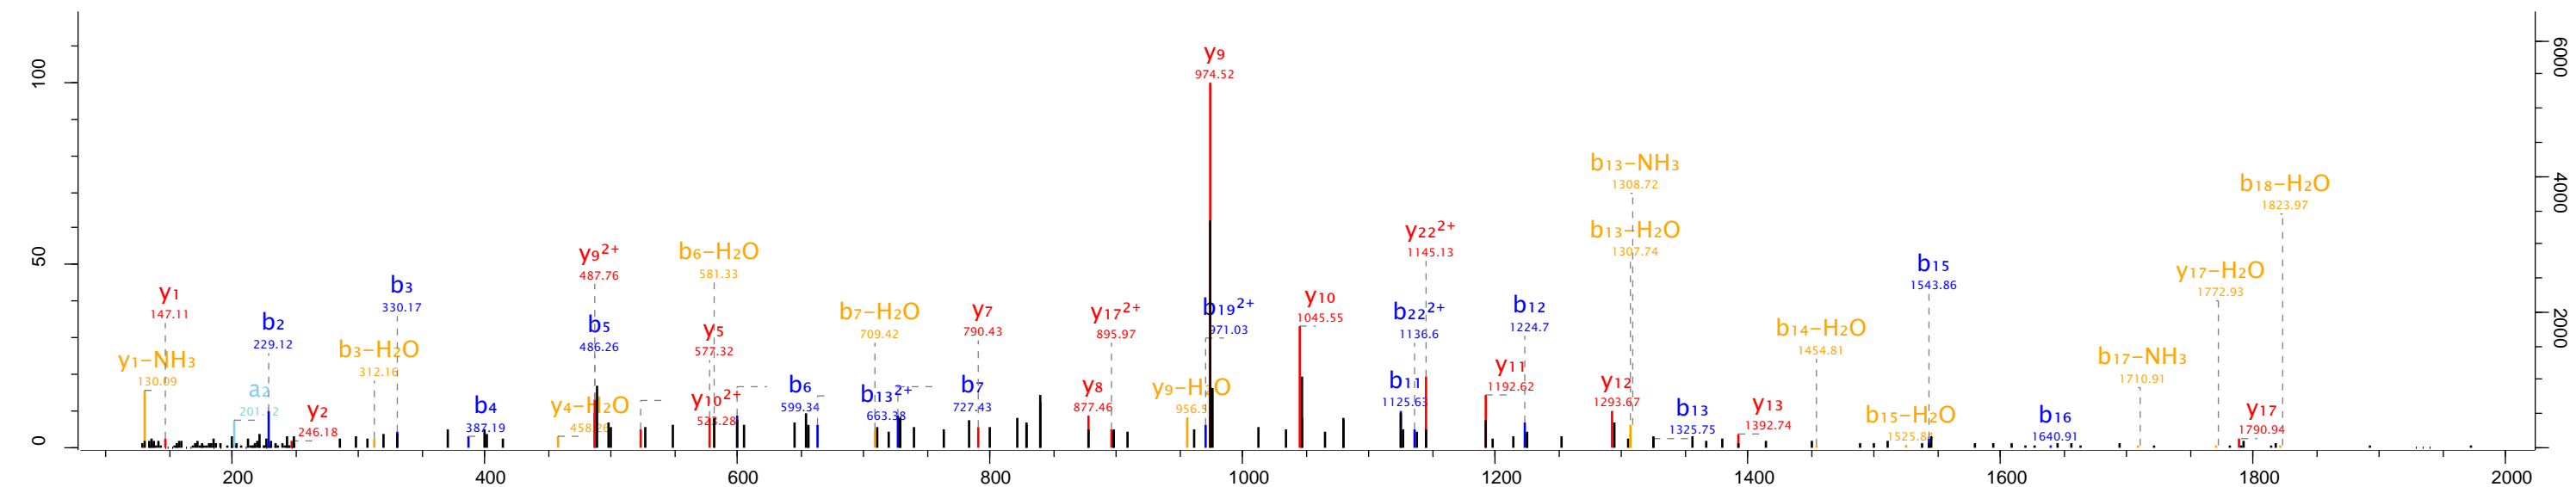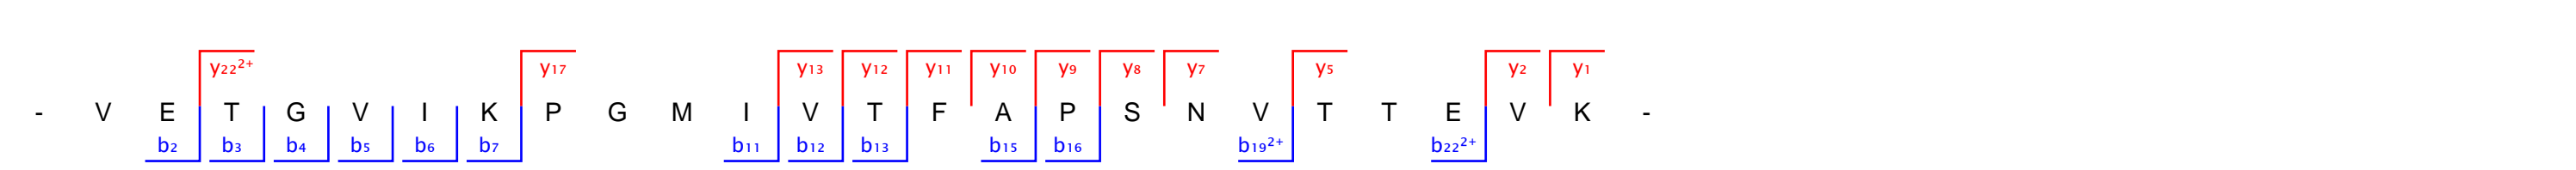

Spectral Annotation for Single-Peptide IDs between Single D11 Cells using Q-OT-LIT

Raw file 2015-01-08\_CL04\_Blastomere-15 Scan 40597 Method ITMS; HCD Score 125.35 m/z 840.12

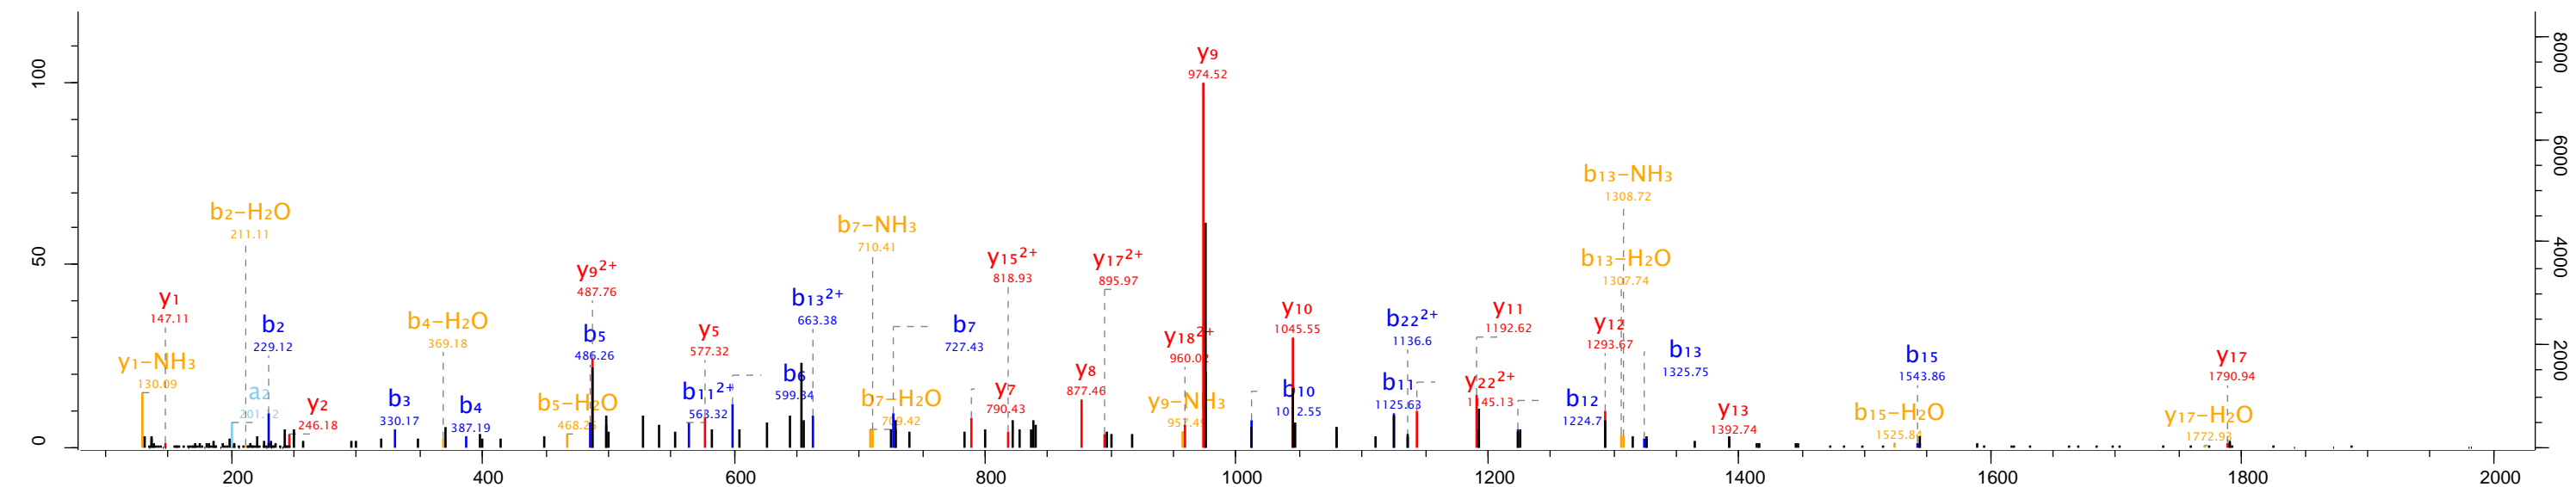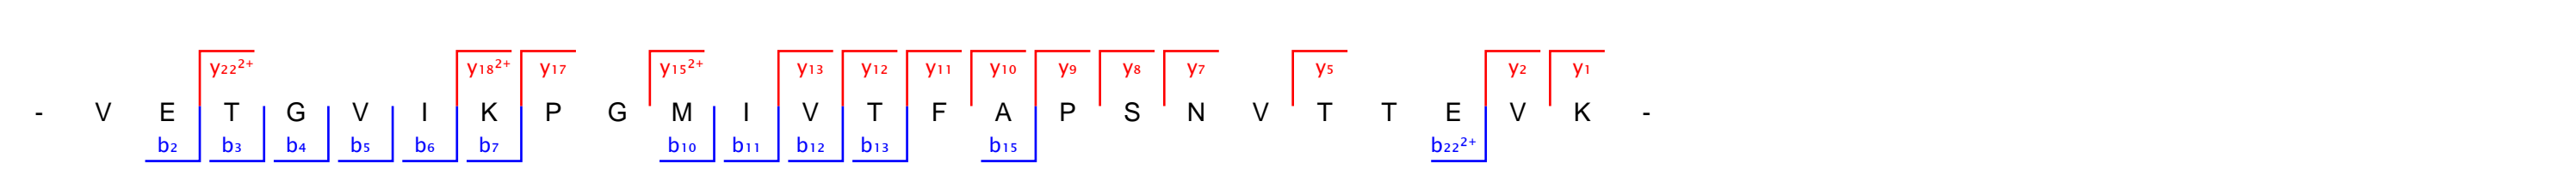

Spectral Annotation for Single-Peptide IDs between Single D11 Cells using Q-OT-LIT

Raw file 2015-01-08\_CL04\_Blastomere-15 Scan 40925 Method ITMS; HCD Score 106.26 m/z 718.33

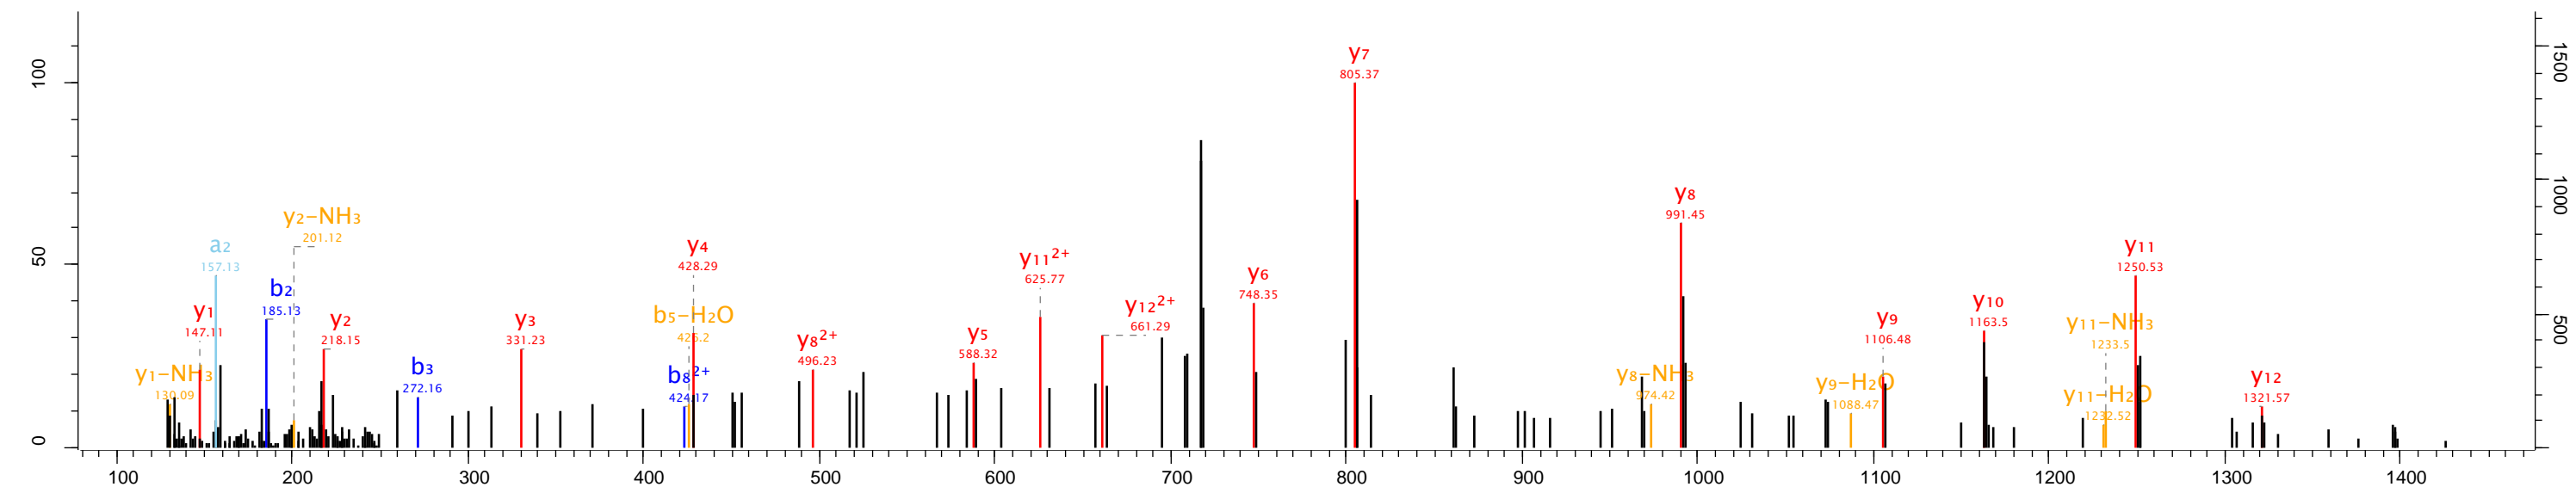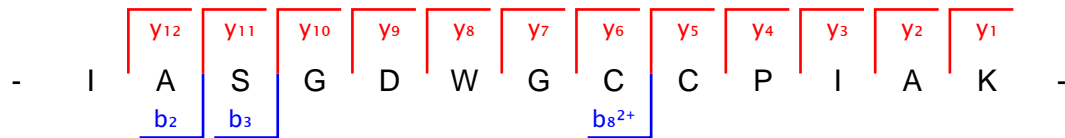

Spectral Annotation for Single-Peptide IDs between Single D11 Cells using Q-OT-LIT

Raw file 2015-01-08\_CL04\_Blastomere-15 Scan 40951 Method ITMS; HCD Score 104.94 m/z 718.33

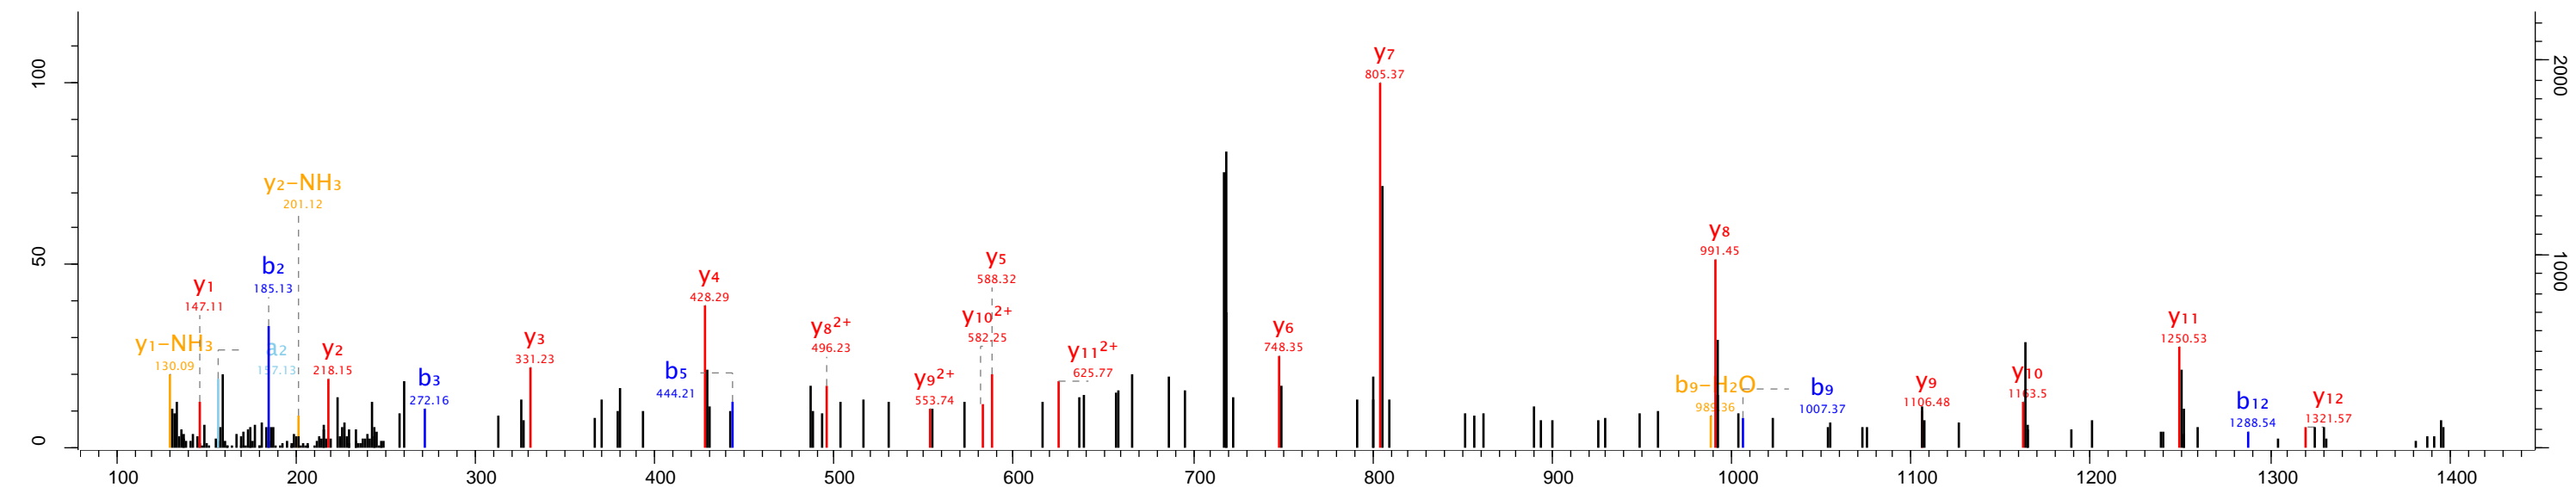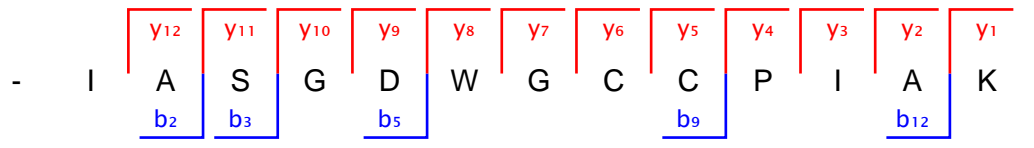

Spectral Annotation for Single-Peptide IDs between Single D11 Cells using Q-OT-LIT

Raw file 2015-01-08\_CL04\_Blastomere-15 Scan 40979 Method ITMS; HCD Score 60.55 m/z 666.85

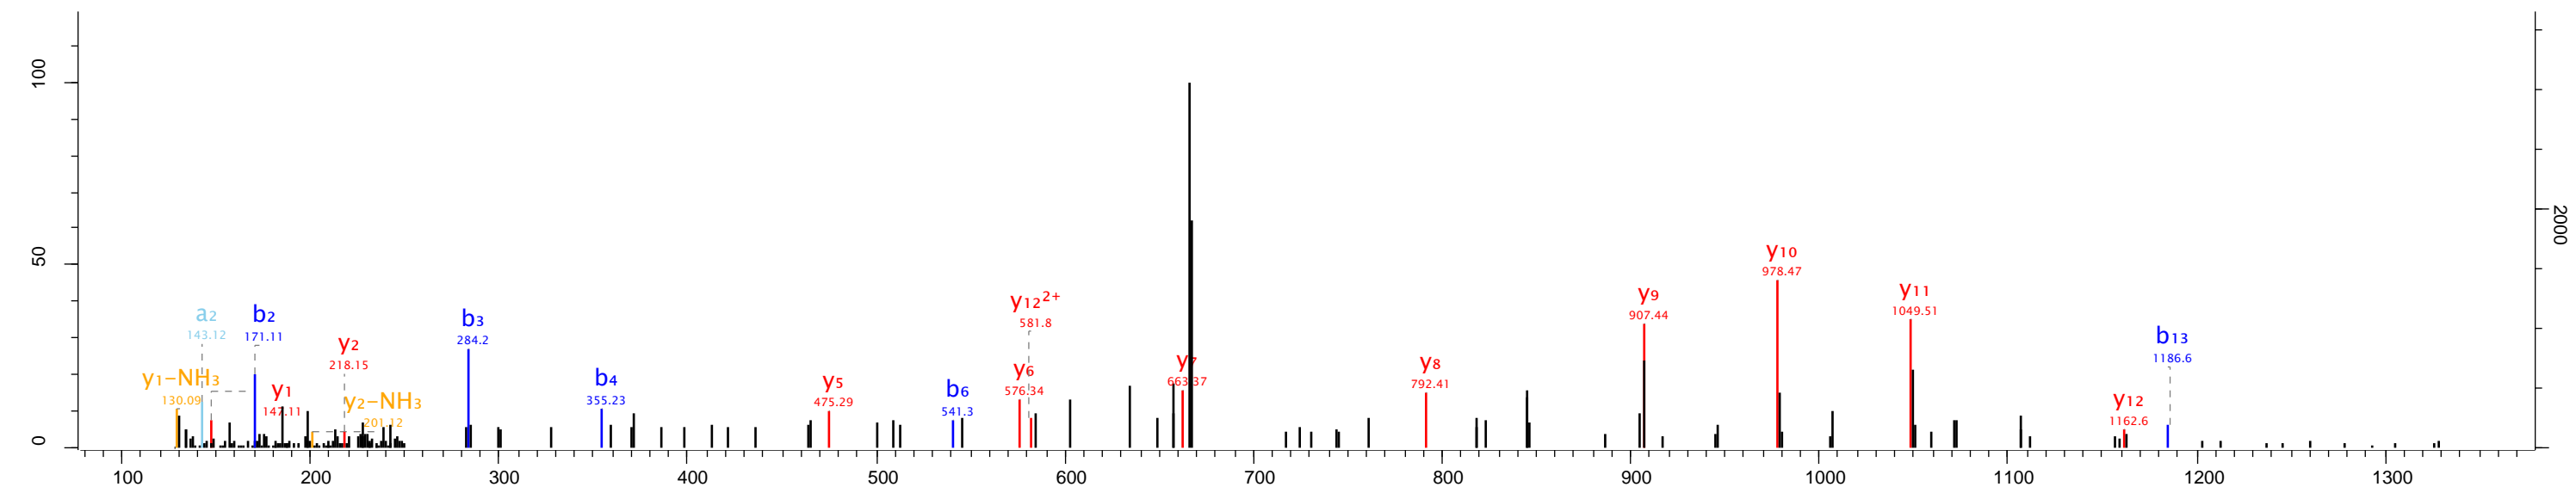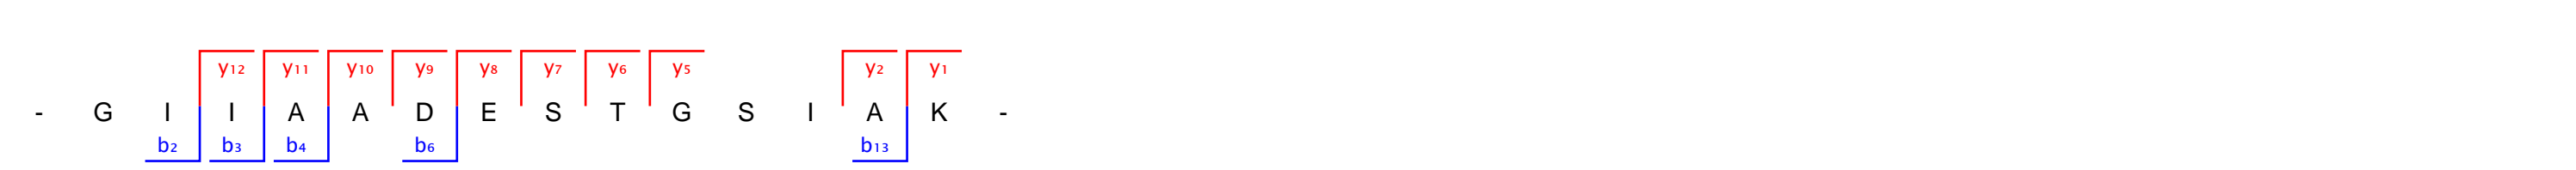

Spectral Annotation for Single-Peptide IDs between Single D11 Cells using Q-OT-LIT

Raw file 2015-01-08\_CL04\_Blastomere-15 Scan 41029 Method ITMS; HCD Score 59.75 m/z 666.85

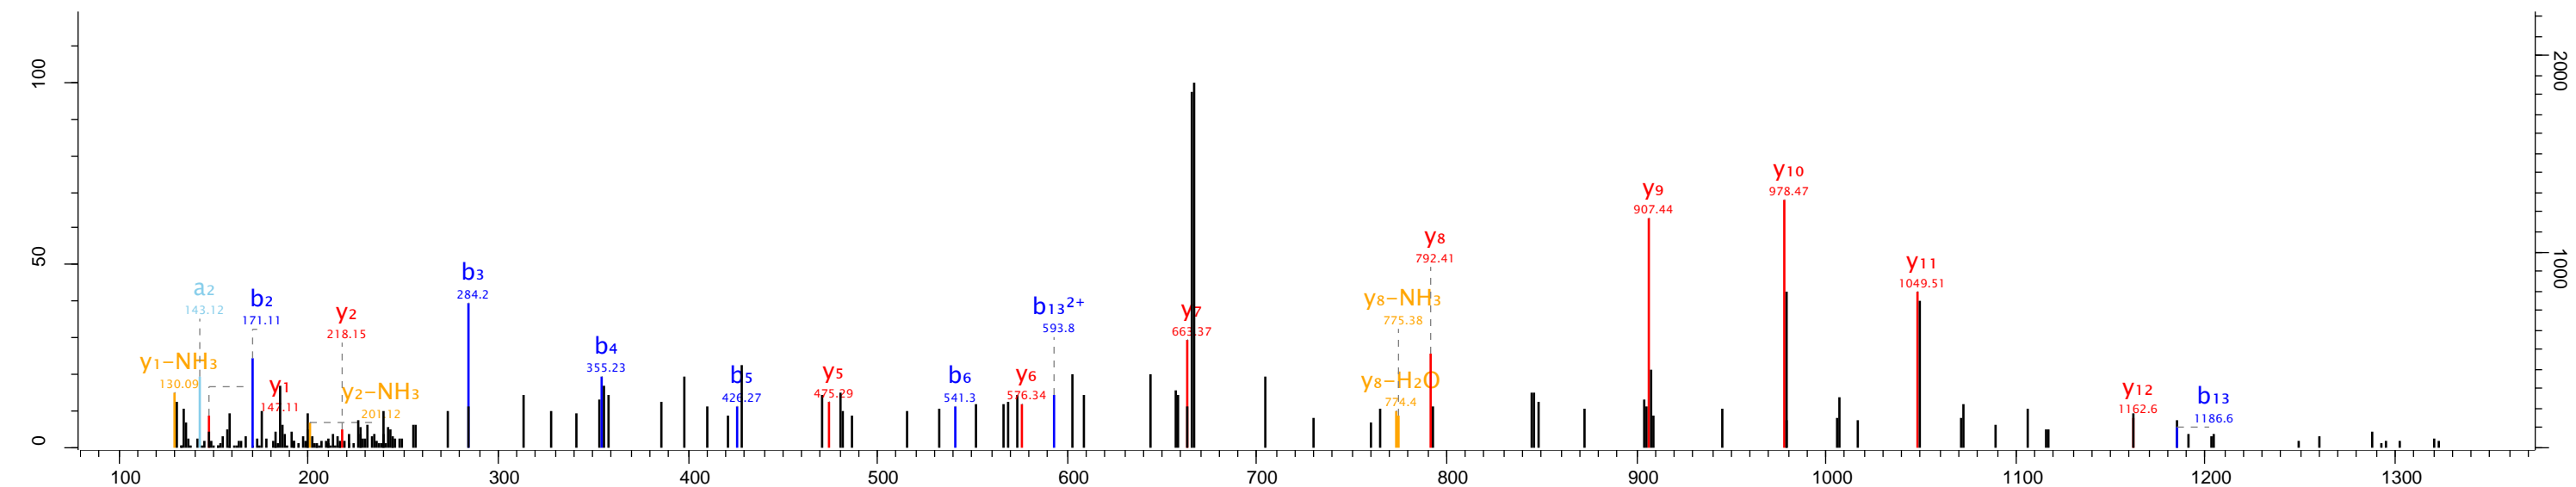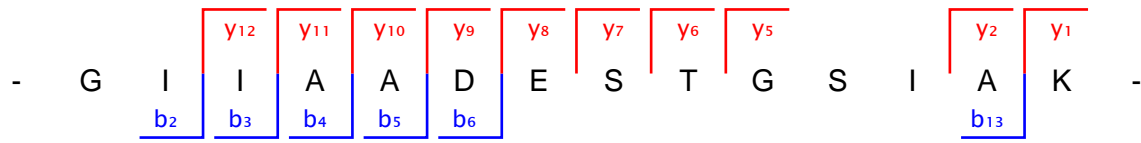

Spectral Annotation for Single-Peptide IDs between Single D11 Cells using Q-OT-LIT

Raw file 2015-01-08\_CL04\_Blastomere-15 Scan 41056 Method ITMS; HCD Score 61.41 m/z 666.85

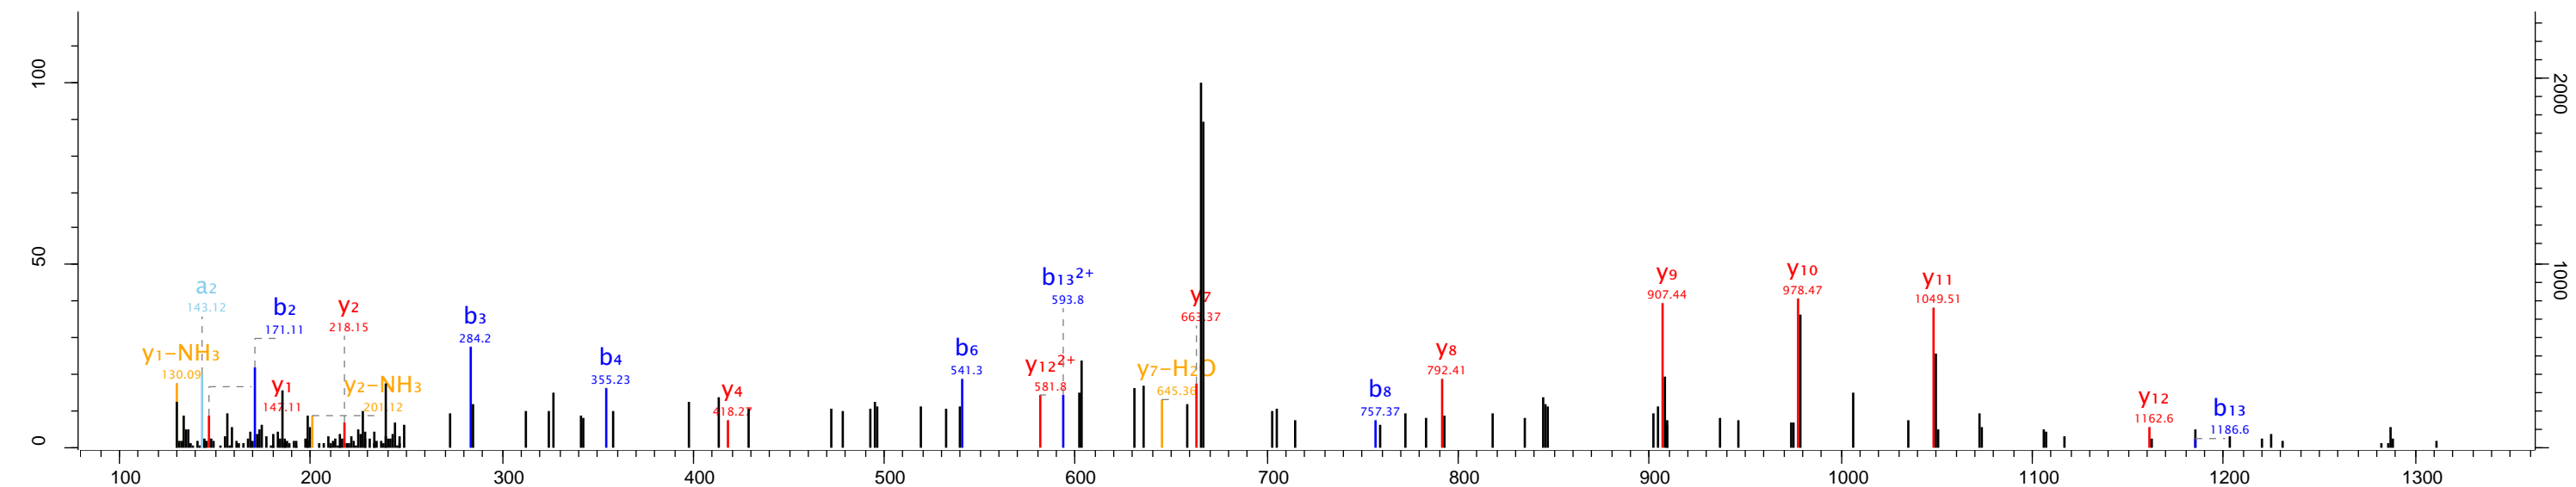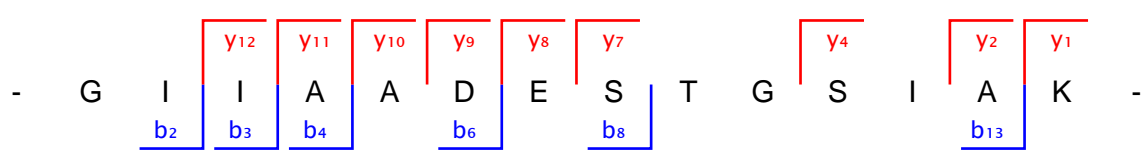

Spectral Annotation for Single-Peptide IDs between Single D11 Cells using Q-OT-LIT

Raw file 2015-01-08\_CL04\_Blastomere-15 Scan 41084 Method ITMS; HCD Score 77.18 m/z 696.81

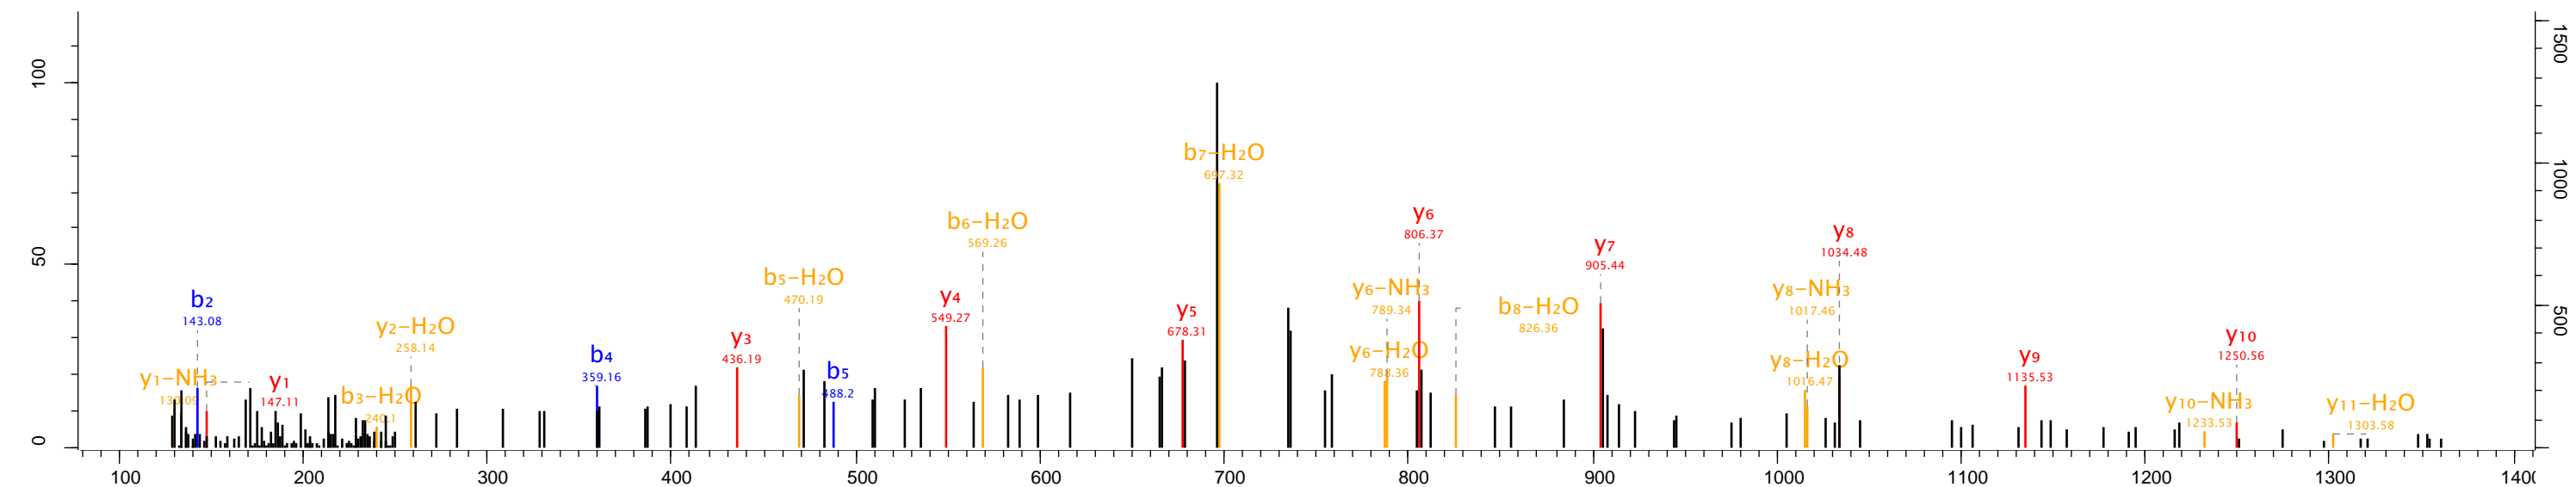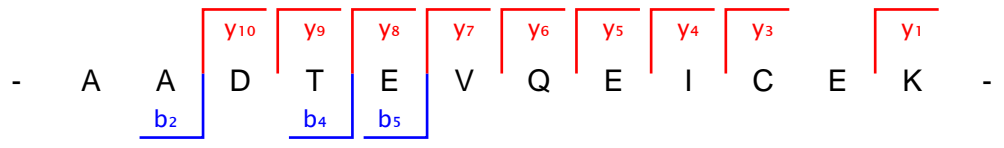

Spectral Annotation for Single-Peptide IDs between Single D11 Cells using Q-OT-LIT



Raw file 2015-01-08\_CL04\_Blastomere-15 Scan 41103 Method ITMS; HCD Score 49.3 m/z 610.33

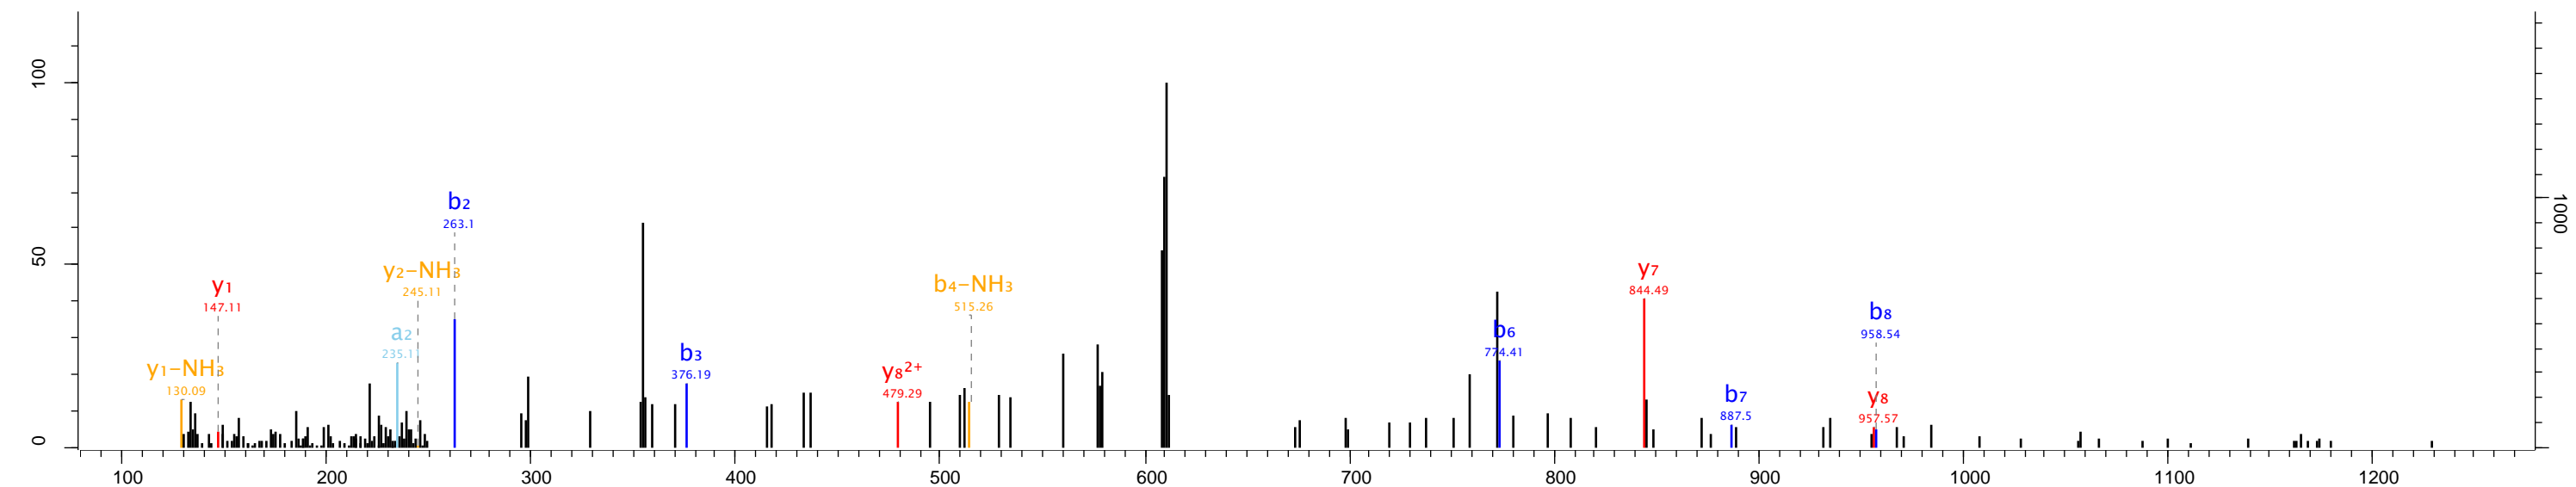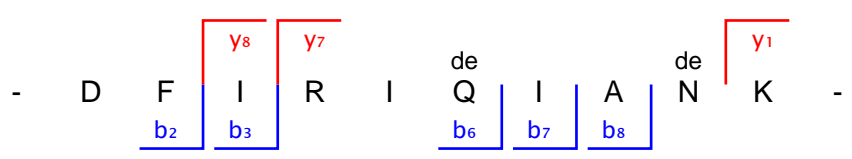

Spectral Annotation for Single-Peptide IDs between Single D11 Cells using Q-OT-LIT

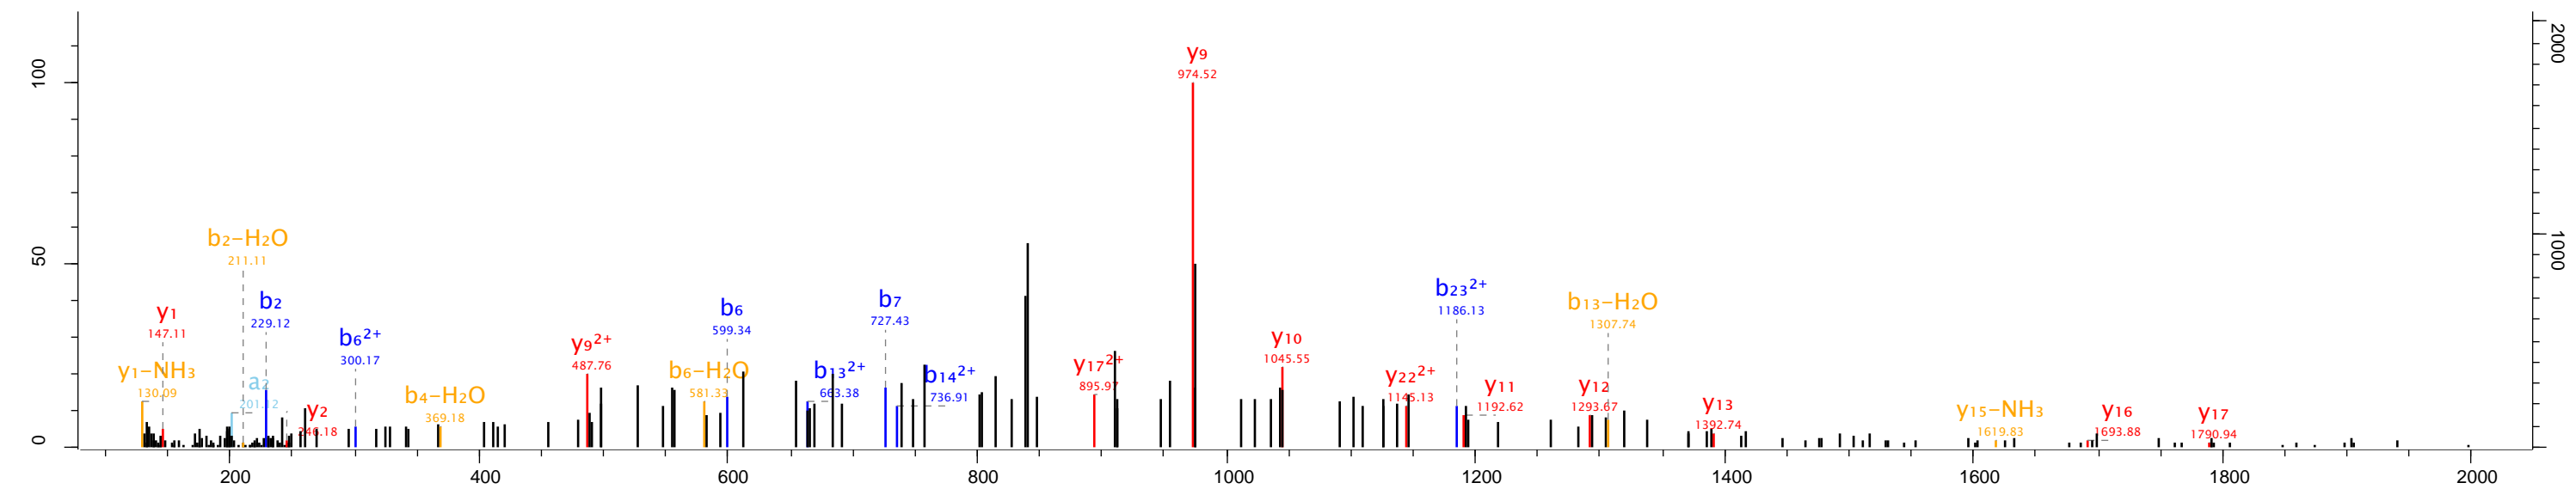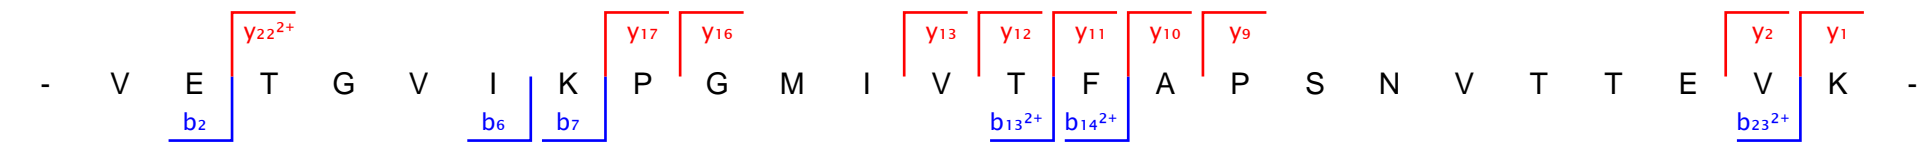

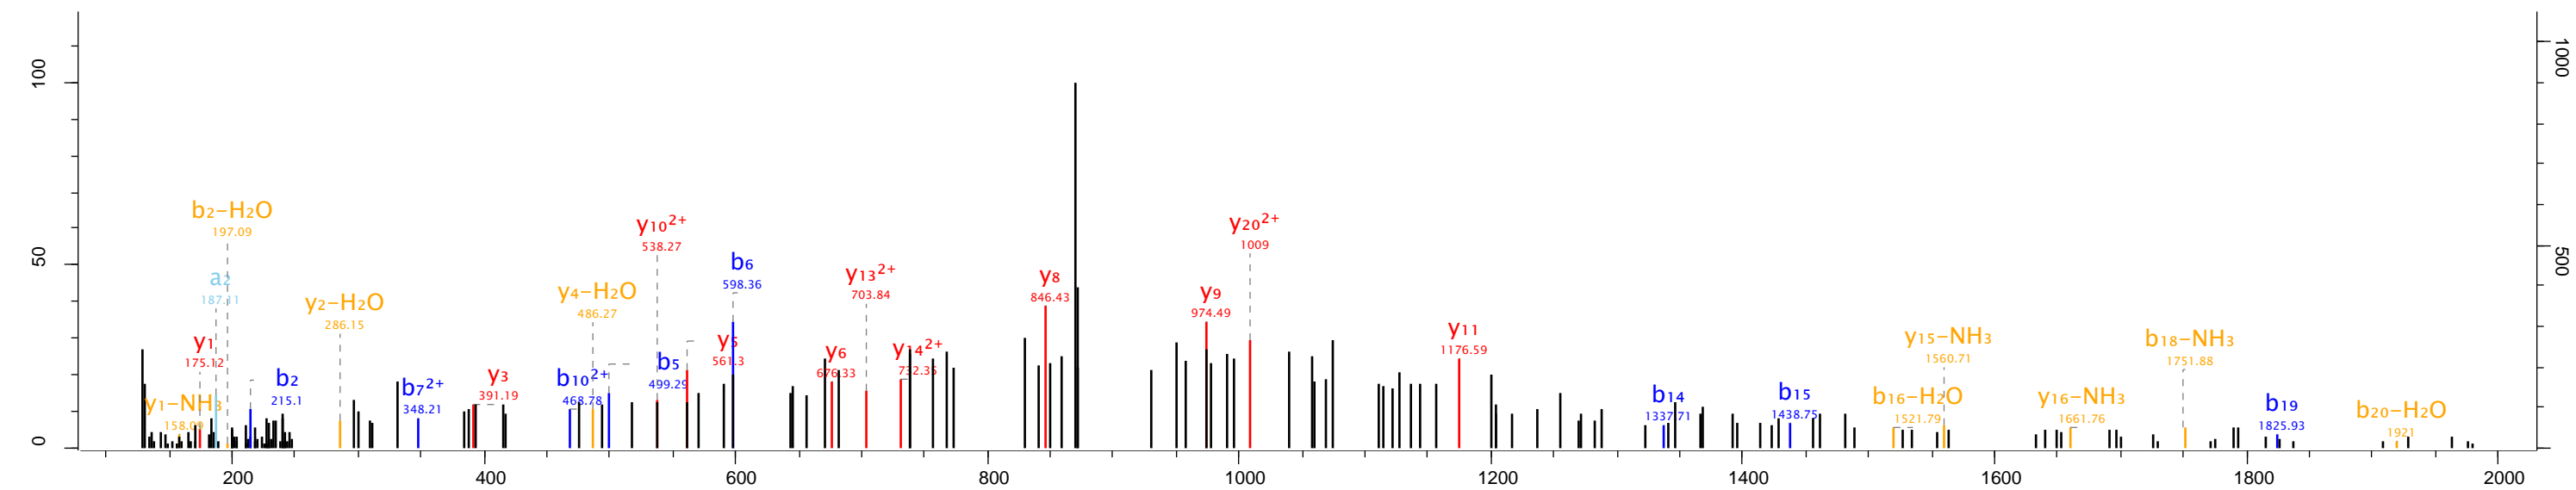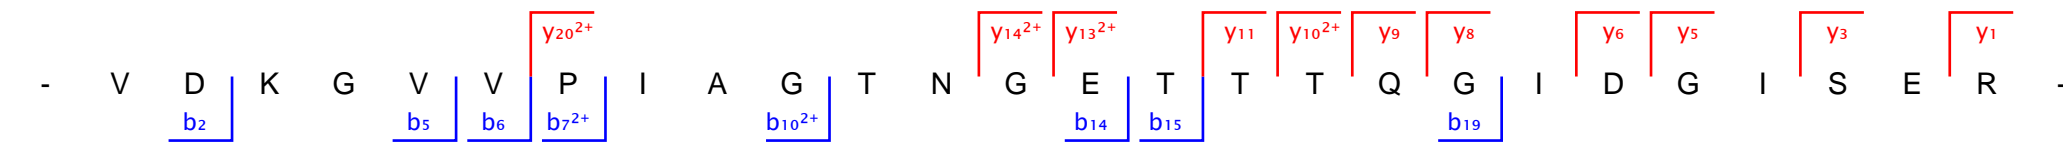

Raw file 2015-01-08\_CL04\_Blastomere-15 Scan 41162 Method ITMS; HCD Score 31.57 m/z 872.44

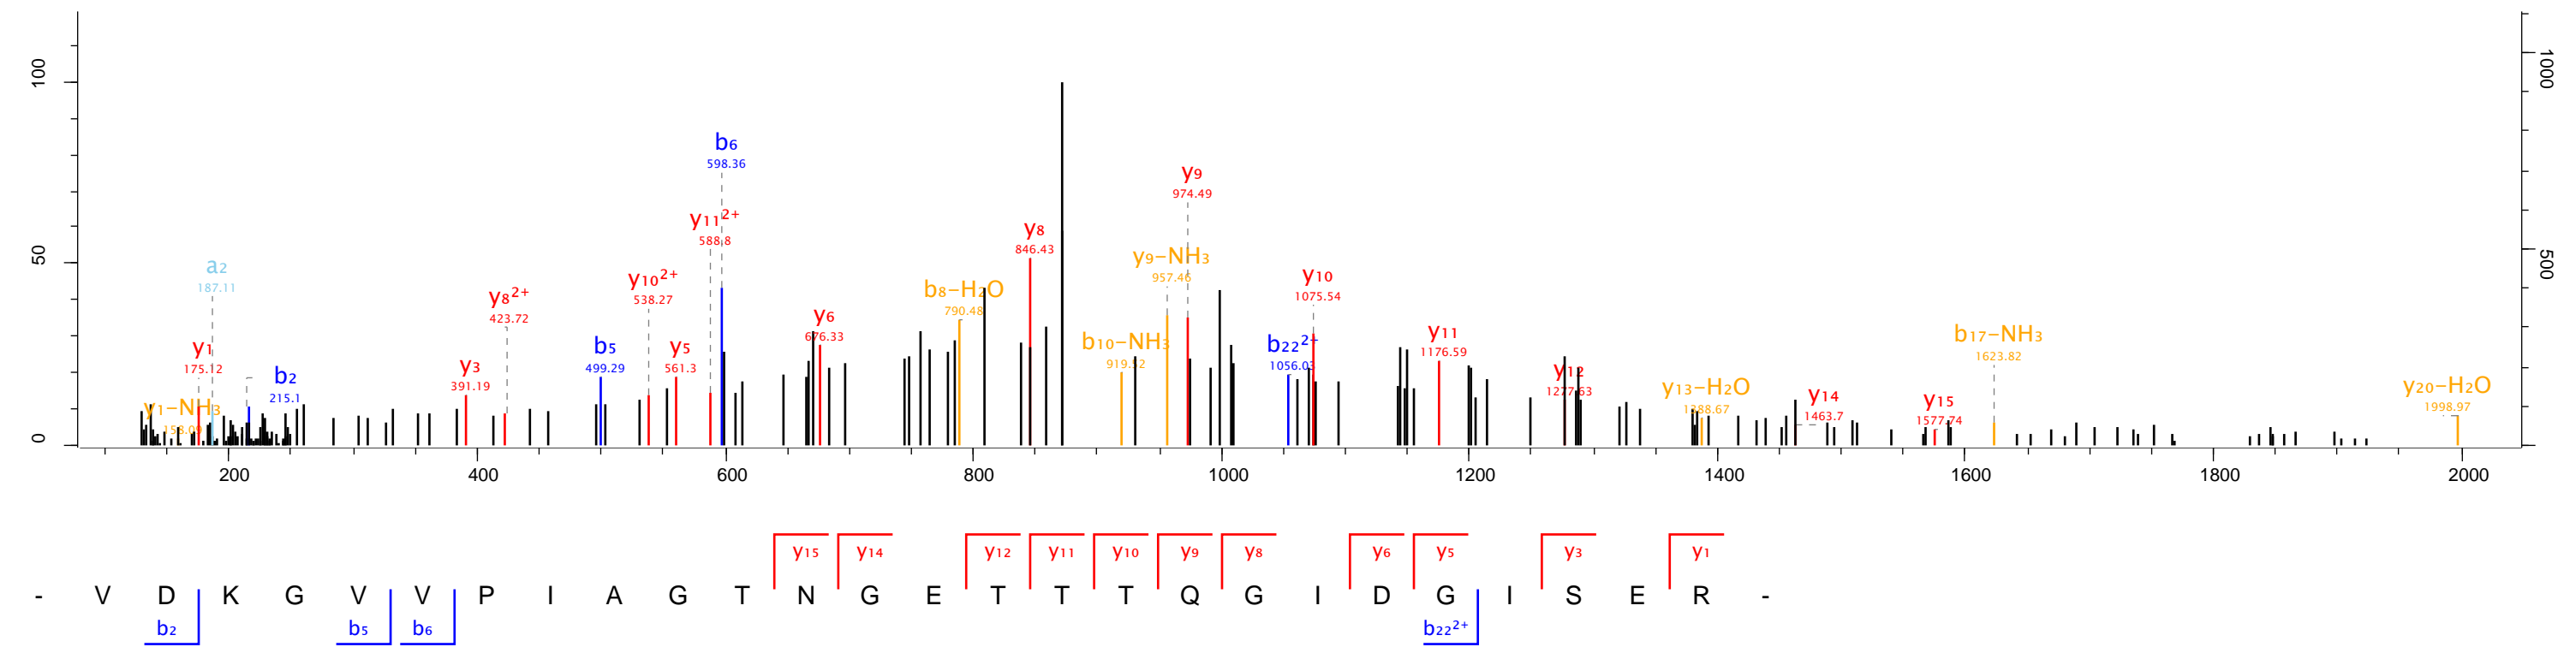

Spectral Annotation for Single-Peptide IDs between Single D11 Cells using Q-OT-LIT

Raw file 2015-01-08\_CL04\_Blastomere-15 Scan 41275 Method ITMS; HCD Score 134.62 m/z 840.12

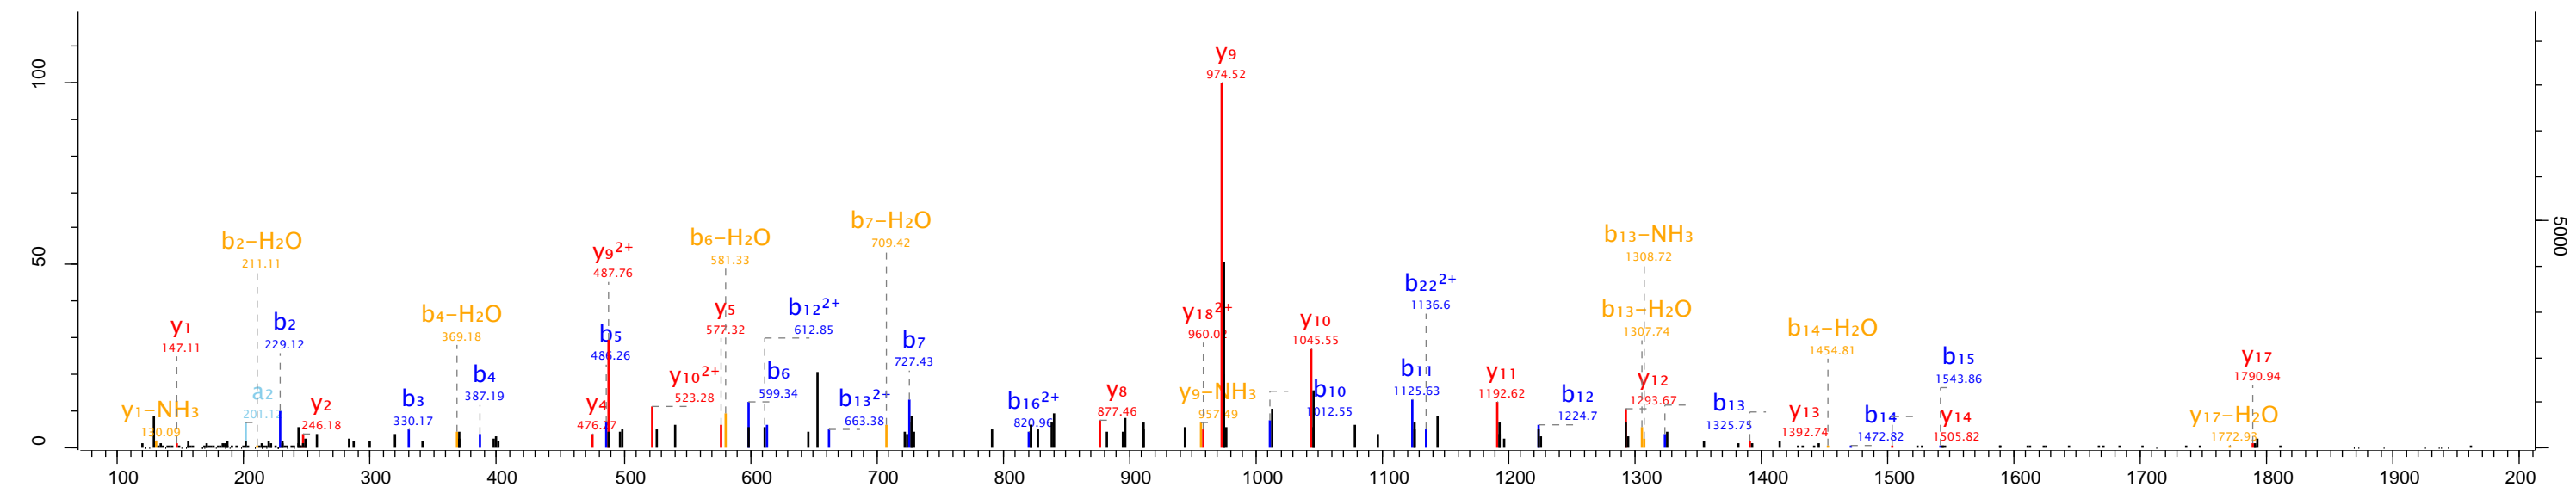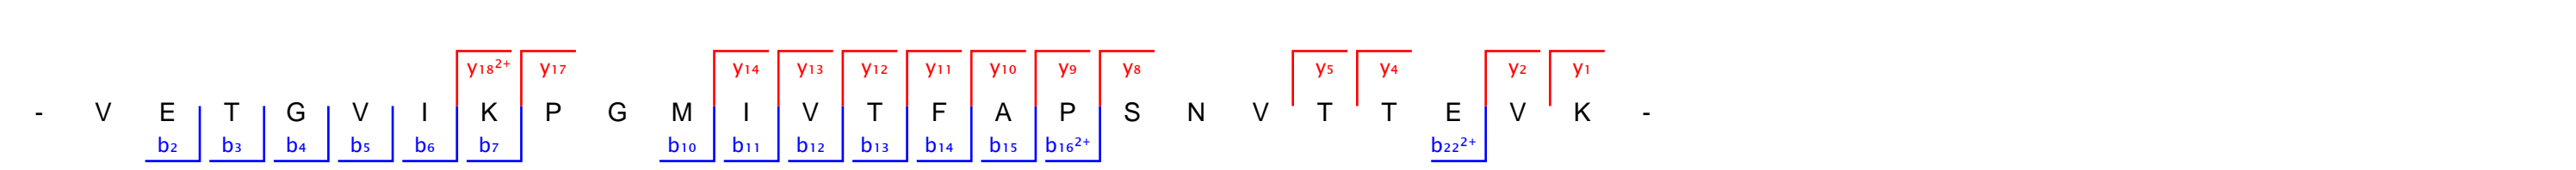

Spectral Annotation for Single-Peptide IDs between Single D11 Cells using Q-OT-LIT

Raw file 2015-01-08\_CL04\_Blastomere-15 Scan 41389 Method ITMS; HCD Score 29.28 m/z 920.47

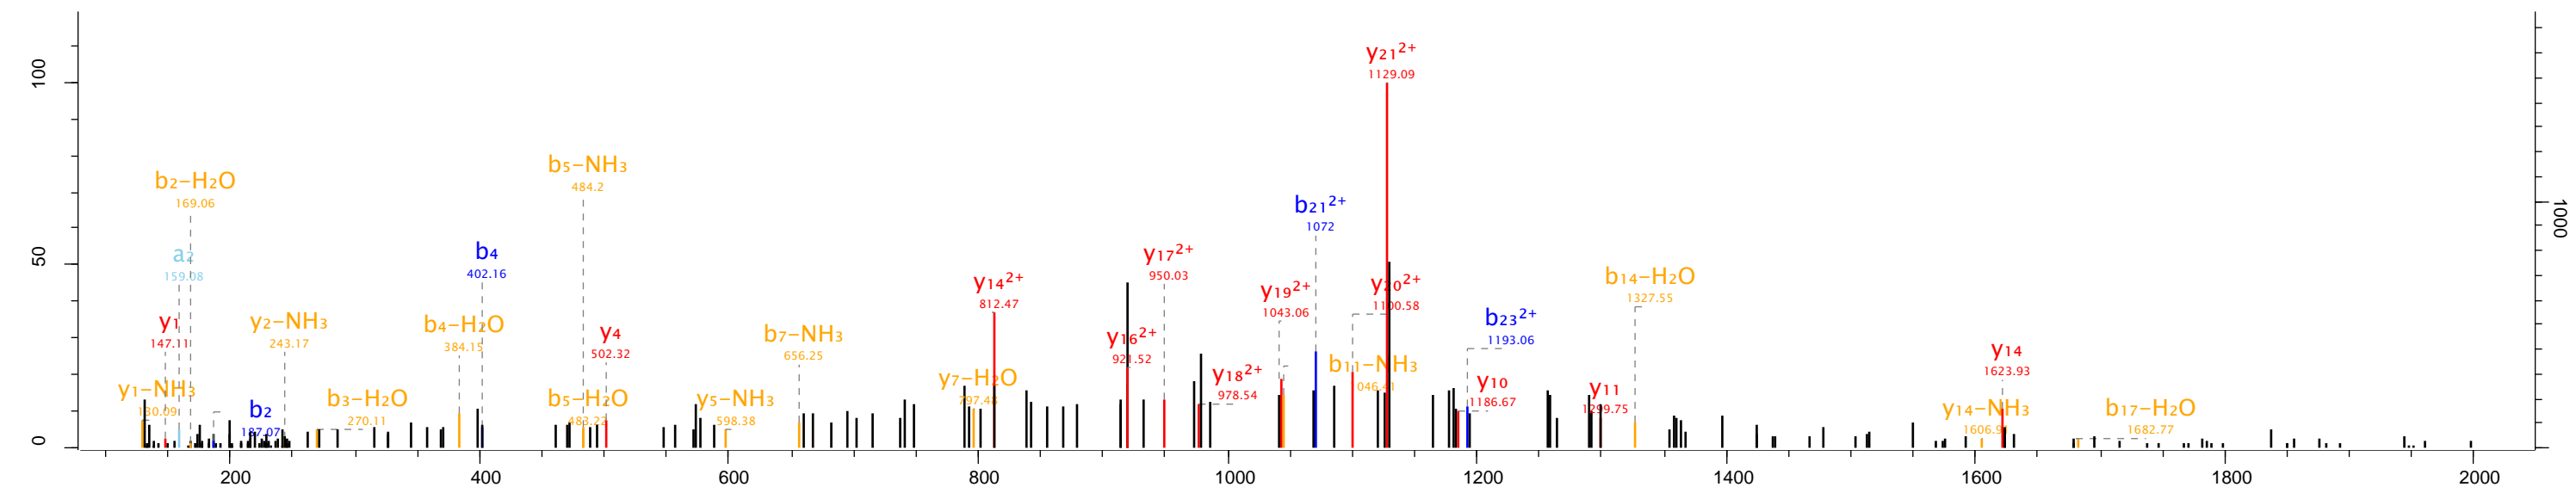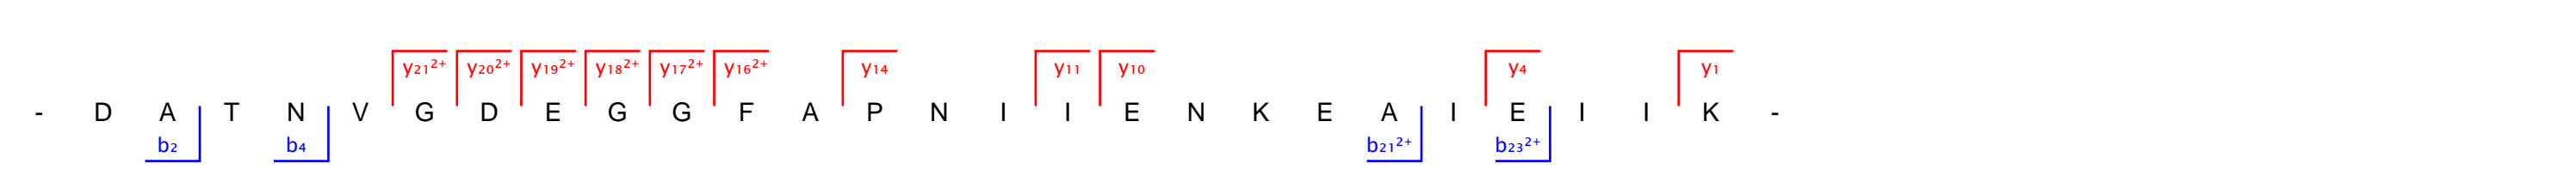

Spectral Annotation for Single-Peptide IDs between Single D11 Cells using Q-OT-LIT

Raw file 2015-01-08\_CL04\_Blastomere-15 Scan 41466 Method ITMS; HCD Score 86.7 m/z 717.82

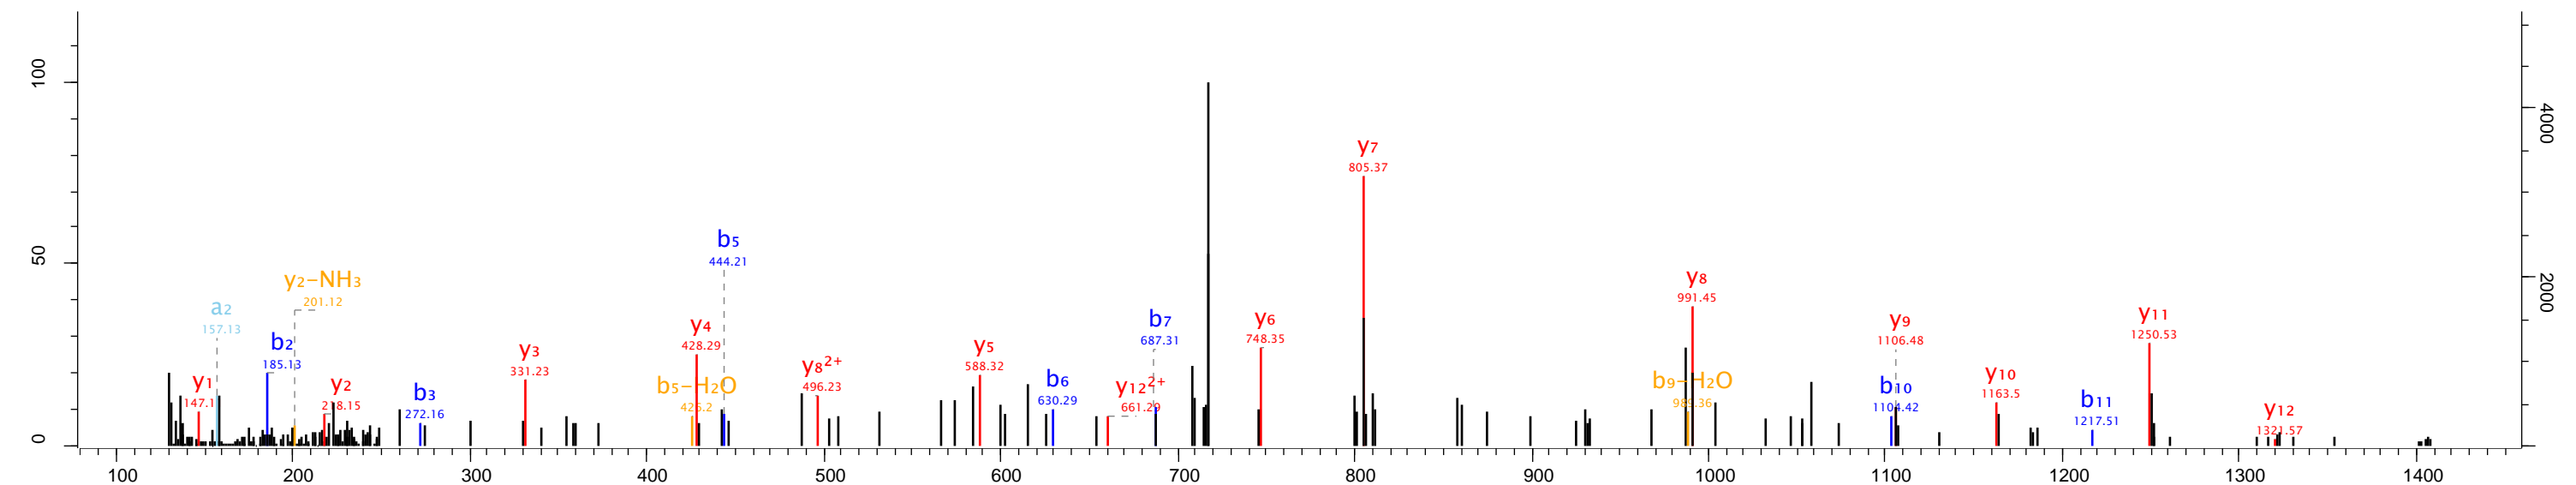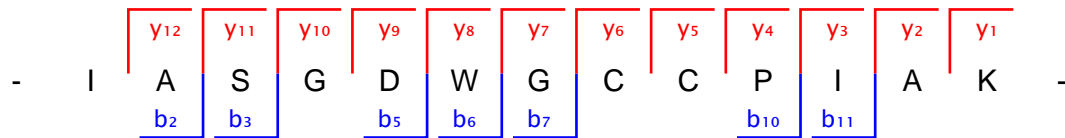

Spectral Annotation for Single-Peptide IDs between Single D11 Cells using Q-OT-LIT

Raw file Scan Method Score m/z  
 2015-01-08\_CL04\_Blastomere-15 41518 ITMS; HCD 75.48 666.85

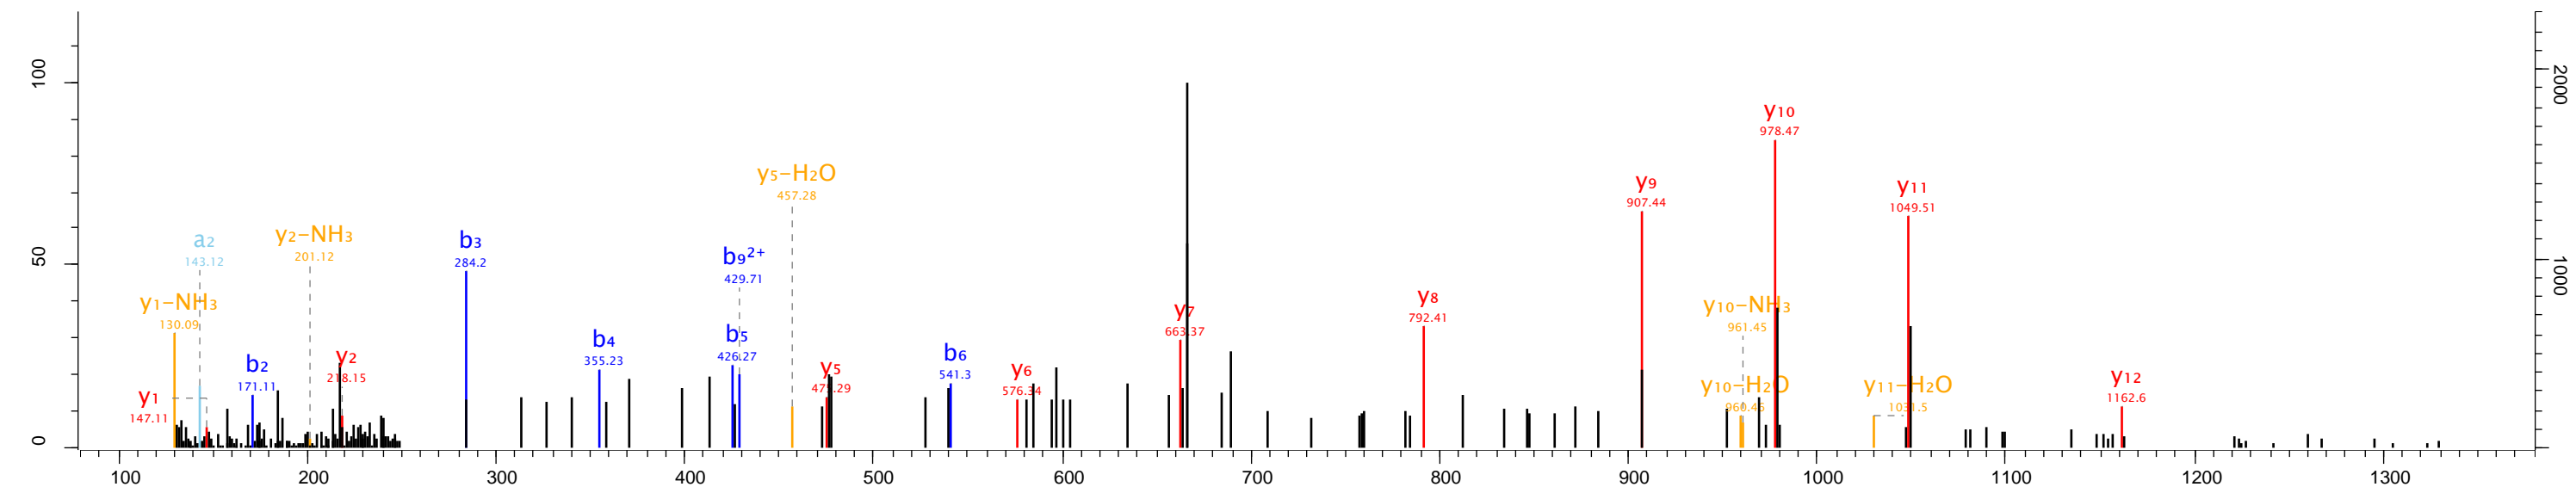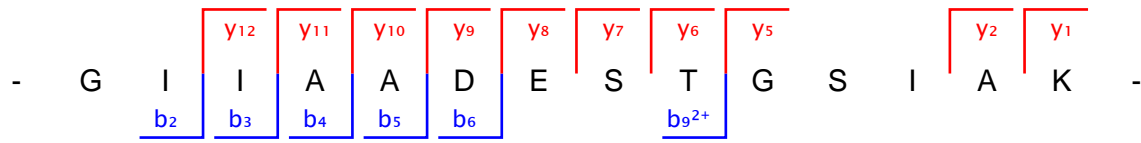

Spectral Annotation for Single-Peptide IDs between Single D11 Cells using Q-OT-LIT



Raw file 2015-01-08\_CL04\_Blastomere-15 Scan 41613 Method ITMS; HCD Score 66.14 m/z 920.47

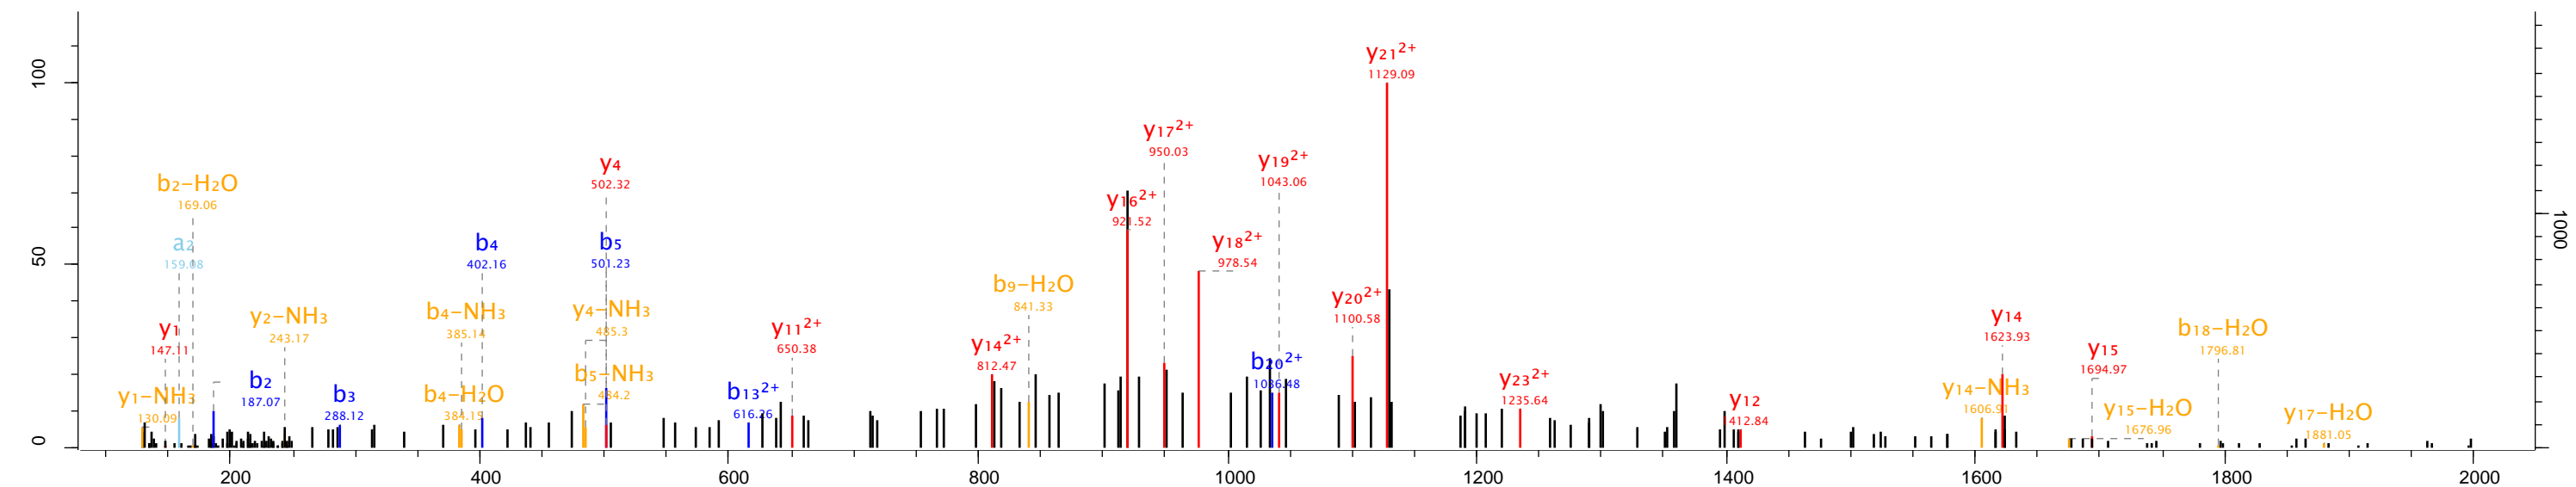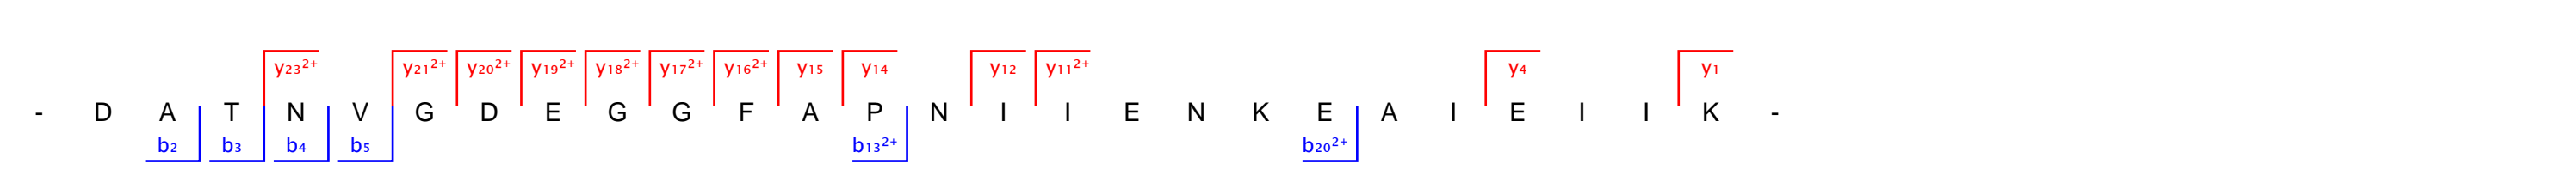

Spectral Annotation for Single-Peptide IDs between Single D11 Cells using Q-OT-LIT

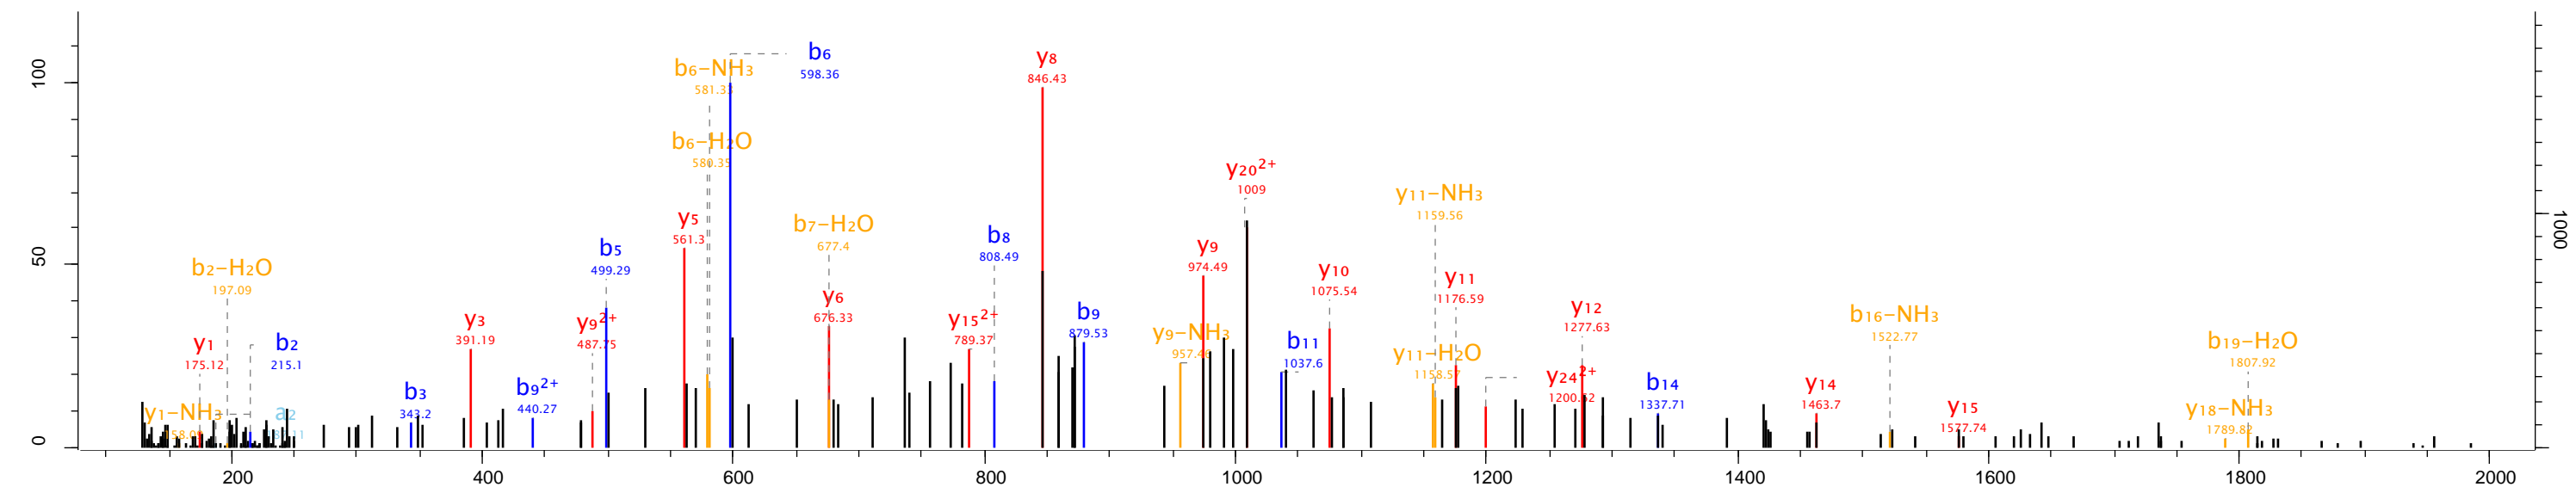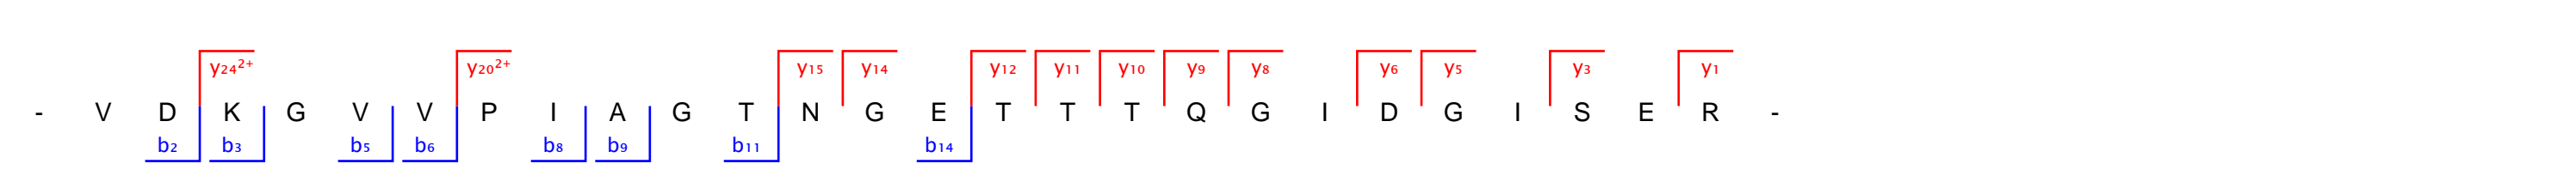

Spectral Annotation for Single-Peptide IDs between Single D11 Cells using Q-OT-LIT

Raw file 2015-01-08\_CL04\_Blastomere-15 Scan 41802 Method ITMS; HCD Score 56.29 m/z 748.35

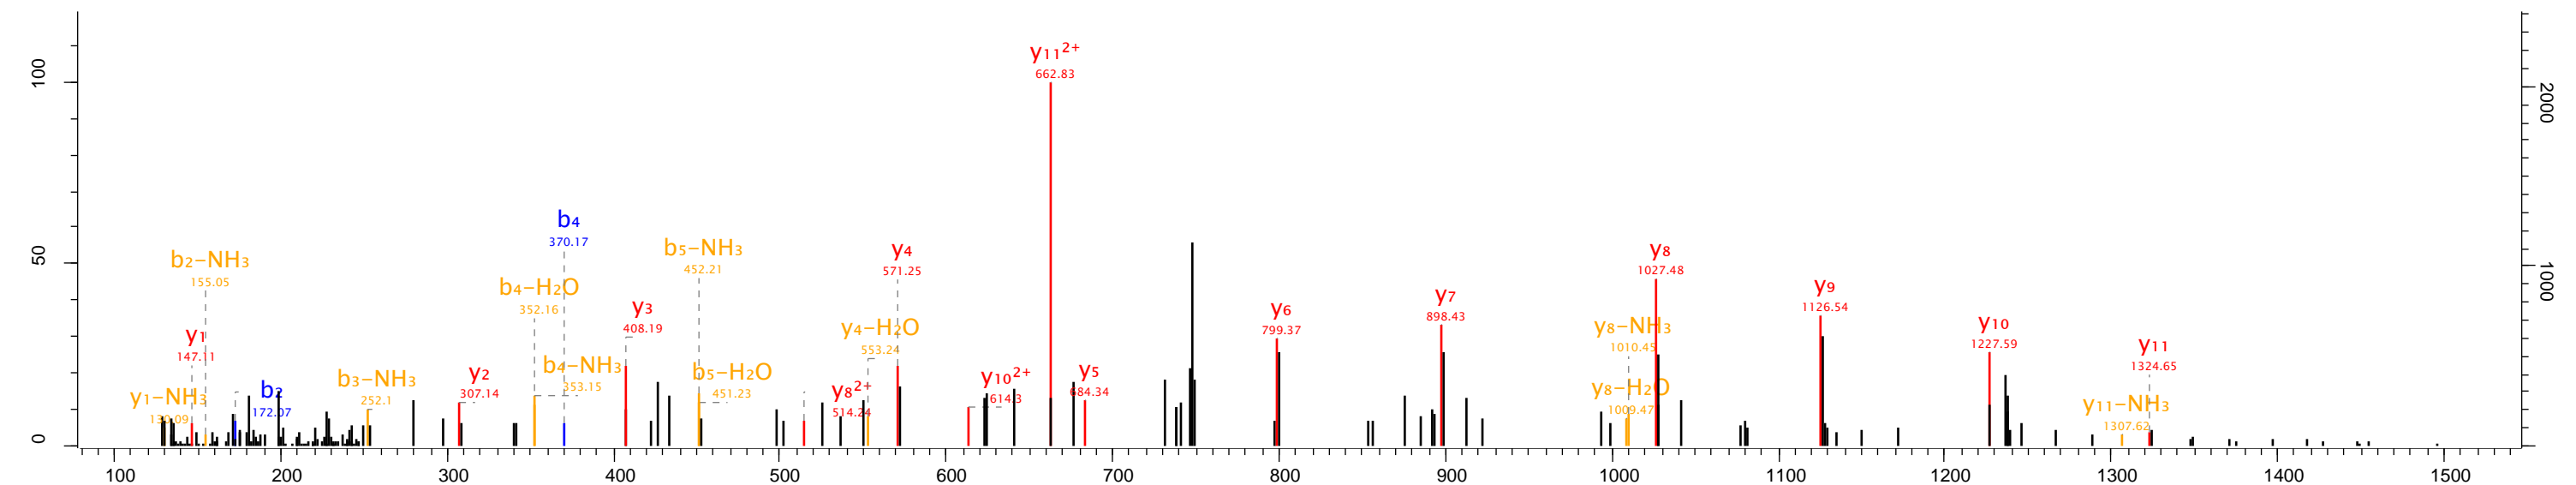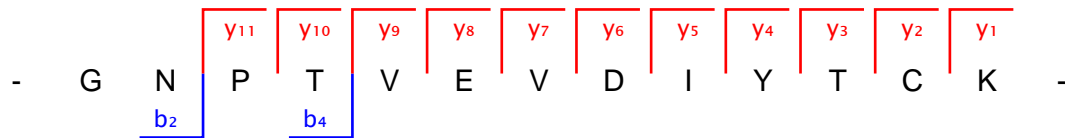

Spectral Annotation for Single-Peptide IDs between Single D11 Cells using Q-OT-LIT

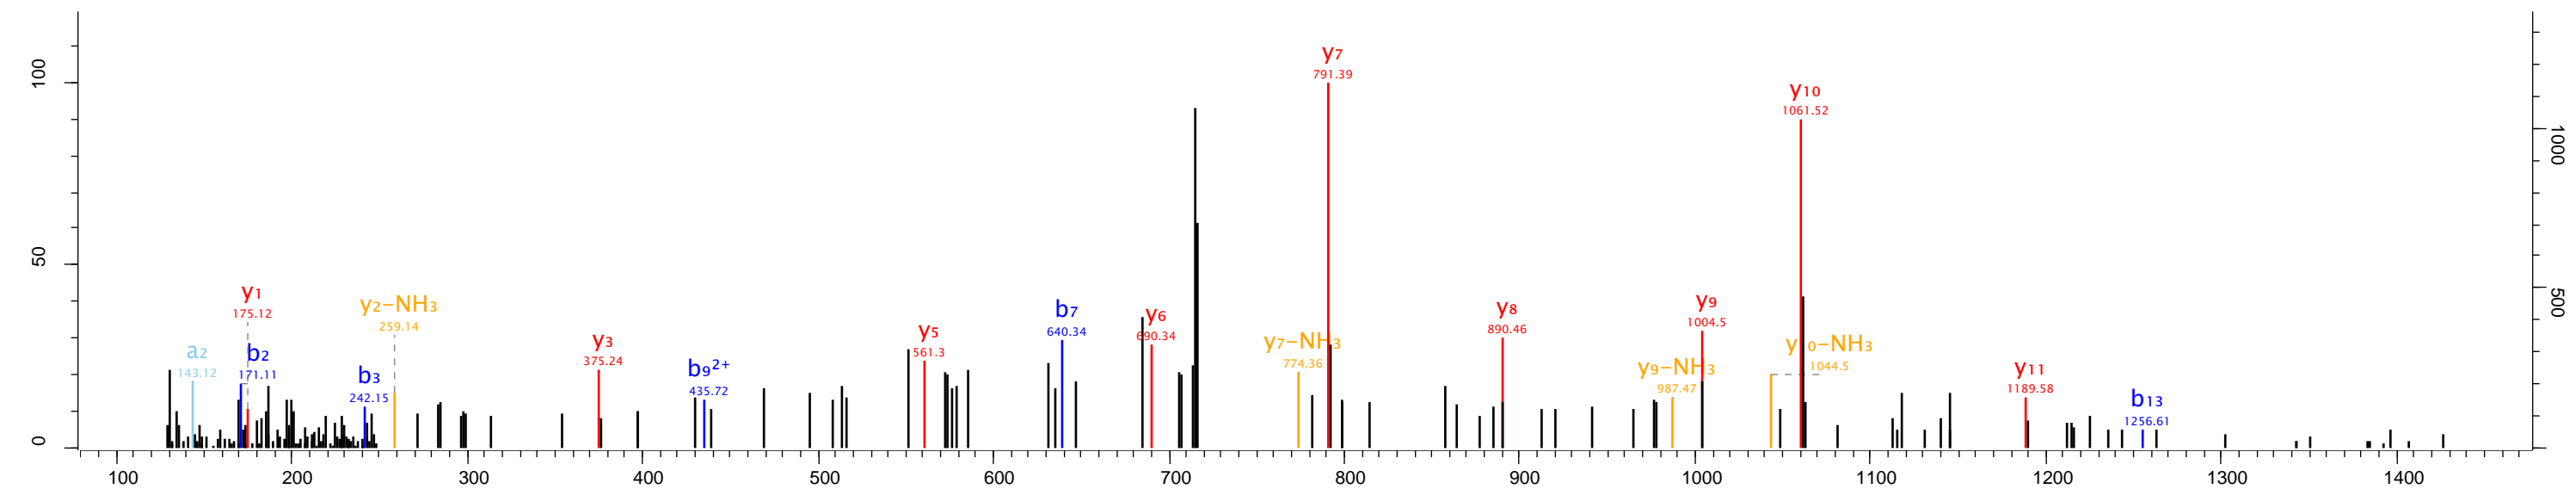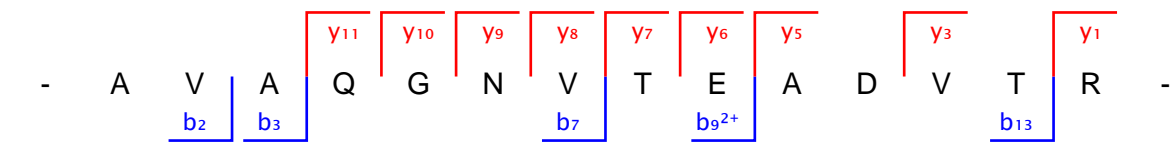

Raw file 2015-01-08\_CL04\_Blastomere-15 Scan 42043 Method ITMS; HCD Score 79.61 m/z 715.86

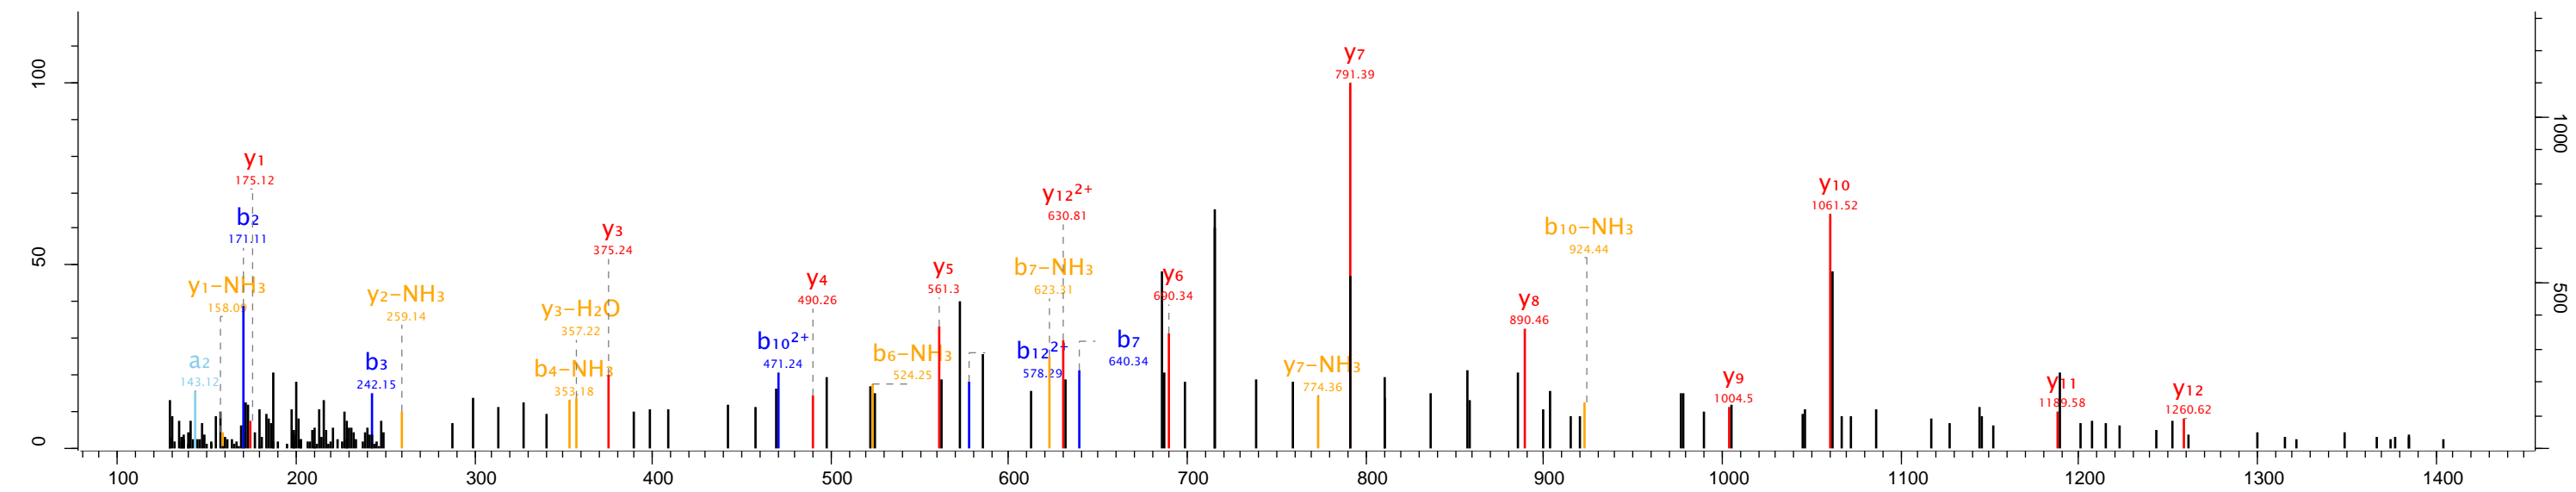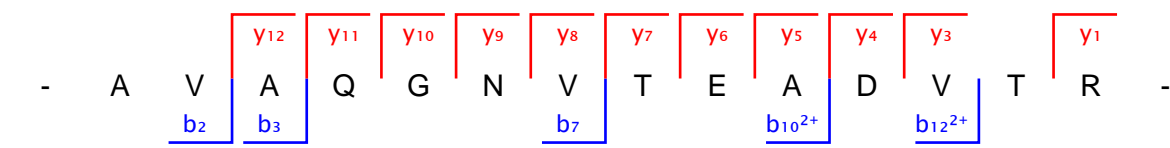

Spectral Annotation for Single-Peptide IDs between Single D11 Cells using Q-OT-LIT

Raw file 2015-01-08\_CL04\_Blastomere-15 Scan 42057 Method ITMS; HCD Score 42.86 m/z 919.8

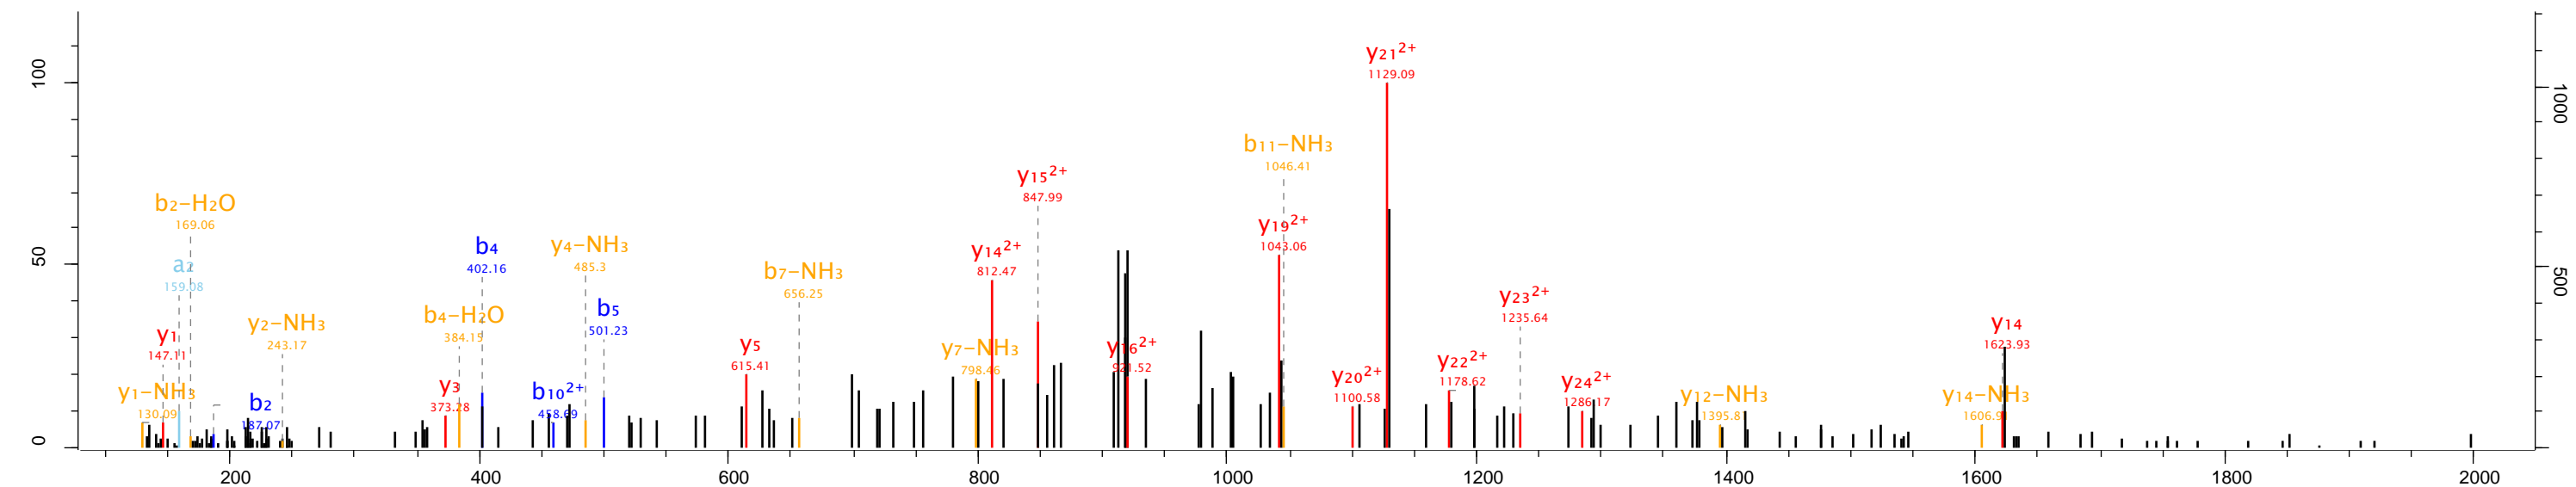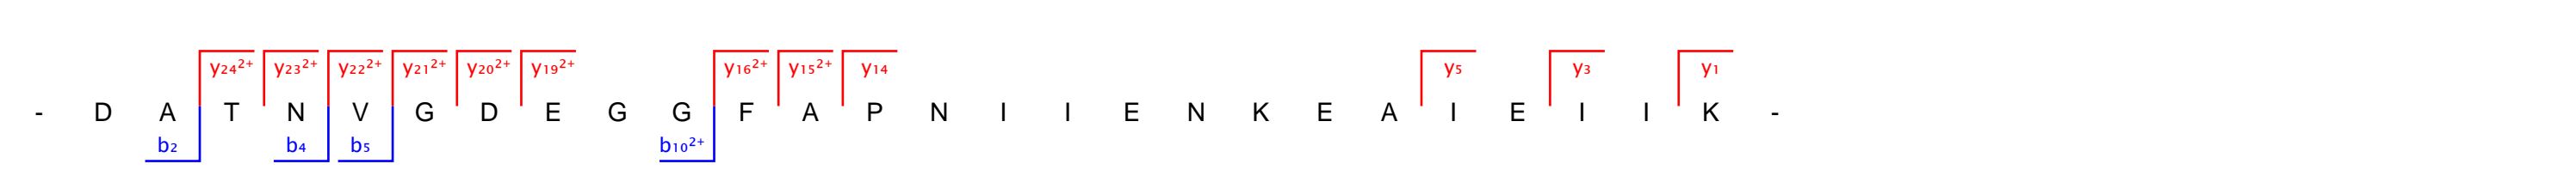

Spectral Annotation for Single-Peptide IDs between Single D11 Cells using Q-OT-LIT

Raw file: 2015-01-08\_CL04\_Blastomere-15  
 Scan: 42135 Method: ITMS; HCD Score: 76.05 m/z: 920.13

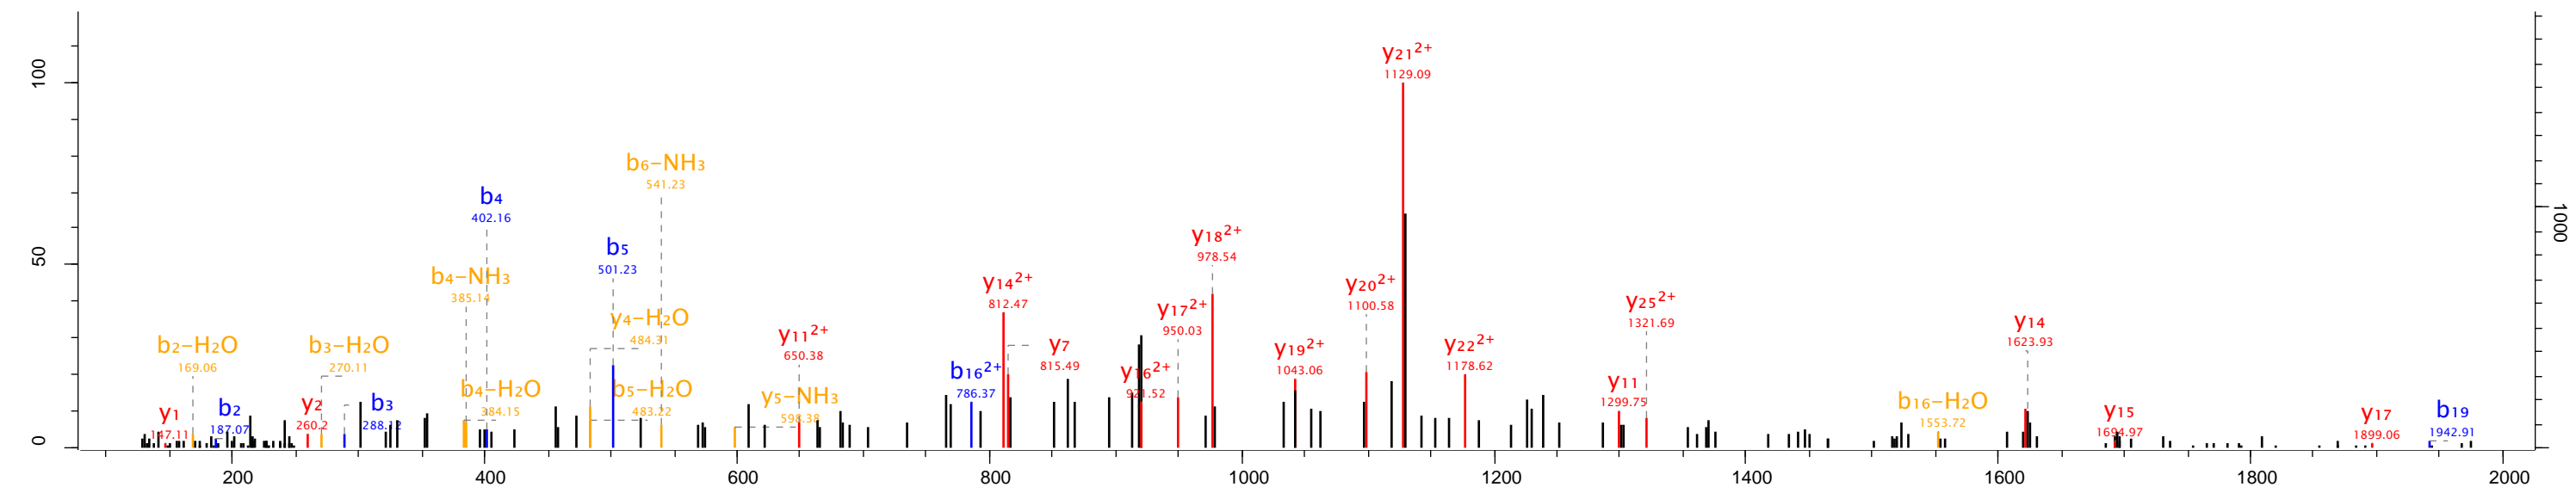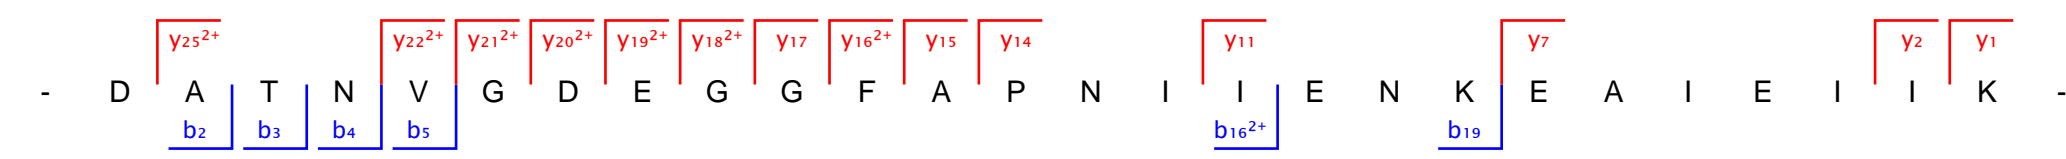

Spectral Annotation for Single-Peptide IDs between Single D11 Cells using Q-OT-LIT

Raw file 2015-01-08\_CL04\_Blastomere-15 Scan 42258 Method ITMS; HCD Score 57.67 m/z 928.44

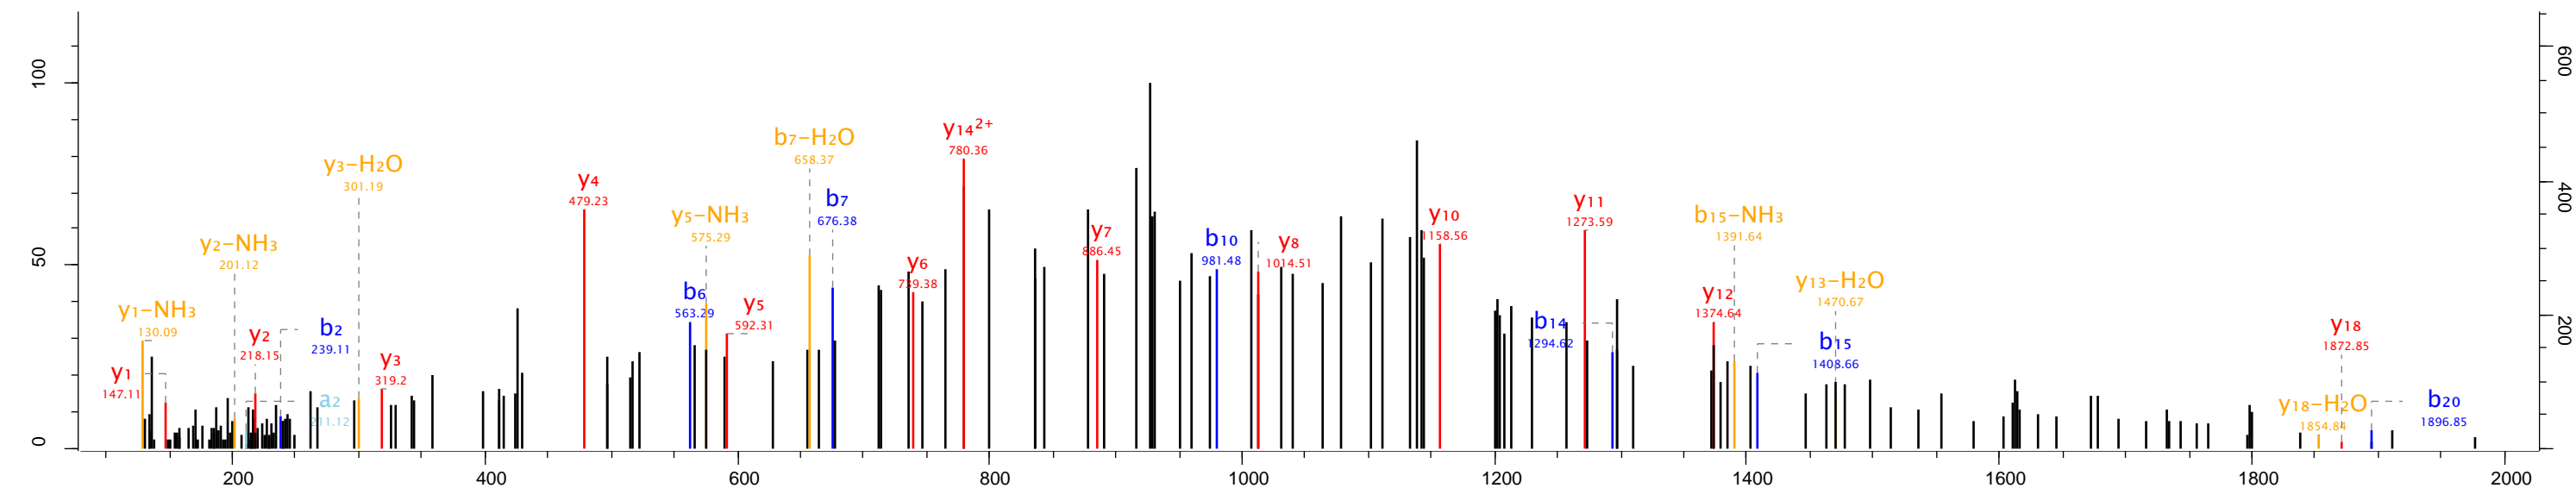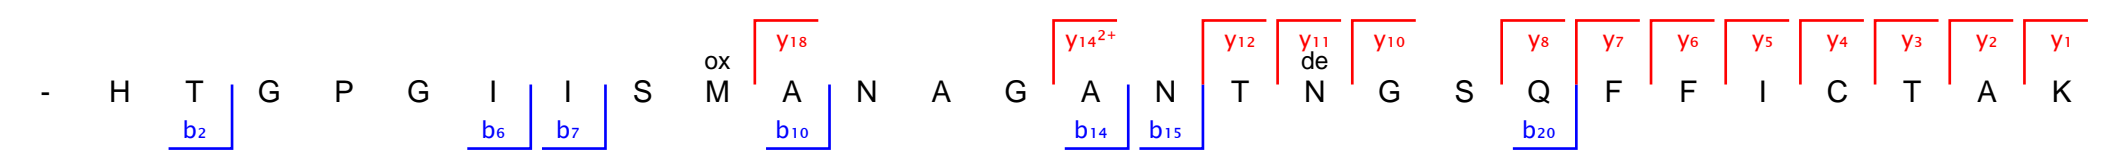

Spectral Annotation for Single-Peptide IDs between Single D11 Cells using Q-OT-LIT



Raw file: 2015-01-08\_CL04\_Blastomere-15  
 Scan: 42372 Method: ITMS; HCD Score: 61.53 m/z: 872.77

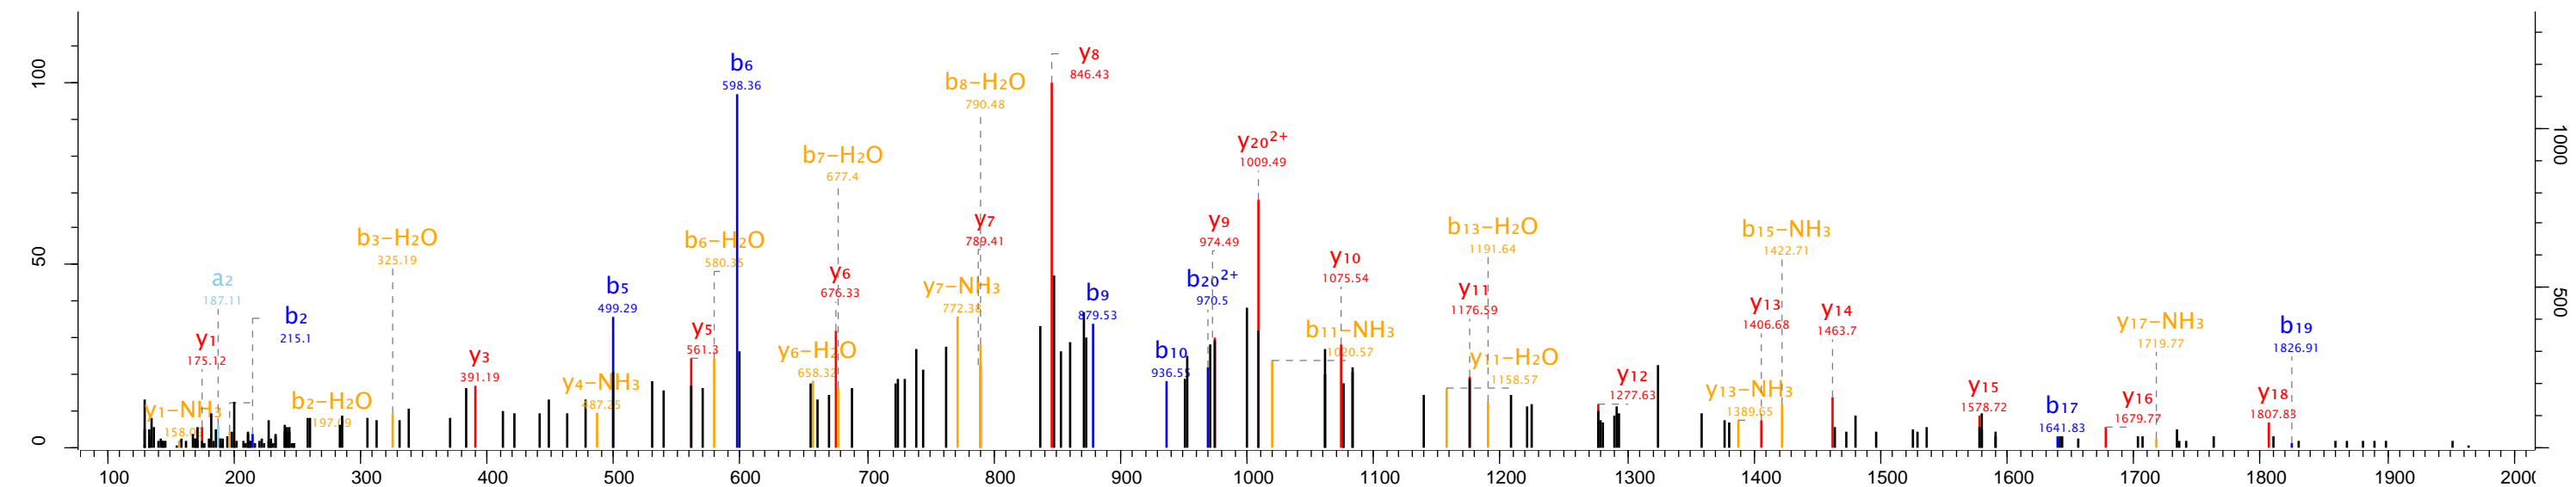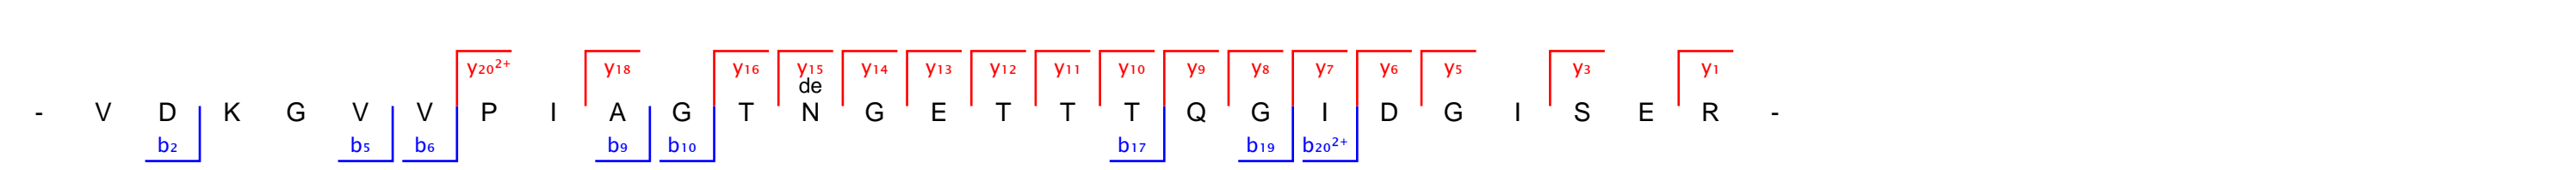

Spectral Annotation for Single-Peptide IDs between Single D11 Cells using Q-OT-LIT

Raw file: 2015-01-08\_CL04\_Blastomere-15  
 Scan: 42771 Method: ITMS; HCD Score: 36.61 m/z: 1008.81

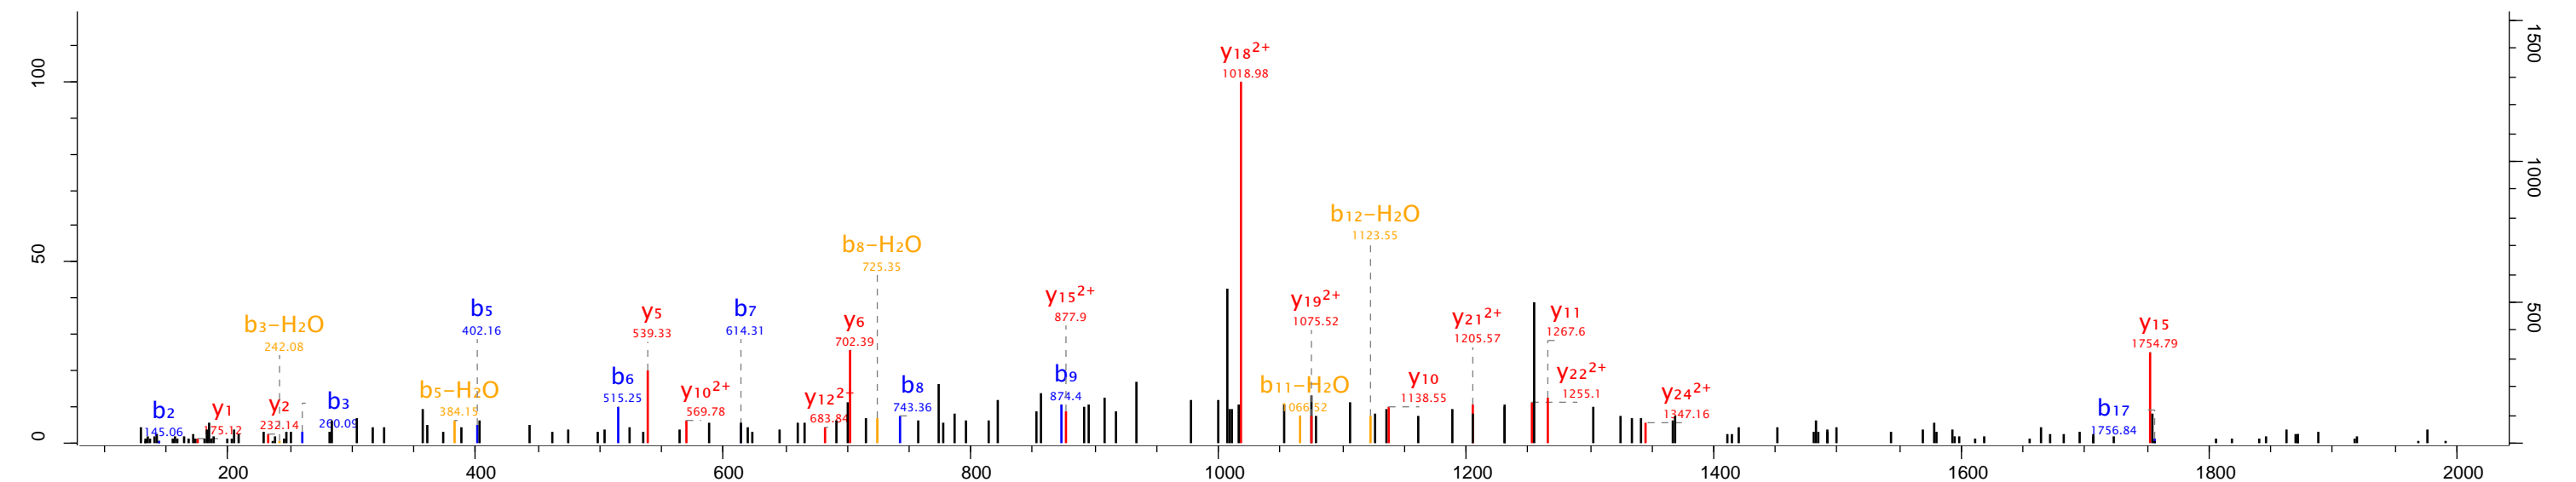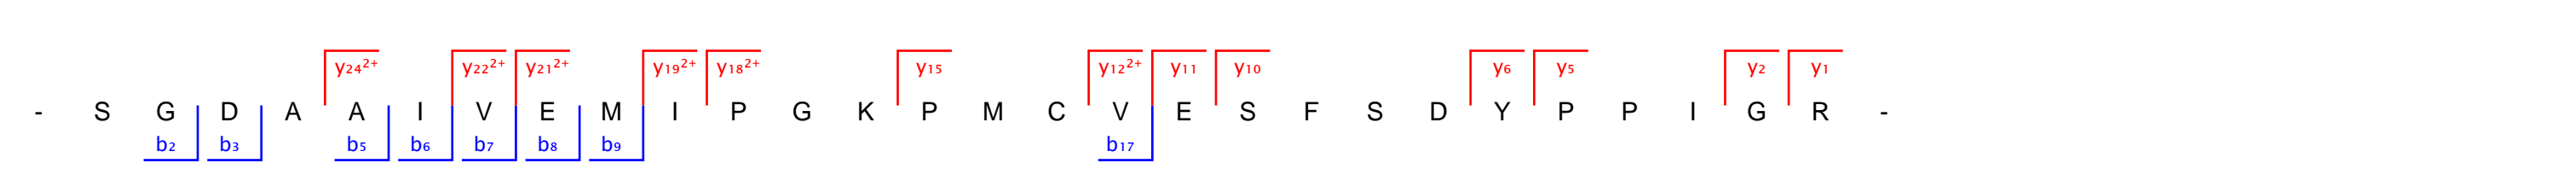

Spectral Annotation for Single-Peptide IDs between Single D11 Cells using Q-OT-LIT

Raw file 2015-01-08\_CL04\_Blastomere-15 Scan 42781 Method ITMS; HCD Score 54.01 m/z 794.37

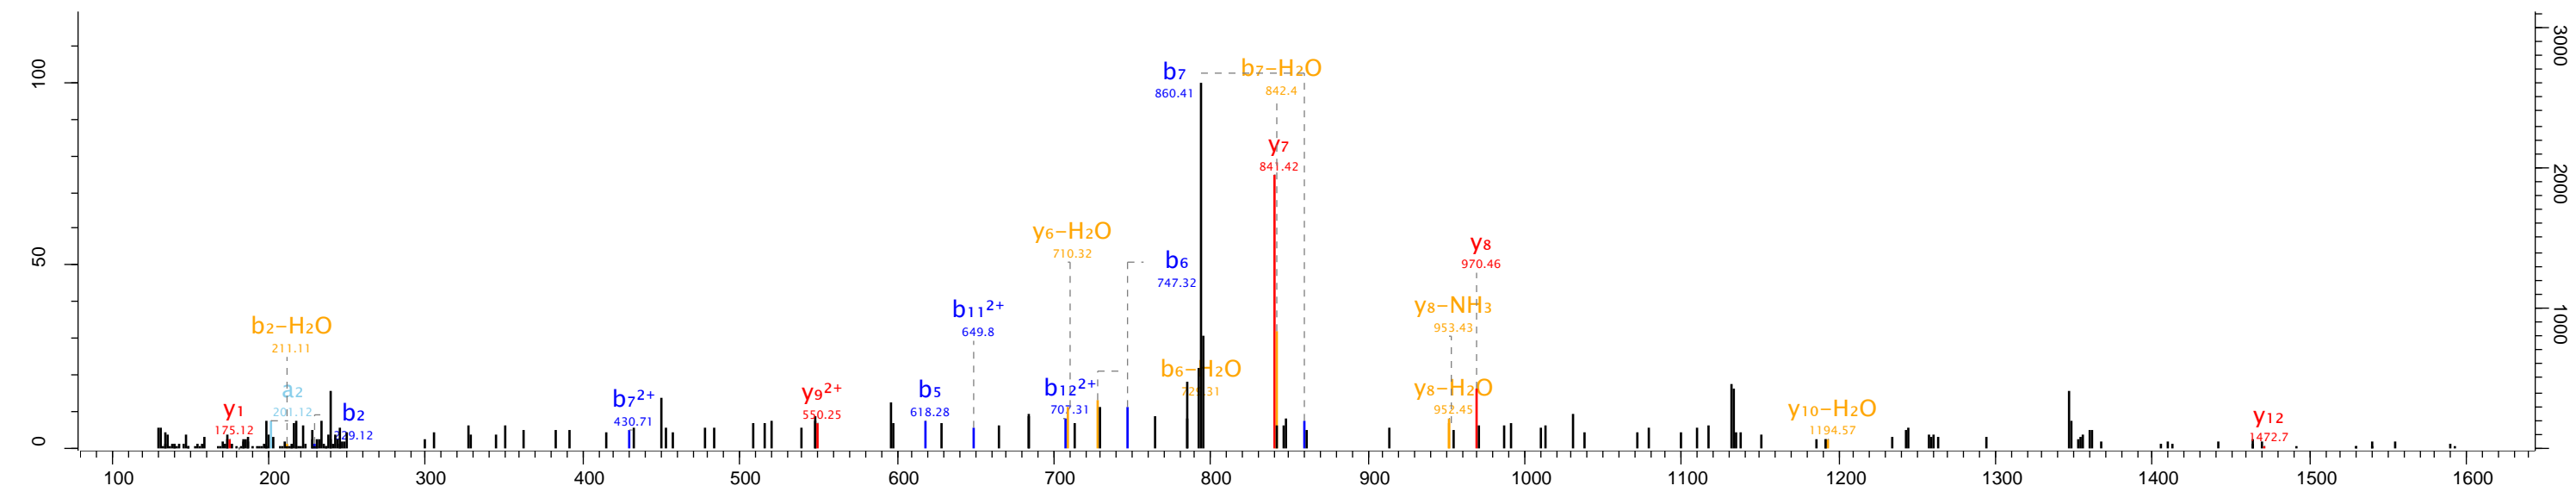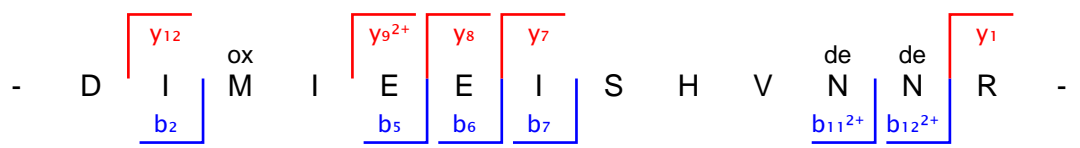

Spectral Annotation for Single-Peptide IDs between Single D11 Cells using Q-OT-LIT

Raw file 2015-01-08\_CL04\_Blastomere-15 Scan 42820 Method ITMS; HCD Score 81.68 m/z 976.51

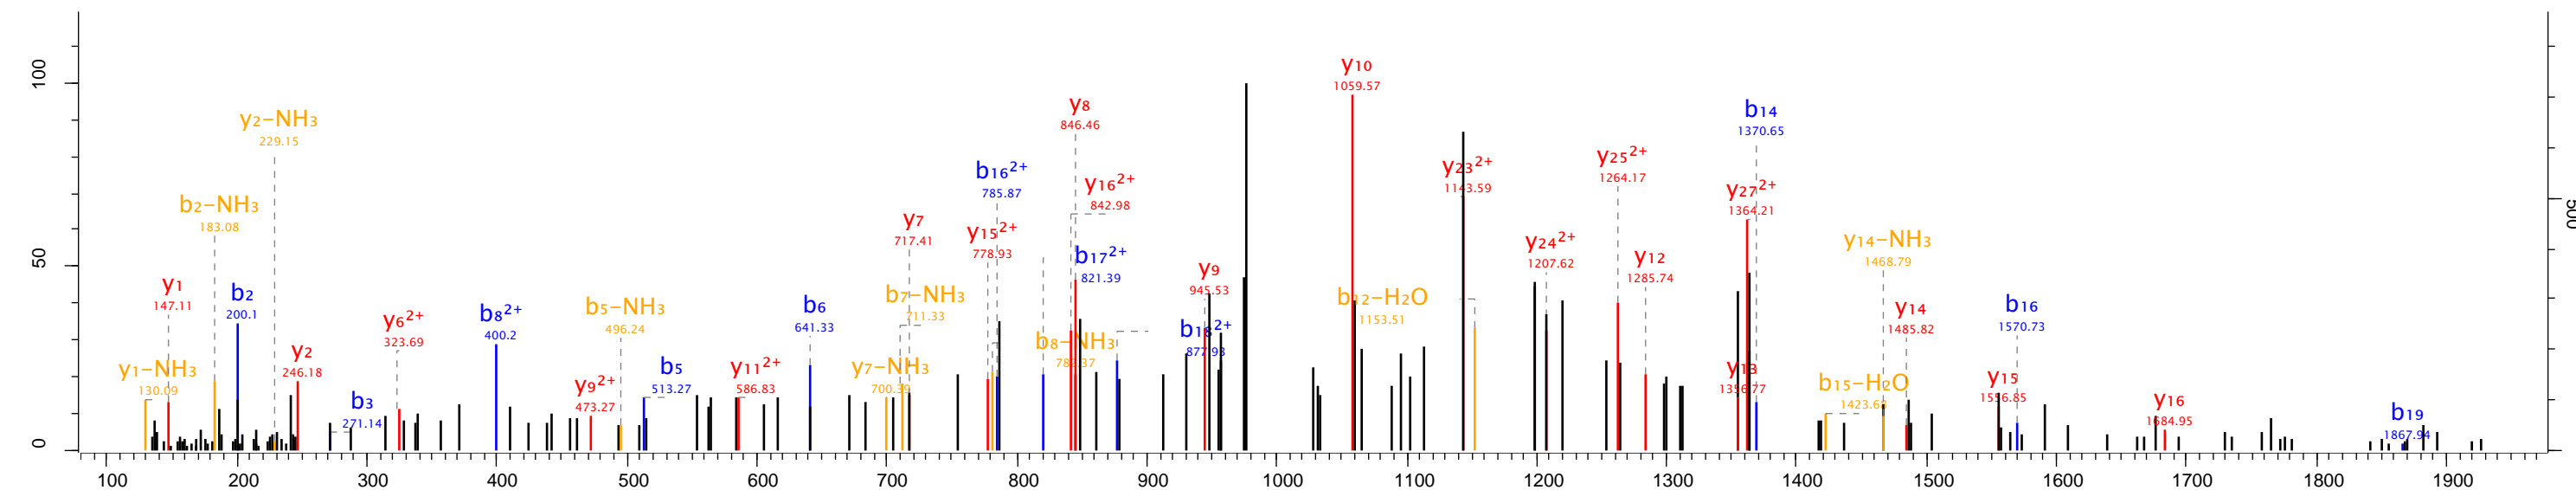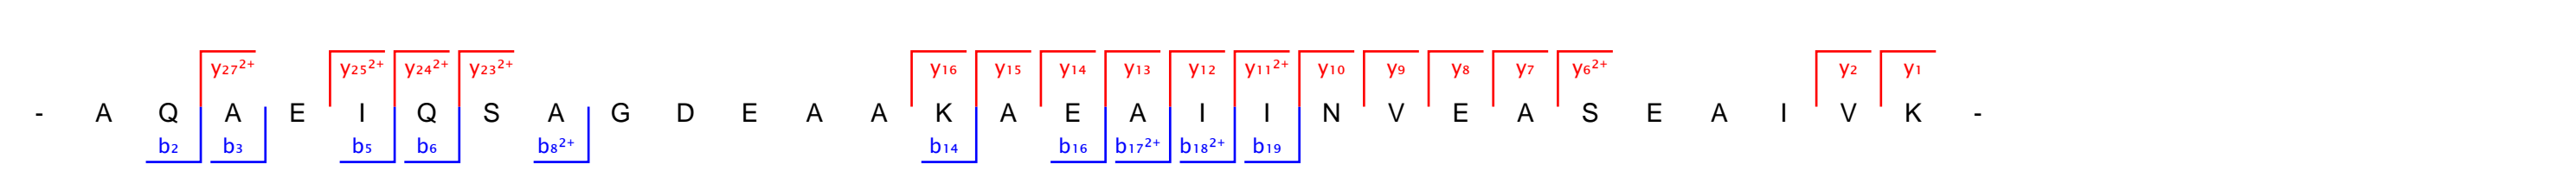

Raw file 2015-01-08\_CL04\_Blastomere-15 Scan 42889 Method ITMS; HCD Score 50.72 m/z 1013.82

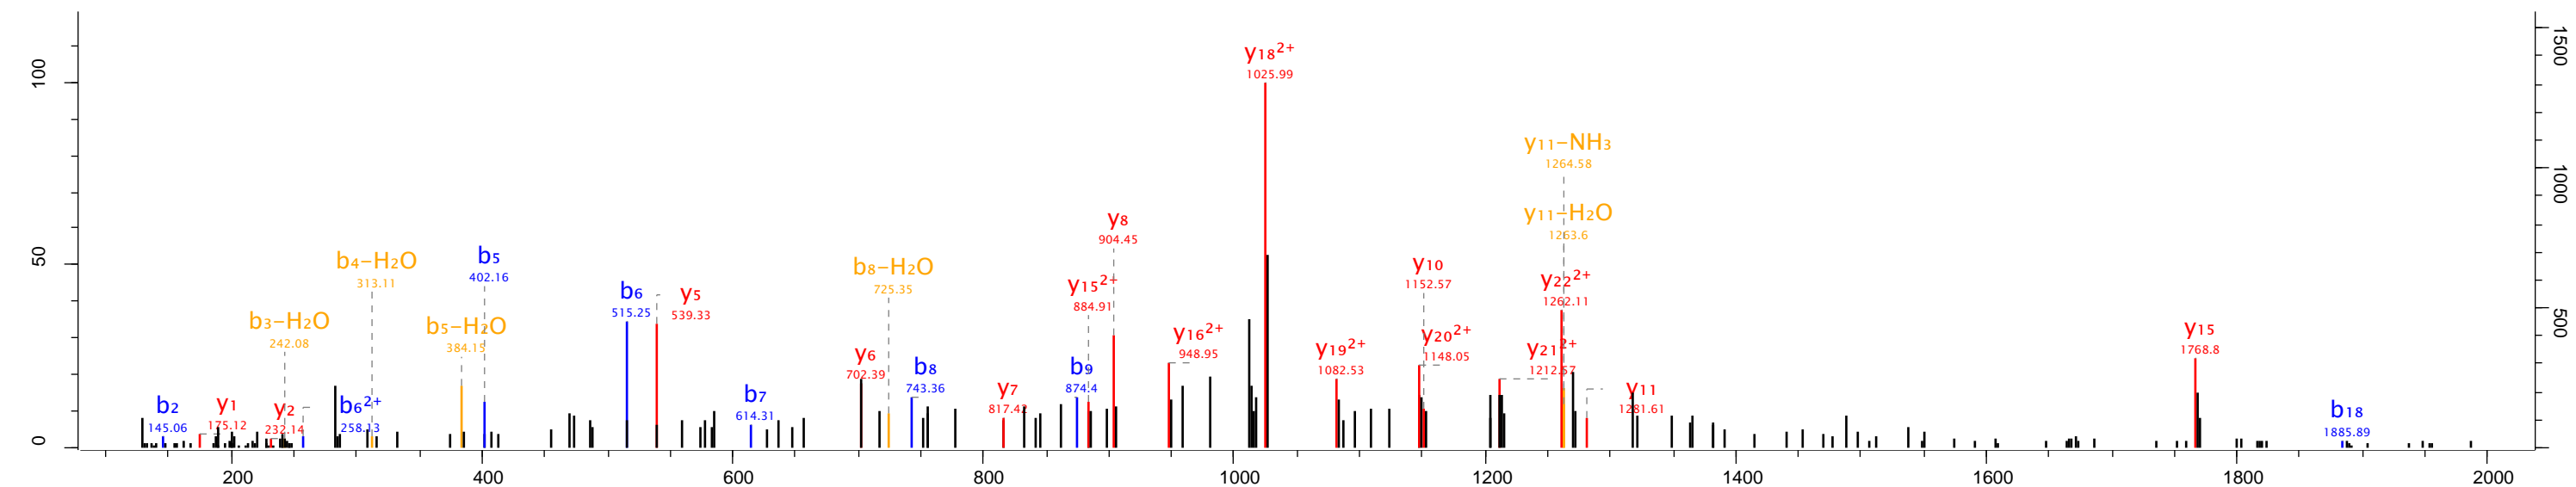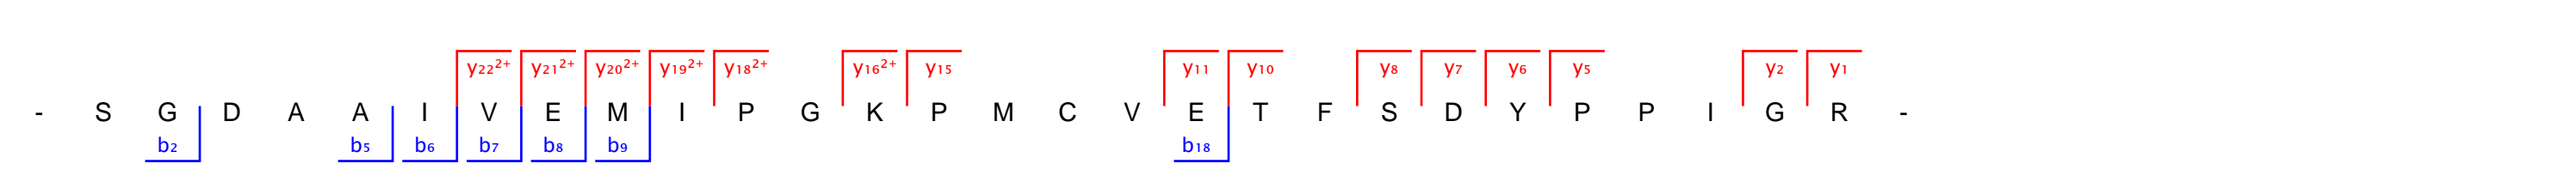

Spectral Annotation for Single-Peptide IDs between Single D11 Cells using Q-OT-LIT

Raw file: 2015-01-08\_CL04\_Blastomere-15  
 Scan: 42891 Method: ITMS; HCD Score: 55.16 m/z: 1008.81

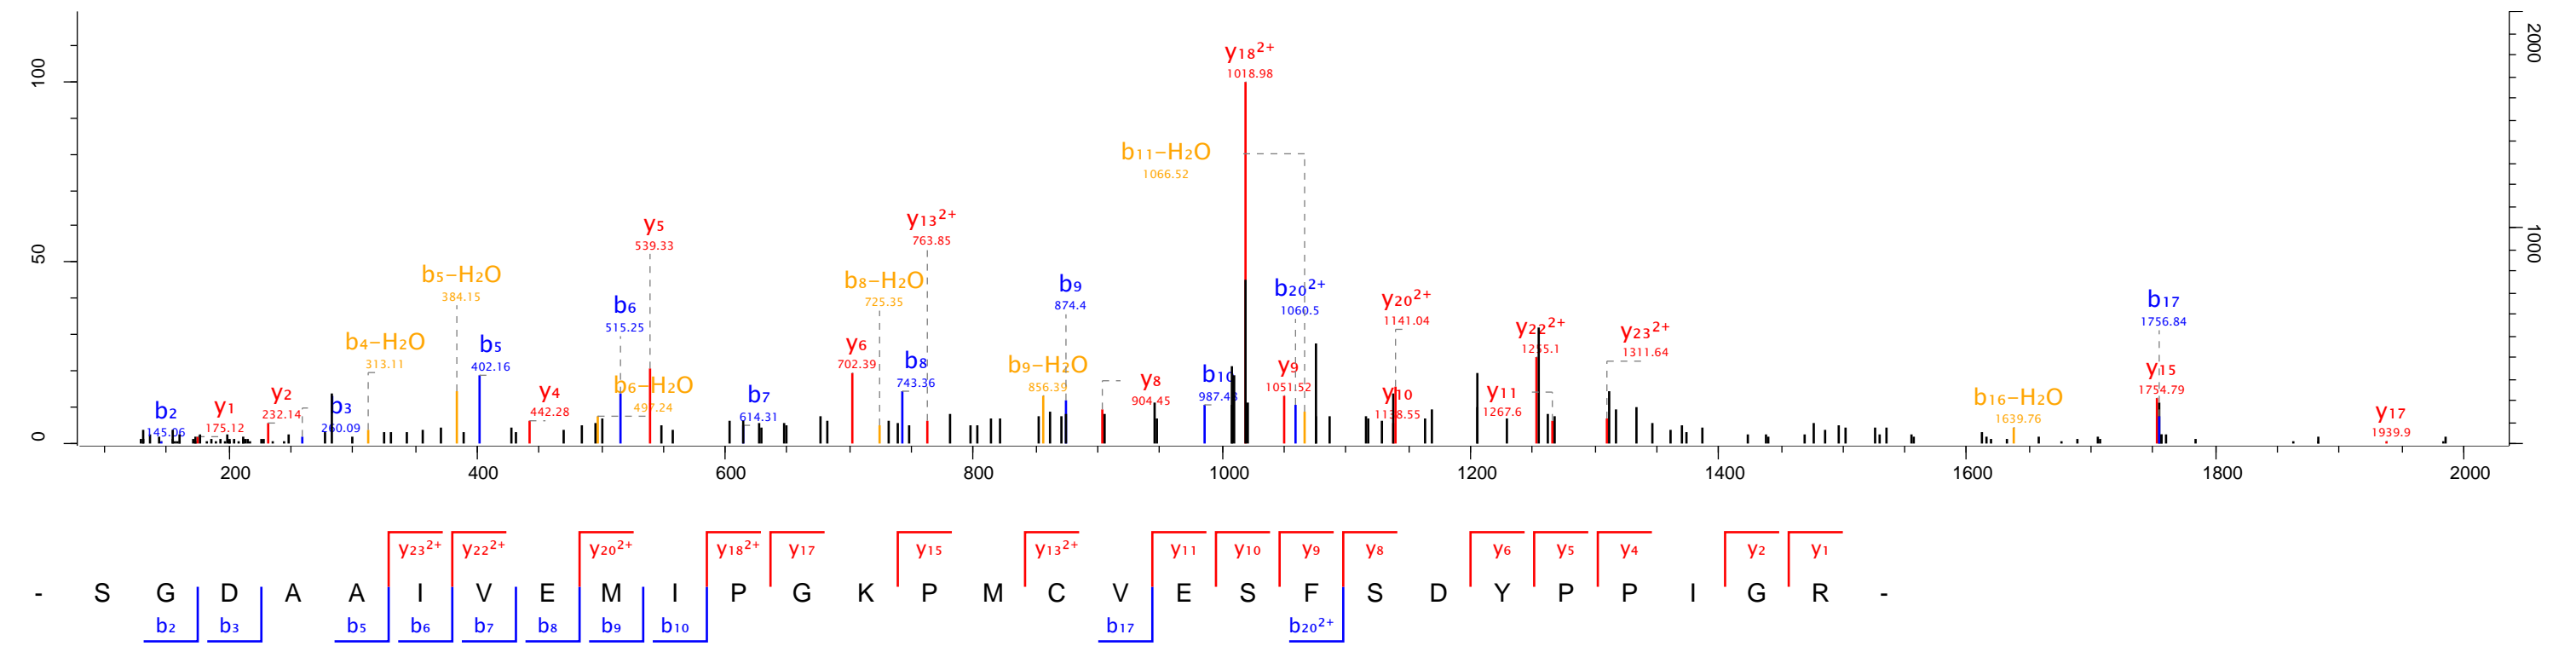

Spectral Annotation for Single-Peptide IDs between Single D11 Cells using Q-OT-LIT

Raw file 2015-01-08\_CL04\_Blastomere-15 Scan 42943 Method ITMS; HCD Score 101.73 m/z 976.84

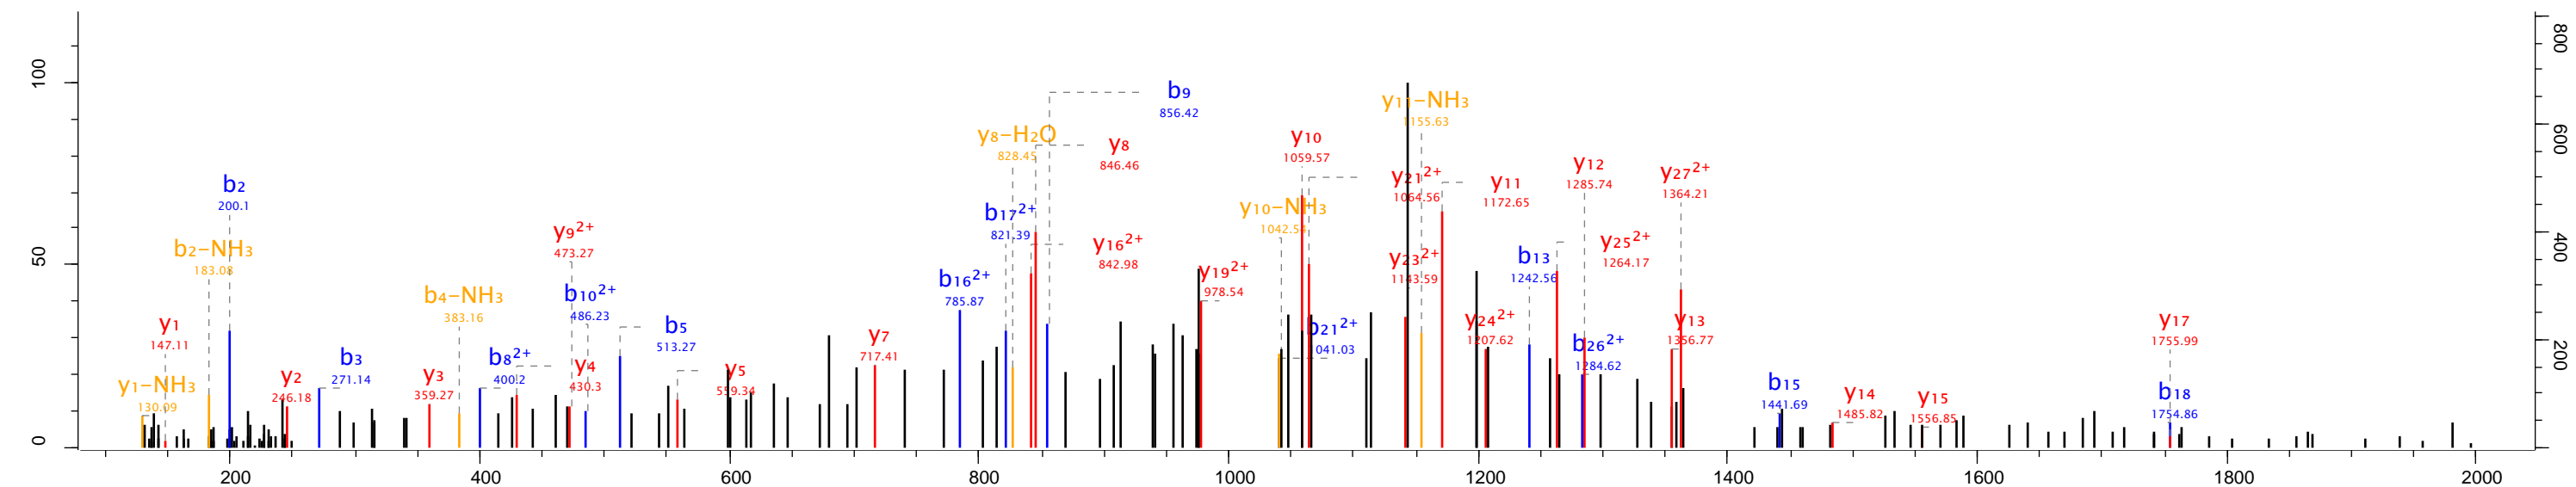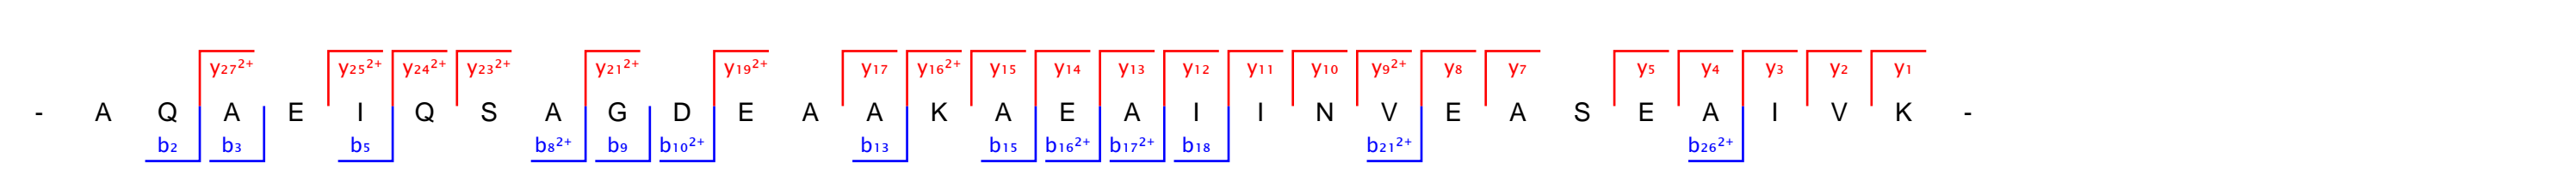

Spectral Annotation for Single-Peptide IDs between Single D11 Cells using Q-OT-LIT

Raw file 2015-01-08\_CL04\_Blastomere-15 Scan 43050 Method ITMS; HCD Score 38.78 m/z 1009.14

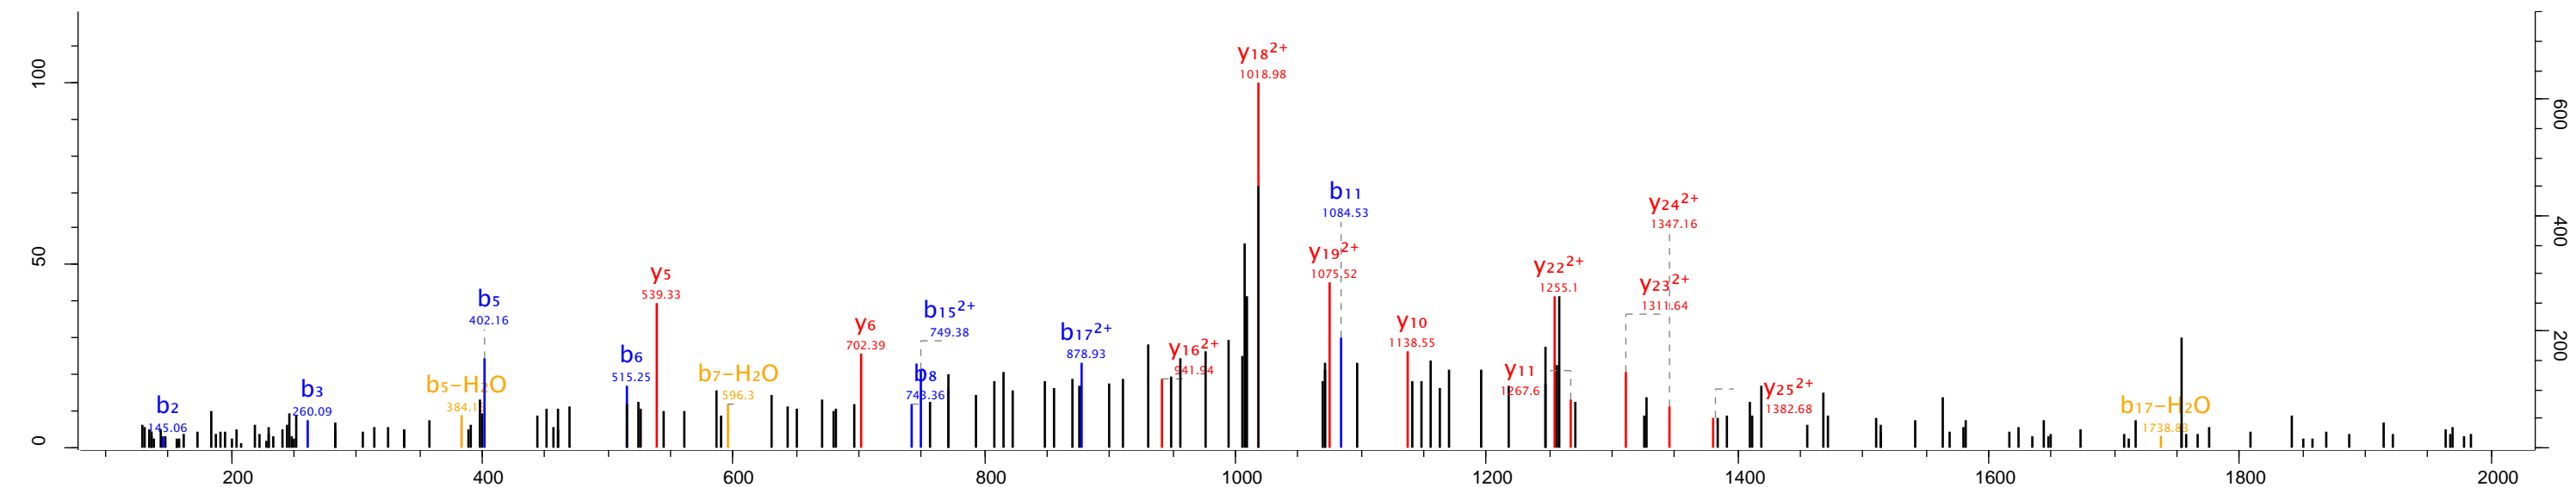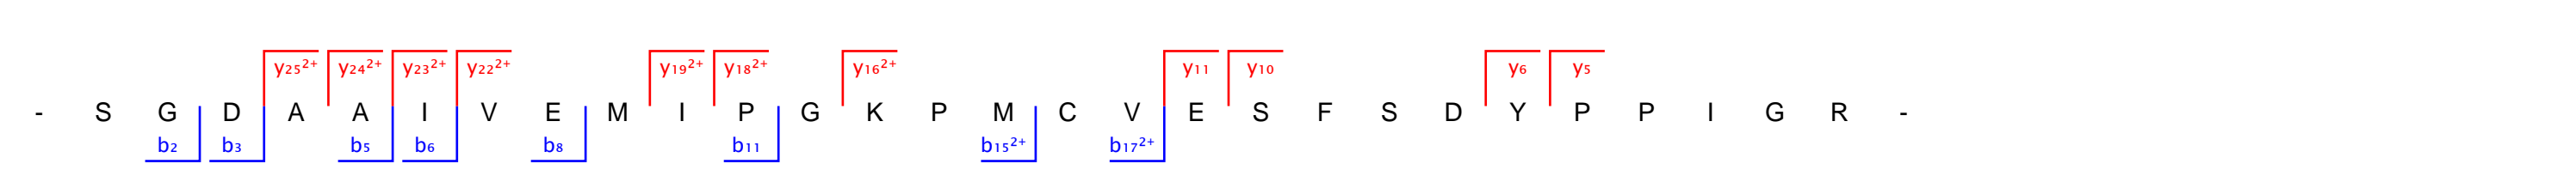

Spectral Annotation for Single-Peptide IDs between Single D11 Cells using Q-OT-LIT



Raw file 2015-01-08\_CL04\_Blastomere-15 Scan 43159 Method ITMS; HCD Score 32.78 m/z 1013.82

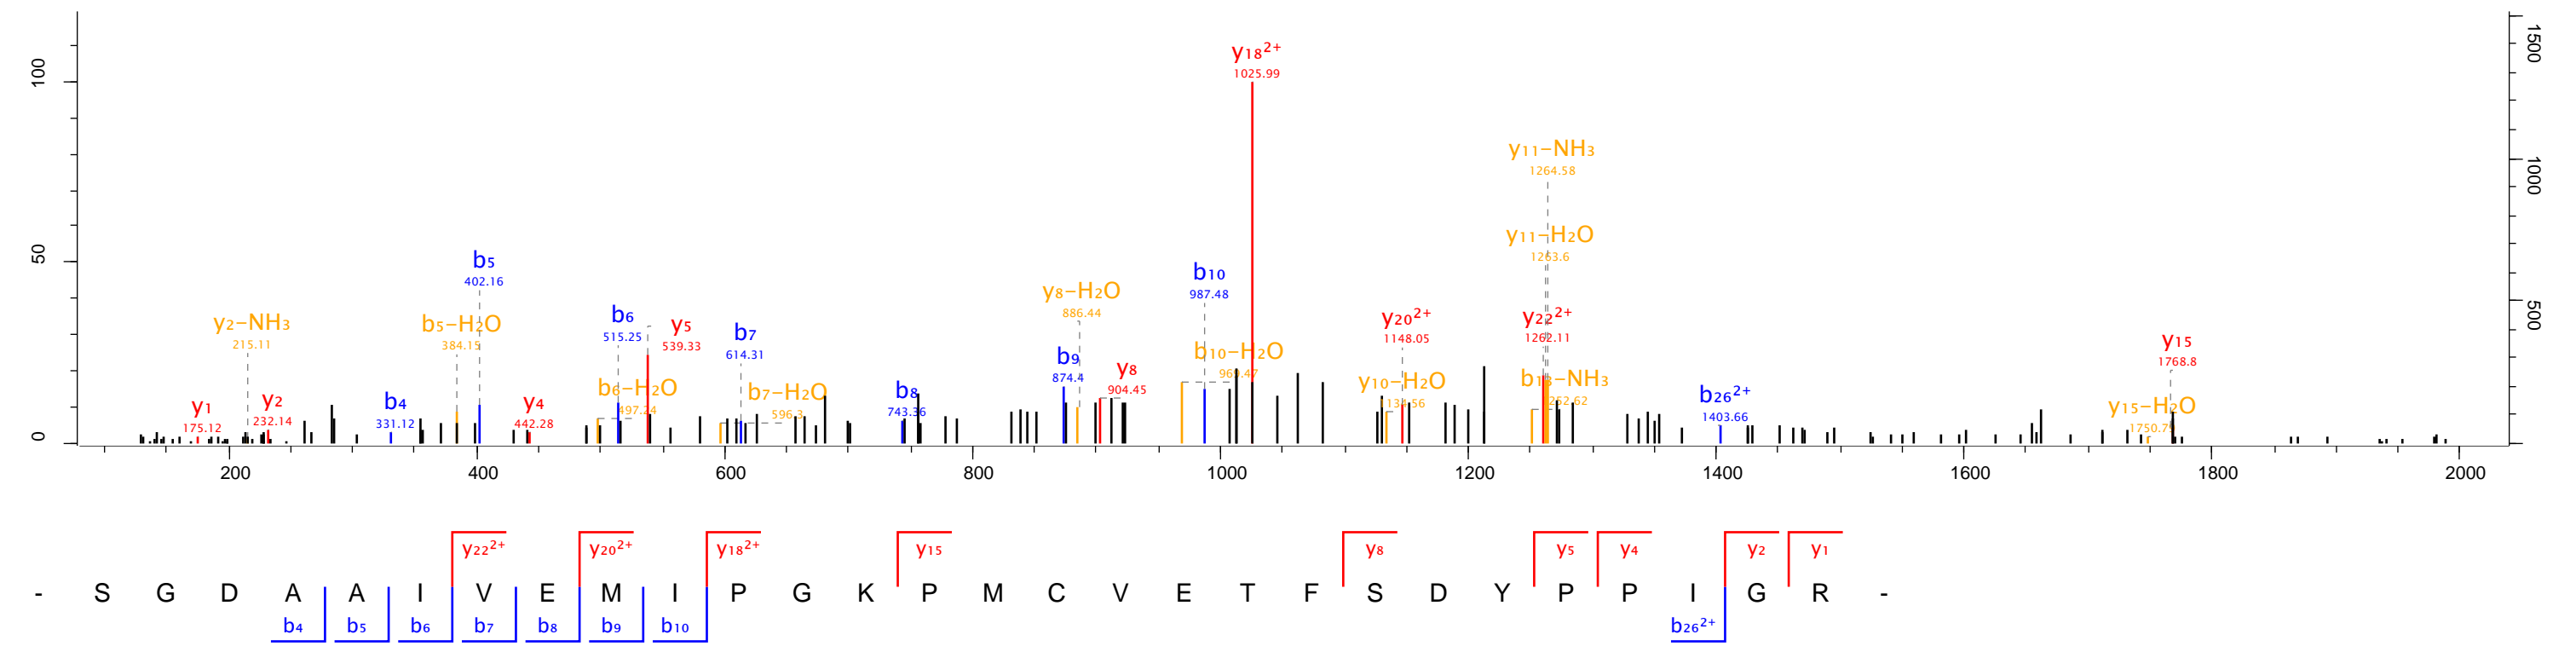

- S G D A A I V E M I P G K P M C V E T F S D Y P P I G R -

Fragmentation labels below the sequence:

- Red labels (y ions):  $y_{22}^{2+}$ ,  $y_{20}^{2+}$ ,  $y_{18}^{2+}$ ,  $y_{15}$ ,  $y_8$ ,  $y_5$ ,  $y_4$ ,  $y_2$ ,  $y_1$
- Blue labels (b ions):  $b_4$ ,  $b_5$ ,  $b_6$ ,  $b_7$ ,  $b_8$ ,  $b_9$ ,  $b_{10}$ ,  $b_{26}^{2+}$

Raw file 2015-01-08\_CL04\_Blastomere-15 Scan 43163 Method ITMS; HCD Score 71.28 m/z 773.92

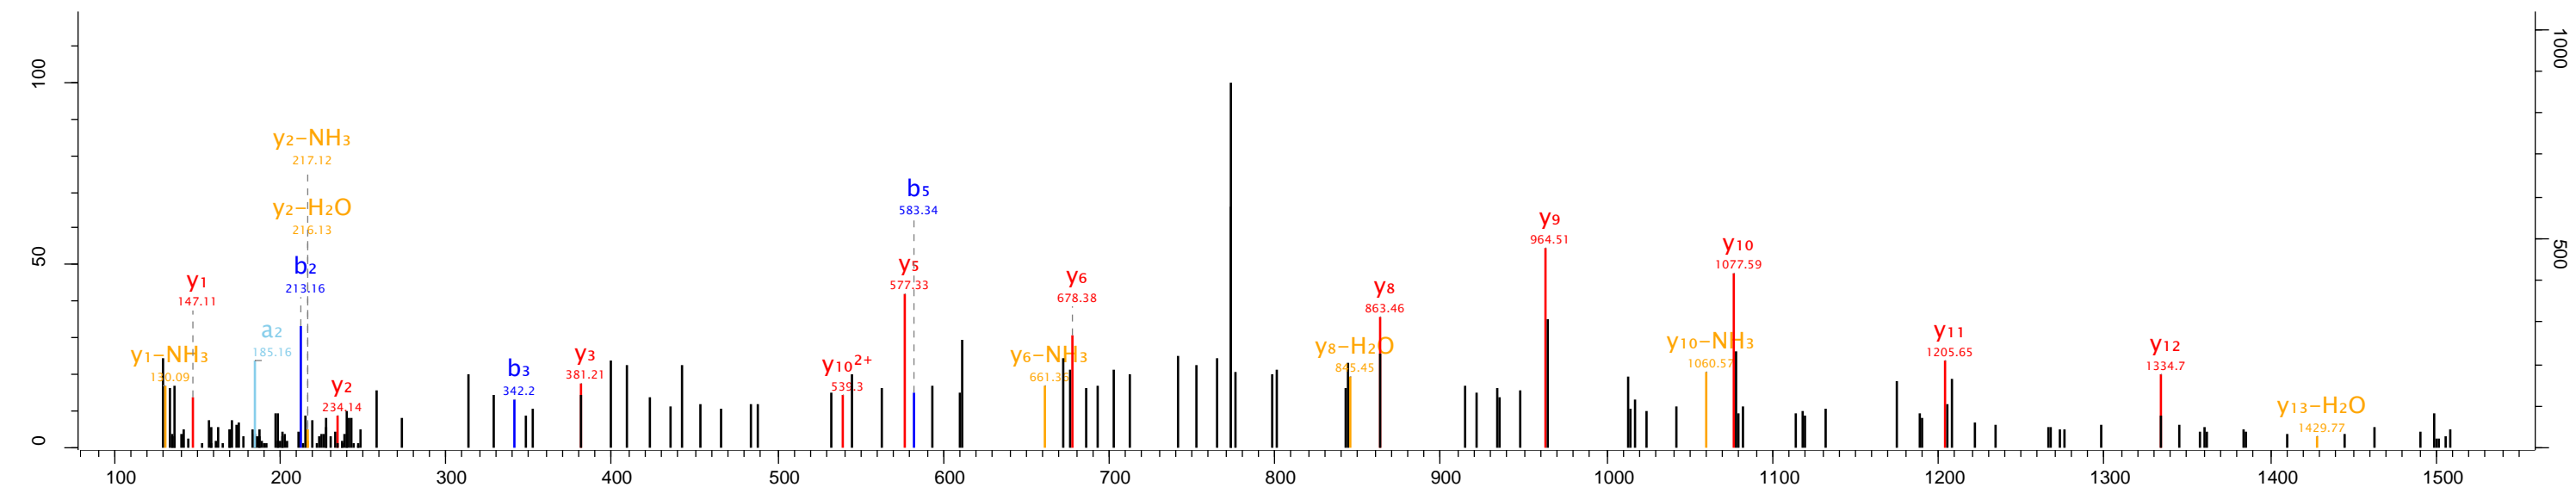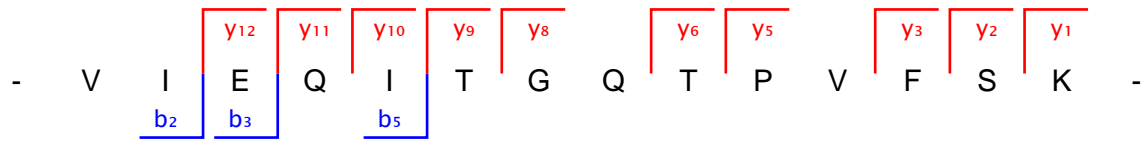

Spectral Annotation for Single-Peptide IDs between Single D11 Cells using Q-OT-LIT

Raw file: 2015-01-08\_CL04\_Blastomere-15  
 Scan: 43172 Method: ITMS; HCD Score: 28.41 m/z: 1014.15

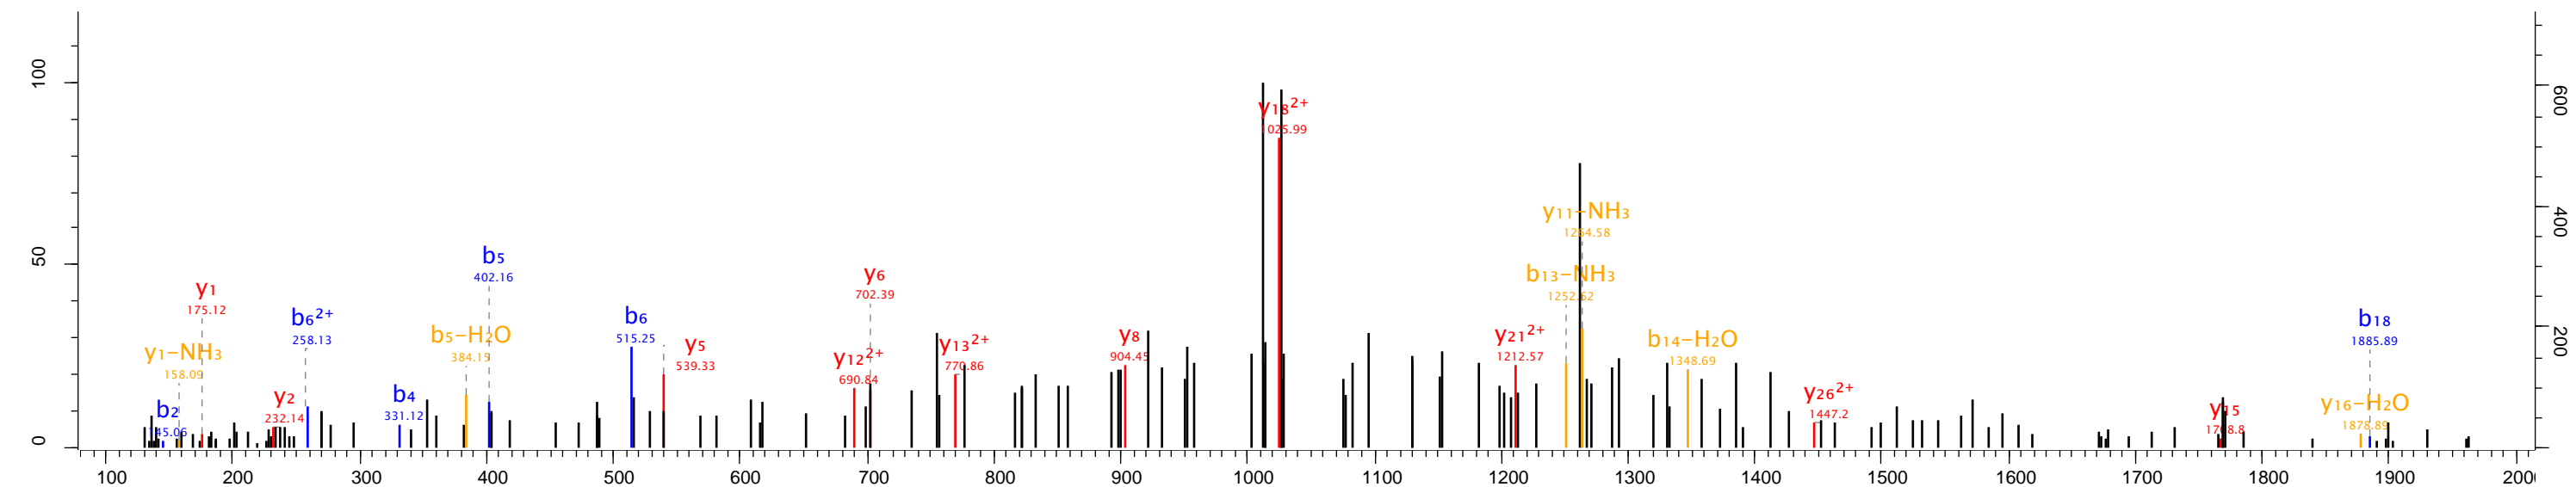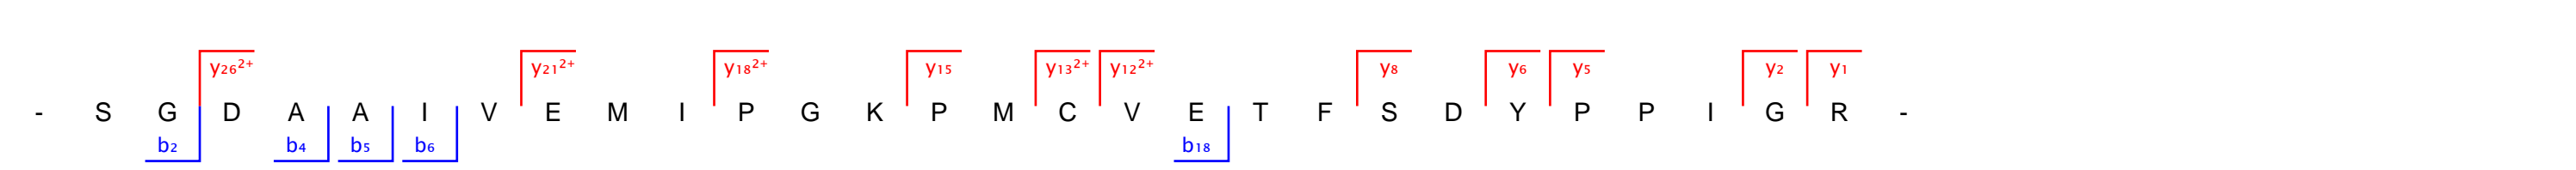

Raw file 2015-01-08\_CL04\_Blastomere-15 Scan 43431 Method ITMS; HCD Score 40.77 m/z 792.34

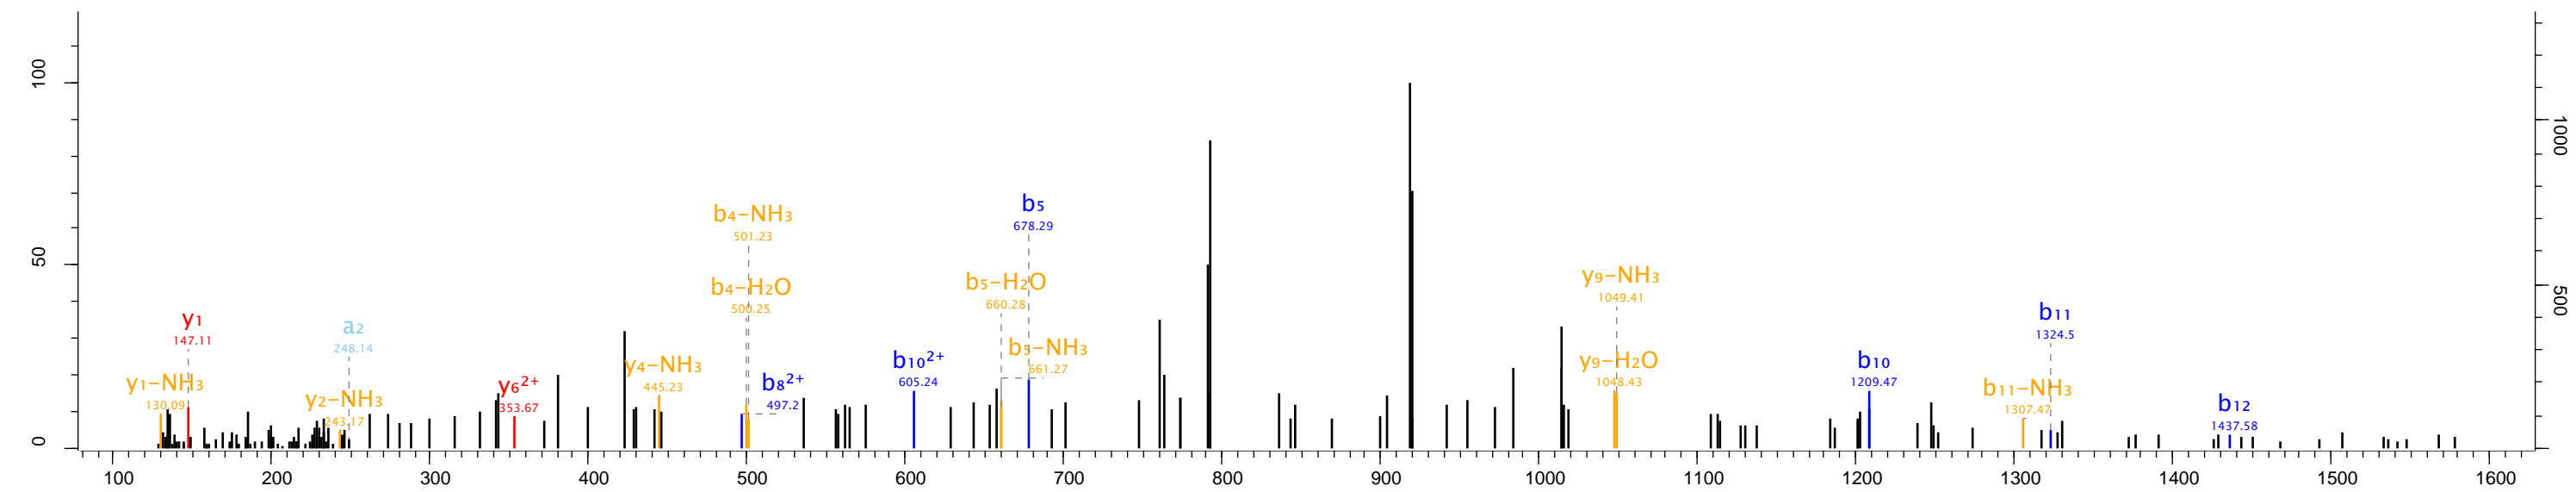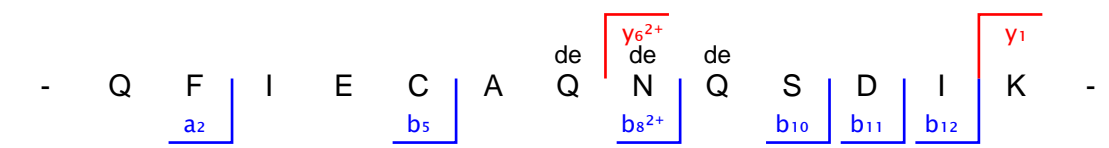

Spectral Annotation for Single-Peptide IDs between Single D11 Cells using Q-OT-LIT

Raw file 2015-01-08\_CL04\_Blastomere-15 Scan 43486 Method ITMS; HCD Score 85.76 m/z 976.84

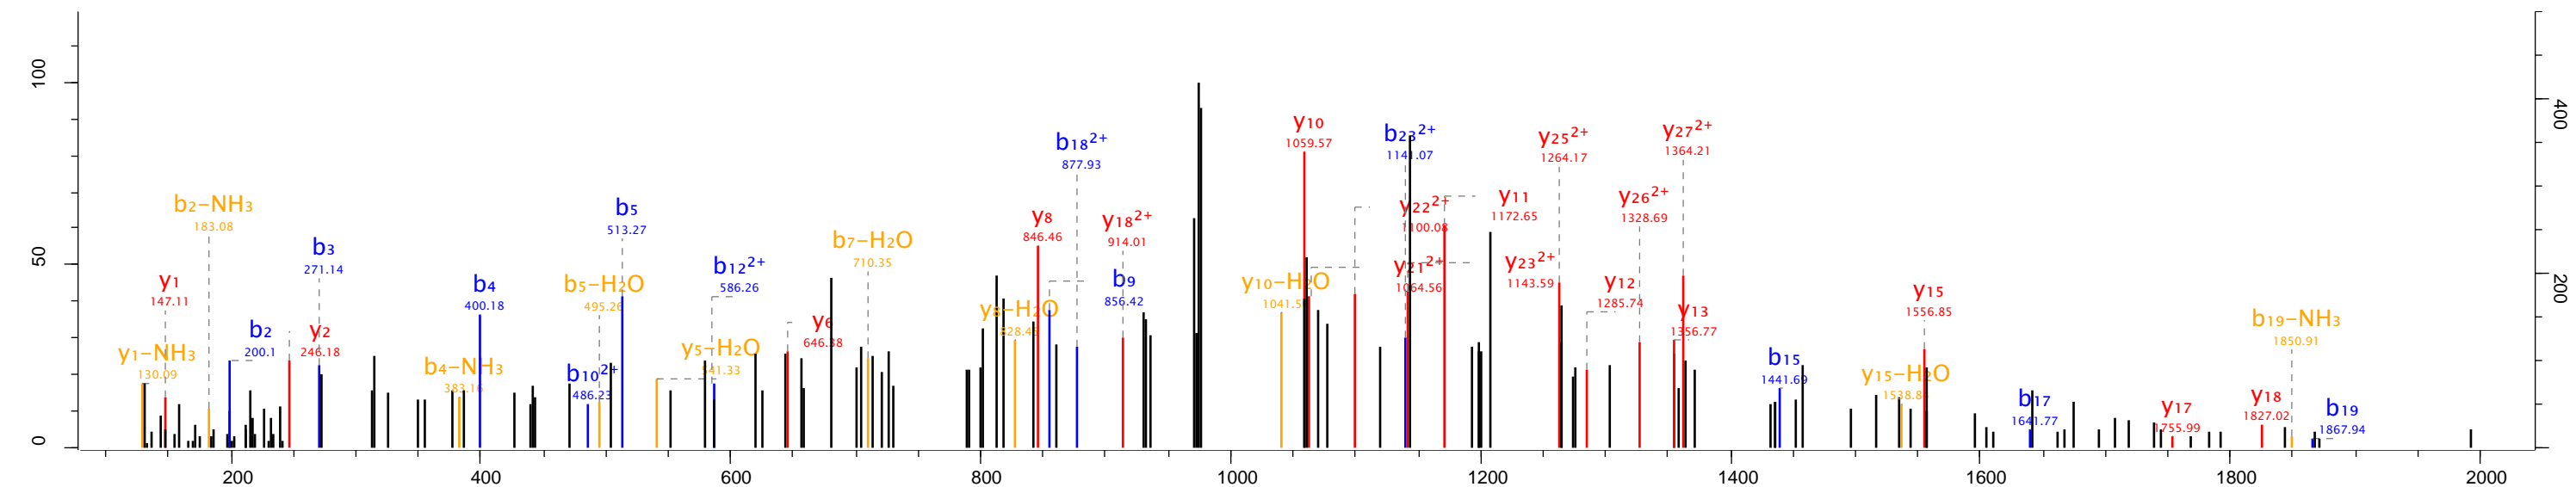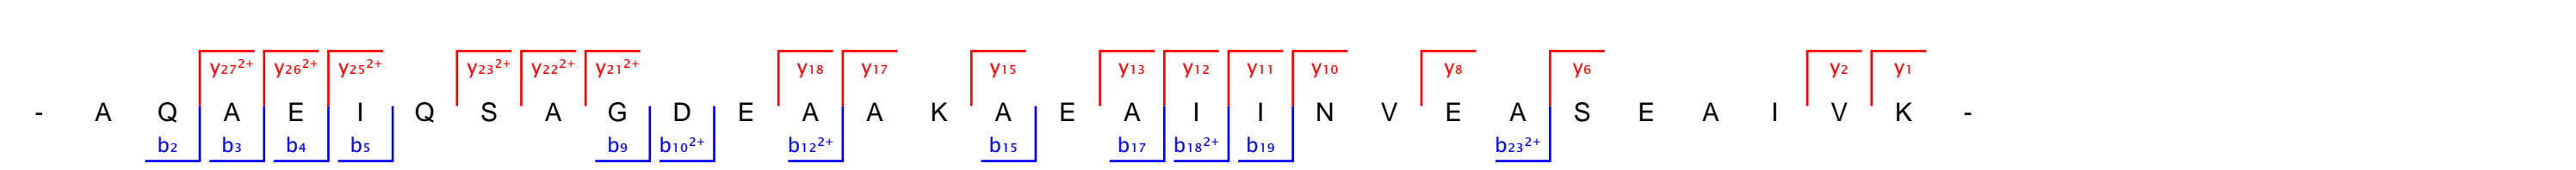

Spectral Annotation for Single-Peptide IDs between Single D11 Cells using Q-OT-LIT

Raw file 2015-01-08\_CL04\_Blastomere-15 Scan 43541 Method ITMS; HCD Score 67.39 m/z 976.16

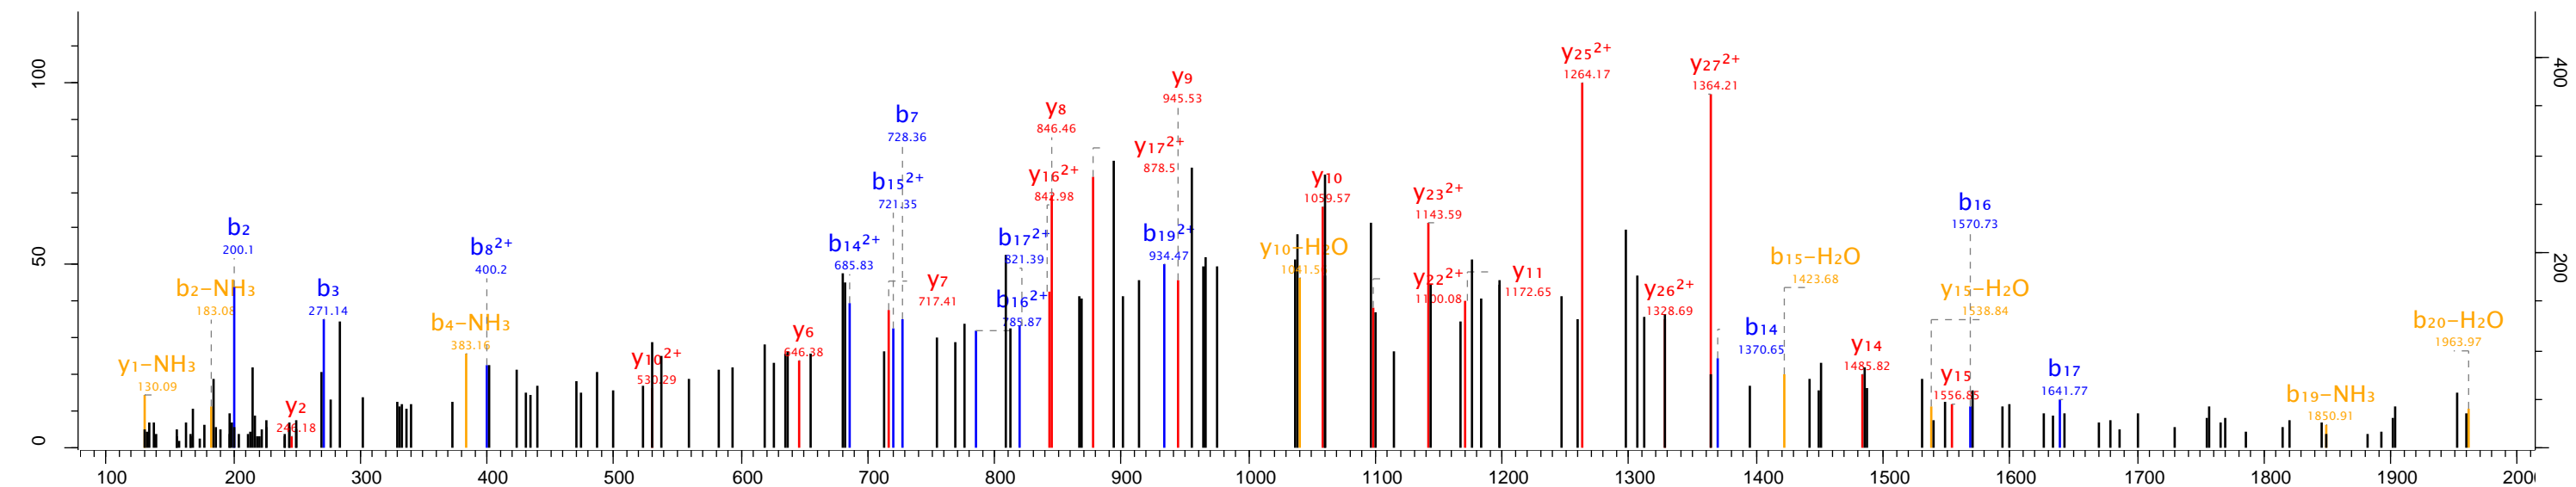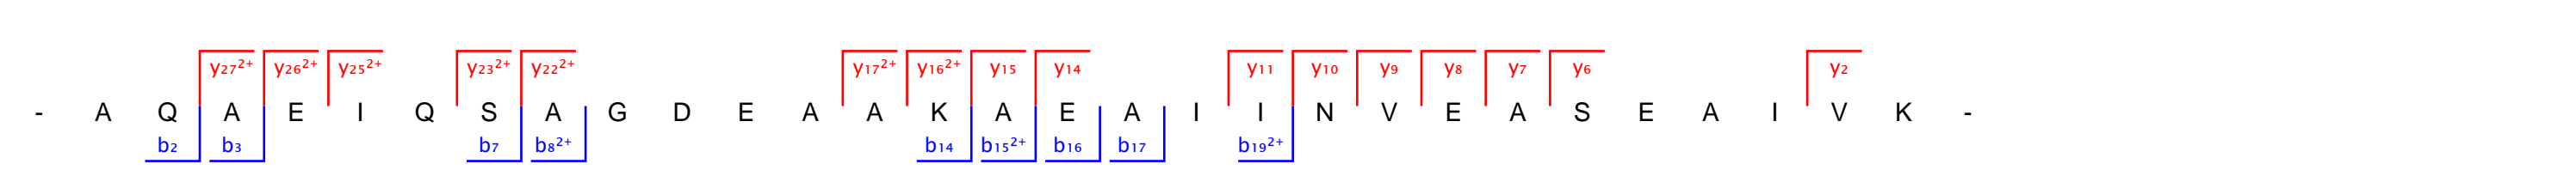

Spectral Annotation for Single-Peptide IDs between Single D11 Cells using Q-OT-LIT

Raw file  
 2015-01-08\_CL04\_Blastomere-15  
 Scan 43560 Method ITMS; HCD Score 37.41 m/z 1013.49

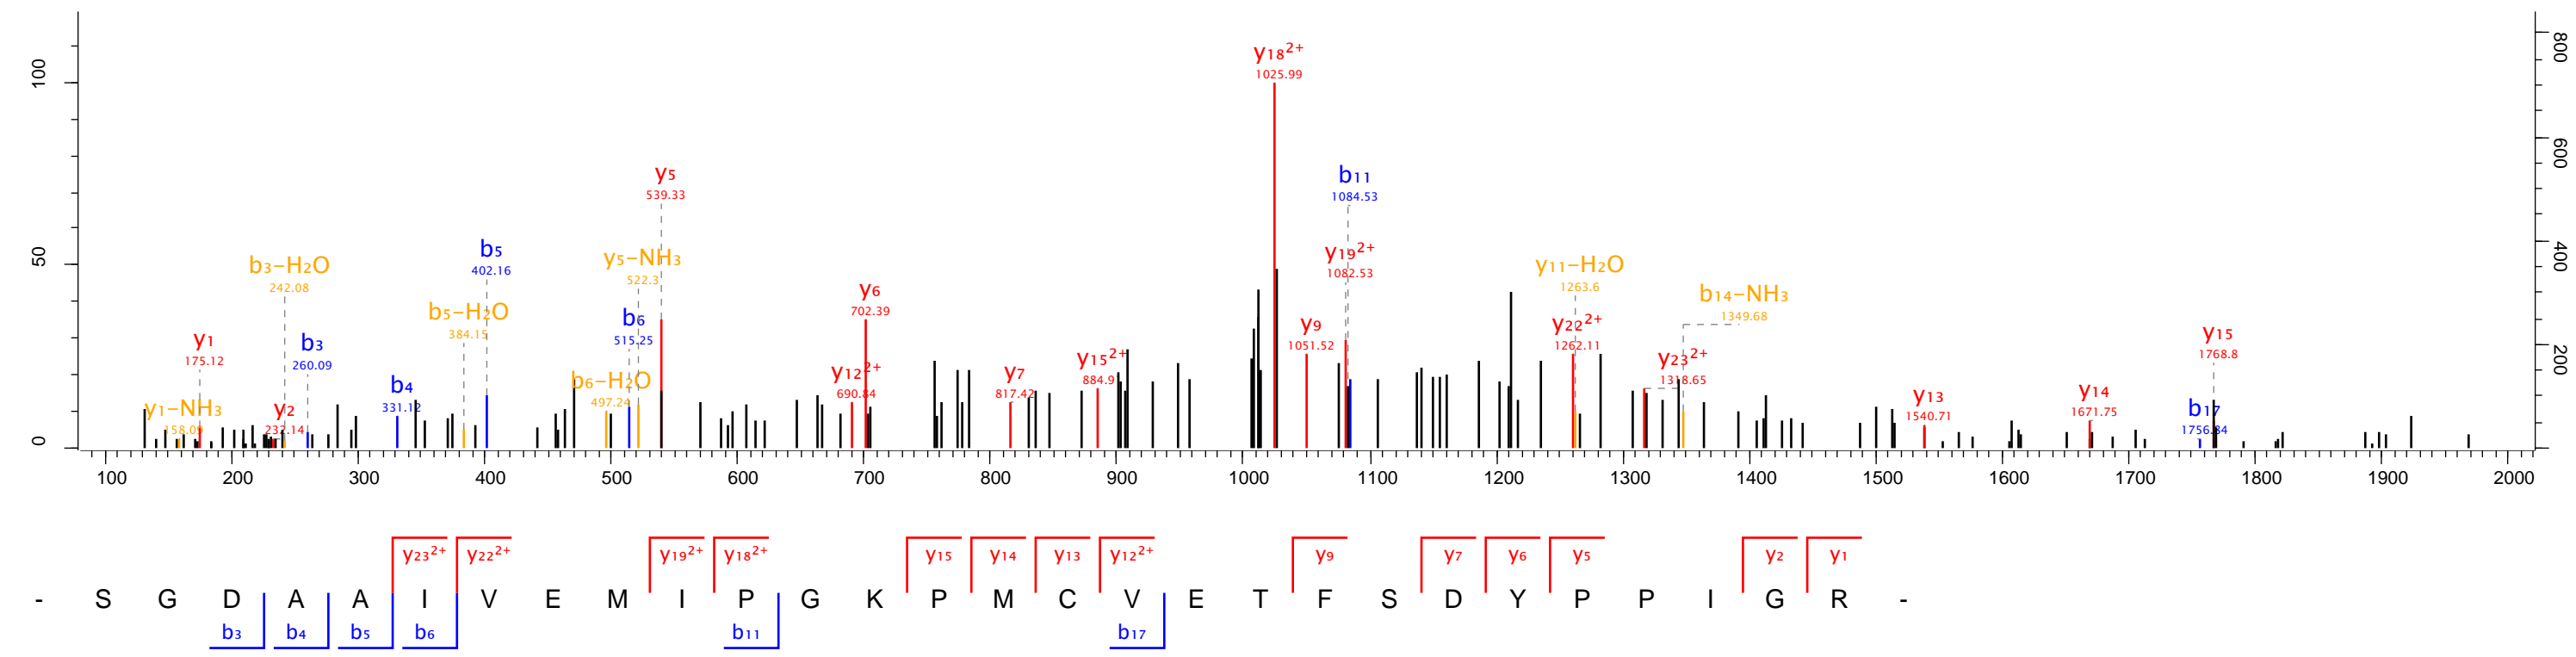

Spectral Annotation for Single-Peptide IDs between Single D11 Cells using Q-OT-LIT

Raw file 2015-01-08\_CL04\_Blastomere-15 Scan 43654 Method ITMS; HCD Score 59.55 m/z 976.5

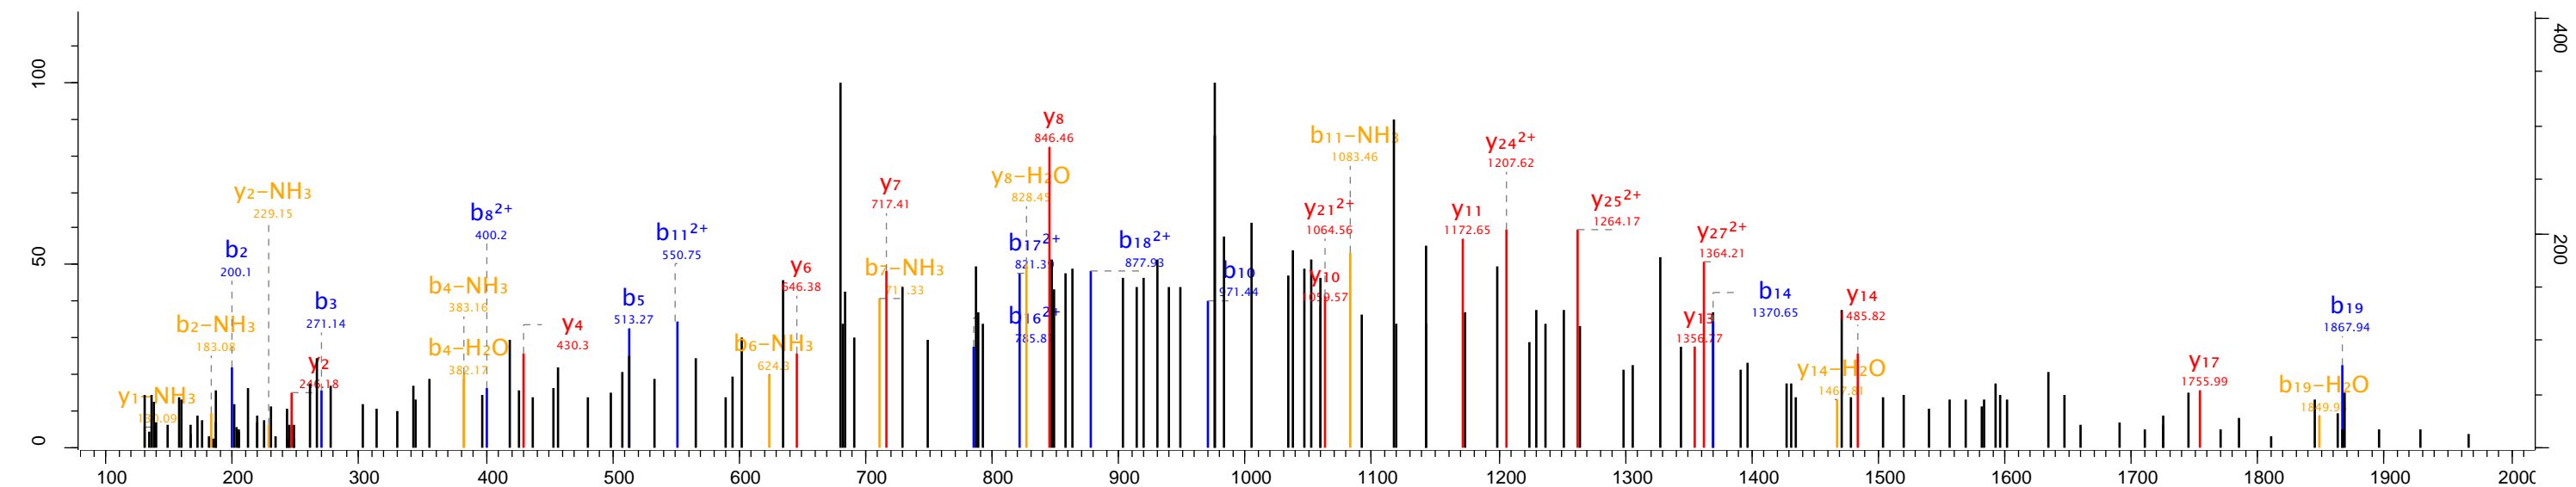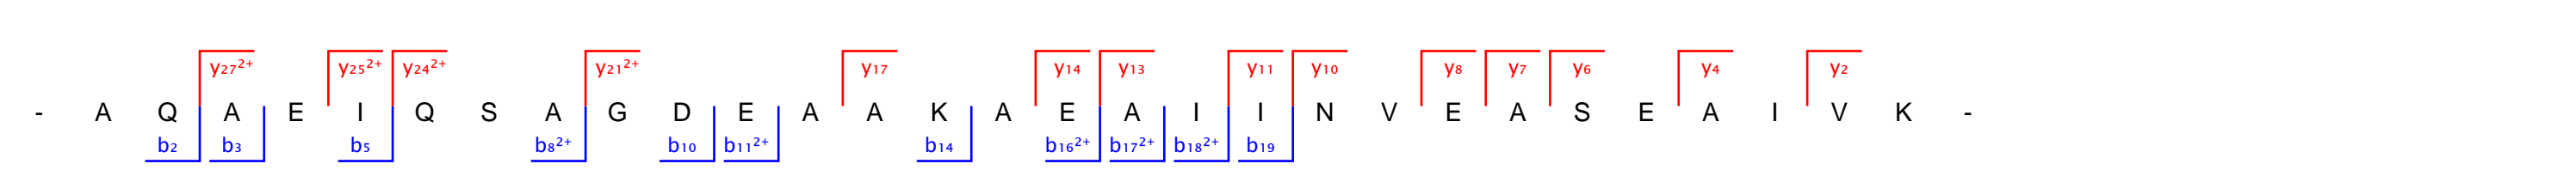

Spectral Annotation for Single-Peptide IDs between Single D11 Cells using Q-OT-LIT



Raw file: 2015-01-08\_CL04\_Blastomere-15  
 Scan: 43717 Method: ITMS; HCD Score: 73.65 m/z: 1013.81

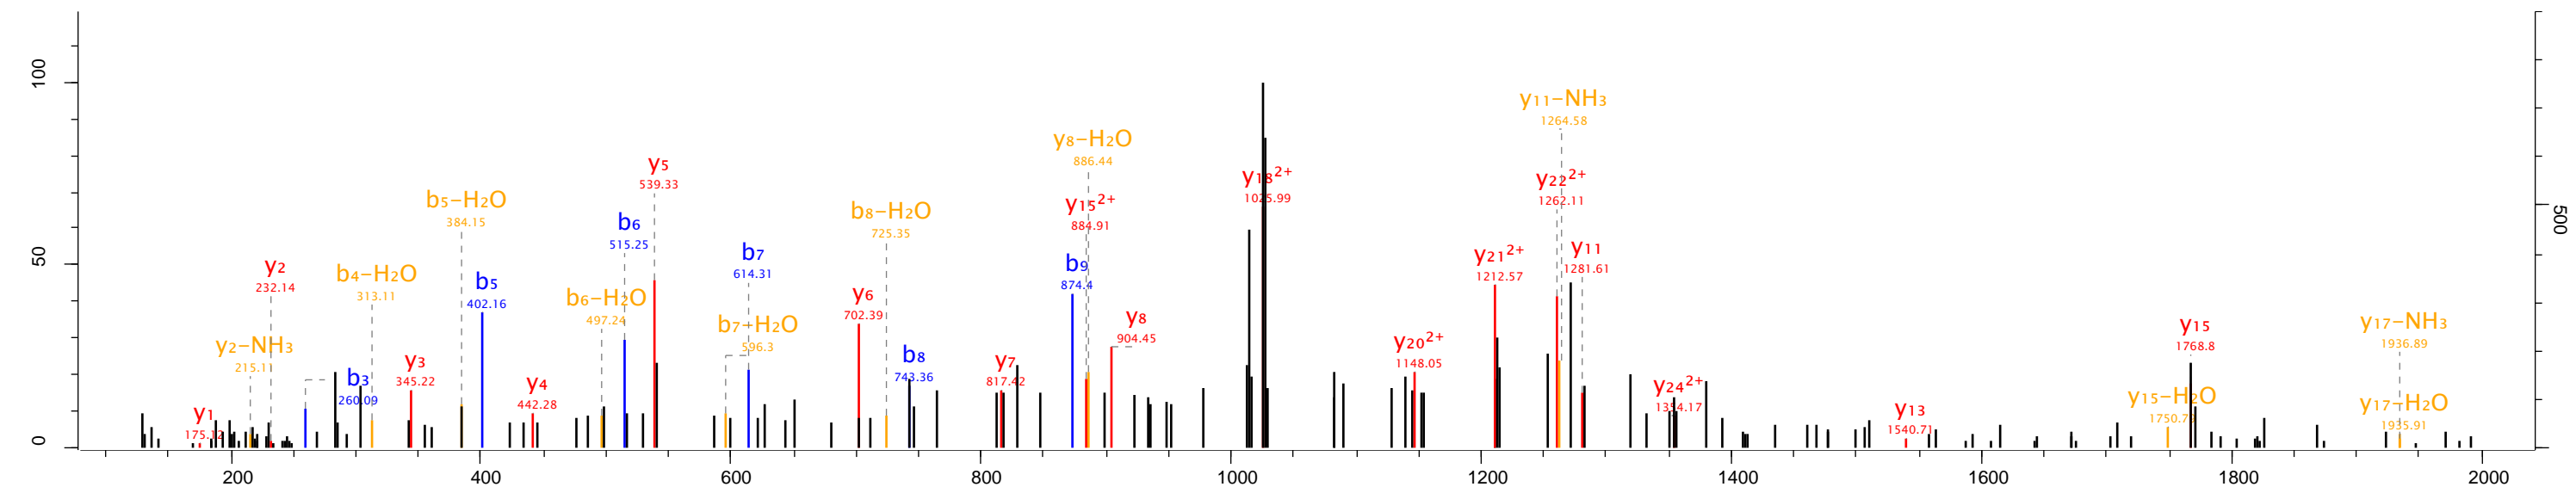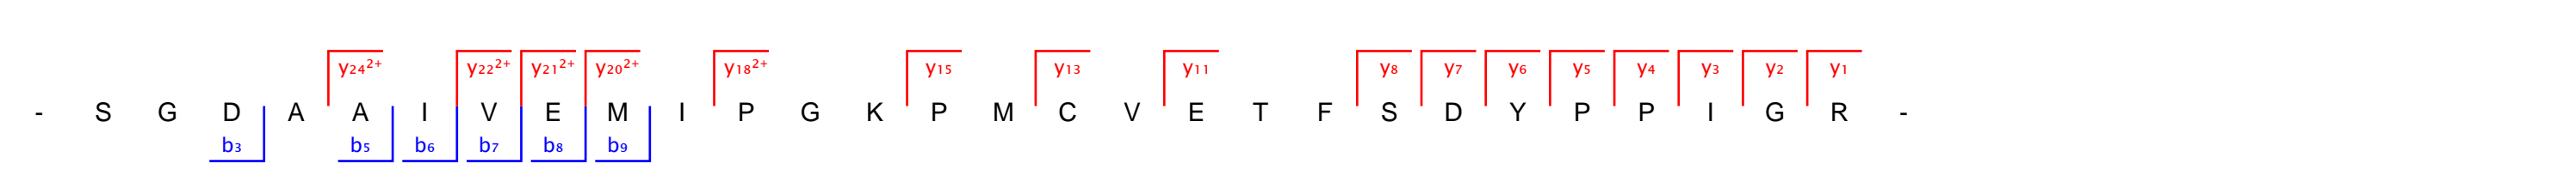

Spectral Annotation for Single-Peptide IDs between Single D11 Cells using Q-OT-LIT

Raw file  
 2015-01-08\_CL04\_Blastomere-15  
 Scan 43738 Method ITMS; HCD Score 82.92 m/z 773.92

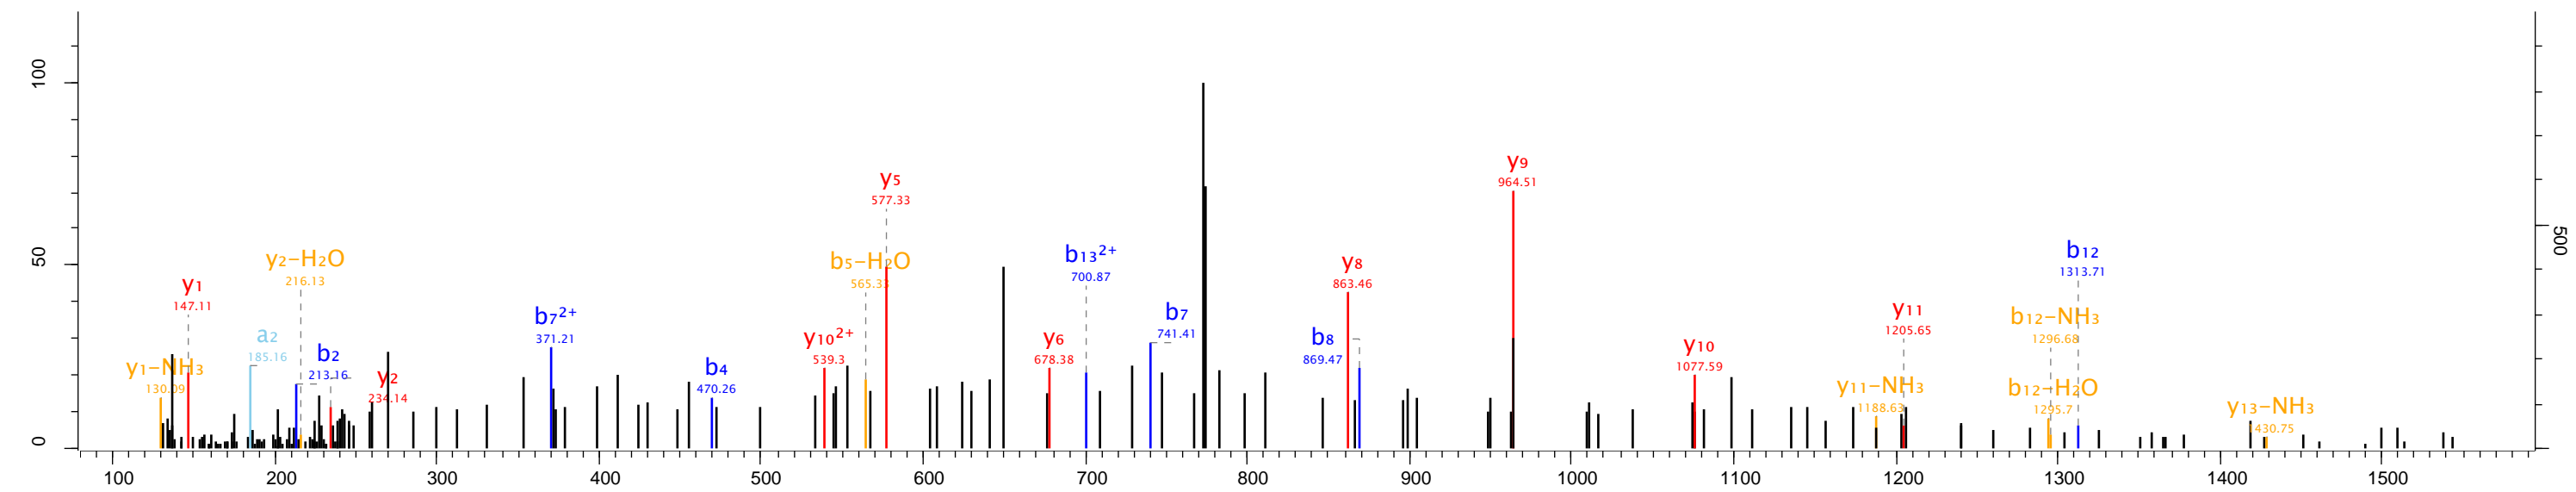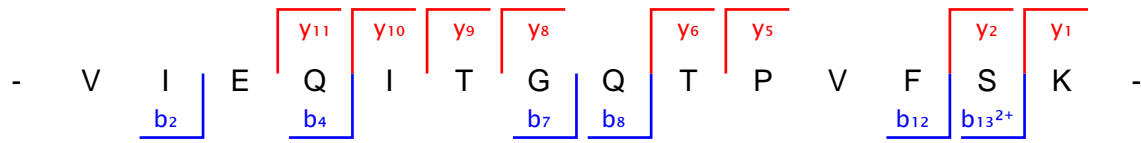

Spectral Annotation for Single-Peptide IDs between Single D11 Cells using Q-OT-LIT

Raw file 2015-01-08\_CL04\_Blastomere-15 Scan 43746 Method ITMS; HCD Score 116.58 m/z 824.91

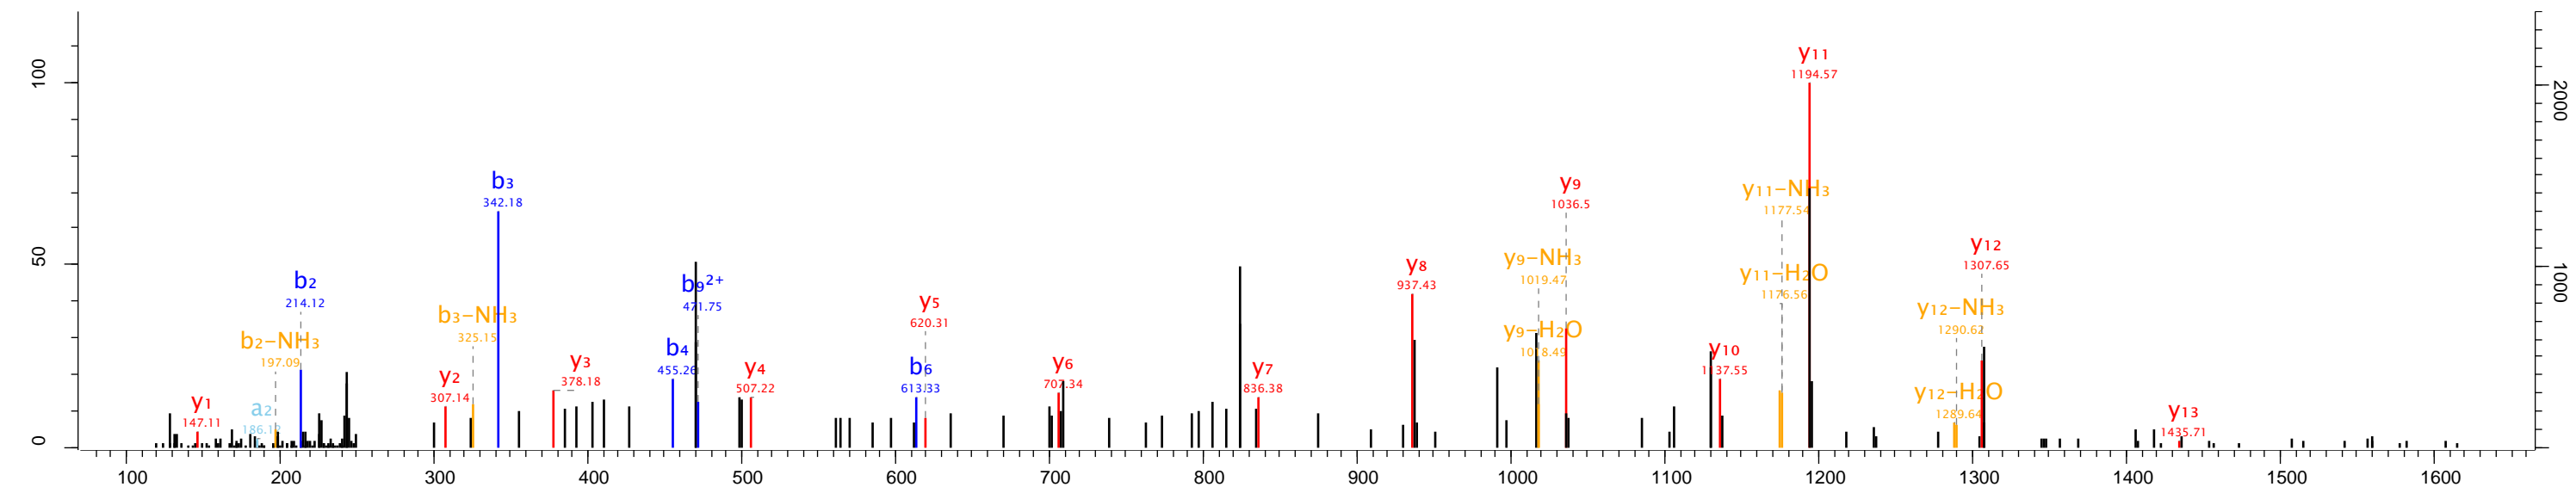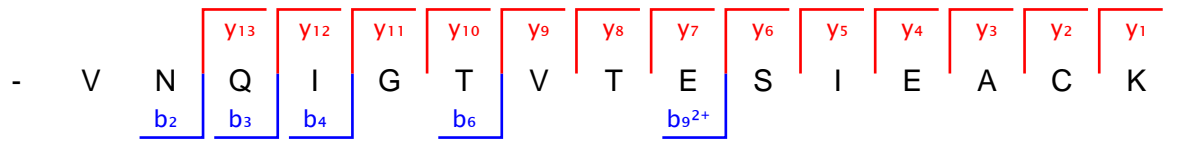

Spectral Annotation for Single-Peptide IDs between Single D11 Cells using Q-OT-LIT

Raw file: 2015-01-08\_CL04\_Blastomere-15  
 Scan: 43760 Method: ITMS; HCD Score: 67.01 m/z: 1013.48

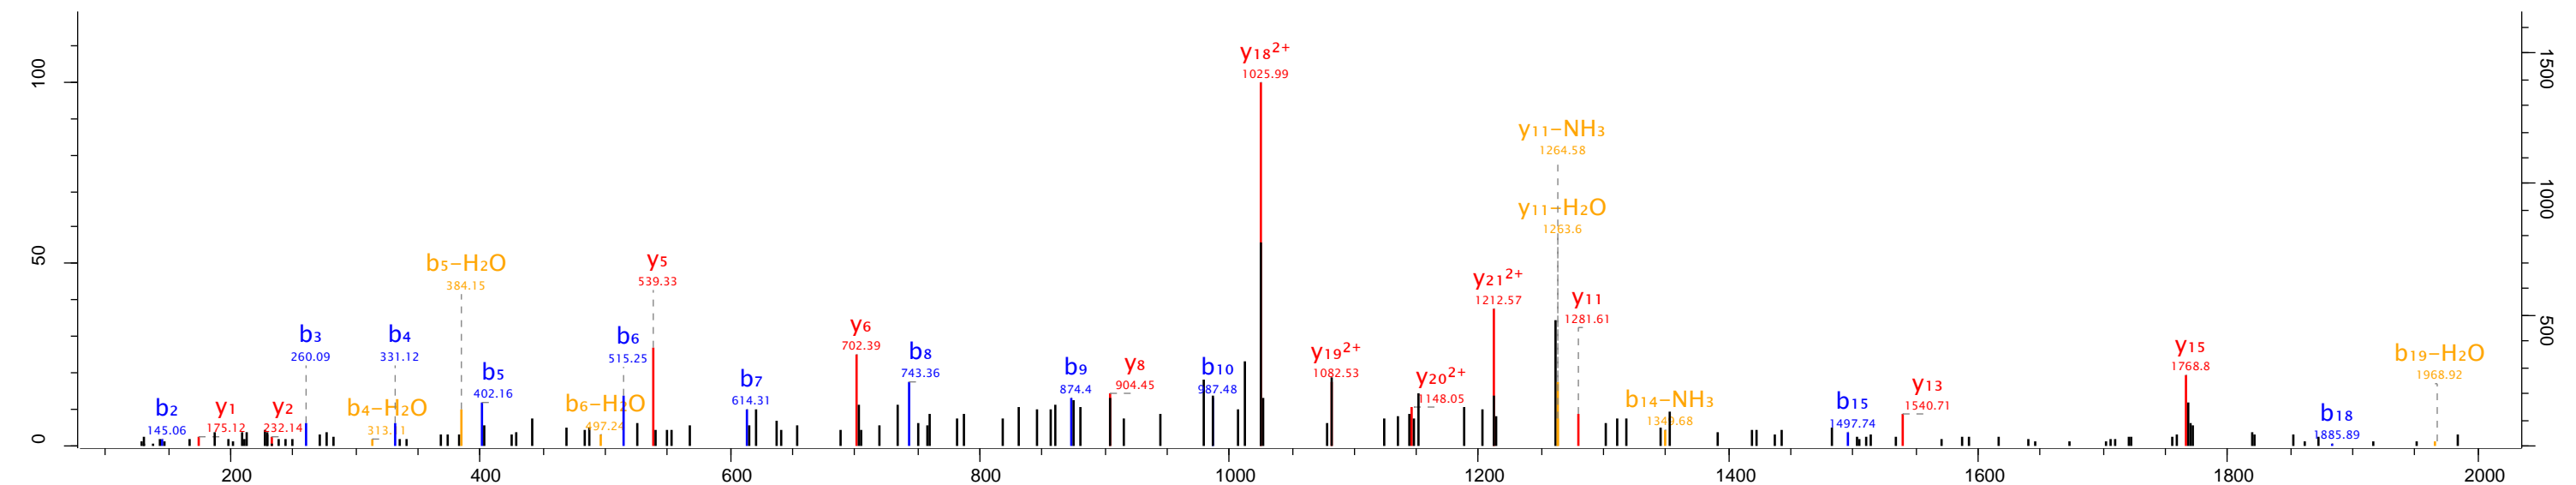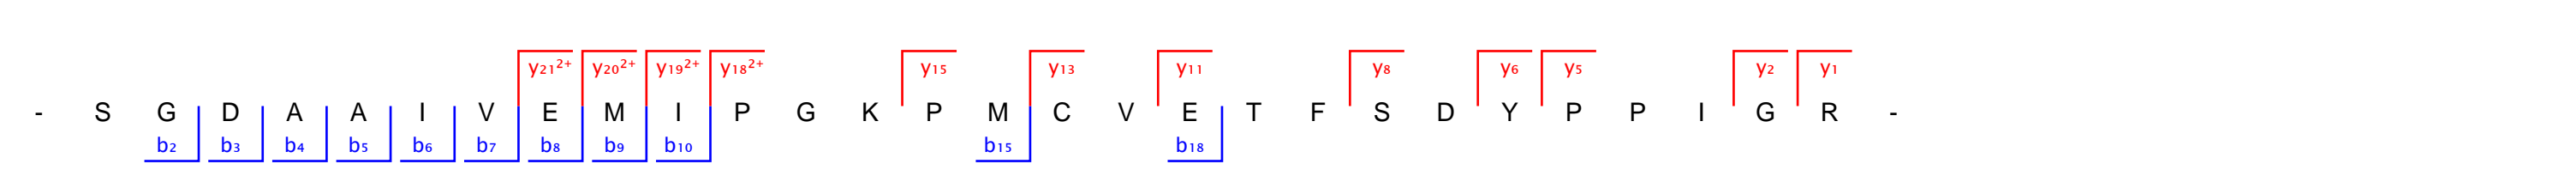

Raw file: 2015-01-08\_CL04\_Blastomere-15  
 Scan: 43776 Method: ITMS; HCD Score: 40.21 m/z: 1014.15

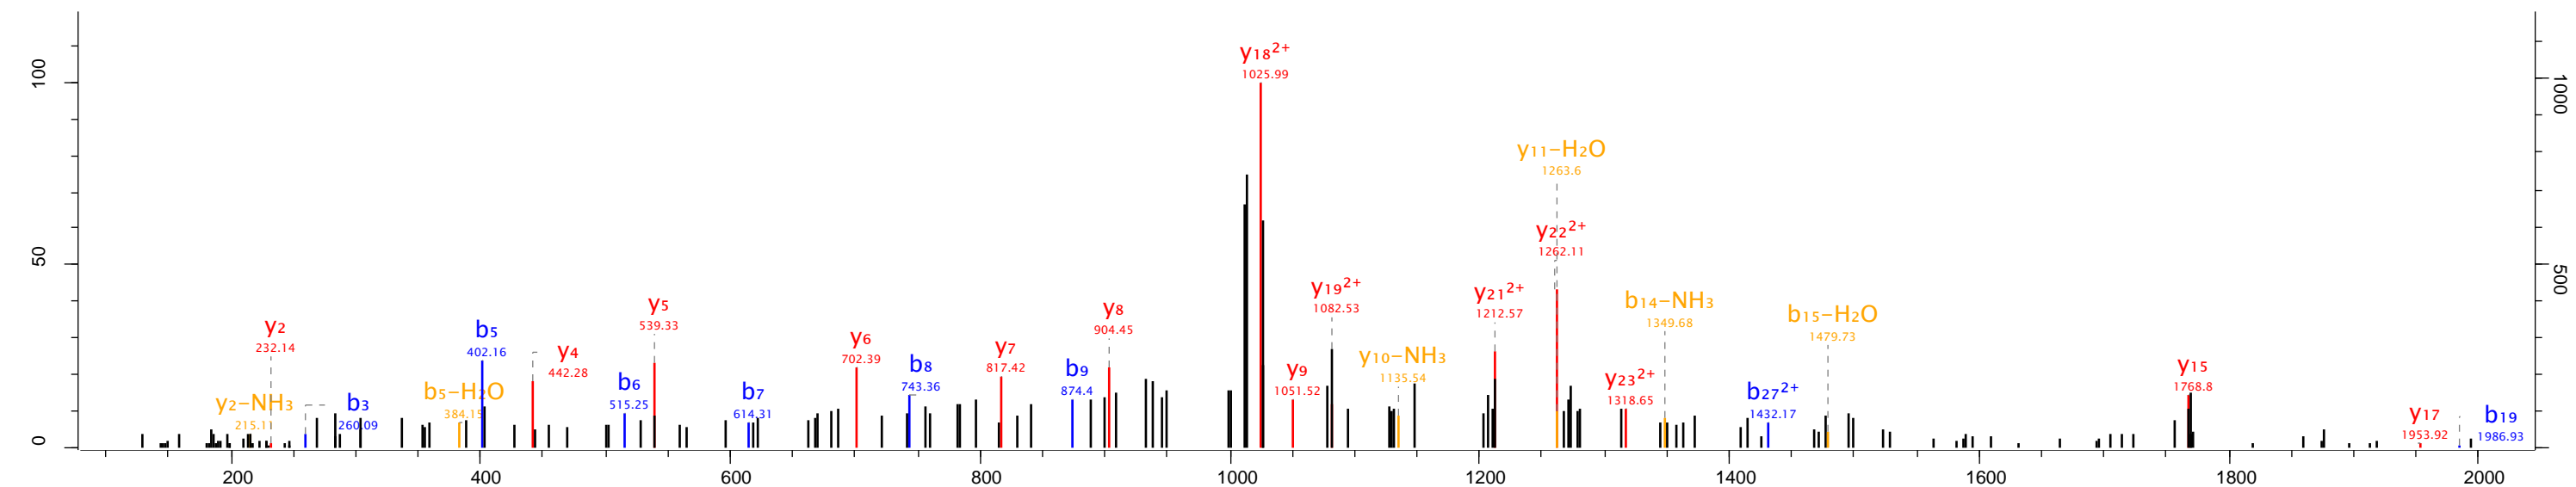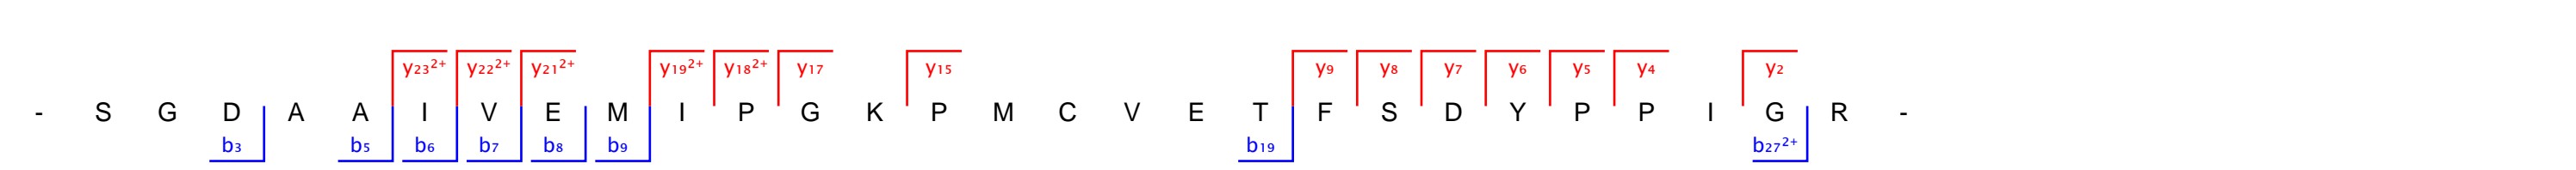

Spectral Annotation for Single-Peptide IDs between Single D11 Cells using Q-OT-LIT

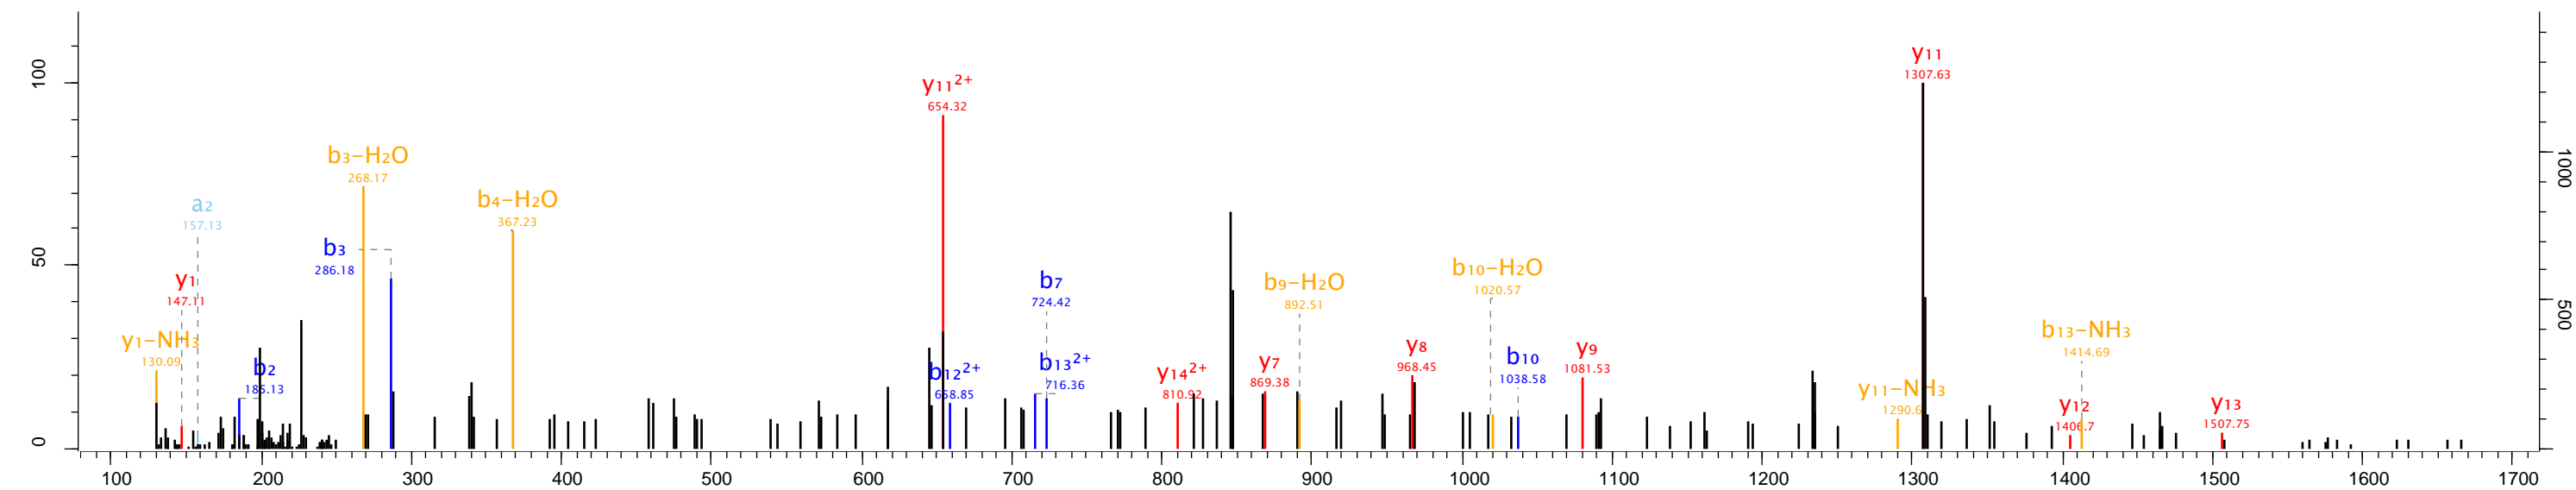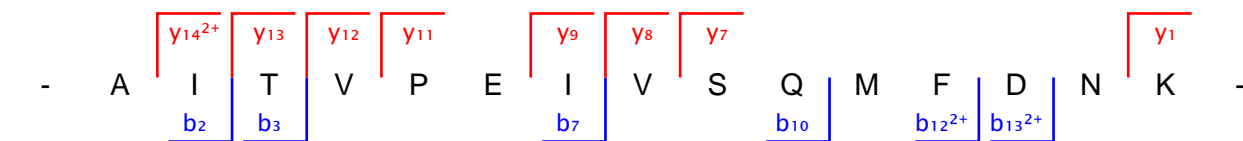

Raw file 2015-01-08\_CL04\_Blastomere-15 Scan 43851 Method ITMS; HCD Score 68.58 m/z 597.63

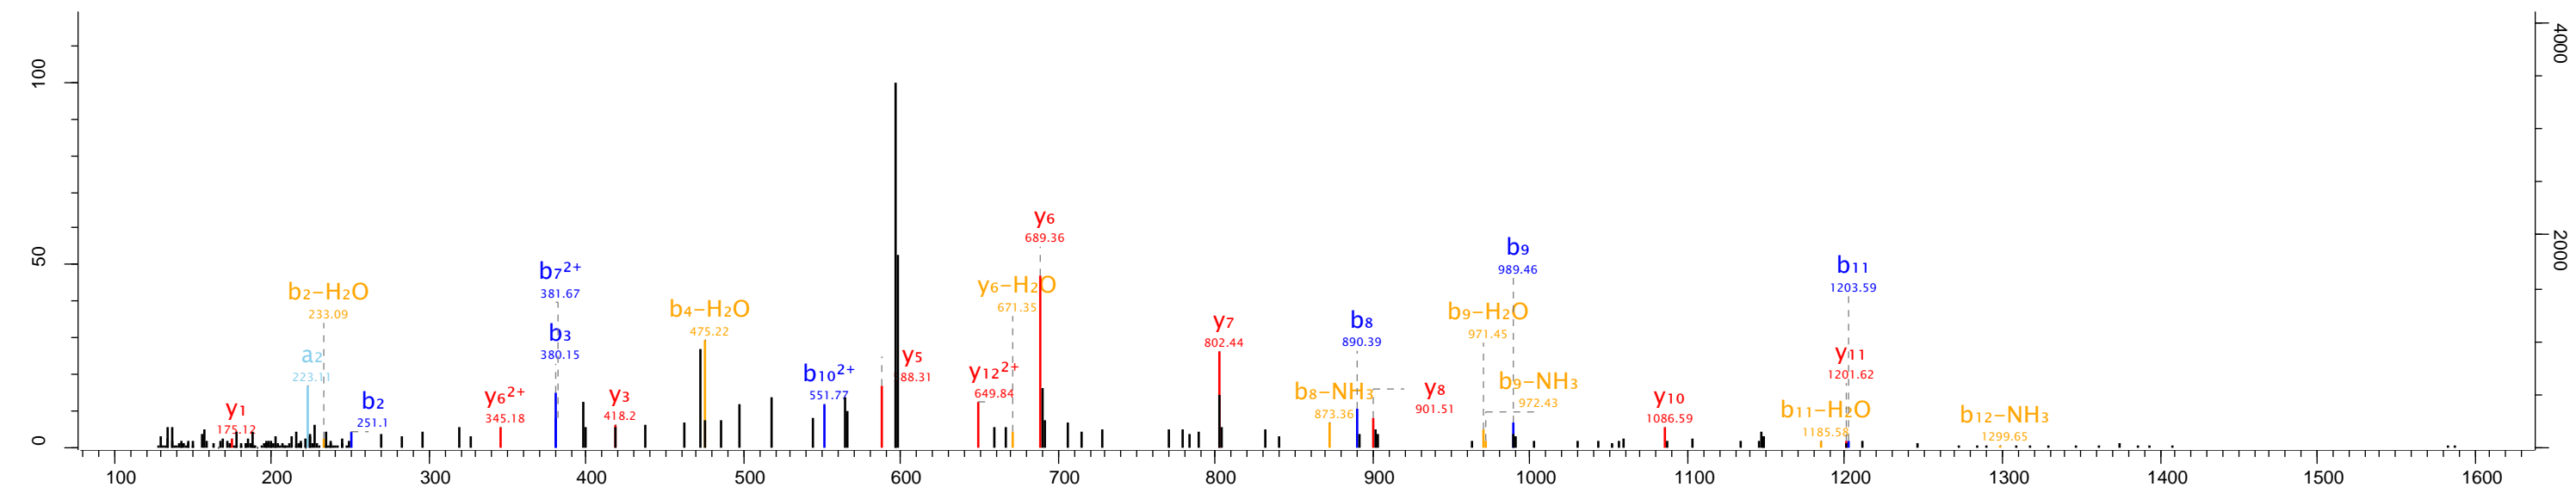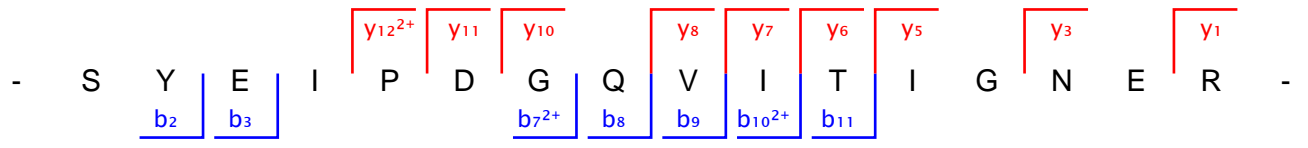

Spectral Annotation for Single-Peptide IDs between Single D11 Cells using Q-OT-LIT

Raw file 2015-01-08\_CL04\_Blastomere-15 Scan 43869 Method ITMS; HCD Score 81.35 m/z 597.63

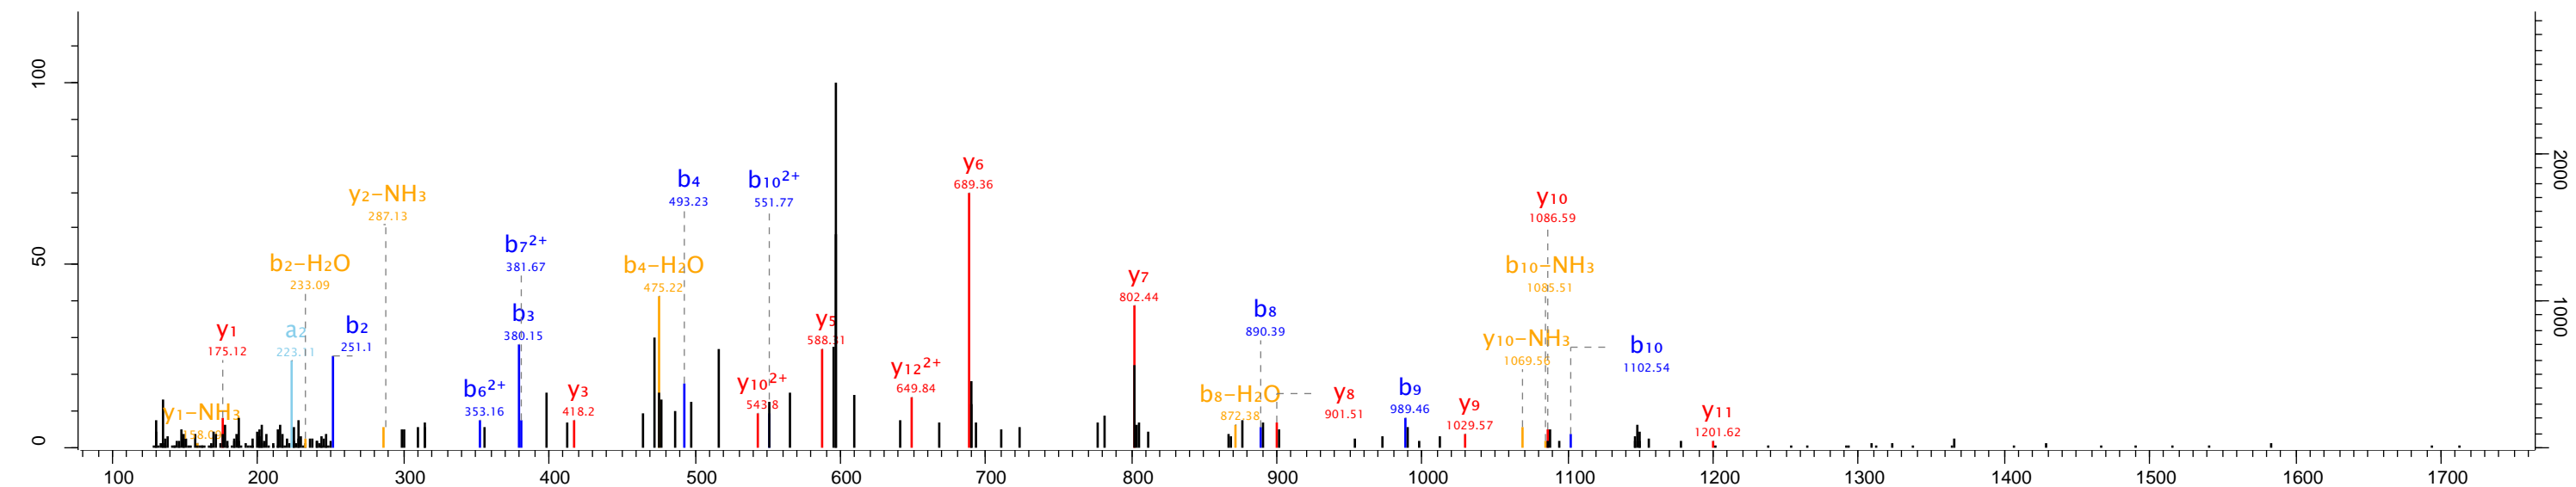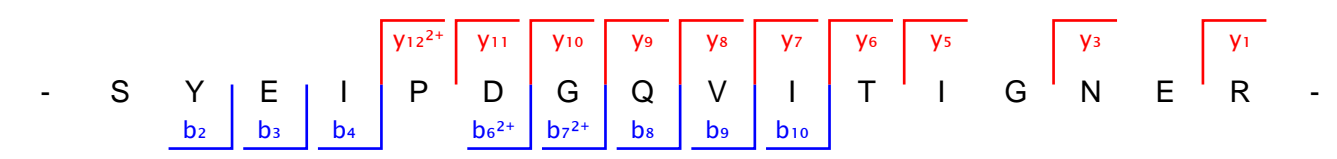

Spectral Annotation for Single-Peptide IDs between Single D11 Cells using Q-OT-LIT



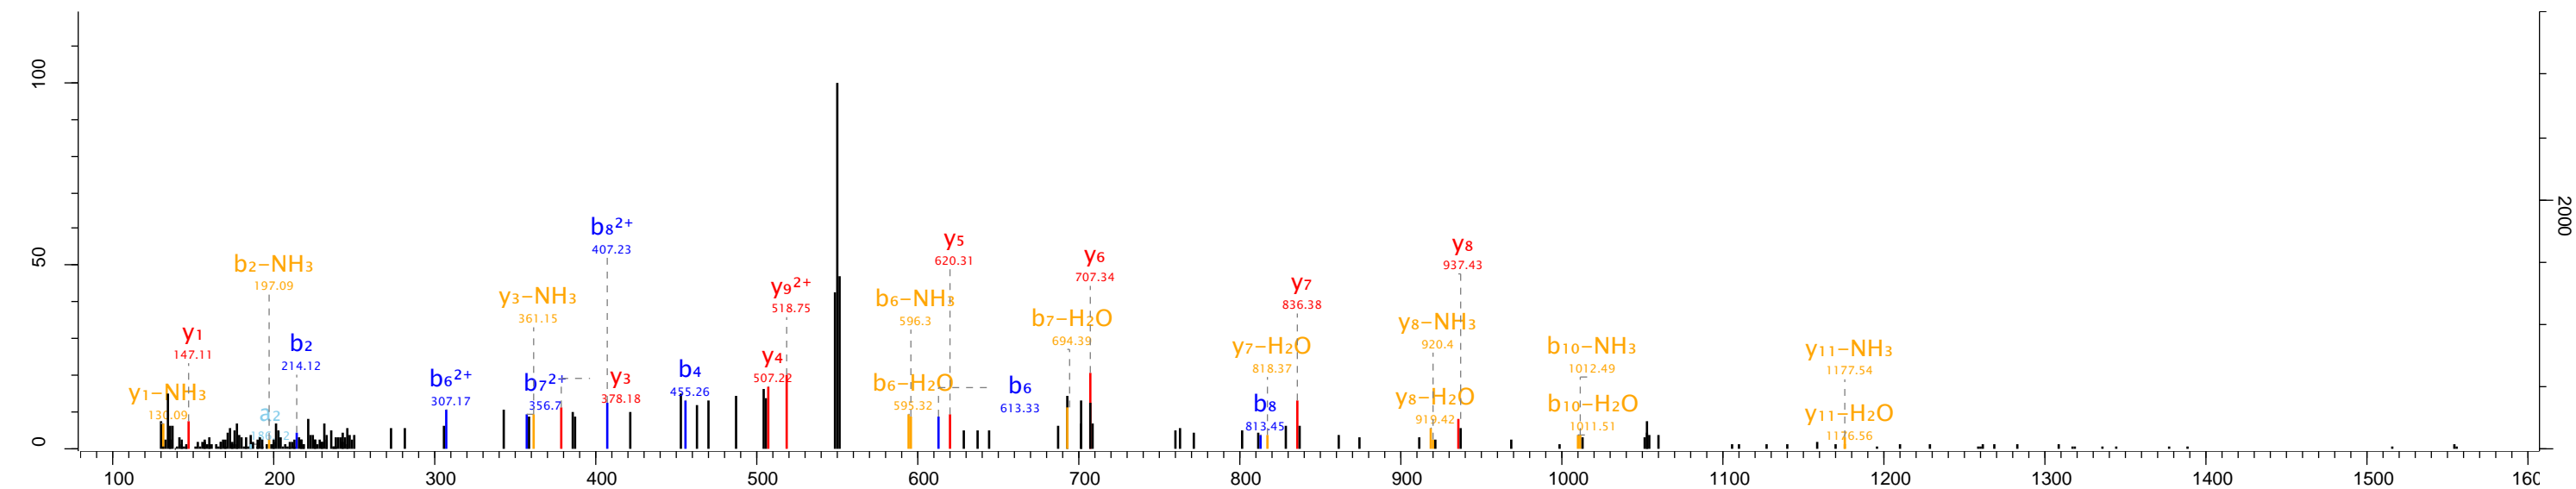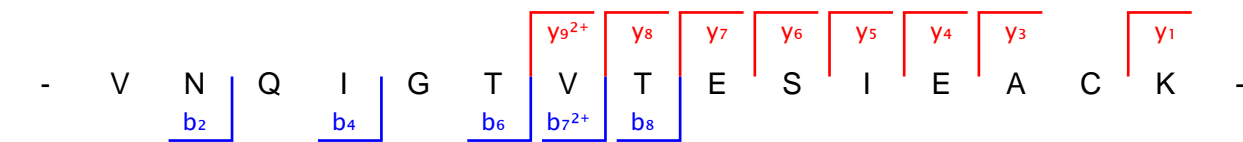

Raw file 2015-01-08\_CL04\_Blastomere-15 Scan 44065 Method ITMS; HCD Score 137.32 m/z 895.94

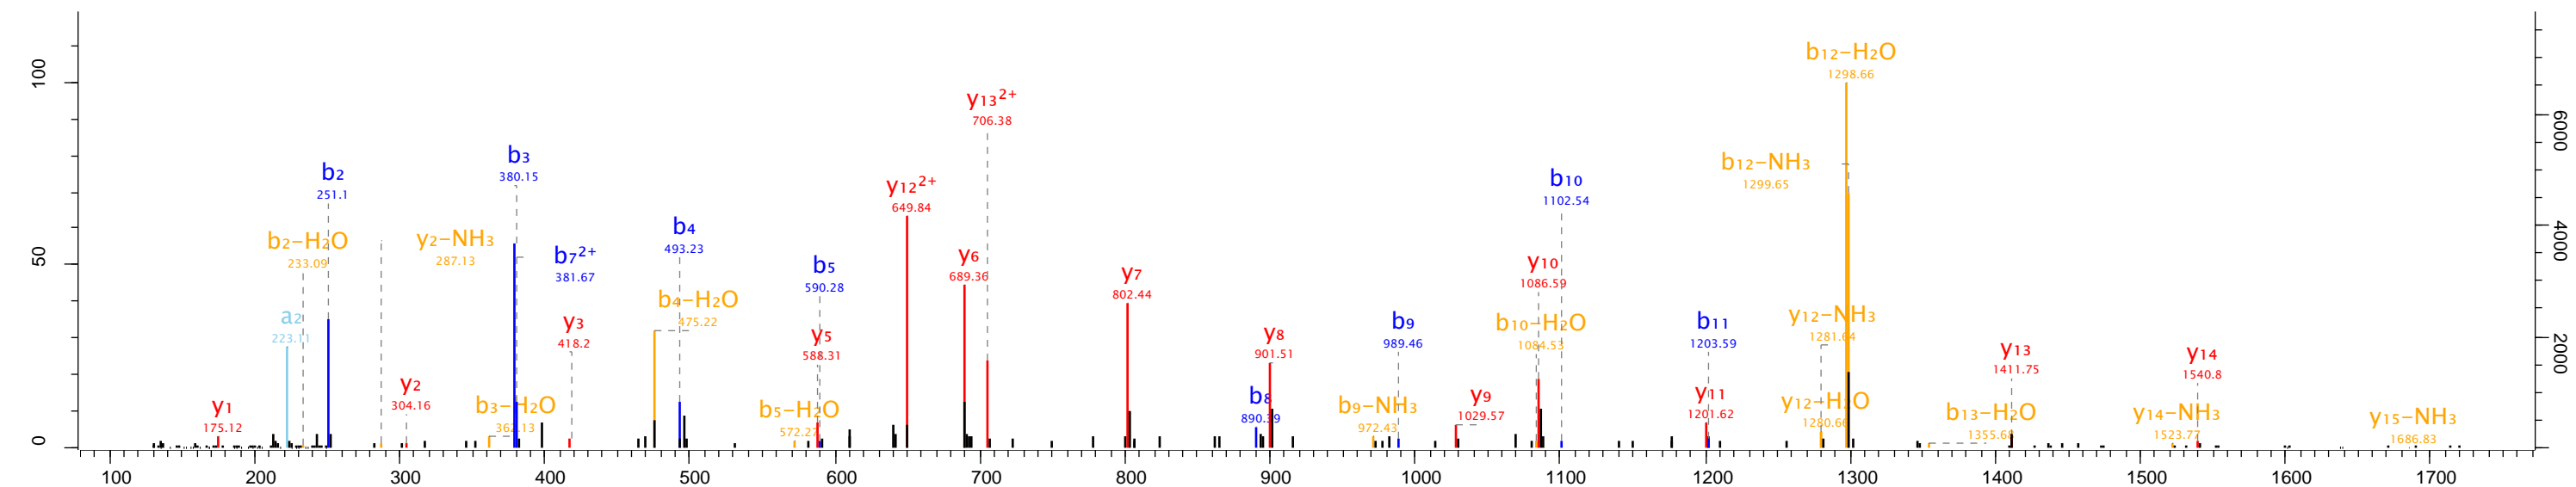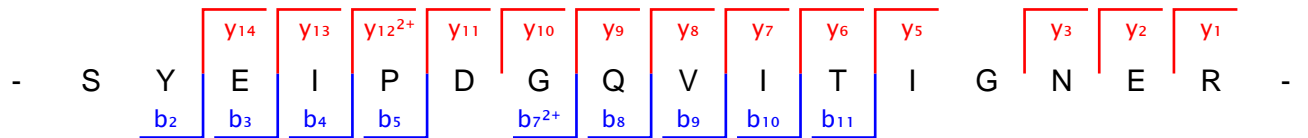

Spectral Annotation for Single-Peptide IDs between Single D11 Cells using Q-OT-LIT

Raw file 2015-01-08\_CL04\_Blastomere-15 Scan 44128 Method ITMS; HCD Score 62.19 m/z 1013.82

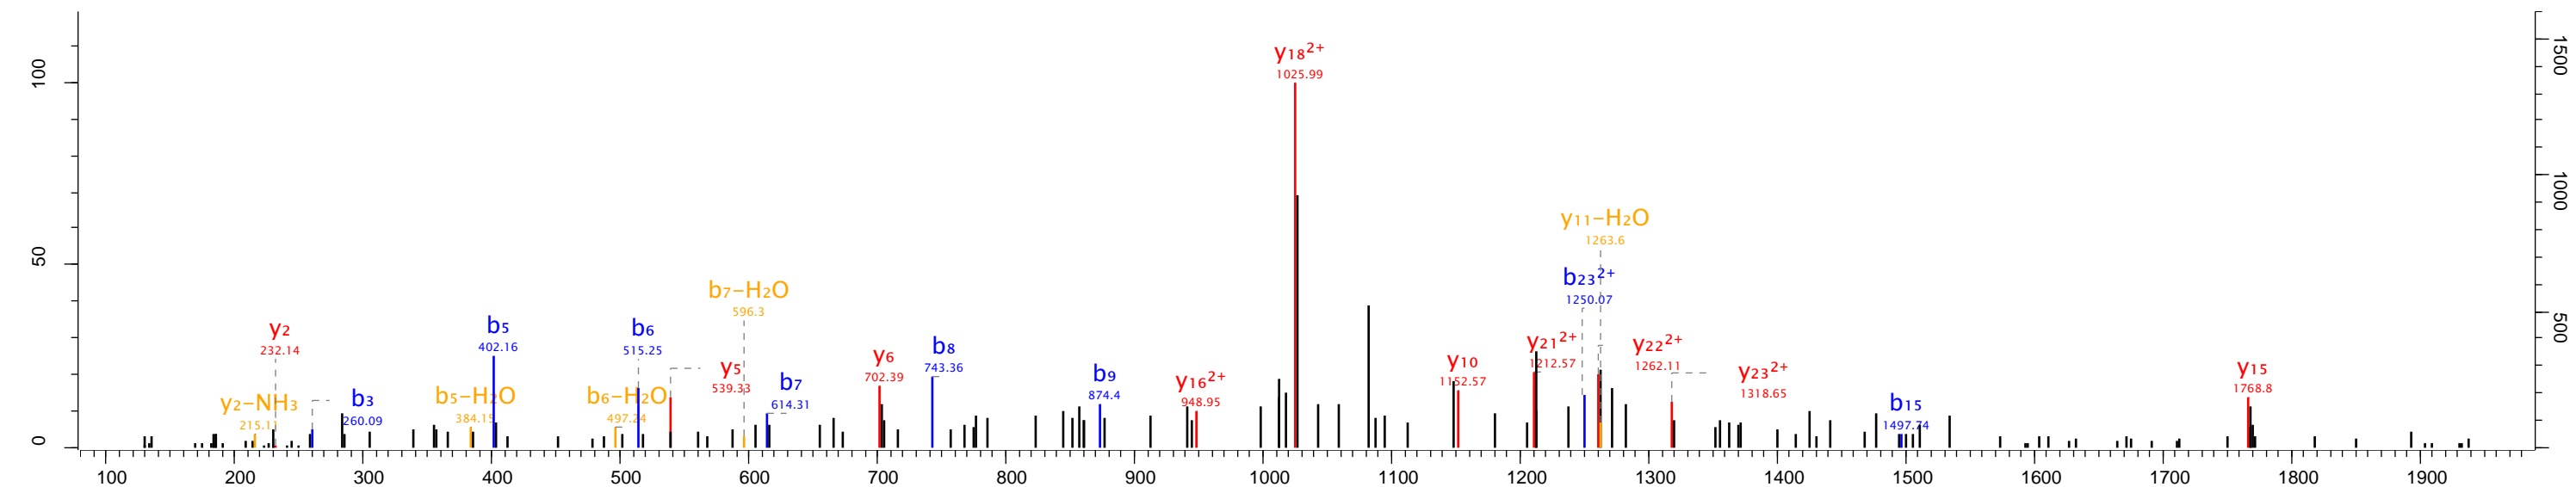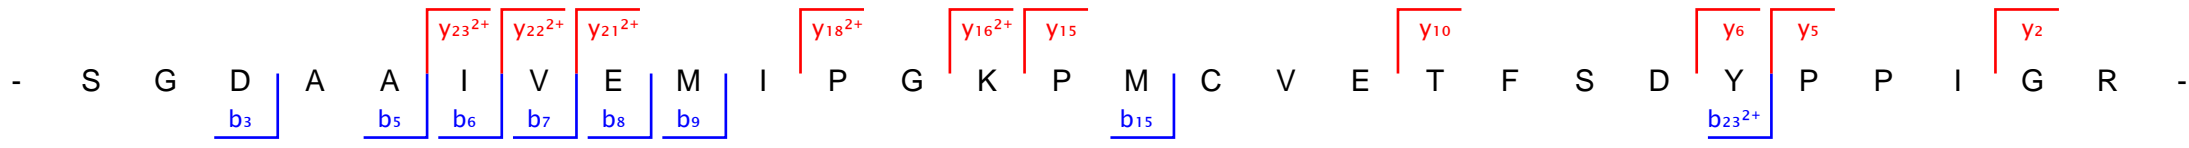

Spectral Annotation for Single-Peptide IDs between Single D11 Cells using Q-OT-LIT

Raw file 2015-01-08\_CL04\_Blastomere-15 Scan 44142 Method ITMS; HCD Score 55.99 m/z 1013.82

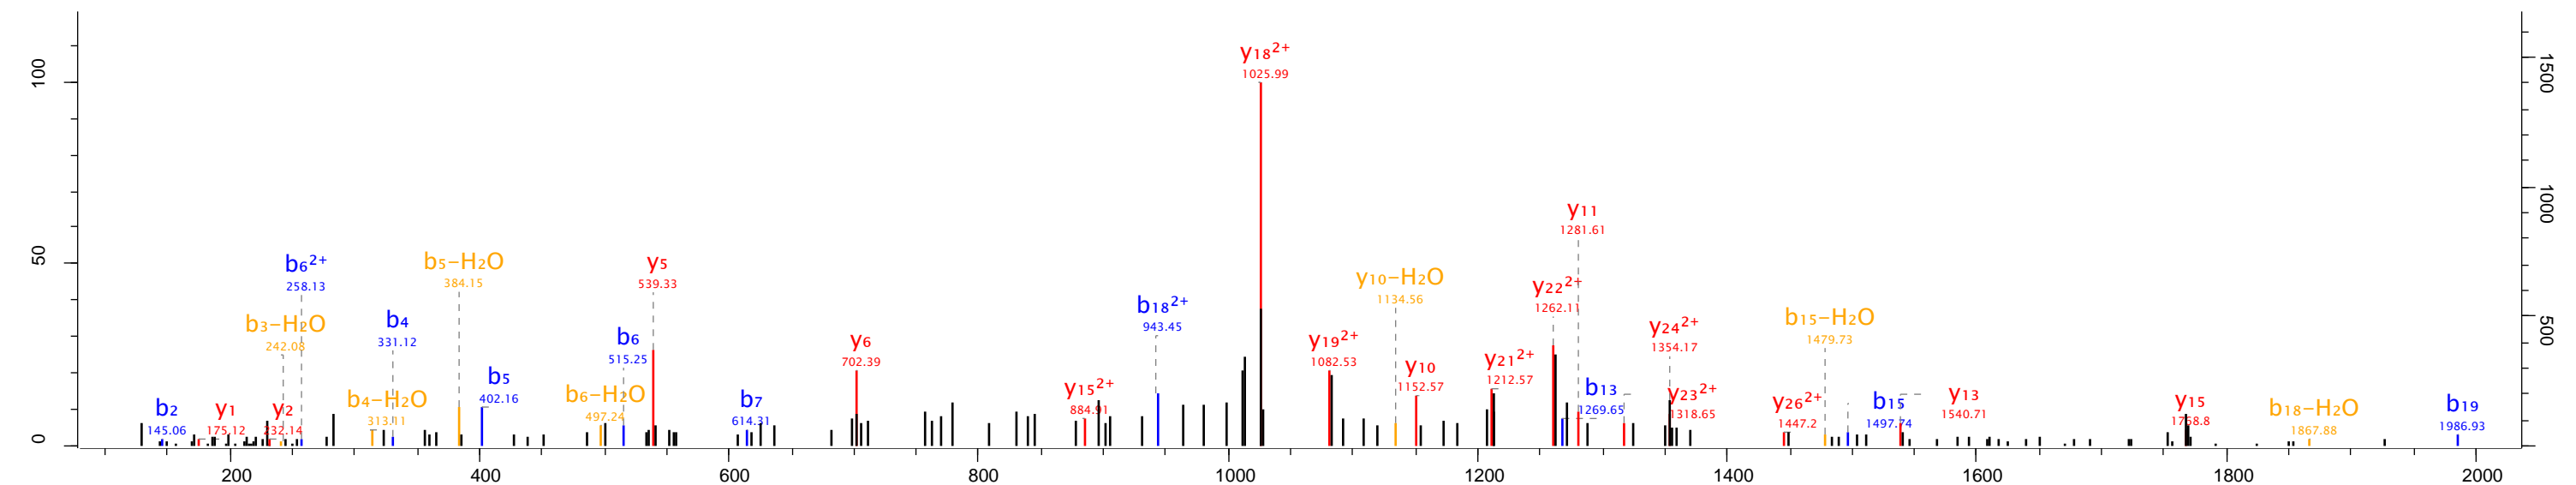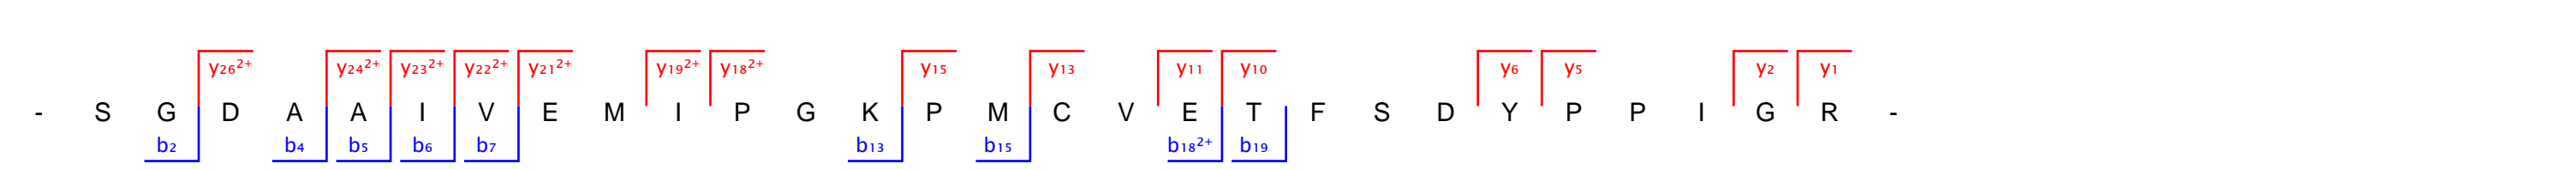

Spectral Annotation for Single-Peptide IDs between Single D11 Cells using Q-OT-LIT

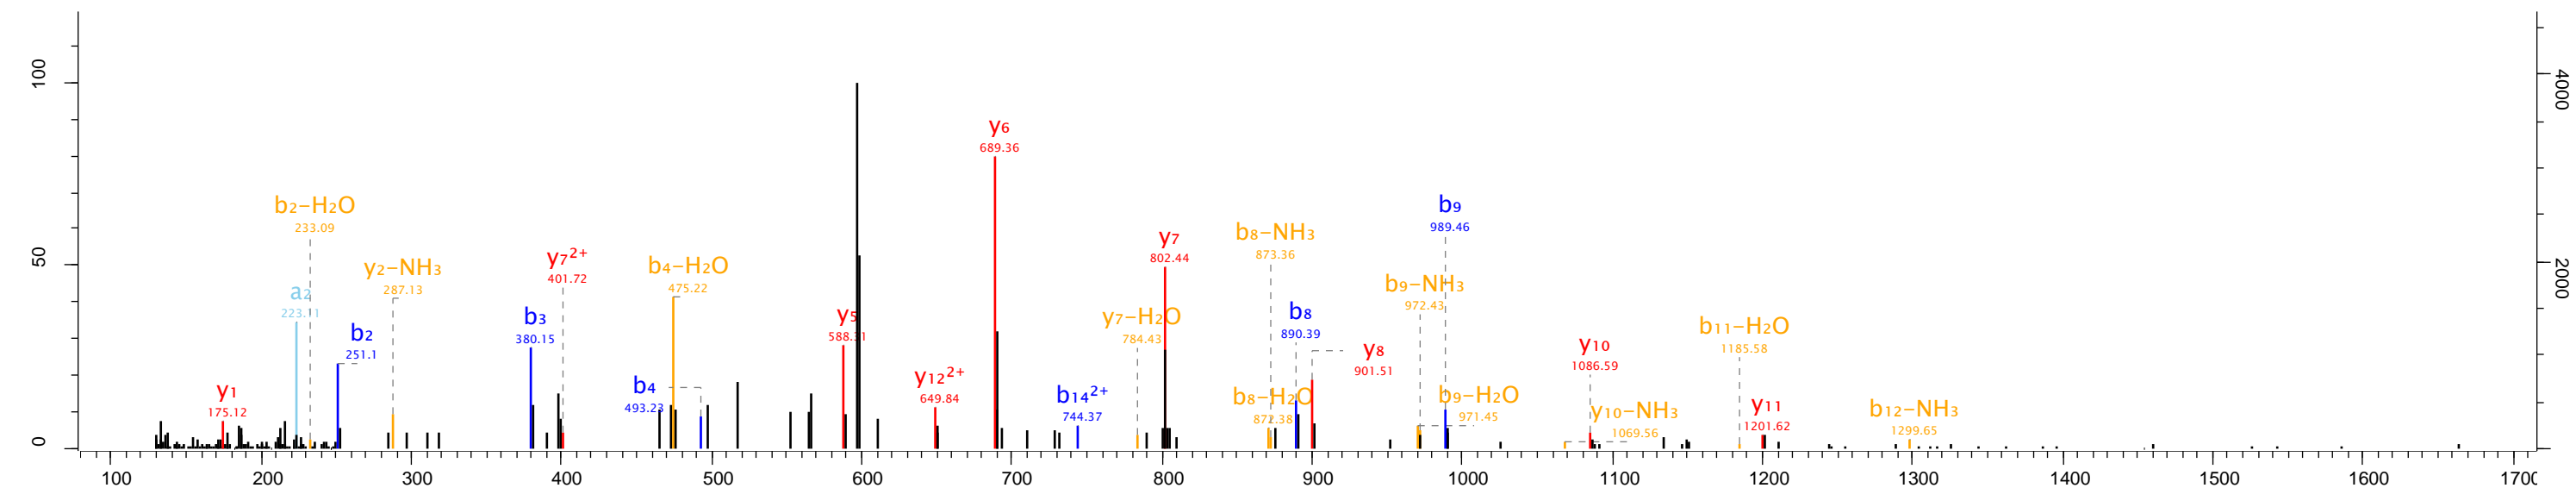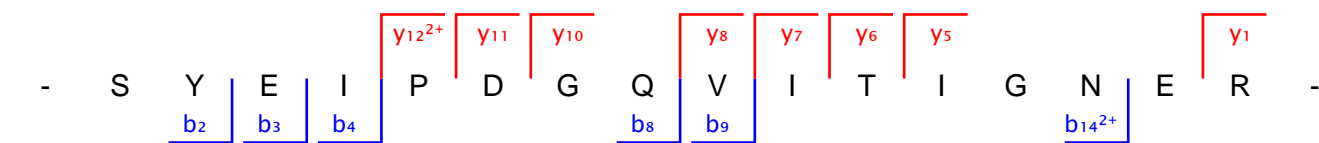

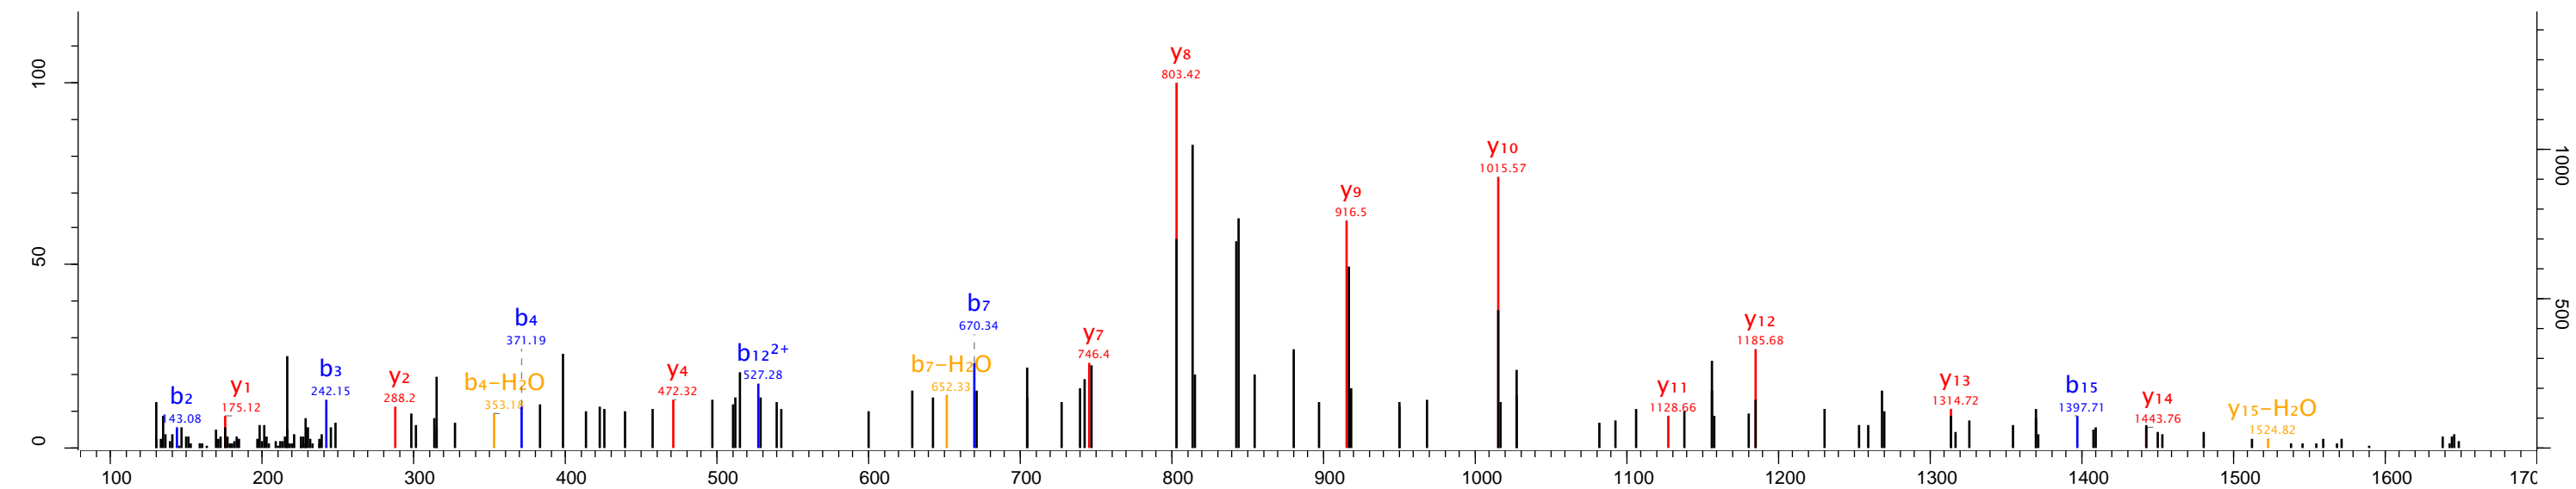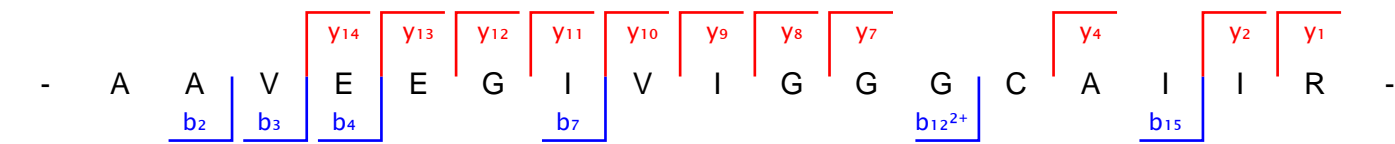

Raw file 2015-01-08\_CL04\_Blastomere-15 Scan 44221 Method ITMS; HCD Score 32.51 m/z 1013.82

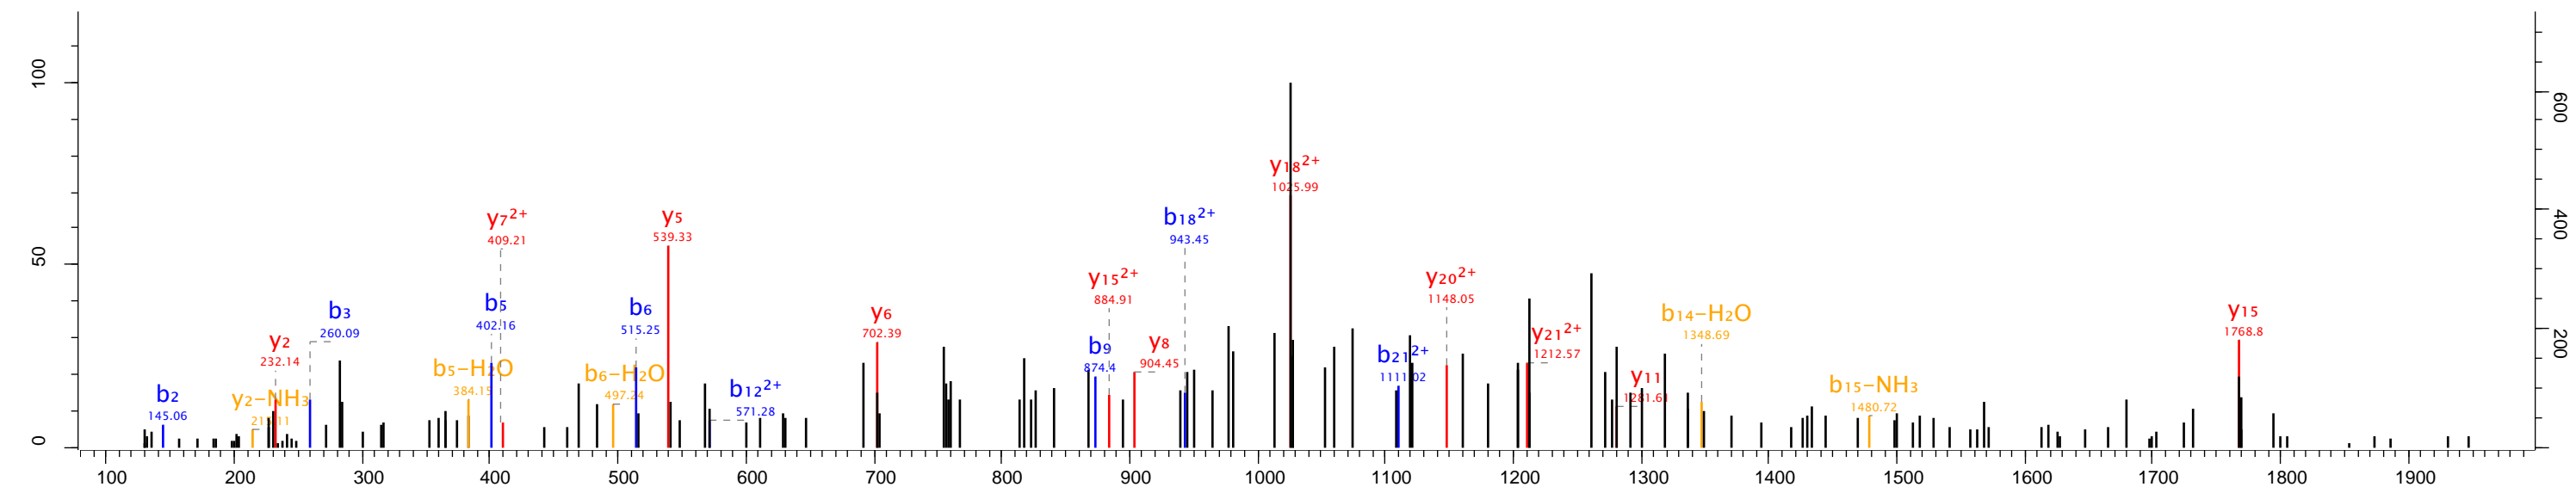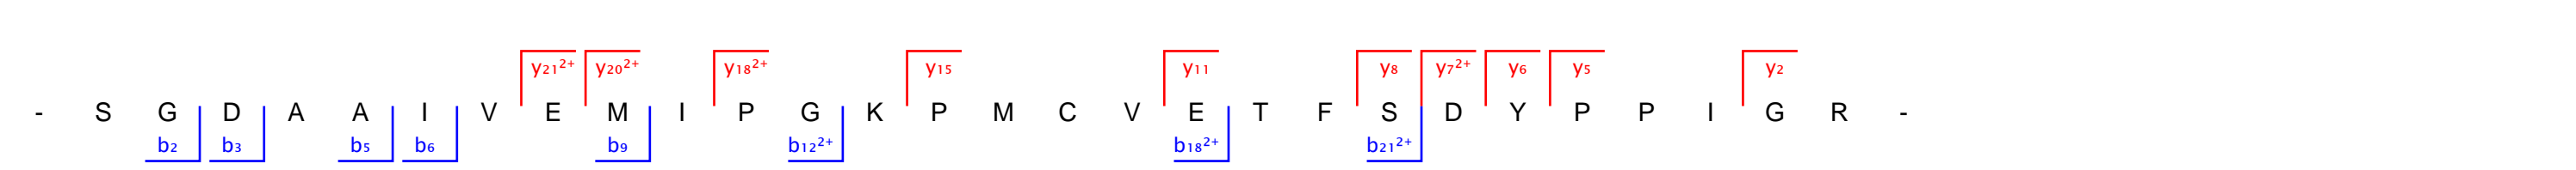

Raw file 2015-01-08\_CL04\_Blastomere-15 Scan 44263 Method ITMS; HCD Score 67.3 m/z 843.44

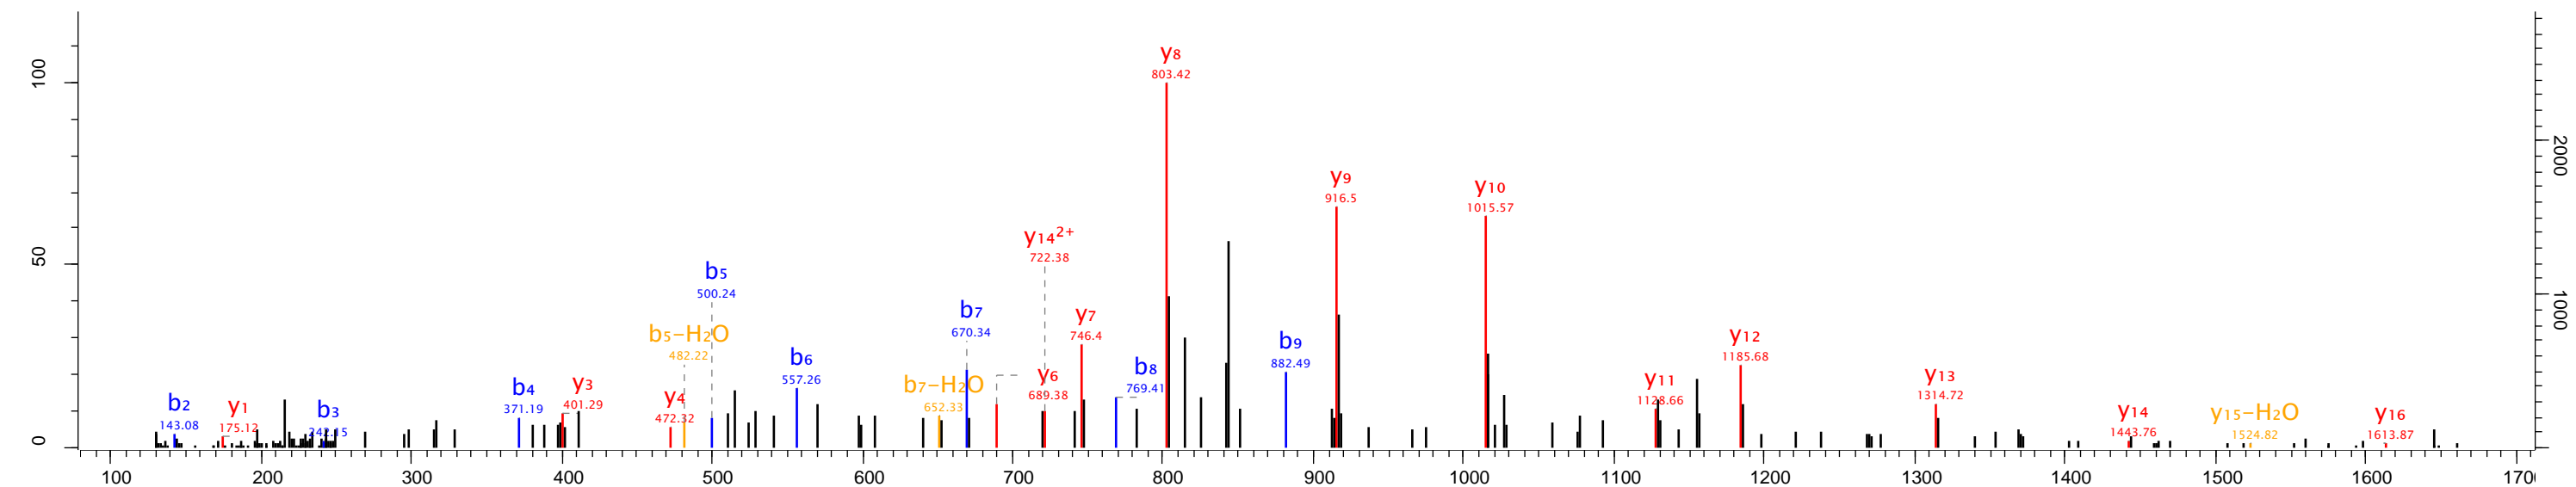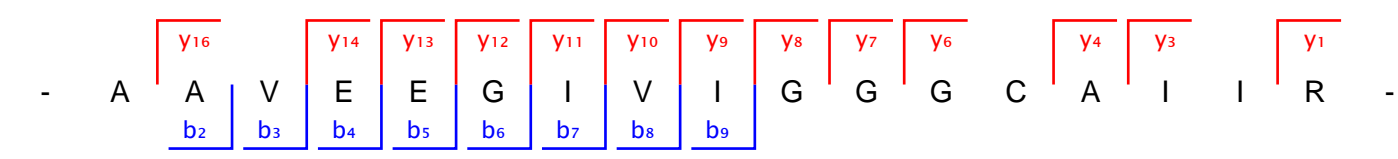



Raw file  
 2015-01-08\_CL04\_Blastomere-15  
 Scan 44299 Method ITMS; HCD Score 55.1 m/z 562.3

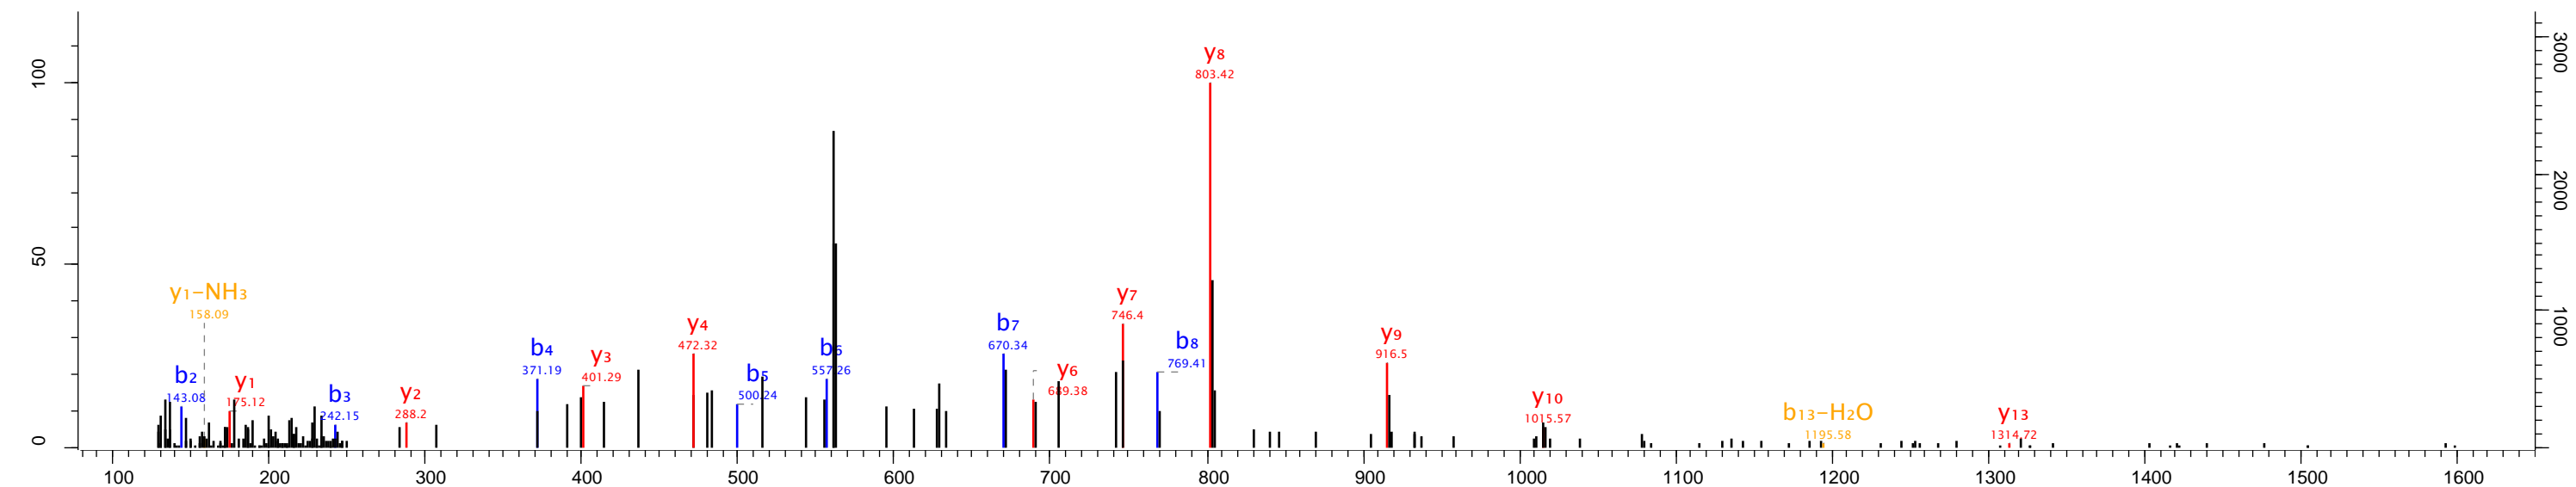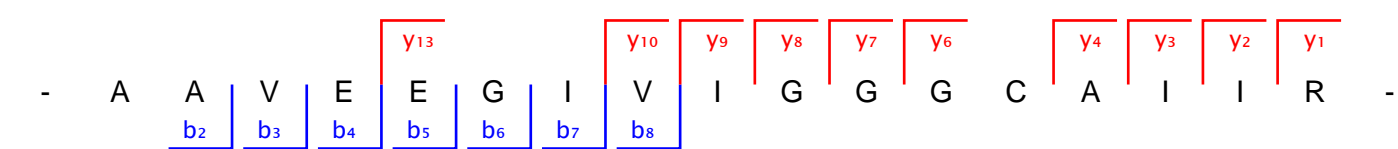

Raw file  
 2015-01-08\_CL04\_Blastomere-15  
 Scan 44315 Method ITMS; HCD Score 72.32 m/z 562.3

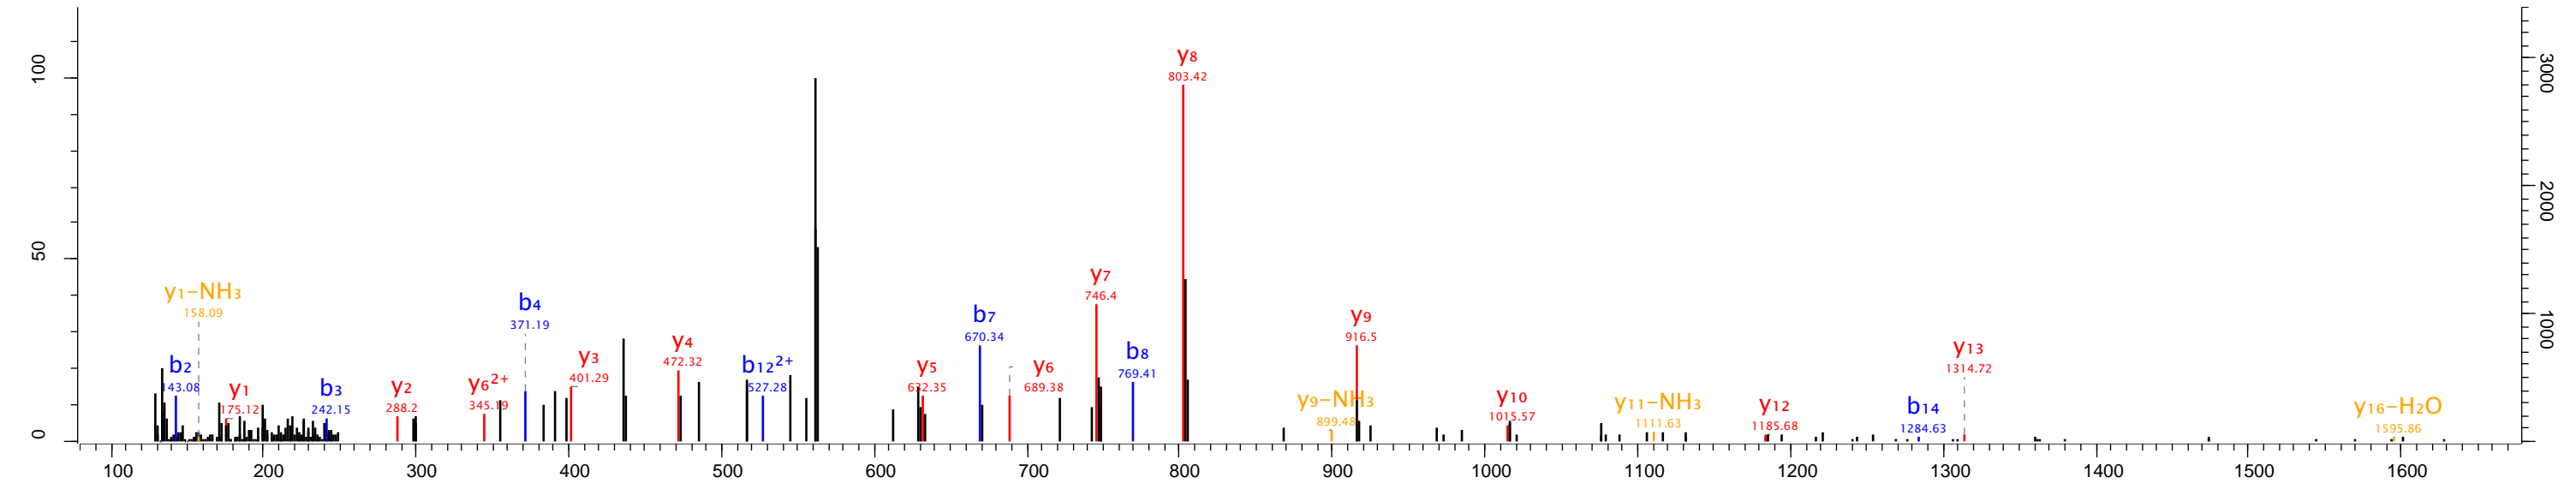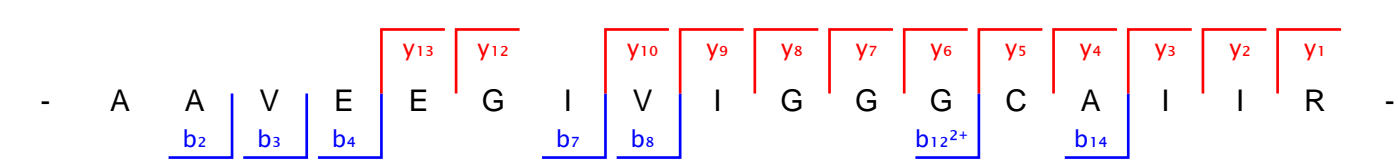

Spectral Annotation for Single-Peptide IDs between Single D11 Cells using Q-OT-LIT

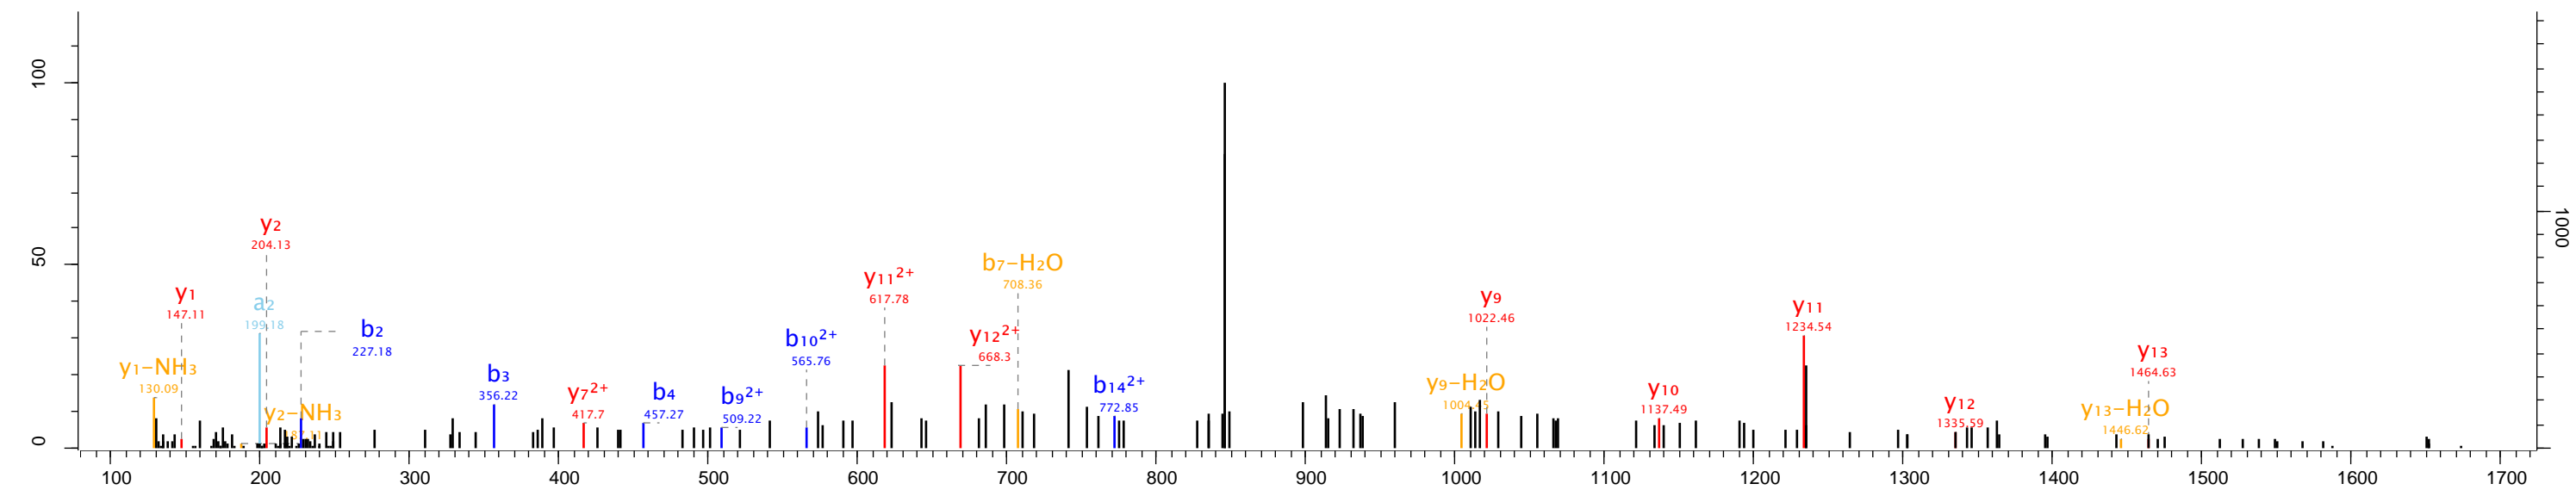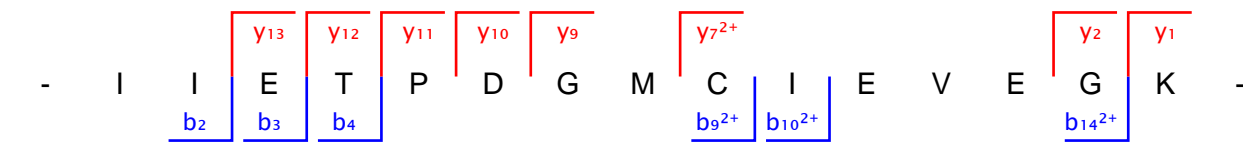

Raw file 2015-01-08\_CL04\_Blastomere-15 Scan 44396 Method ITMS; HCD Score 70.26 m/z 824.91

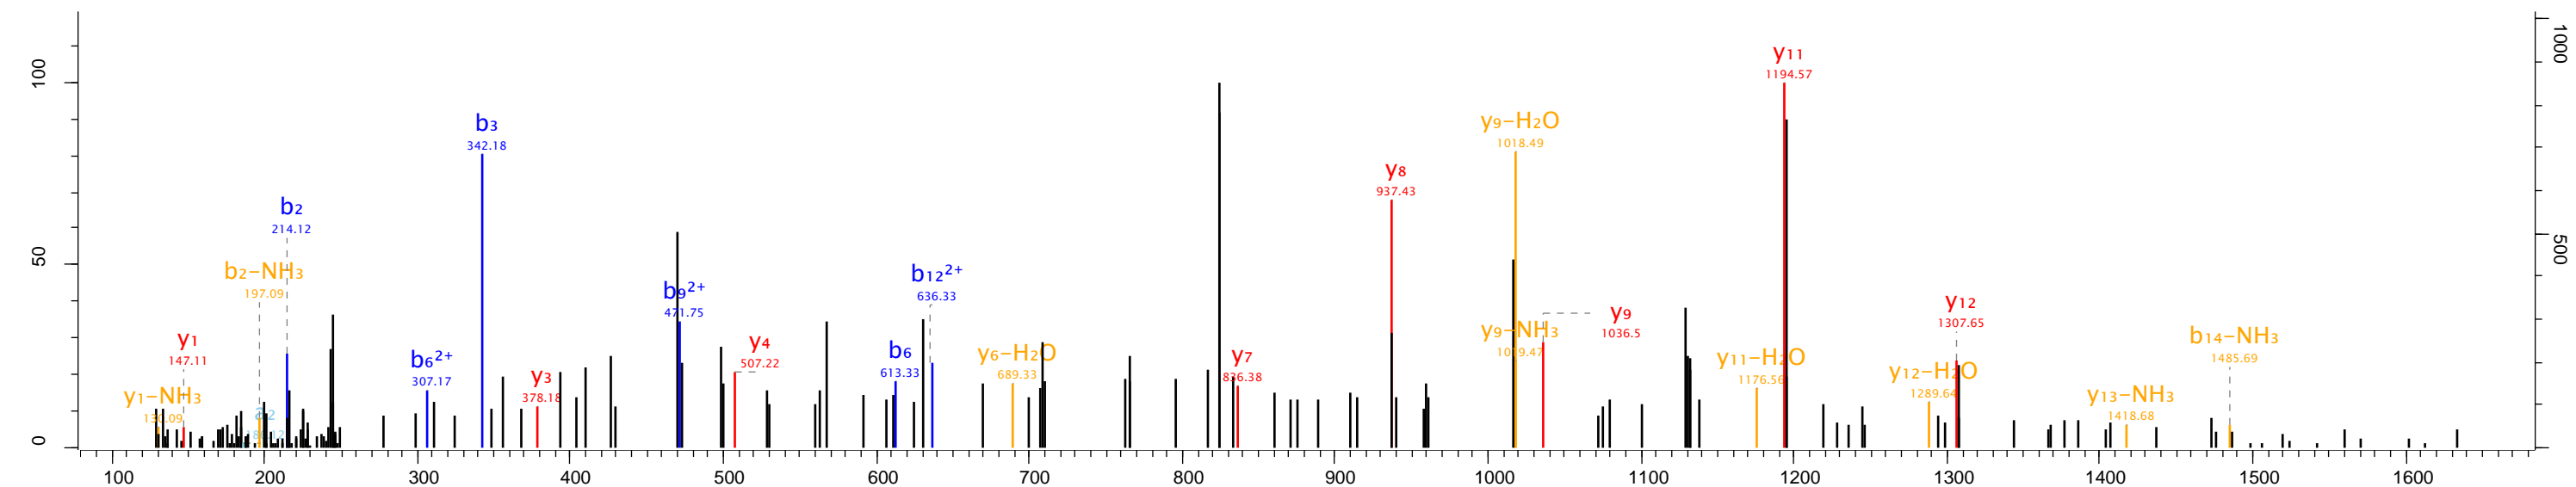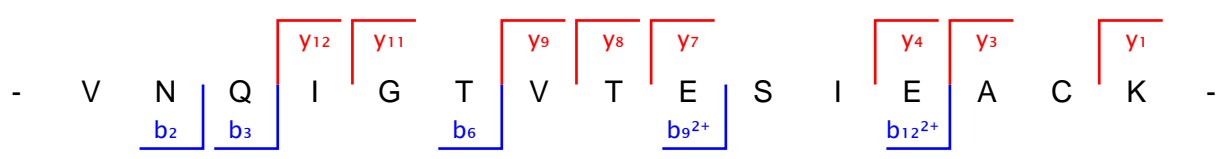

Spectral Annotation for Single-Peptide IDs between Single D11 Cells using Q-OT-LIT

Raw file 2015-01-08\_CL04\_Blastomere-15 Scan 44428 Method ITMS; HCD Score 60.97 m/z 824.92

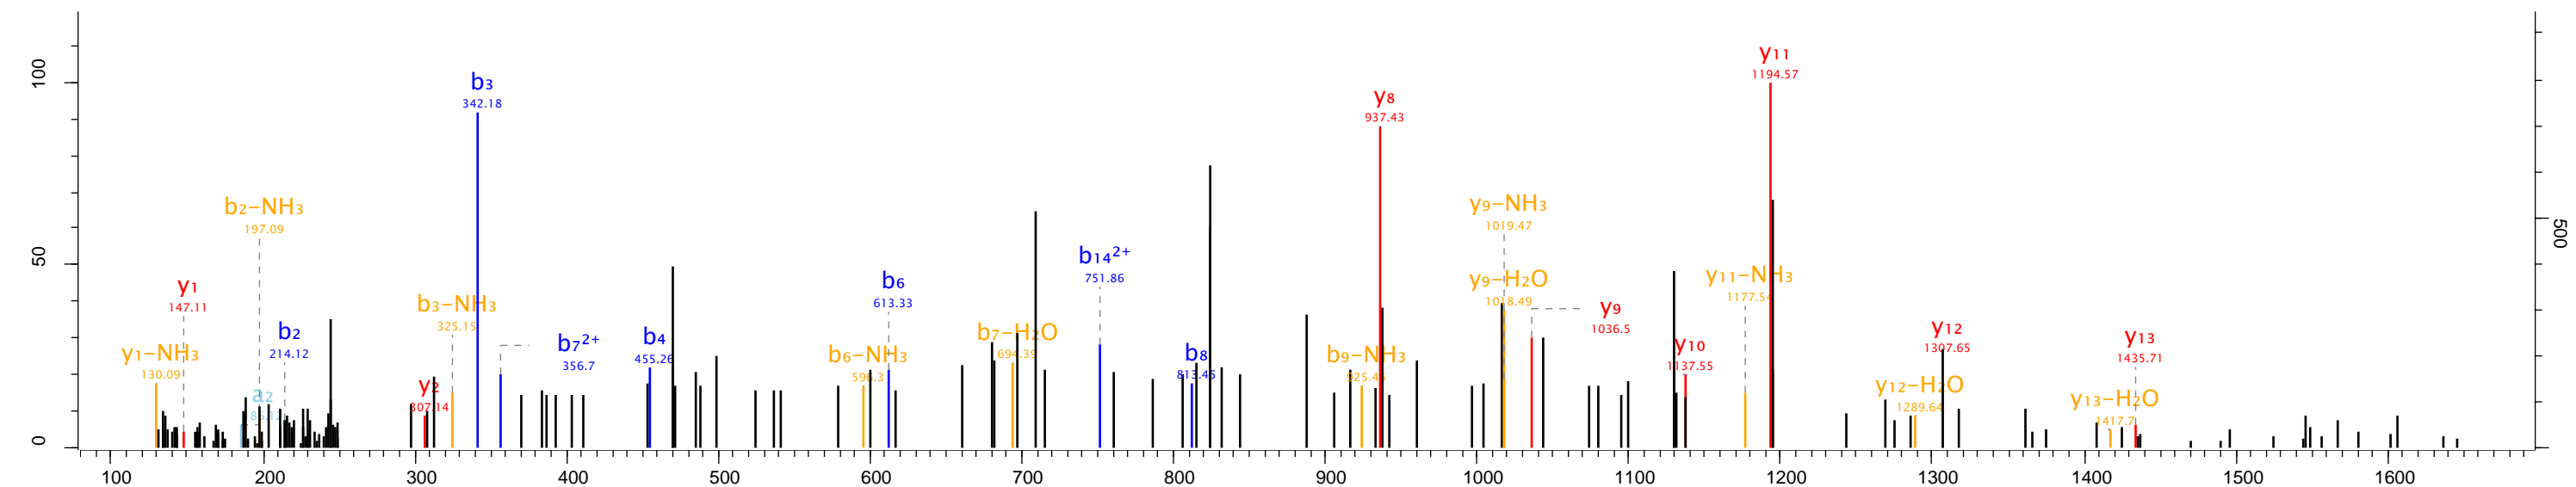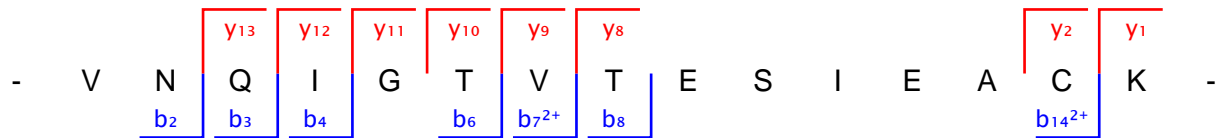

Spectral Annotation for Single-Peptide IDs between Single D11 Cells using Q-OT-LIT

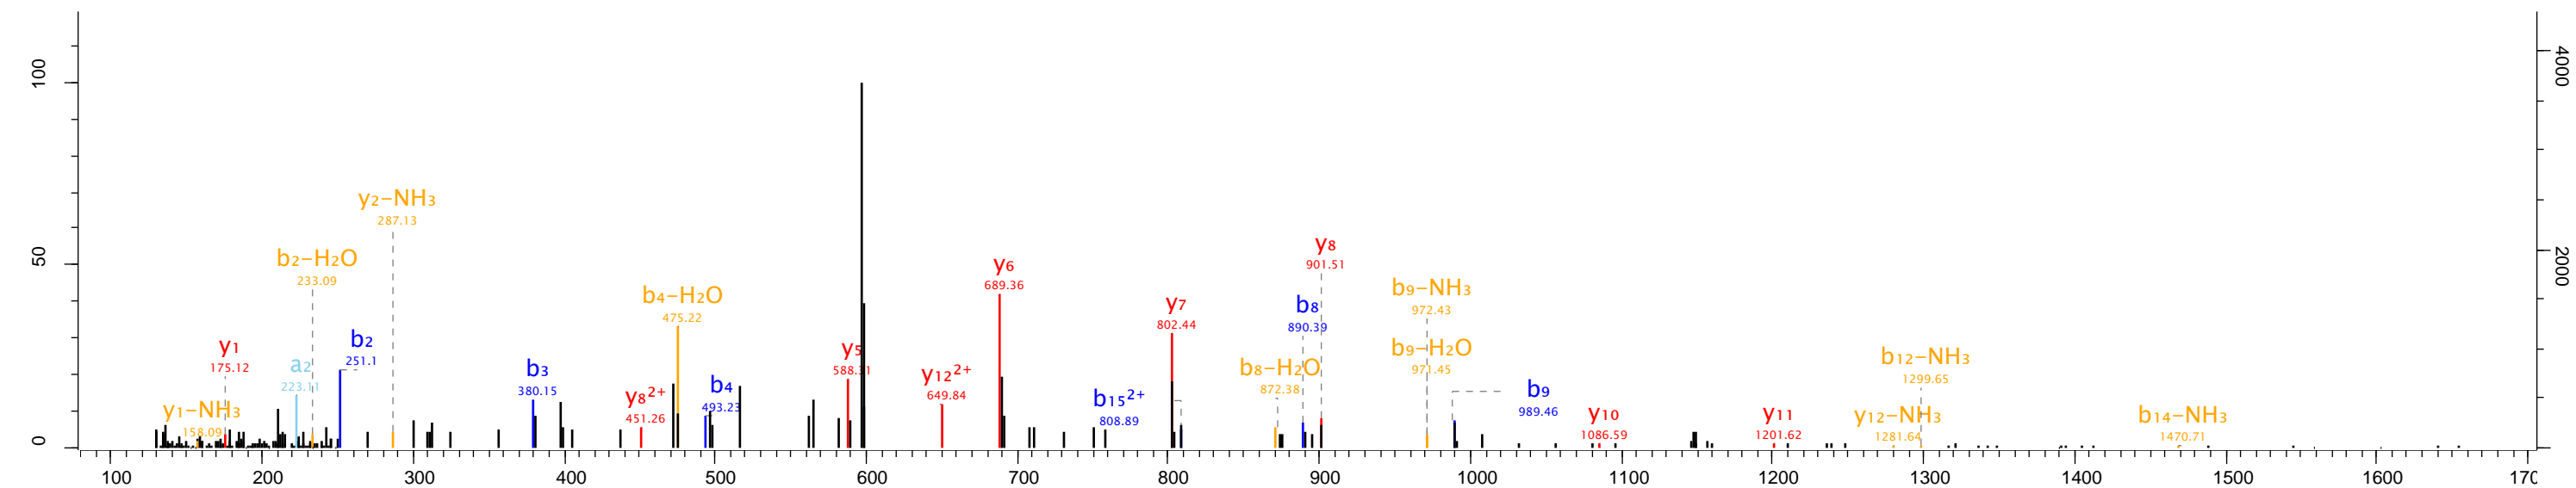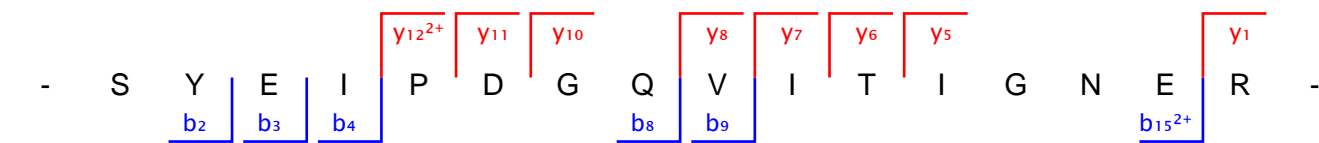

Raw file: 2015-01-08\_CL04\_Blastomere-15  
 Scan: 44523 Method: ITMS; HCD Score: 78.25 m/z: 597.63

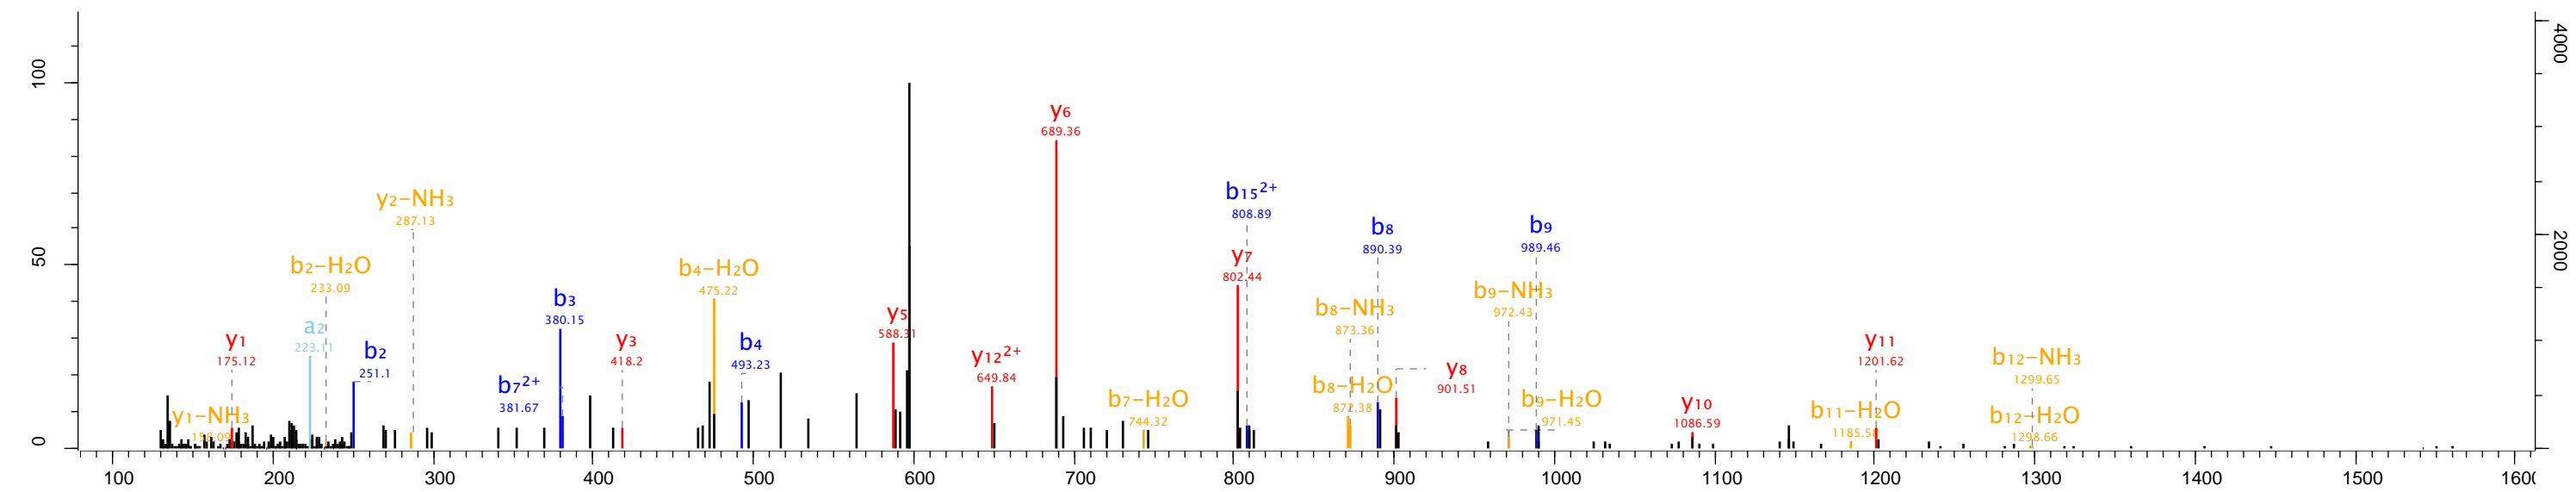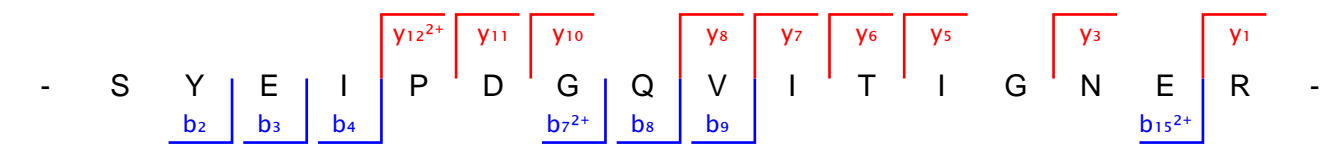

Spectral Annotation for Single-Peptide IDs between Single D11 Cells using Q-OT-LIT

Raw file 2015-01-08\_CL04\_Blastomere-15 Scan 44528 Method ITMS; HCD Score 119.47 m/z 895.95

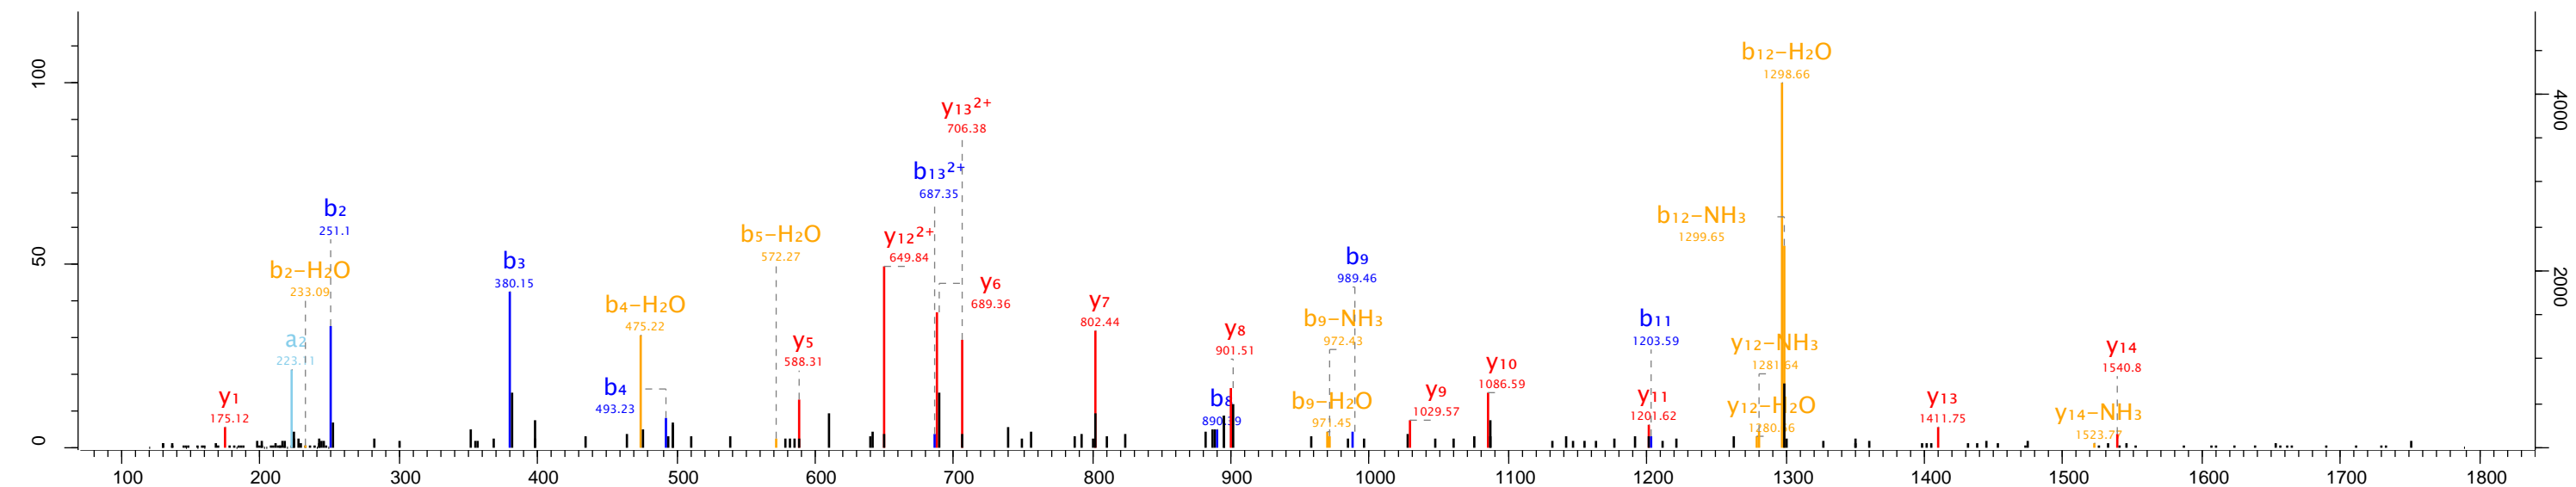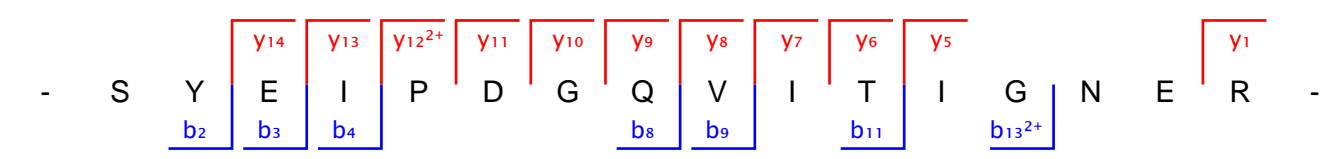

Spectral Annotation for Single-Peptide IDs between Single D11 Cells using Q-OT-LIT



Raw file 2015-01-08\_CL04\_Blastomere-15 Scan 44545 Method ITMS; HCD Score 87.39 m/z 597.63

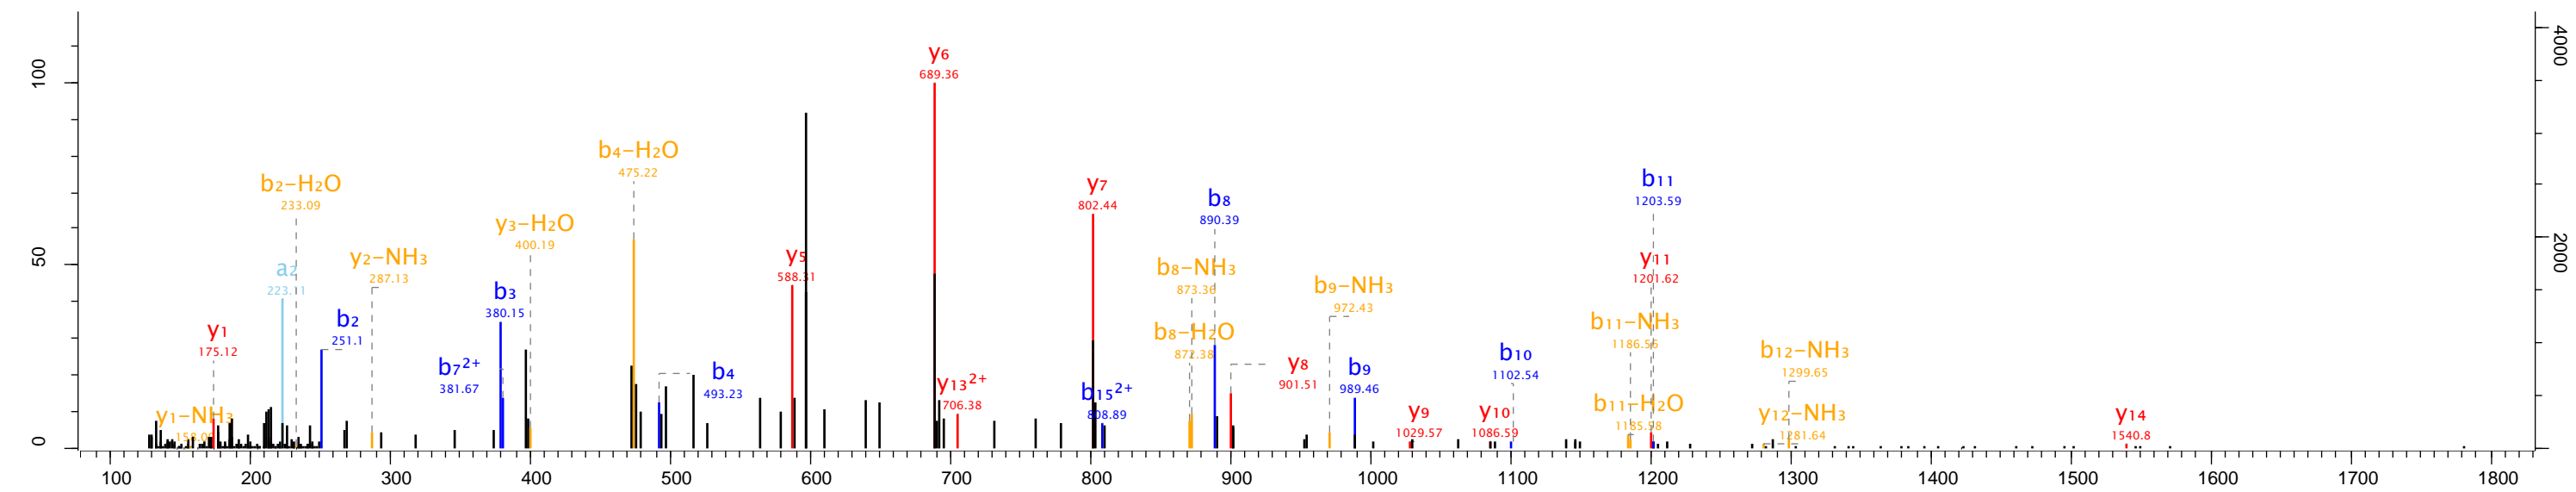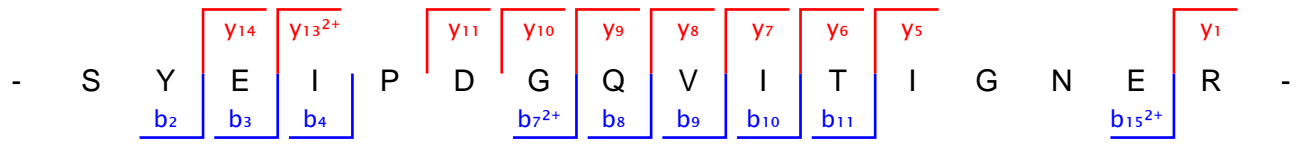

Spectral Annotation for Single-Peptide IDs between Single D11 Cells using Q-OT-LIT

Raw file: 2015-01-08\_CL04\_Blastomere-15  
 Scan: 44807 Method: ITMS; HCD Score: 109.04 m/z: 896.45

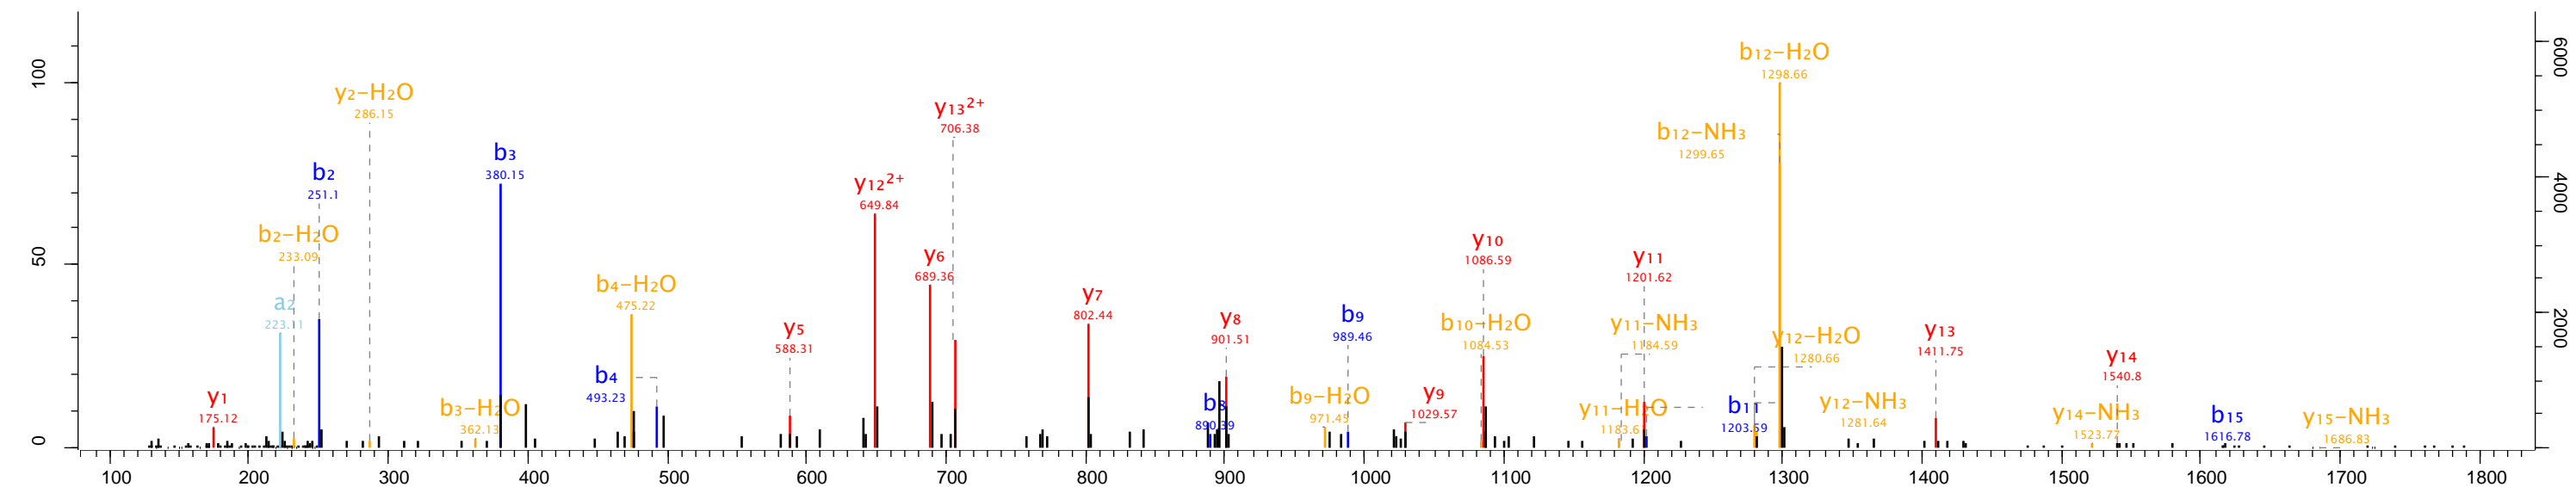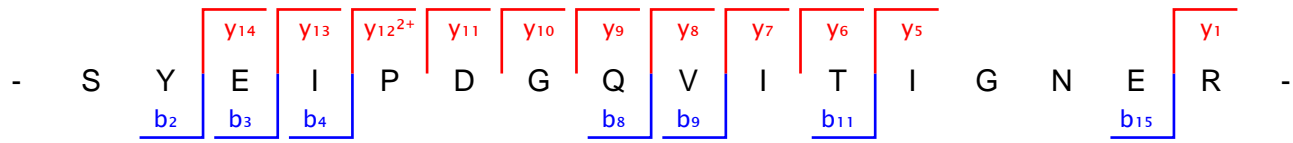

Spectral Annotation for Single-Peptide IDs between Single D11 Cells using Q-OT-LIT

Raw file 2015-01-08\_CL04\_Blastomere-15 Scan 44824 Method ITMS; HCD Score 53.26 m/z 597.63

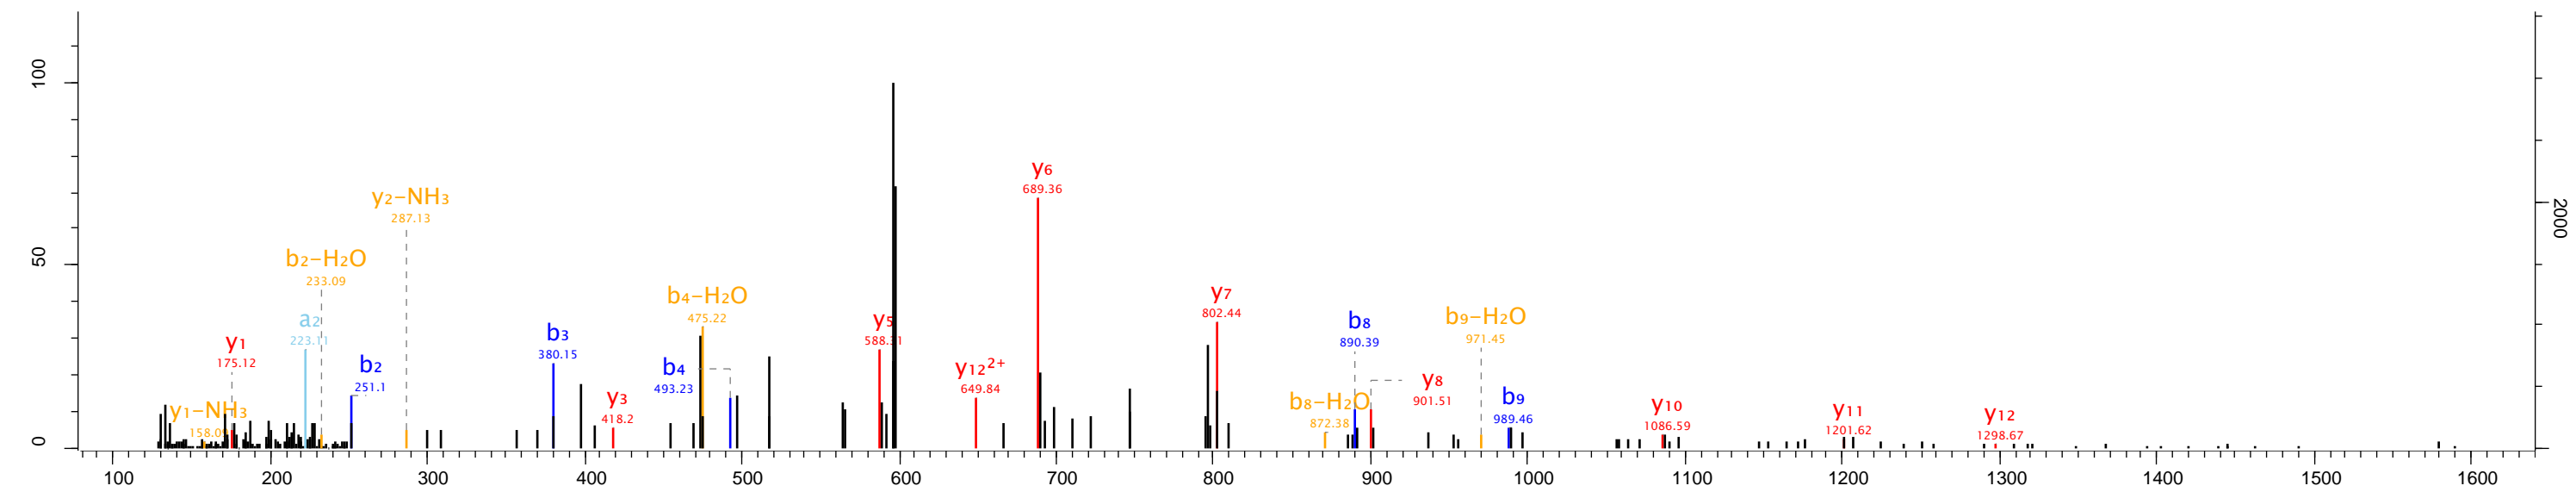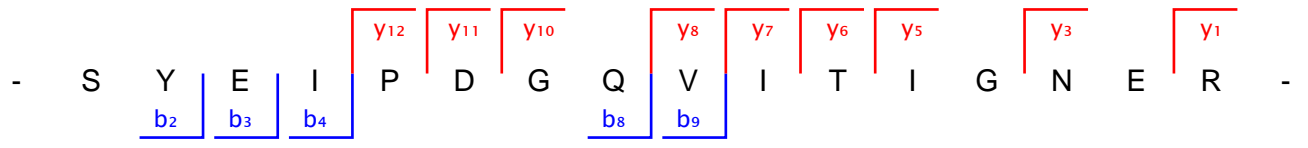

Spectral Annotation for Single-Peptide IDs between Single D11 Cells using Q-OT-LIT

Raw file: 2015-01-08\_CL04\_Blastomere-15  
 Scan: 45052 Method: ITMS; HCD Score: 70.41 m/z: 930.93

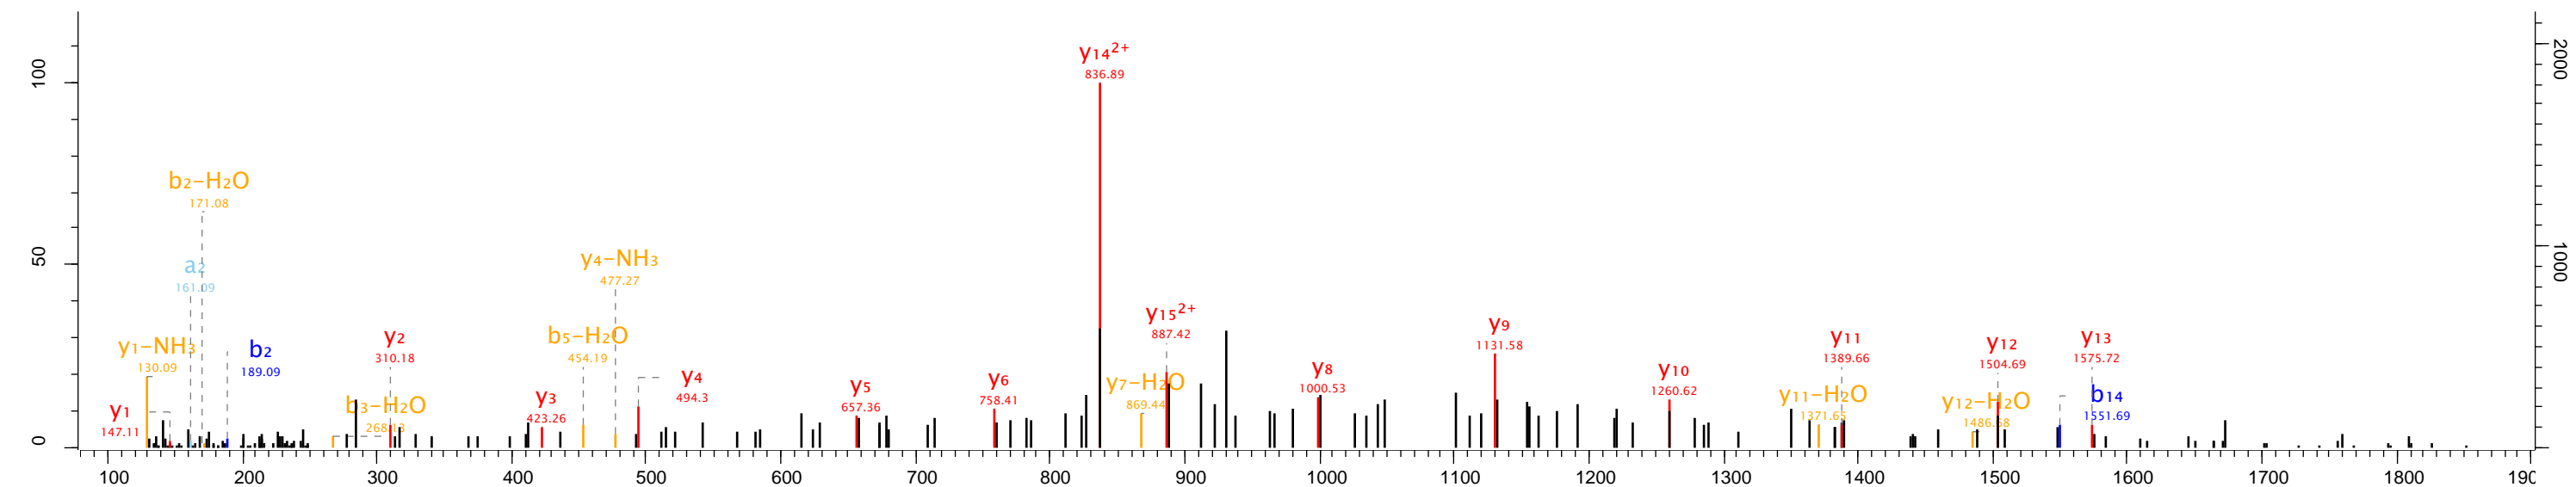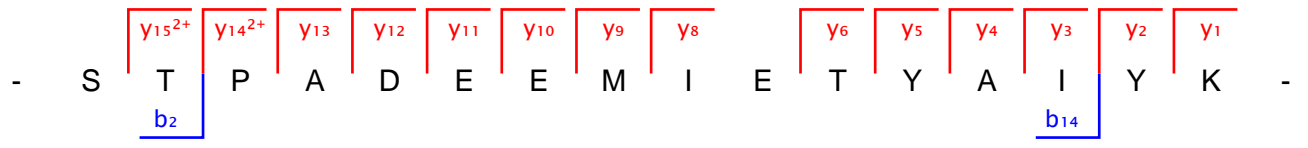

Spectral Annotation for Single-Peptide IDs between Single D11 Cells using Q-OT-LIT

Raw file 2015-01-08\_CL04\_Blastomere-15 Scan 45053 Method ITMS; HCD Score 85.29 m/z 884.96

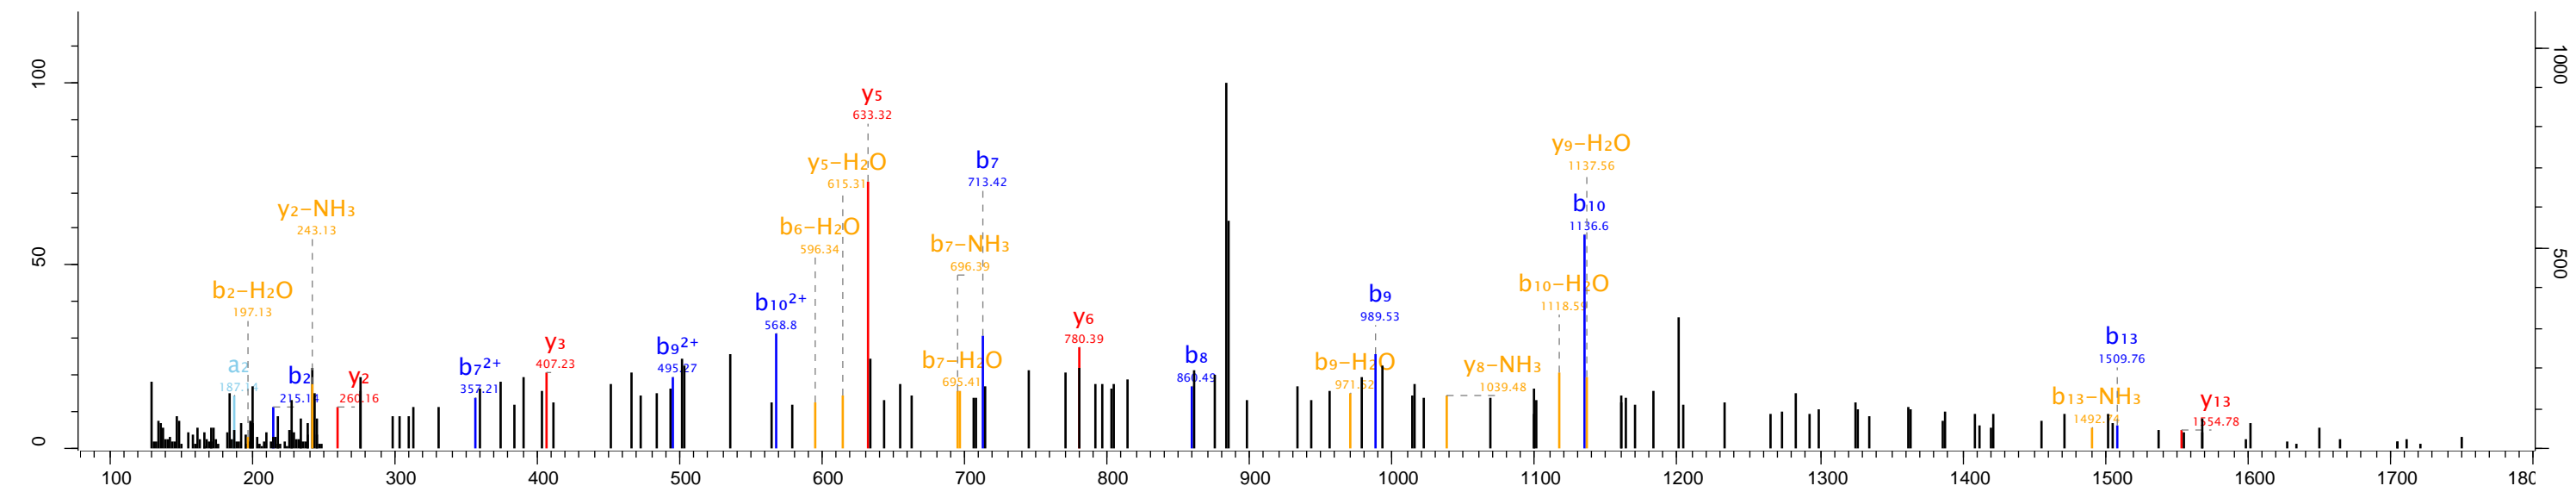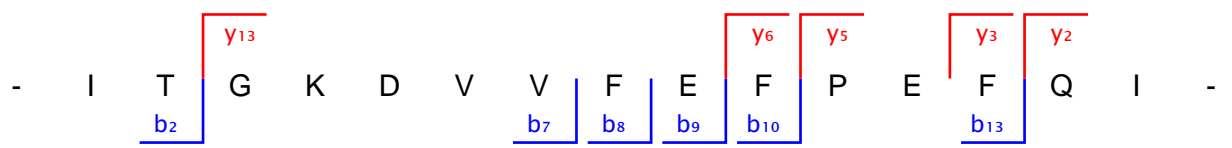

Spectral Annotation for Single-Peptide IDs between Single D11 Cells using Q-OT-LIT

Raw file 2015-01-08\_CL04\_Blastomere-15 Scan 45340 Method ITMS; HCD Score 39.58 m/z 1059.17

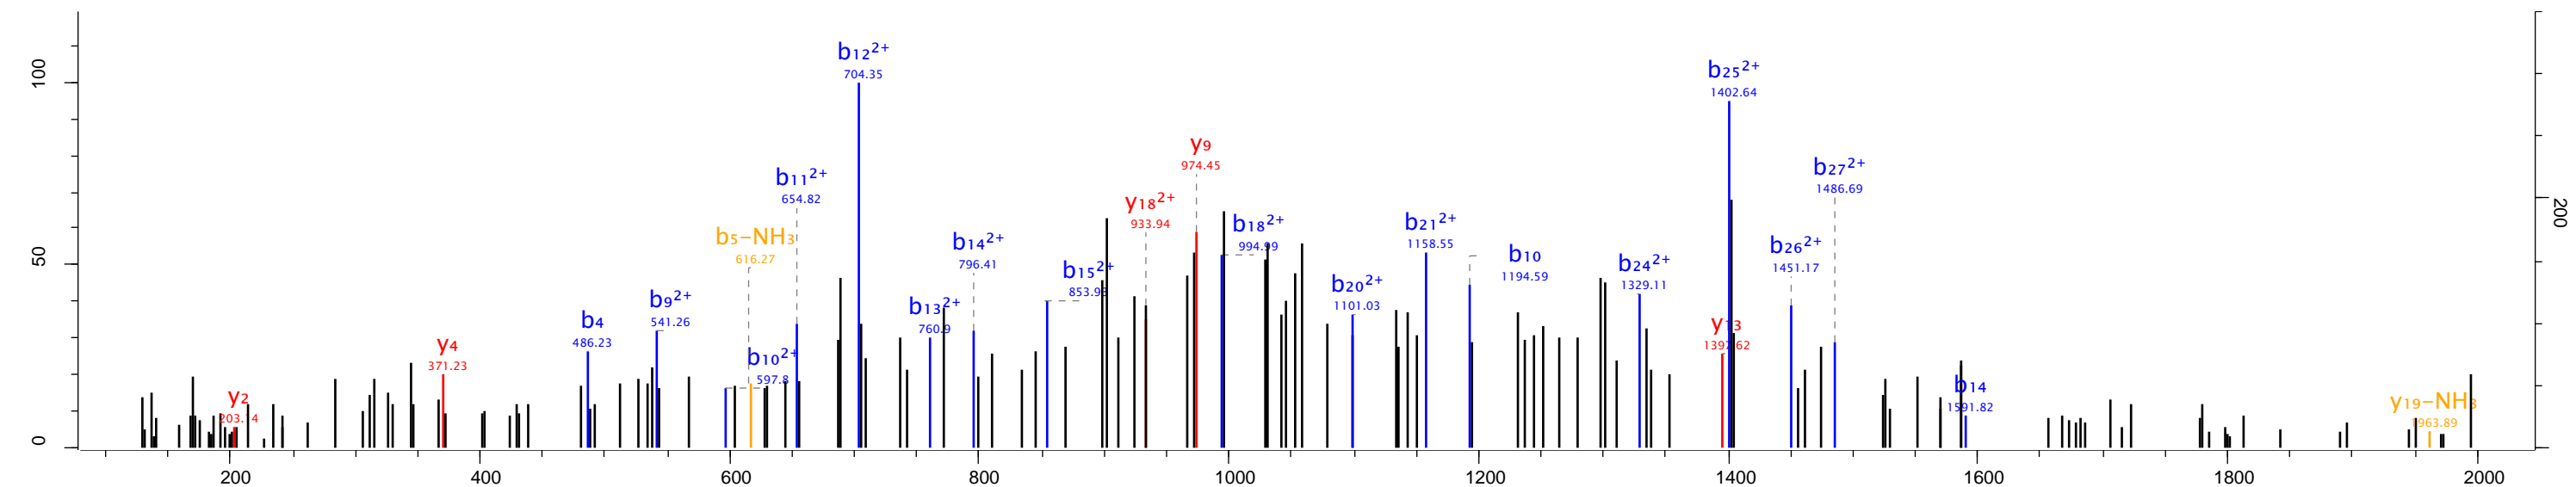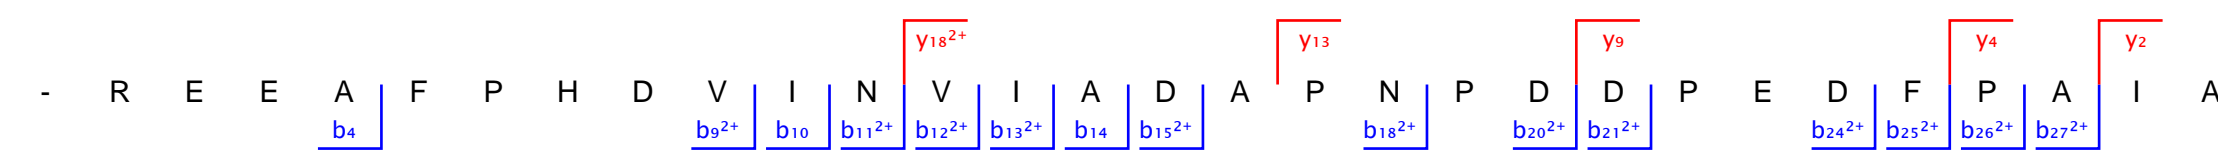

Spectral Annotation for Single-Peptide IDs between Single D11 Cells using Q-OT-LIT

Raw file 2015-01-08\_CL04\_Blastomere-15  
 Scan 45351 Method ITMS; HCD Score 38.36 m/z 1059.16

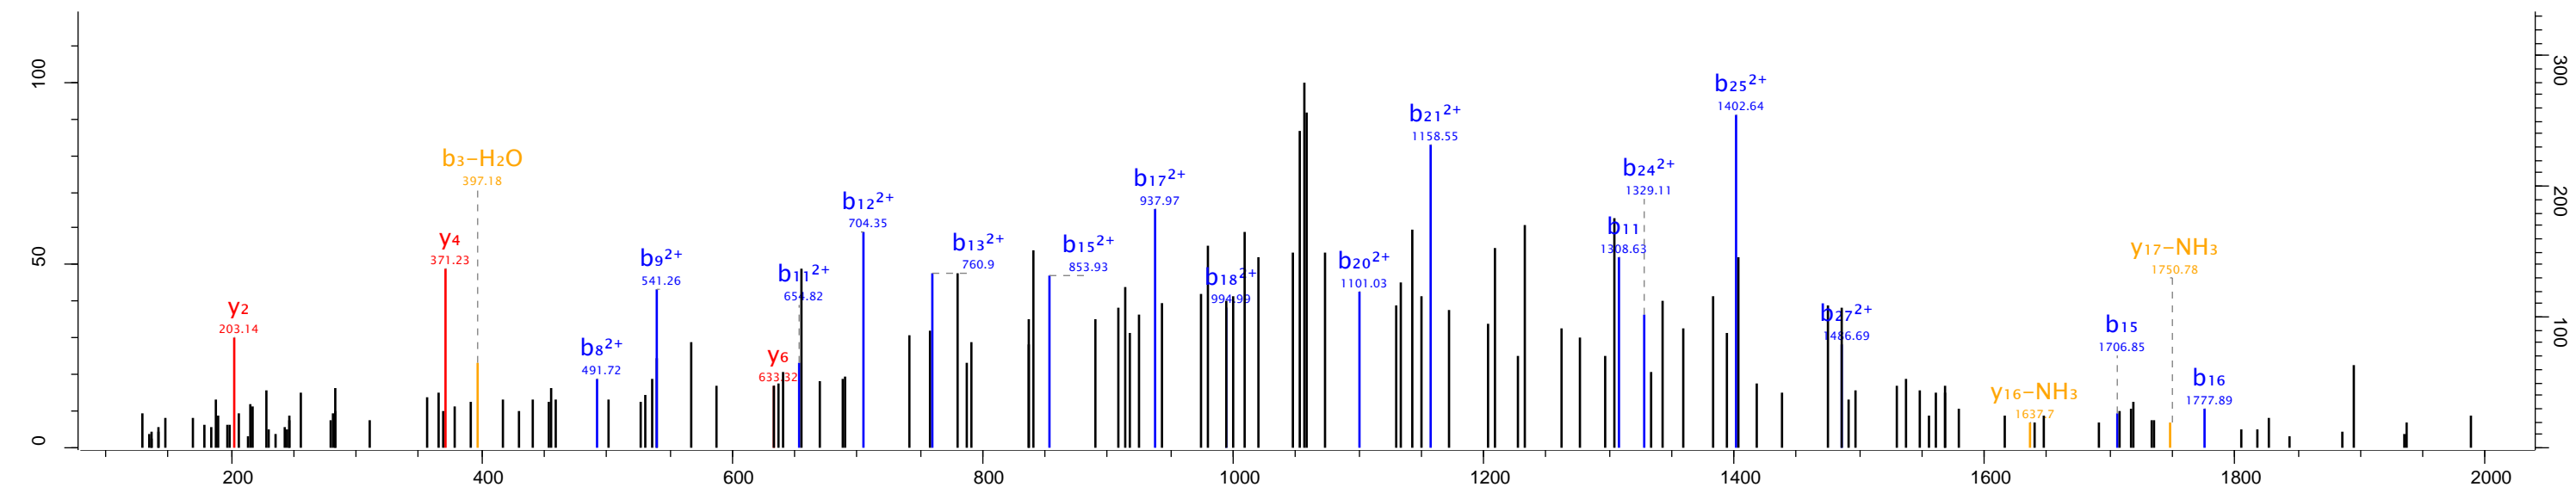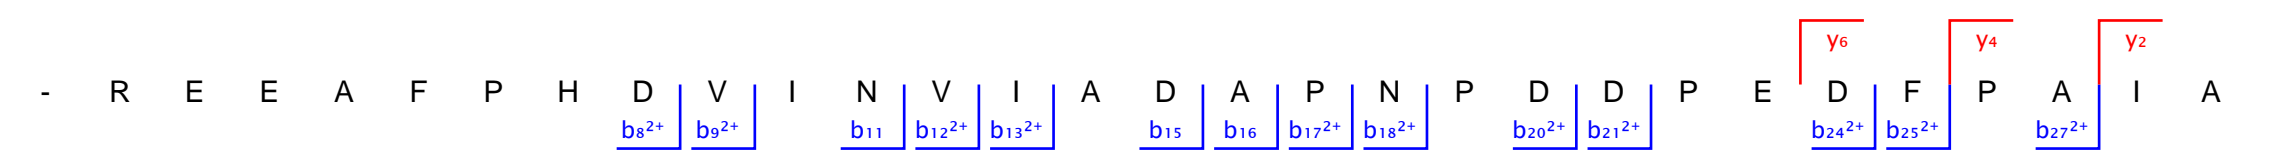

Raw file: 2015-01-08\_CL04\_Blastomere-15  
 Scan: 45399 Method: ITMS; HCD Score: 84.41 m/z: 953.44

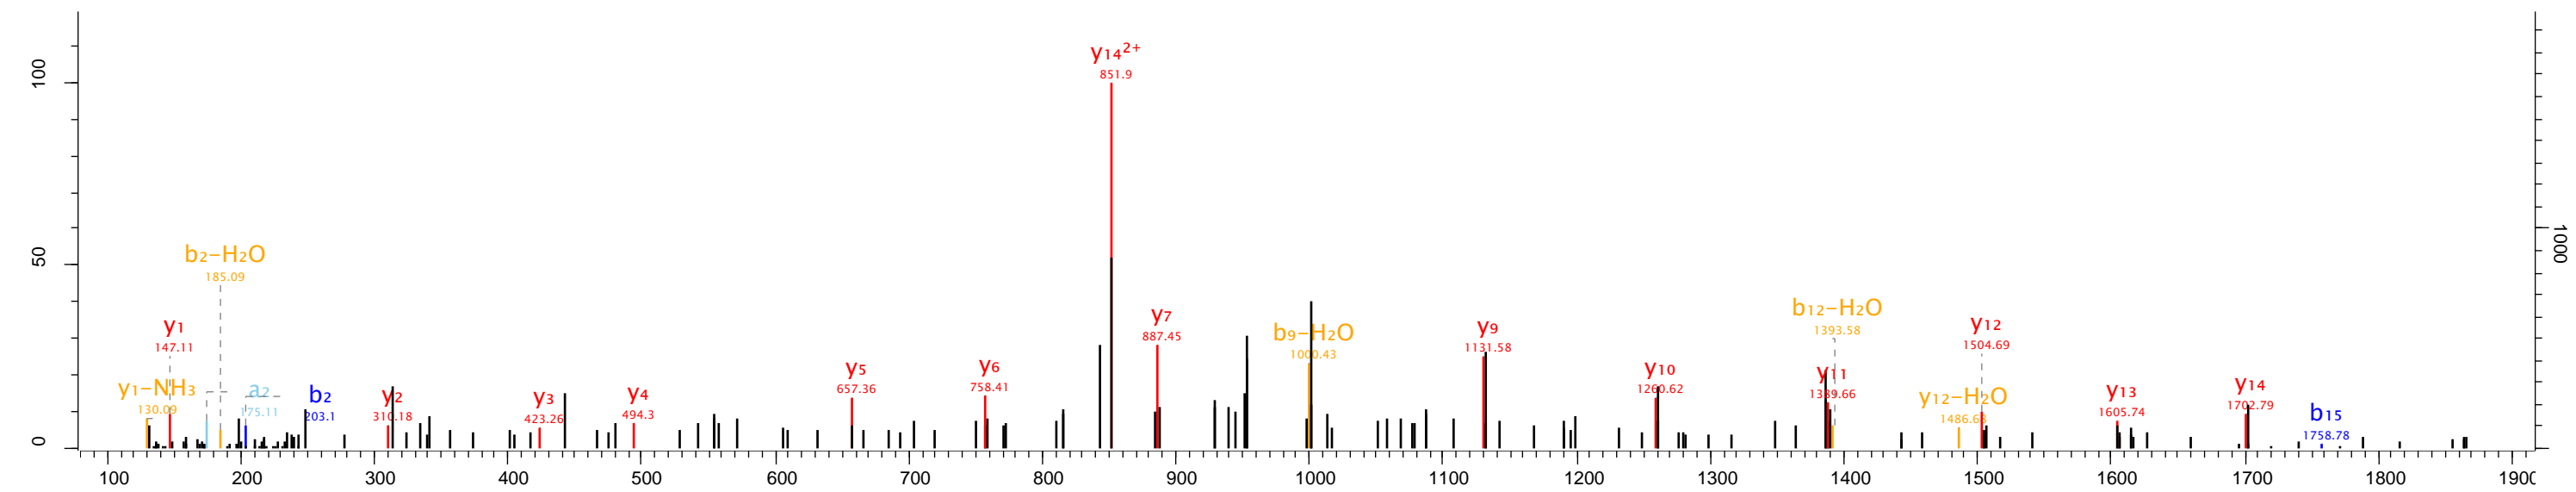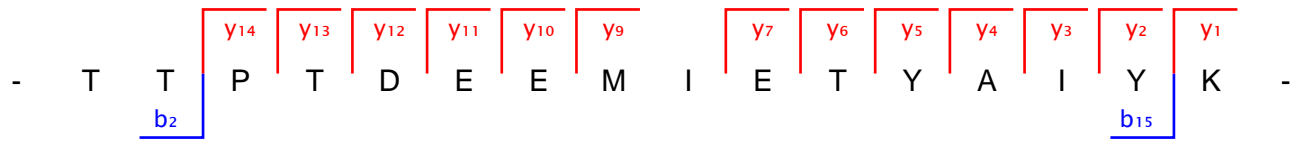

Spectral Annotation for Single-Peptide IDs between Single D11 Cells using Q-OT-LIT



Raw file 2015-01-08\_CL04\_Blastomere-15 Scan 45548 Method ITMS; HCD Score 51.76 m/z 952.46

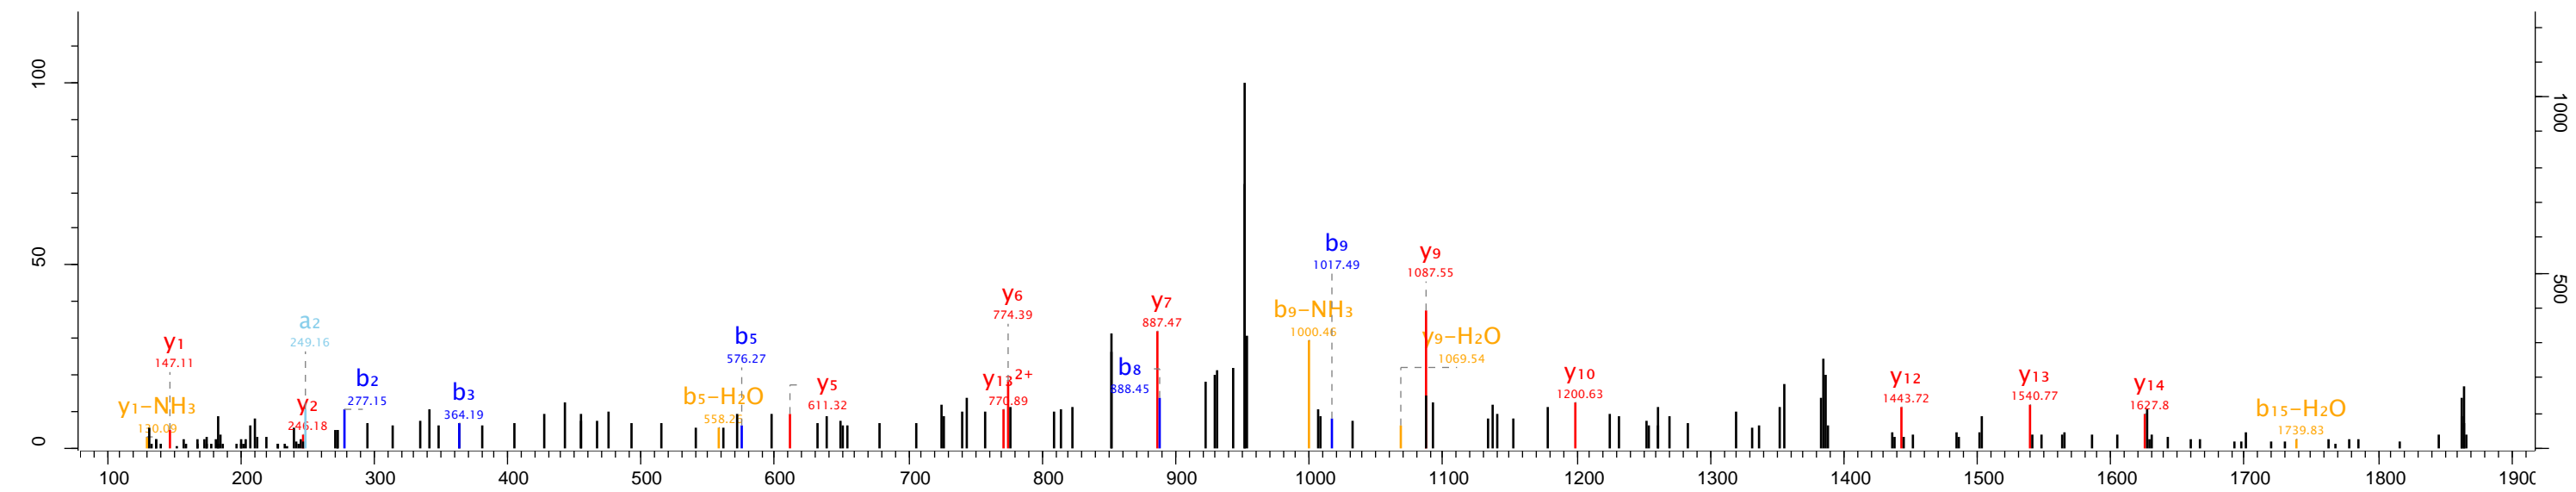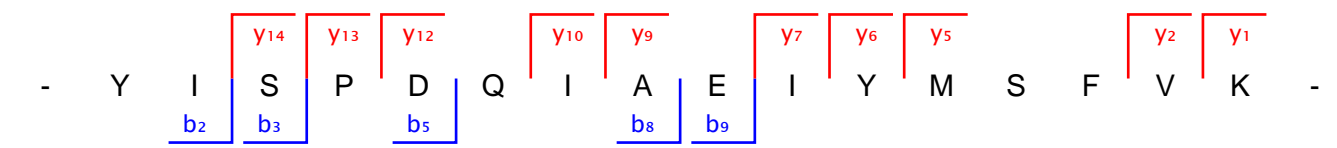

Spectral Annotation for Single-Peptide IDs between Single D11 Cells using Q-OT-LIT

Raw file 2015-01-08\_CL04\_Blastomere-15  
 Scan 45586 Method ITMS; HCD Score 28.41 m/z 1063.84

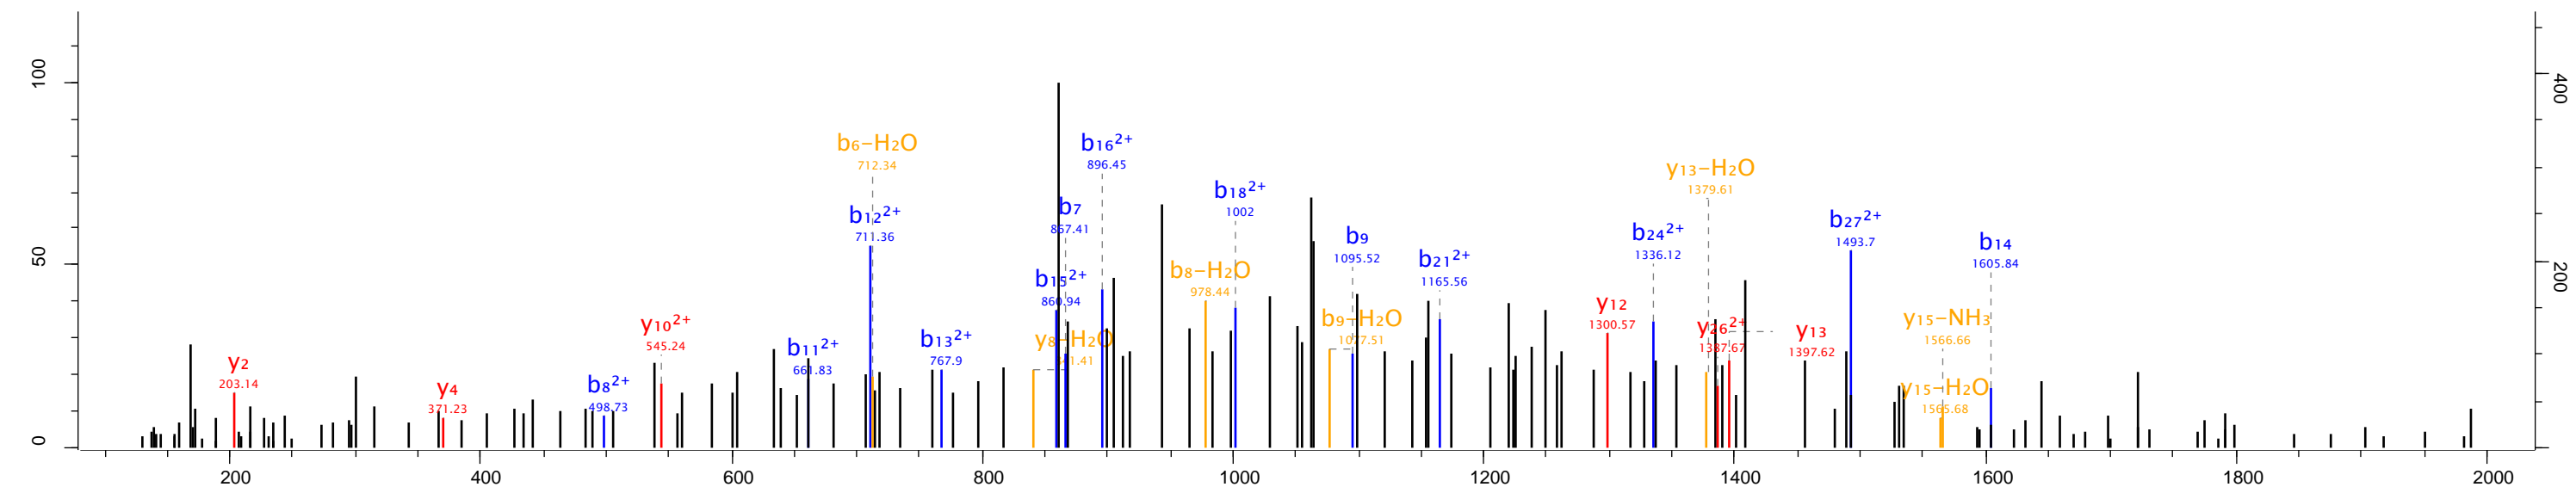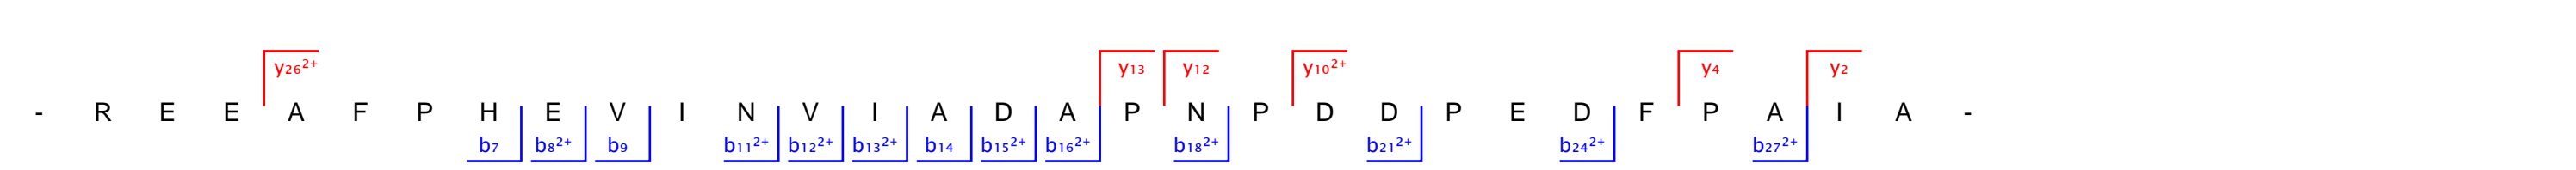

Spectral Annotation for Single-Peptide IDs between Single D11 Cells using Q-OT-LIT

Raw file: 2015-01-08\_CL04\_Blastomere-15  
 Scan: 45600 Method: ITMS; HCD Score: 29.56 m/z: 1063.84

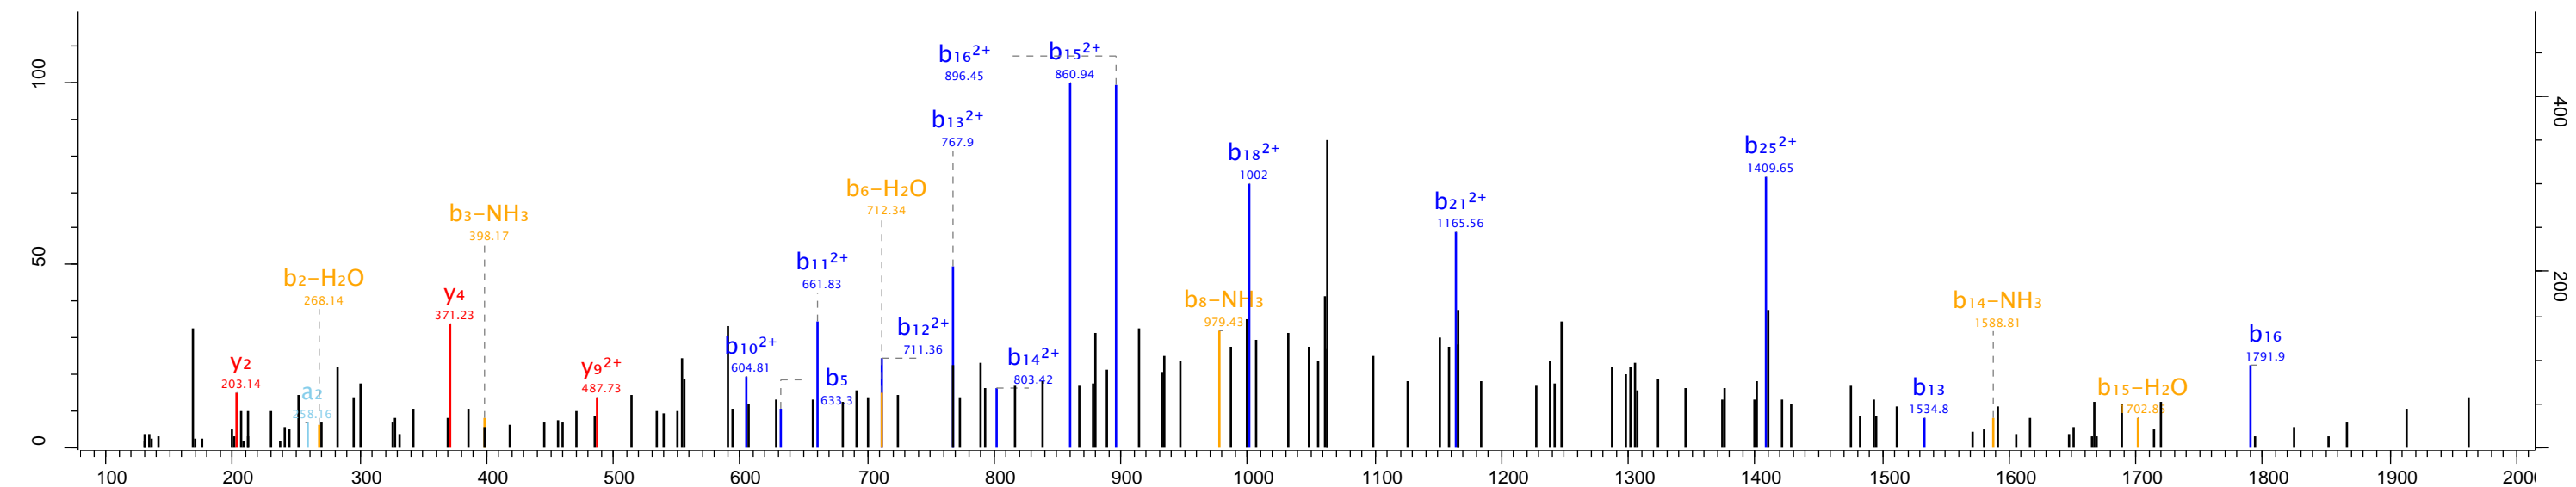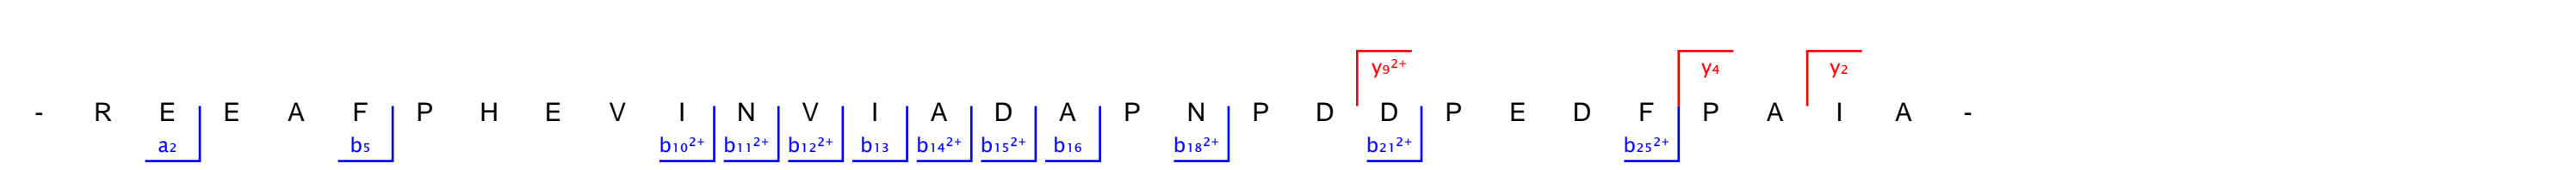

Spectral Annotation for Single-Peptide IDs between Single D11 Cells using Q-OT-LIT

Raw file  
 2015-01-08\_CL04\_Blastomere-15  
 Scan 45607 Method ITMS; HCD Score 63.14 m/z 1059.17

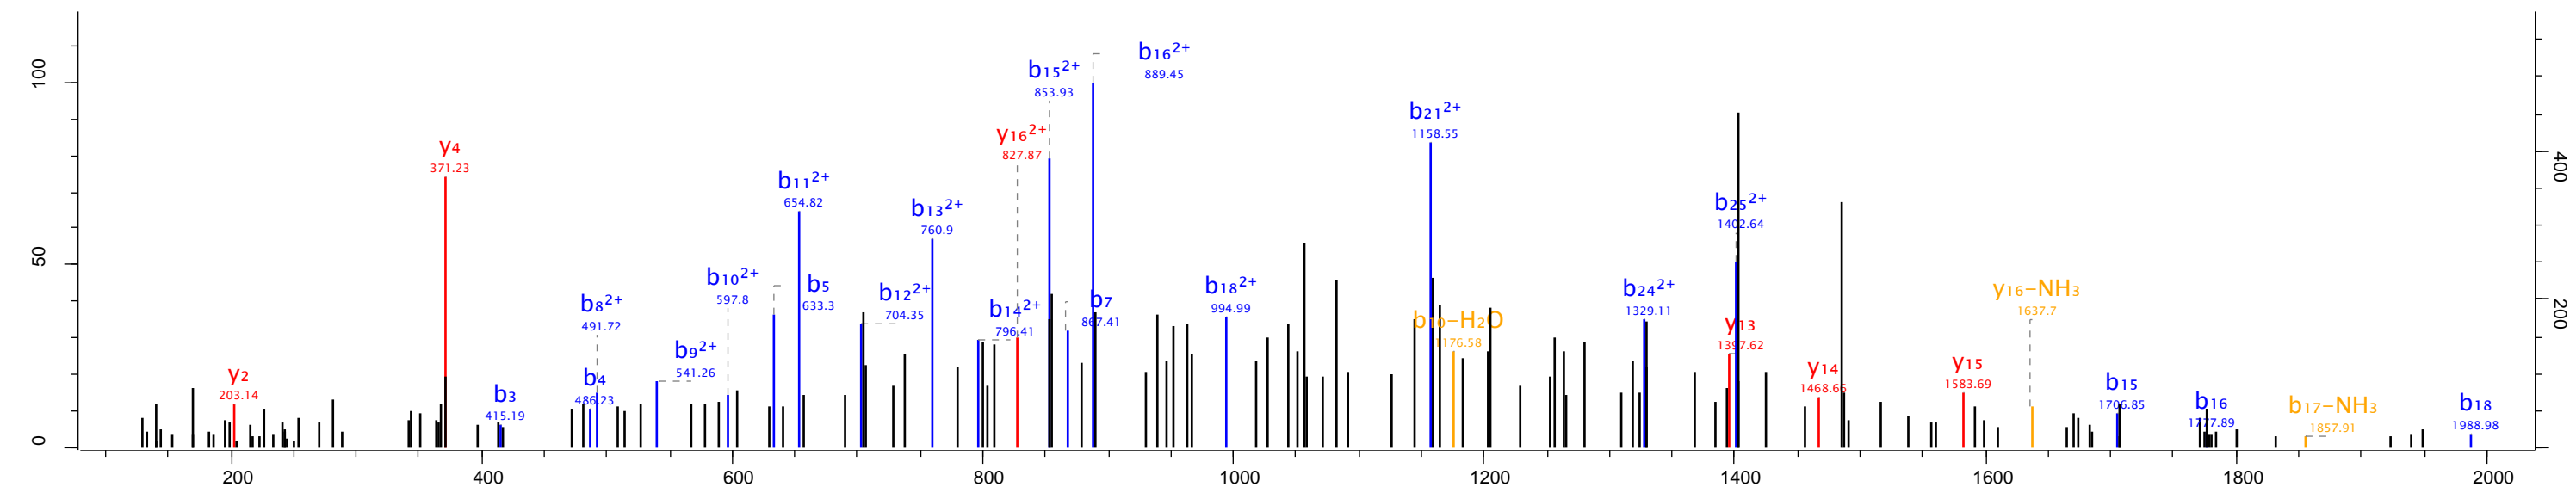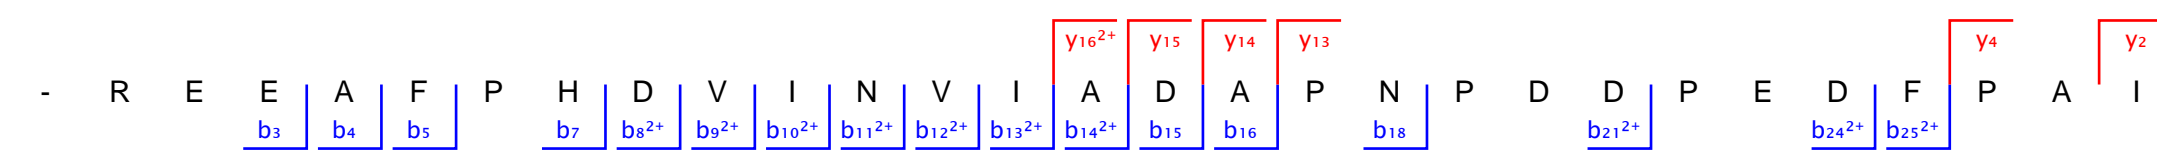

Raw file 2015-01-08\_CL04\_Blastomere-15  
 Scan 45625 Method ITMS; HCD Score 68.19 m/z 1059.17

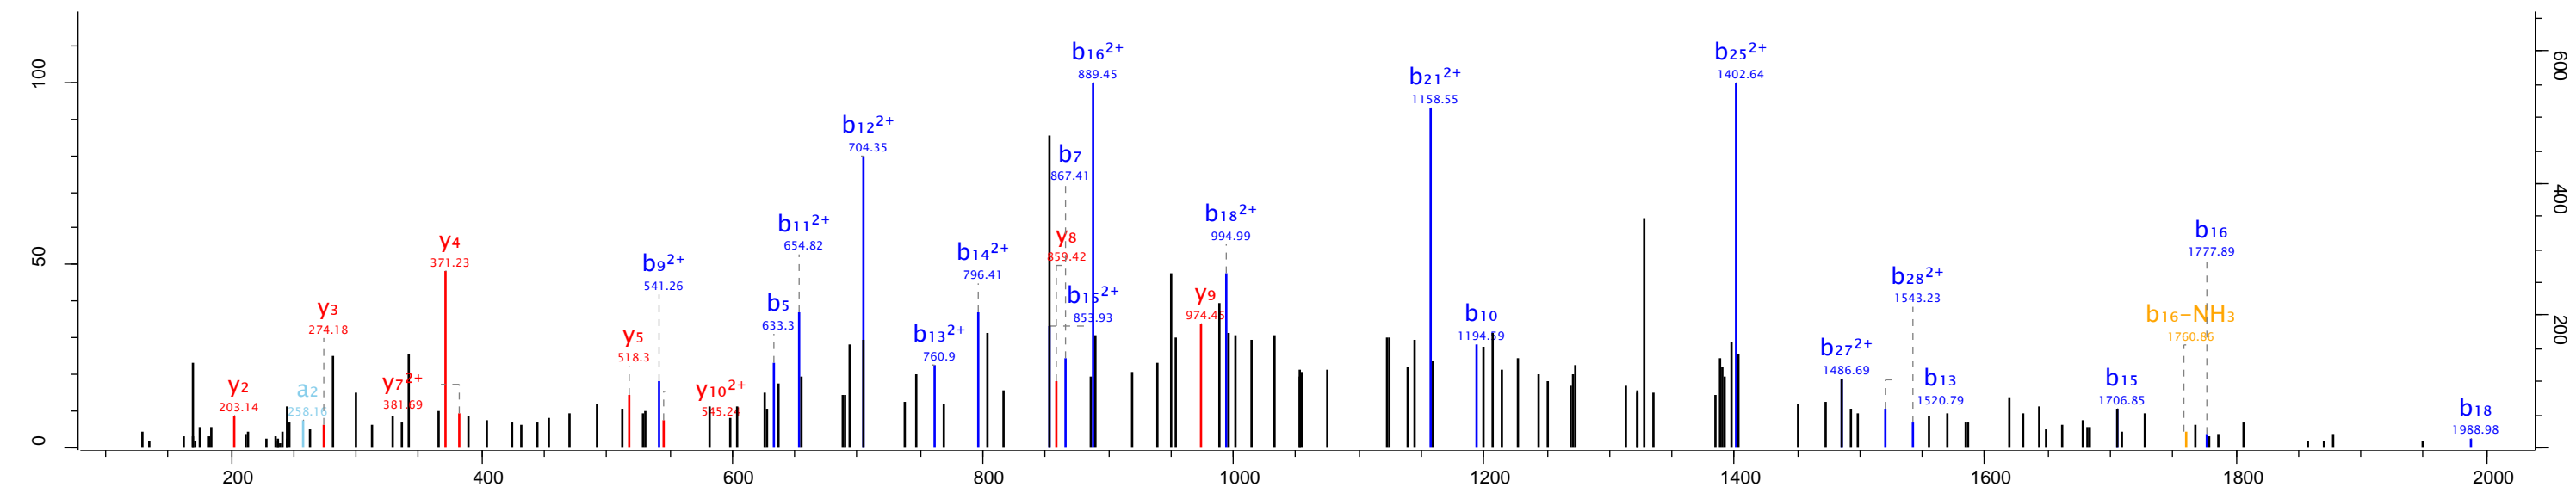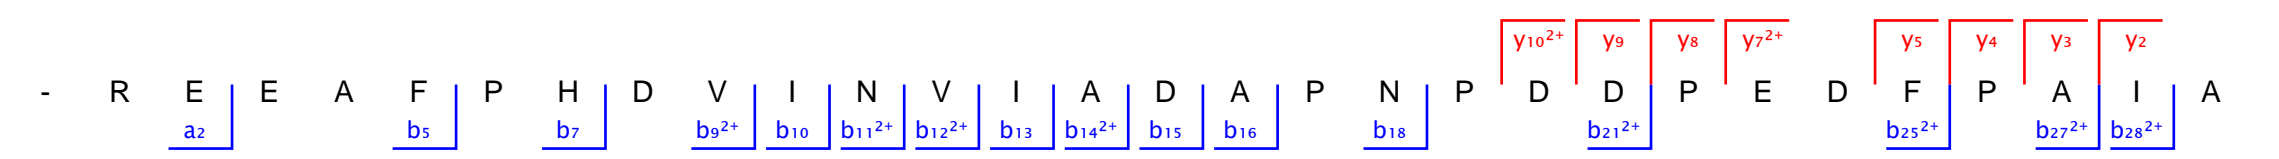

Spectral Annotation for Single-Peptide IDs between Single D11 Cells using Q-OT-LIT

Raw file  
 2015-01-08\_CL04\_Blastomere-15  
 Scan 45644 Method ITMS; HCD Score 31.61 m/z 1059.17

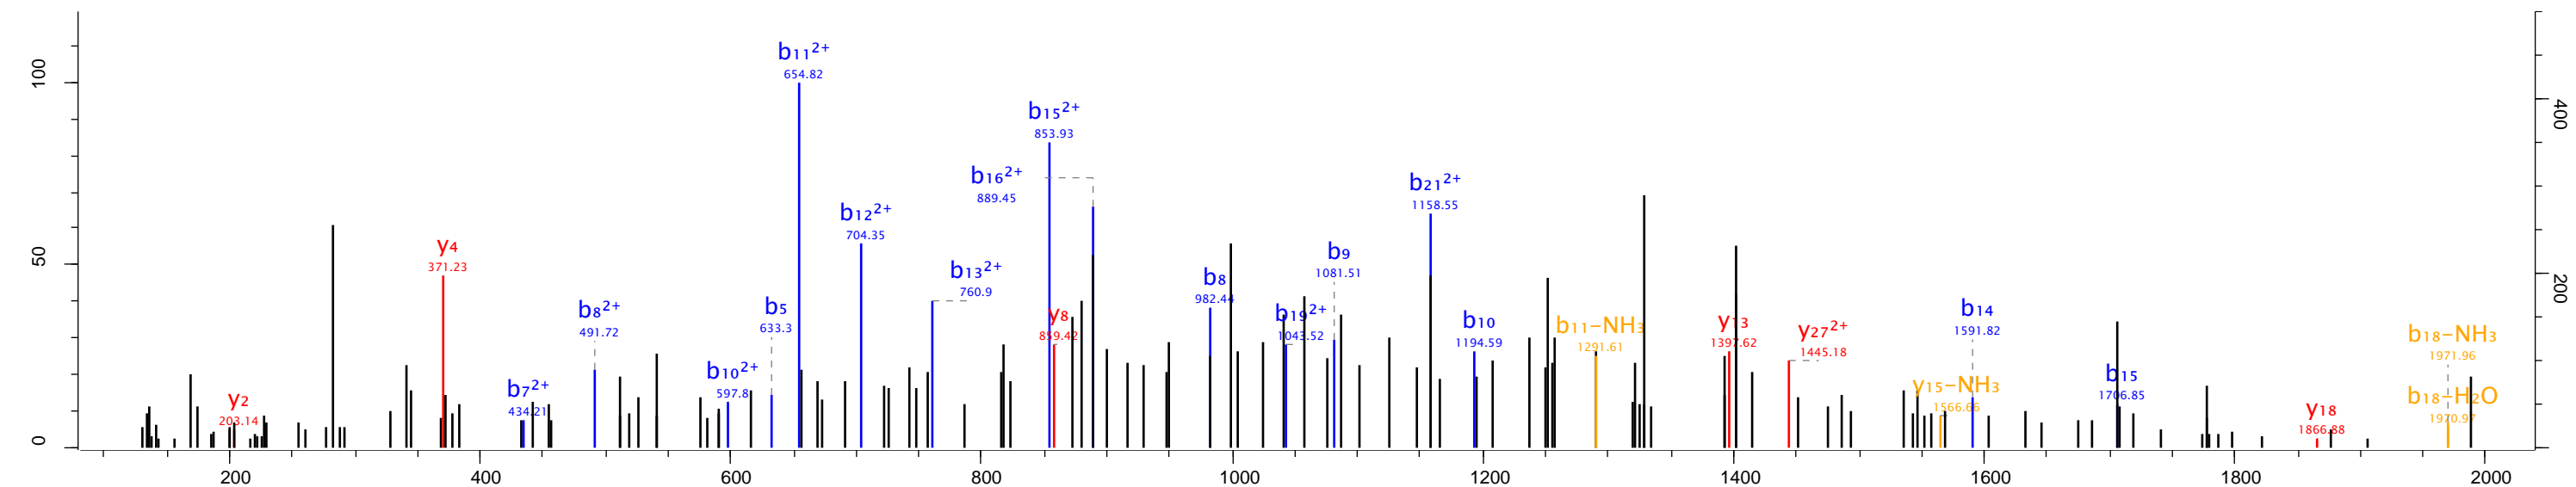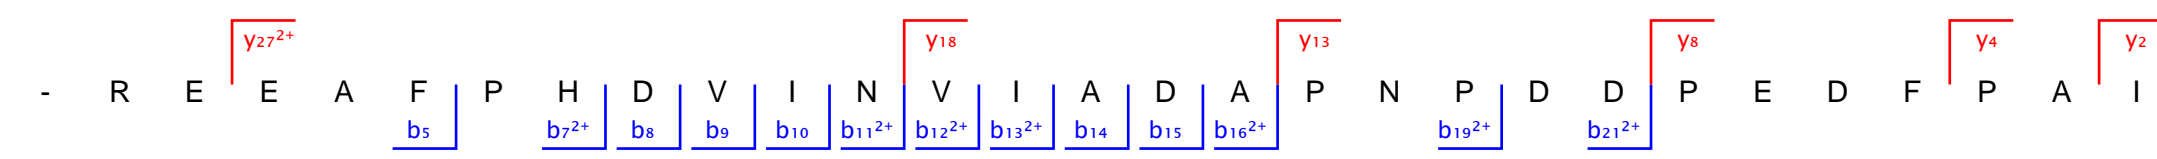

Spectral Annotation for Single-Peptide IDs between Single D11 Cells using Q-OT-LIT

2015-01-08\_CL04\_Blastomere-15

45733 ITMS; HCD 66.89 602.32

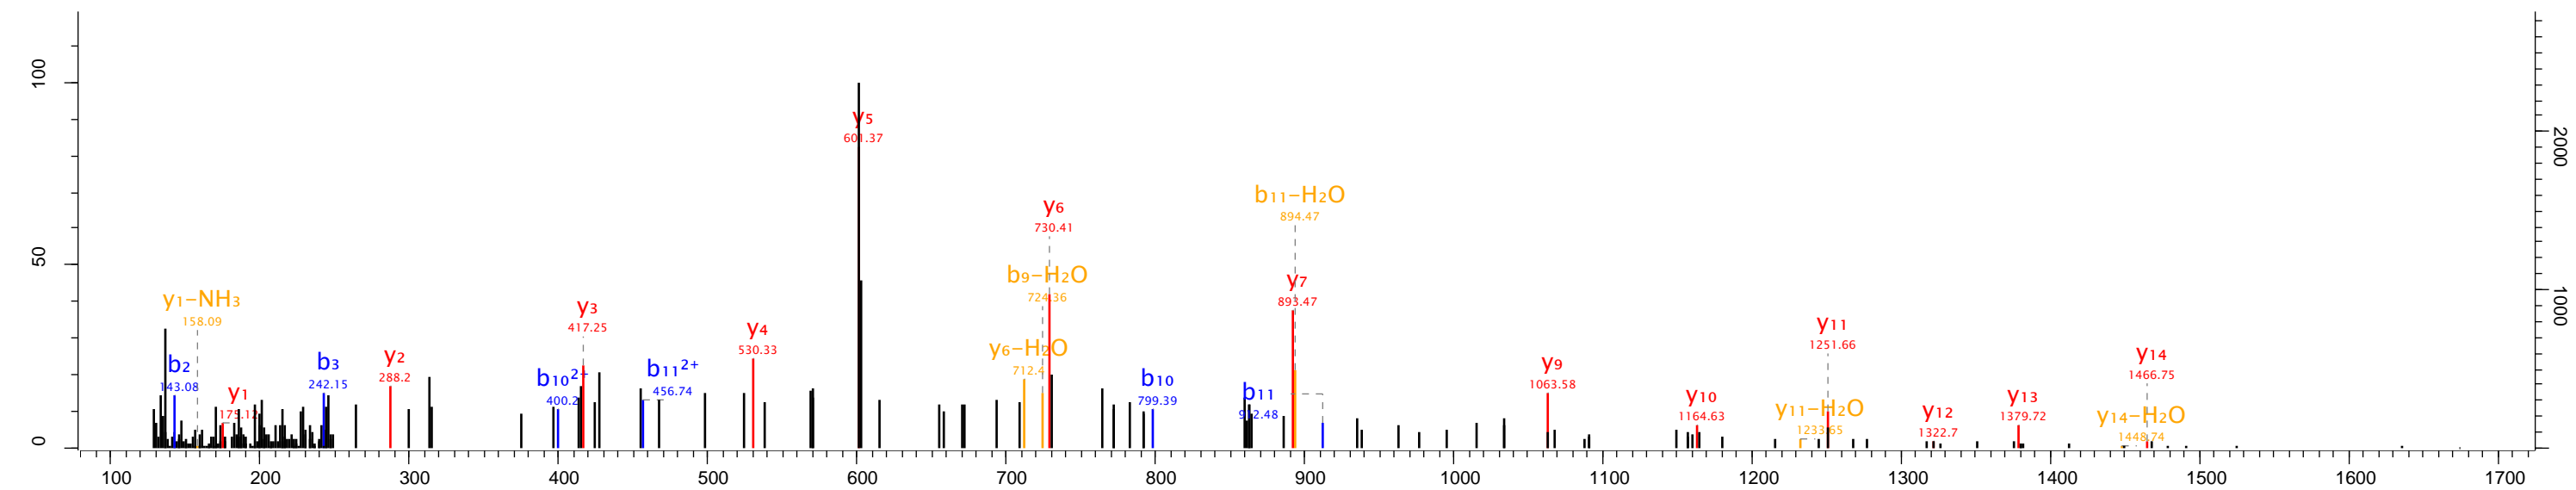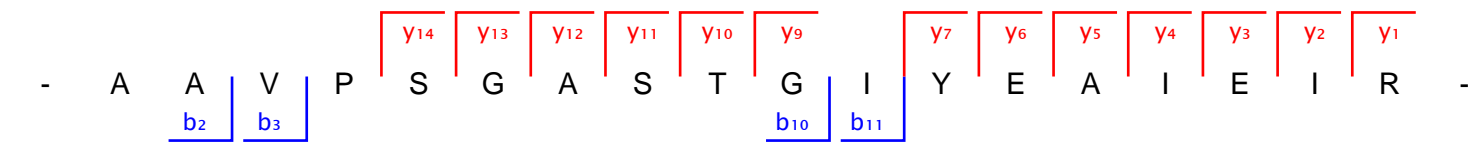

Raw file 2015-01-08\_CL04\_Blastomere-15 Scan 45884 Method ITMS; HCD Score 49.77 m/z 1063.84

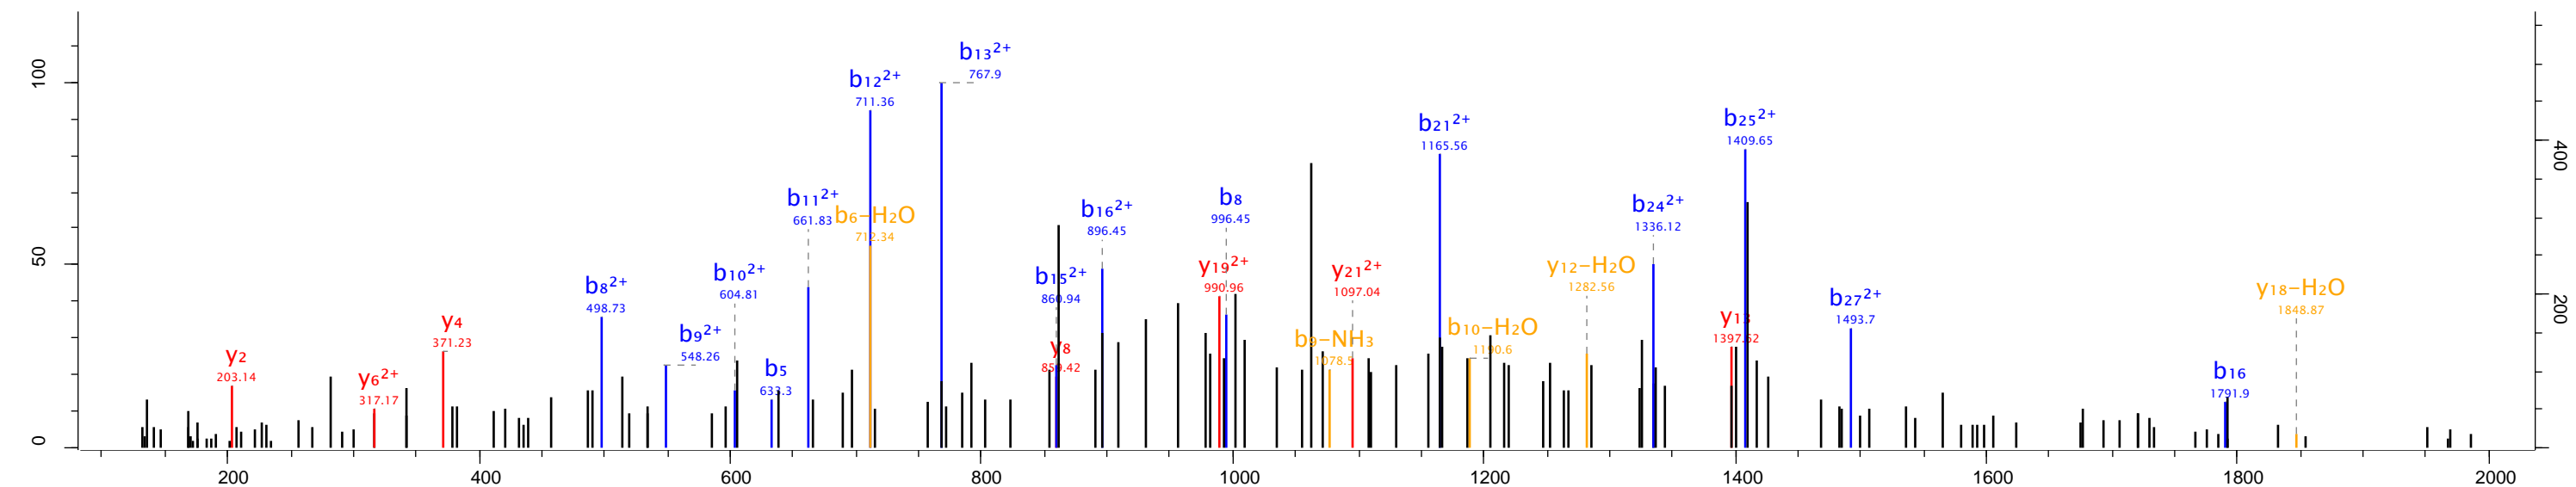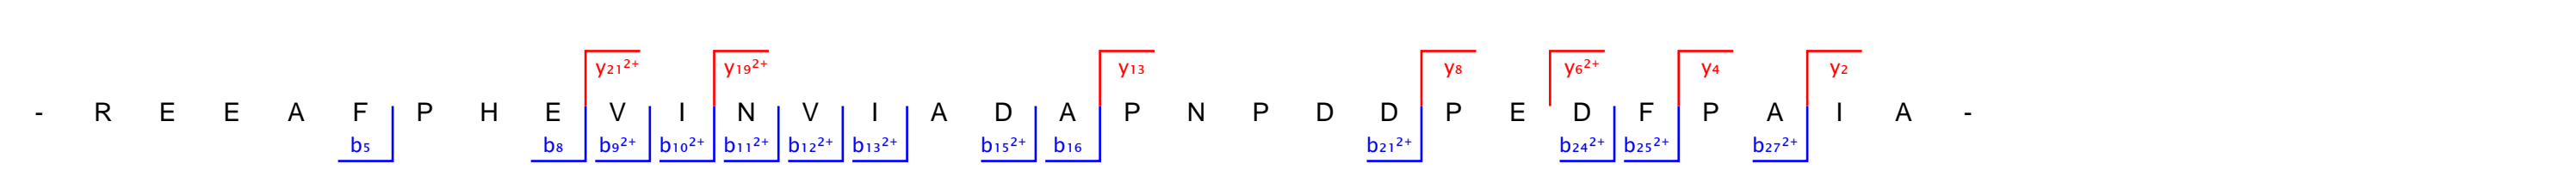

Spectral Annotation for Single-Peptide IDs between Single D11 Cells using Q-OT-LIT



Raw file: 2015-01-08\_CL04\_Blastomere-15  
 Scan: 45907 Method: ITMS; HCD Score: 39.58 m/z: 1064.17

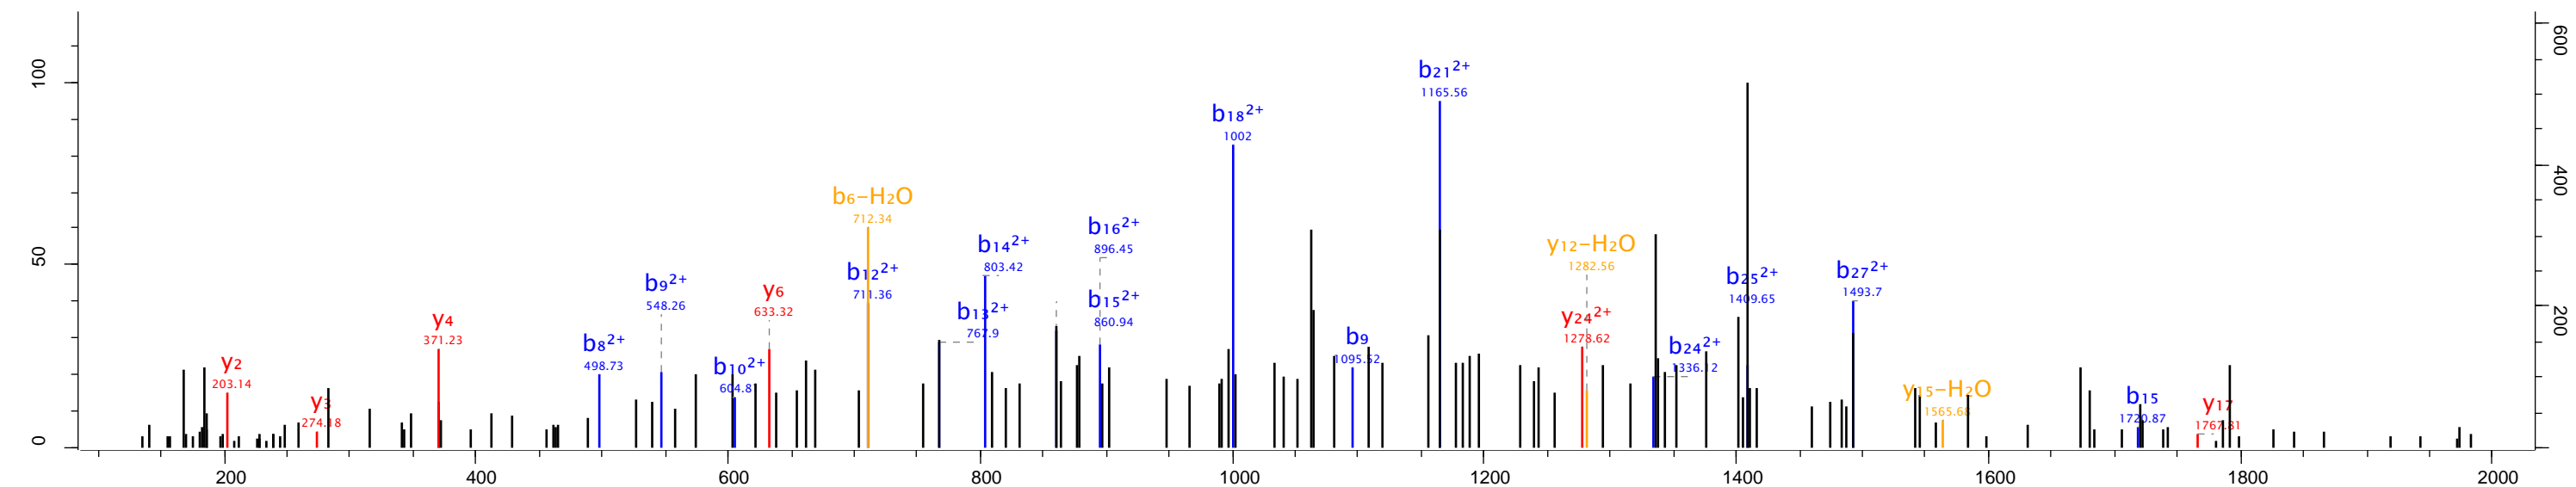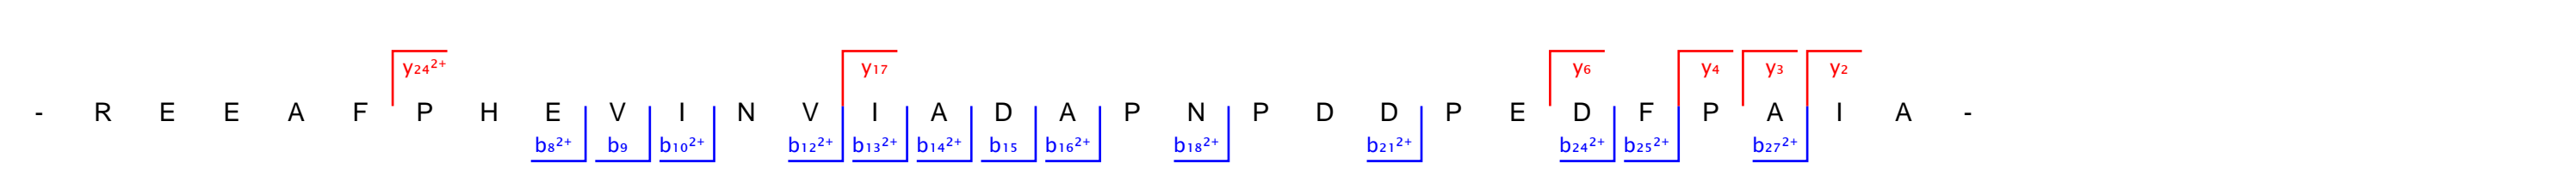

Spectral Annotation for Single-Peptide IDs between Single D11 Cells using Q-OT-LIT

Raw file 2015-01-08\_CL04\_Blastomere-15  
 Scan 45970 Method ITMS; HCD Score 42.17 m/z 1059.17

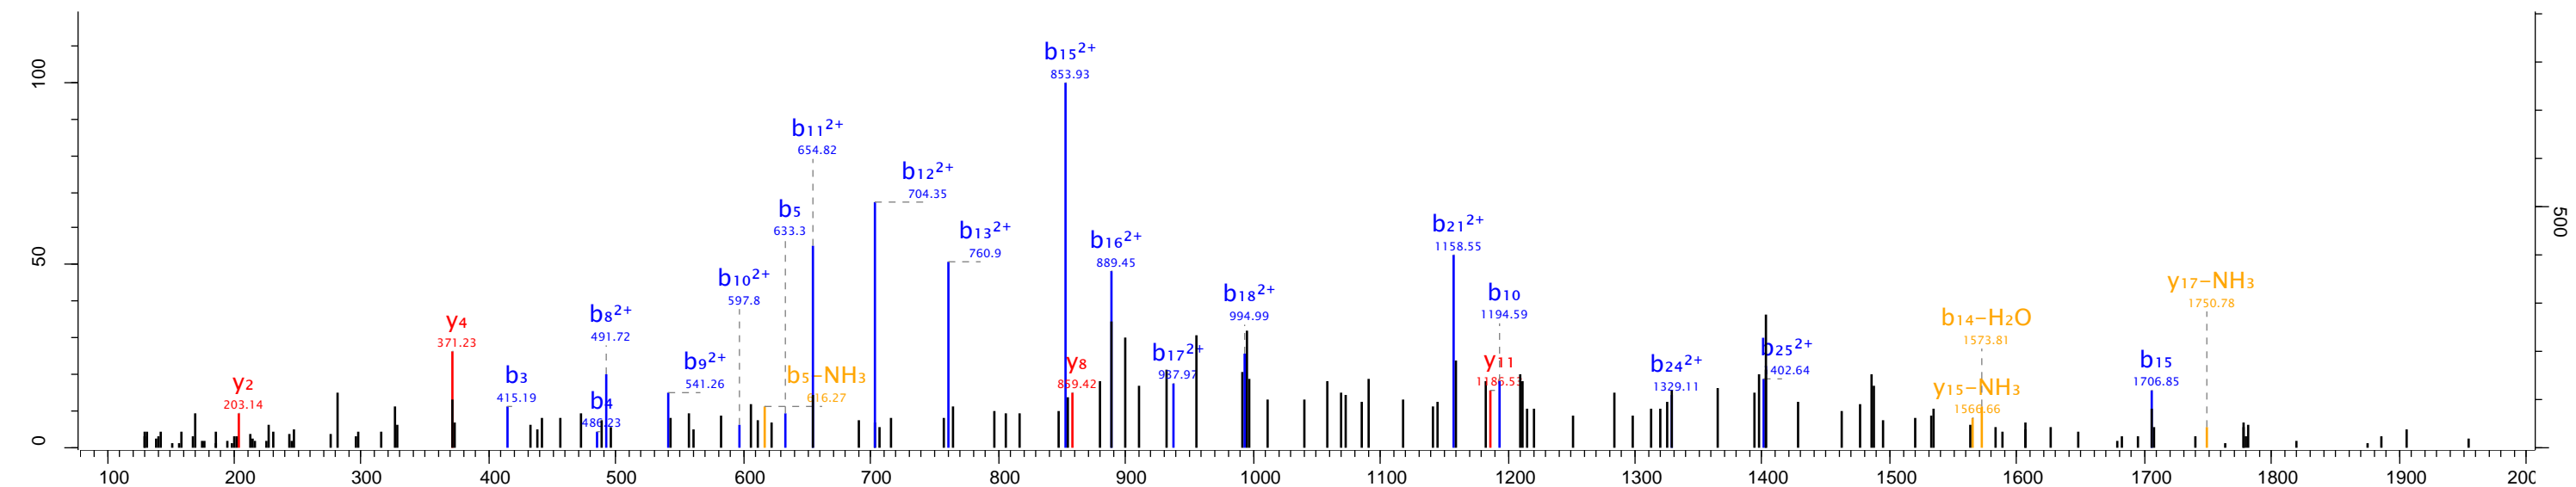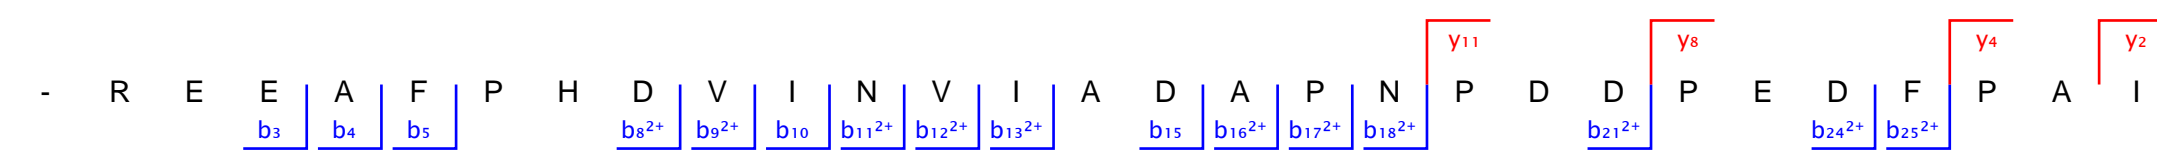

Raw file 2015-01-08\_CL04\_Blastomere-15  
 Scan 46143 Method ITMS; HCD Score 24.63 m/z 1059.17

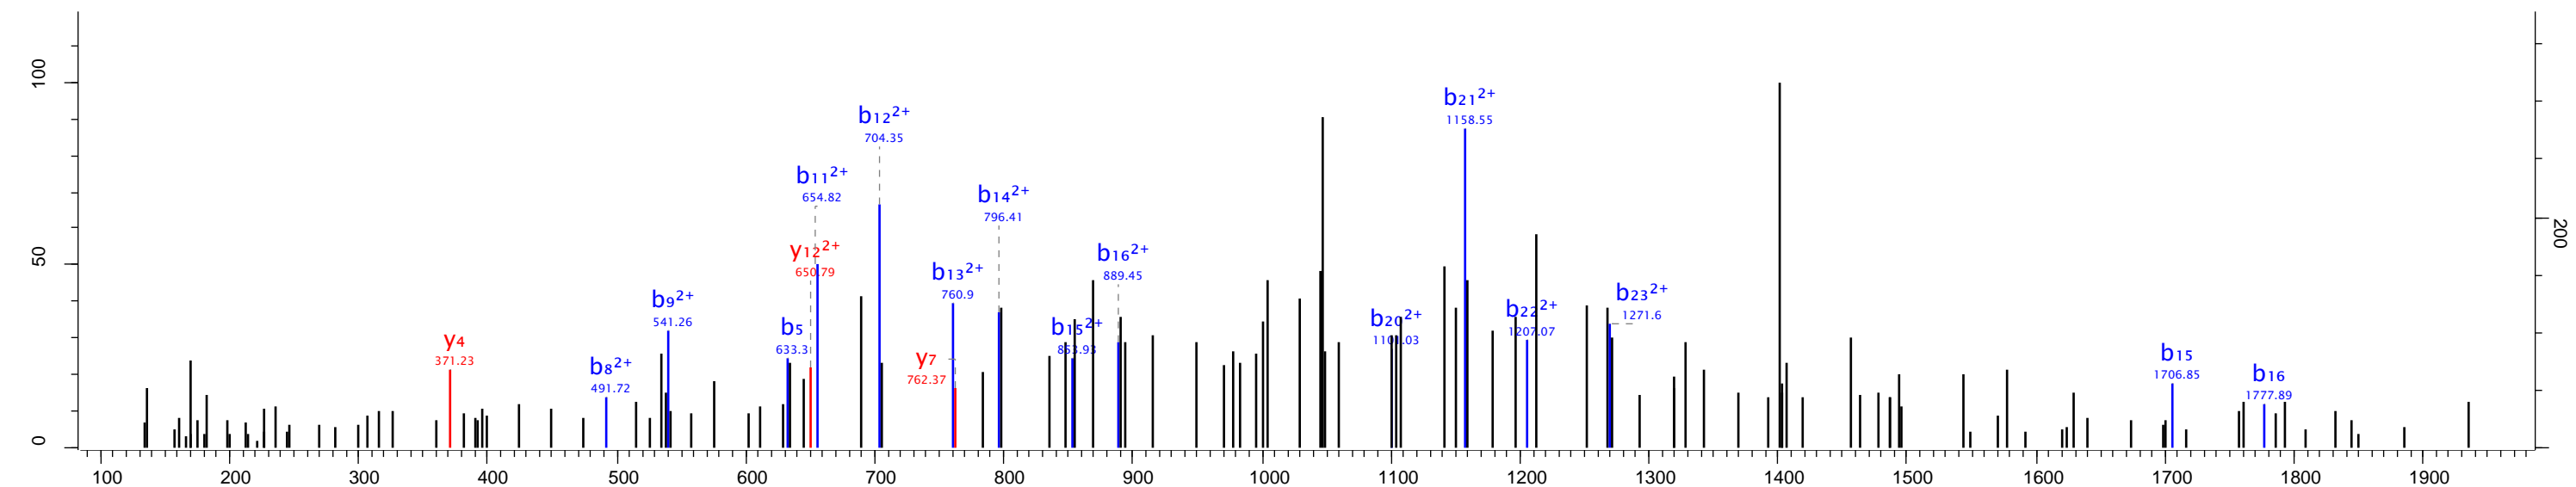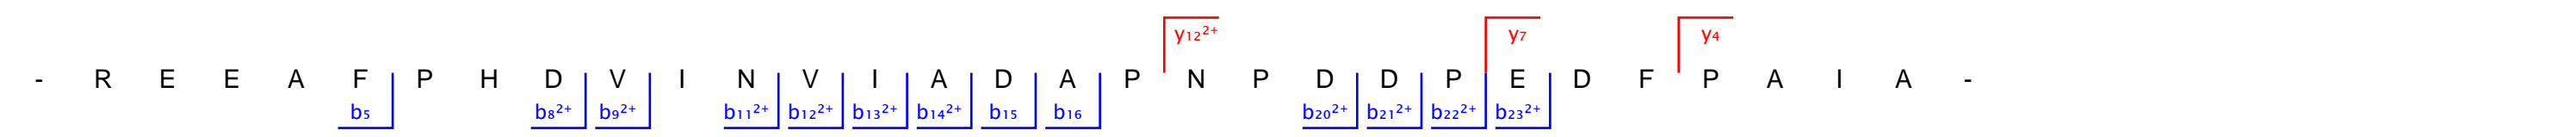

Raw file 2015-01-08\_CL04\_Blastomere-15  
 Scan 46164 Method ITMS; HCD Score 32.78 m/z 1059.17

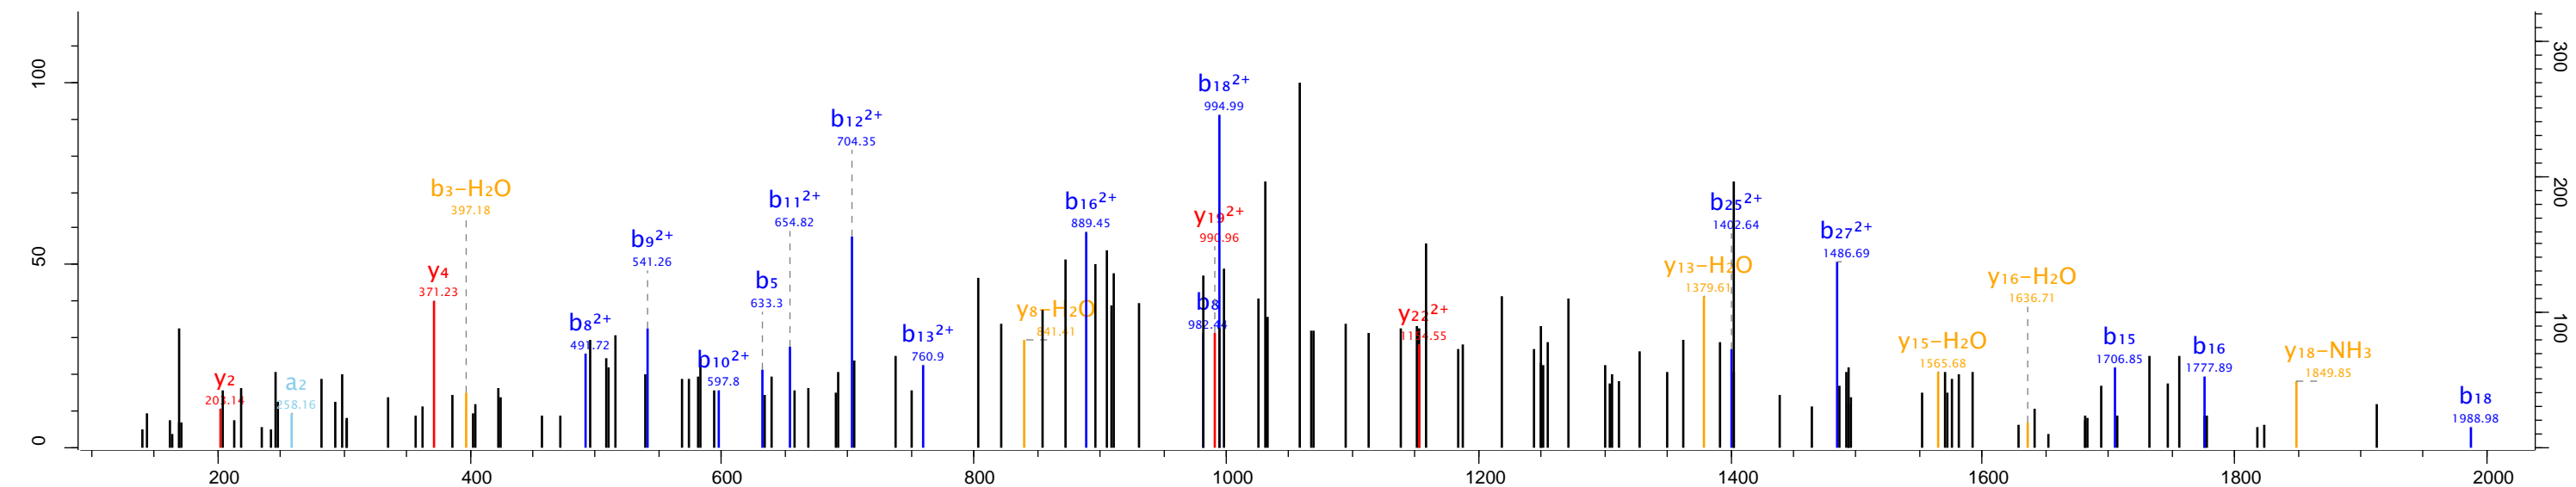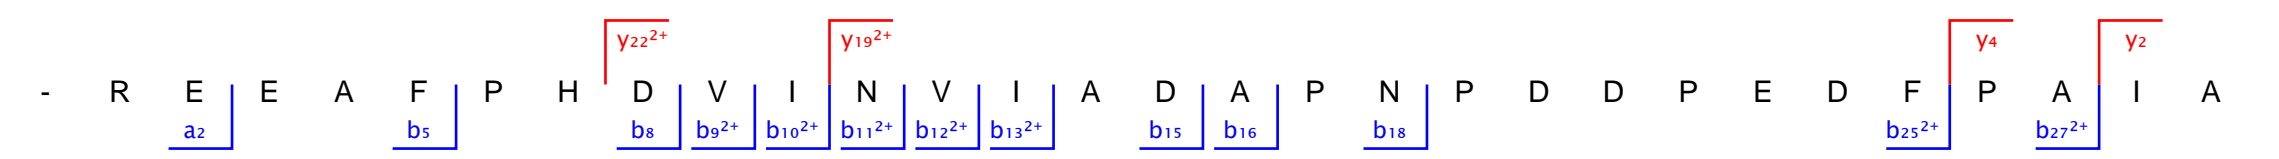

Spectral Annotation for Single-Peptide IDs between Single D11 Cells using Q-OT-LIT

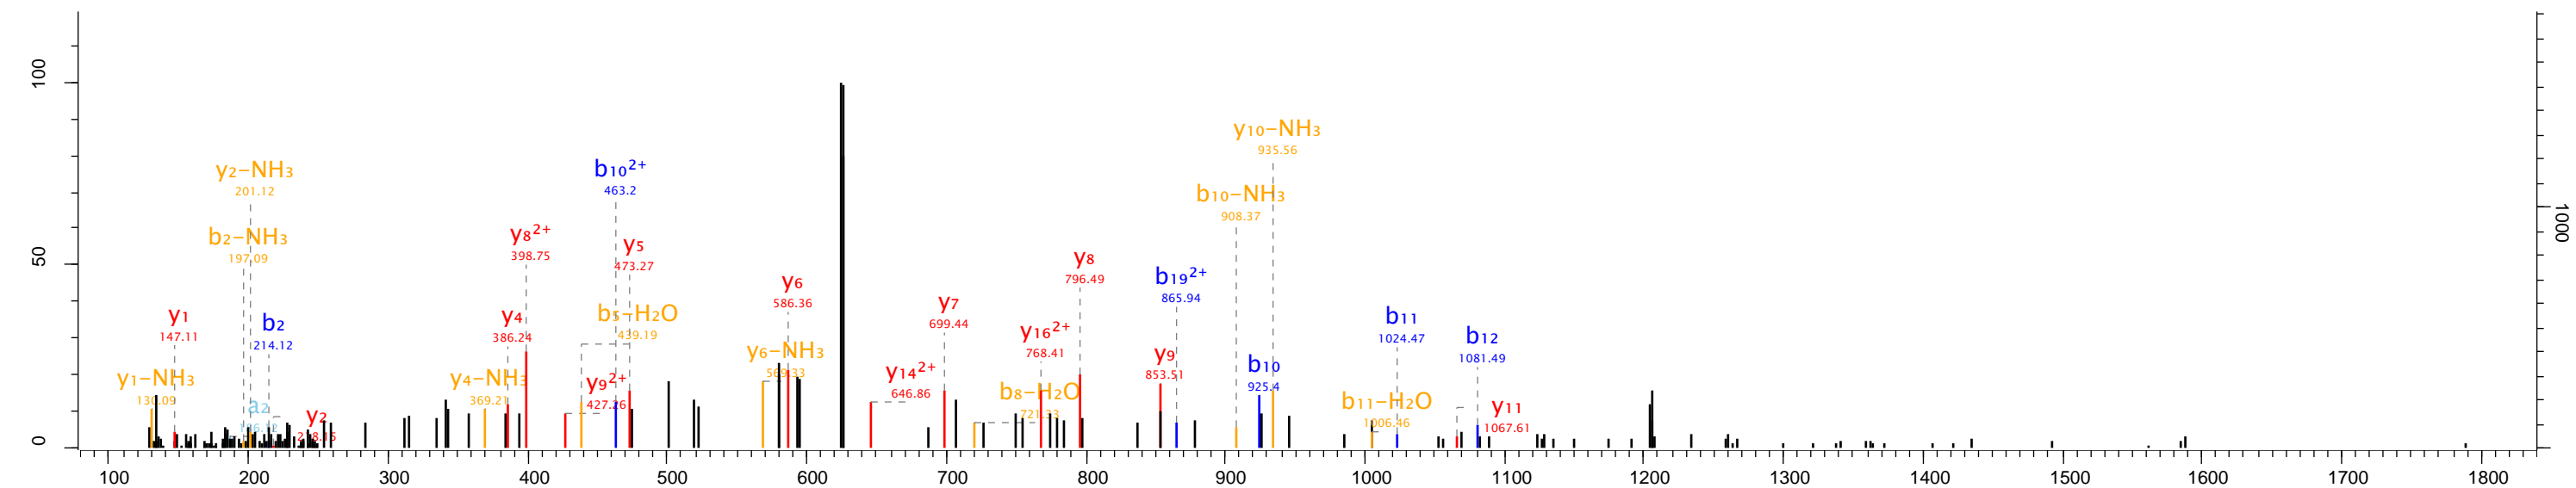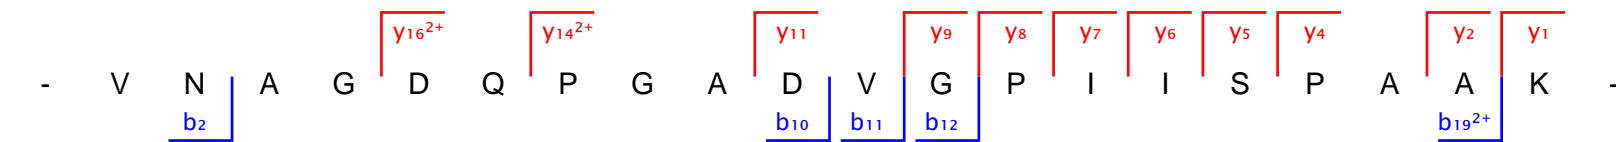

Raw file 2015-01-08\_CL04\_Blastomere-15 Scan 47711 Method ITMS; HCD Score 44.73 m/z 689.99

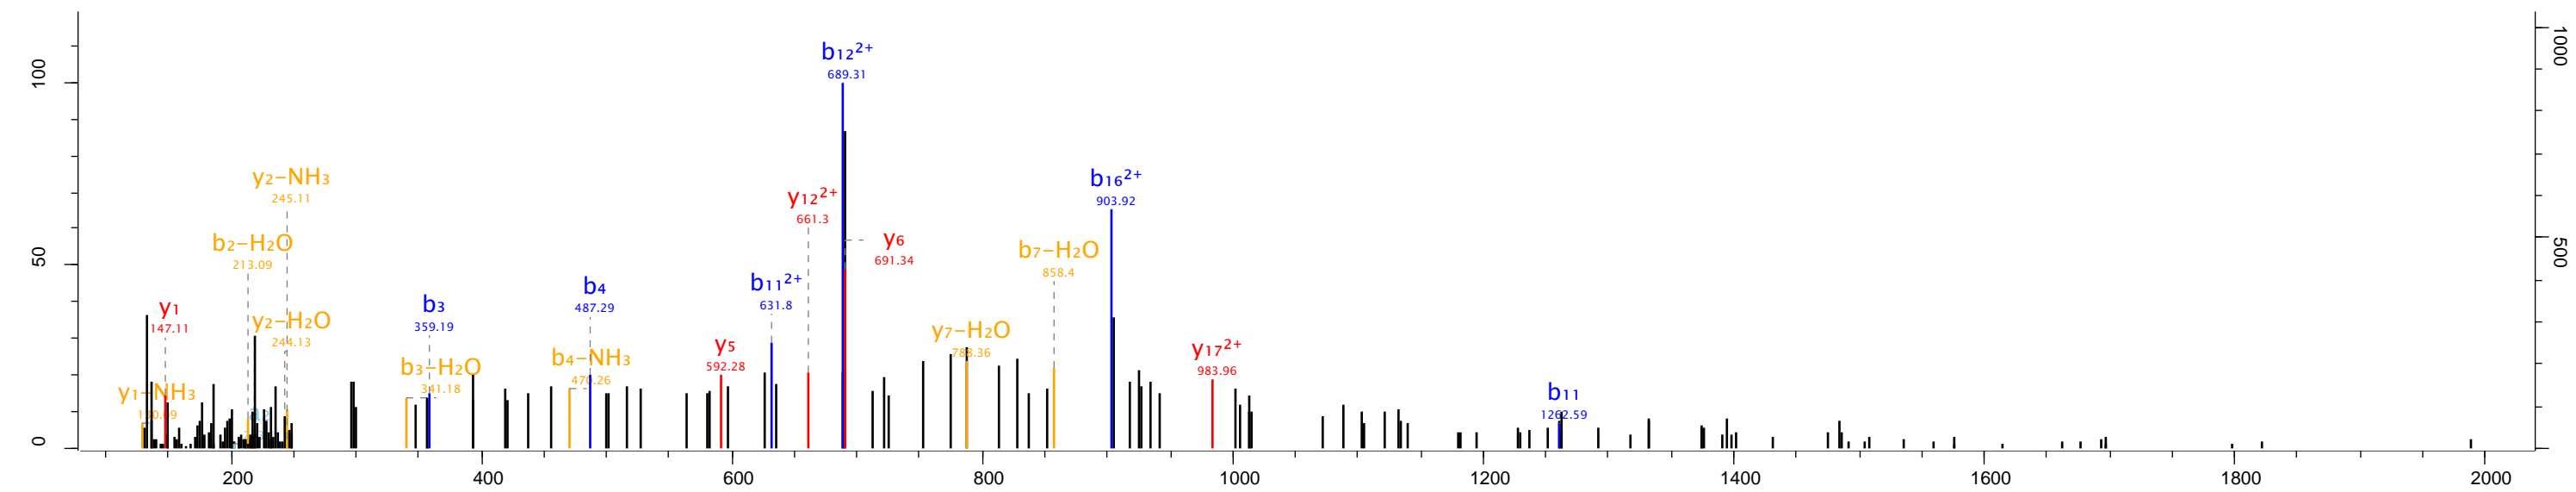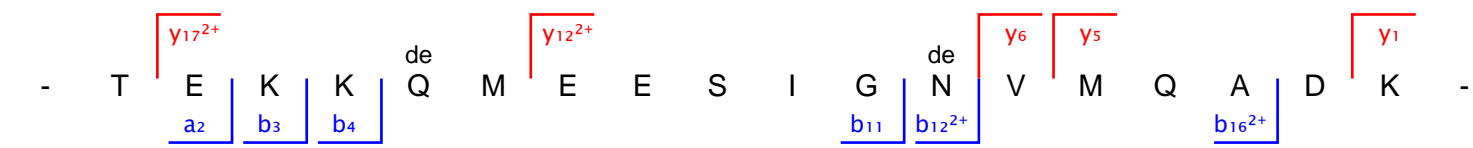

Spectral Annotation for Single-Peptide IDs between Single D11 Cells using Q-OT-LIT

Raw file 2015-01-08\_CL04\_Blastomere-15 Scan 48025 Method ITMS; HCD Score 68.09 m/z 679.02

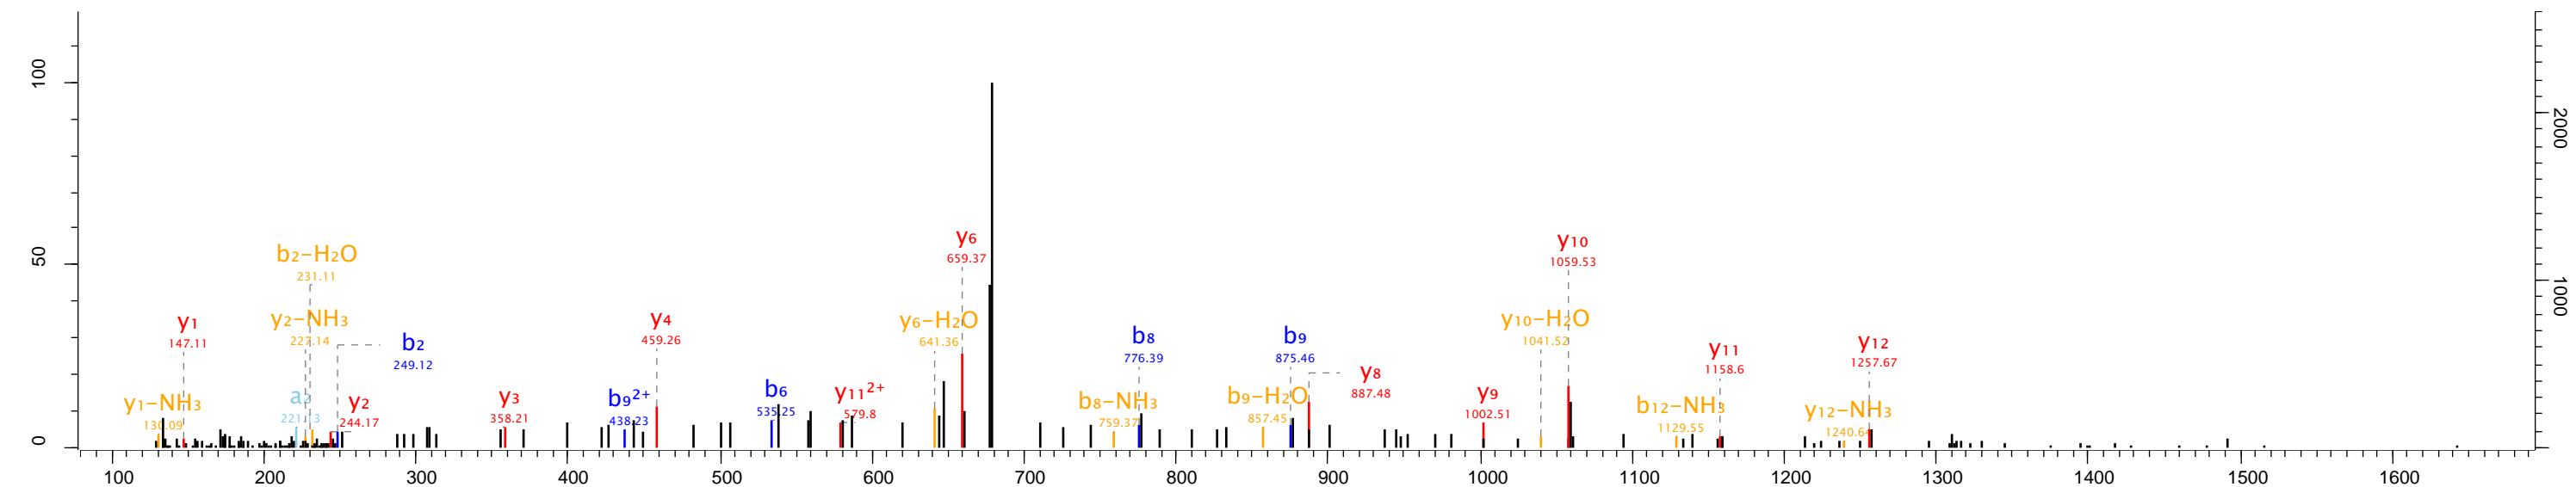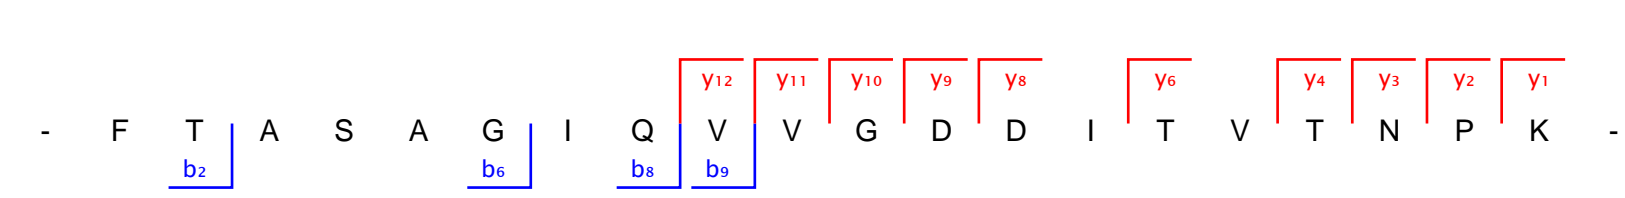

Spectral Annotation for Single-Peptide IDs between Single D11 Cells using Q-OT-LIT

Raw file 2015-01-08\_CL04\_Blastomere-15 Scan 48064 Method ITMS; HCD Score 74.03 m/z 678.69

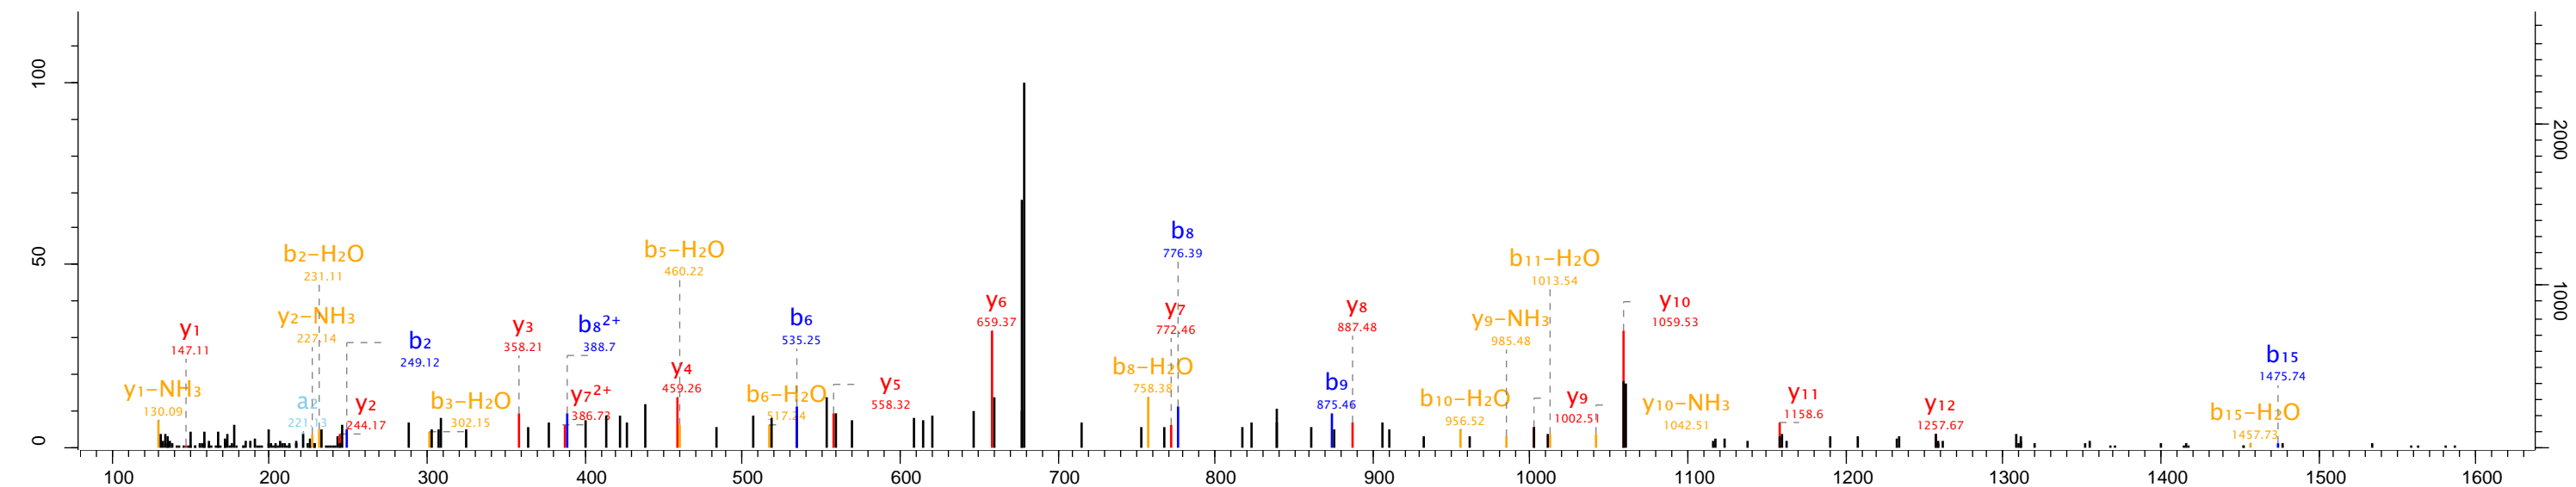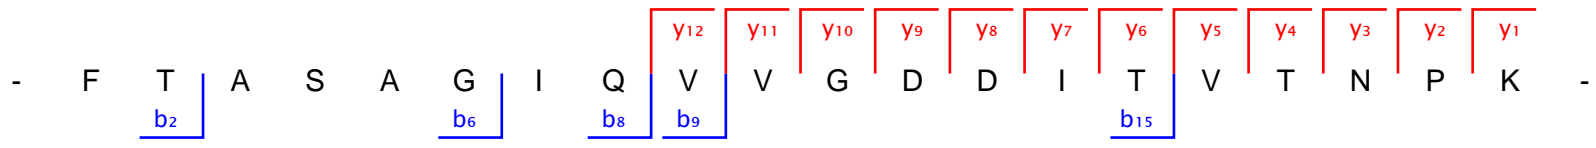

Spectral Annotation for Single-Peptide IDs between Single D11 Cells using Q-OT-LIT



Raw file 2015-01-08\_CL04\_Blastomere-15 Scan 48190 Method ITMS; HCD Score 76.53 m/z 705.05

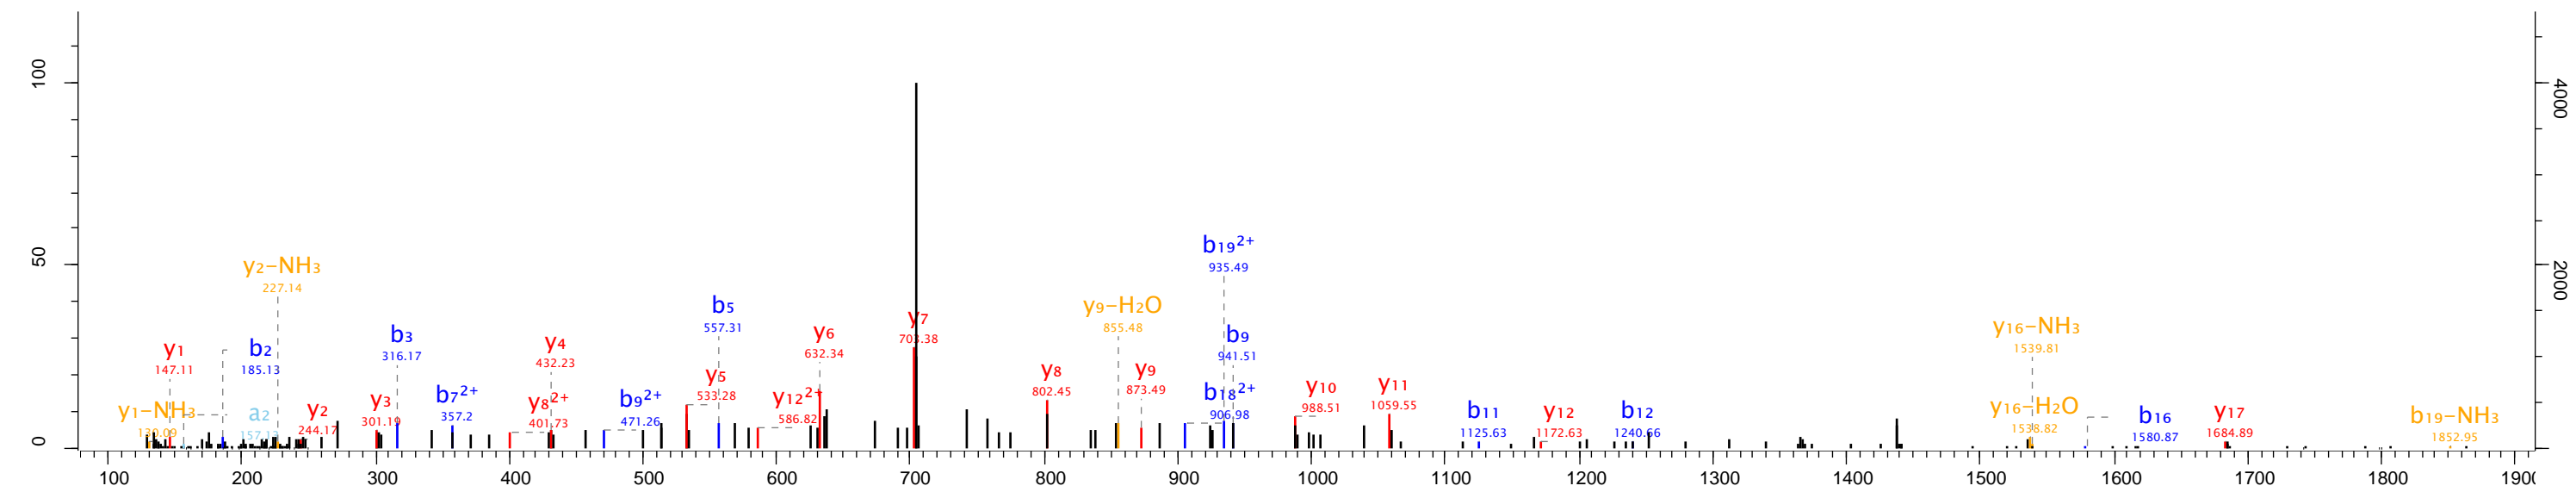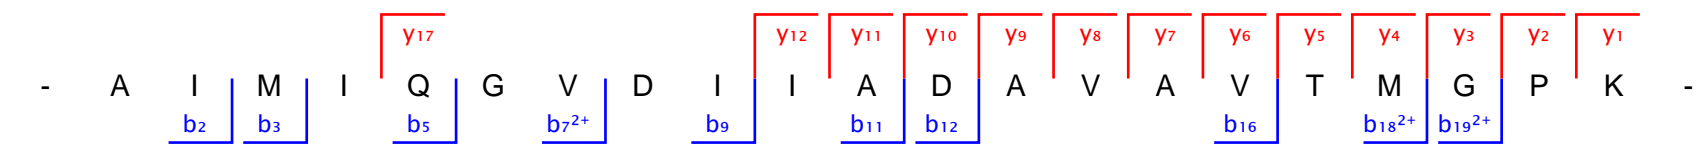

Spectral Annotation for Single-Peptide IDs between Single D11 Cells using Q-OT-LIT

Raw file: 2015-01-08\_CL04\_Blastomere-15  
 Scan: 48205 Method: ITMS; HCD Score: 60.33 m/z: 1017.53

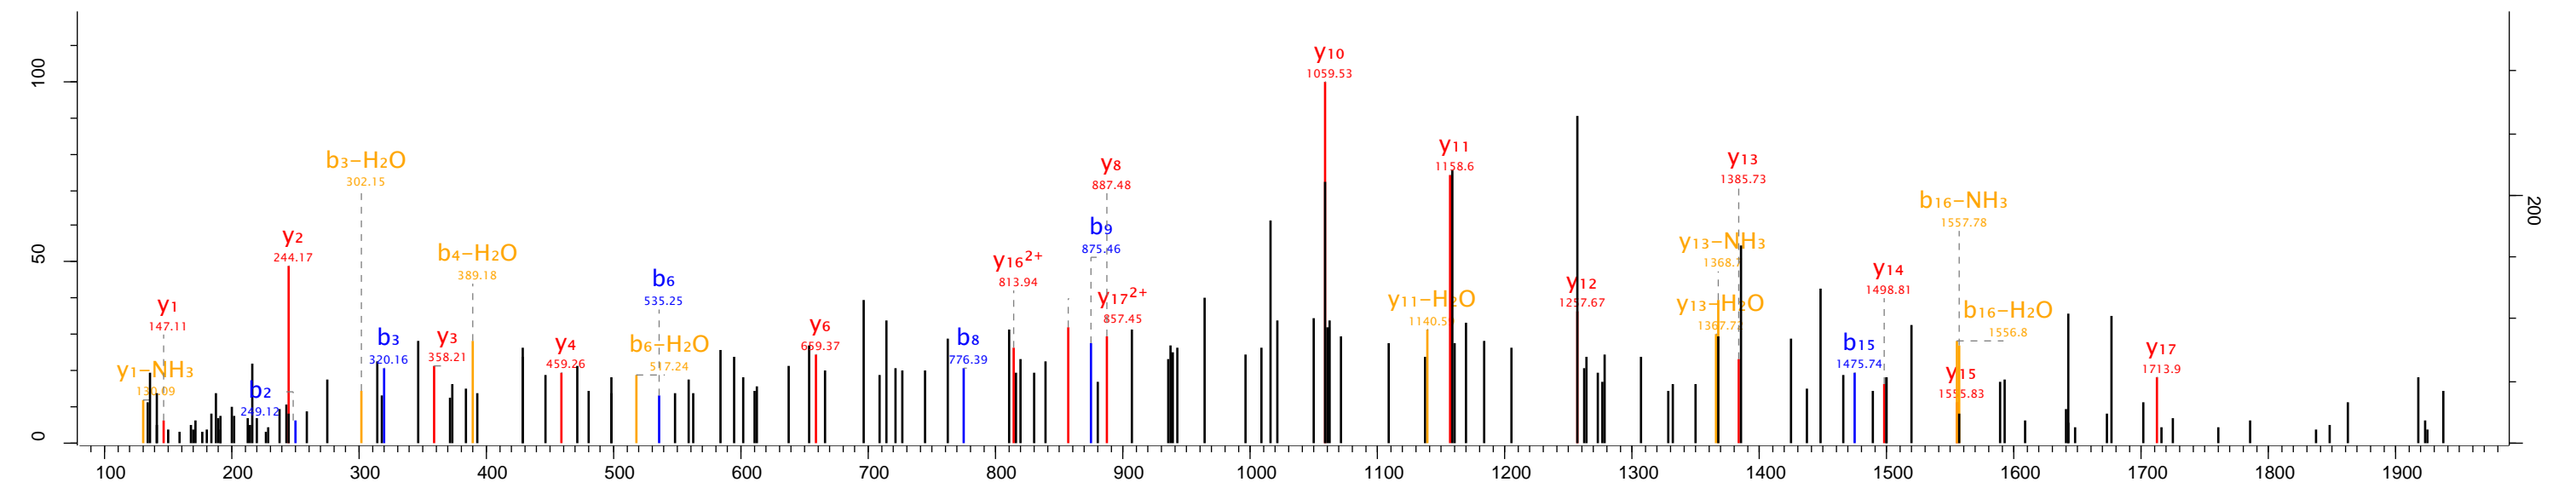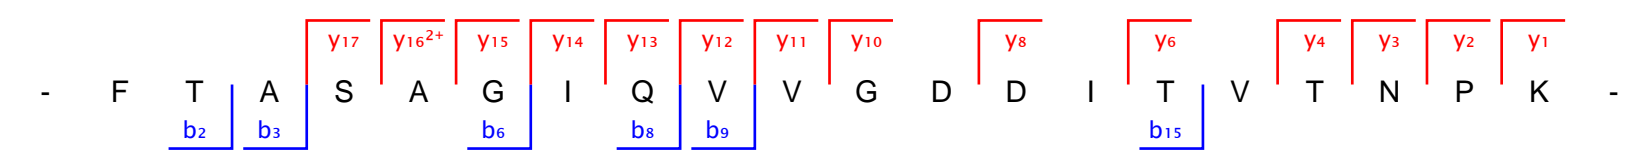

Spectral Annotation for Single-Peptide IDs between Single D11 Cells using Q-OT-LIT

Raw file 2015-01-08\_CL04\_Blastomere-15 Scan 48323 Method ITMS; HCD Score 87.36 m/z 678.69

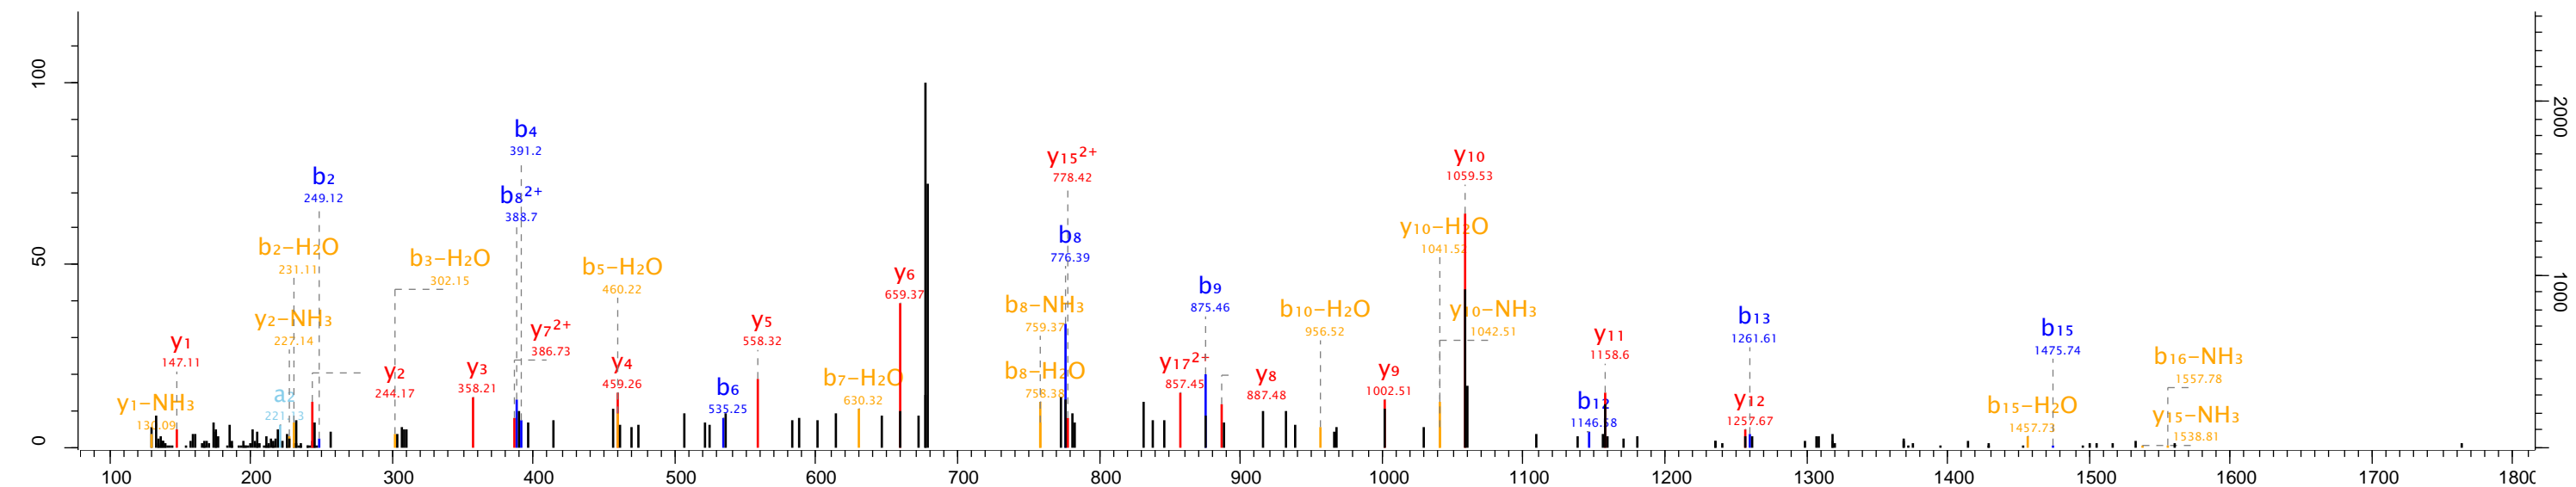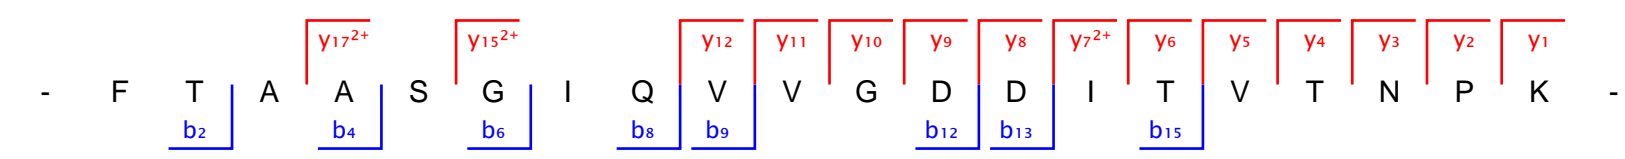

Spectral Annotation for Single-Peptide IDs between Single D11 Cells using Q-OT-LIT

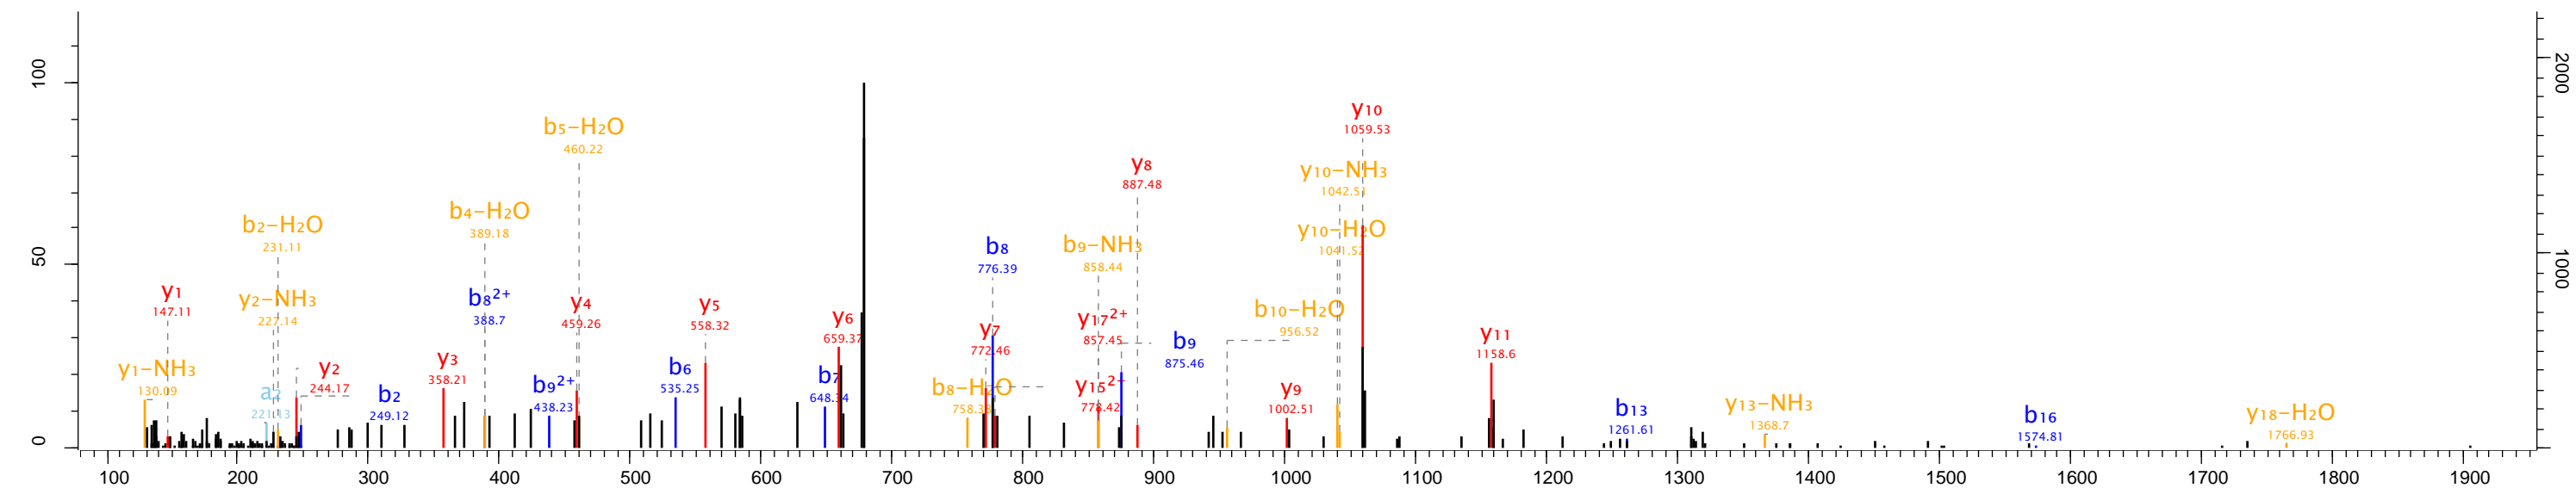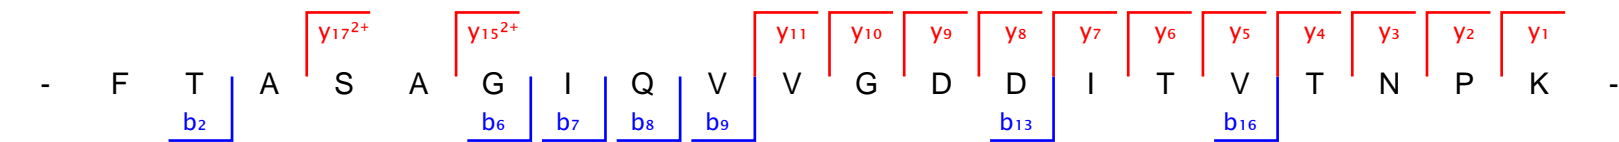

Raw file 2015-01-08\_CL04\_Blastomere-15 Scan 48433 Method ITMS; HCD Score 54.86 m/z 678.69

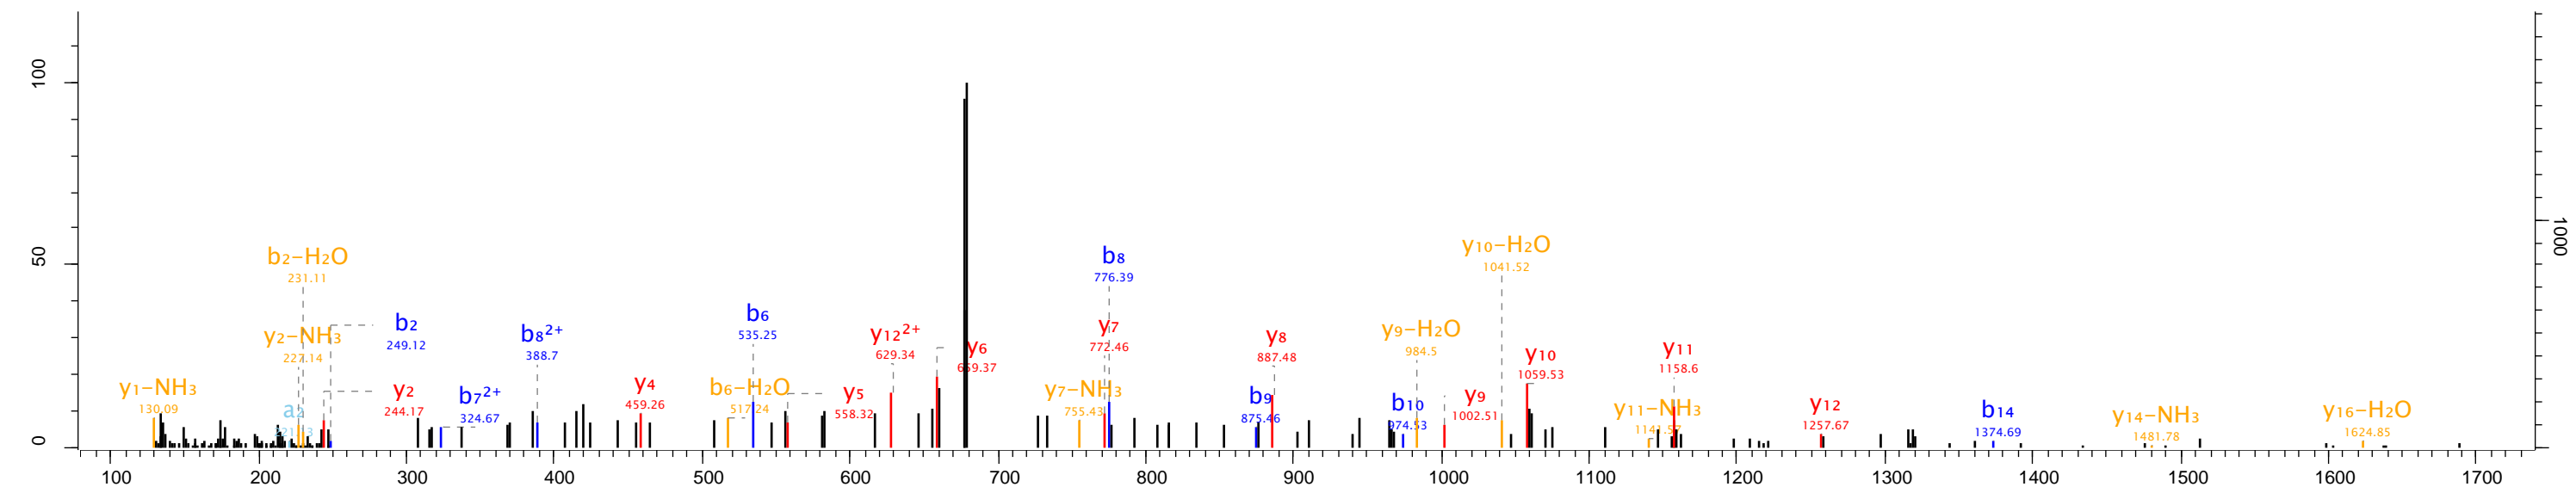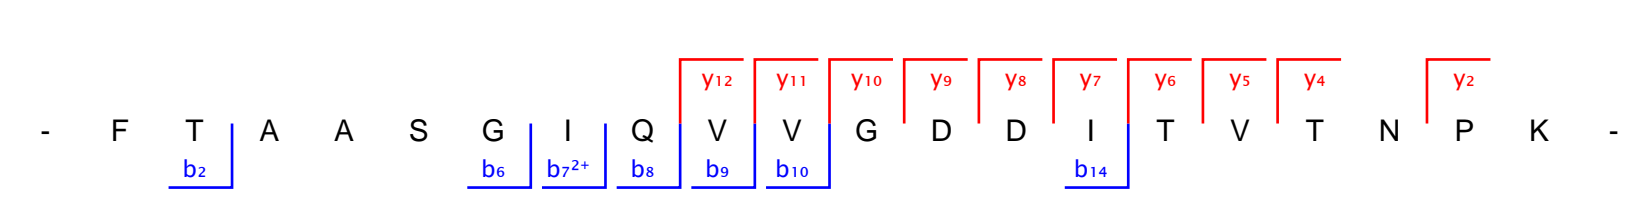

Spectral Annotation for Single-Peptide IDs between Single D11 Cells using Q-OT-LIT

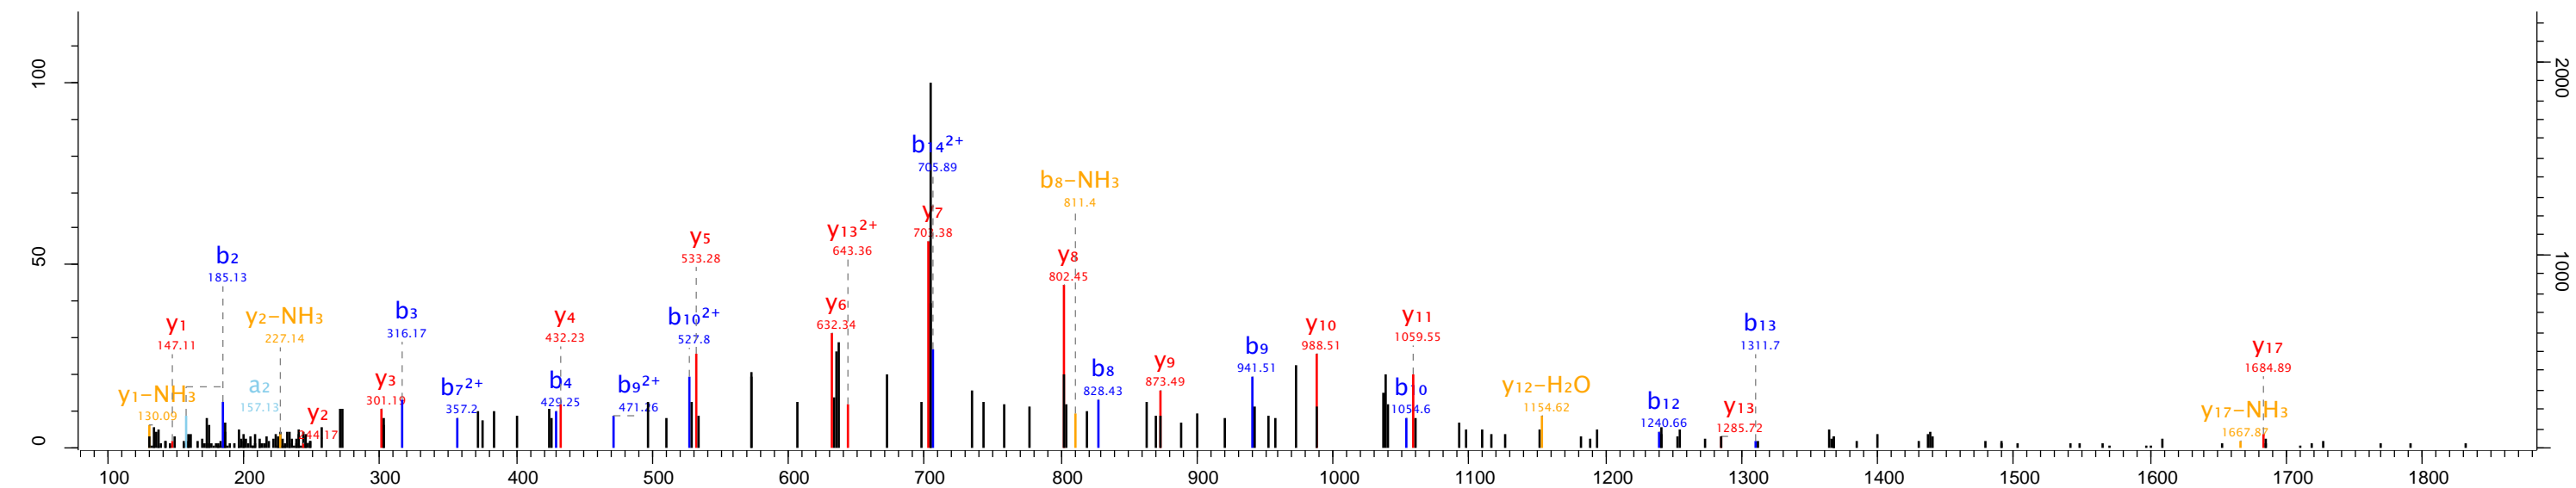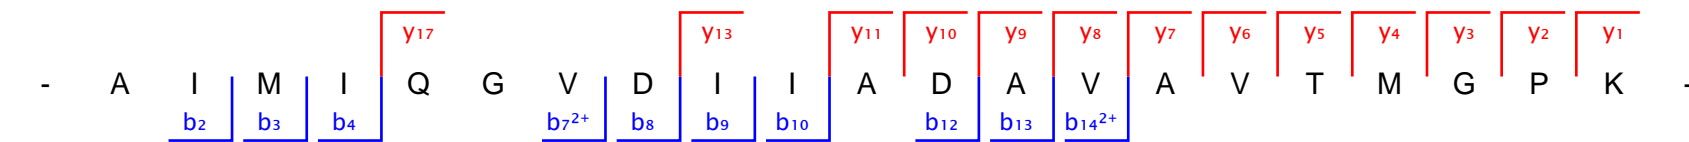

Raw file 2015-01-08\_CL04\_Blastomere-15 Scan 48465 Method ITMS; HCD Score 56.12 m/z 638.99

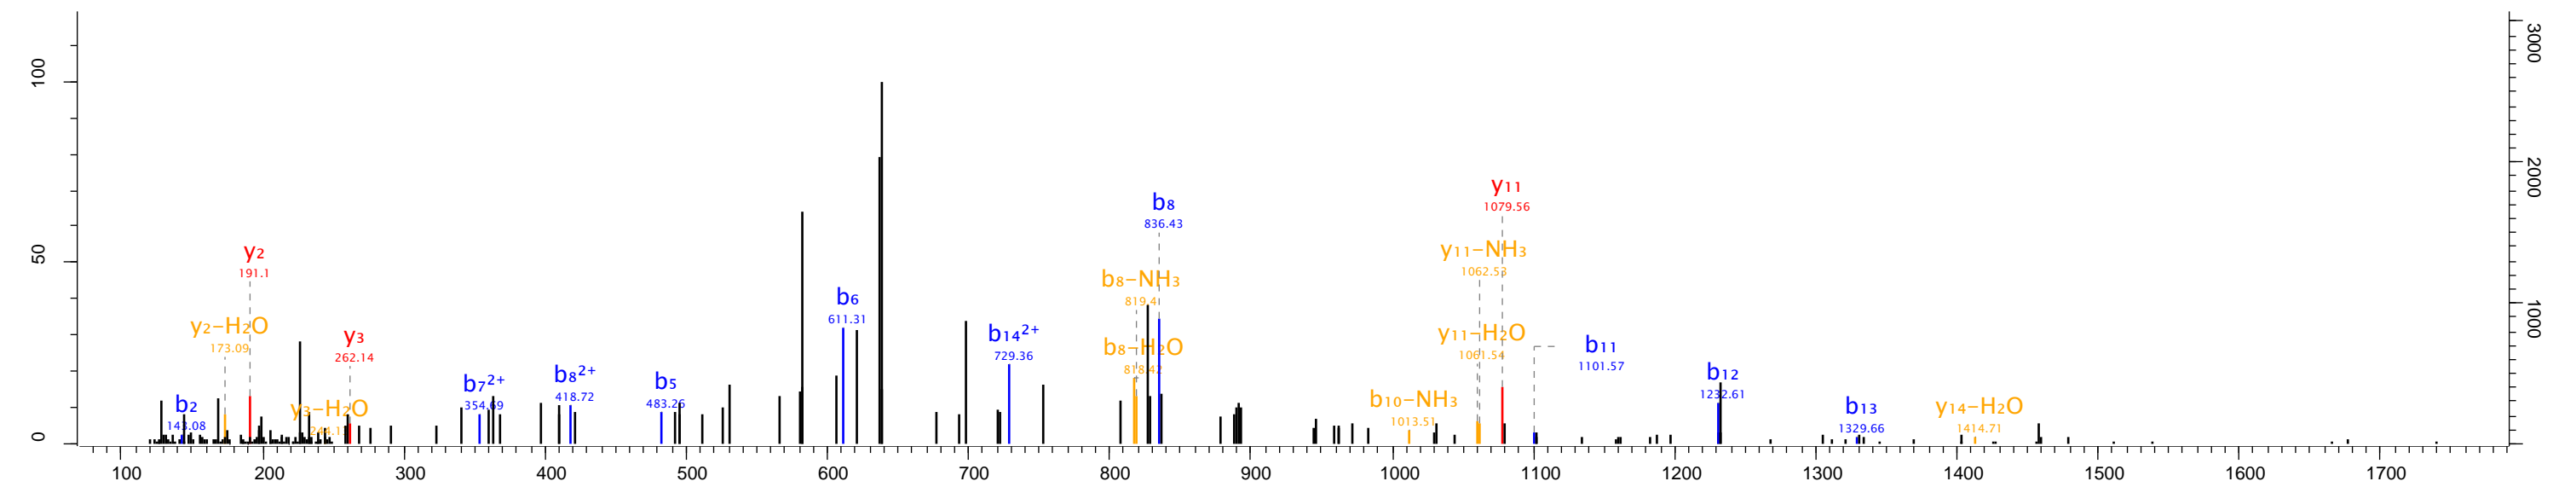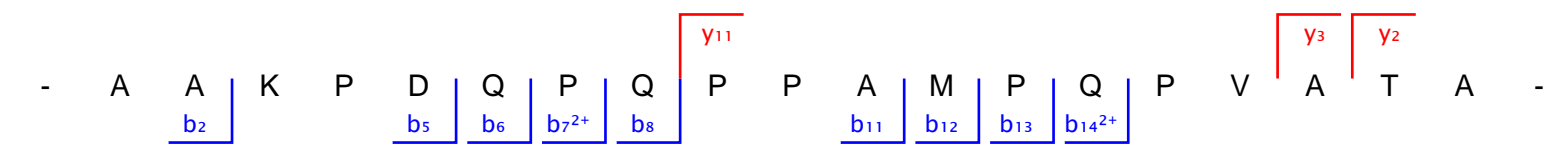

Spectral Annotation for Single-Peptide IDs between Single D11 Cells using Q-OT-LIT

Raw file 2015-01-08\_CL04\_Blastomere-15 Scan 48910 Method ITMS; HCD Score 67.4 m/z 678.69

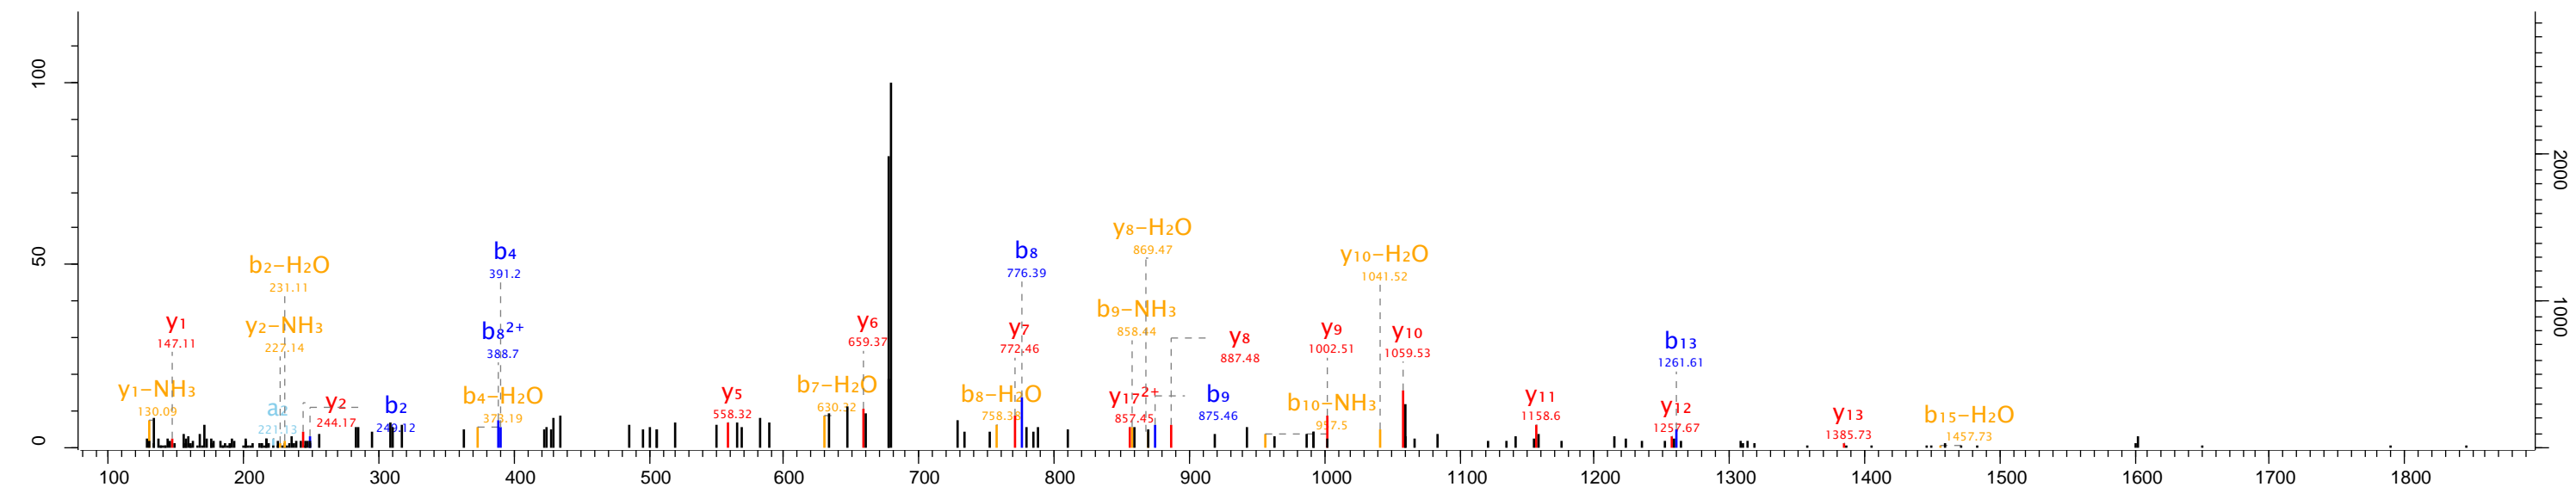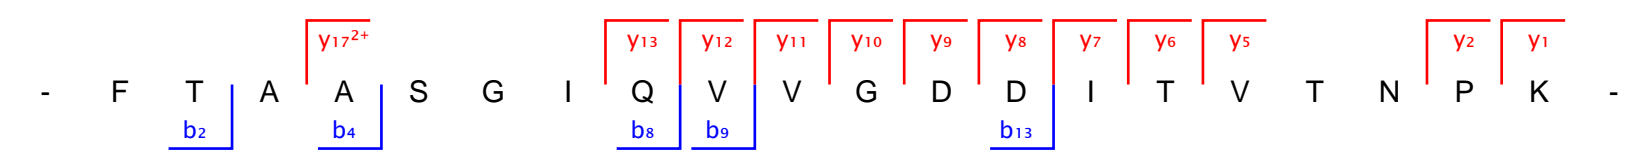

Spectral Annotation for Single-Peptide IDs between Single D11 Cells using Q-OT-LIT



Raw file 2015-01-08\_CL04\_Blastomere-15 Scan 48923 Method ITMS; HCD Score 41.96 m/z 678.69

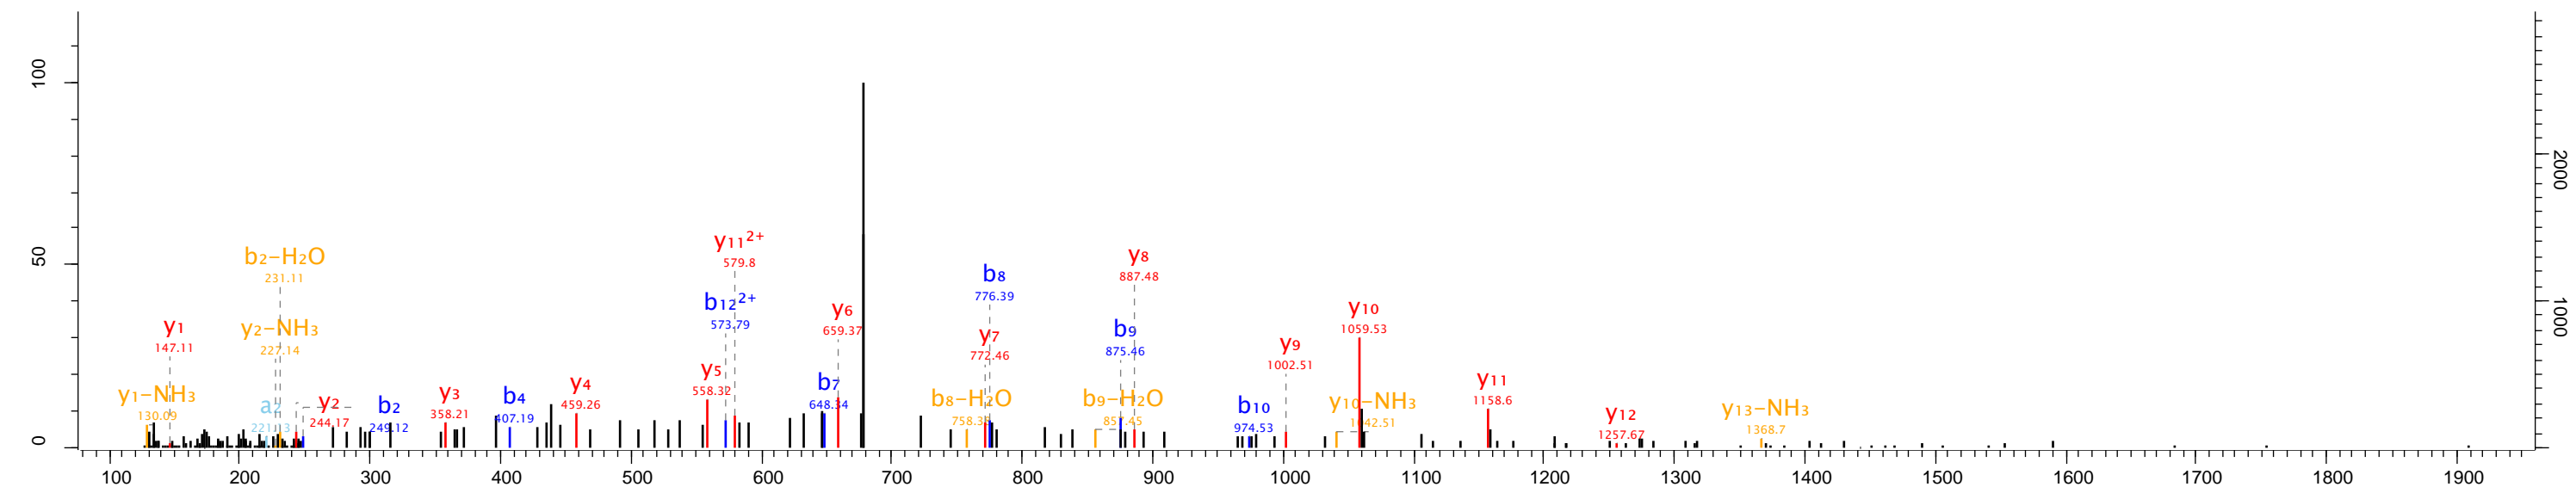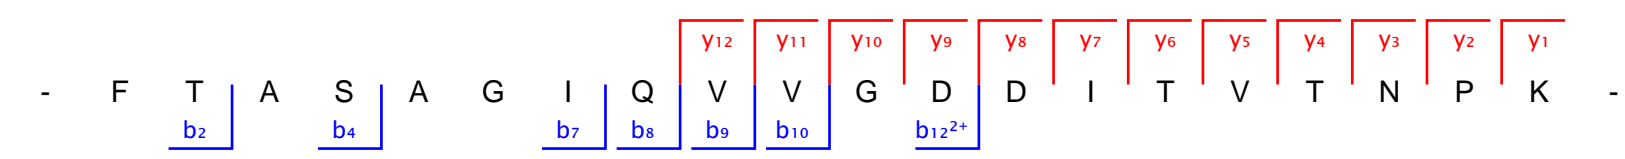

Spectral Annotation for Single-Peptide IDs between Single D11 Cells using Q-OT-LIT

Raw file 2015-01-08\_CL04\_Blastomere-15 Scan 48941 Method ITMS; HCD Score 41 m/z 678.69

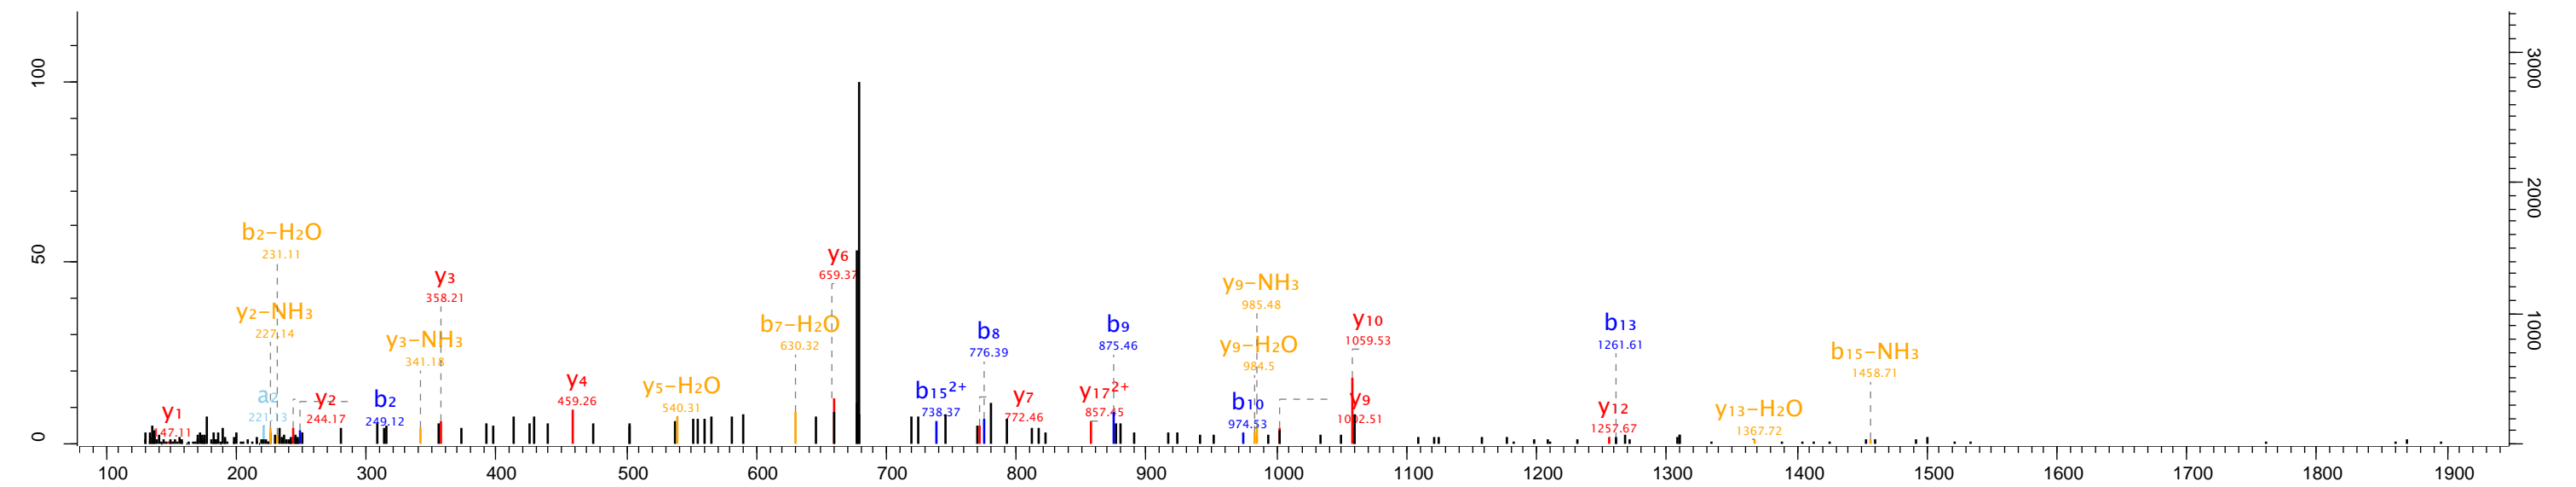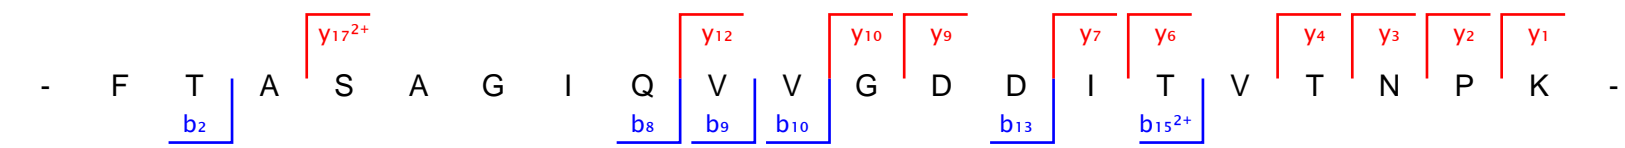

Spectral Annotation for Single-Peptide IDs between Single D11 Cells using Q-OT-LIT

Raw file 2015-01-08\_CL04\_Blastomere-15 Scan 49135 Method ITMS; HCD Score 44.85 m/z 729.67

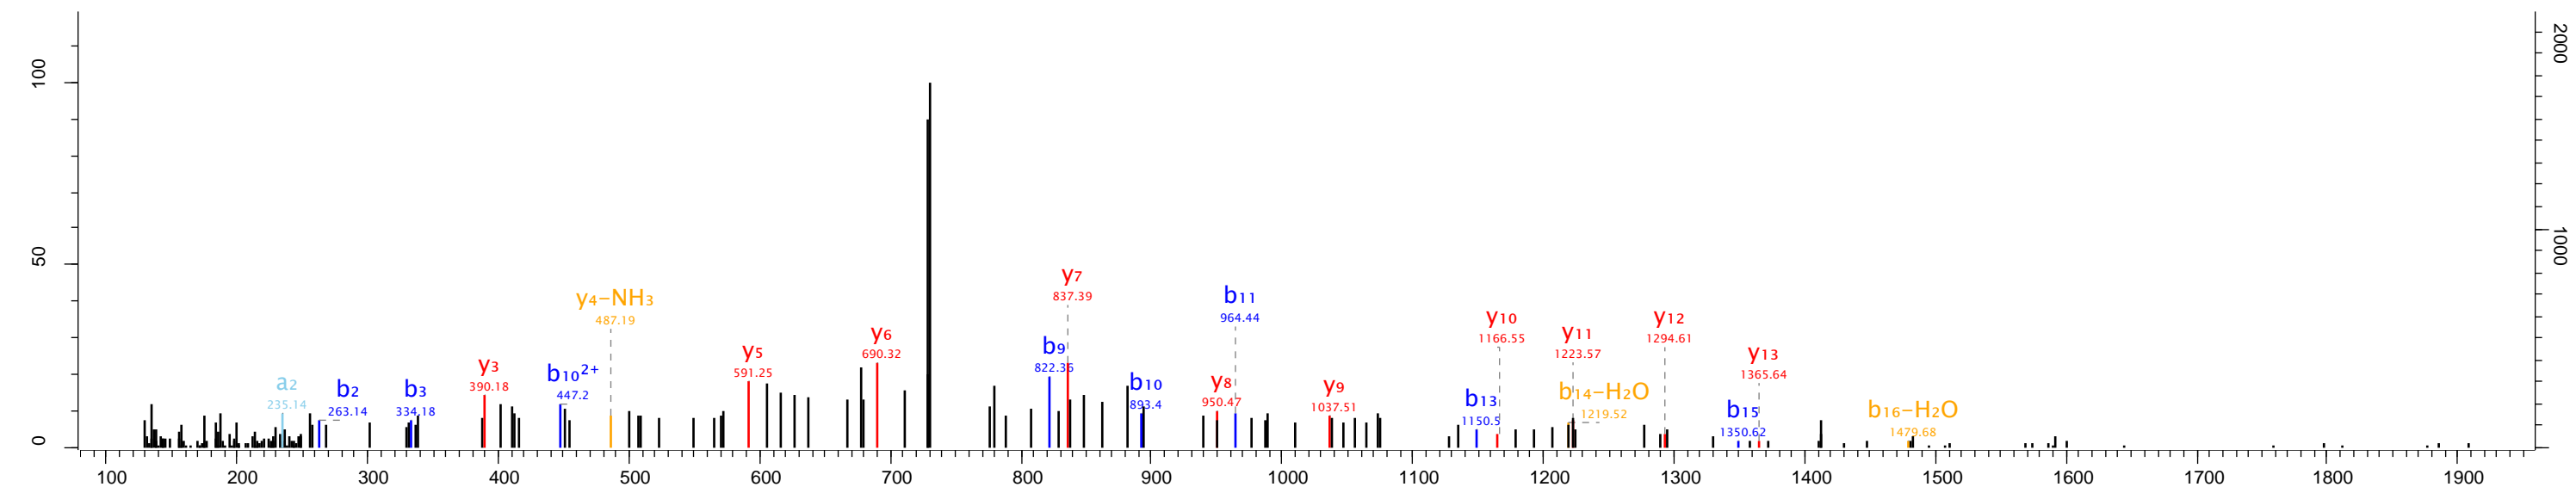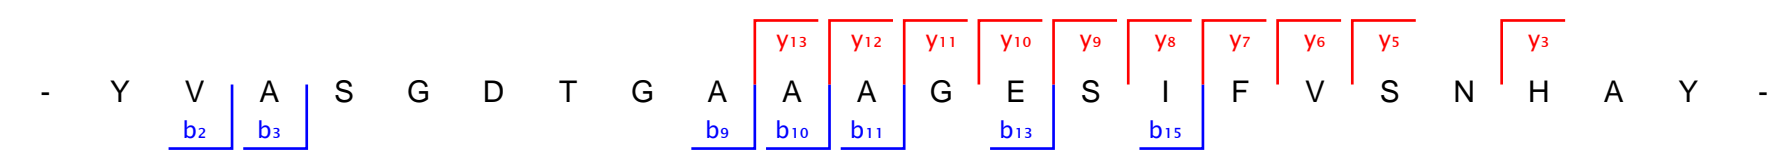

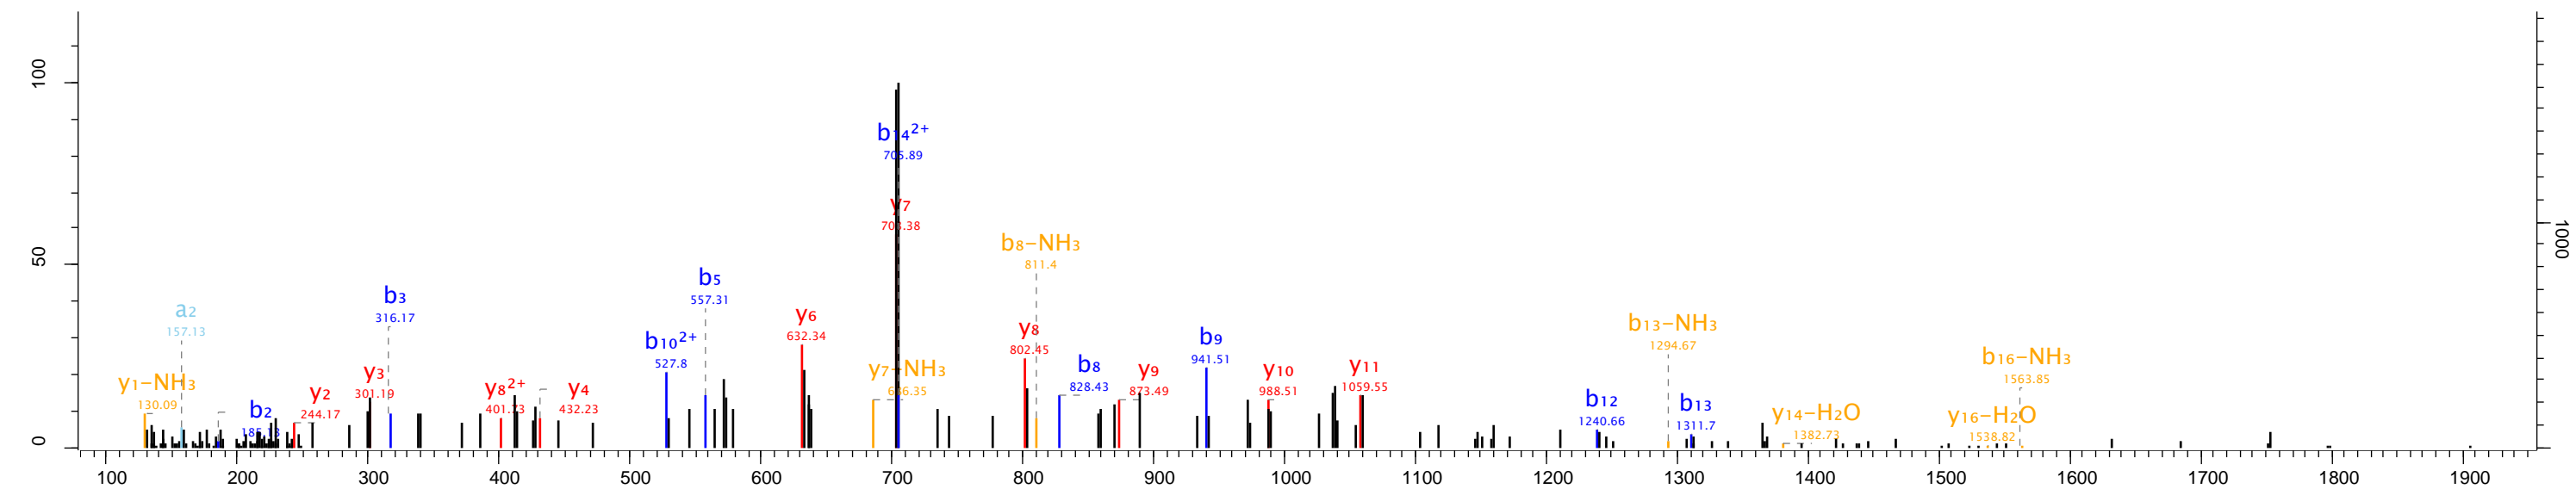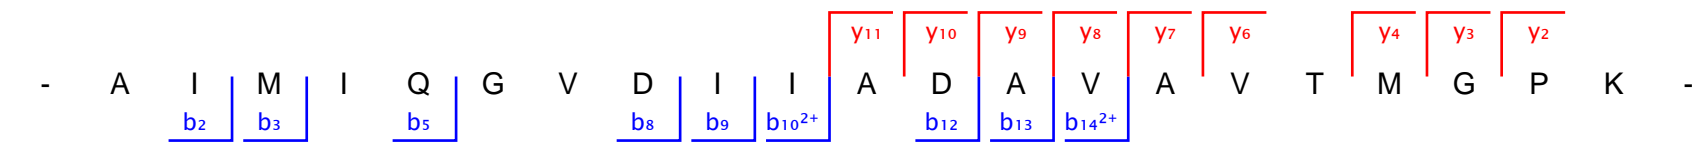

Raw file 2015-01-08\_CL04\_Blastomere-15 Scan 50084 Method ITMS; HCD Score 63.87 m/z 705.38

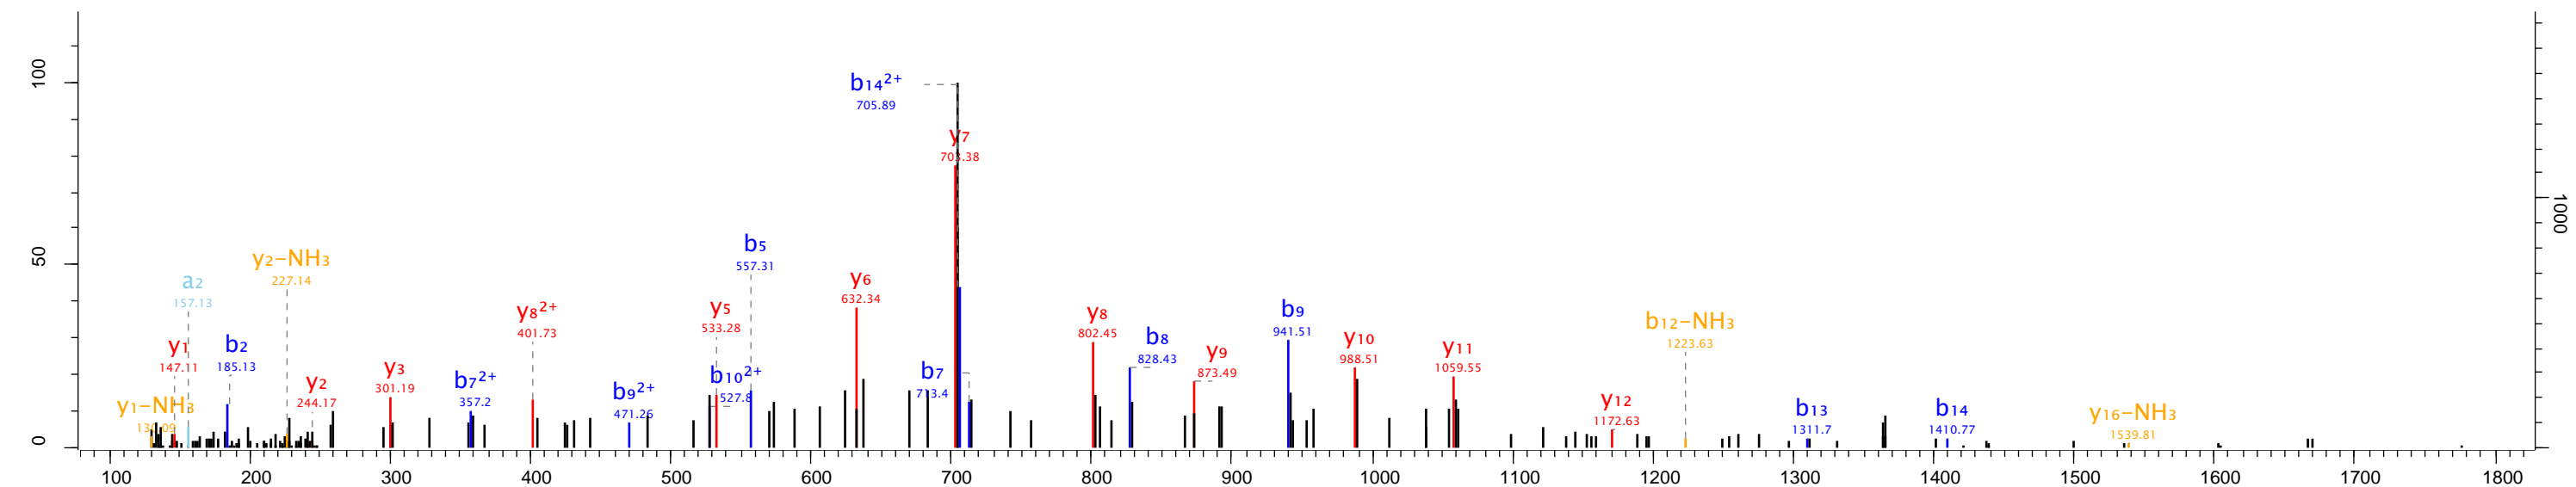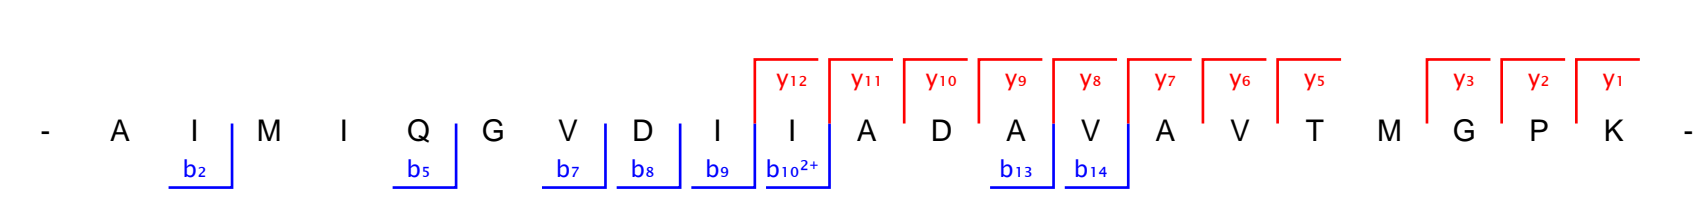

Spectral Annotation for Single-Peptide IDs between Single D11 Cells using Q-OT-LIT

Raw file 2015-01-08\_CL04\_Blastomere-15 Scan 50267 Method ITMS; HCD Score 32.03 m/z 785.39

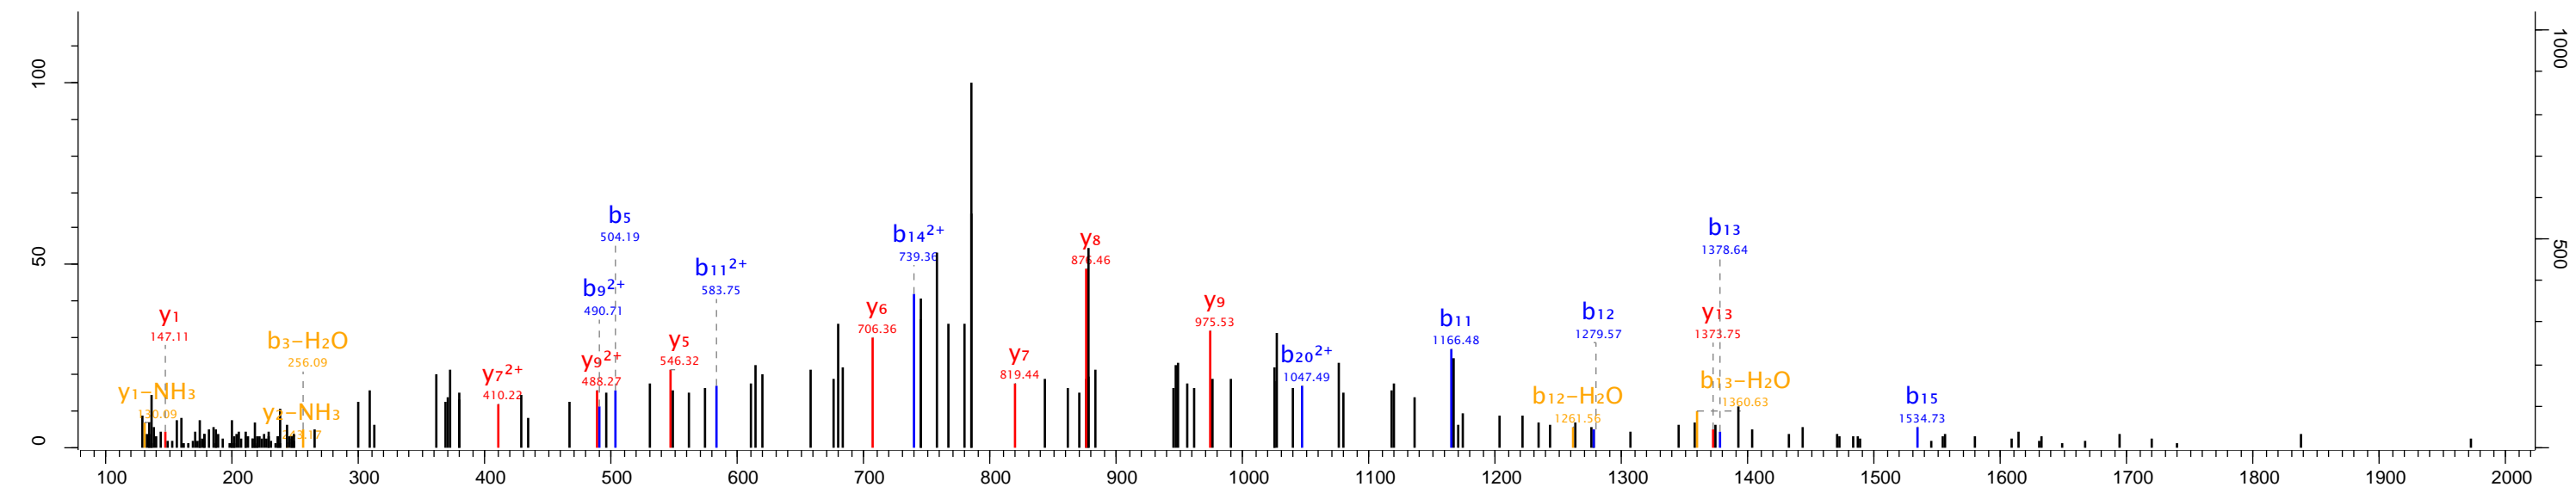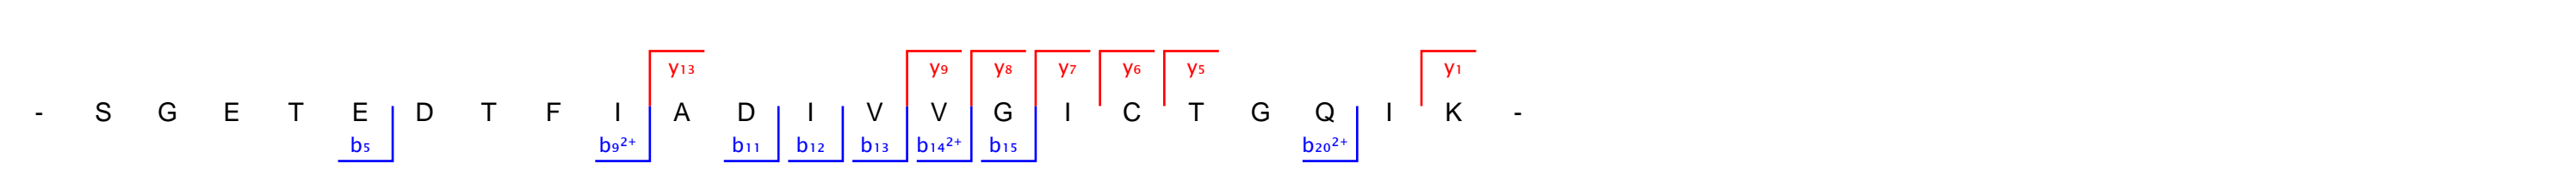

Spectral Annotation for Single-Peptide IDs between Single D11 Cells using Q-OT-LIT

Raw file 2015-01-08\_CL04\_Blastomere-15 Scan 50291 Method ITMS; HCD Score 41.67 m/z 758.71

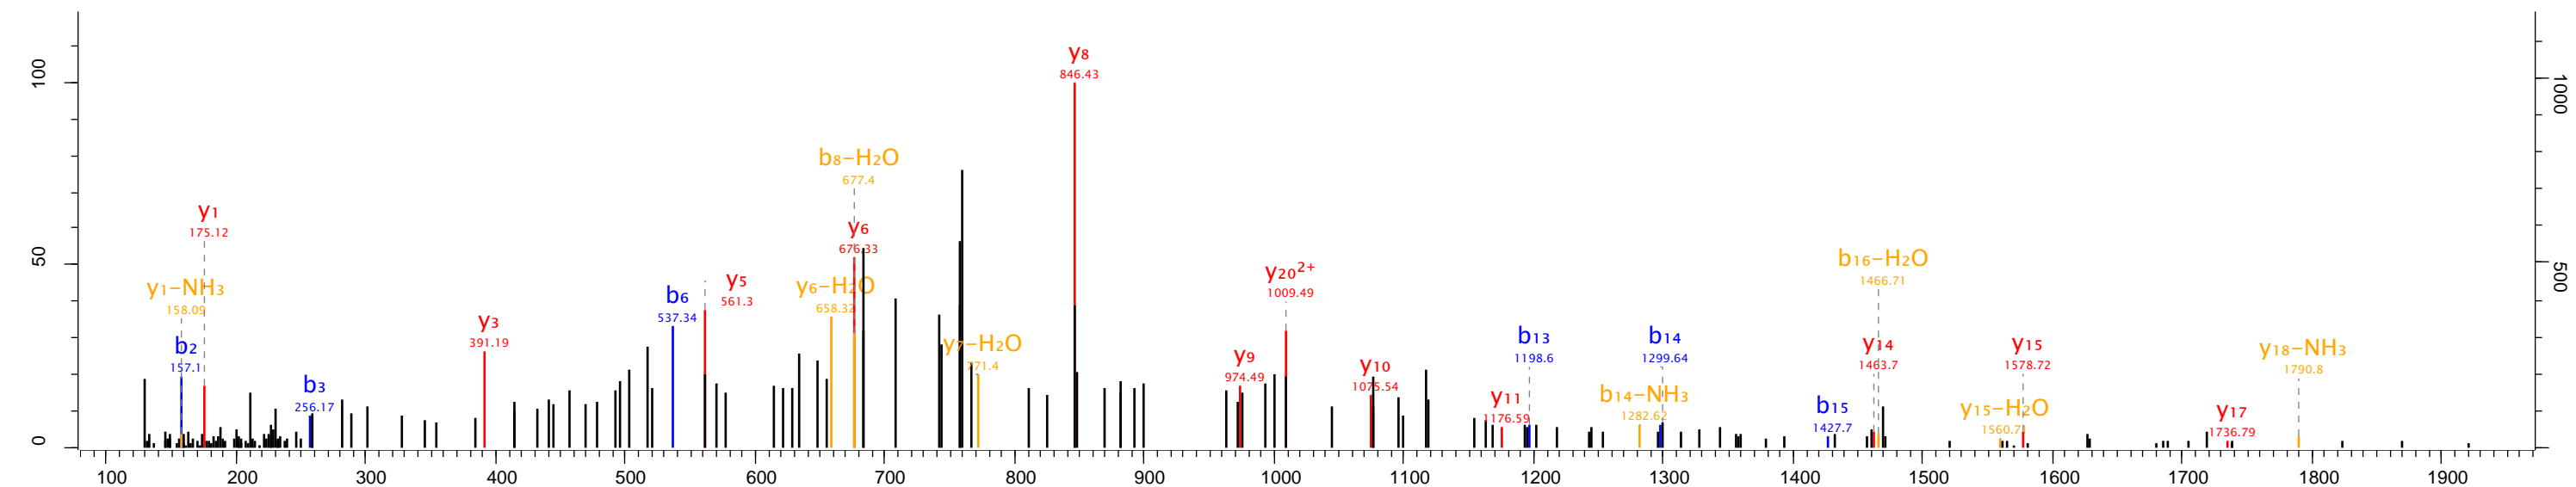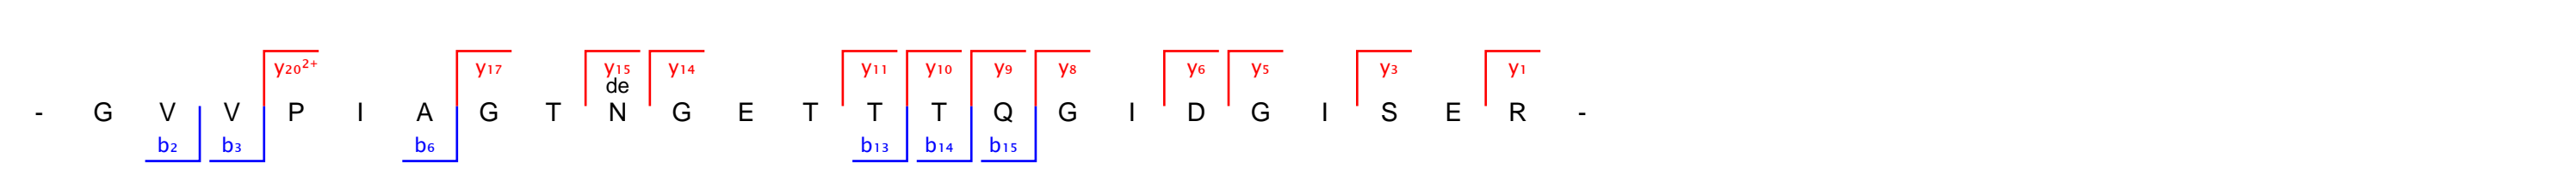

Spectral Annotation for Single-Peptide IDs between Single D11 Cells using Q-OT-LIT

Raw file 2015-01-08\_CL04\_Blastomere-15 Scan 50611 Method ITMS; HCD Score 62.79 m/z 773.38

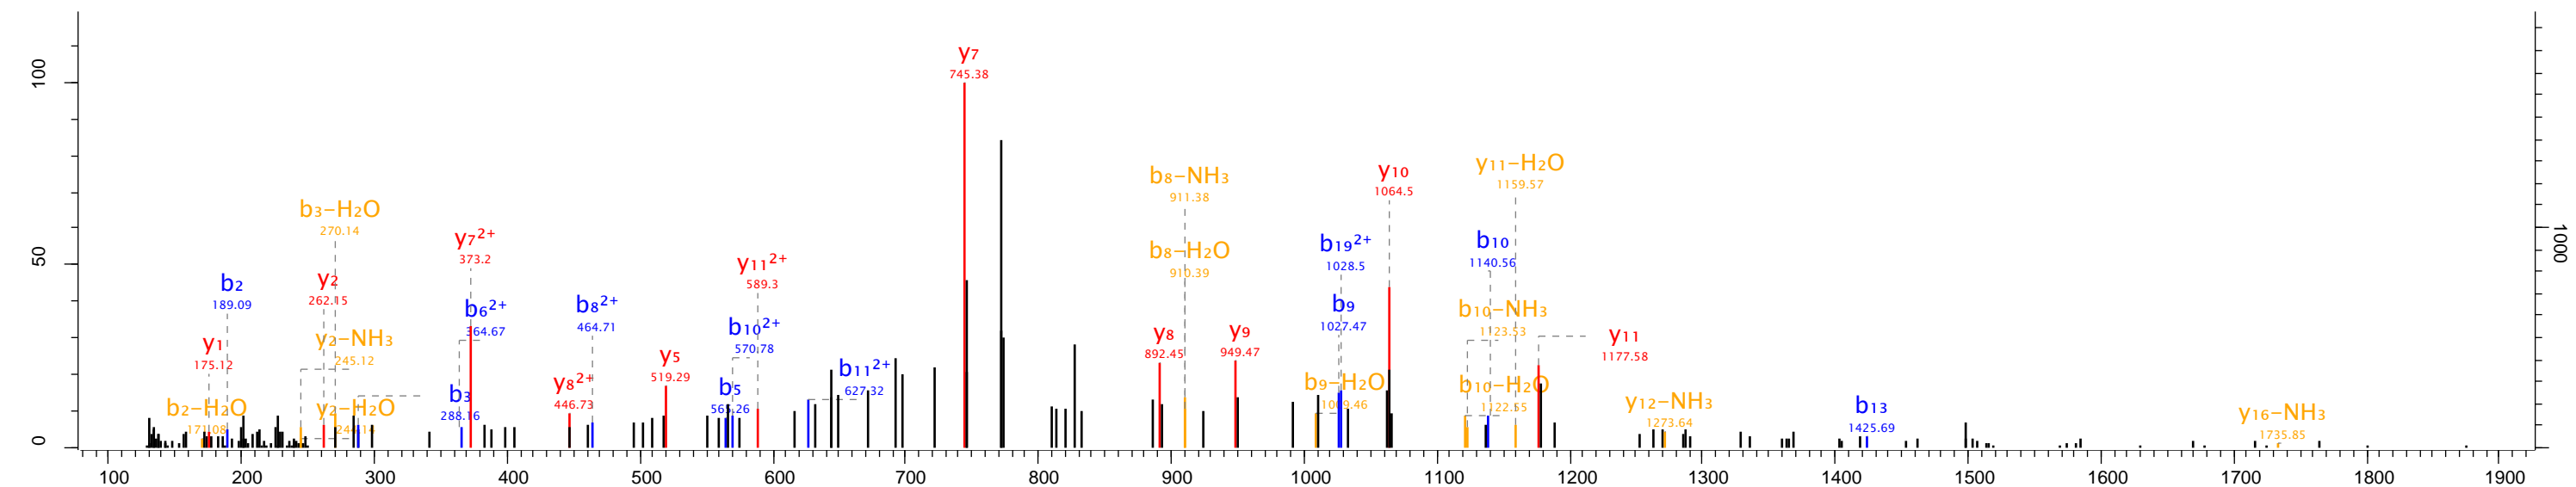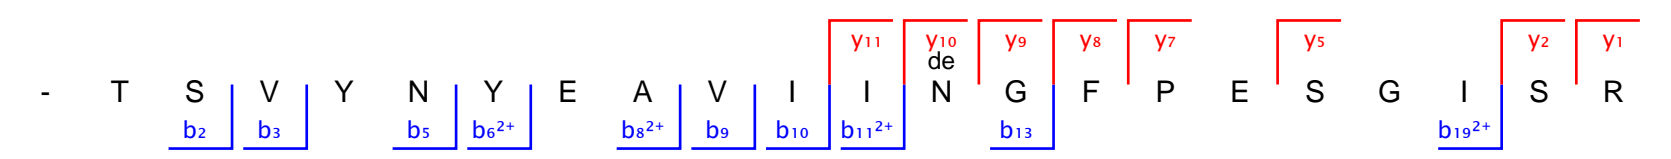

Spectral Annotation for Single-Peptide IDs between Single D11 Cells using Q-OT-LIT



Raw file 2015-01-08\_CL04\_Blastomere-15 Scan 50709 Method ITMS; HCD Score 45.71 m/z 817.04

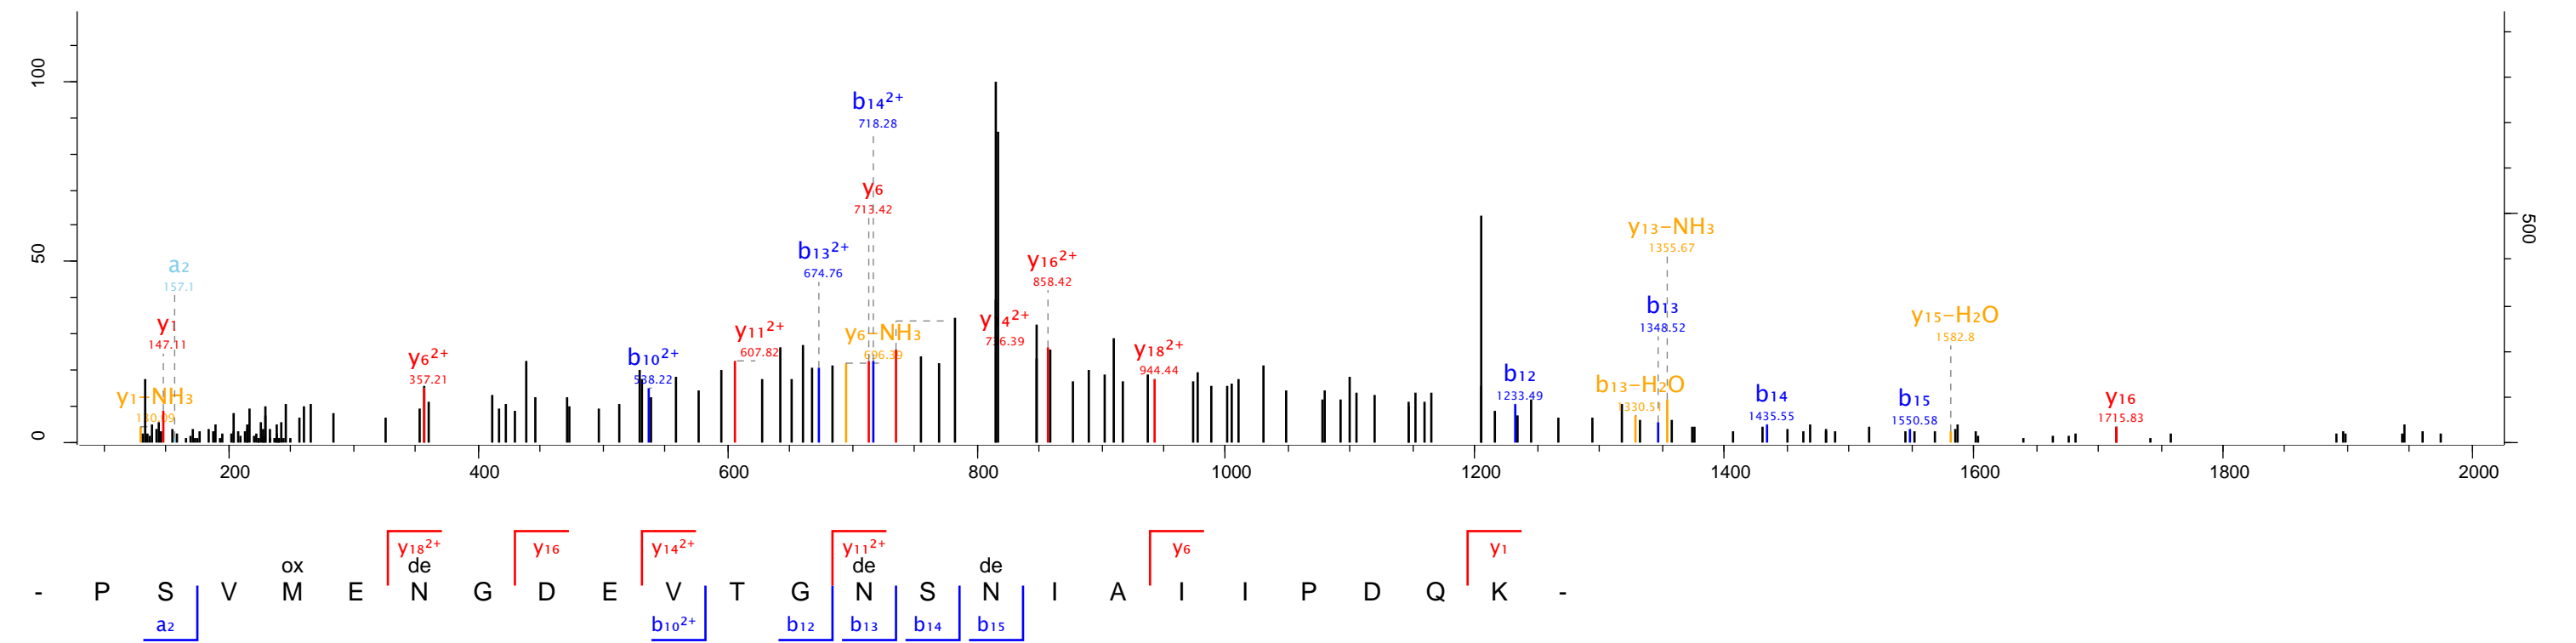

Raw file 2015-01-08\_CL04\_Blastomere-15 Scan 50846 Method ITMS; HCD Score 42.21 m/z 758.71

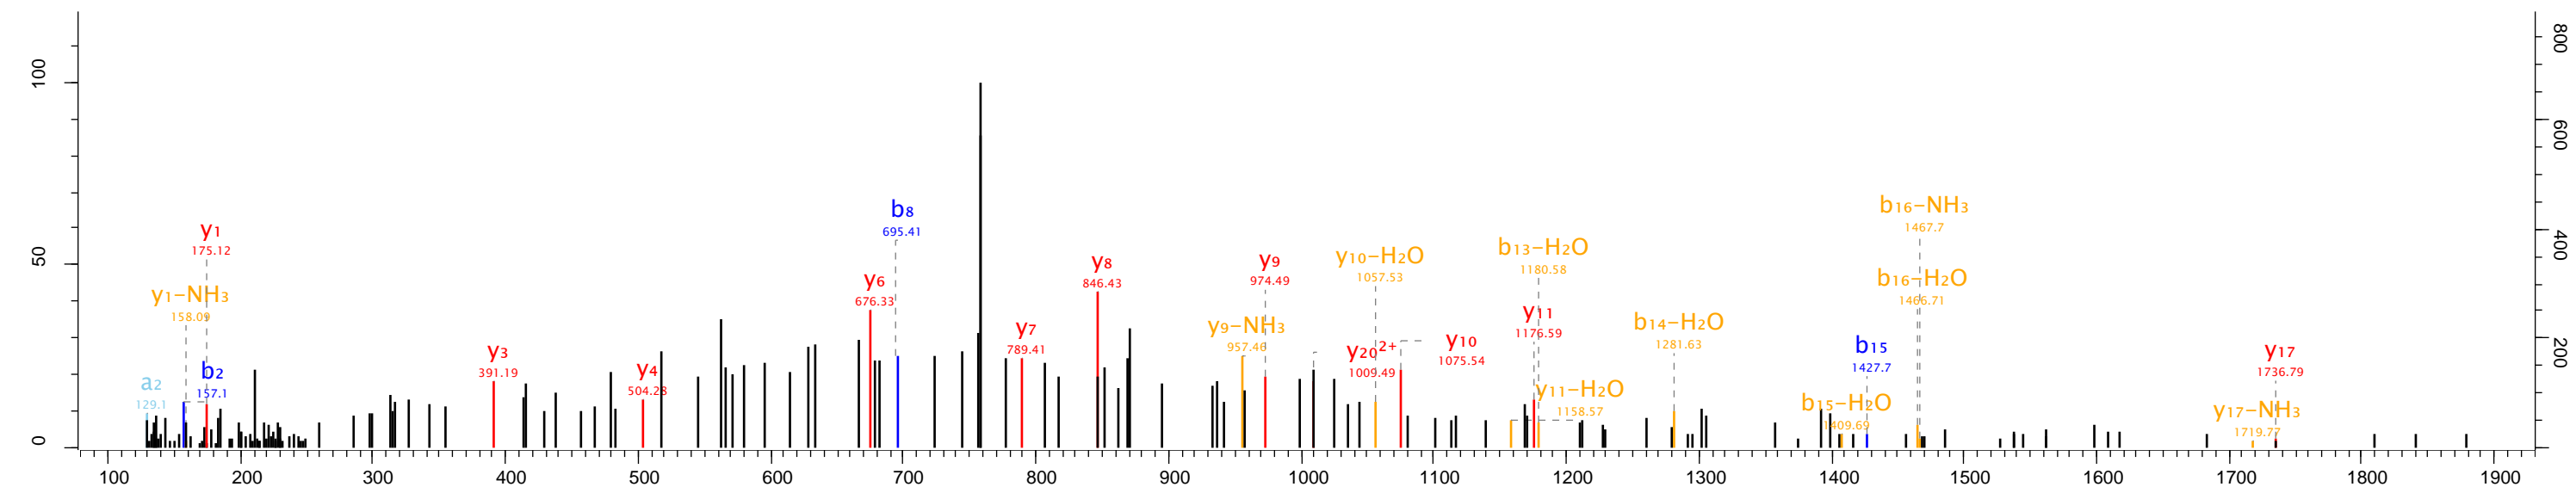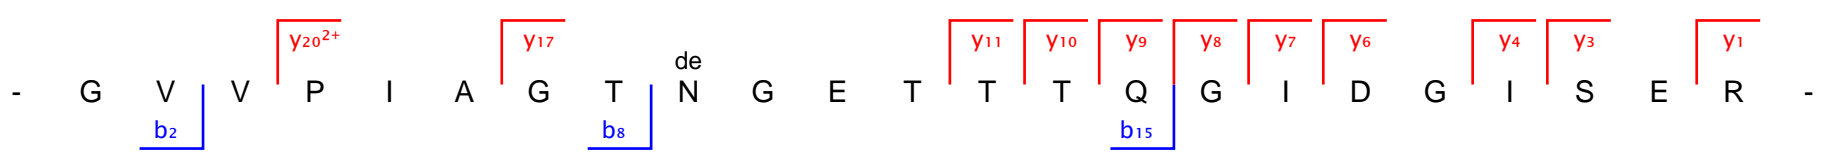

Spectral Annotation for Single-Peptide IDs between Single D11 Cells using Q-OT-LIT

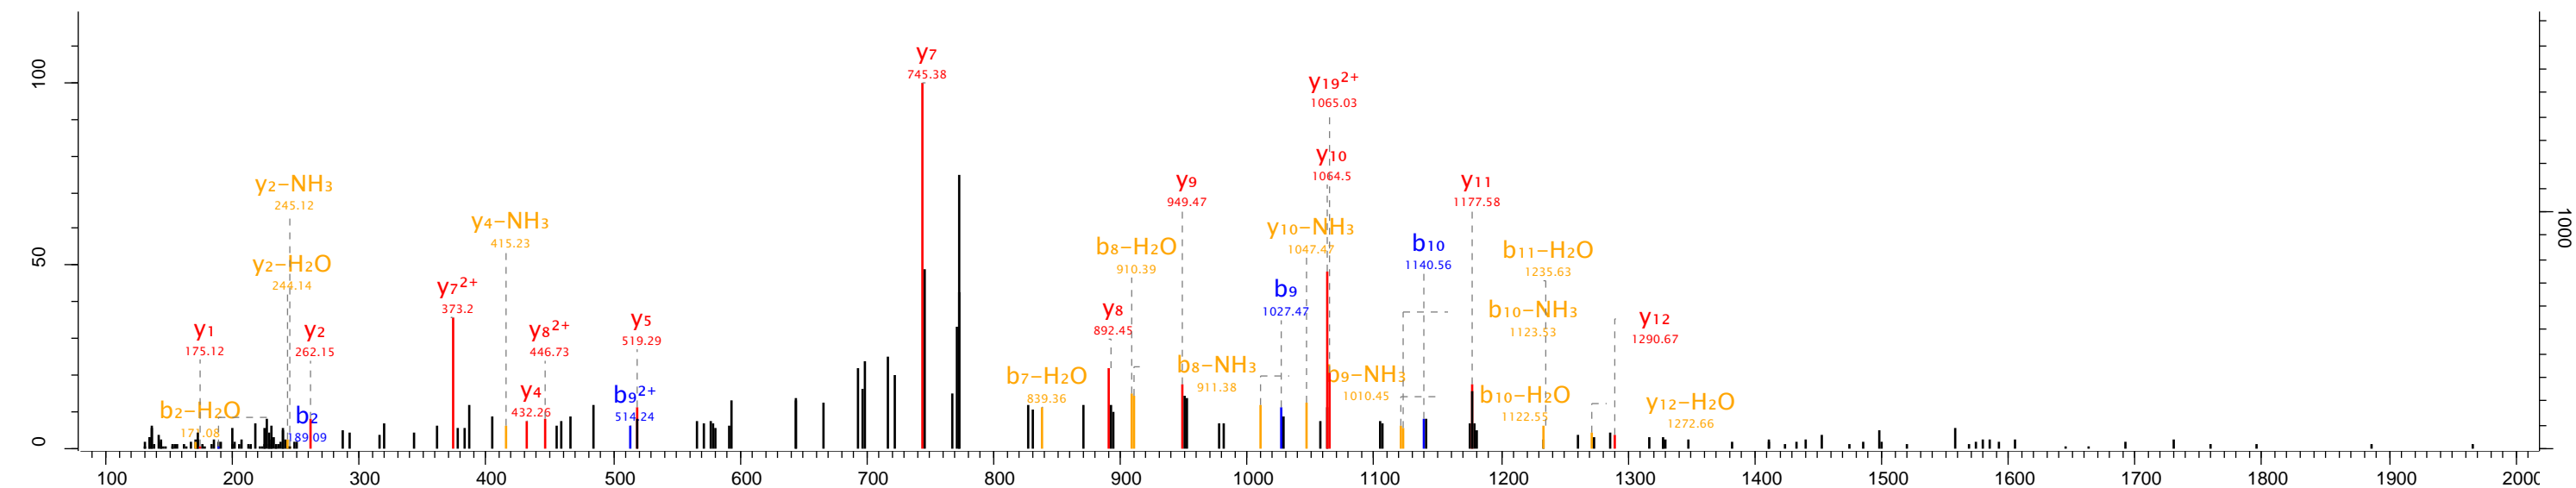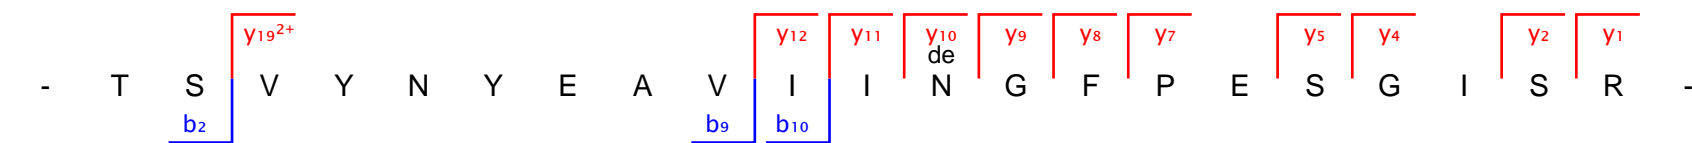

Raw file 2015-01-08\_CL04\_Blastomere-15 Scan 51047 Method ITMS; HCD Score 54.01 m/z 773.38

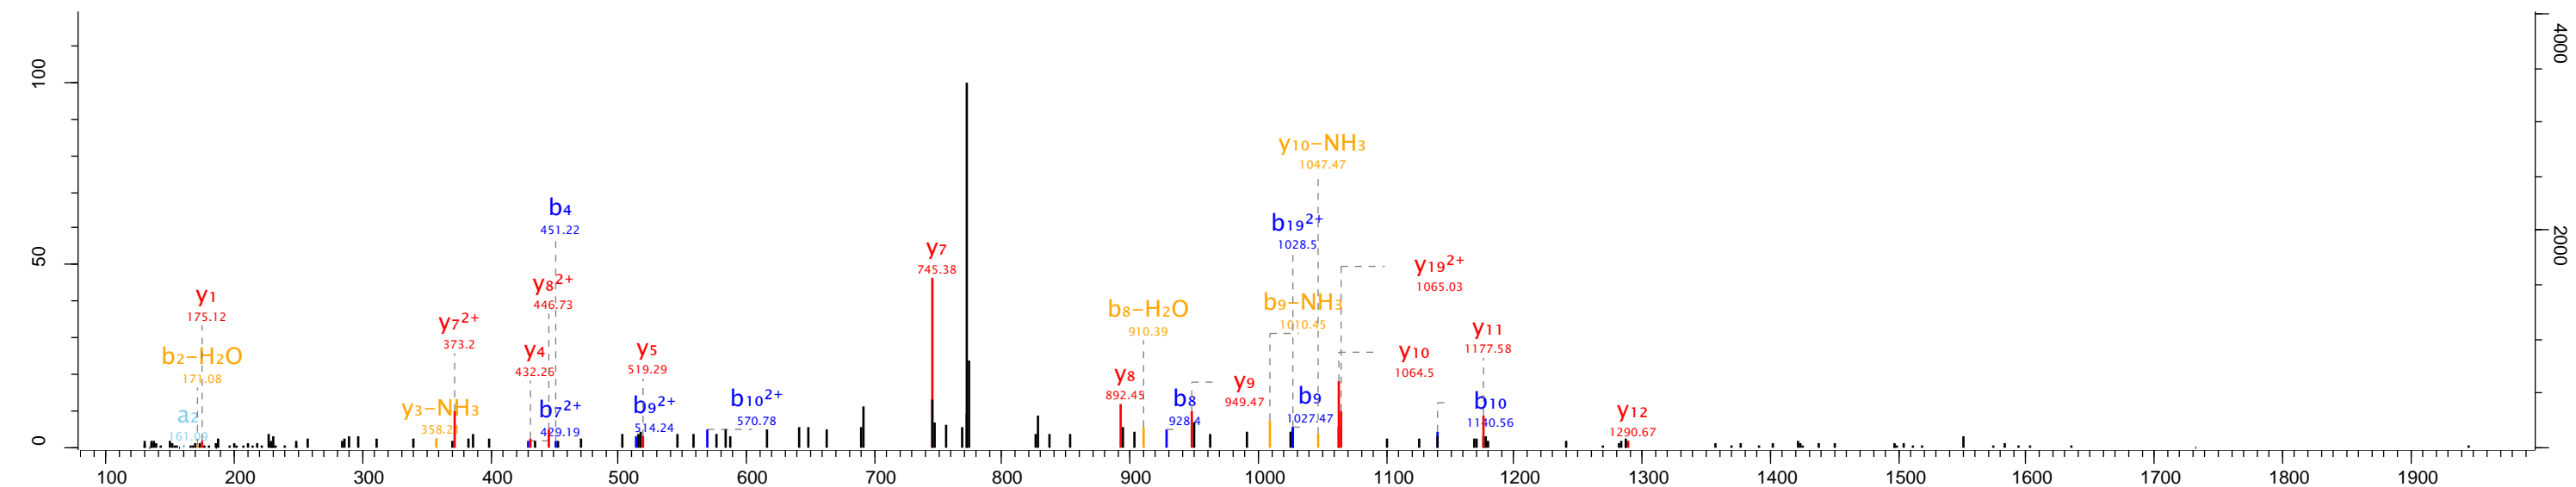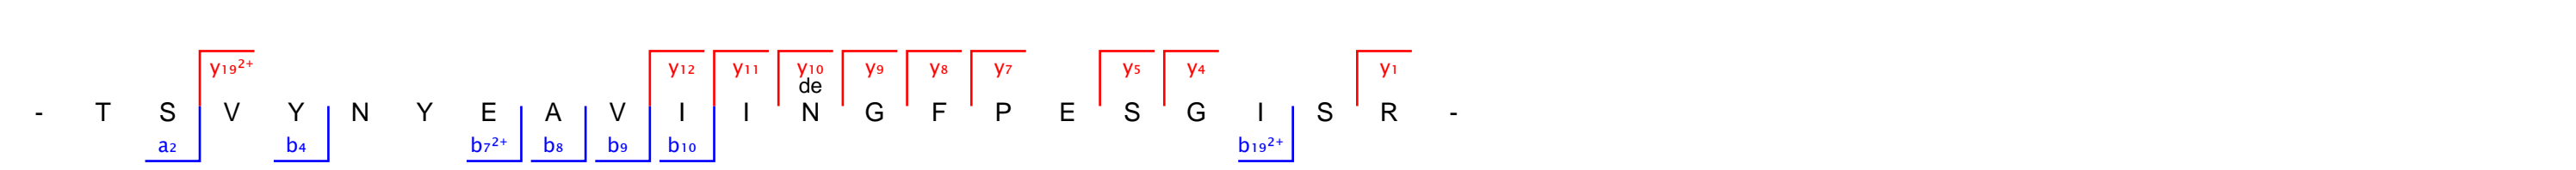

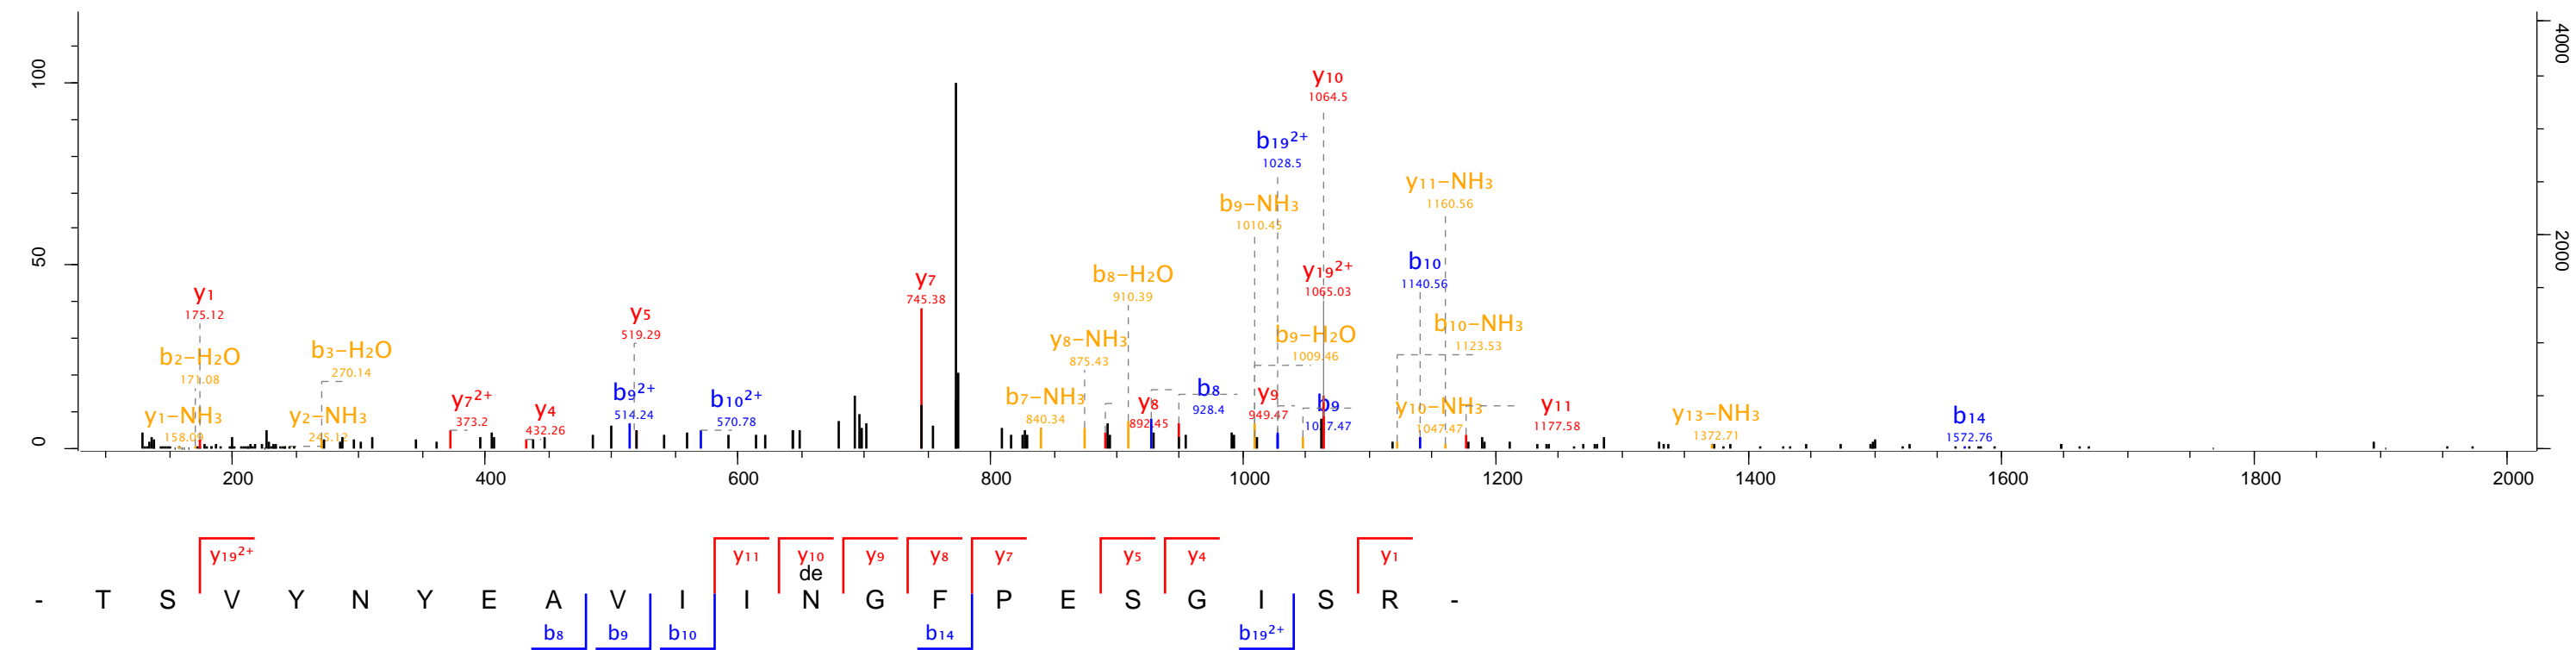

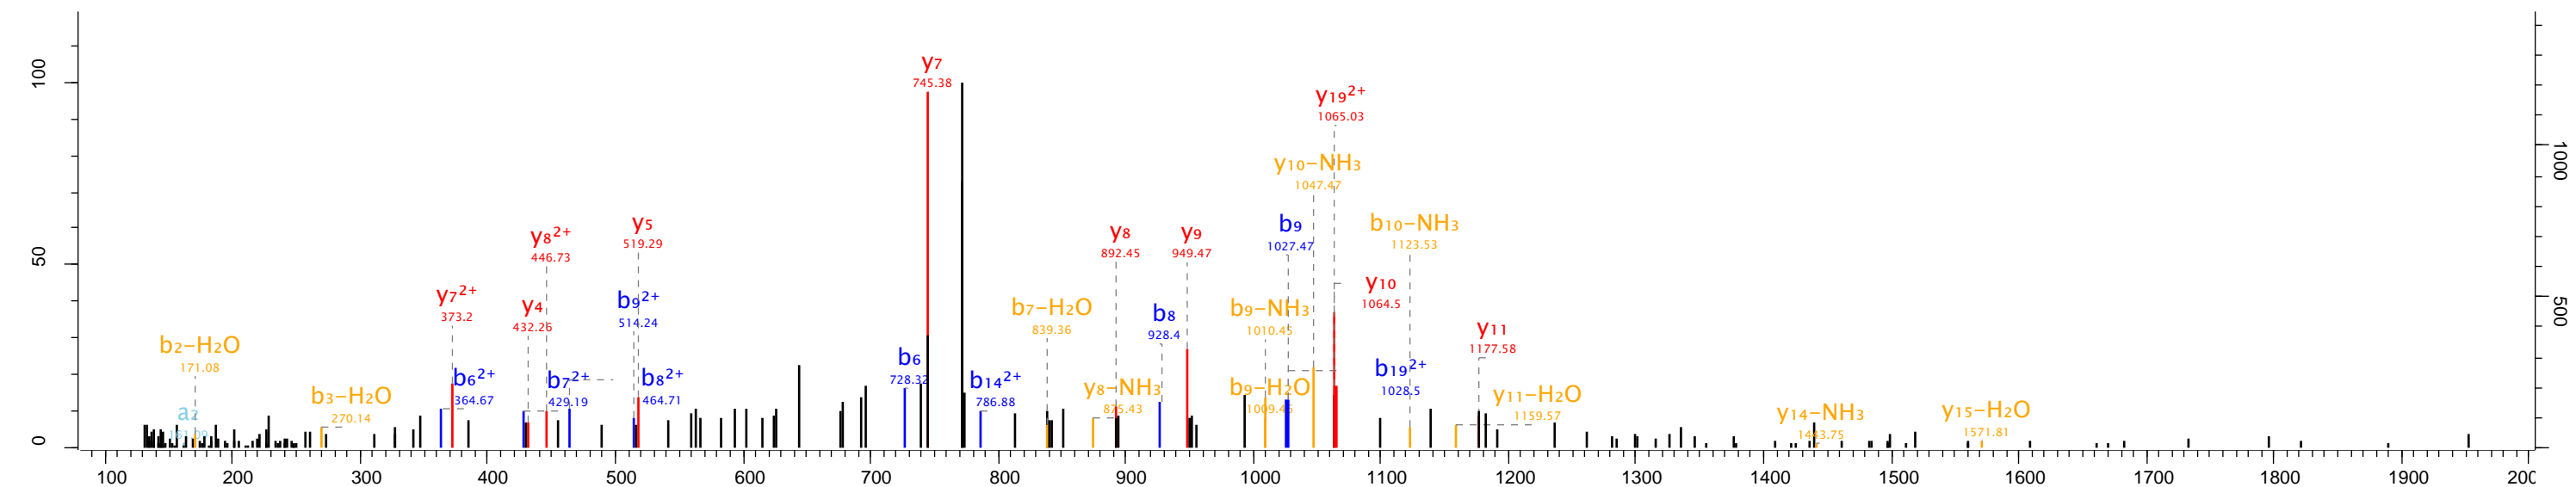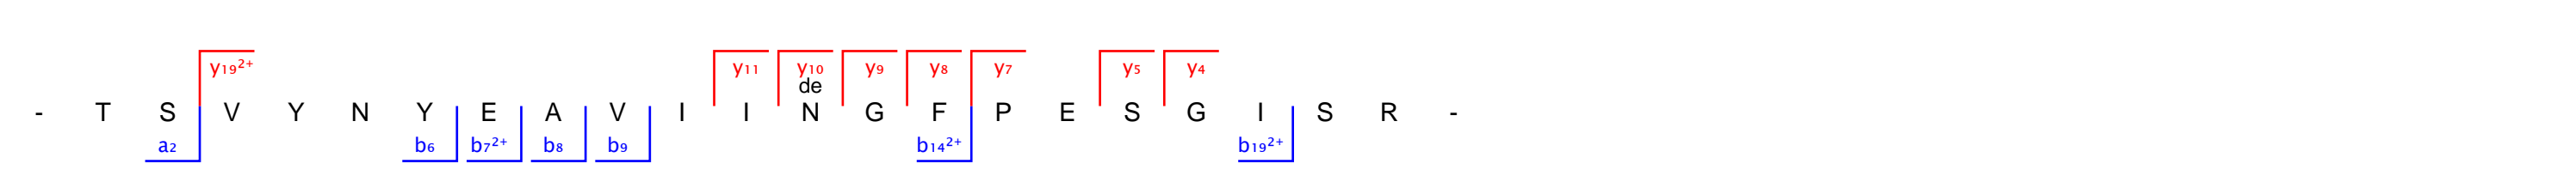

Raw file 2015-01-08\_CL04\_Blastomere-15 Scan 51749 Method ITMS; HCD Score 45.24 m/z 773.38

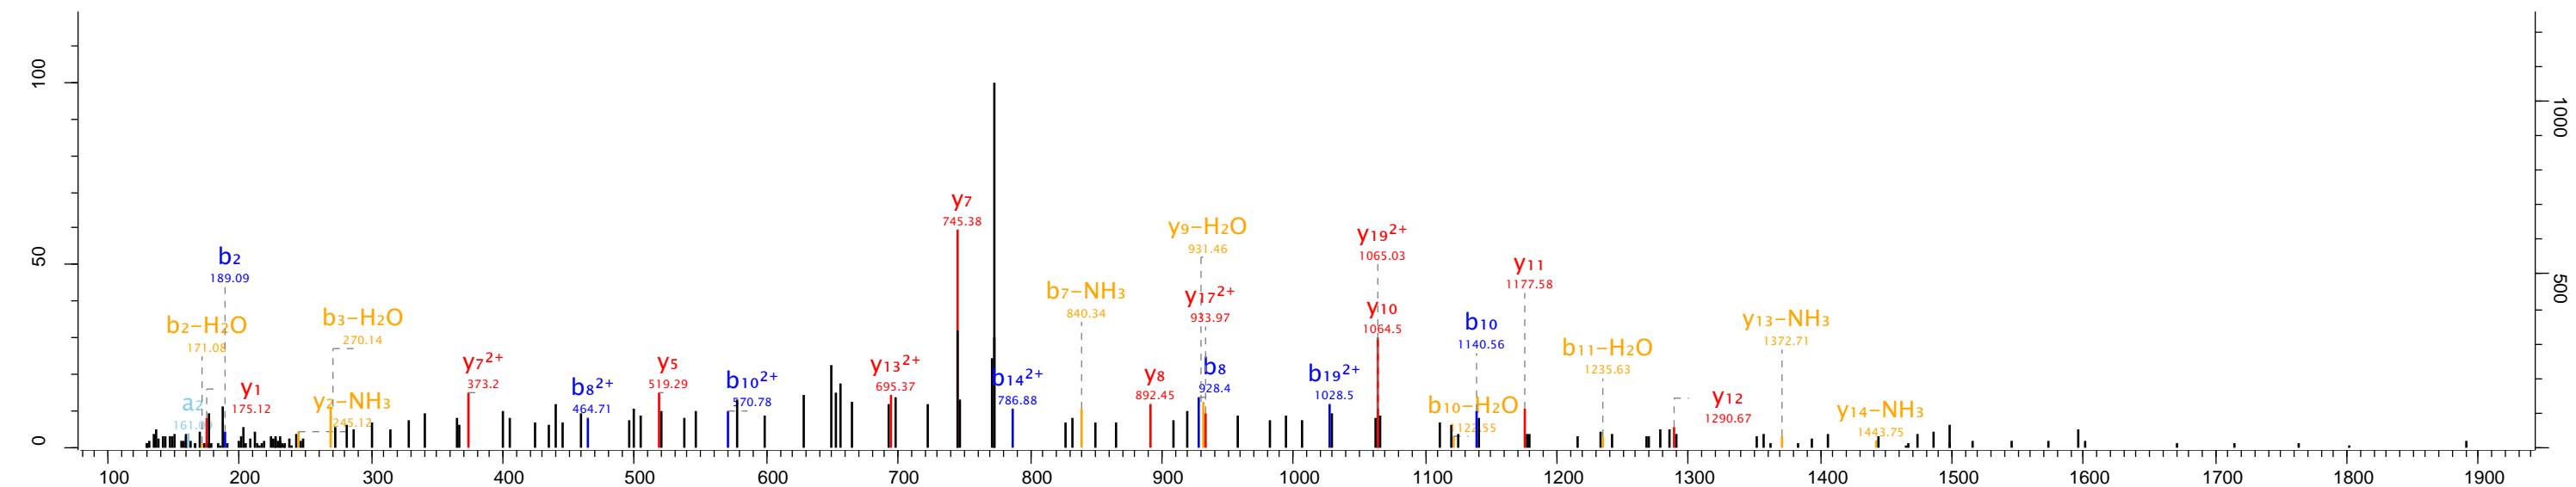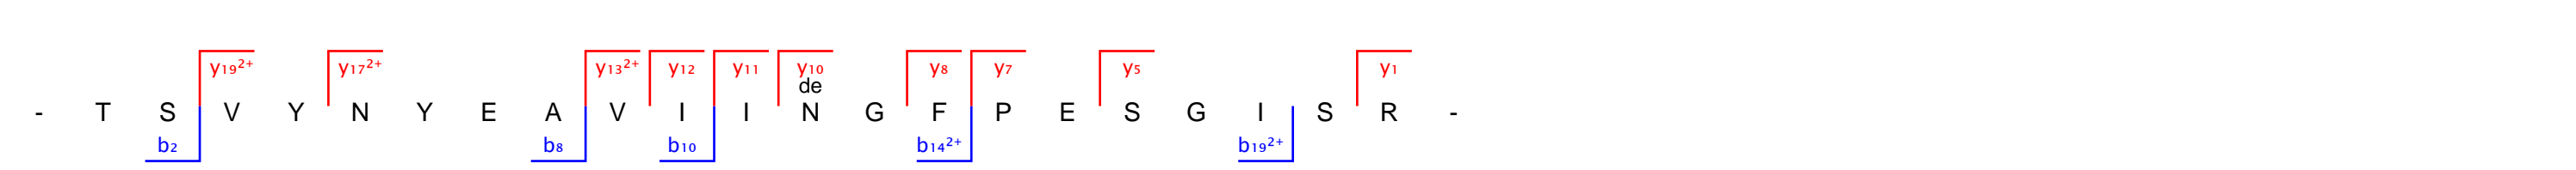

Raw file 2015-01-08\_CL04\_Blastomere-15 Scan 51787 Method ITMS; HCD Score 57.05 m/z 773.38

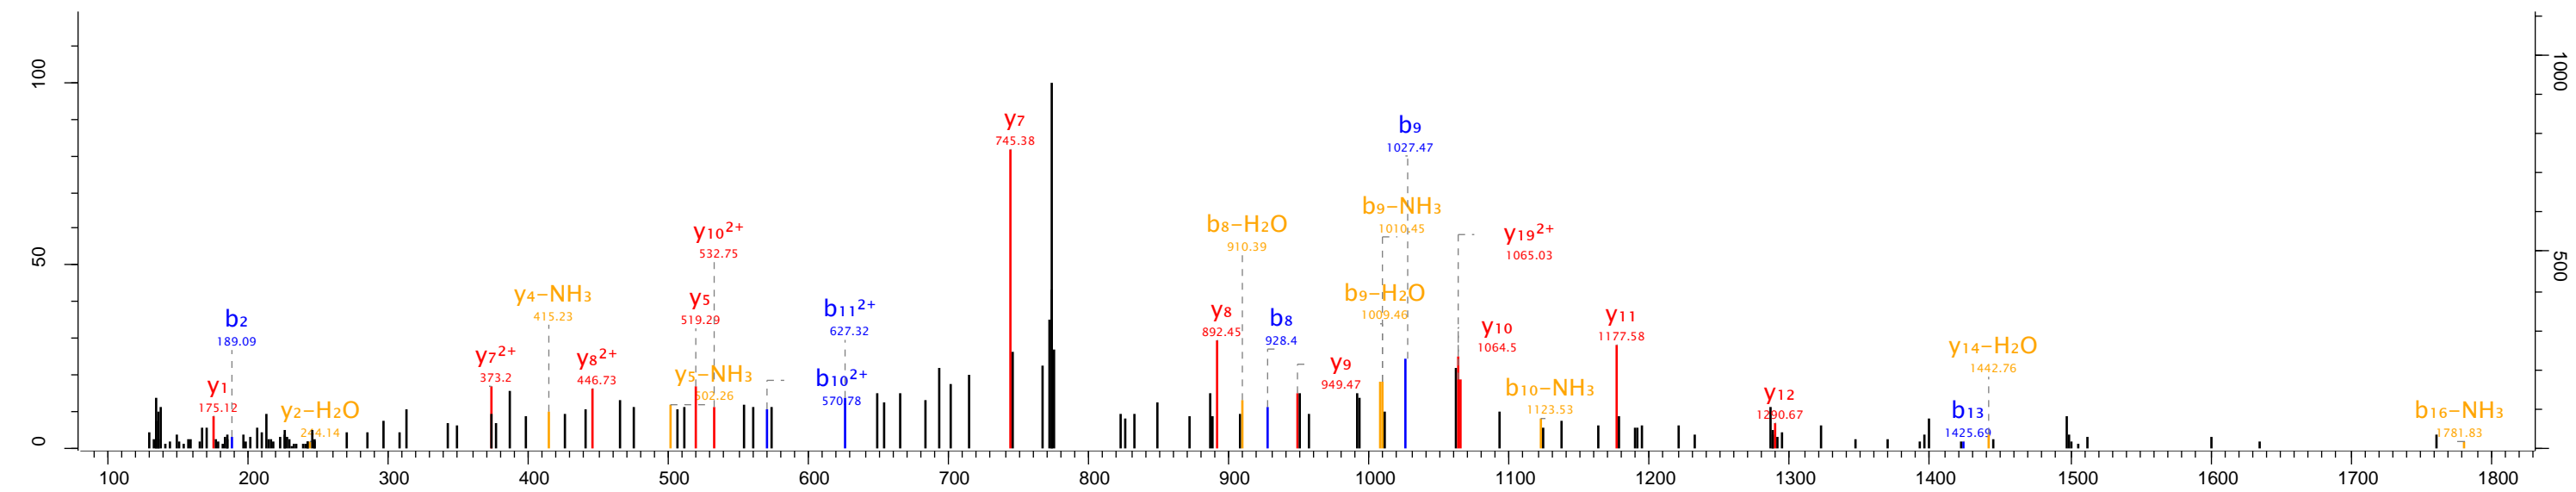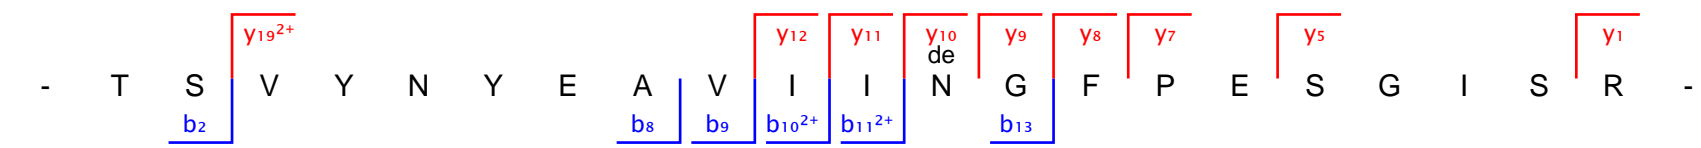

Spectral Annotation for Single-Peptide IDs between Single D11 Cells using Q-OT-LIT



Raw file 2015-01-08\_CL04\_Blastomere-15  
 Scan 51795 Method ITMS; HCD Score 56.02 m/z 773.05

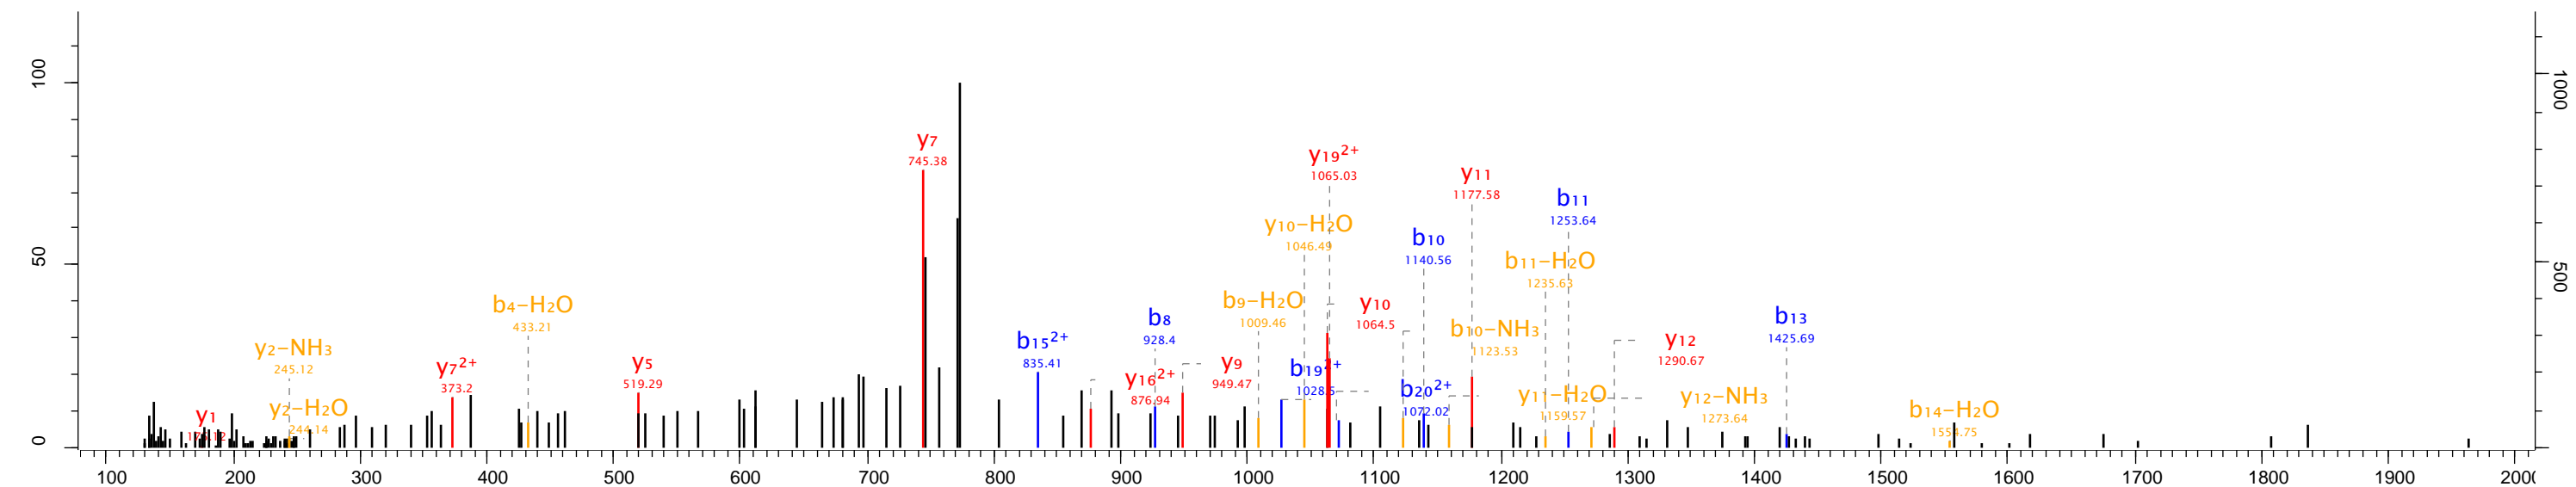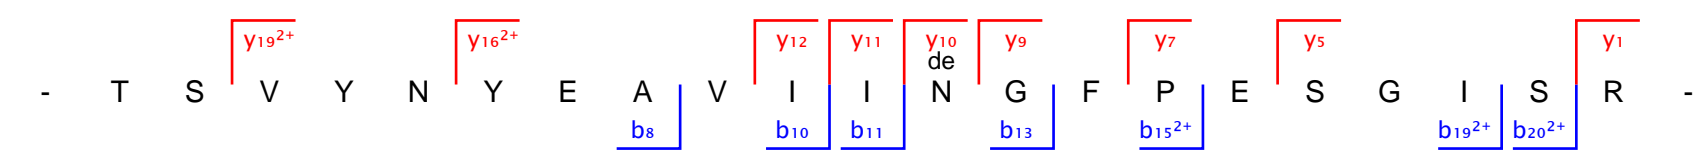

Spectral Annotation for Single-Peptide IDs between Single D11 Cells using Q-OT-LIT

Raw file 2015-01-08\_CL04\_Blastomere-15 Scan 52368 Method ITMS; HCD Score 159.2 m/z 854.42

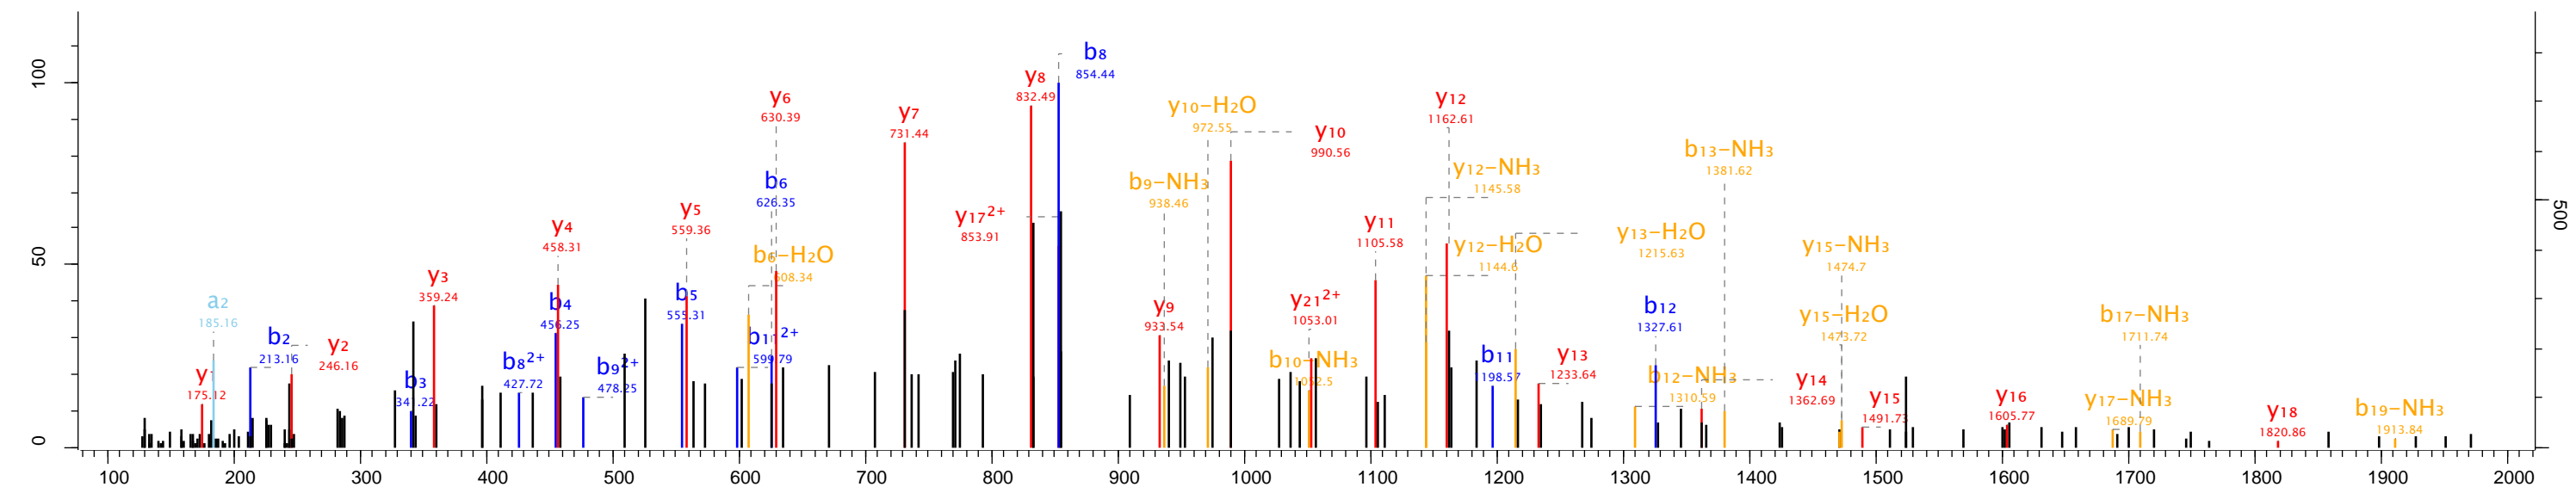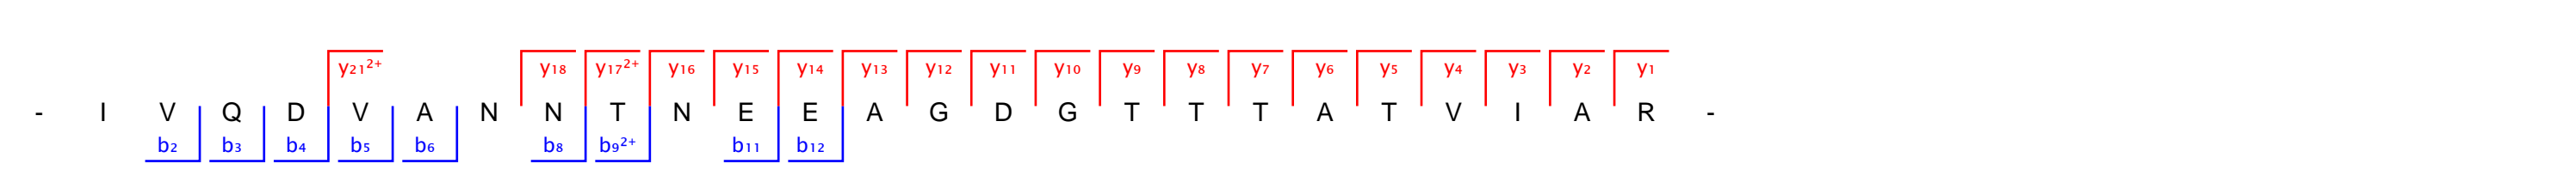

Spectral Annotation for Single-Peptide IDs between Single D11 Cells using Q-OT-LIT

Raw file 2015-01-08\_CL04\_Blastomere-15 Scan 52395 Method ITMS; HCD Score 123.29 m/z 854.42

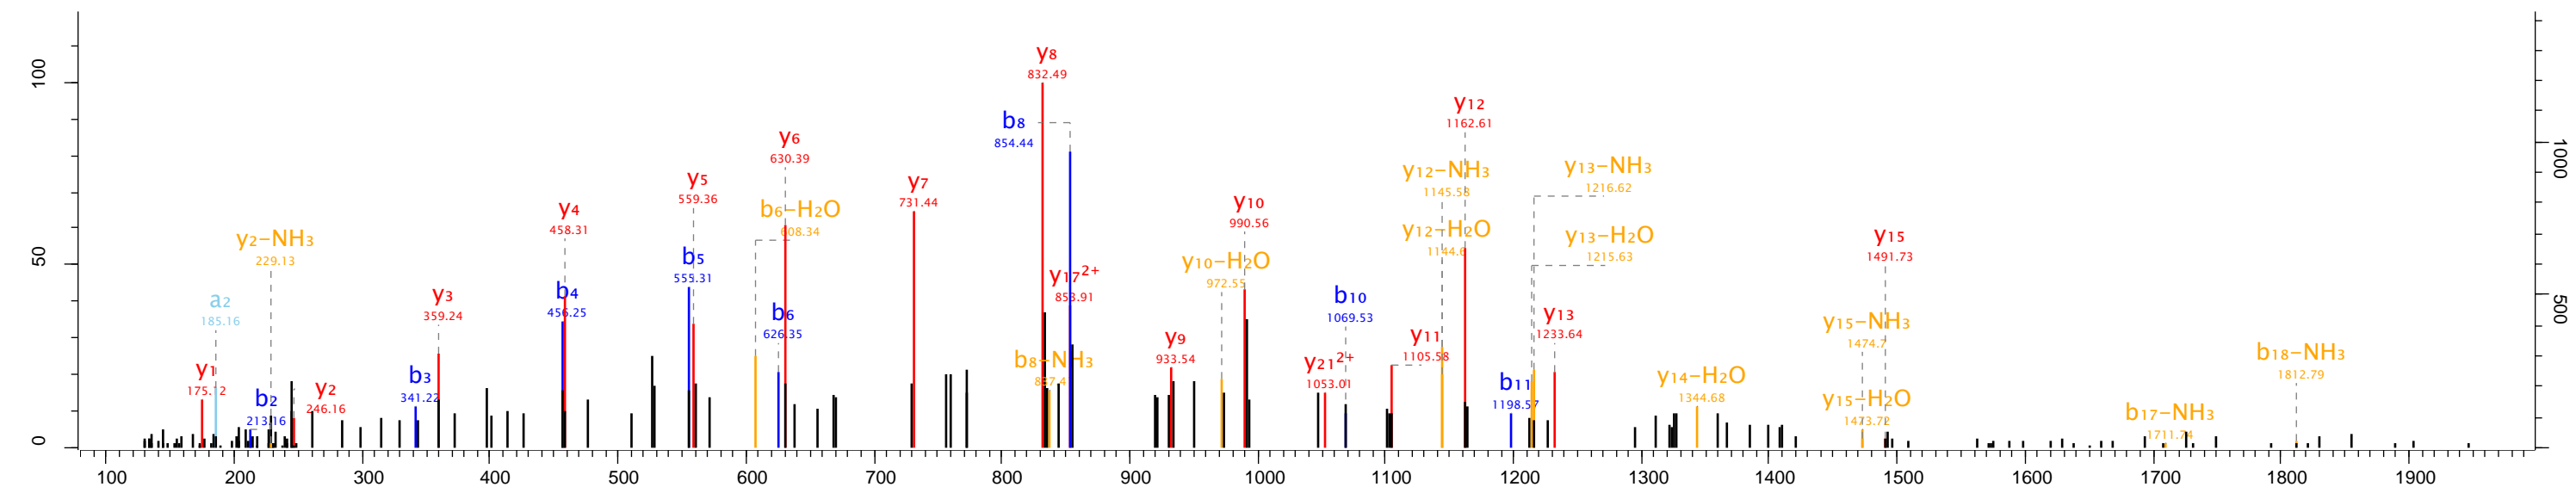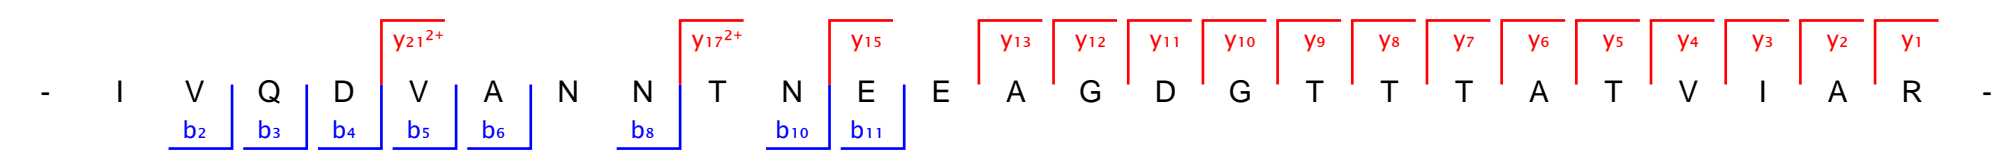

Spectral Annotation for Single-Peptide IDs between Single D11 Cells using Q-OT-LIT

Raw file 2015-01-08\_CL04\_Blastomere-15 Scan 52431 Method ITMS; HCD Score 43.64 m/z 640.81

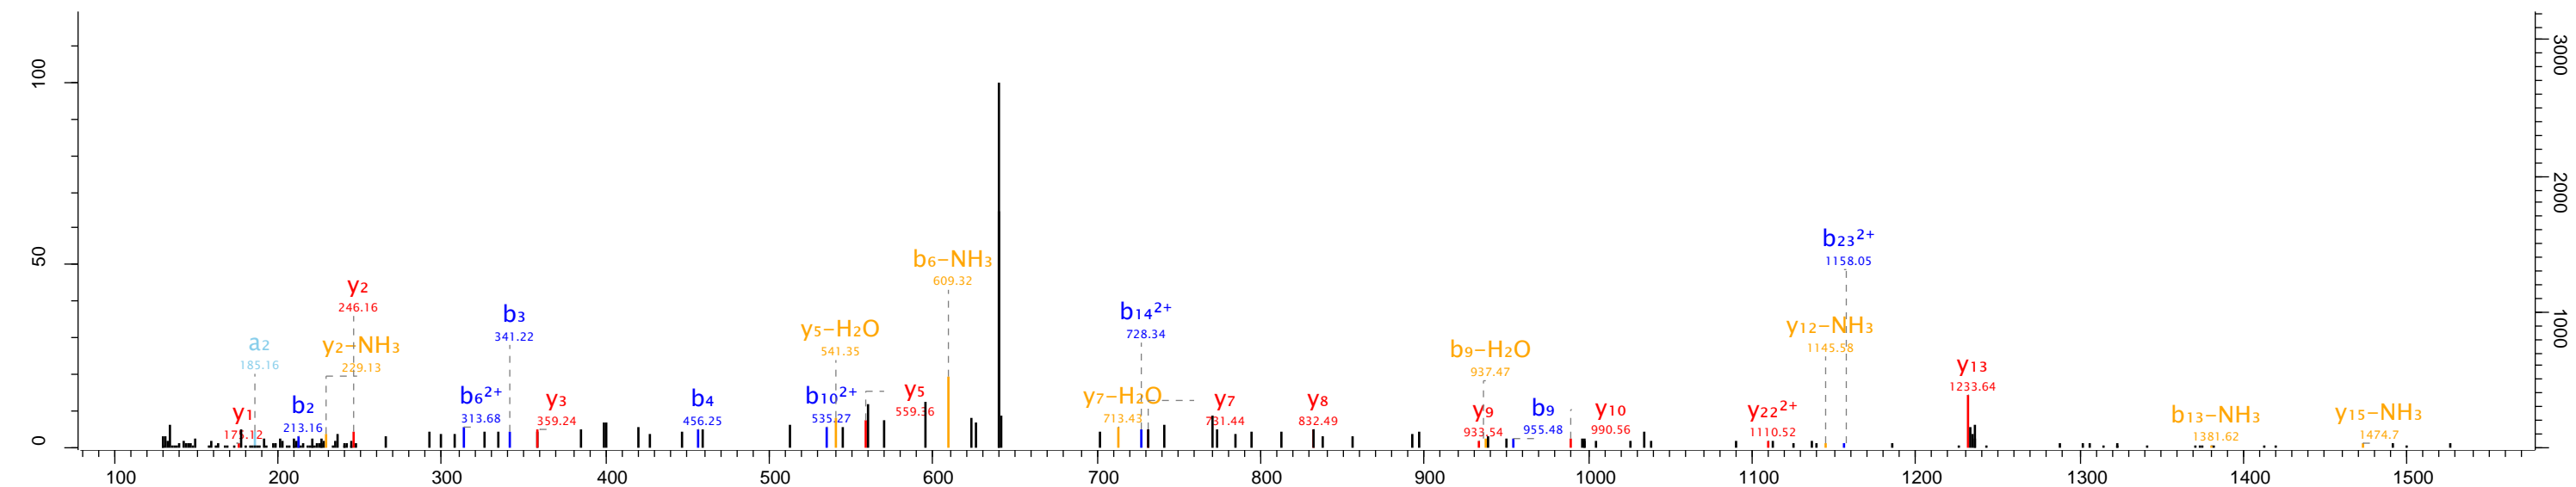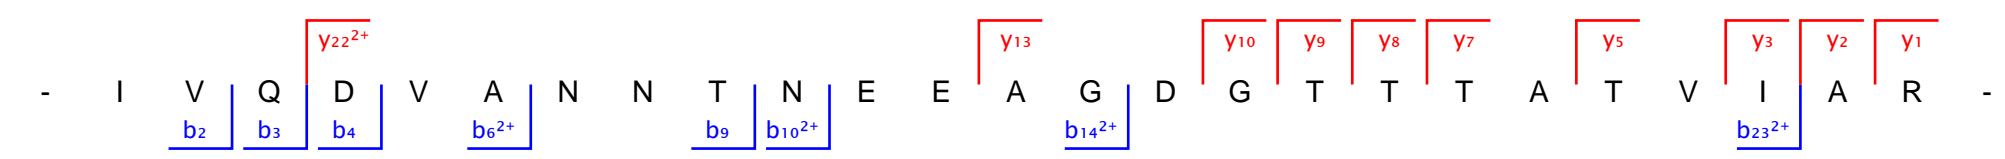

Spectral Annotation for Single-Peptide IDs between Single D11 Cells using Q-OT-LIT

Raw file 2015-01-08\_CL04\_Blastomere-15 Scan 52486 Method ITMS; HCD Score 36.32 m/z 641.32

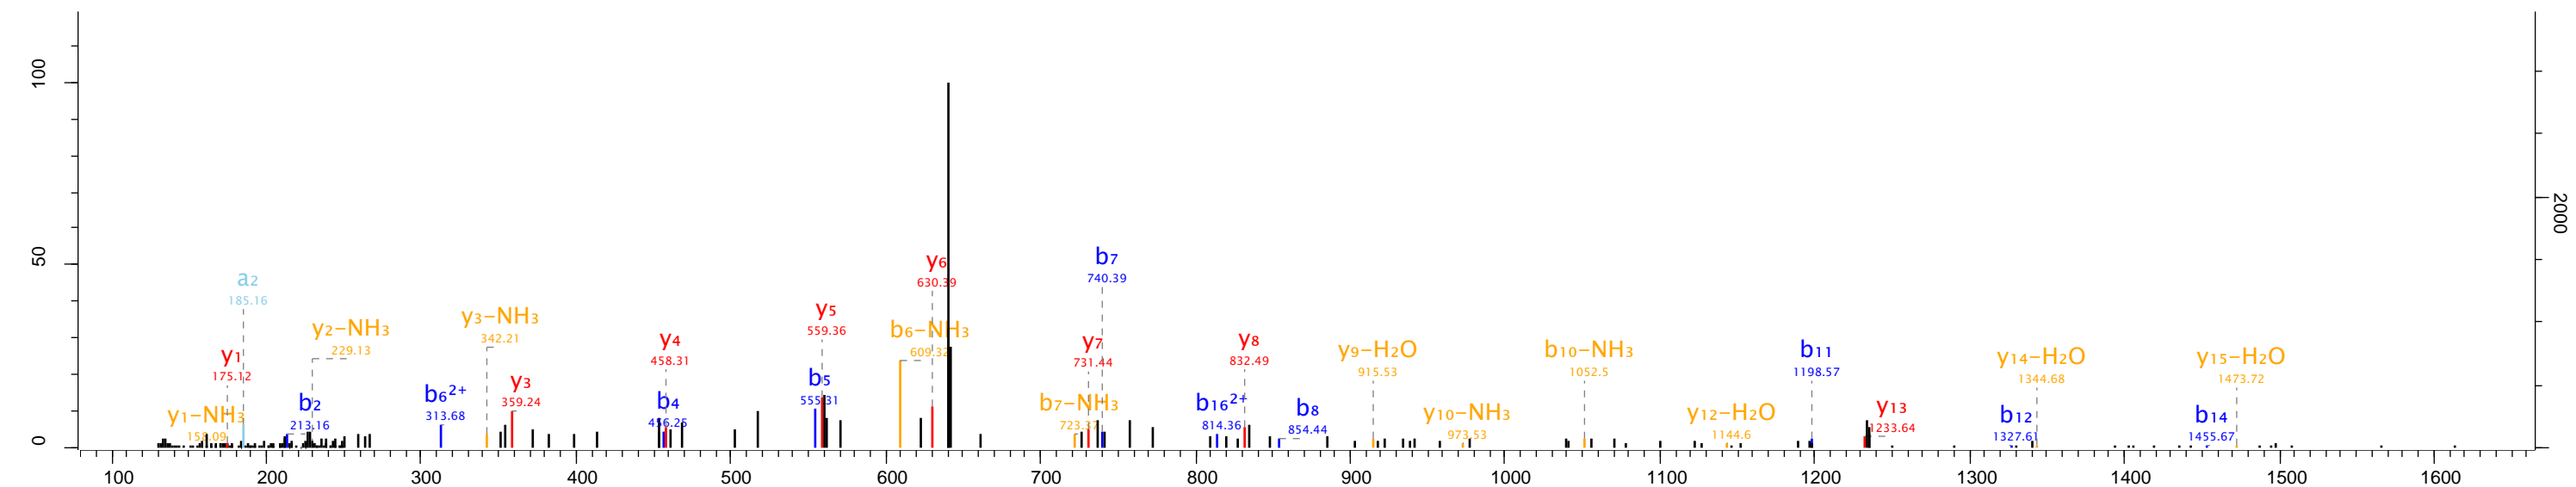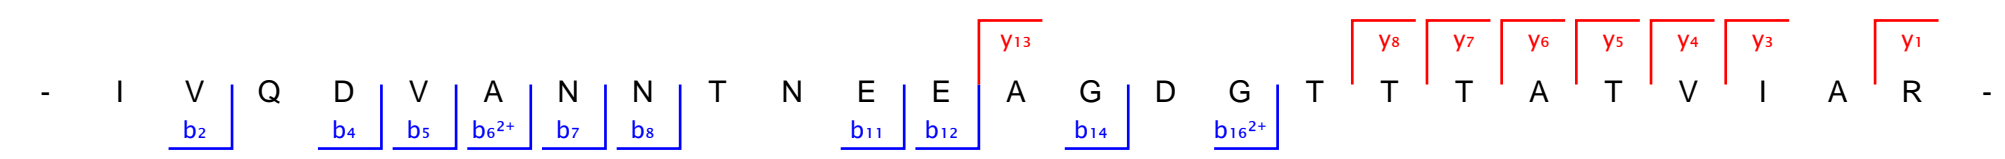

Spectral Annotation for Single-Peptide IDs between Single D11 Cells using Q-OT-LIT

Raw file: 2015-01-08\_CL04\_Blastomere-15  
 Scan: 52663 Method: ITMS; HCD Score: 36.74 m/z: 641.07

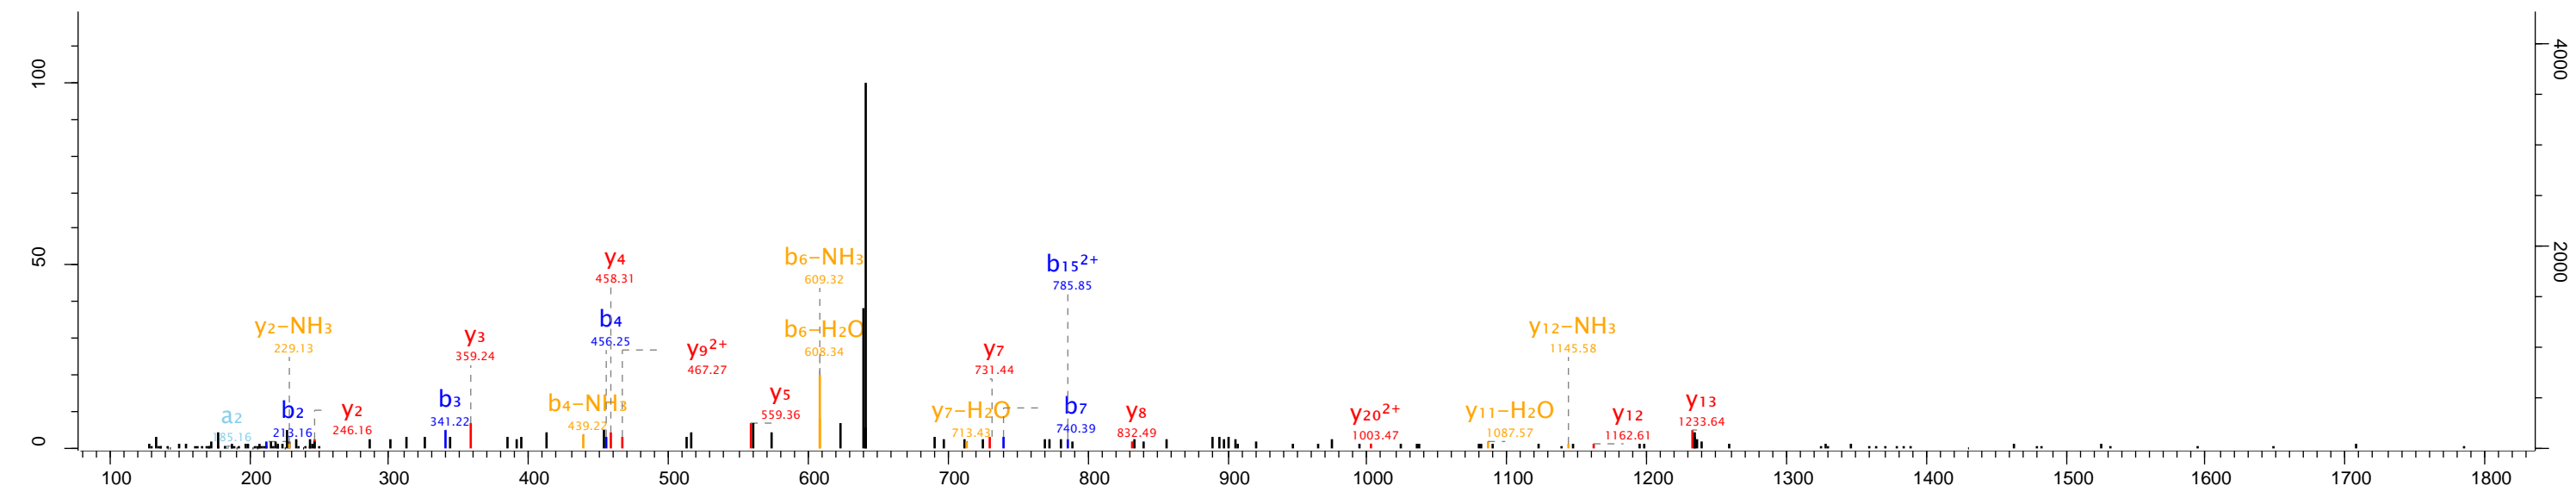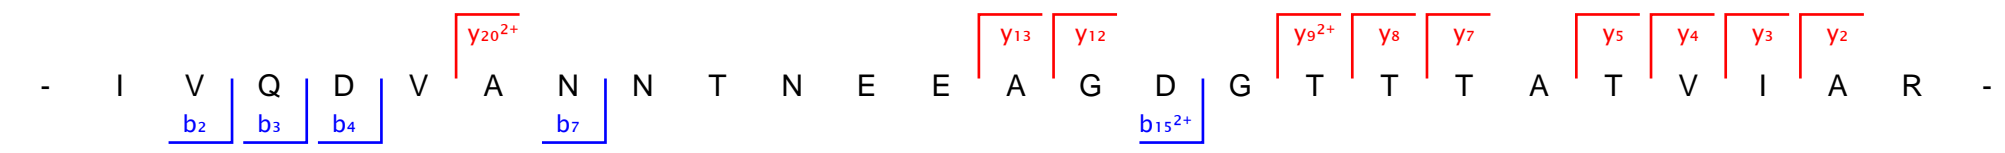

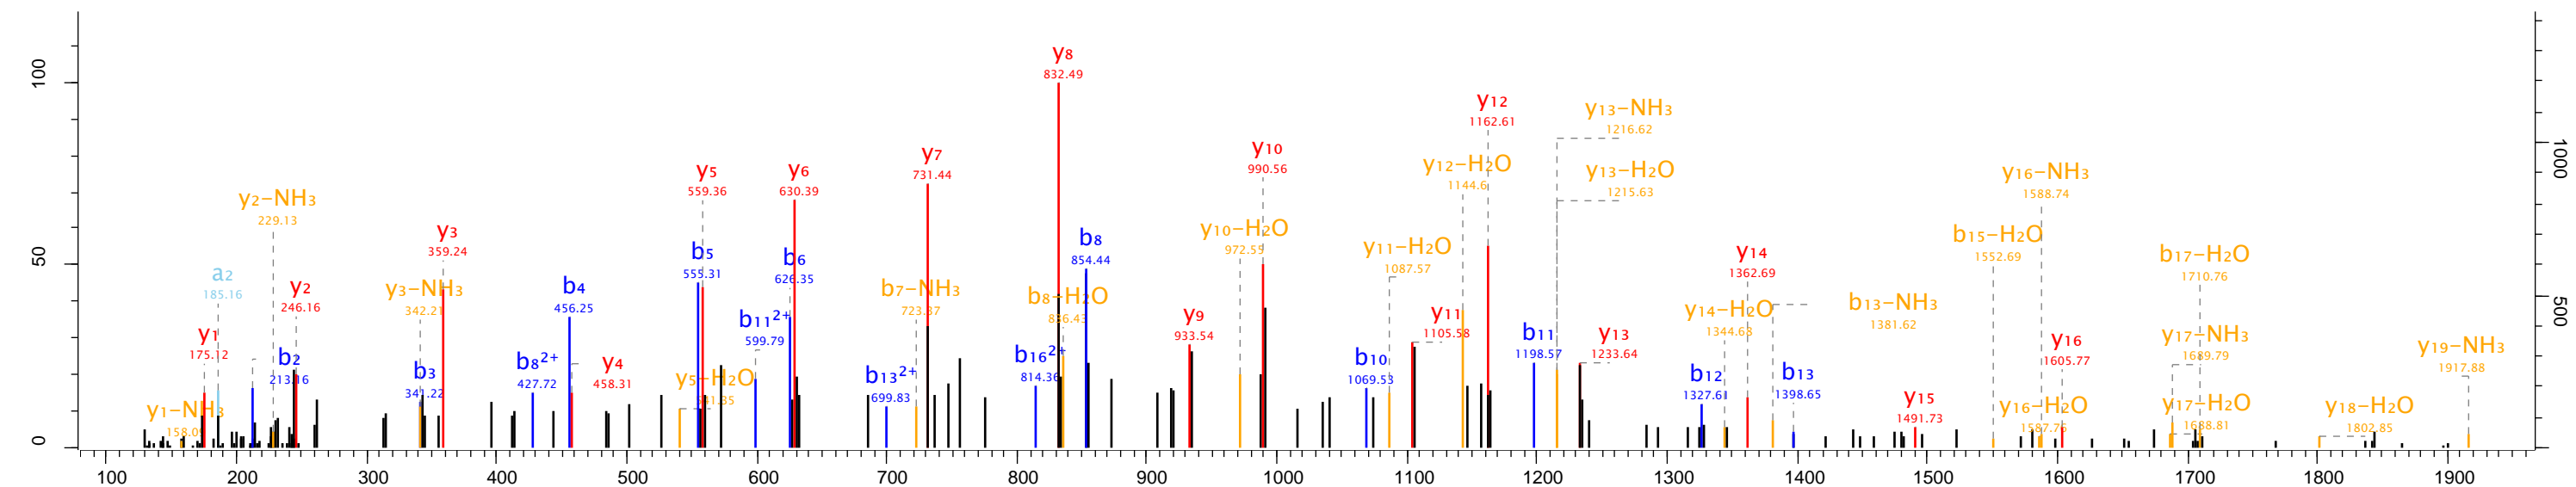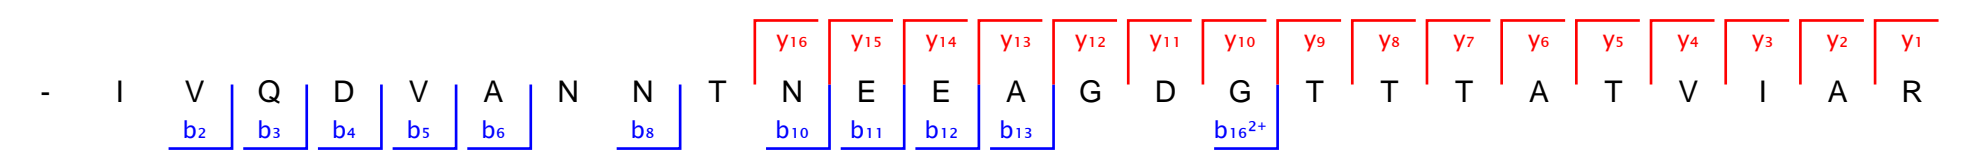

Raw file 2015-01-08\_CL04\_Blastomere-15 Scan 52679 Method ITMS; HCD Score 120.42 m/z 854.42

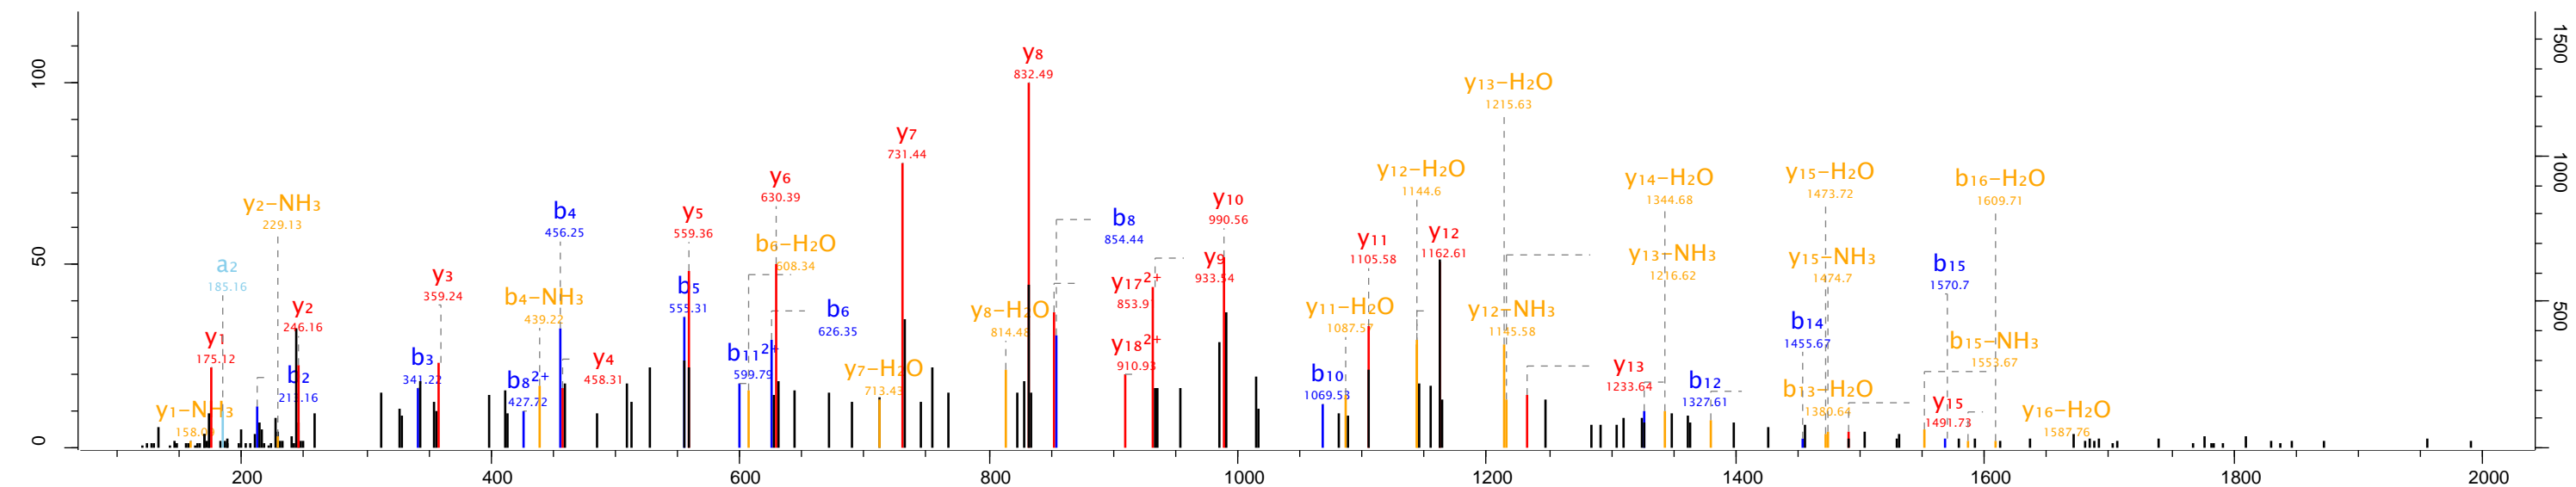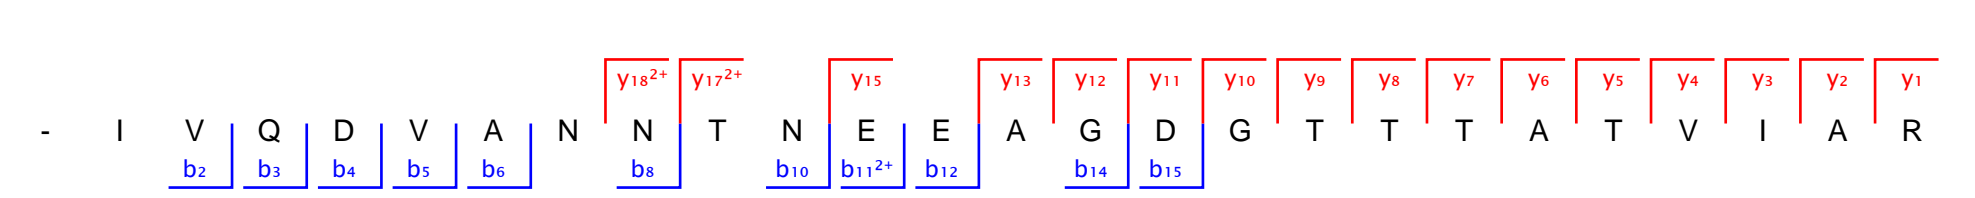

Spectral Annotation for Single-Peptide IDs between Single D11 Cells using Q-OT-LIT



Raw file 2015-01-08\_CL04\_Blastomere-15 Scan 52934 Method ITMS; HCD Score 93.21 m/z 854.42

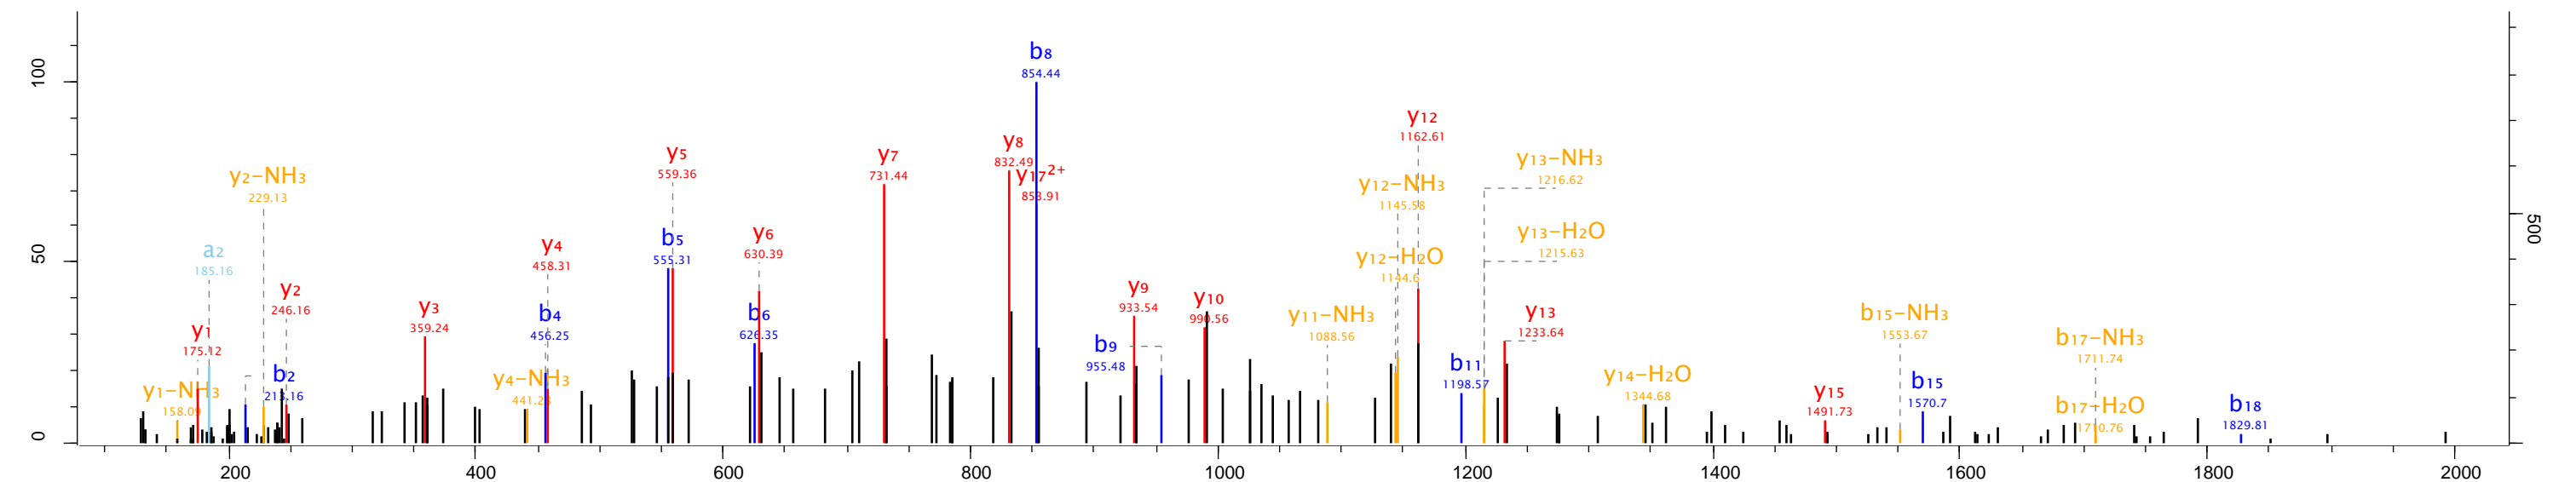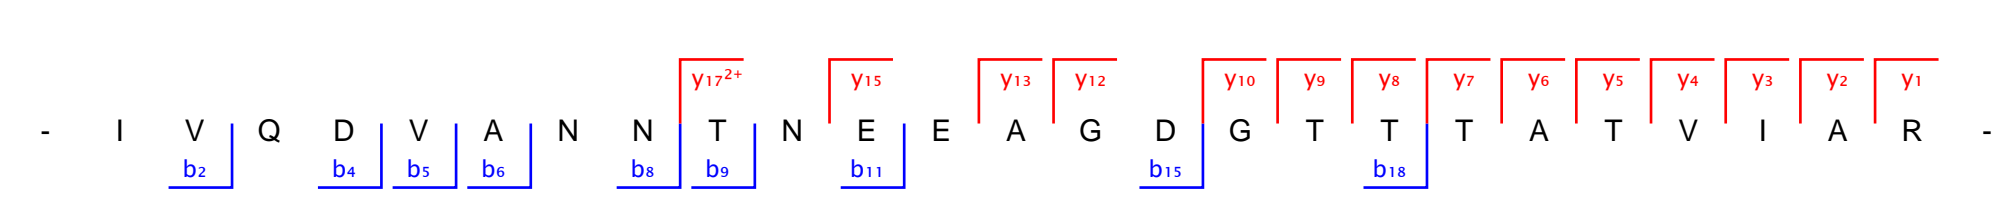

Raw file: 2015-01-08\_CL04\_Blastomere-15  
 Scan: 52949 Method: ITMS; HCD Score: 94.02 m/z: 854.42

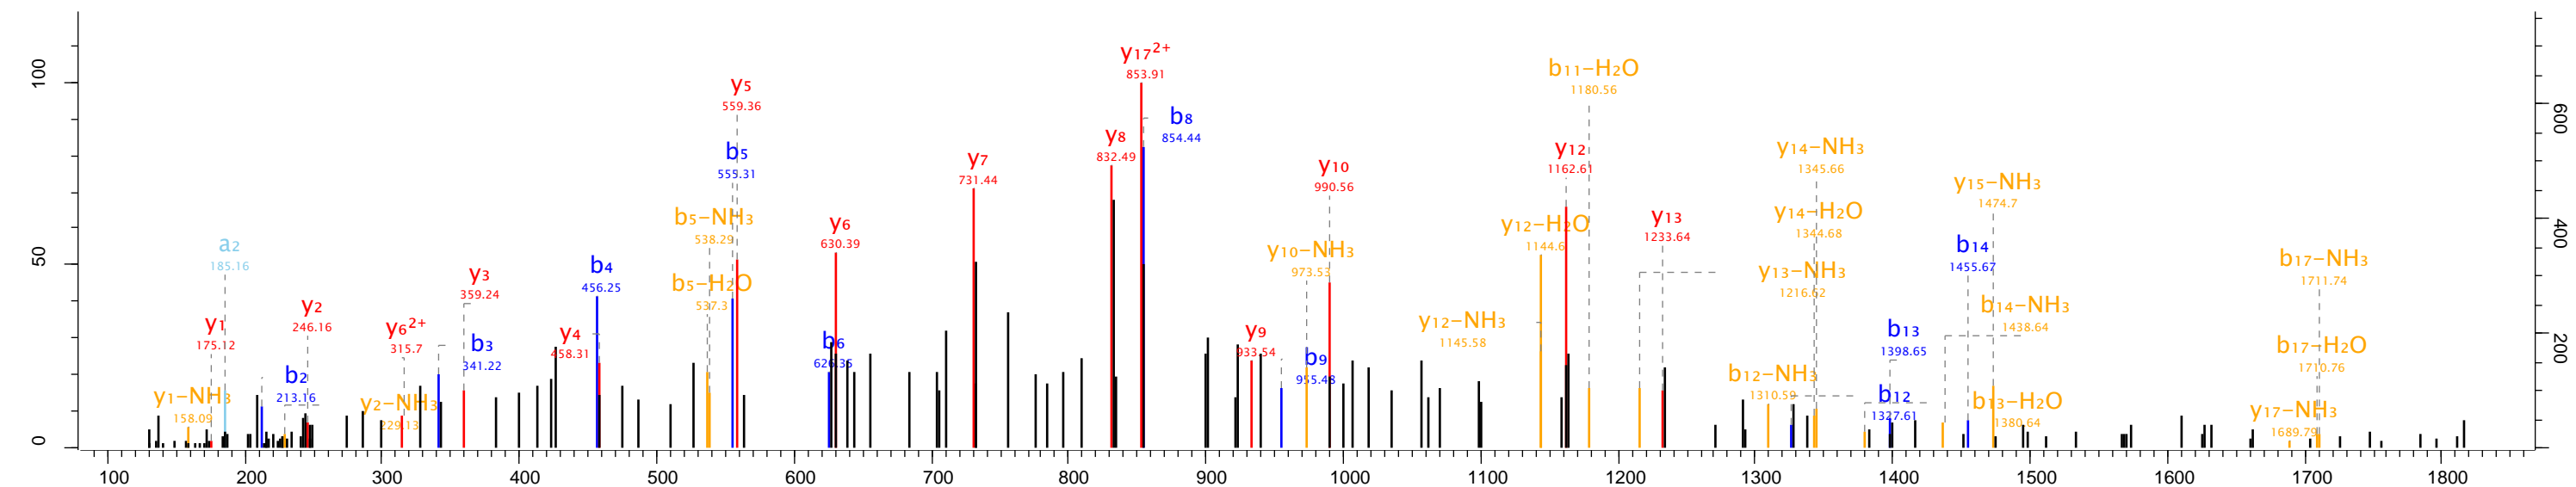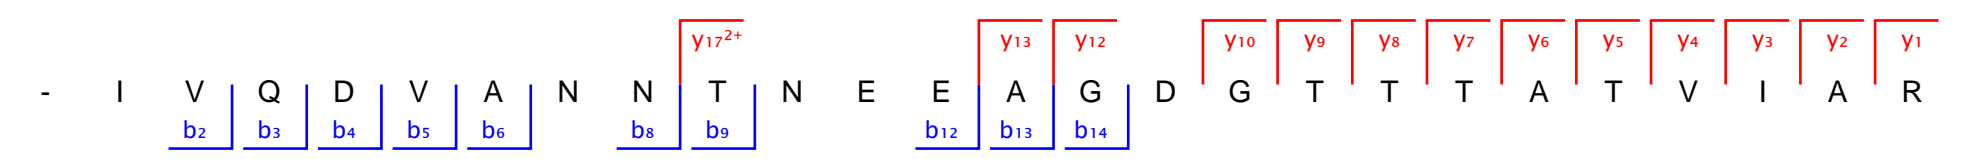

Raw file Scan Method Score m/z  
 2015-01-08\_CL04\_Blastomere-15 52963 ITMS; HCD 110.94 854.42

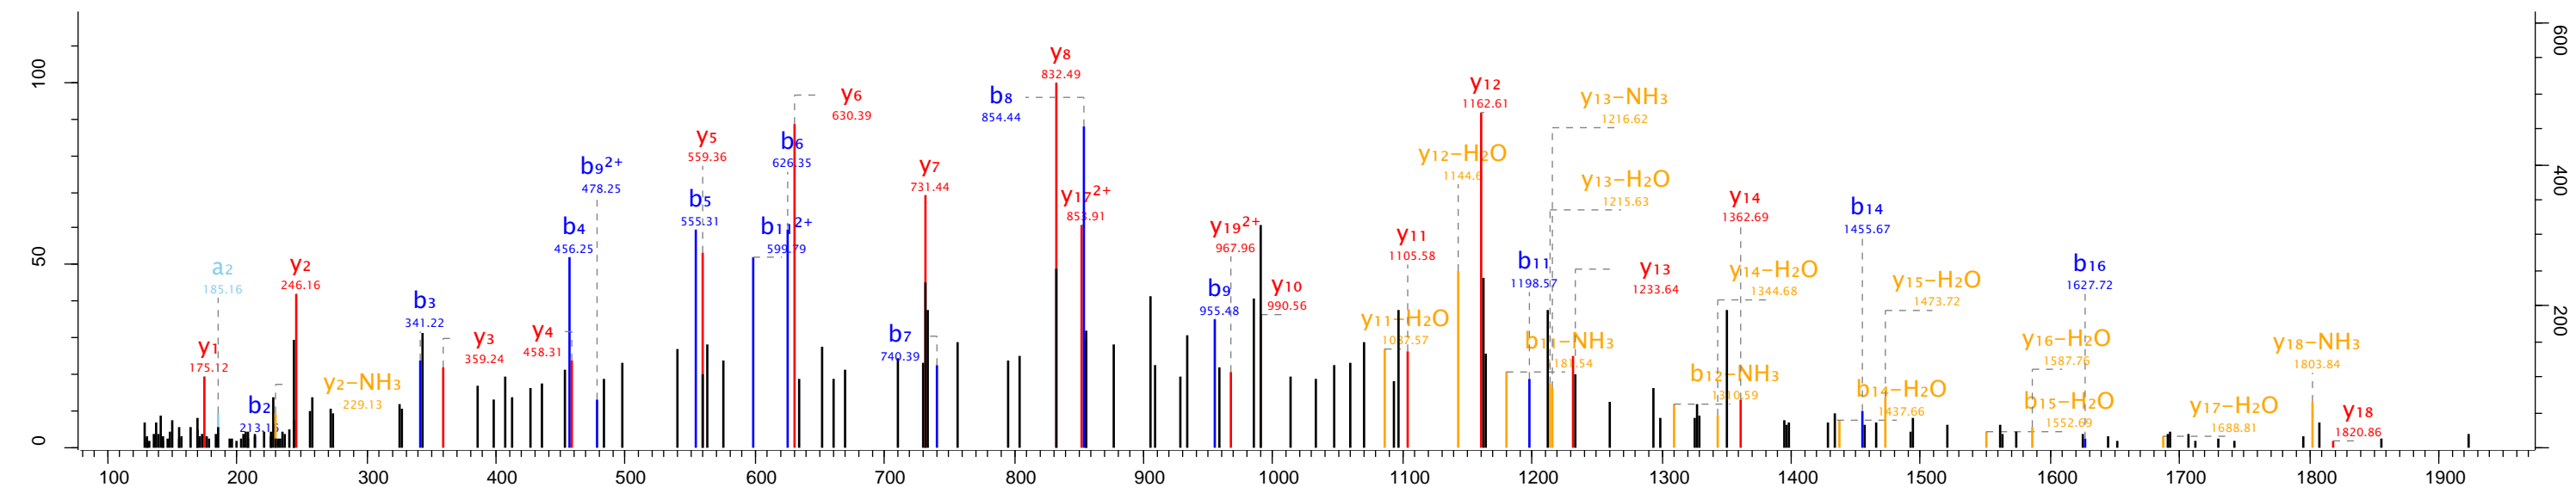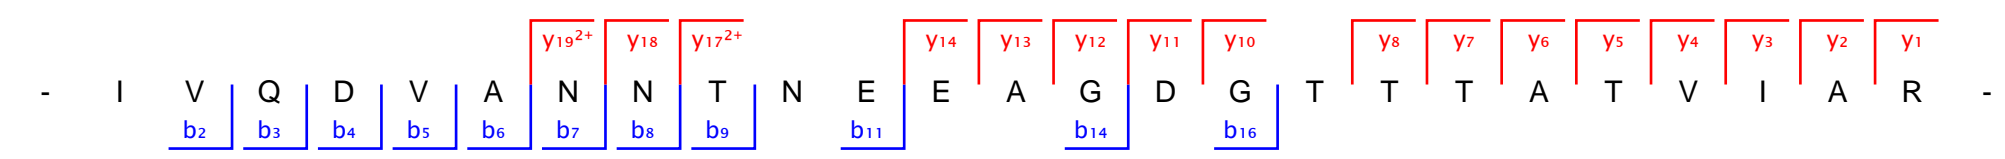

Spectral Annotation for Single-Peptide IDs between Single D11 Cells using Q-OT-LIT

Raw file 2015-01-08\_CL04\_Blastomere-15 Scan 53248 Method ITMS; HCD Score 72.3 m/z 854.08

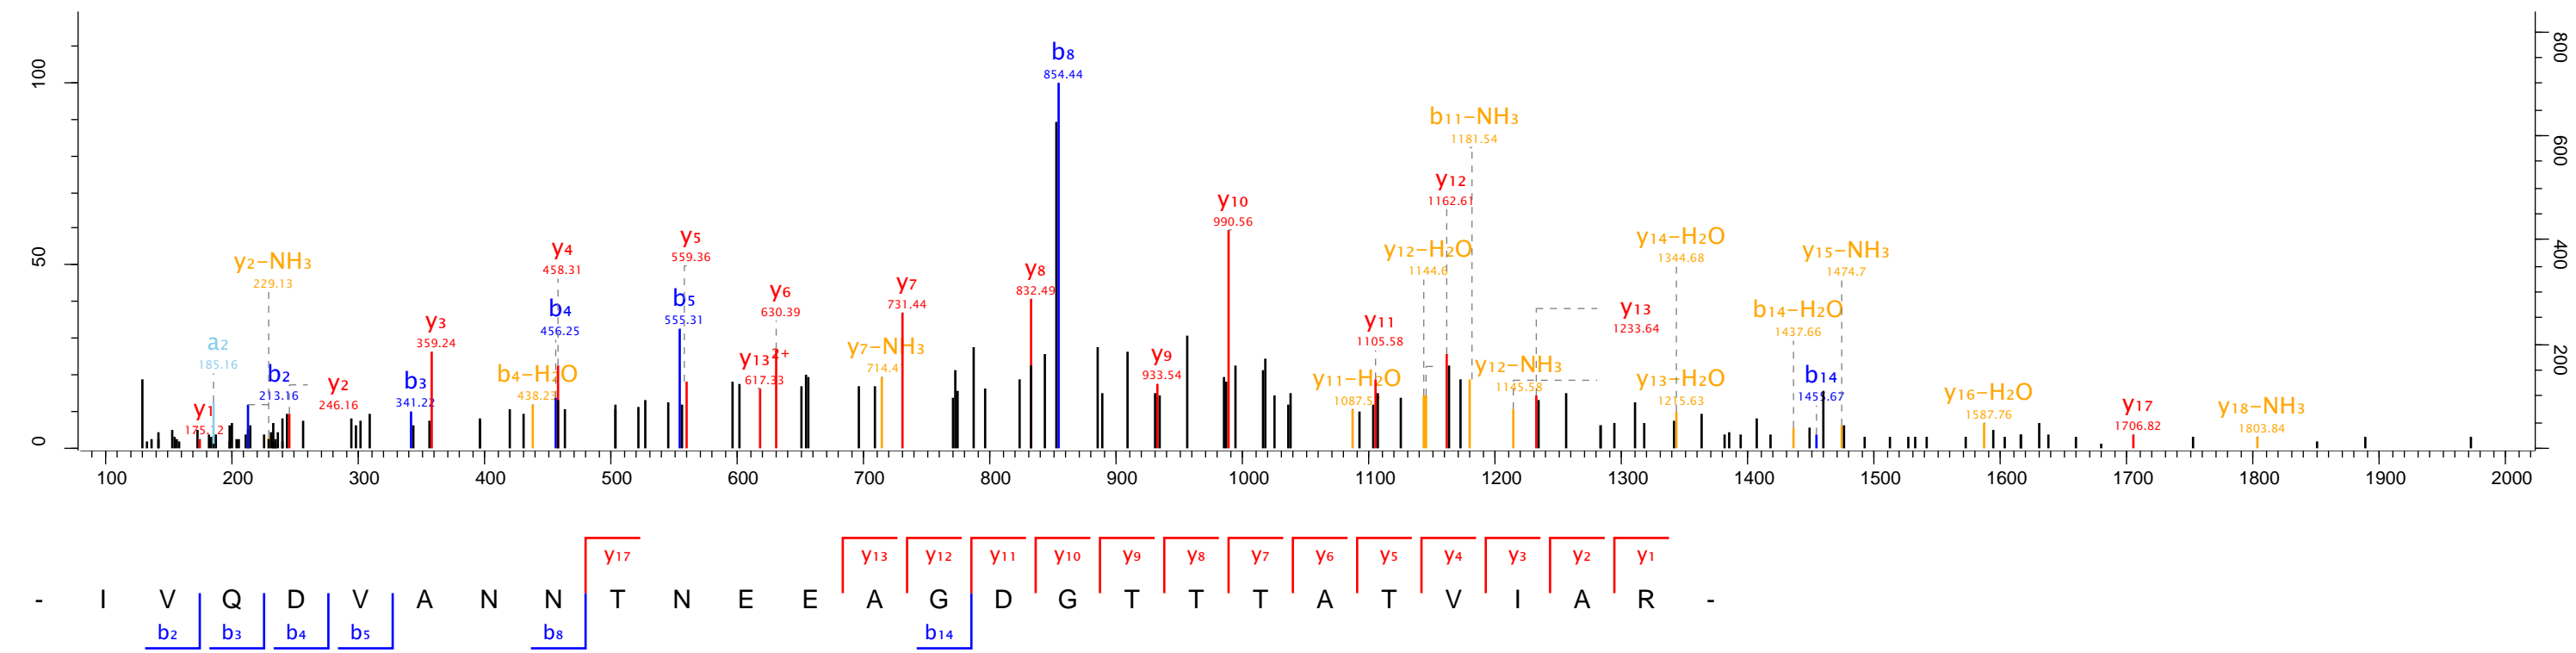

Spectral Annotation for Single-Peptide IDs between Single D11 Cells using Q-OT-LIT

2015-01-08\_CL04\_Blastomere-15

53375 ITMS; HCD 31.38 854.75

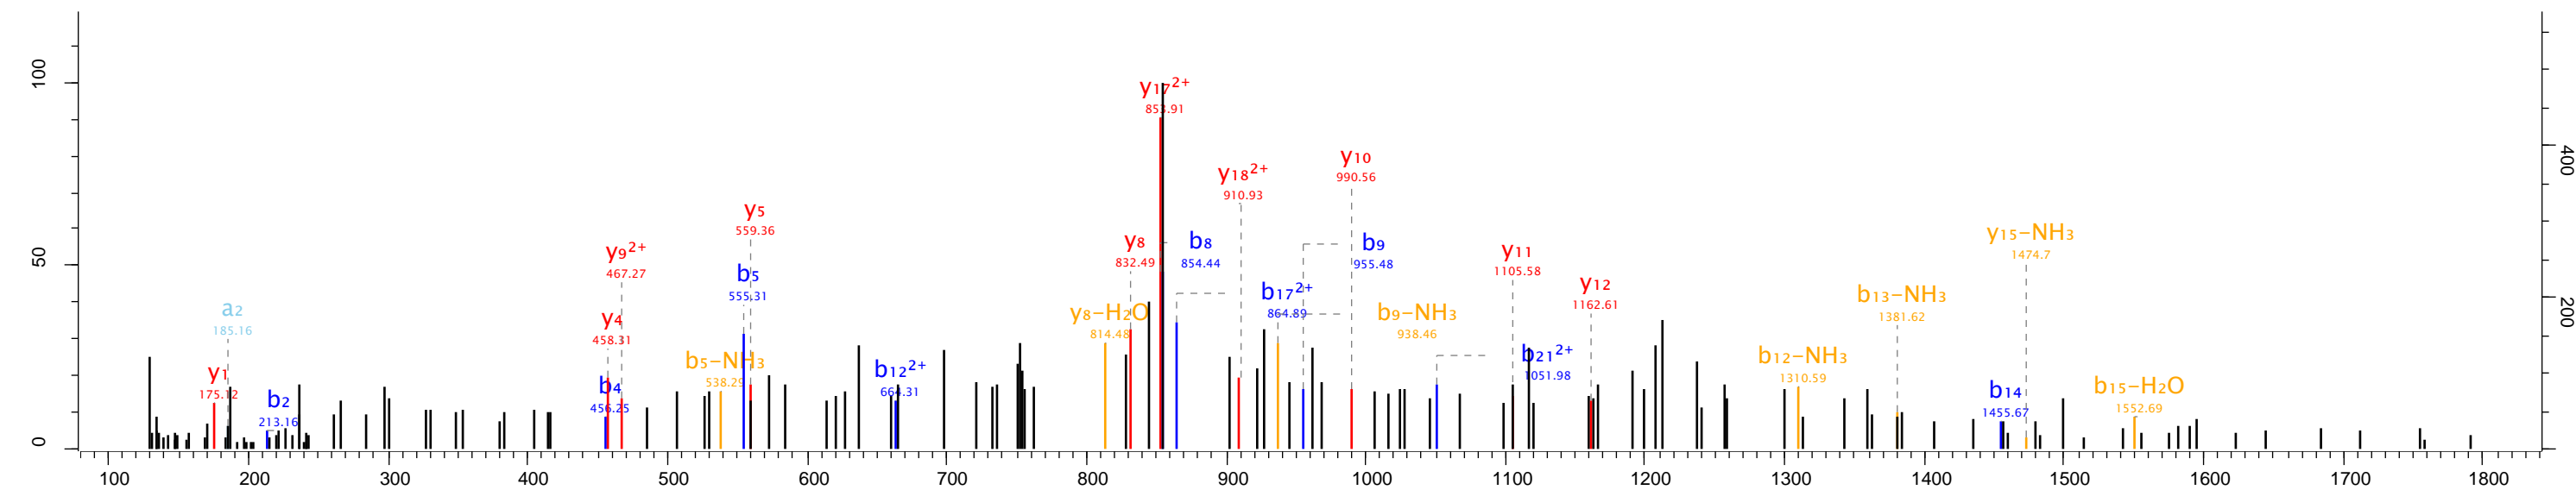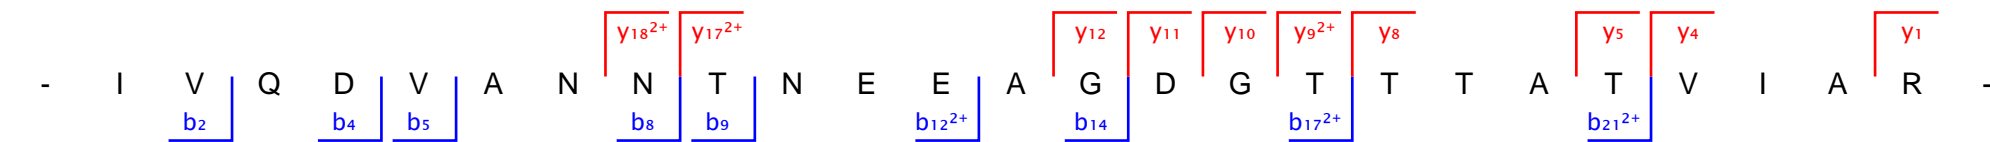

Raw file 2015-01-08\_CL04\_Blastomere-15 Scan 55481 Method ITMS; HCD Score 93.56 m/z 584.41

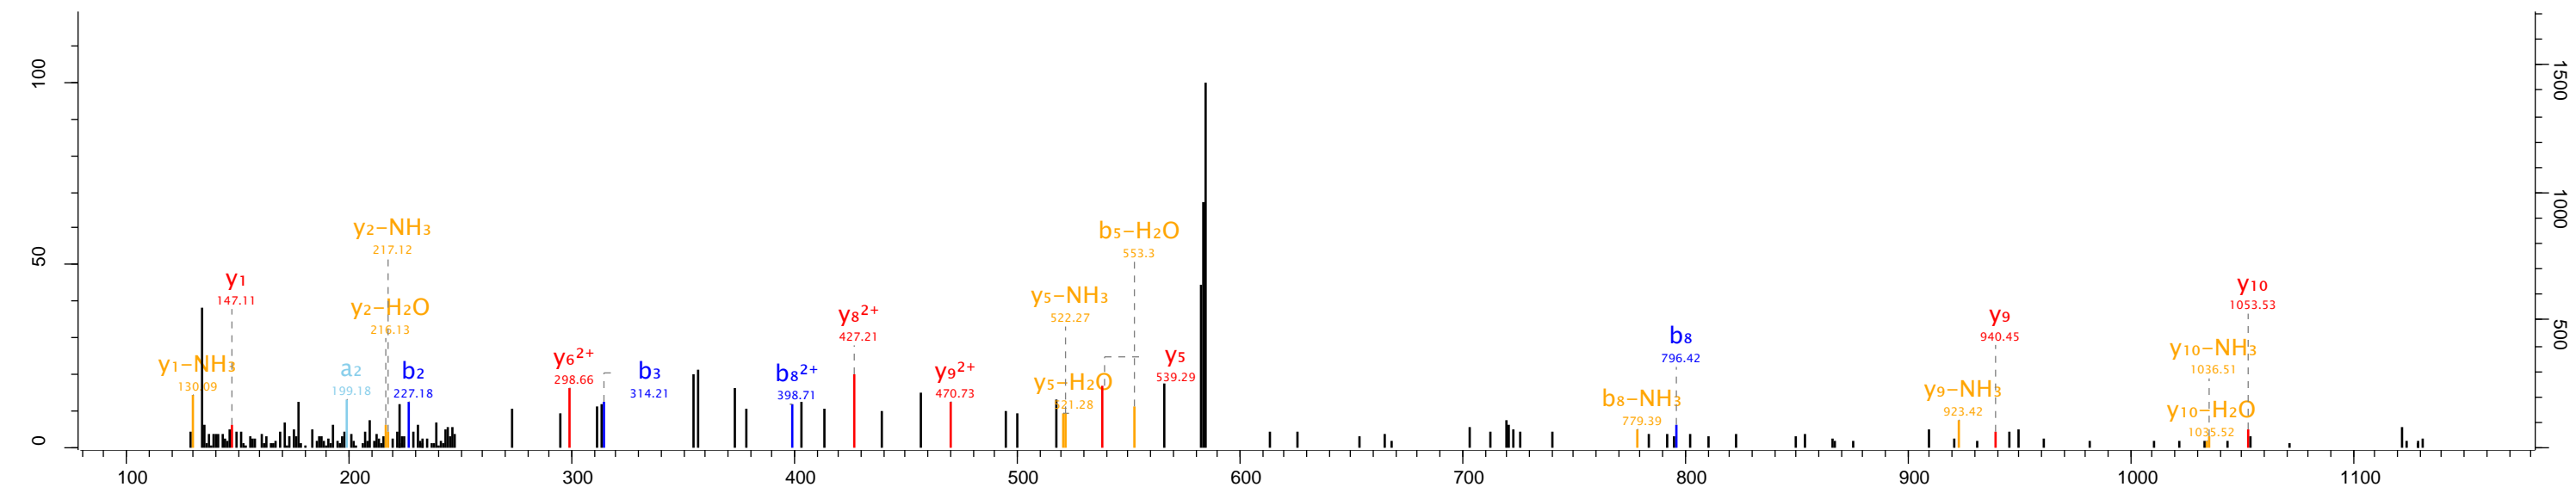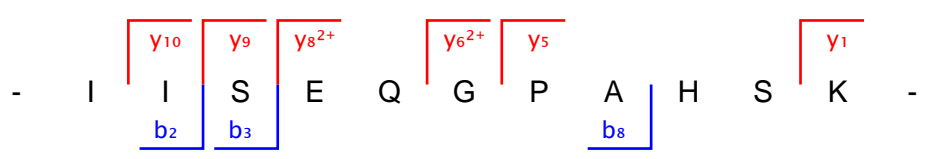

Spectral Annotation for Single-Peptide IDs between Single D11 Cells using Q-OT-LIT

Raw file 2015-01-08\_CL04\_Blastomere-15 Scan 55740 Method ITMS; HCD Score 40.62 m/z 792.06

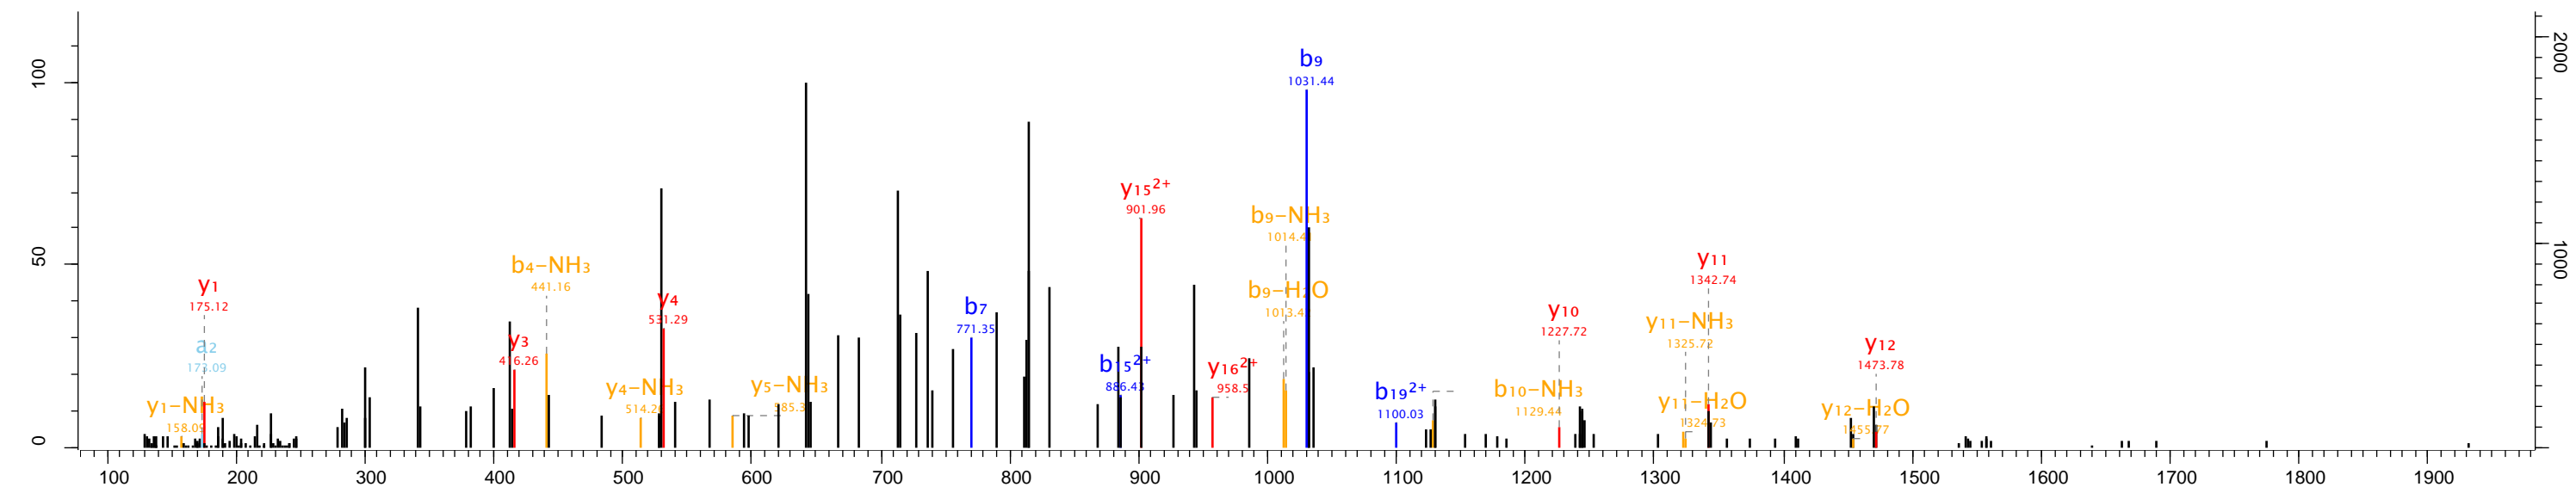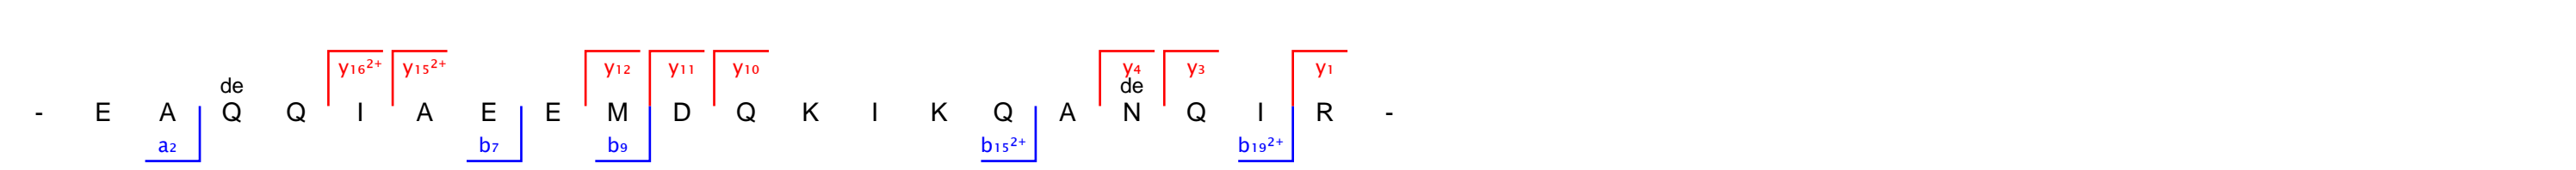

Spectral Annotation for Single-Peptide IDs between Single D11 Cells using Q-OT-LIT

Raw file  
 2015-01-08\_CL04\_Blastomere-15  
 Scan 56060 Method ITMS; HCD Score 45.68 m/z 496.76

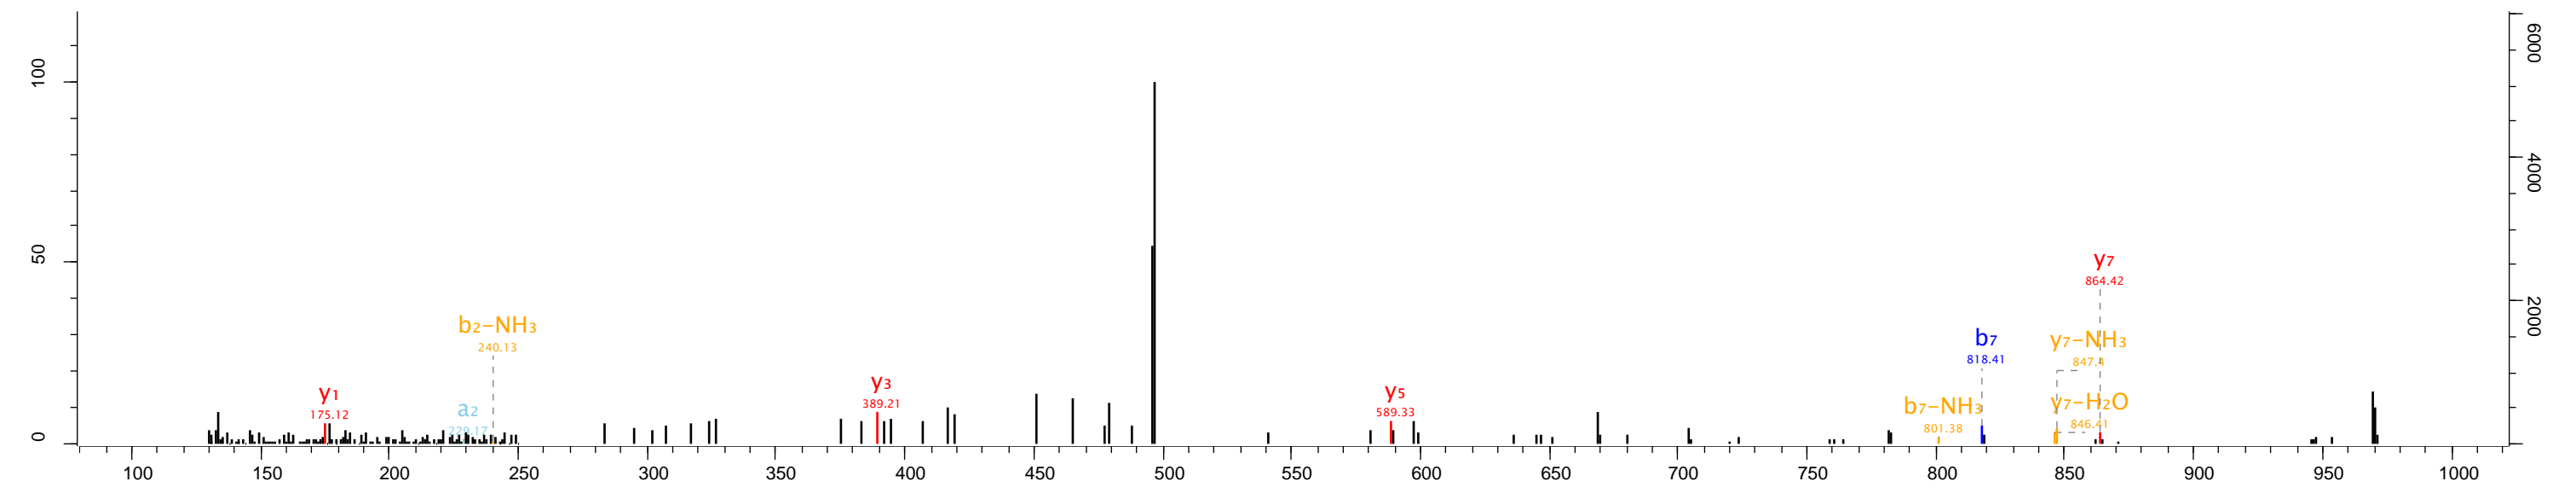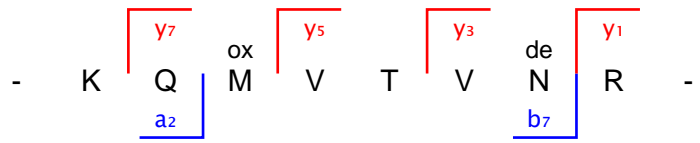



Raw file 2015-01-08\_CL04\_Blastomere-15 Scan 56069 Method ITMS; HCD Score 42.6 m/z 496.76

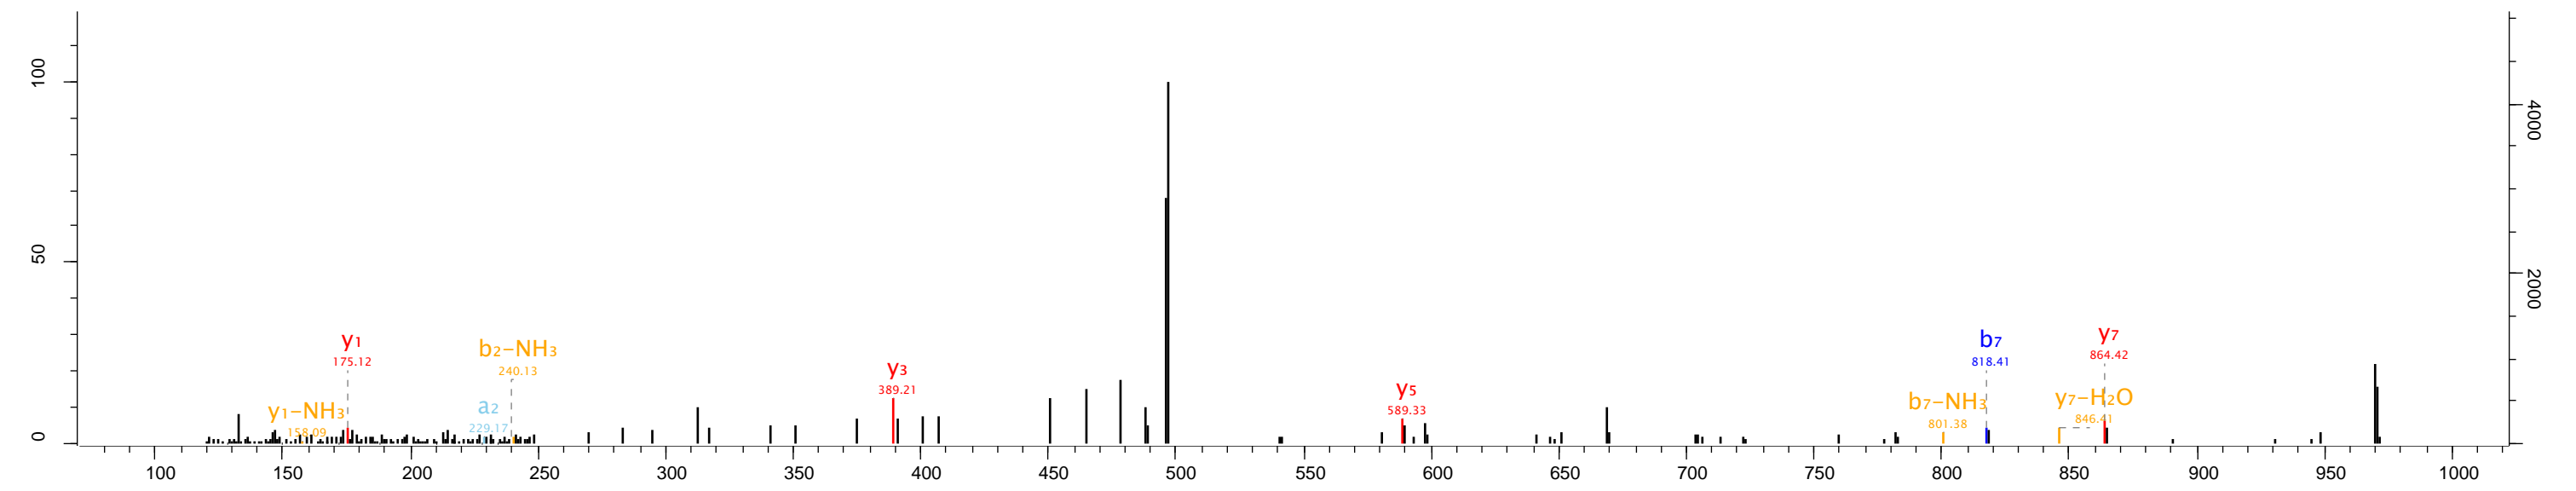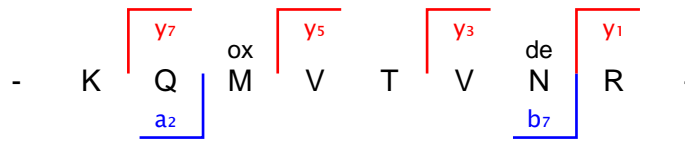

Spectral Annotation for Single-Peptide IDs between Single D11 Cells using Q-OT-LIT

Raw file  
 2015-01-08\_CL04\_Blastomere-15  
 Scan 56814 Method ITMS; HCD Score 51.23 m/z 792.06

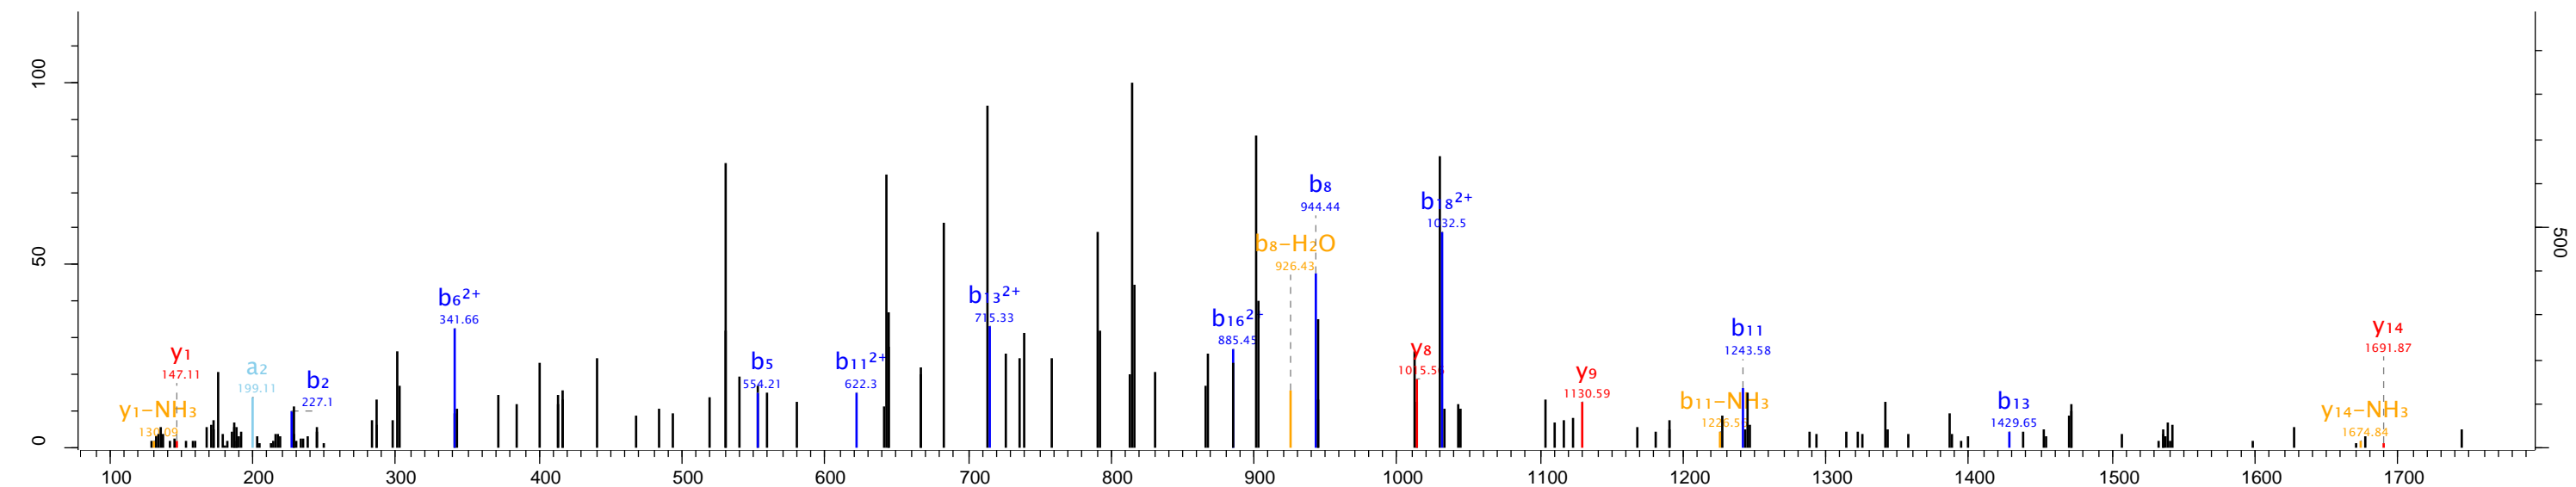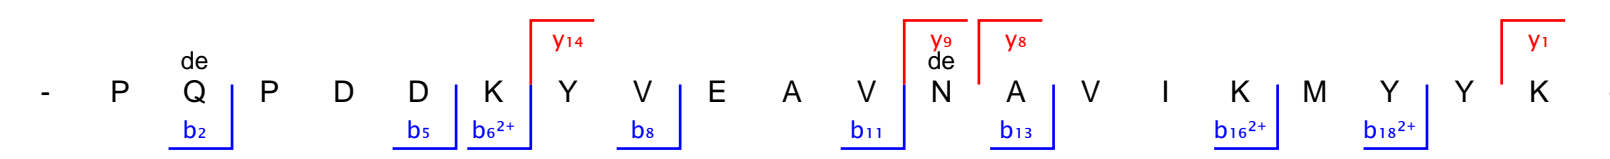

Spectral Annotation for Single-Peptide IDs between Single D11 Cells using Q-OT-LIT
