# Supplementary material
Source: PubMed Central journal article supplement (PMC4974349)
Supplement: 10.1074_M115.057760_mcp.M115.057760-4.pdf [file 10.1074_M115.057760_mcp.M115.057760-4.pdf]

Raw file 2015-01-05\_CL02\_2Excl15sMaxInj70 Scan 3250 Method ITMS; HCD Score 86.51 m/z 483.78

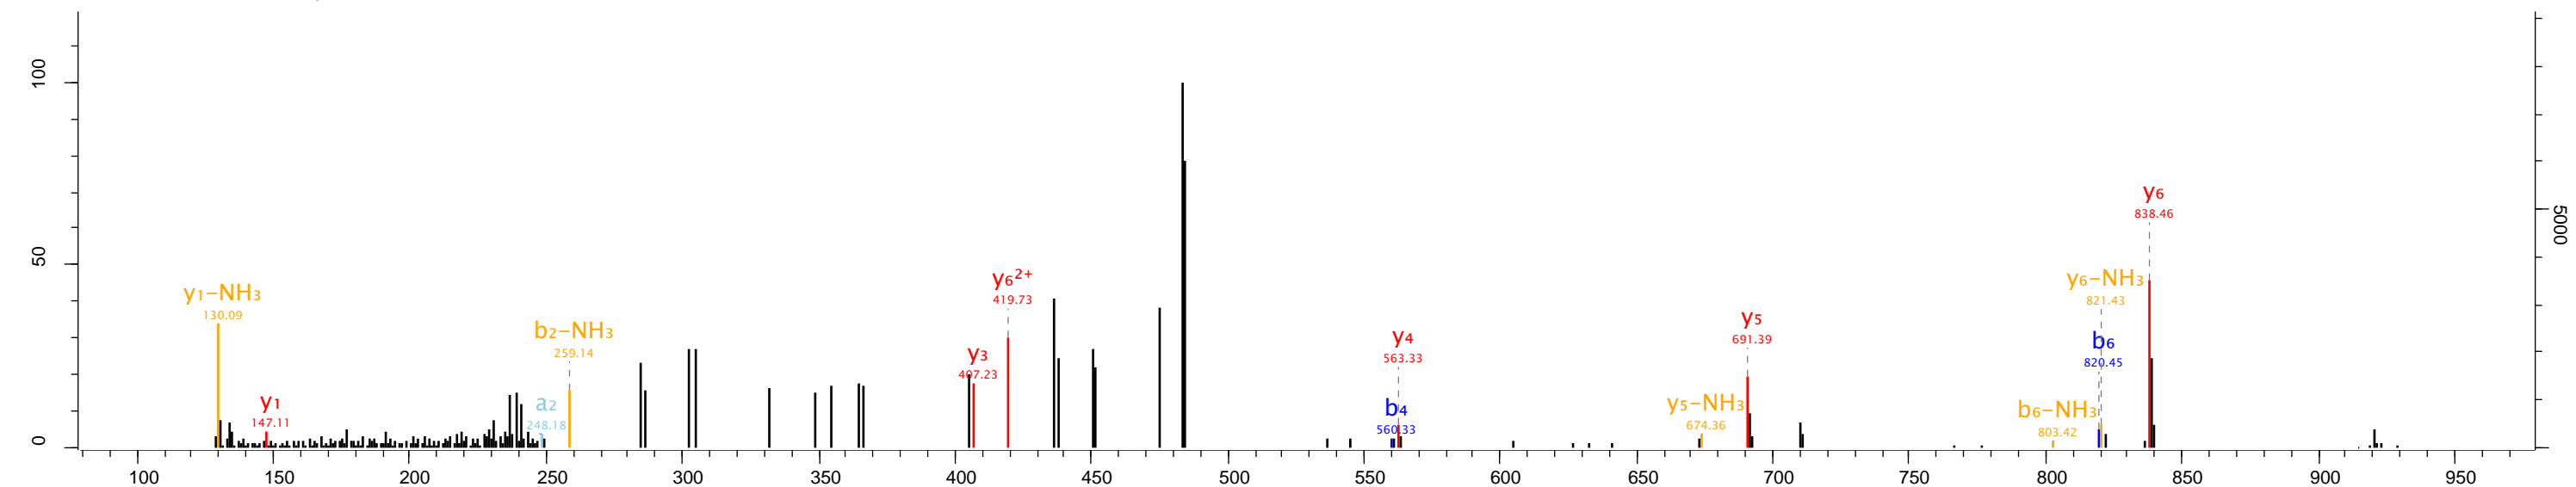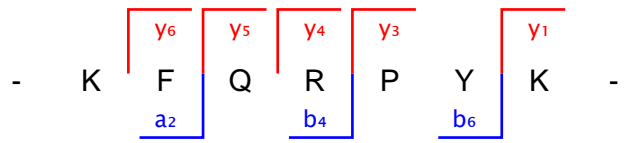

Raw file: 2015-01-05\_CL02\_2Excl15sMaxInj70  
 Scan: 3261 Method: ITMS; HCD Score: 109.7 m/z: 483.78

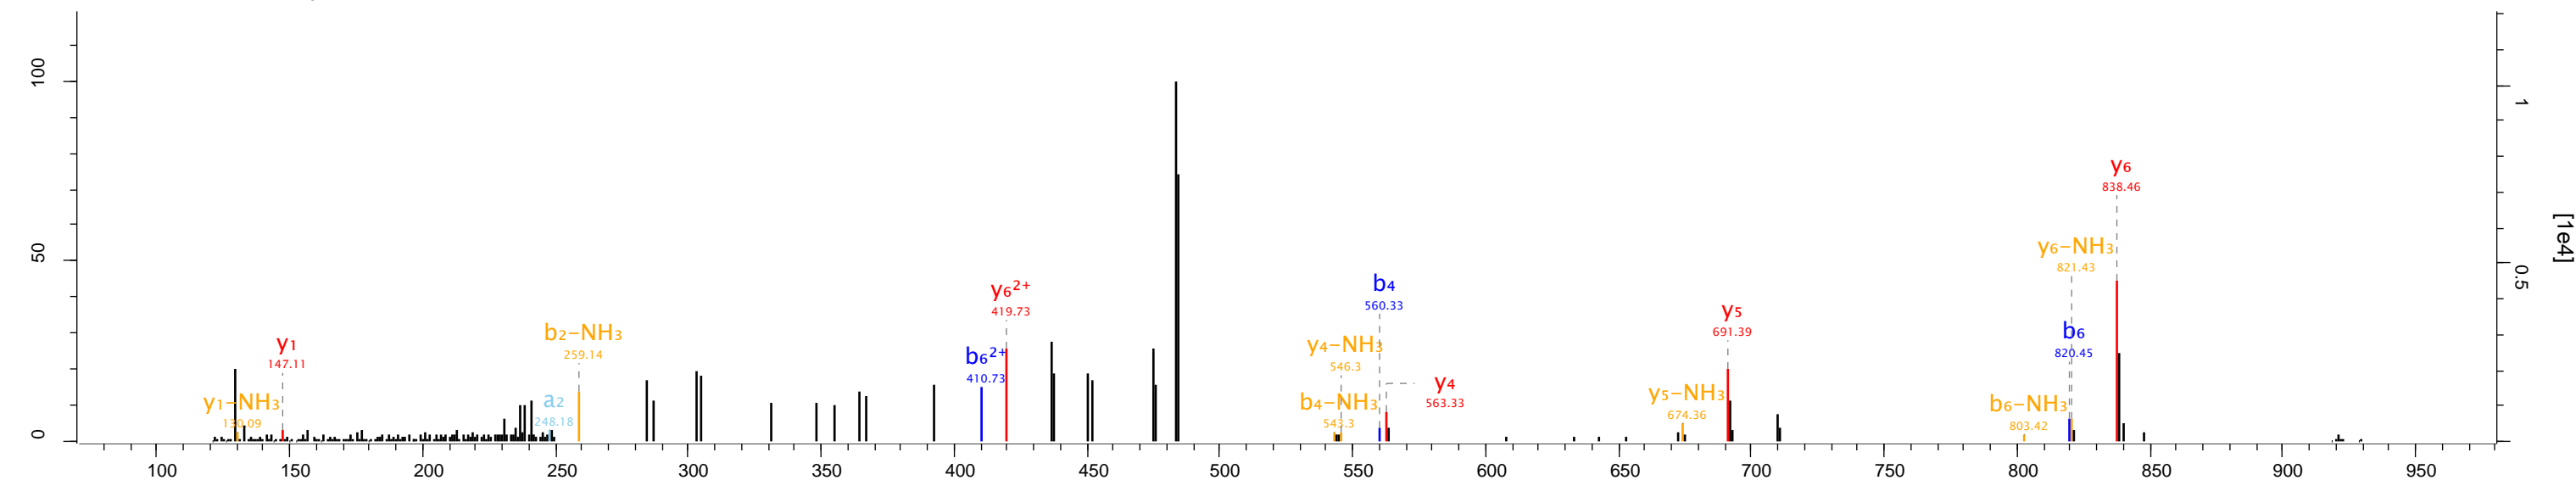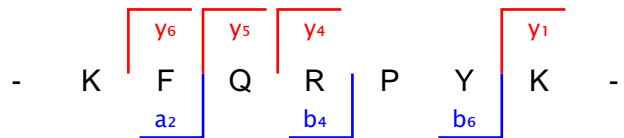

Raw file 2015-01-05\_CL02\_2Excl15sMaxInj70 Scan 3450 Method ITMS; HCD Score 94.16 m/z 483.78

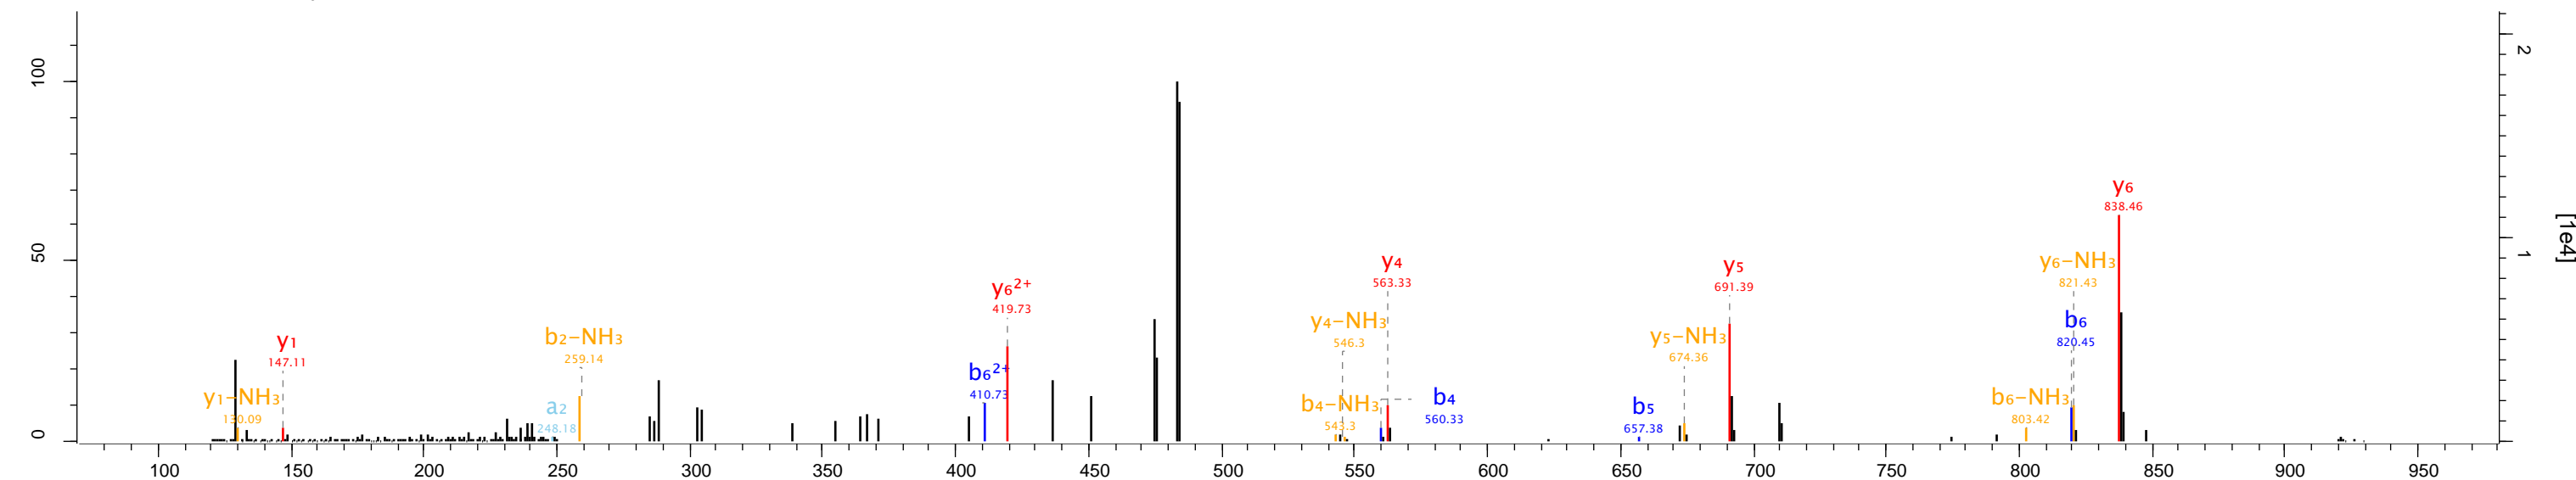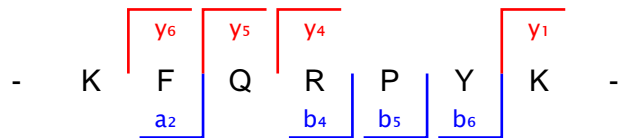

Raw file 2015-01-05\_CL02\_2Excl15sMaxInj70 Scan 3455 Method ITMS; HCD Score 114.59 m/z 483.78

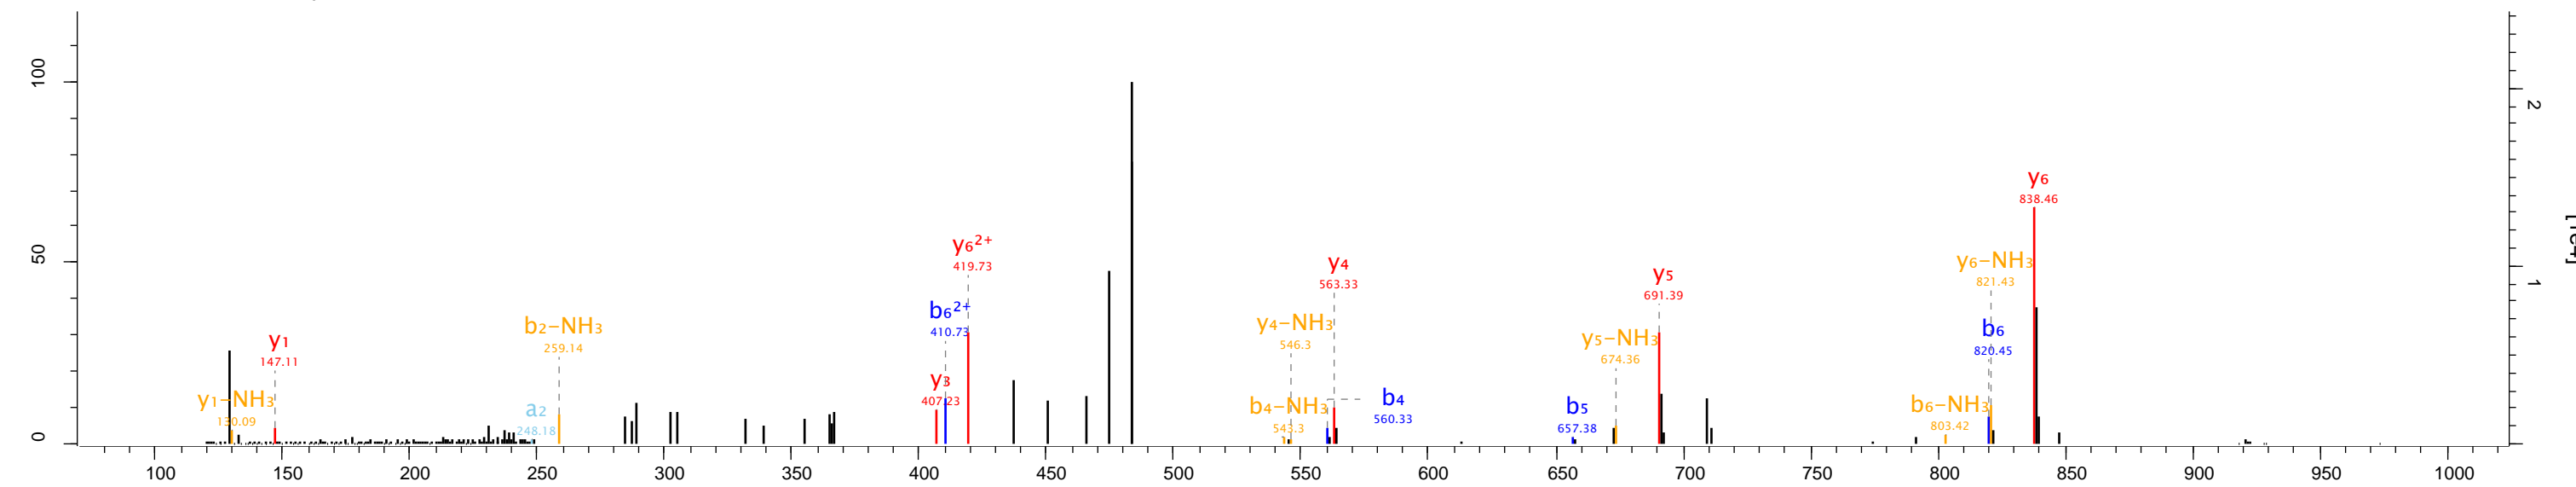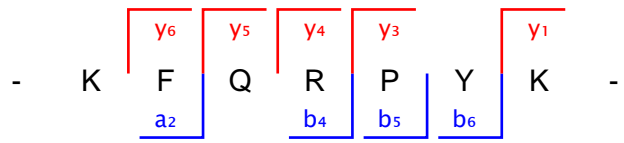

Spectral Annotation for Single-Peptide IDs in 16-cell Embryo using Q-OT-LIT

Raw file 2015-01-05\_CL02\_2Excl15sMaxInj70 Scan 3461 Method ITMS; HCD Score 114.59 m/z 483.78

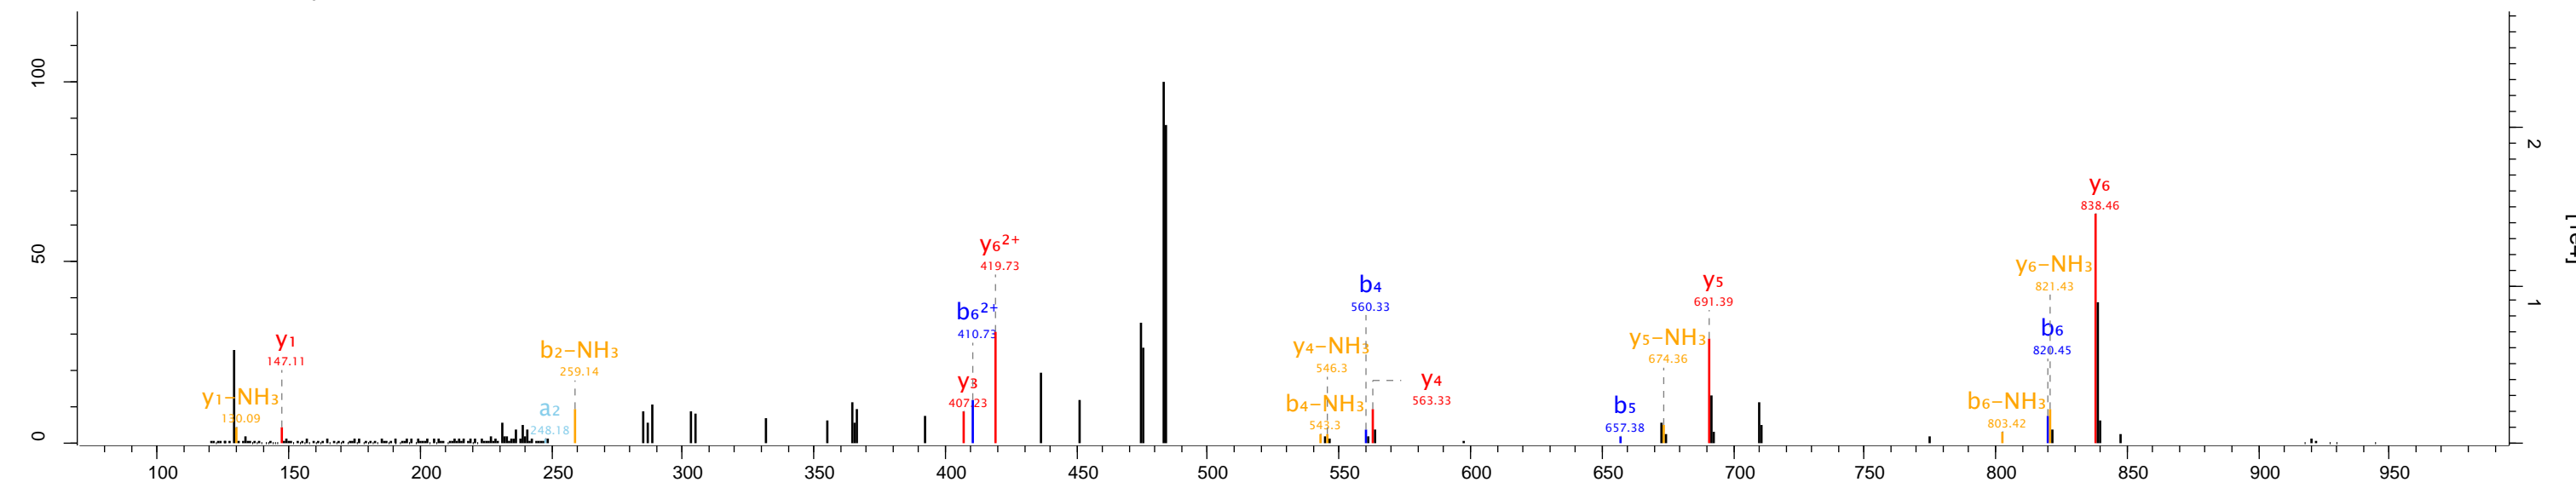

Raw file 2015-01-05\_CL02\_2Excl15sMaxInj70 Scan 4565 Method ITMS; HCD Score 50.79 m/z 385.88

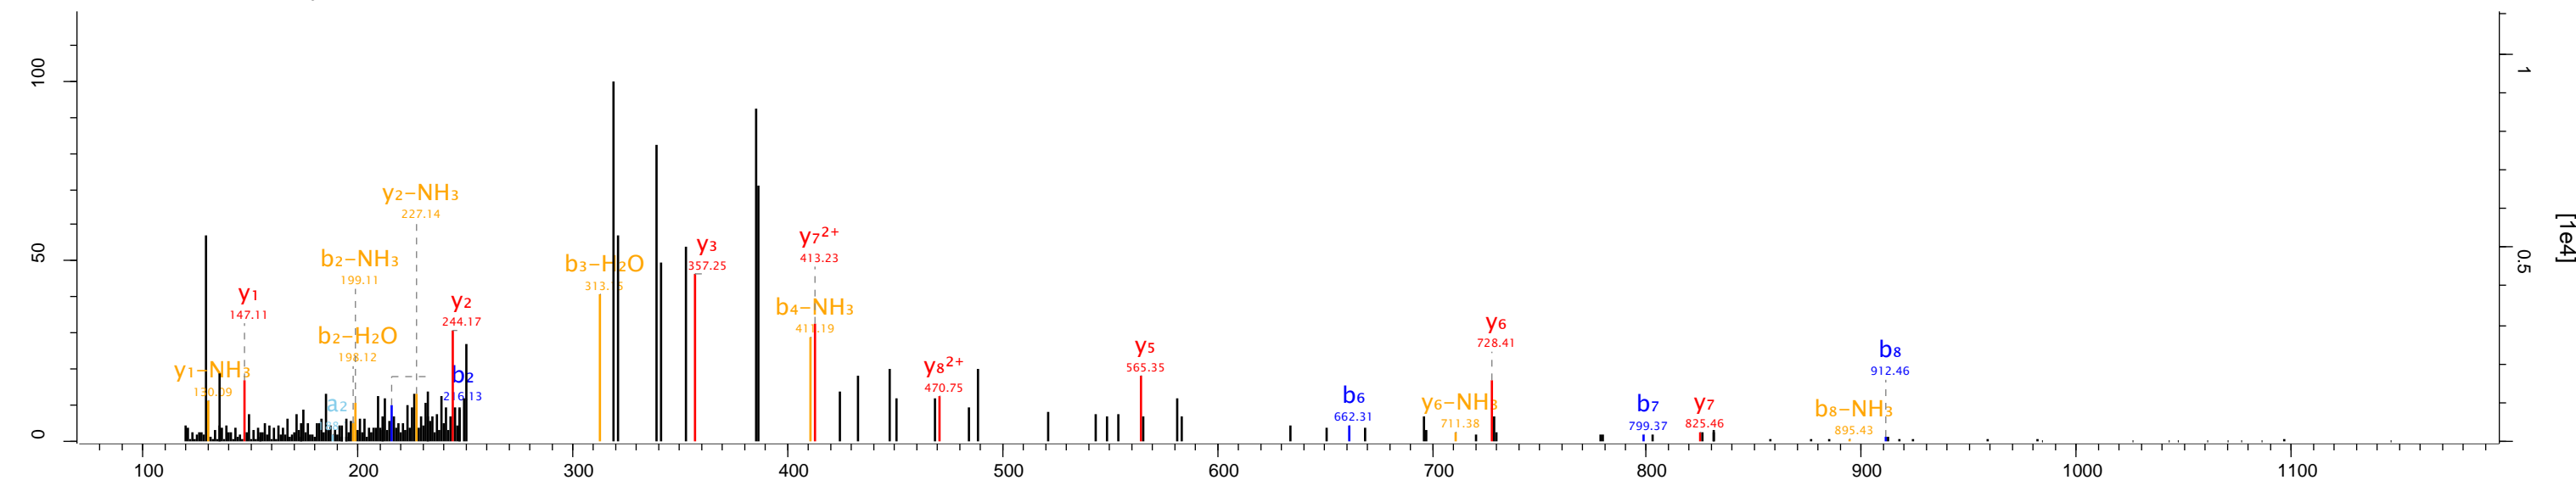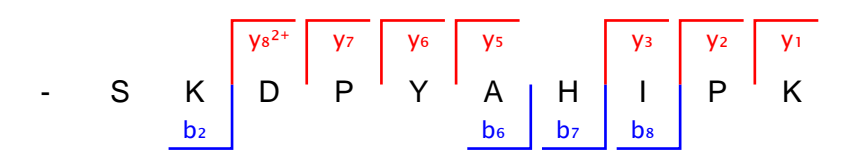

Raw file 2015-01-05\_CL02\_2Excl15sMaxInj70 Scan 5149 Method ITMS; HCD Score 126.03 m/z 411.57

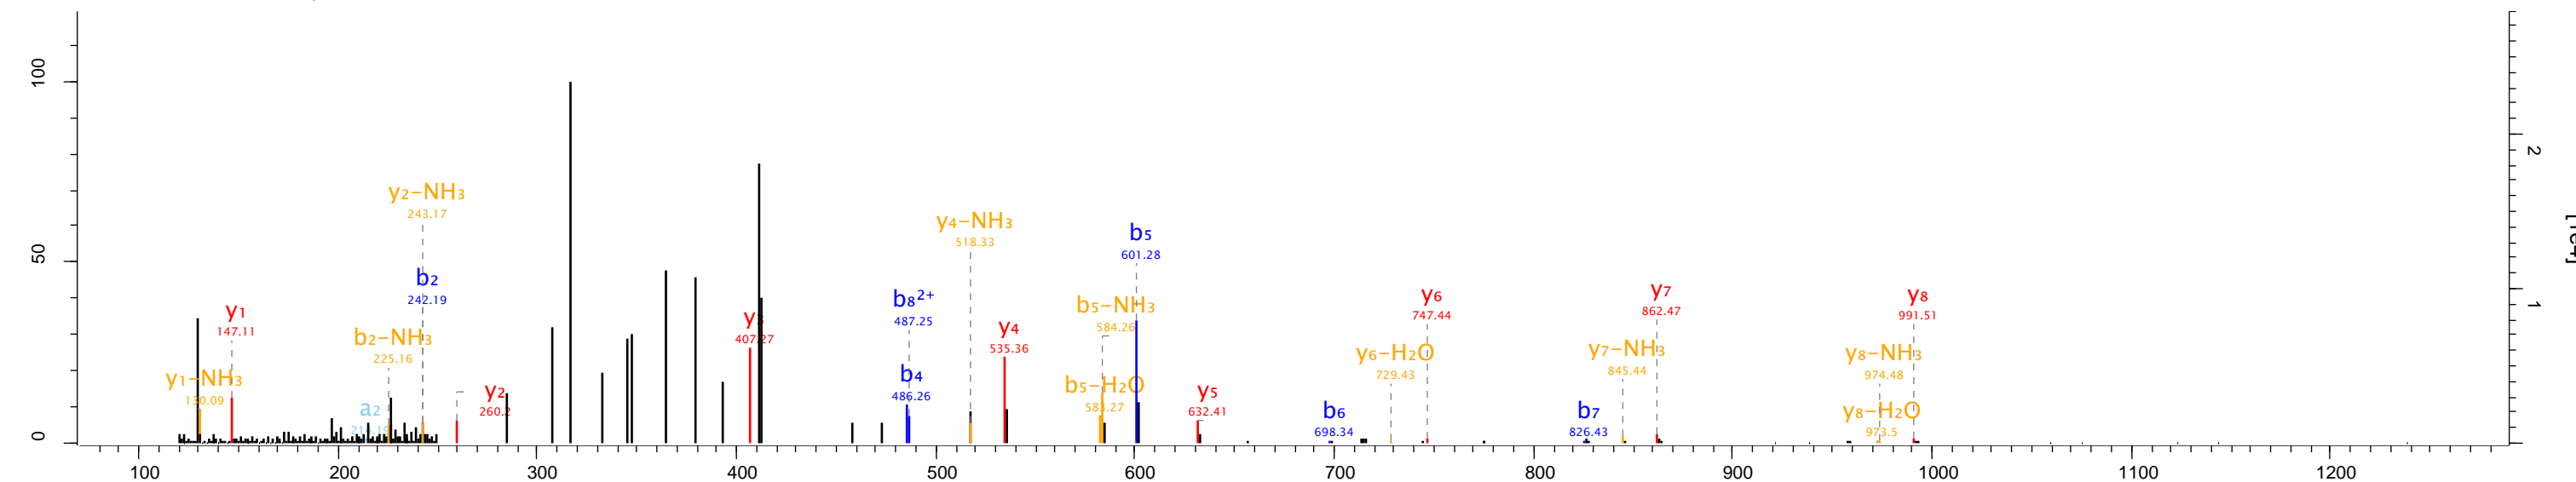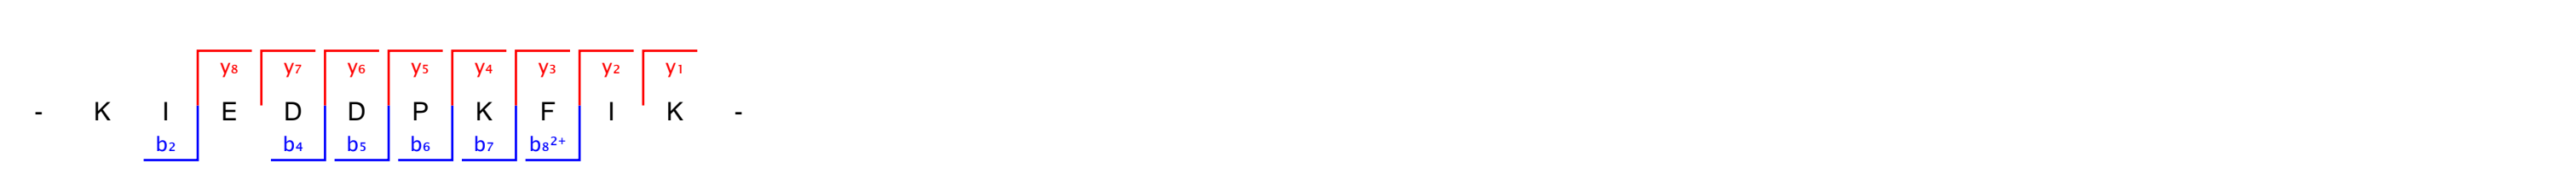

Spectral Annotation for Single-Peptide IDs in 16-cell Embryo using Q-OT-LIT

Raw file 2015-01-05\_CL02\_2Excl15sMaxInj70 Scan 5156 Method ITMS; HCD Score 105.4 m/z 411.57

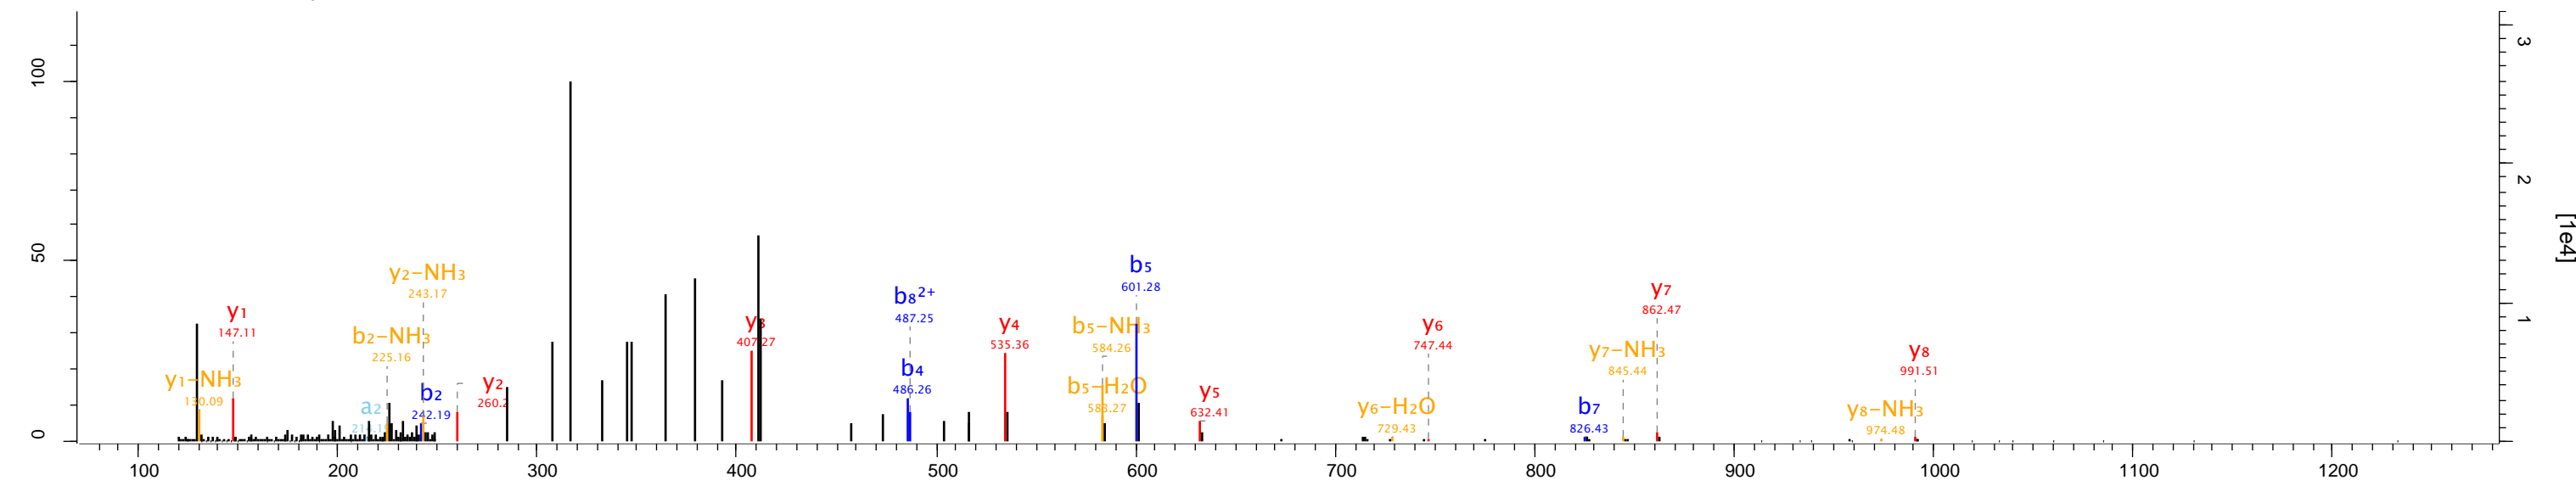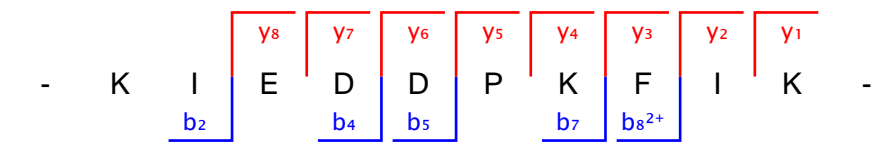



Raw file: 2015-01-05\_CL02\_2Excl15sMaxInj70  
 Scan: 5160 Method: ITMS; HCD Score: 115.91 m/z: 411.56

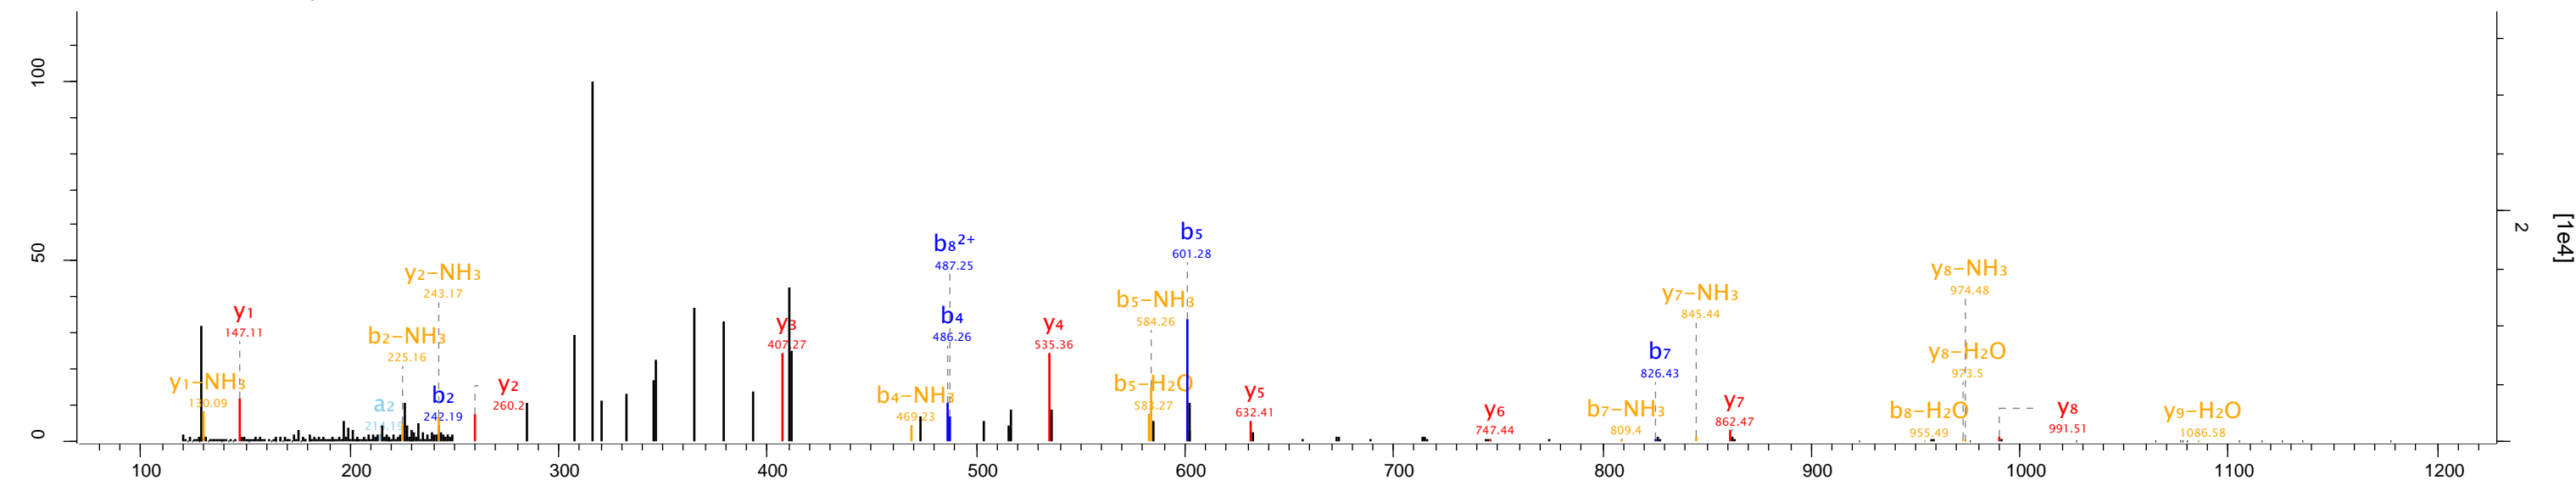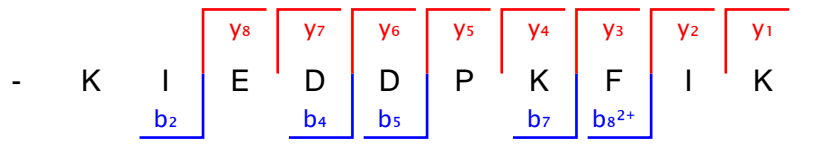

Spectral Annotation for Single-Peptide IDs in 16-cell Embryo using Q-OT-LIT

Raw file 2015-01-05\_CL02\_2Excl15sMaxInj70 Scan 5168 Method ITMS; HCD Score 59.26 m/z 616.84

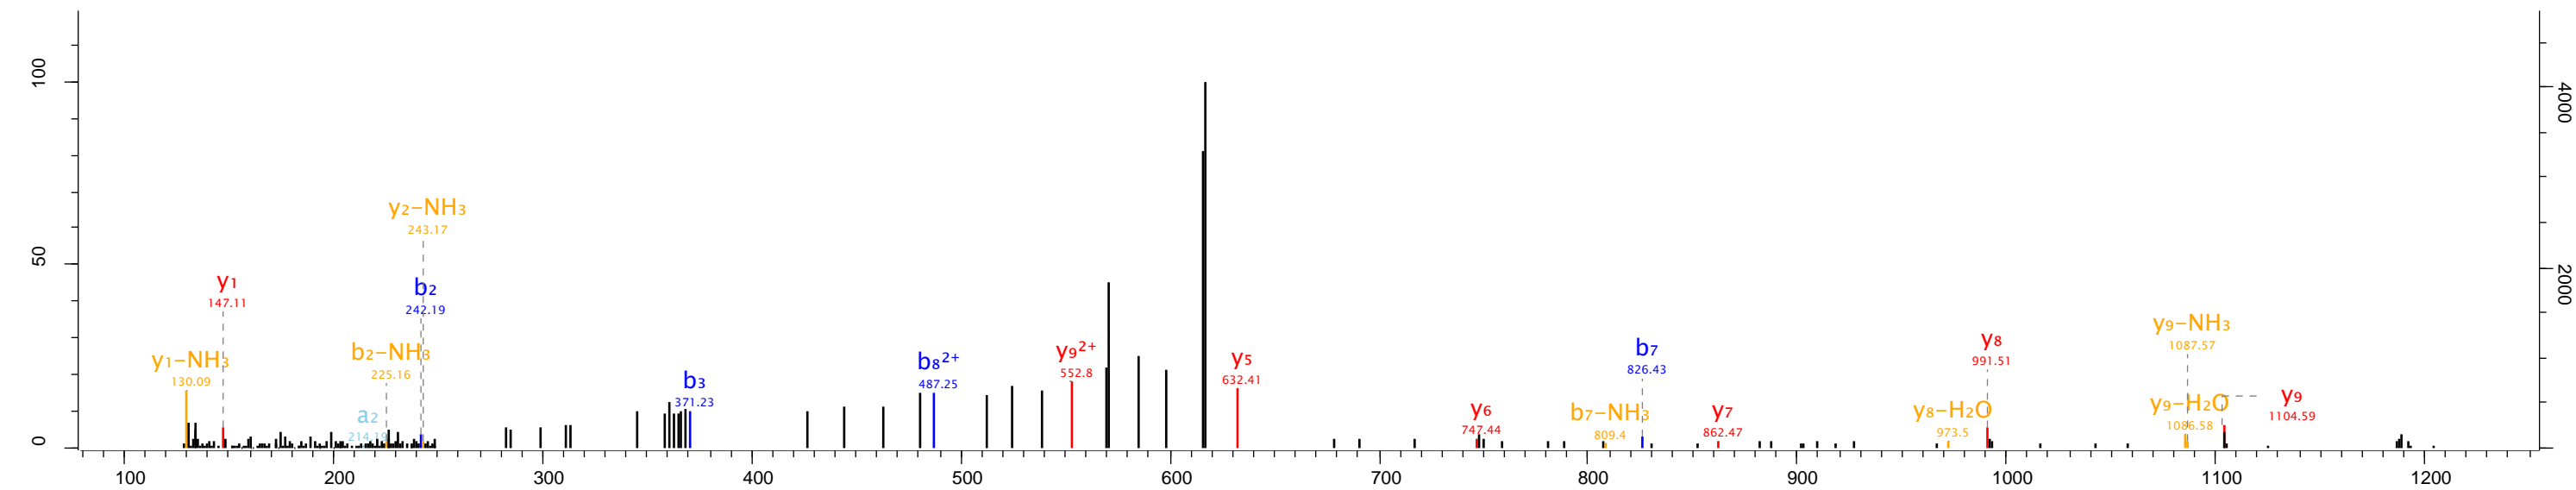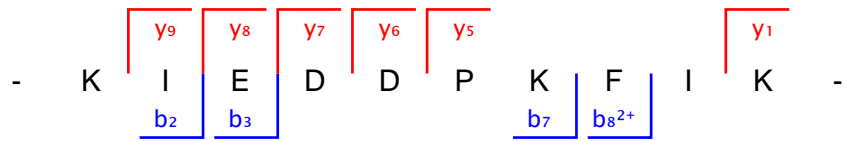

Raw file 2015-01-05\_CL02\_2Excl15sMaxInj70 Scan 5267 Method ITMS; HCD Score 80.01 m/z 422.58

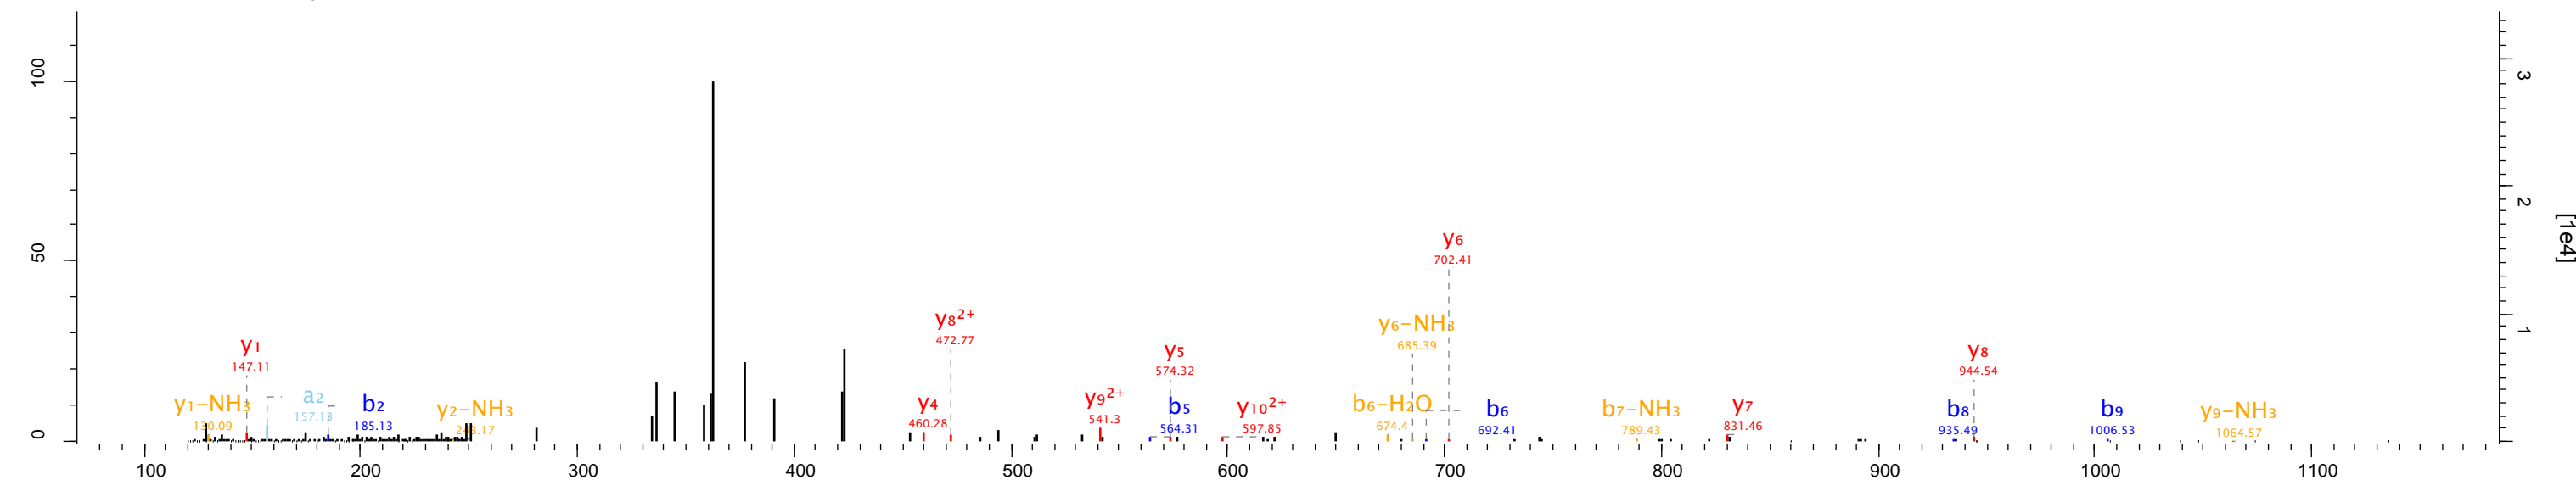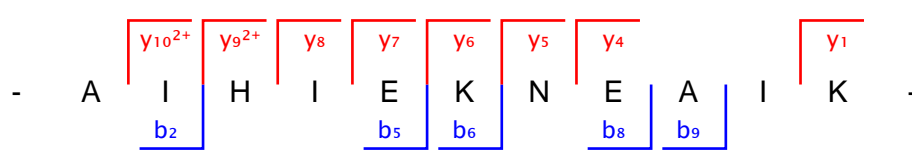

Spectral Annotation for Single-Peptide IDs in 16-cell Embryo using Q-OT-LIT

Raw file 2015-01-05\_CL02\_2Excl15sMaxInj70 Scan 5276 Method ITMS; HCD Score 59.42 m/z 422.58

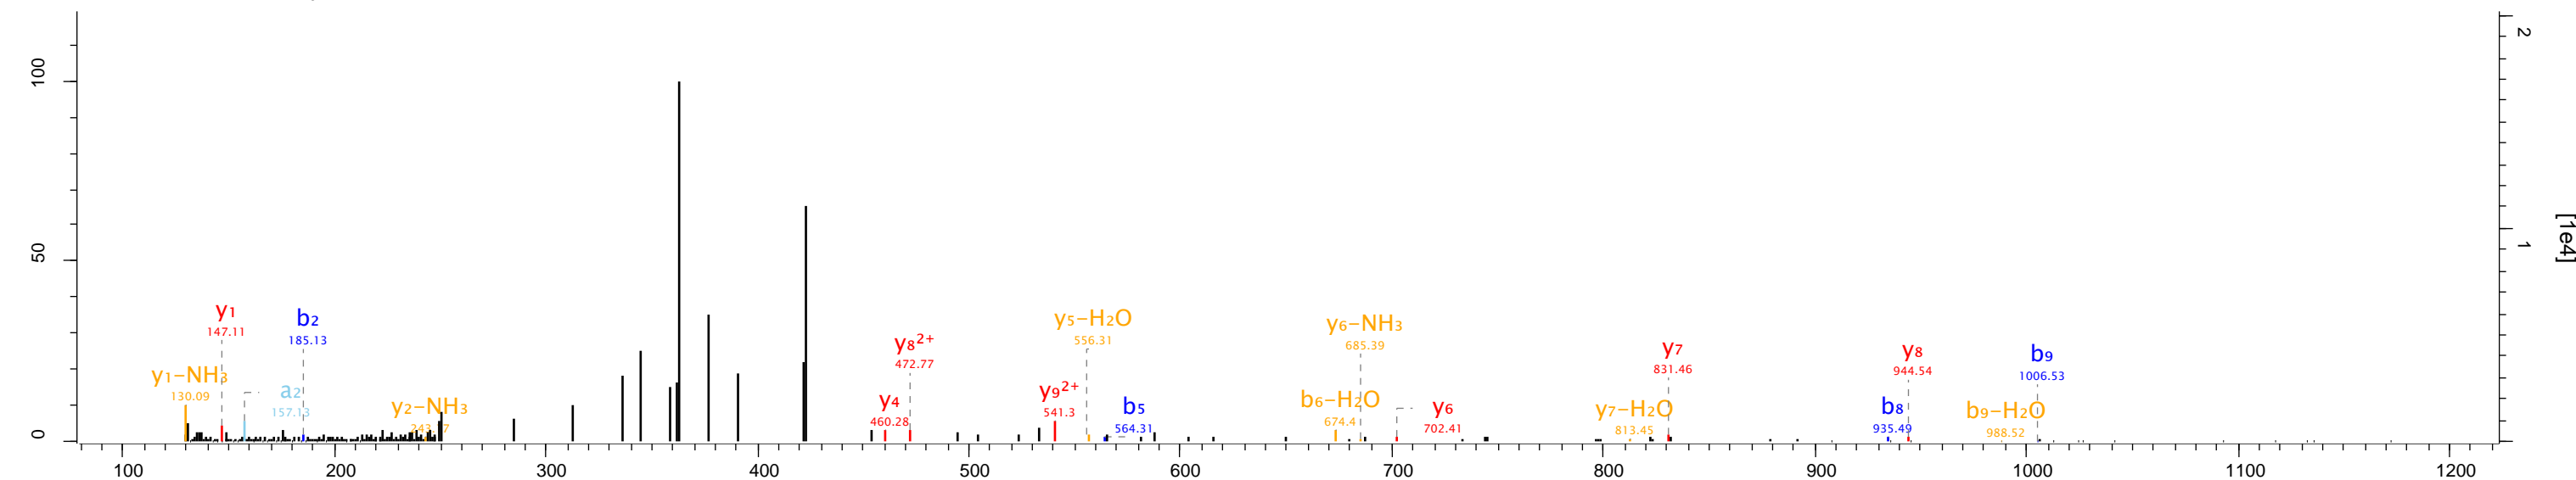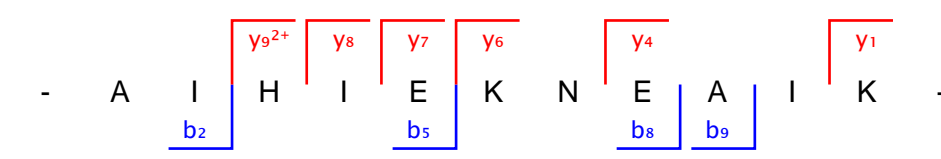

Raw file 2015-01-05\_CL02\_2Excl15sMaxInj70 Scan 5453 Method ITMS; HCD Score 41.54 m/z 453.98

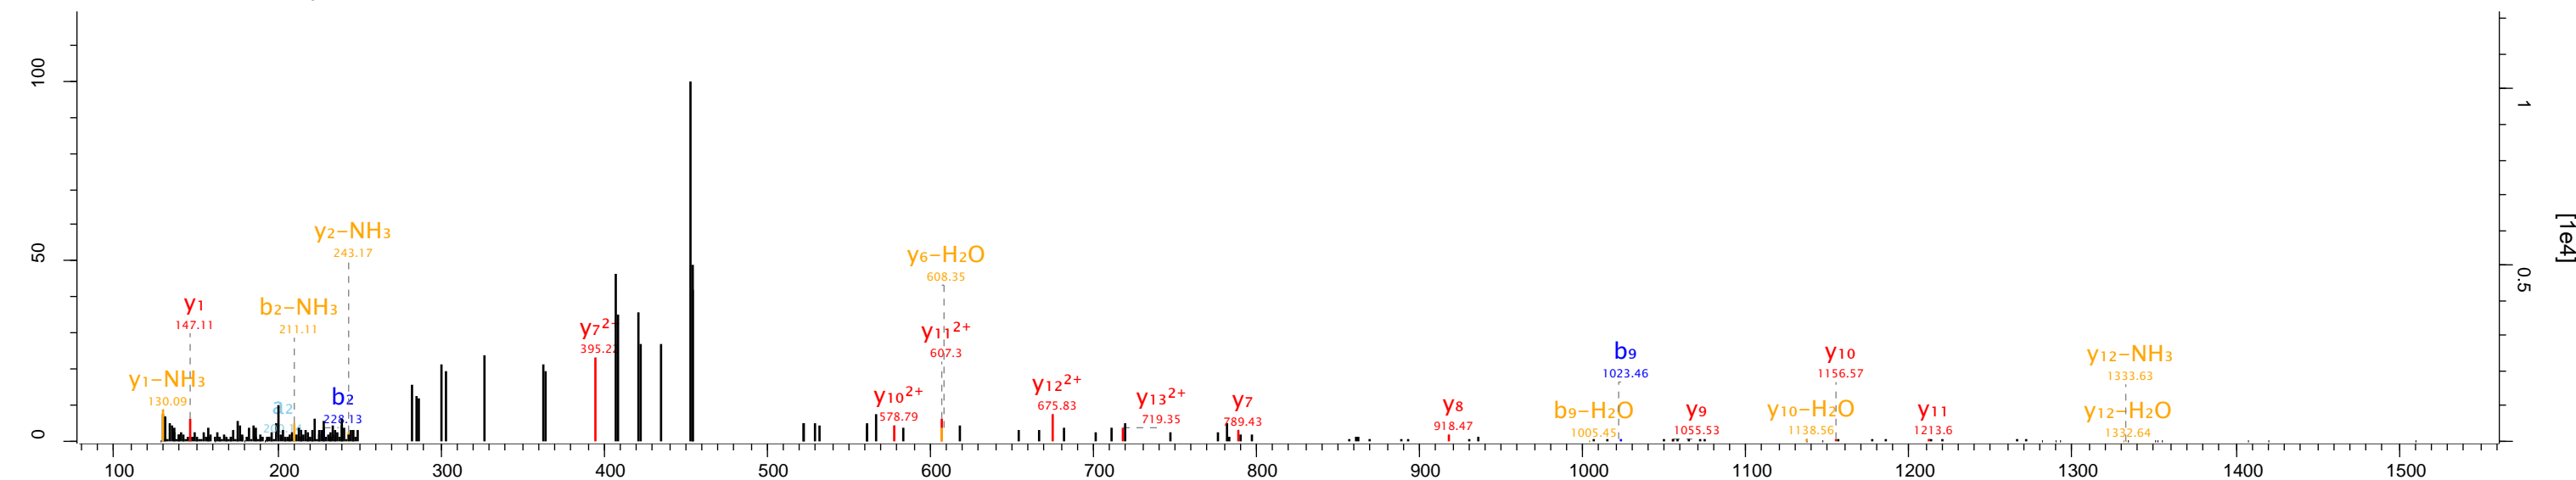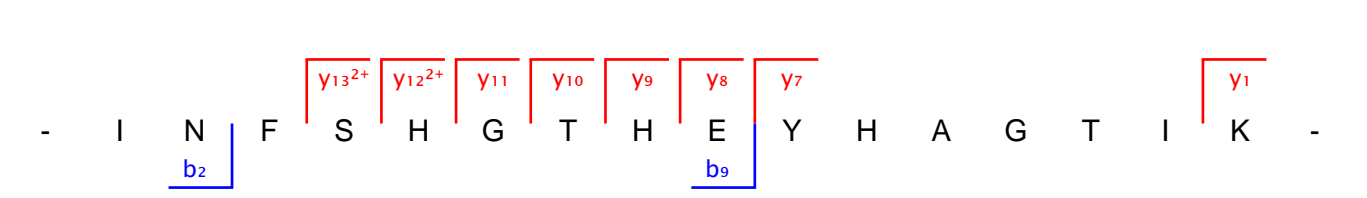

Raw file 2015-01-05\_CL02\_2Excl15sMaxInj70 Scan 5513 Method ITMS; HCD Score 59.64 m/z 387.72

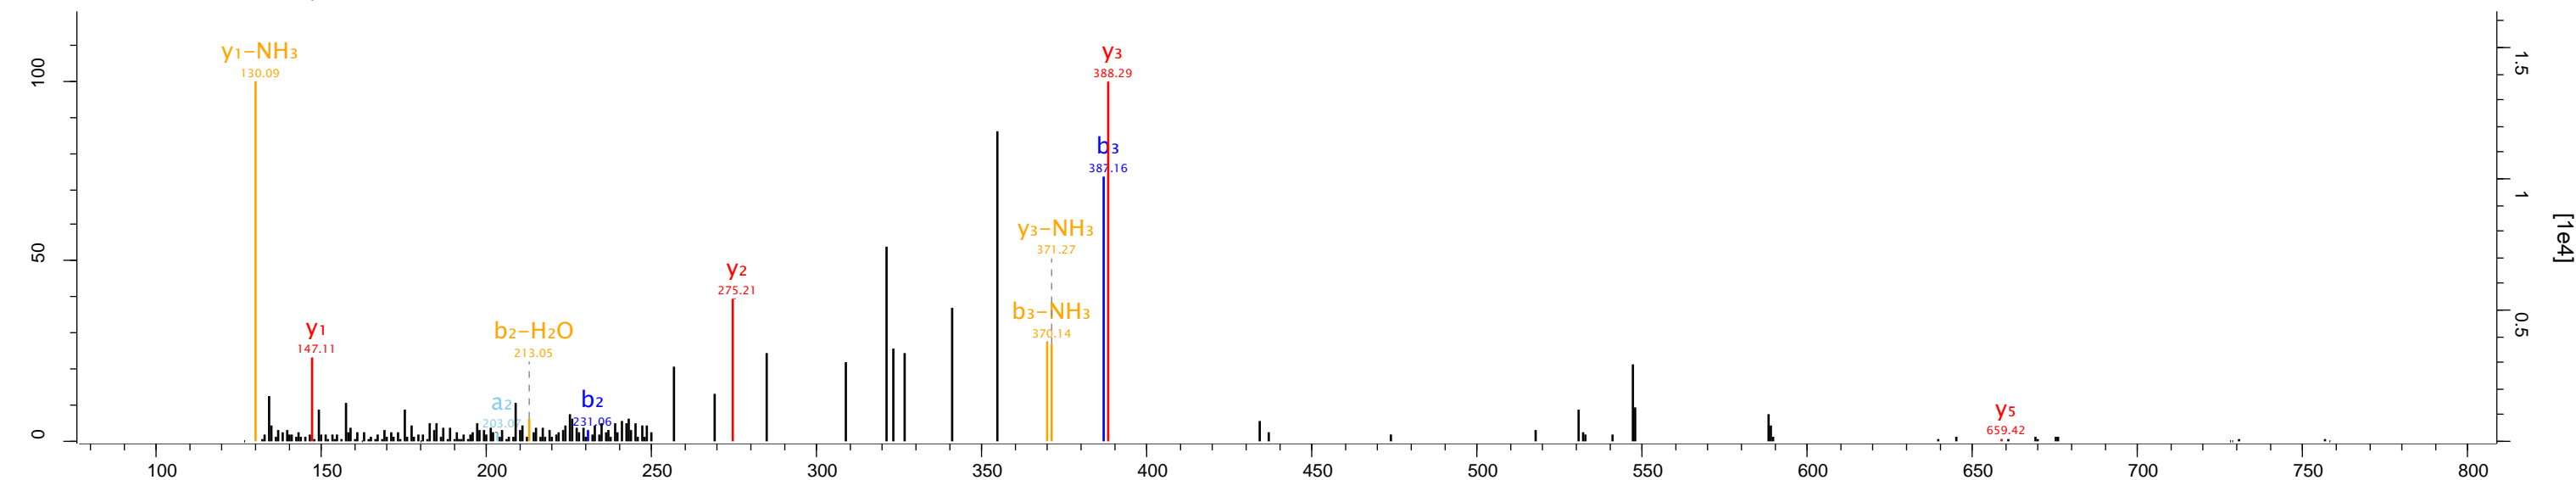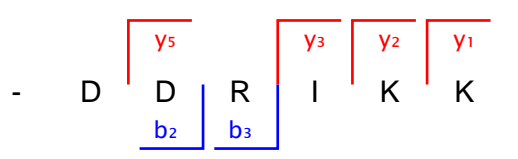

Raw file 2015-01-05\_CL02\_2Excl15sMaxInj70 Scan 5568 Method ITMS; HCD Score 46.95 m/z 470.23

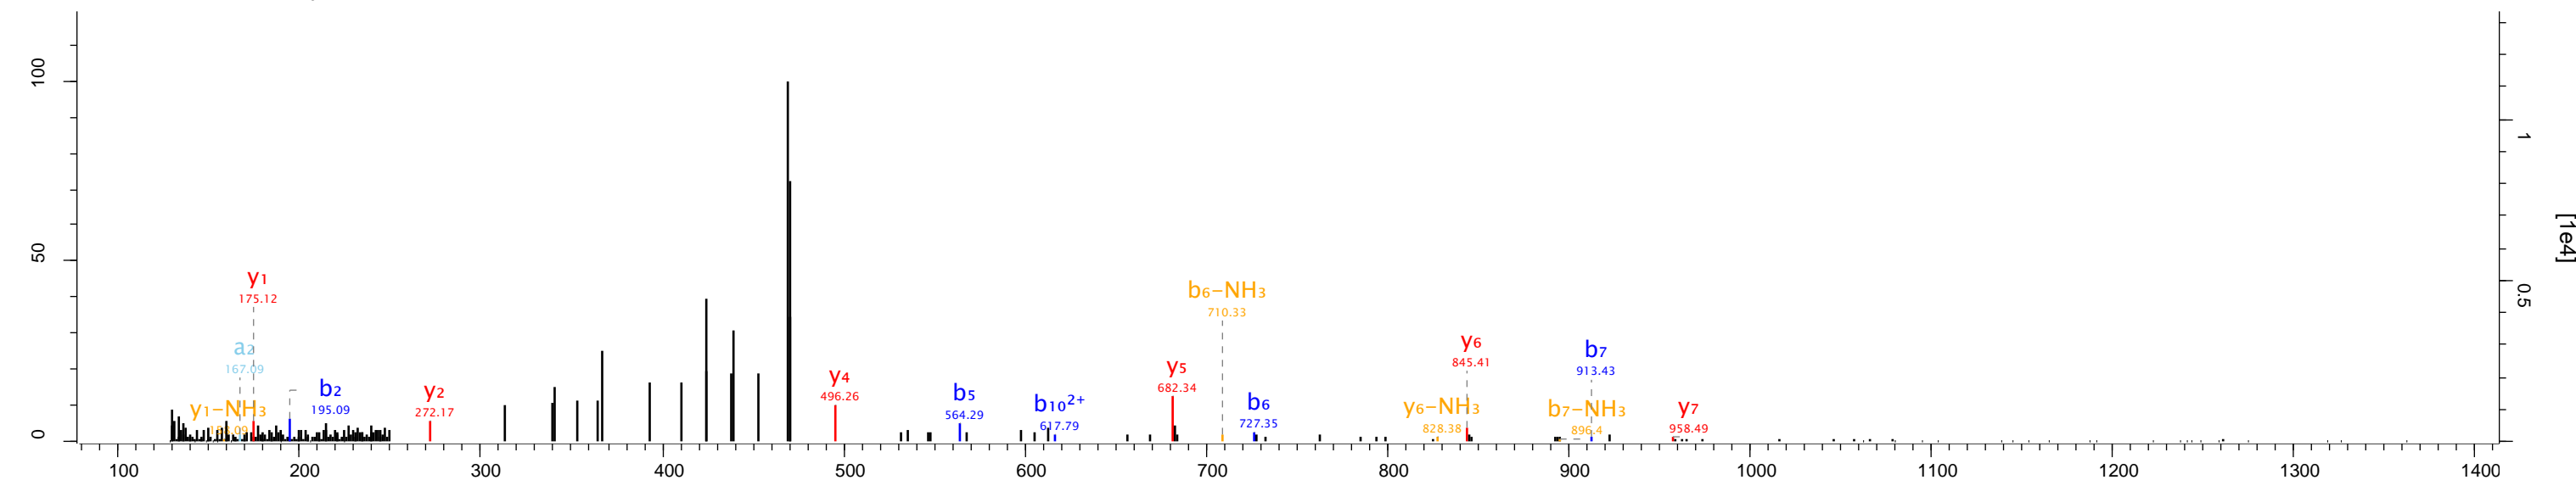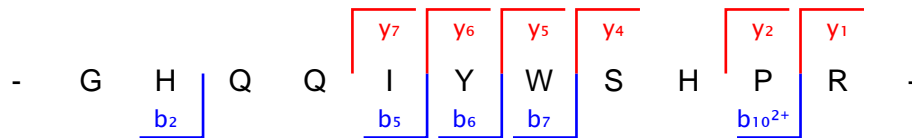

Spectral Annotation for Single-Peptide IDs in 16-cell Embryo using Q-OT-LIT

Raw file 2015-01-05\_CL02\_2Excl15sMaxInj70 Scan 5585 Method ITMS; HCD Score 84.51 m/z 470.23

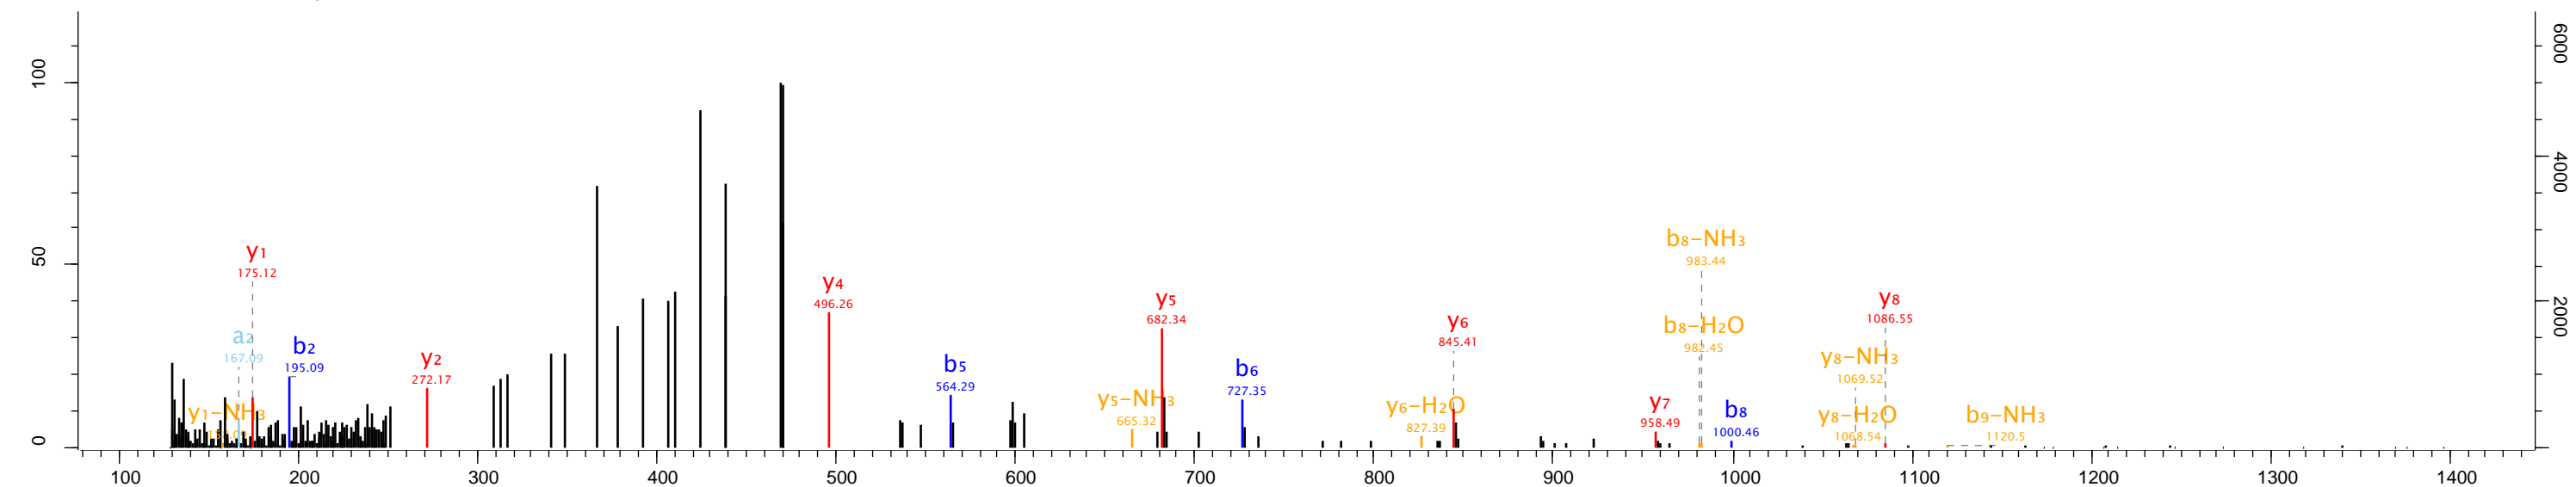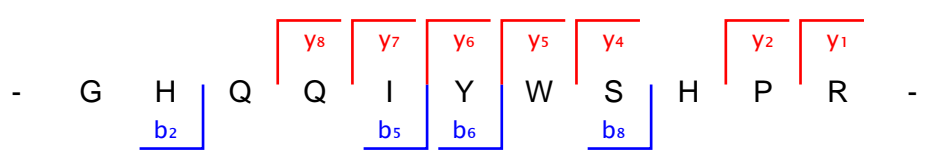



Raw file 2015-01-05\_CL02\_2Excl15sMaxInj70 Scan 5664 Method ITMS; HCD Score 82.64 m/z 462.58

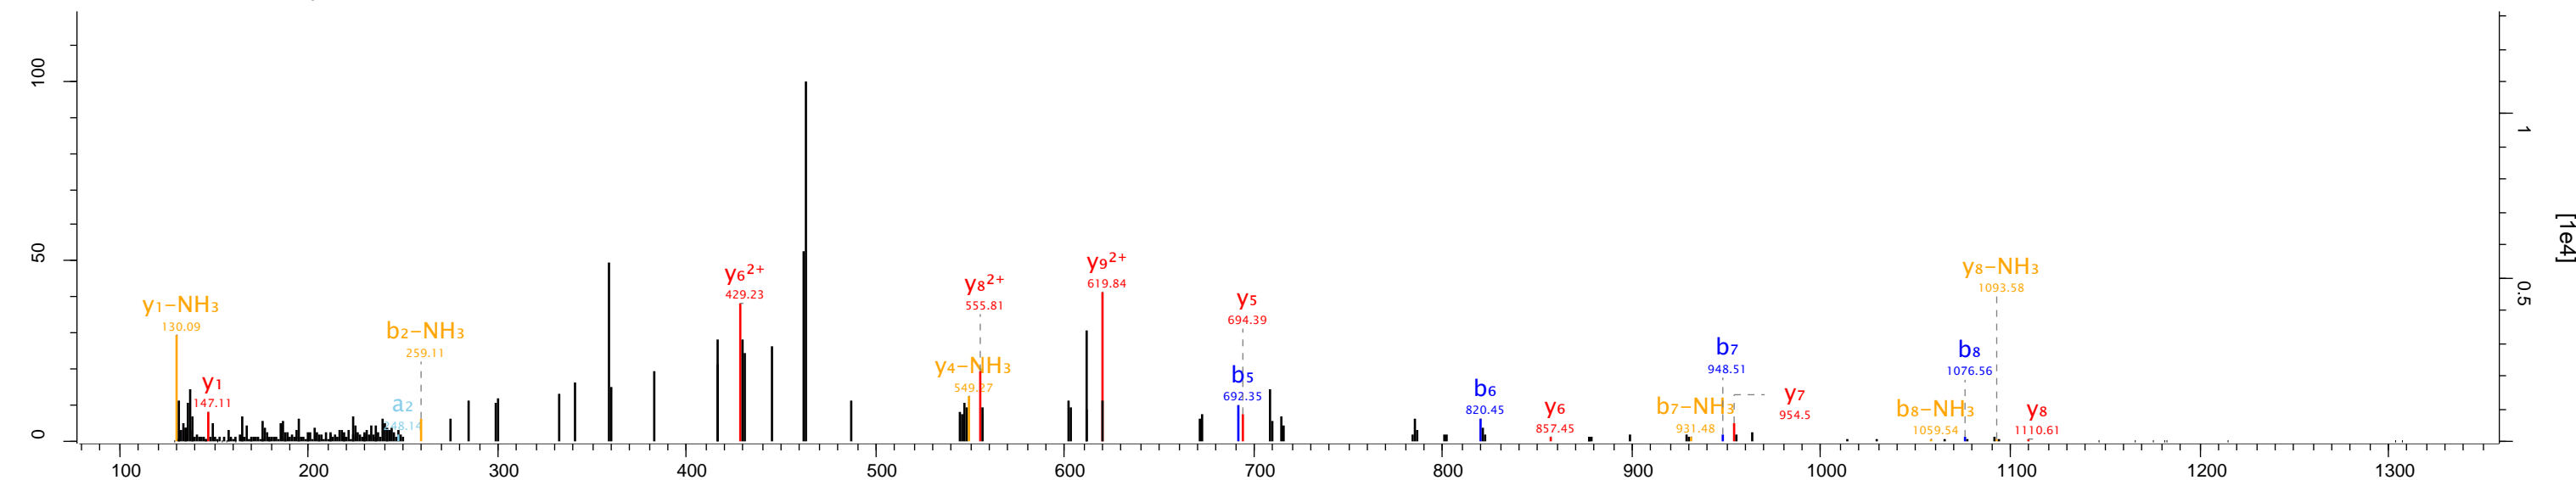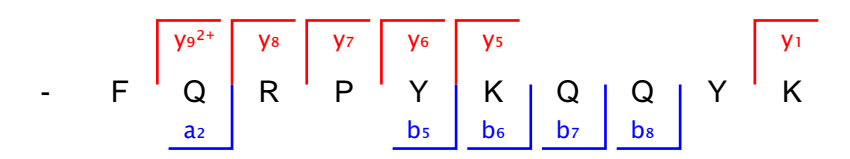

Raw file 2015-01-05\_CL02\_2Excl15sMaxInj70 Scan 5679 Method ITMS; HCD Score 82.64 m/z 462.58

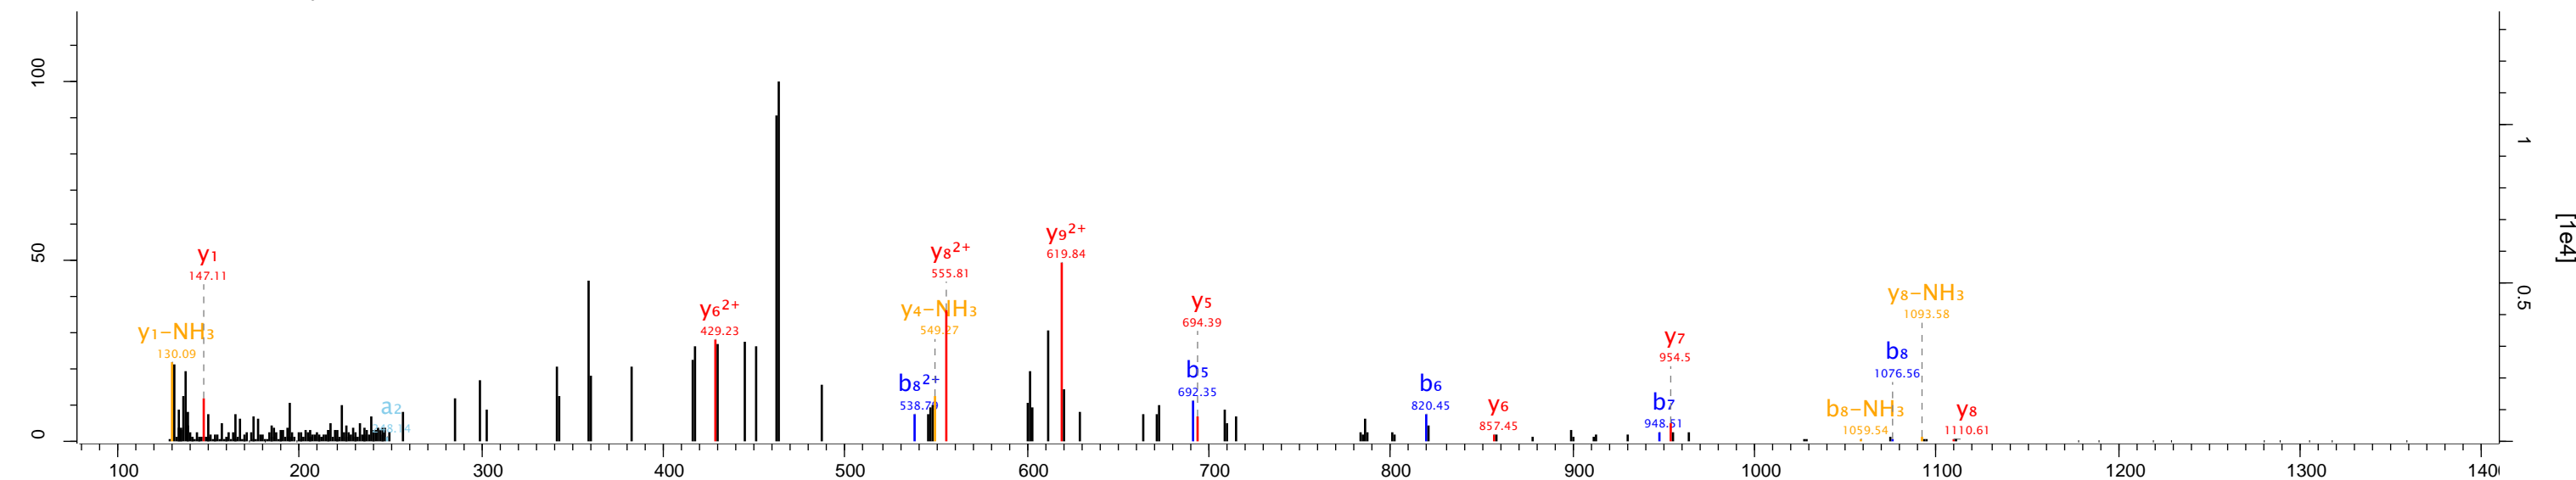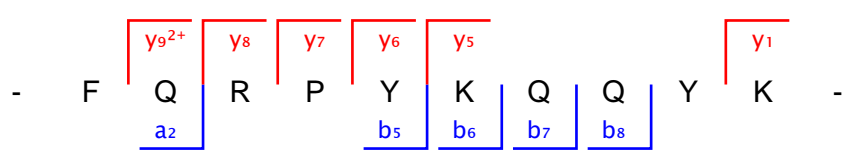

Spectral Annotation for Single-Peptide IDs in 16-cell Embryo using Q-OT-LIT

Raw file 2015-01-05\_CL02\_2Excl15sMaxInj70 Scan 6558 Method ITMS; HCD Score 44.31 m/z 527.52

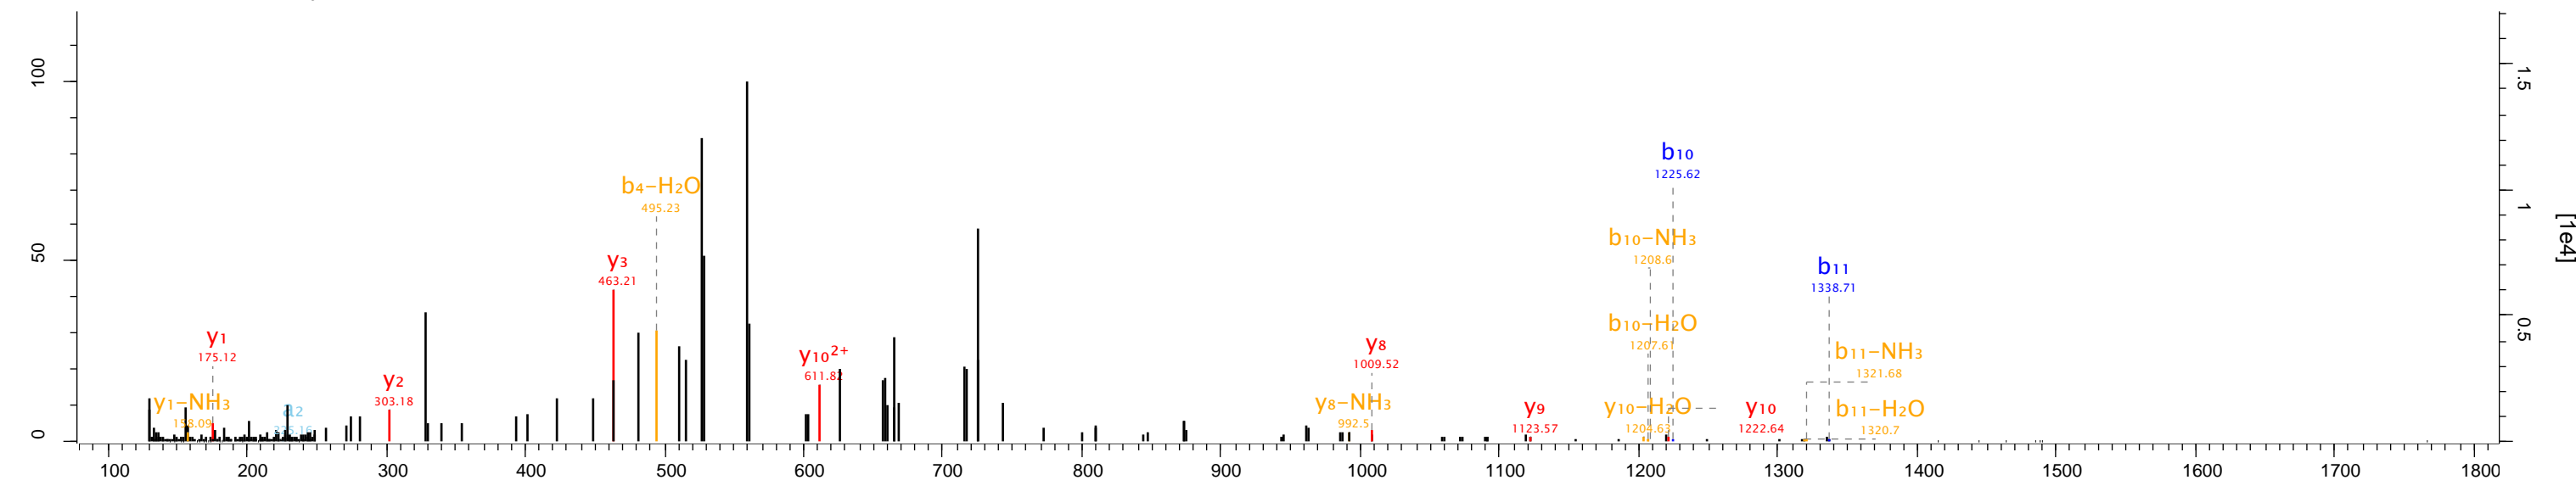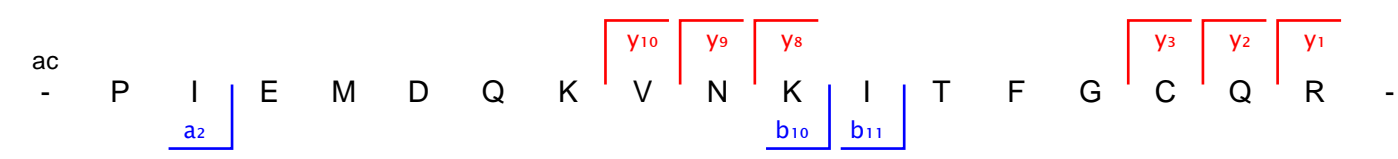

Raw file 2015-01-05\_CL02\_2Excl15sMaxInj70 Scan 6740 Method ITMS; HCD Score 47.62 m/z 487.28

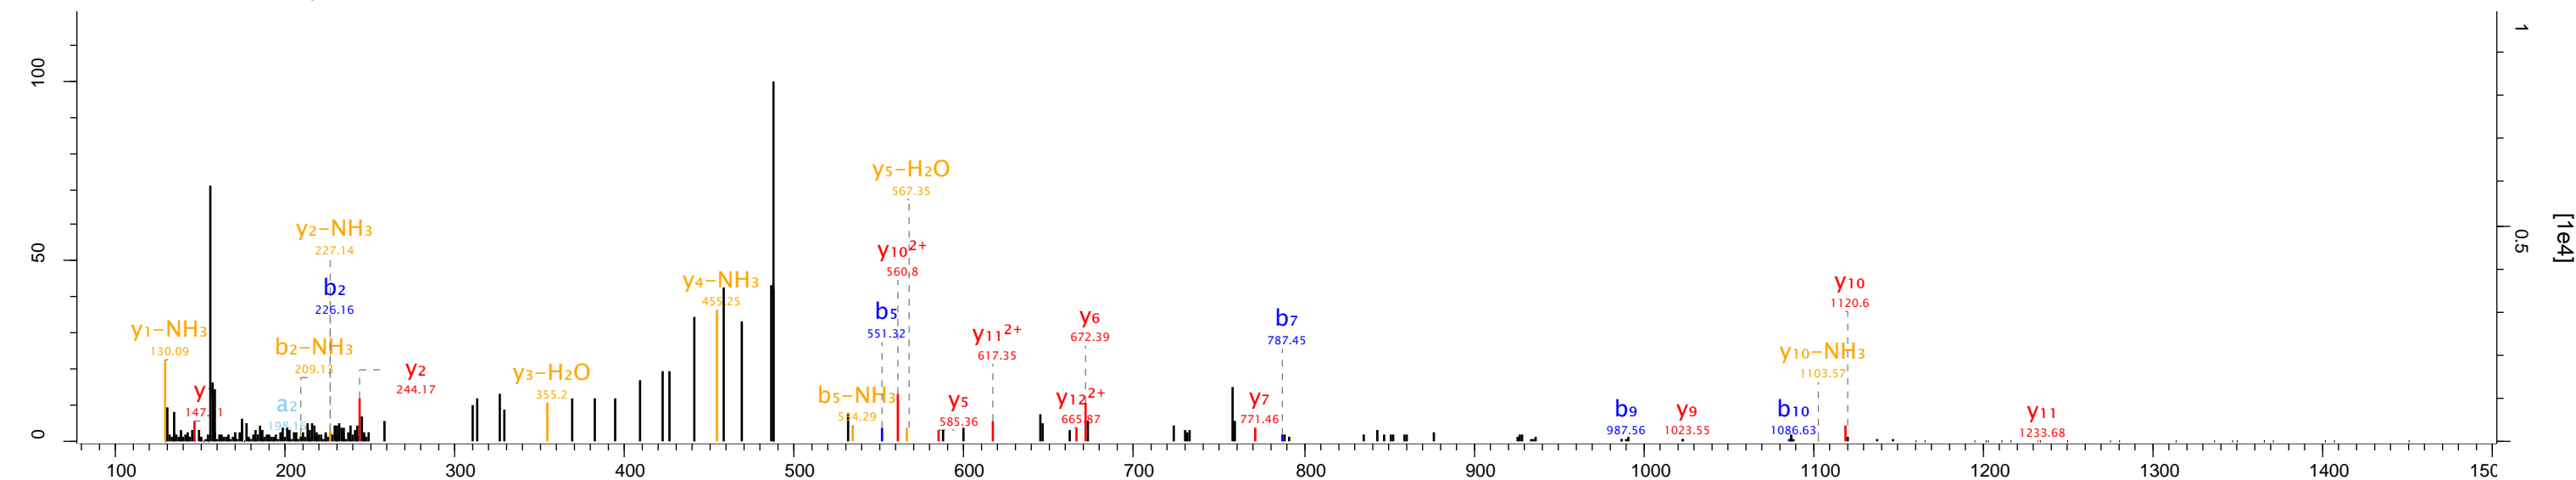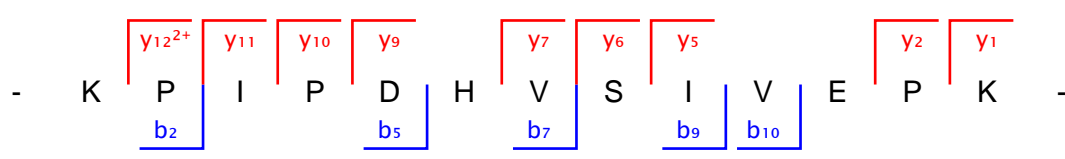

Spectral Annotation for Single-Peptide IDs in 16-cell Embryo using Q-OT-LIT

Raw file: 2015-01-05\_CL02\_2Excl15sMaxInj70  
 Scan: 6866 Method: ITMS; HCD Score: 98.58 m/z: 492.27

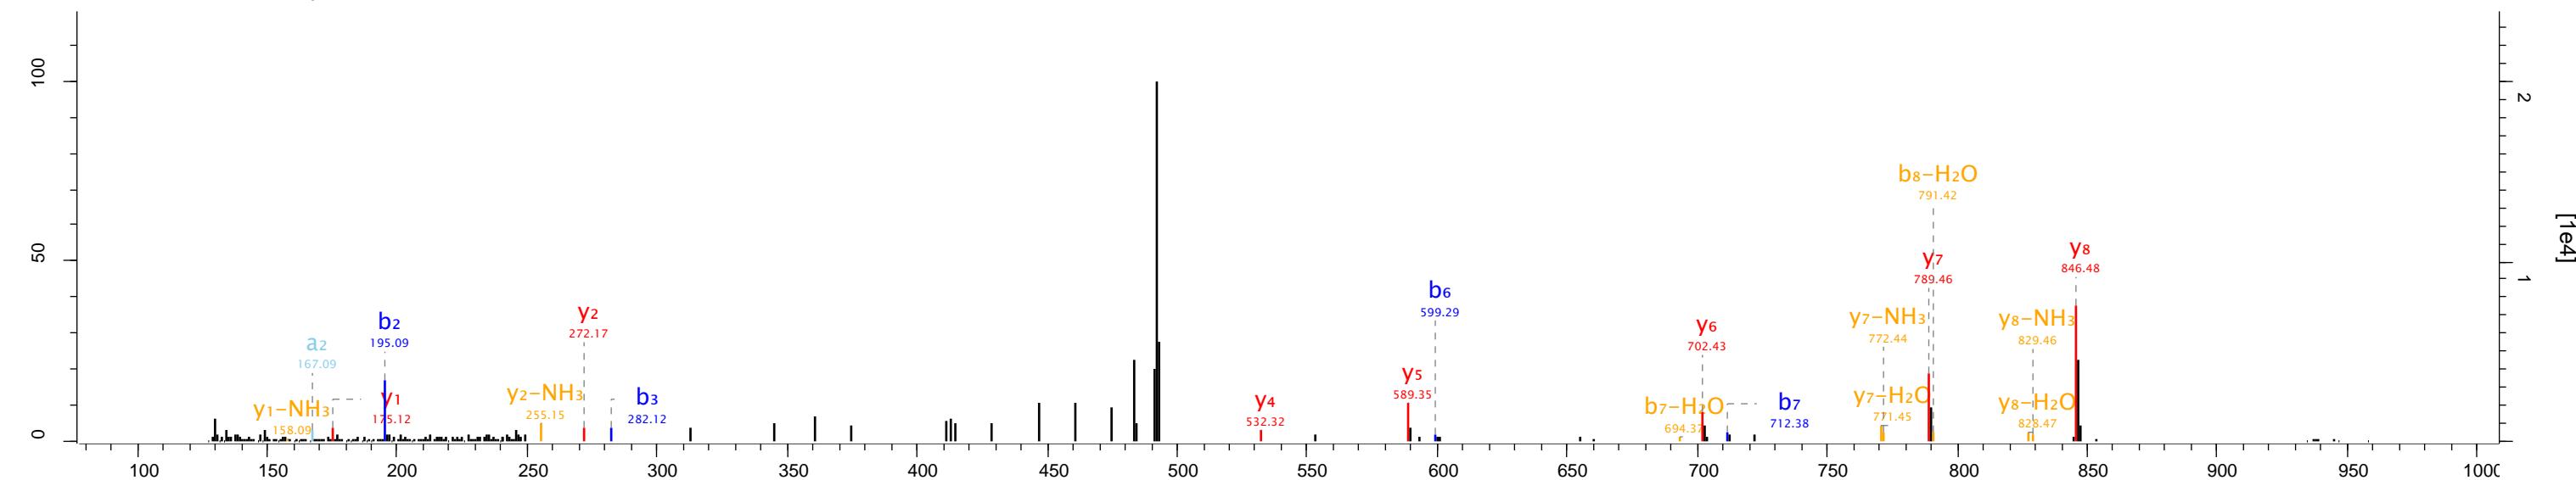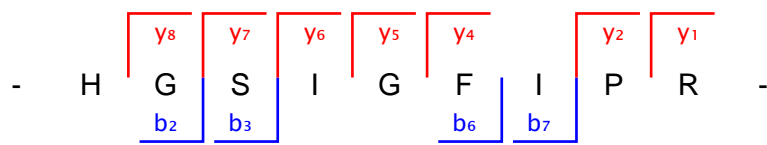

Raw file: 2015-01-05\_CL02\_2Excl15sMaxInj70  
 Scan: 6877 Method: ITMS; HCD Score: 106.68 m/z: 492.27

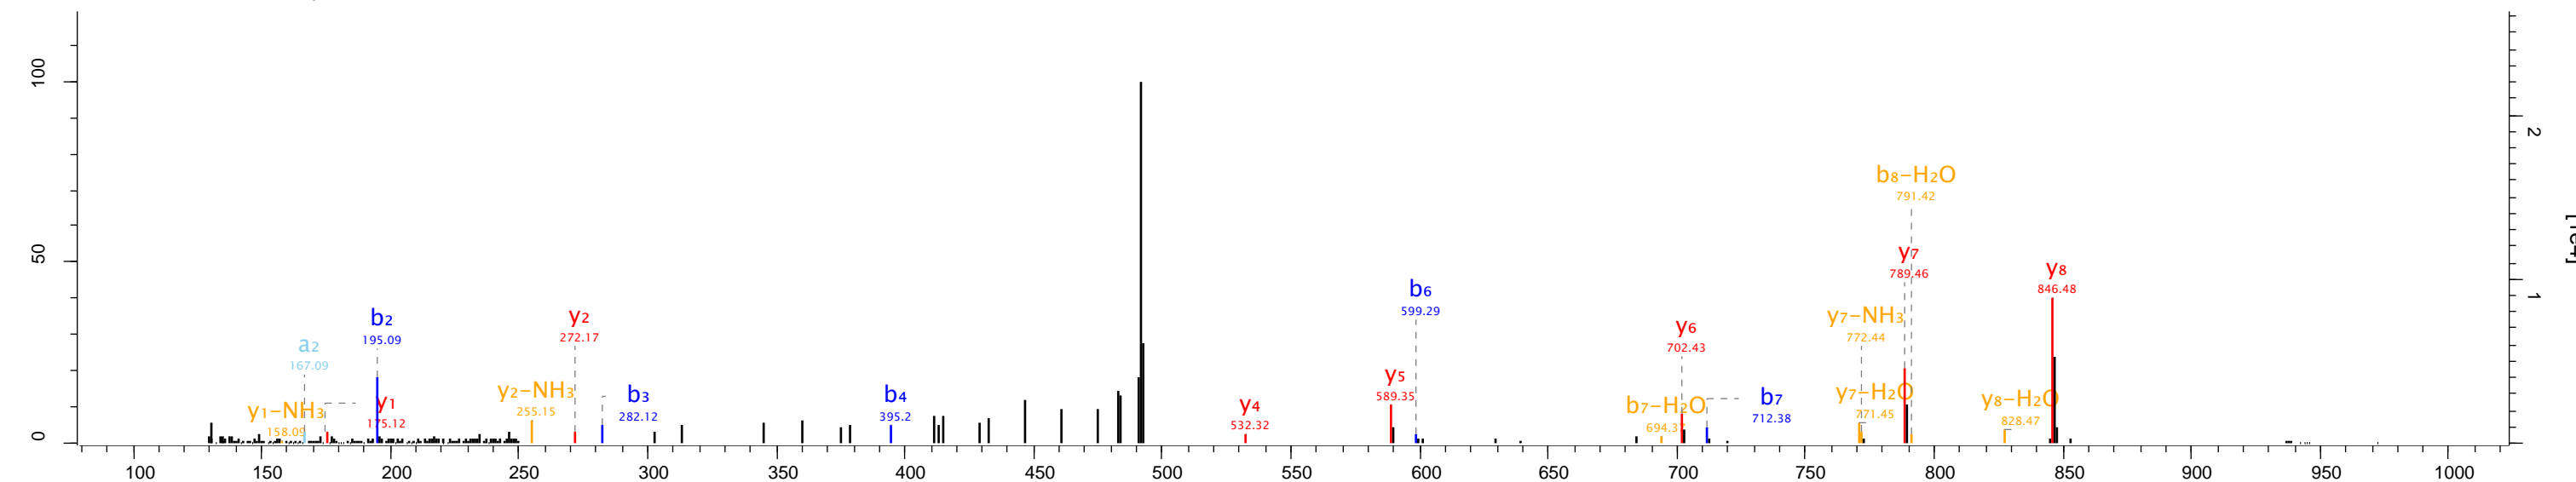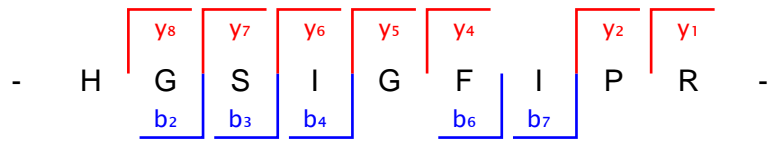

Raw file 2015-01-05\_CL02\_2Excl15sMaxInj70 Scan 6889 Method ITMS; HCD Score 90.6 m/z 492.27

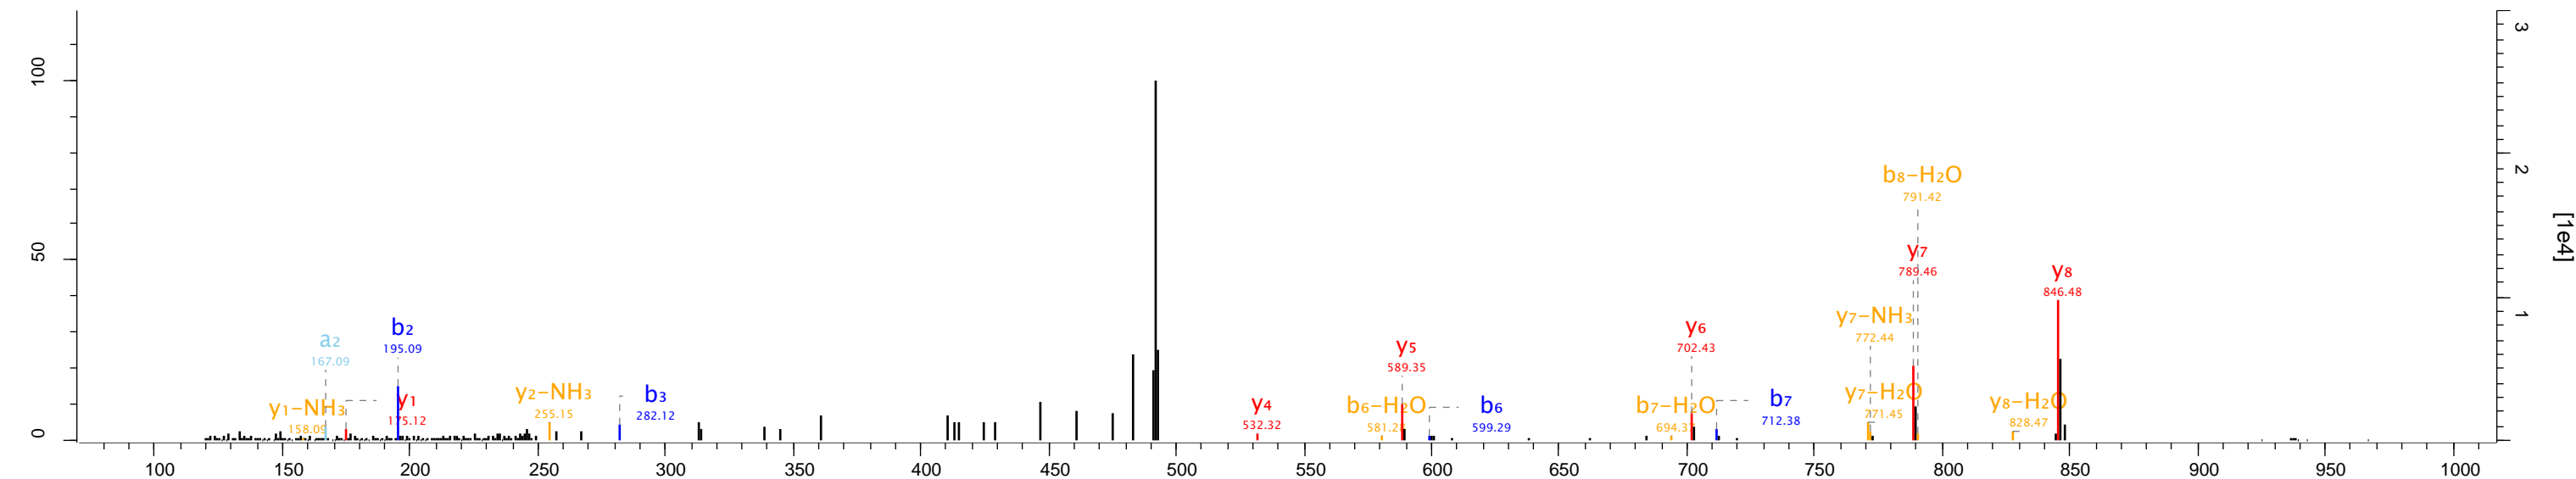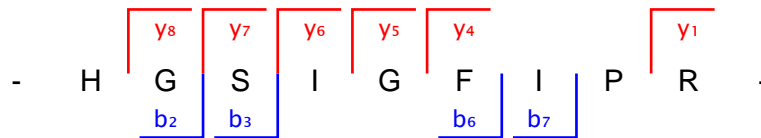

Raw file 2015-01-05\_CL02\_2Excl15sMaxInj70 Scan 6946 Method ITMS; HCD Score 58.82 m/z 525.97

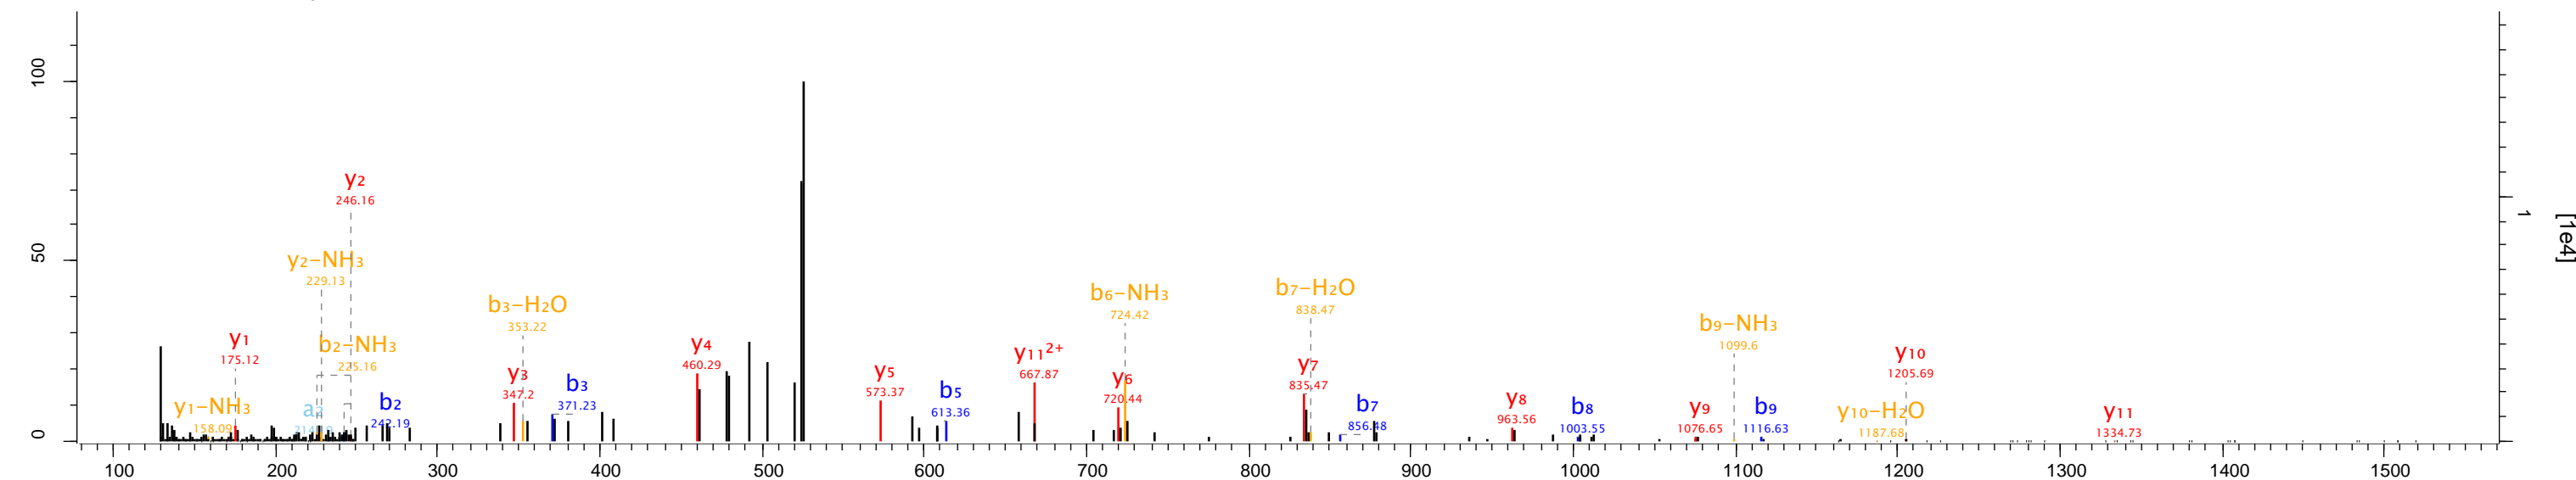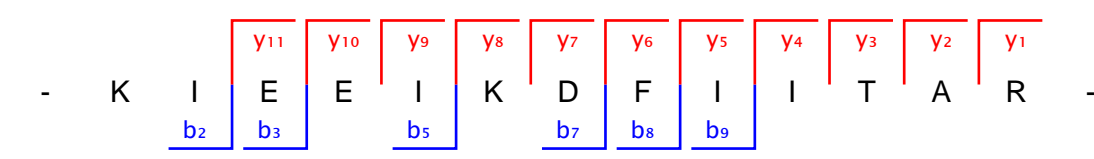



Raw file 2015-01-05\_CL02\_2Excl15sMaxInj70 Scan 6973 Method ITMS; HCD Score 72.68 m/z 537.94

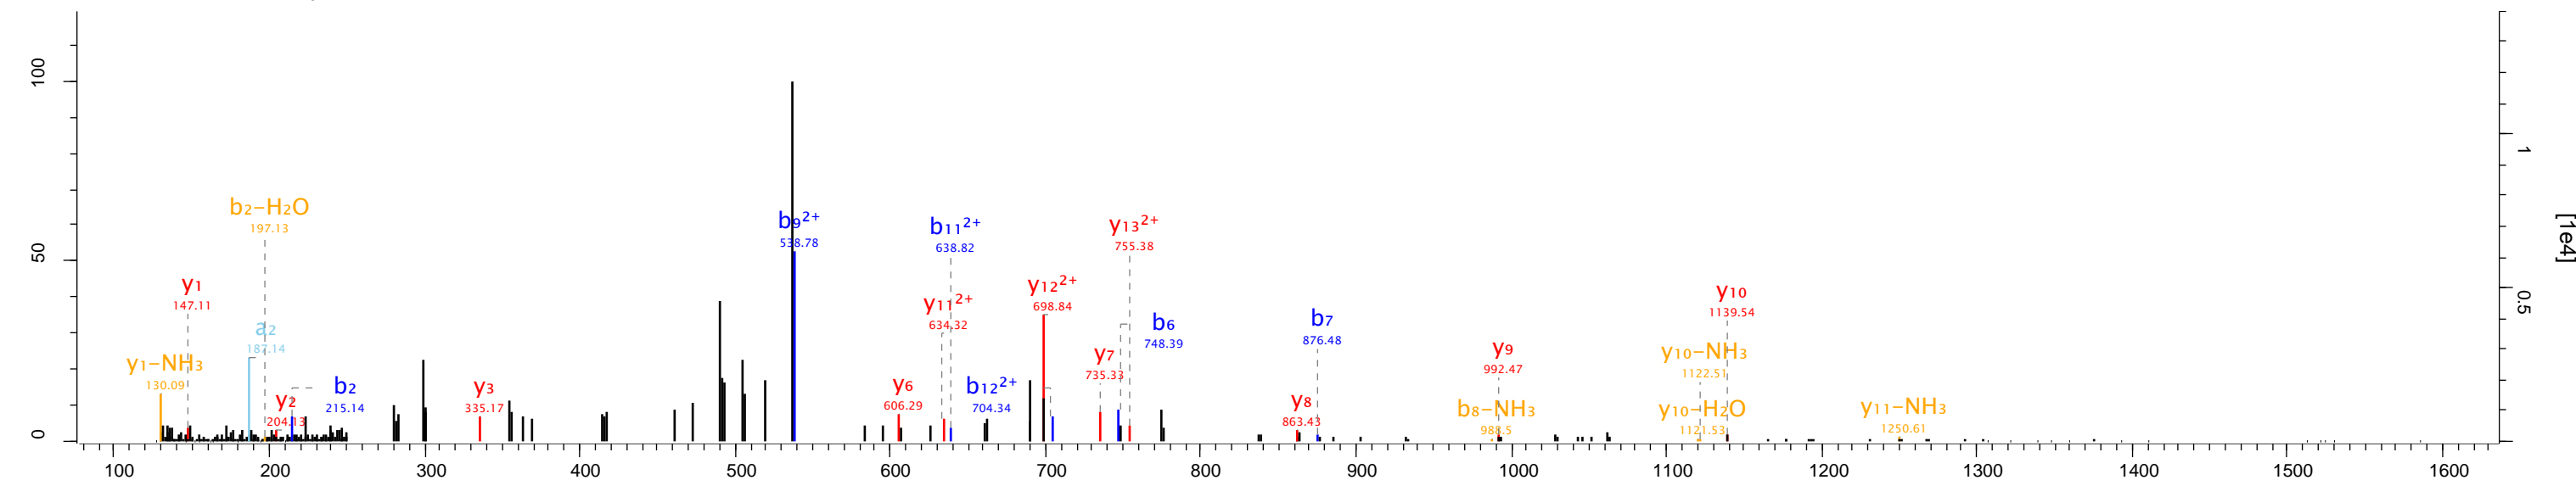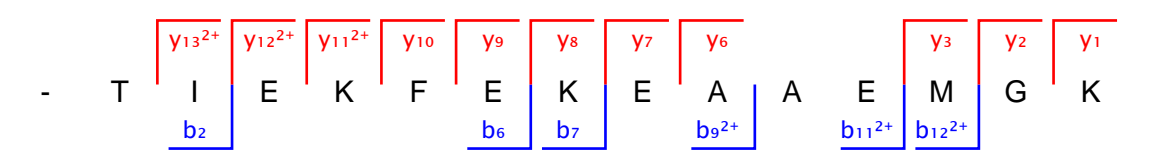

Spectral Annotation for Single-Peptide IDs in 16-cell Embryo using Q-OT-LIT

Raw file 2015-01-05\_CL02\_2Excl15sMaxInj70 Scan 7048 Method ITMS; HCD Score 57.41 m/z 537.94

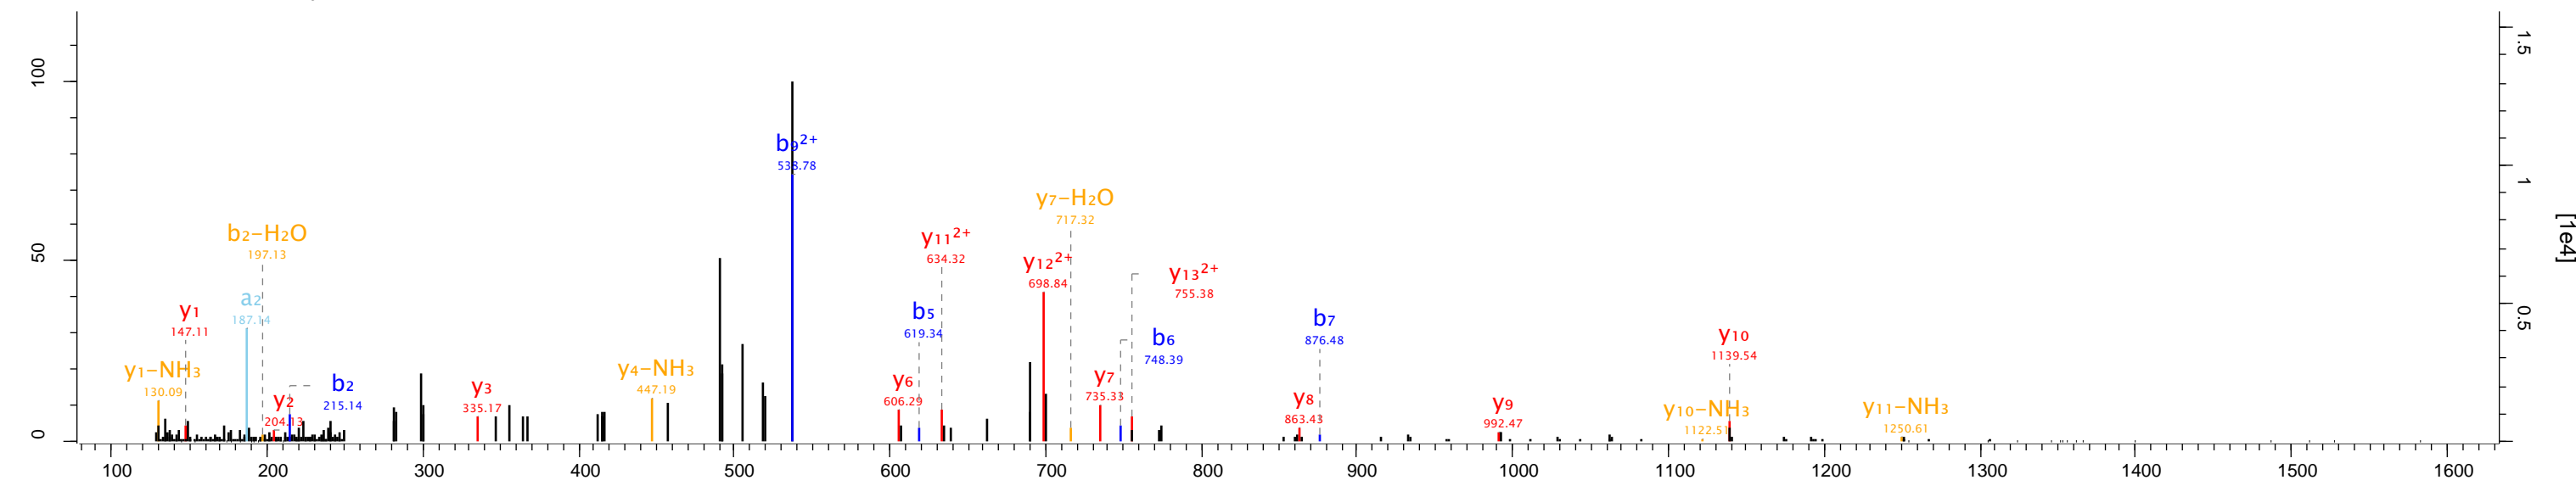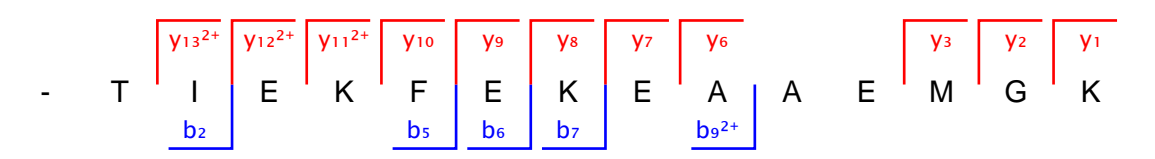

Raw file 2015-01-05\_CL02\_2Excl15sMaxInj70 Scan 7098 Method ITMS; HCD Score 50.79 m/z 521.92

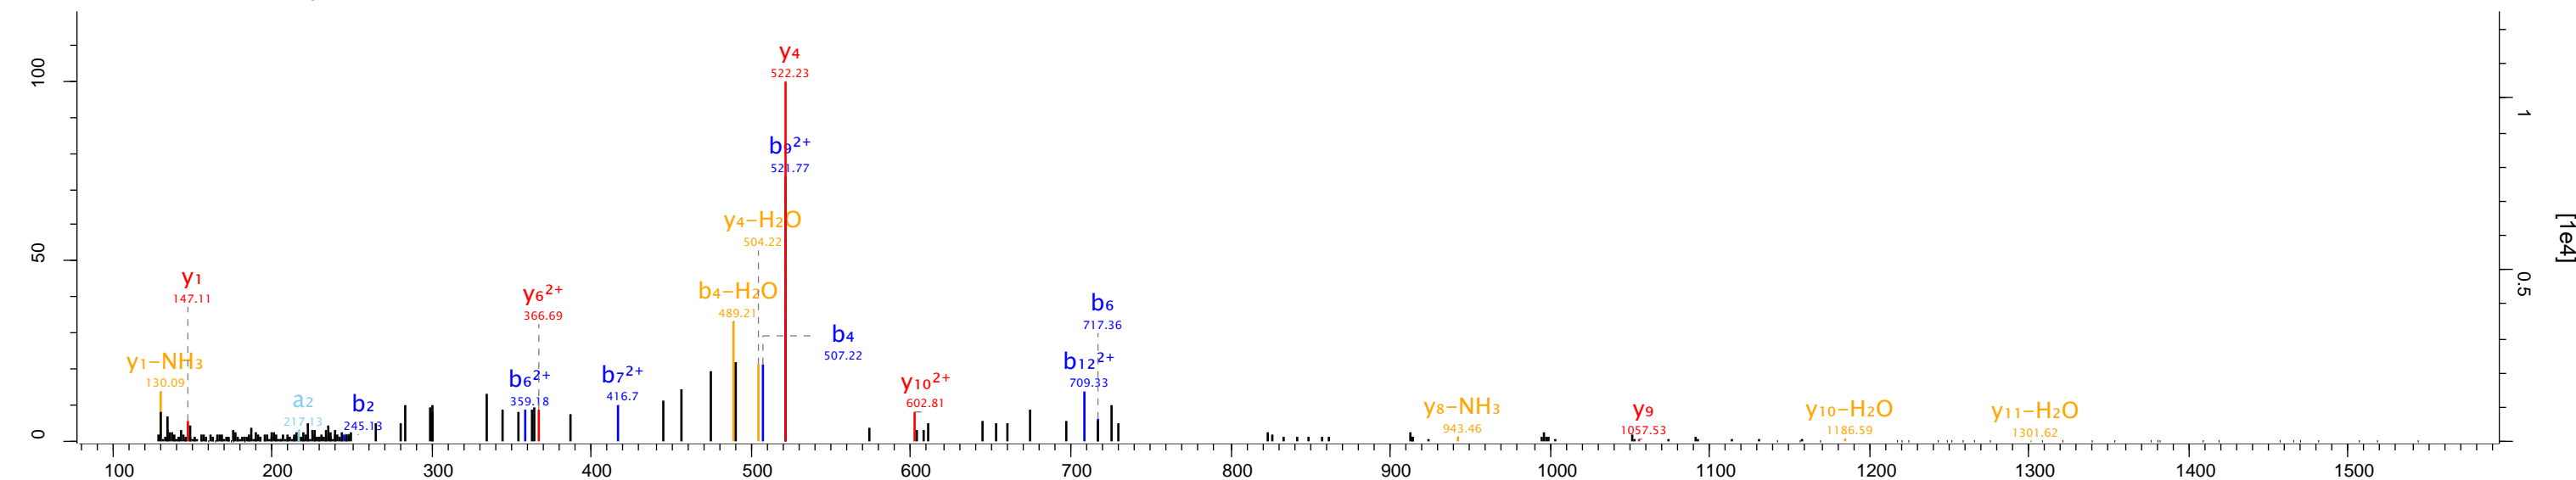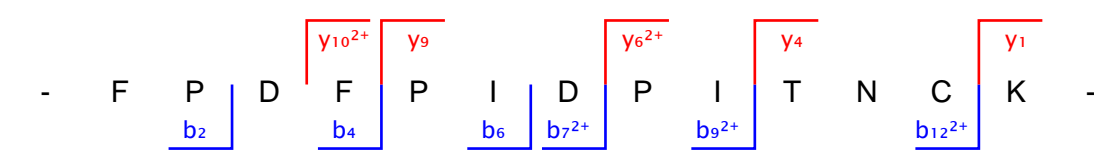

Raw file 2015-01-05\_CL02\_2Excl15sMaxInj70 Scan 7114 Method ITMS; HCD Score 44.61 m/z 521.92

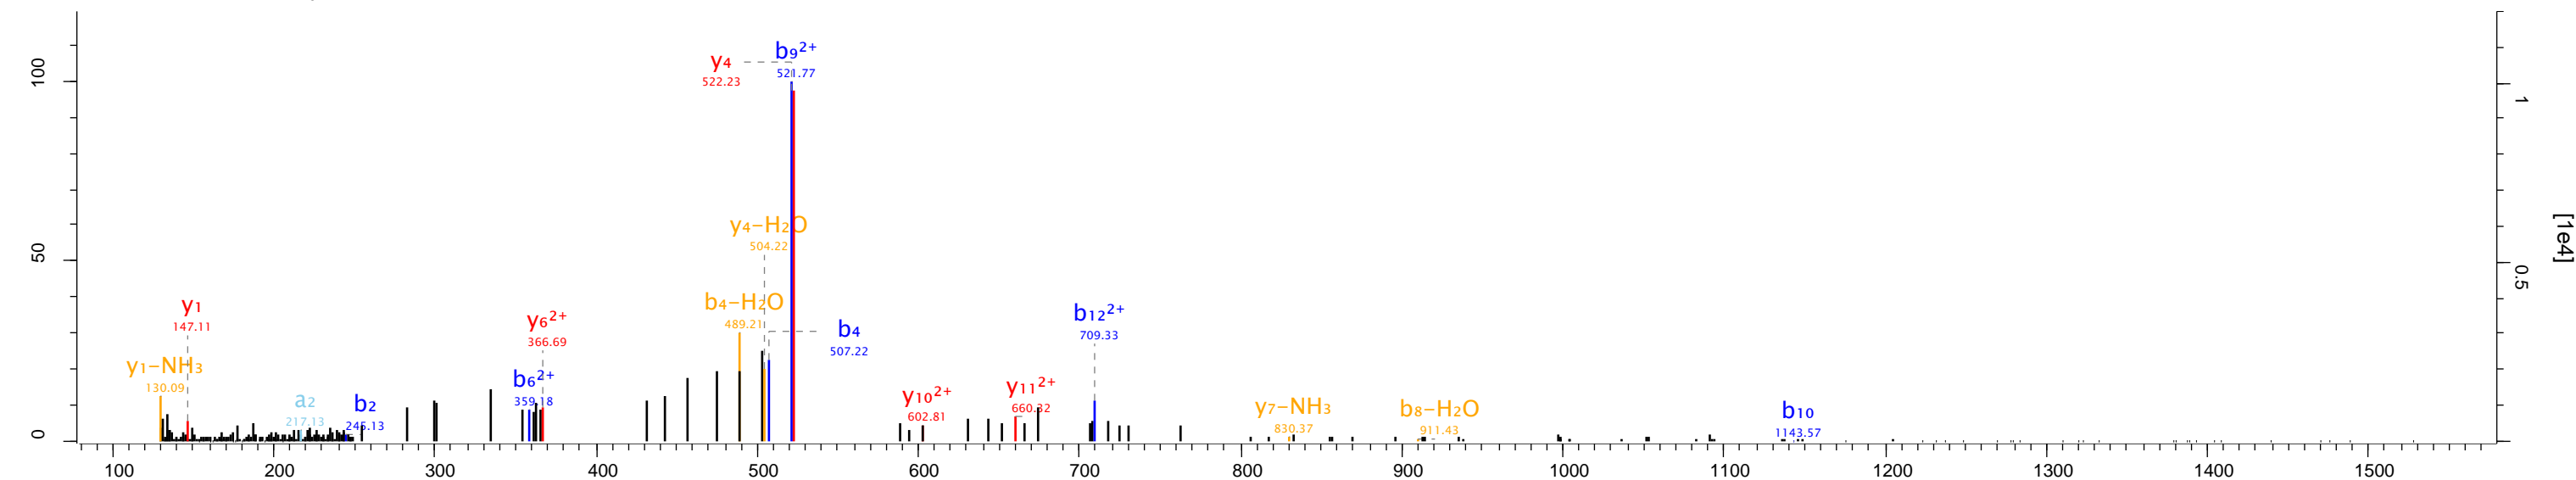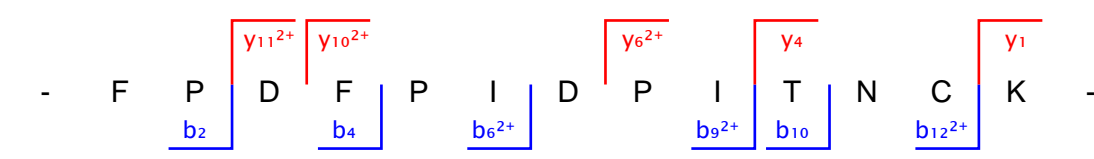

Raw file 2015-01-05\_CL02\_2Excl15sMaxInj70 Scan 7231 Method ITMS; HCD Score 89.46 m/z 530.58

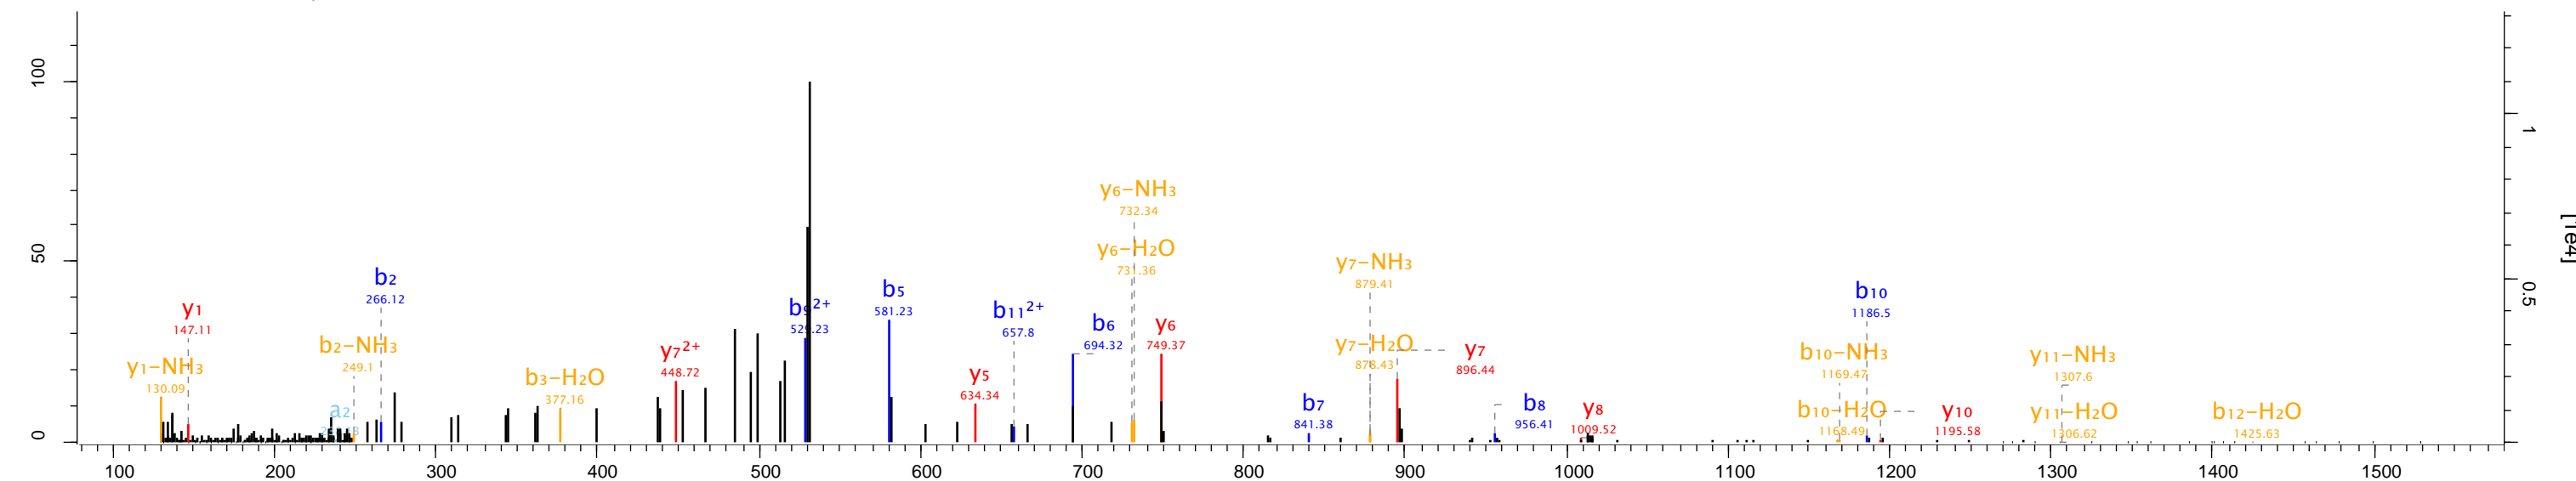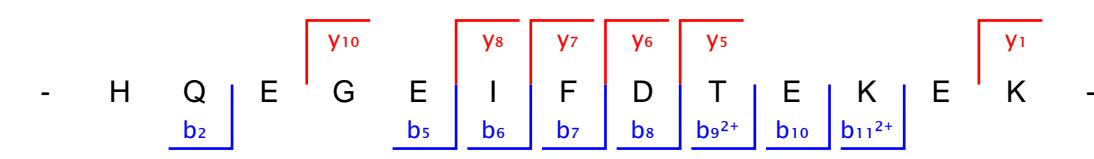

Spectral Annotation for Single-Peptide IDs in 16-cell Embryo using Q-OT-LIT

Raw file 2015-01-05\_CL02\_2Excl15sMaxInj70 Scan 7726 Method ITMS; HCD Score 51.03 m/z 540.27

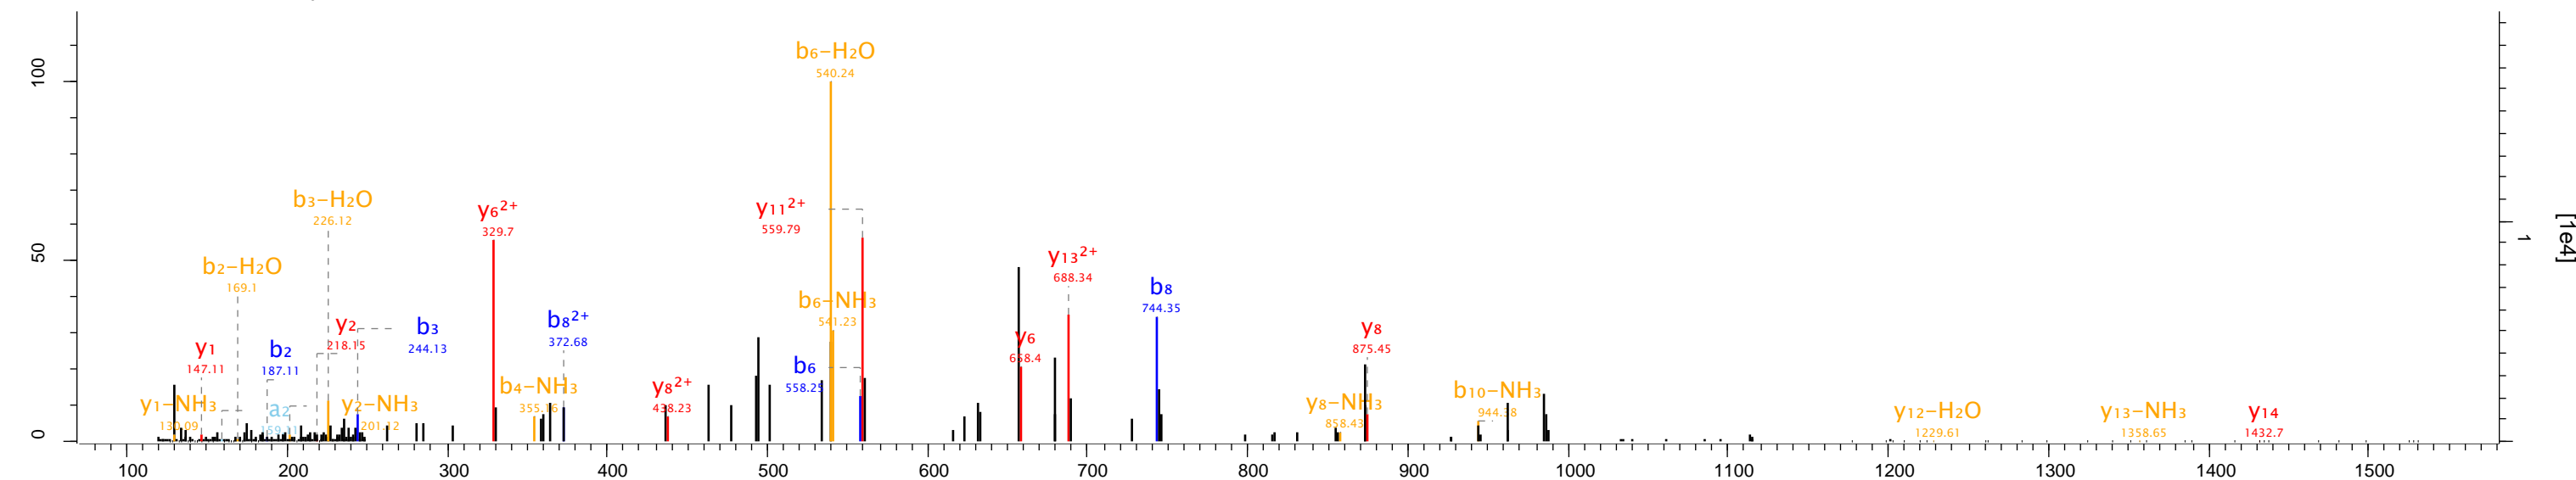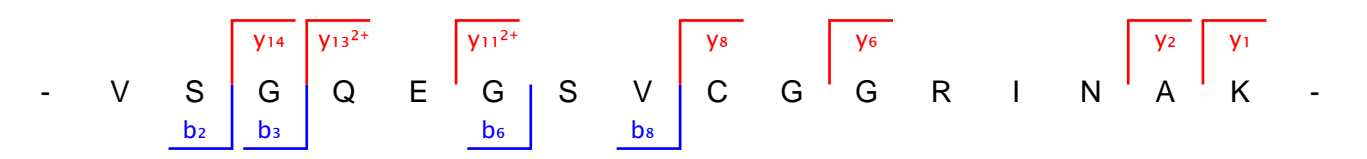

Spectral Annotation for Single-Peptide IDs in 16-cell Embryo using Q-OT-LIT

Raw file 2015-01-05\_CL02\_2Excl15sMaxInj70 Scan 8173 Method ITMS; HCD Score 114.89 m/z 572.8

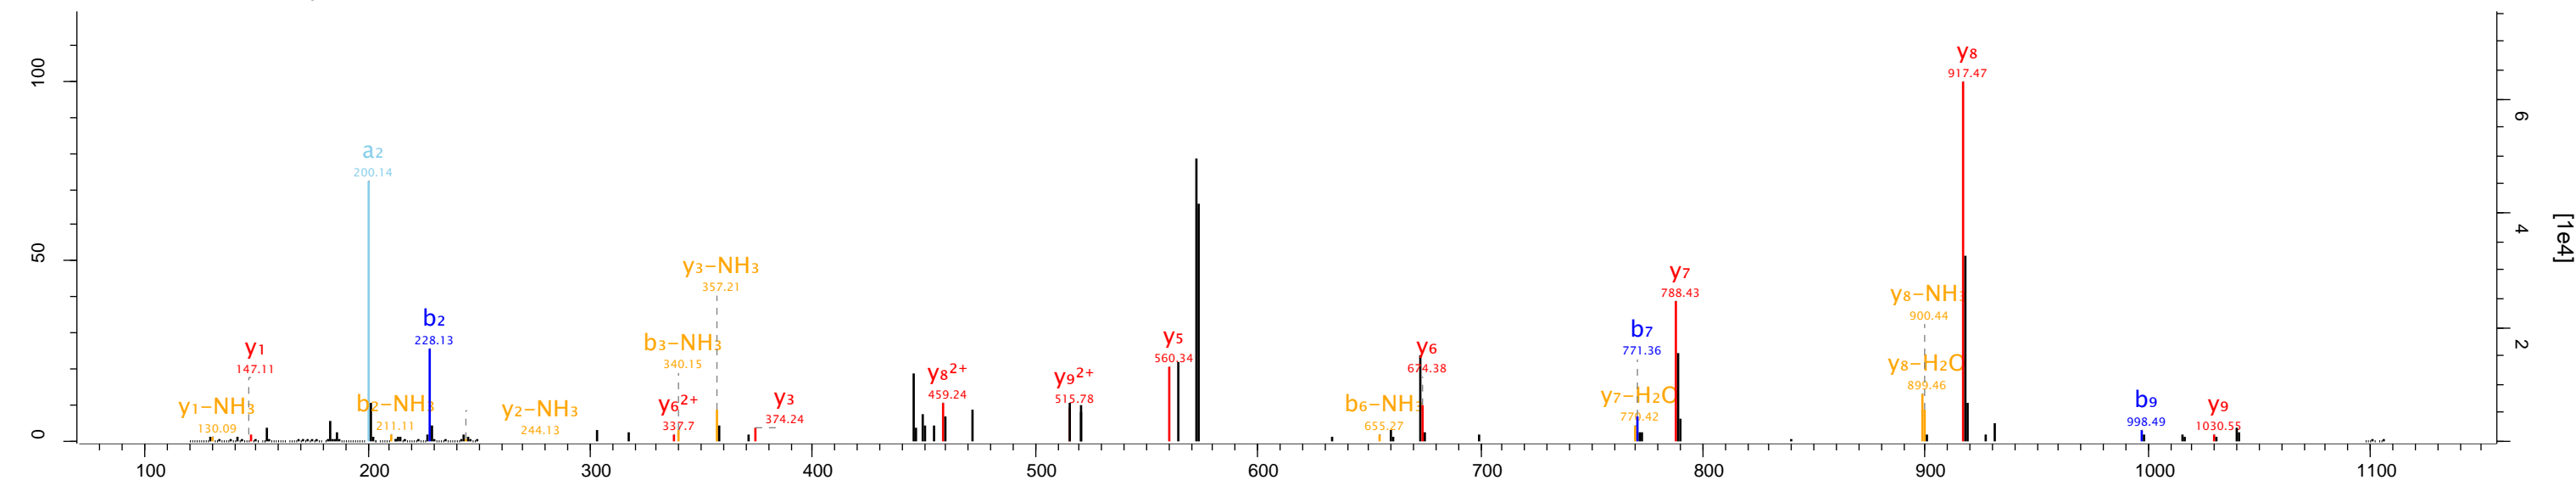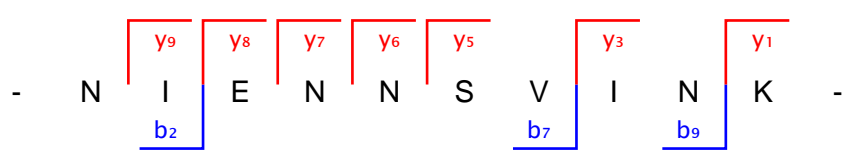

Raw file 2015-01-05\_CL02\_2Excl15sMaxInj70 Scan 8177 Method ITMS; HCD Score 97.6 m/z 382.2

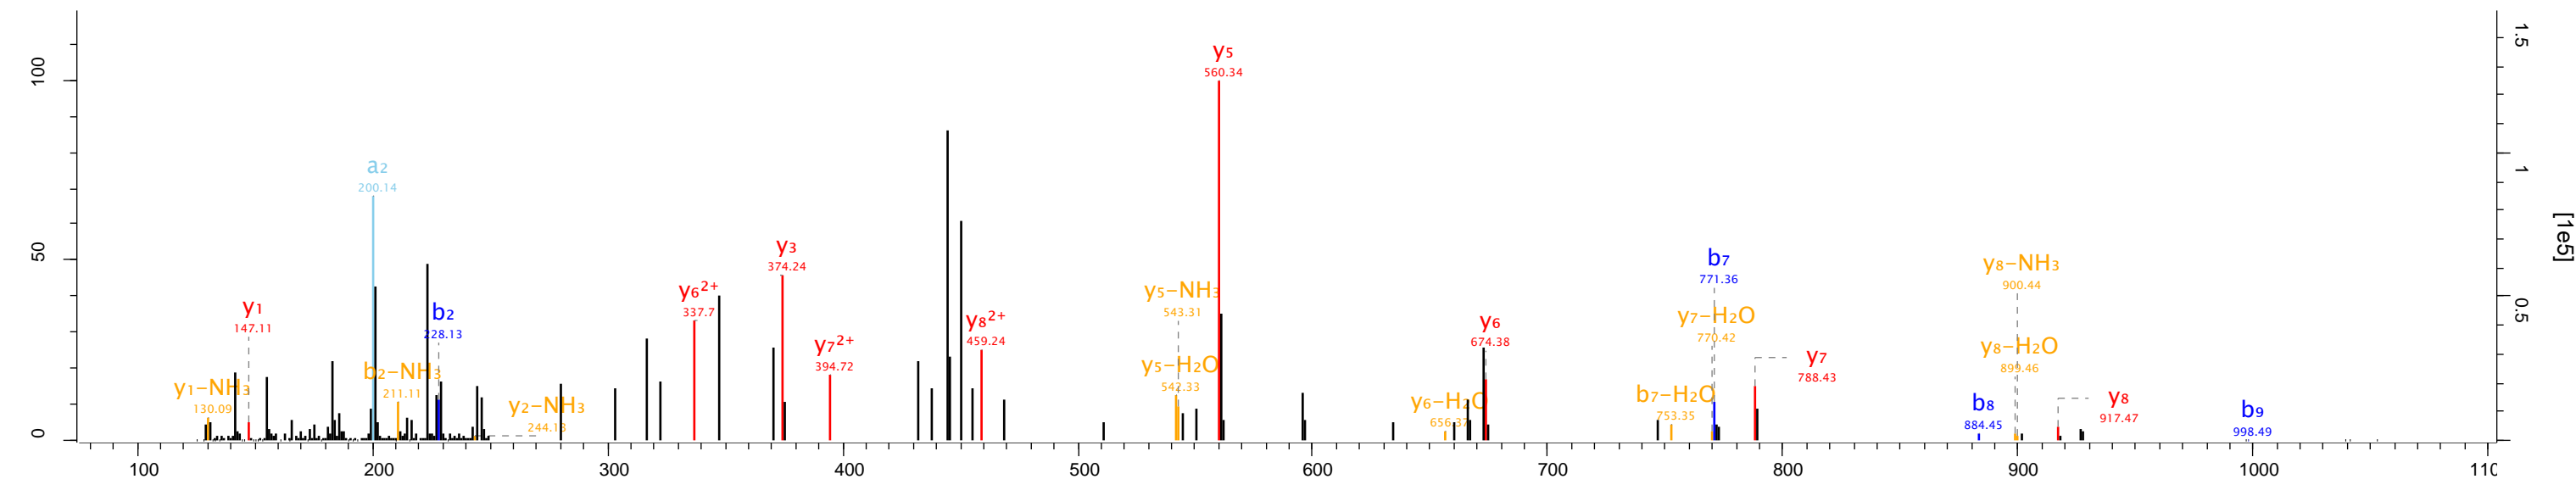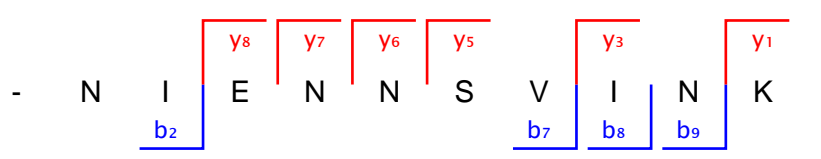



Raw file 2015-01-05\_CL02\_2Excl15sMaxInj70 Scan 8187 Method ITMS; HCD Score 125.74 m/z 572.8

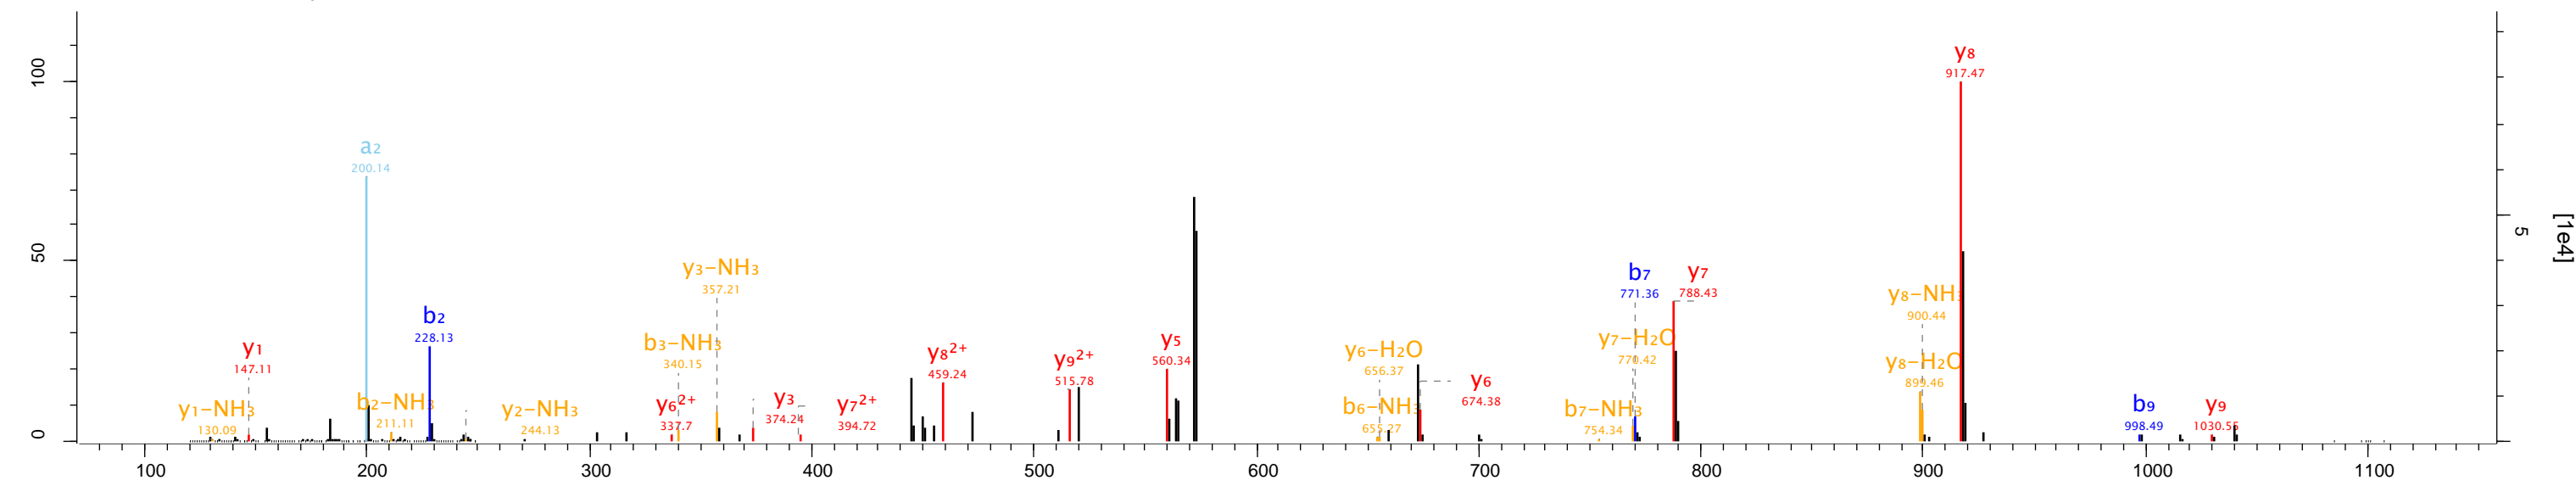

Spectral Annotation for Single-Peptide IDs in 16-cell Embryo using Q-OT-LIT

Raw file 2015-01-05\_CL02\_2Excl15sMaxInj70 Scan 8405 Method ITMS; HCD Score 54.26 m/z 420.54

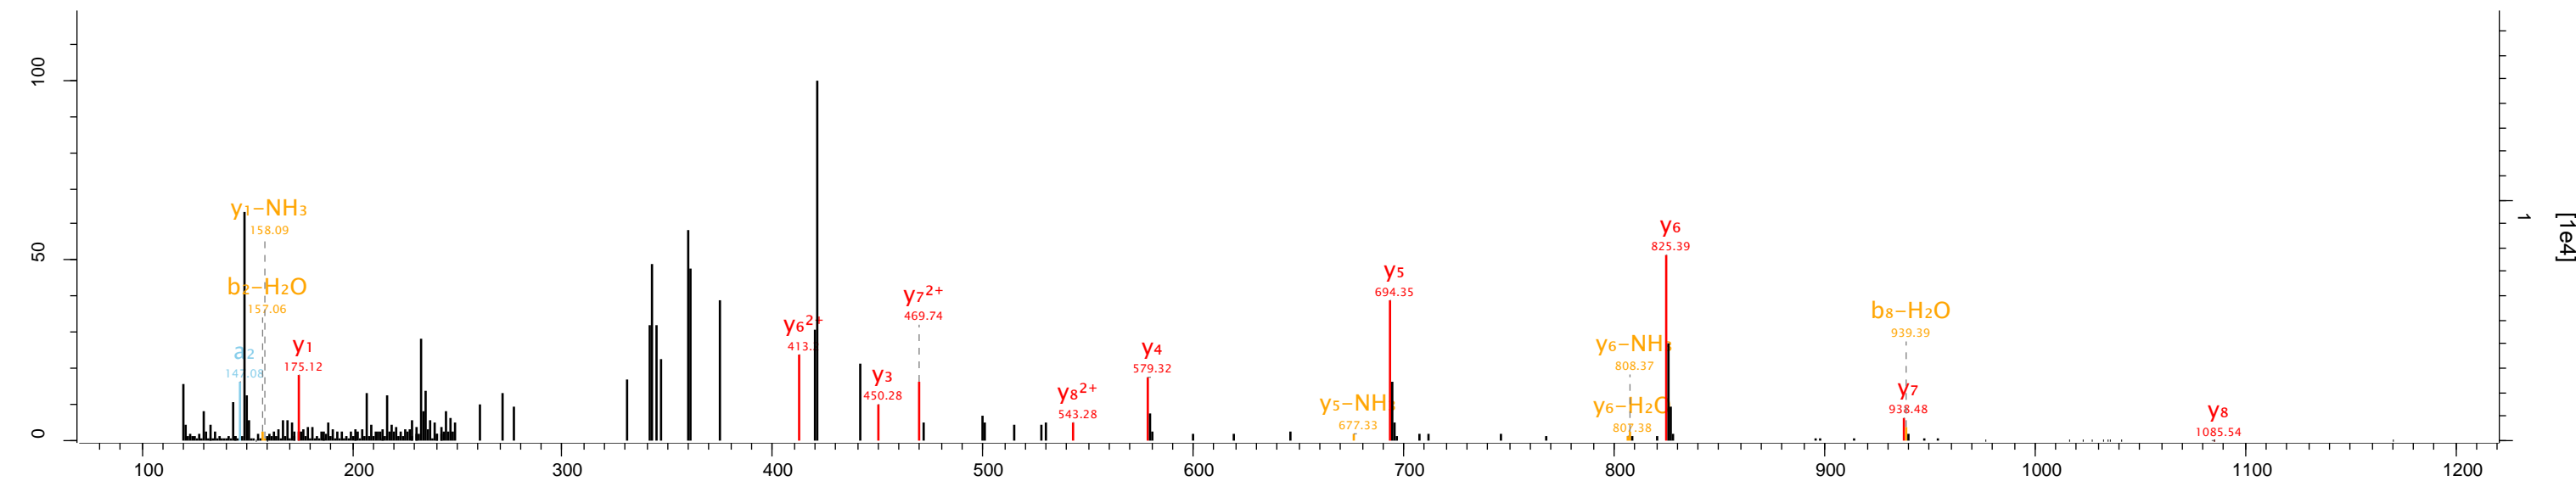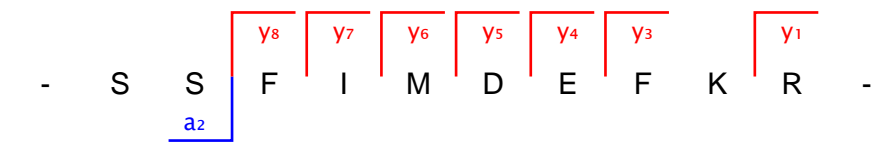

Raw file 2015-01-05\_CL02\_2Excl15sMaxInj70 Scan 8412 Method ITMS; HCD Score 54.86 m/z 487.02

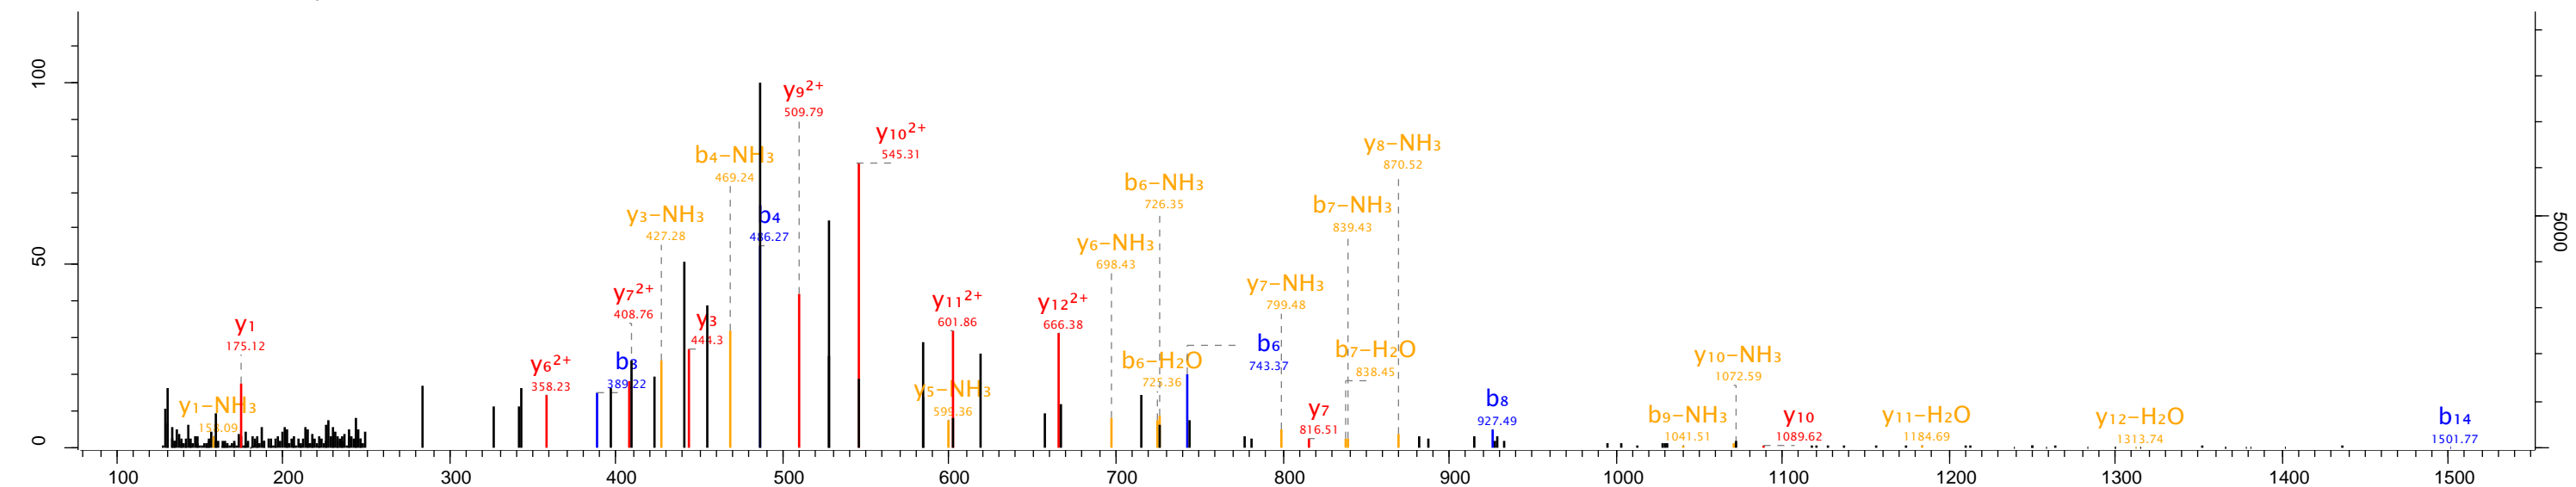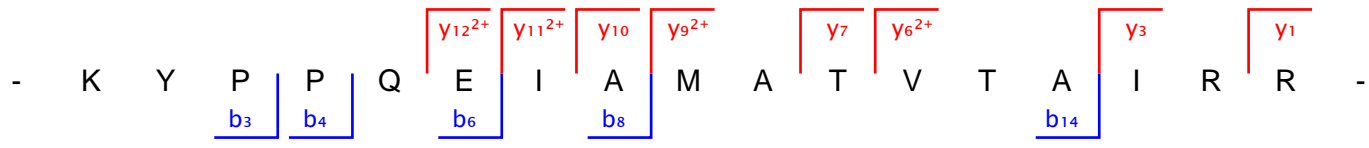

Spectral Annotation for Single-Peptide IDs in 16-cell Embryo using Q-OT-LIT

Raw file 2015-01-05\_CL02\_2Excl15sMaxInj70 Scan 8510 Method ITMS; HCD Score 38.59 m/z 657.84

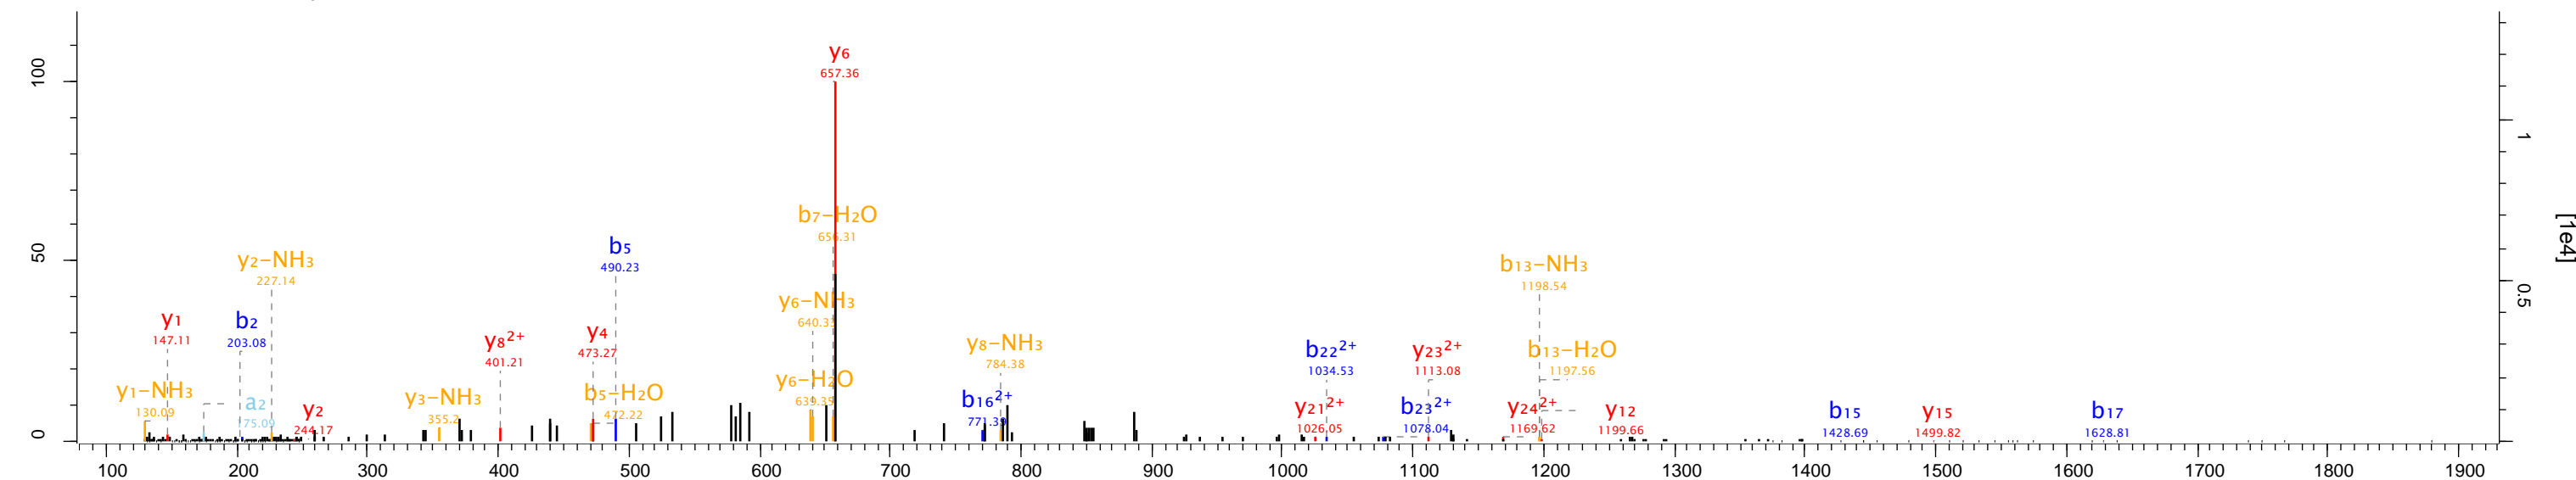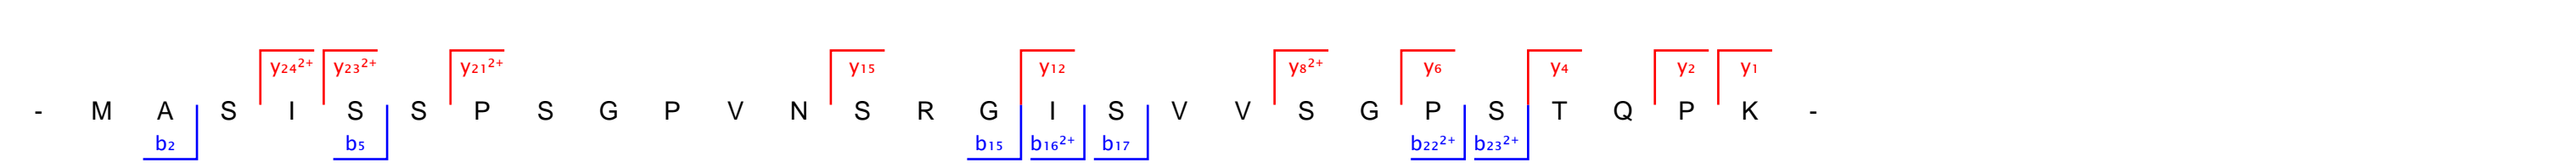

Raw file 2015-01-05\_CL02\_2Excl15sMaxInj70 Scan 8626 Method ITMS; HCD Score 58.16 m/z 641.35

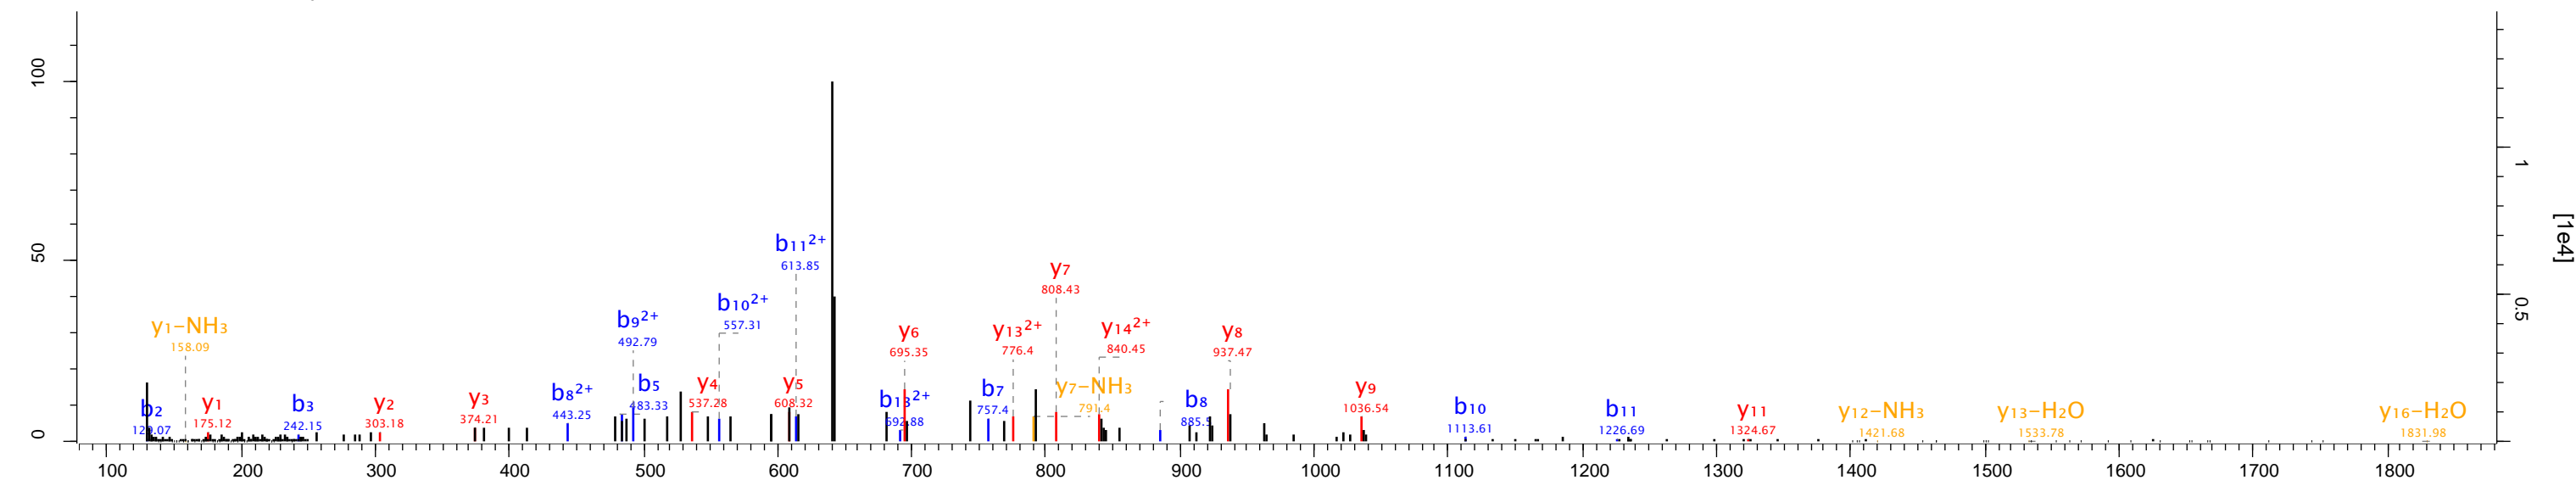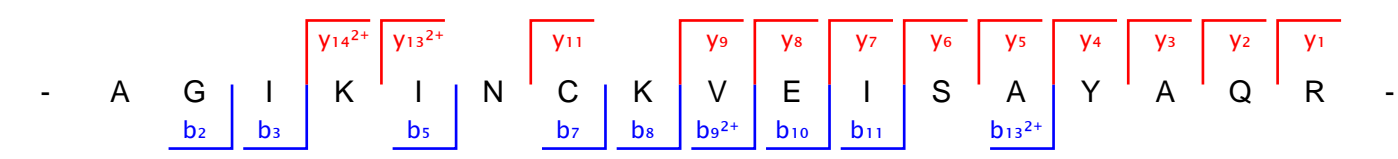

Spectral Annotation for Single-Peptide IDs in 16-cell Embryo using Q-OT-LIT

Raw file 2015-01-05\_CL02\_2Excl15sMaxInj70 Scan 8634 Method ITMS; HCD Score 63.31 m/z 481.26

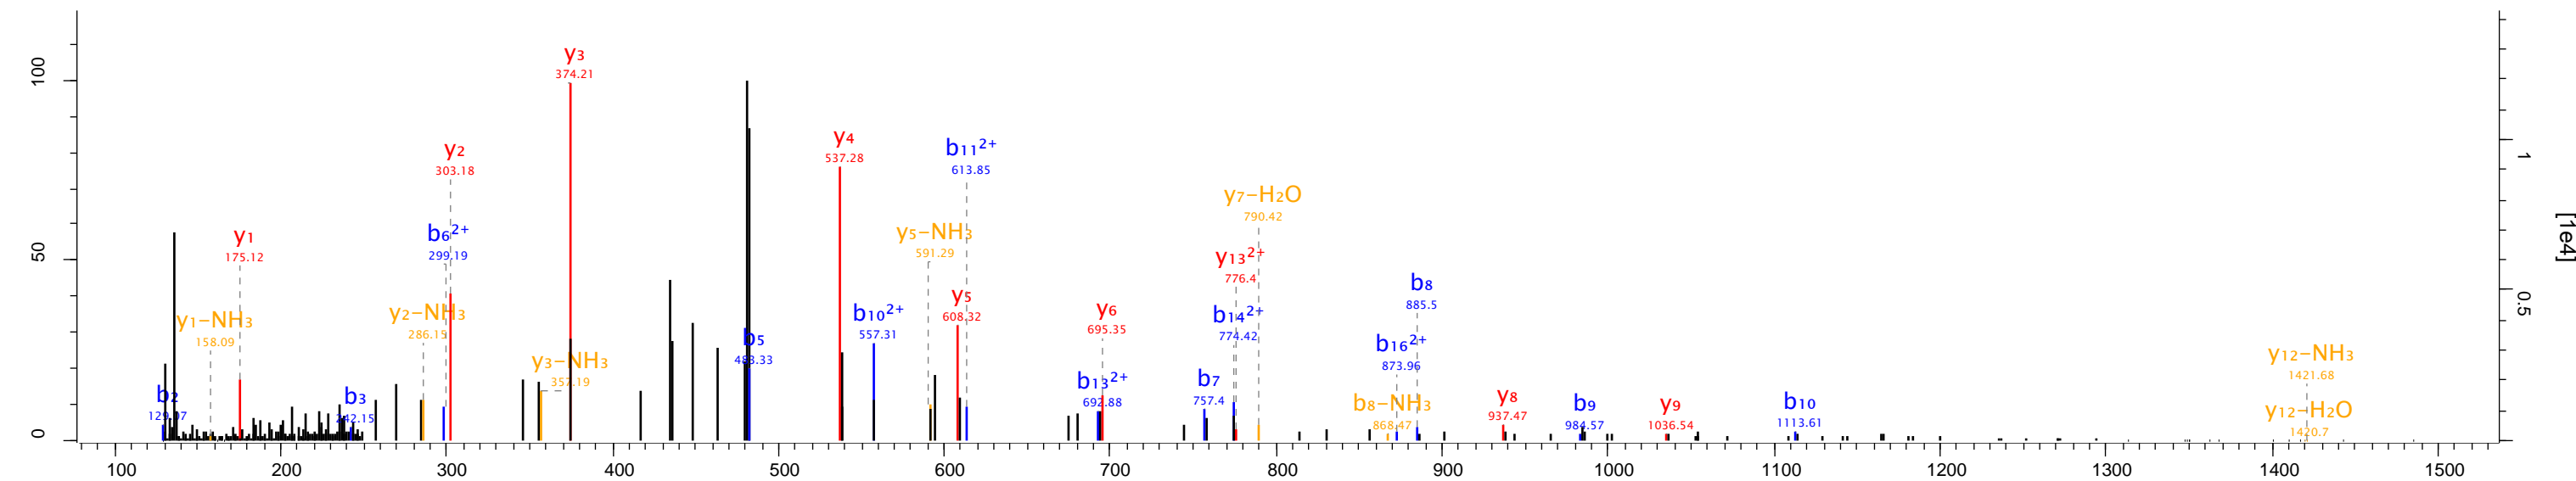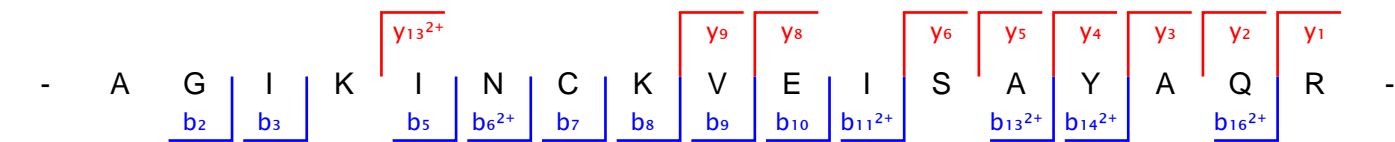

Spectral Annotation for Single-Peptide IDs in 16-cell Embryo using Q-OT-LIT

C. Lombard-Banek, S. Reddy, S. A. Moody, P. Nemes, Mol. Cell. Prot. 2016

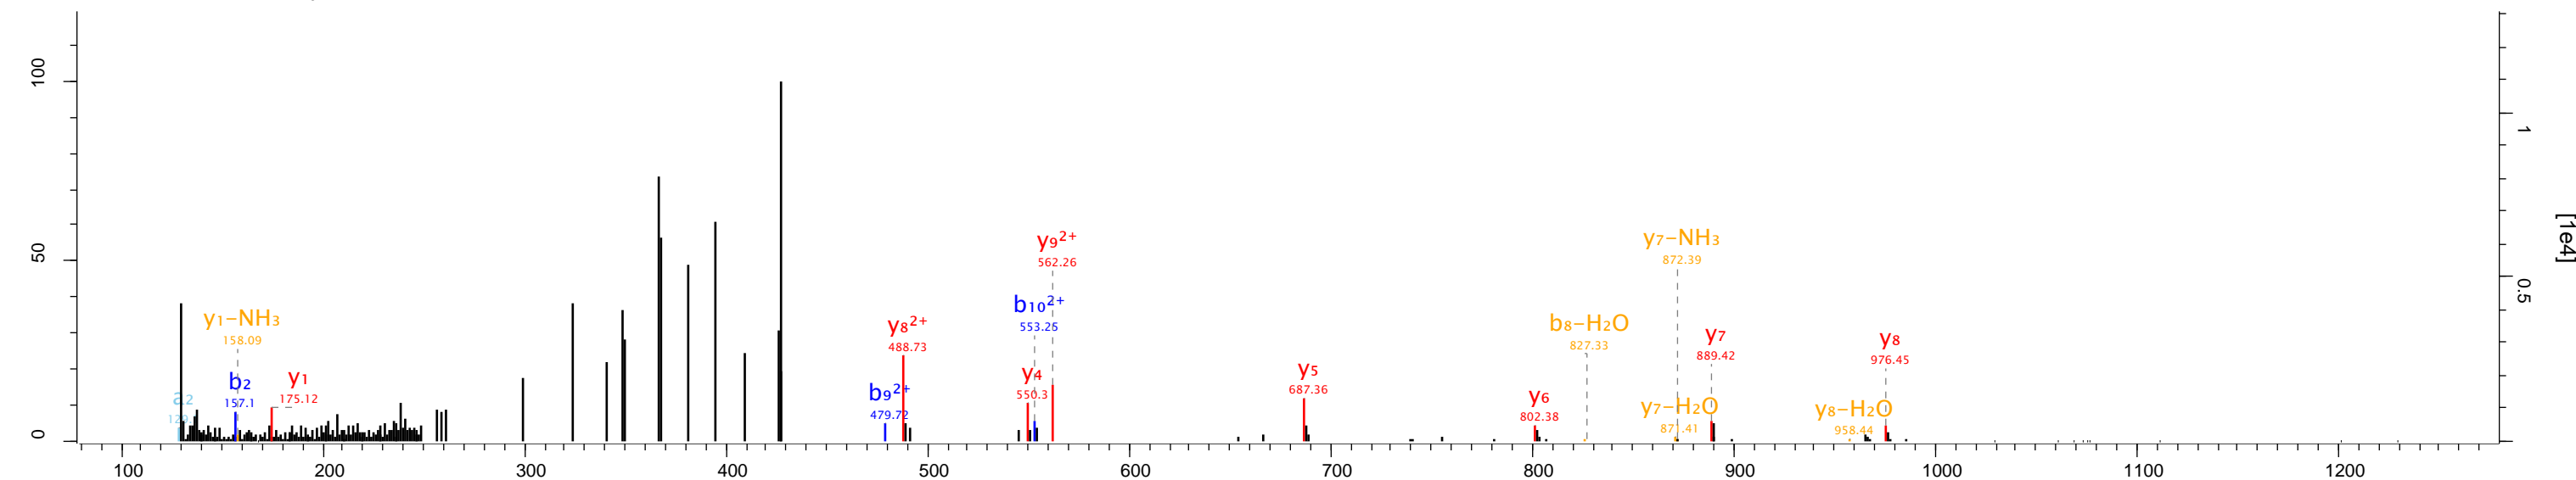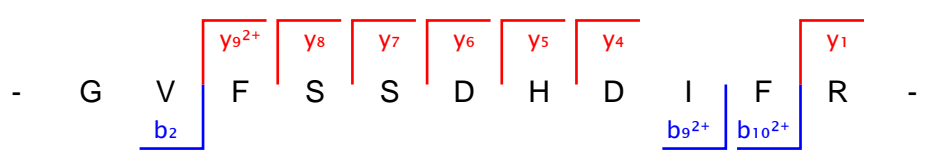

Raw file 2015-01-05\_CL02\_2Excl15sMaxInj70 Scan 8710 Method ITMS; HCD Score 62.17 m/z 427.2

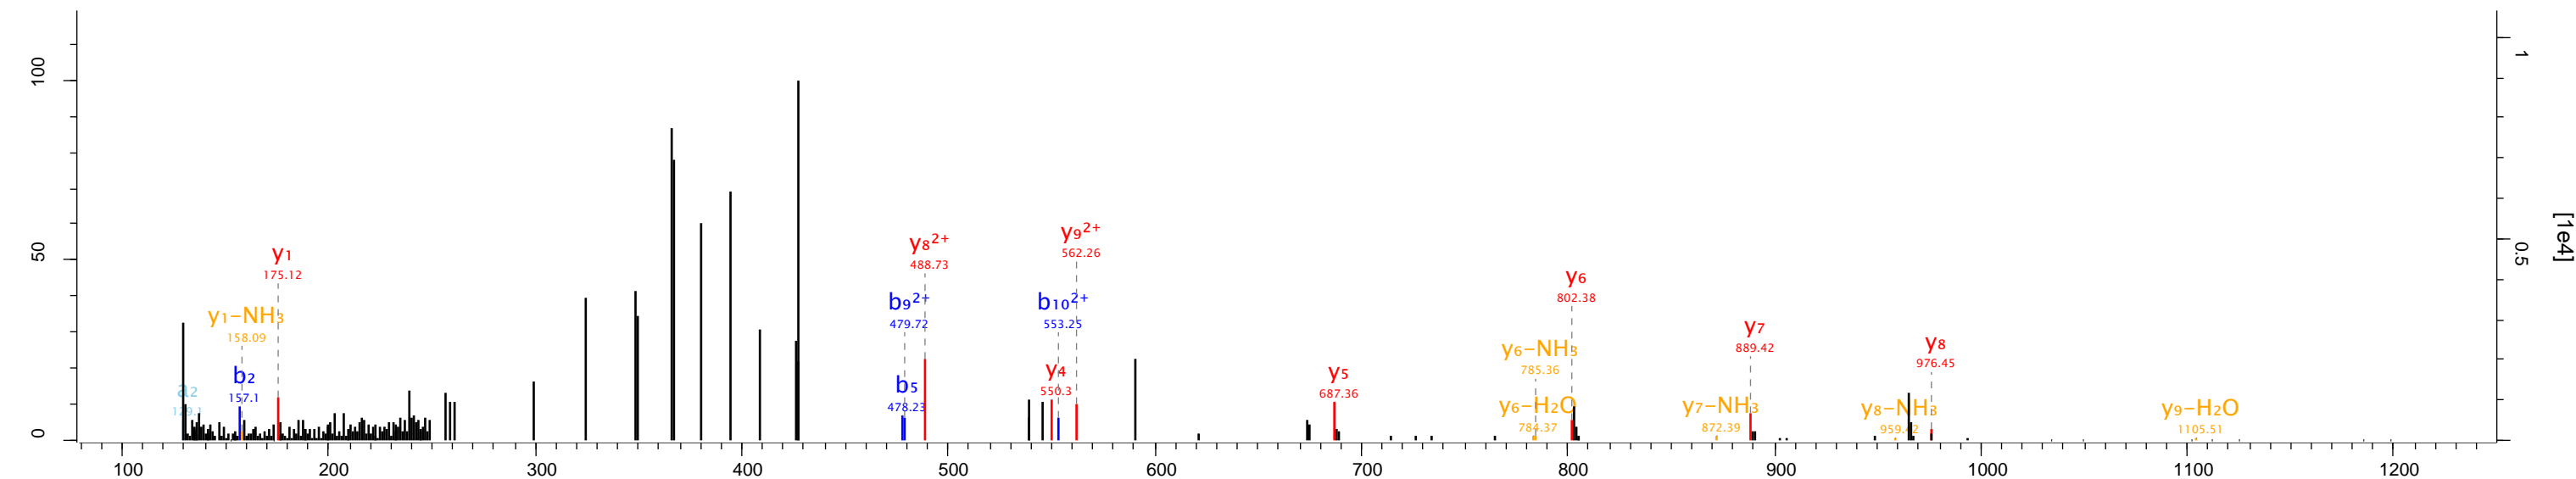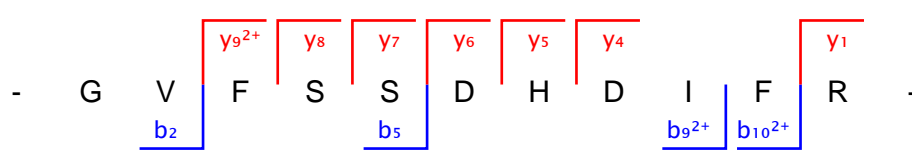



Raw file 2015-01-05\_CL02\_2Excl15sMaxInj70 Scan 8754 Method ITMS; HCD Score 78.1 m/z 427.55

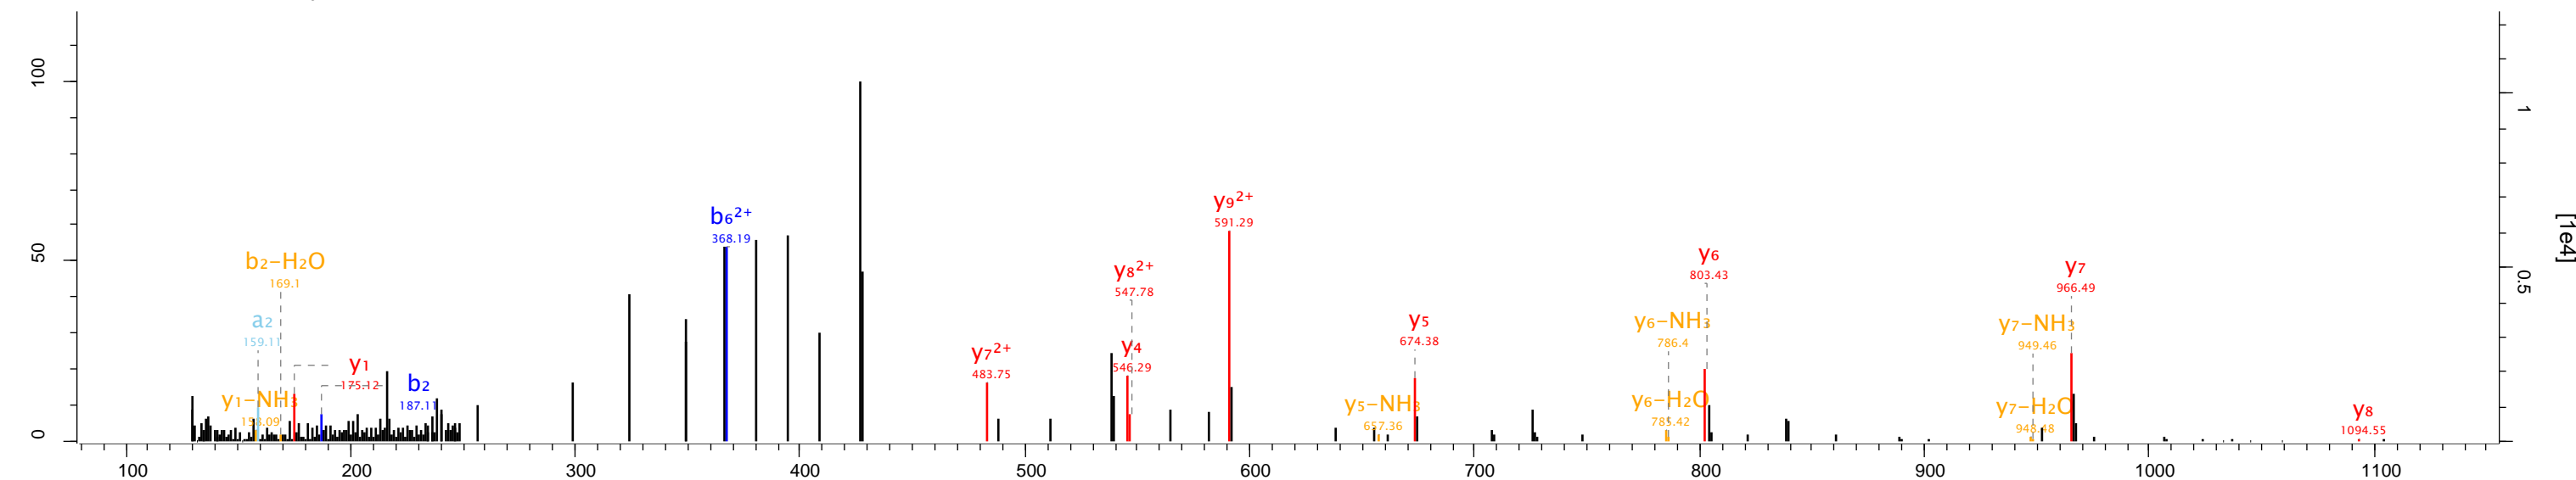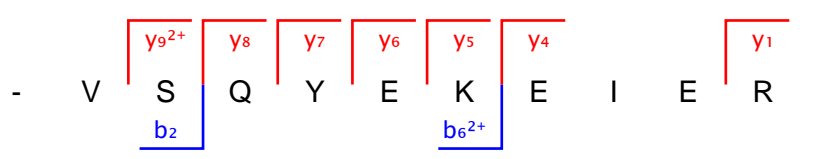

Spectral Annotation for Single-Peptide IDs in 16-cell Embryo using Q-OT-LIT

Raw file 2015-01-05\_CL02\_2Excl15sMaxInj70 Scan 8768 Method ITMS; HCD Score 89.03 m/z 427.55

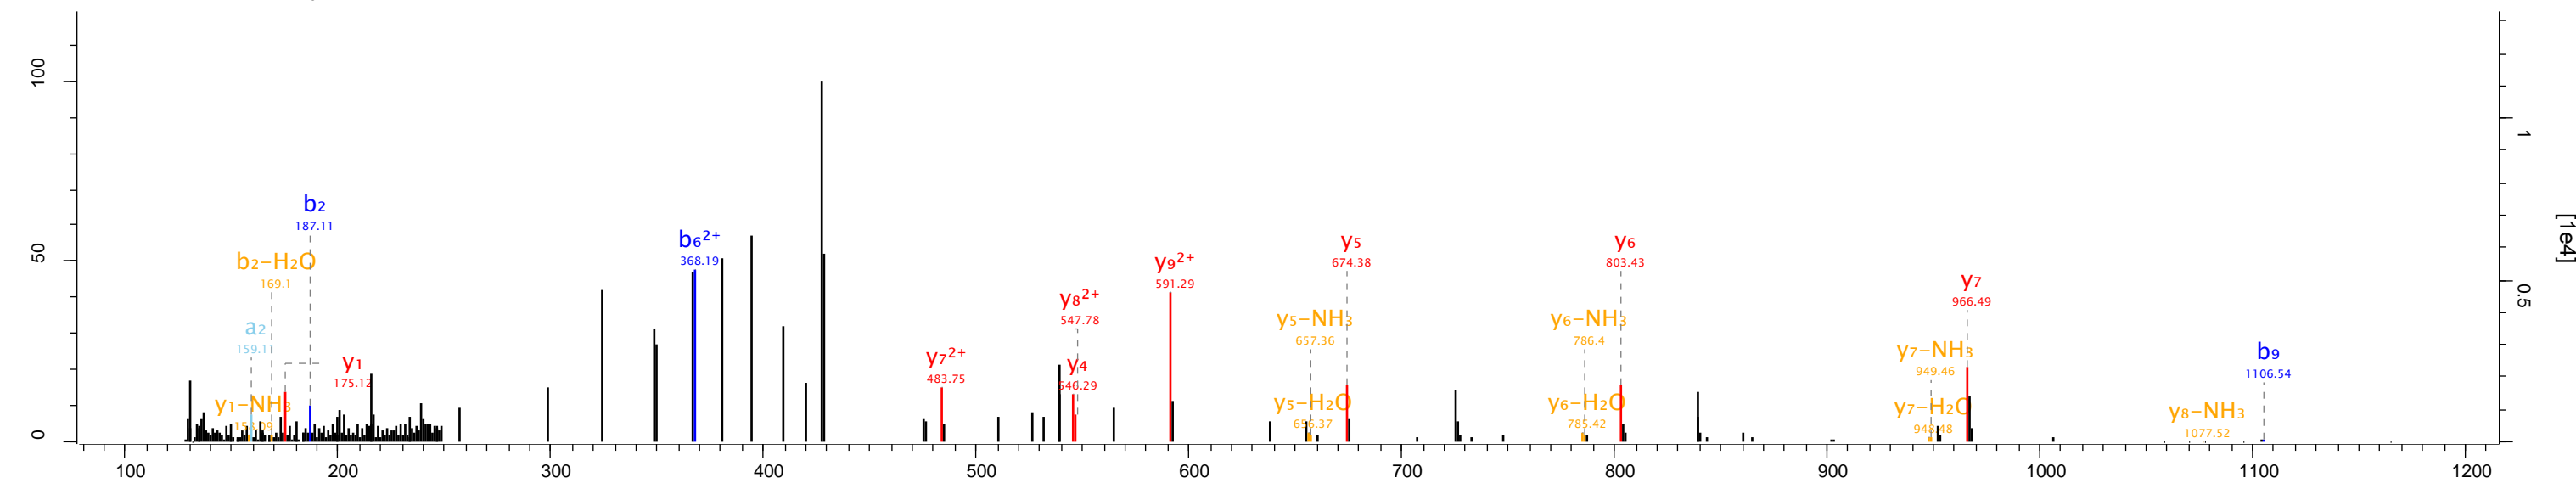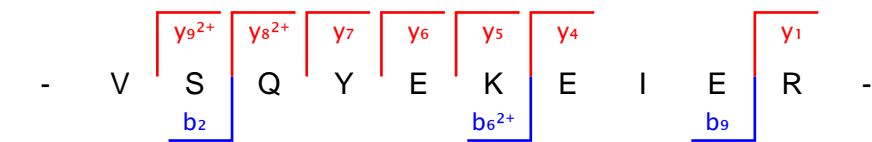

Spectral Annotation for Single-Peptide IDs in 16-cell Embryo using Q-OT-LIT

Raw file 2015-01-05\_CL02\_2Excl15sMaxInj70 Scan 9052 Method ITMS; HCD Score 54.2 m/z 412.57

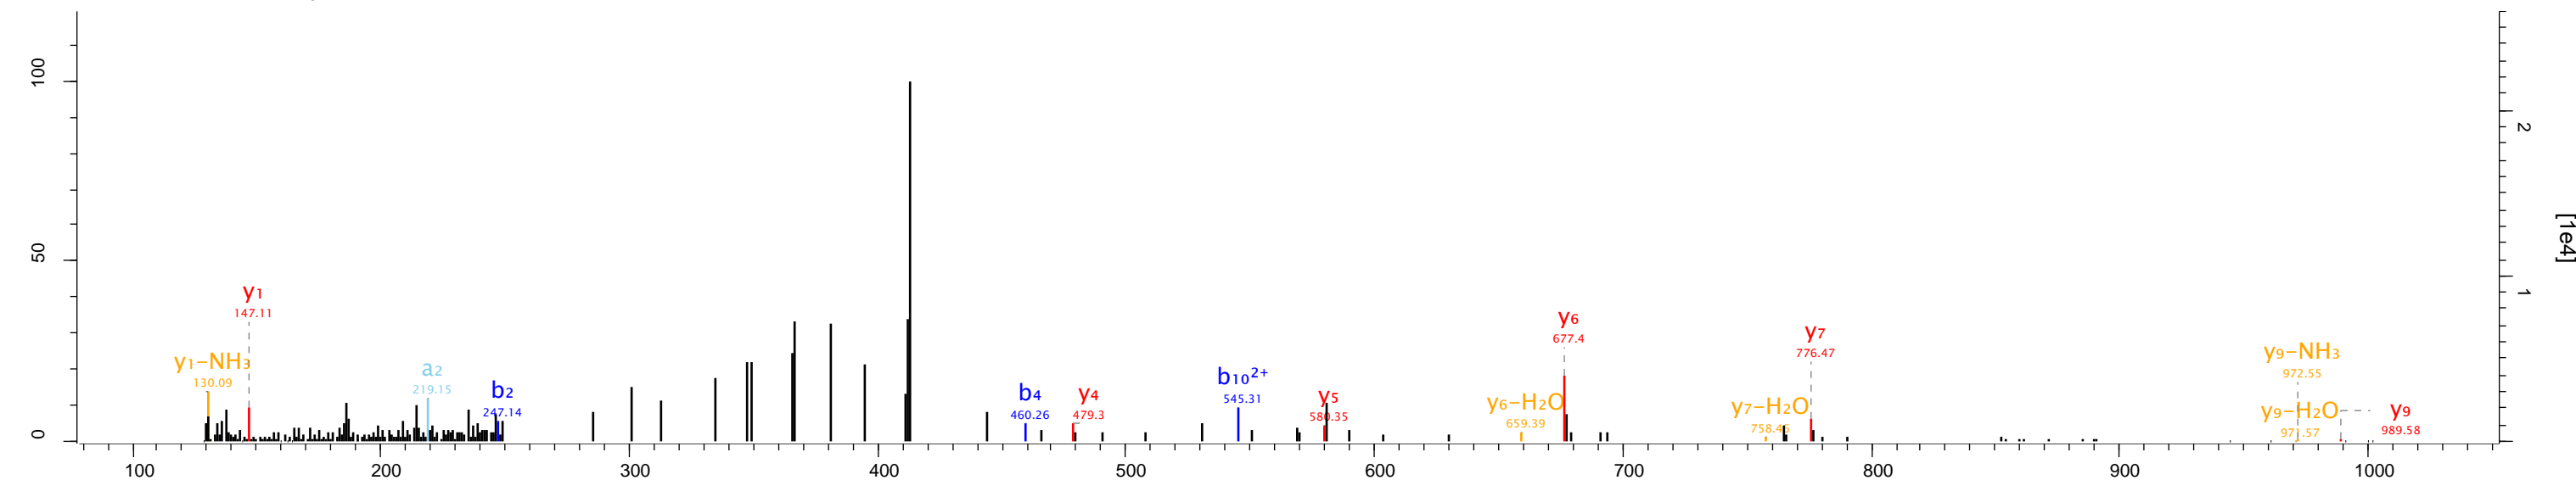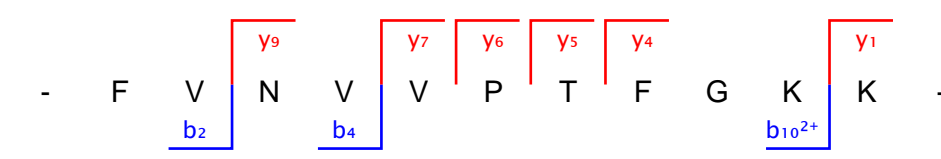

Raw file 2015-01-05\_CL02\_2Excl15sMaxInj70 Scan 9174 Method ITMS; HCD Score 62.17 m/z 428.57

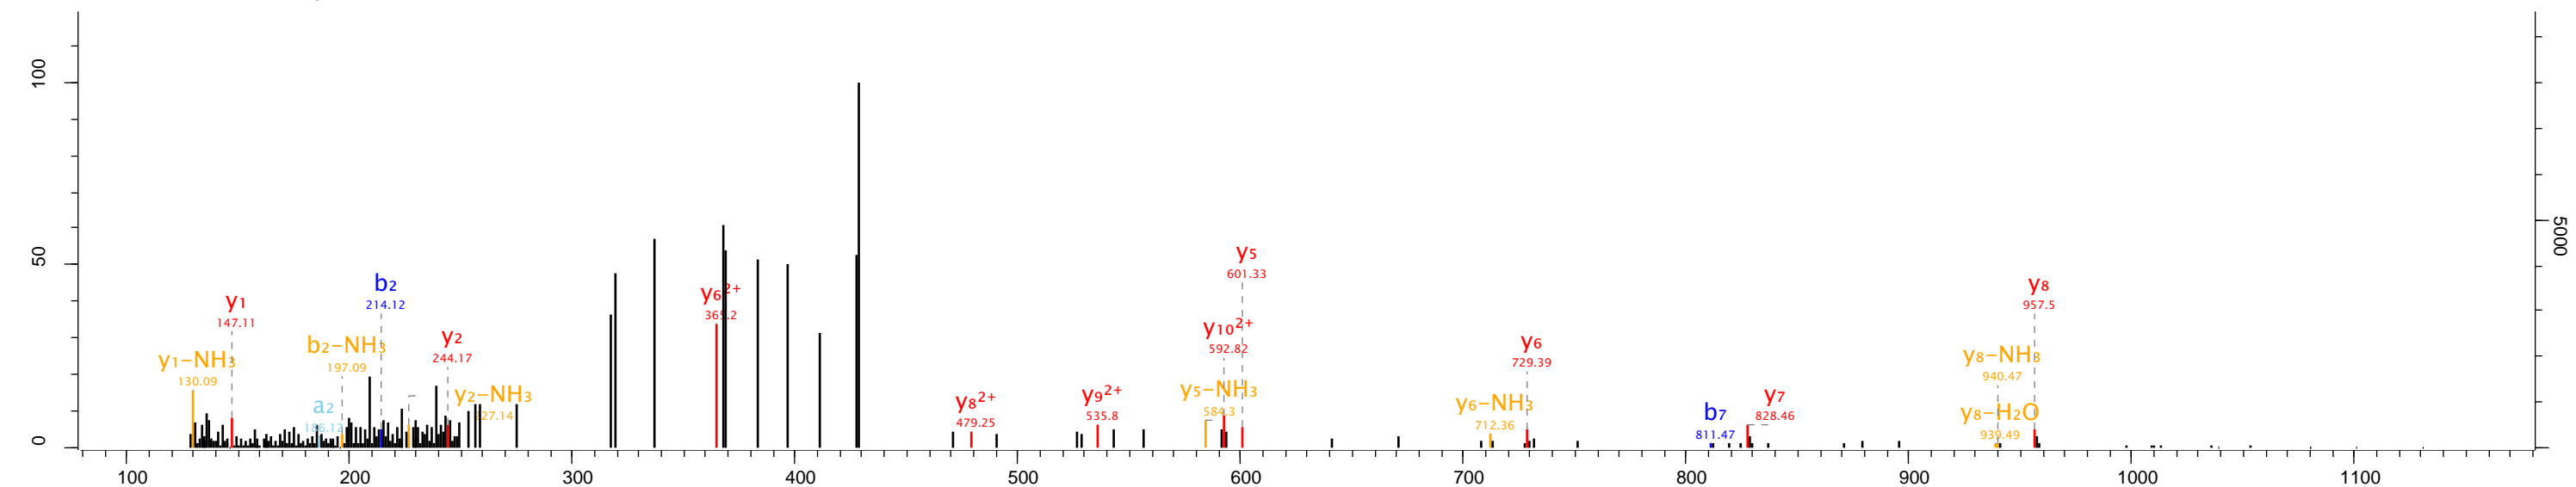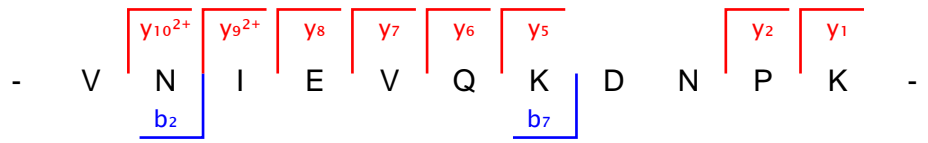

Spectral Annotation for Single-Peptide IDs in 16-cell Embryo using Q-OT-LIT

Raw file  
2015-01-05\_CL02\_2Excl15sMaxInj70

Scan 9319 Method ITMS; HCD Score 63.69 m/z 428.24

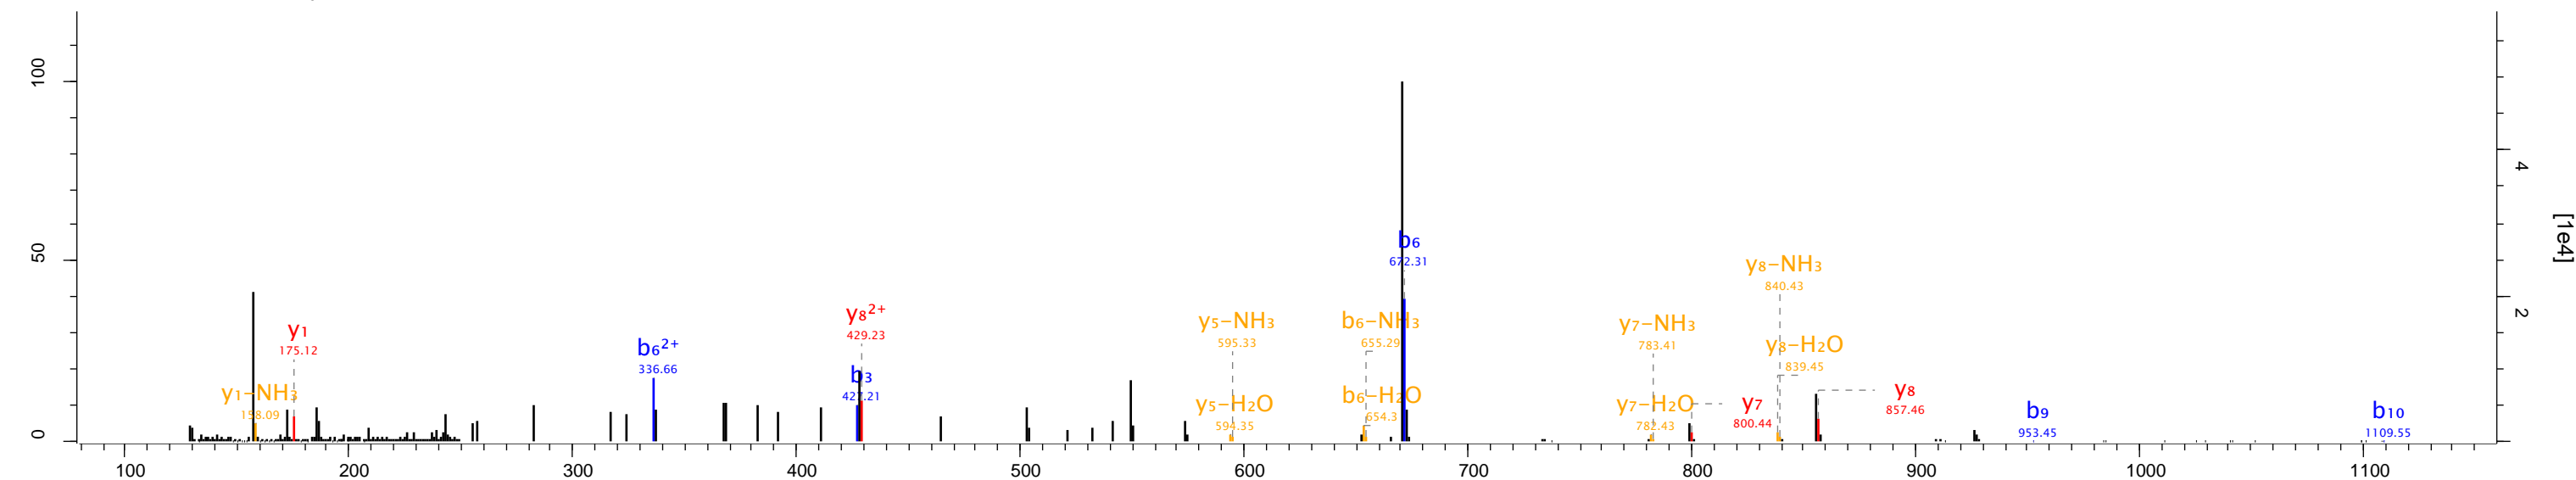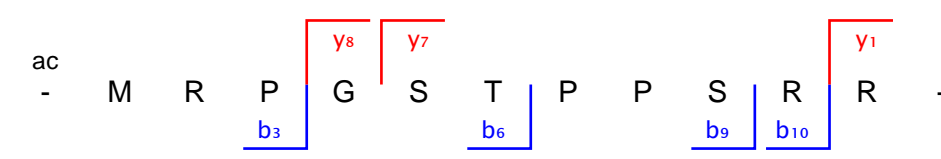

Spectral Annotation for Single-Peptide IDs in 16-cell Embryo using Q-OT-LIT

C. Lombard-Banek, S. Reddy, S. A. Moody, P. Nemes, Mol. Cell. Prot. 2016

Raw file 2015-01-05\_CL02\_2Excl15sMaxInj70 Scan 9370 Method ITMS; HCD Score 67.93 m/z 657.88

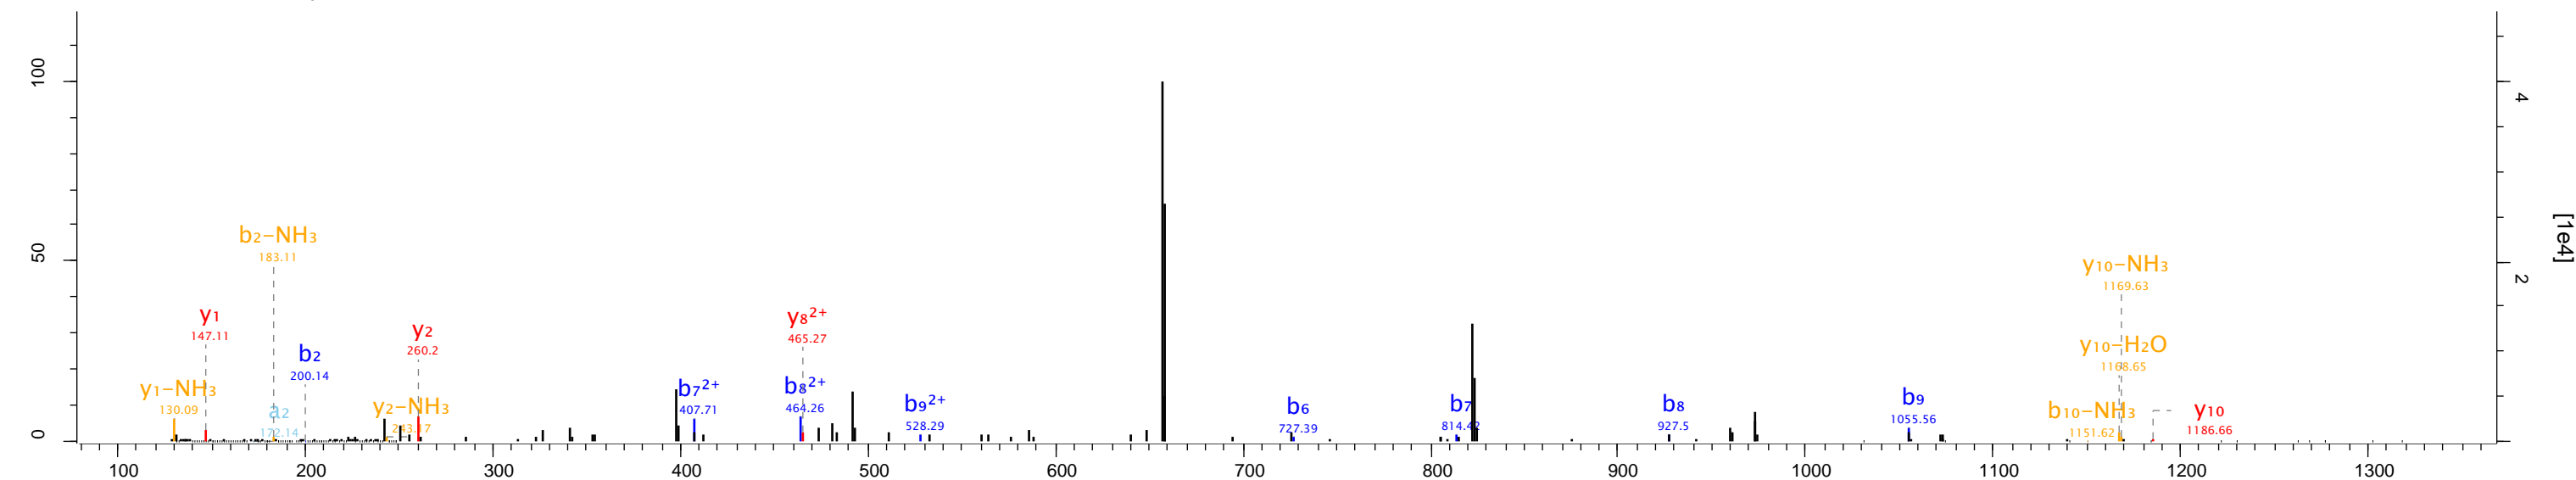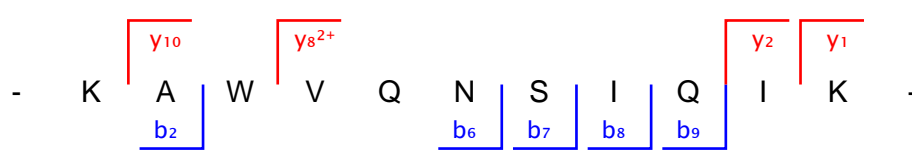

Raw file: 2015-01-05\_CL02\_2Excl15sMaxInj70  
 Scan: 9380 Method: ITMS; HCD Score: 178.99 m/z: 696.36

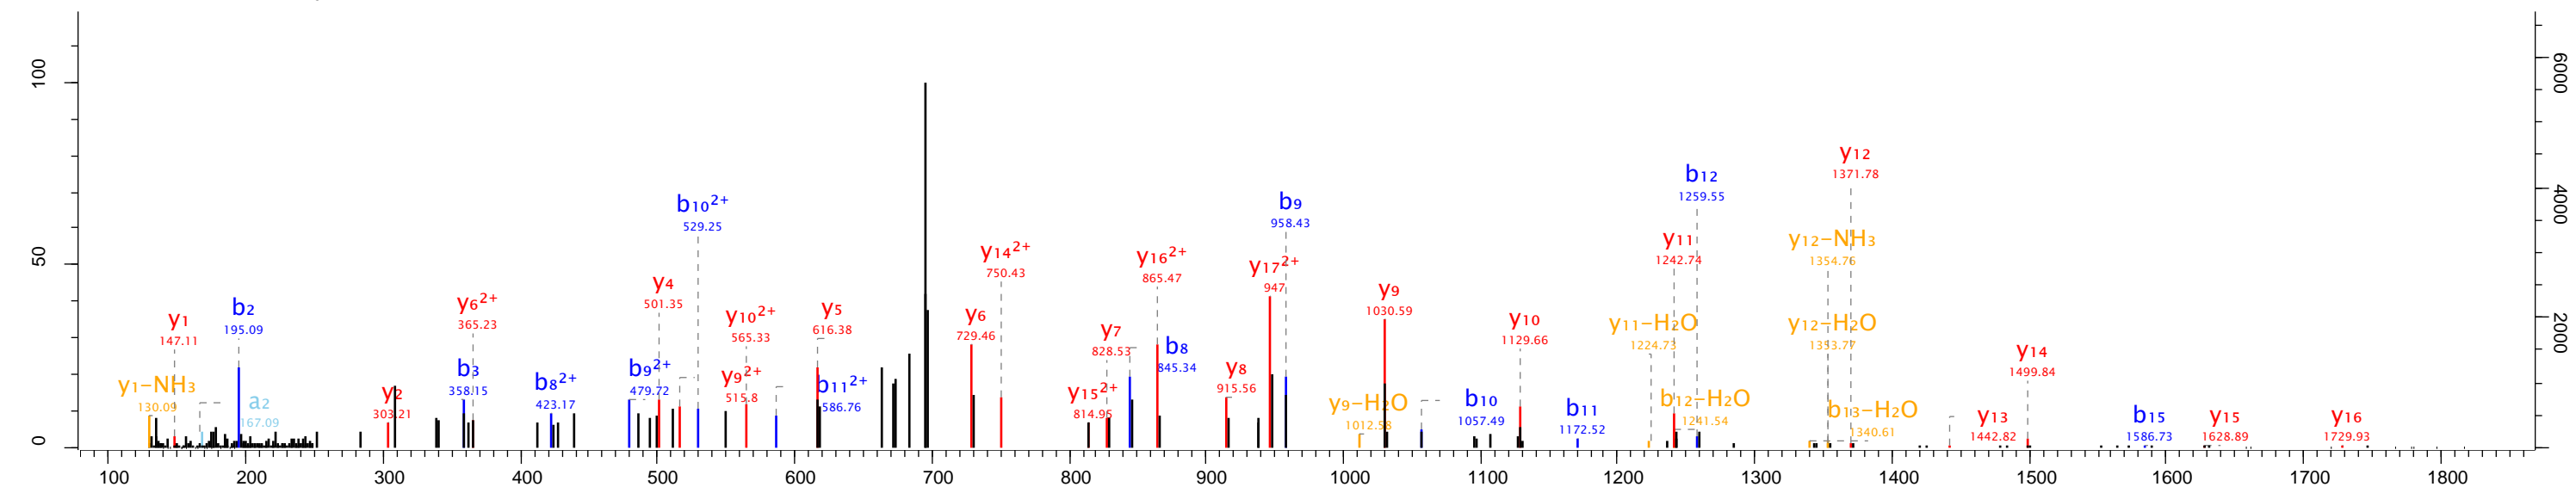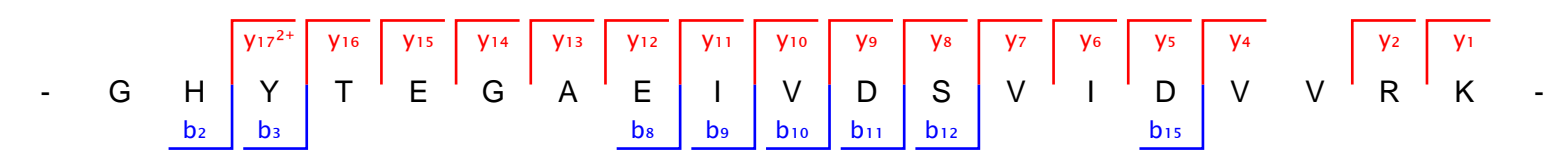

Spectral Annotation for Single-Peptide IDs in 16-cell Embryo using Q-OT-LIT

Raw file 2015-01-05\_CL02\_2Excl15sMaxInj70 Scan 9409 Method ITMS; HCD Score 60.69 m/z 657.88

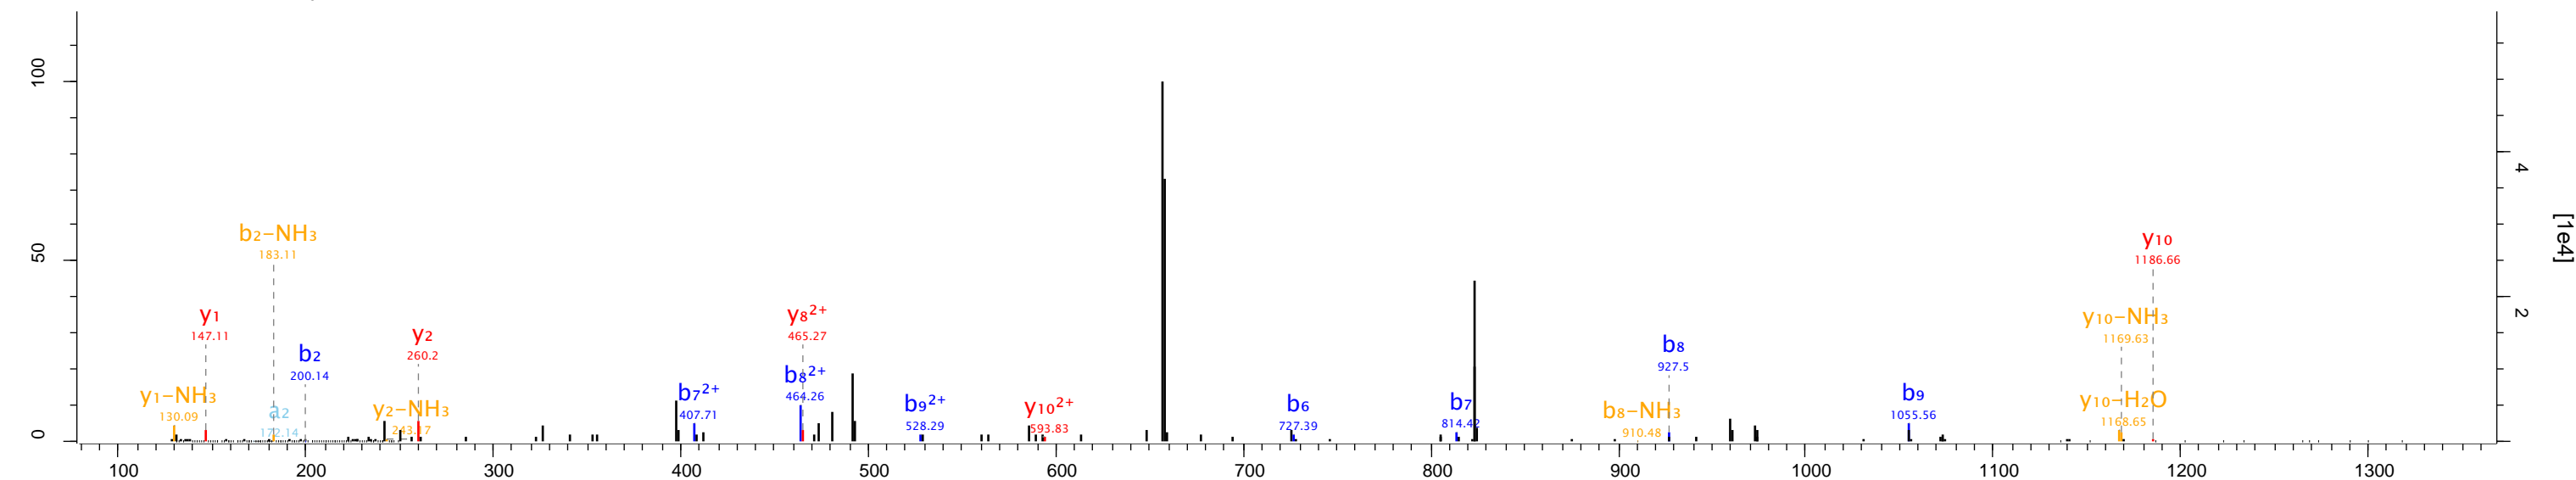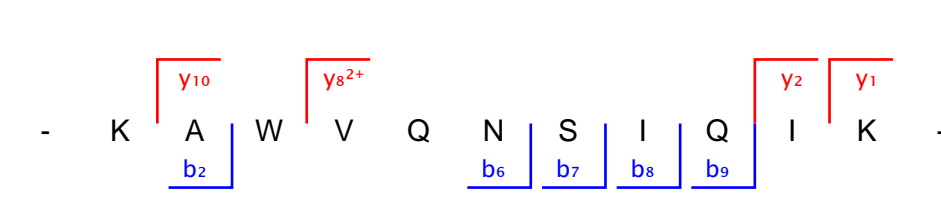



Raw file 2015-01-05\_CL02\_2Excl15sMaxInj70 Scan 9495 Method ITMS; HCD Score 108.96 m/z 528.27

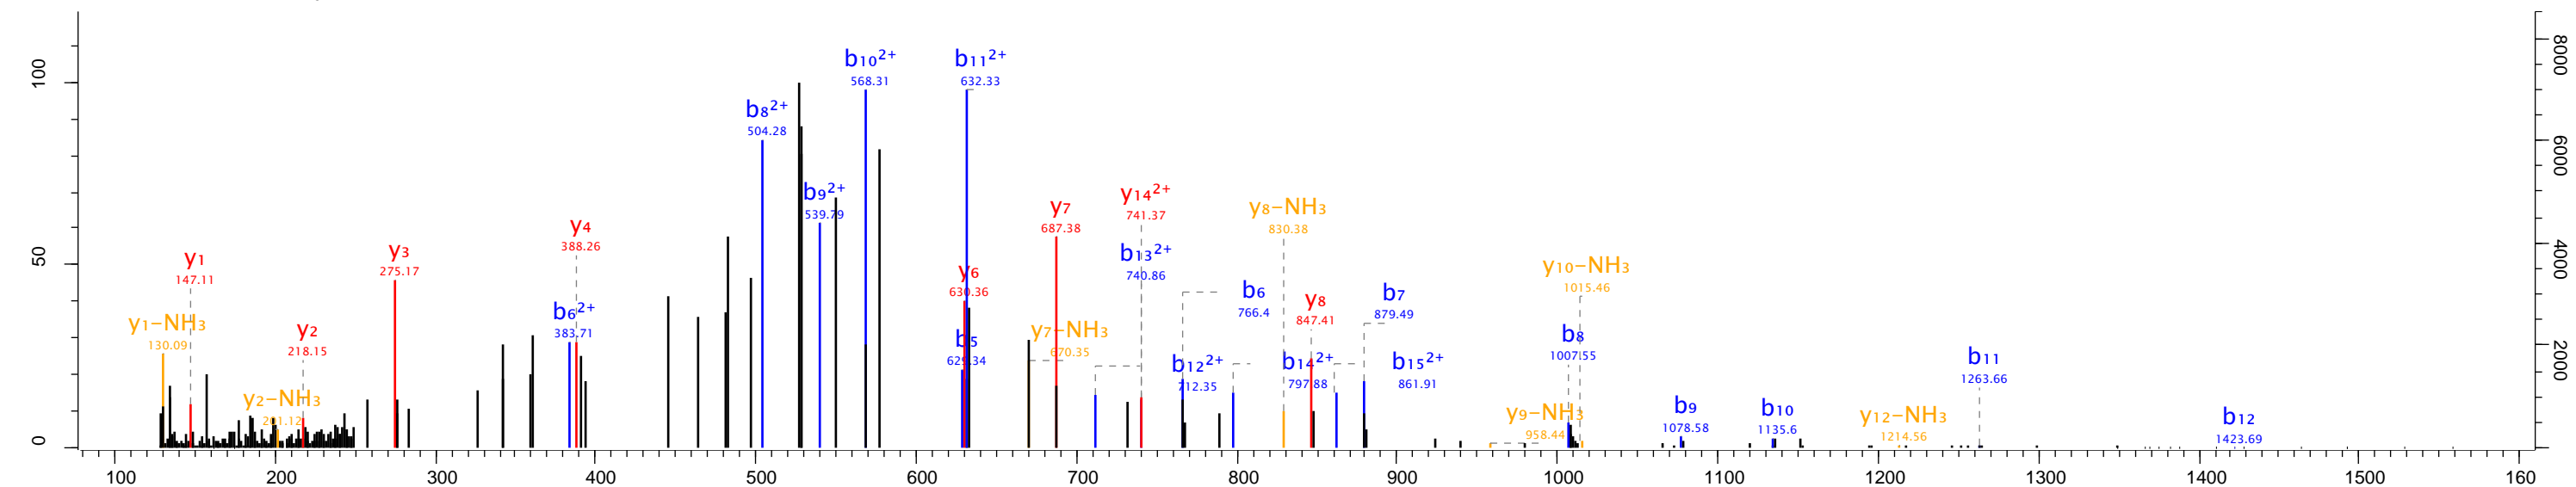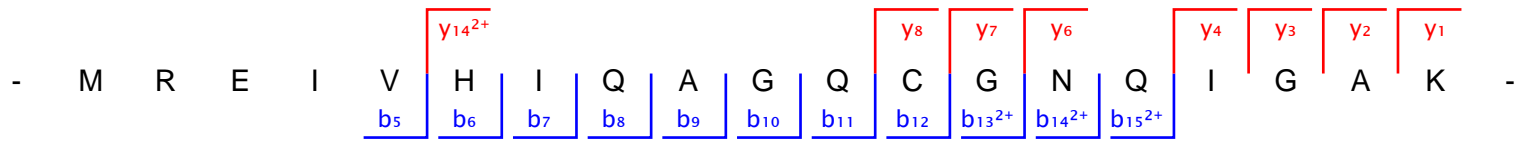

Raw file 2015-01-05\_CL02\_2Excl15sMaxInj70 Scan 9499 Method ITMS; HCD Score 84.2 m/z 657.88

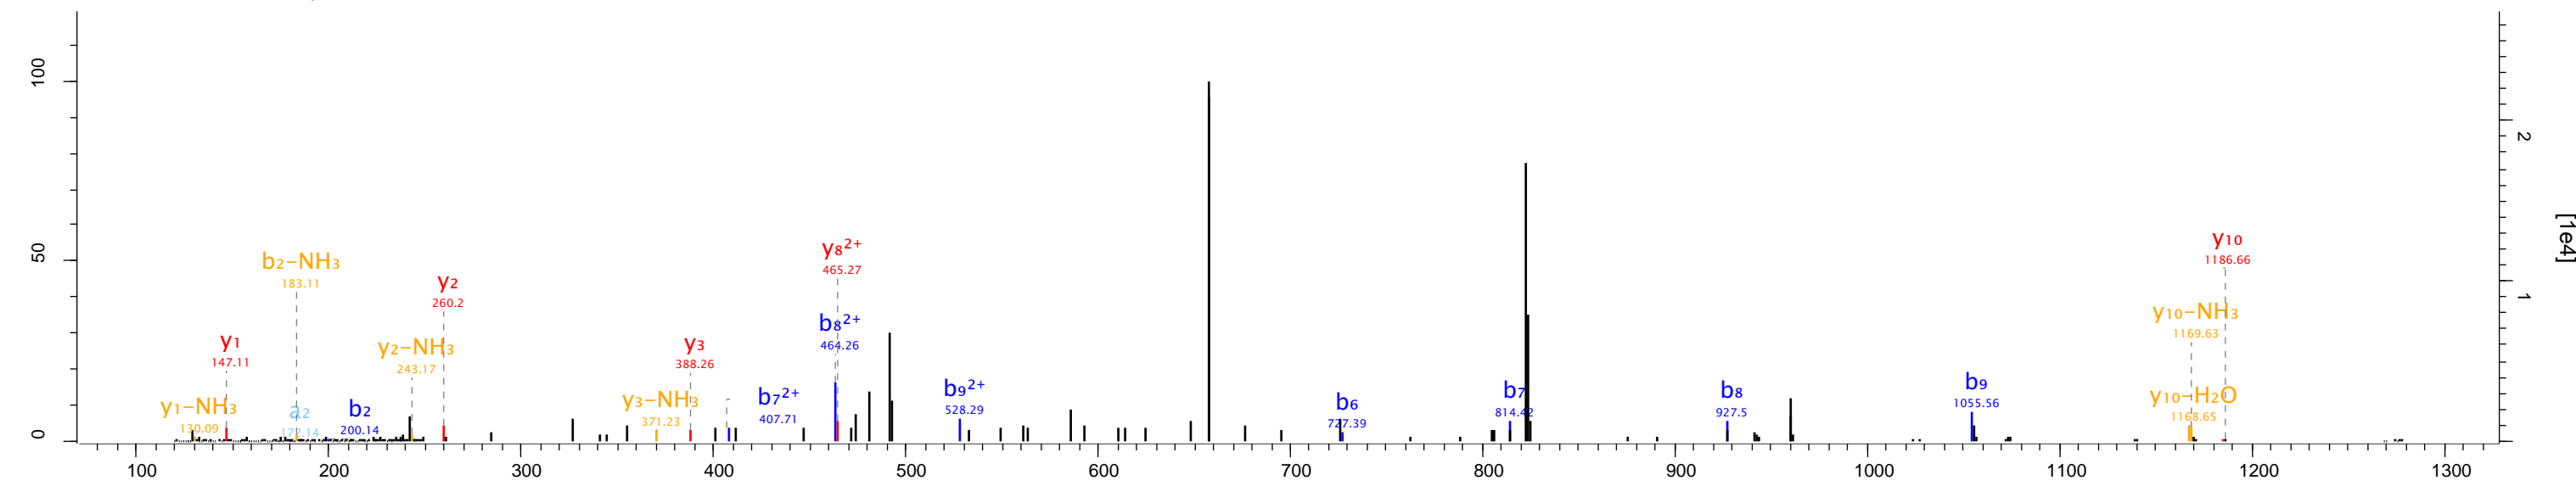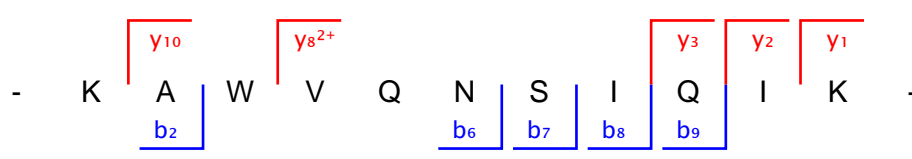

Raw file: 2015-01-05\_CL02\_2Excl15sMaxInj70  
 Scan: 9529 Method: ITMS; HCD Score: 47.08 m/z: 522.77

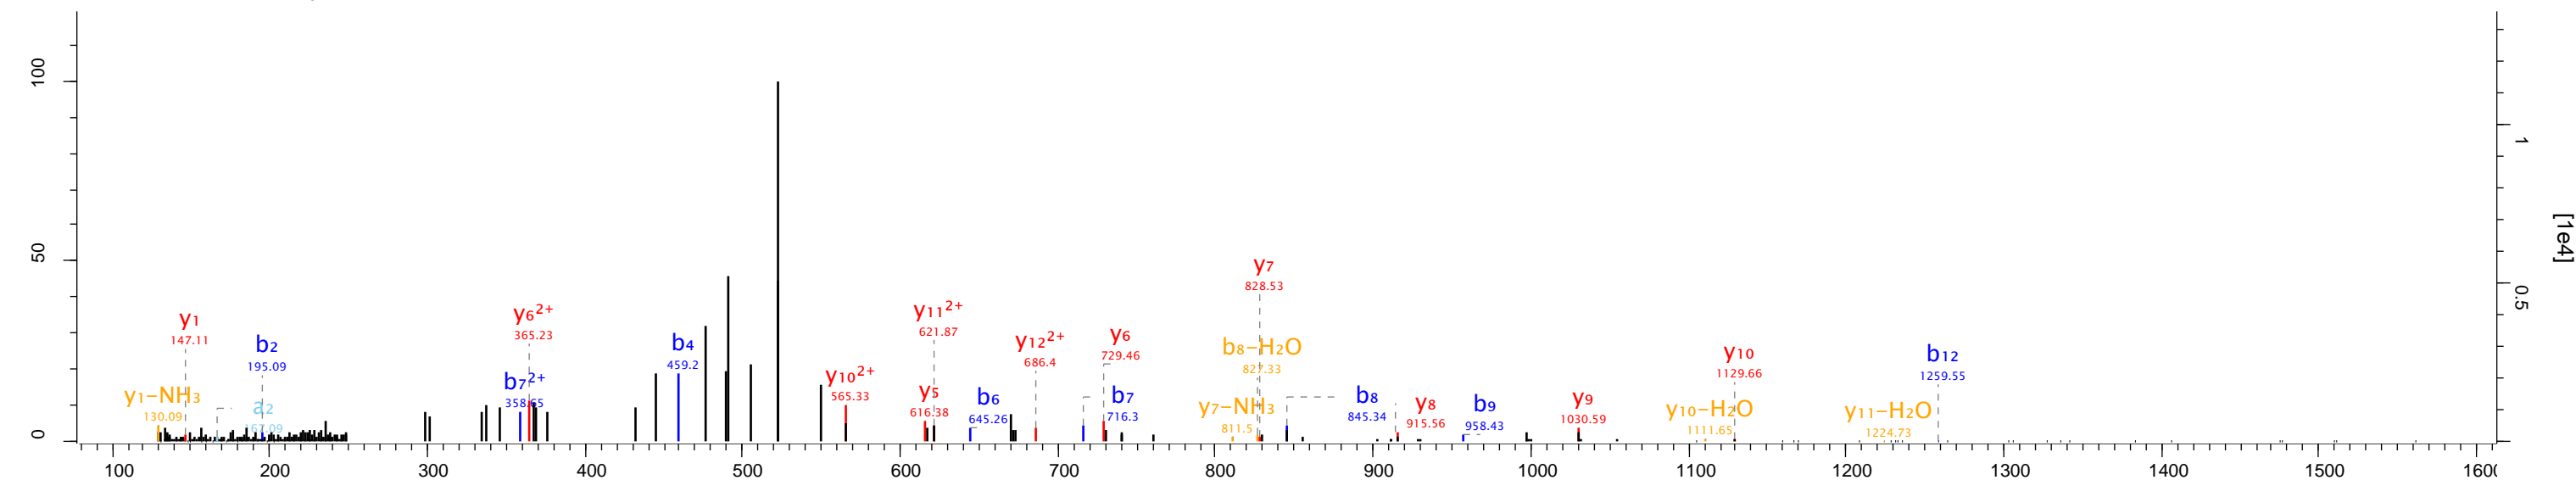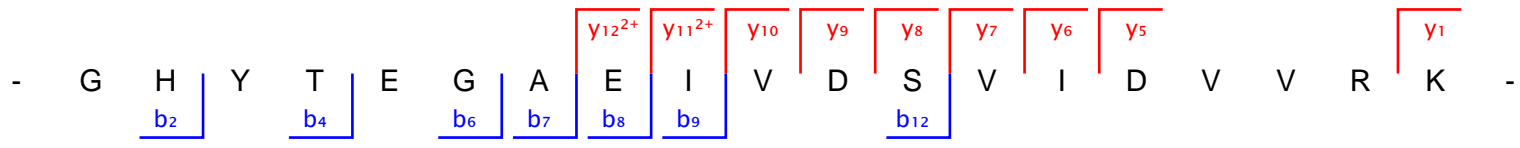

Spectral Annotation for Single-Peptide IDs in 16-cell Embryo using Q-OT-LIT

Raw file 2015-01-05\_CL02\_2Excl15sMaxInj70 Scan 9546 Method ITMS; HCD Score 65.24 m/z 469.9

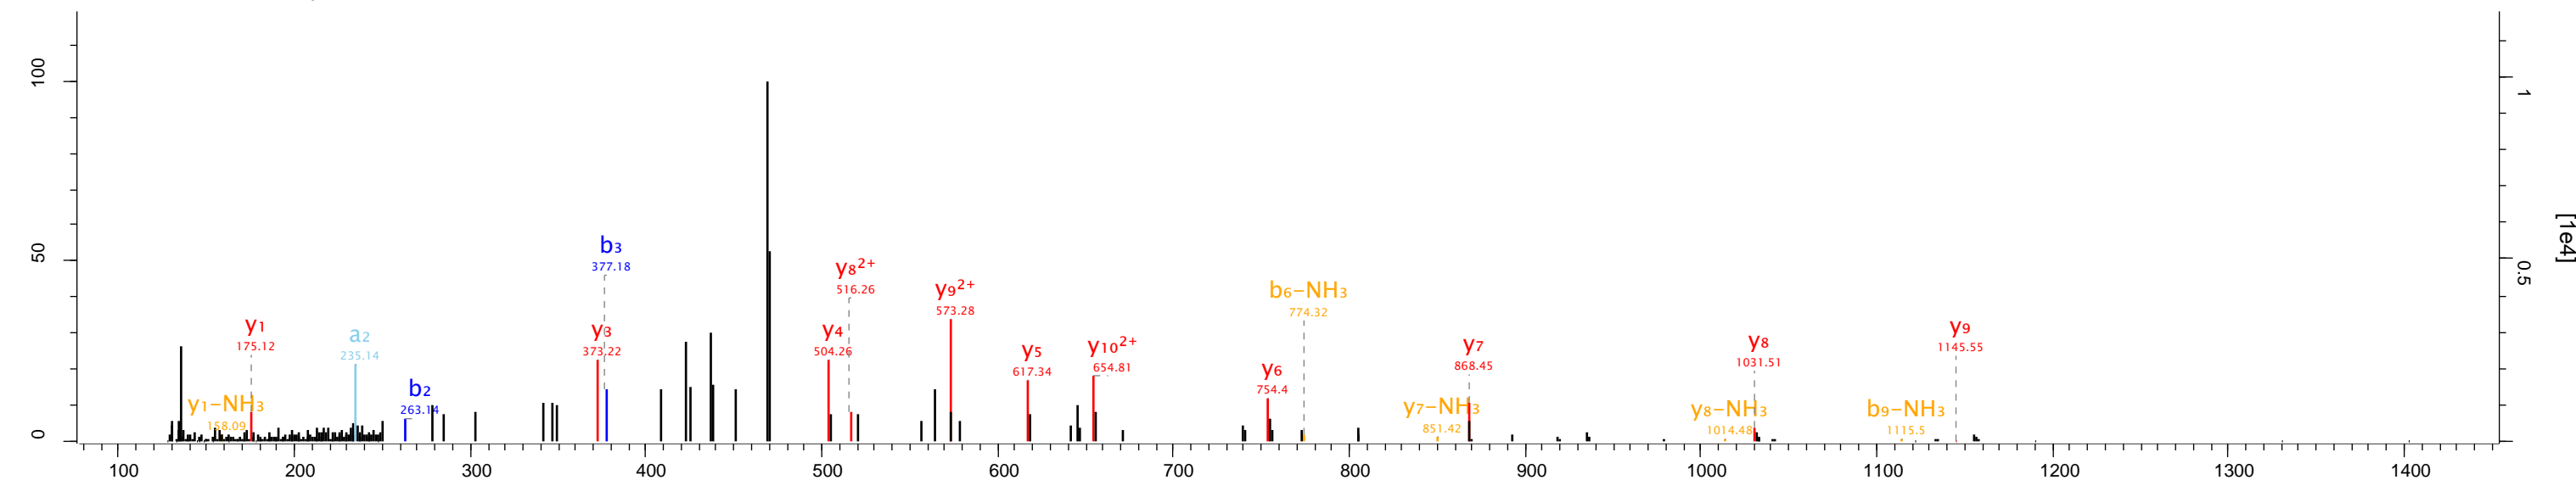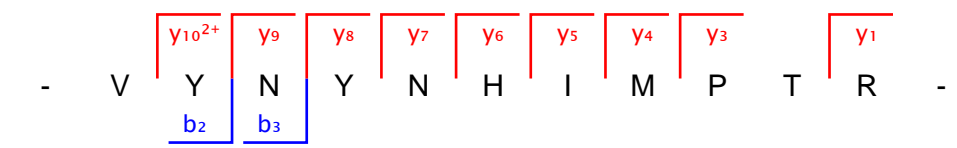

Raw file 2015-01-05\_CL02\_2Excl15sMaxInj70 Scan 9556 Method ITMS; HCD Score 44.58 m/z 522.77

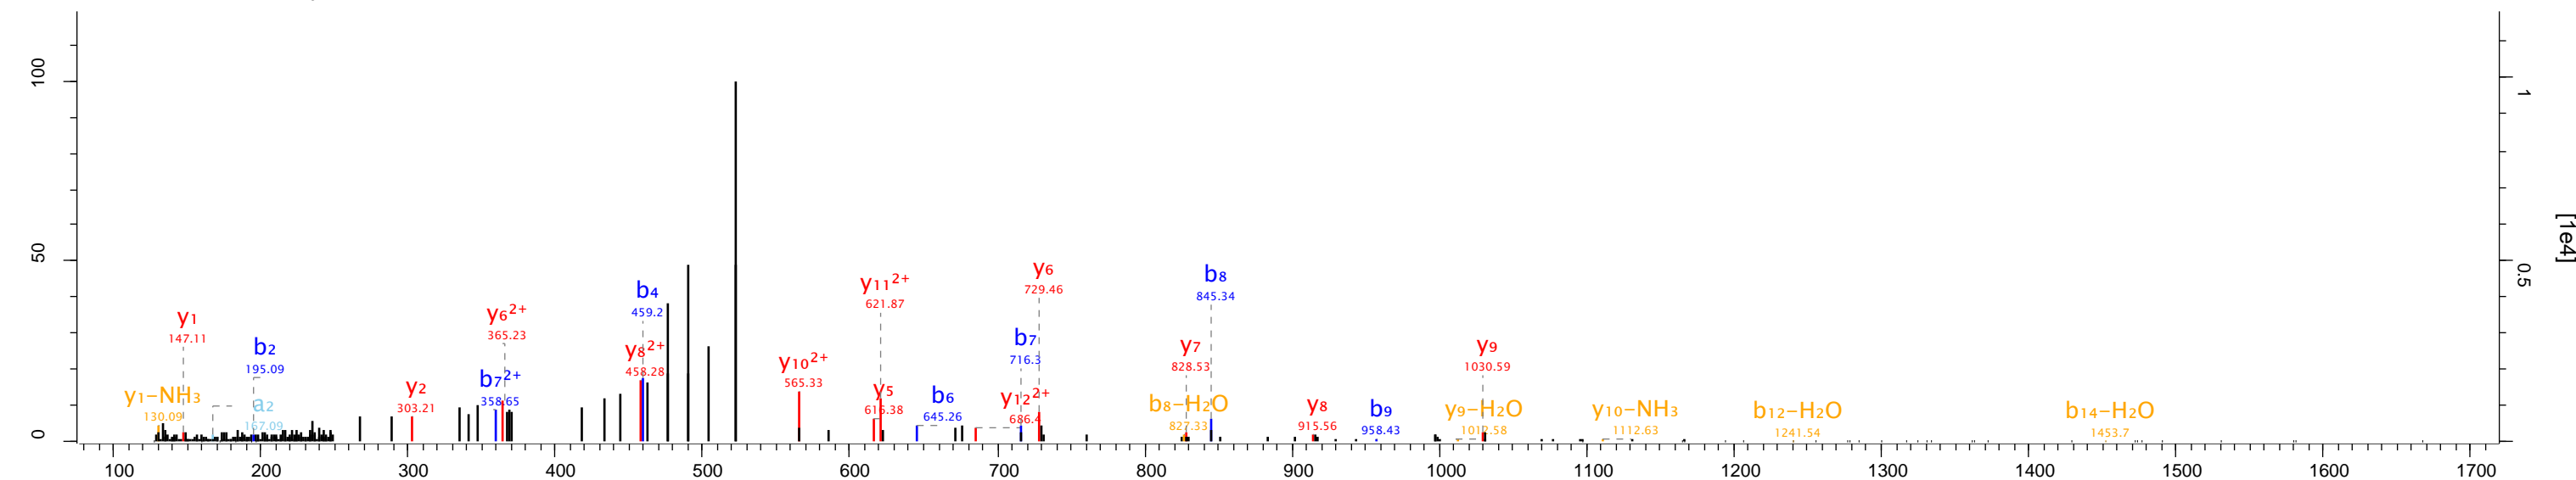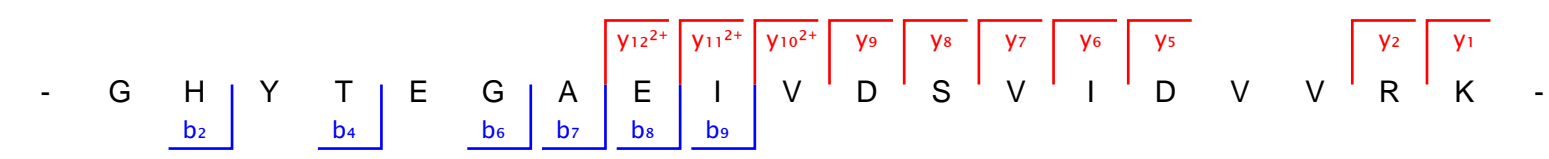

Raw file 2015-01-05\_CL02\_2Excl15sMaxInj70 Scan 9563 Method ITMS; HCD Score 68.54 m/z 469.9

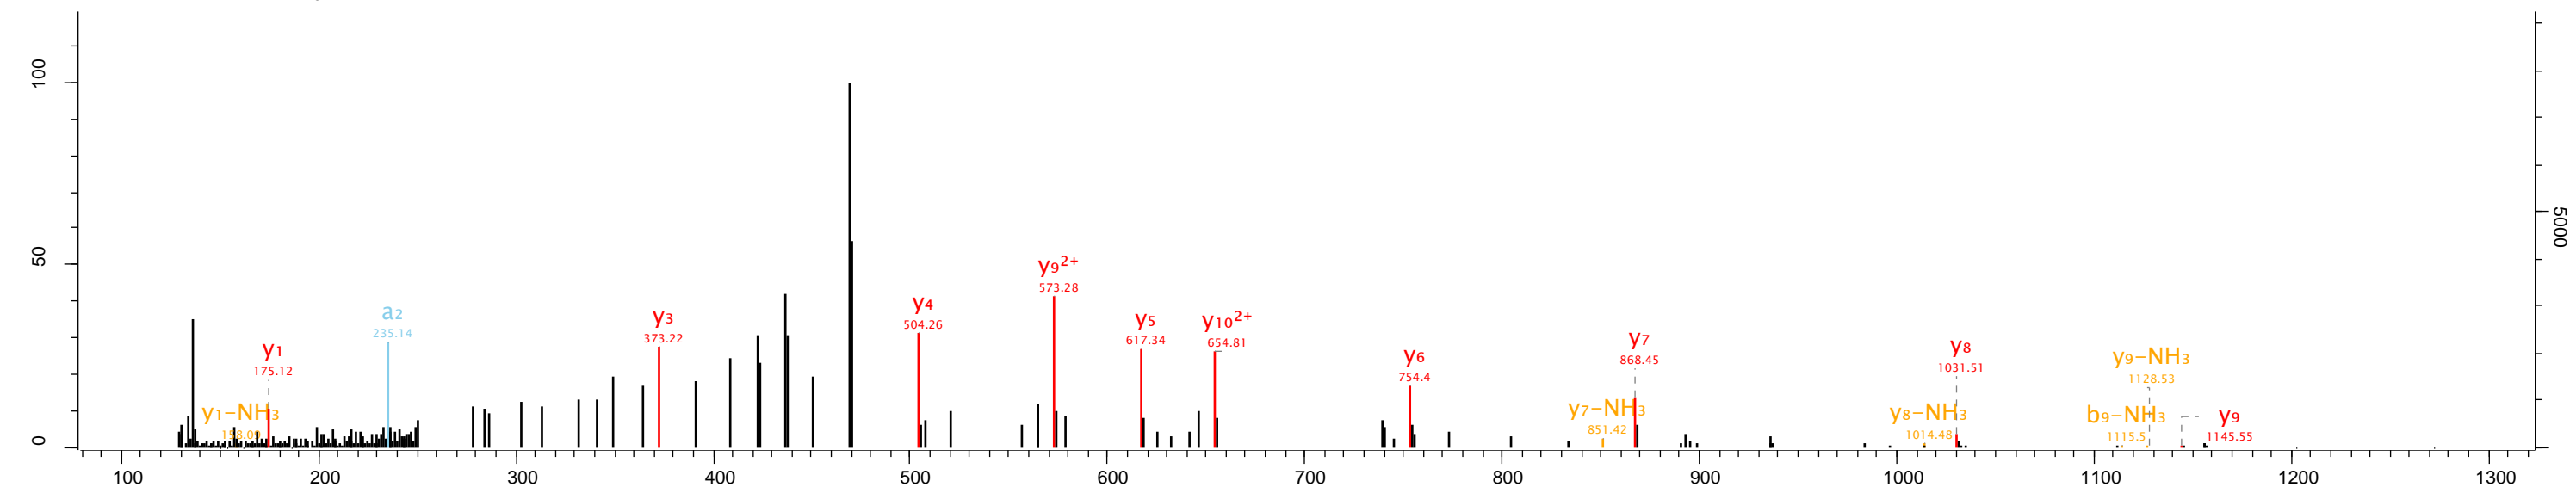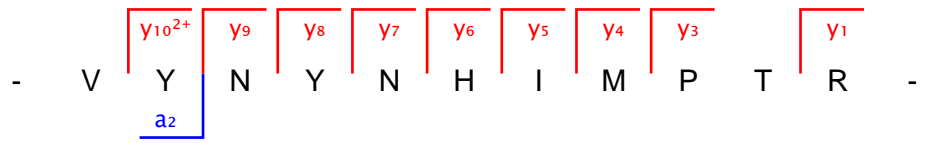

Raw file 2015-01-05\_CL02\_2Excl15sMaxInj70 Scan 9572 Method ITMS; HCD Score 98.1 m/z 433.59

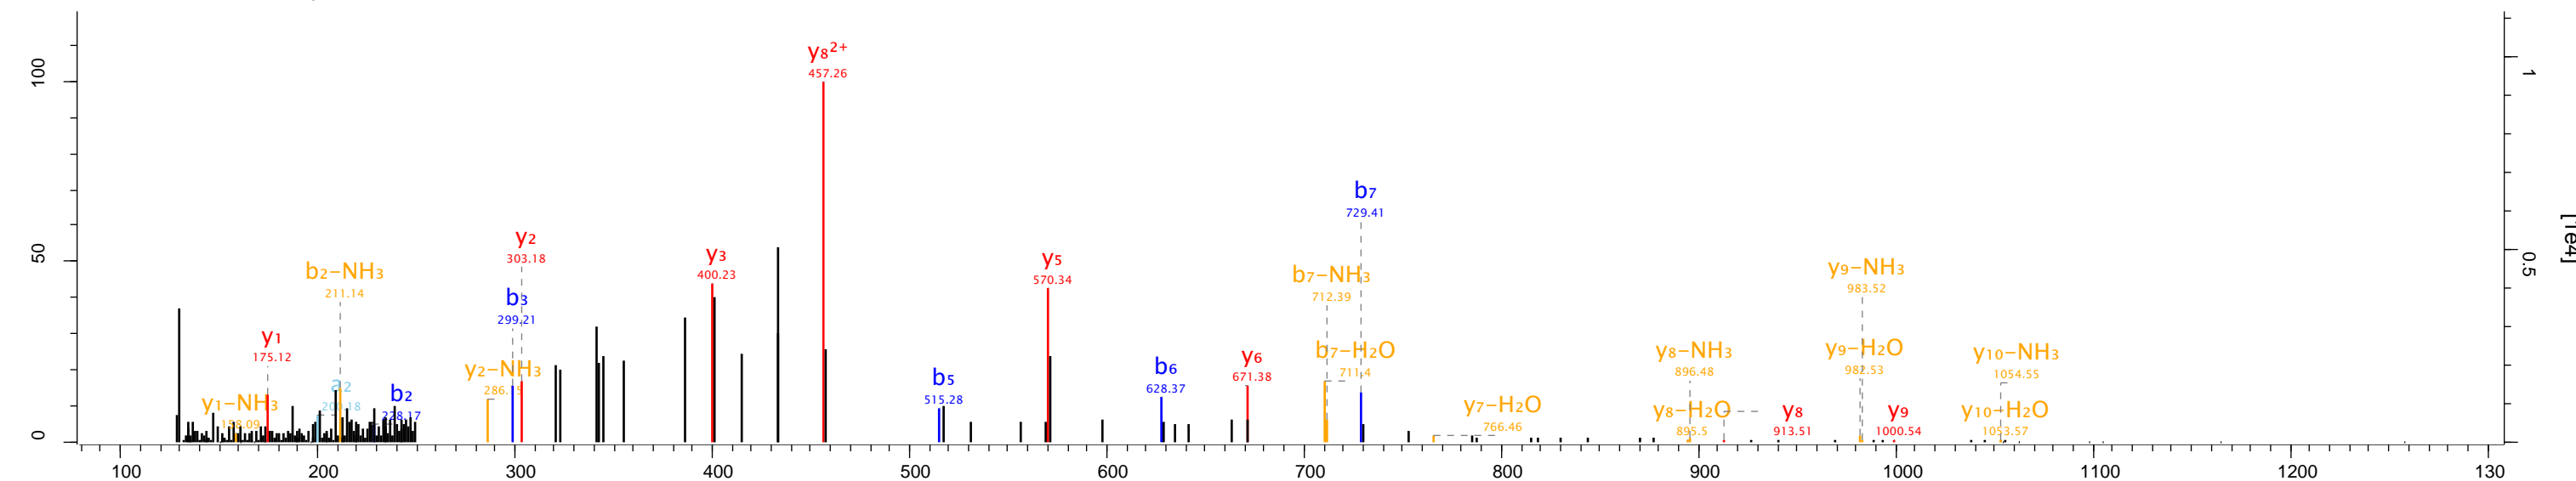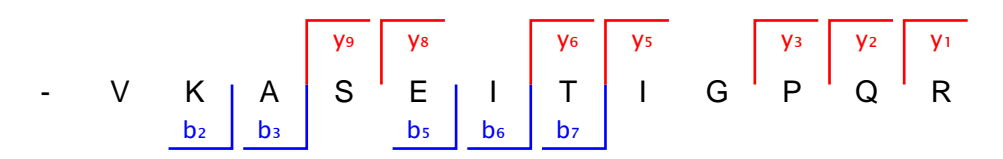

Raw file 2015-01-05\_CL02\_2Excl15sMaxInj70 Scan 9573 Method ITMS; HCD Score 68.54 m/z 469.9

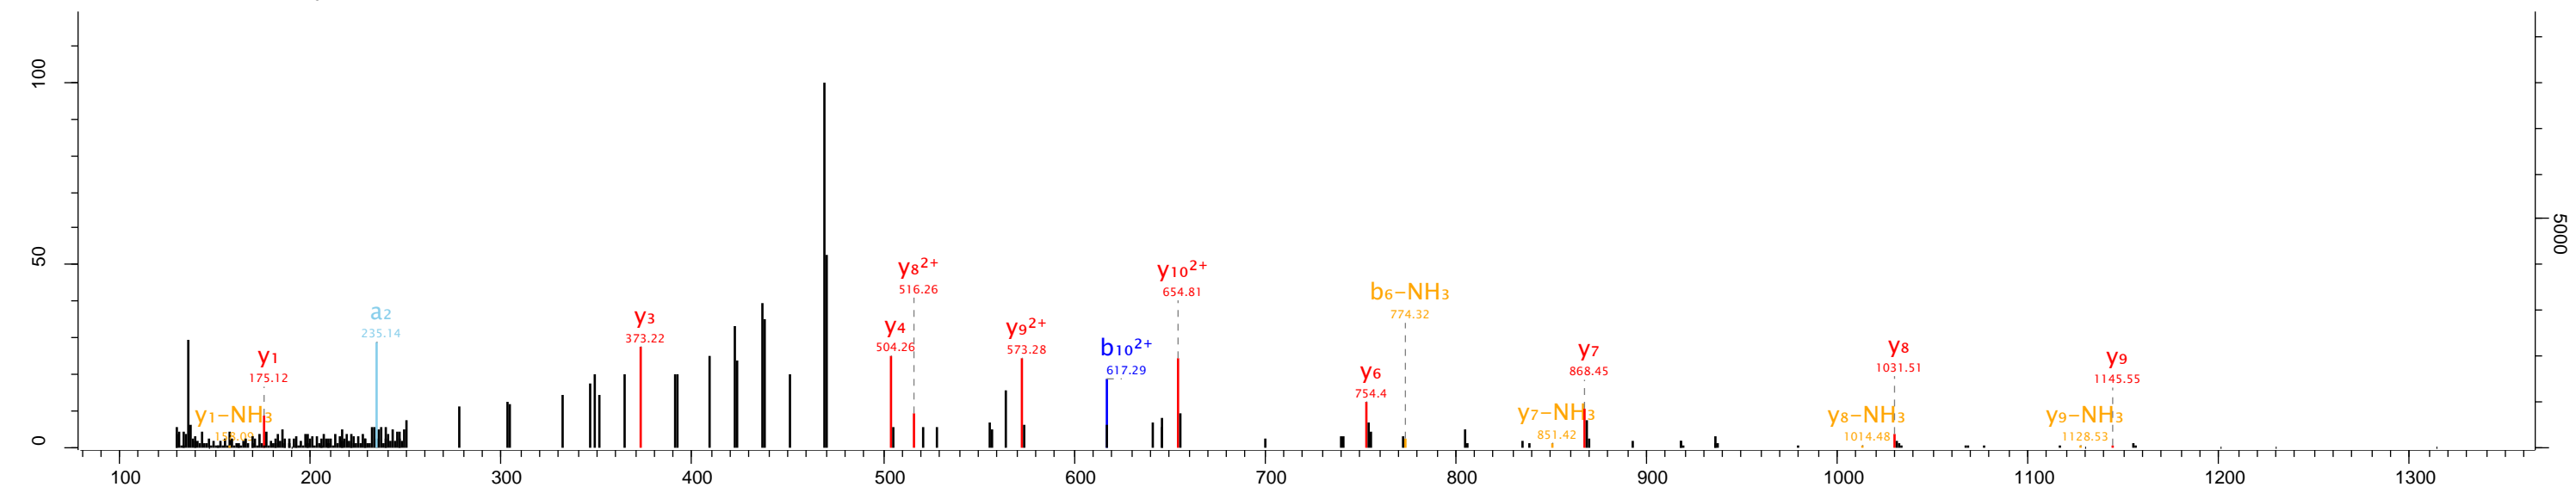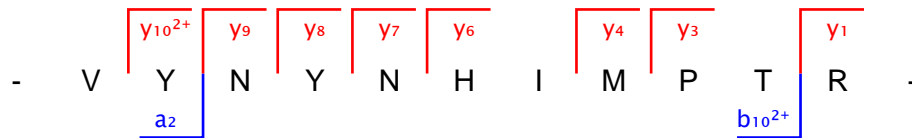

Spectral Annotation for Single-Peptide IDs in 16-cell Embryo using Q-OT-LIT



Raw file 2015-01-05\_CL02\_2Excl15sMaxInj70 Scan 9584 Method ITMS; HCD Score 87.09 m/z 704.02

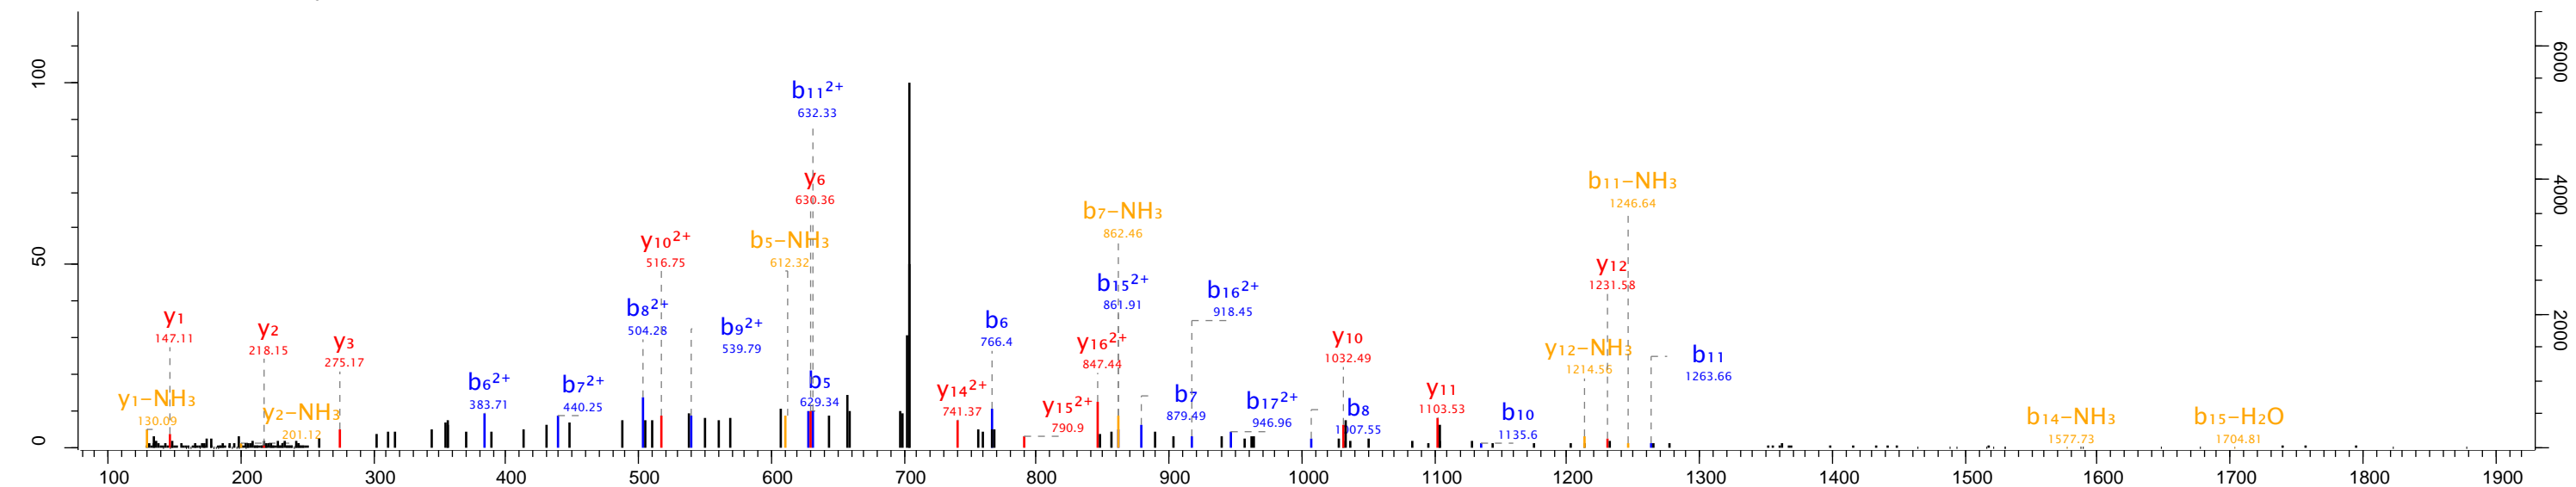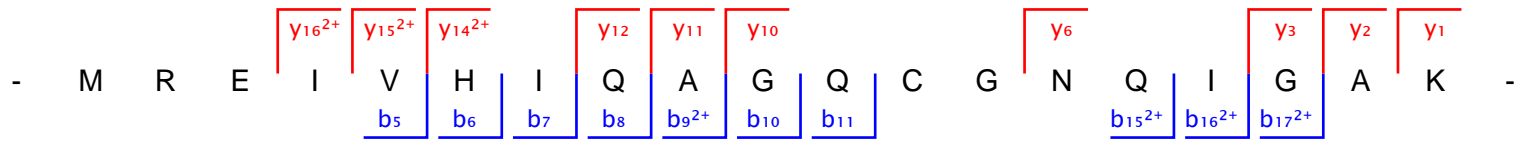

Spectral Annotation for Single-Peptide IDs in 16-cell Embryo using Q-OT-LIT

Raw file  
 2015-01-05\_CL02\_2Excl15sMaxInj70  
 Scan 9588 Method ITMS; HCD Score 77.18 m/z 433.58

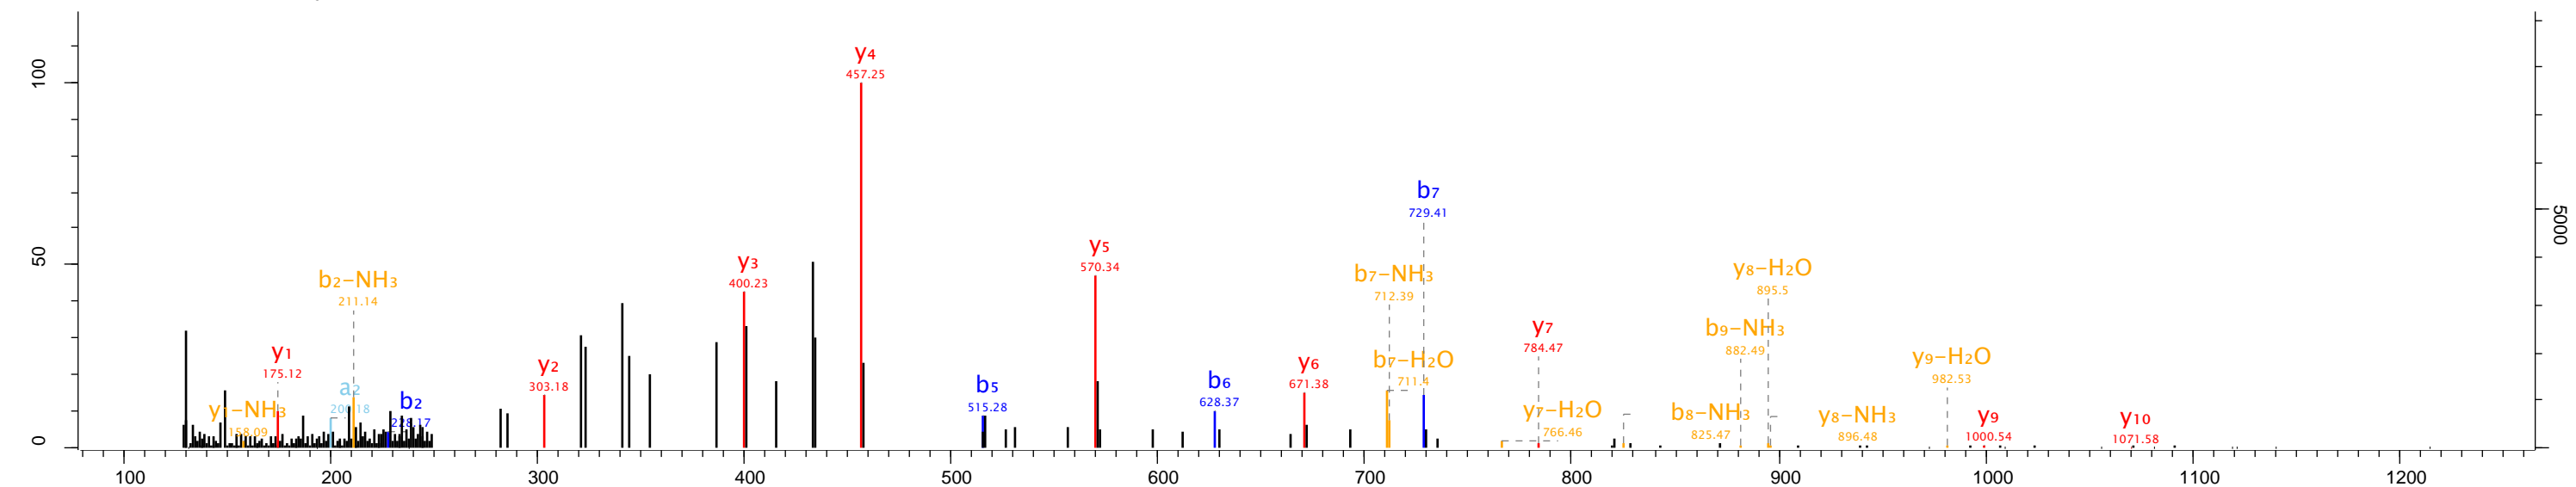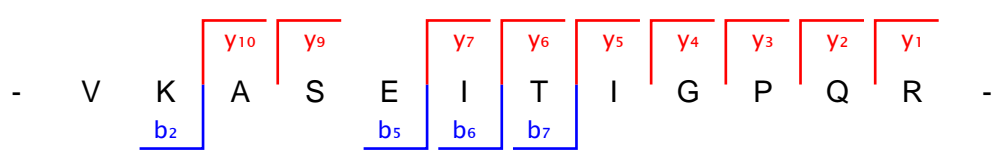

Spectral Annotation for Single-Peptide IDs in 16-cell Embryo using Q-OT-LIT

Raw file: 2015-01-05\_CL02\_2Excl15sMaxInj70  
 Scan: 9626 Method: ITMS; HCD Score: 110.92 m/z: 659.87

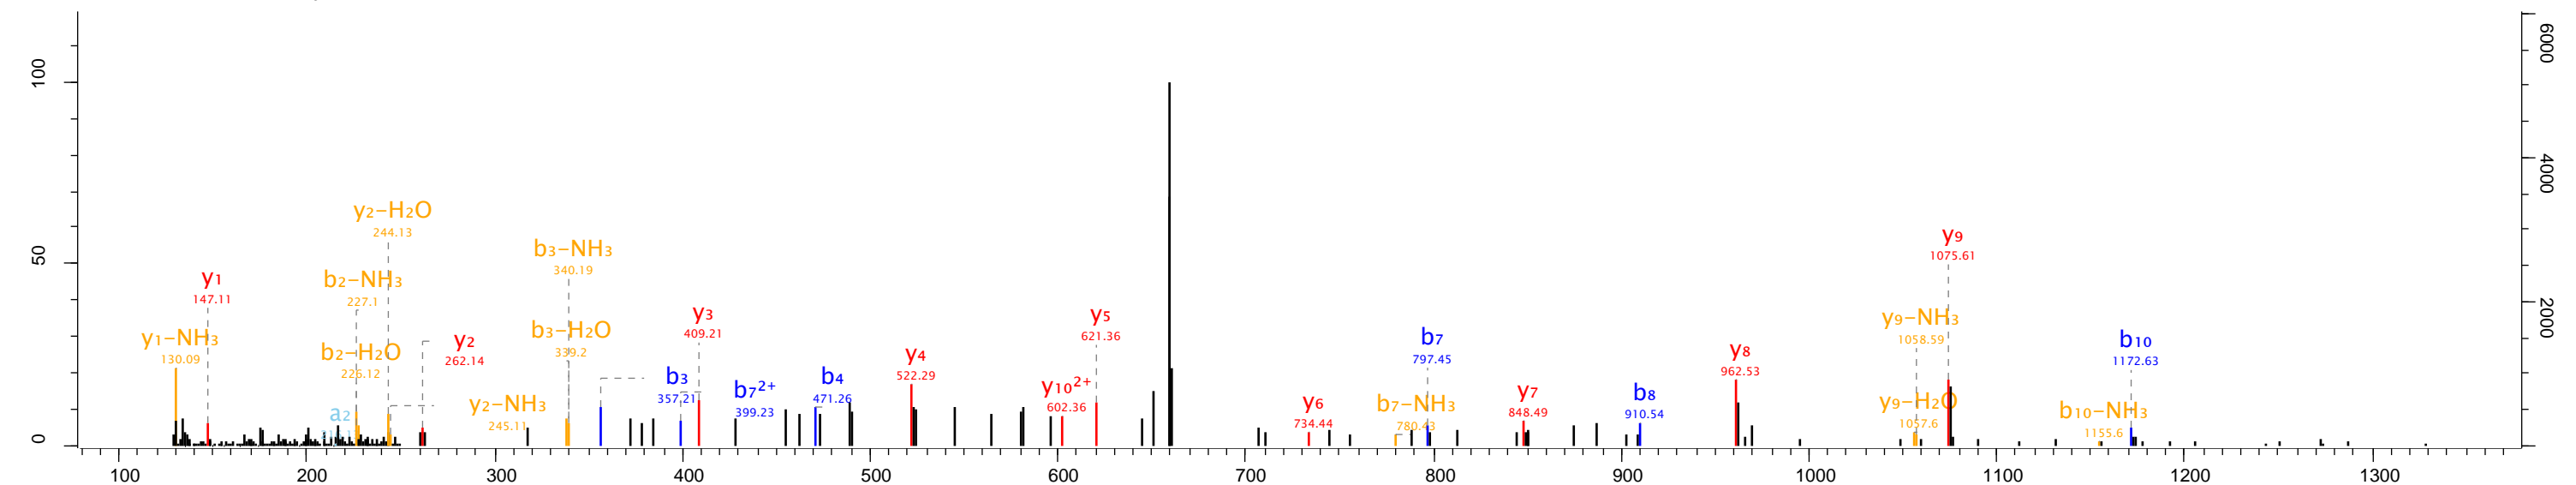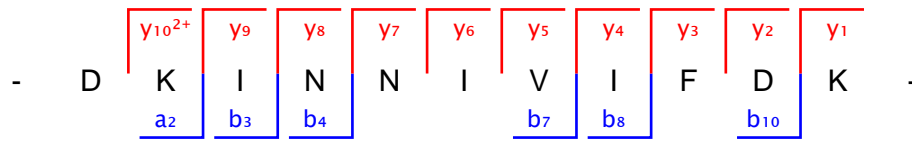

Raw file 2015-01-05\_CL02\_2Excl15sMaxInj70 Scan 9639 Method ITMS; HCD Score 113.54 m/z 659.87

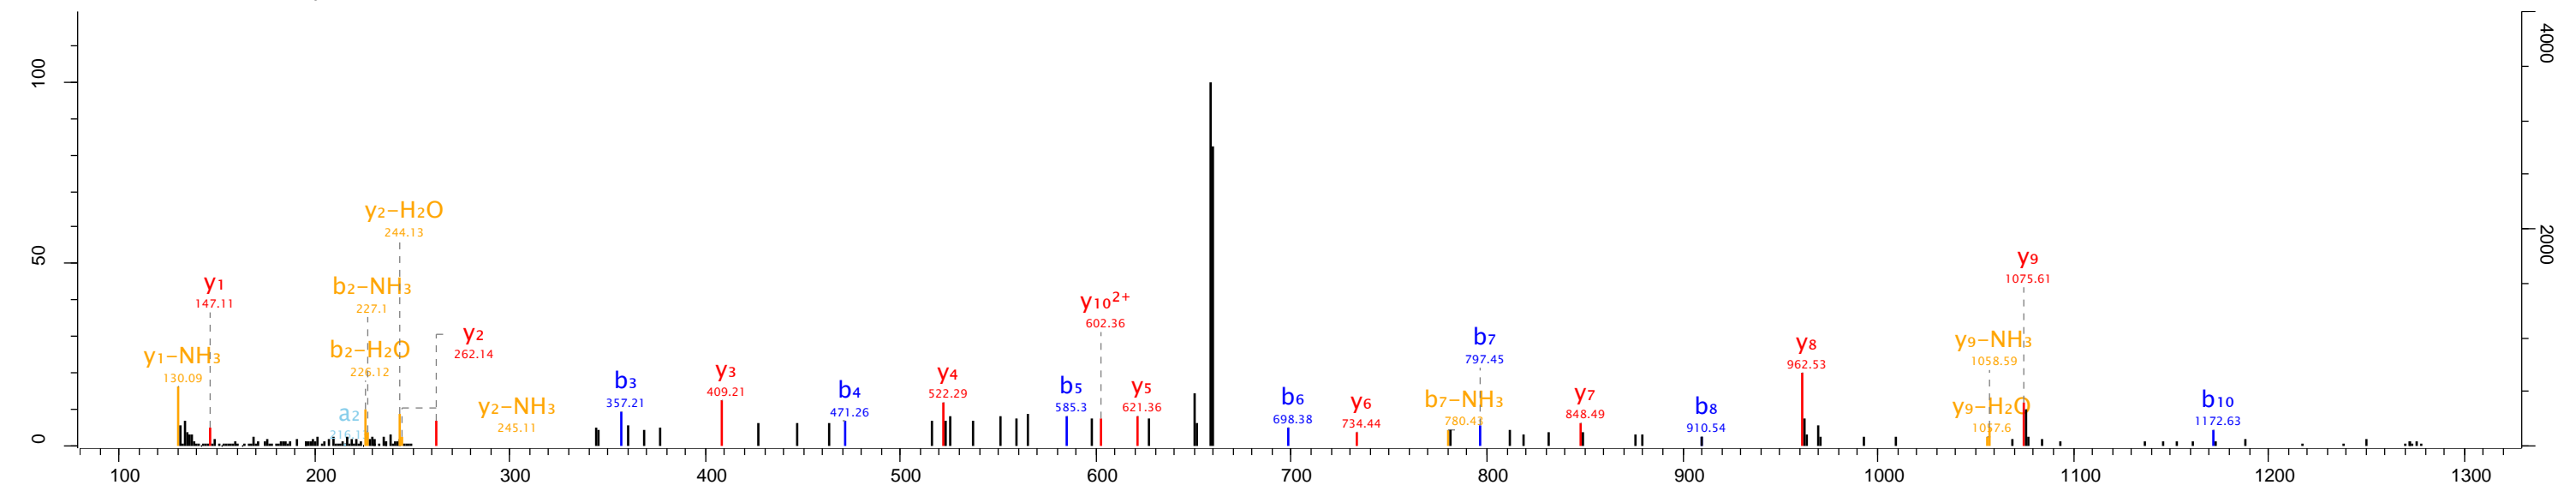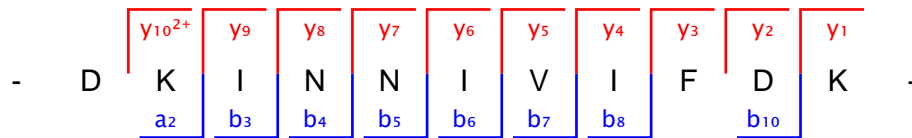

Spectral Annotation for Single-Peptide IDs in 16-cell Embryo using Q-OT-LIT

Raw file 2015-01-05\_CL02\_2Excl15sMaxInj70 Scan 9660 Method ITMS; HCD Score 54.34 m/z 422.27

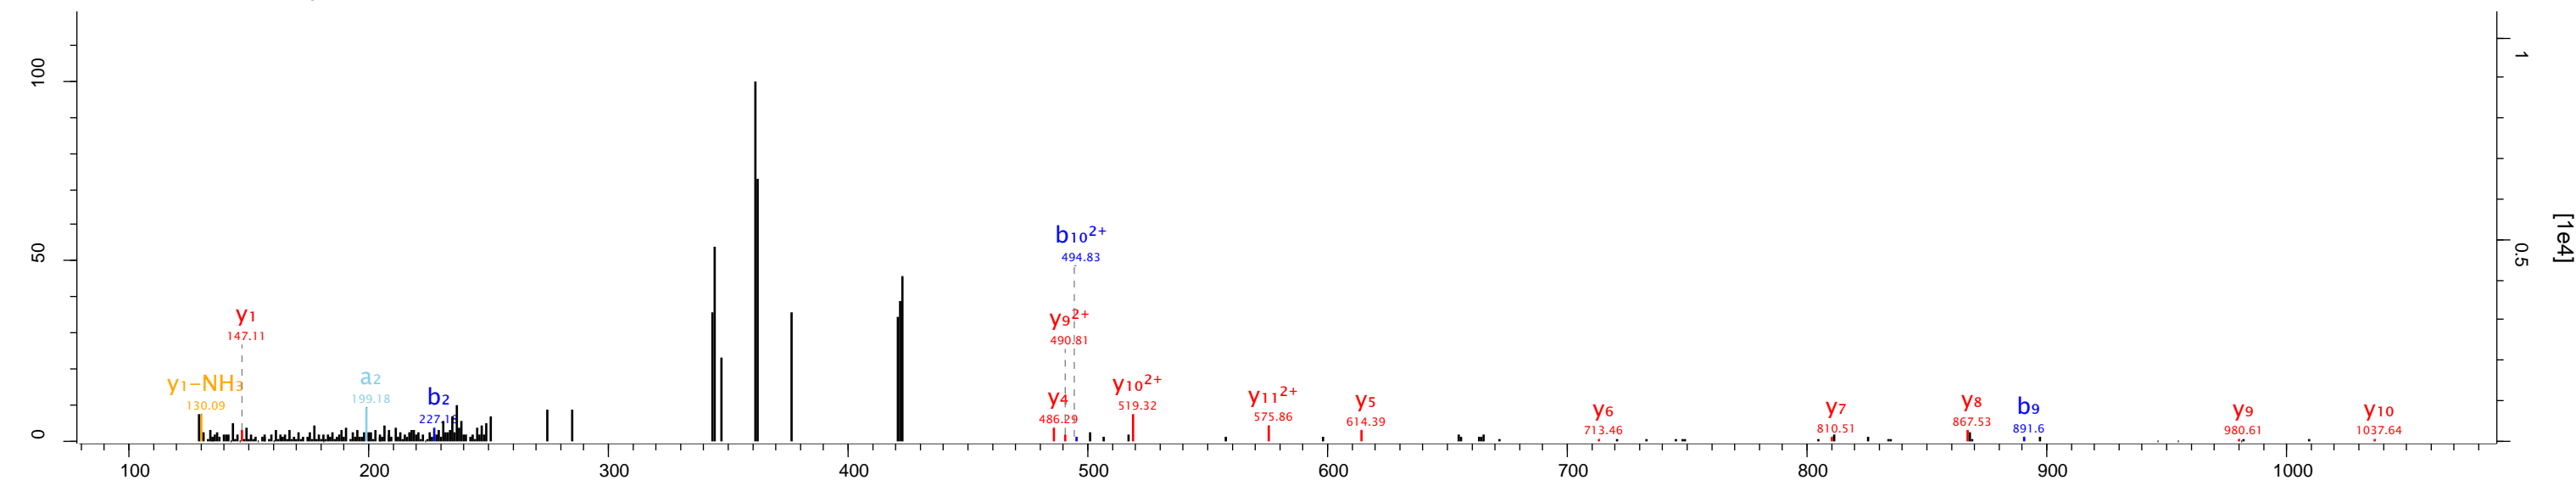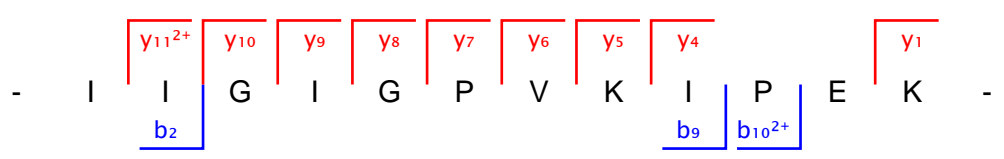

Raw file: 2015-01-05\_CL02\_2Excl15sMaxInj70  
 Scan: 9664 Method: ITMS; HCD Score: 105.65 m/z: 660.37

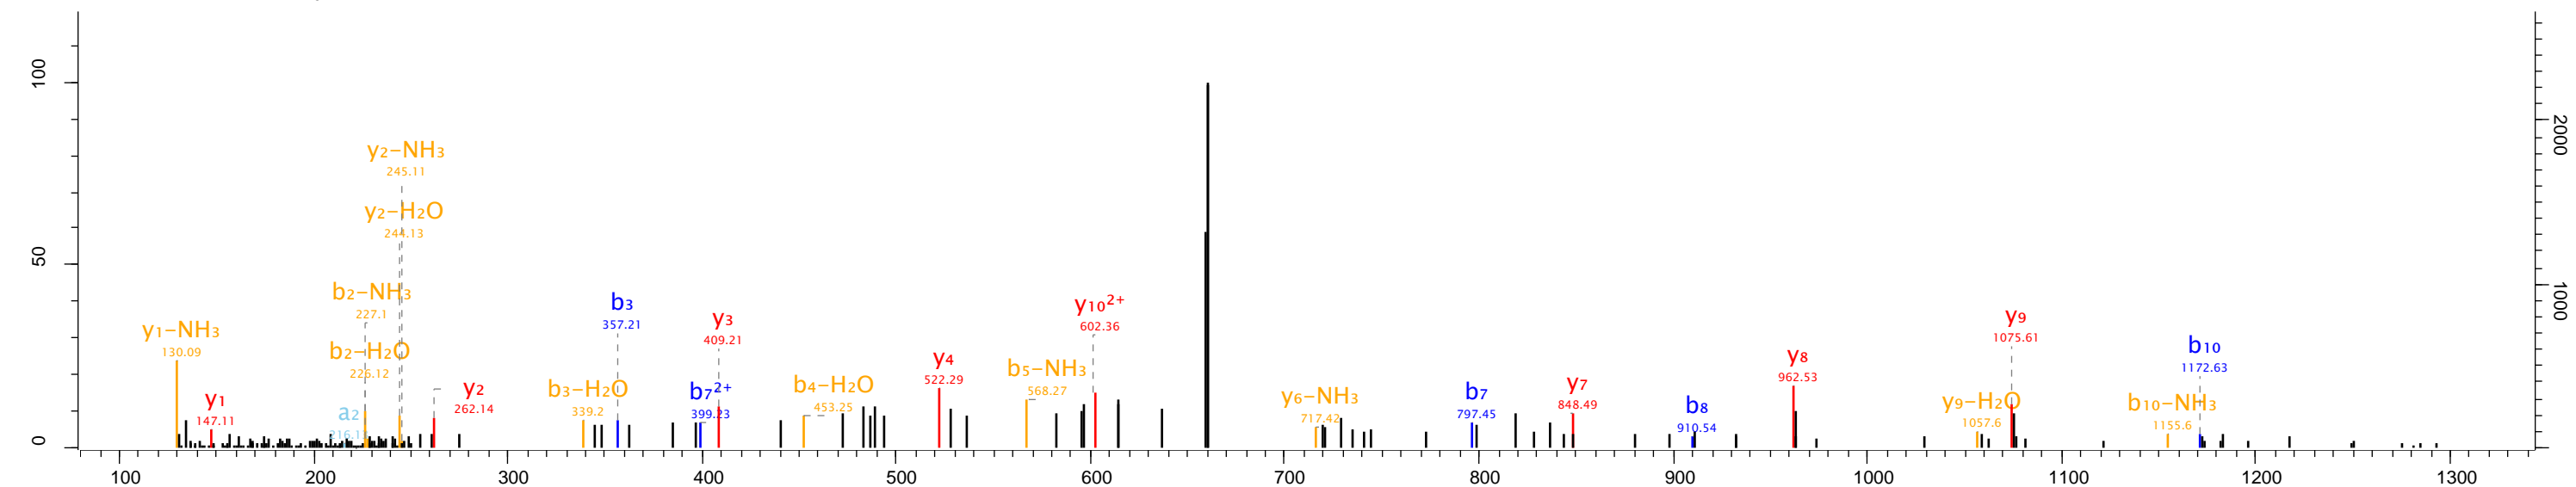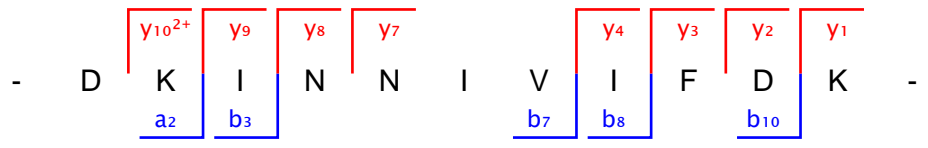

Spectral Annotation for Single-Peptide IDs in 16-cell Embryo using Q-OT-LIT

Raw file 2015-01-05\_CL02\_2Excl15sMaxInj70 Scan 9802 Method ITMS; HCD Score 33.08 m/z 696.37

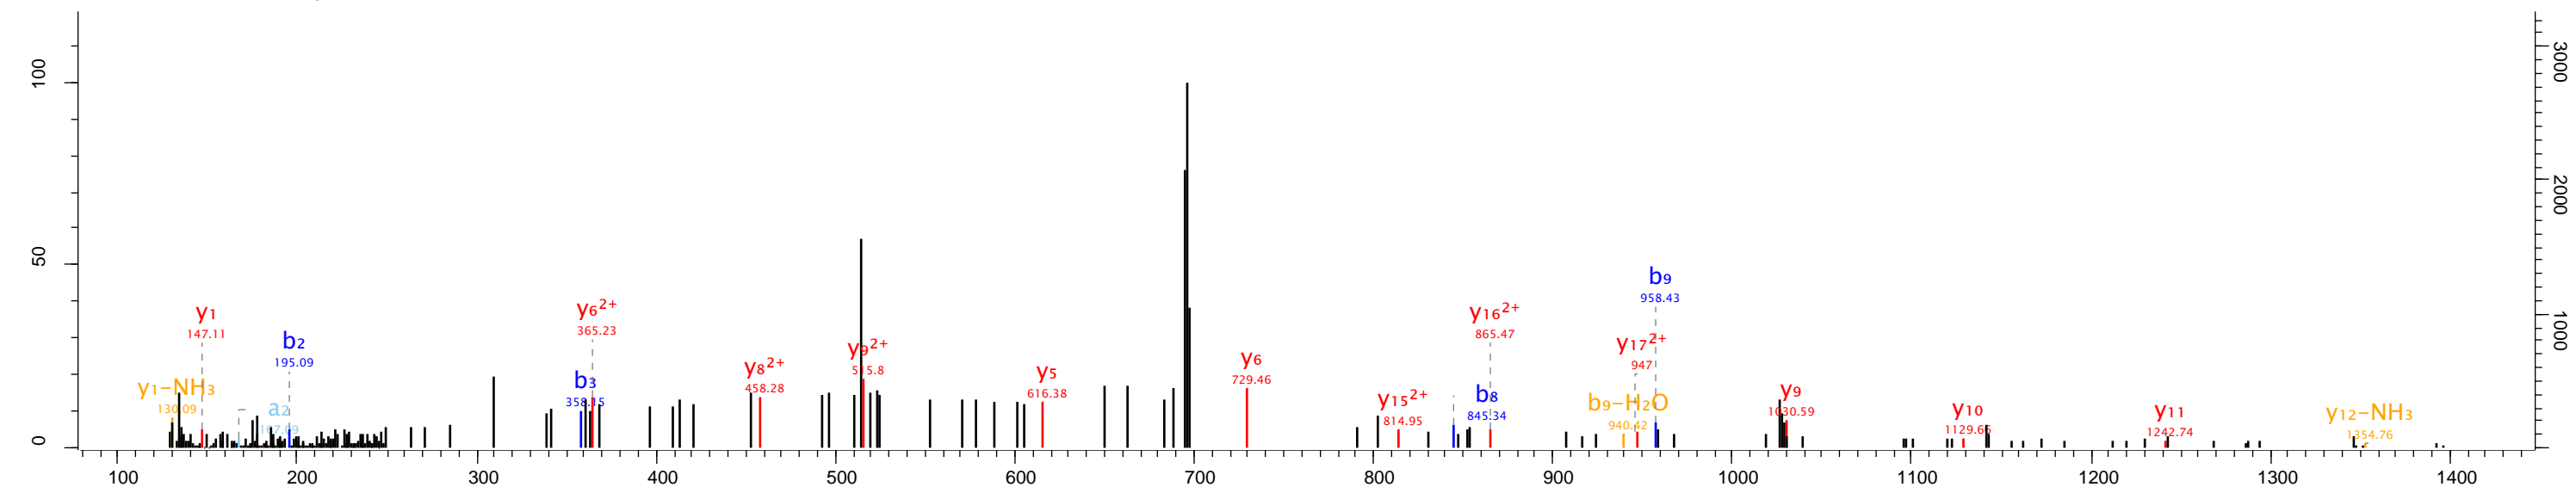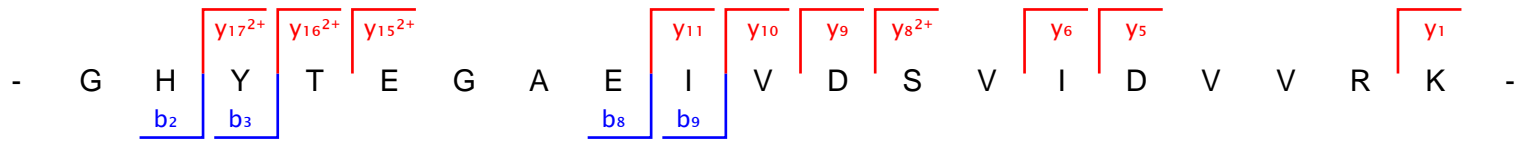

Raw file 2015-01-05\_CL02\_2Excl15sMaxInj70 Scan 9884 Method ITMS; HCD Score 48.11 m/z 428.57

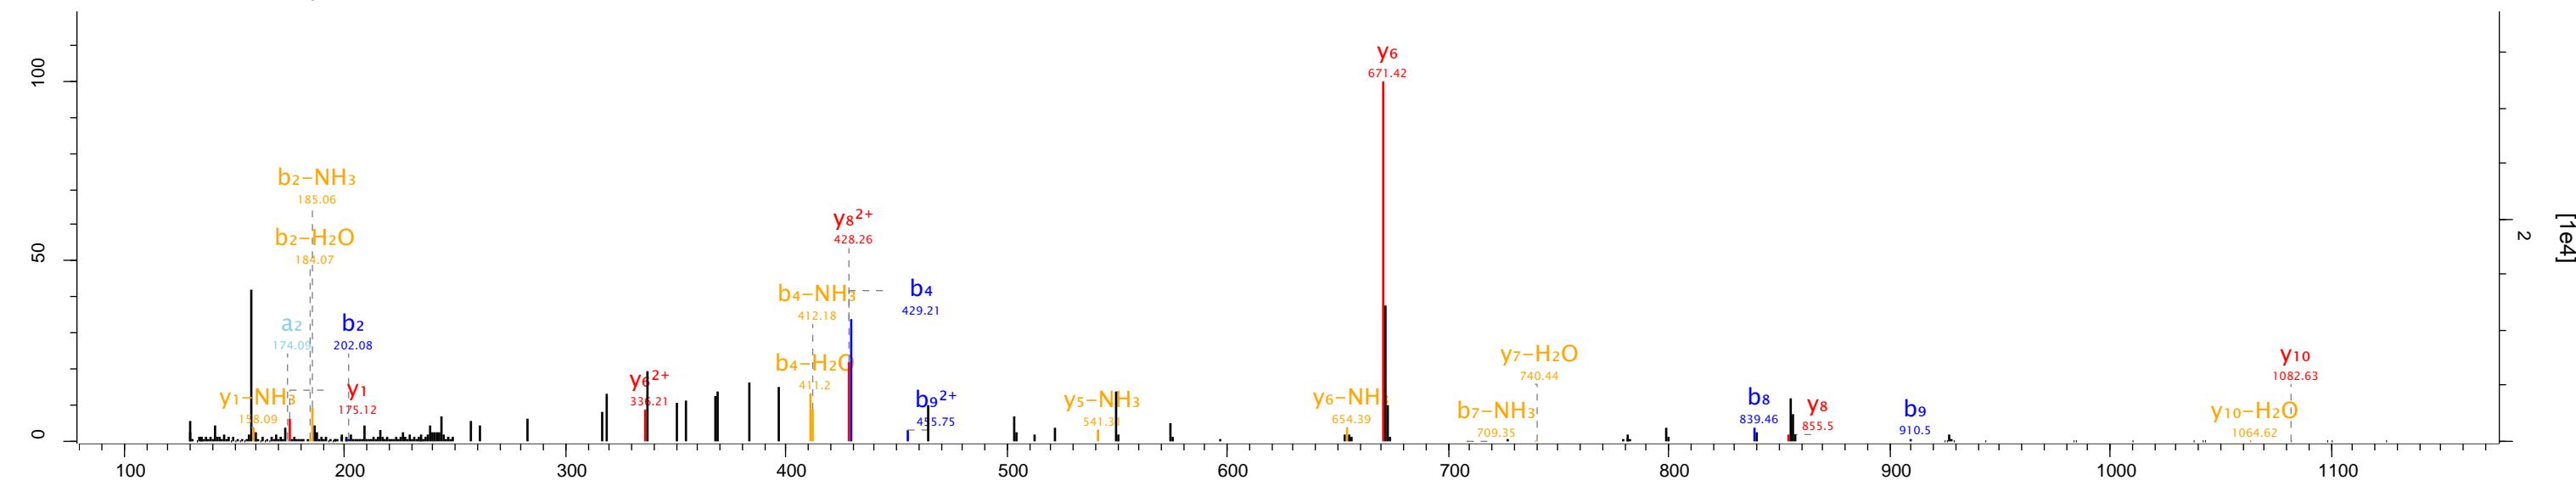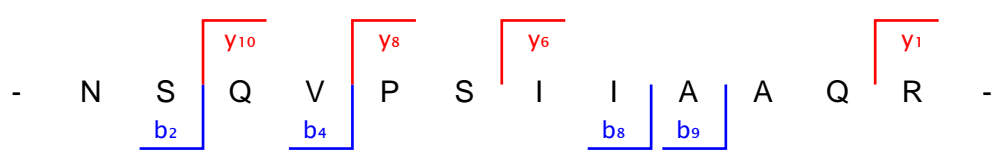

Spectral Annotation for Single-Peptide IDs in 16-cell Embryo using Q-OT-LIT



Raw file 2015-01-05\_CL02\_2Excl15sMaxInj70 Scan 9901 Method ITMS; HCD Score 51.29 m/z 428.57

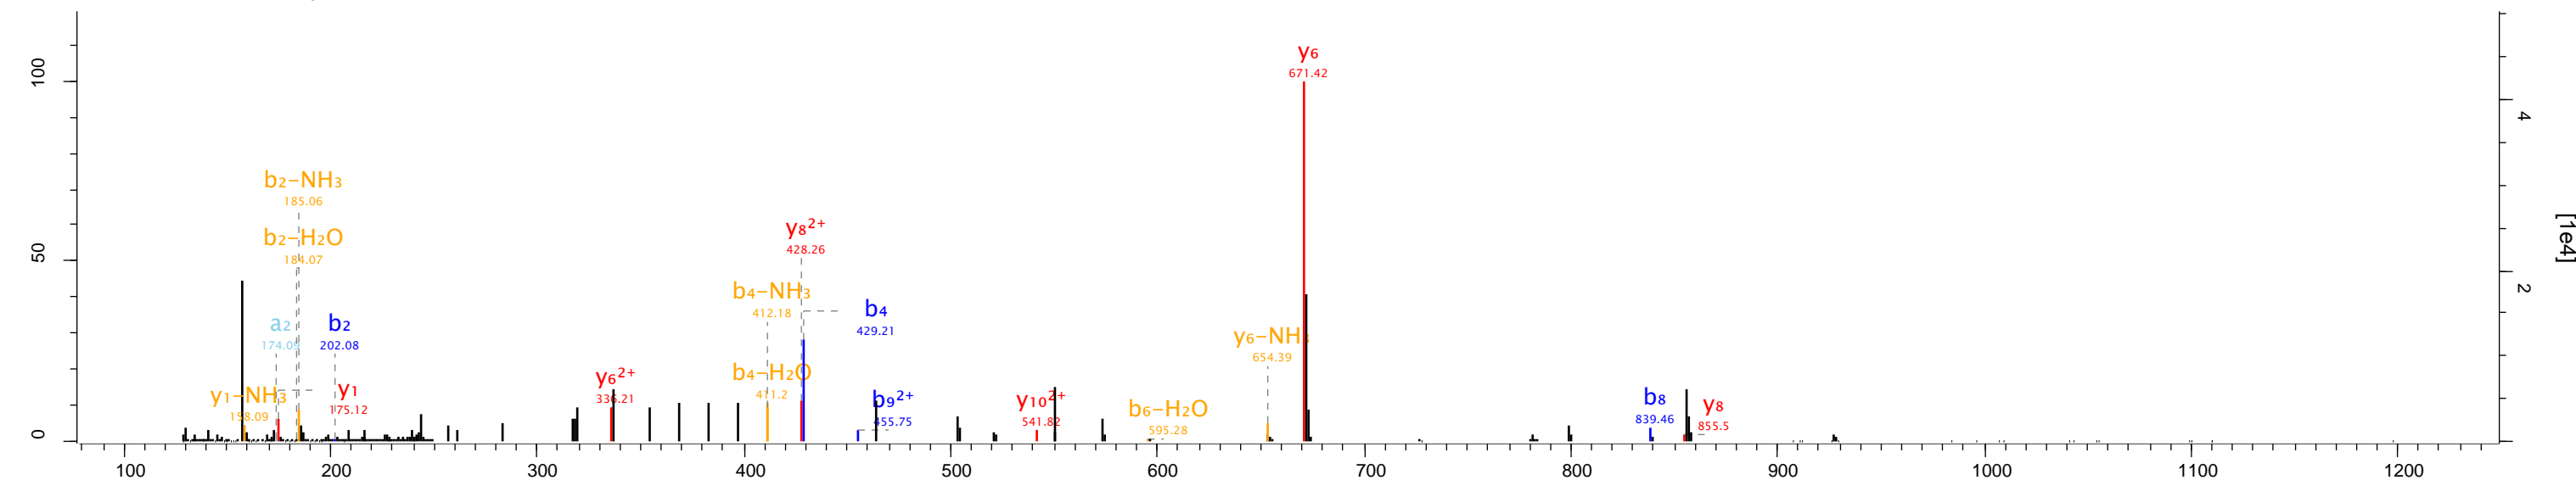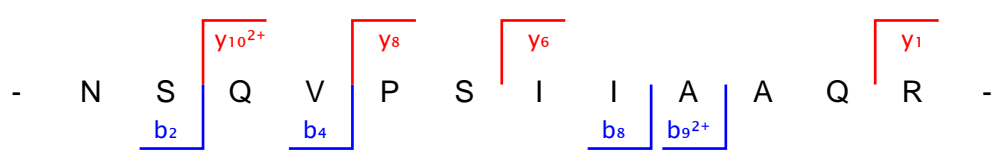

Raw file 2015-01-05\_CL02\_2Excl15sMaxInj70 Scan 9914 Method ITMS; HCD Score 55.26 m/z 428.57

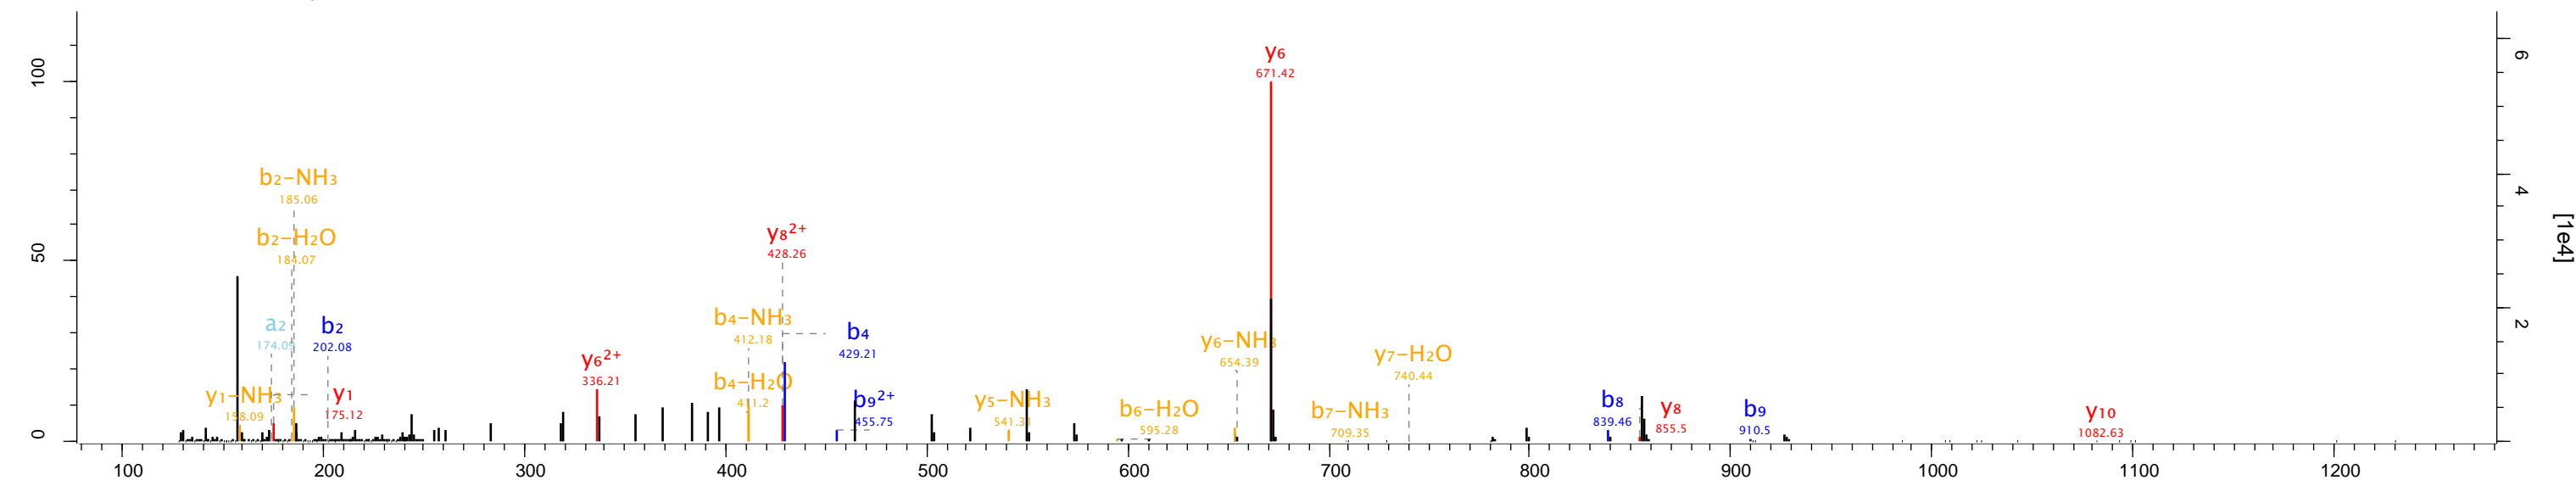

Spectral Annotation for Single-Peptide IDs in 16-cell Embryo using Q-OT-LIT

Raw file Scan Method Score m/z  
 2015-01-05\_CL02\_2Excl15sMaxInj70 9928 ITMS; HCD 50.48 428.57

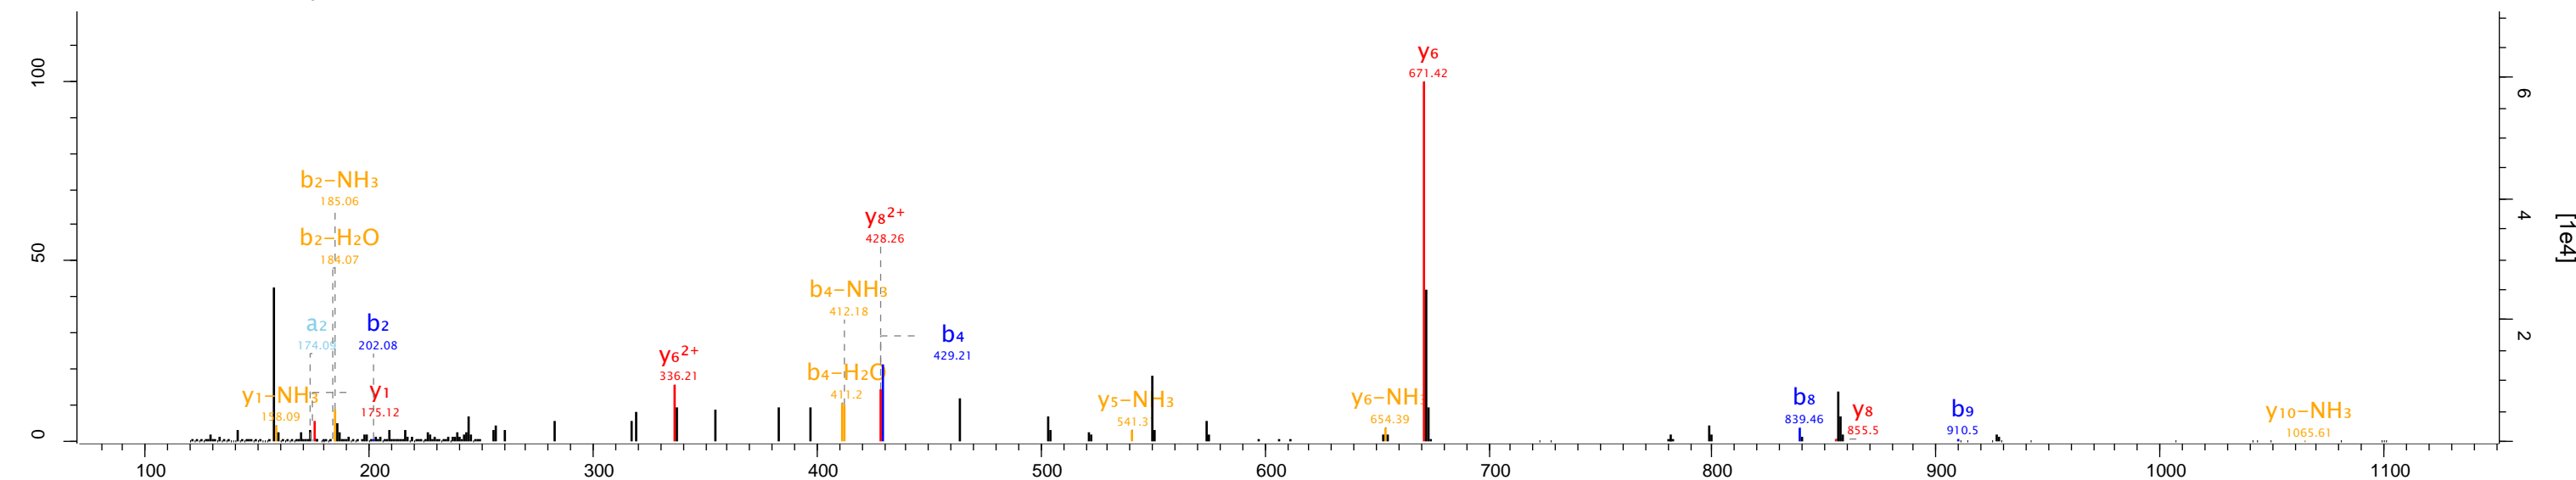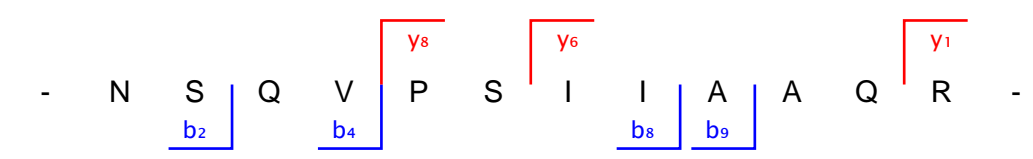

Raw file 2015-01-05\_CL02\_2Excl15sMaxInj70 Scan 10029 Method ITMS; HCD Score 93.23 m/z 547.3

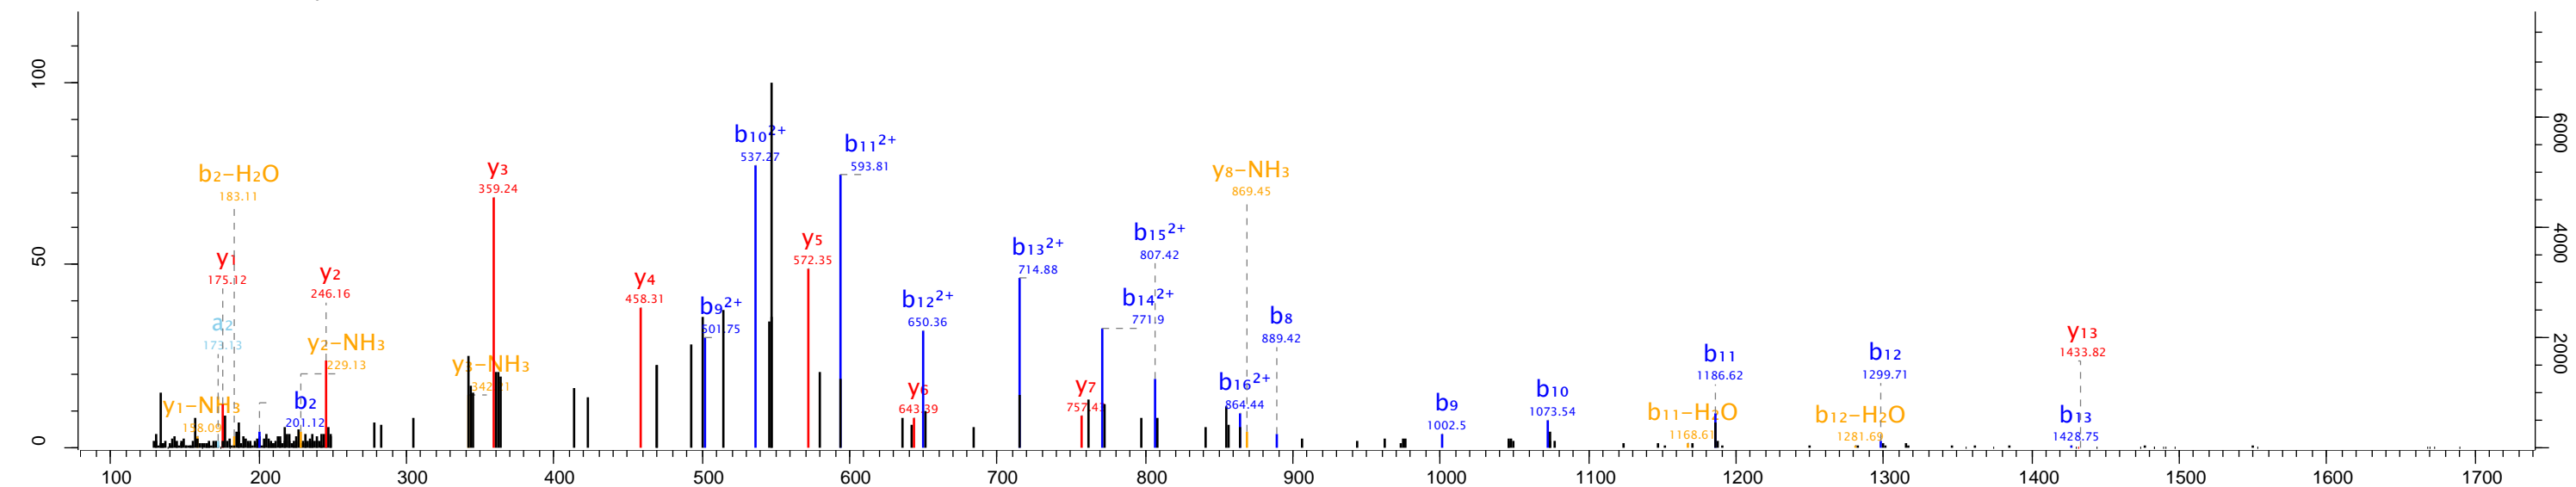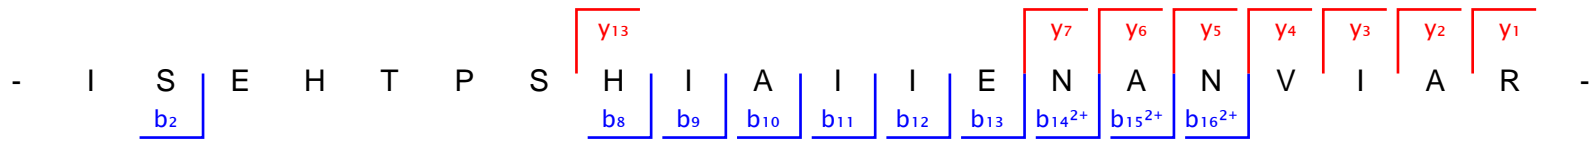

Spectral Annotation for Single-Peptide IDs in 16-cell Embryo using Q-OT-LIT

Raw file: 2015-01-05\_CL02\_2Excl15sMaxInj70  
 Scan: 10033 Method: ITMS; HCD Score: 76.07 m/z: 729.4

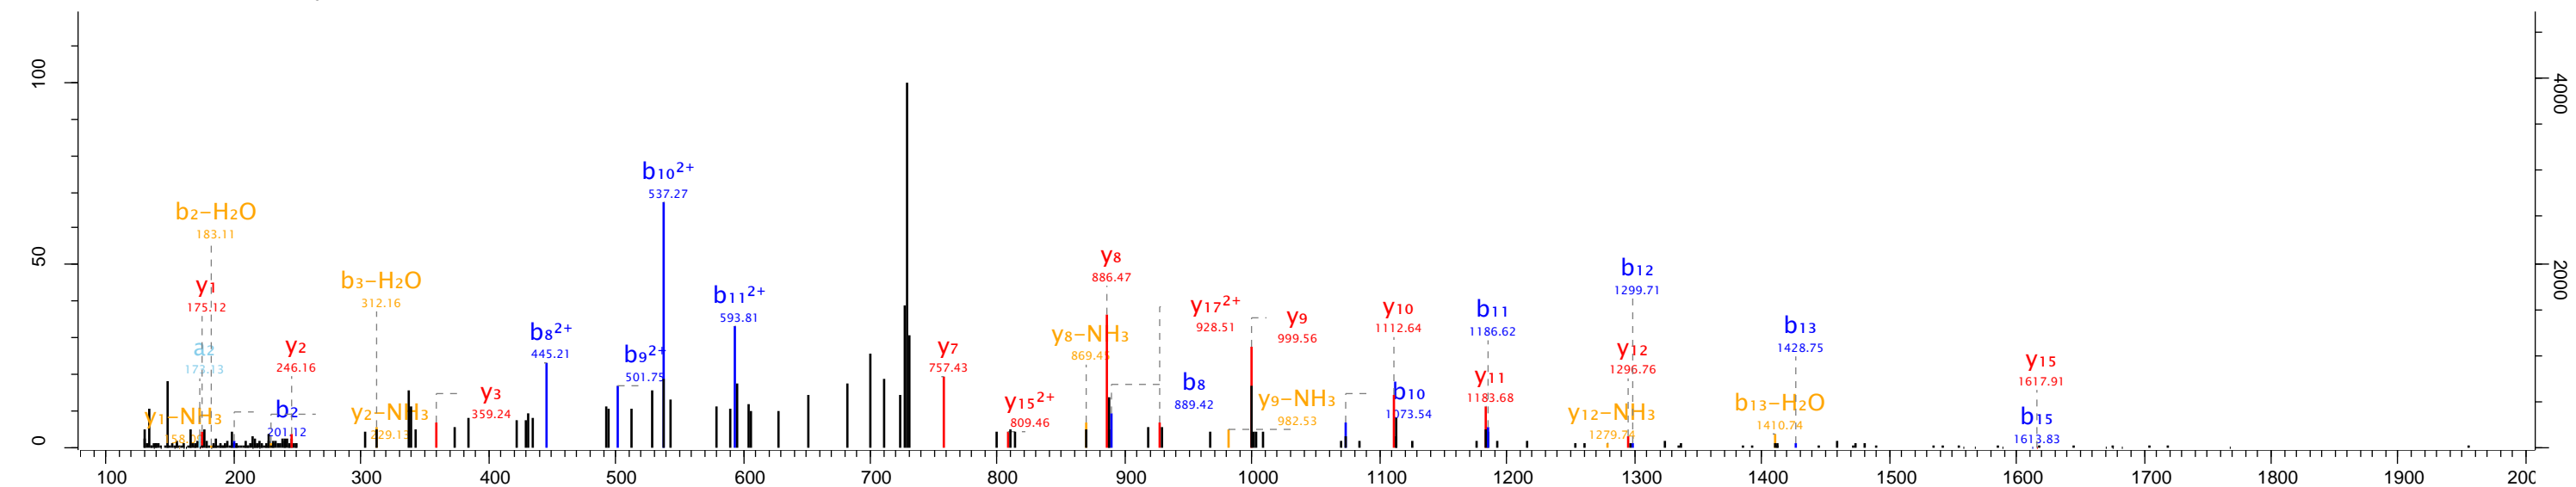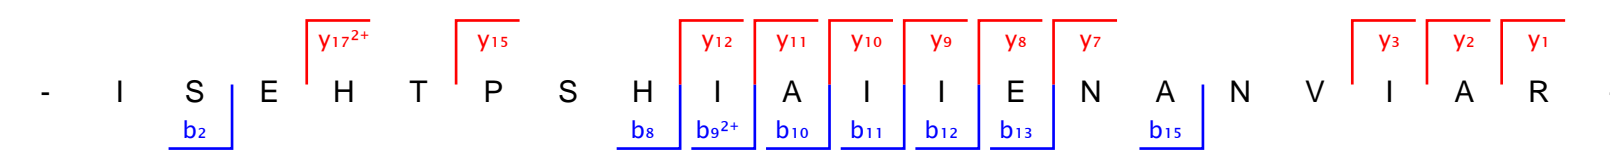

Spectral Annotation for Single-Peptide IDs in 16-cell Embryo using Q-OT-LIT

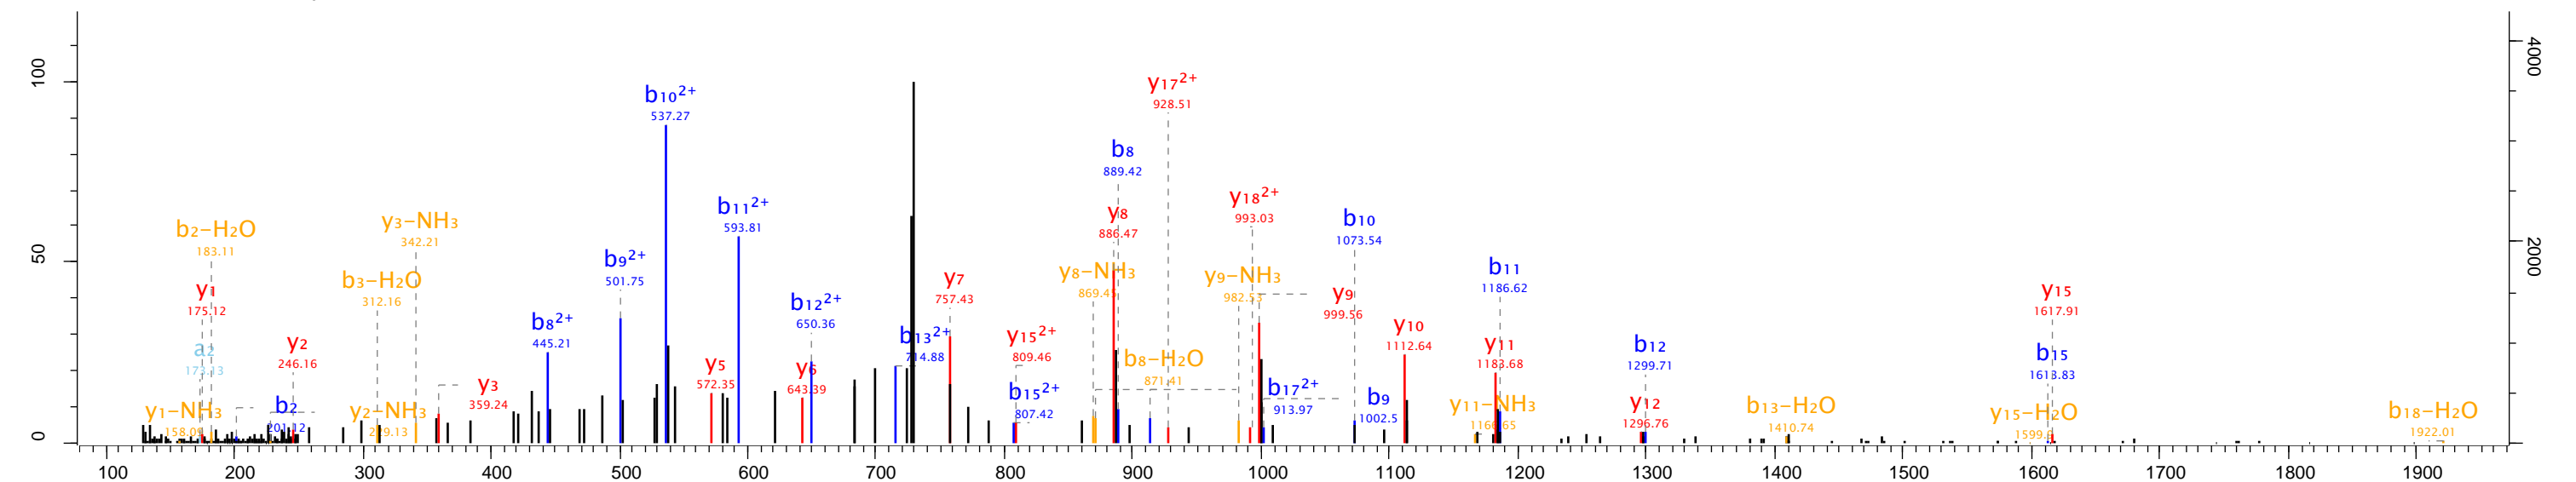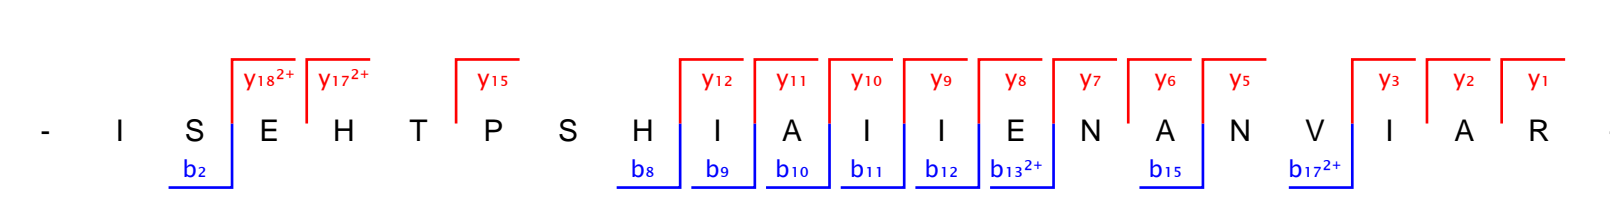

Raw file 2015-01-05\_CL02\_2Excl15sMaxInj70 Scan 10115 Method ITMS; HCD Score 48.57 m/z 466.92

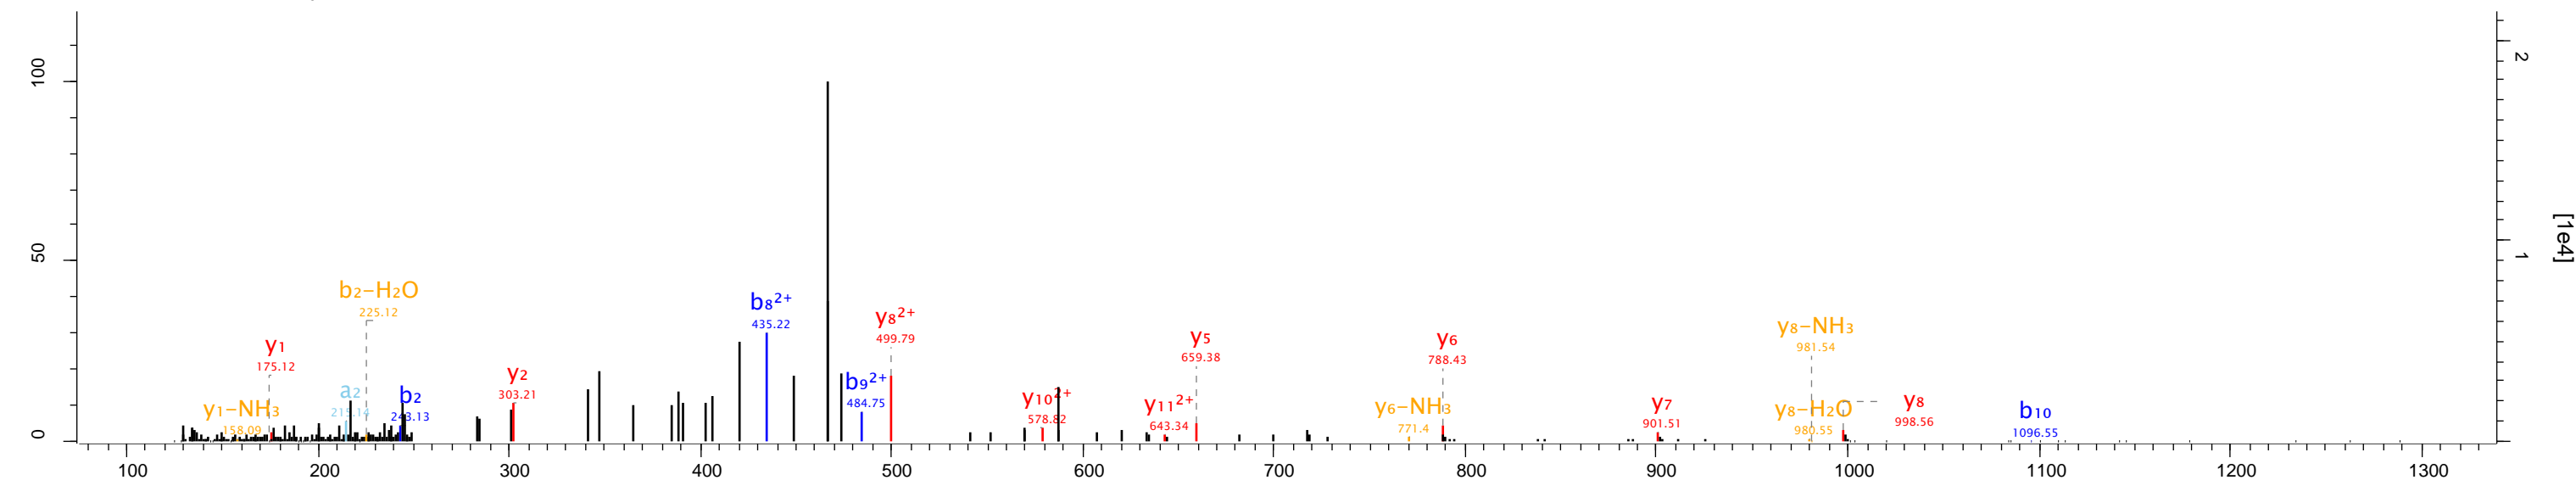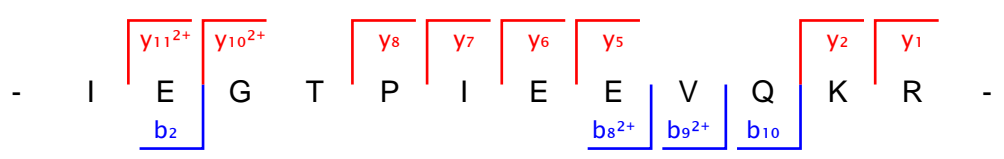

Spectral Annotation for Single-Peptide IDs in 16-cell Embryo using Q-OT-LIT

Raw file 2015-01-05\_CL02\_2Excl15sMaxInj70 Scan 10120 Method ITMS; HCD Score 57.89 m/z 467.26

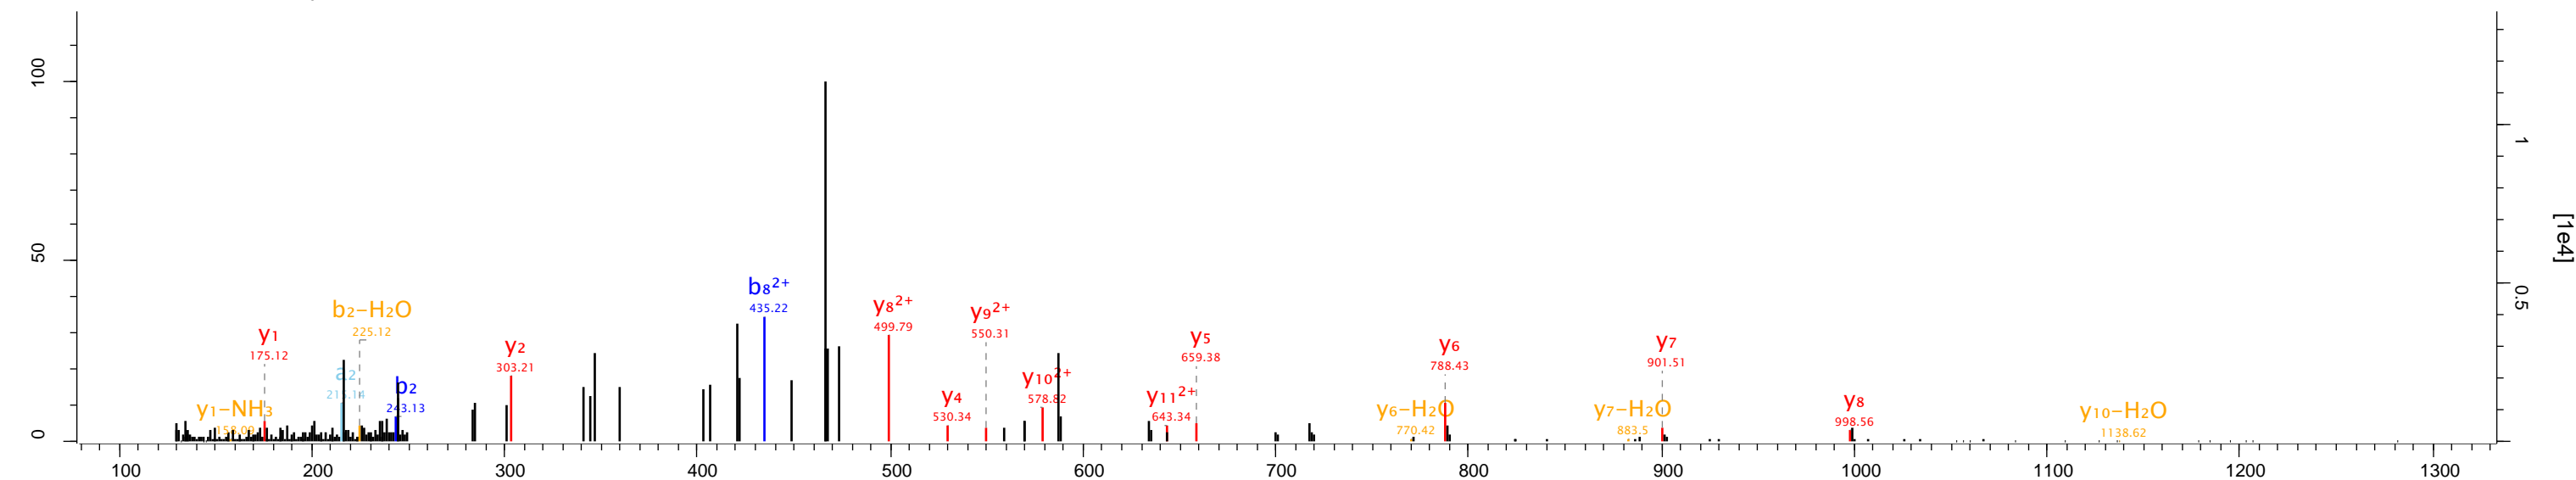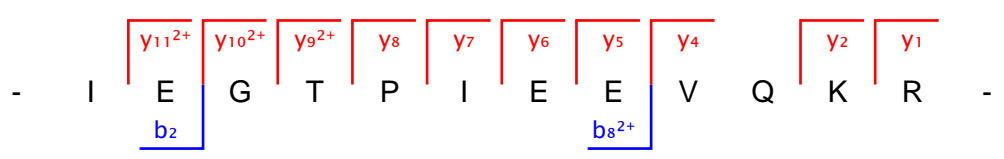

Spectral Annotation for Single-Peptide IDs in 16-cell Embryo using Q-OT-LIT



Raw file Scan Method Score m/z  
 2015-01-05\_CL02\_2Excl15sMaxInj70 10147 ITMS; HCD 56.2 466.92

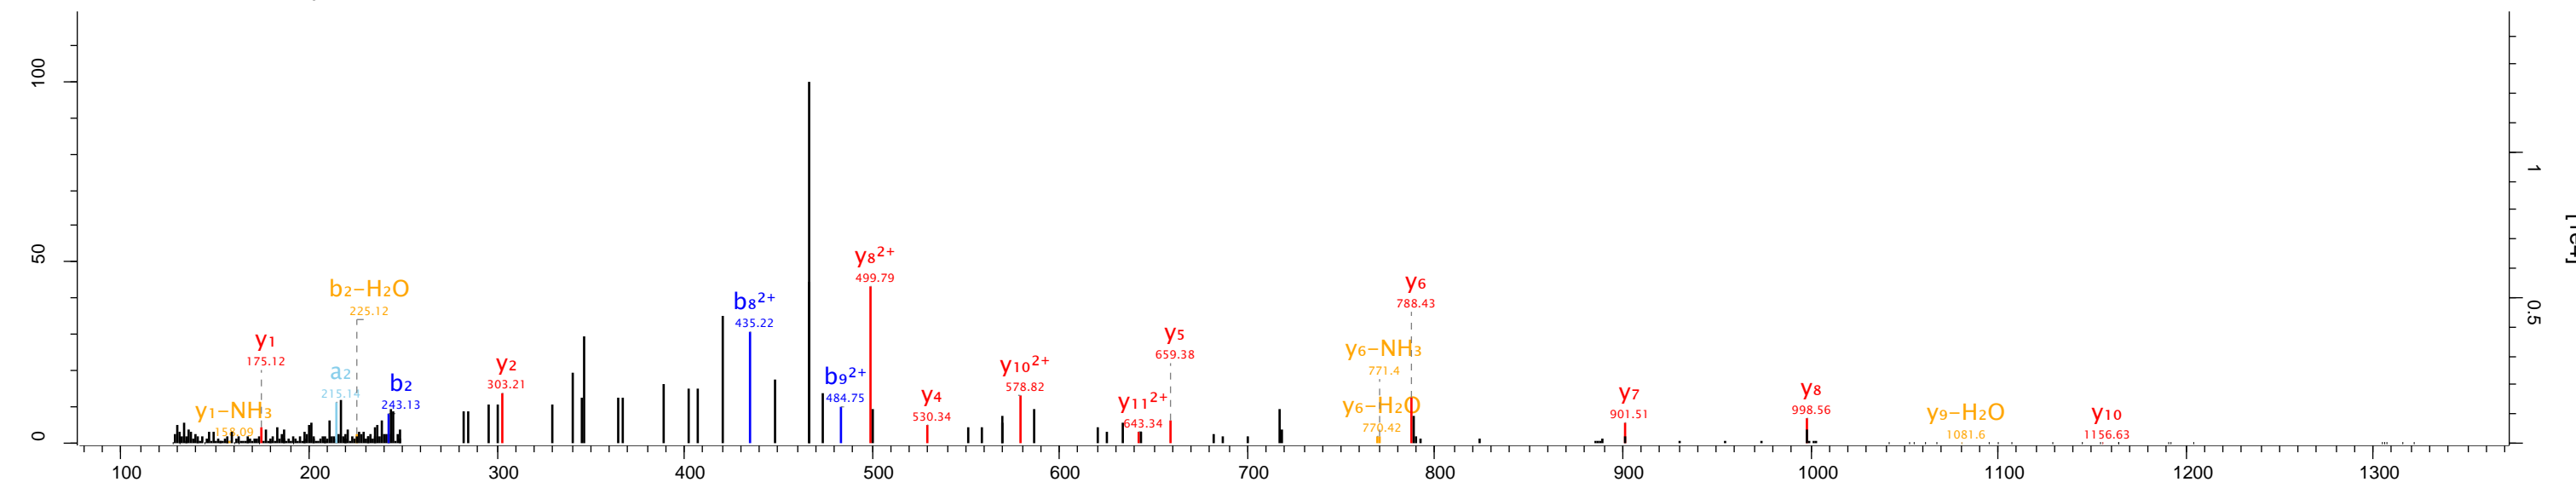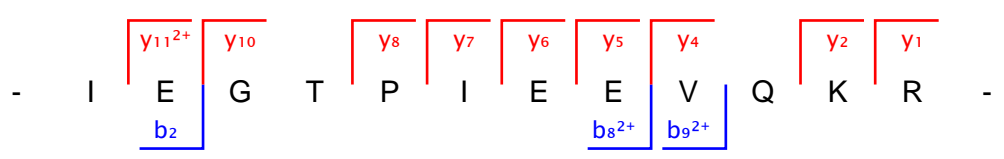

Spectral Annotation for Single-Peptide IDs in 16-cell Embryo using Q-OT-LIT

Raw file 2015-01-05\_CL02\_2Excl15sMaxInj70 Scan 10164 Method ITMS; HCD Score 115.96 m/z 725.14

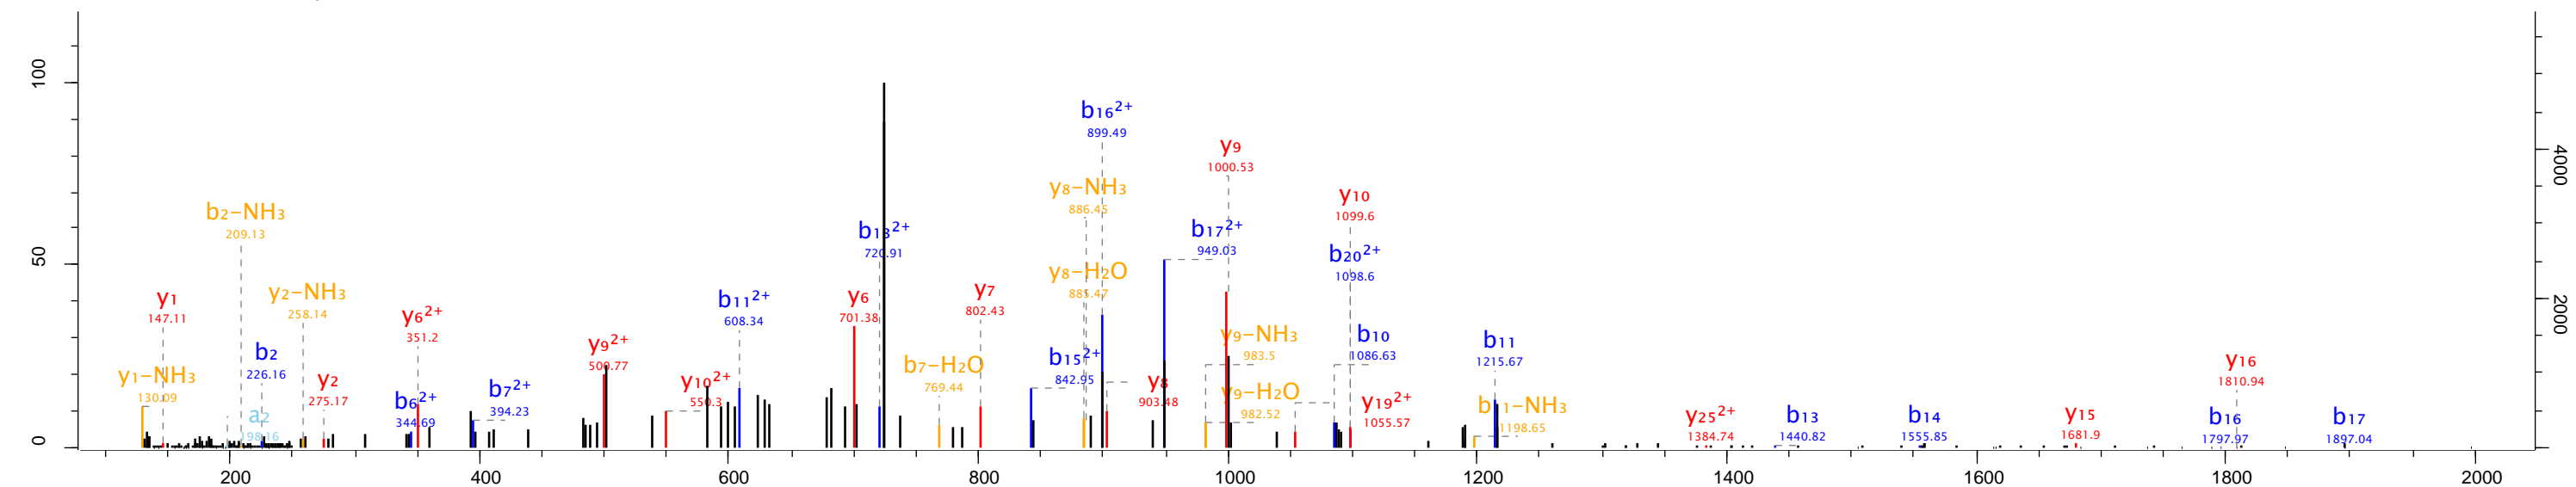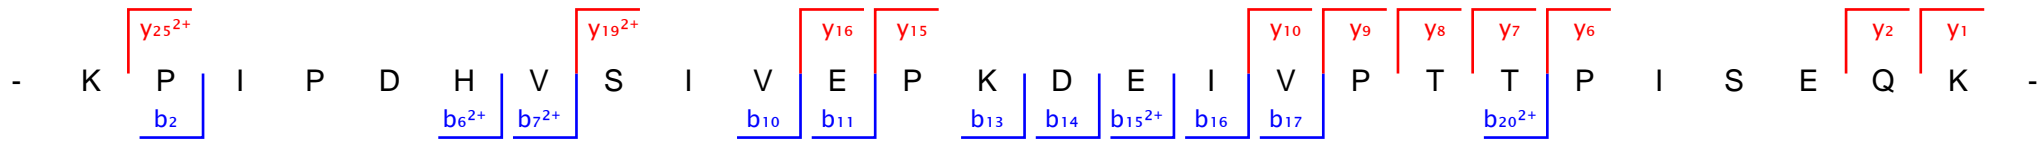

Spectral Annotation for Single-Peptide IDs in 16-cell Embryo using Q-OT-LIT

Raw file 2015-01-05\_CL02\_2Excl15sMaxInj70 Scan 10207 Method ITMS; HCD Score 87.47 m/z 725.14

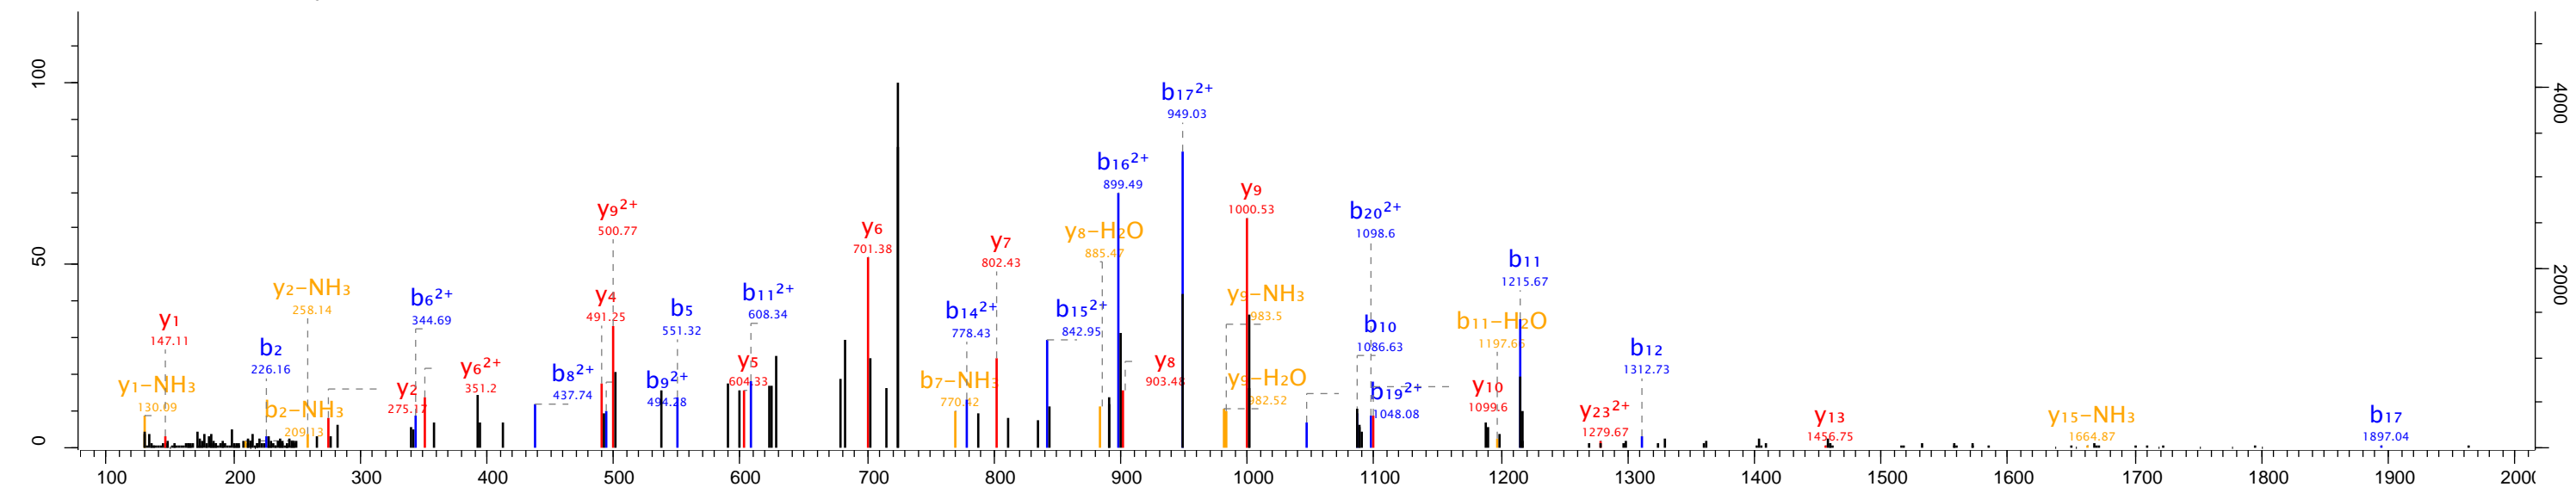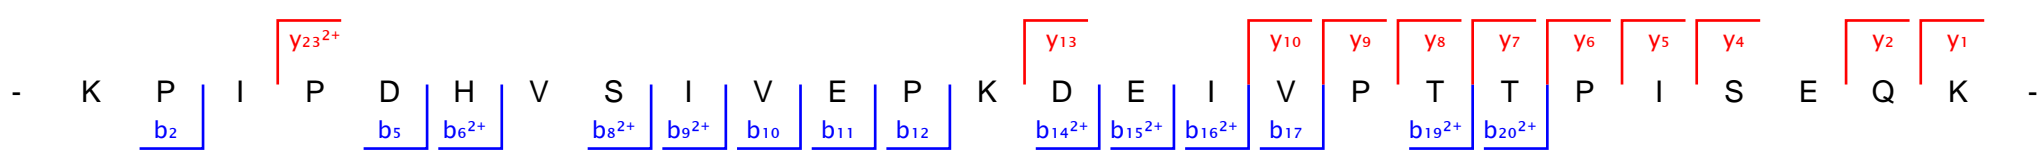

Spectral Annotation for Single-Peptide IDs in 16-cell Embryo using Q-OT-LIT

Raw file 2015-01-05\_CL02\_2Excl15sMaxInj70 Scan 10322 Method ITMS; HCD Score 53.87 m/z 475.57

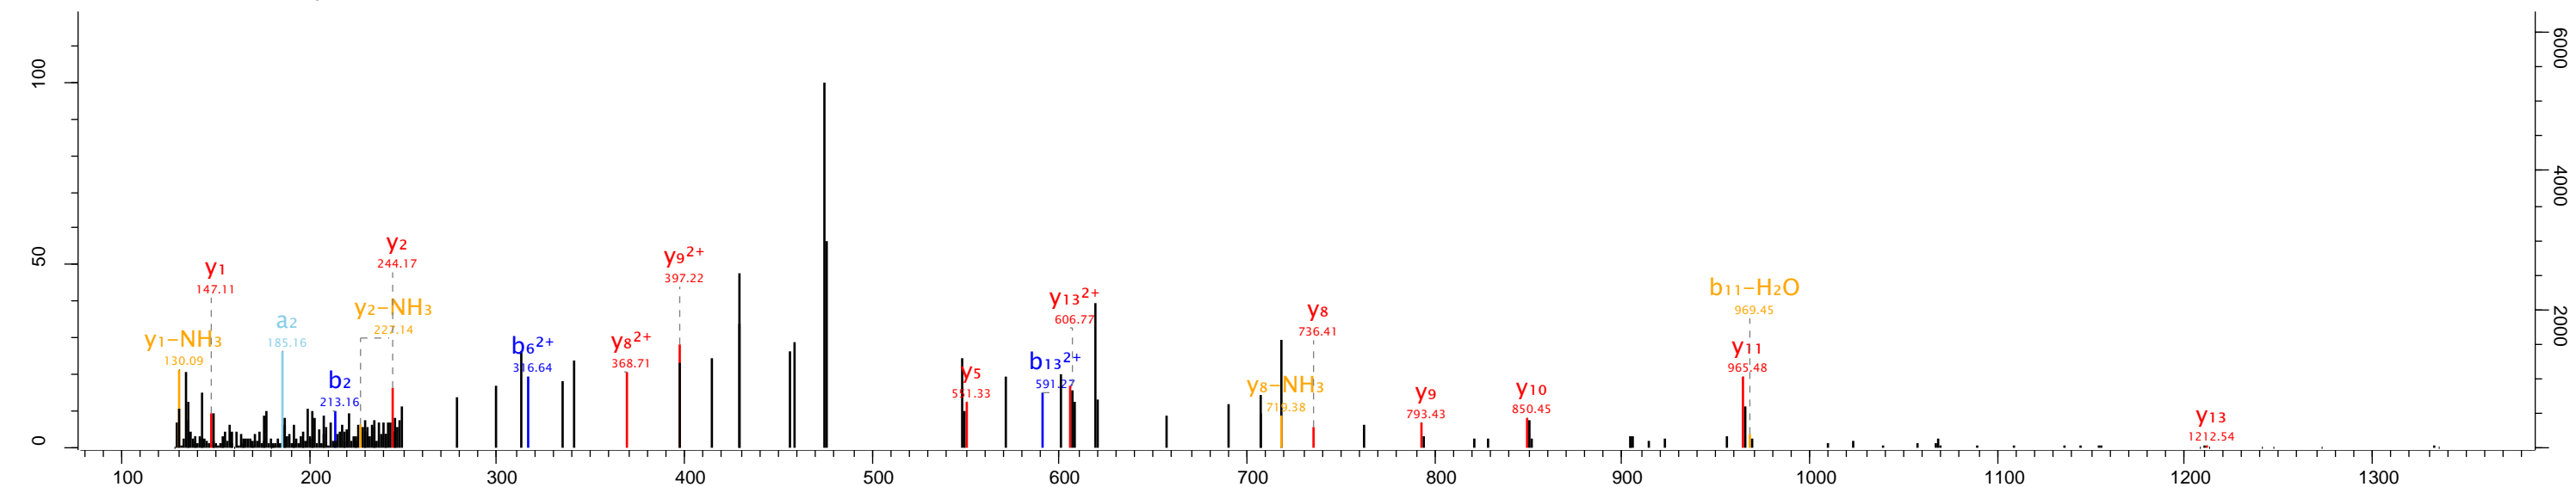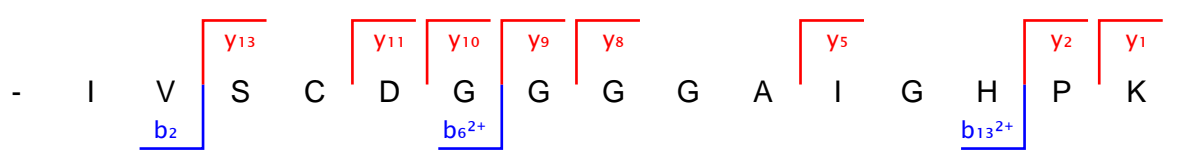

Raw file  
 2015-01-05\_CL02\_2Excl15sMaxInj70  
 Scan 10498 Method ITMS; HCD Score 44.25 m/z 519.64

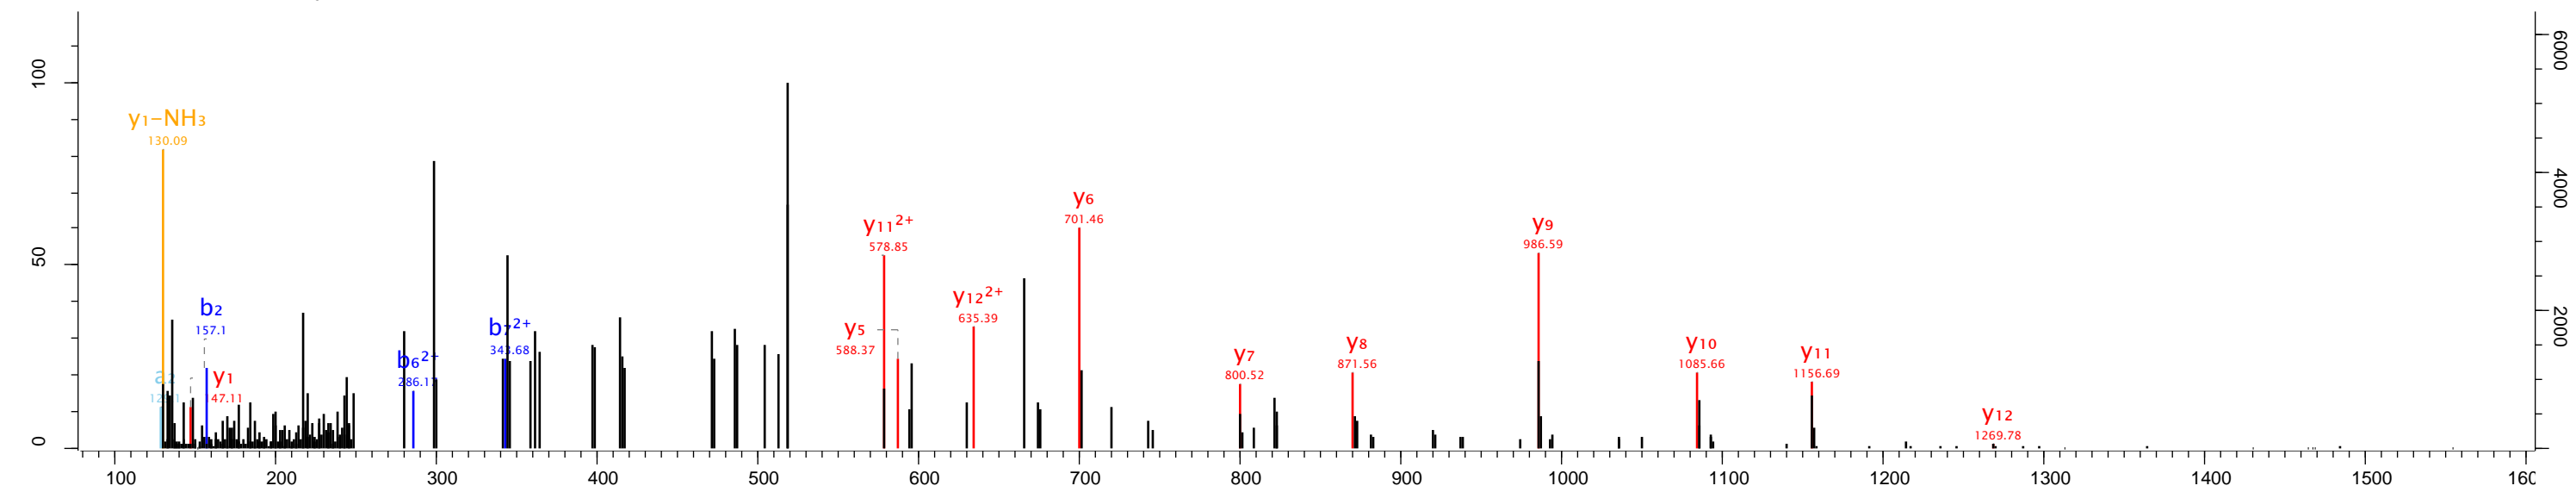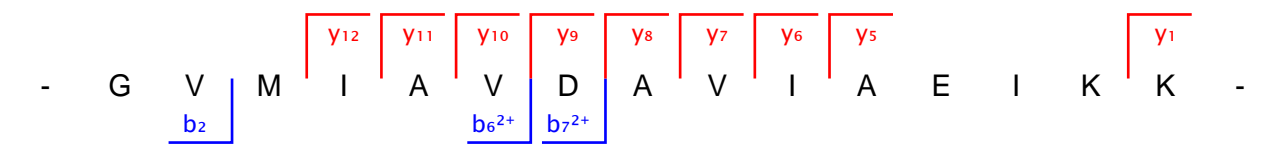

Raw file: 2015-01-05\_CL02\_2Excl15sMaxInj70  
 Scan: 10552 Method: ITMS; HCD Score: 142.84 m/z: 594.55

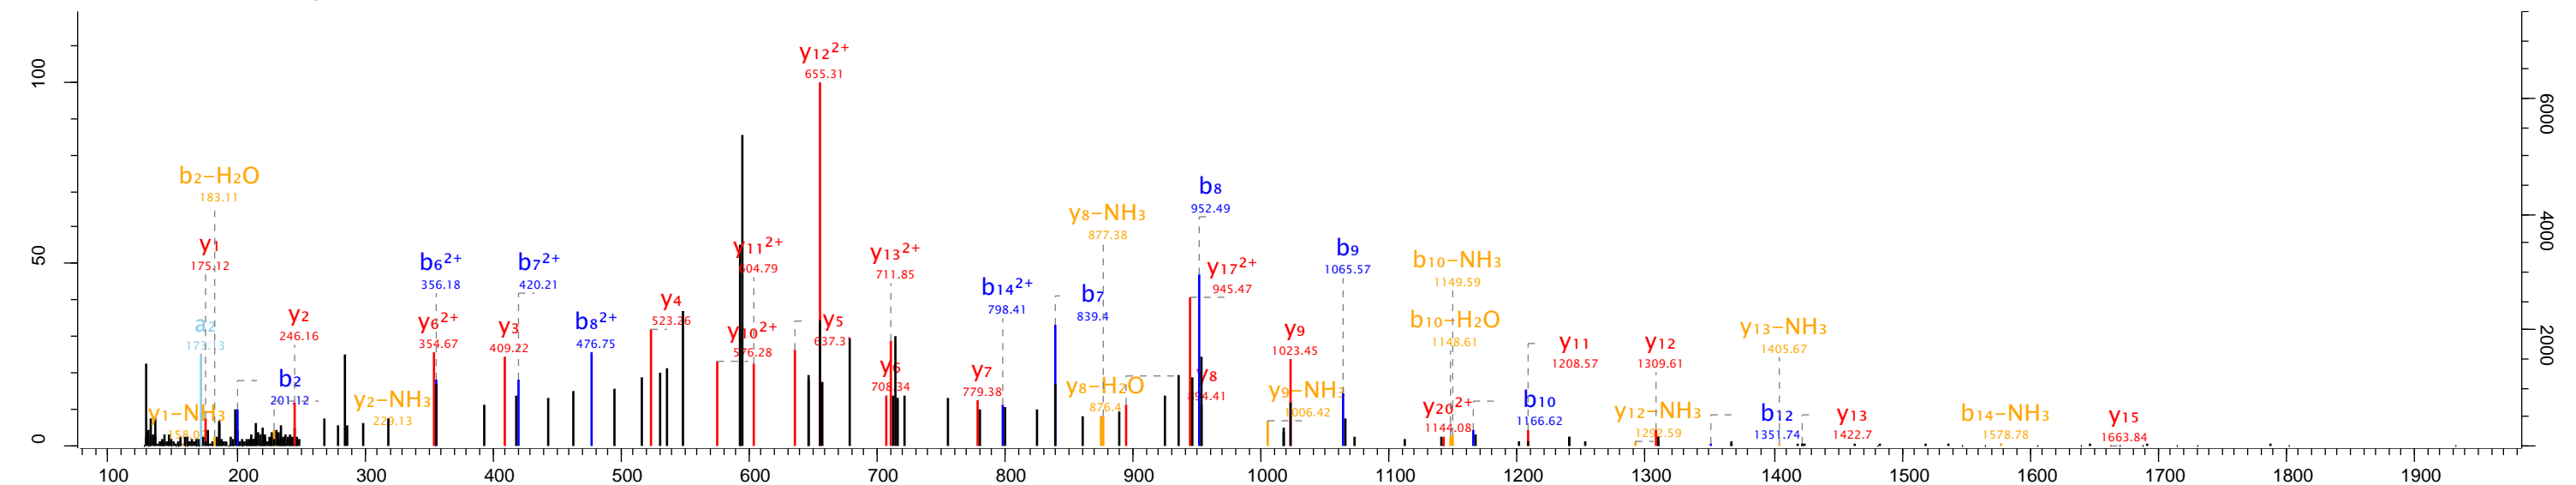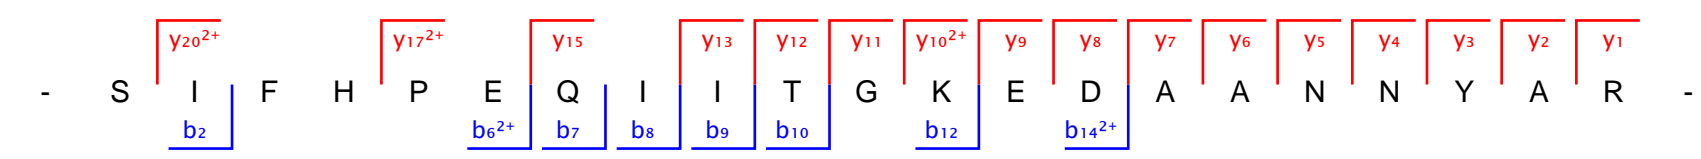

Spectral Annotation for Single-Peptide IDs in 16-cell Embryo using Q-OT-LIT

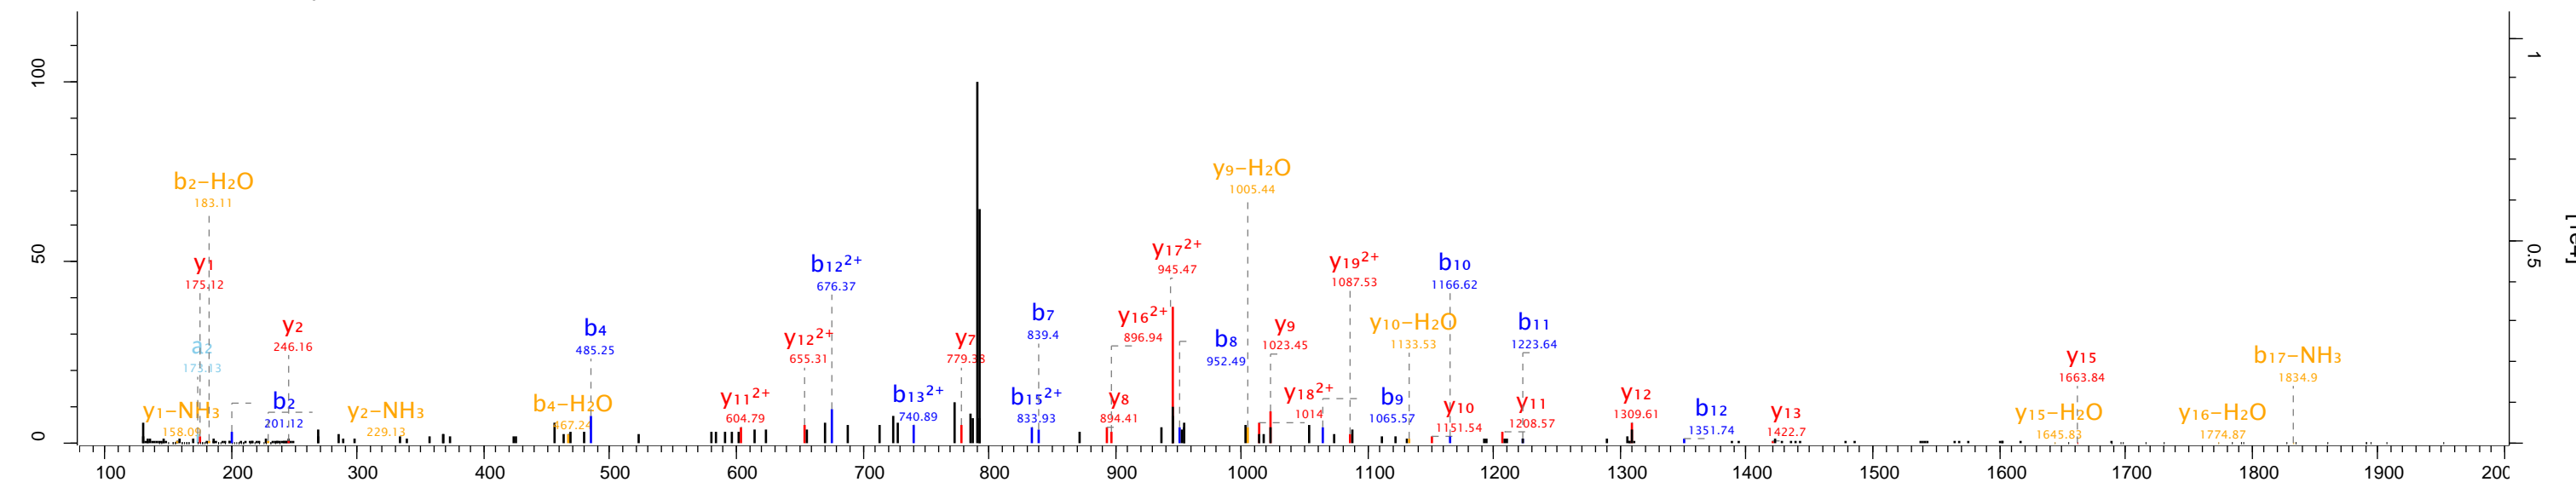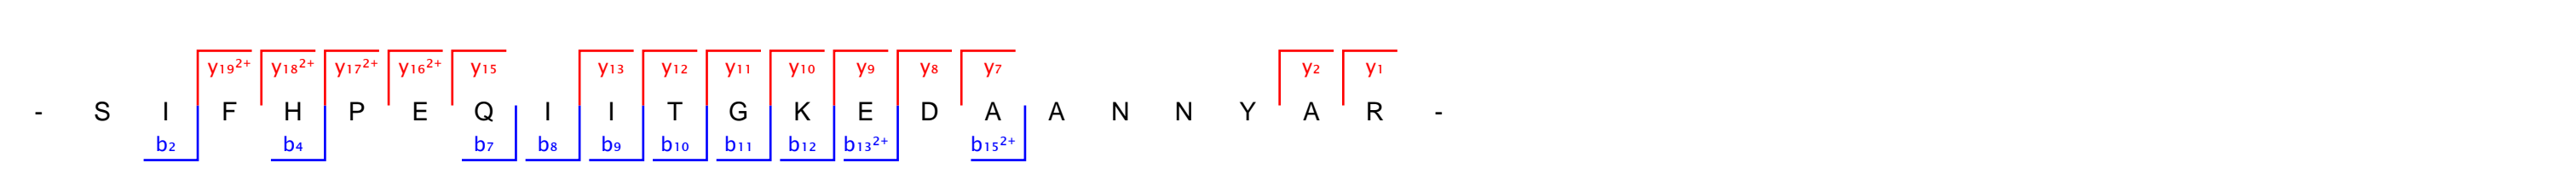

Raw file: 2015-01-05\_CL02\_2Excl15sMaxInj70  
 Scan: 10611 Method: ITMS; HCD Score: 146.28 m/z: 594.55

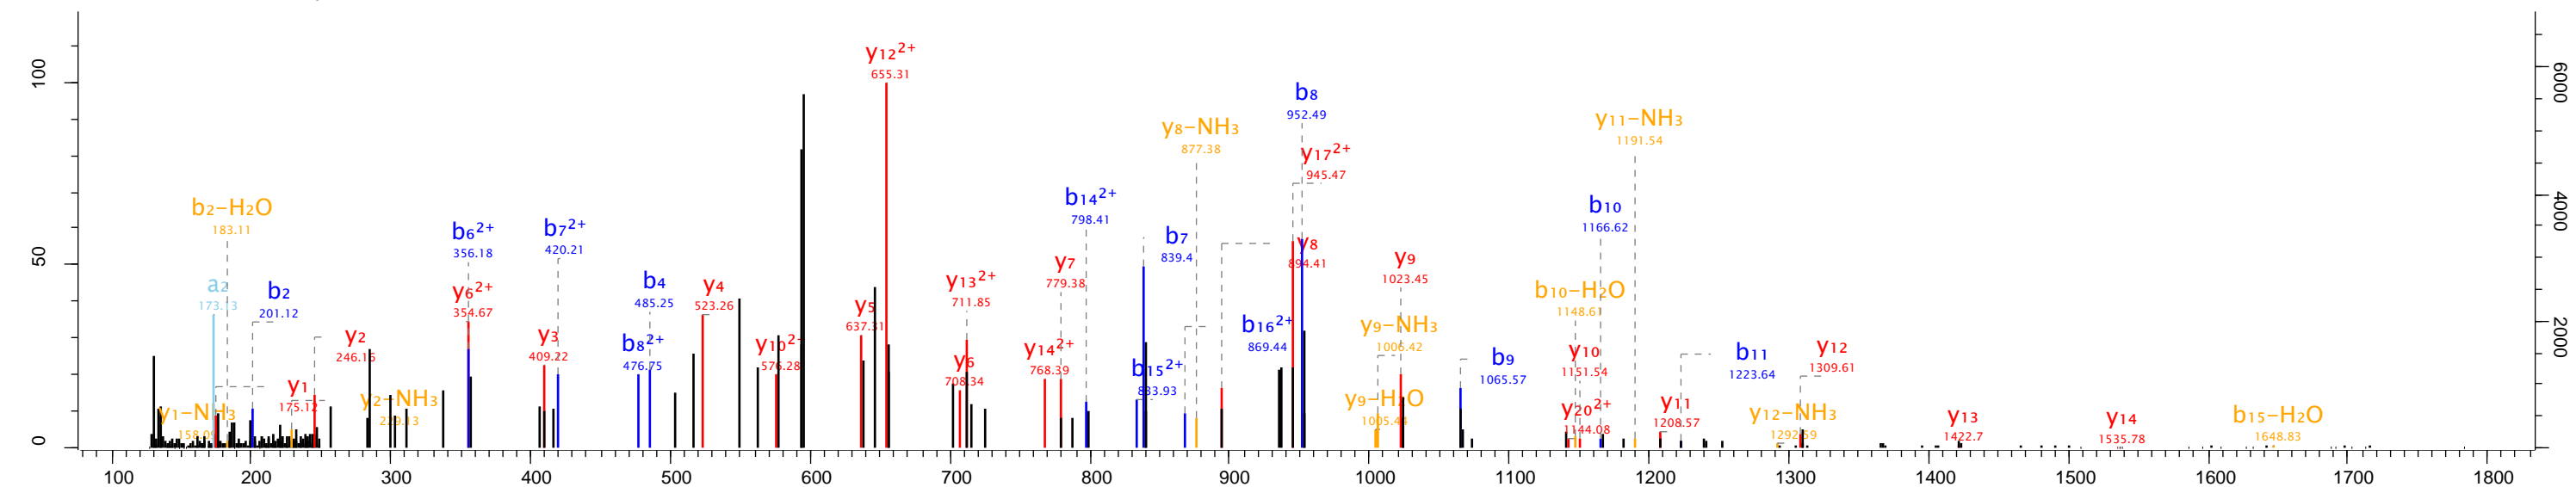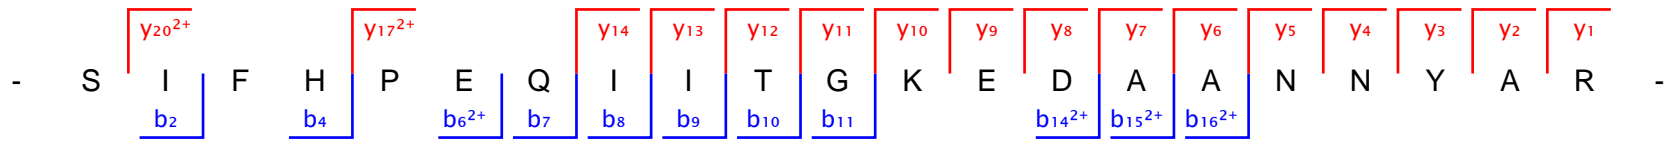

Spectral Annotation for Single-Peptide IDs in 16-cell Embryo using Q-OT-LIT



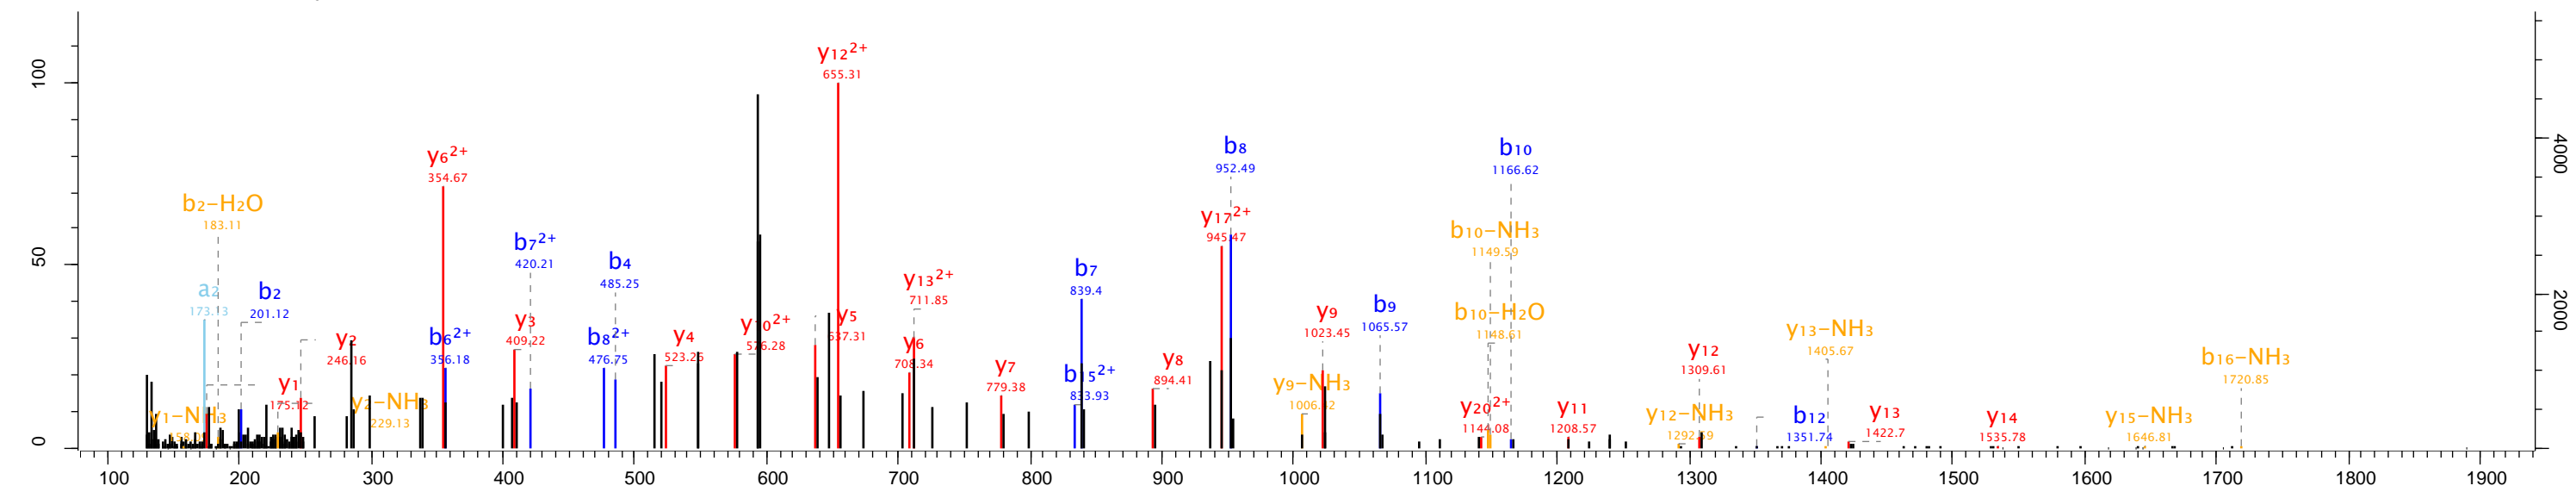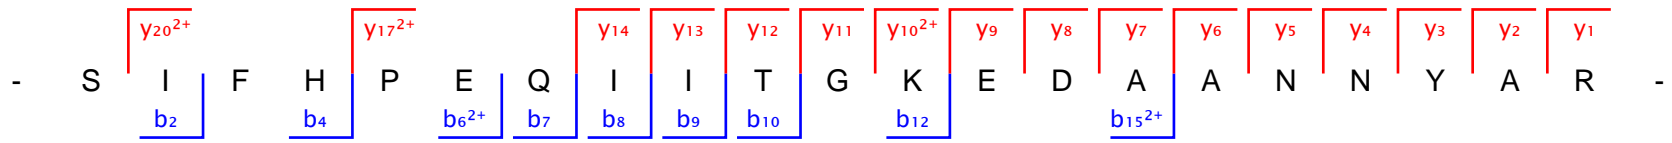

Raw file: 2015-01-05\_CL02\_2Excl15sMaxInj70  
 Scan: 10709 Method: ITMS; HCD Score: 77.89 m/z: 564.97

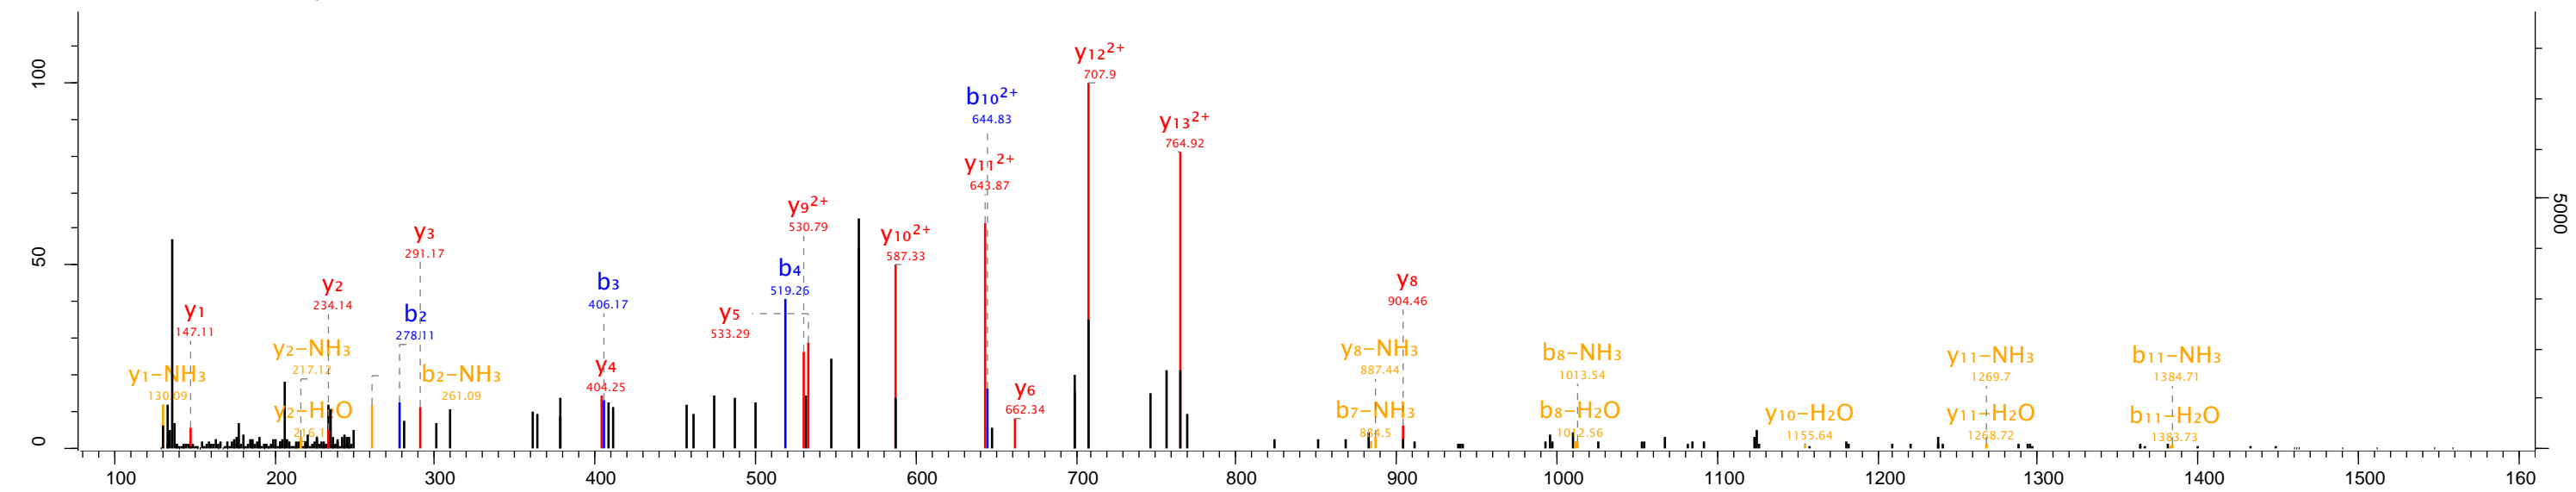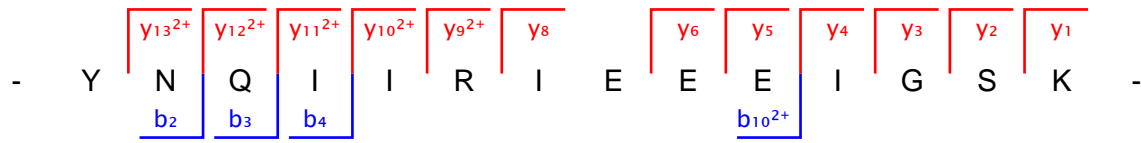

Spectral Annotation for Single-Peptide IDs in 16-cell Embryo using Q-OT-LIT

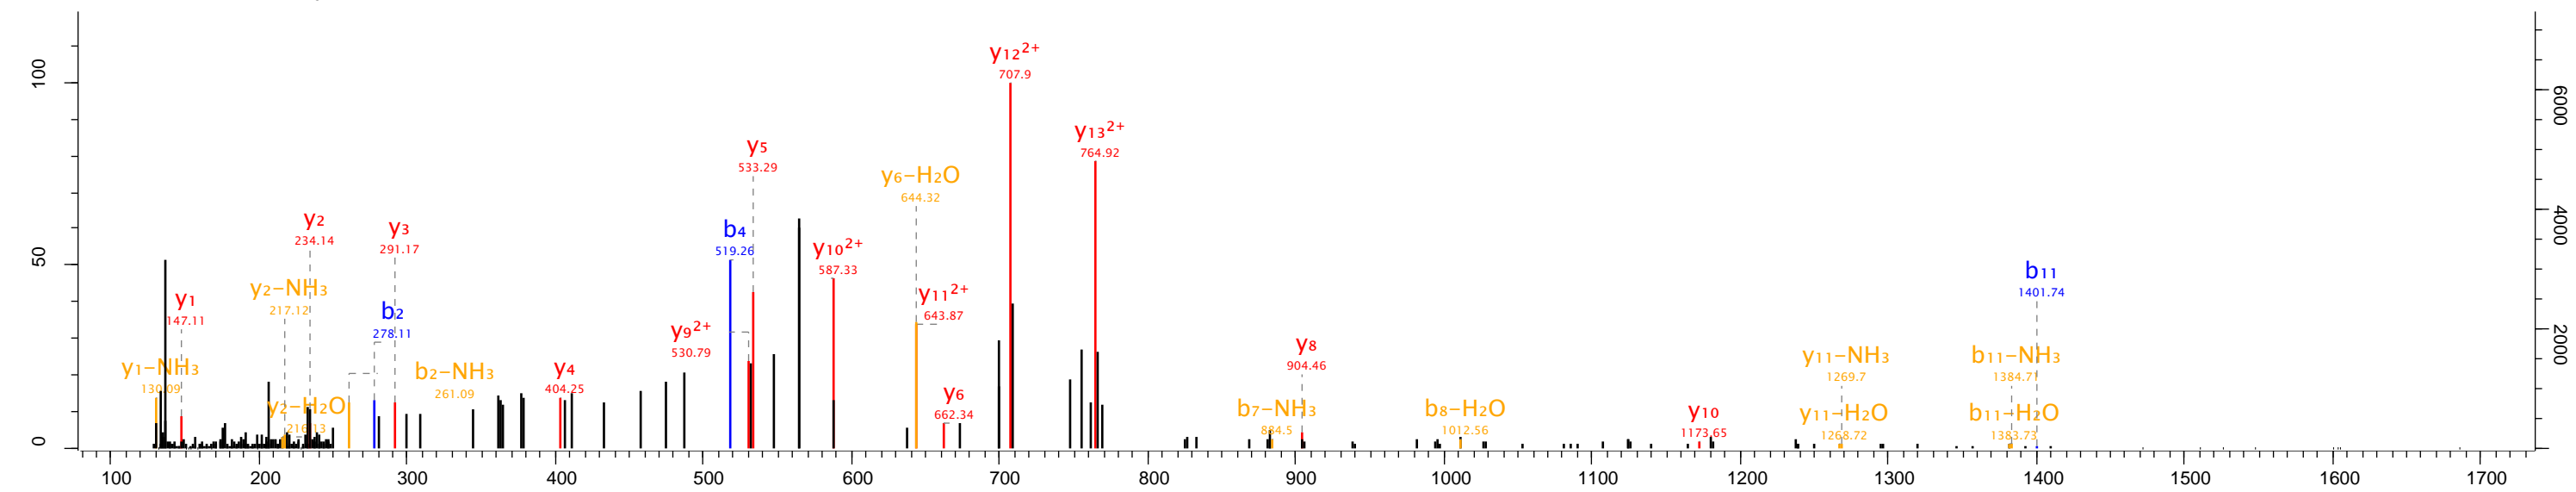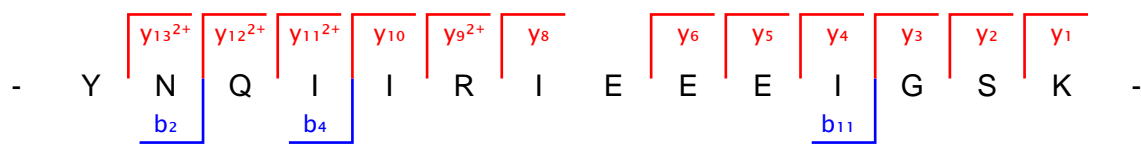

Raw file 2015-01-05\_CL02\_2Excl15sMaxInj70 Scan 10749 Method ITMS; HCD Score 78.92 m/z 634.32

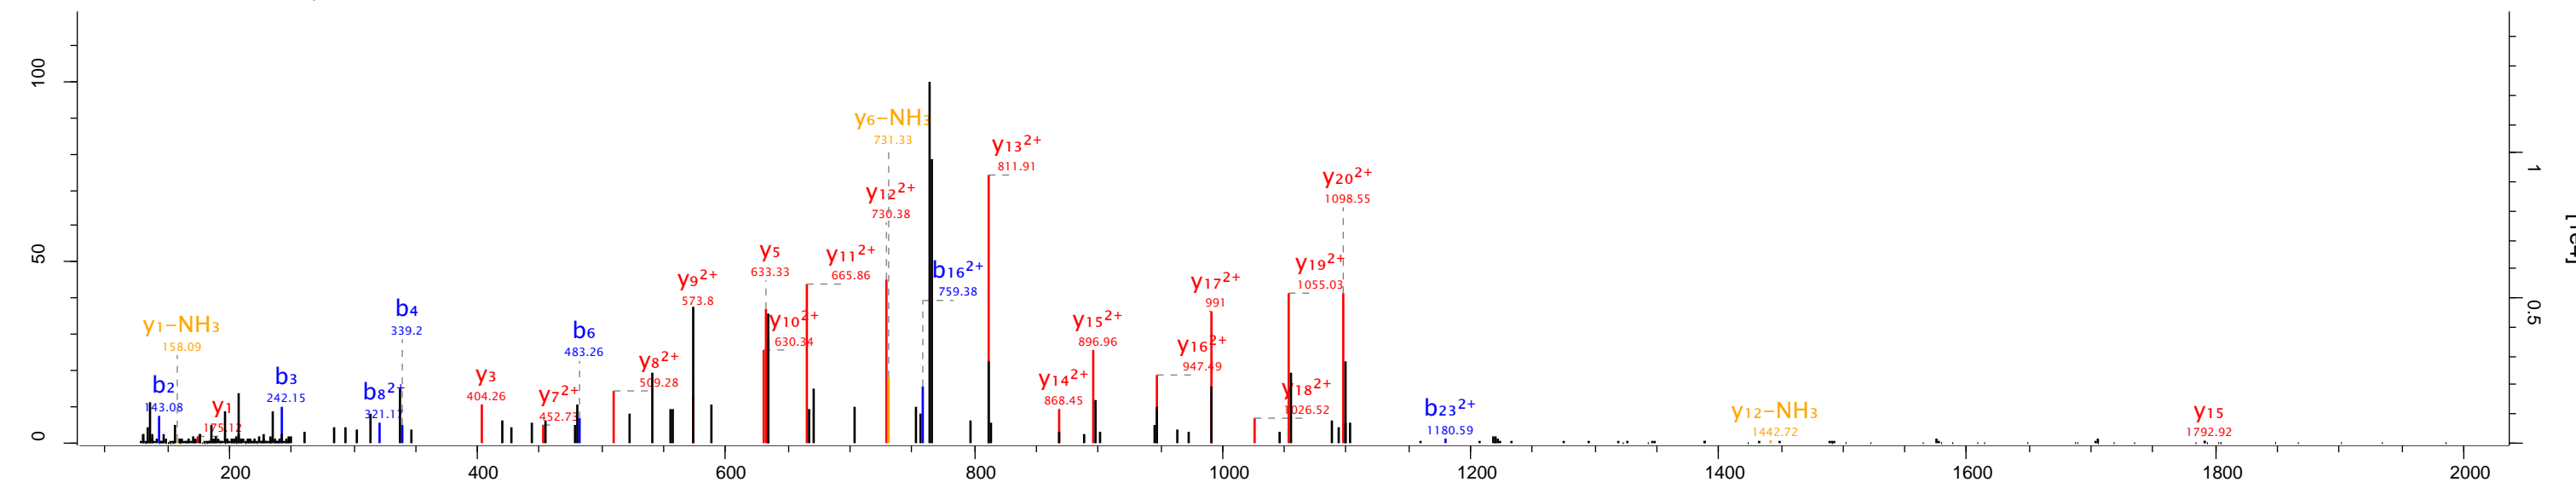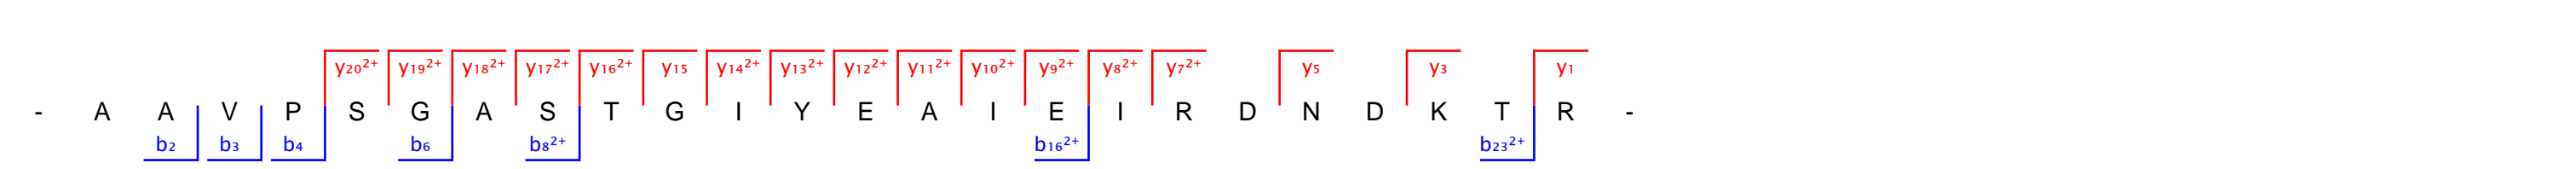

Raw file: 2015-01-05\_CL02\_2Excl15sMaxInj70  
 Scan: 10753 Method: ITMS; HCD Score: 60.35 m/z: 564.97

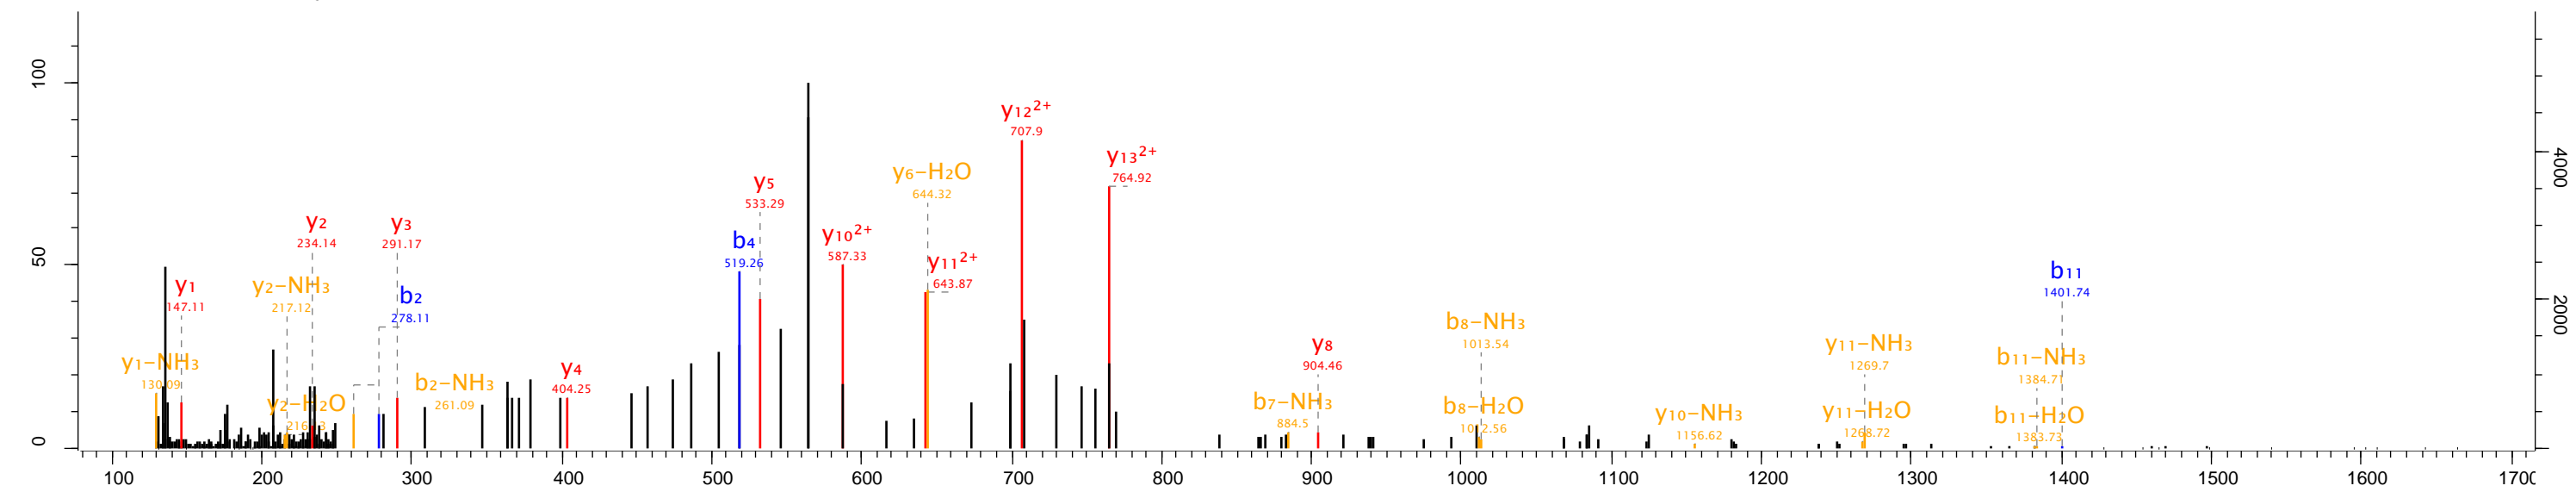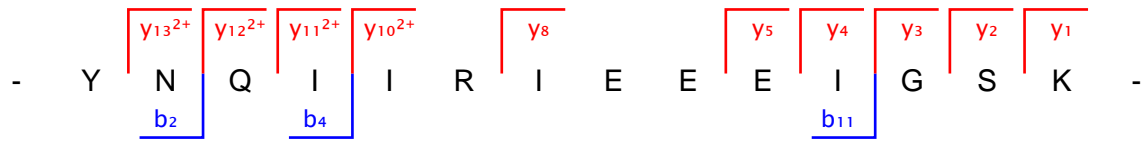

Spectral Annotation for Single-Peptide IDs in 16-cell Embryo using Q-OT-LIT

Raw file 2015-01-05\_CL02\_2Excl15sMaxInj70 Scan 10772 Method ITMS; HCD Score 99.99 m/z 517.93

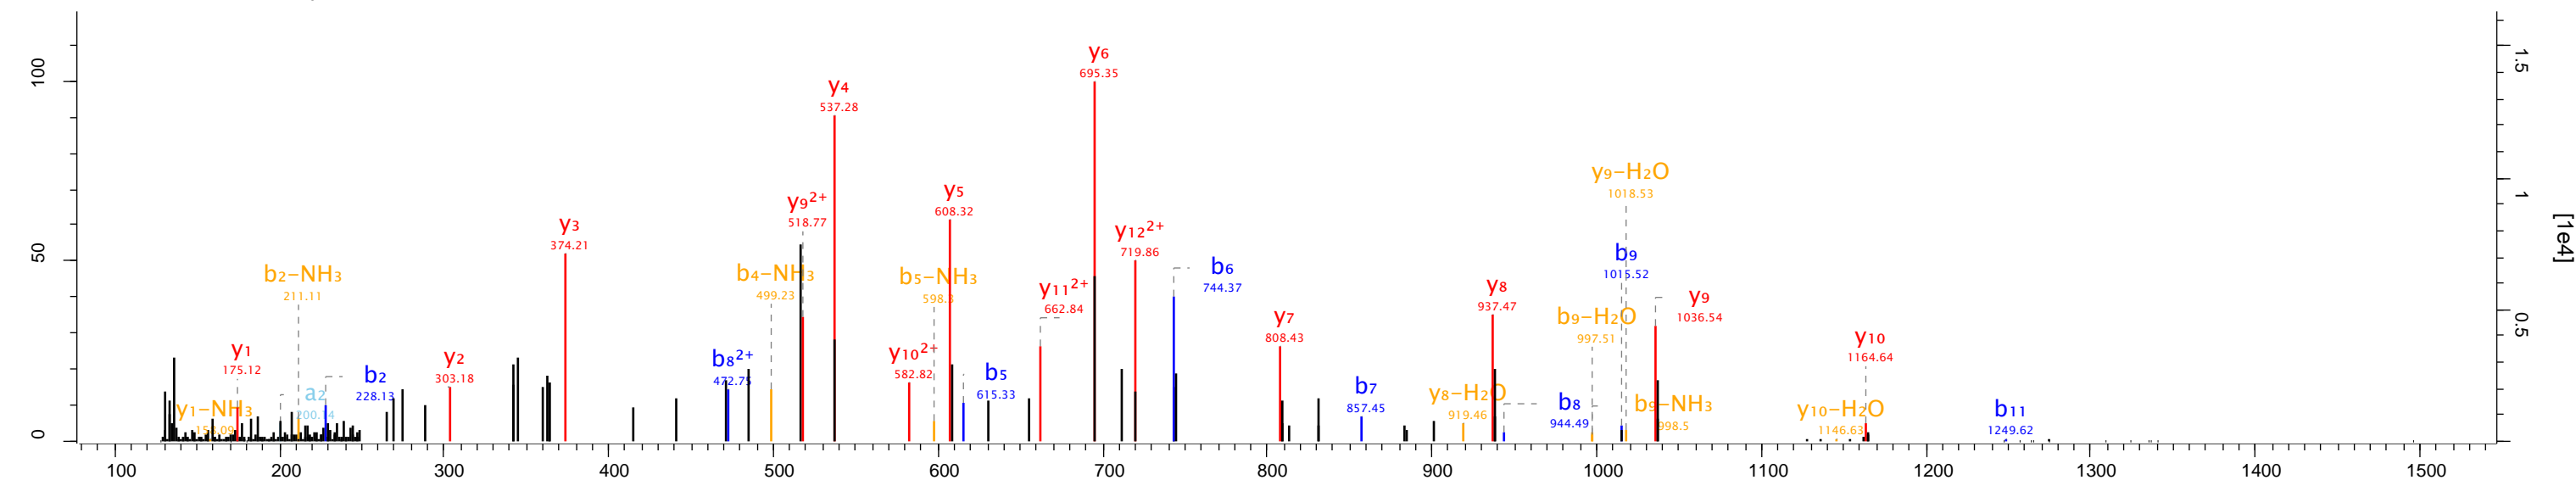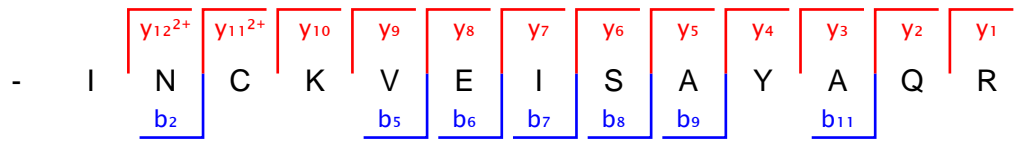

Spectral Annotation for Single-Peptide IDs in 16-cell Embryo using Q-OT-LIT

Raw file 2015-01-05\_CL02\_2Excl15sMaxInj70 Scan 10790 Method ITMS; HCD Score 69.26 m/z 634.57

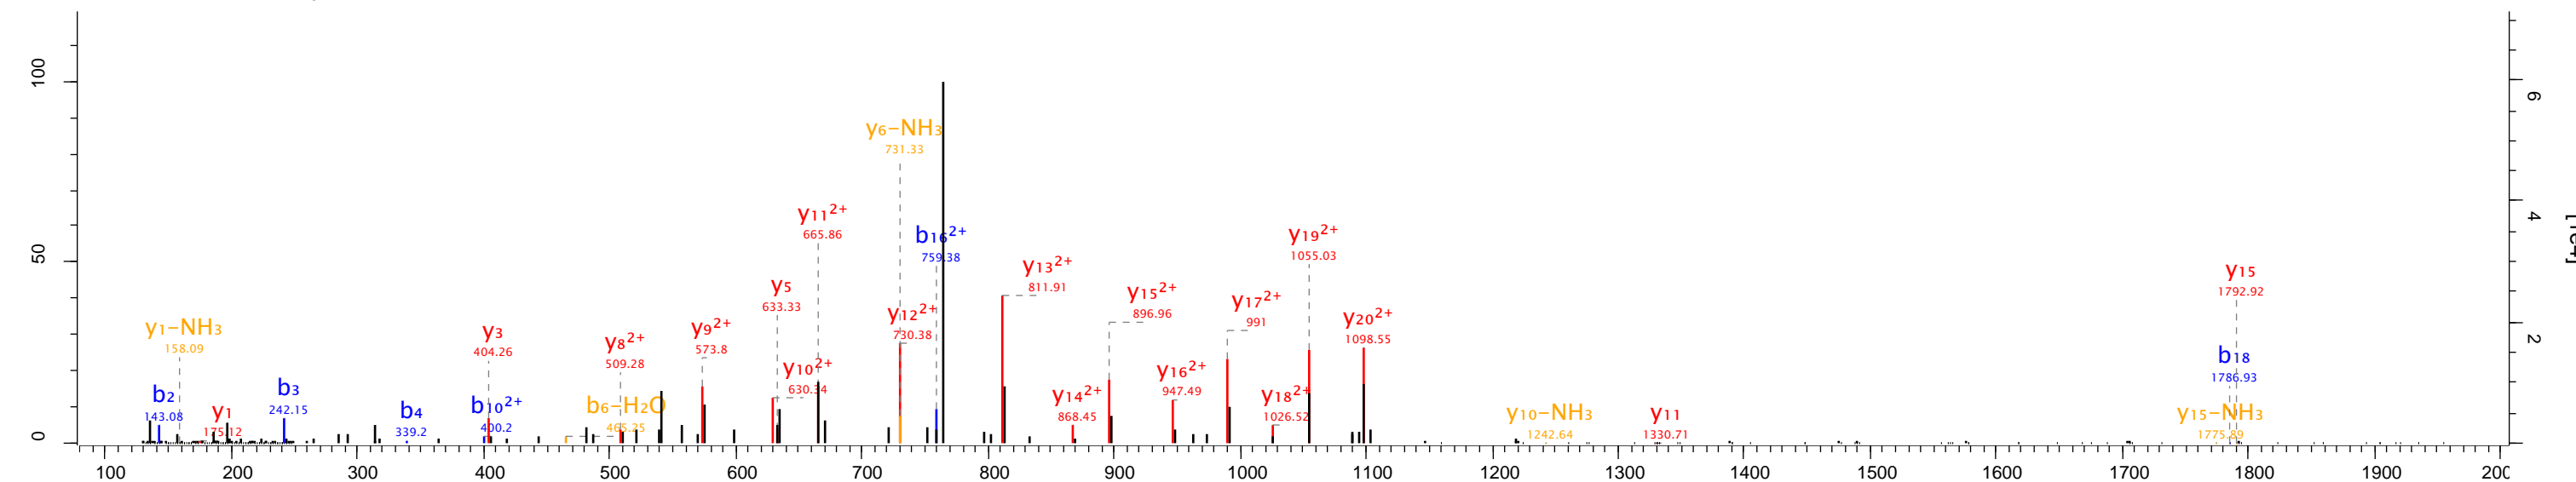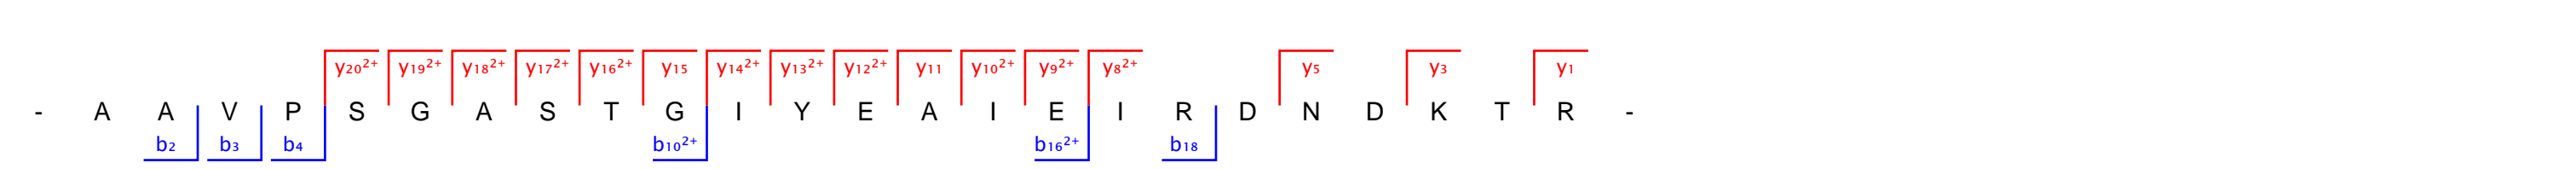

Raw file: 2015-01-05\_CL02\_2Excl15sMaxInj70  
 Scan: 10791 Method: ITMS; HCD Score: 118.73 m/z: 518.27

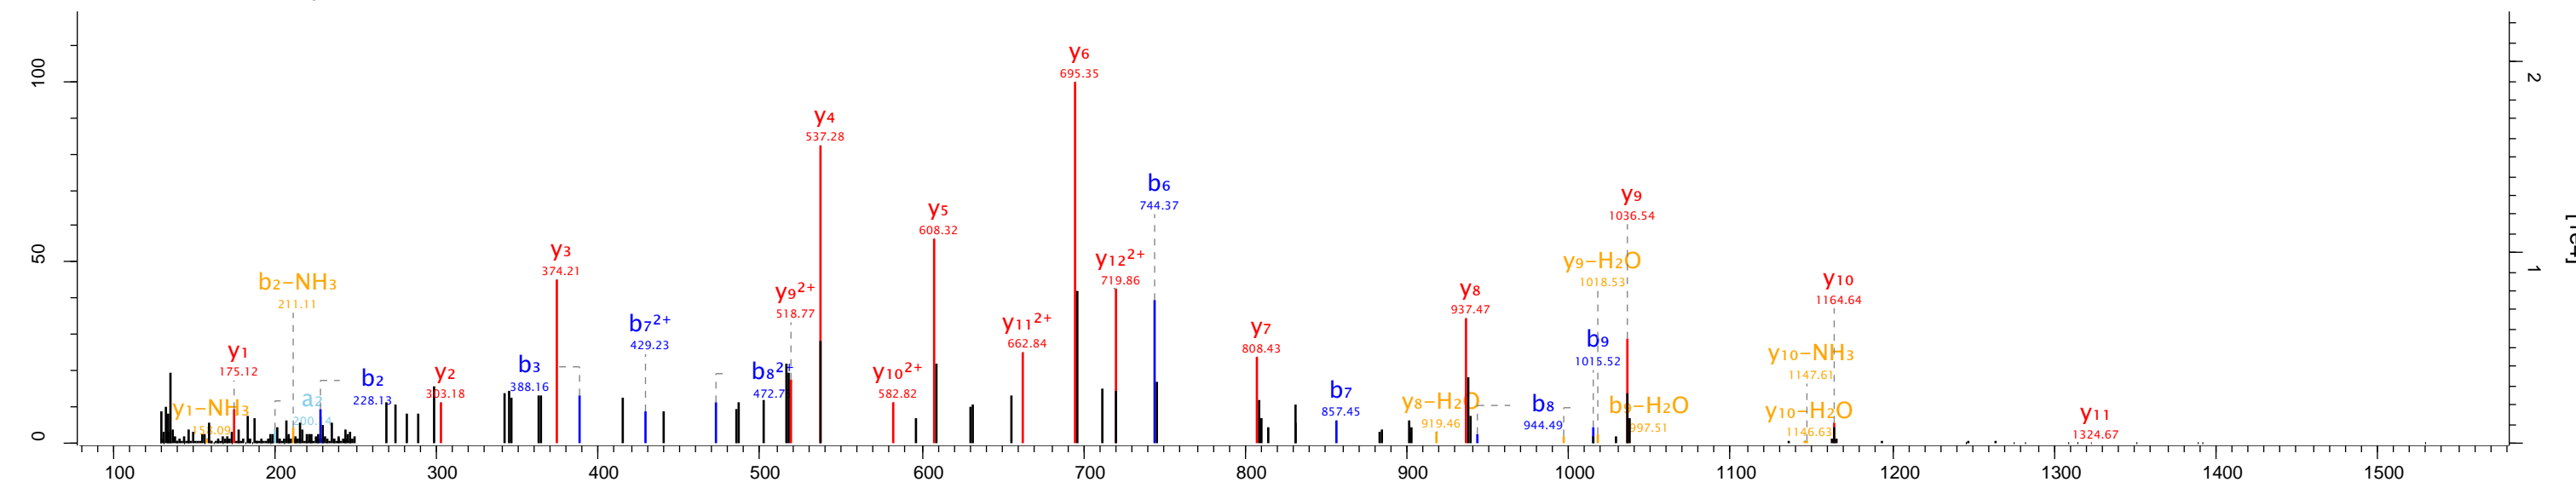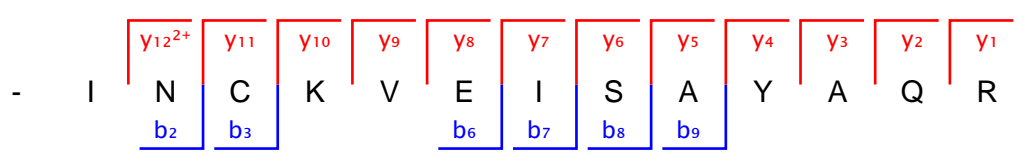

Spectral Annotation for Single-Peptide IDs in 16-cell Embryo using Q-OT-LIT



Raw file 2015-01-05\_CL02\_2Excl15sMaxInj70 Scan 10814 Method ITMS; HCD Score 120.6 m/z 517.93

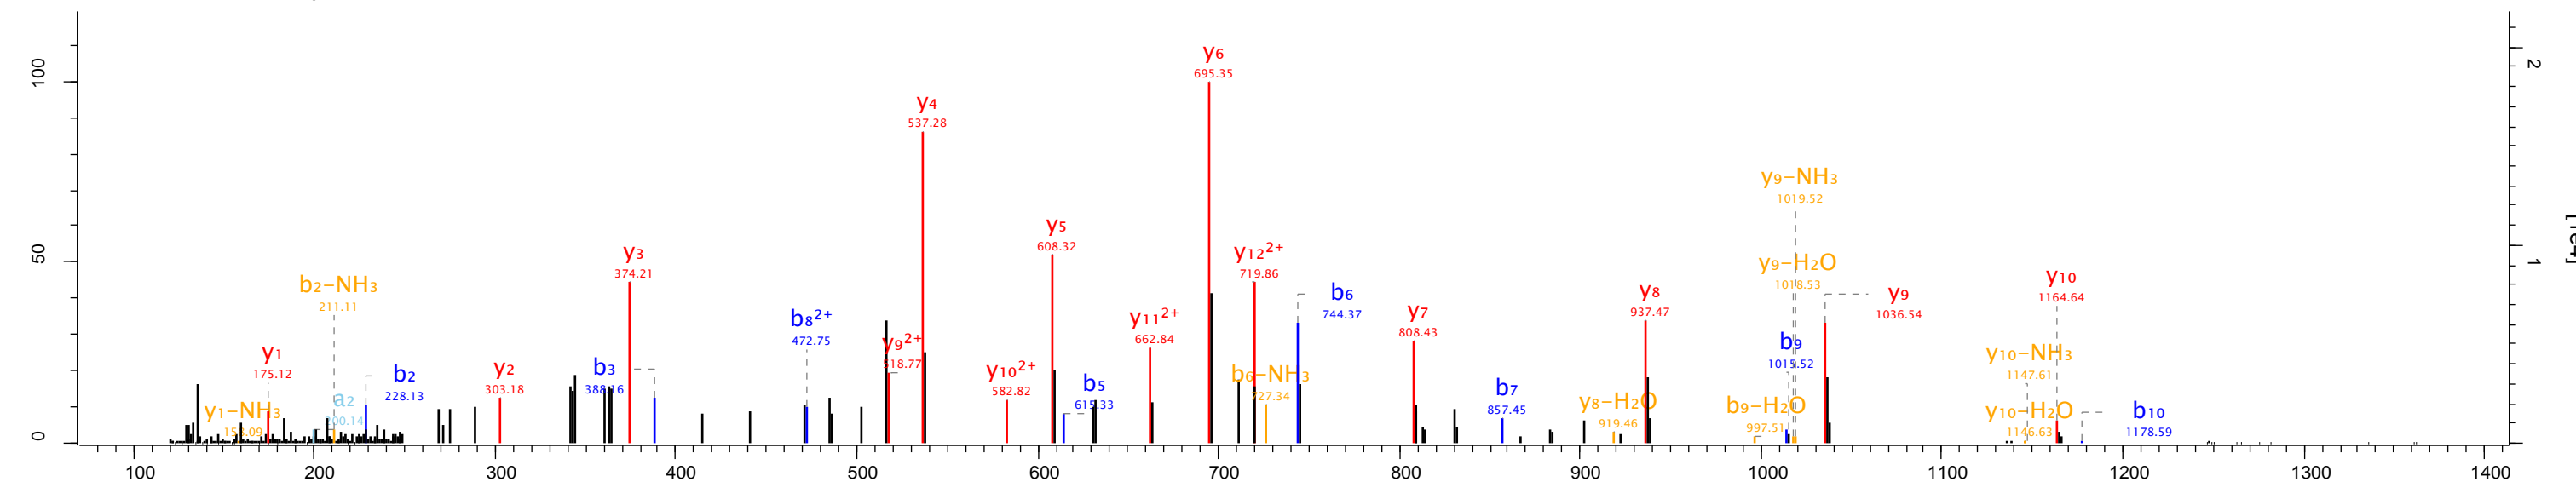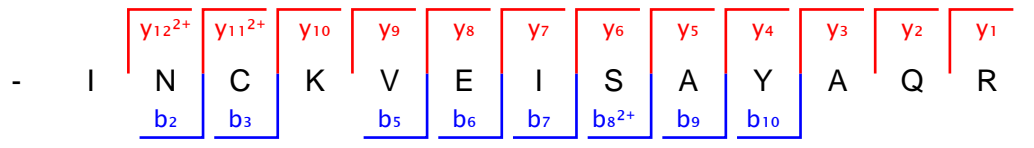

Spectral Annotation for Single-Peptide IDs in 16-cell Embryo using Q-OT-LIT

Raw file 2015-01-05\_CL02\_2Excl15sMaxInj70 Scan 10817 Method ITMS; HCD Score 54.22 m/z 845.43

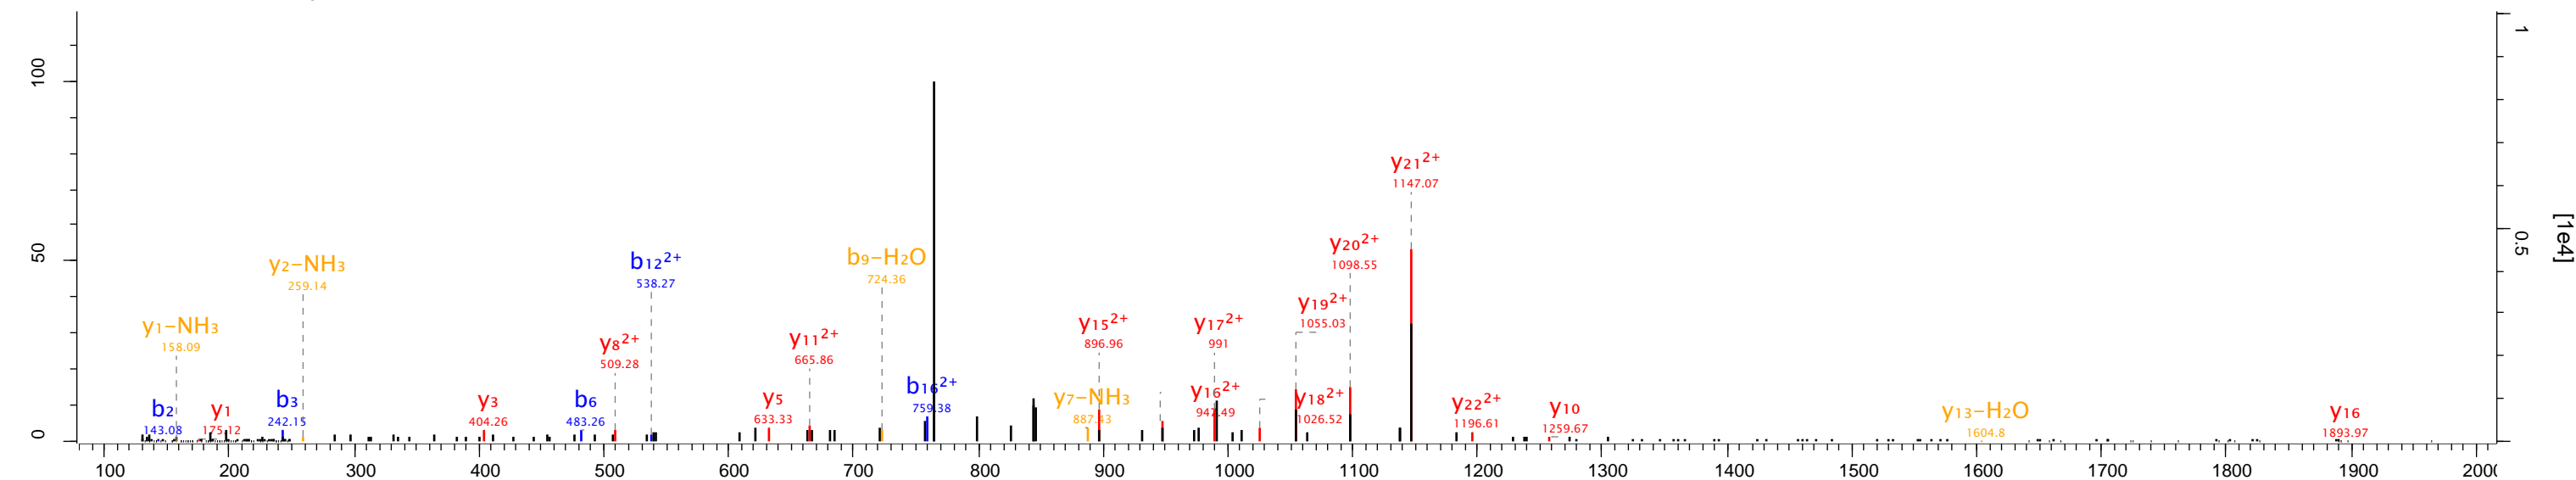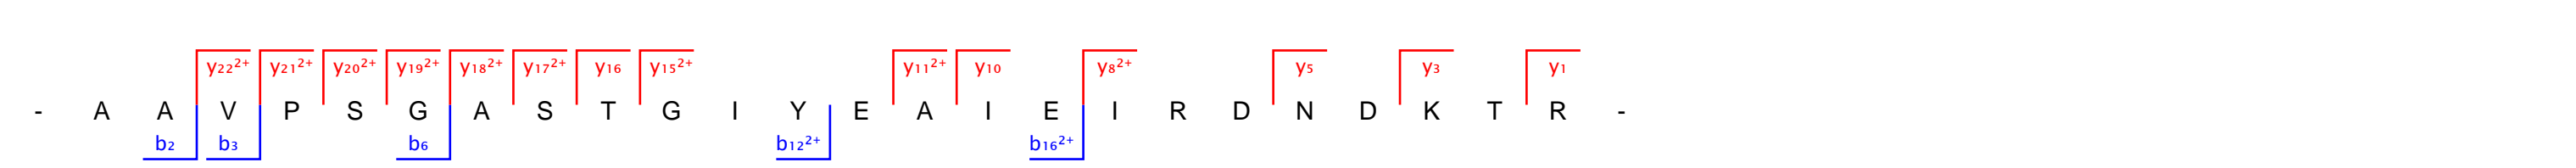

Raw file 2015-01-05\_CL02\_2Excl15sMaxInj70 Scan 10837 Method ITMS; HCD Score 85.84 m/z 517.93

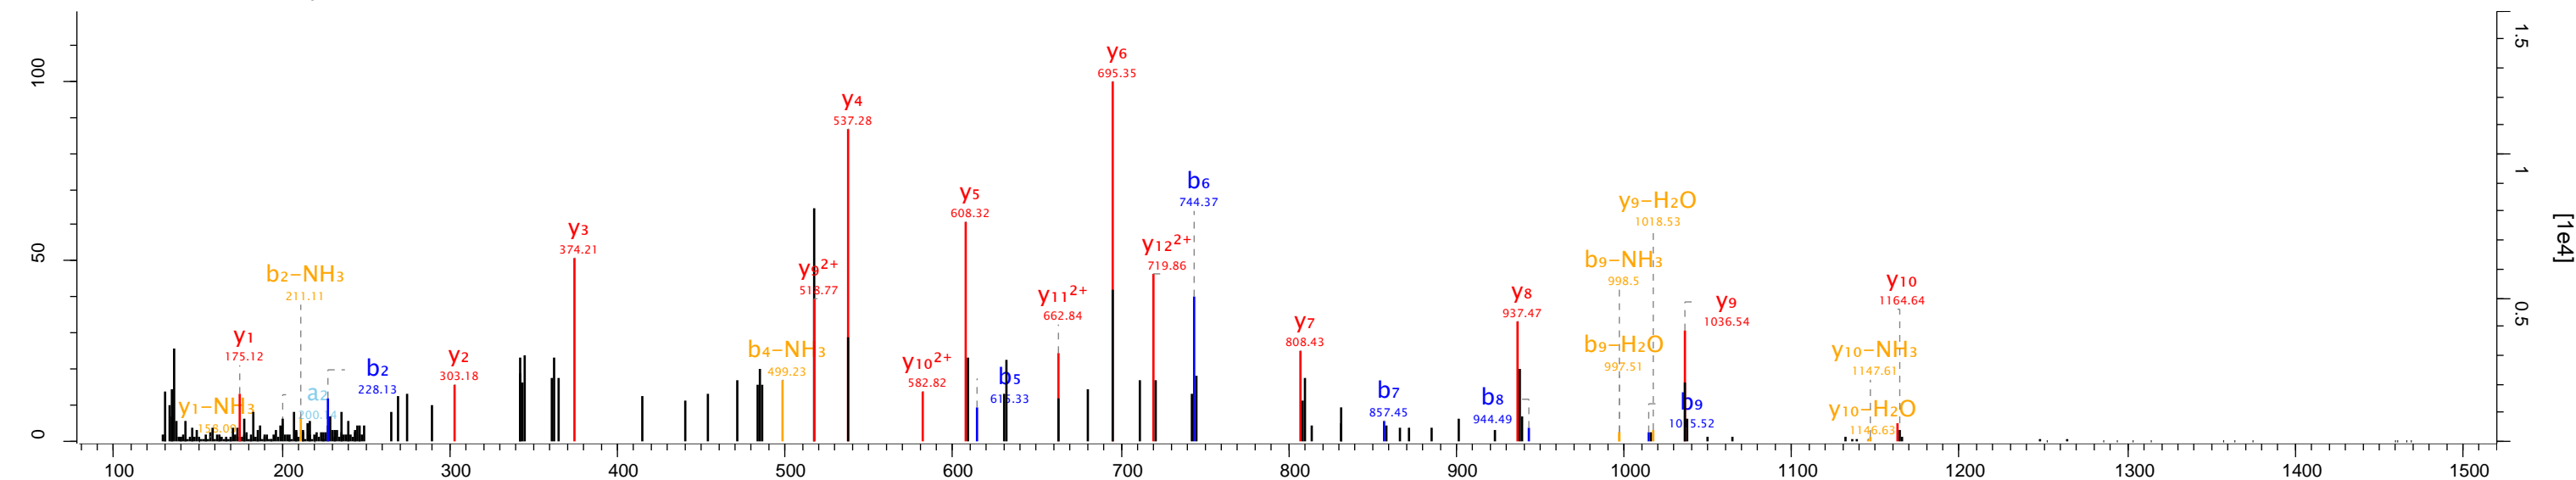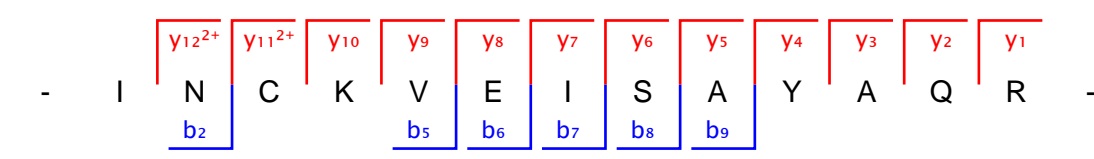

Spectral Annotation for Single-Peptide IDs in 16-cell Embryo using Q-OT-LIT

Raw file 2015-01-05\_CL02\_2Excl15sMaxInj70 Scan 10853 Method ITMS; HCD Score 53.96 m/z 845.76

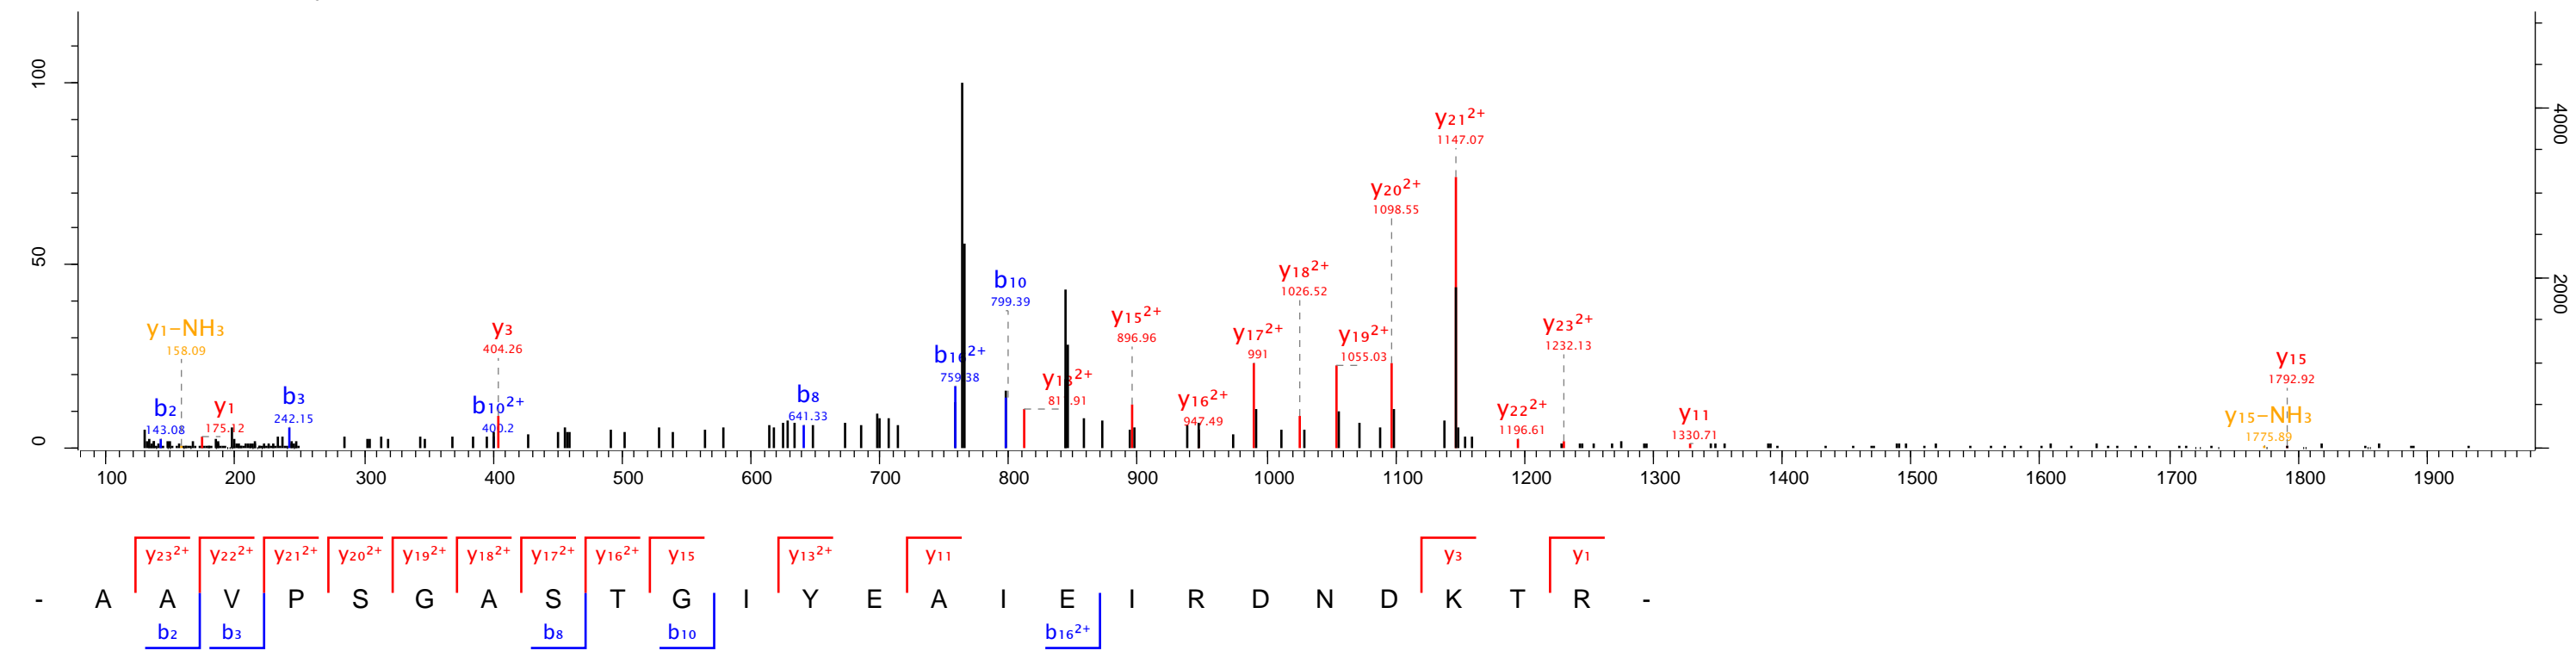

Spectral Annotation for Single-Peptide IDs in 16-cell Embryo using Q-OT-LIT

Raw file: 2015-01-05\_CL02\_2Excl15sMaxInj70  
 Scan: 10858 Method: ITMS; HCD Score: 74.65 m/z: 517.93

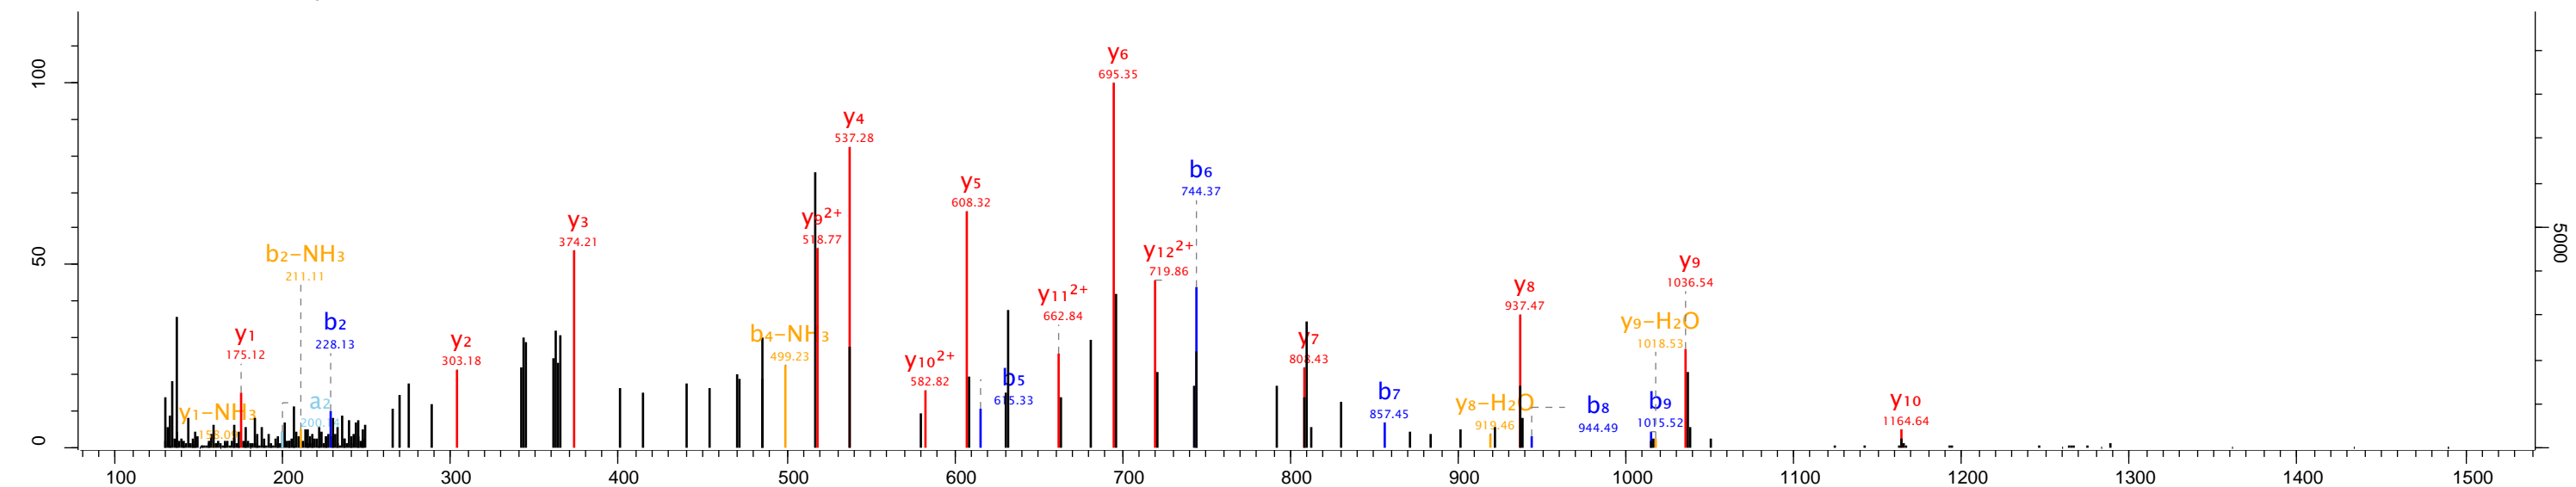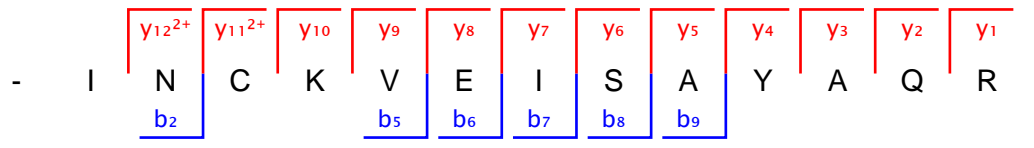

Raw file 2015-01-05\_CL02\_2Excl15sMaxInj70 Scan 10876 Method ITMS; HCD Score 127.78 m/z 496.94

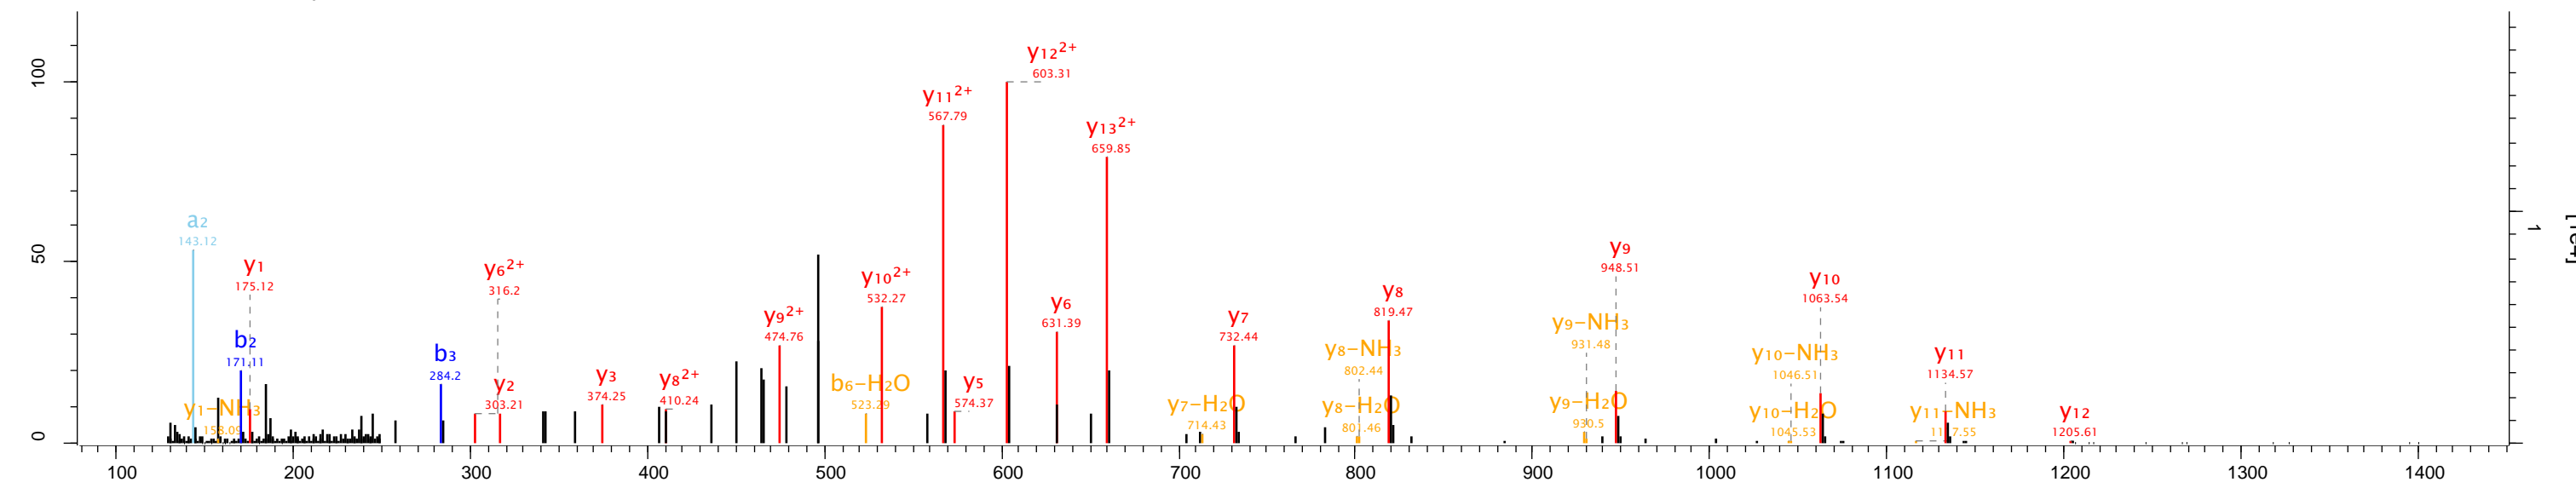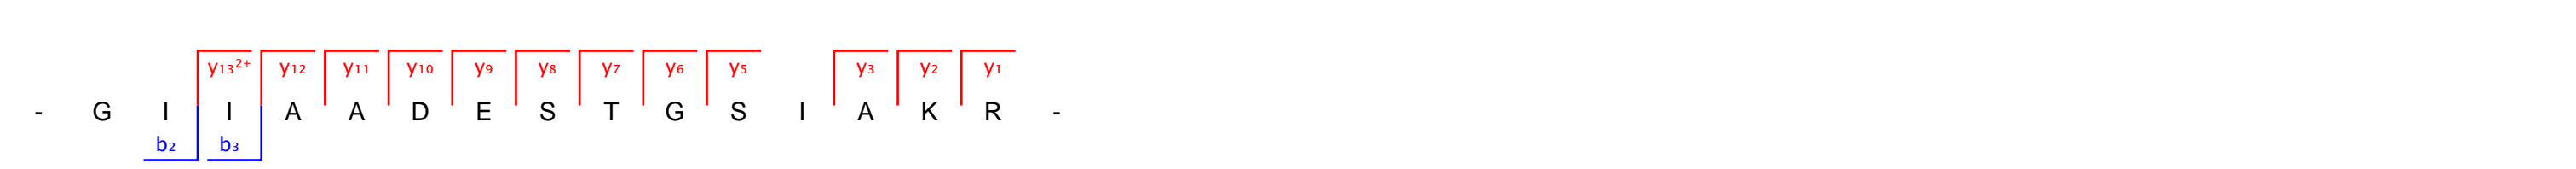

Raw file: 2015-01-05\_CL02\_2Excl15sMaxInj70  
 Scan: 10877 Method: ITMS; HCD Score: 74.78 m/z: 518.27

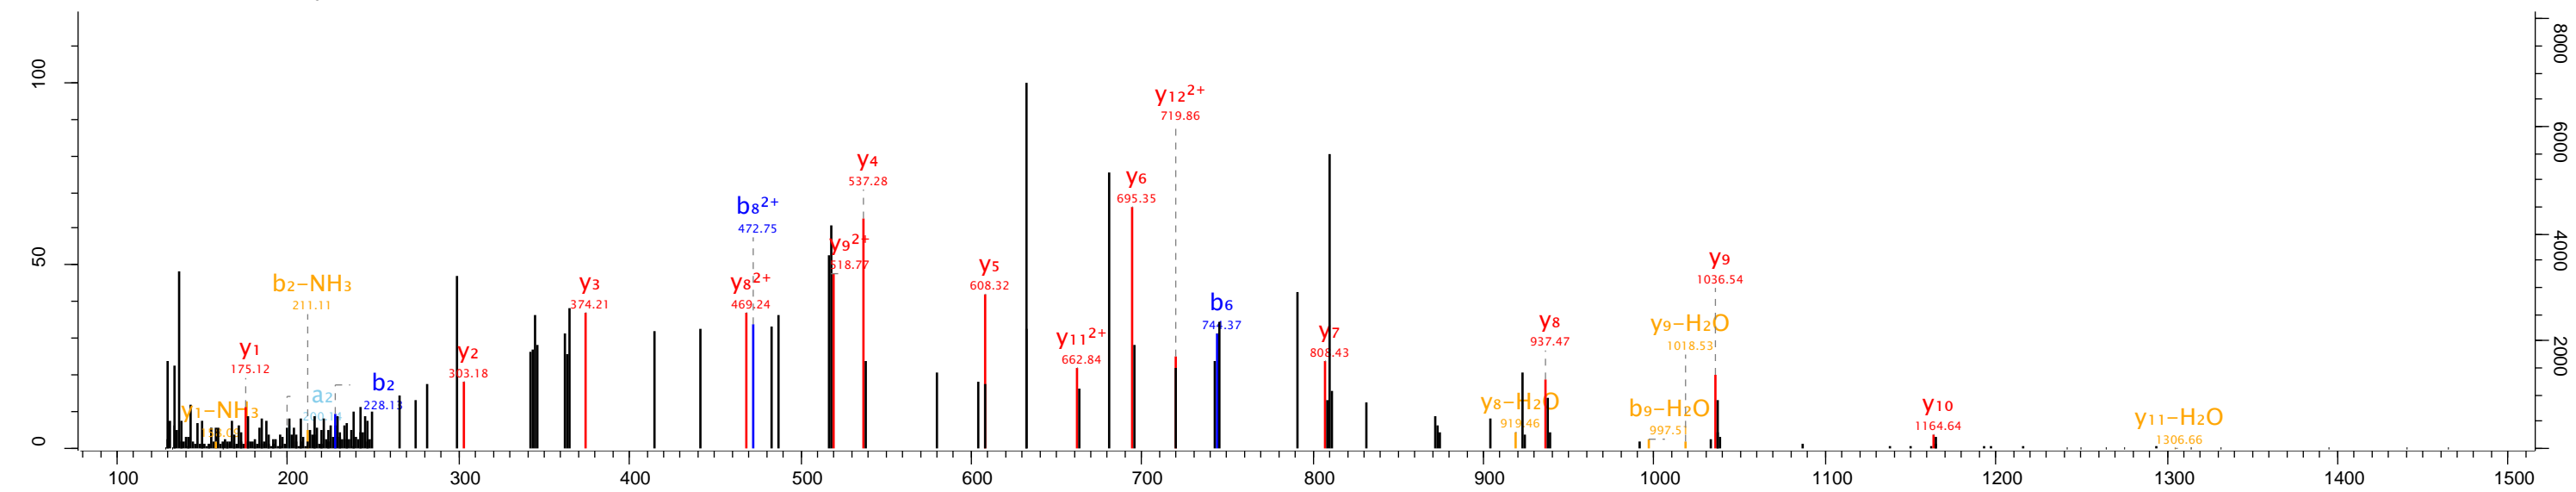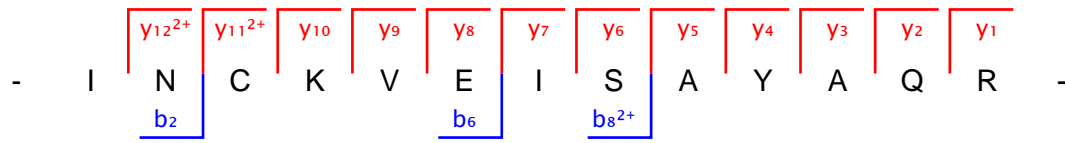

Spectral Annotation for Single-Peptide IDs in 16-cell Embryo using Q-OT-LIT

Raw file 2015-01-05\_CL02\_2Excl15sMaxInj70 Scan 10885 Method ITMS; HCD Score 92.65 m/z 744.9

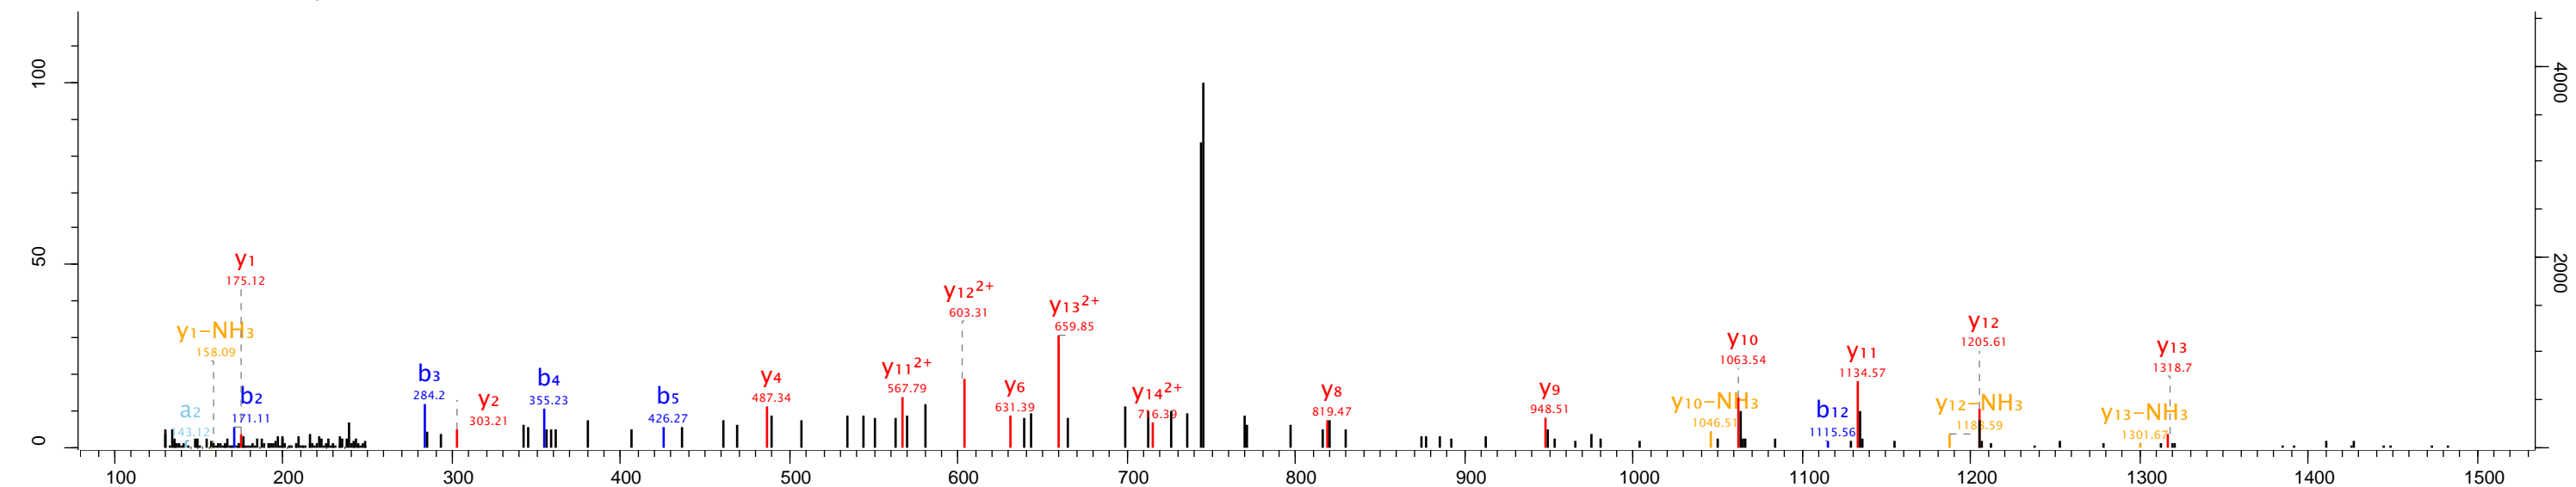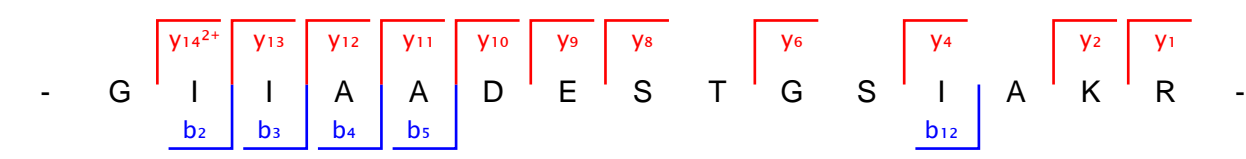



Raw file  
 2015-01-05\_CL02\_2Excl15sMaxInj70  
 Scan 10932 Method ITMS; HCD Score 66.99 m/z 815.44

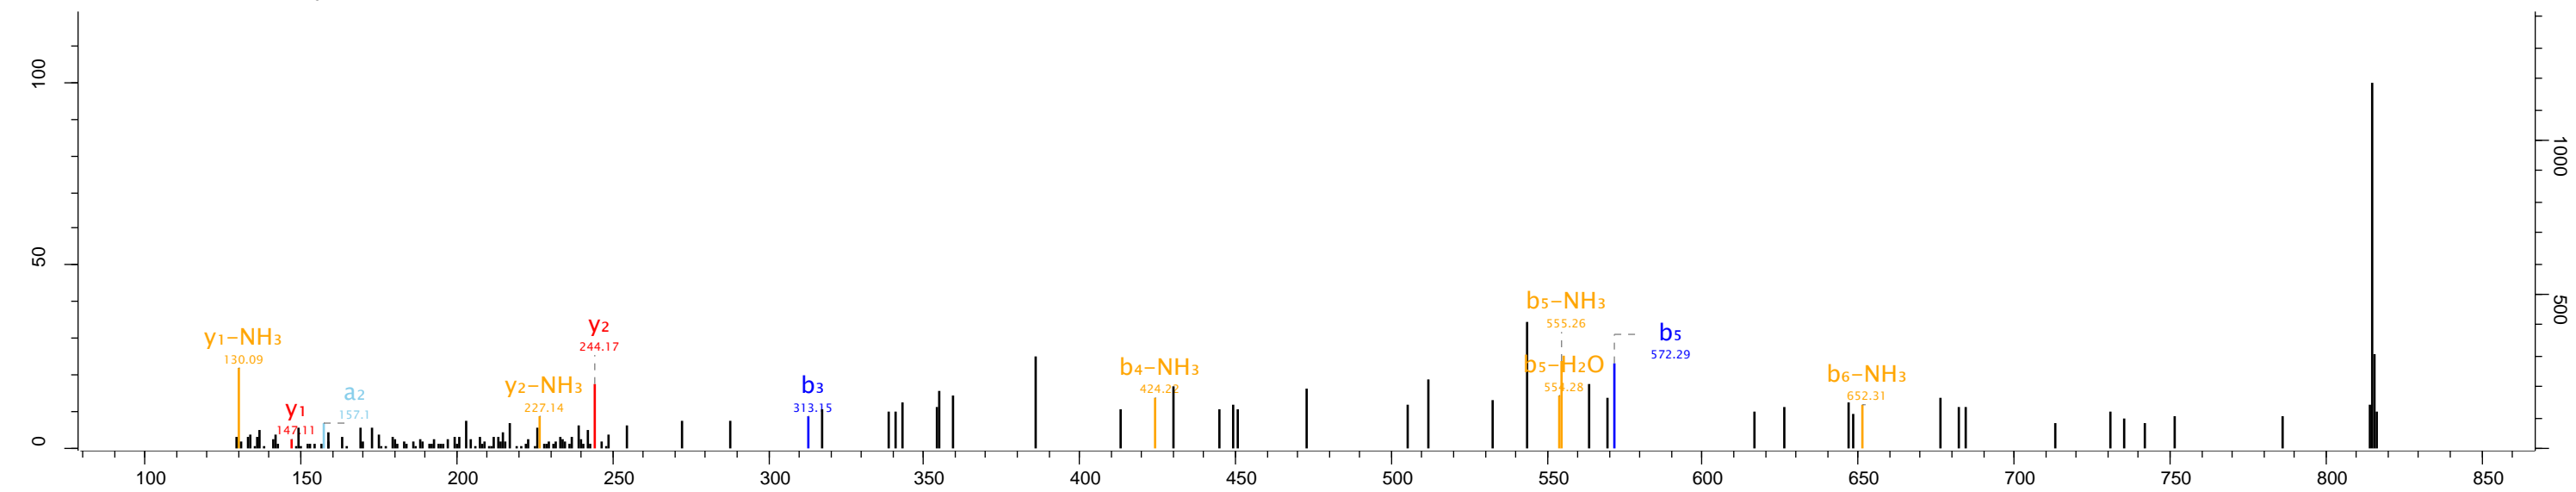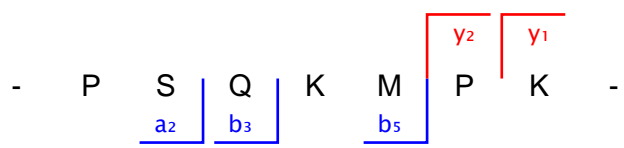

Raw file: 2015-01-05\_CL02\_2Excl15sMaxInj70  
 Scan: 10981 Method: ITMS; HCD Score: 49.66 m/z: 592.29

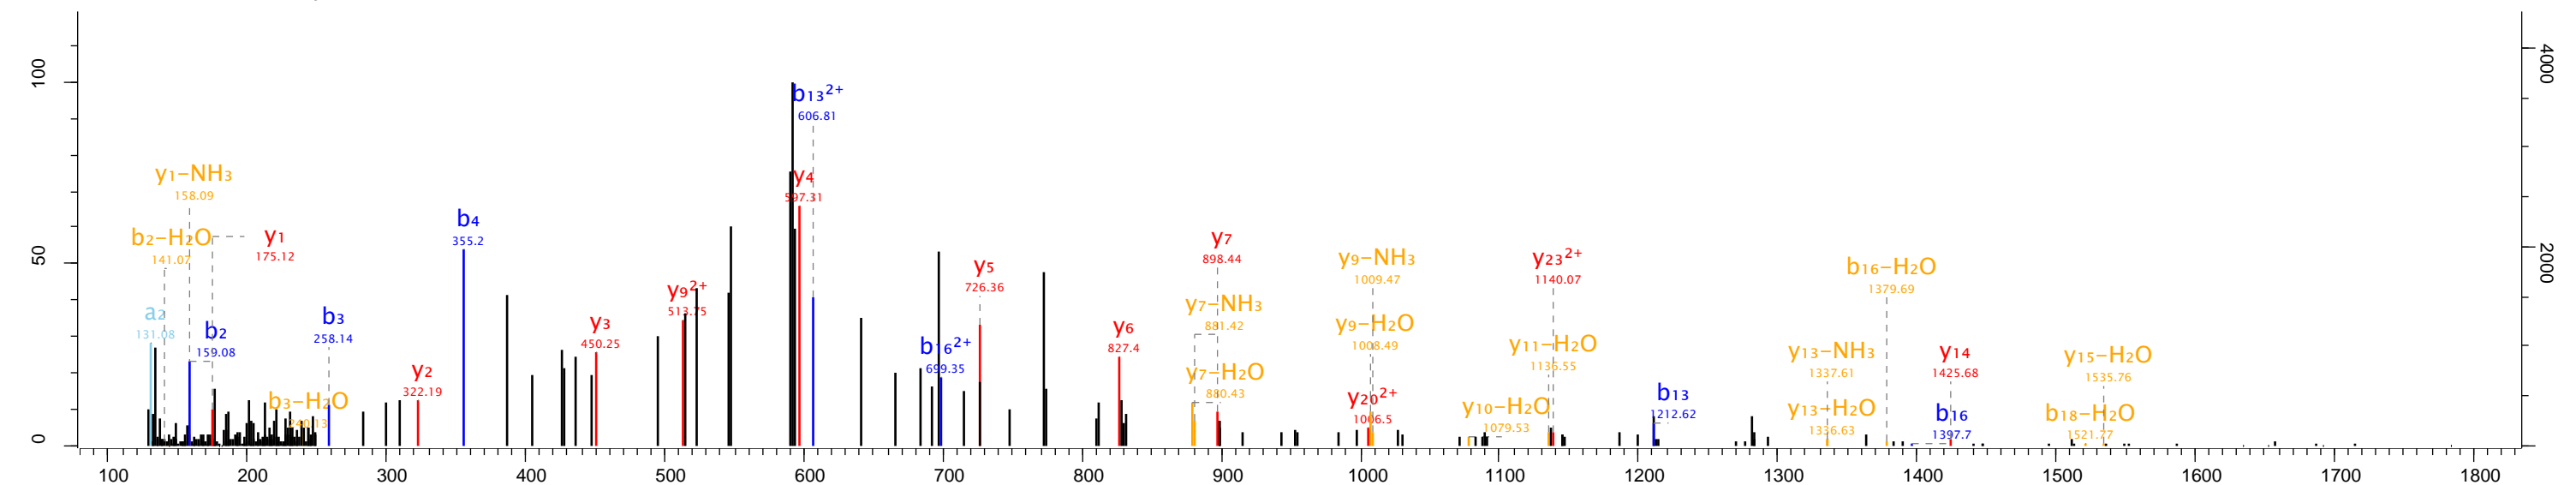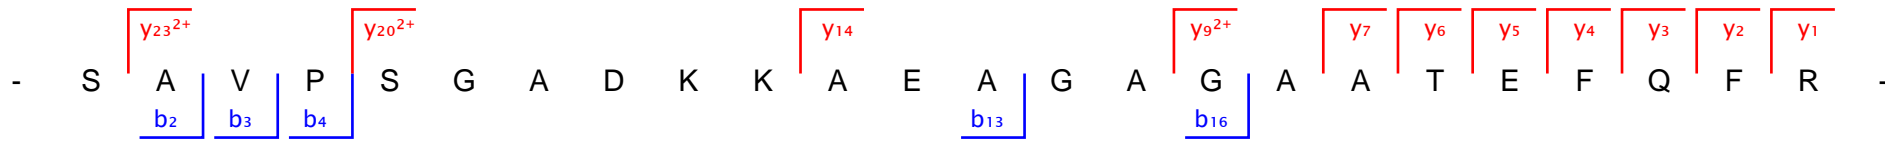

Spectral Annotation for Single-Peptide IDs in 16-cell Embryo using Q-OT-LIT

Raw file: 2015-01-05\_CL02\_2Excl15sMaxInj70  
 Scan: 11276 Method: ITMS; HCD Score: 98.25 m/z: 517.26

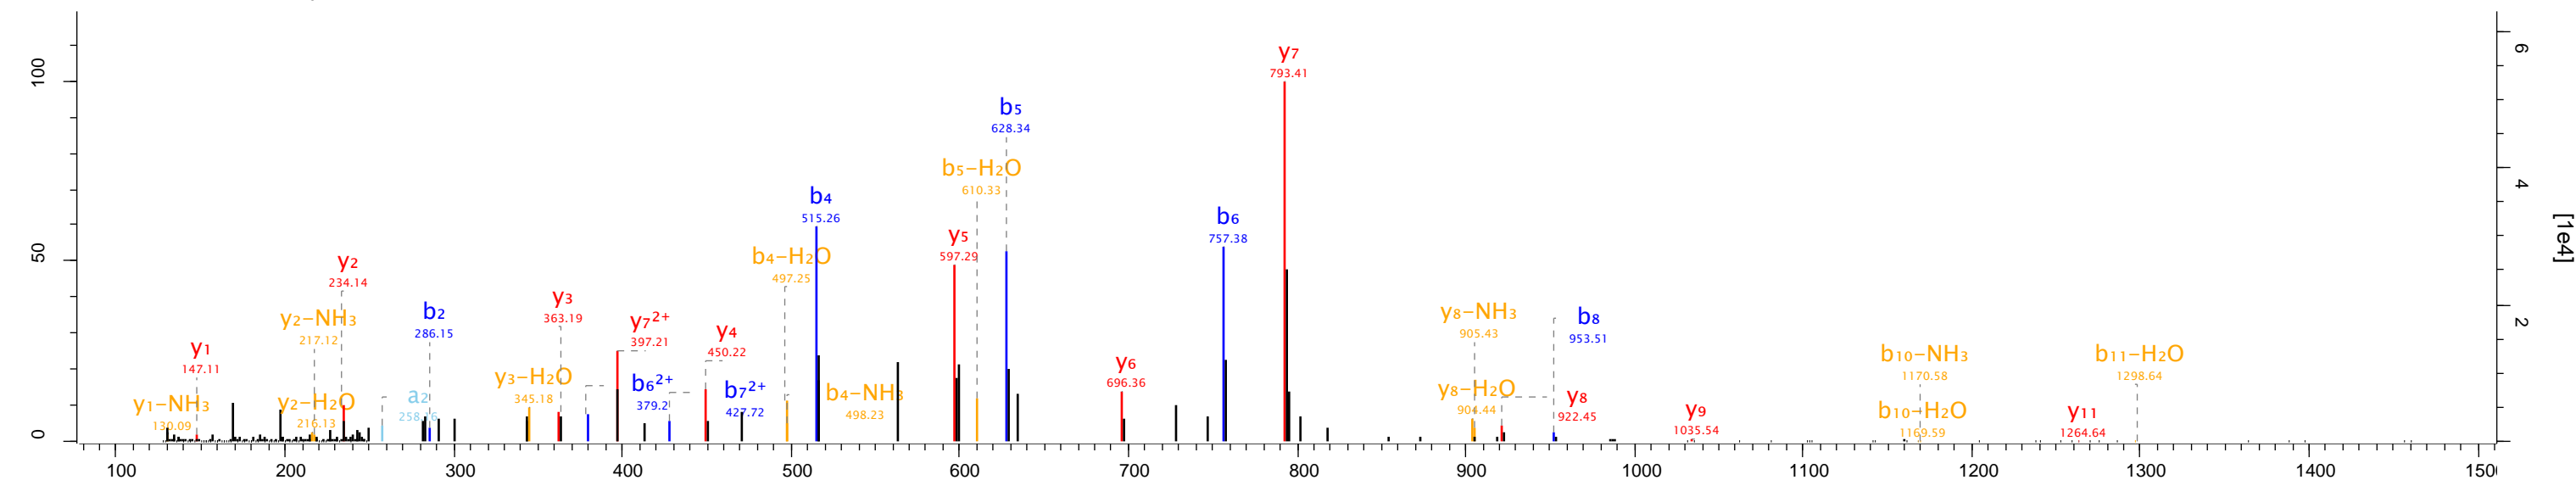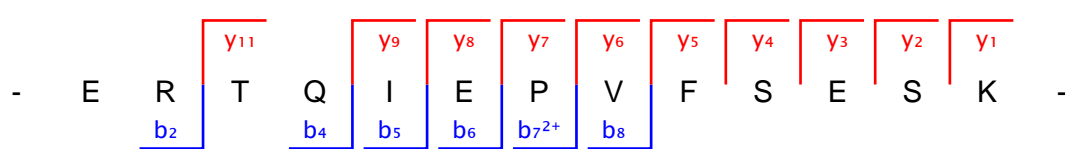

Spectral Annotation for Single-Peptide IDs in 16-cell Embryo using Q-OT-LIT

Raw file: 2015-01-05\_CL02\_2Excl15sMaxInj70  
 Scan: 11320 Method: ITMS; HCD Score: 149.32 m/z: 775.39

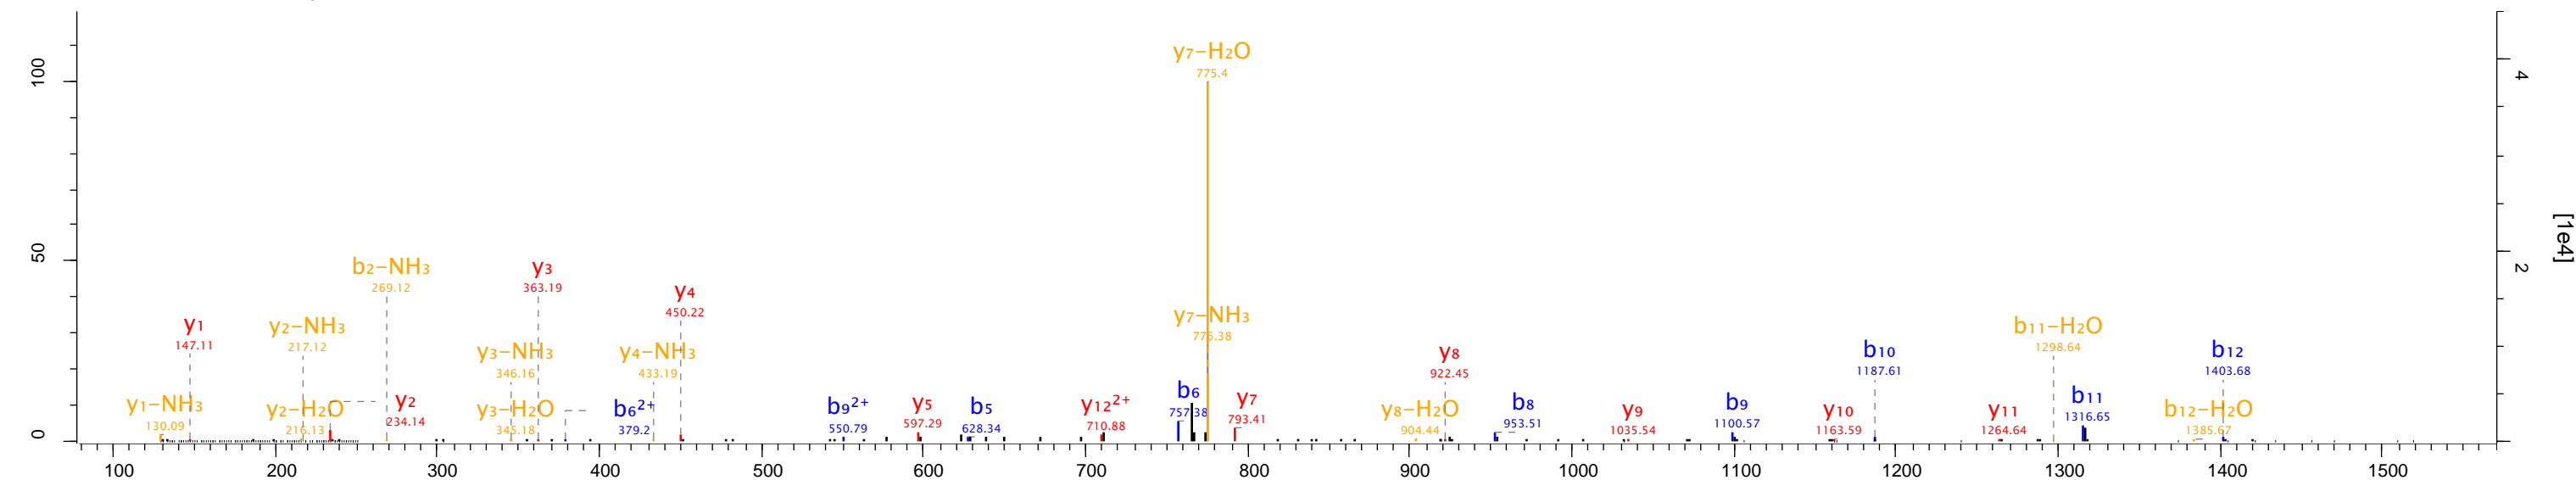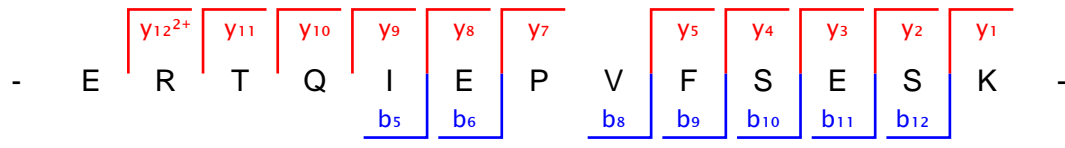

Spectral Annotation for Single-Peptide IDs in 16-cell Embryo using Q-OT-LIT

Raw file 2015-01-05\_CL02\_2Excl15sMaxInj70 Scan 11571 Method ITMS; HCD Score 140.09 m/z 401.24

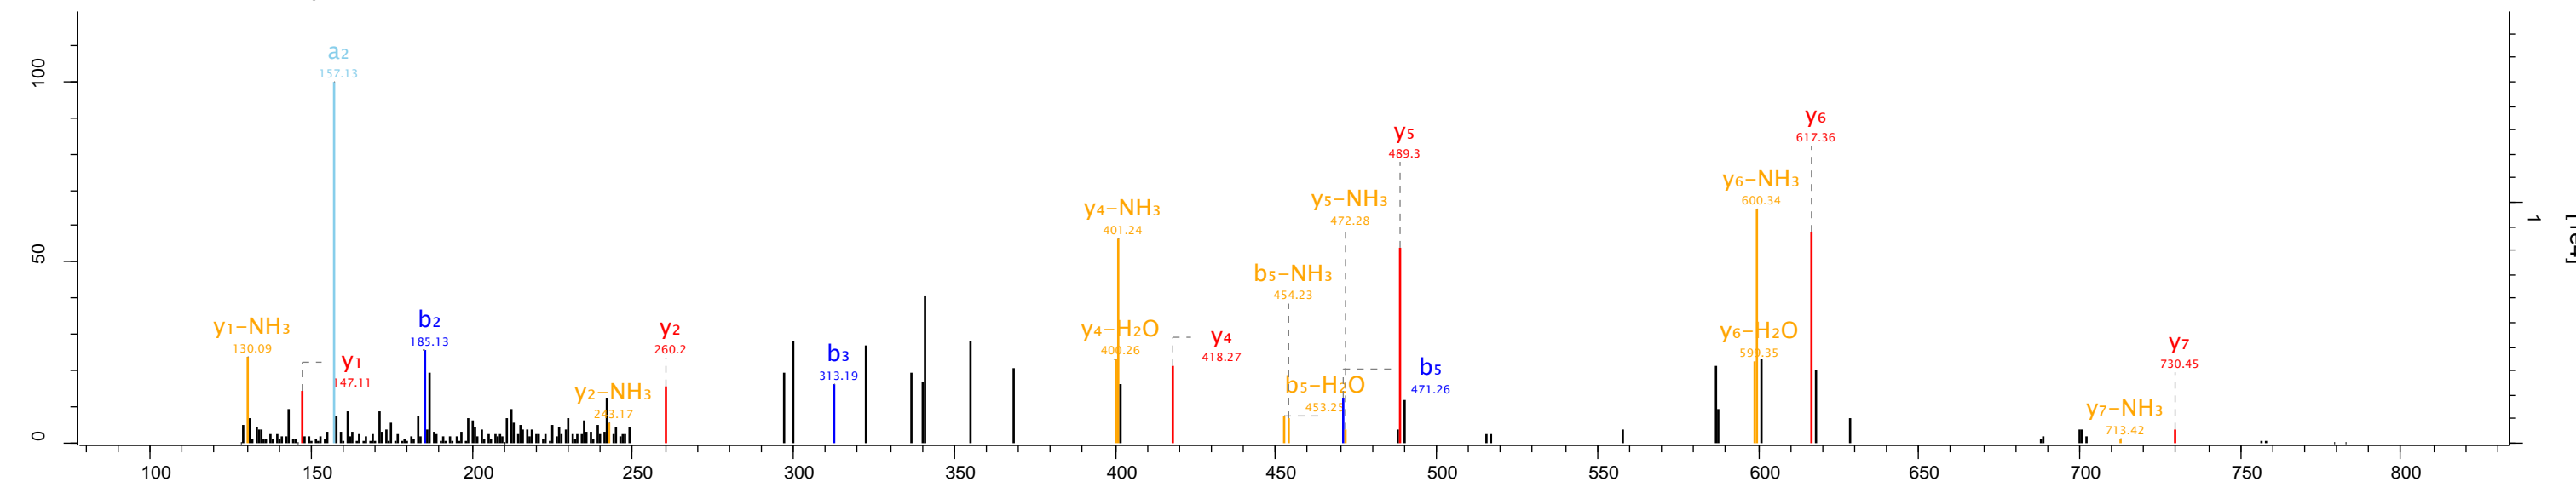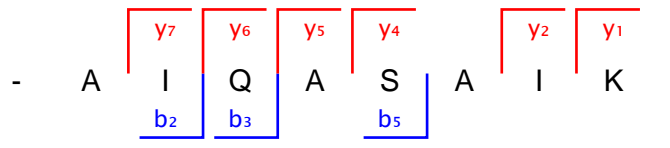

Raw file 2015-01-05\_CL02\_2Excl15sMaxInj70 Scan 11591 Method ITMS; HCD Score 113.71 m/z 401.24

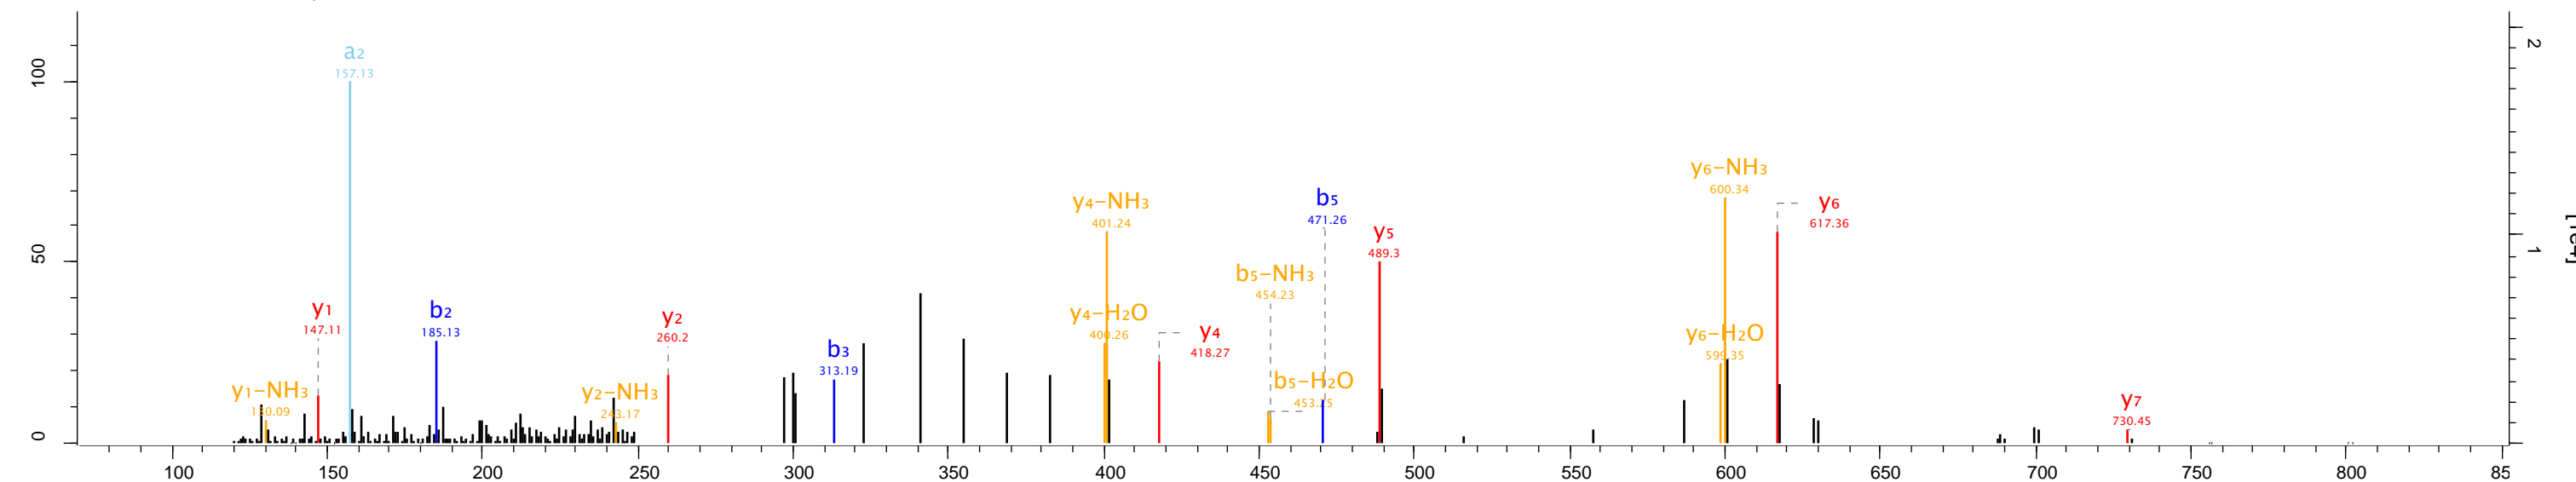

Raw file  
 2015-01-05\_CL02\_2Excl15sMaxInj70  
 Scan 11874 Method ITMS; HCD Score 62.29 m/z 554.31

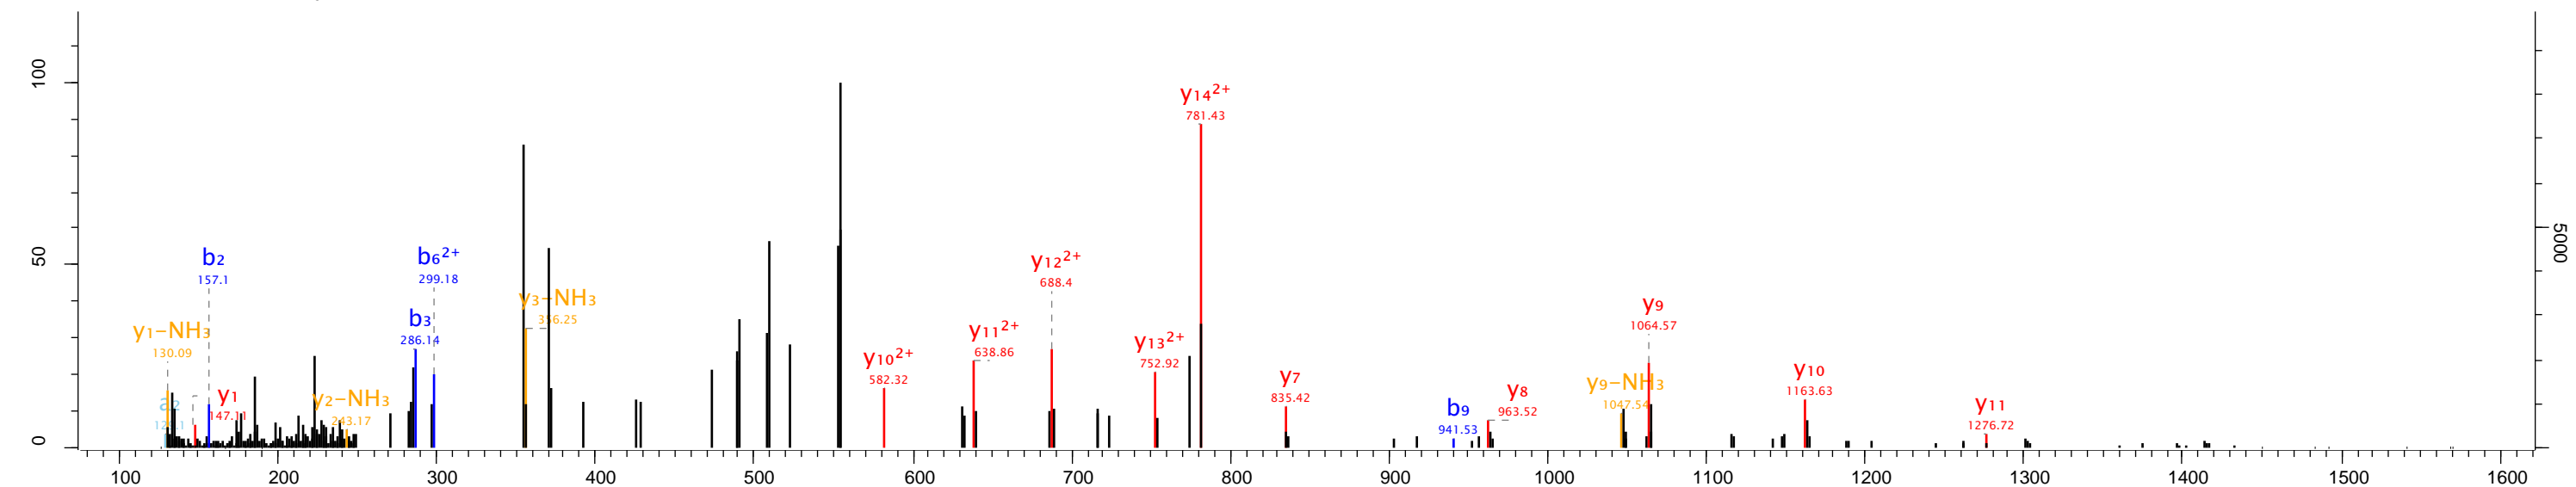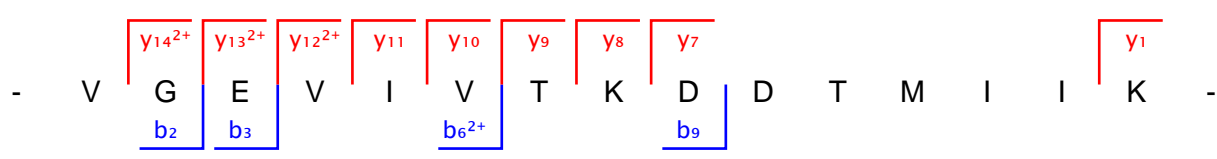

Raw file  
 2015-01-05\_CL02\_2Excl15sMaxInj70  
 Scan 11906 Method ITMS; HCD Score 75.76 m/z 554.31

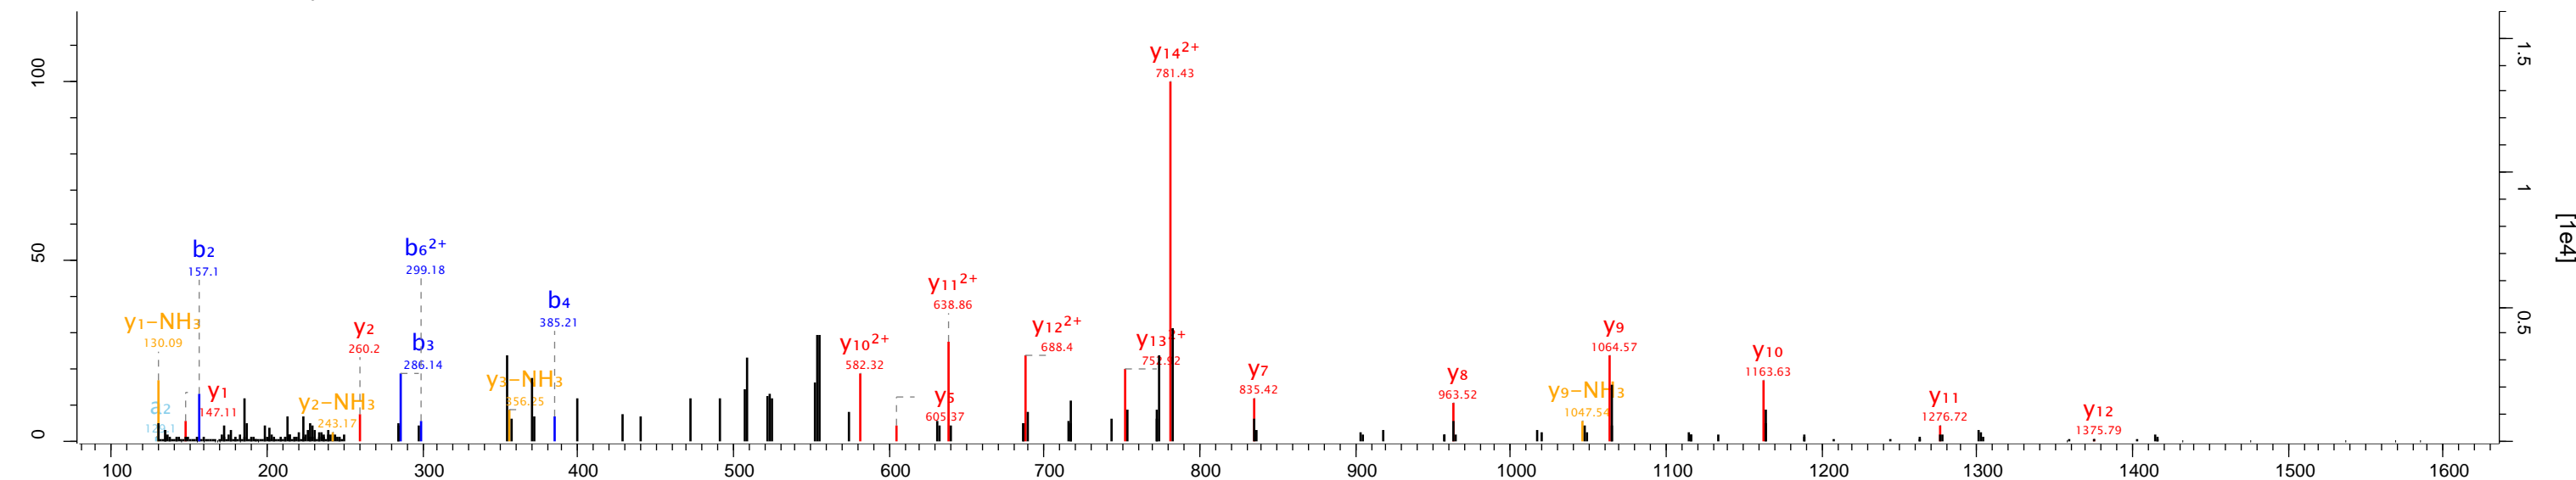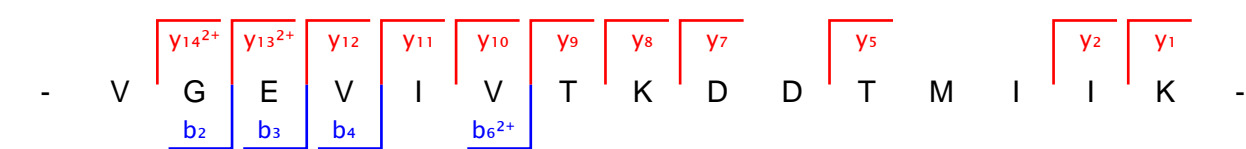



Raw file 2015-01-05\_CL02\_2Excl15sMaxInj70 Scan 11922 Method ITMS; HCD Score 67.14 m/z 554.31

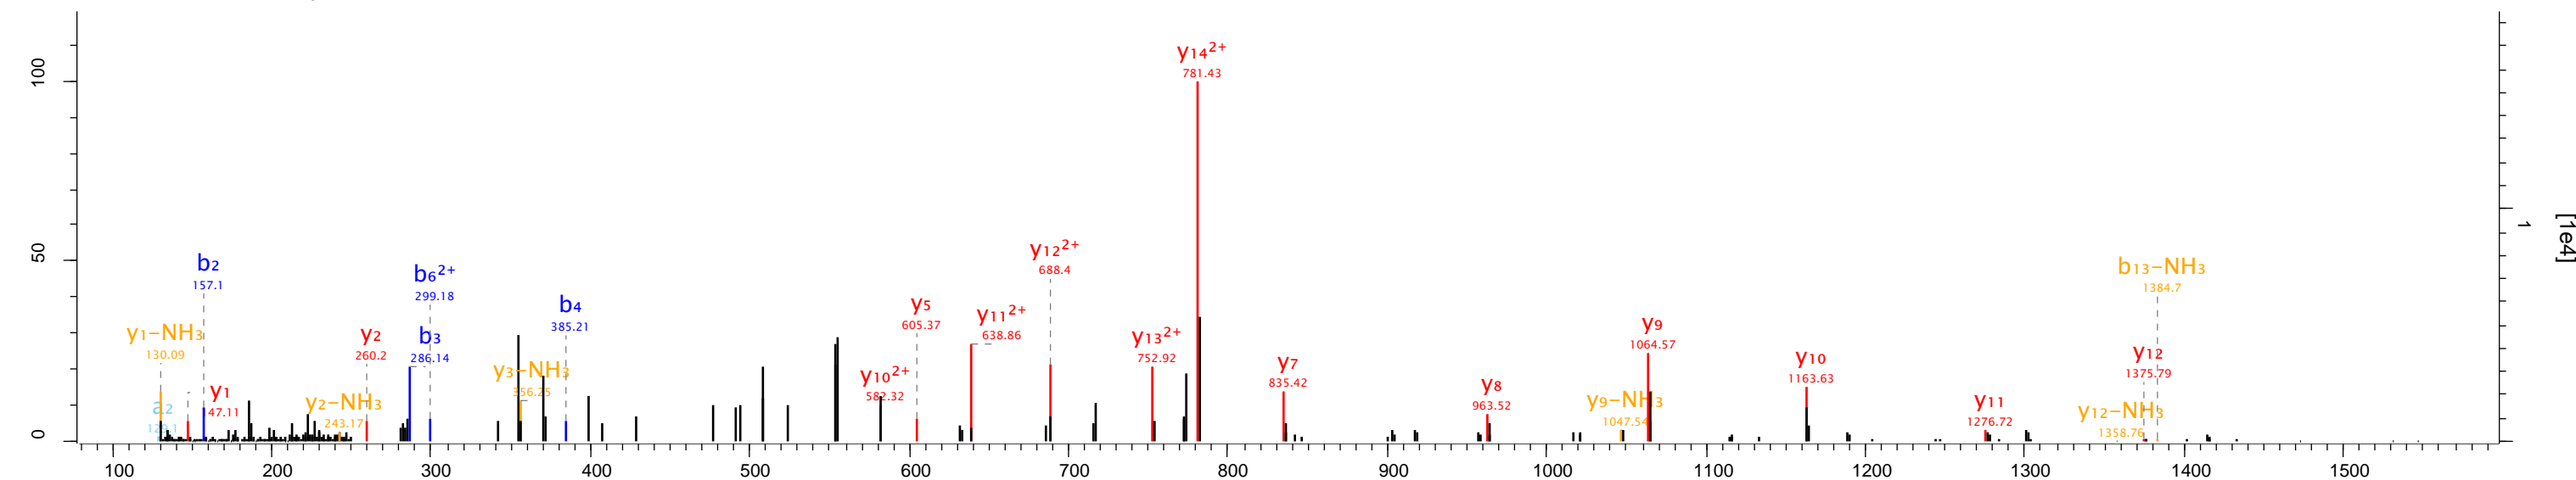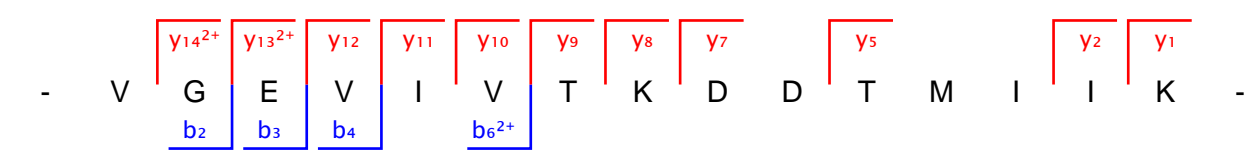

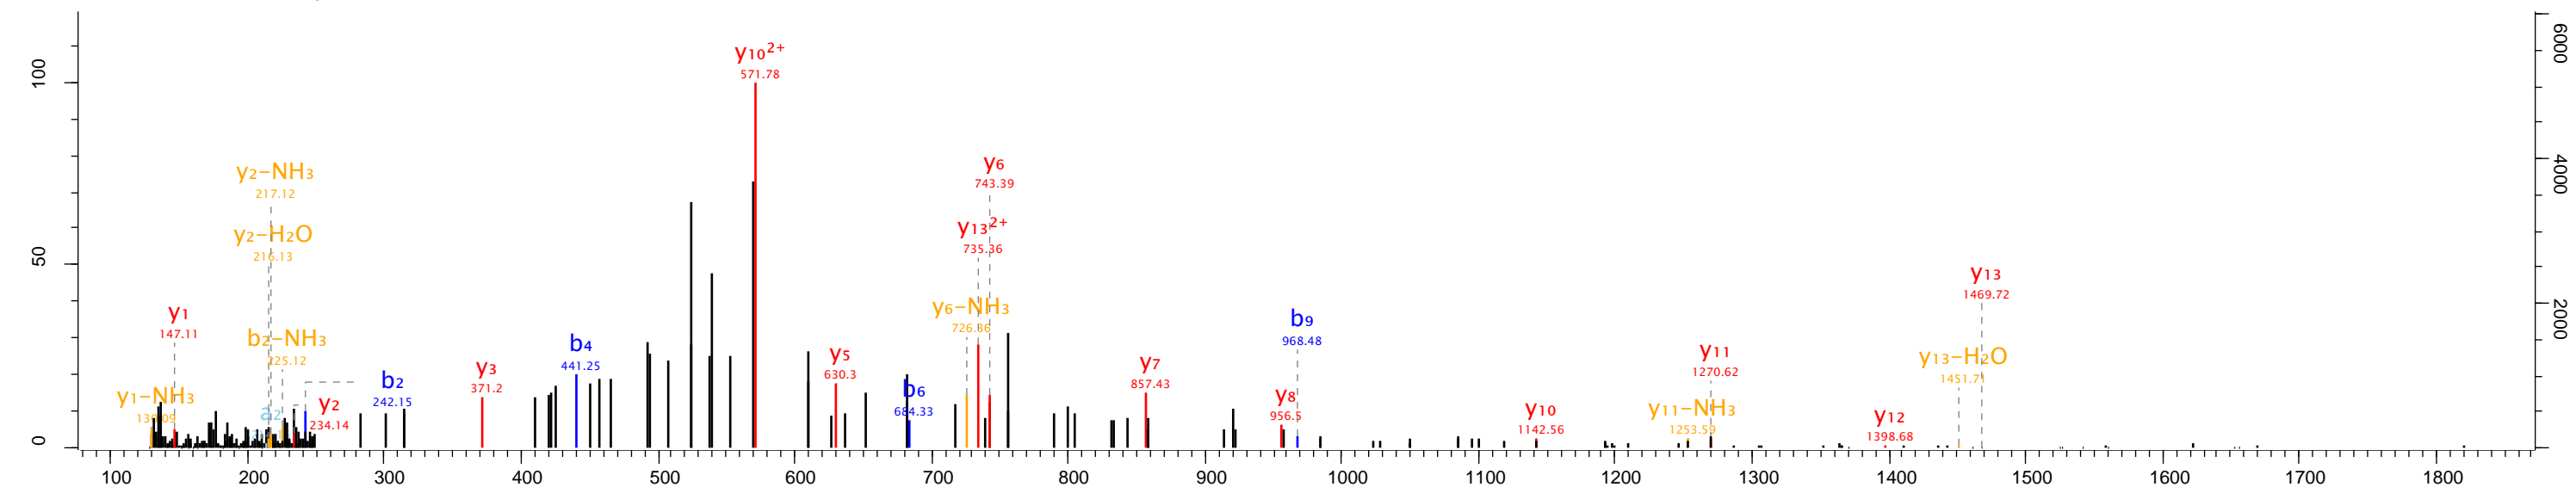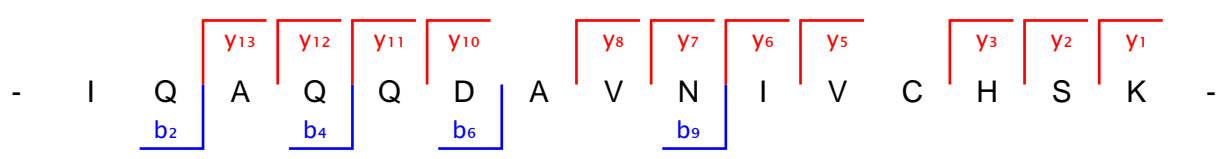

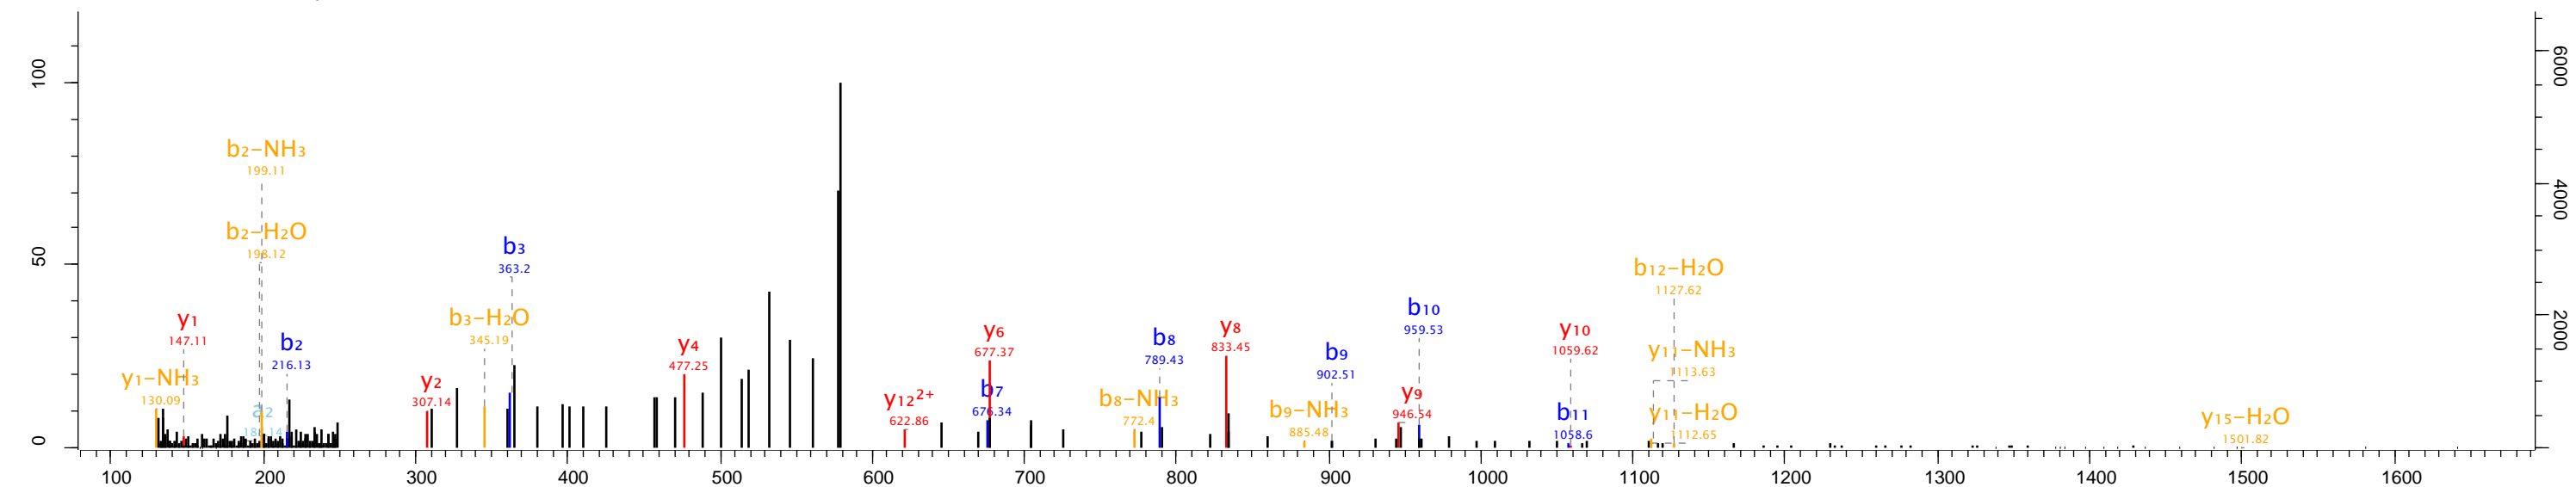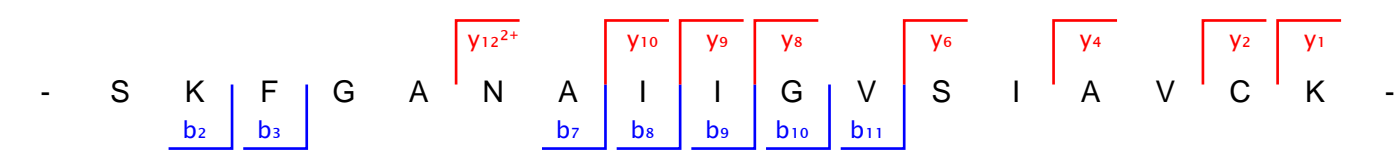

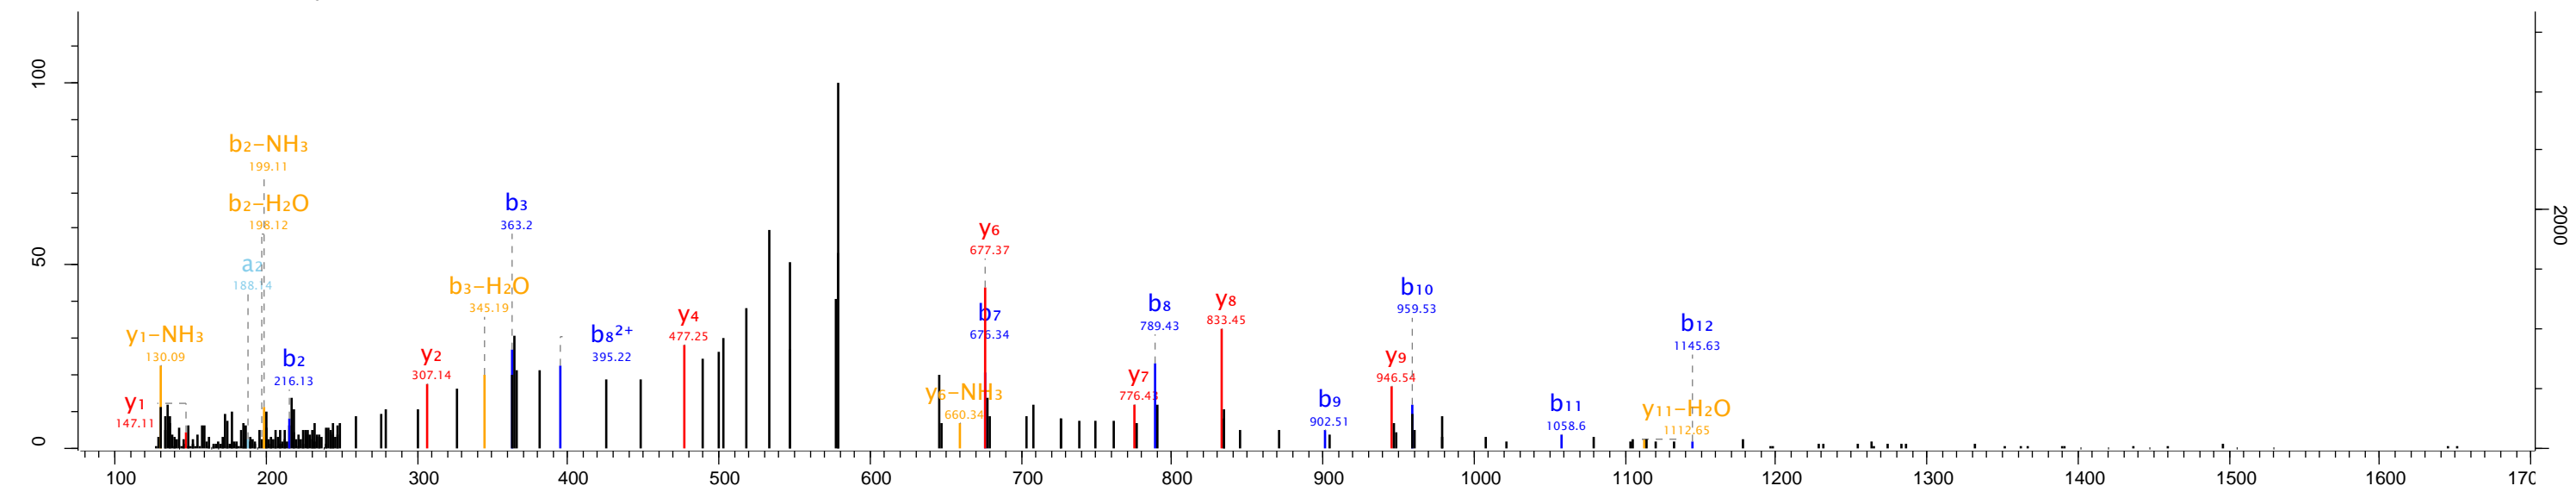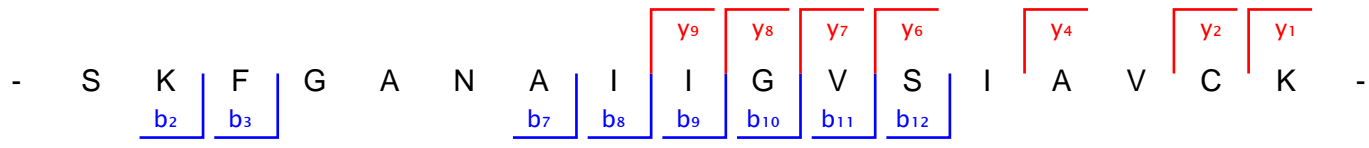

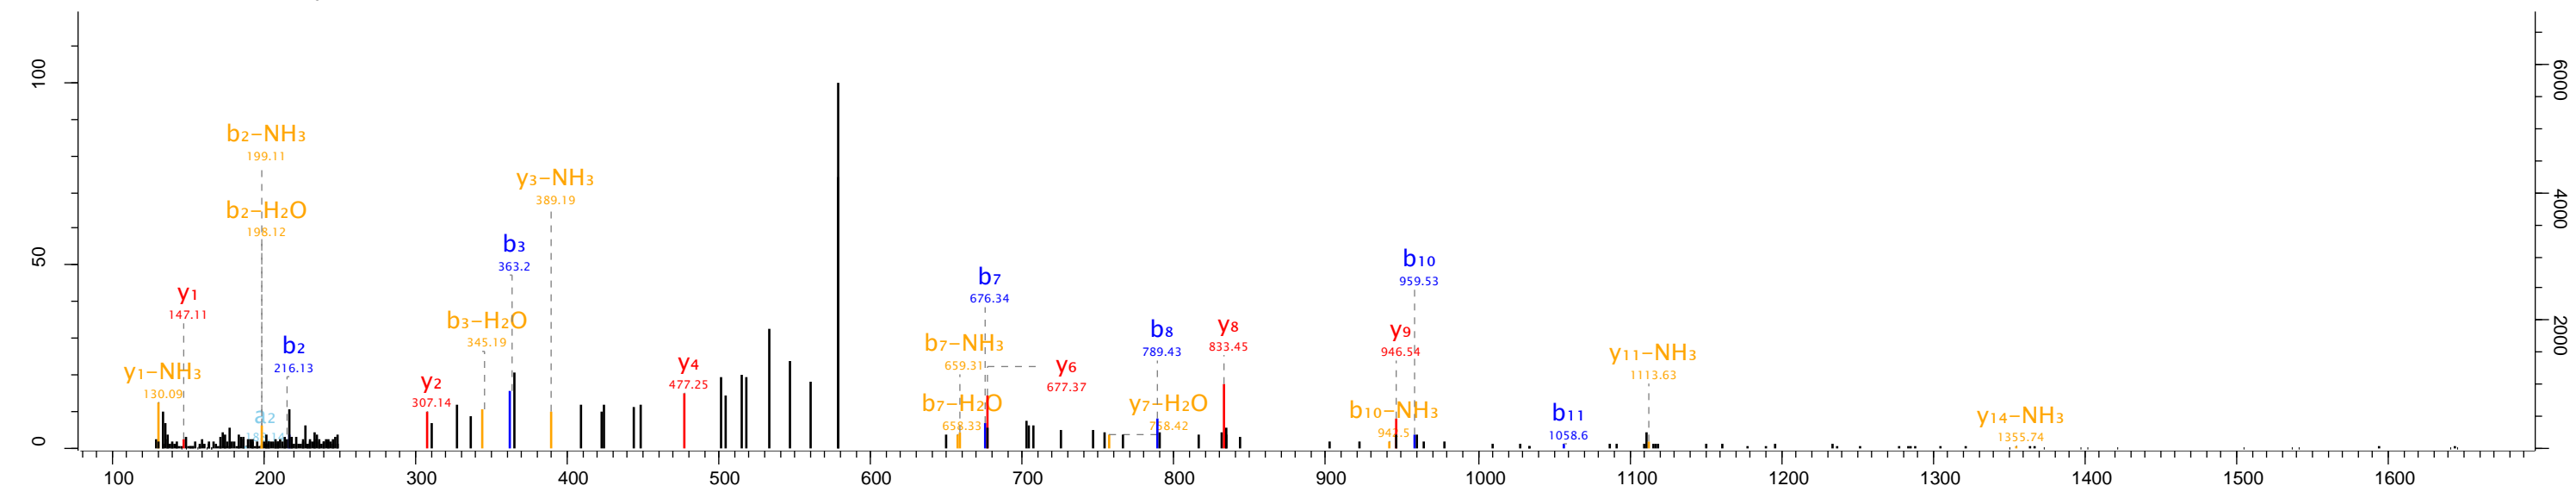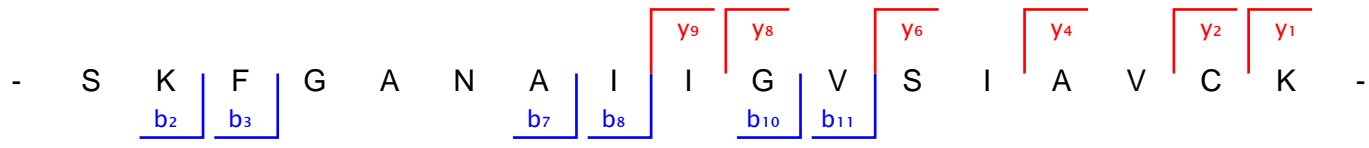

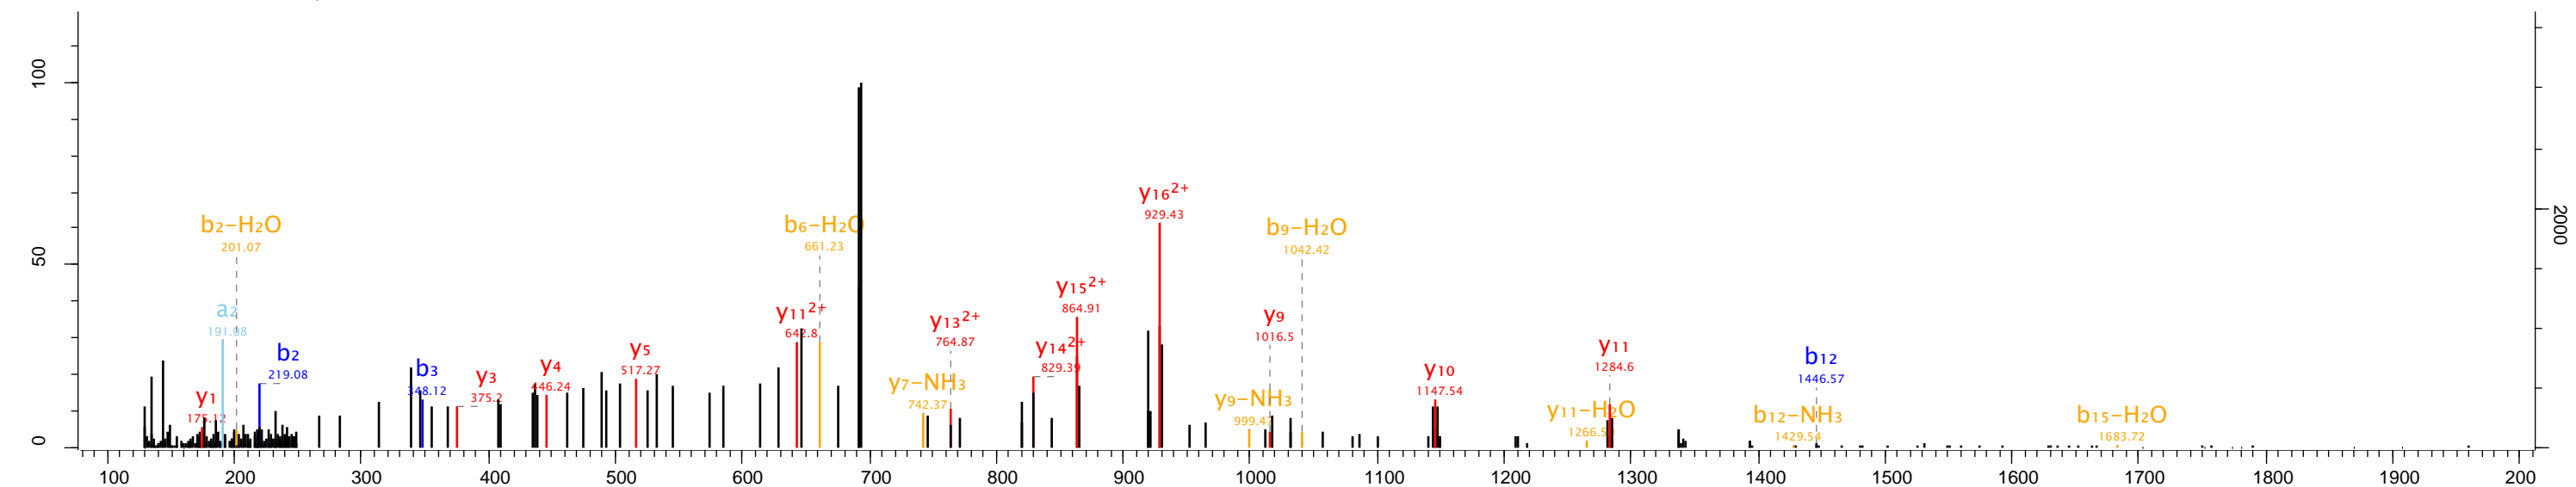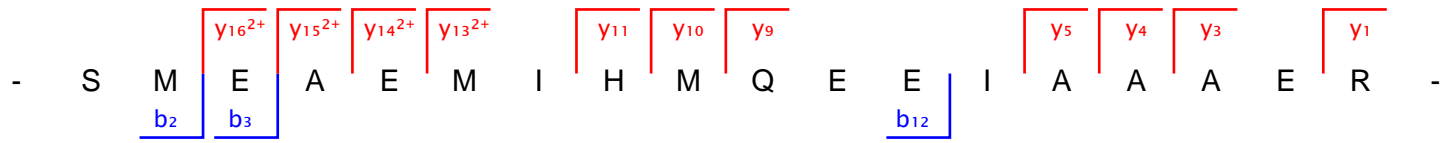

Raw file 2015-01-05\_CL02\_2Excl15sMaxInj70 Scan 12419 Method ITMS; HCD Score 66.57 m/z 642.3

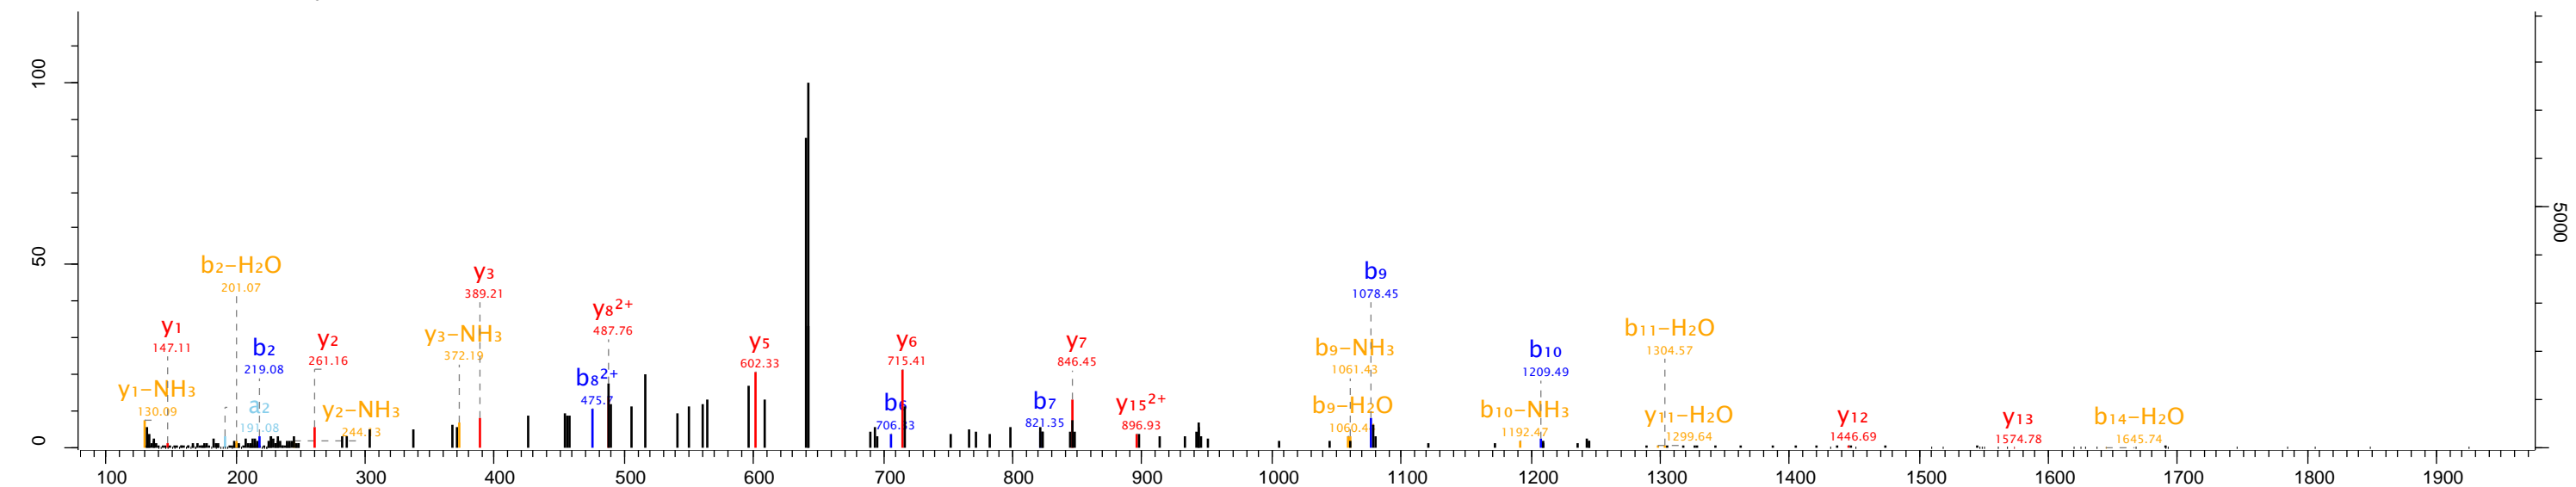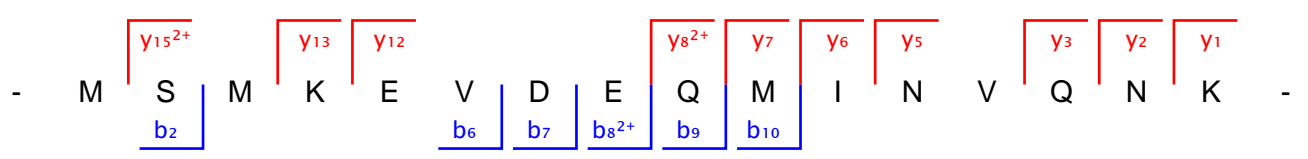

Spectral Annotation for Single-Peptide IDs in 16-cell Embryo using Q-OT-LIT

Raw file: 2015-01-05\_CL02\_2Excl15sMaxInj70  
 Scan: 12615 Method: ITMS; HCD Score: 42.95 m/z: 657.68

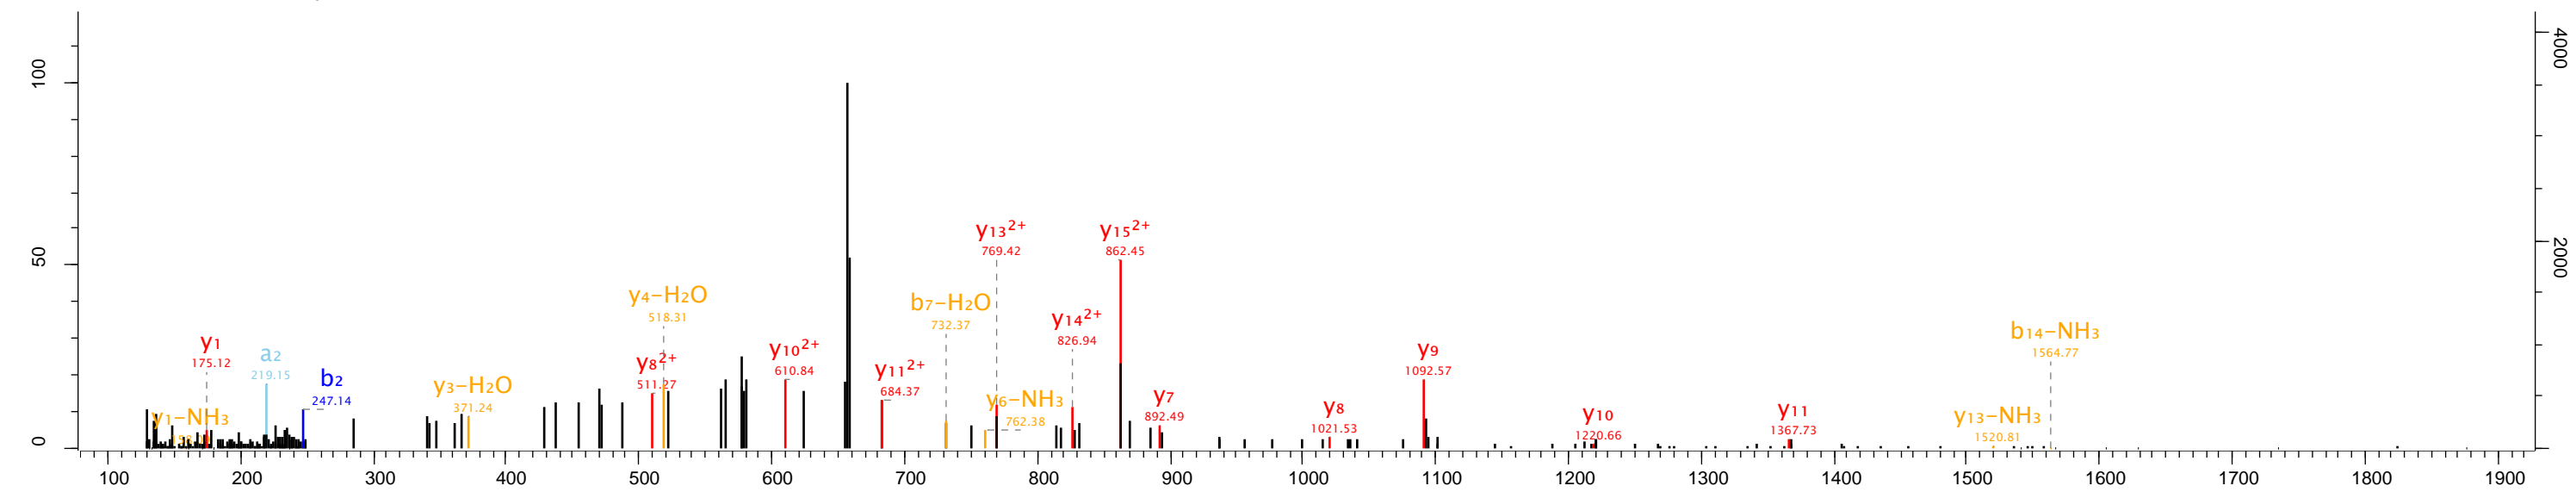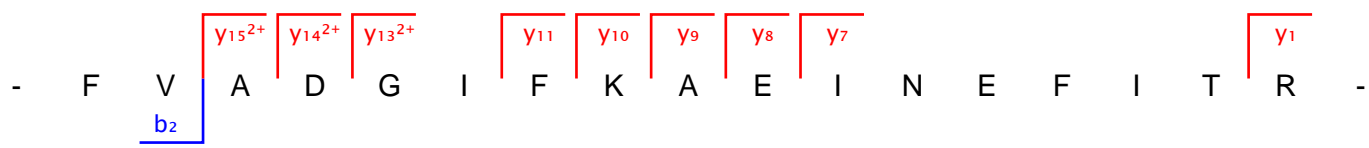

Spectral Annotation for Single-Peptide IDs in 16-cell Embryo using Q-OT-LIT



Raw file 2015-01-05\_CL02\_2Excl15sMaxInj70 Scan 12656 Method ITMS; HCD Score 74.43 m/z 590.67

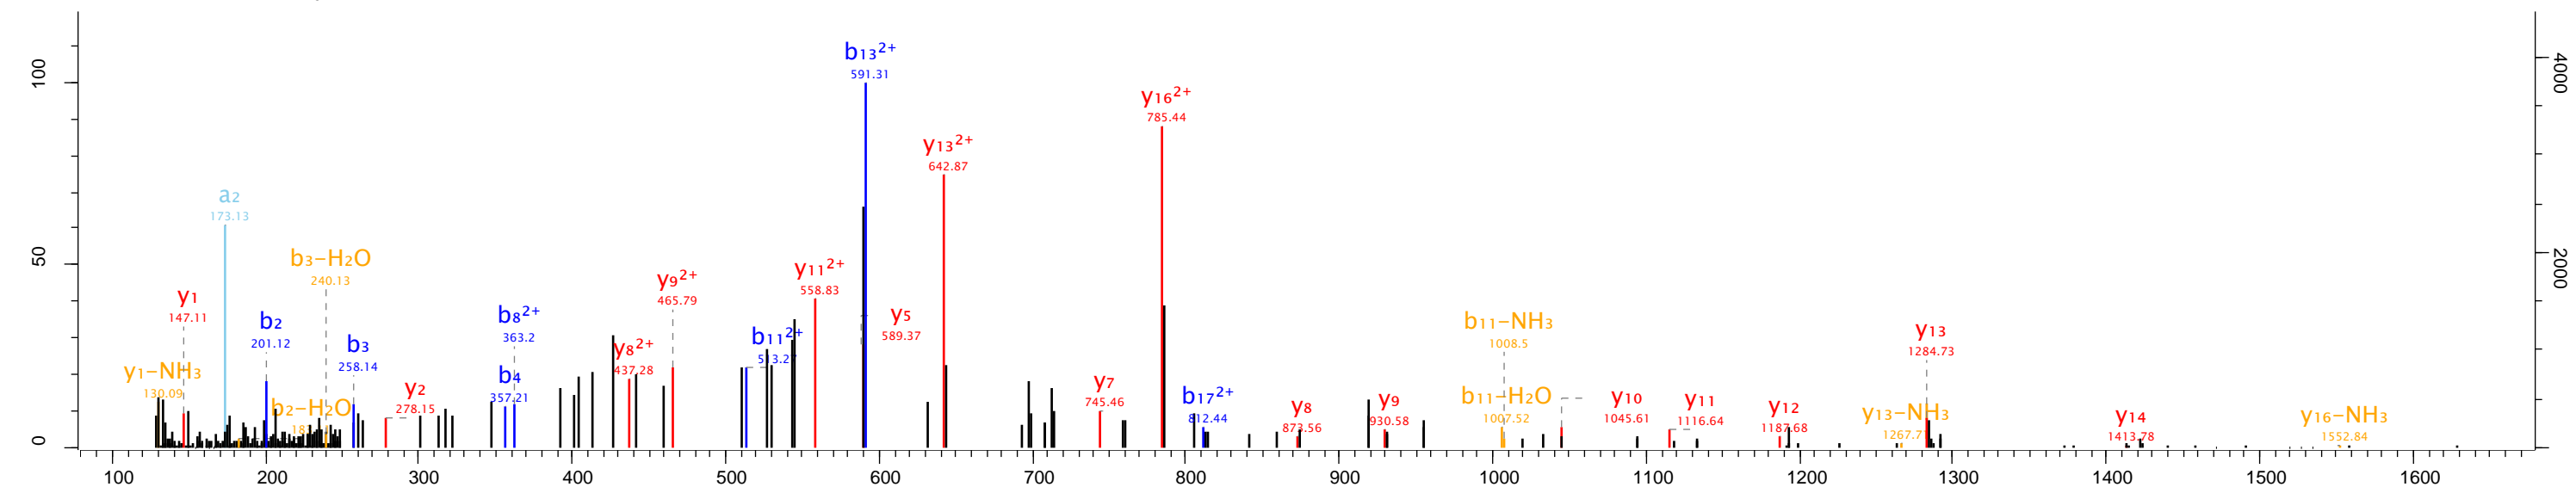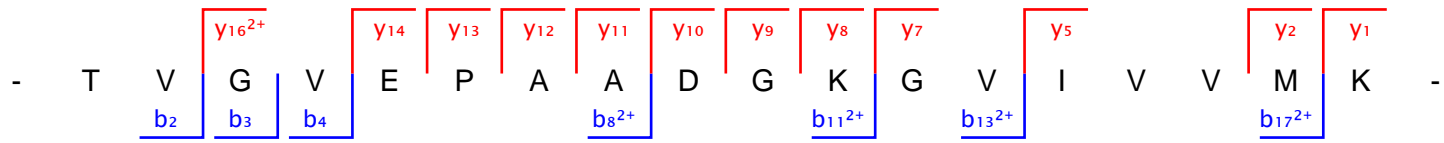

Spectral Annotation for Single-Peptide IDs in 16-cell Embryo using Q-OT-LIT

Raw file  
 2015-01-05\_CL02\_2Excl15sMaxInj70  
 Scan 12671 Method ITMS; HCD Score 84.51 m/z 591

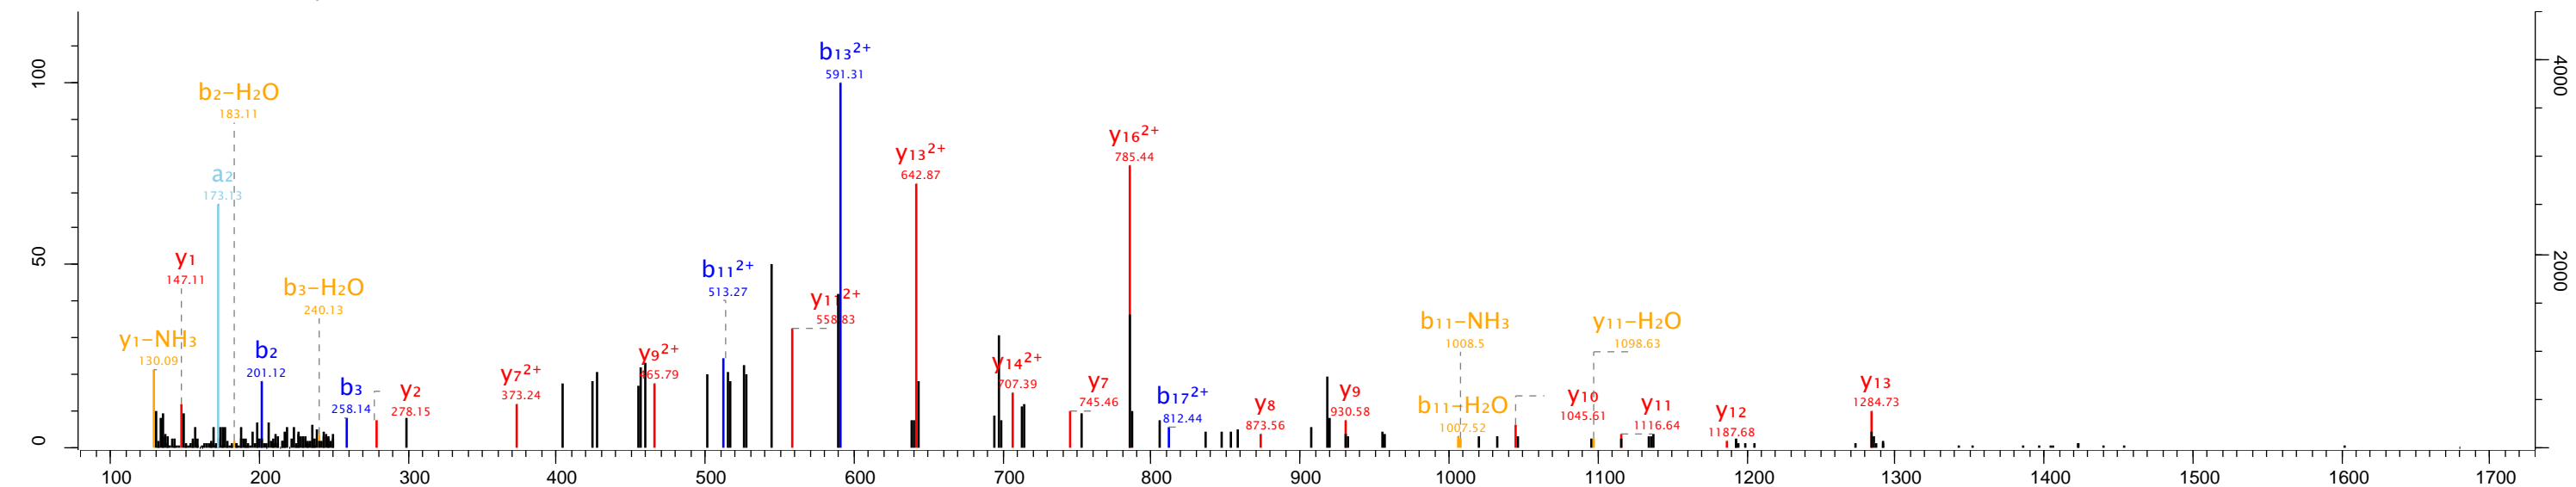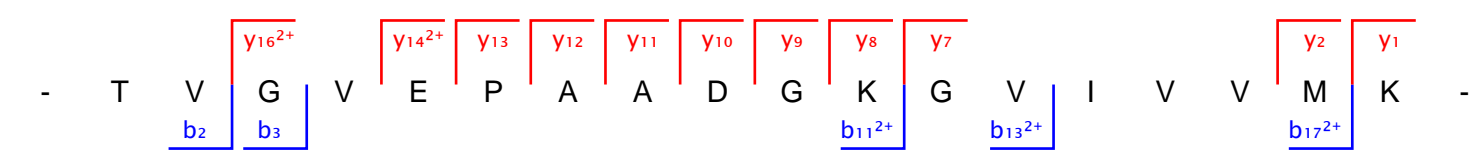

Spectral Annotation for Single-Peptide IDs in 16-cell Embryo using Q-OT-LIT

Raw file 2015-01-05\_CL02\_2Excl15sMaxInj70 Scan 12713 Method ITMS; HCD Score 46.32 m/z 591

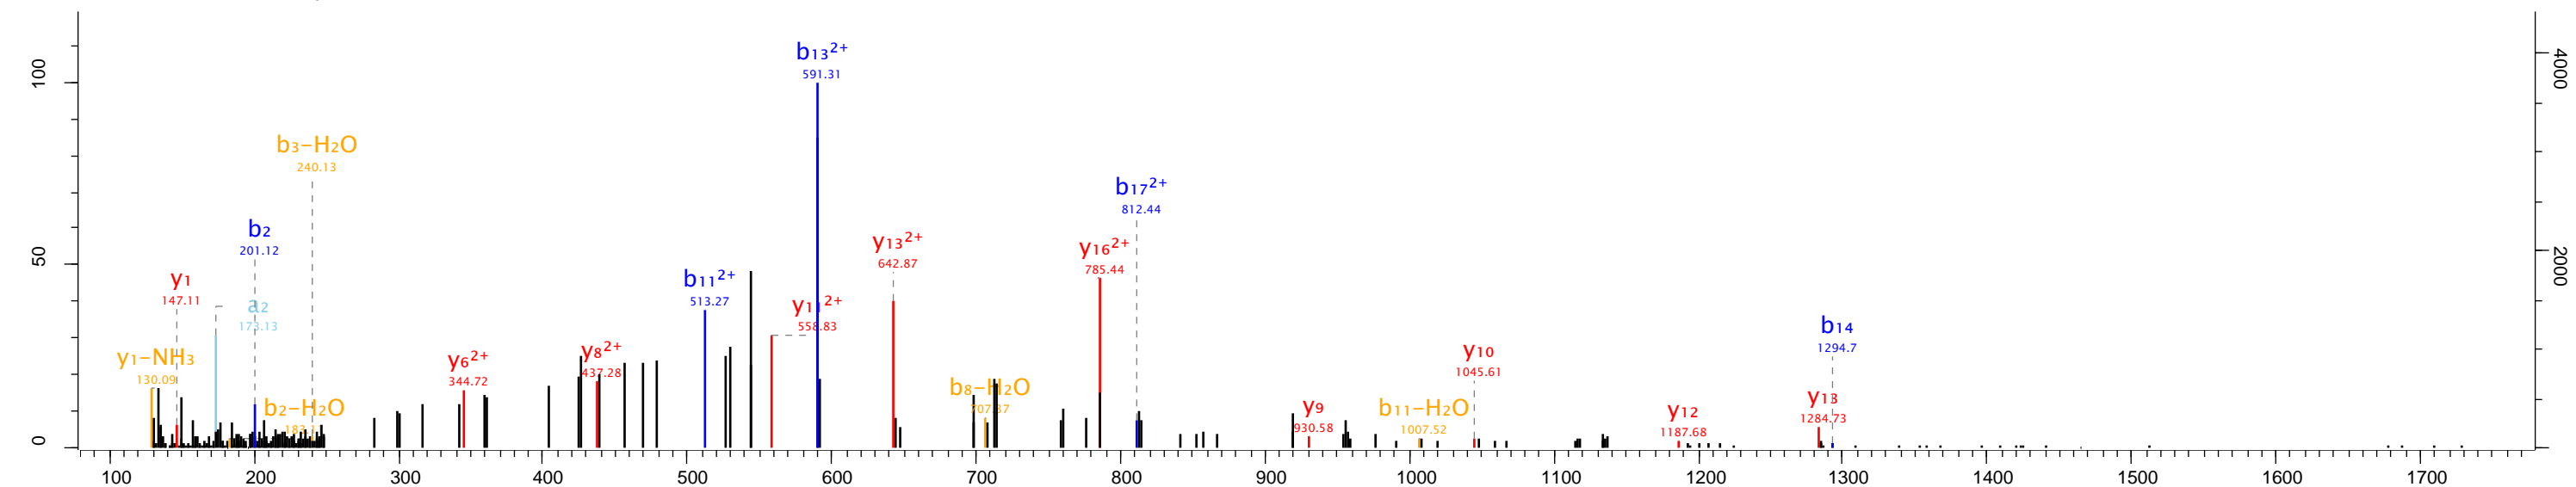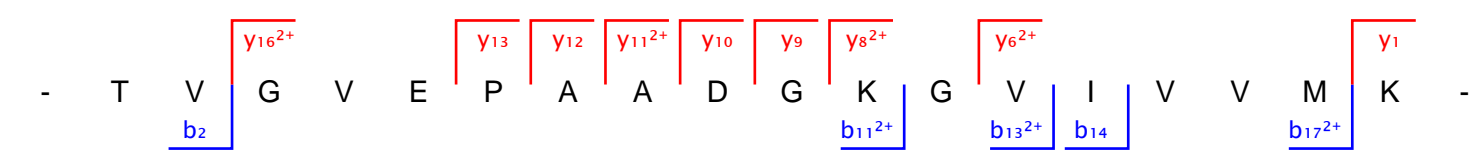

Spectral Annotation for Single-Peptide IDs in 16-cell Embryo using Q-OT-LIT

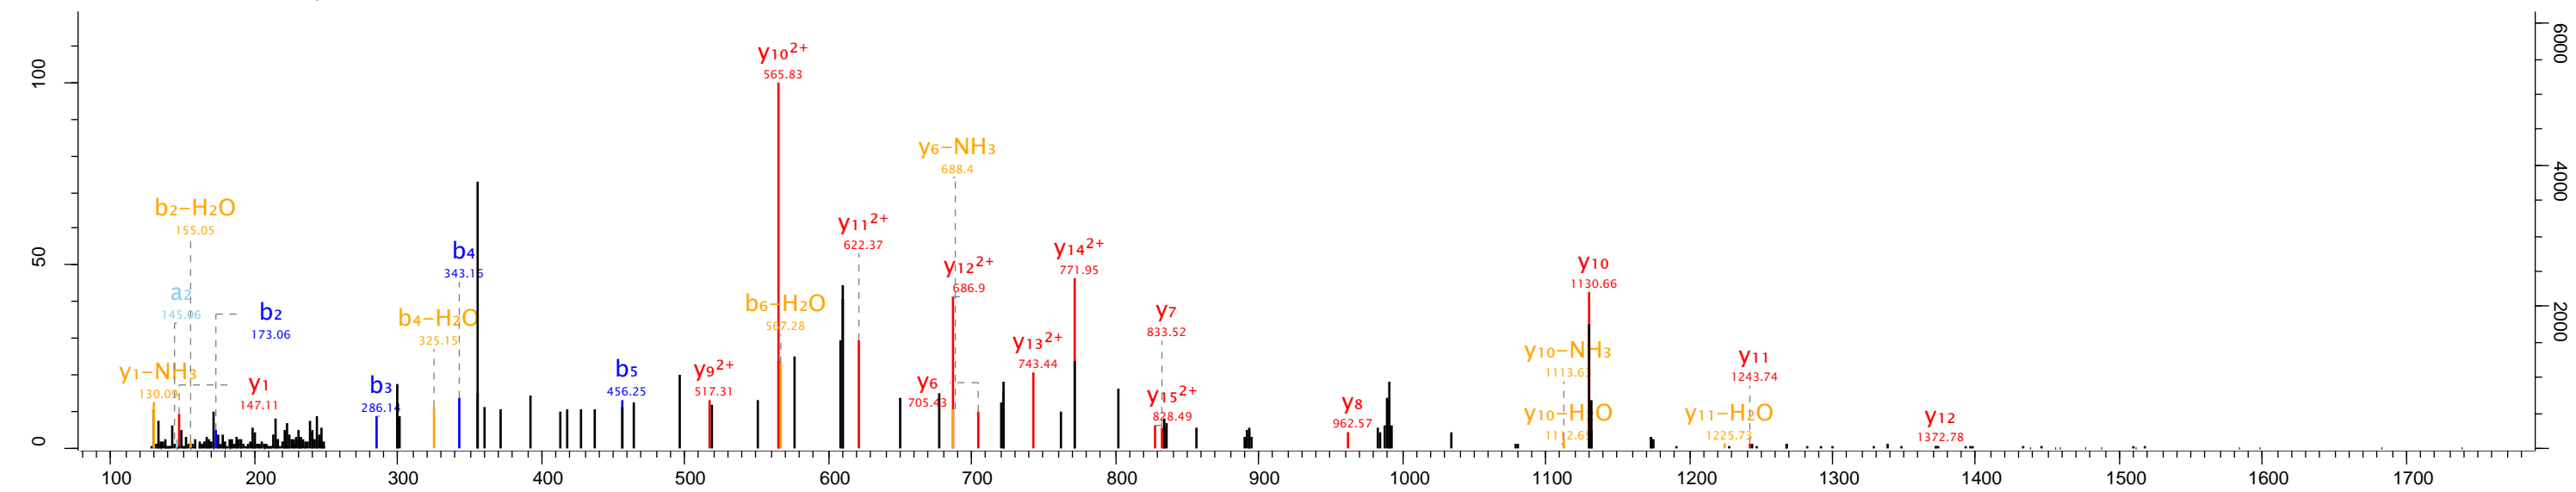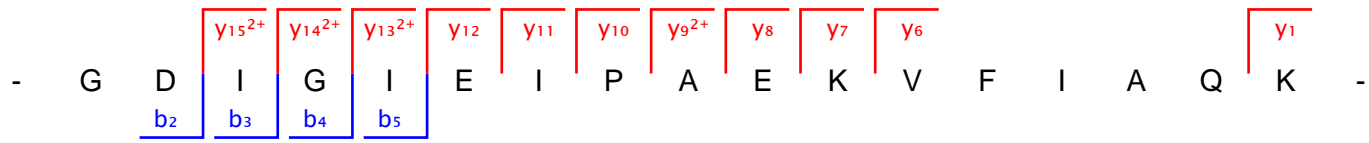

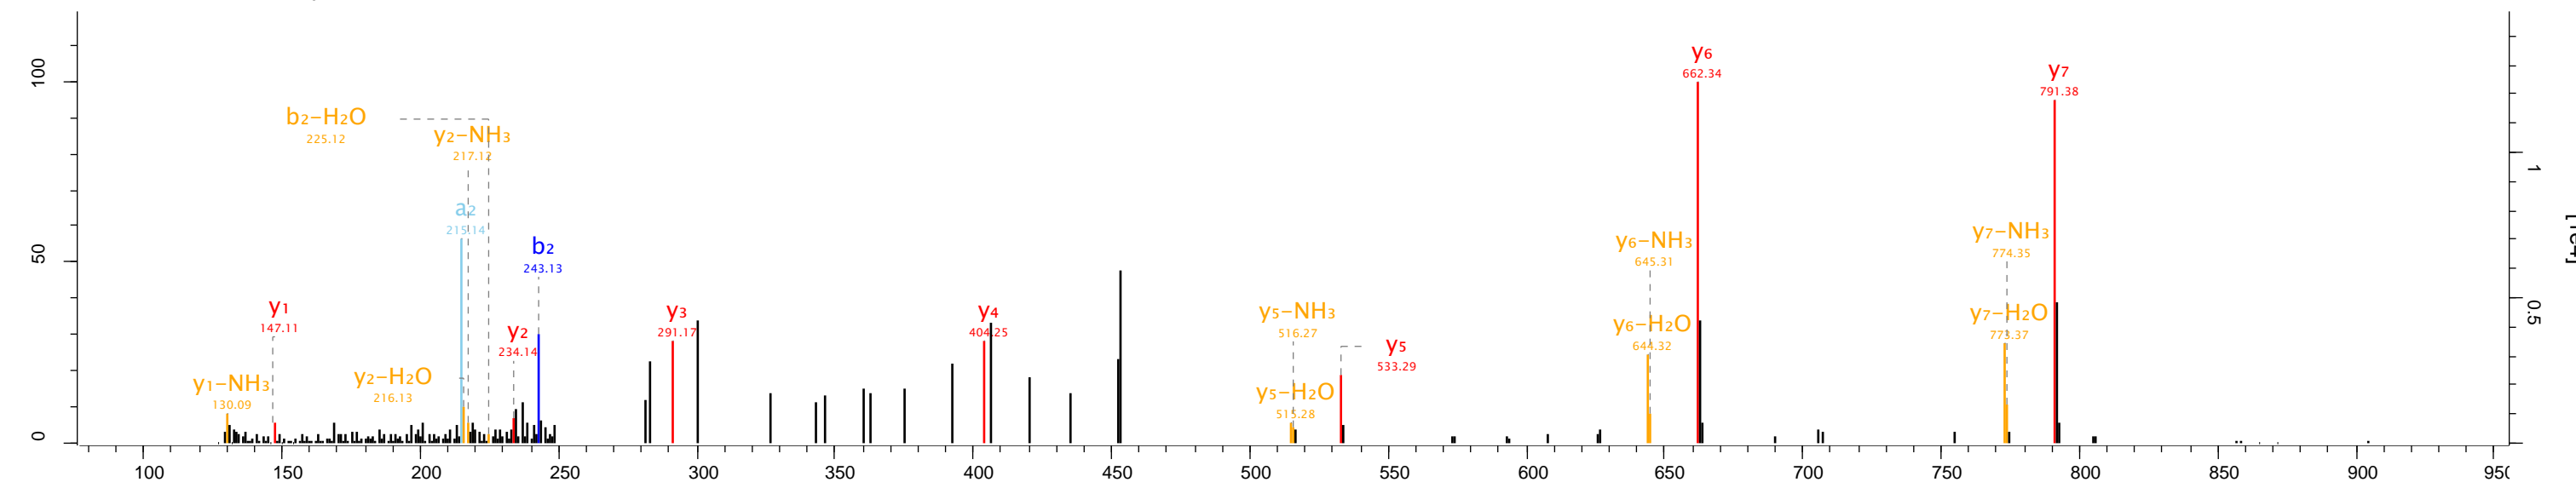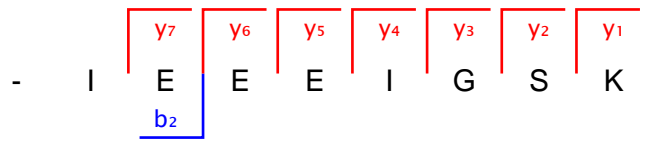

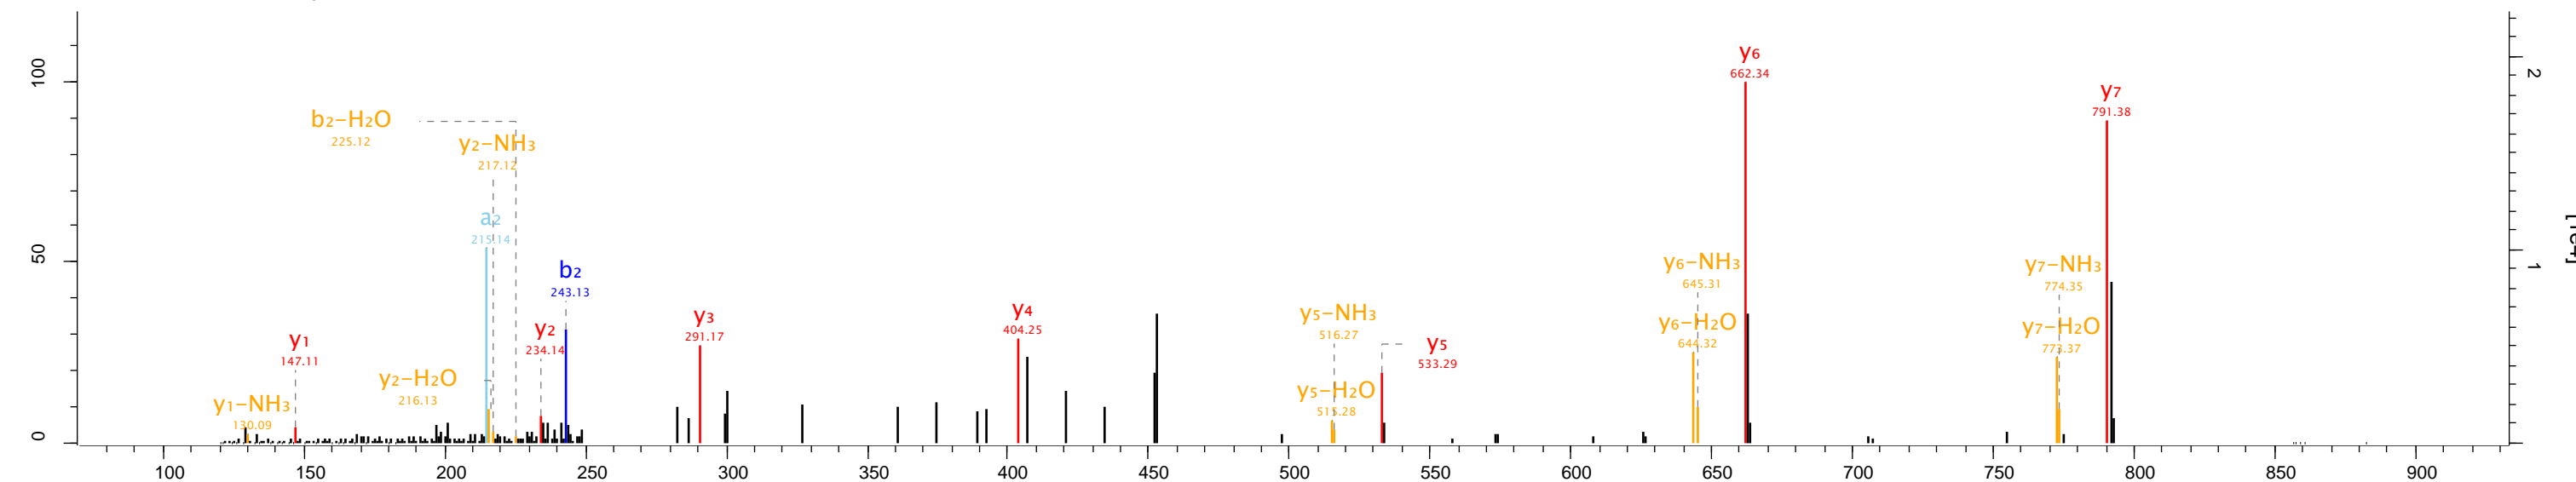

Raw file: 2015-01-05\_CL02\_2Excl15sMaxInj70  
 Scan: 12933 Method: ITMS; HCD Score: 100.02 m/z: 452.73

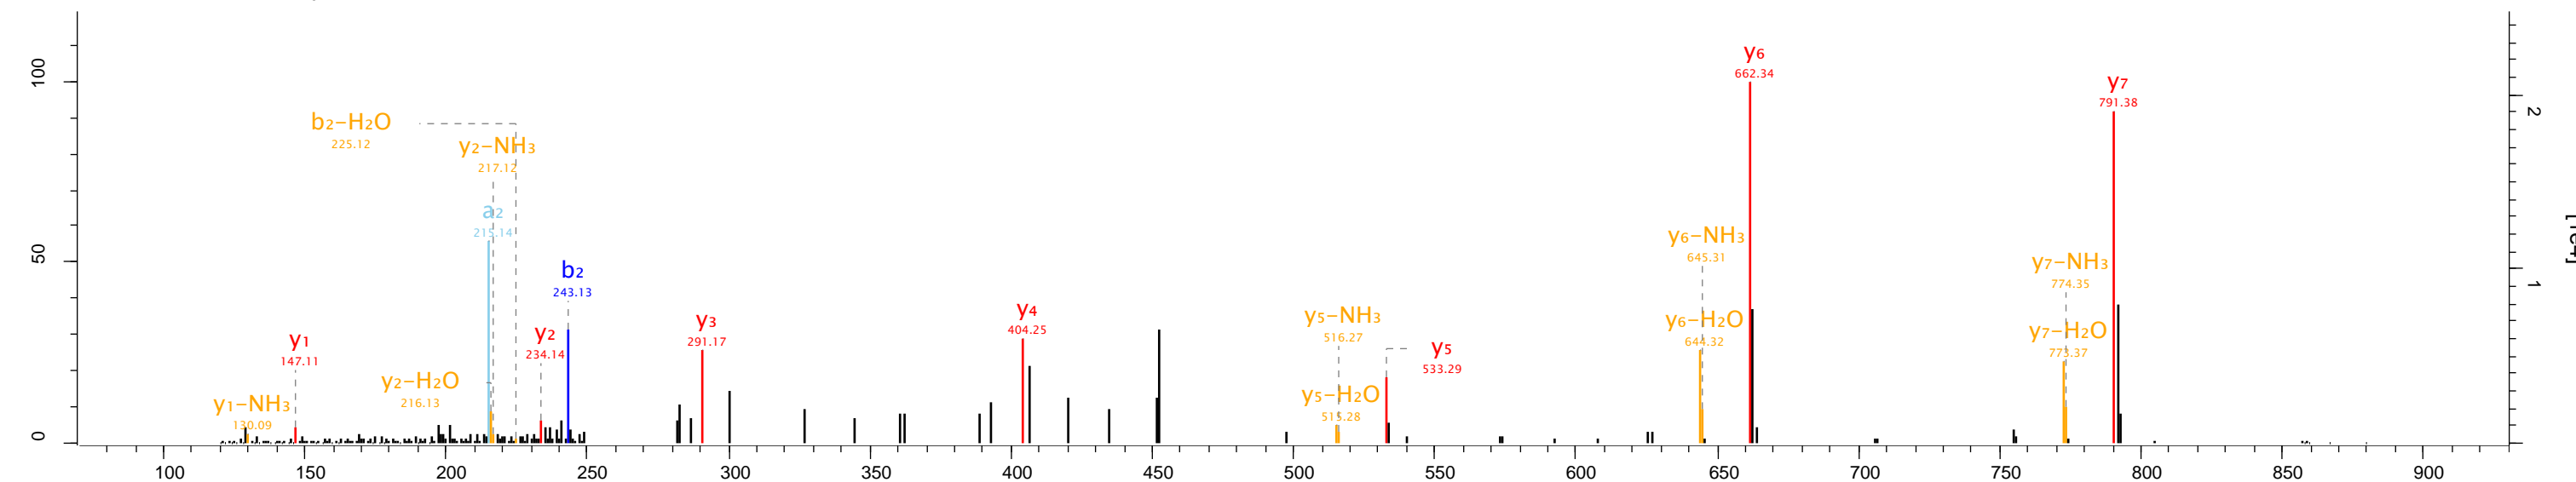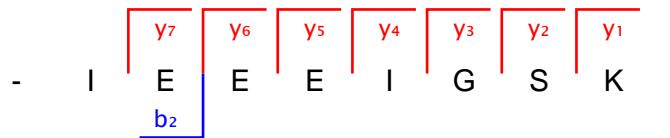

Raw file 2015-01-05\_CL02\_2Excl15sMaxInj70 Scan 13071 Method ITMS; HCD Score 105.52 m/z 451.27

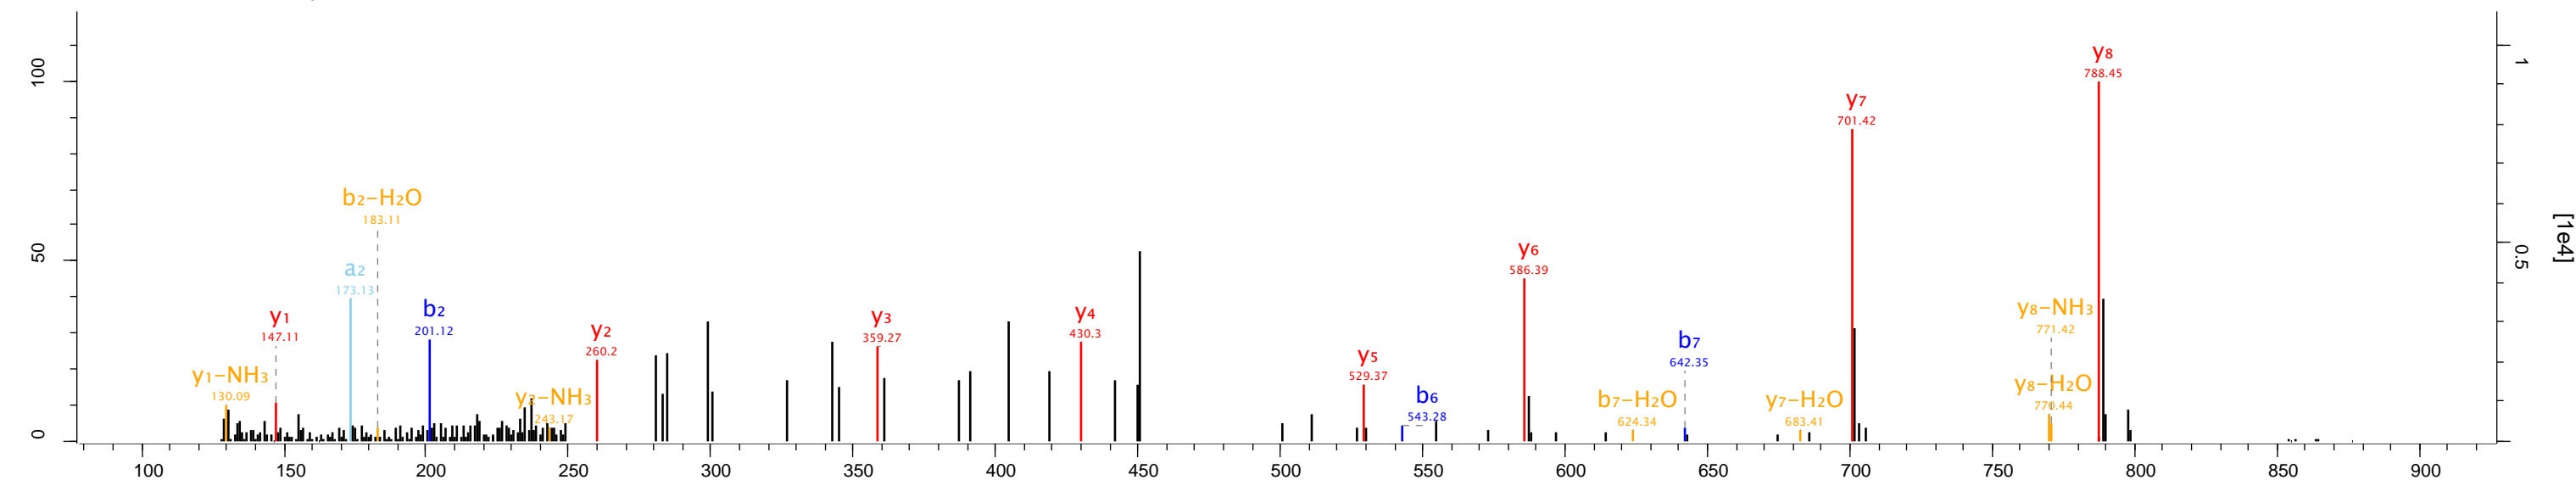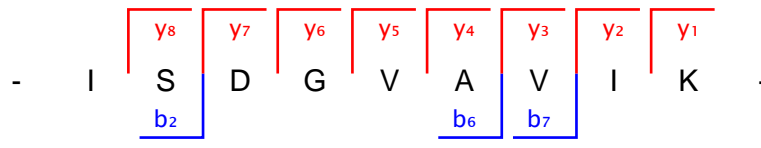

Spectral Annotation for Single-Peptide IDs in 16-cell Embryo using Q-OT-LIT



Raw file 2015-01-05\_CL02\_2Excl15sMaxInj70 Scan 13090 Method ITMS; HCD Score 104.01 m/z 451.27

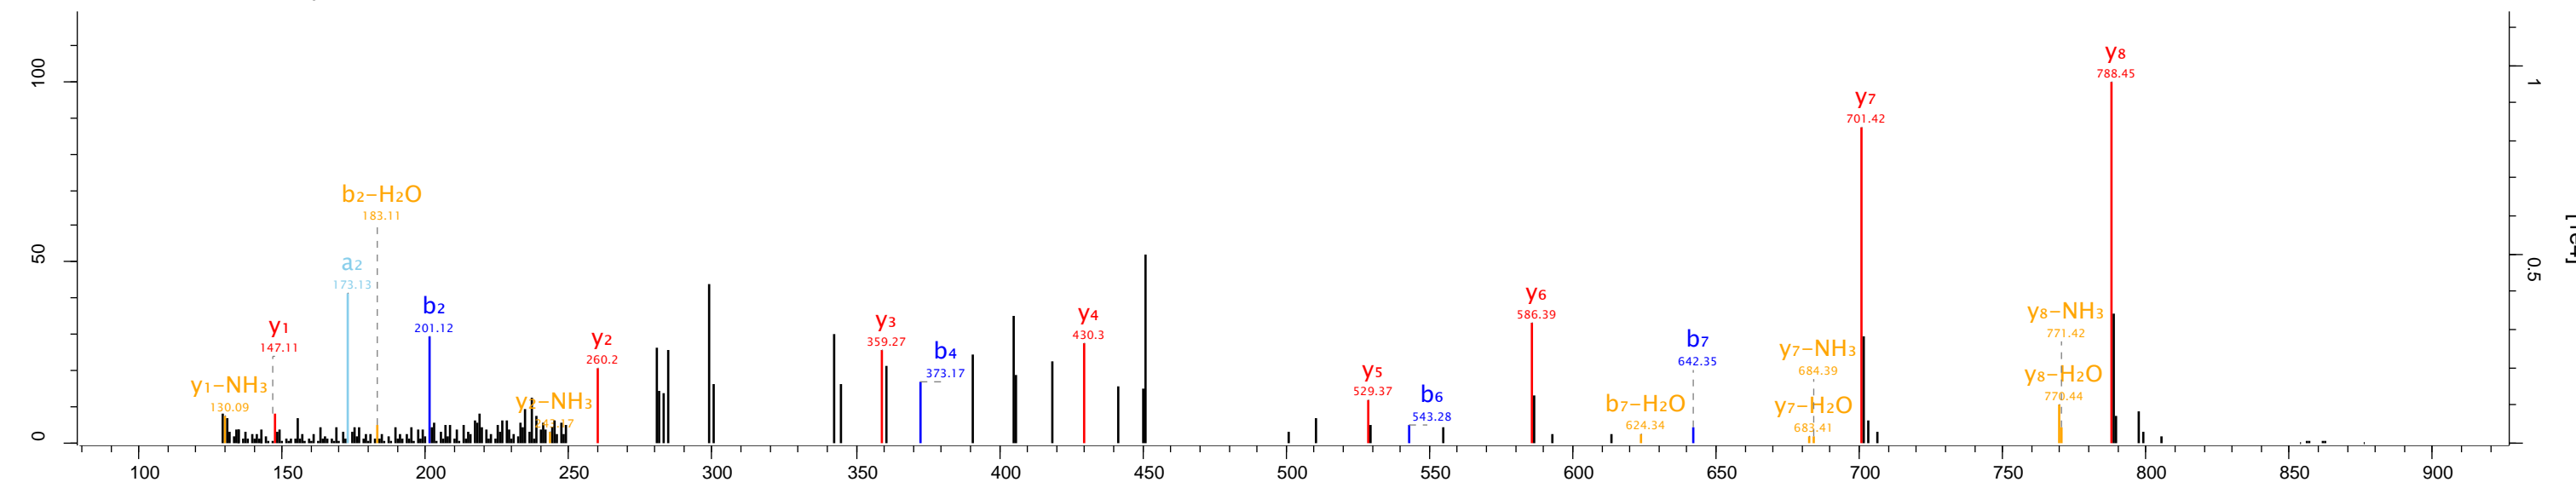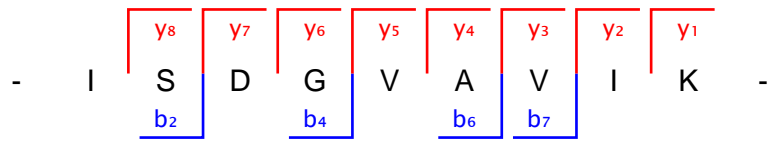

Spectral Annotation for Single-Peptide IDs in 16-cell Embryo using Q-OT-LIT

Raw file 2015-01-05\_CL02\_2Excl15sMaxInj70 Scan 13091 Method ITMS; HCD Score 83.95 m/z 457.79

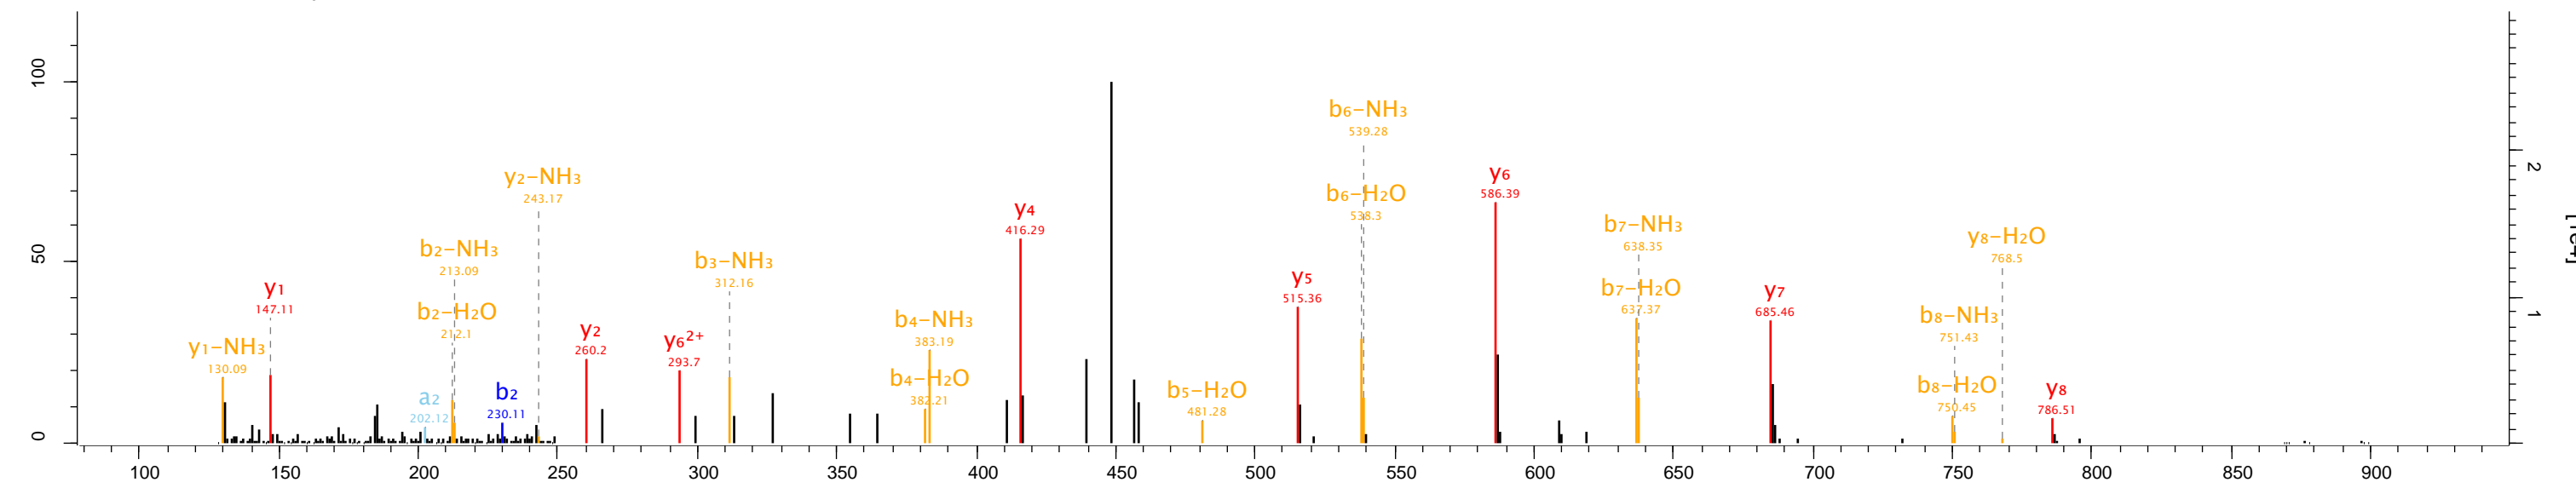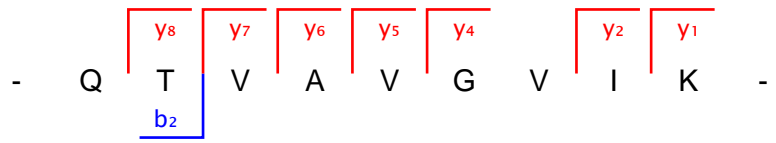

Raw file 2015-01-05\_CL02\_2Excl15sMaxInj70 Scan 13107 Method ITMS; HCD Score 106.6 m/z 451.27

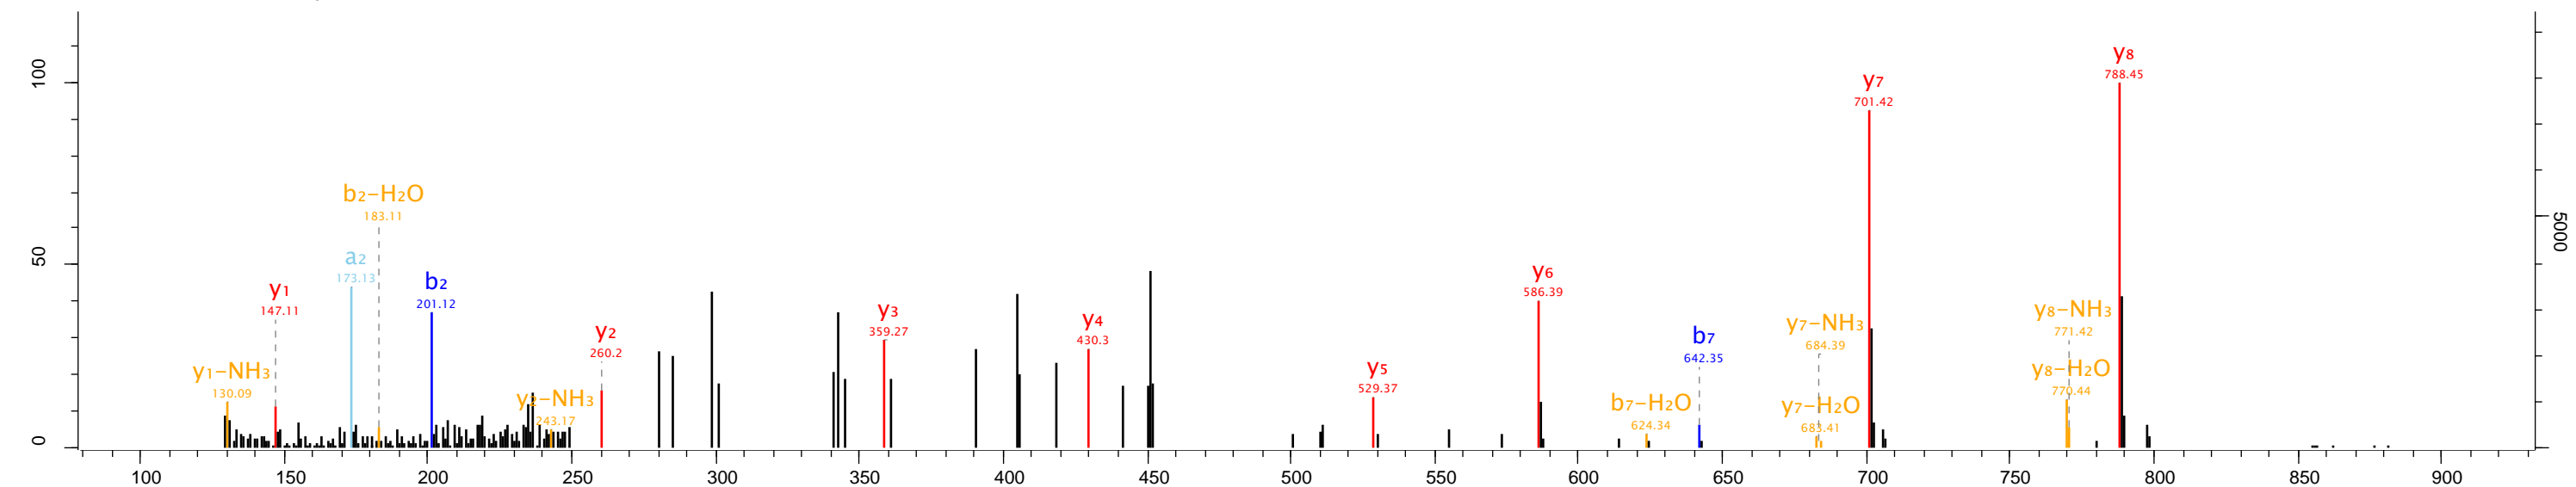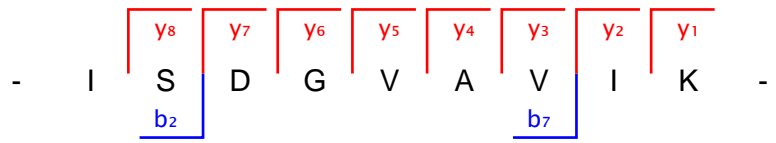

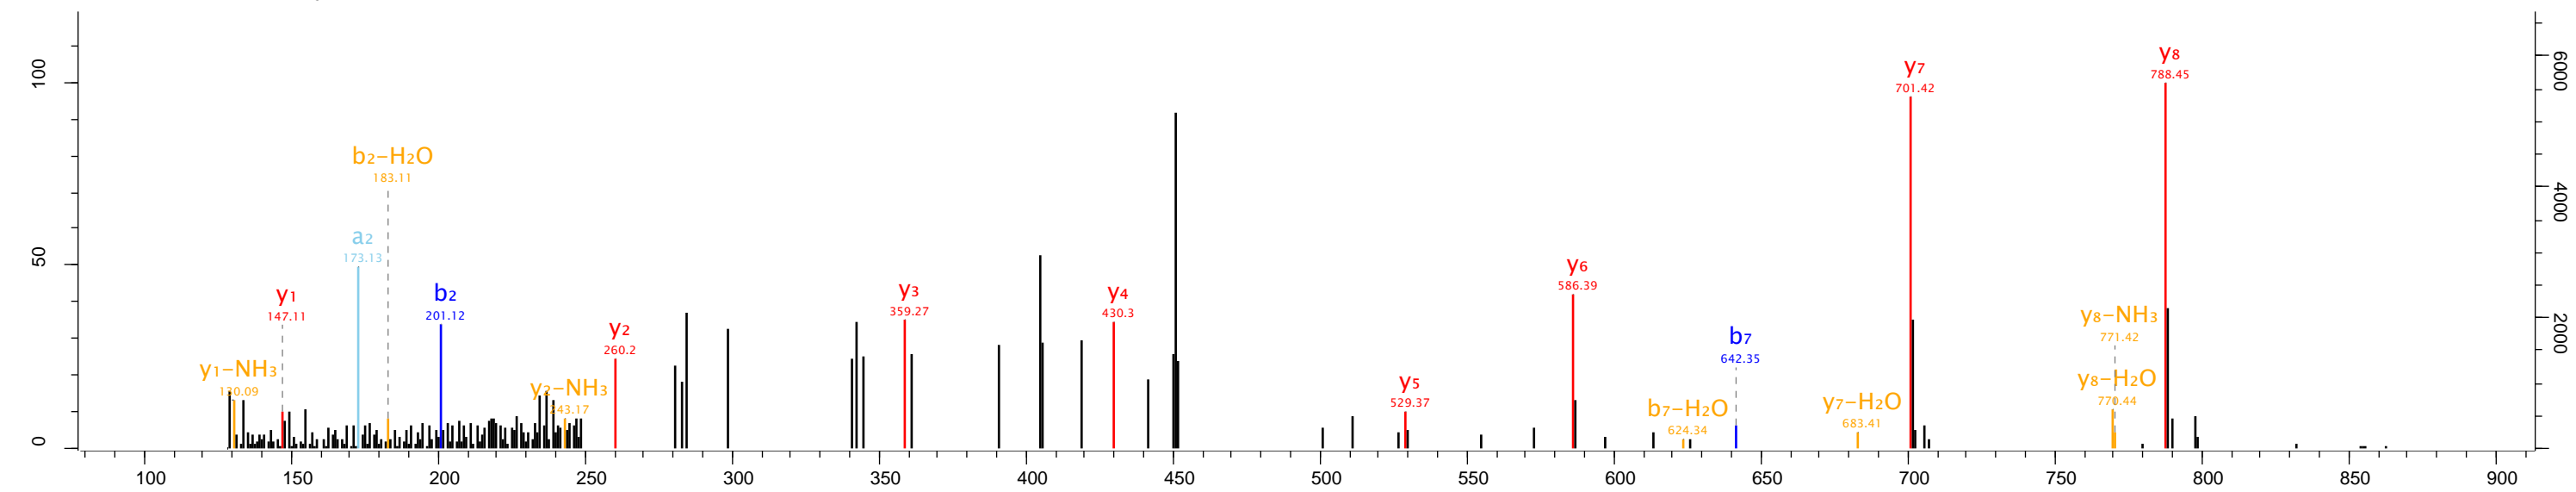

Raw file 2015-01-05\_CL02\_2Excl15sMaxInj70 Scan 13151 Method ITMS; HCD Score 71.4 m/z 662.33

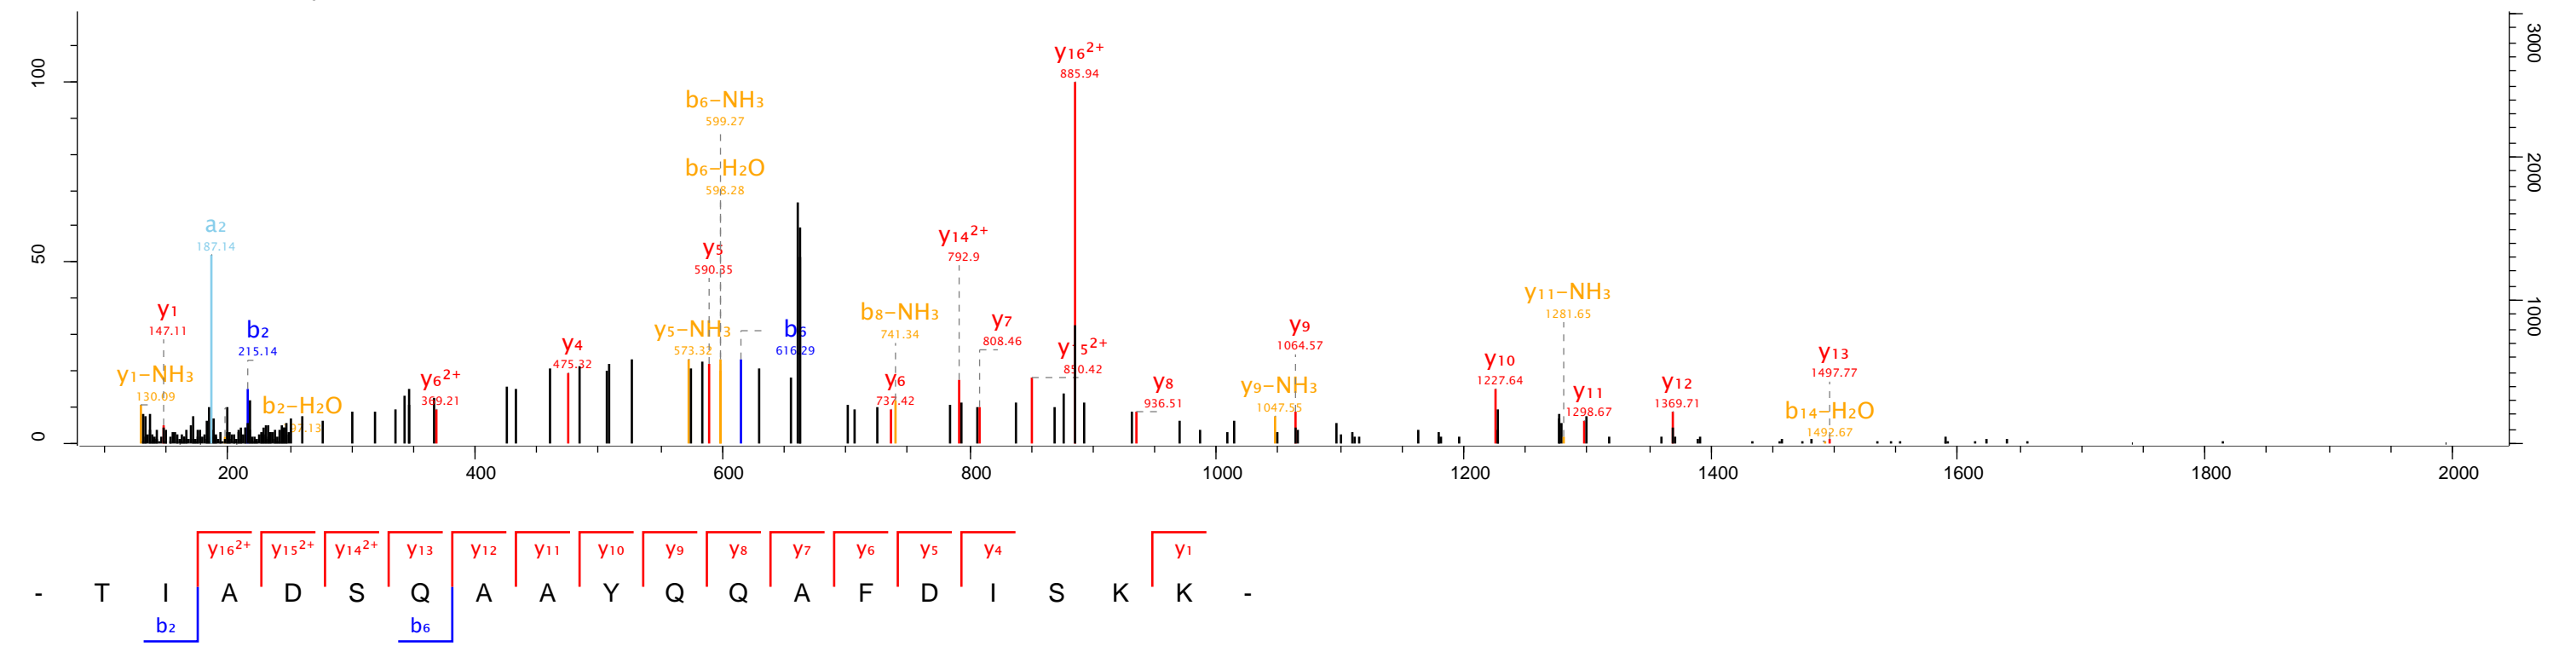

Spectral Annotation for Single-Peptide IDs in 16-cell Embryo using Q-OT-LIT

Raw file 2015-01-05\_CL02\_2Excl15sMaxInj70 Scan 13185 Method ITMS; HCD Score 75.91 m/z 666.02

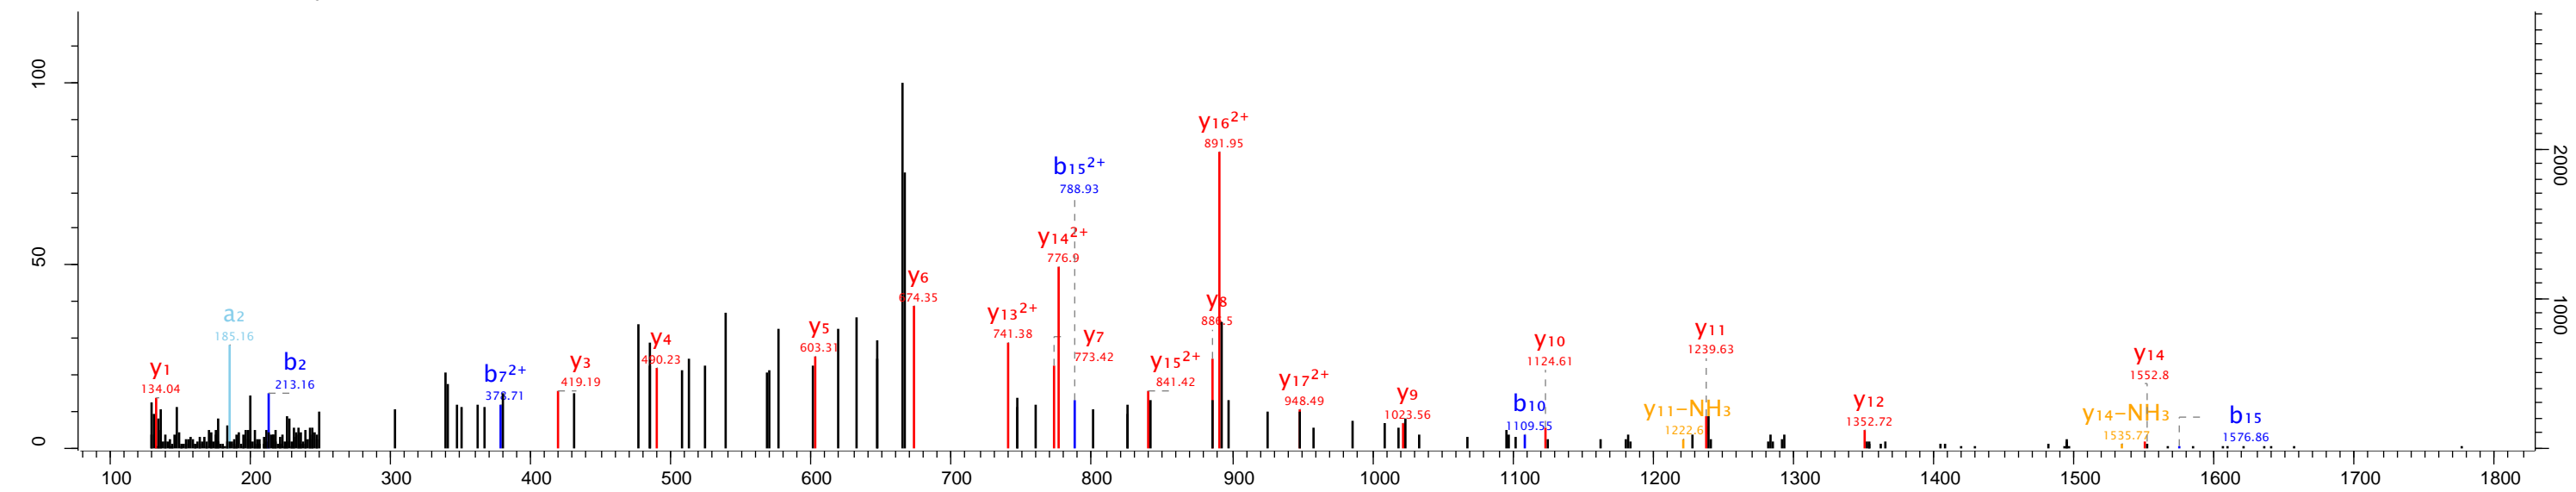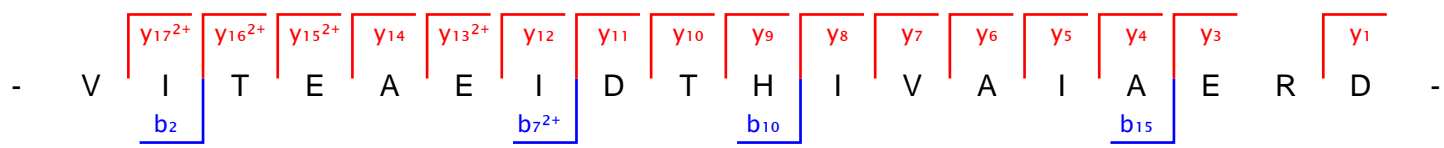

Spectral Annotation for Single-Peptide IDs in 16-cell Embryo using Q-OT-LIT

Raw file 2015-01-05\_CL02\_2Excl15sMaxInj70 Scan 13281 Method ITMS; HCD Score 53.95 m/z 668

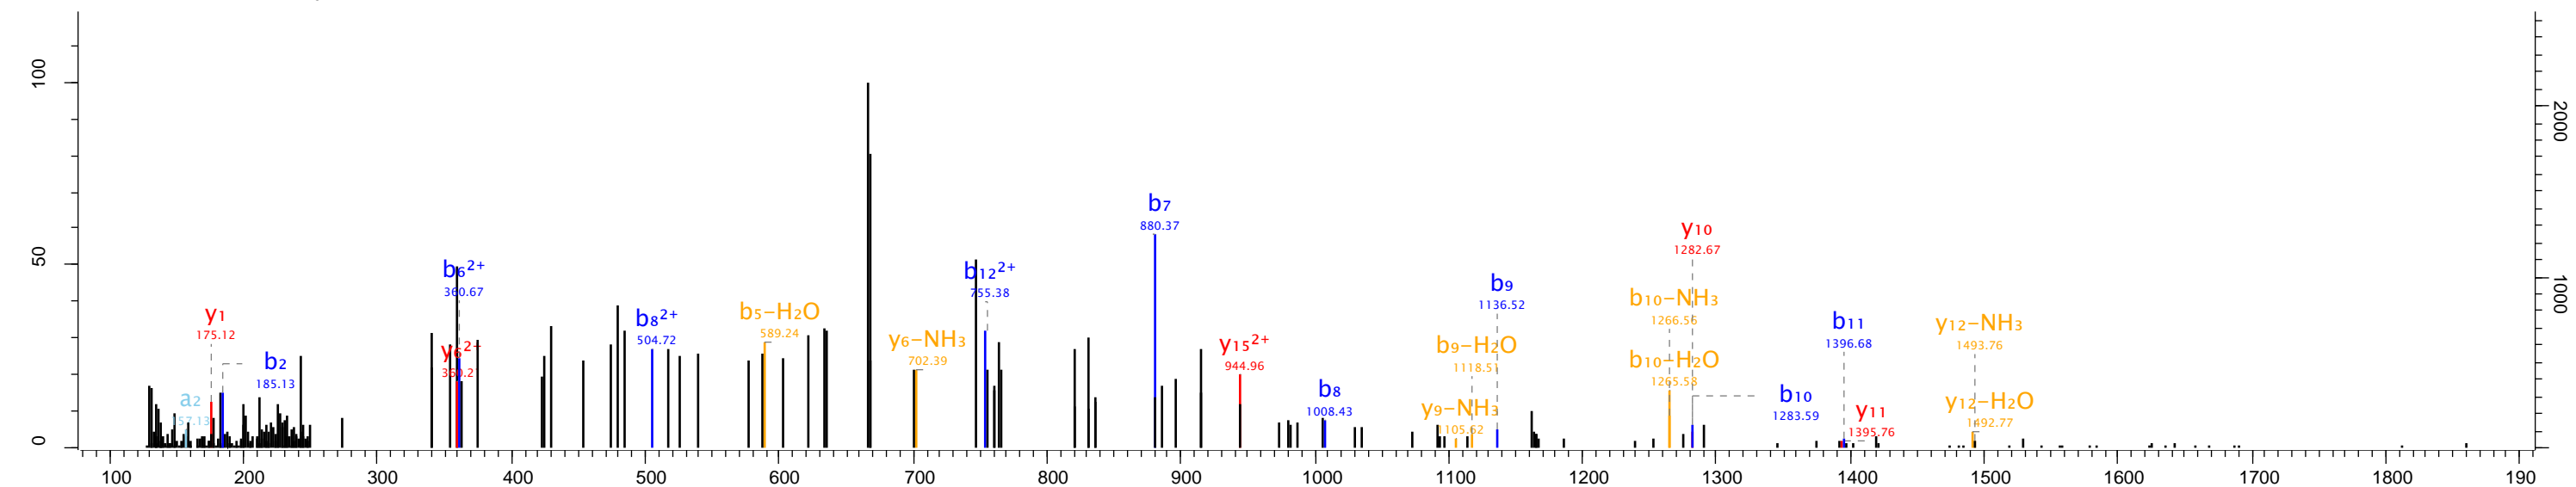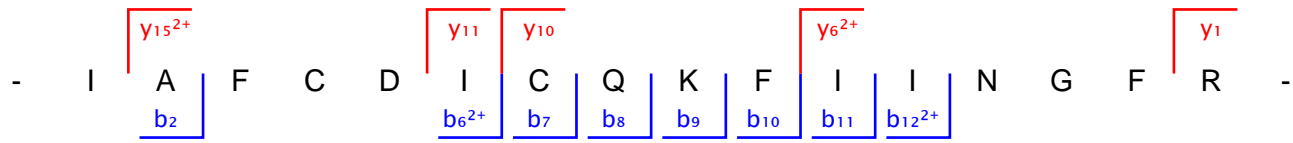

Spectral Annotation for Single-Peptide IDs in 16-cell Embryo using Q-OT-LIT

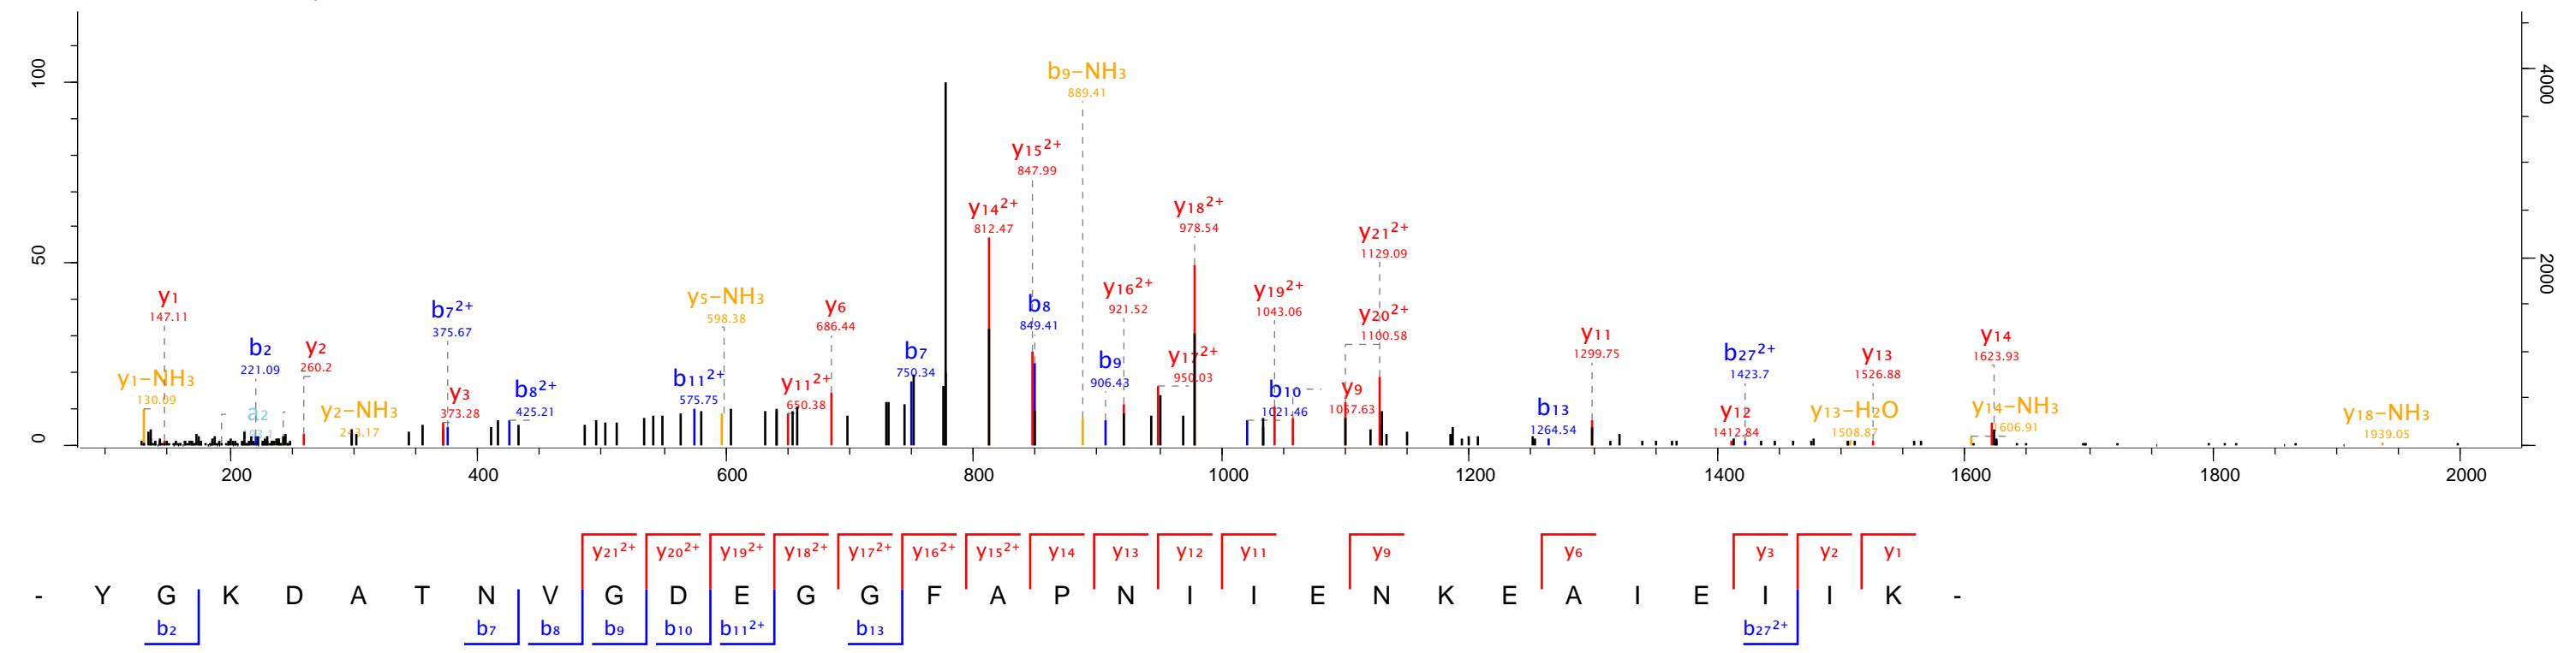



Raw file 2015-01-05\_CL02\_2Excl15sMaxInj70 Scan 13379 Method ITMS; HCD Score 43.24 m/z 772.86

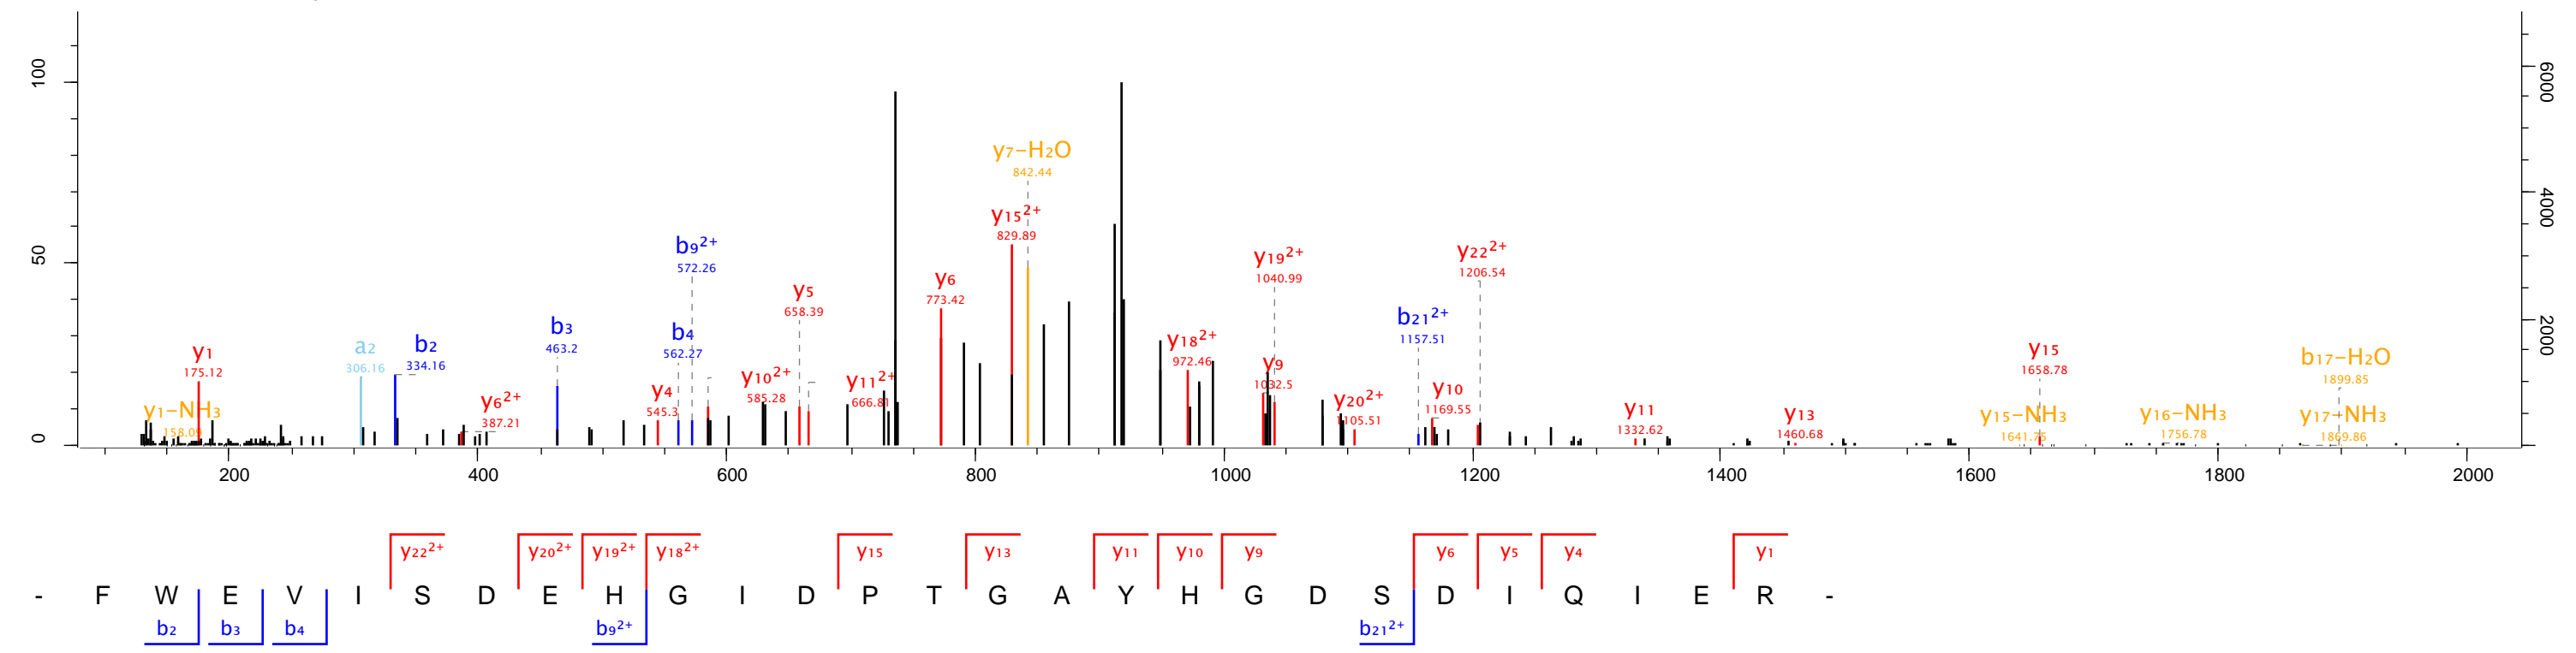

Spectral Annotation for Single-Peptide IDs in 16-cell Embryo using Q-OT-LIT

Raw file 2015-01-05\_CL02\_2Excl15sMaxInj70 Scan 13464 Method ITMS; HCD Score 63.89 m/z 654.66

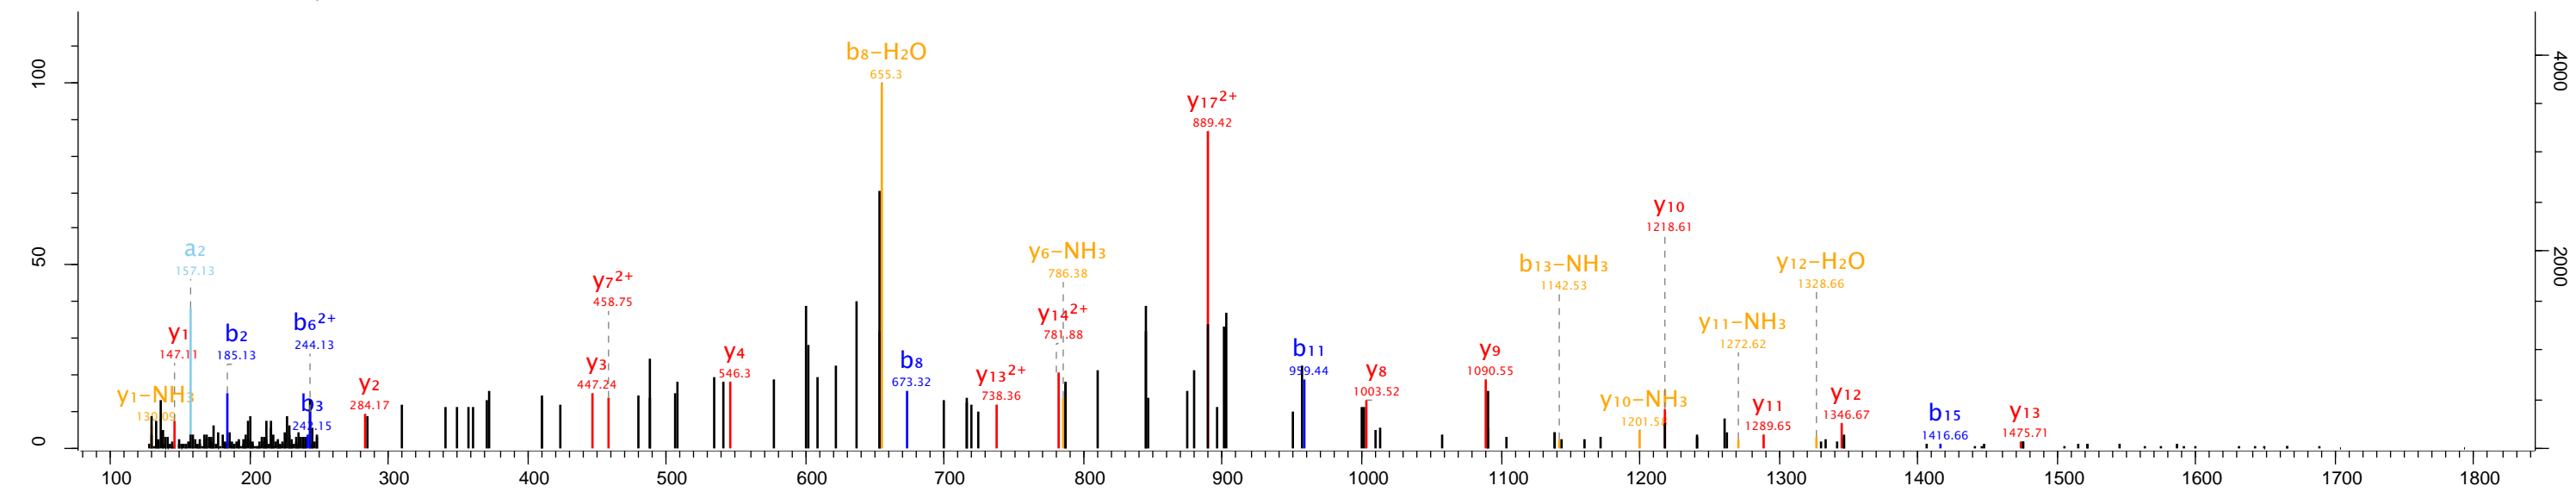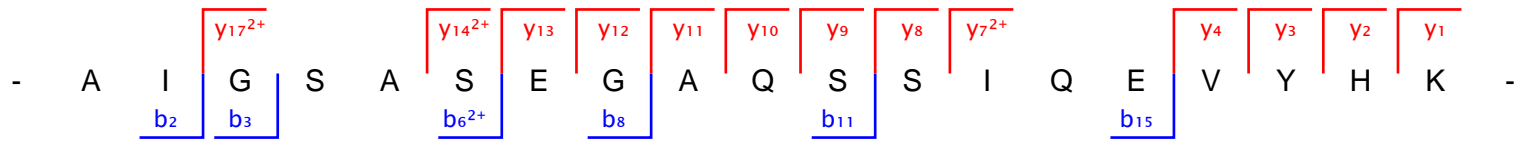

Spectral Annotation for Single-Peptide IDs in 16-cell Embryo using Q-OT-LIT

Raw file  
 2015-01-05\_CL02\_2Excl15sMaxInj70  
 Scan 13515 Method ITMS; HCD Score 41.49 m/z 654

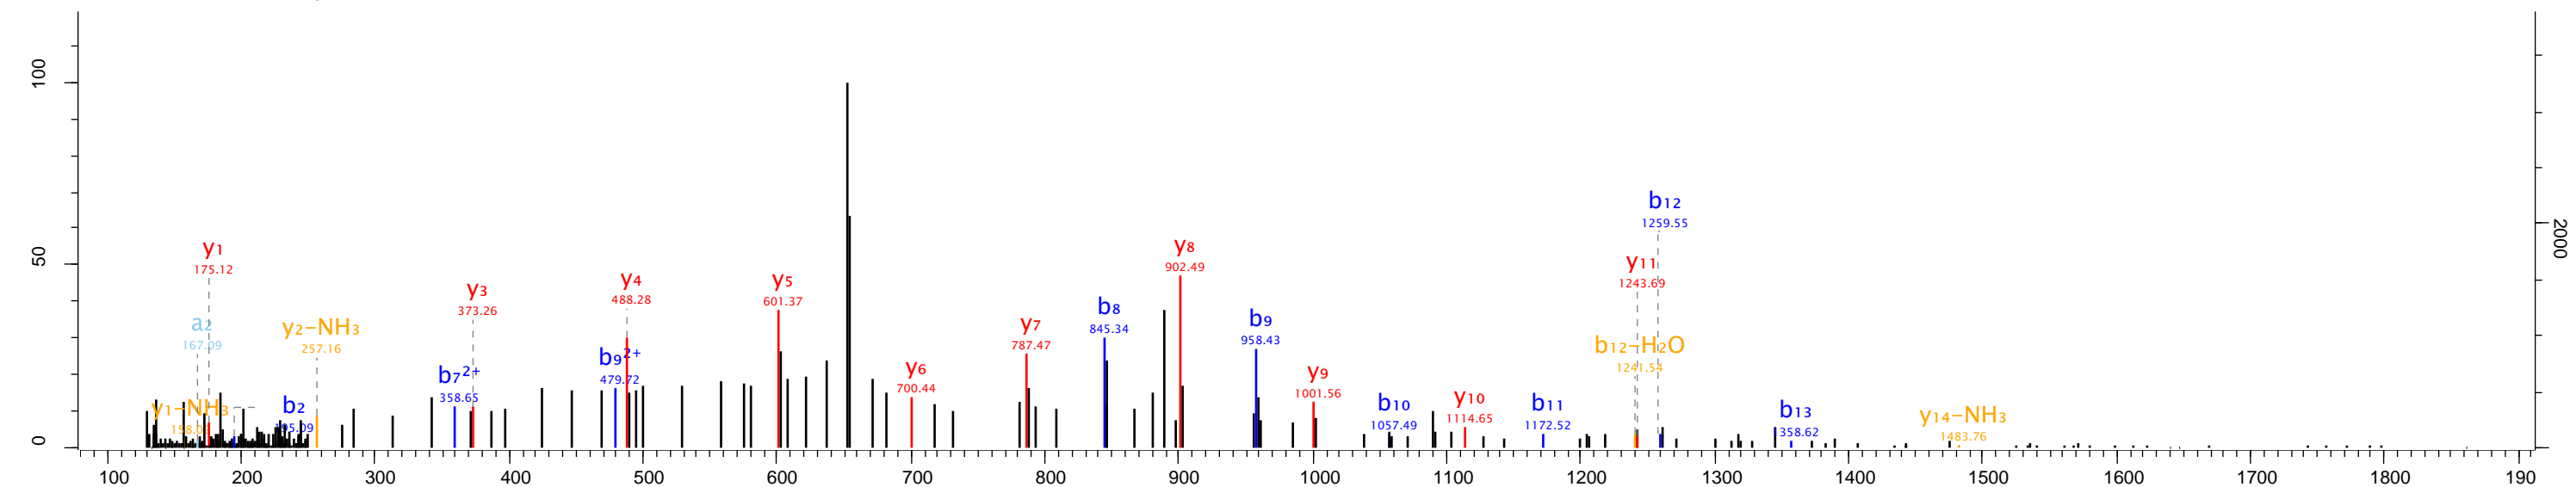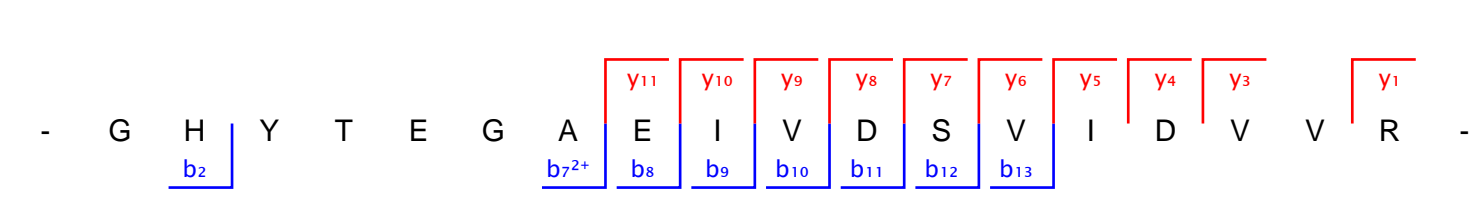

Raw file  
 2015-01-05\_CL02\_2Excl15sMaxInj70  
 Scan 13529 Method ITMS; HCD Score 64.27 m/z 661.32

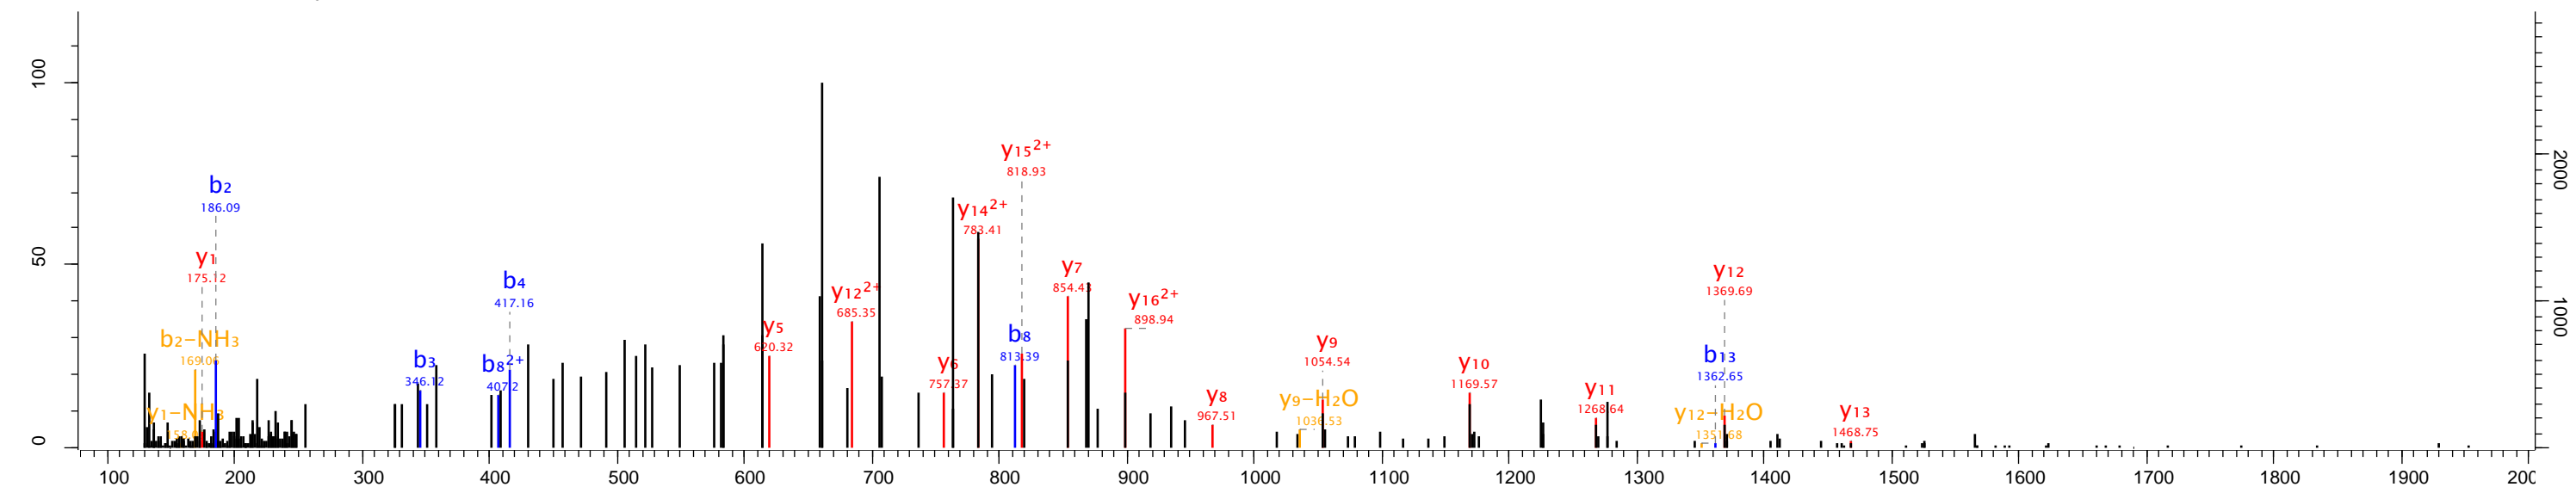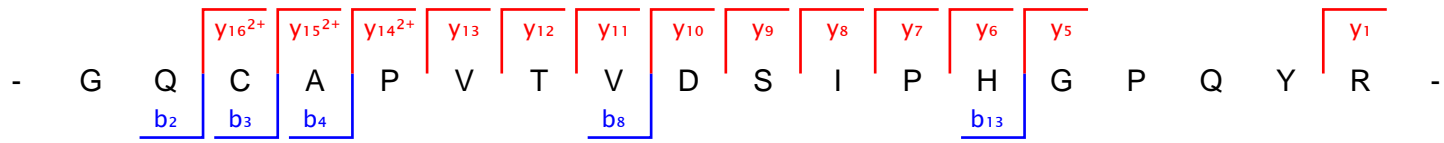

Spectral Annotation for Single-Peptide IDs in 16-cell Embryo using Q-OT-LIT

Raw file: 2015-01-05\_CL02\_2Excl15sMaxInj70  
 Scan: 13614 Method: ITMS; HCD Score: 70.62 m/z: 654.34

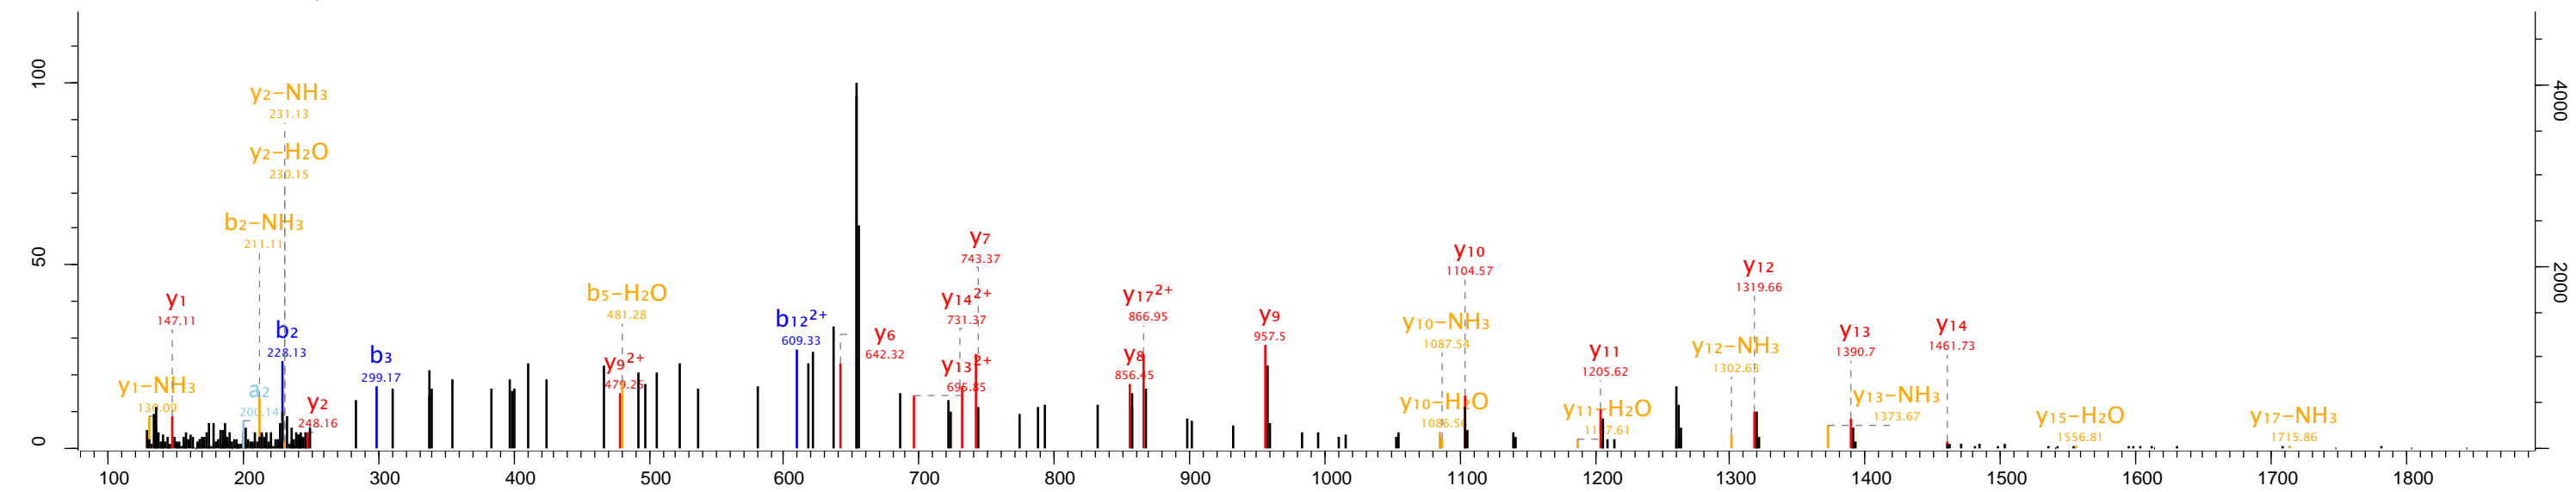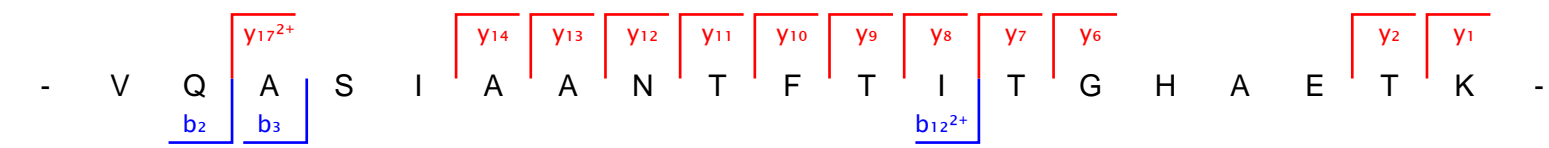

Spectral Annotation for Single-Peptide IDs in 16-cell Embryo using Q-OT-LIT

Raw file 2015-01-05\_CL02\_2Excl15sMaxInj70 Scan 13620 Method ITMS; HCD Score 55.05 m/z 772.61

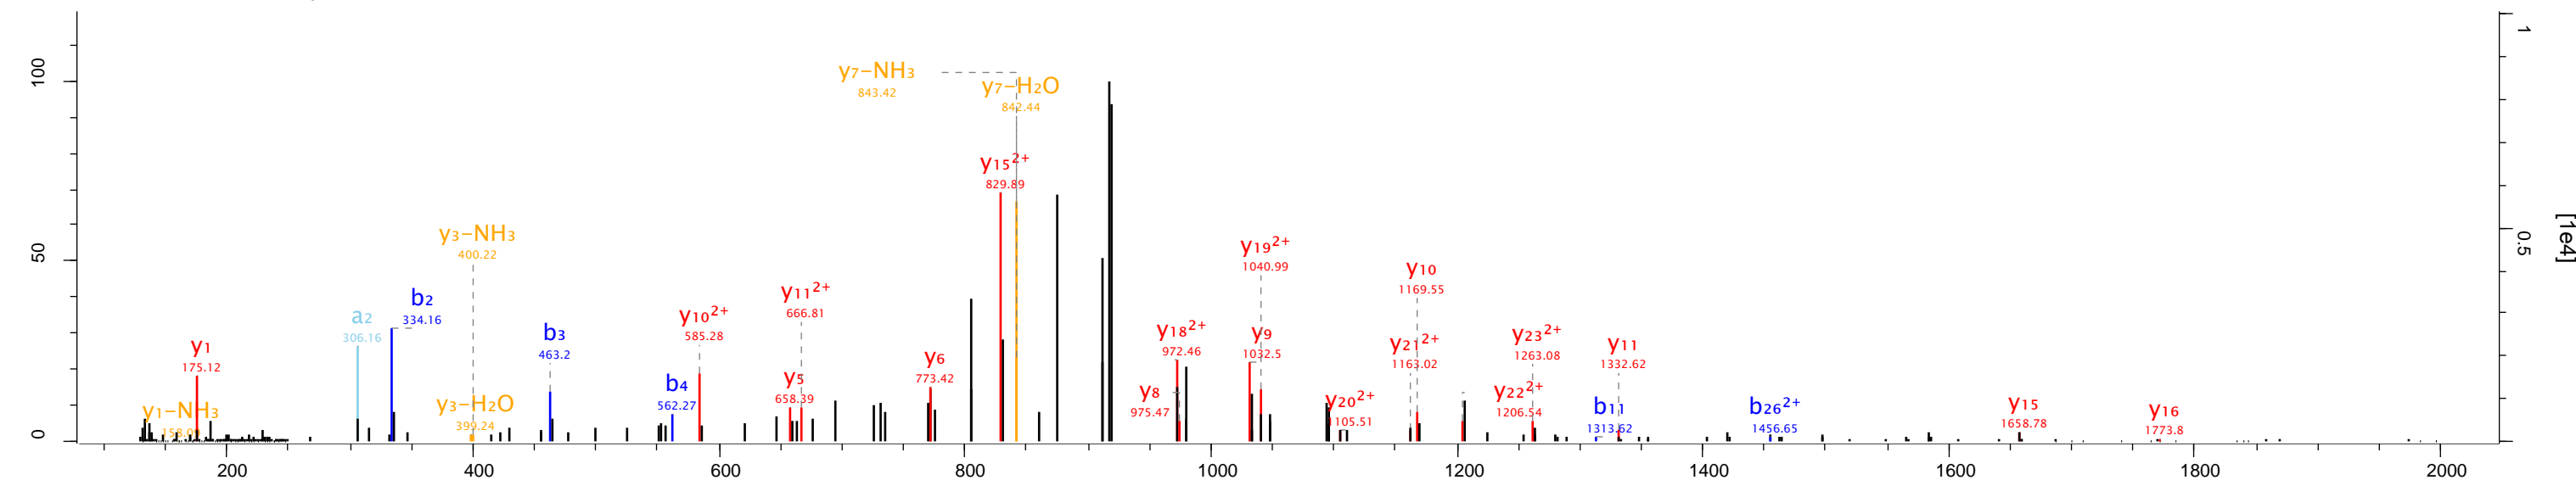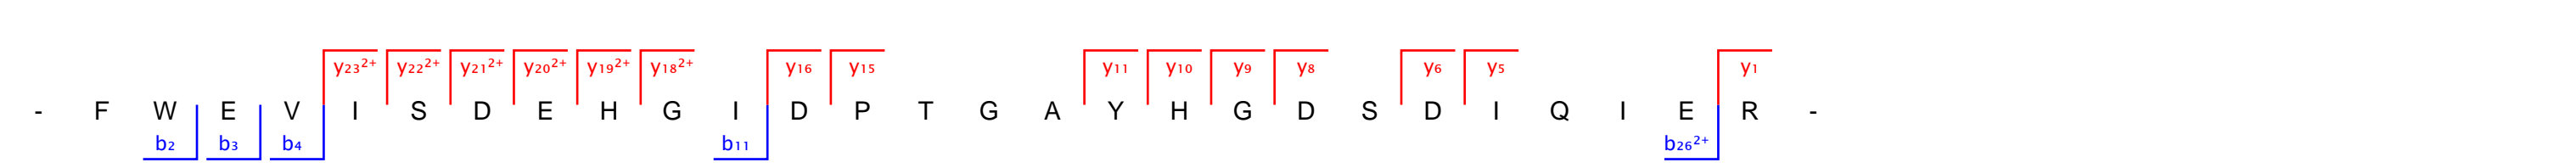

Raw file 2015-01-05\_CL02\_2Excl15sMaxInj70 Scan 13637 Method ITMS; HCD Score 76.12 m/z 654.01

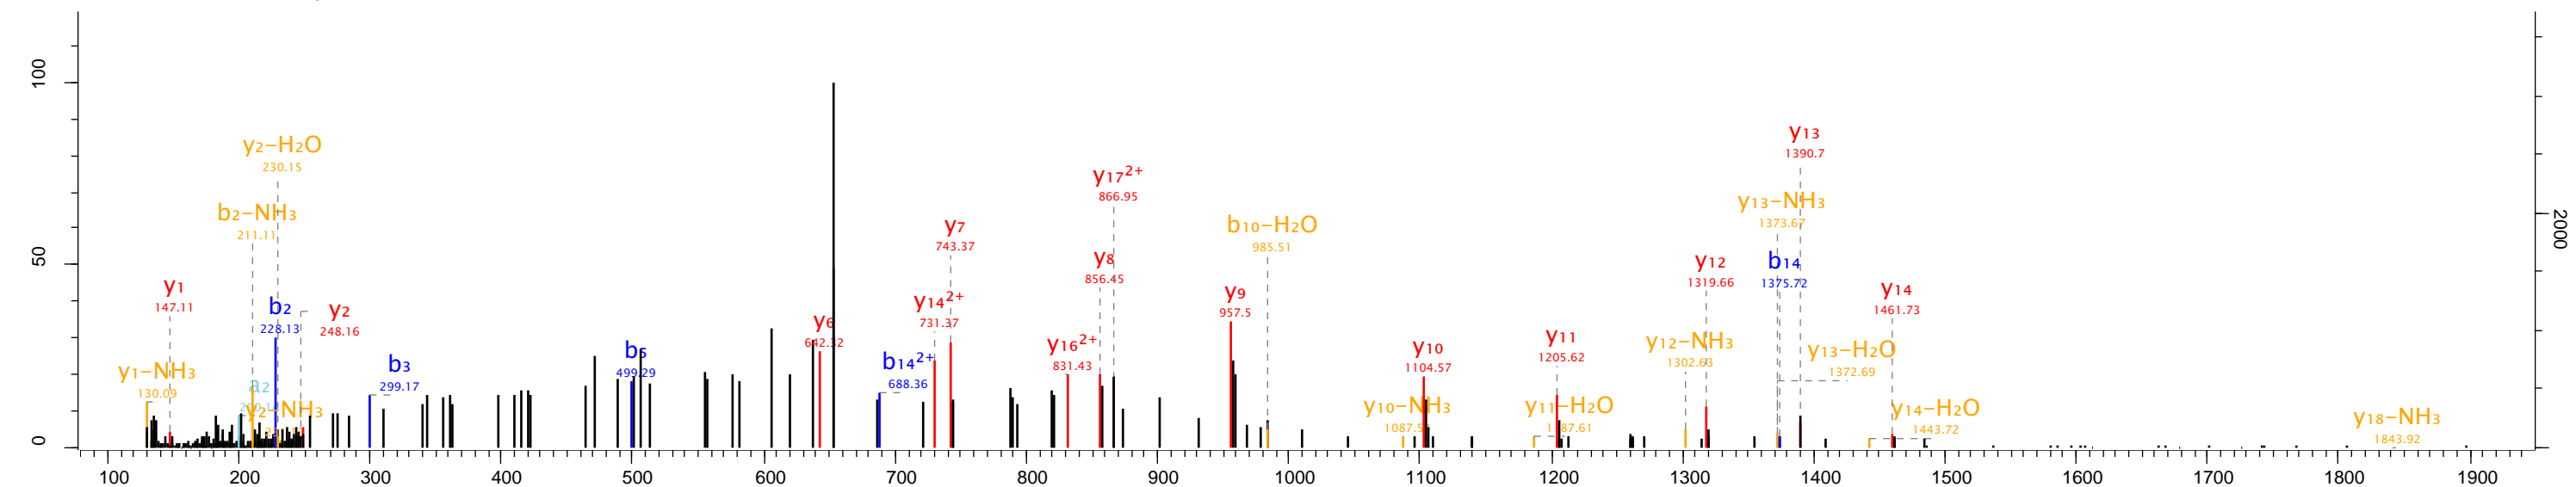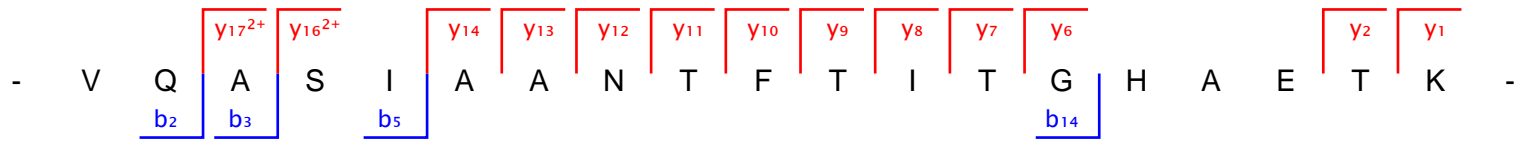

Spectral Annotation for Single-Peptide IDs in 16-cell Embryo using Q-OT-LIT

Raw file: 2015-01-05\_CL02\_2Excl15sMaxInj70  
 Scan: 13653 Method: ITMS; HCD Score: 83.95 m/z: 654.34

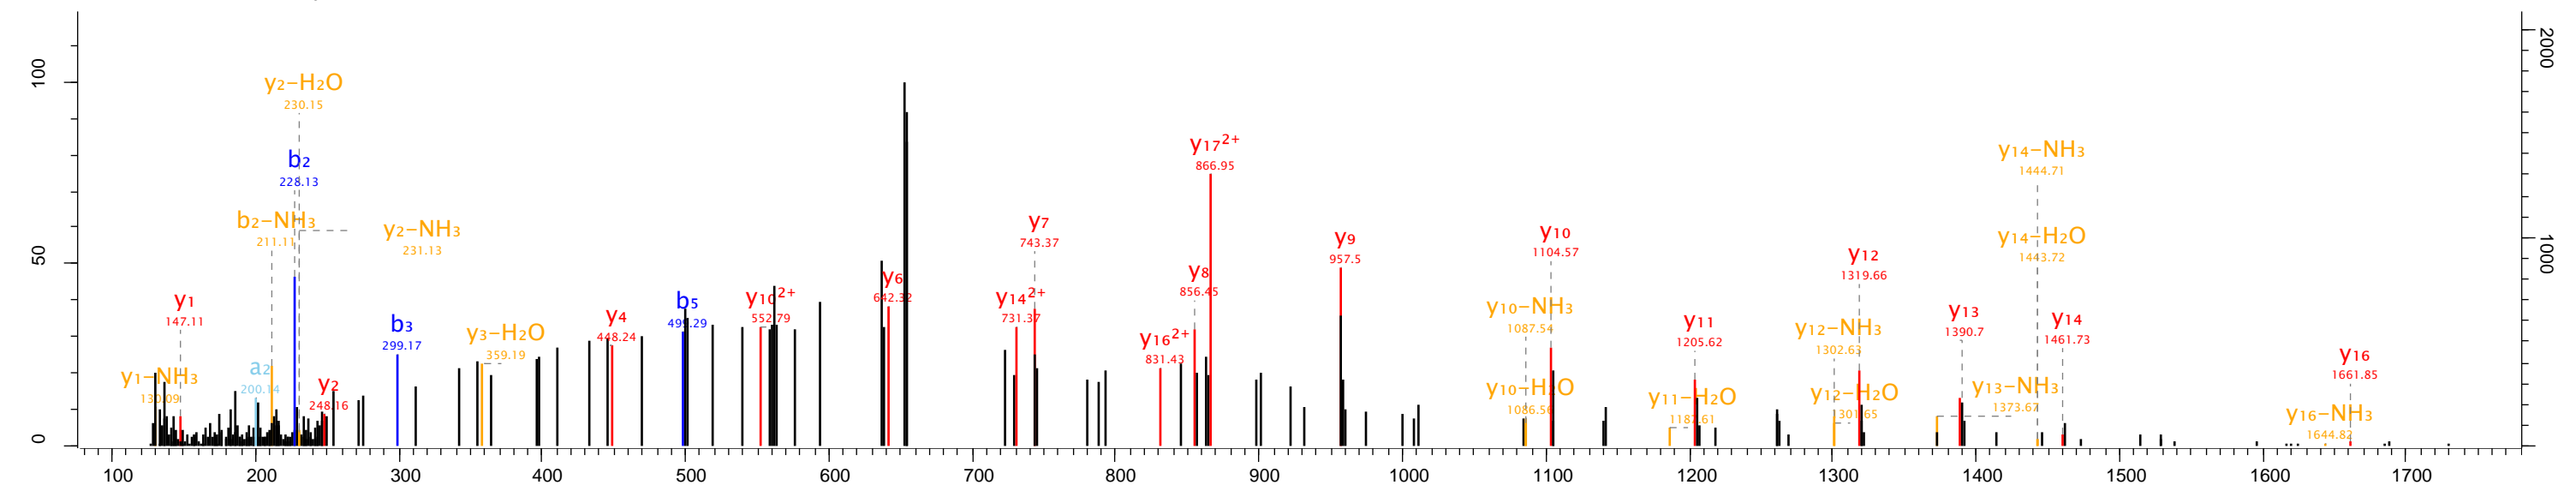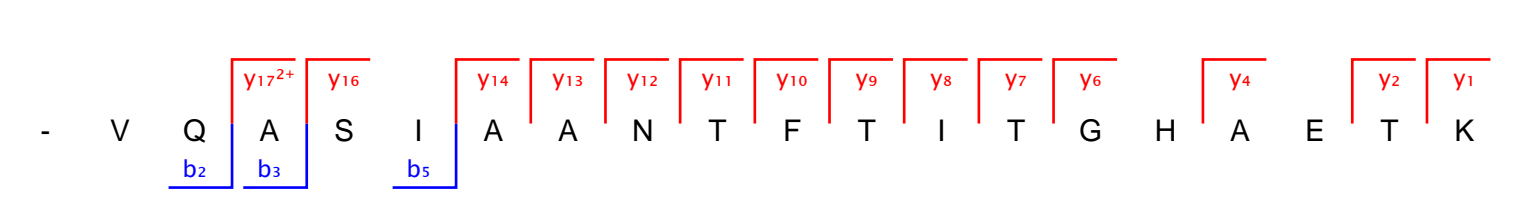

Spectral Annotation for Single-Peptide IDs in 16-cell Embryo using Q-OT-LIT



Raw file 2015-01-05\_CL02\_2Excl15sMaxInj70 Scan 13656 Method ITMS; HCD Score 75.18 m/z 772.61

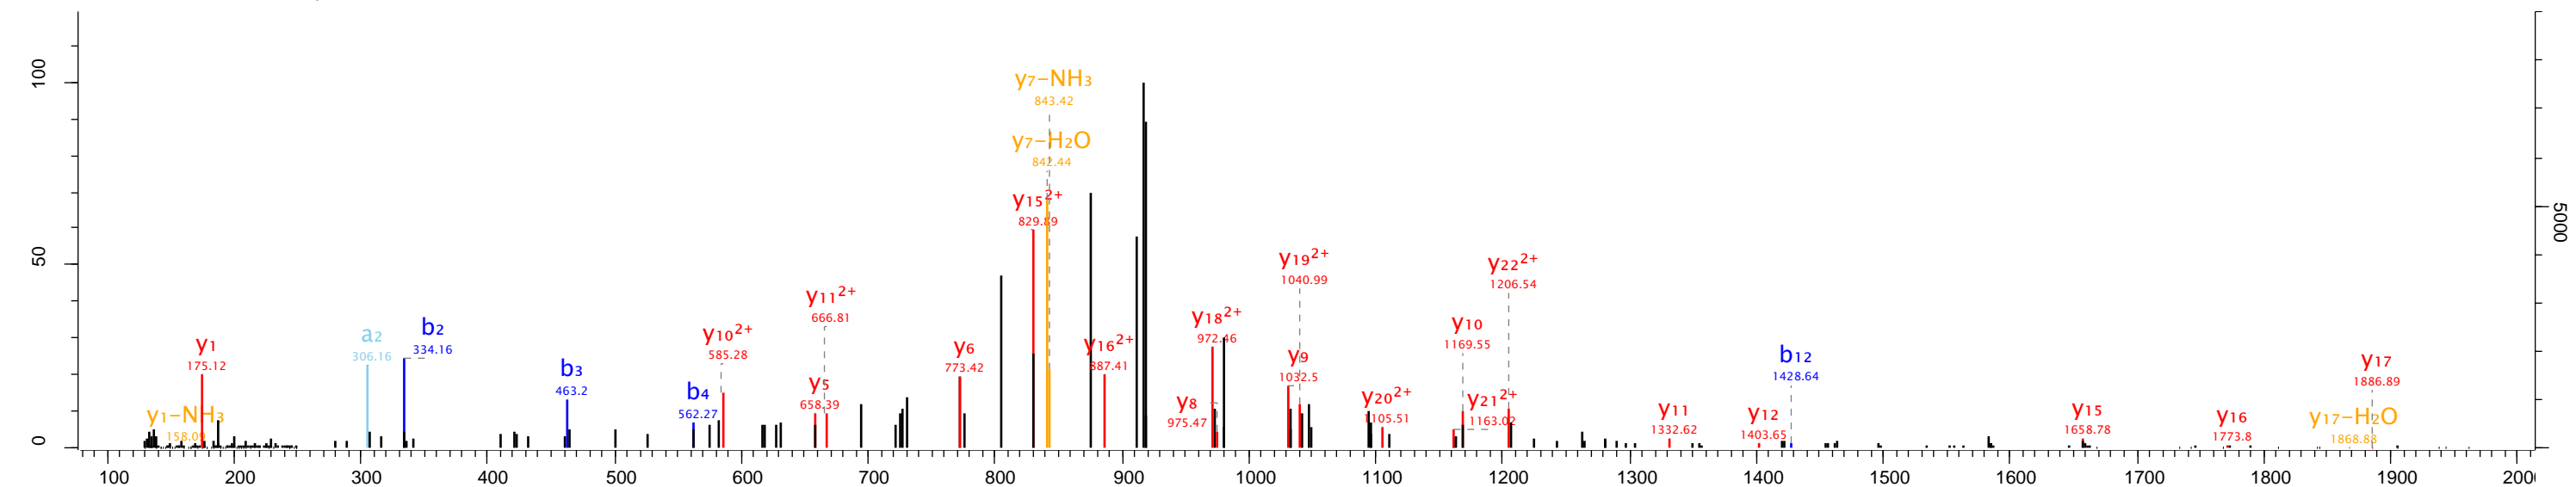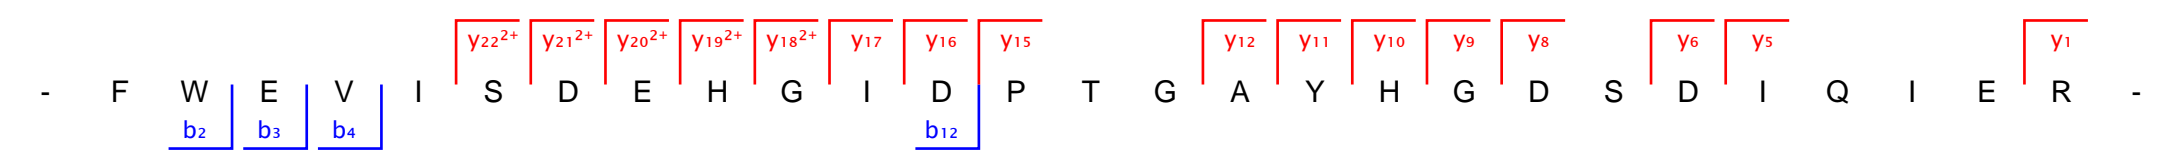

Raw file: 2015-01-05\_CL02\_2Excl15sMaxInj70  
 Scan: 13744 Method: ITMS; HCD Score: 52.67 m/z: 772.36

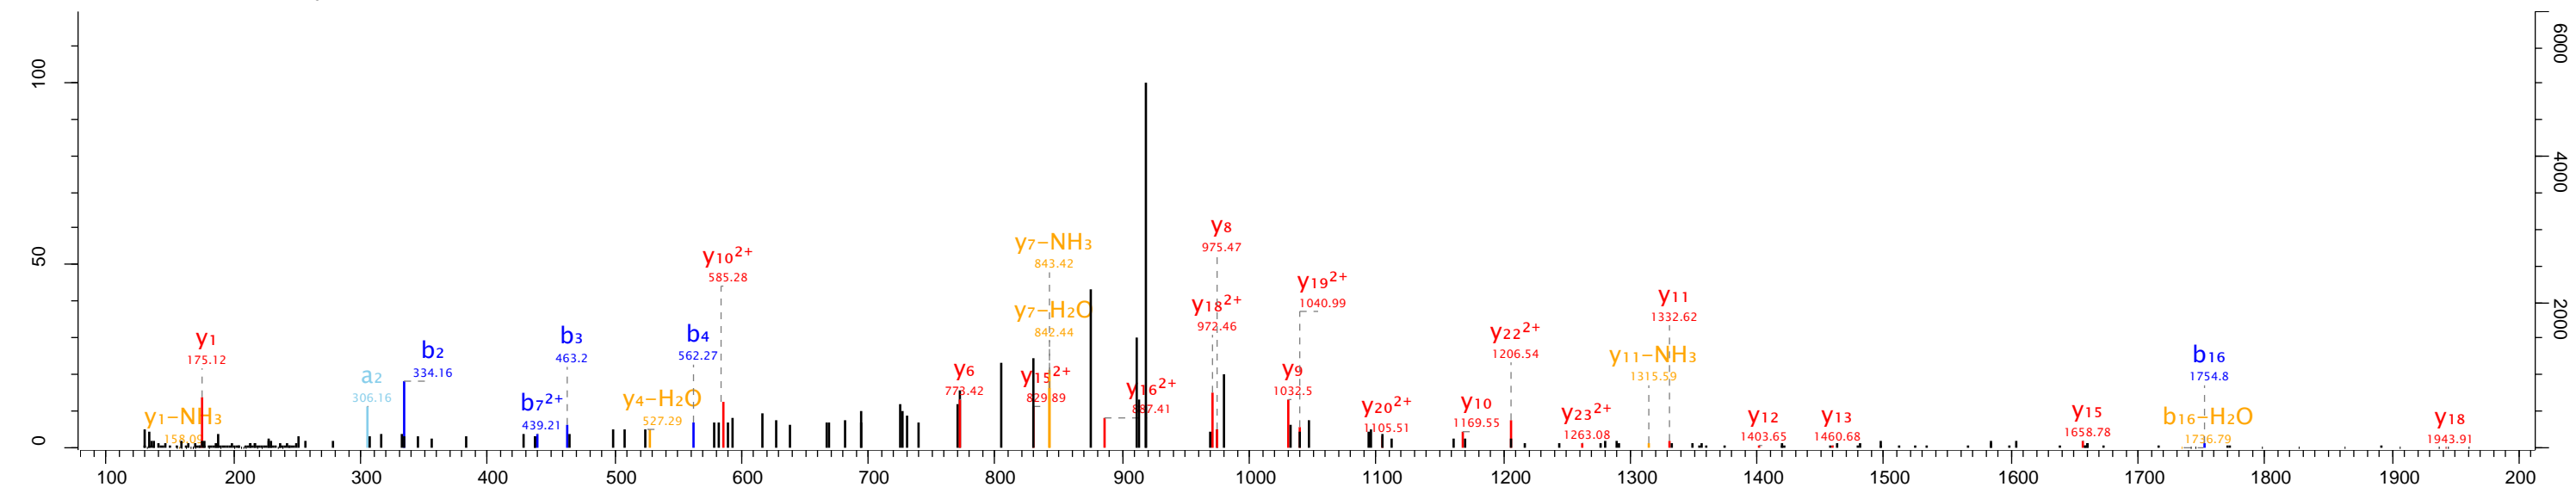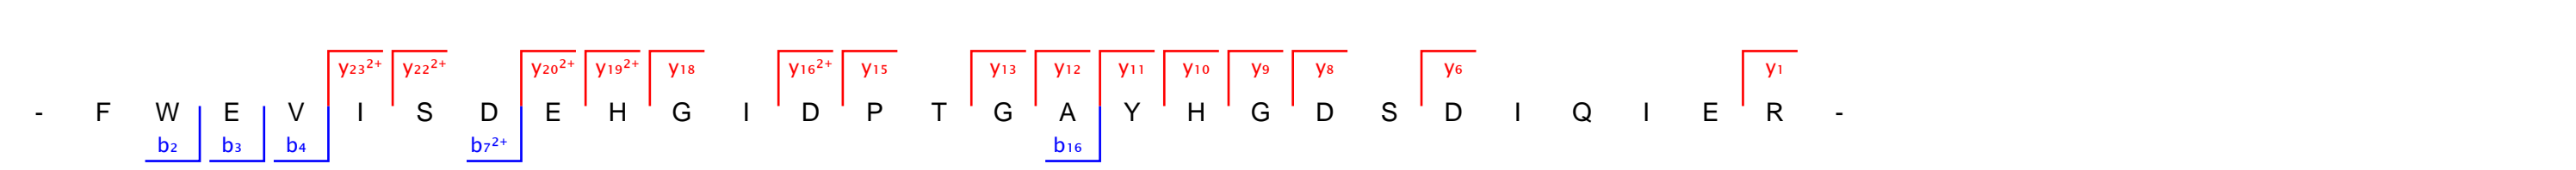

Raw file: 2015-01-05\_CL02\_2Excl15sMaxInj70  
 Scan: 13805 Method: ITMS; HCD Score: 107.36 m/z: 756.65

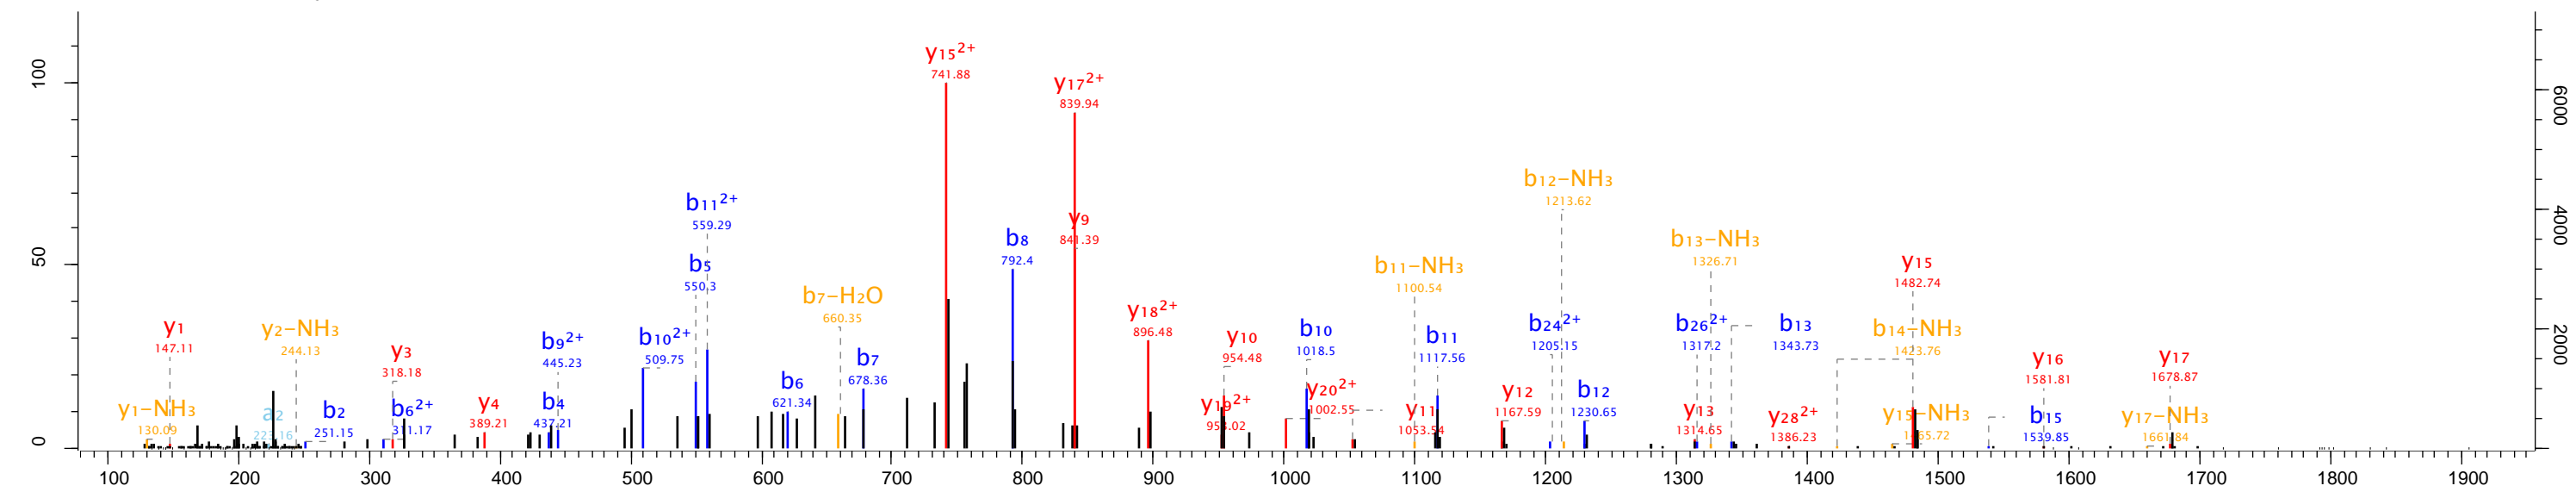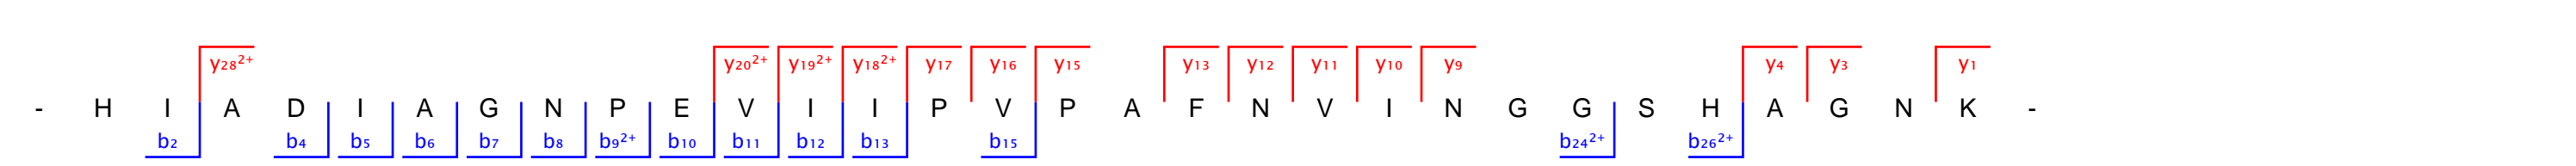

Spectral Annotation for Single-Peptide IDs in 16-cell Embryo using Q-OT-LIT

Raw file 2015-01-05\_CL02\_2Excl15sMaxInj70 Scan 13895 Method ITMS; HCD Score 130.51 m/z 756.4

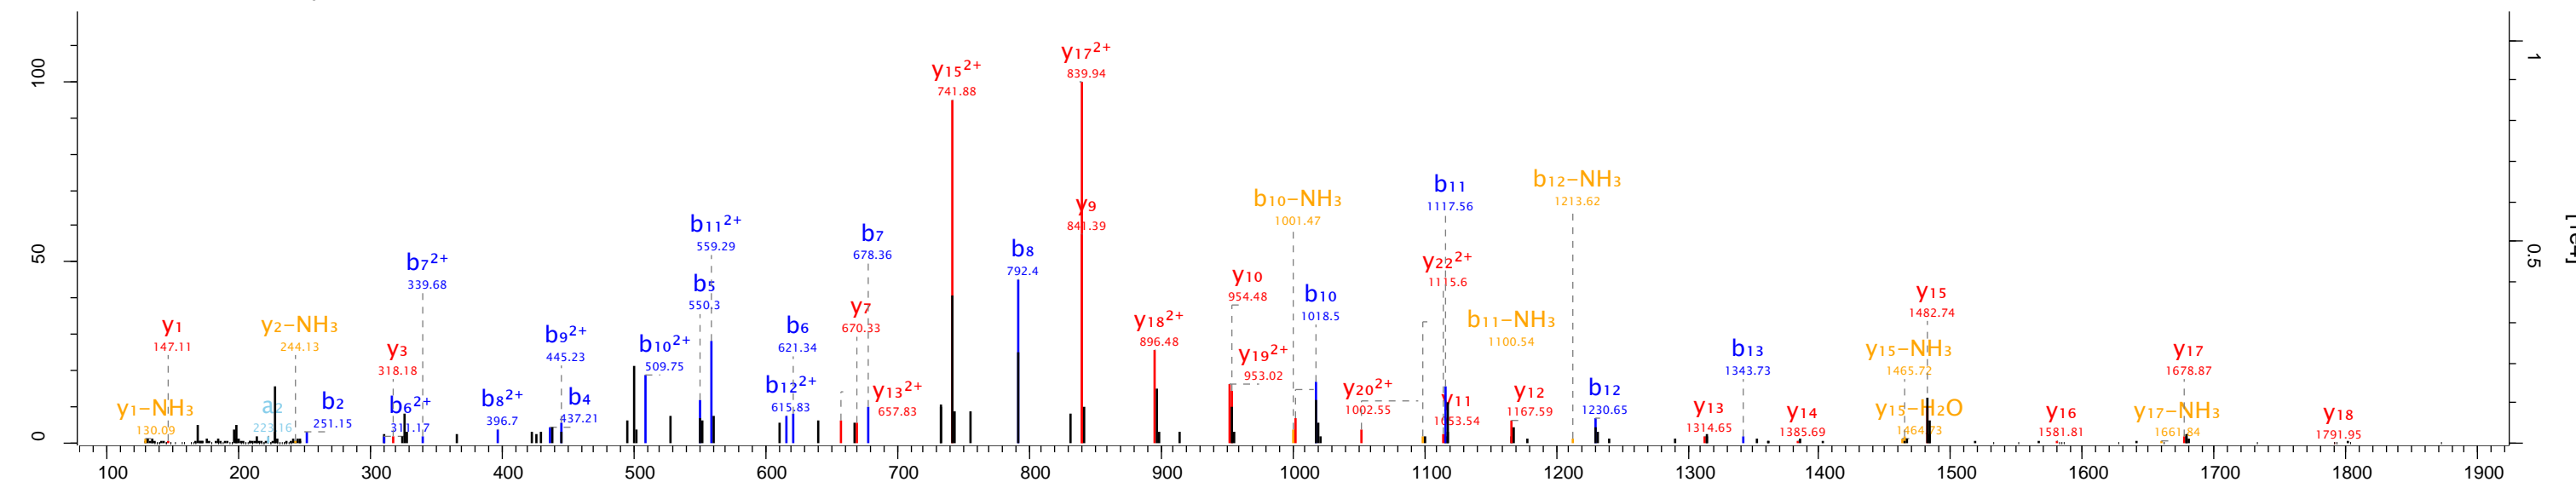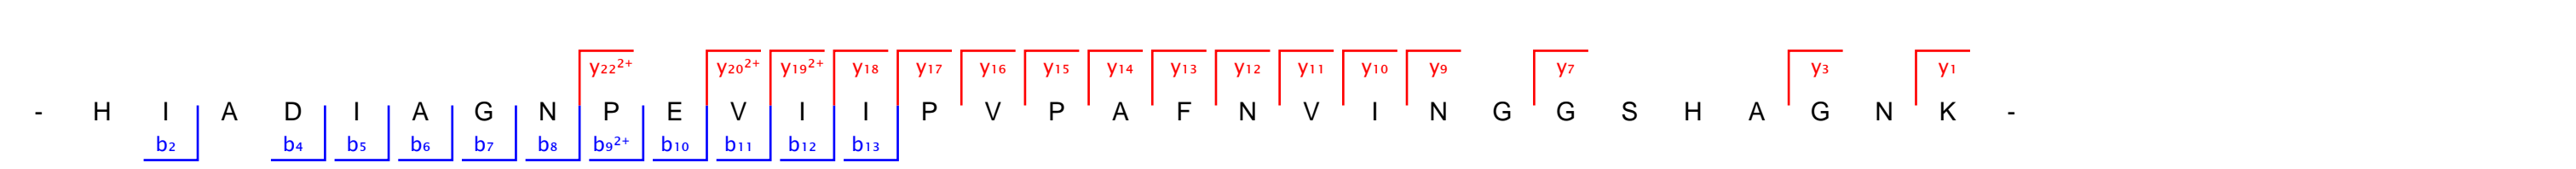

Spectral Annotation for Single-Peptide IDs in 16-cell Embryo using Q-OT-LIT

Raw file: 2015-01-05\_CL02\_2Excl15sMaxInj70  
 Scan: 13899 Method: ITMS; HCD Score: 115.71 m/z: 518.77

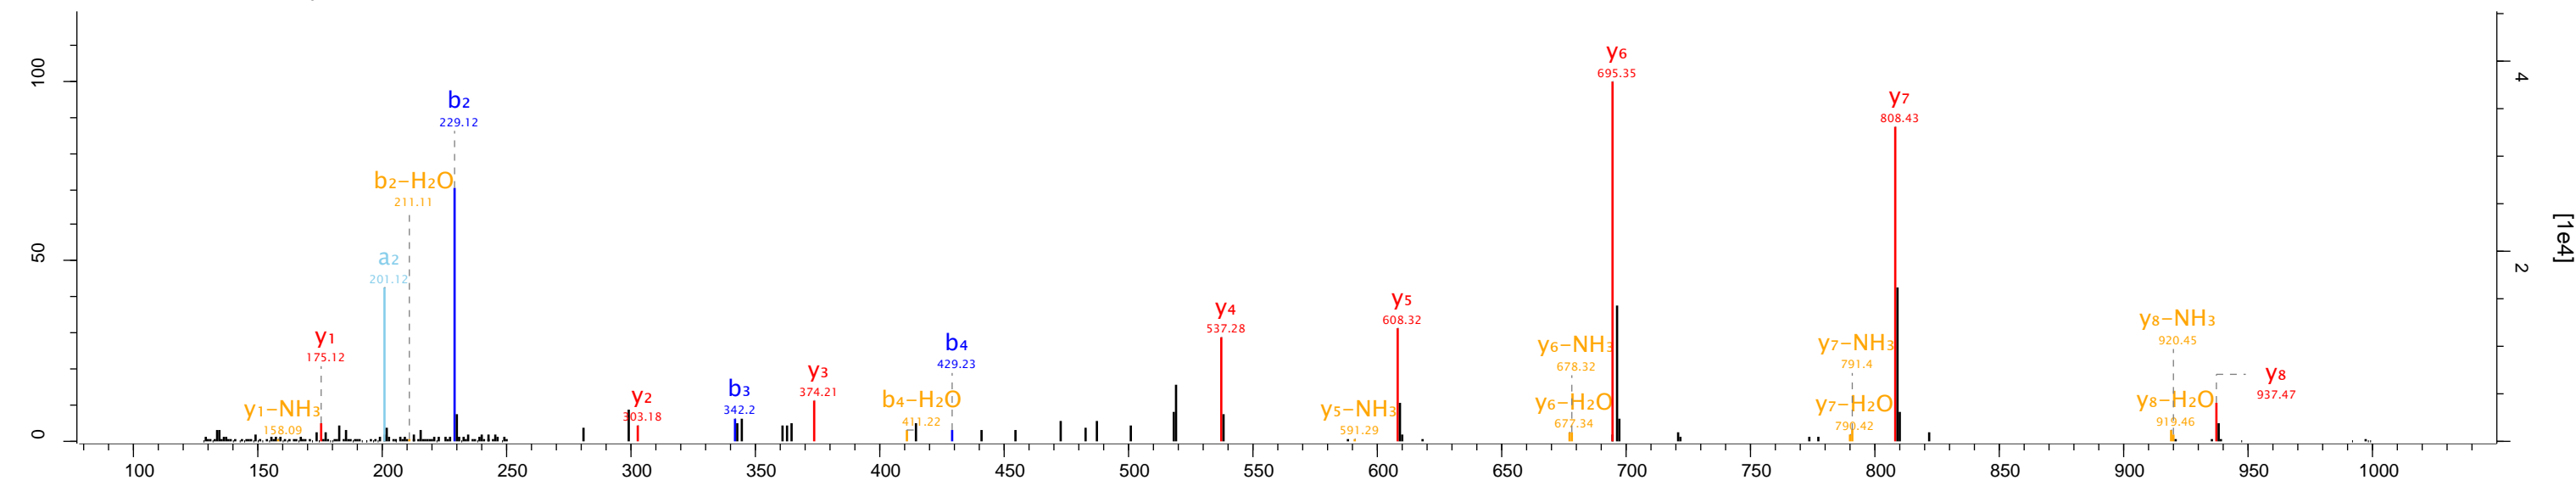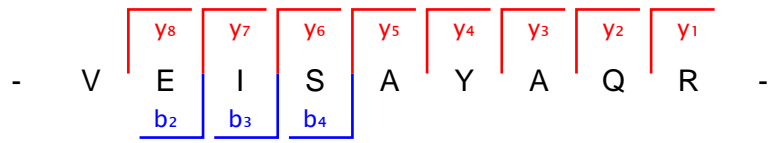

Raw file: 2015-01-05\_CL02\_2Excl15sMaxInj70  
 Scan: 14032 Method: ITMS; HCD Score: 52.87 m/z: 676.68

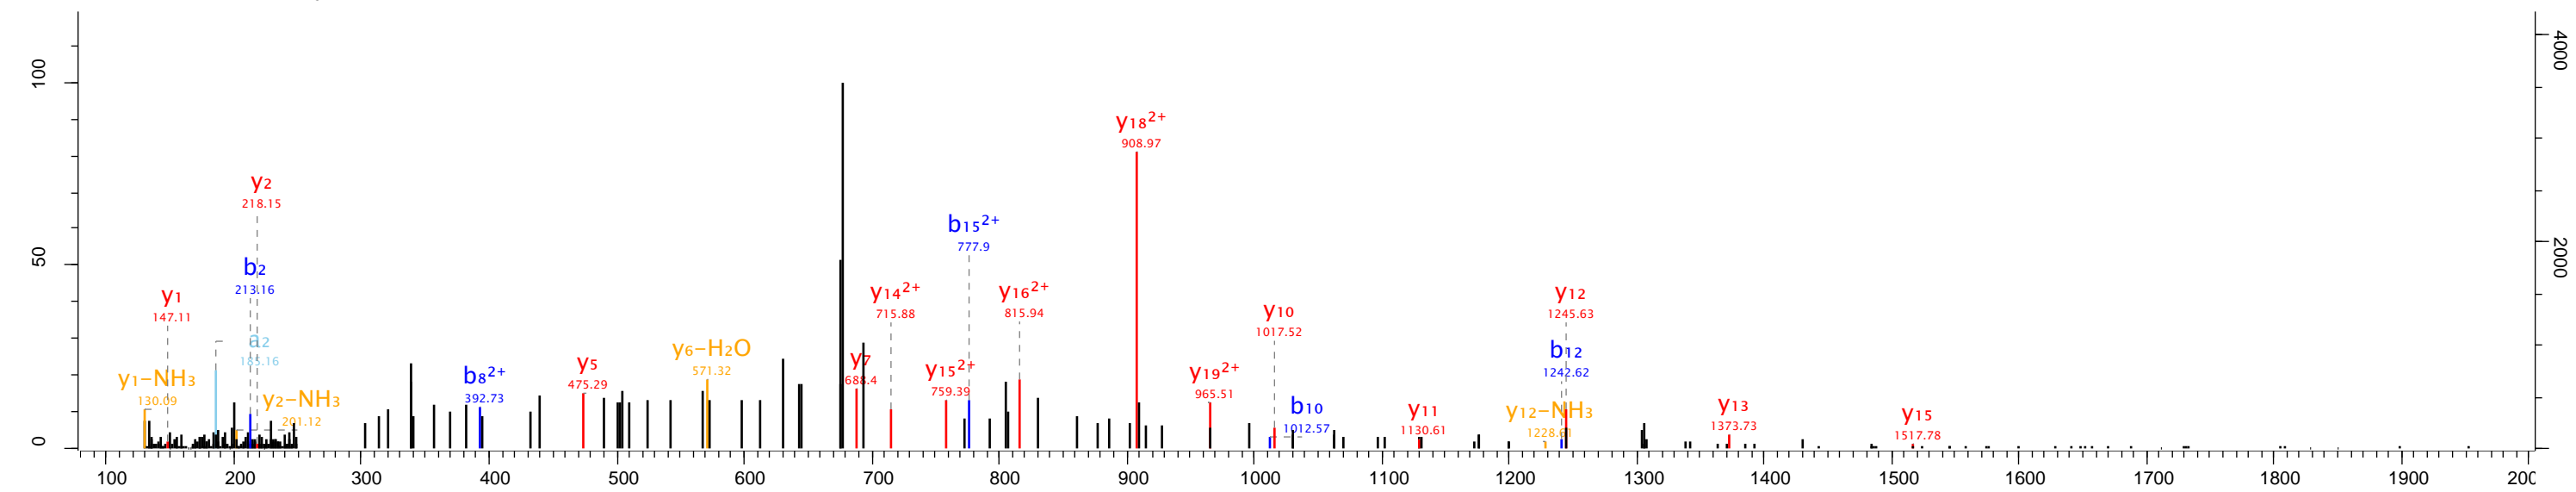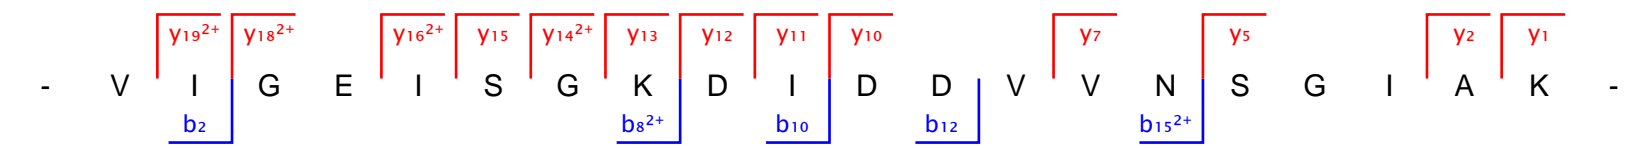

Spectral Annotation for Single-Peptide IDs in 16-cell Embryo using Q-OT-LIT

Raw file 2015-01-05\_CL02\_2Excl15sMaxInj70 Scan 14058 Method ITMS; HCD Score 86.18 m/z 677.36

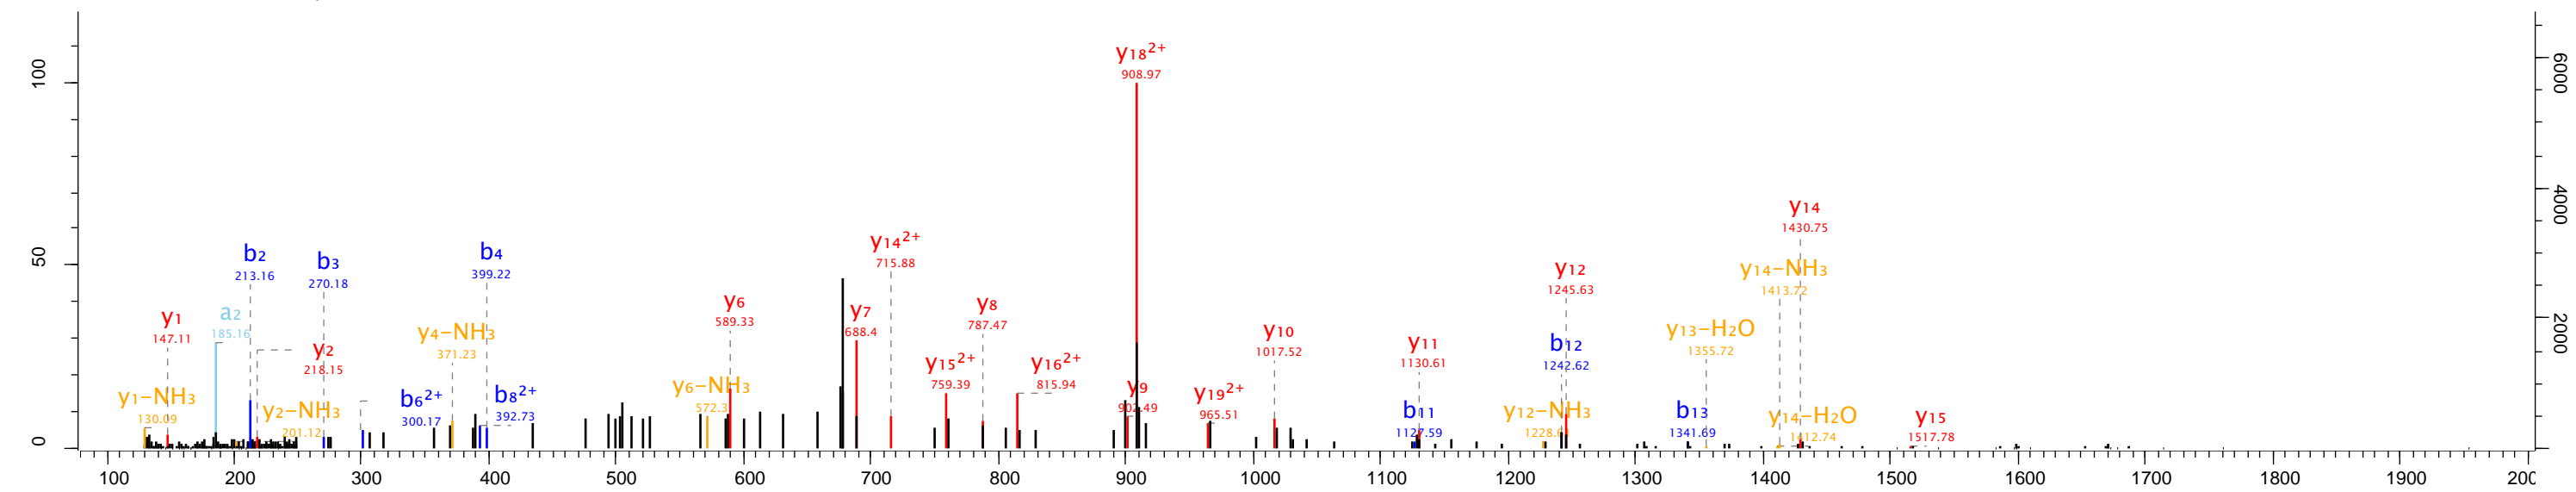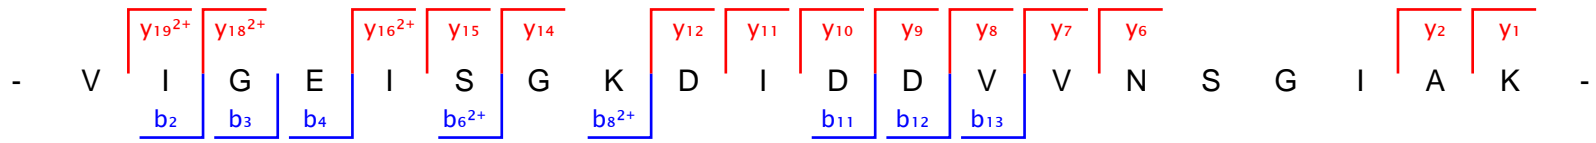

Spectral Annotation for Single-Peptide IDs in 16-cell Embryo using Q-OT-LIT

Raw file 2015-01-05\_CL02\_2Excl15sMaxInj70 Scan 14073 Method ITMS; HCD Score 38.59 m/z 756.4

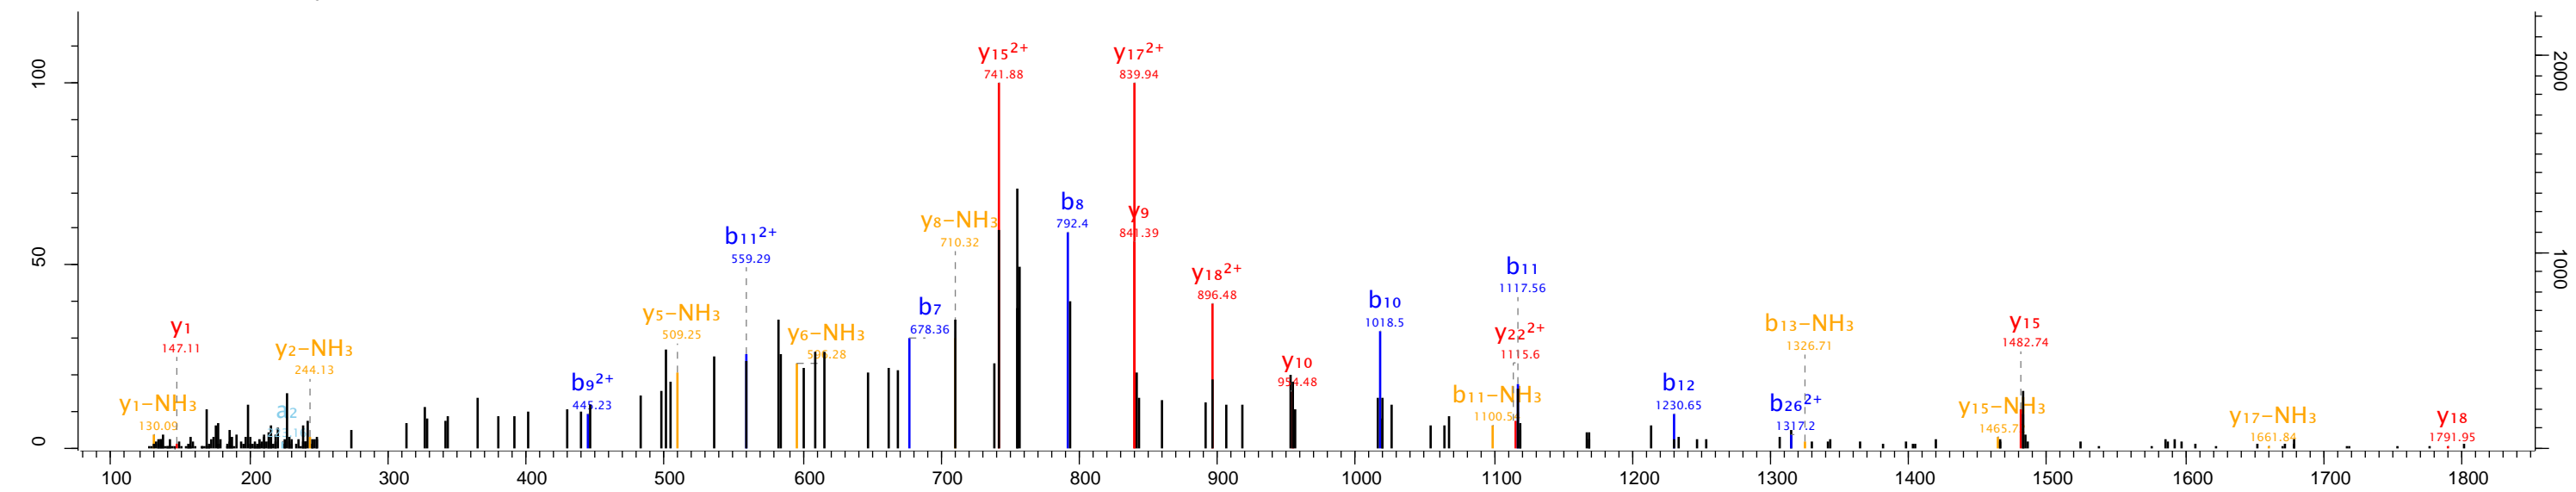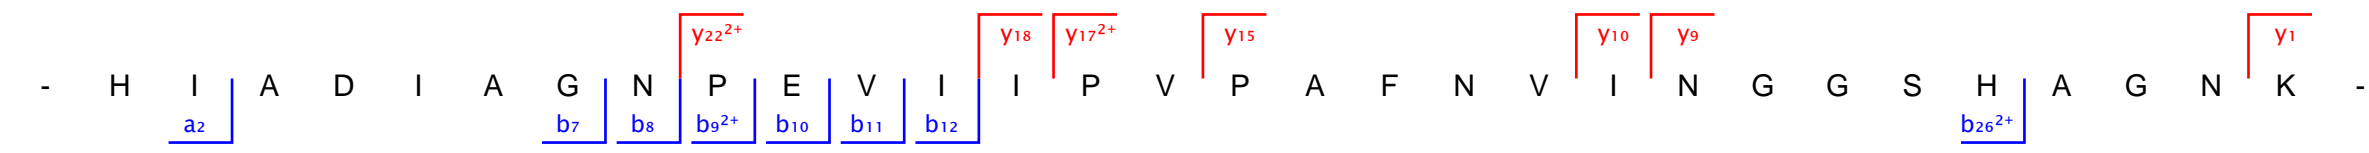



Raw file  
2015-01-05\_CL02\_2Excl15sMaxInj70

Scan 14164 Method ITMS; HCD Score 142.97 m/z 677.03

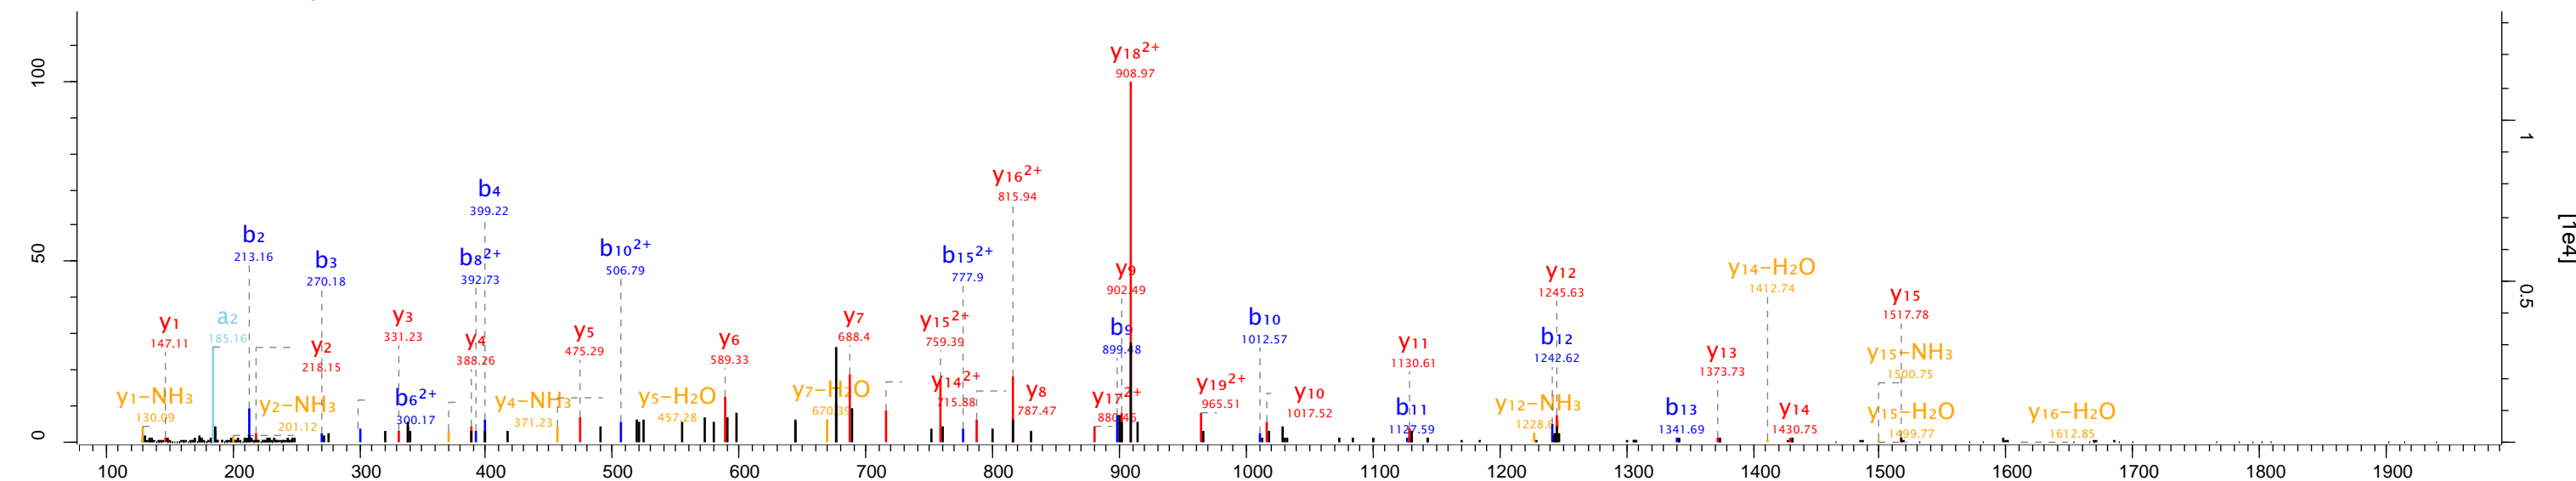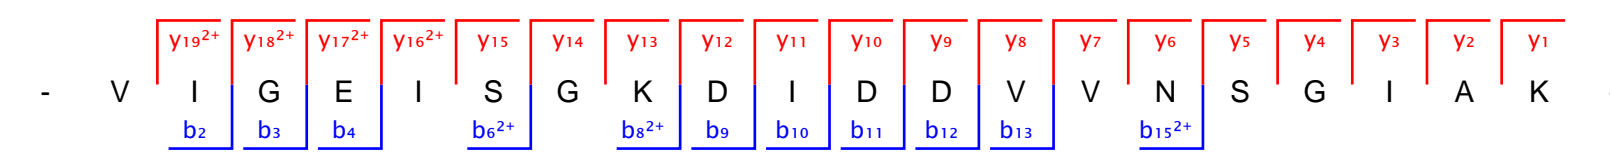

Raw file 2015-01-05\_CL02\_2Excl15sMaxInj70 Scan 14208 Method ITMS; HCD Score 115.7 m/z 513.31

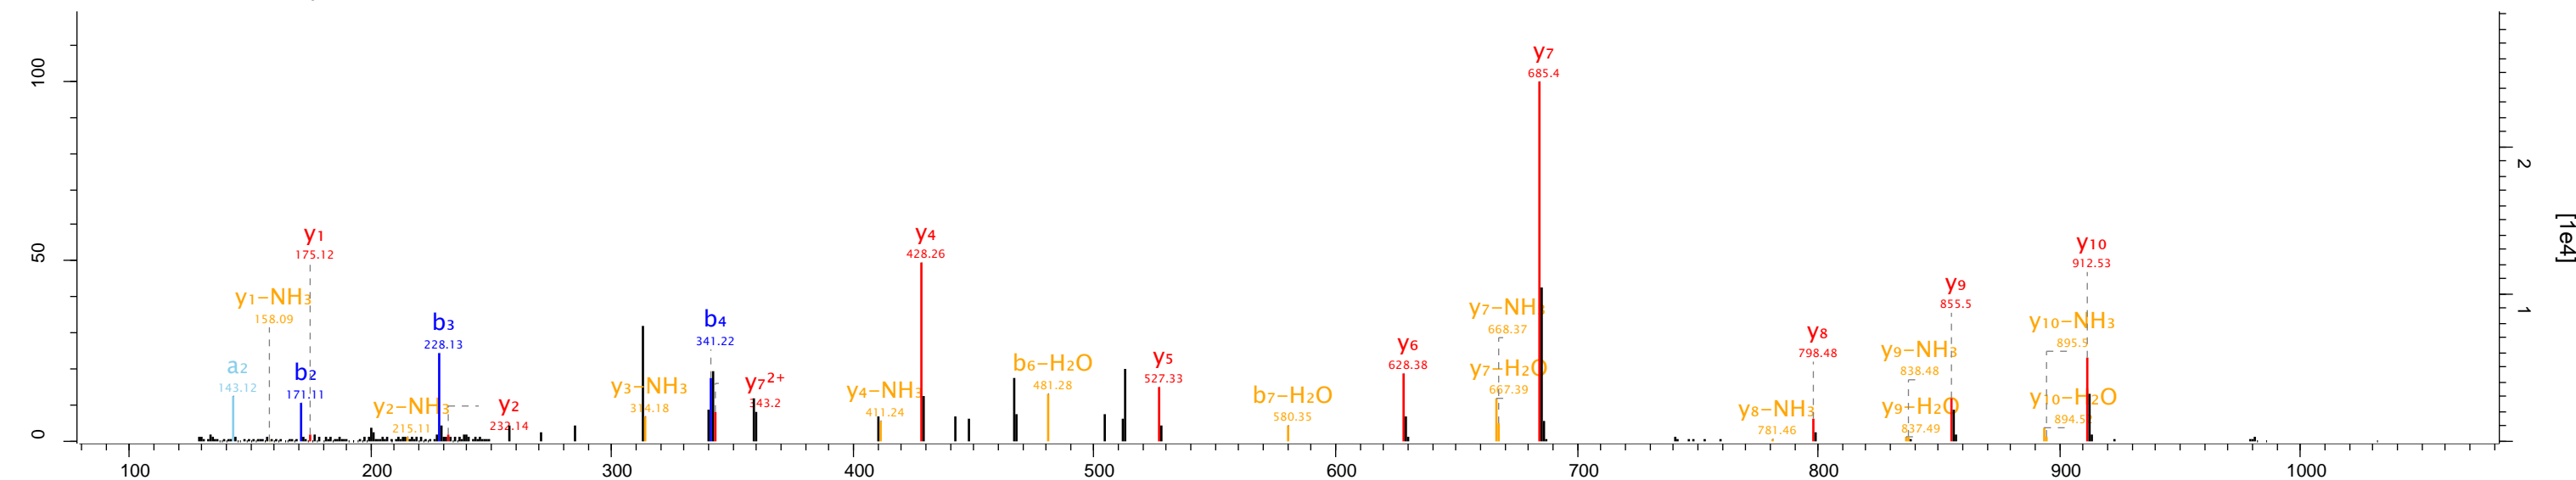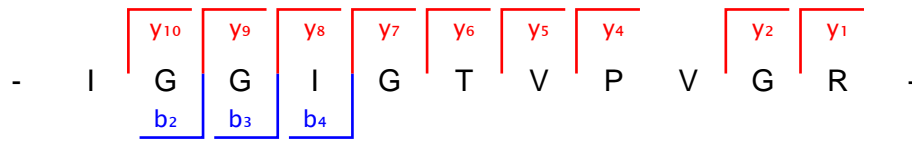

Raw file: 2015-01-05\_CL02\_2Excl15sMaxInj70  
 Scan: 14224 Method: ITMS; HCD Score: 70.4 m/z: 604.74

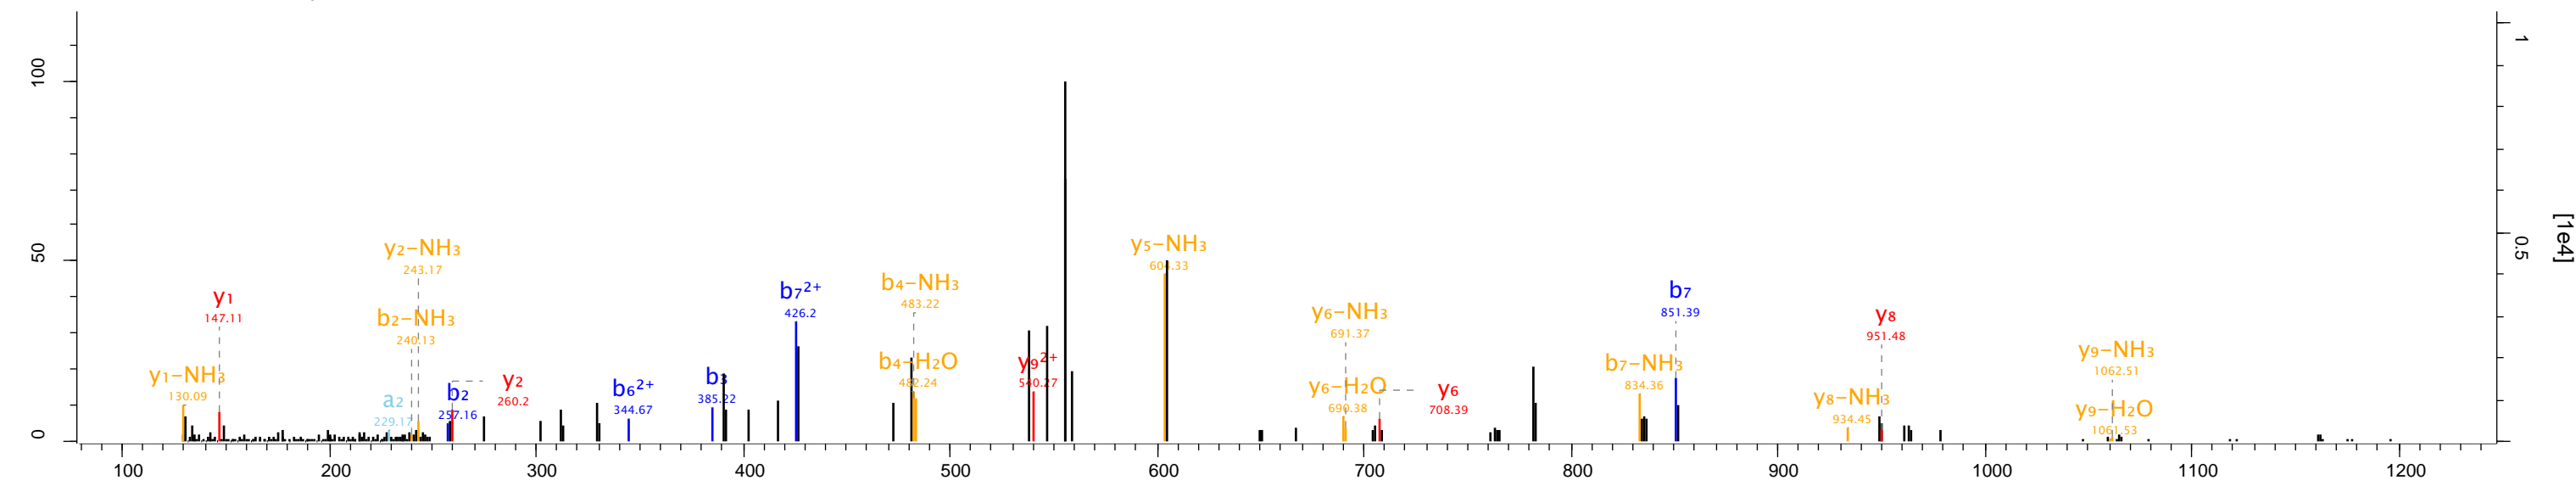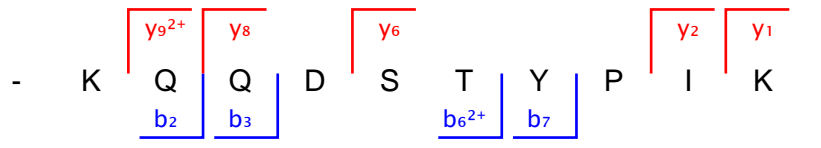

Spectral Annotation for Single-Peptide IDs in 16-cell Embryo using Q-OT-LIT

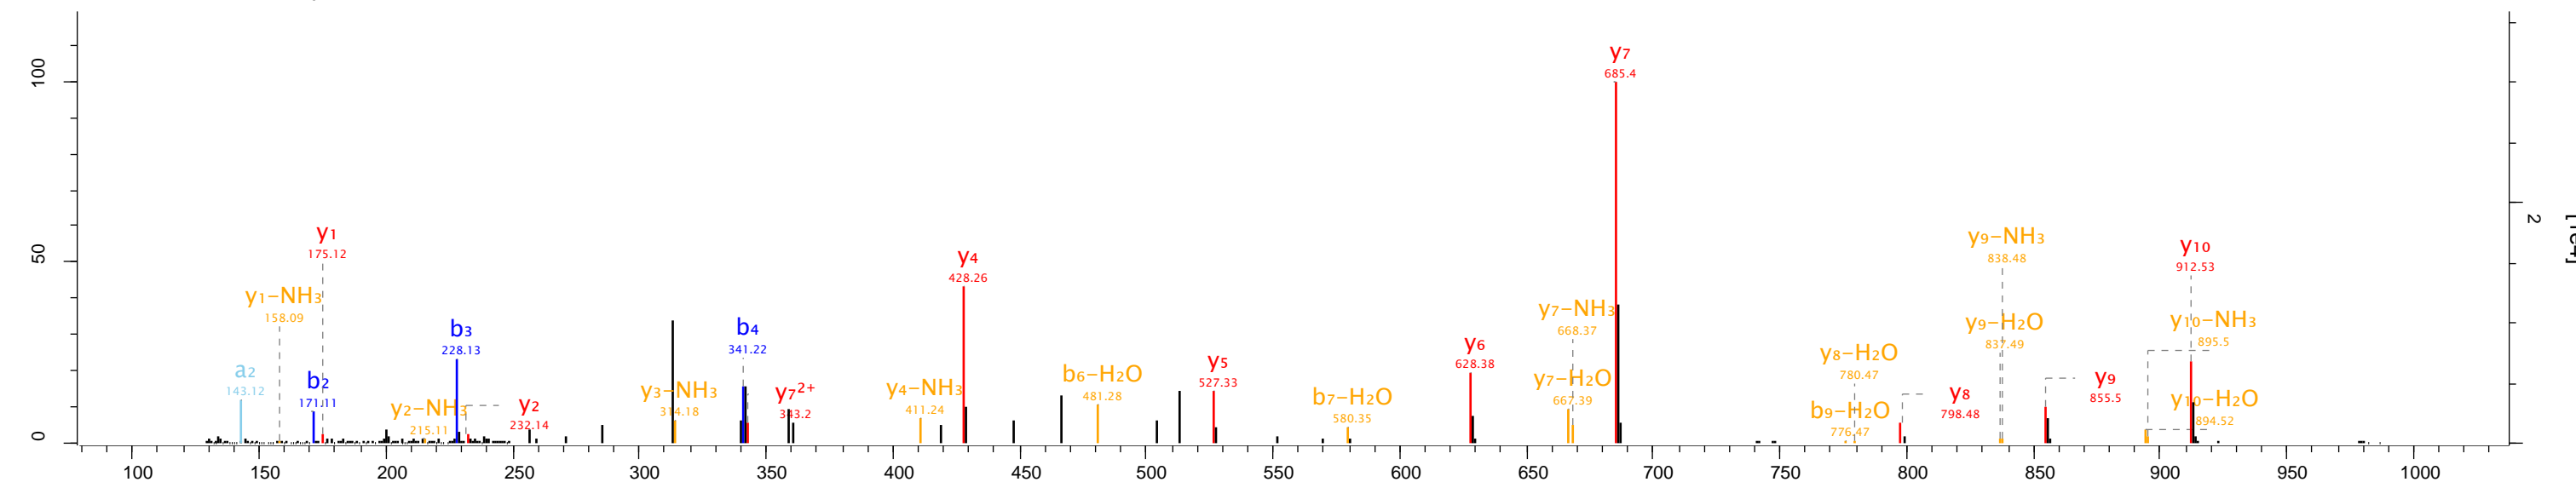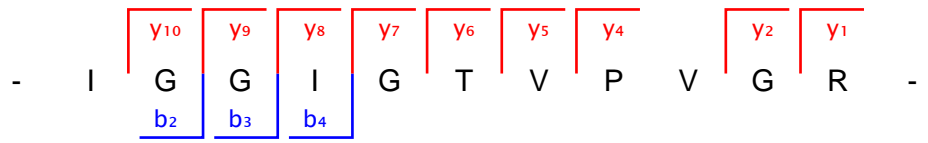

Raw file 2015-01-05\_CL02\_2Excl15sMaxInj70 Scan 14242 Method ITMS; HCD Score 103.31 m/z 513.31

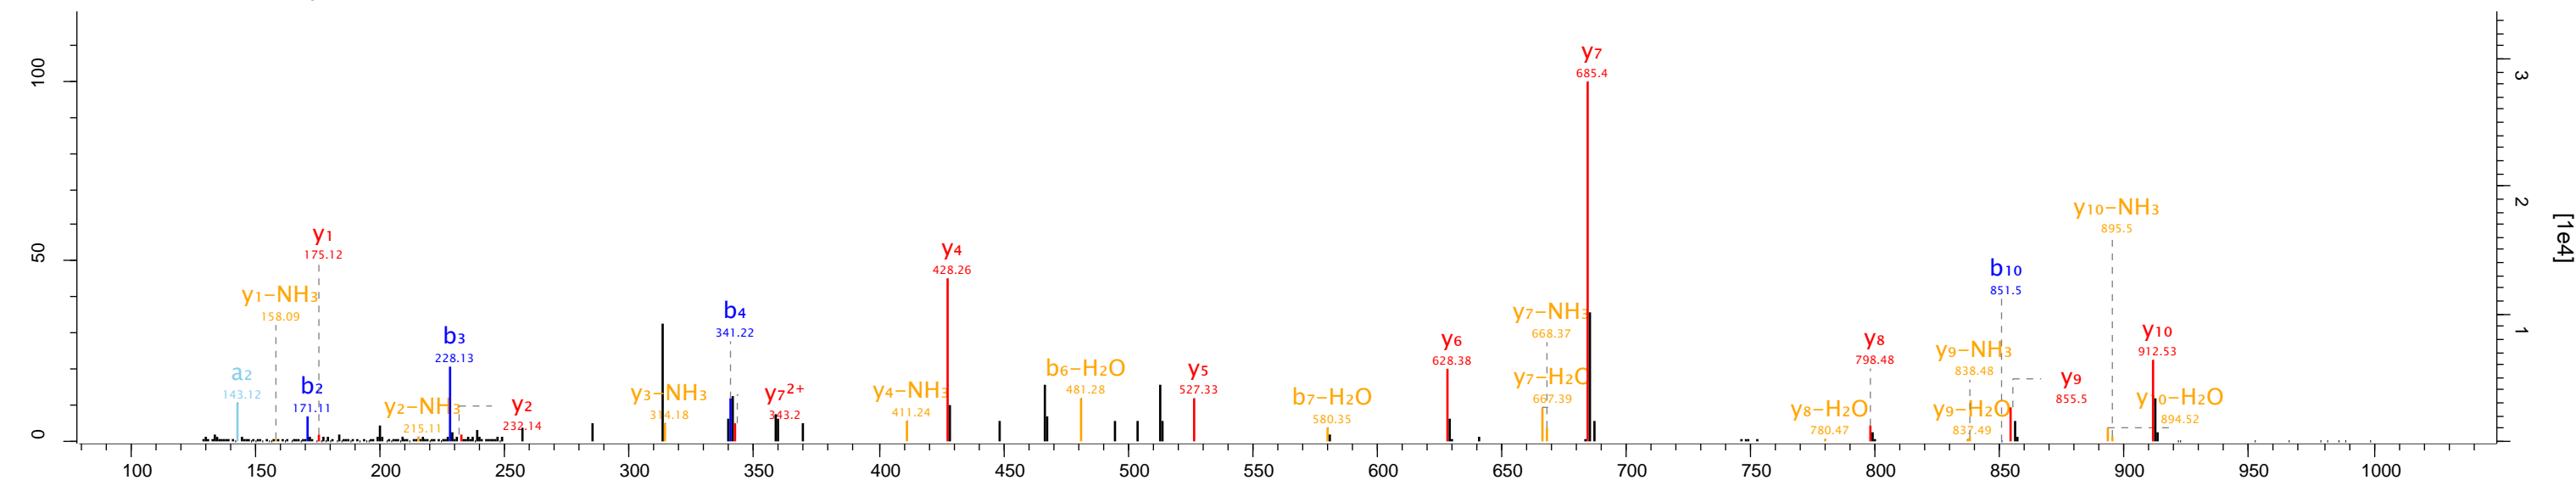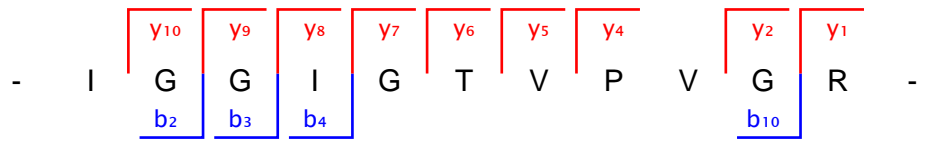

Spectral Annotation for Single-Peptide IDs in 16-cell Embryo using Q-OT-LIT

Raw file: 2015-01-05\_CL02\_2Excl15sMaxInj70  
 Scan: 14268 Method: ITMS; HCD Score: 115.23 m/z: 513.31

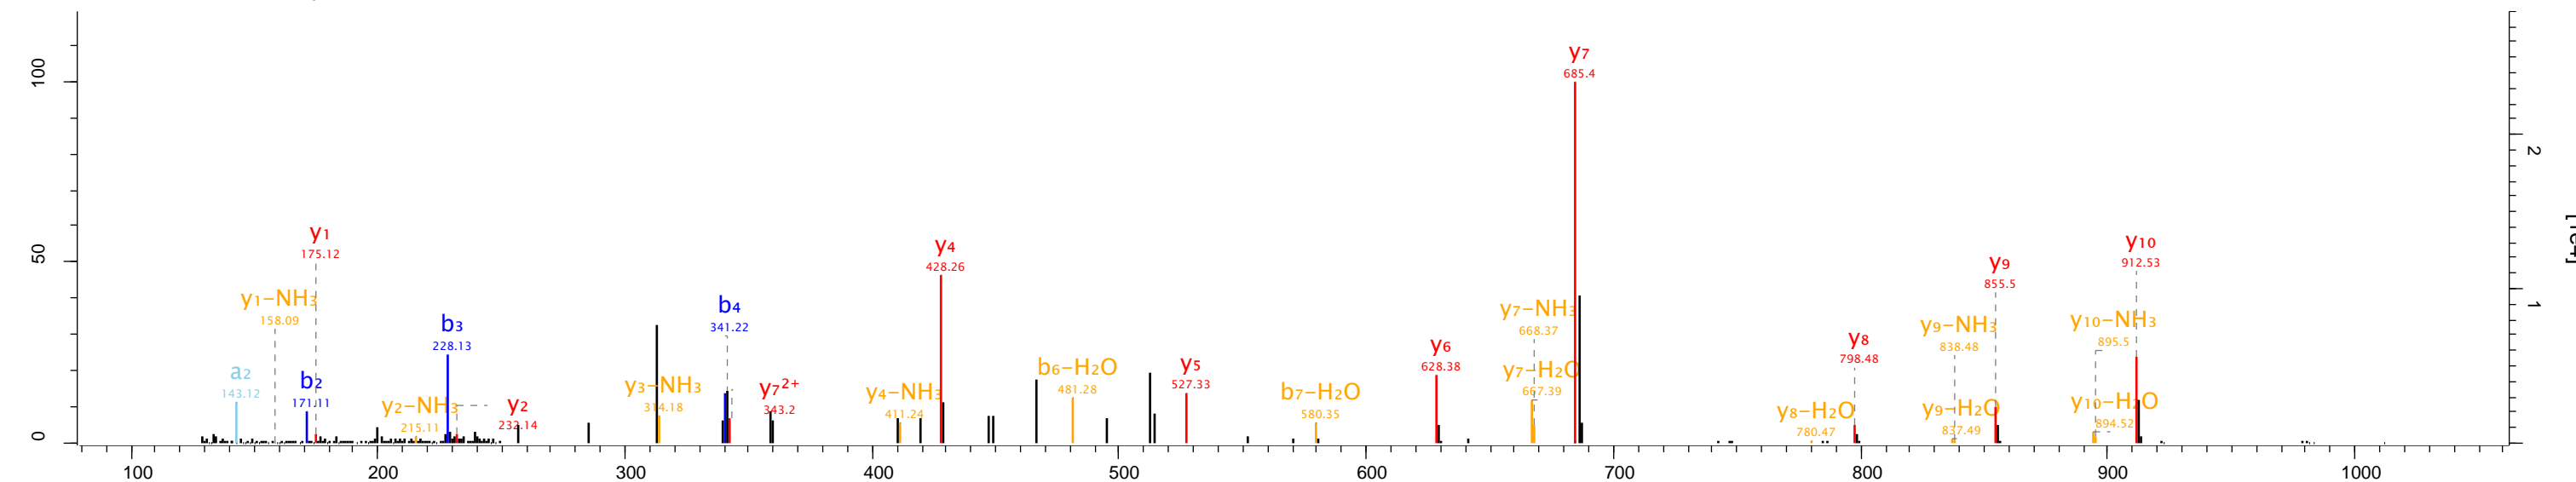

Spectral Annotation for Single-Peptide IDs in 16-cell Embryo using Q-OT-LIT

Raw file Scan Method Score m/z  
 2015-01-05\_CL02\_2Excl15sMaxInj70 14278 ITMS; HCD 56.08 712.06

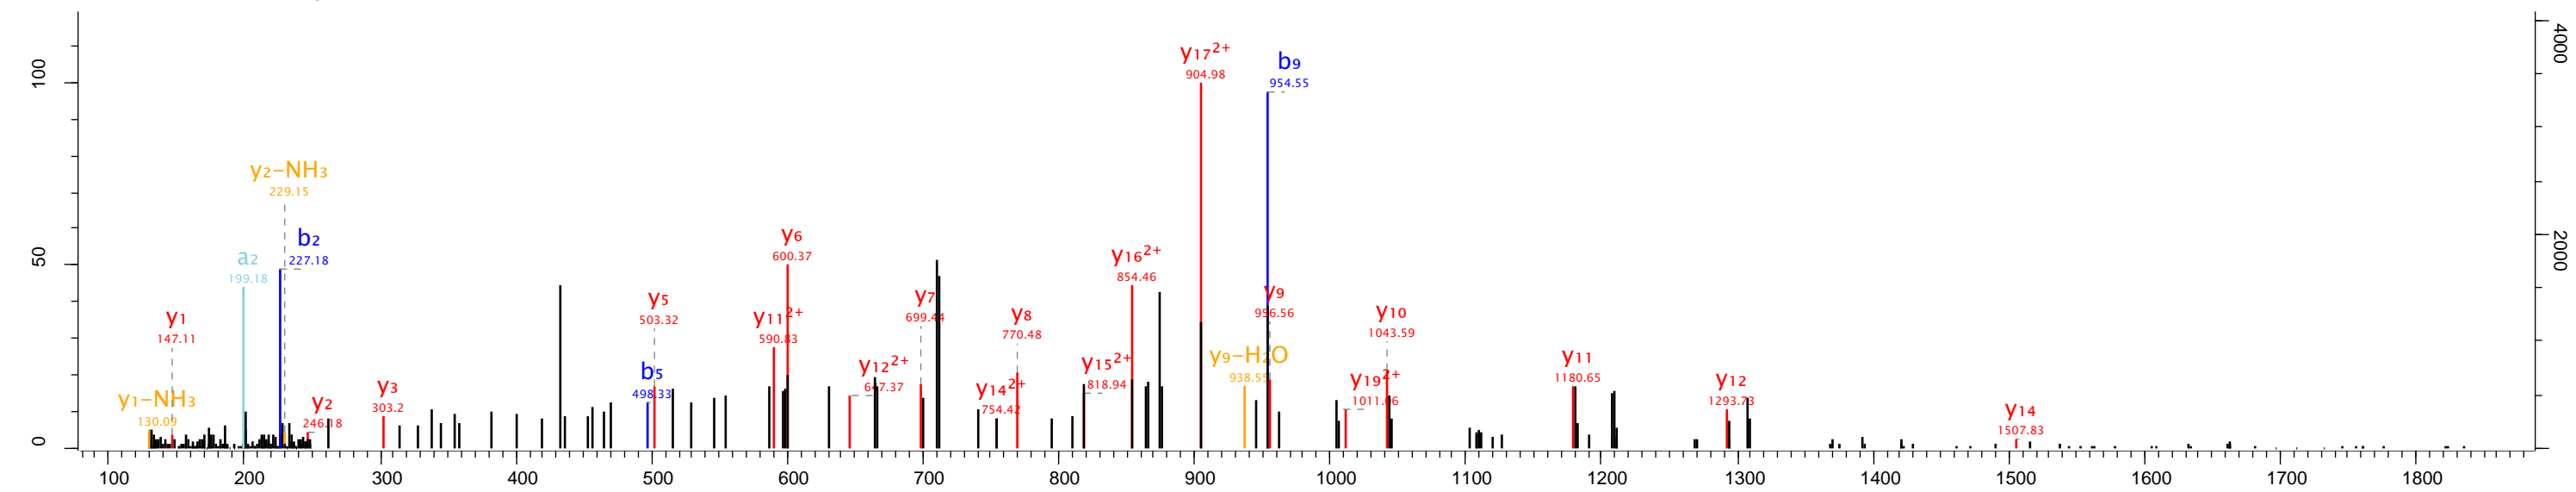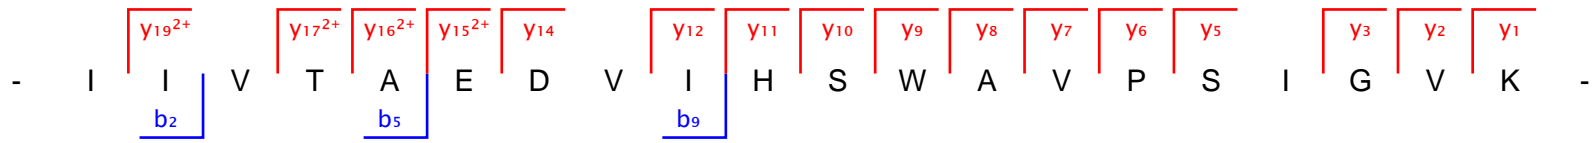

Spectral Annotation for Single-Peptide IDs in 16-cell Embryo using Q-OT-LIT

Raw file 2015-01-05\_CL02\_2Excl15sMaxInj70 Scan 14306 Method ITMS; HCD Score 80.54 m/z 712.4

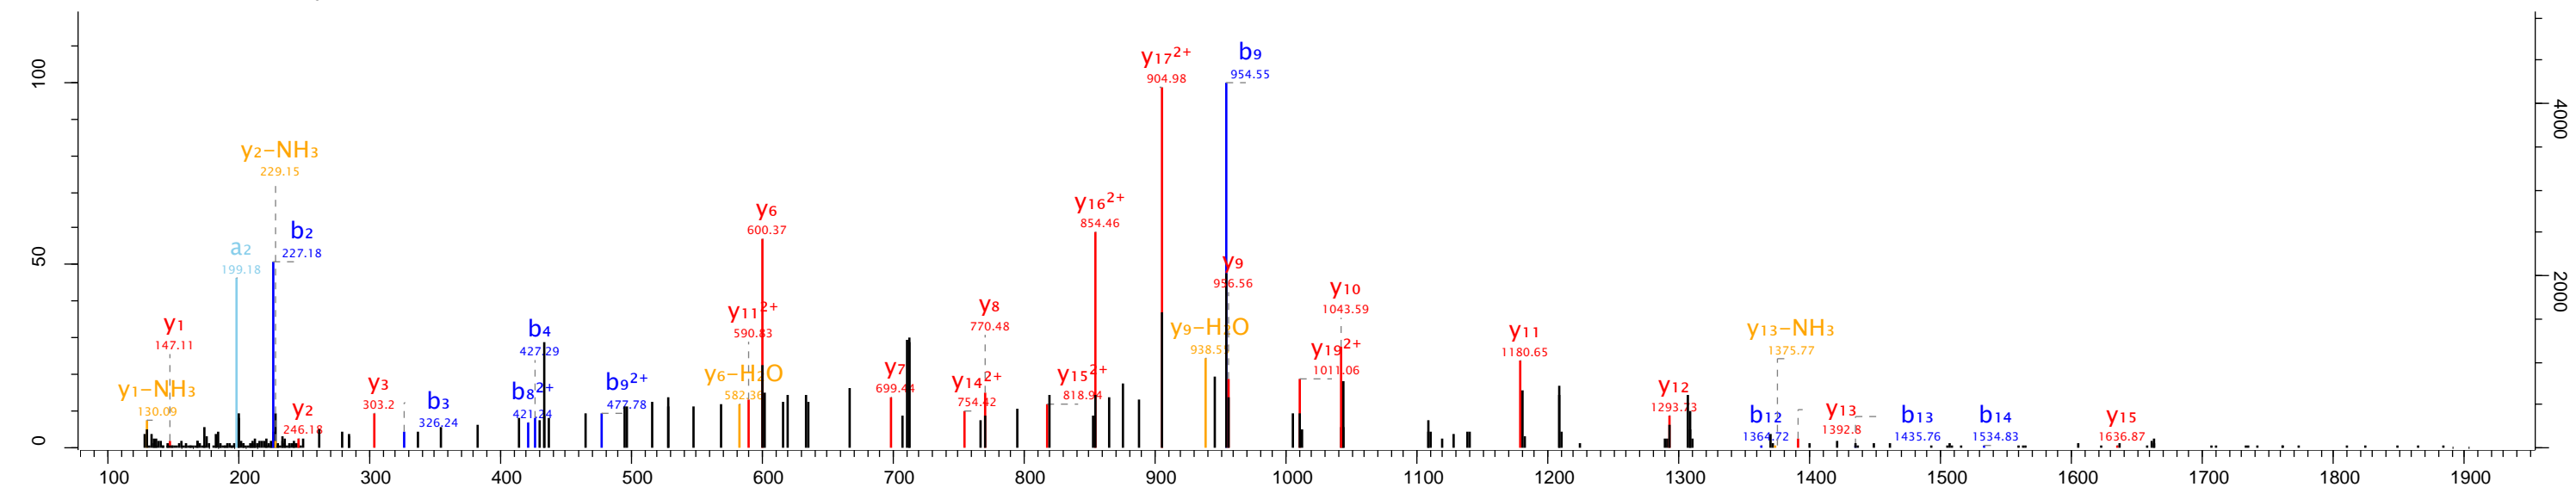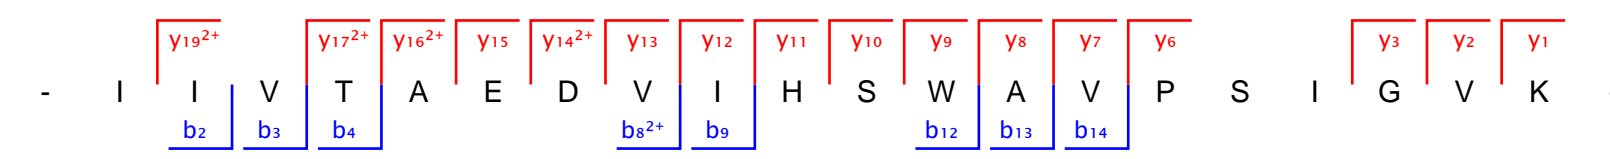

Spectral Annotation for Single-Peptide IDs in 16-cell Embryo using Q-OT-LIT



Raw file 2015-01-05\_CL02\_2Excl15sMaxInj70 Scan 14335 Method ITMS; HCD Score 48.22 m/z 675.31

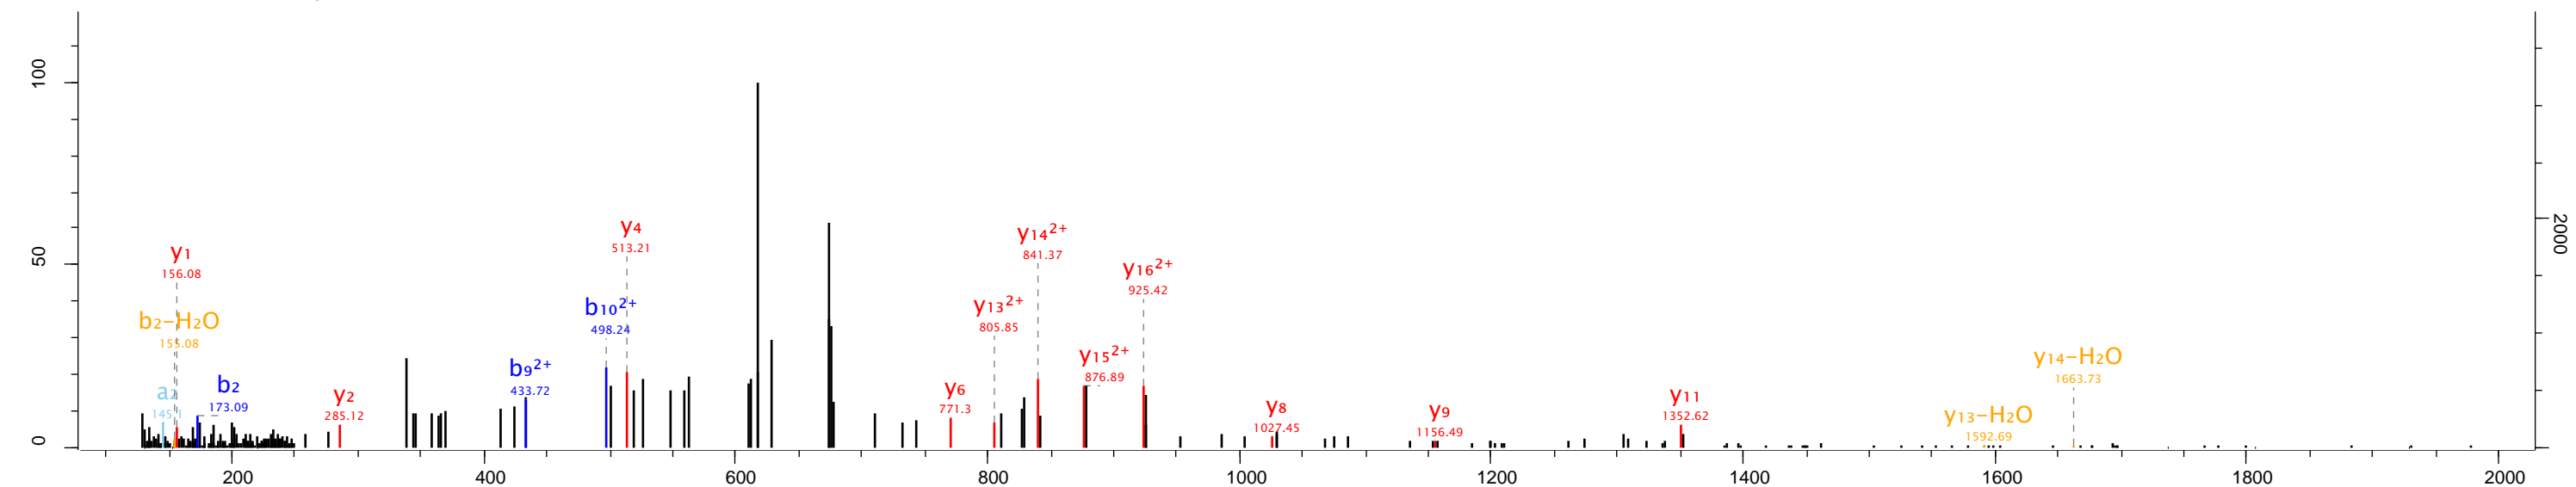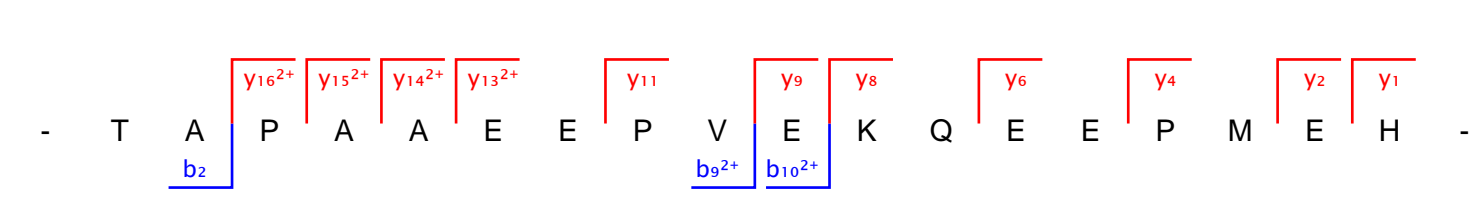

Raw file: 2015-01-05\_CL02\_2Excl15sMaxInj70  
 Scan: 14358 Method: ITMS; HCD Score: 39.26 m/z: 674.64

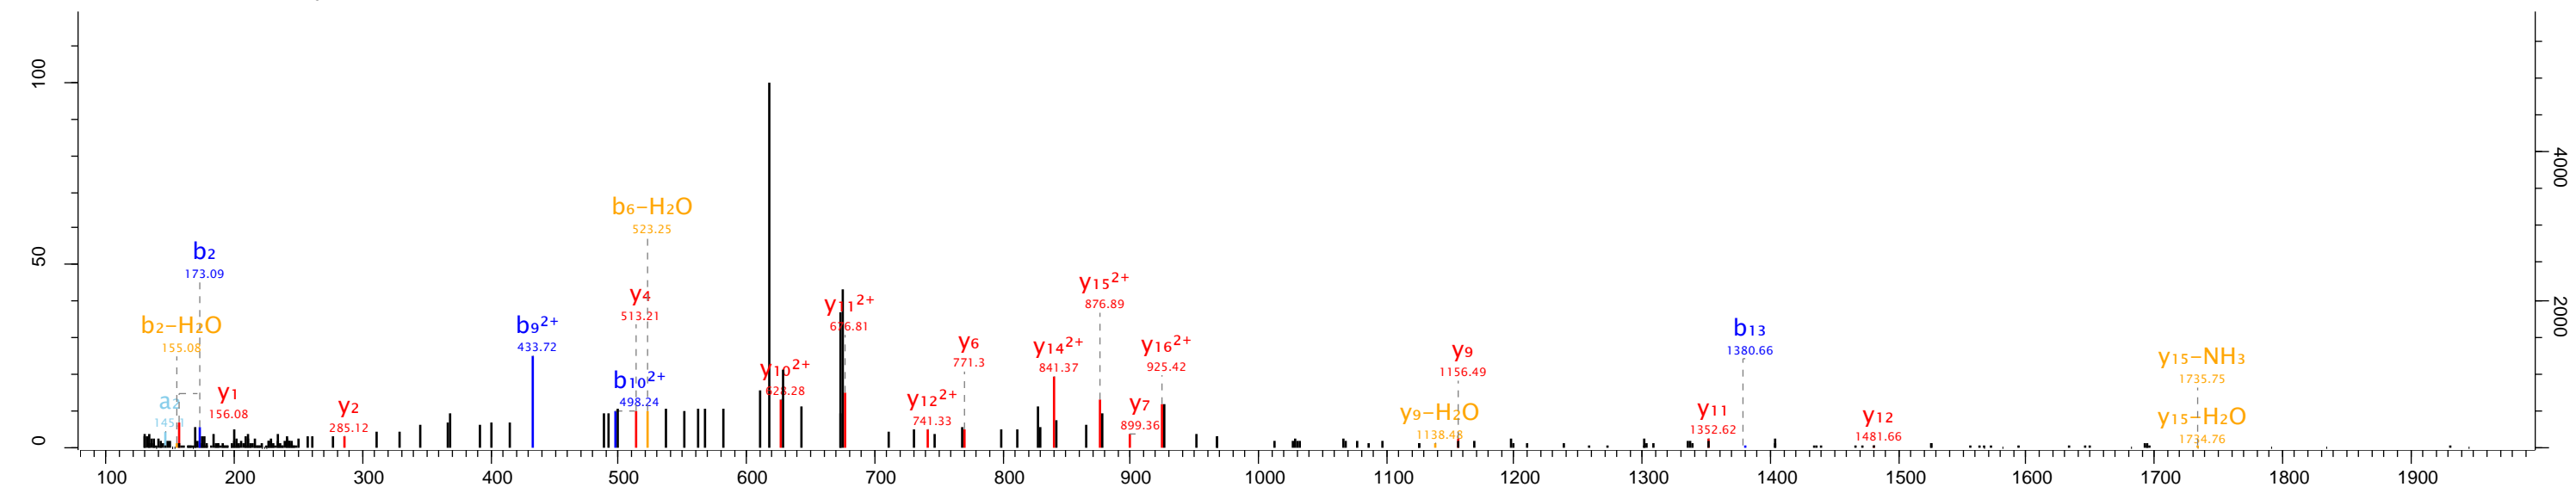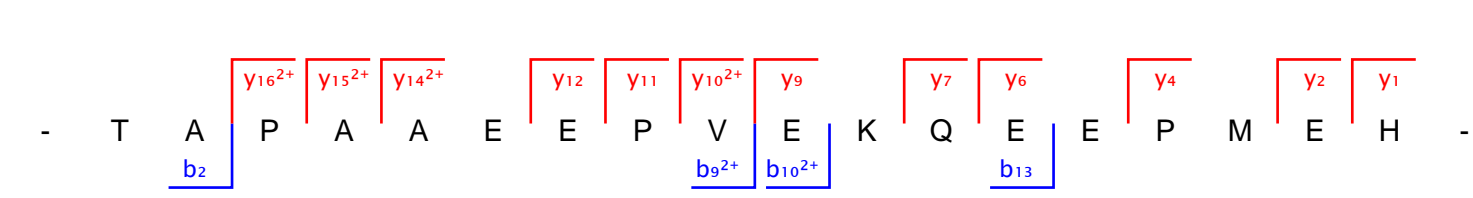

Spectral Annotation for Single-Peptide IDs in 16-cell Embryo using Q-OT-LIT

Raw file 2015-01-05\_CL02\_2Excl15sMaxInj70 Scan 14365 Method ITMS; HCD Score 86.45 m/z 740.37

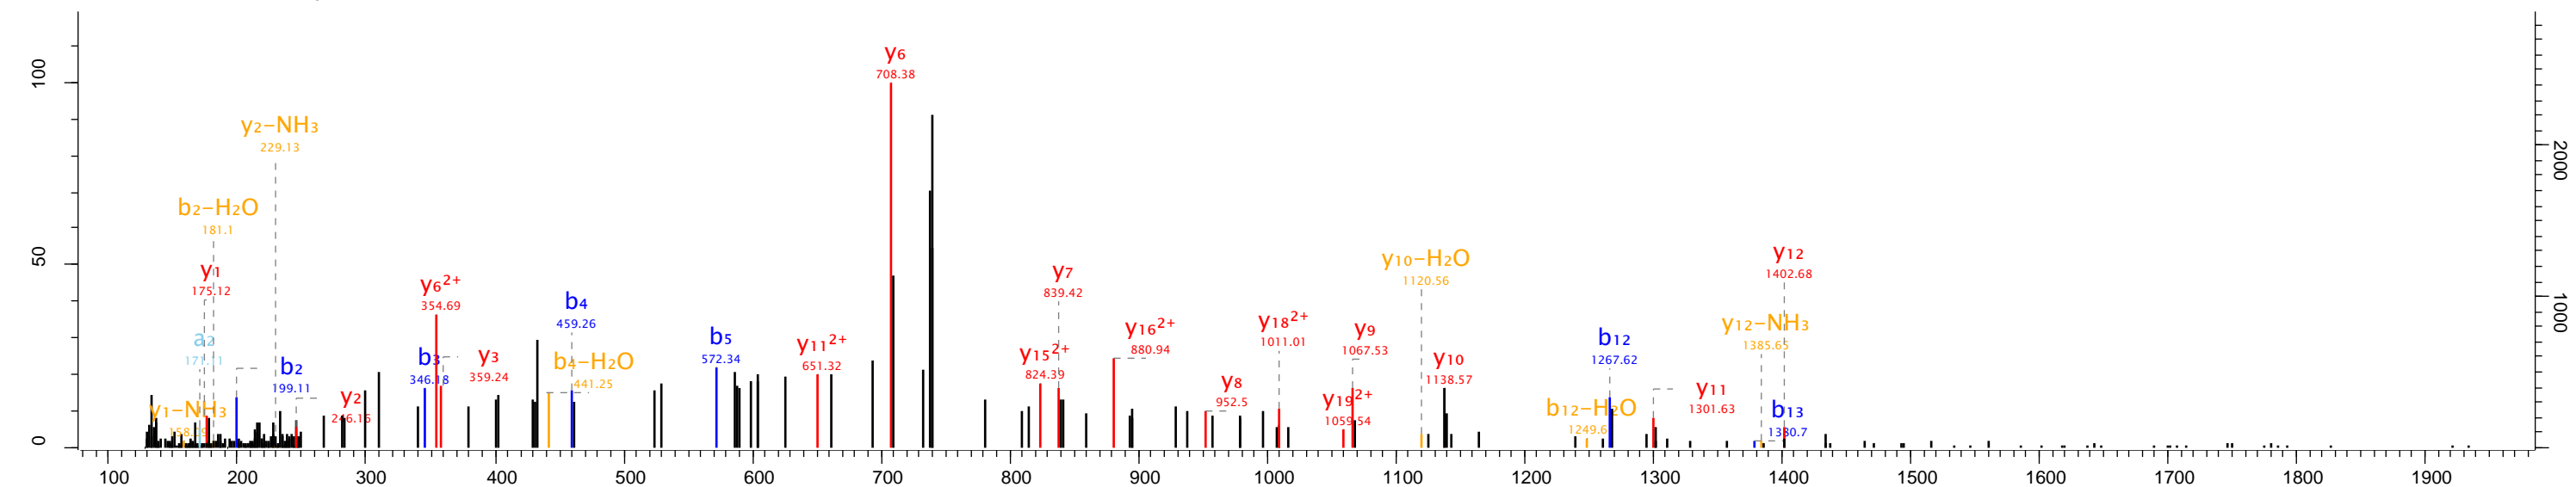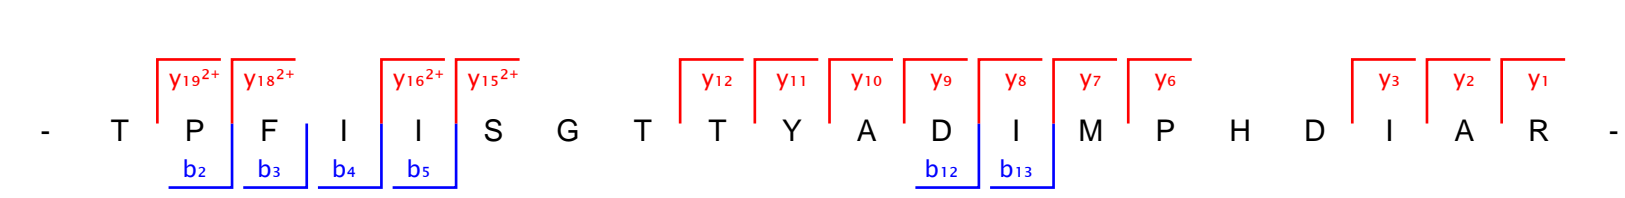

Spectral Annotation for Single-Peptide IDs in 16-cell Embryo using Q-OT-LIT

Raw file  
 2015-01-05\_CL02\_2Excl15sMaxInj70  
 Scan 14373 Method ITMS; HCD Score 58.66 m/z 675.31

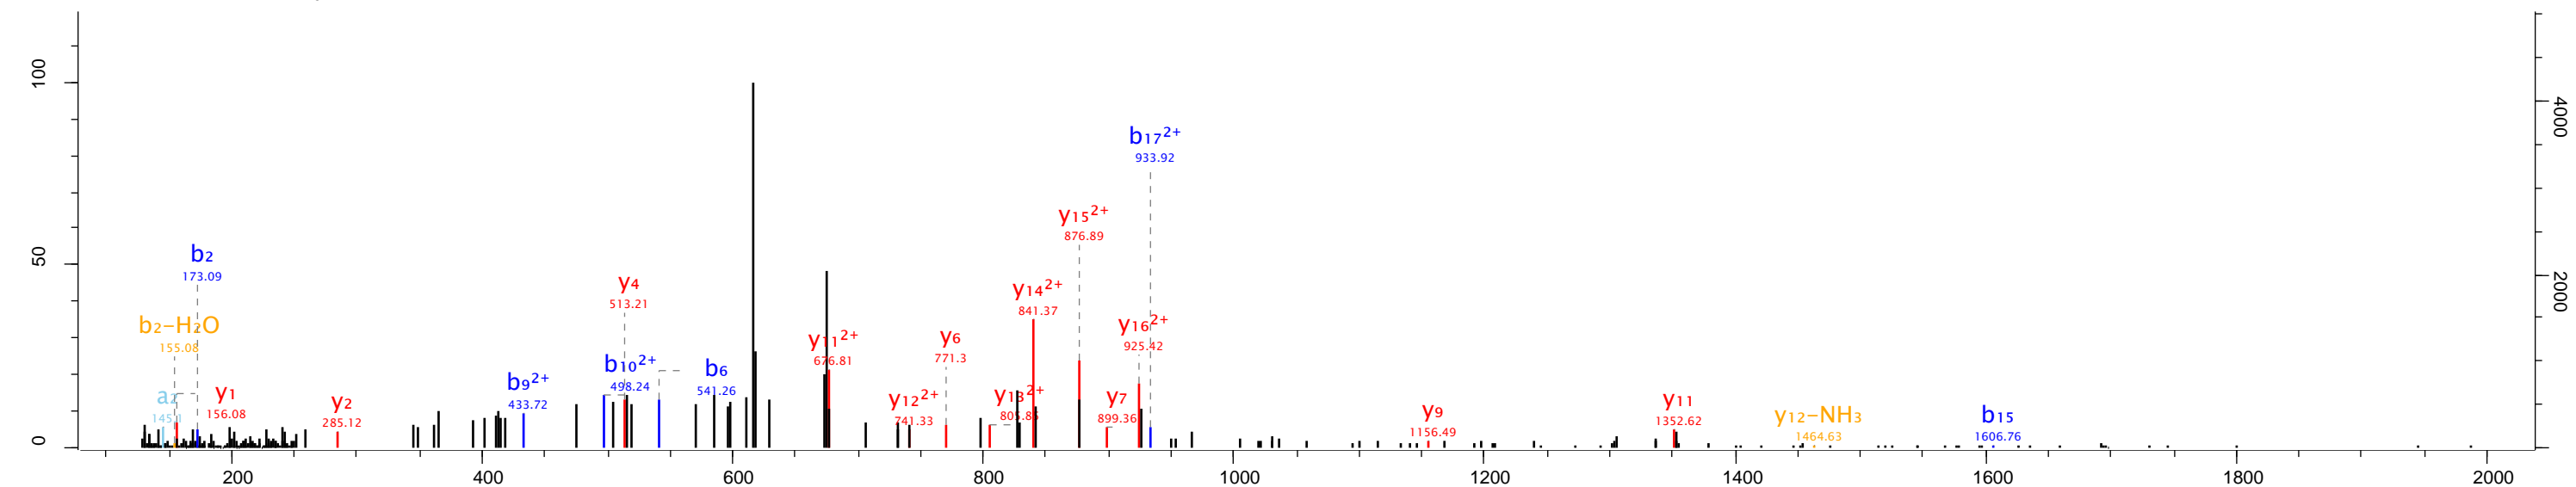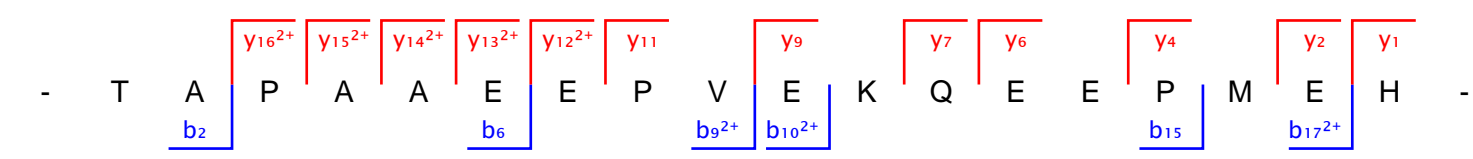

Raw file 2015-01-05\_CL02\_2Excl15sMaxInj70 Scan 14396 Method ITMS; HCD Score 41.7 m/z 674.64

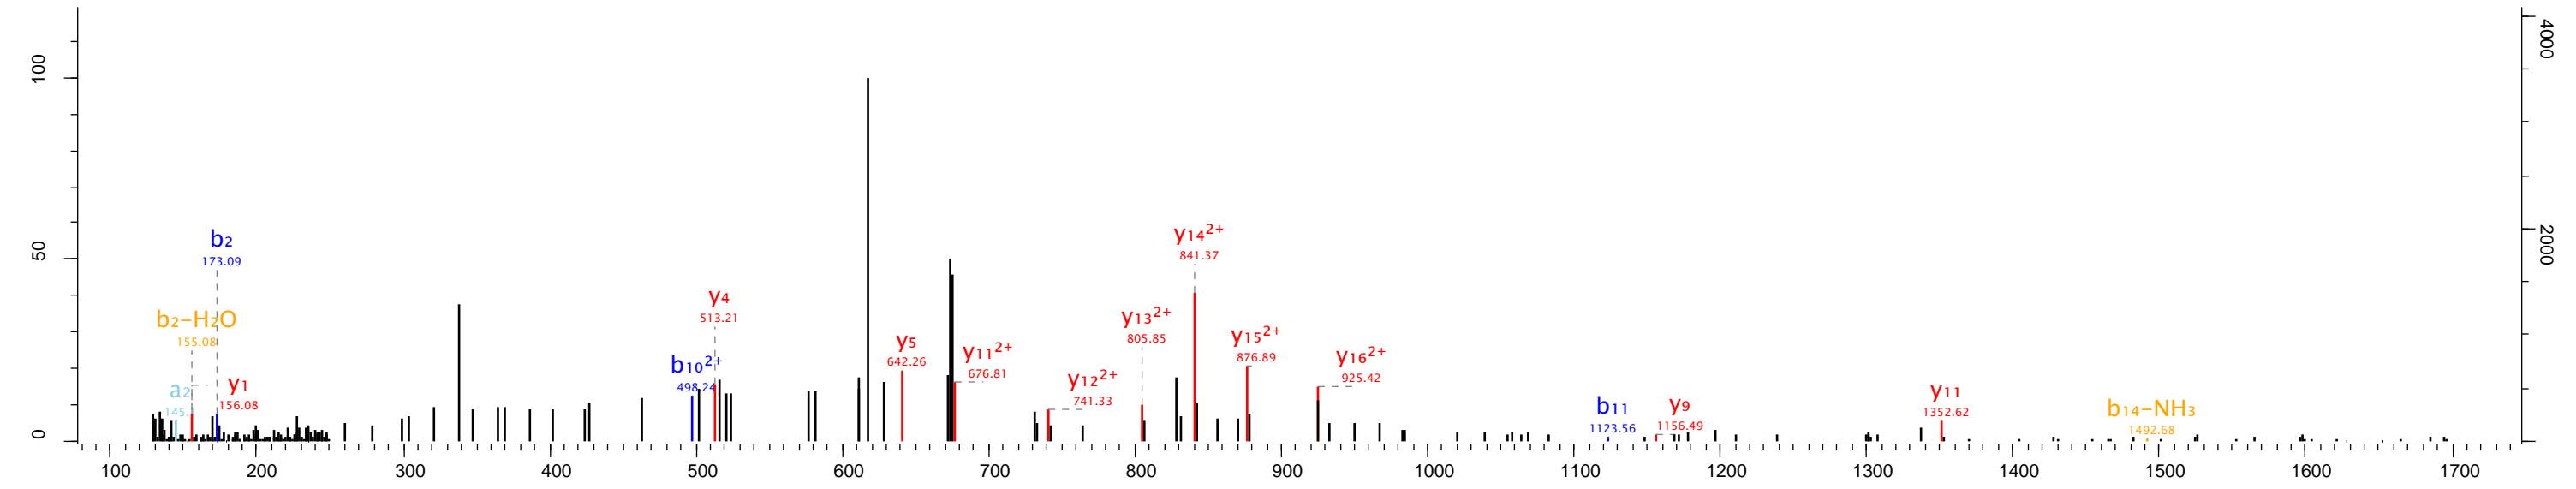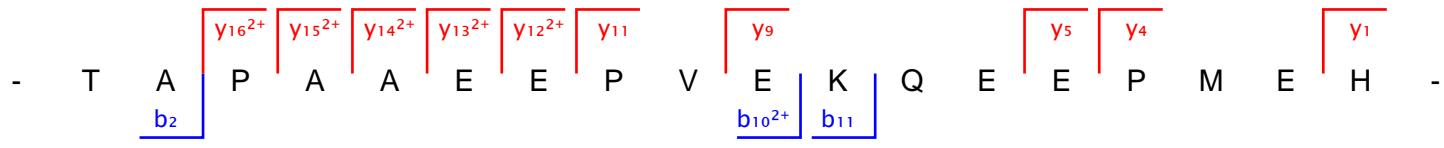

Spectral Annotation for Single-Peptide IDs in 16-cell Embryo using Q-OT-LIT

Raw file Scan Method Score m/z  
 2015-01-05\_CL02\_2Excl15sMaxInj70 14427 ITMS; HCD 88.47 760.05

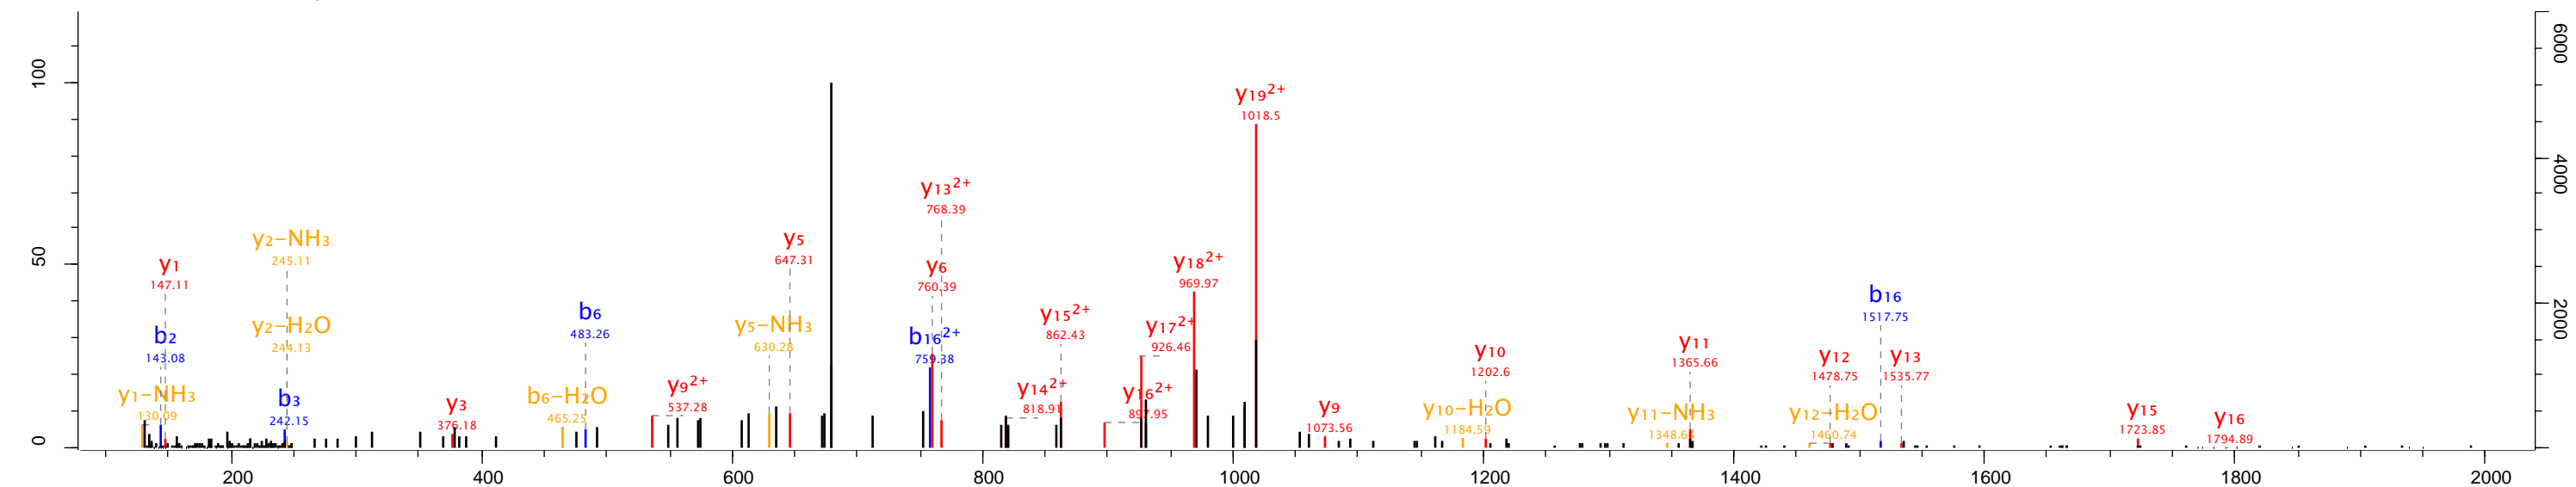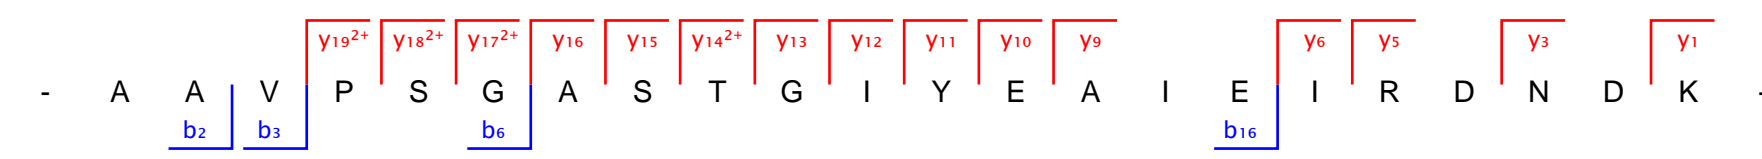

Raw file: 2015-01-05\_CL02\_2Excl15sMaxInj70  
 Scan: 14566 Method: ITMS; HCD Score: 64.73 m/z: 614.78

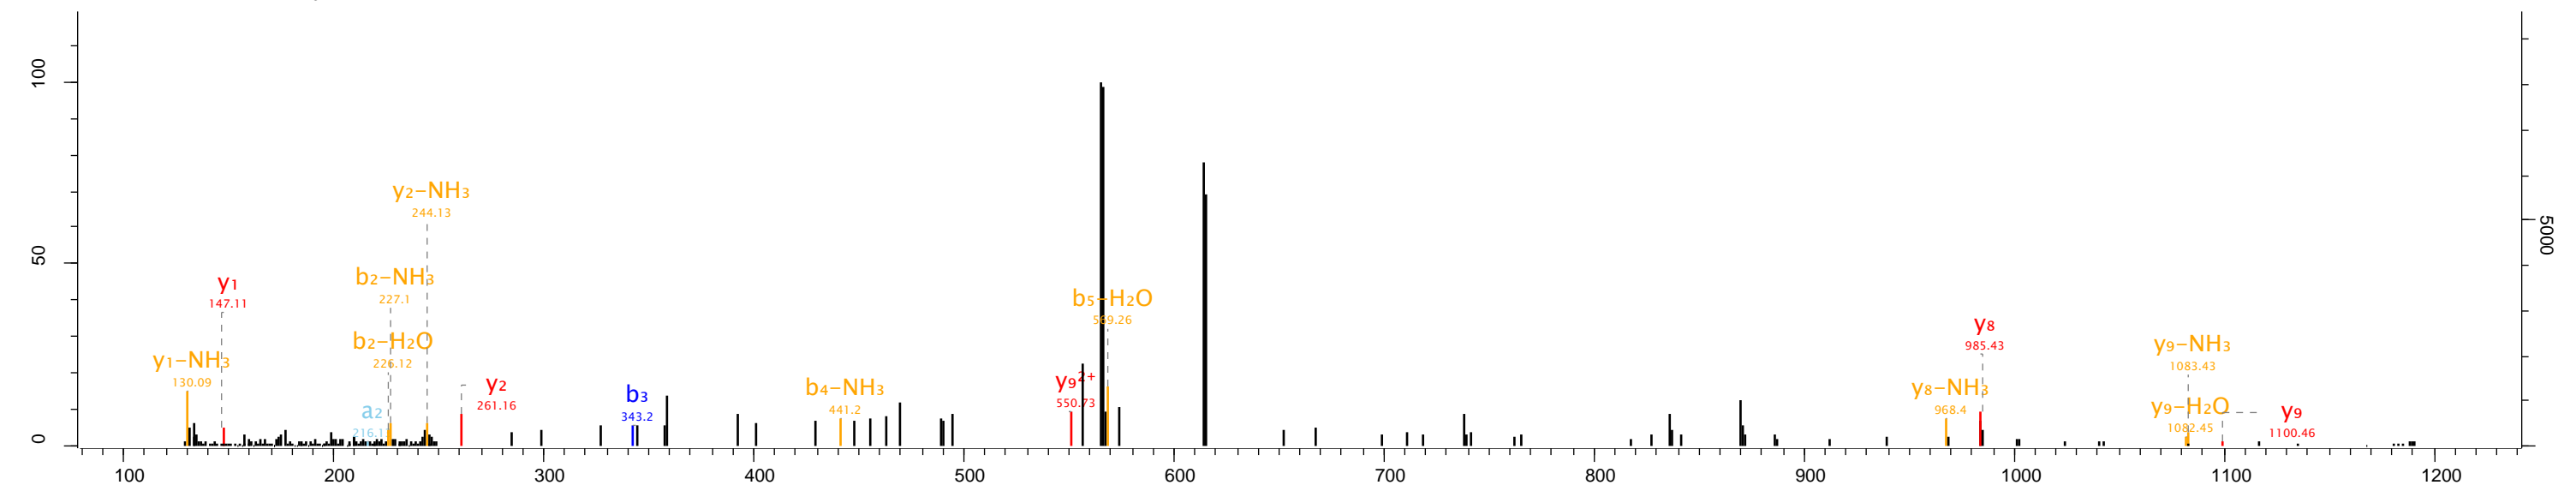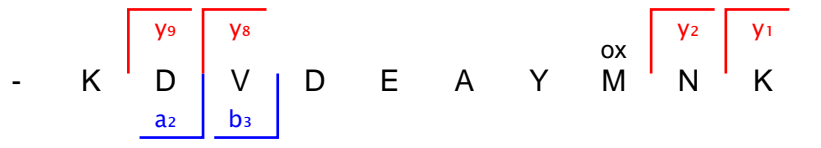

Raw file 2015-01-05\_CL02\_2Excl15sMaxInj70 Scan 14596 Method ITMS; HCD Score 89.67 m/z 720.02

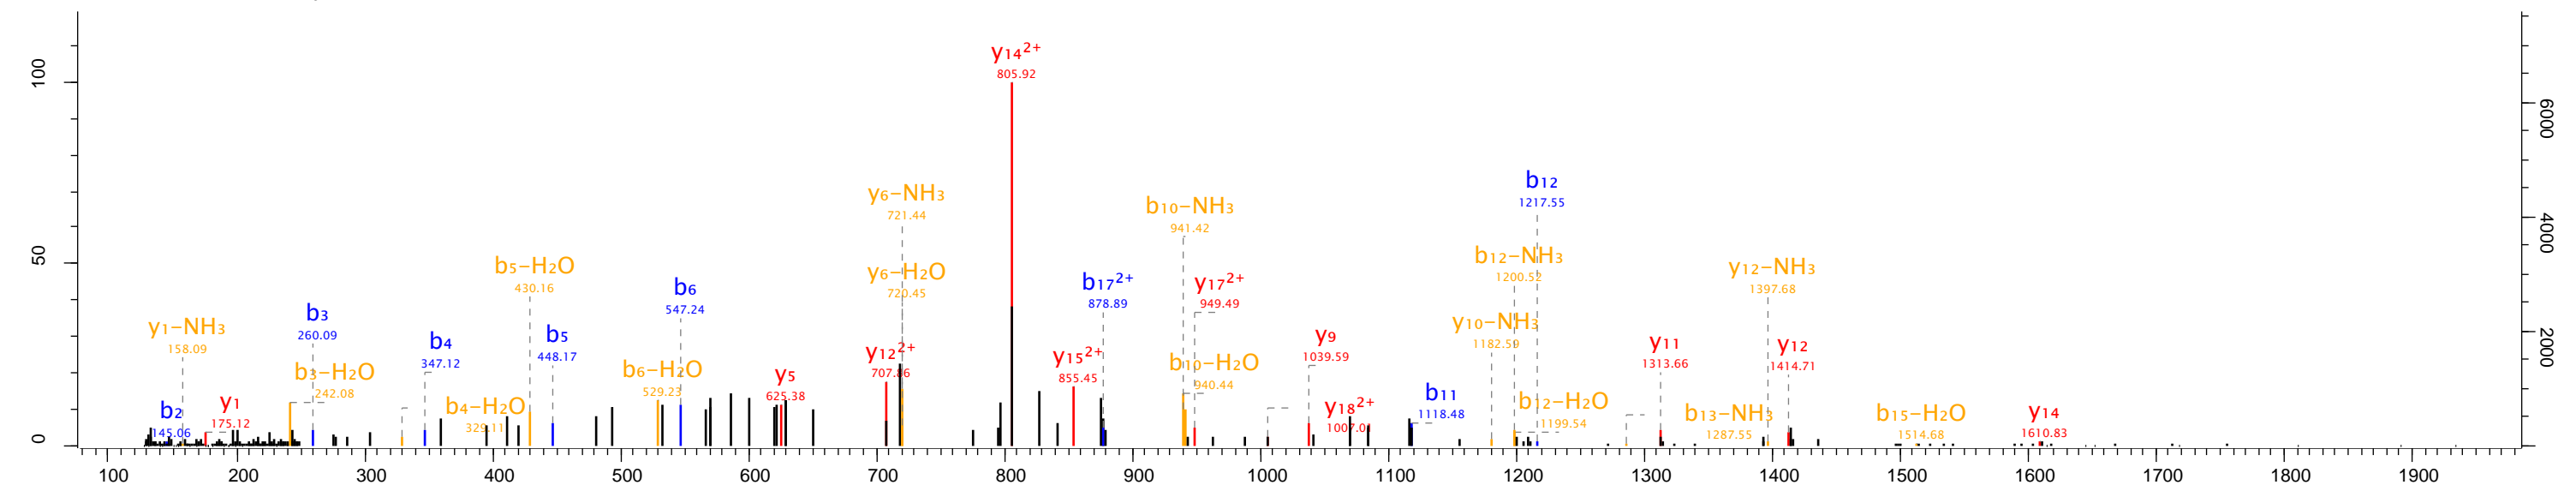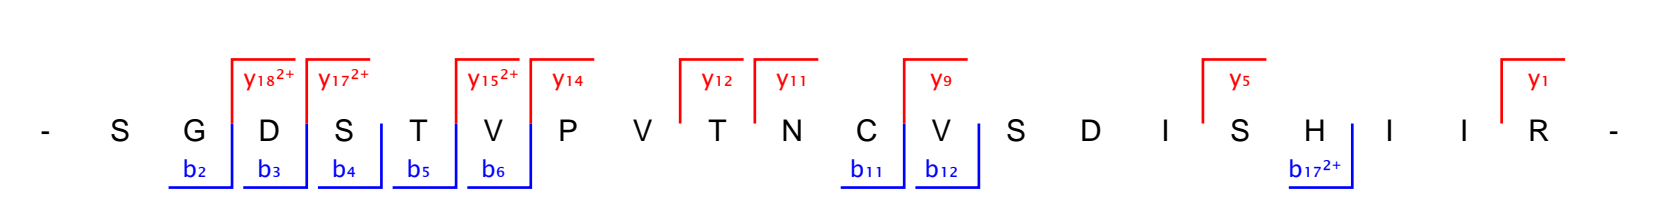

Spectral Annotation for Single-Peptide IDs in 16-cell Embryo using Q-OT-LIT



Raw file 2015-01-05\_CL02\_2Excl15sMaxInj70 Scan 14638 Method ITMS; HCD Score 79.47 m/z 598.32

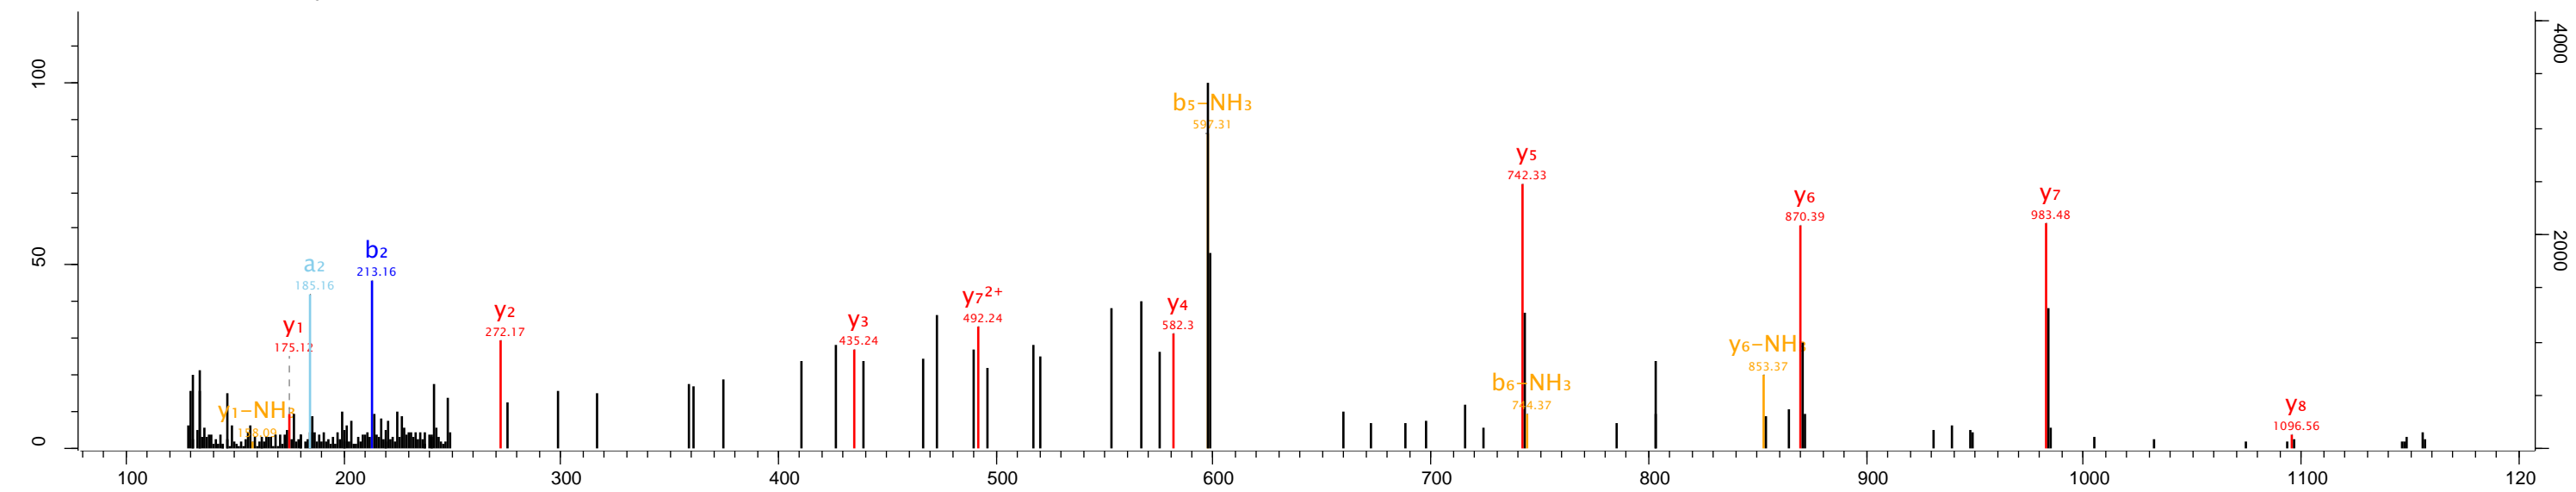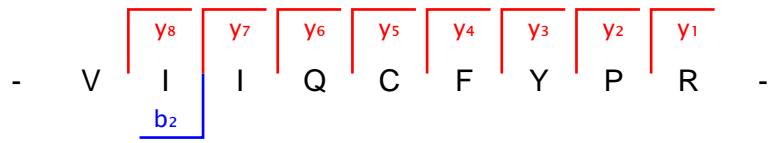

Raw file 2015-01-05\_CL02\_2Excl15sMaxInj70 Scan 14711 Method ITMS; HCD Score 99.34 m/z 594.83

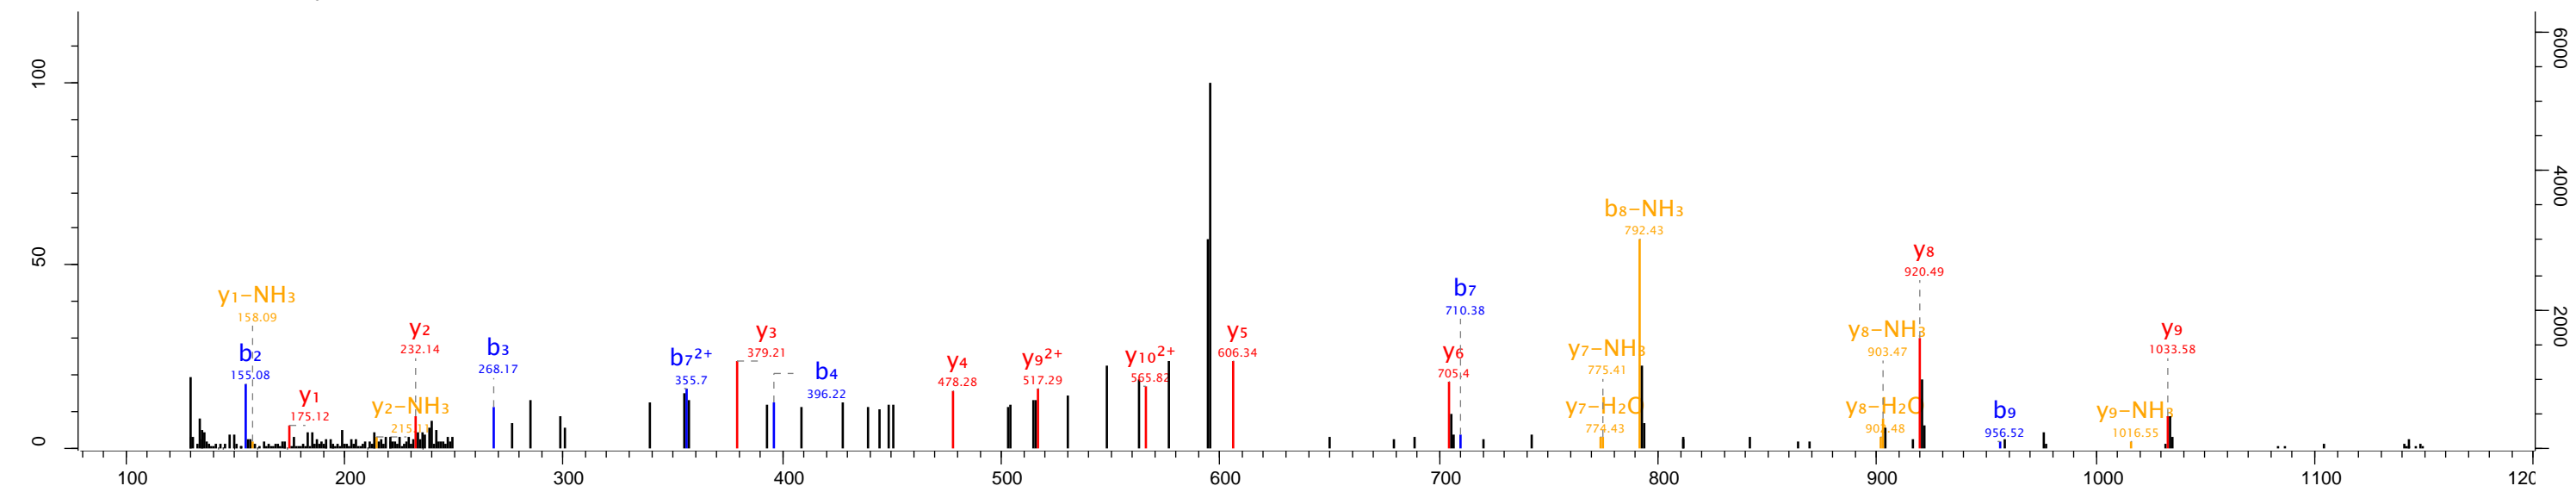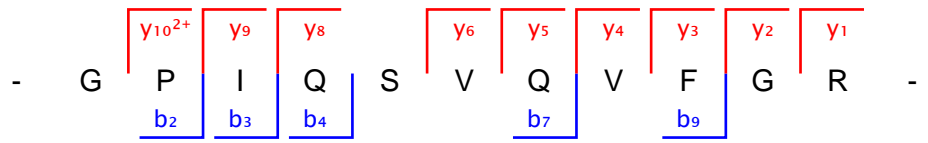

Spectral Annotation for Single-Peptide IDs in 16-cell Embryo using Q-OT-LIT

Raw file 2015-01-05\_CL02\_2Excl15sMaxInj70 Scan 14736 Method ITMS; HCD Score 103.31 m/z 594.33

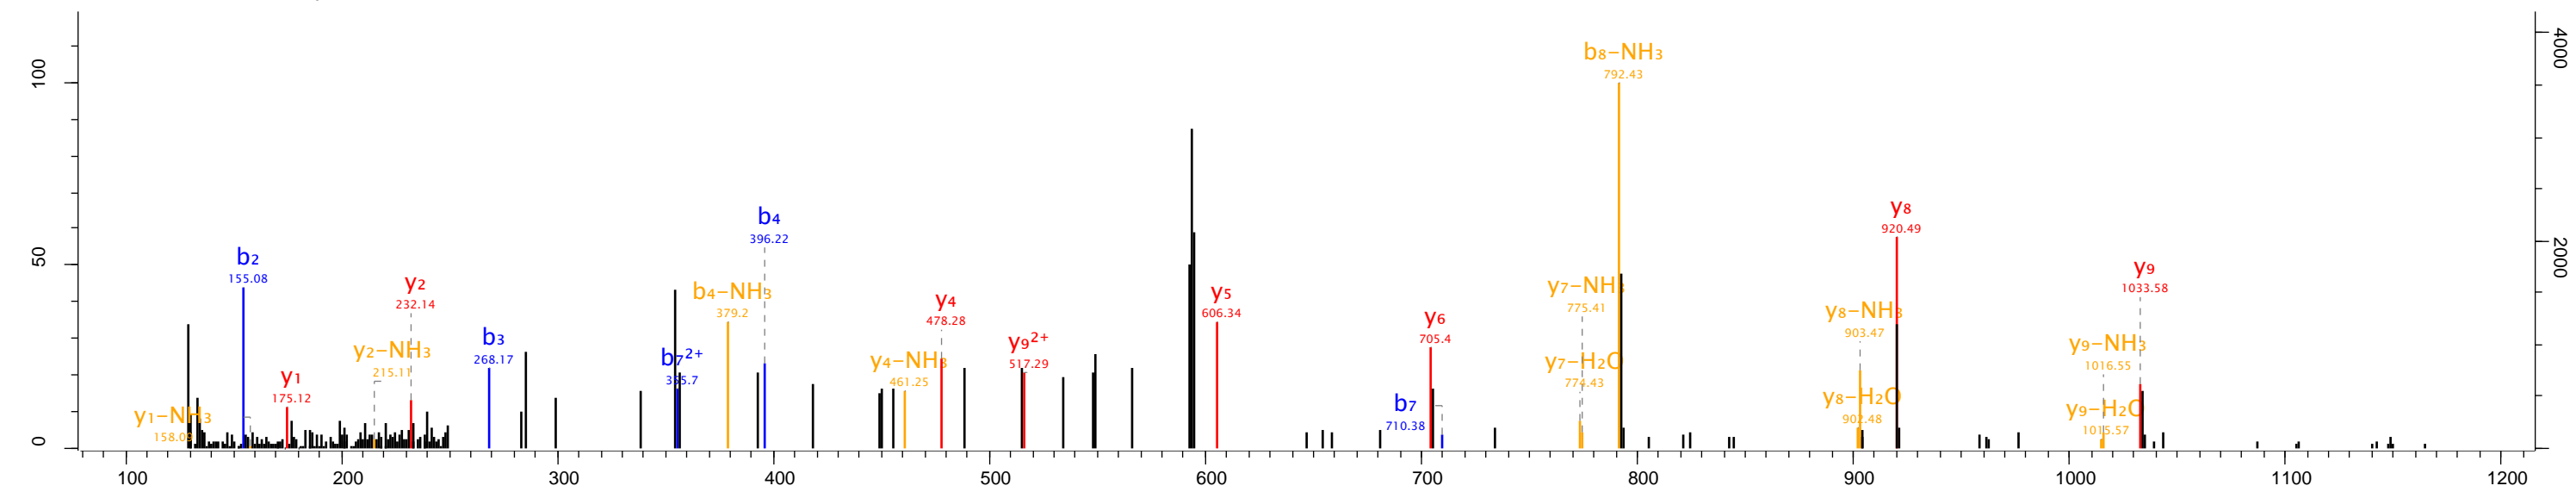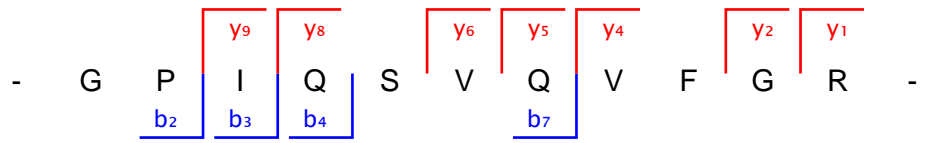

Spectral Annotation for Single-Peptide IDs in 16-cell Embryo using Q-OT-LIT

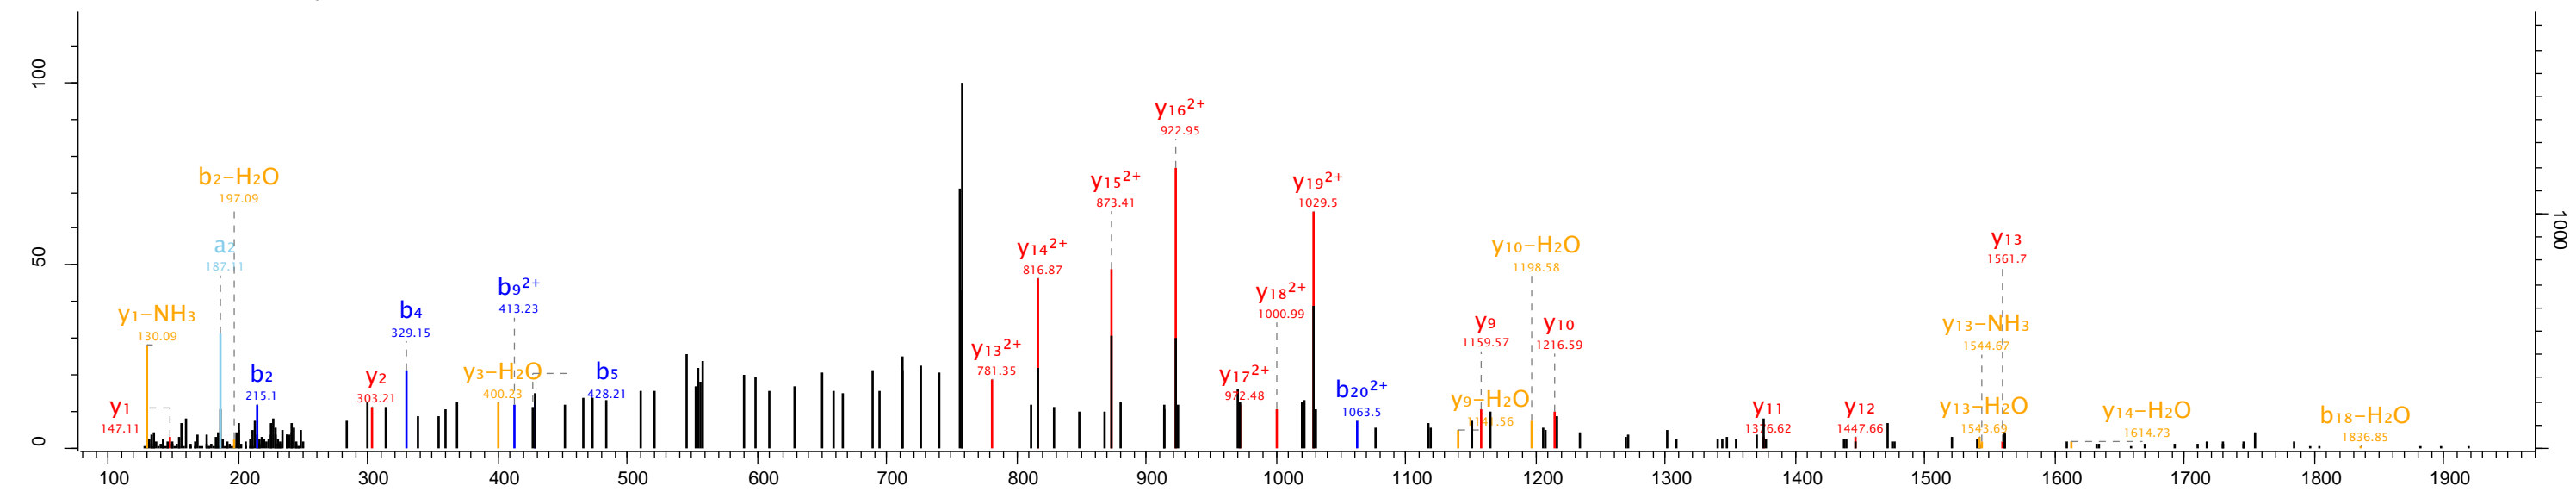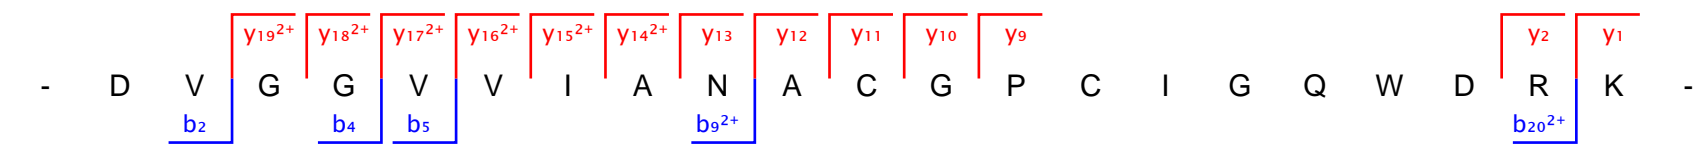

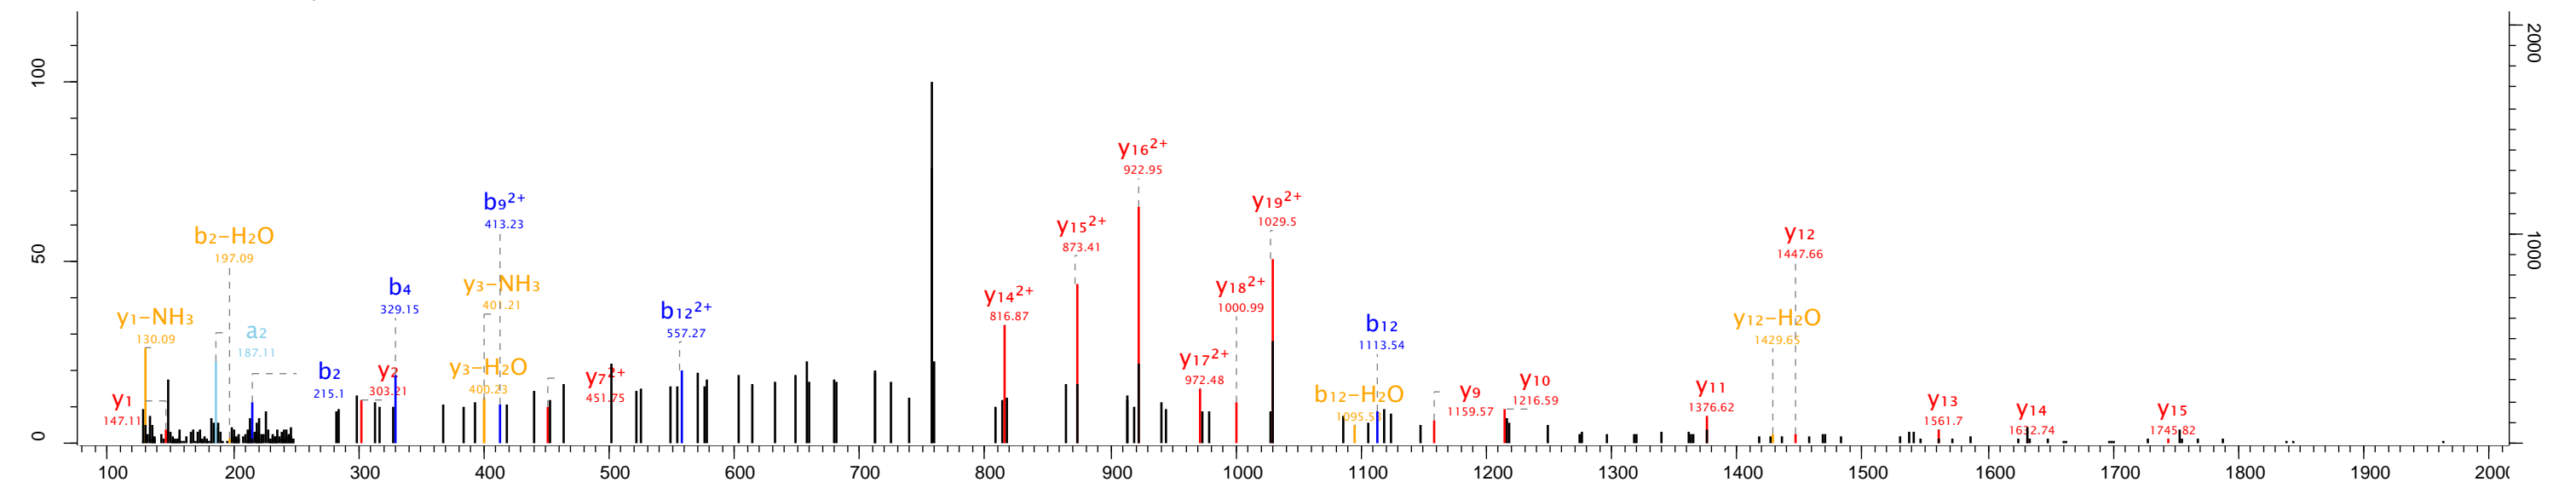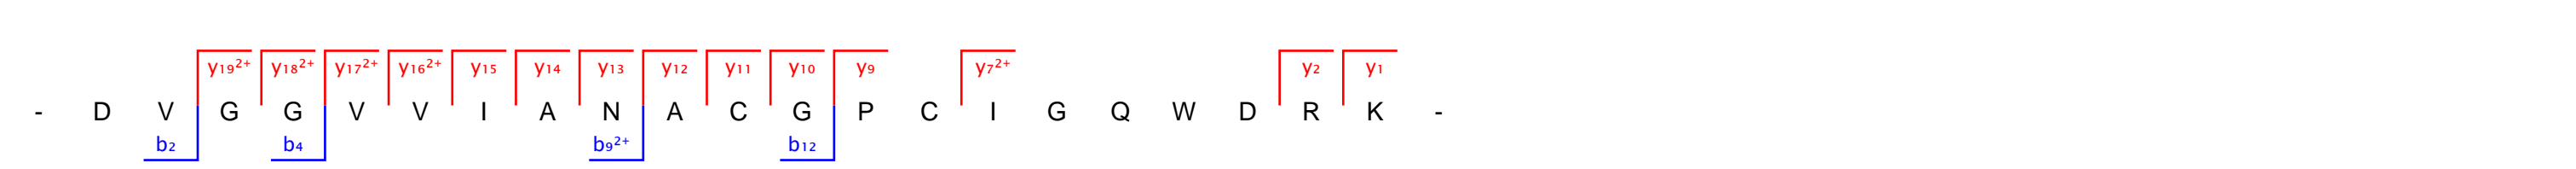

Raw file 2015-01-05\_CL02\_2Excl15sMaxInj70 Scan 15104 Method ITMS; HCD Score 63.39 m/z 758.7

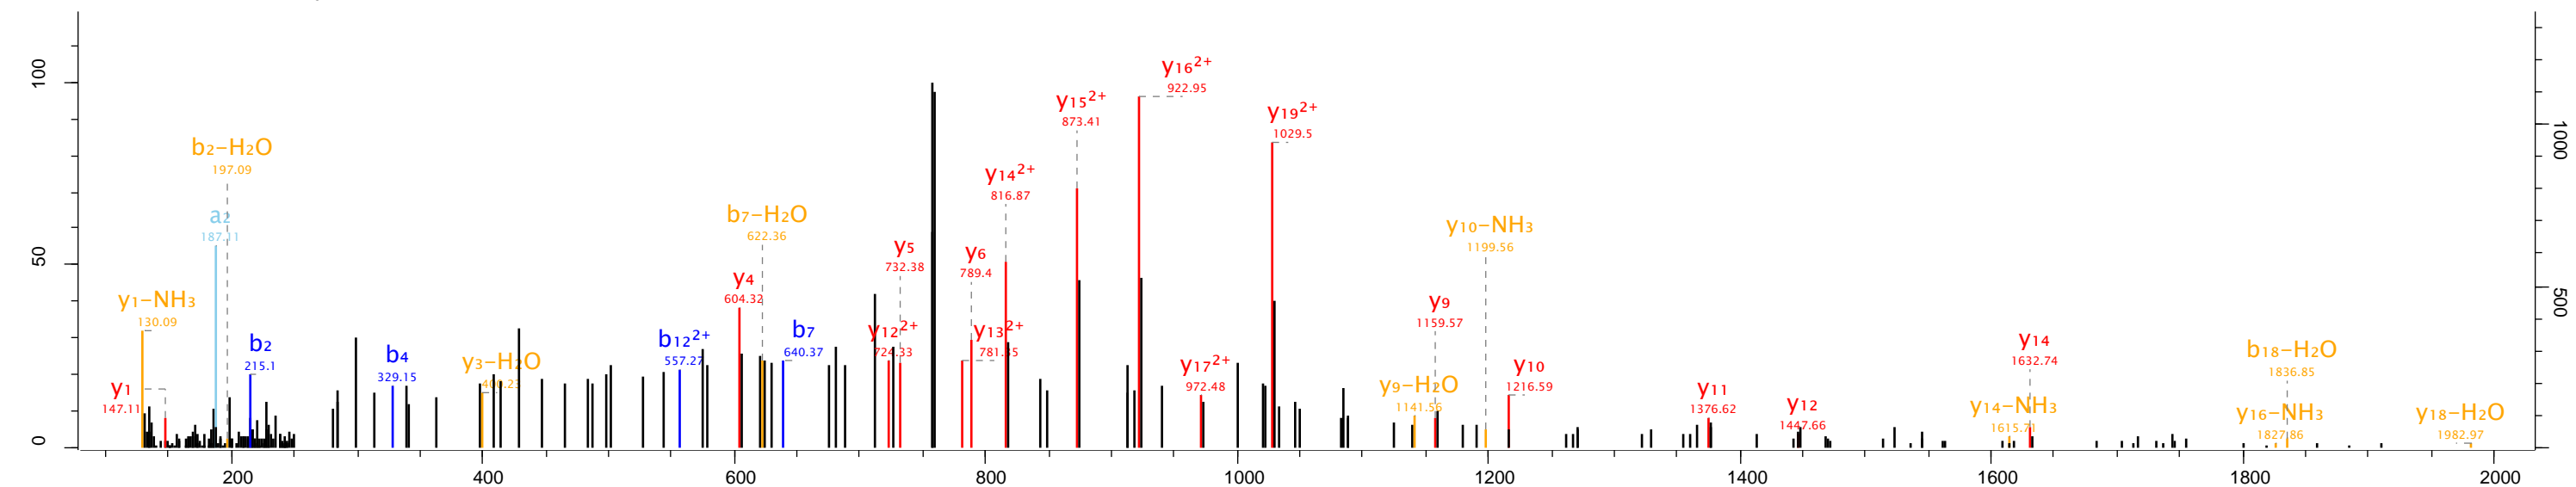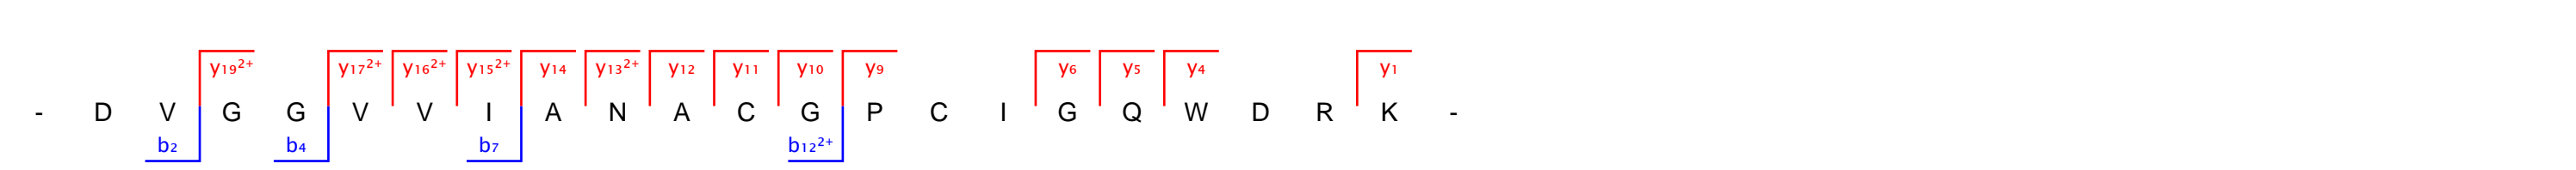

Raw file: 2015-01-05\_CL02\_2Excl15sMaxInj70  
 Scan: 15111 Method: ITMS; HCD Score: 49.71 m/z: 682.38

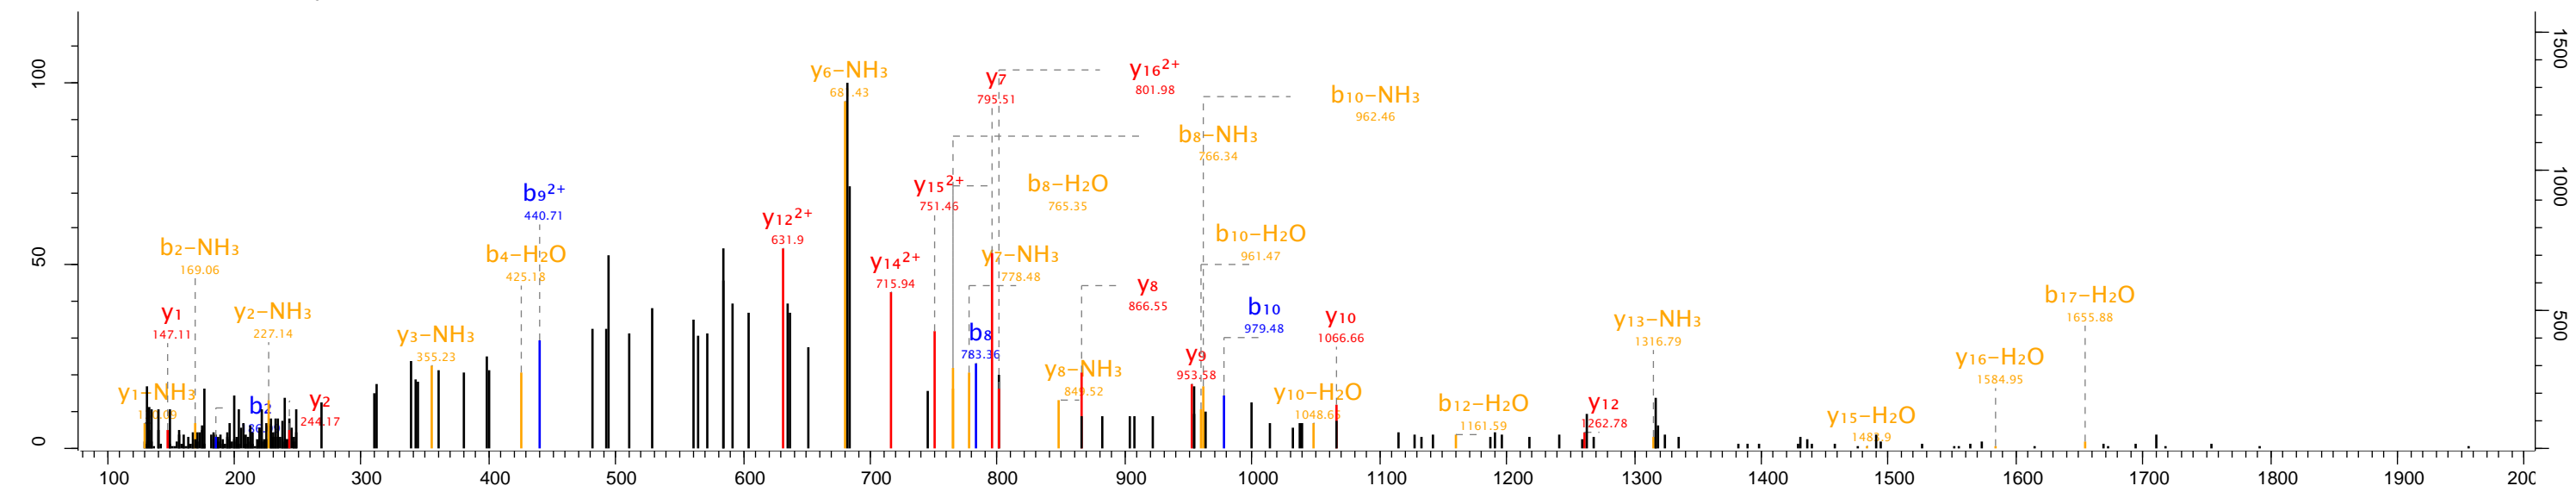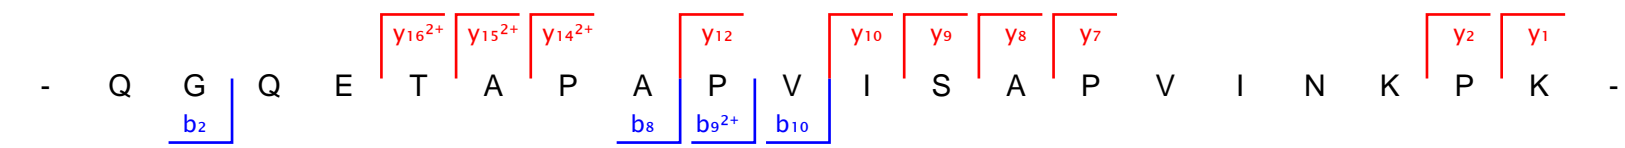

Spectral Annotation for Single-Peptide IDs in 16-cell Embryo using Q-OT-LIT

Raw file: 2015-01-05\_CL02\_2Excl15sMaxInj70  
 Scan: 15353 Method: ITMS; HCD Score: 83.14 m/z: 574.82

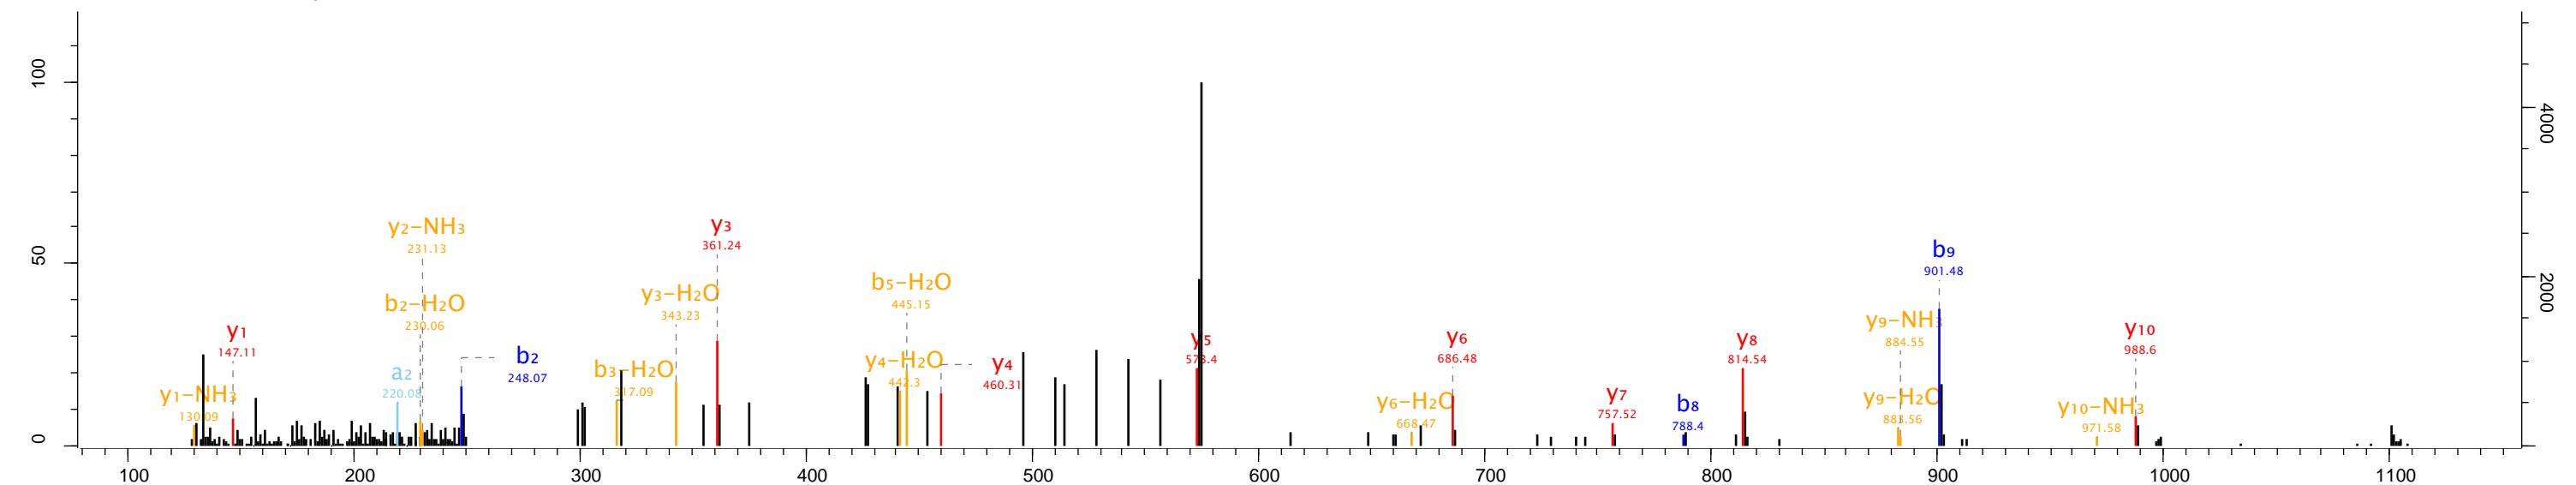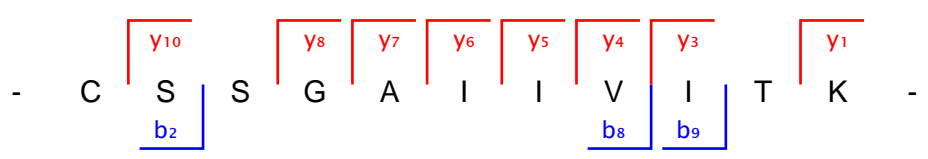

Spectral Annotation for Single-Peptide IDs in 16-cell Embryo using Q-OT-LIT



Raw file: 2015-01-05\_CL02\_2Excl15sMaxInj70  
 Scan: 15368 Method: ITMS; HCD Score: 97.78 m/z: 574.82

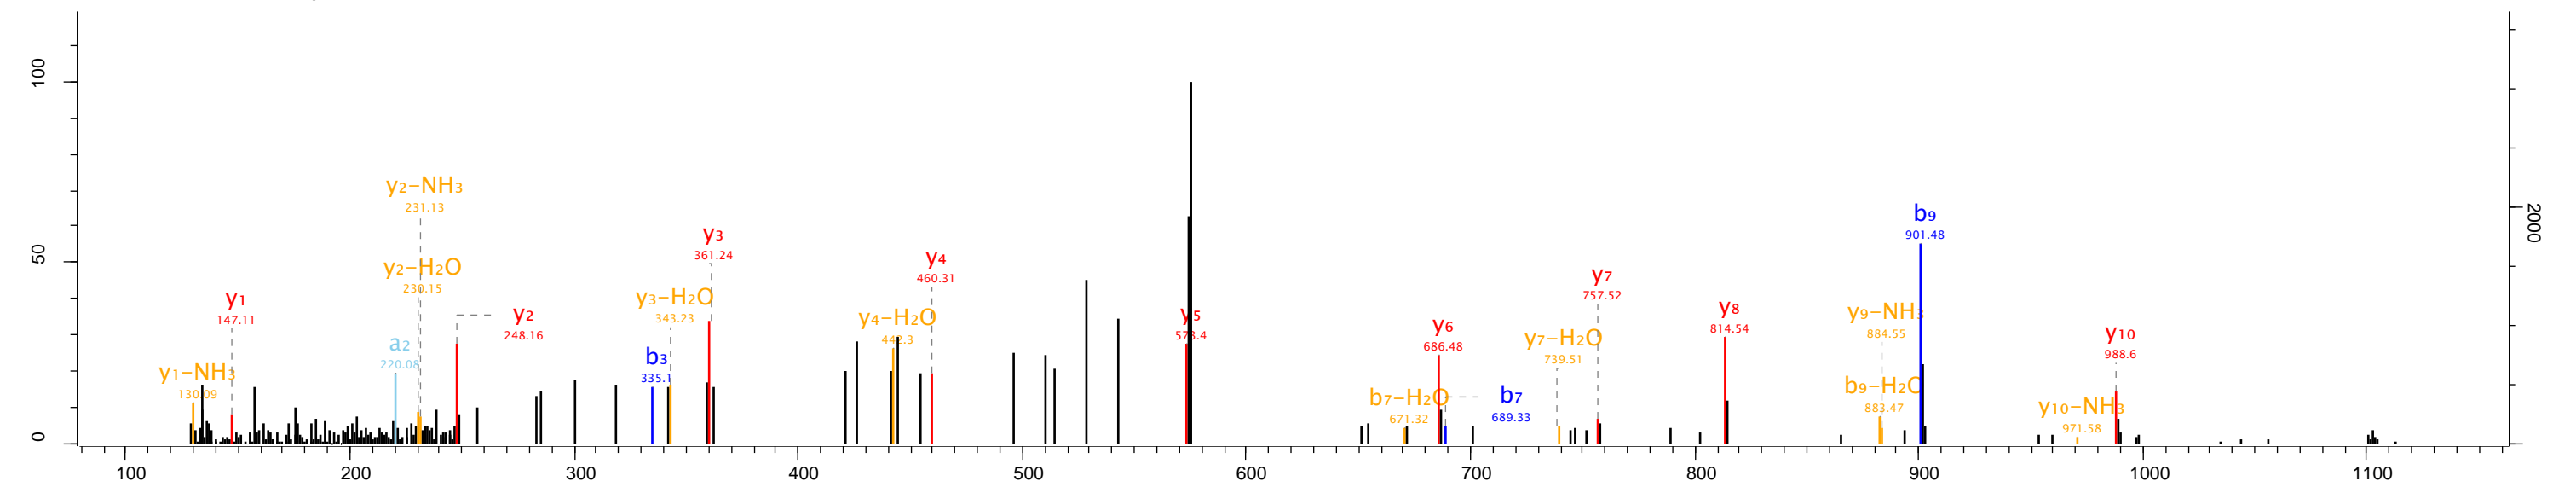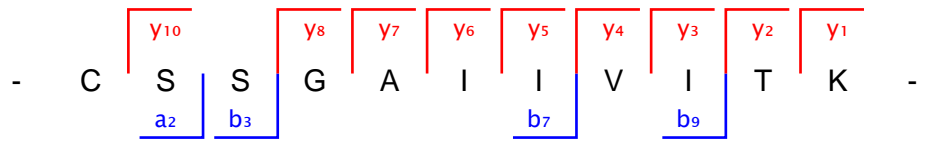

Spectral Annotation for Single-Peptide IDs in 16-cell Embryo using Q-OT-LIT

Raw file Scan Method Score m/z  
 2015-01-05\_CL02\_2Excl15sMaxInj70 15381 ITMS; HCD 72.73 574.82

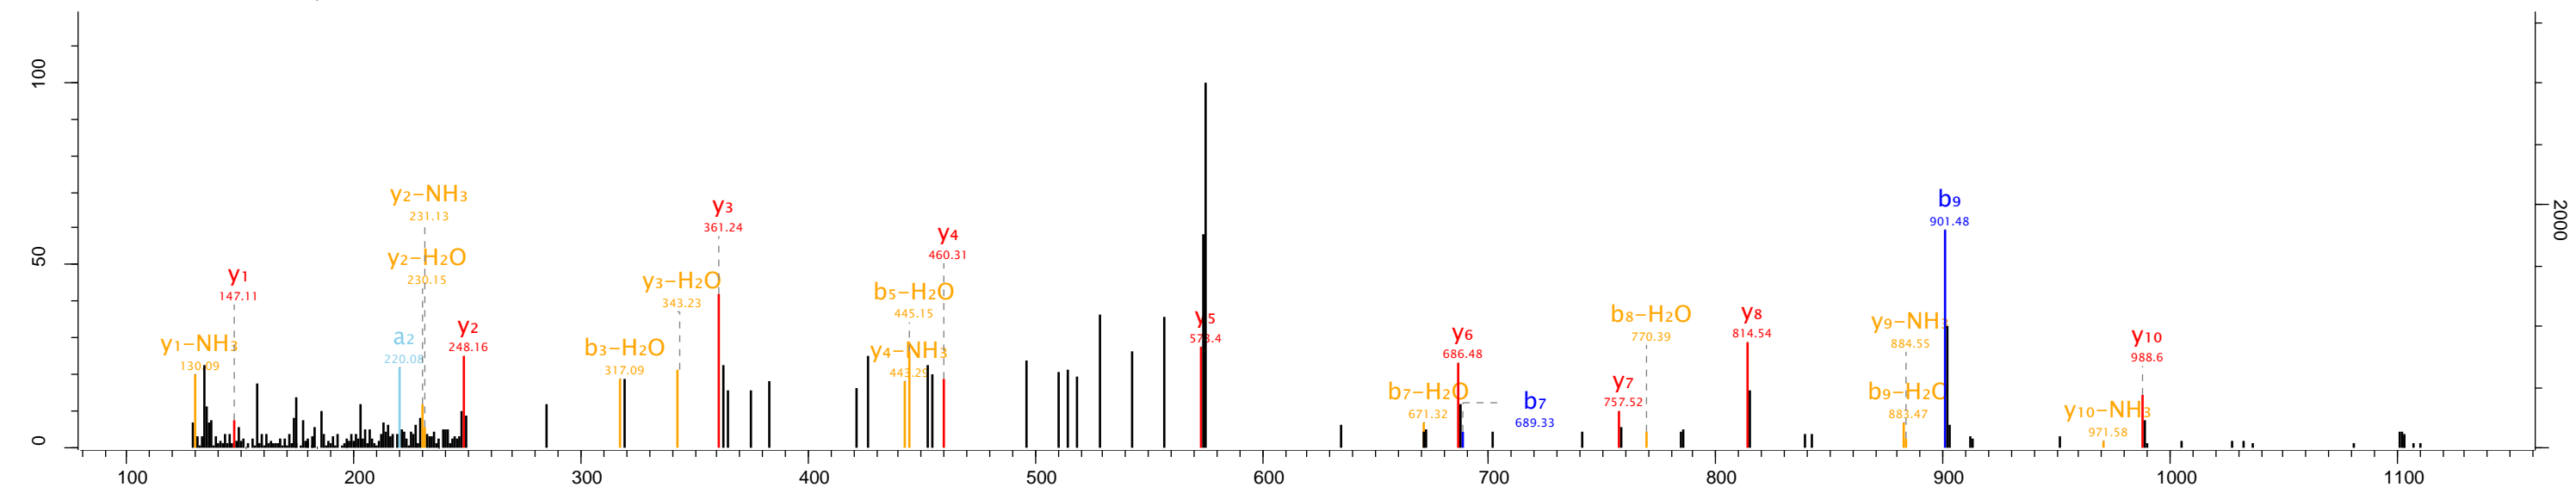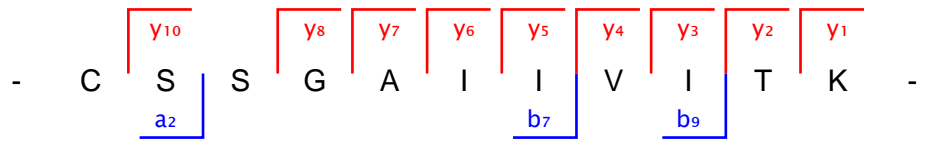

Spectral Annotation for Single-Peptide IDs in 16-cell Embryo using Q-OT-LIT

Raw file: 2015-01-05\_CL02\_2Excl15sMaxInj70  
 Scan: 15396 Method: ITMS; HCD Score: 74.39 m/z: 574.82

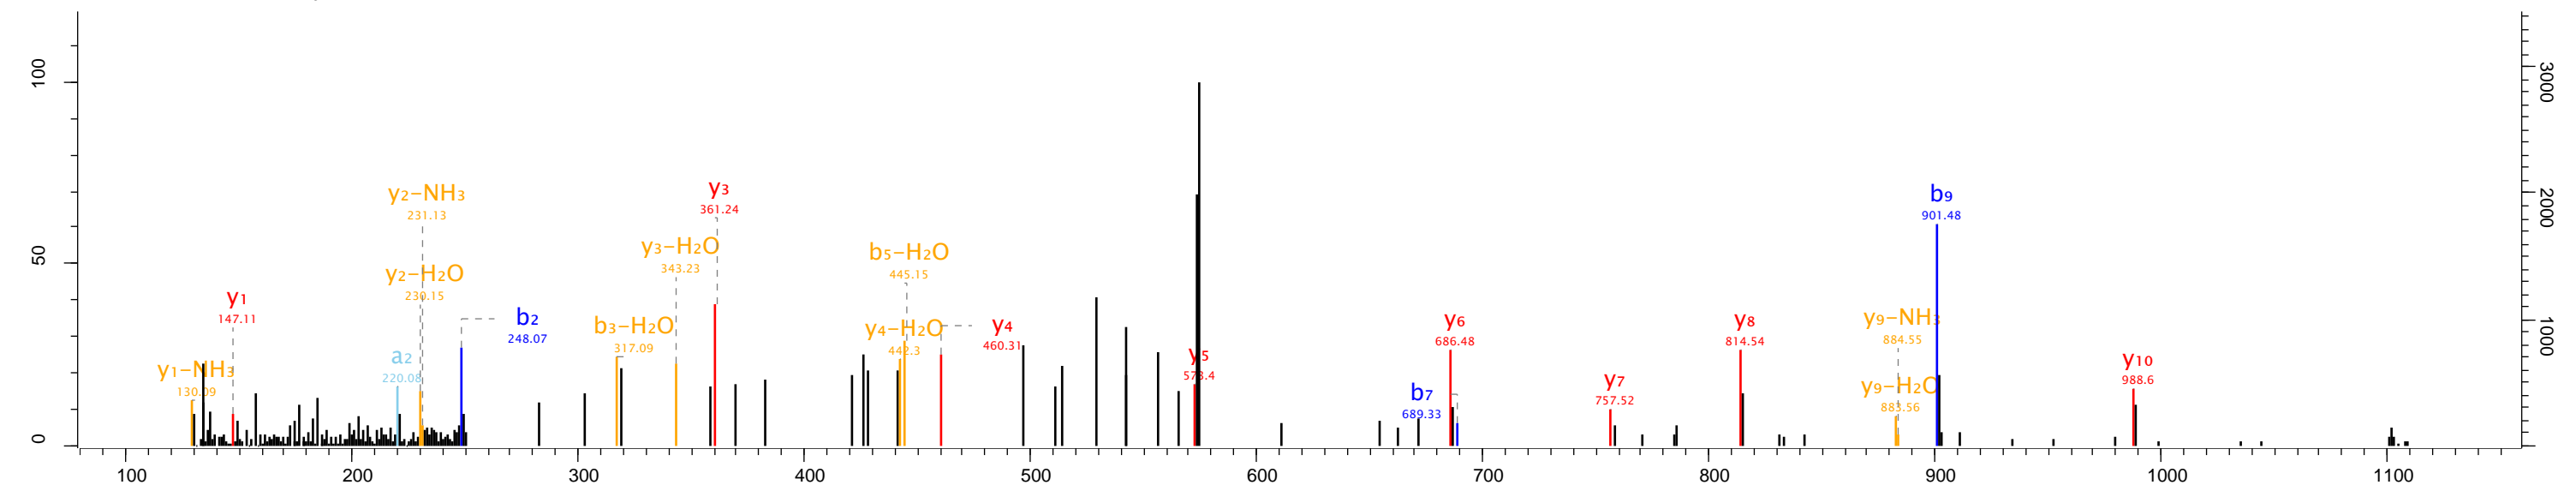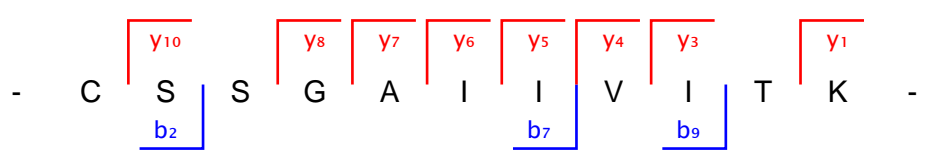

Spectral Annotation for Single-Peptide IDs in 16-cell Embryo using Q-OT-LIT

Raw file  
 2015-01-05\_CL02\_2Excl15sMaxInj70  
 Scan 15410 Method ITMS; HCD Score 74.7 m/z 574.82

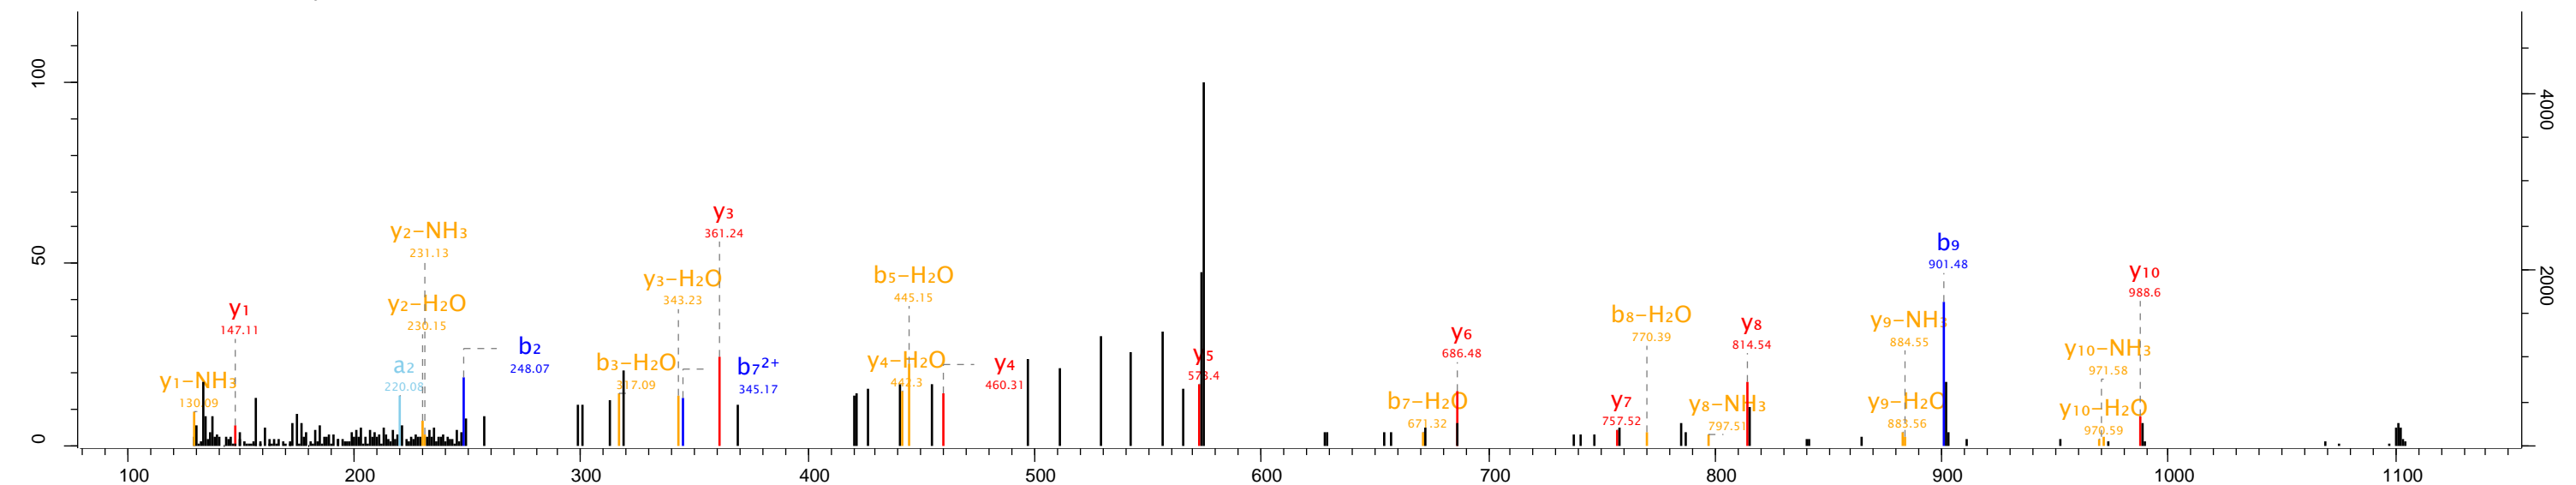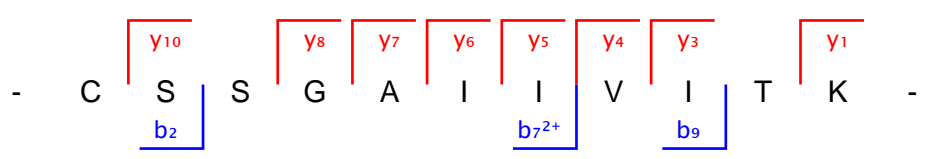

Spectral Annotation for Single-Peptide IDs in 16-cell Embryo using Q-OT-LIT

Raw file  
 2015-01-05\_CL02\_2Excl15sMaxInj70  
 Scan 15413 Method ITMS; HCD Score 79.04 m/z 571.31

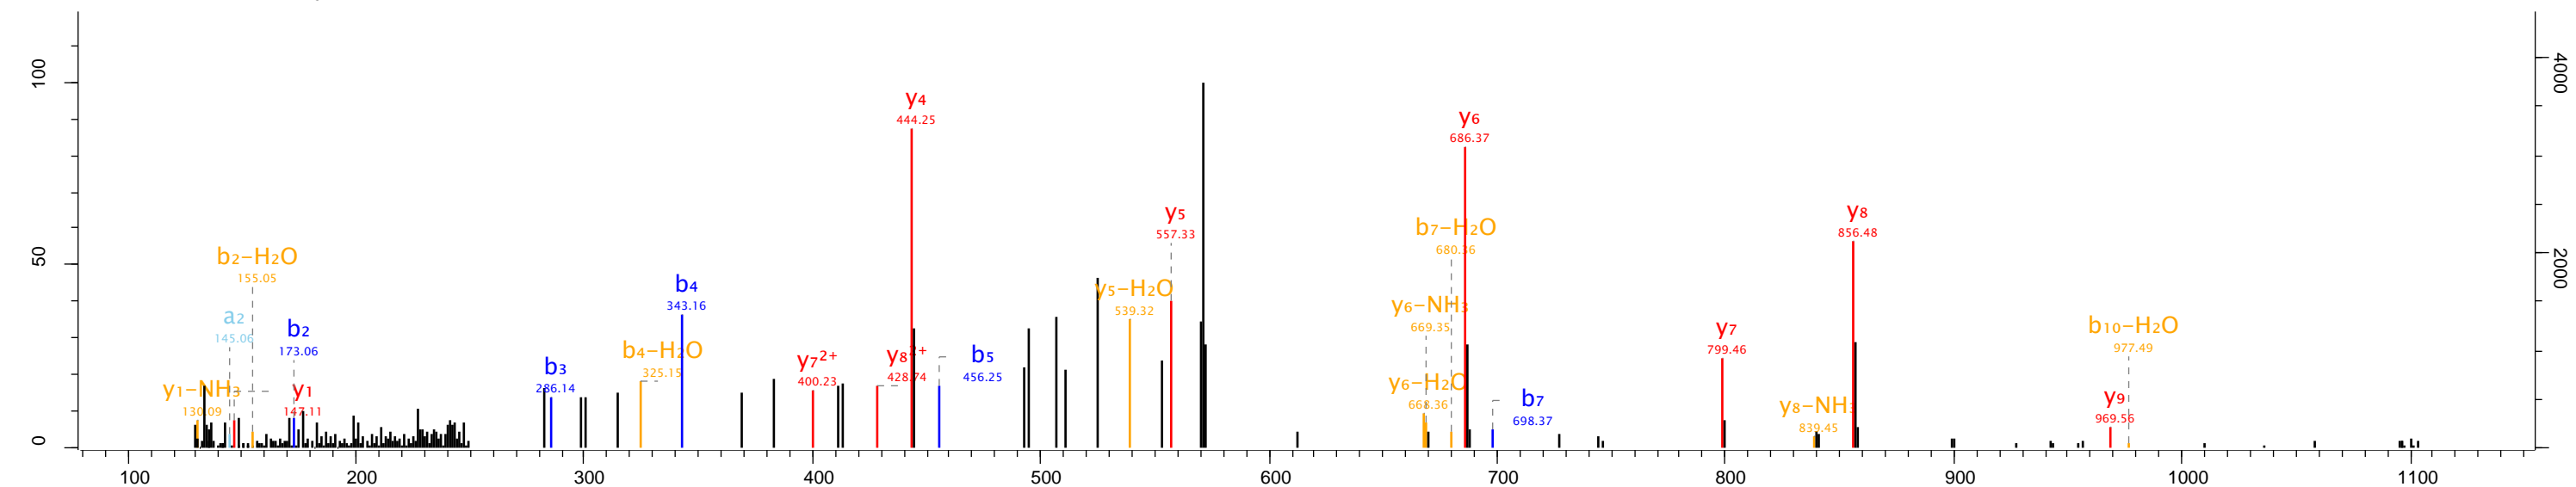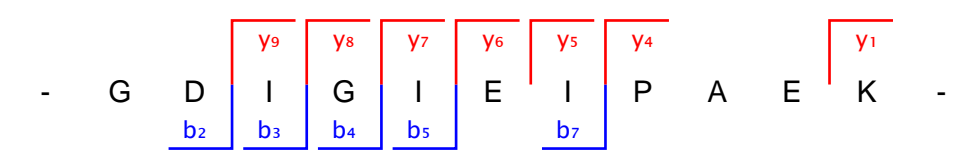

Raw file 2015-01-05\_CL02\_2Excl15sMaxInj70 Scan 15430 Method ITMS; HCD Score 81.52 m/z 571.31

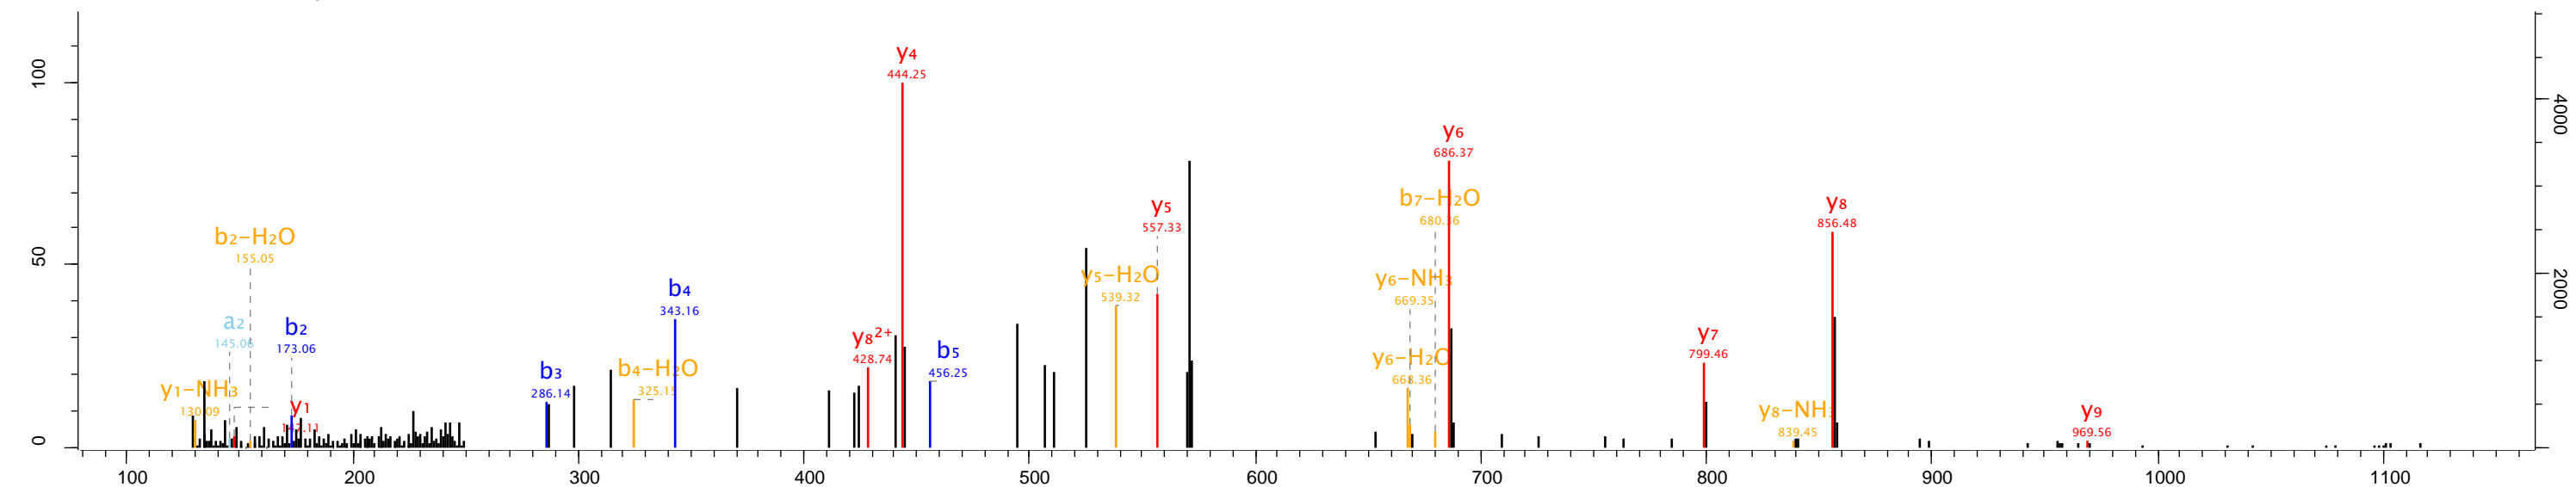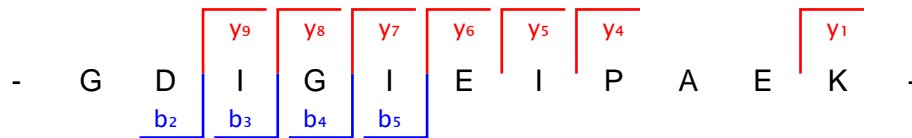

Raw file 2015-01-05\_CL02\_2Excl15sMaxInj70 Scan 15445 Method ITMS; HCD Score 72.53 m/z 571.31

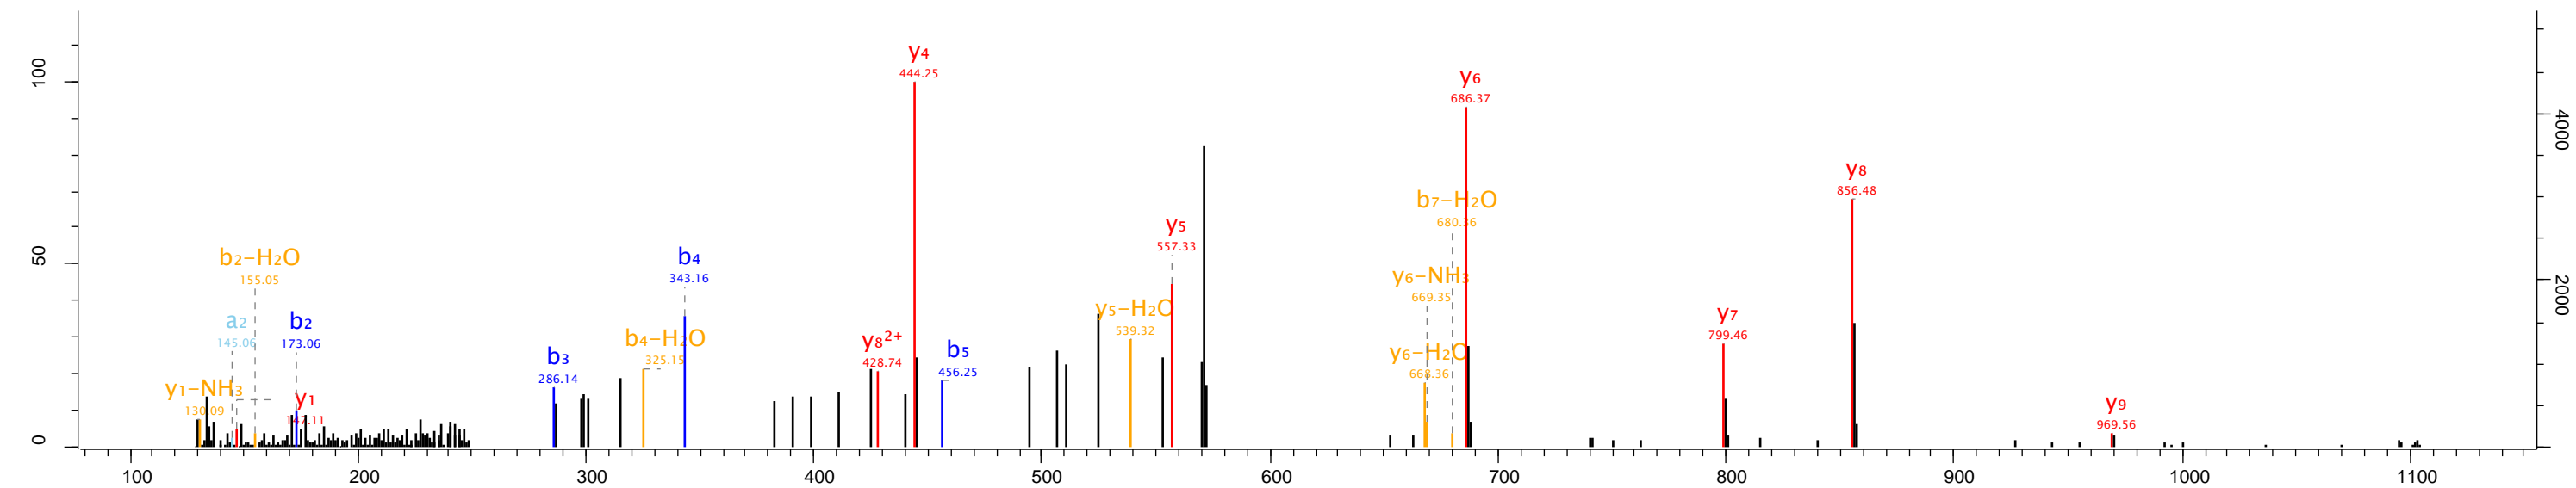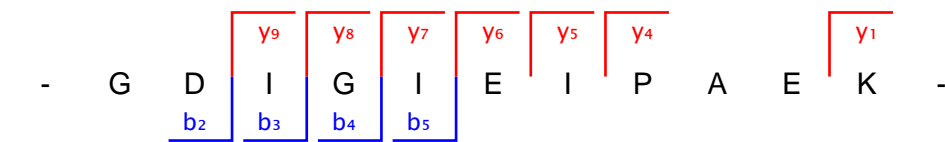

Raw file 2015-01-05\_CL02\_2Excl15sMaxInj70 Scan 15500 Method ITMS; HCD Score 81.62 m/z 571.31

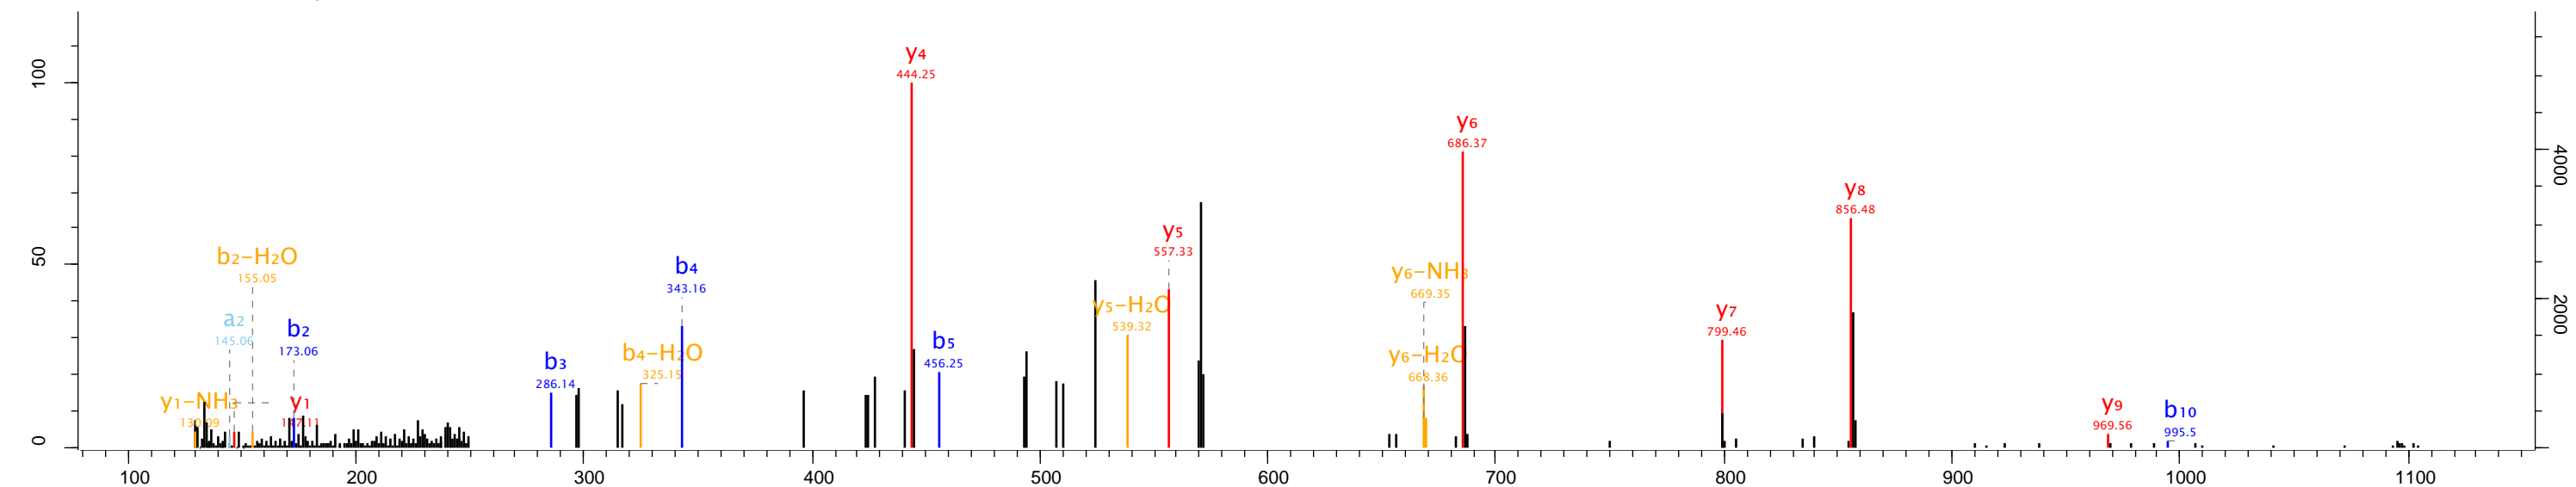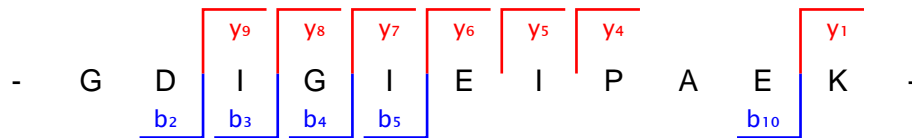

Spectral Annotation for Single-Peptide IDs in 16-cell Embryo using Q-OT-LIT



Raw file 2015-01-05\_CL02\_2Excl15sMaxInj70 Scan 15521 Method ITMS; HCD Score 85.81 m/z 571.31

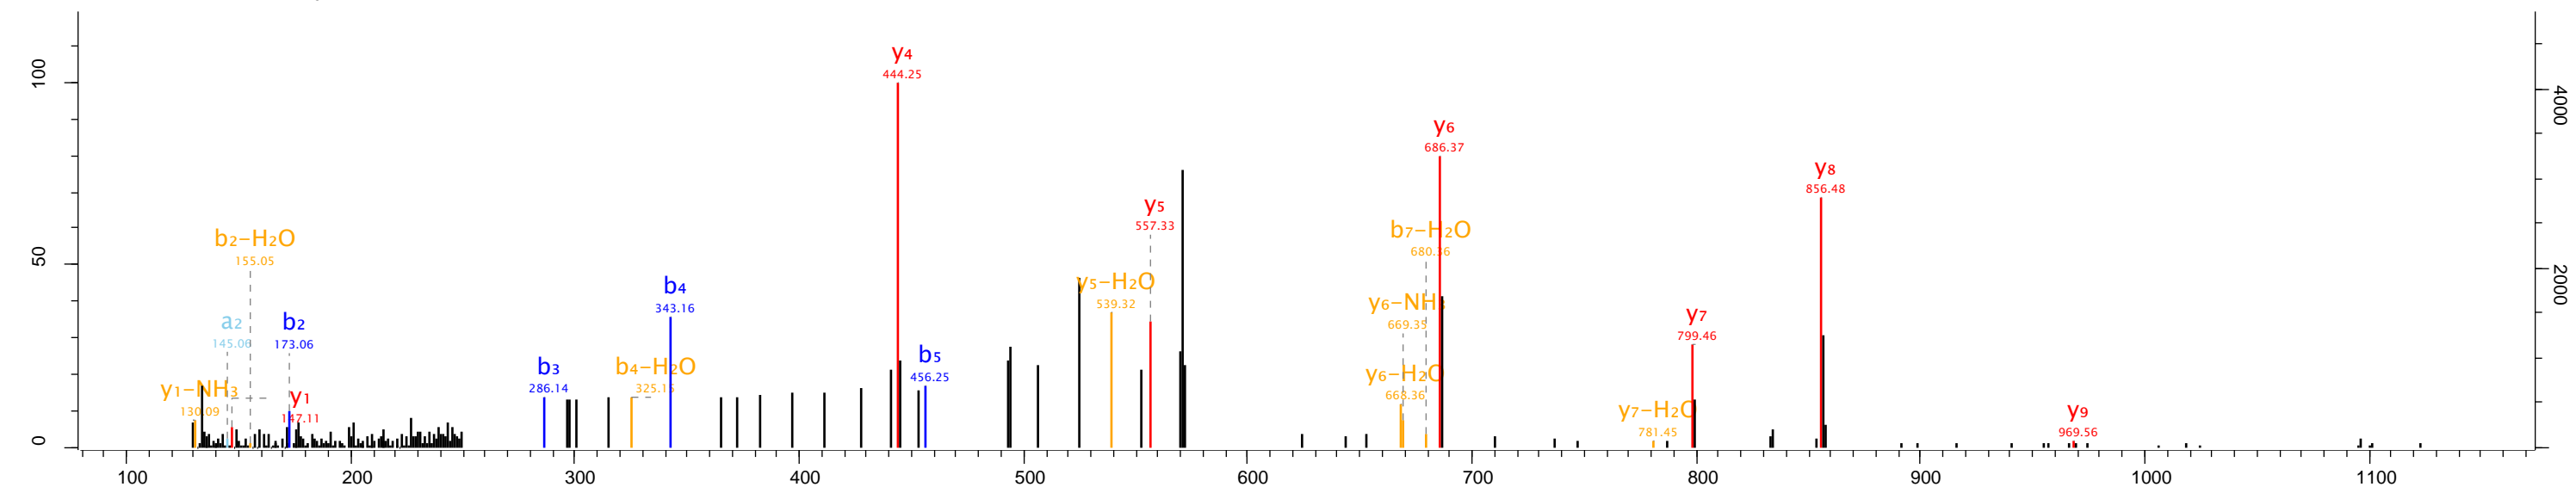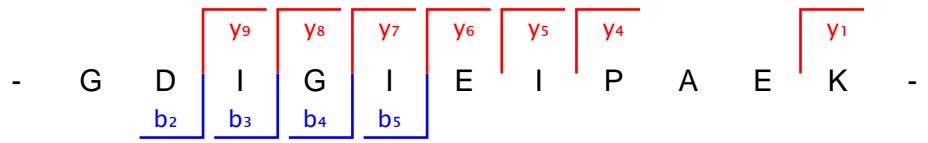

Spectral Annotation for Single-Peptide IDs in 16-cell Embryo using Q-OT-LIT

Raw file 2015-01-05\_CL02\_2Excl15sMaxInj70 Scan 15549 Method ITMS; HCD Score 88.16 m/z 571.31

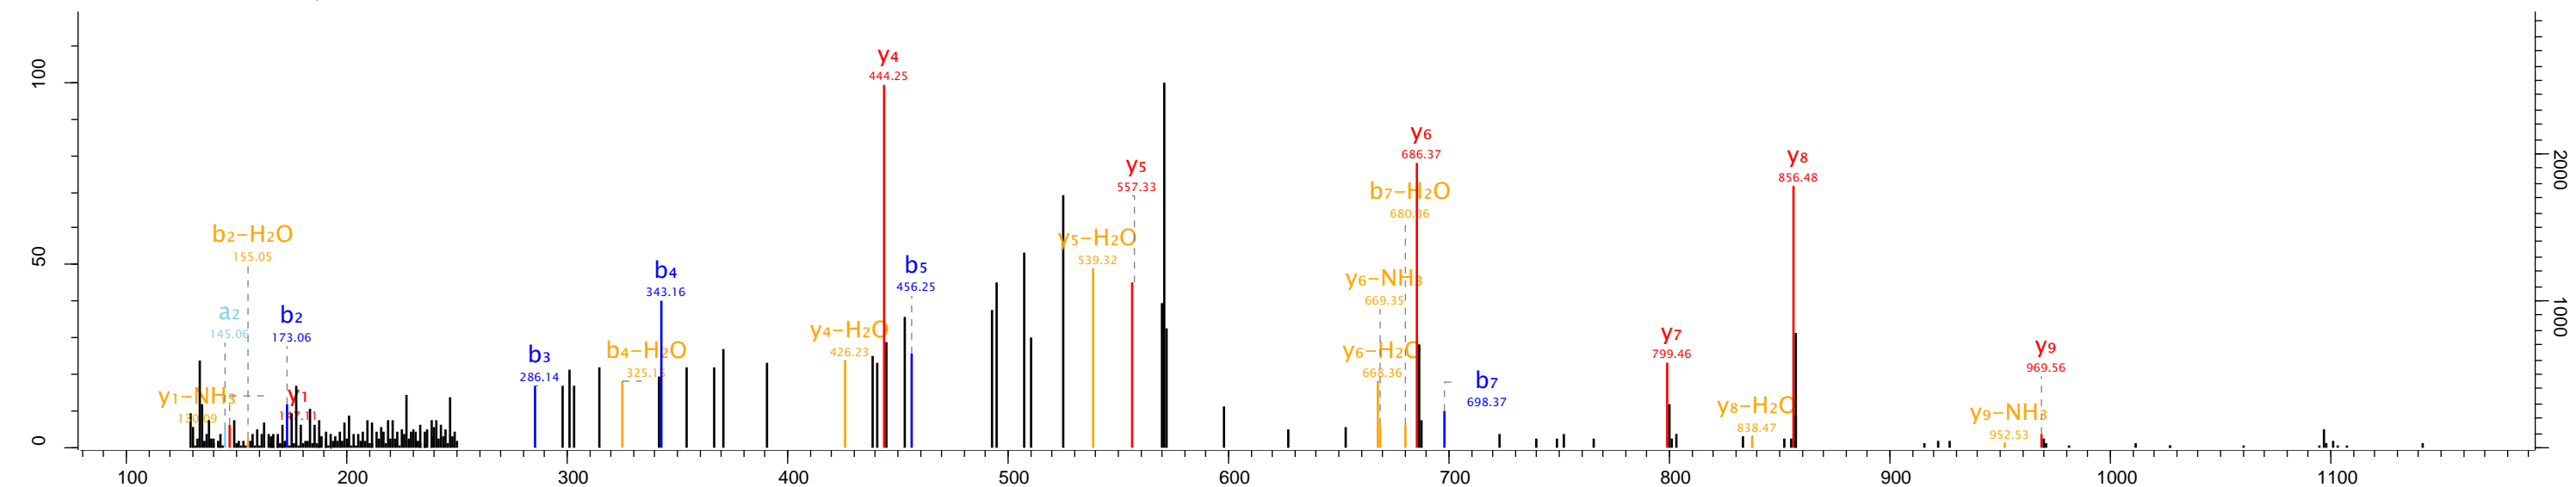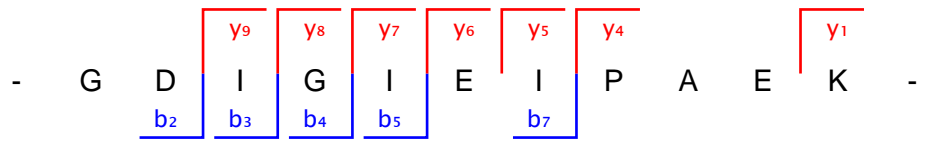

Raw file Scan Method Score m/z  
 2015-01-05\_CL02\_2Excl15sMaxInj70 15745 ITMS; HCD 64.94 565.3

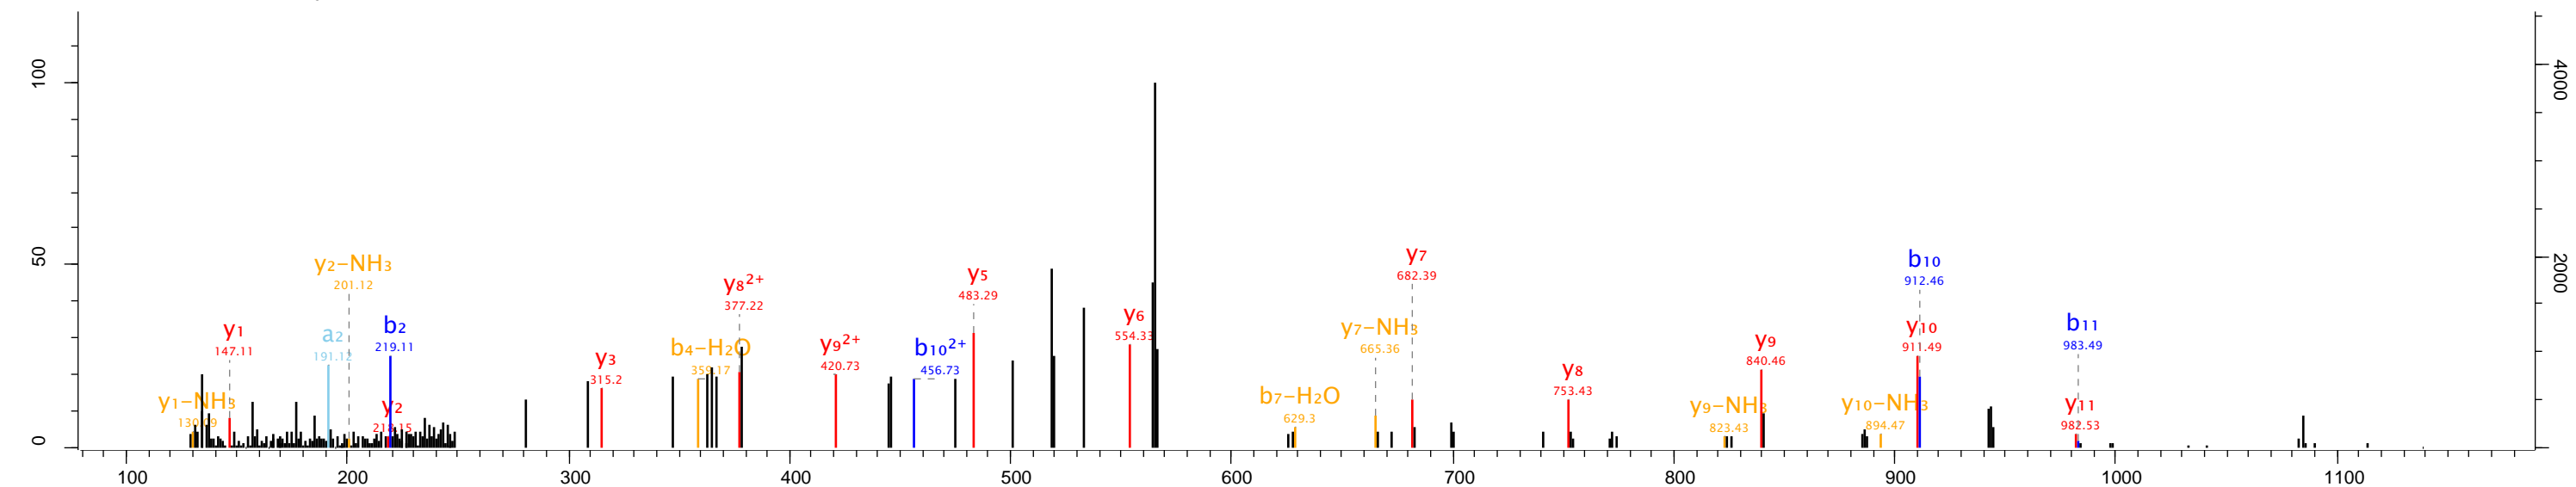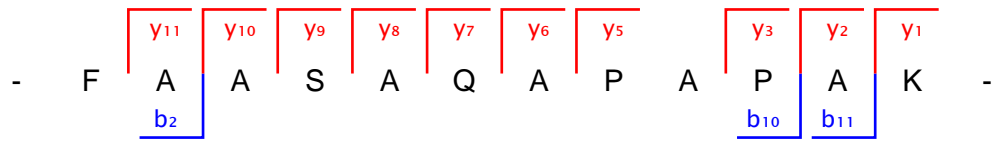

Raw file 2015-01-05\_CL02\_2Excl15sMaxInj70 Scan 16157 Method ITMS; HCD Score 100.69 m/z 614.33

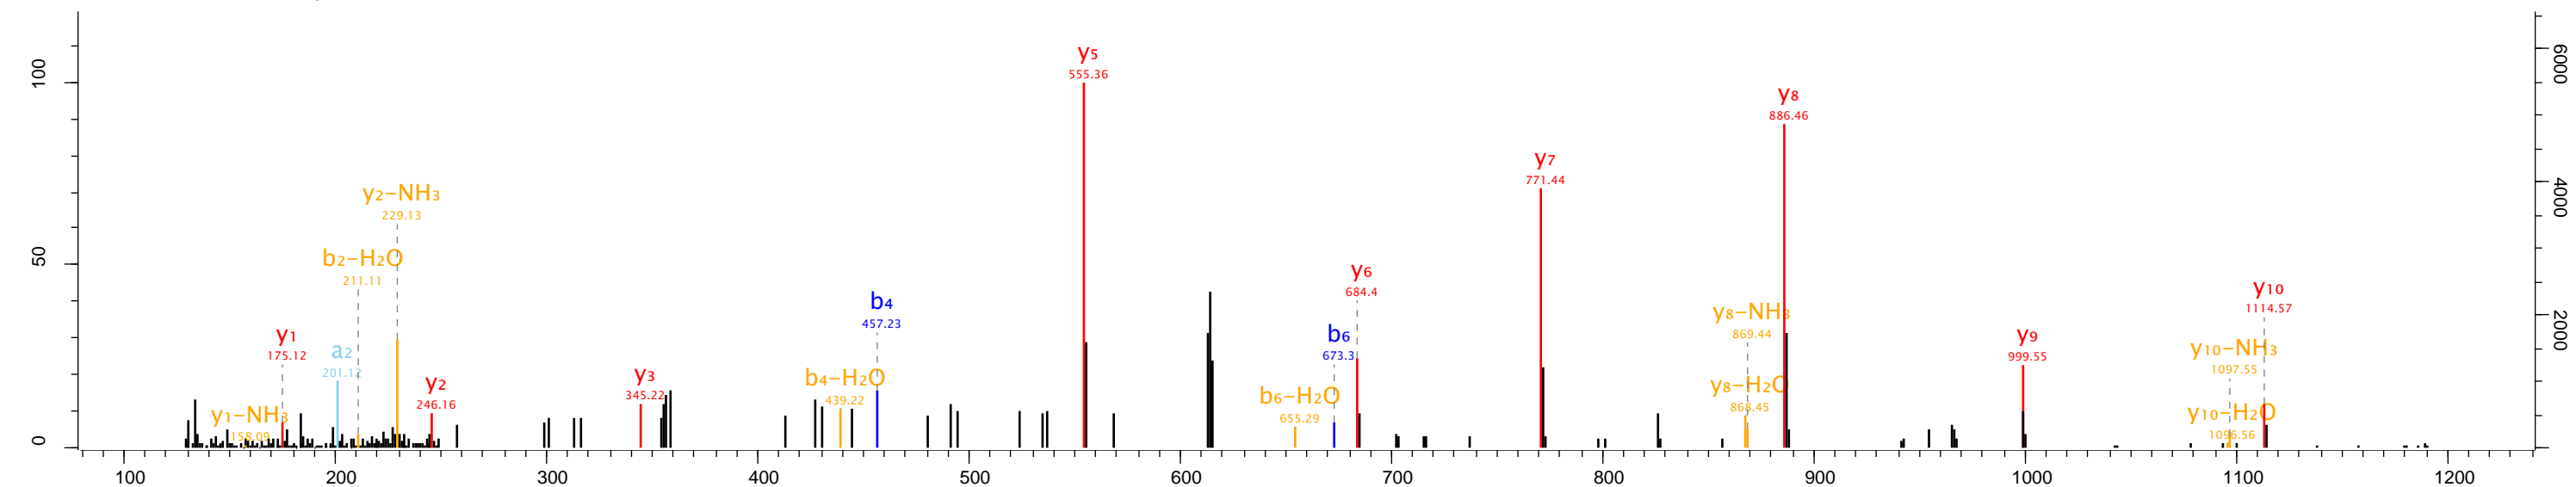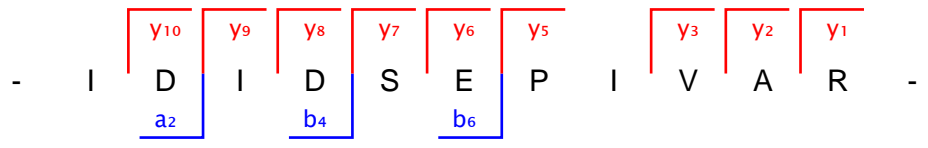

Spectral Annotation for Single-Peptide IDs in 16-cell Embryo using Q-OT-LIT

Raw file 2015-01-05\_CL02\_2Excl15sMaxInj70 Scan 16179 Method ITMS; HCD Score 111.86 m/z 614.33

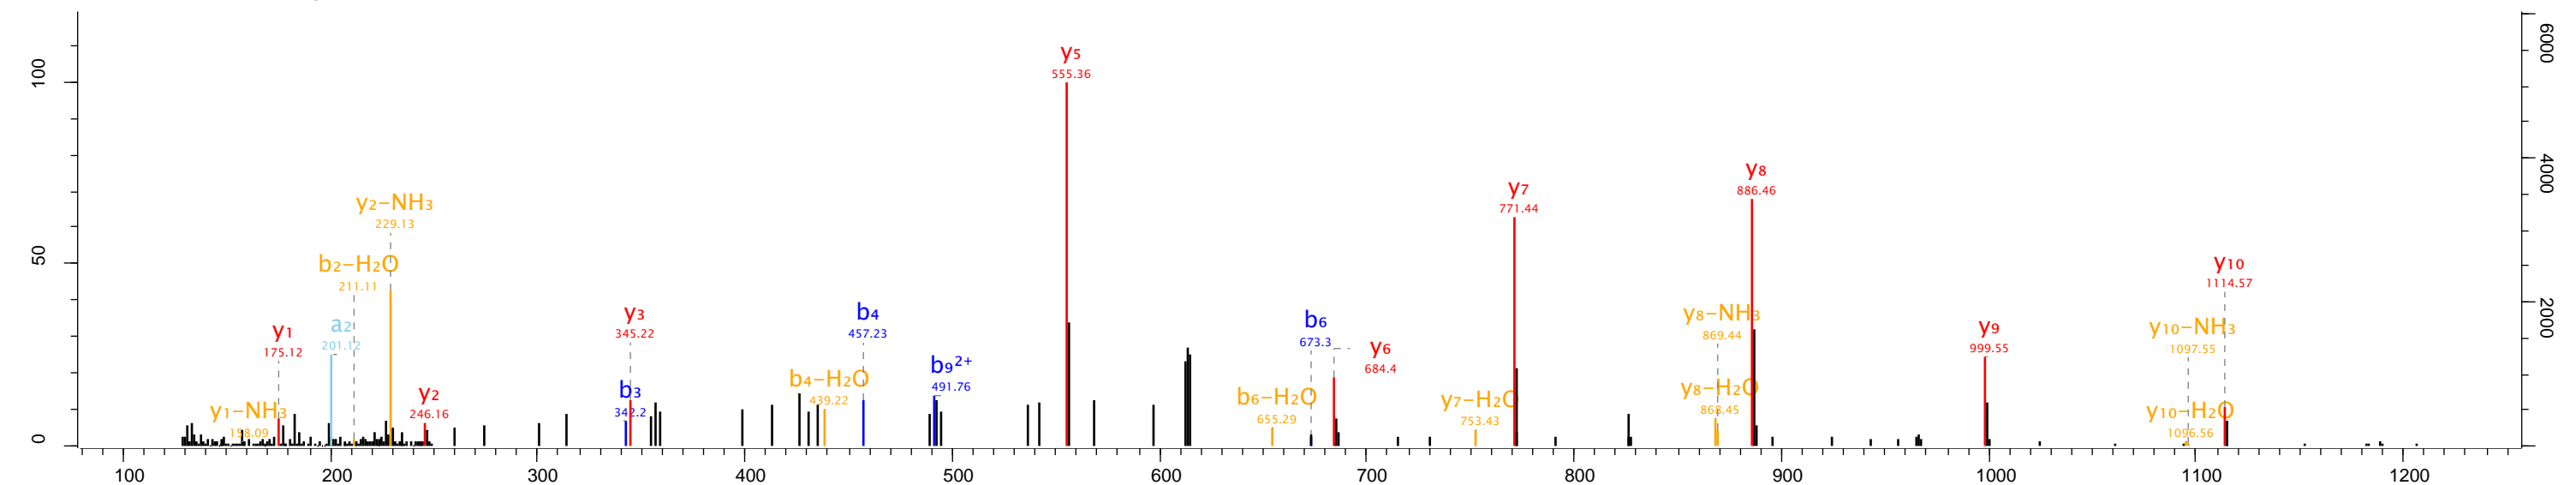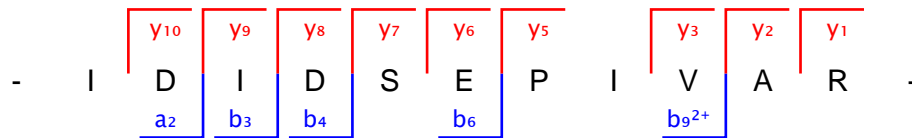

Spectral Annotation for Single-Peptide IDs in 16-cell Embryo using Q-OT-LIT

Raw file 2015-01-05\_CL02\_2Excl15sMaxInj70 Scan 16196 Method ITMS; HCD Score 122.55 m/z 632.82

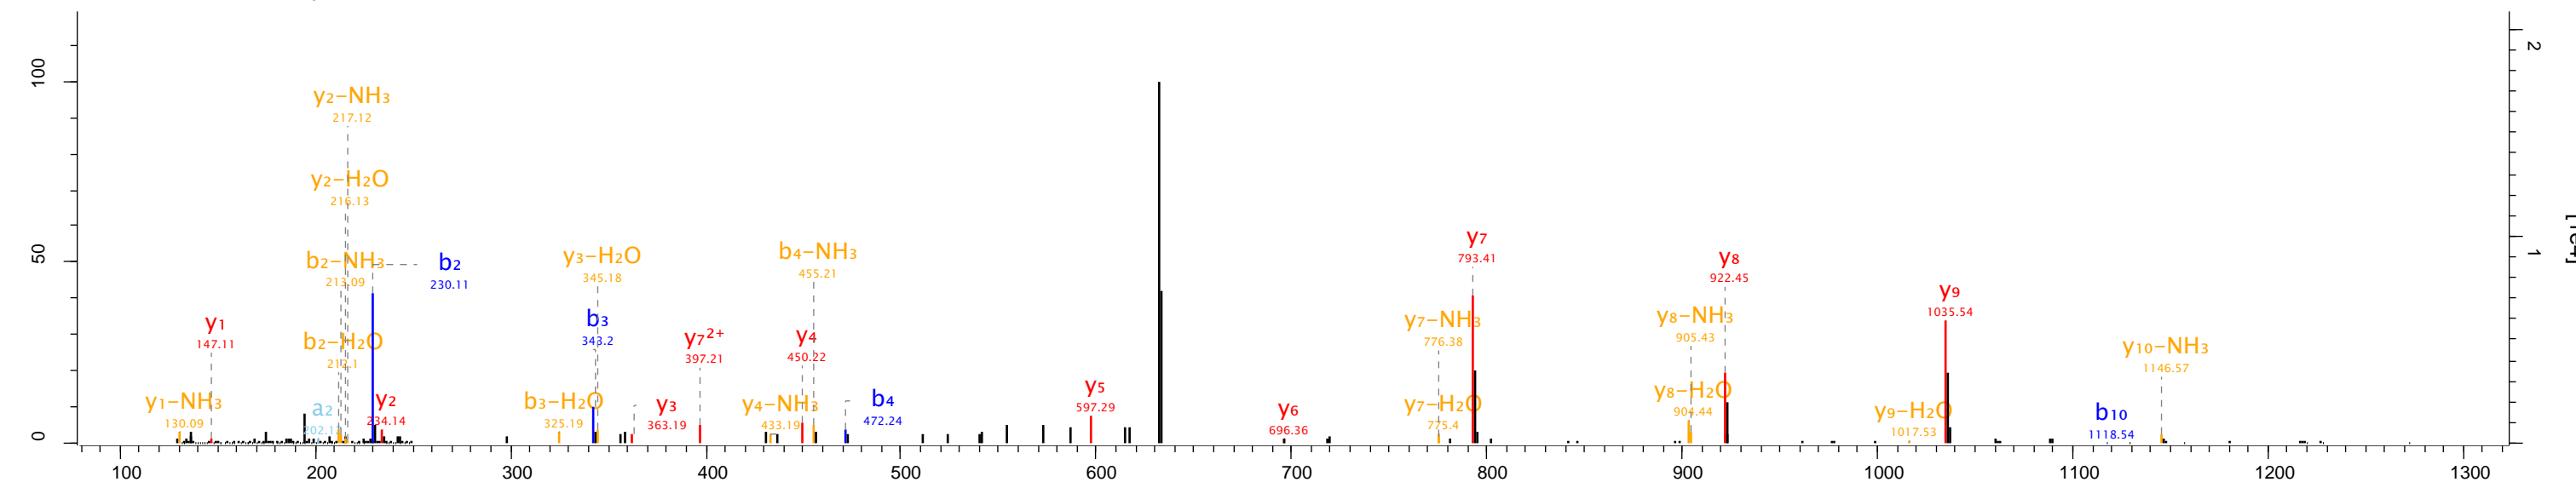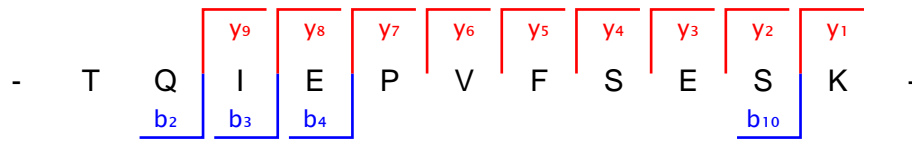

Spectral Annotation for Single-Peptide IDs in 16-cell Embryo using Q-OT-LIT

Raw file 2015-01-05\_CL02\_2Excl15sMaxInj70 Scan 16270 Method ITMS; HCD Score 71.15 m/z 650.84

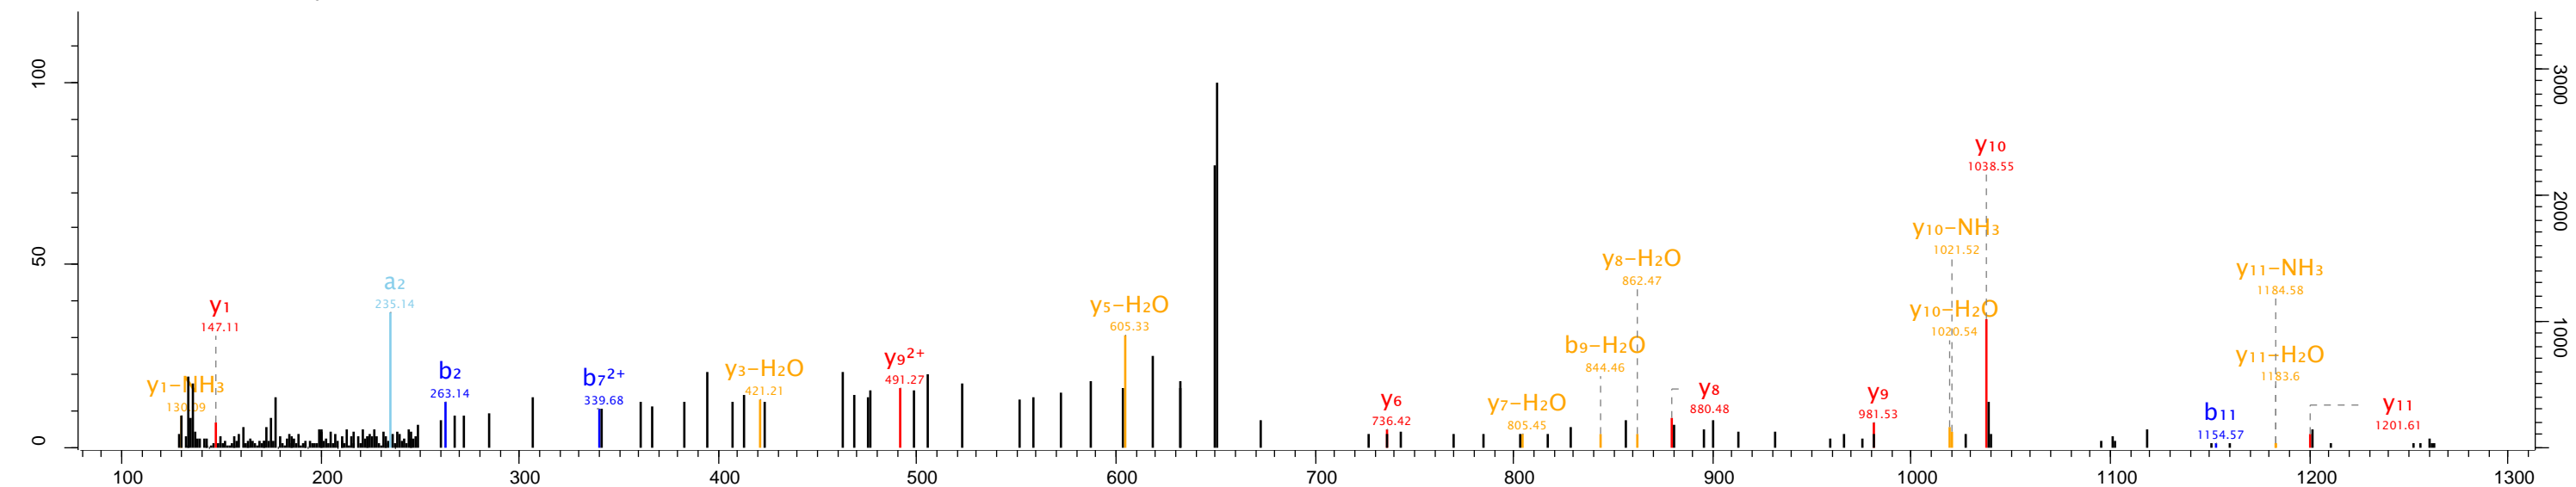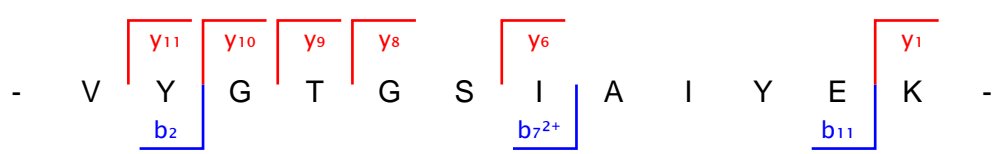

Spectral Annotation for Single-Peptide IDs in 16-cell Embryo using Q-OT-LIT

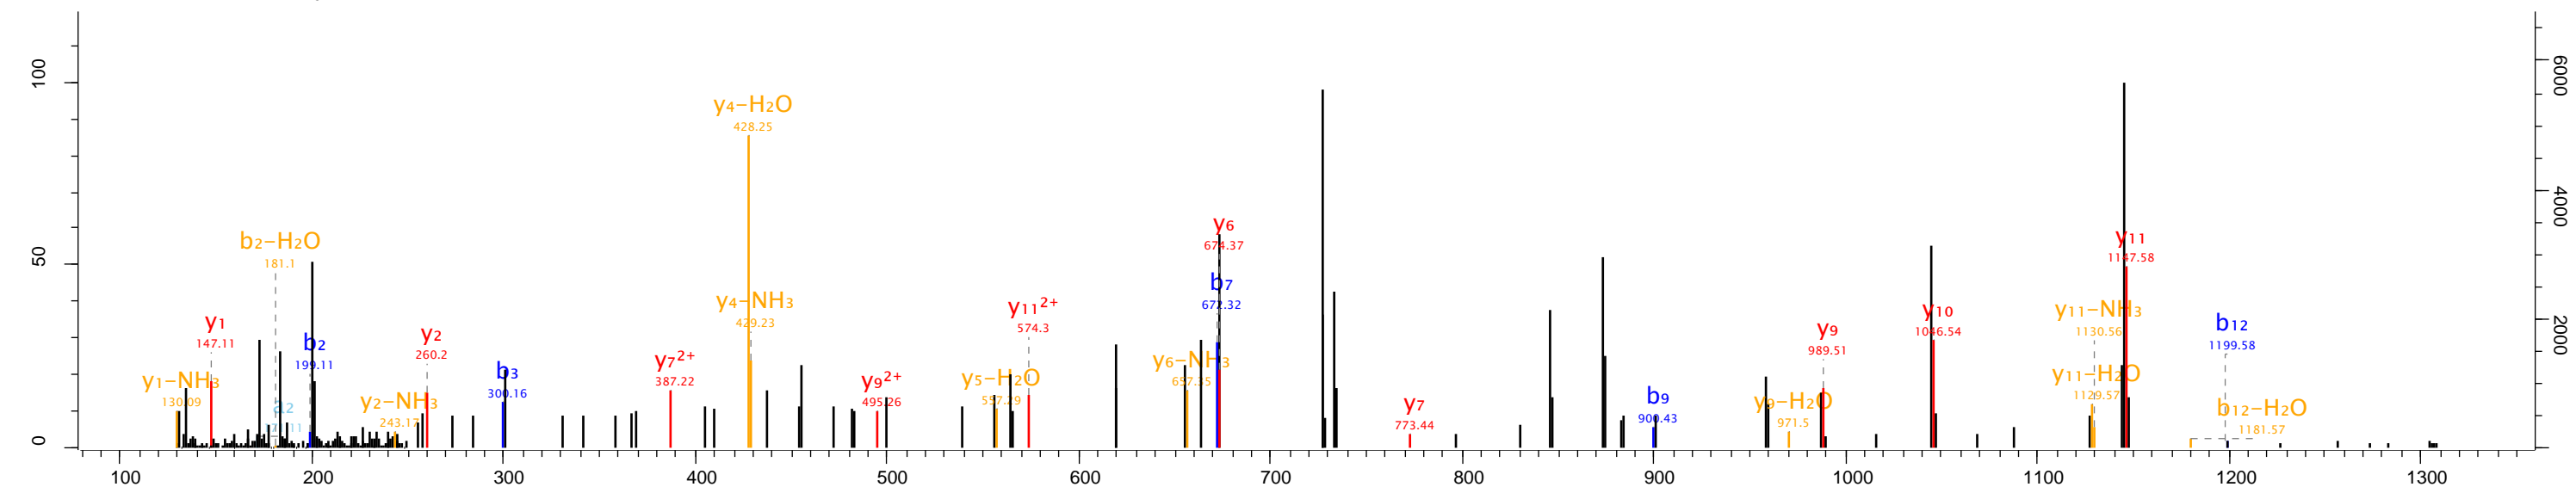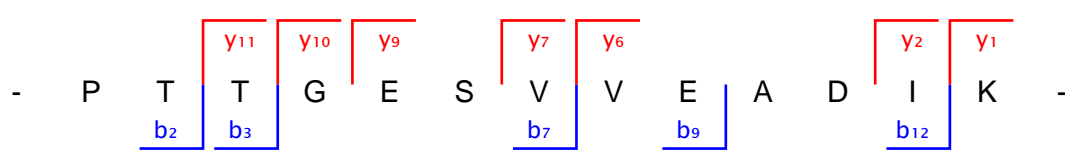



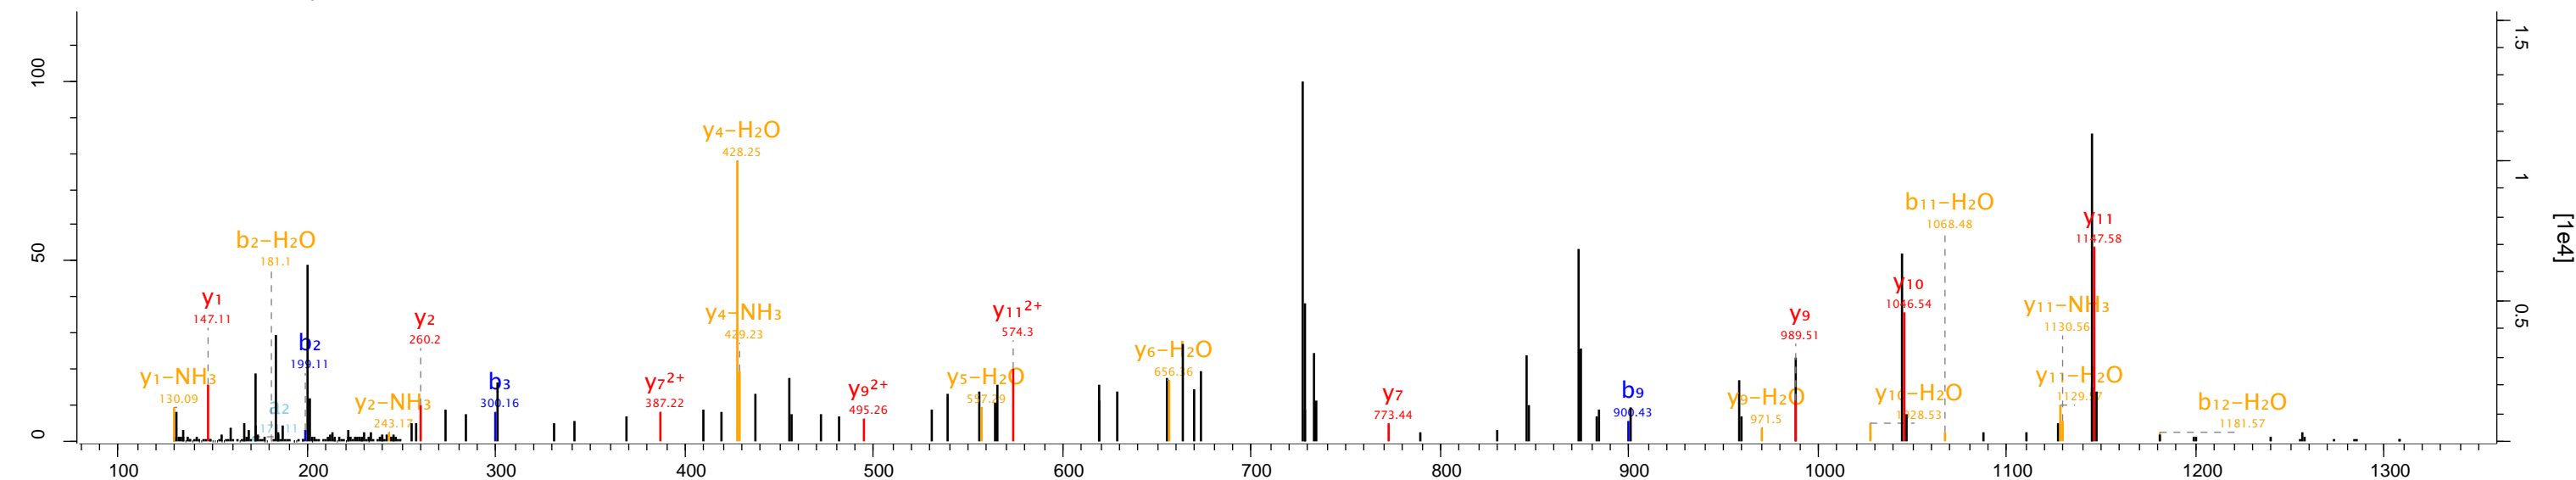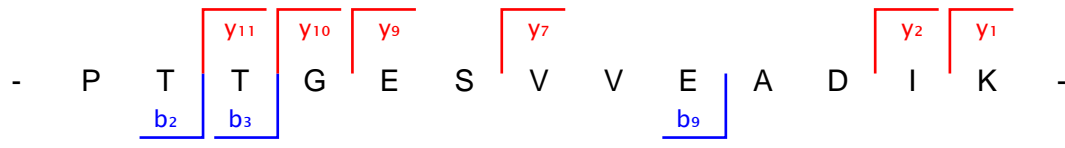

Raw file 2015-01-05\_CL02\_2Excl15sMaxInj70 Scan 16540 Method ITMS; HCD Score 110.92 m/z 660.36

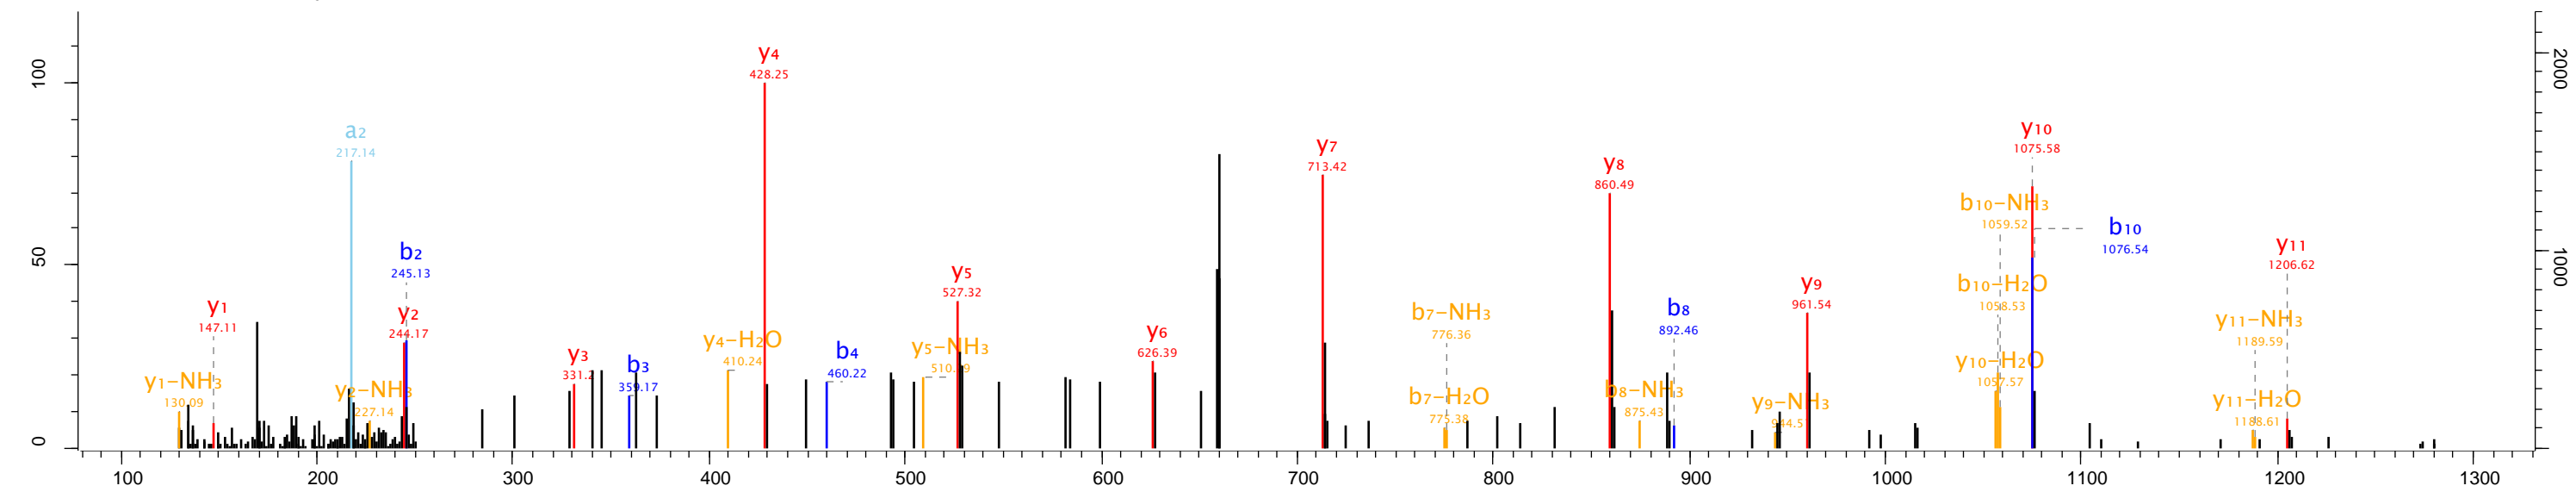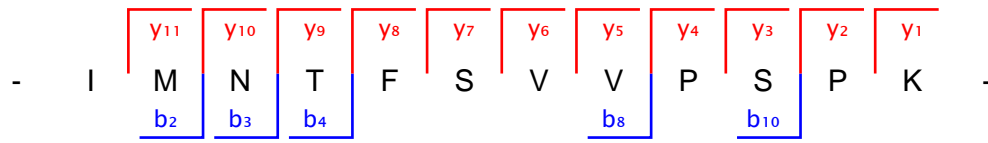

Raw file: 2015-01-05\_CL02\_2Excl15sMaxInj70  
 Scan: 16550 Method: ITMS; HCD Score: 61.42 m/z: 934.12

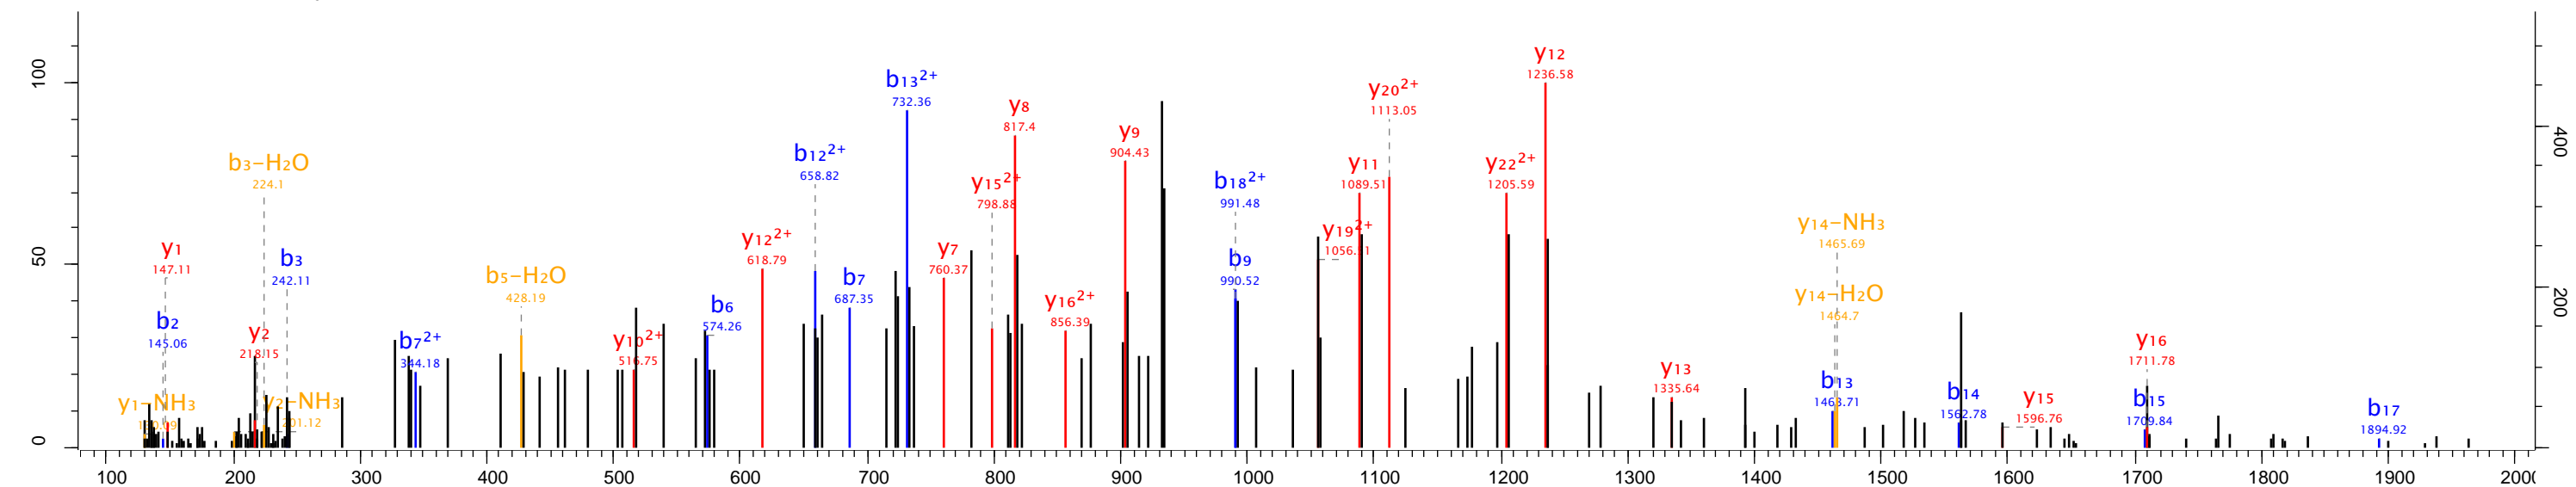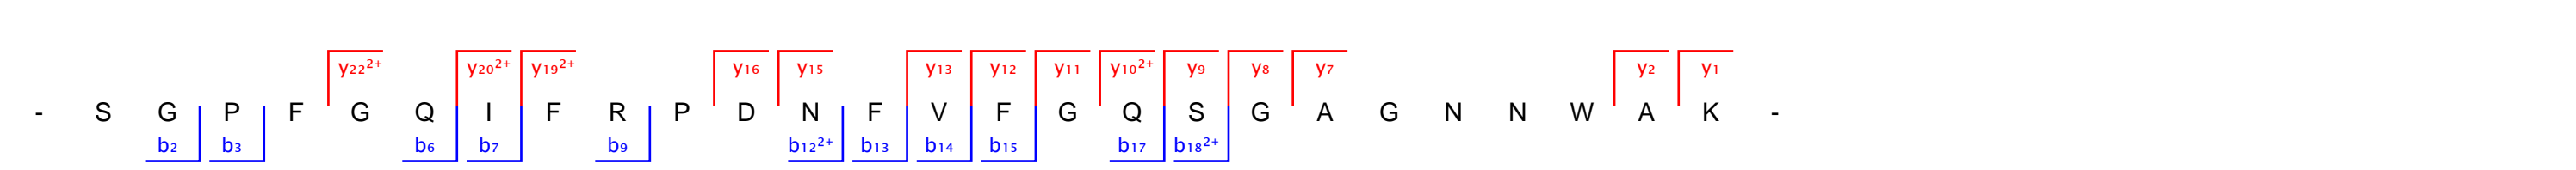

Spectral Annotation for Single-Peptide IDs in 16-cell Embryo using Q-OT-LIT

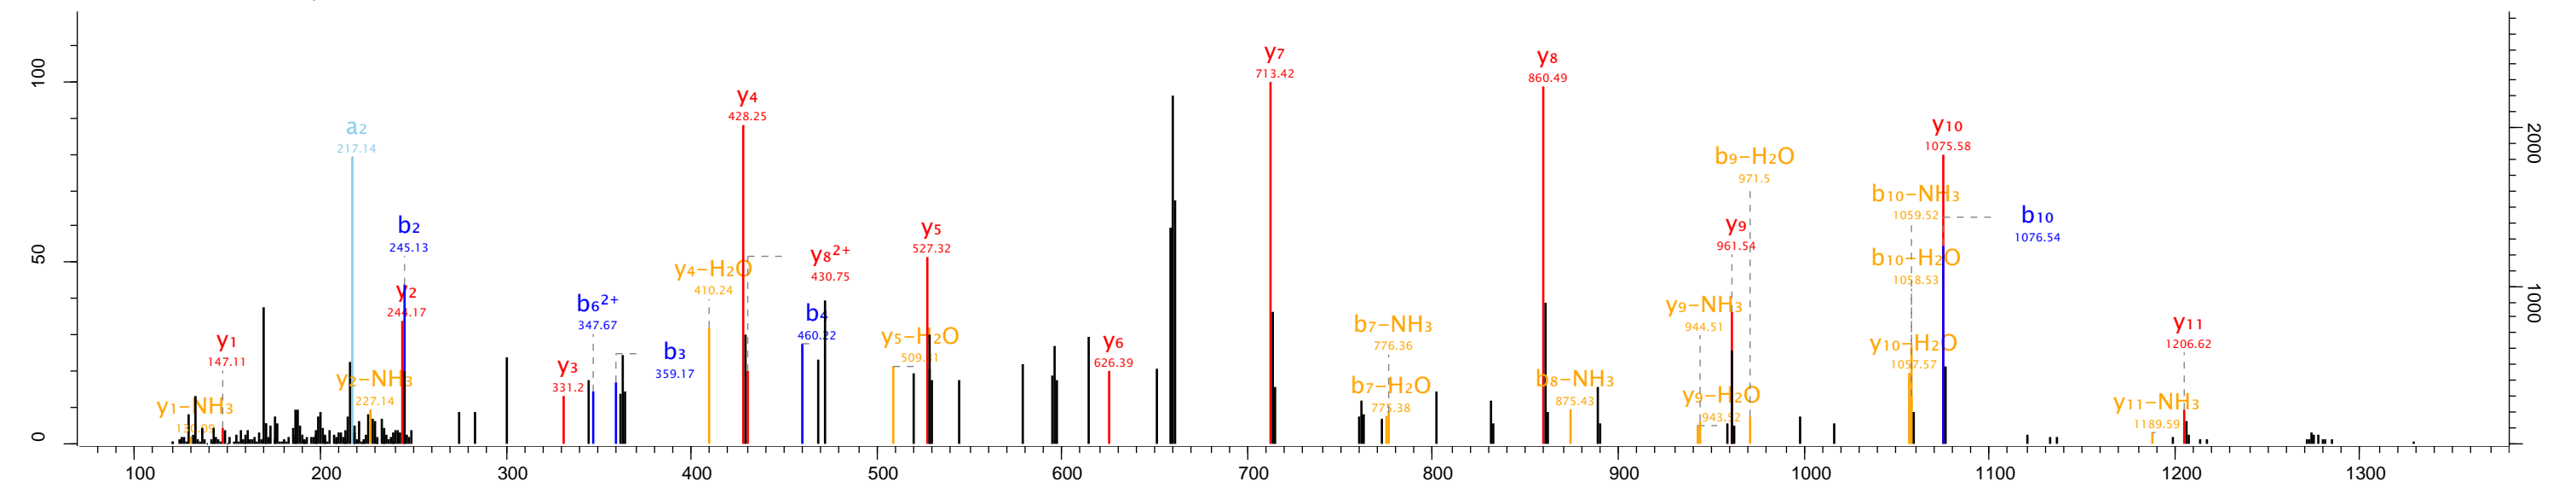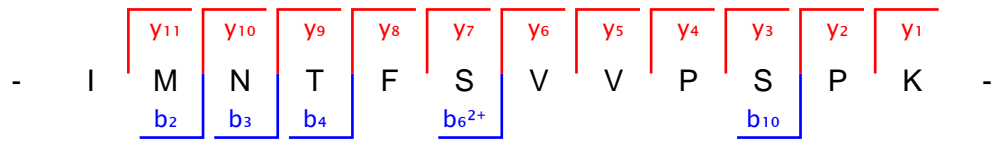

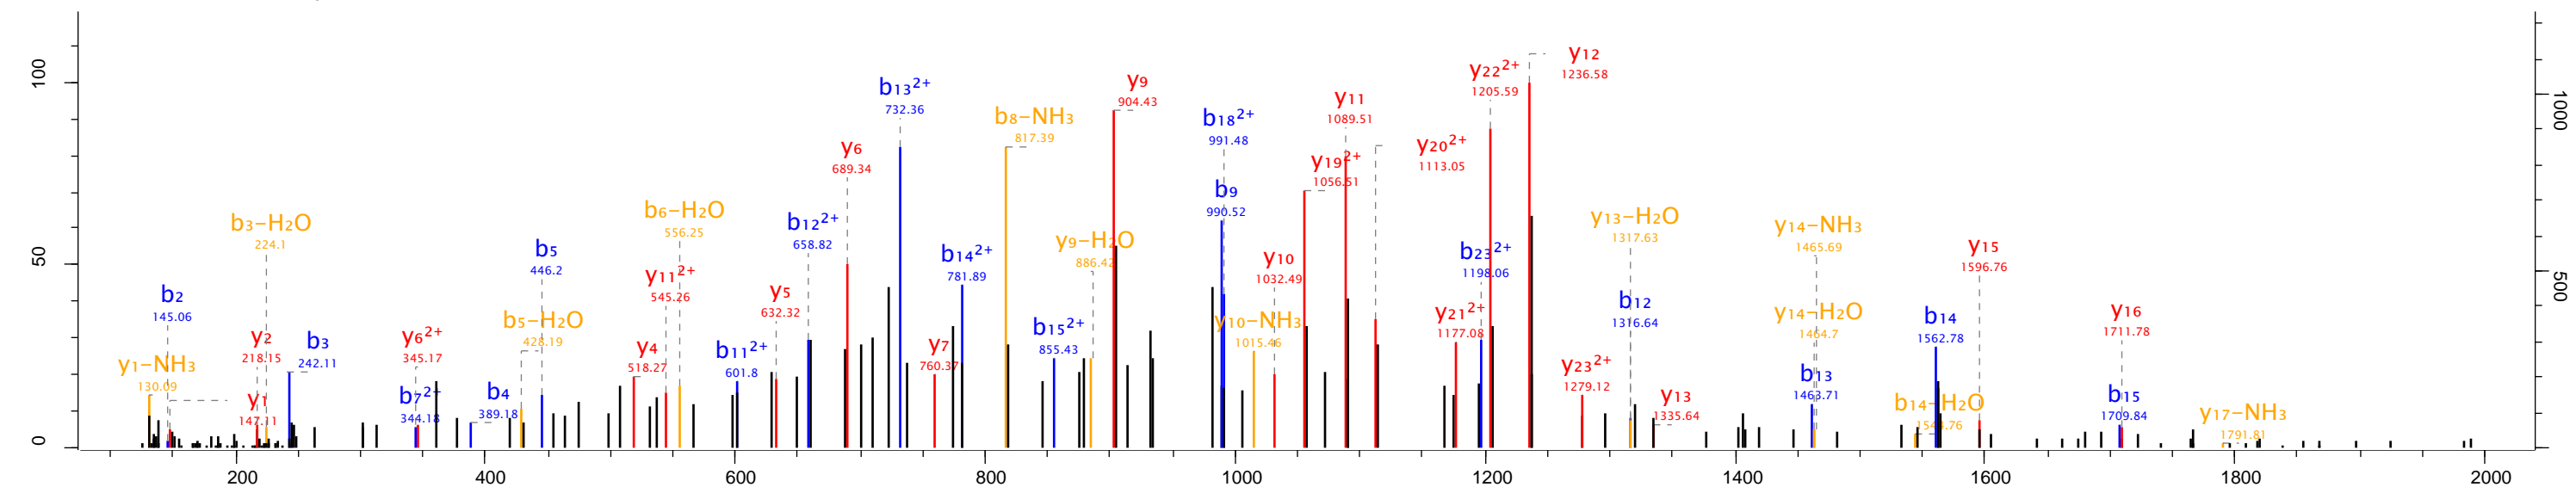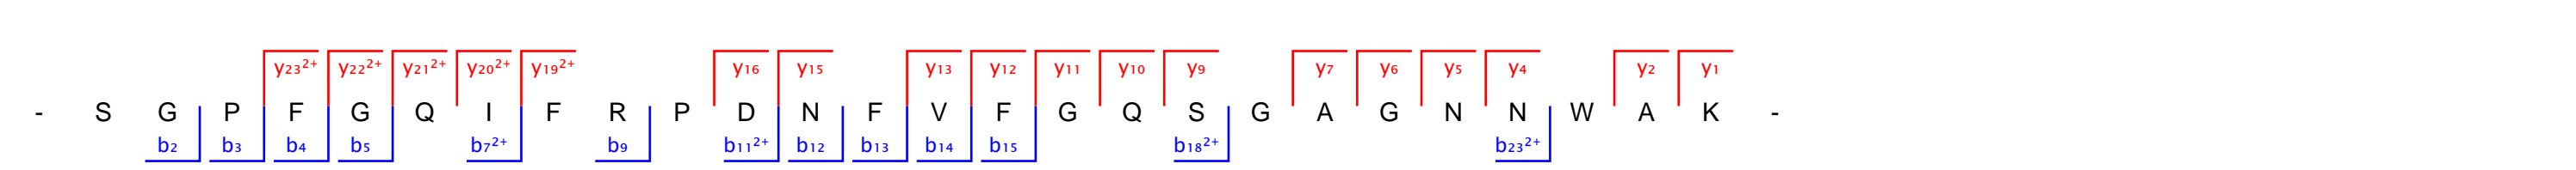

Raw file: 2015-01-05\_CL02\_2Excl15sMaxInj70  
 Scan: 16617 Method: ITMS; HCD Score: 156.7 m/z: 933.79

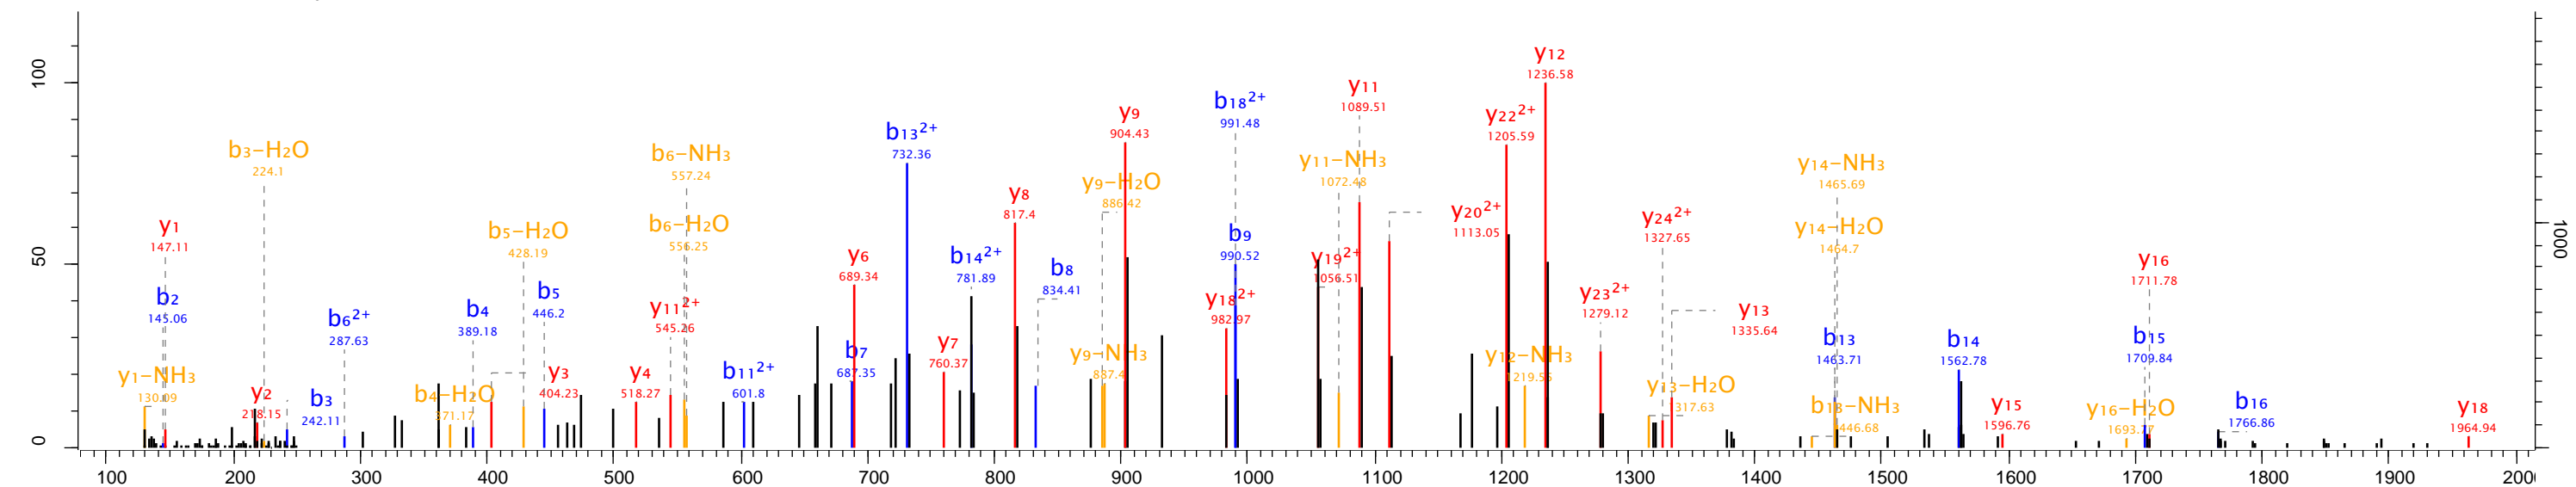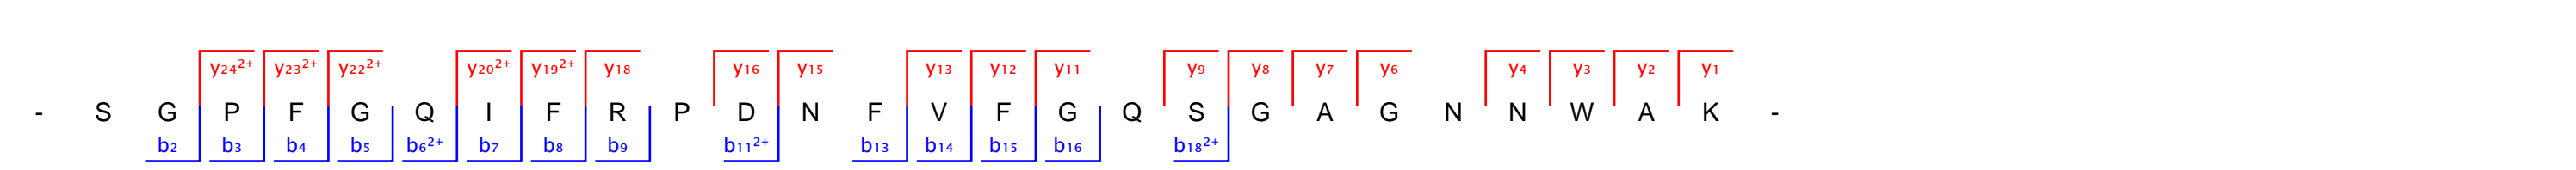

Spectral Annotation for Single-Peptide IDs in 16-cell Embryo using Q-OT-LIT

Raw file: 2015-01-05\_CL02\_2Excl15sMaxInj70  
 Scan: 16618 Method: ITMS; HCD Score: 81.55 m/z: 840.13

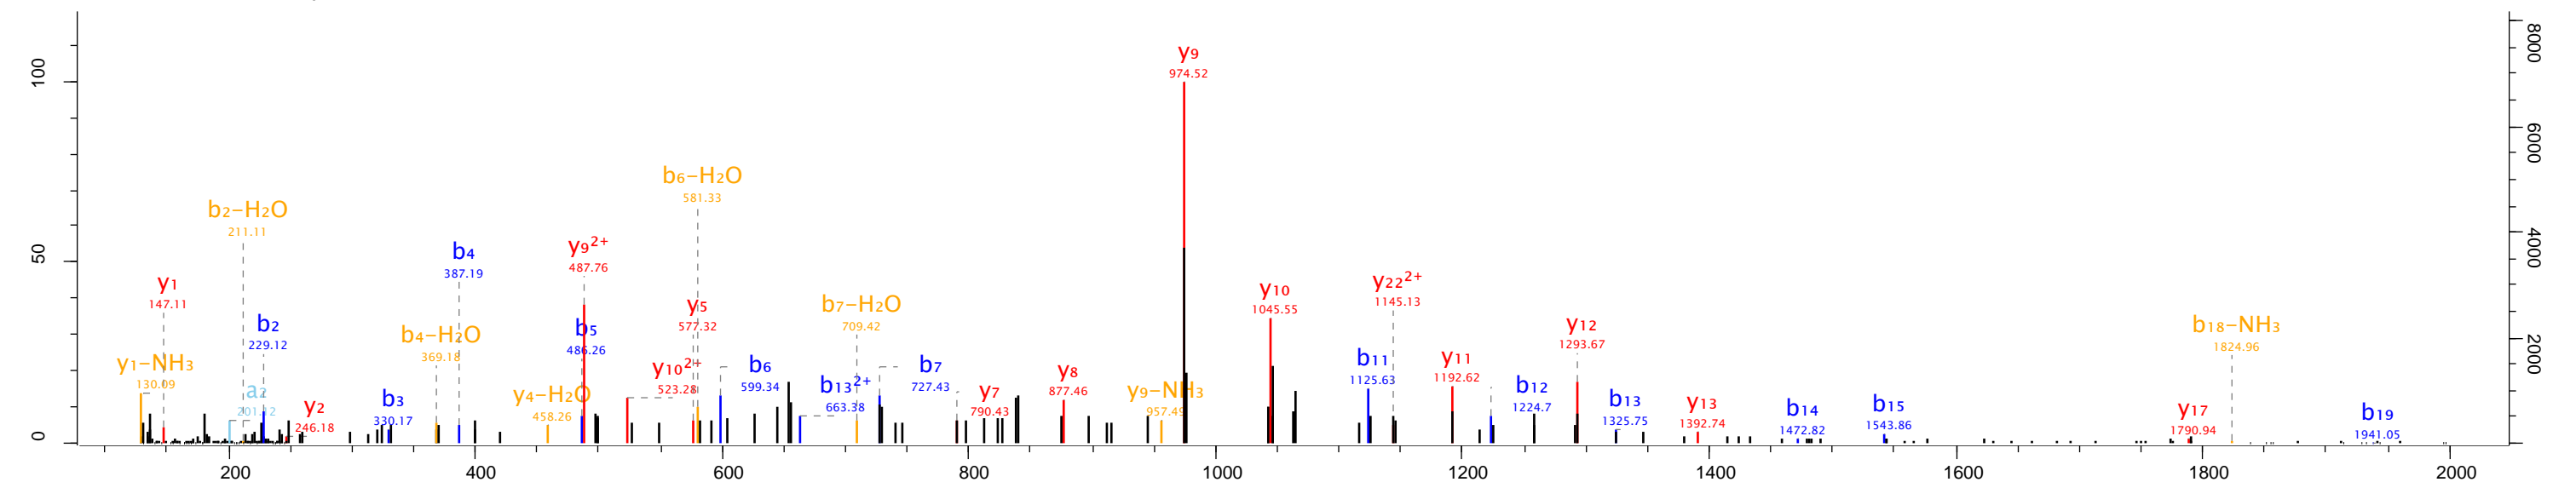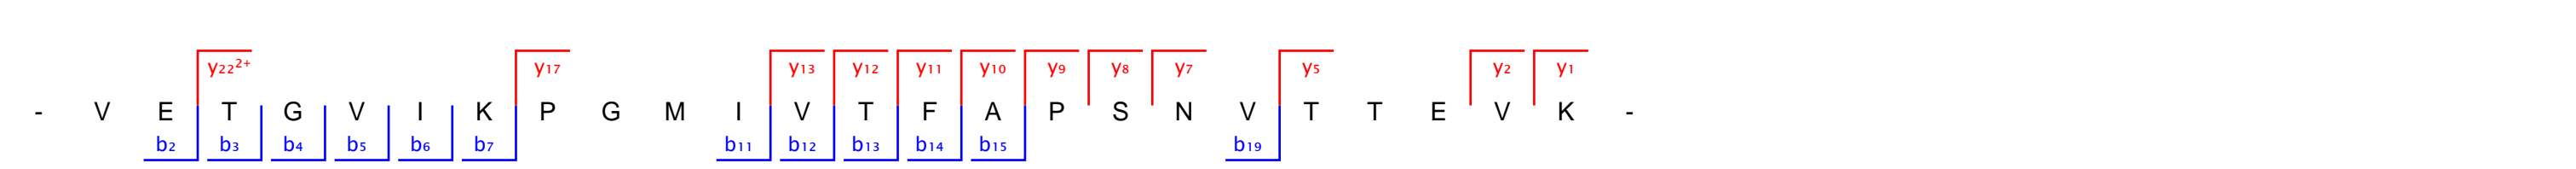

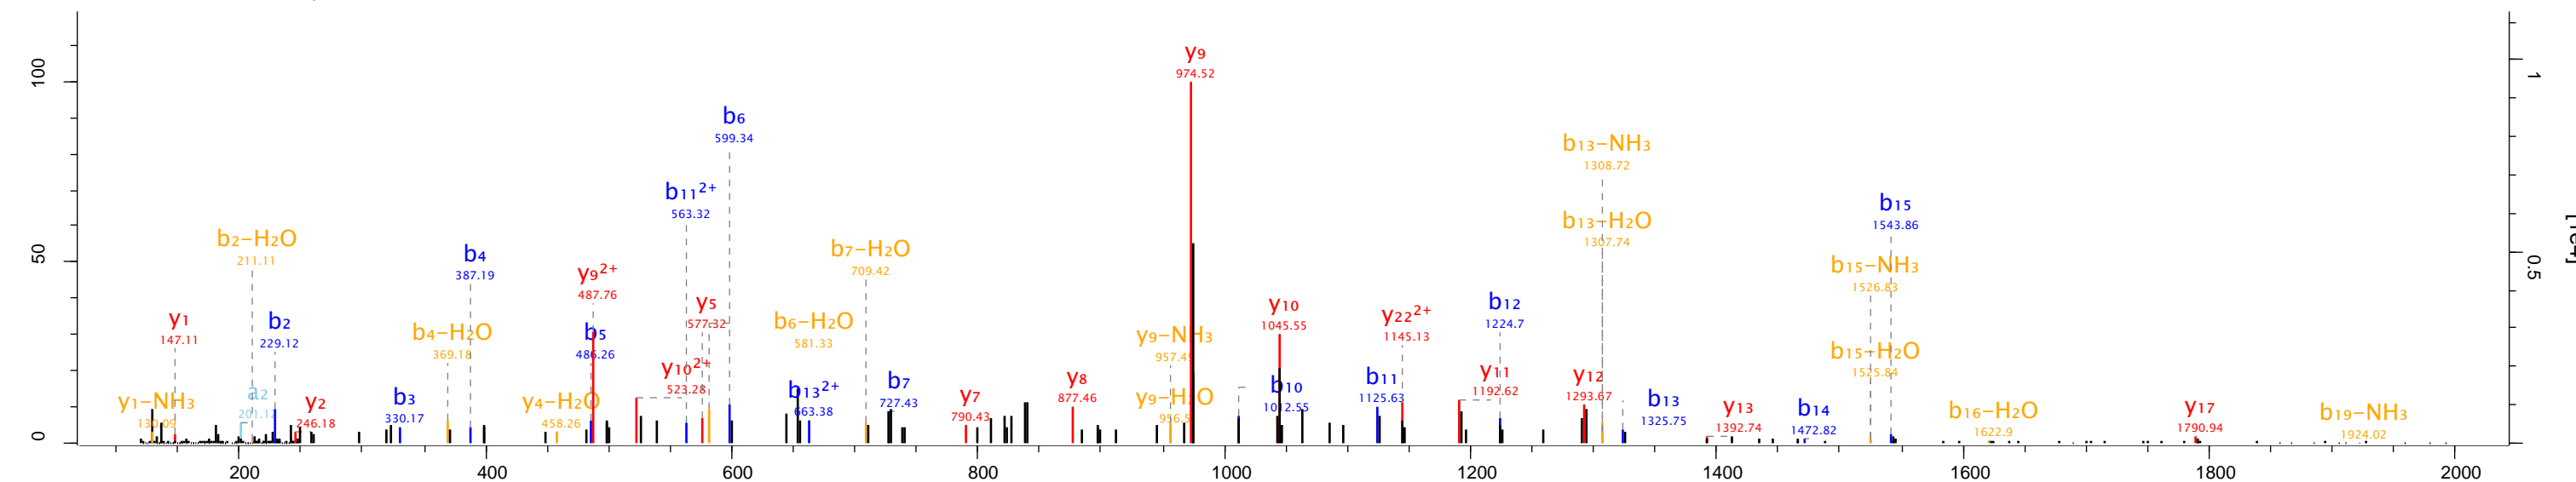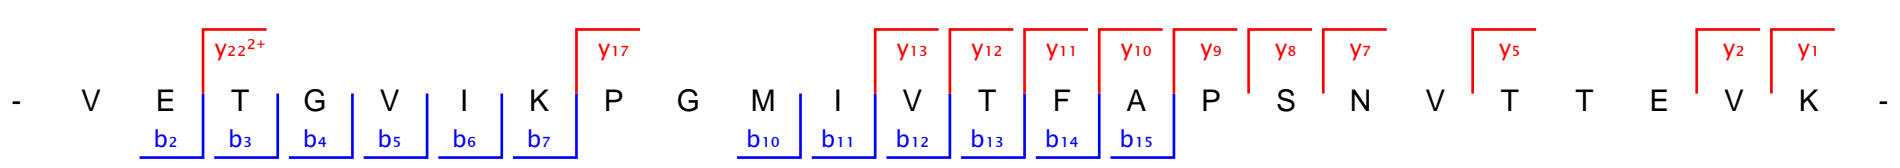



Raw file 2015-01-05\_CL02\_2Excl15sMaxInj70 Scan 16679 Method ITMS; HCD Score 89.44 m/z 672.86

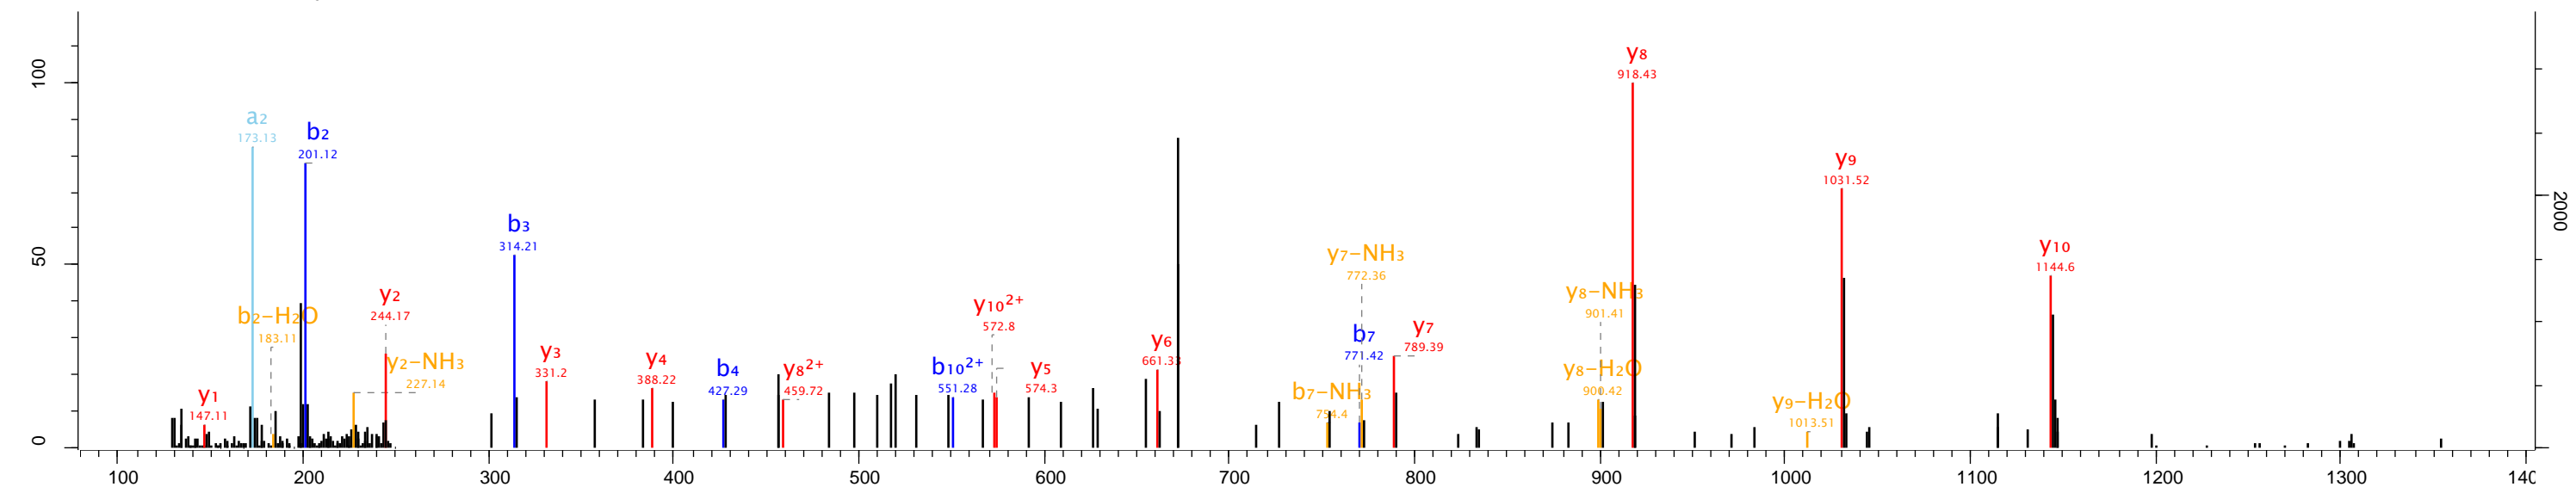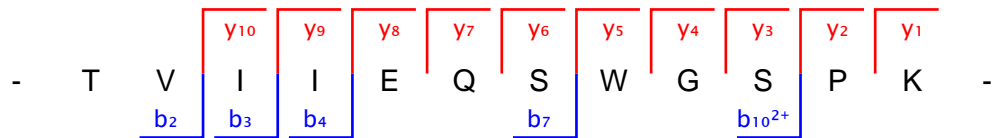

Spectral Annotation for Single-Peptide IDs in 16-cell Embryo using Q-OT-LIT

Raw file 2015-01-05\_CL02\_2Excl15sMaxInj70 Scan 16692 Method ITMS; HCD Score 129.74 m/z 840.12

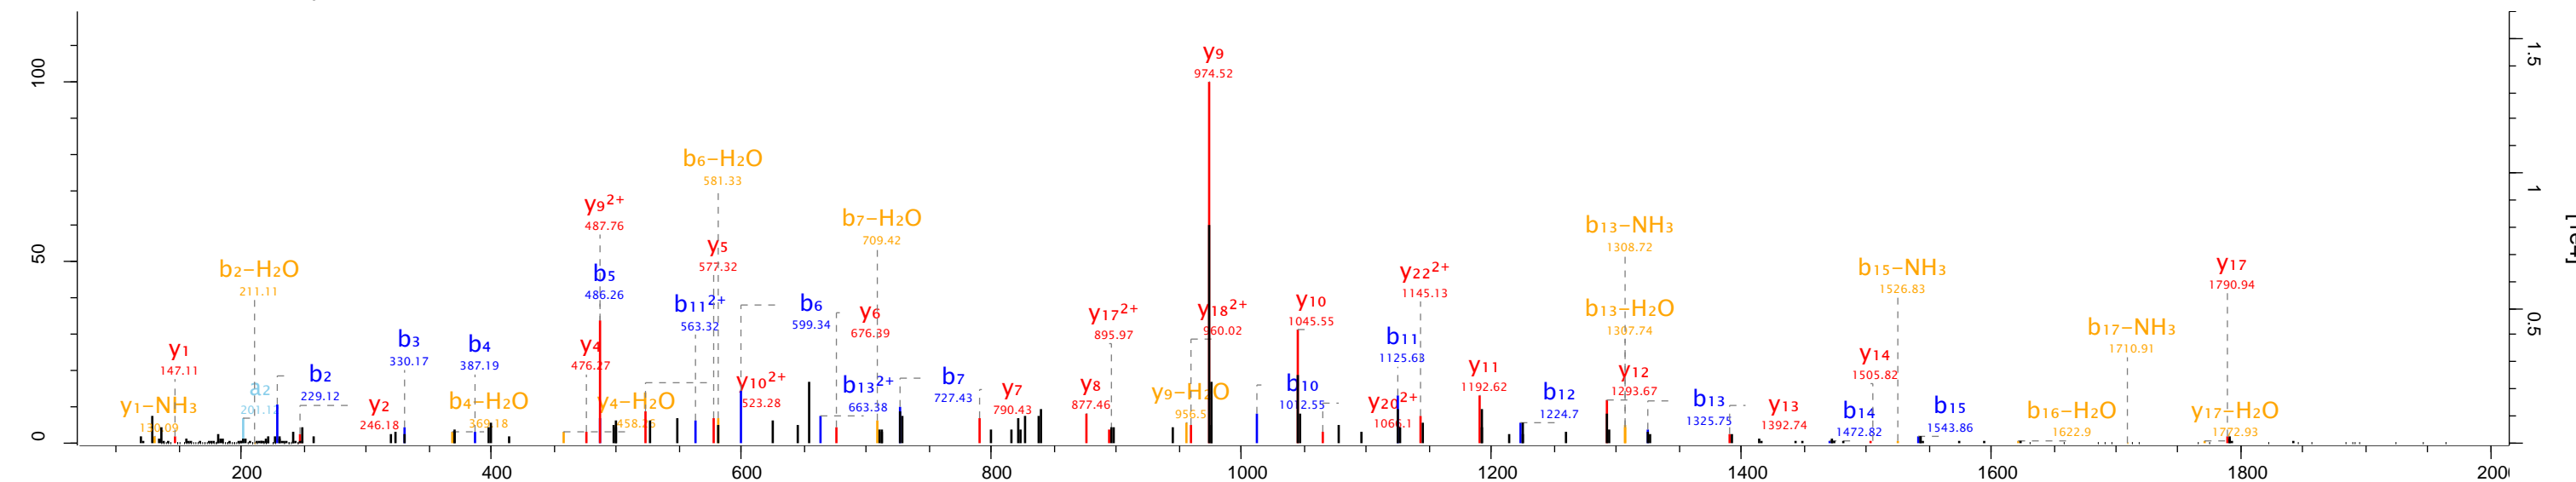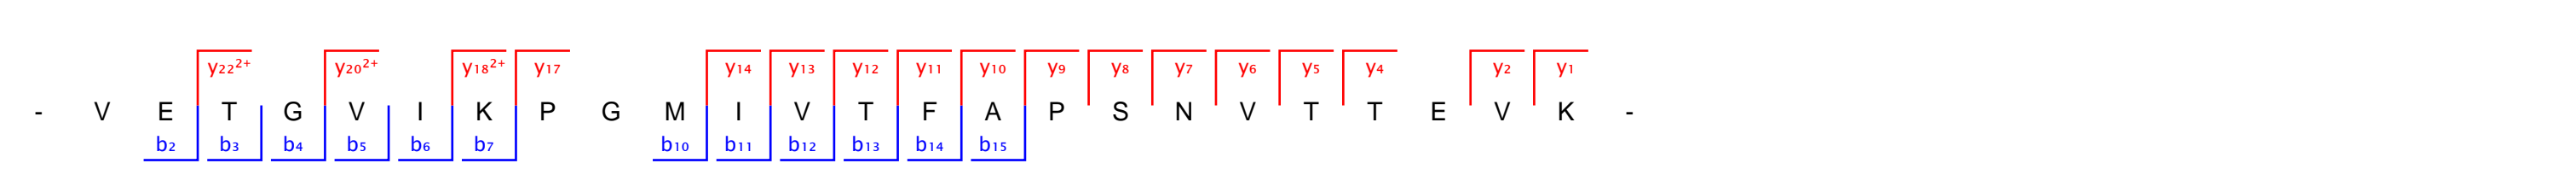

Spectral Annotation for Single-Peptide IDs in 16-cell Embryo using Q-OT-LIT

Raw file 2015-01-05\_CL02\_2Excl15sMaxInj70 Scan 16699 Method ITMS; HCD Score 49.62 m/z 1077.01

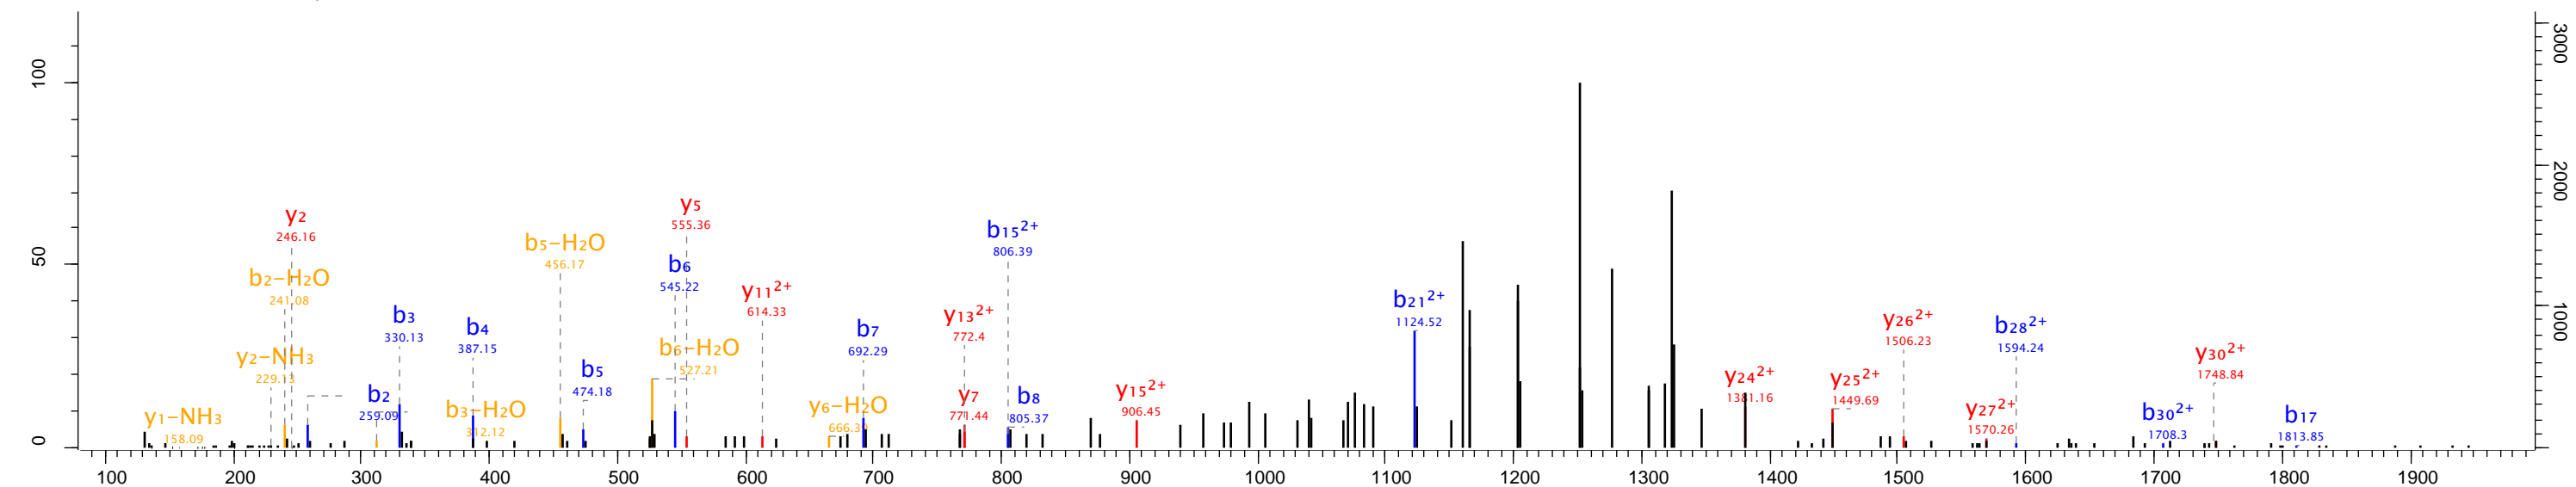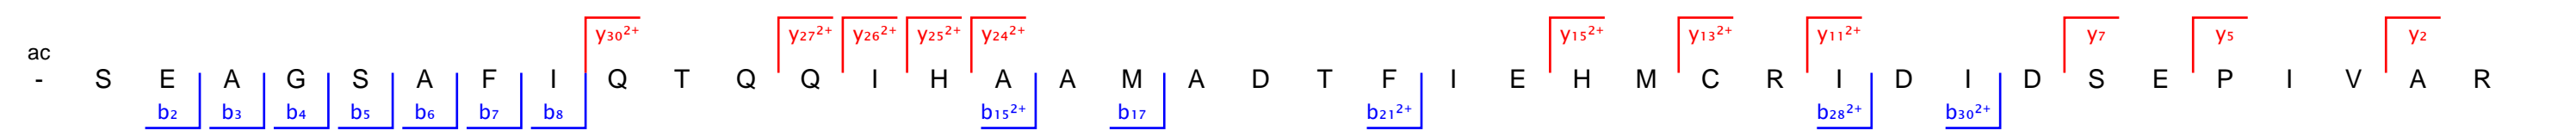

Raw file 2015-01-05\_CL02\_2Excl15sMaxInj70 Scan 16708 Method ITMS; HCD Score 66.02 m/z 660.35

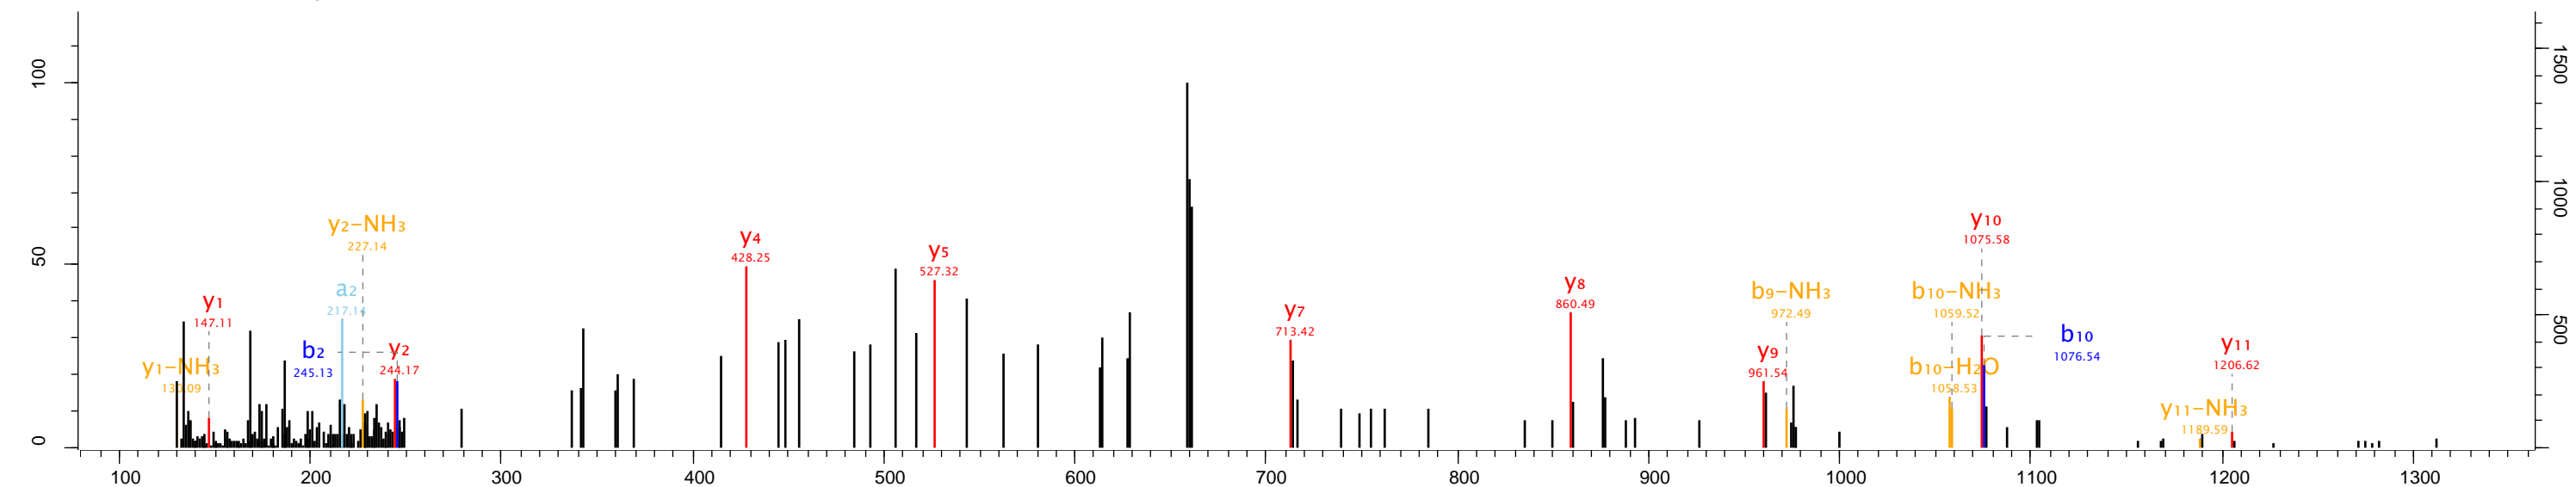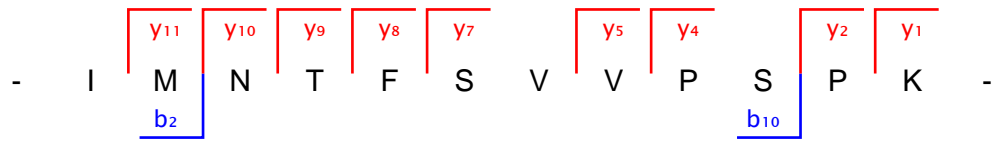

Raw file 2015-01-05\_CL02\_2Excl15sMaxInj70 Scan 16721 Method ITMS; HCD Score 44.95 m/z 1076.51

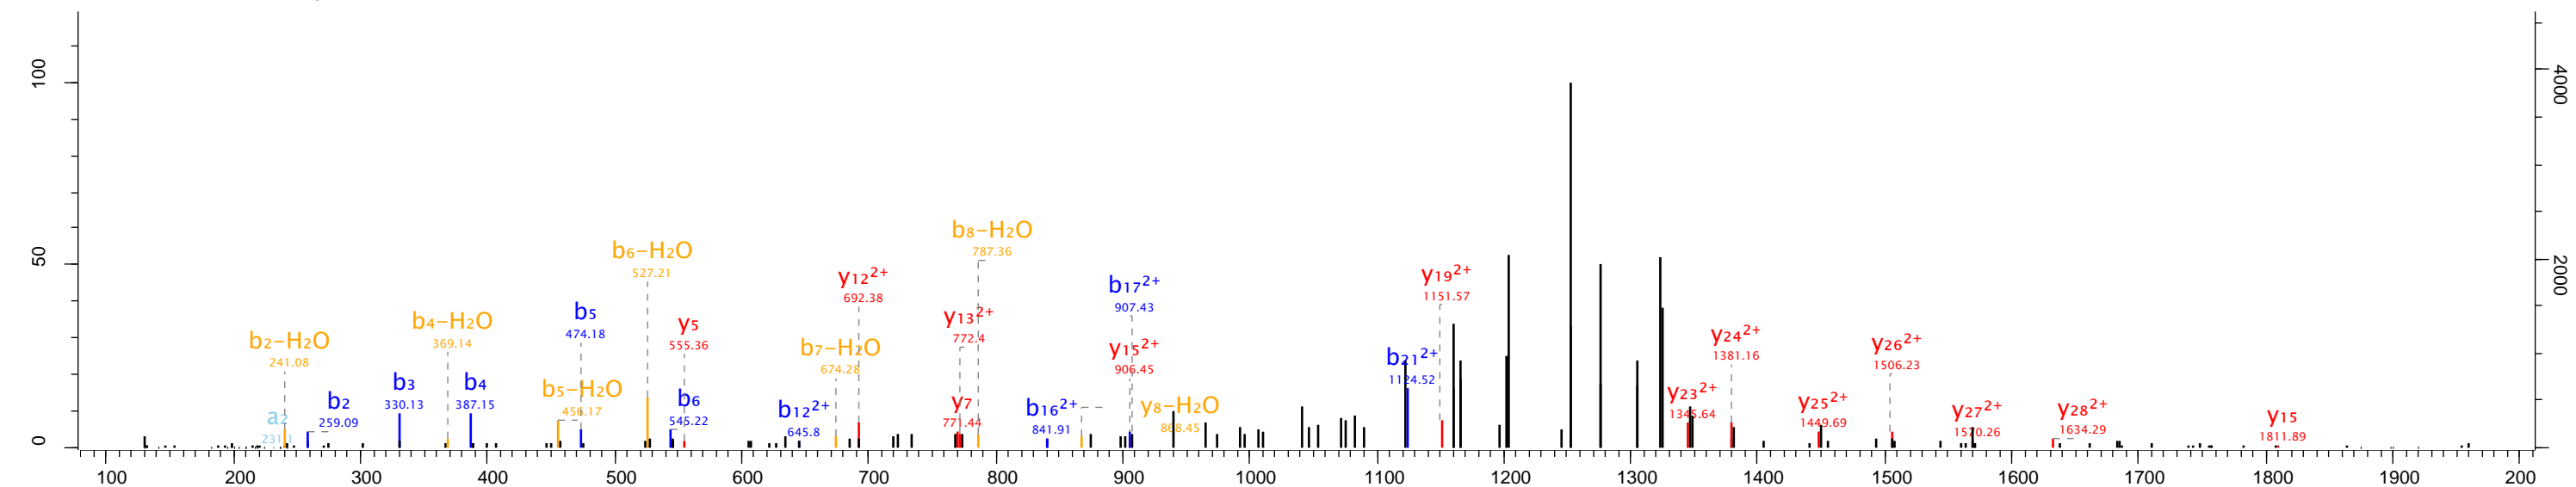

ac  
 - S E A G S A F I Q T Q Q I H A A M A D T F I E H M C R I D I D S E P I V A R  
 - b<sub>2</sub> b<sub>3</sub> b<sub>4</sub> b<sub>5</sub> b<sub>6</sub> b<sub>12</sub><sup>2+</sup> b<sub>16</sub><sup>2+</sup> b<sub>17</sub><sup>2+</sup> b<sub>21</sub><sup>2+</sup> y<sub>19</sub><sup>2+</sup> y<sub>23</sub><sup>2+</sup> y<sub>24</sub><sup>2+</sup> y<sub>25</sub><sup>2+</sup> y<sub>26</sub><sup>2+</sup> y<sub>27</sub><sup>2+</sup> y<sub>28</sub><sup>2+</sup> y<sub>7</sub> y<sub>12</sub><sup>2+</sup> y<sub>13</sub><sup>2+</sup> y<sub>15</sub> y<sub>17</sub><sup>2+</sup>

- Spectral Annotation for Single-Peptide IDs in 16-cell Embryo using Q-OT-LIT

C. Lombard-Banek, S. Reddy, S. A. Moody, P. Nemes, Mol. Cell. Prot. 2016

Raw file: 2015-01-05\_CL02\_2Excl15sMaxInj70  
 Scan: 16903 Method: ITMS; HCD Score: 112.5 m/z: 717.82

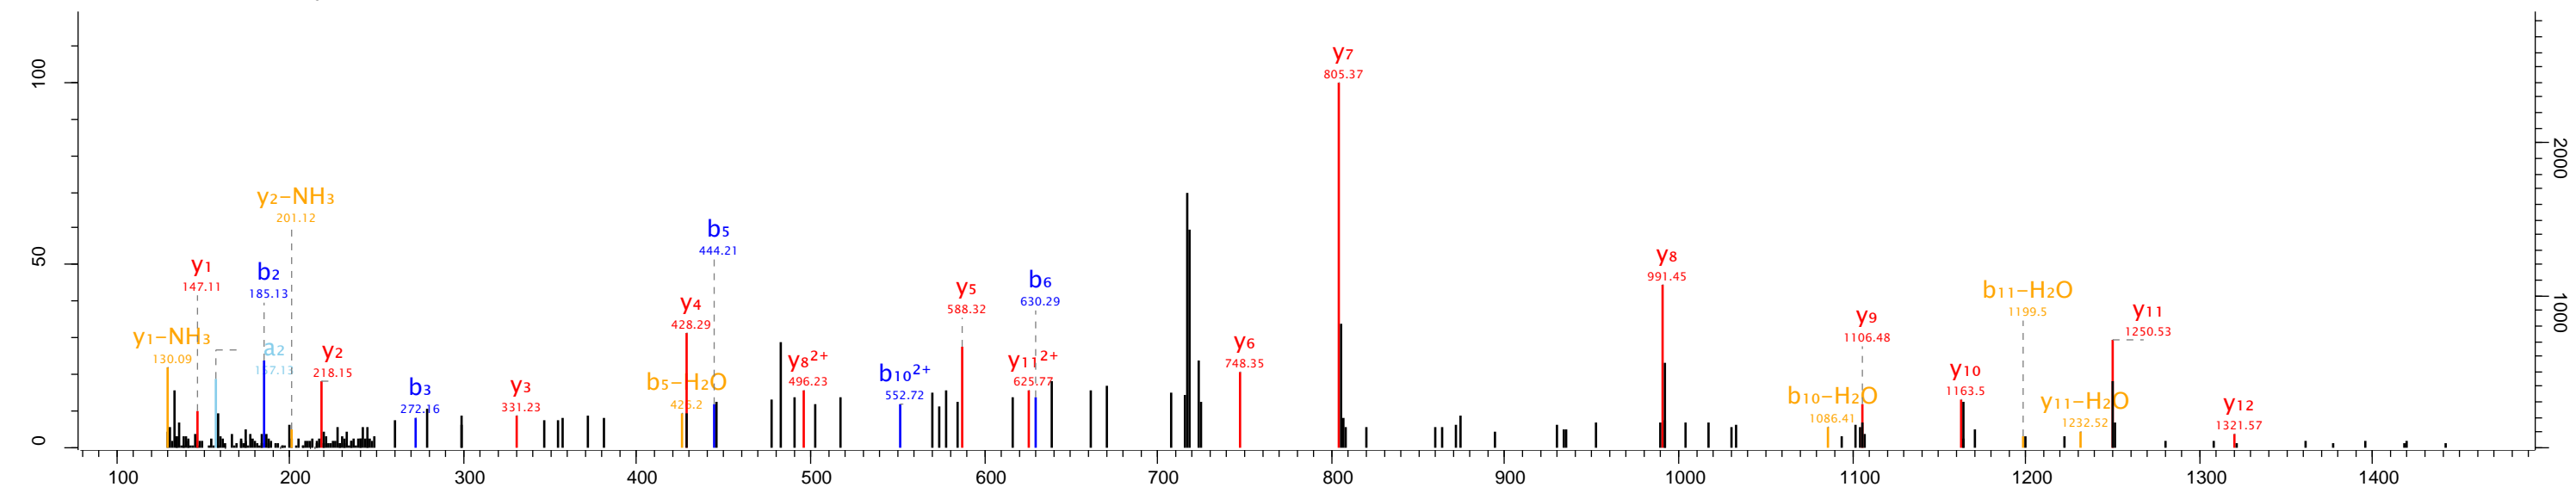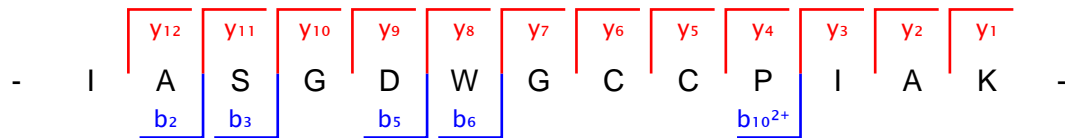

Spectral Annotation for Single-Peptide IDs in 16-cell Embryo using Q-OT-LIT

Raw file 2015-01-05\_CL02\_2Excl15sMaxInj70 Scan 16914 Method ITMS; HCD Score 69.92 m/z 666.85

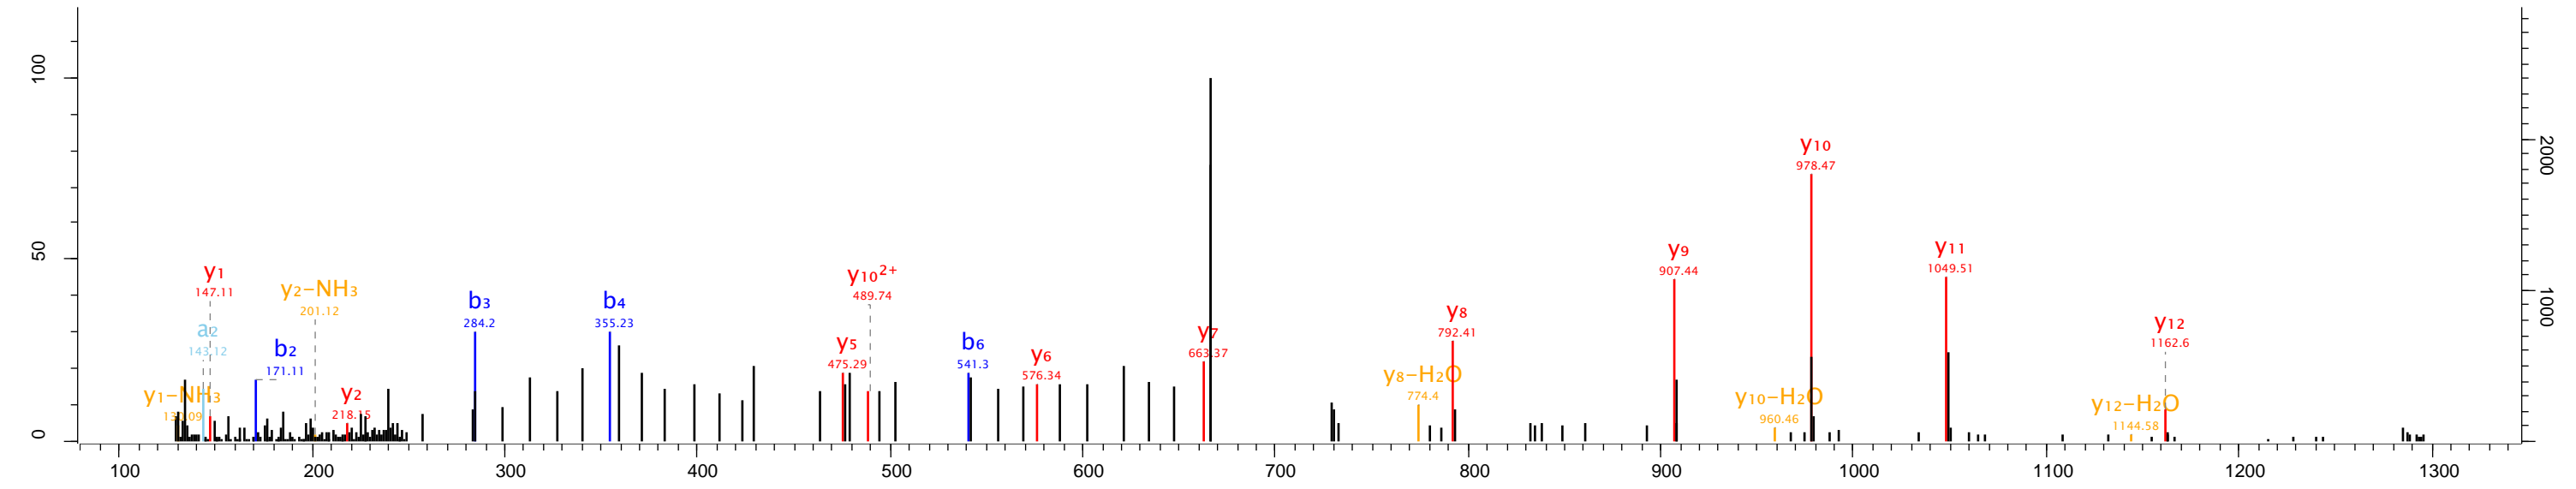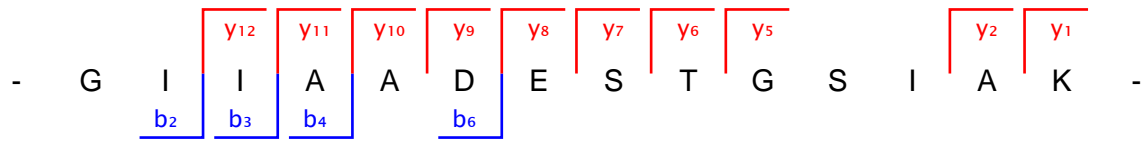

Spectral Annotation for Single-Peptide IDs in 16-cell Embryo using Q-OT-LIT

Raw file: 2015-01-05\_CL02\_2Excl15sMaxInj70  
 Scan: 16917 Method: ITMS; HCD Score: 107.39 m/z: 718.33

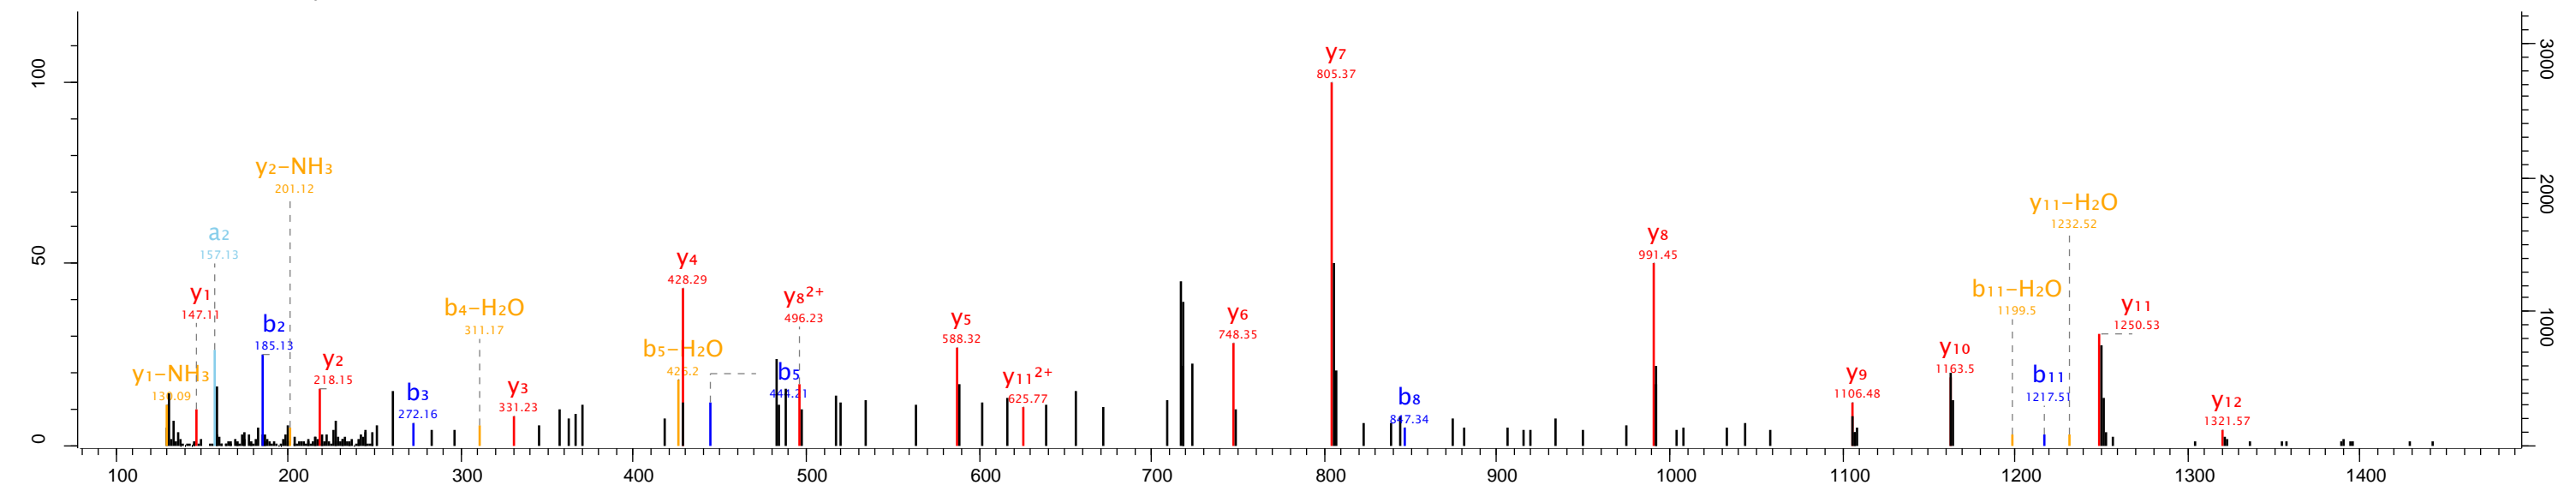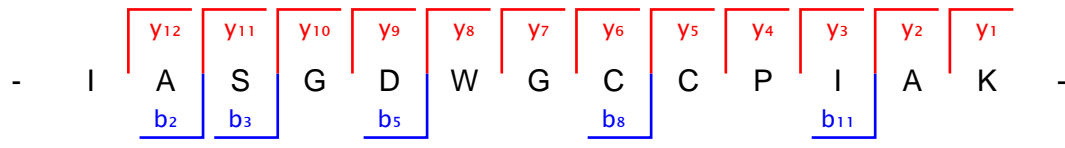



Raw file: 2015-01-05\_CL02\_2Excl15sMaxInj70  
 Scan: 16975 Method: ITMS; HCD Score: 82.52 m/z: 666.85

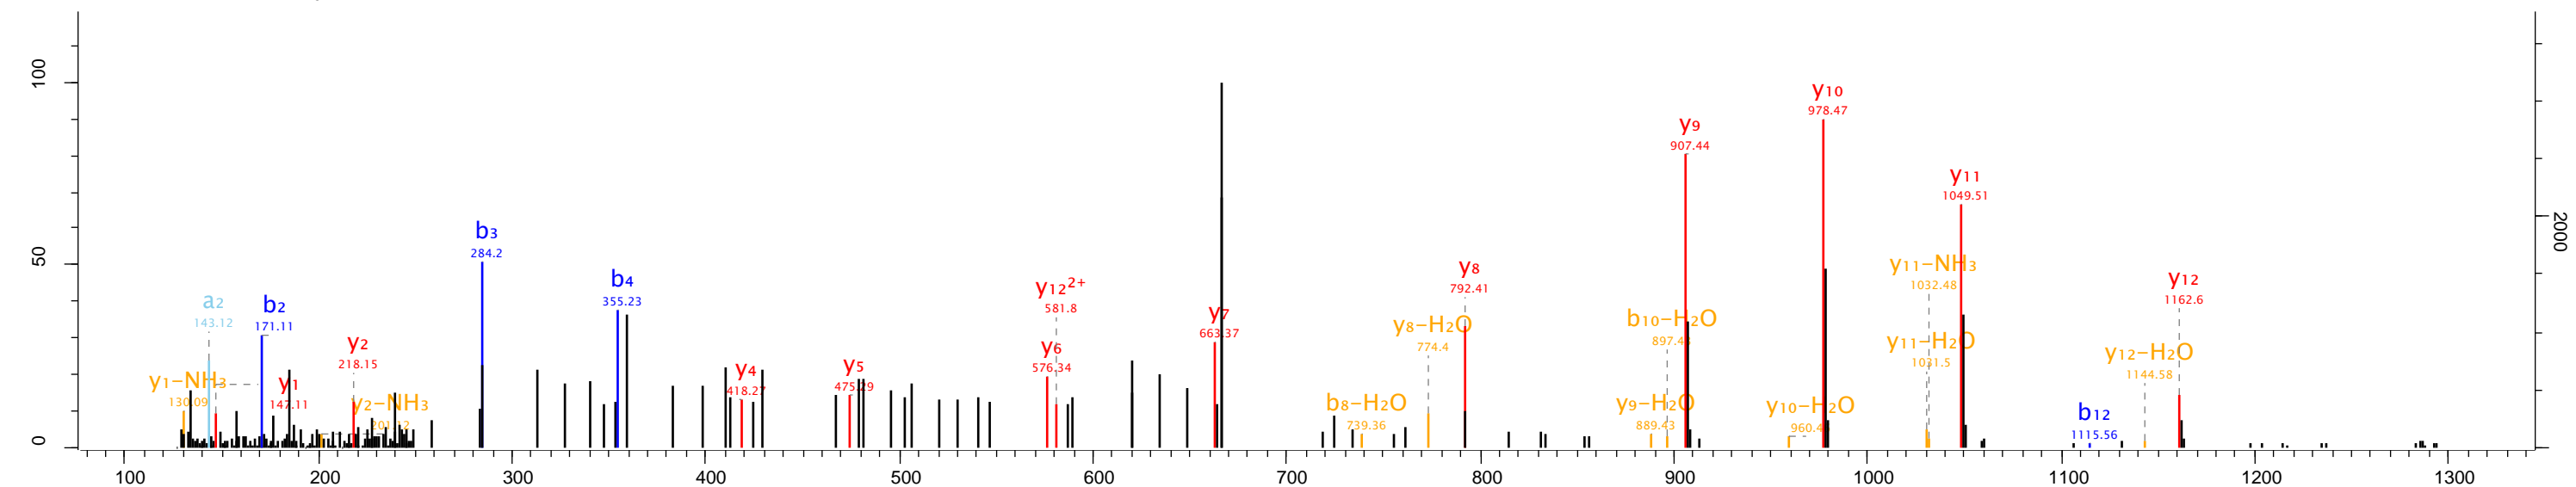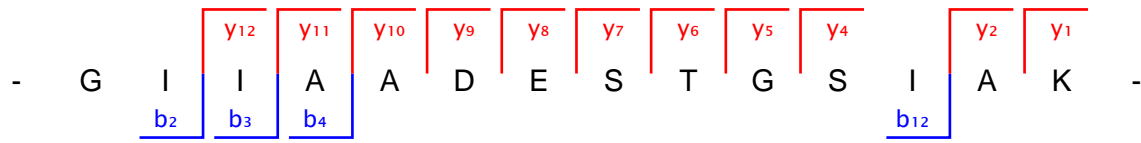

Spectral Annotation for Single-Peptide IDs in 16-cell Embryo using Q-OT-LIT

Raw file 2015-01-05\_CL02\_2Excl15sMaxInj70 Scan 17061 Method ITMS; HCD Score 61.99 m/z 845.41

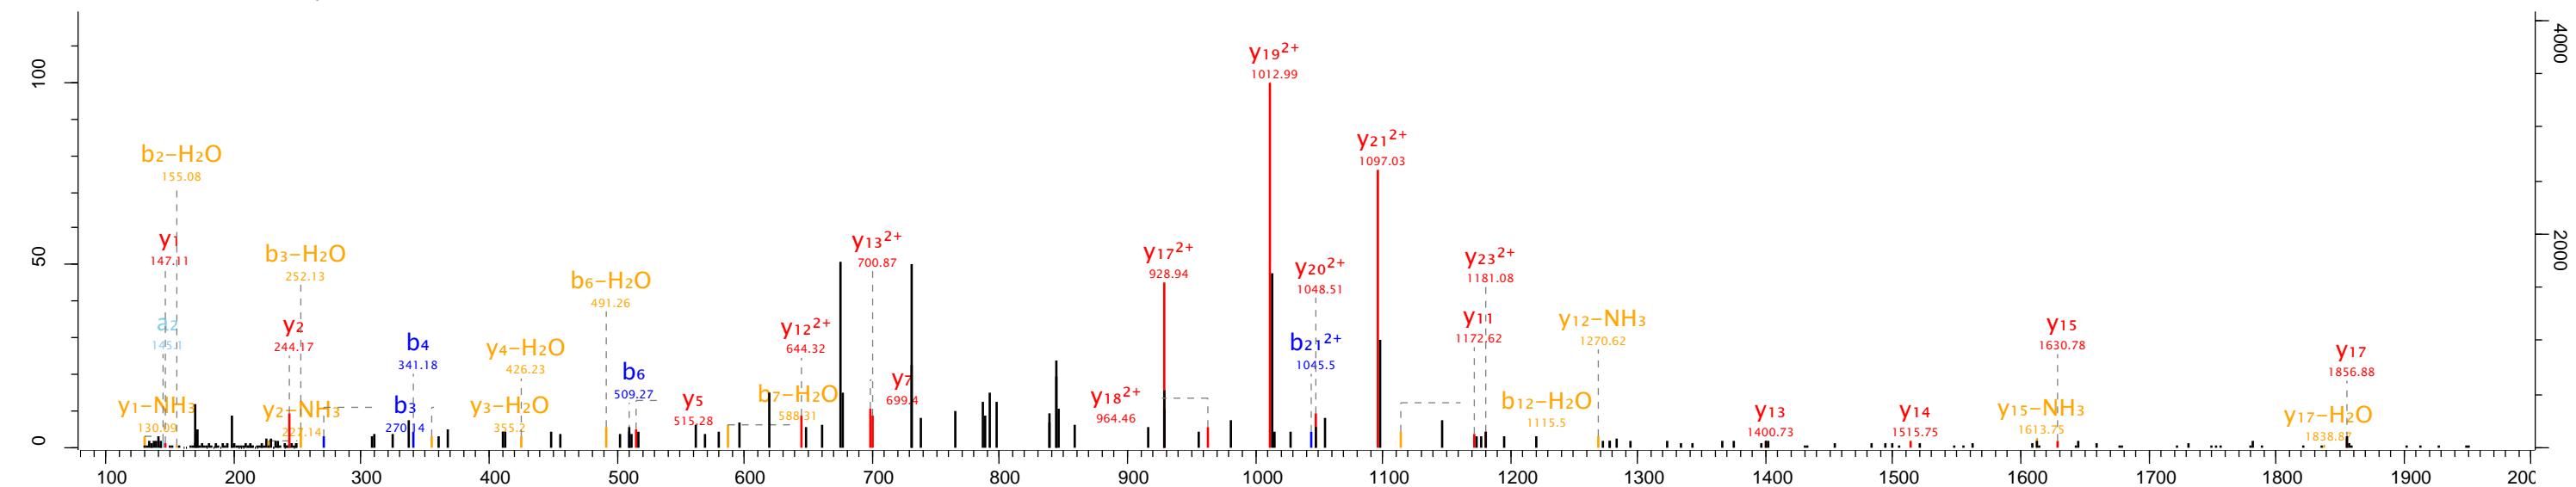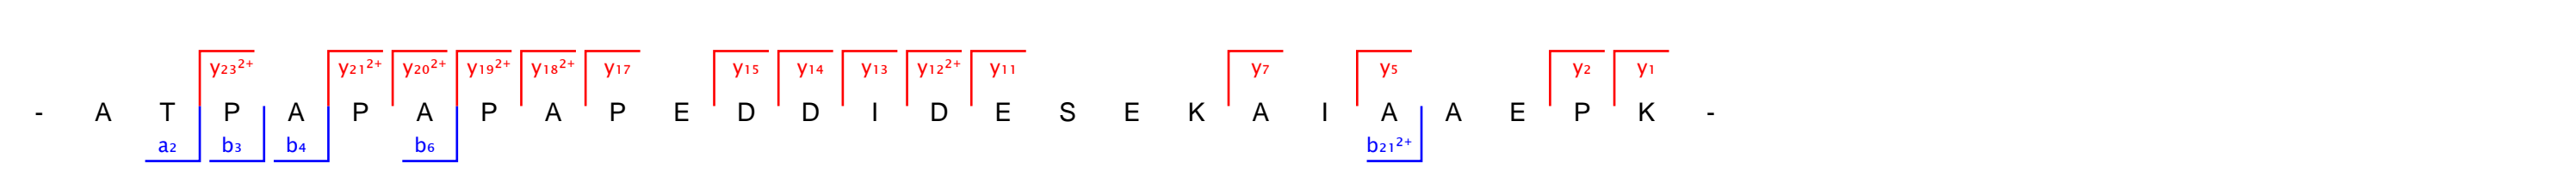

Spectral Annotation for Single-Peptide IDs in 16-cell Embryo using Q-OT-LIT

Raw file  
 2015-01-05\_CL02\_2Excl15sMaxInj70  
 Scan 17187 Method ITMS; HCD Score 58.27 m/z 724.42

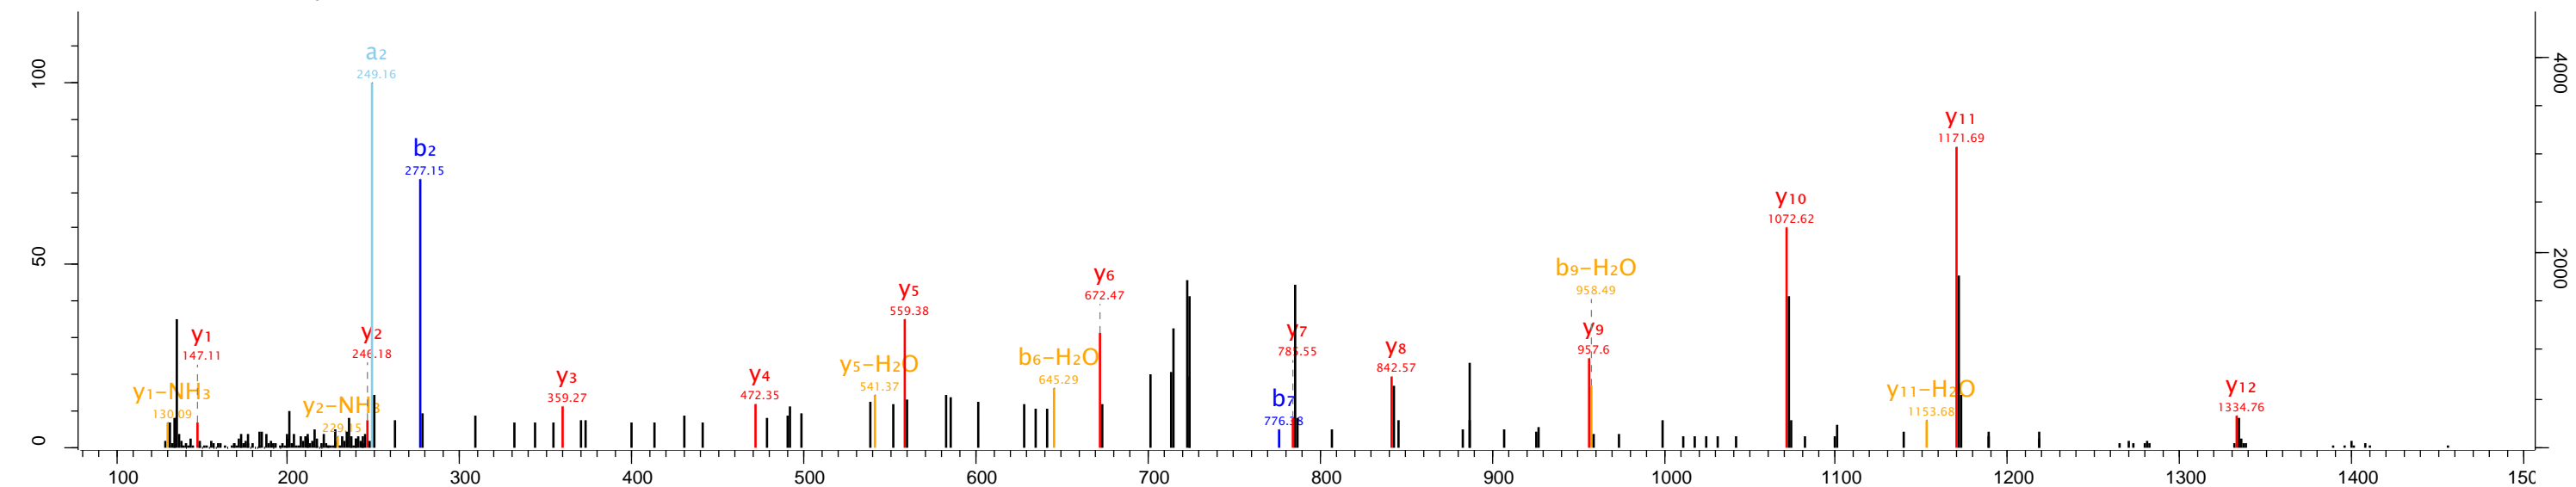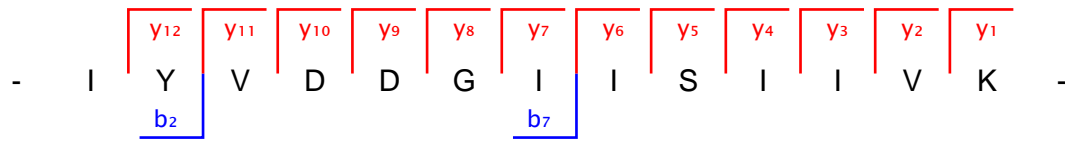

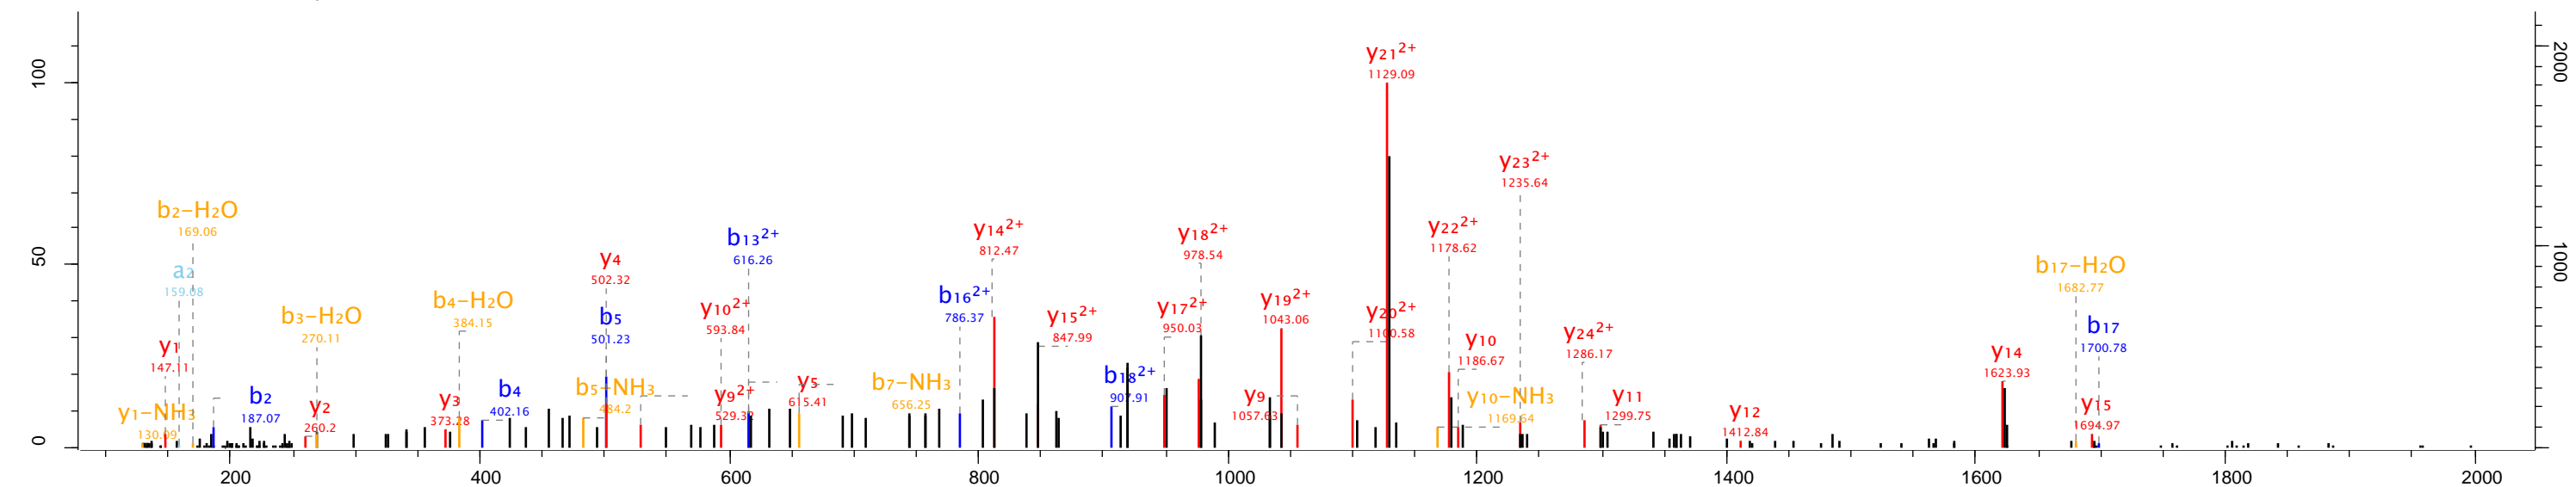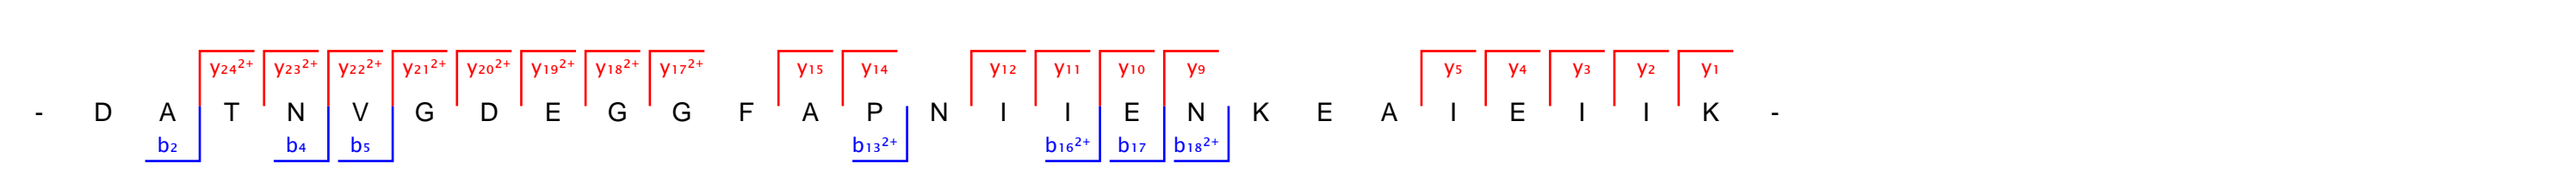

Raw file: 2015-01-05\_CL02\_2Excl15sMaxInj70  
 Scan: 17327 Method: ITMS; HCD Score: 121.33 m/z: 919.8

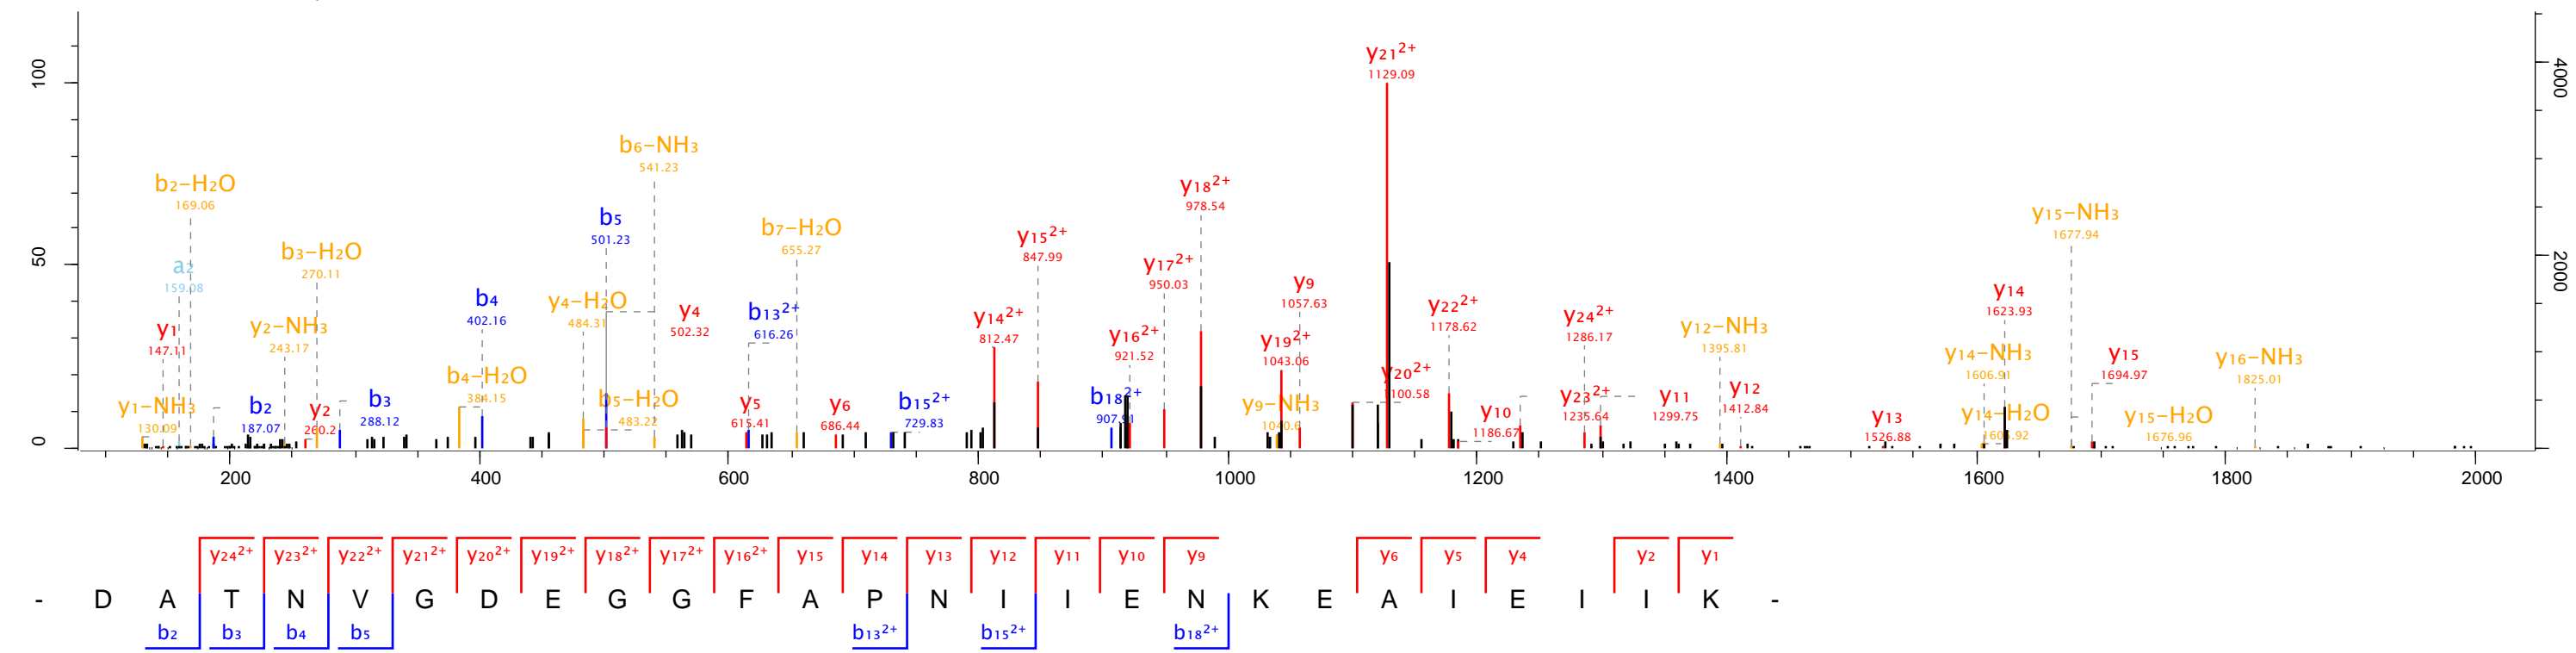

Spectral Annotation for Single-Peptide IDs in 16-cell Embryo using Q-OT-LIT



Raw file 2015-01-05\_CL02\_2Excl15sMaxInj70 Scan 17399 Method ITMS; HCD Score 62.08 m/z 954.11

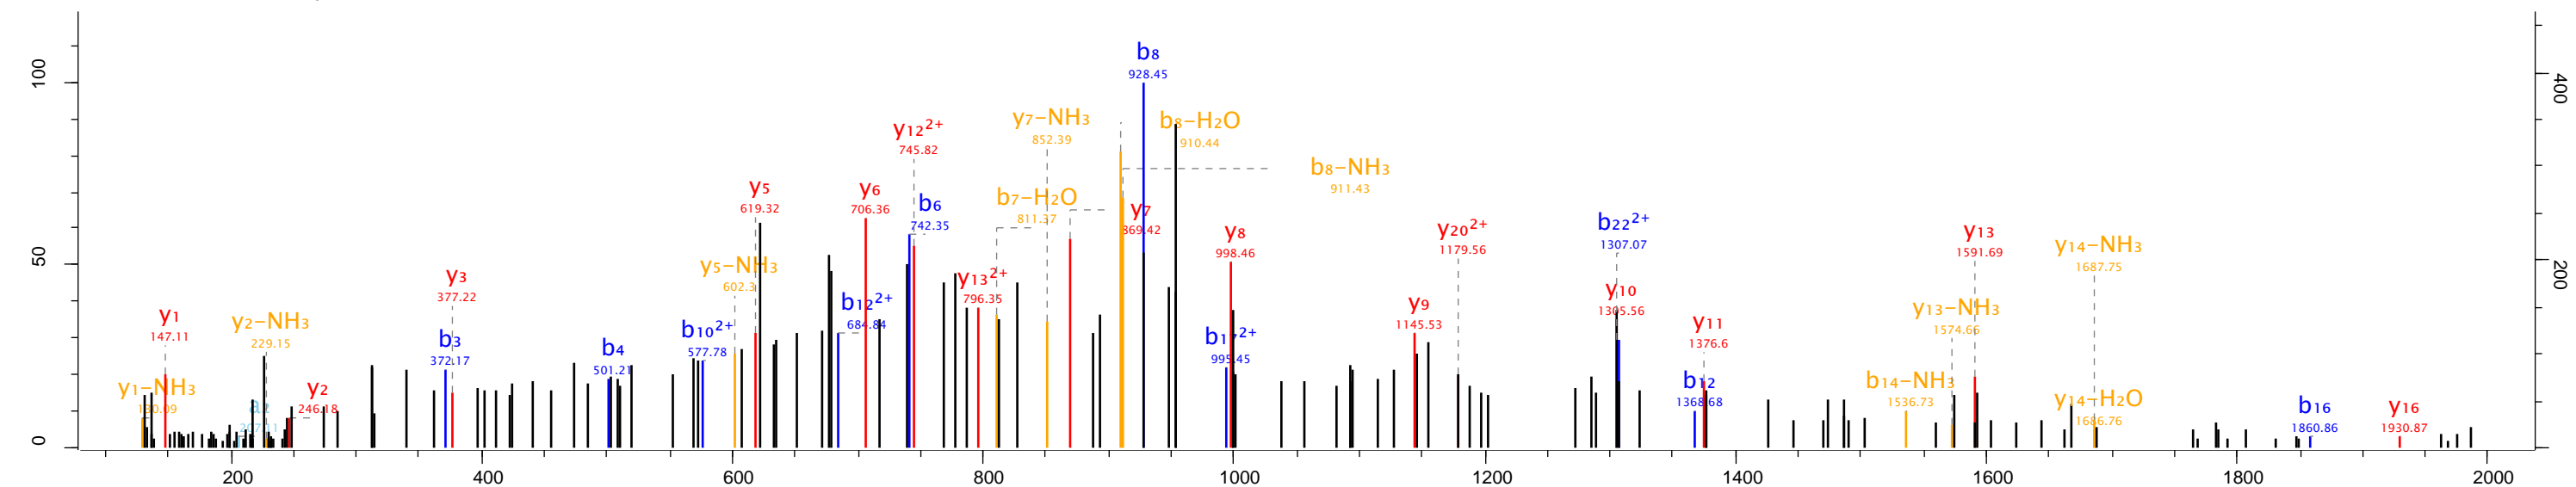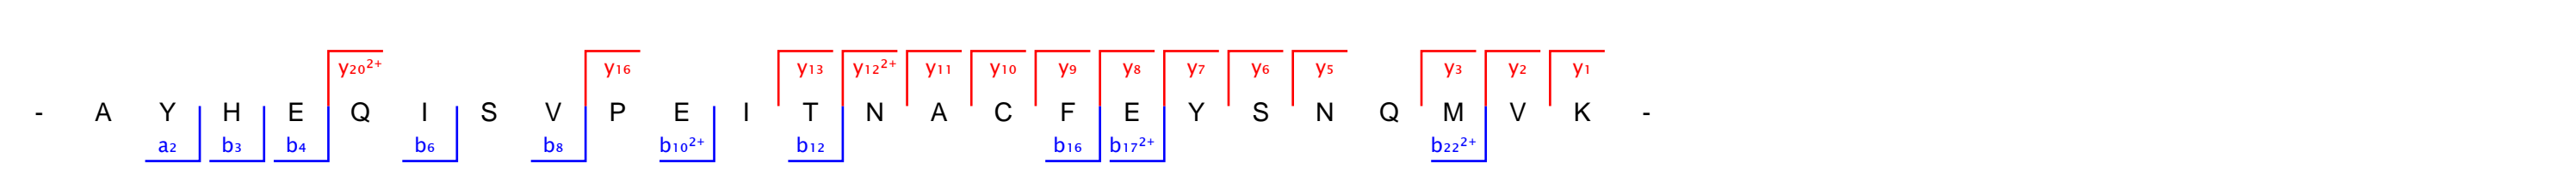

Spectral Annotation for Single-Peptide IDs in 16-cell Embryo using Q-OT-LIT

Raw file  
2015-01-05\_CL02\_2Excl15sMaxInj70

Scan 17405  
Method ITMS; HCD  
Score 57.43  
m/z 724.42

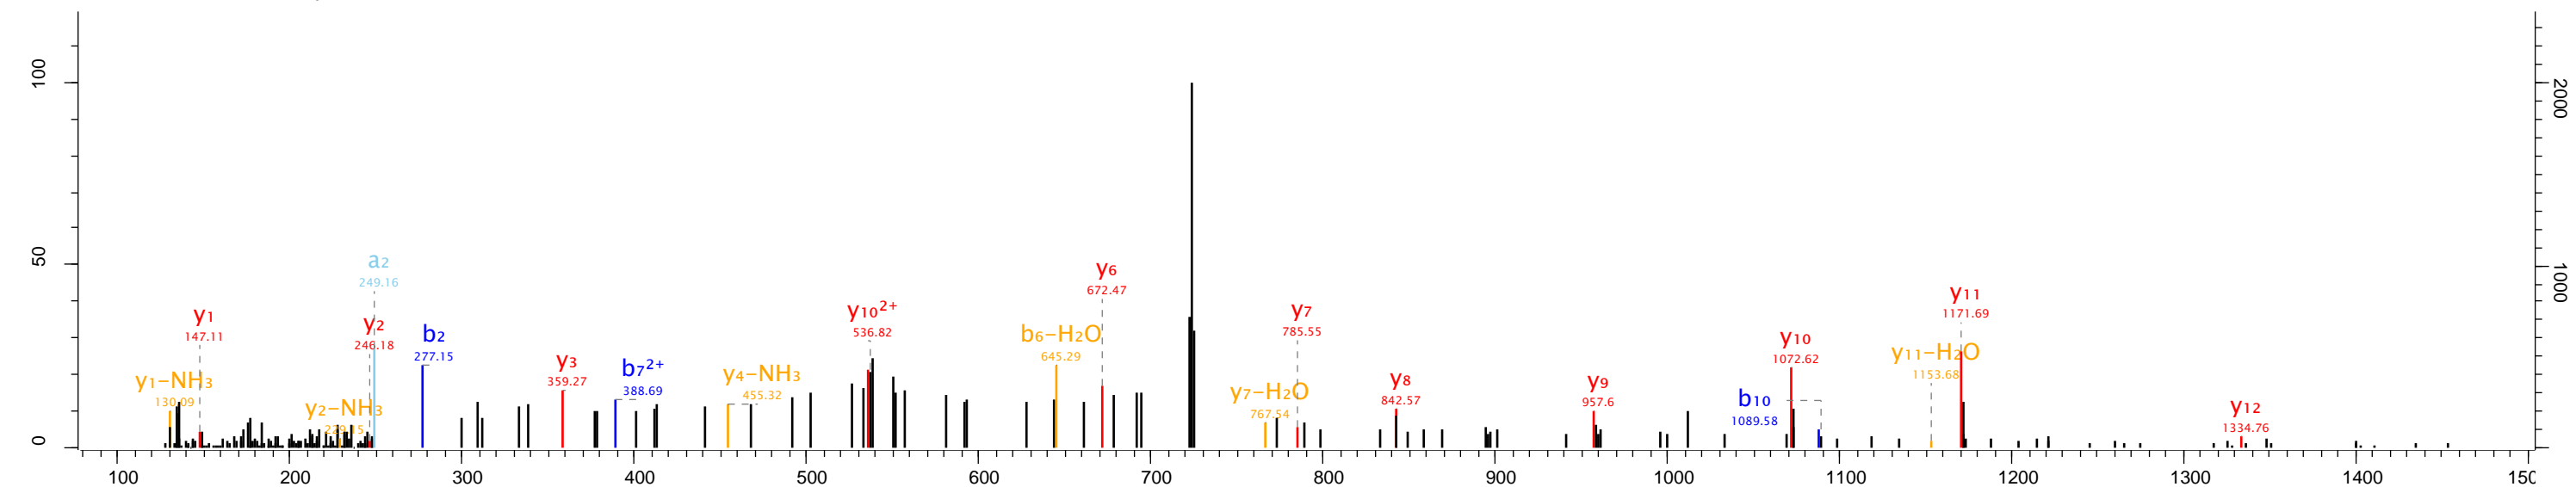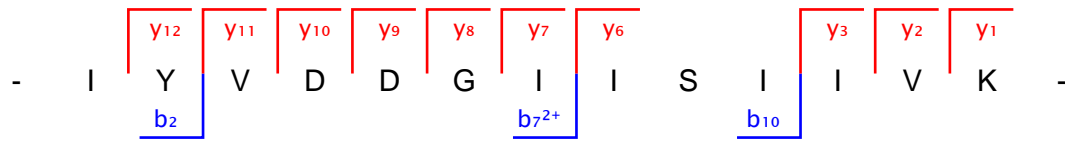



Raw file: 2015-01-05\_CL02\_2Excl15sMaxInj70  
 Scan: 17427 Method: ITMS; HCD Score: 113.89 m/z: 1031.47

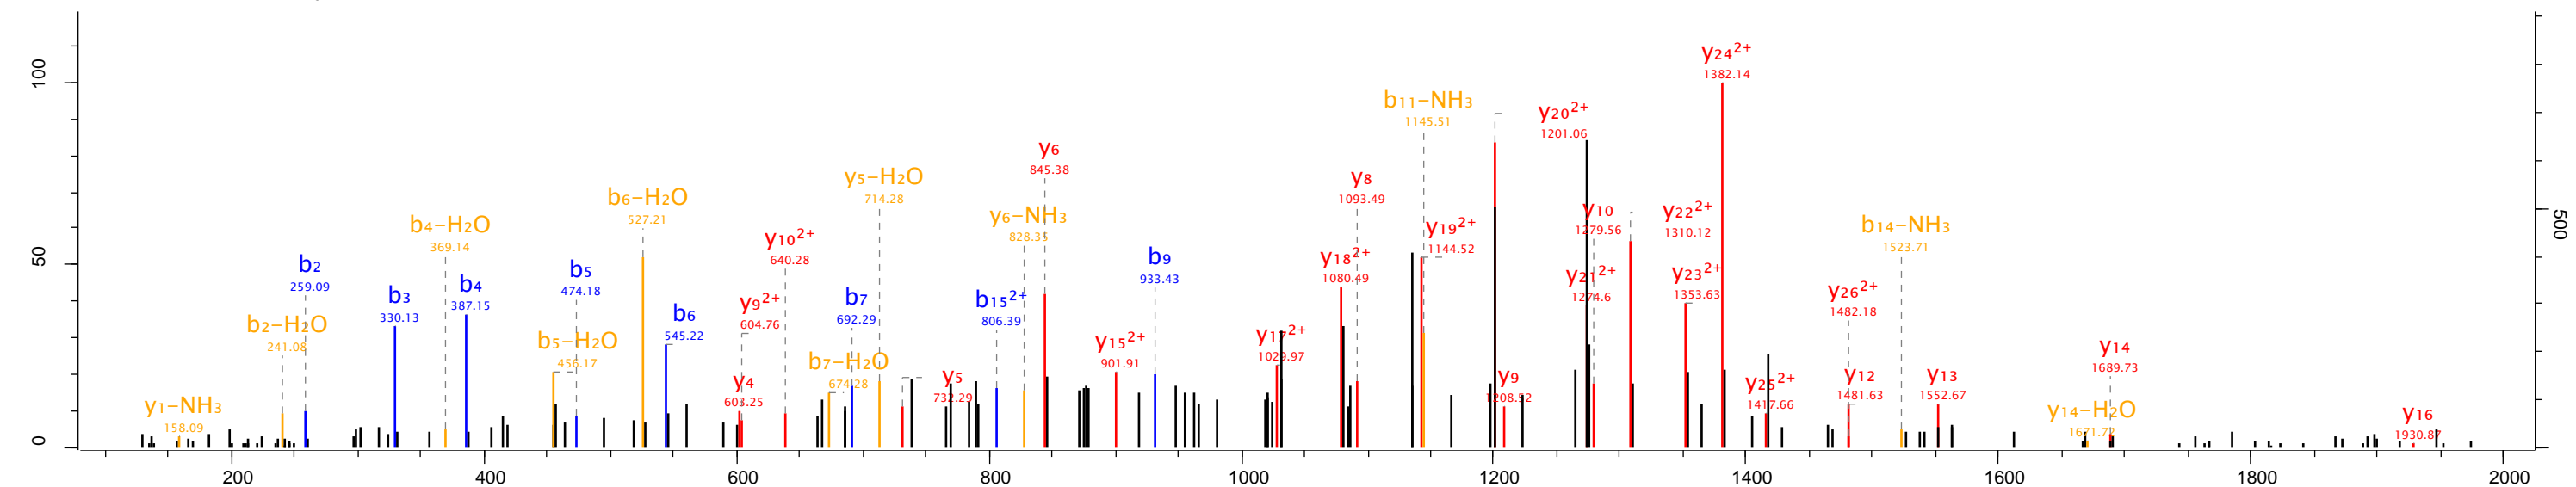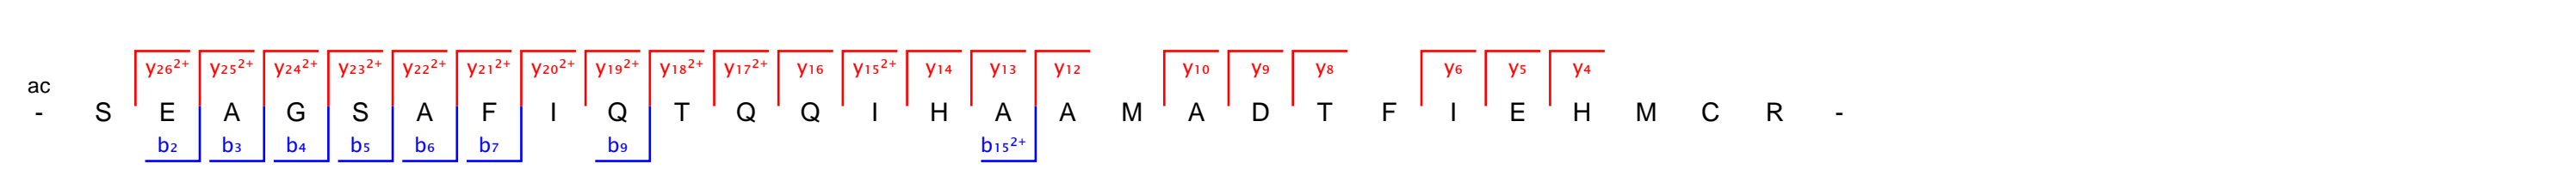

Raw file 2015-01-05\_CL02\_2Excl15sMaxInj70 Scan 17434 Method ITMS; HCD Score 47.81 m/z 954.11

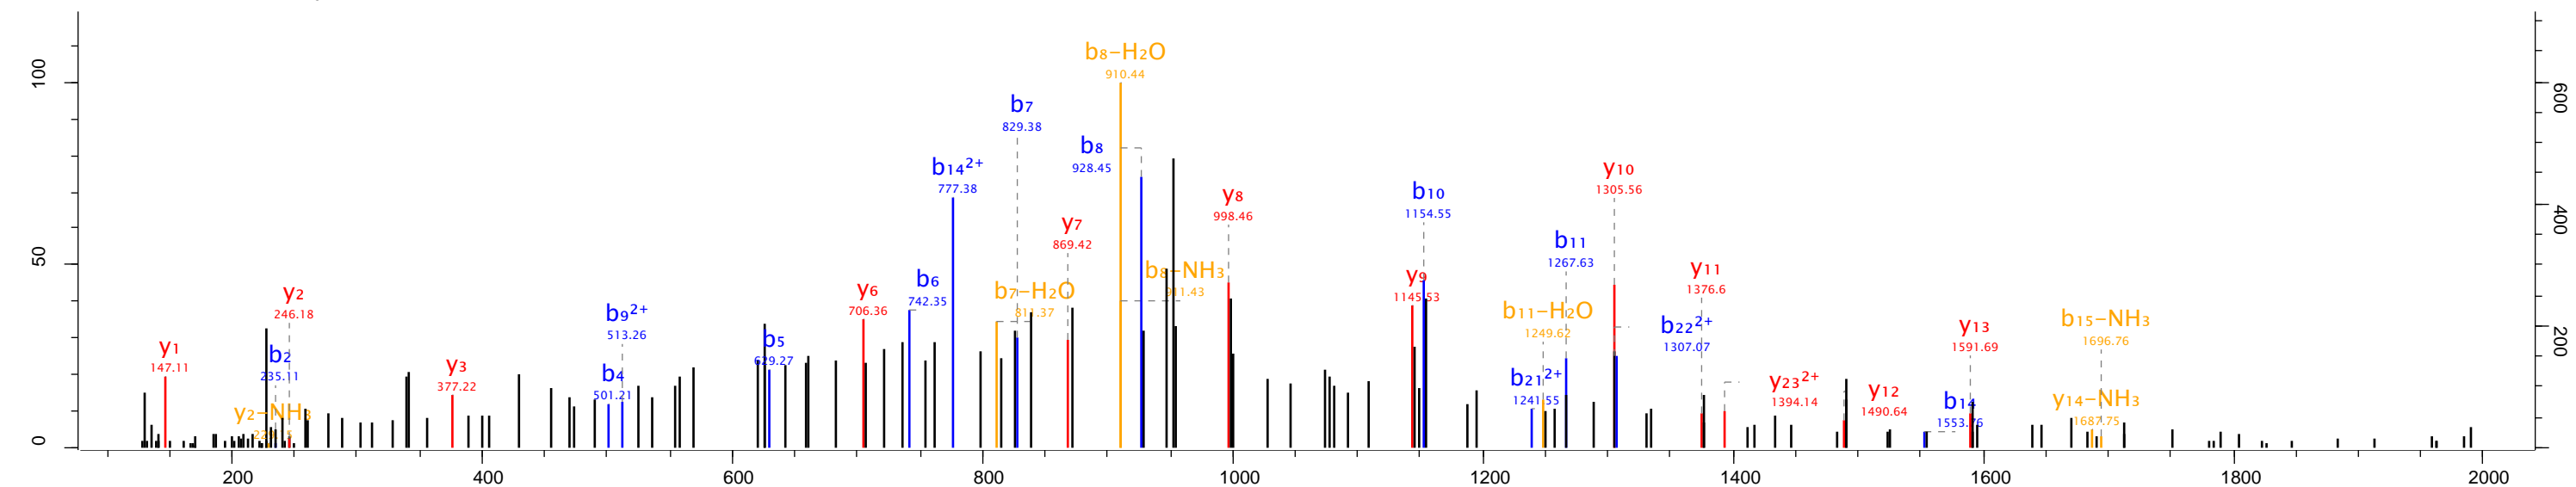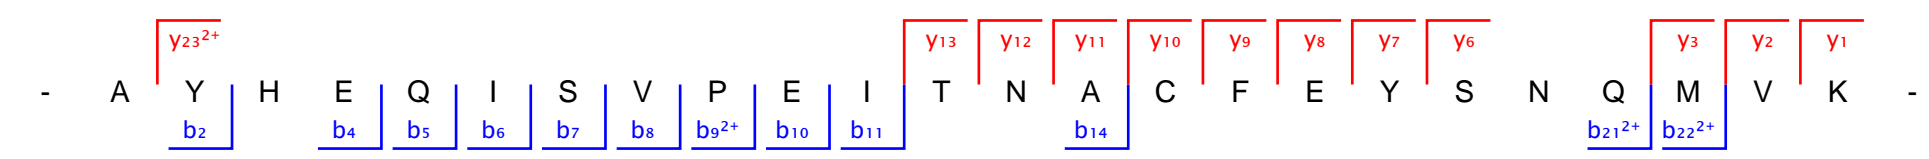

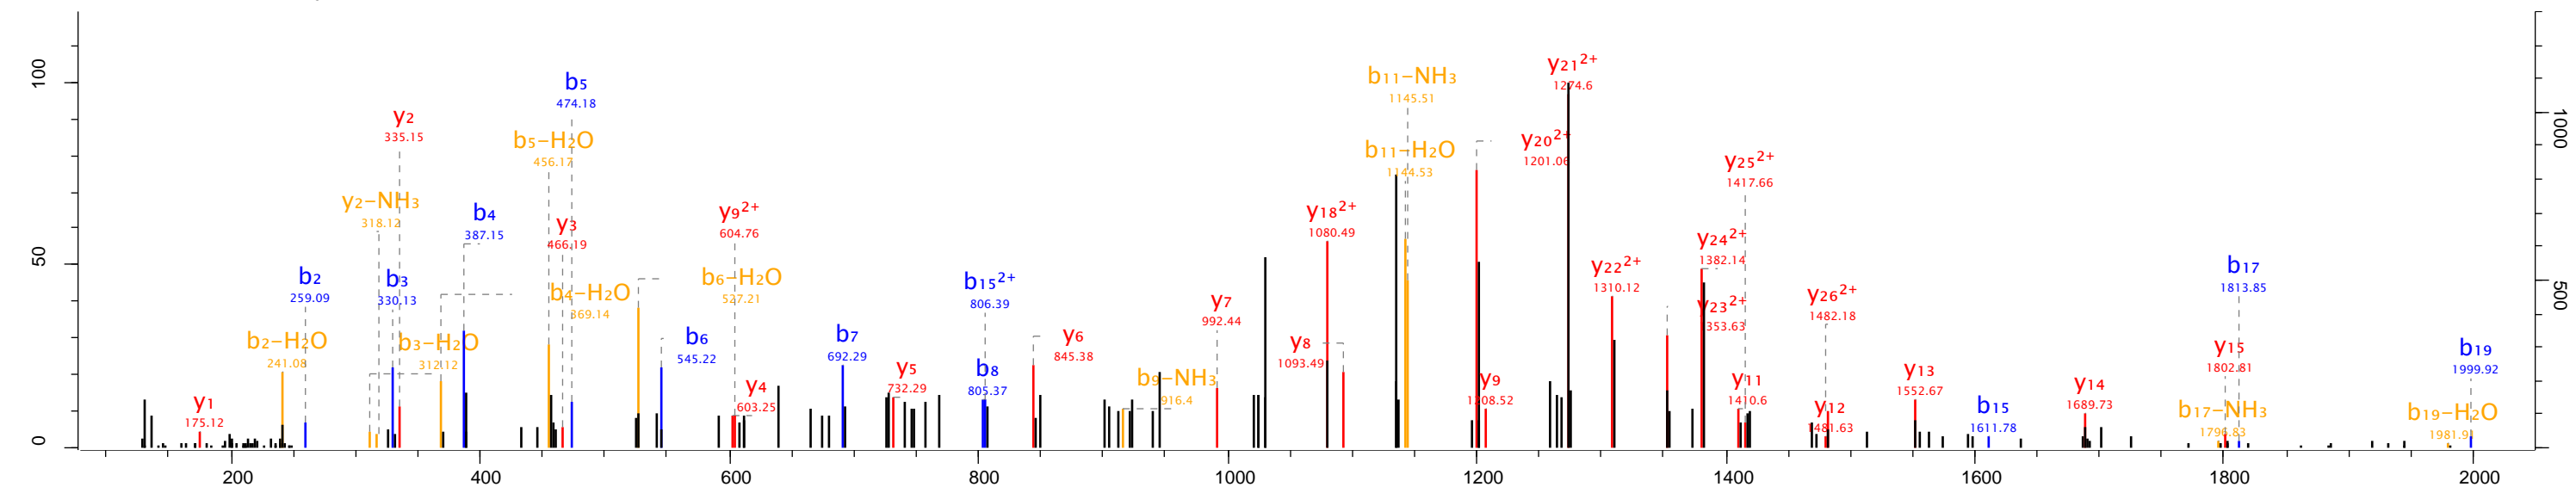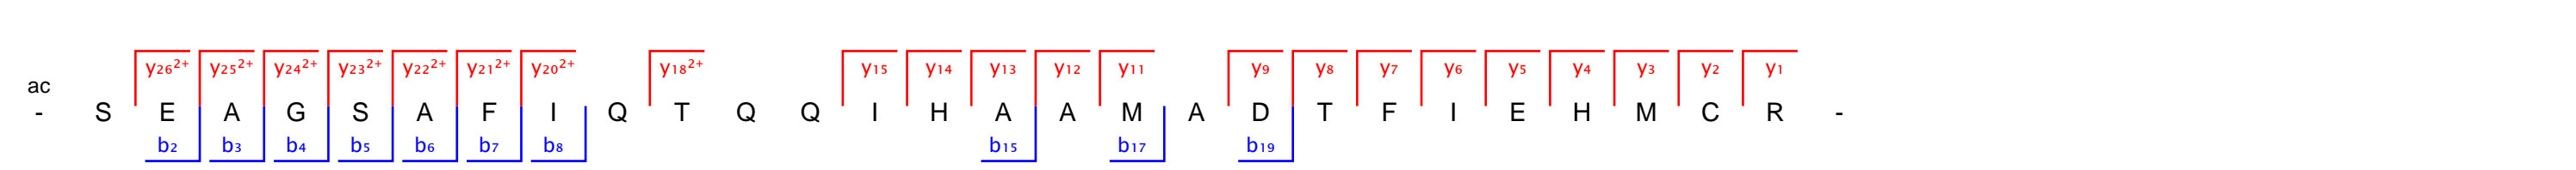

Raw file  
 2015-01-05\_CL02\_2Excl15sMaxInj70  
 Scan 17454 Method ITMS; HCD Score 48.29 m/z 953.77

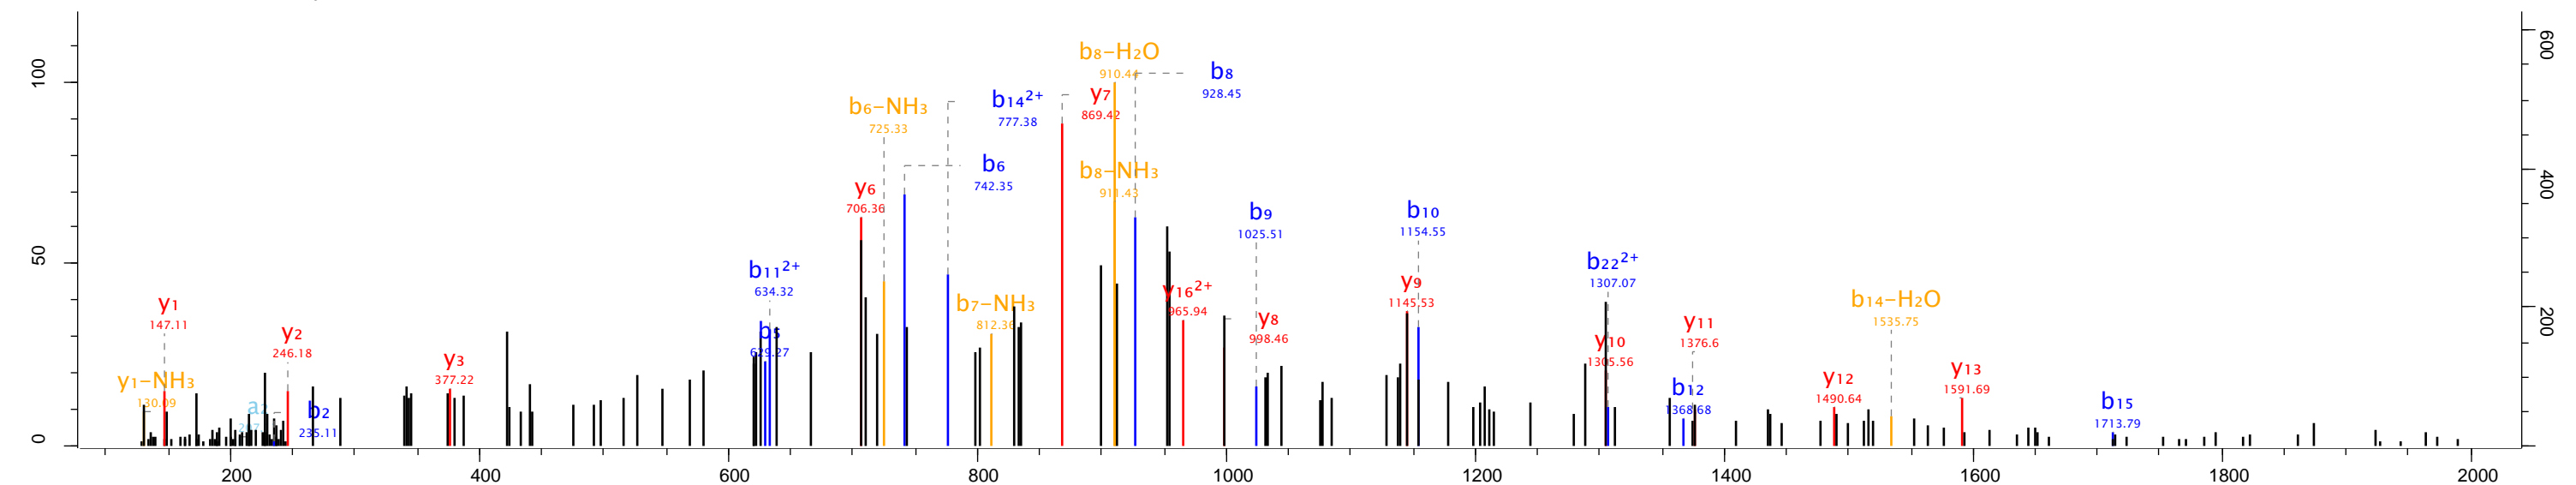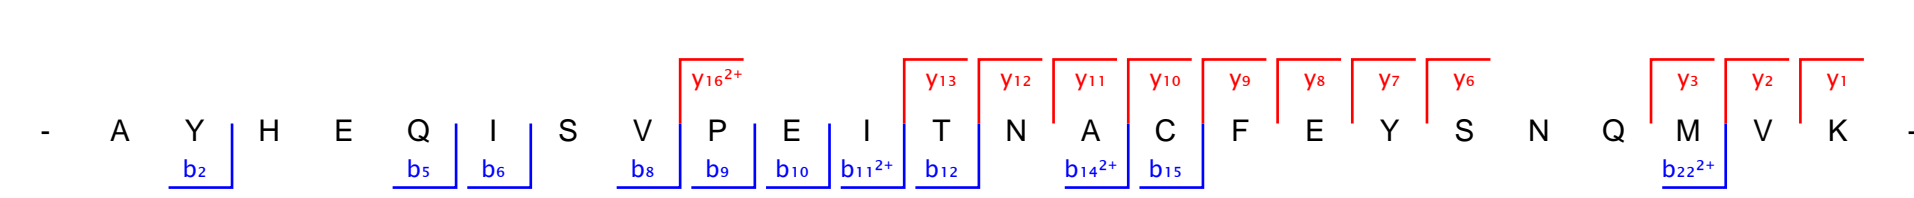

Spectral Annotation for Single-Peptide IDs in 16-cell Embryo using Q-OT-LIT

Raw file: 2015-01-05\_CL02\_2Excl15sMaxInj70  
 Scan: 17457 Method: ITMS; HCD Score: 100.44 m/z: 1031.47

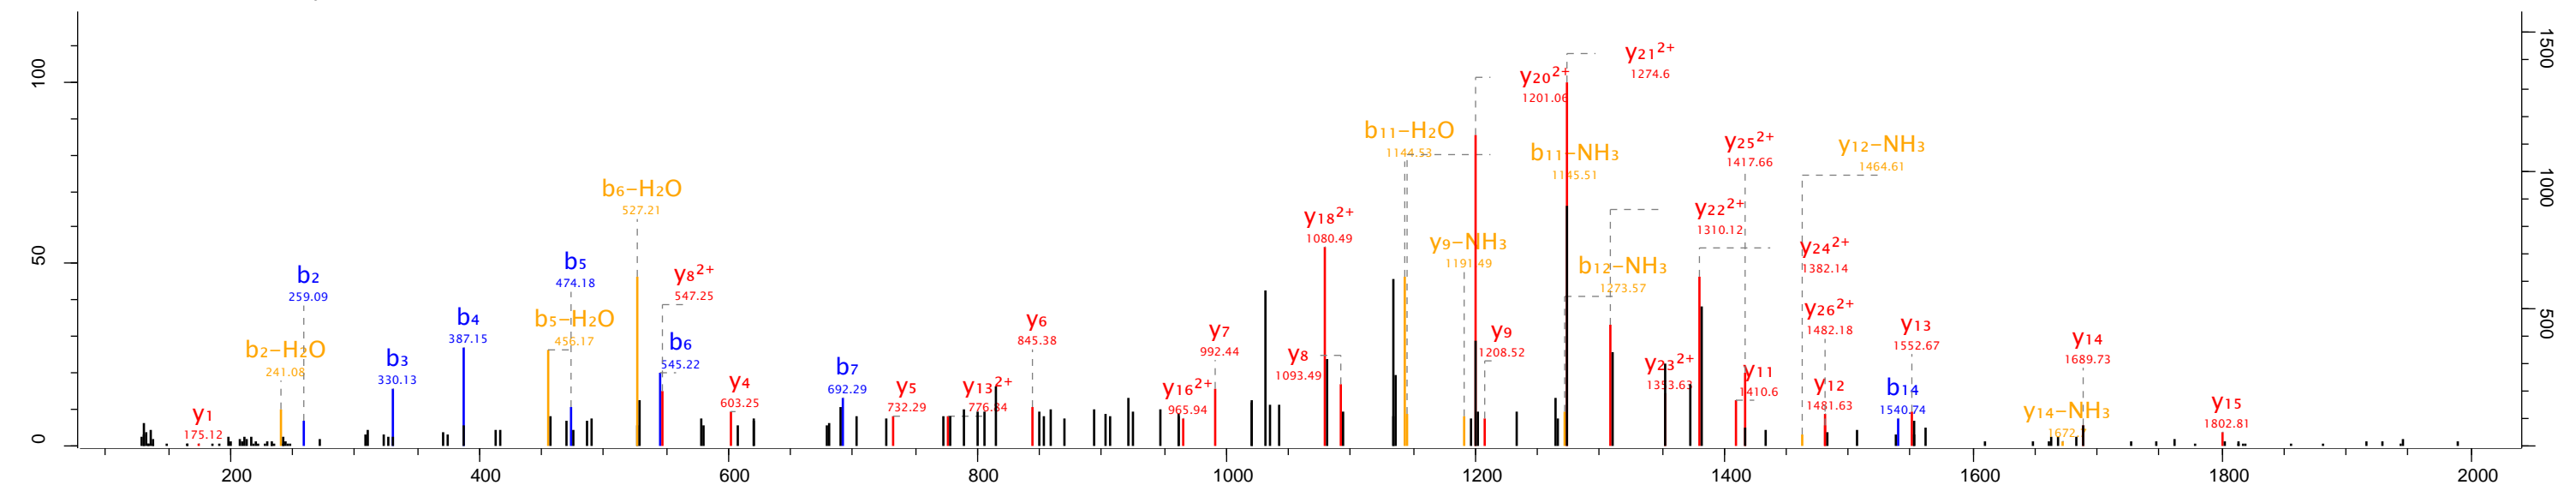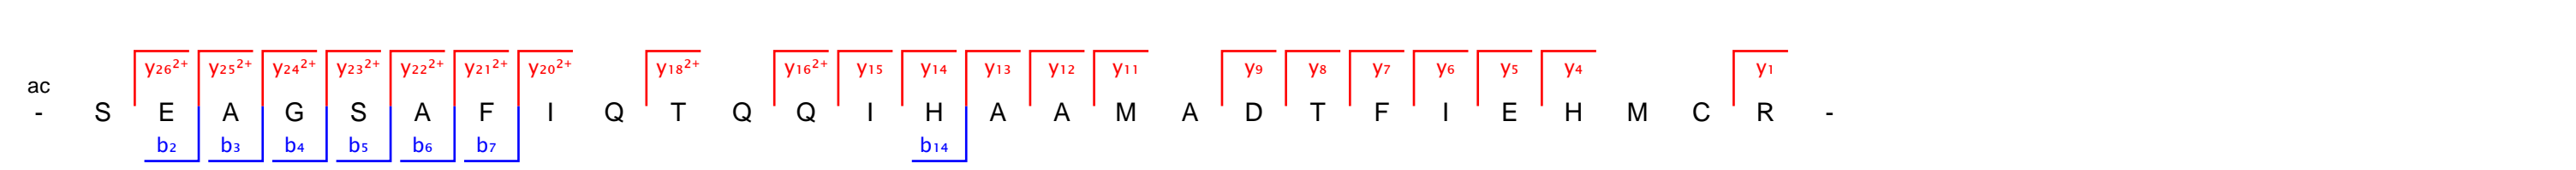

Raw file: 2015-01-05\_CL02\_2Excl15sMaxInj70  
 Scan: 17480 Method: ITMS; HCD Score: 107.88 m/z: 1032.14

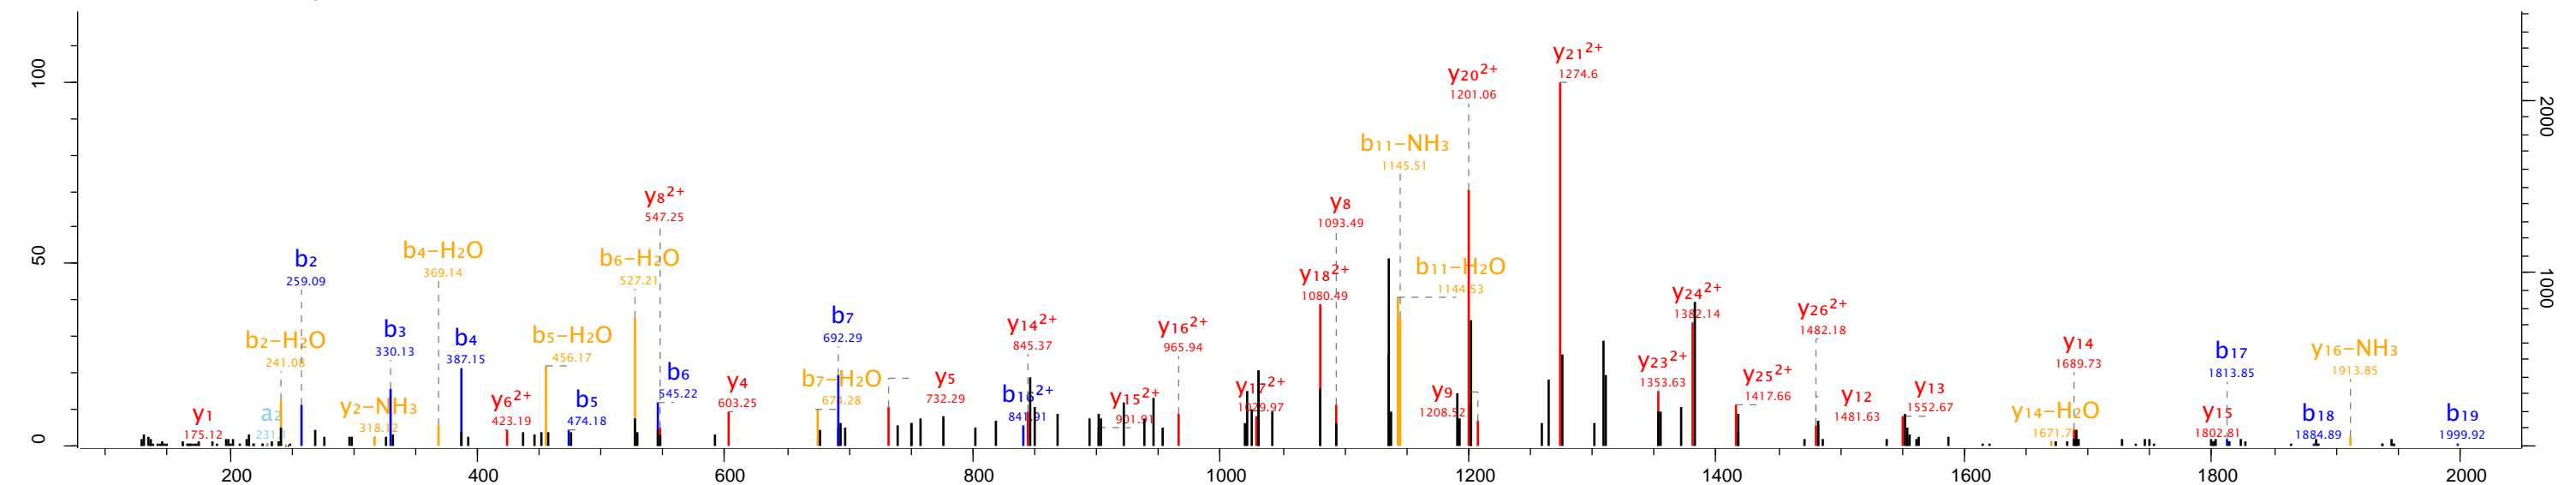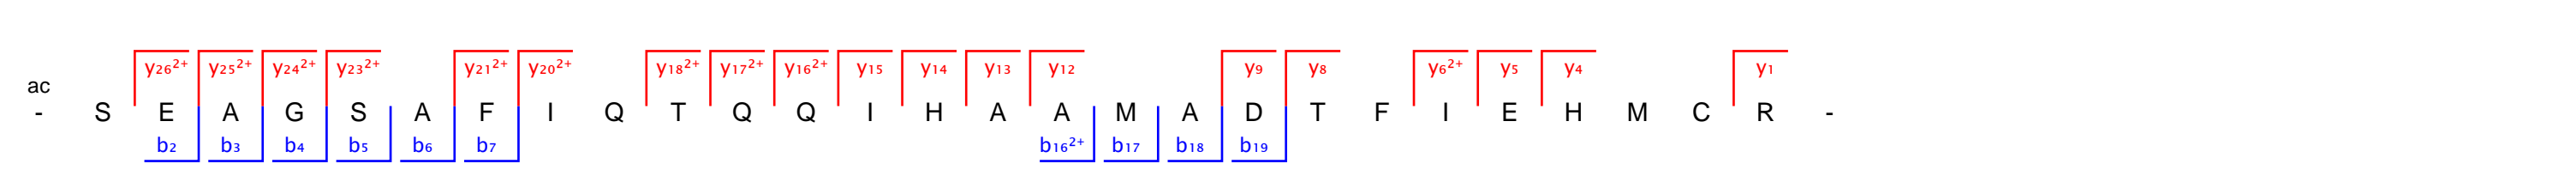

Raw file 2015-01-05\_CL02\_2Excl15sMaxInj70 Scan 17495 Method ITMS; HCD Score 96.04 m/z 1031.47

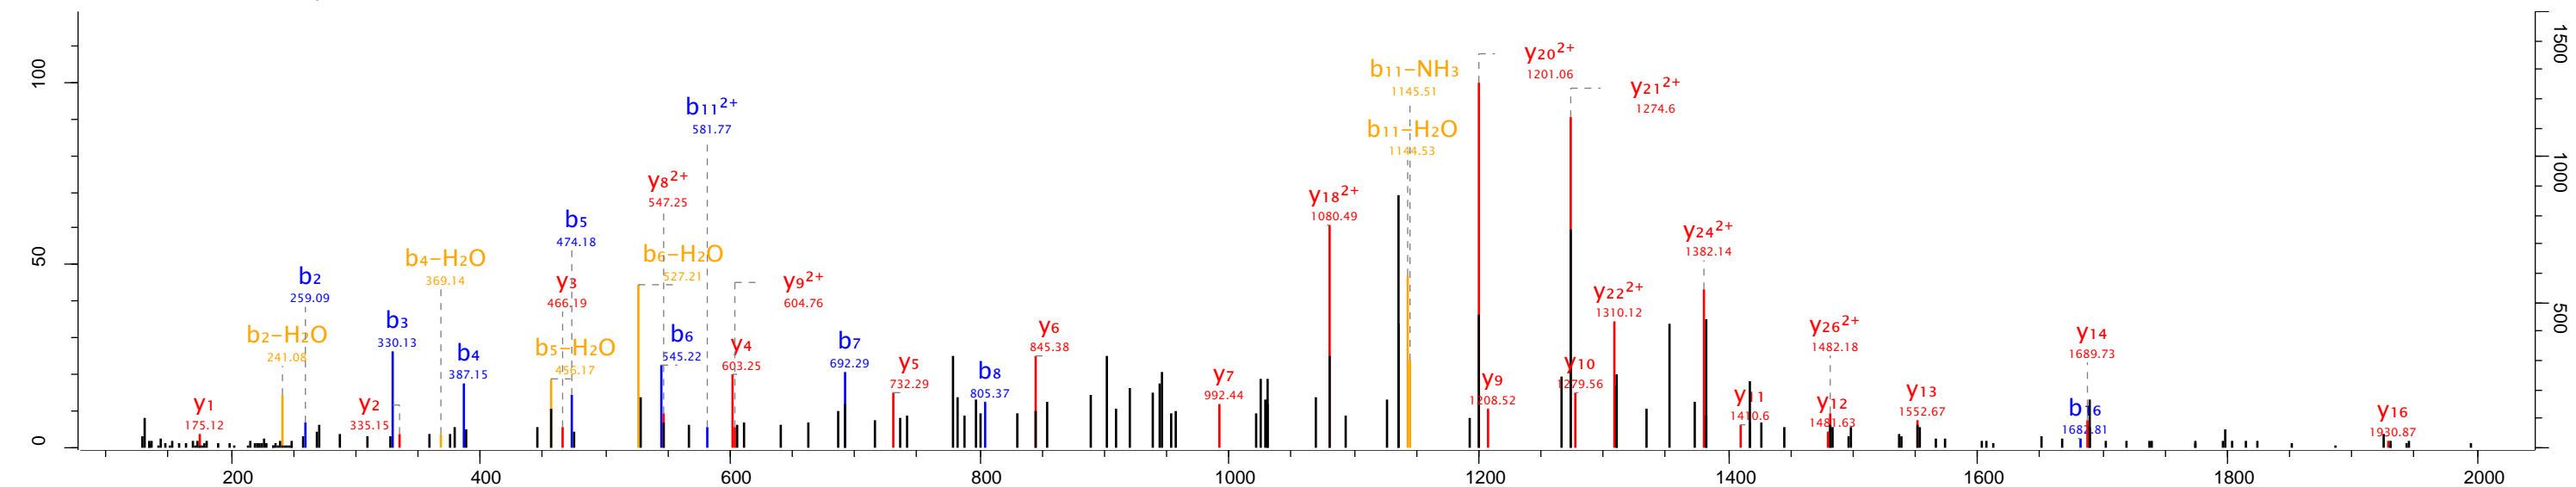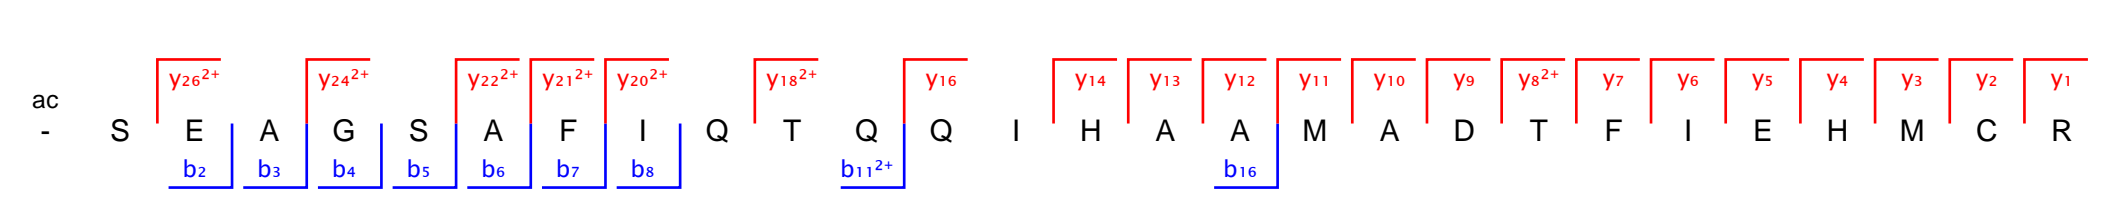

Spectral Annotation for Single-Peptide IDs in 16-cell Embryo using Q-OT-LIT

Raw file 2015-01-05\_CL02\_2Excl15sMaxInj70 Scan 17514 Method ITMS; HCD Score 30.14 m/z 1126.27

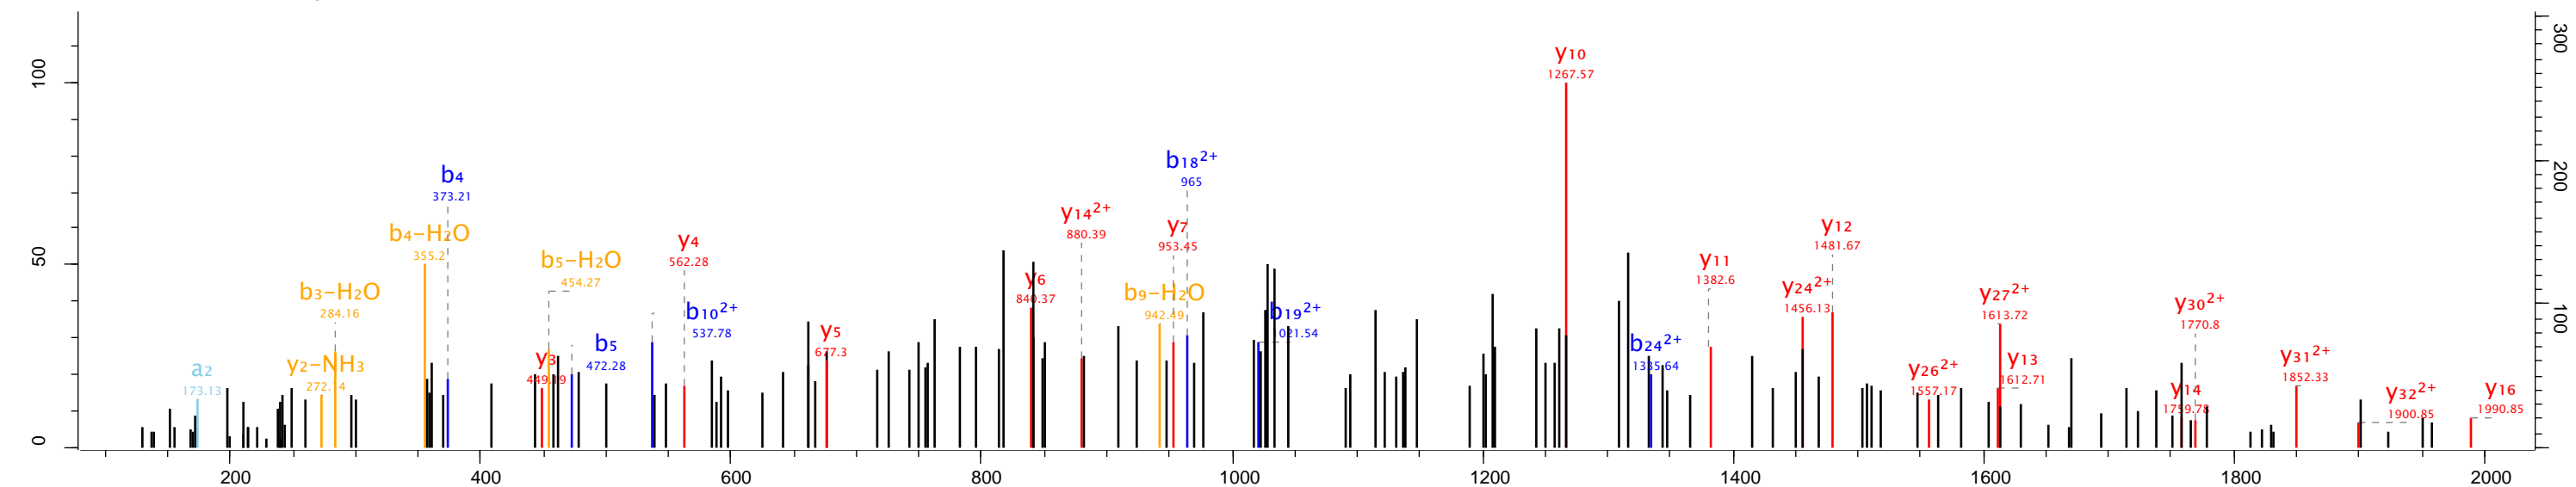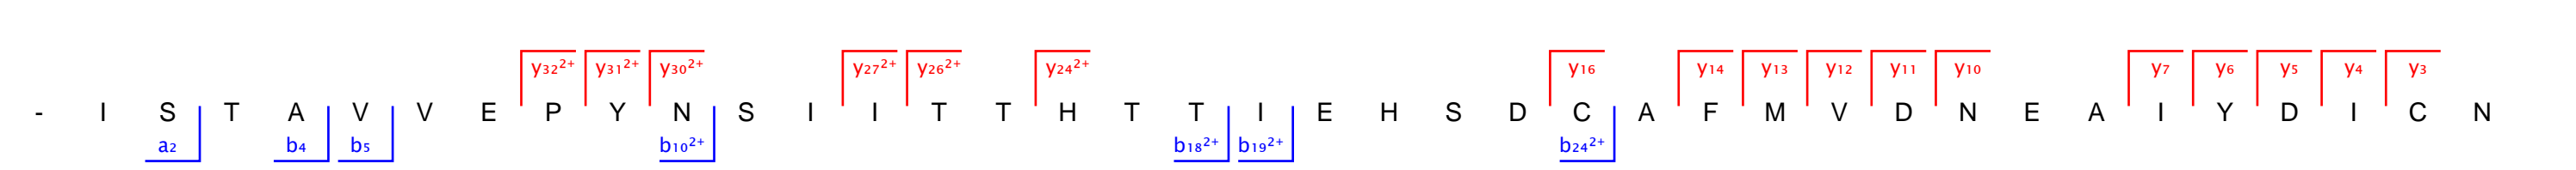

R - Spectral Annotation for Single-Peptide IDs in 16-cell Embryo using Q-OT-LIT



Raw file 2015-01-05\_CL02\_2Excl15sMaxInj70 Scan 17532 Method ITMS; HCD Score 23.78 m/z 1126.27

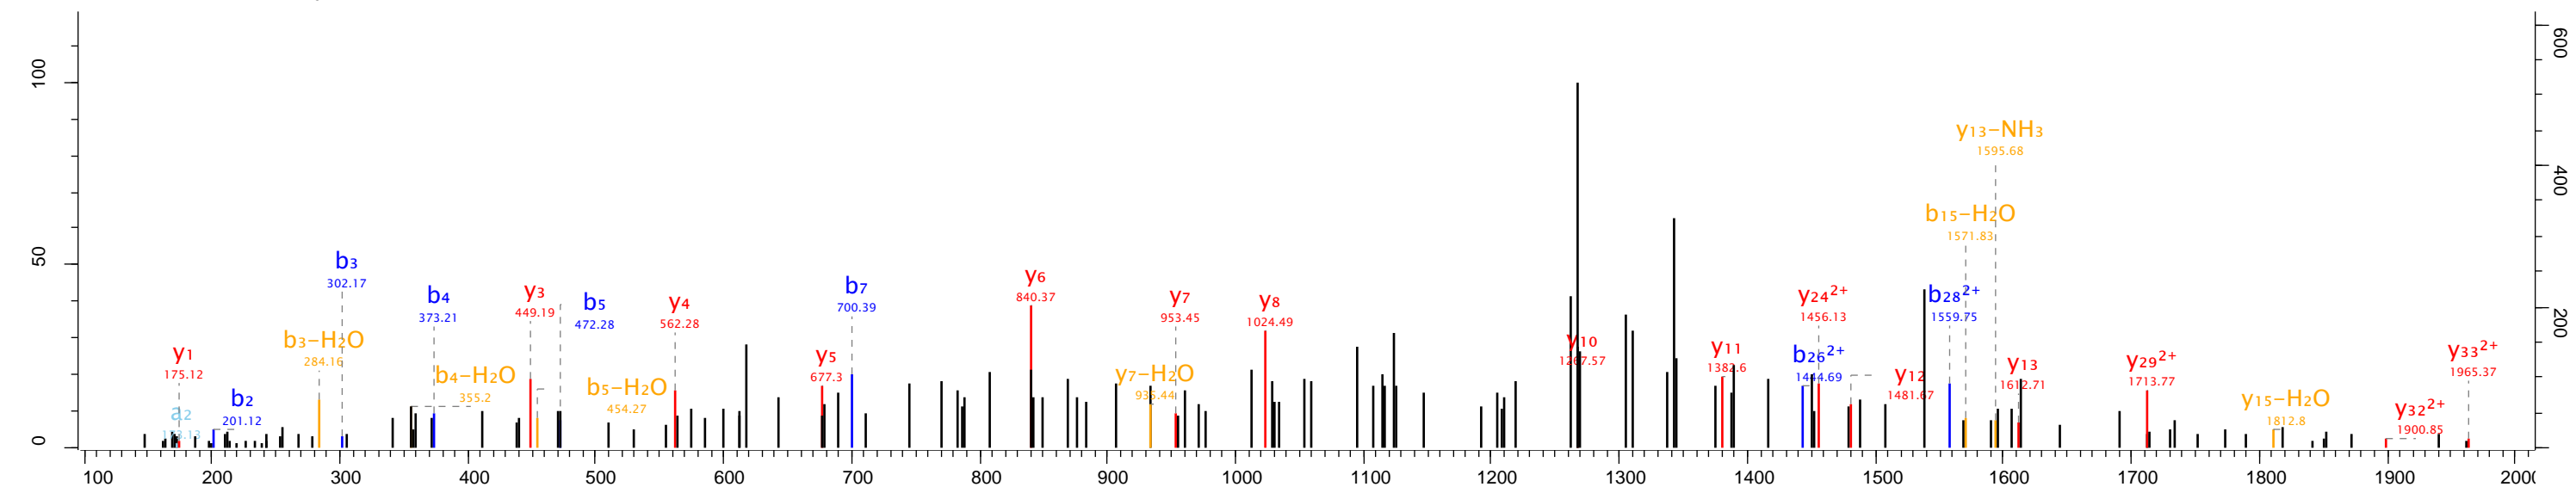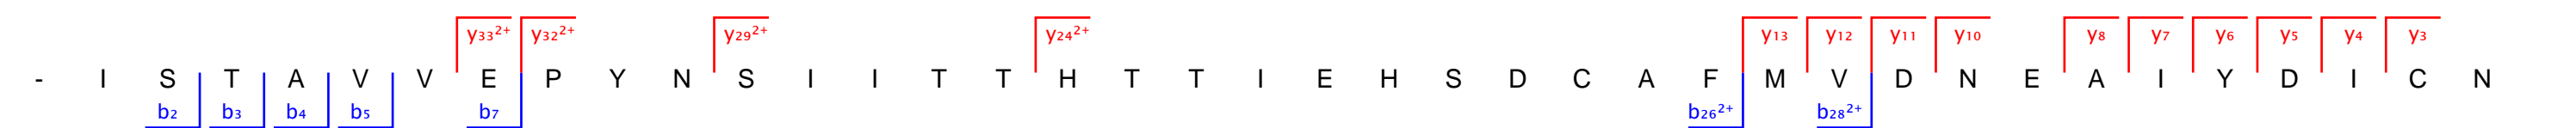

R - Spectral Annotation for Single-Peptide IDs in 16-cell Embryo using Q-OT-LIT

C. Lombard-Banek, S. Reddy, S. A. Moody, P. Nemes, Mol. Cell. Prot. 2016

Raw file Scan Method Score m/z  
 2015-01-05\_CL02\_2Excl15sMaxInj70 17703 ITMS; HCD 65.9 715.86

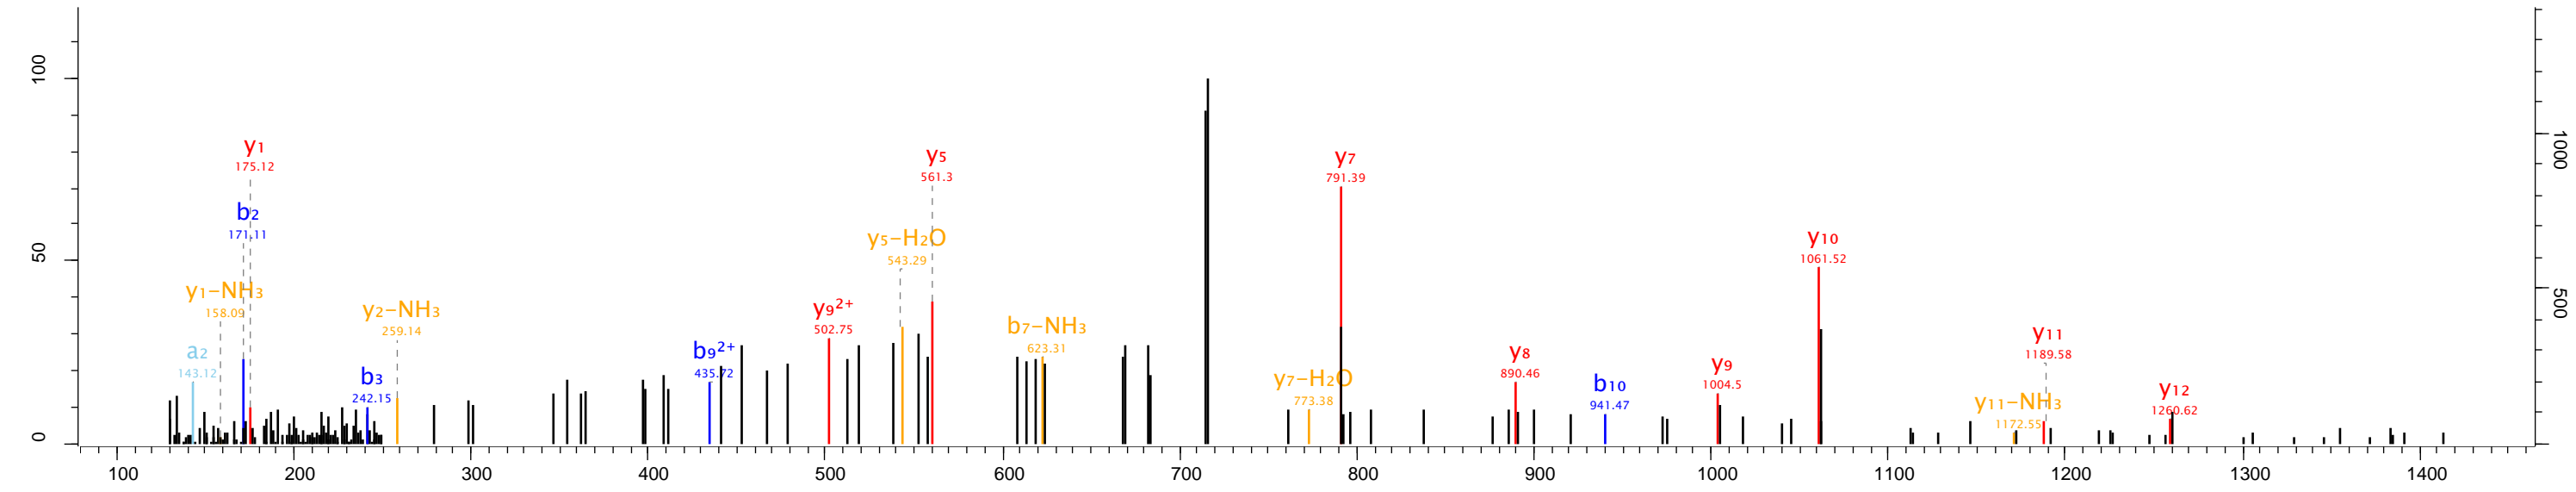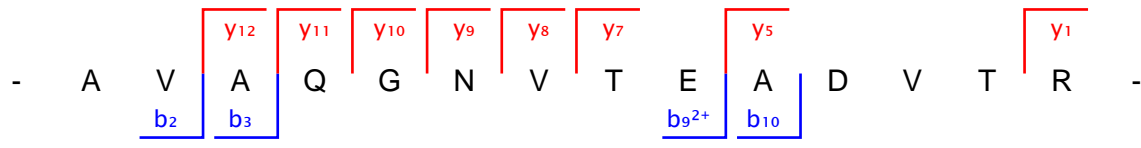

Spectral Annotation for Single-Peptide IDs in 16-cell Embryo using Q-OT-LIT

Raw file 2015-01-05\_CL02\_2Excl15sMaxInj70 Scan 17722 Method ITMS; HCD Score 63.19 m/z 793.38

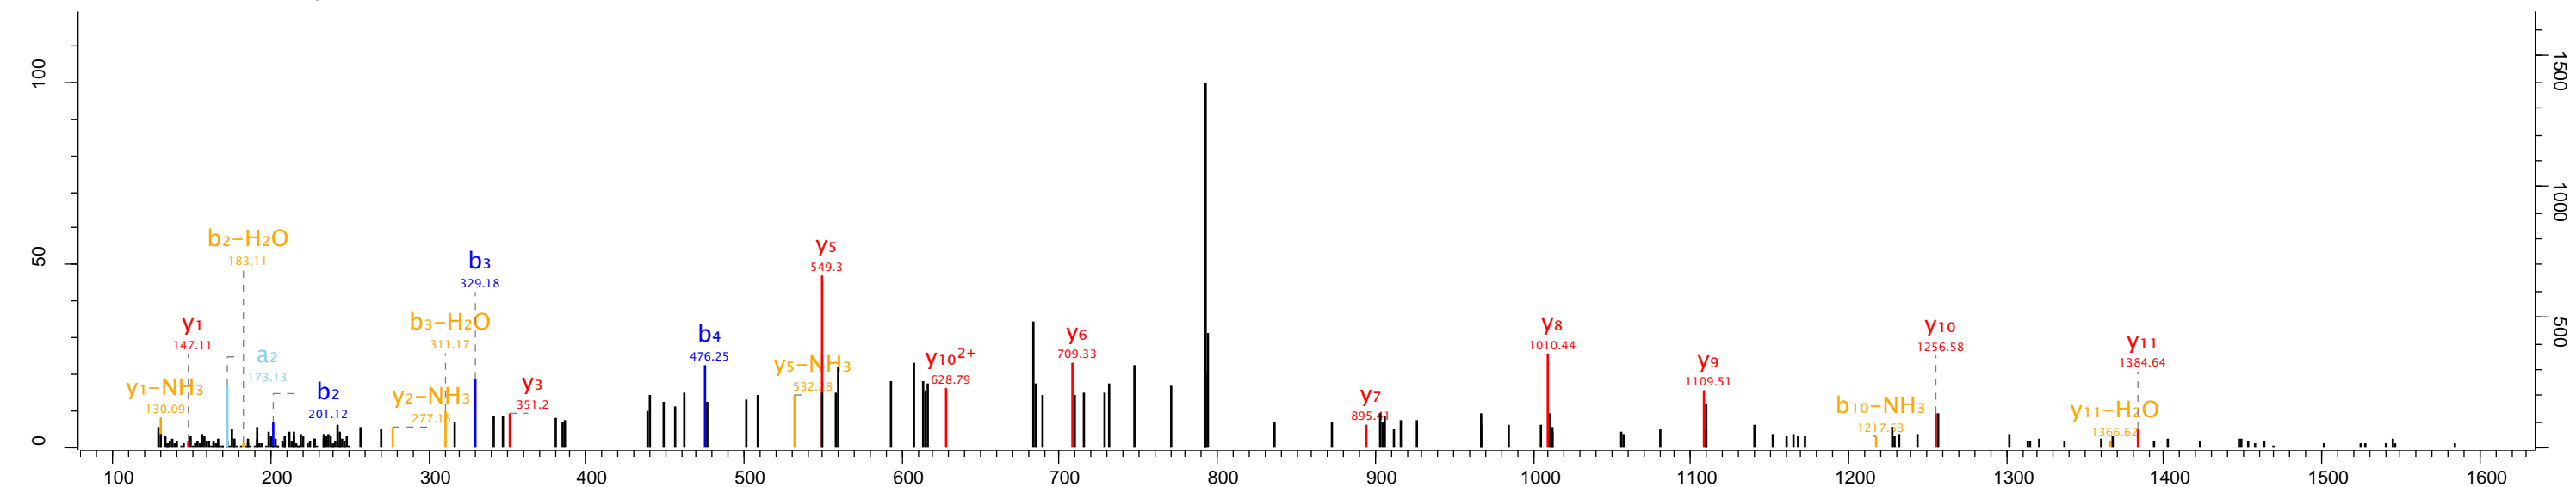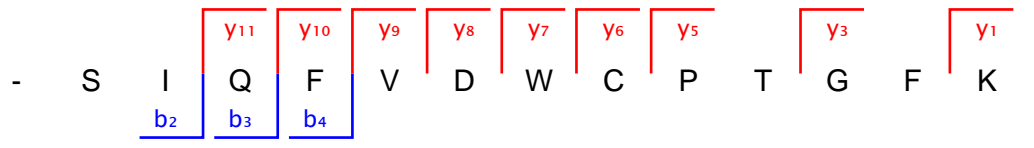

Spectral Annotation for Single-Peptide IDs in 16-cell Embryo using Q-OT-LIT

Raw file Scan Method Score m/z  
 2015-01-05\_CL02\_2Excl15sMaxInj70 17729 ITMS; HCD 58.32 715.86

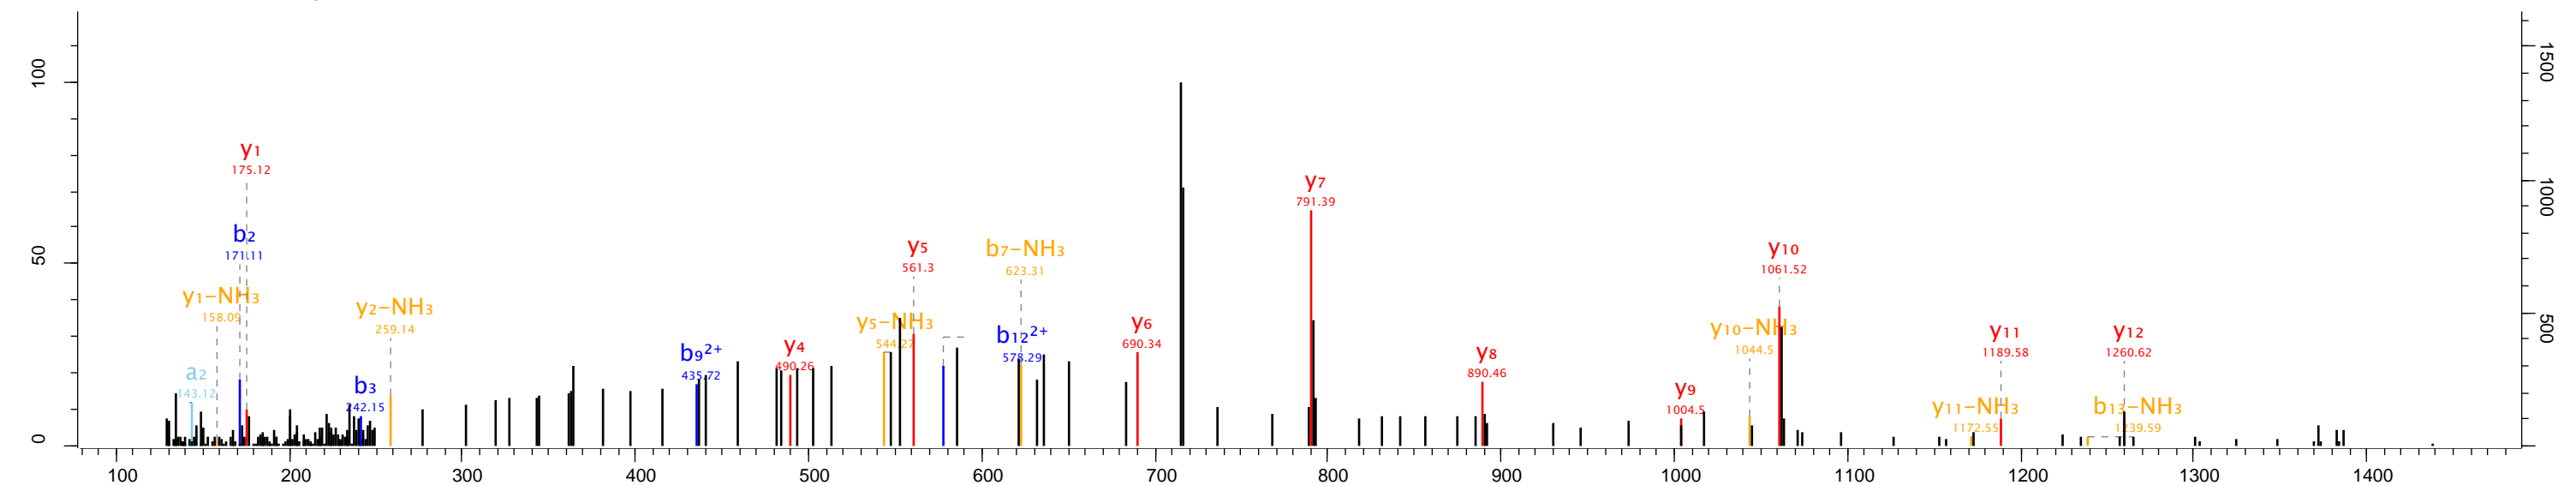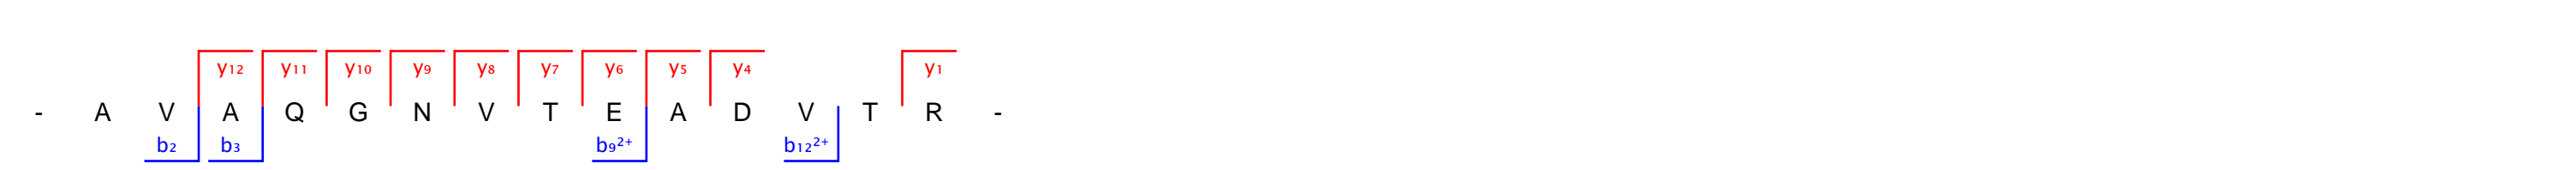

Raw file 2015-01-05\_CL02\_2Excl15sMaxInj70 Scan 17918 Method ITMS; HCD Score 143.64 m/z 760.42

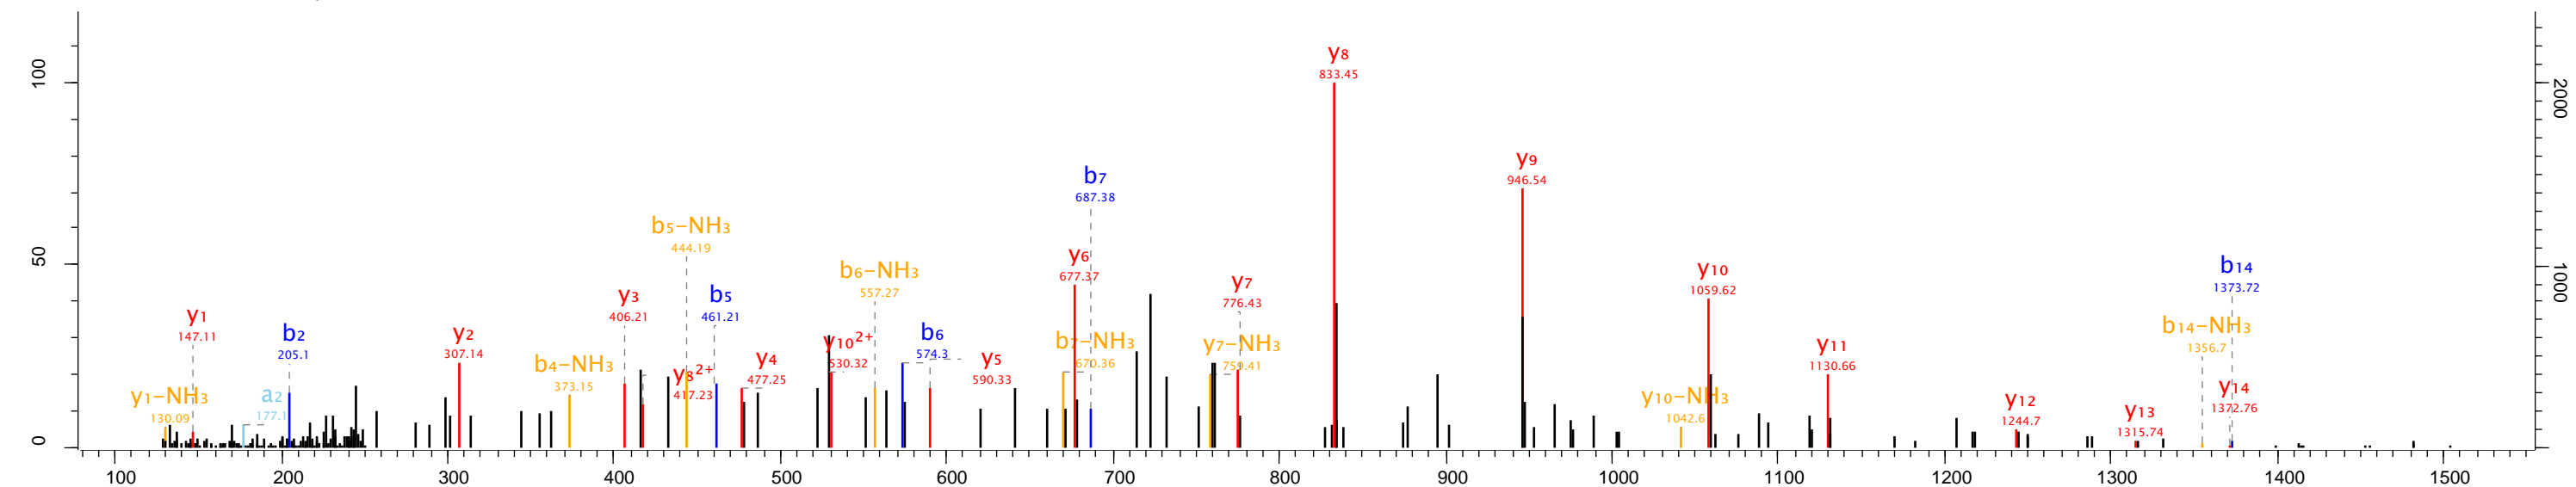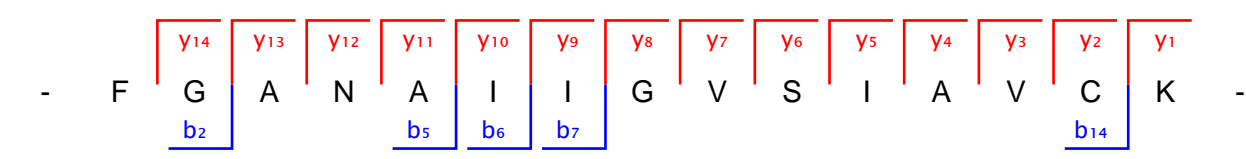

Spectral Annotation for Single-Peptide IDs in 16-cell Embryo using Q-OT-LIT

Raw file 2015-01-05\_CL02\_2Excl15sMaxInj70 Scan 17935 Method ITMS; HCD Score 112.62 m/z 760.42

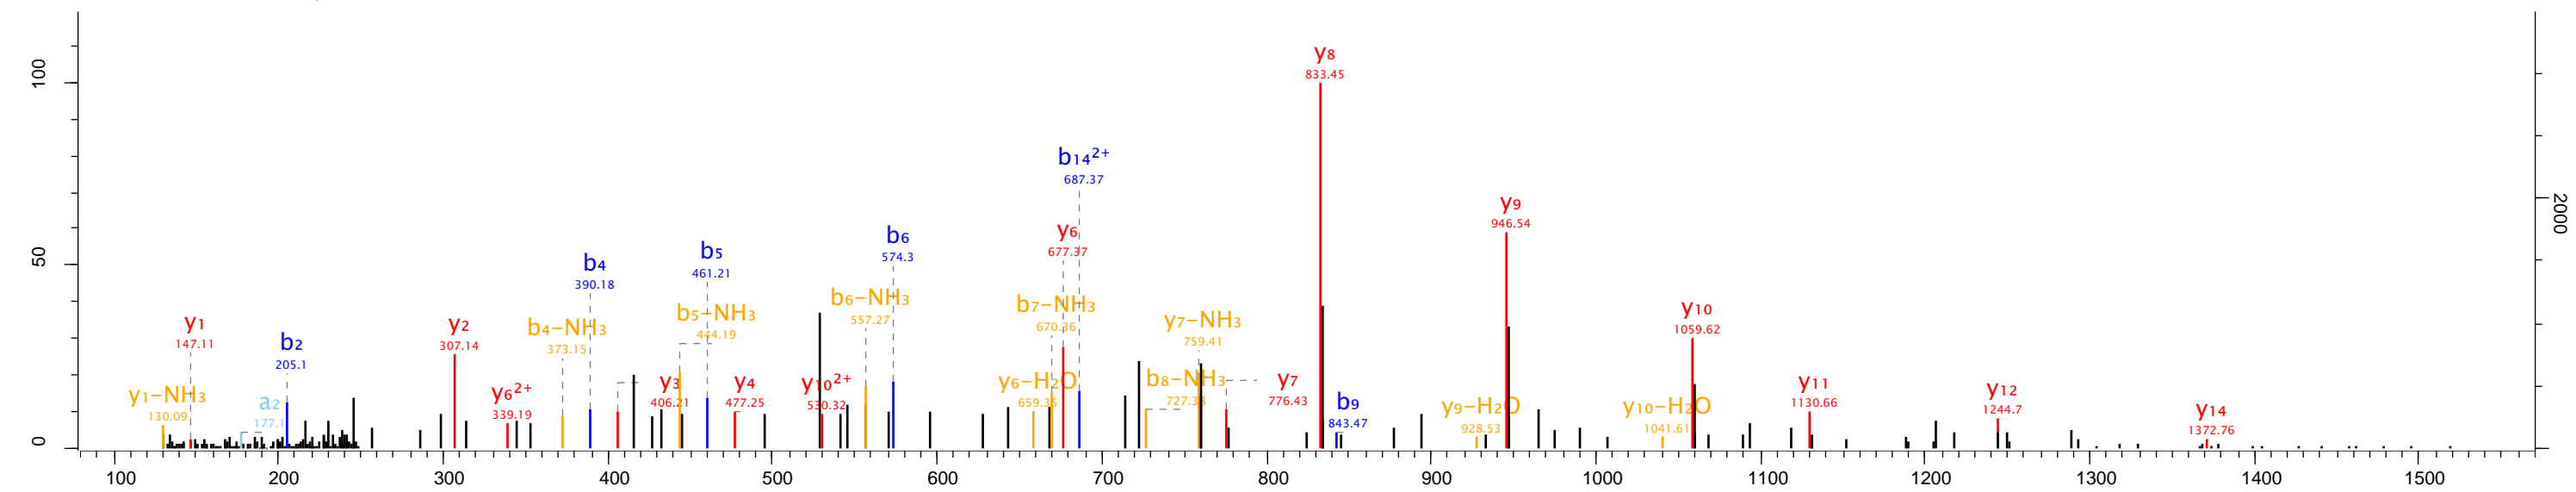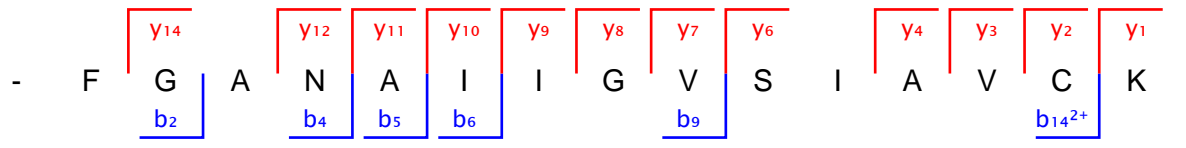

Spectral Annotation for Single-Peptide IDs in 16-cell Embryo using Q-OT-LIT

Raw file 2015-01-05\_CL02\_2Excl15sMaxInj70 Scan 17950 Method ITMS; HCD Score 93.11 m/z 760.42

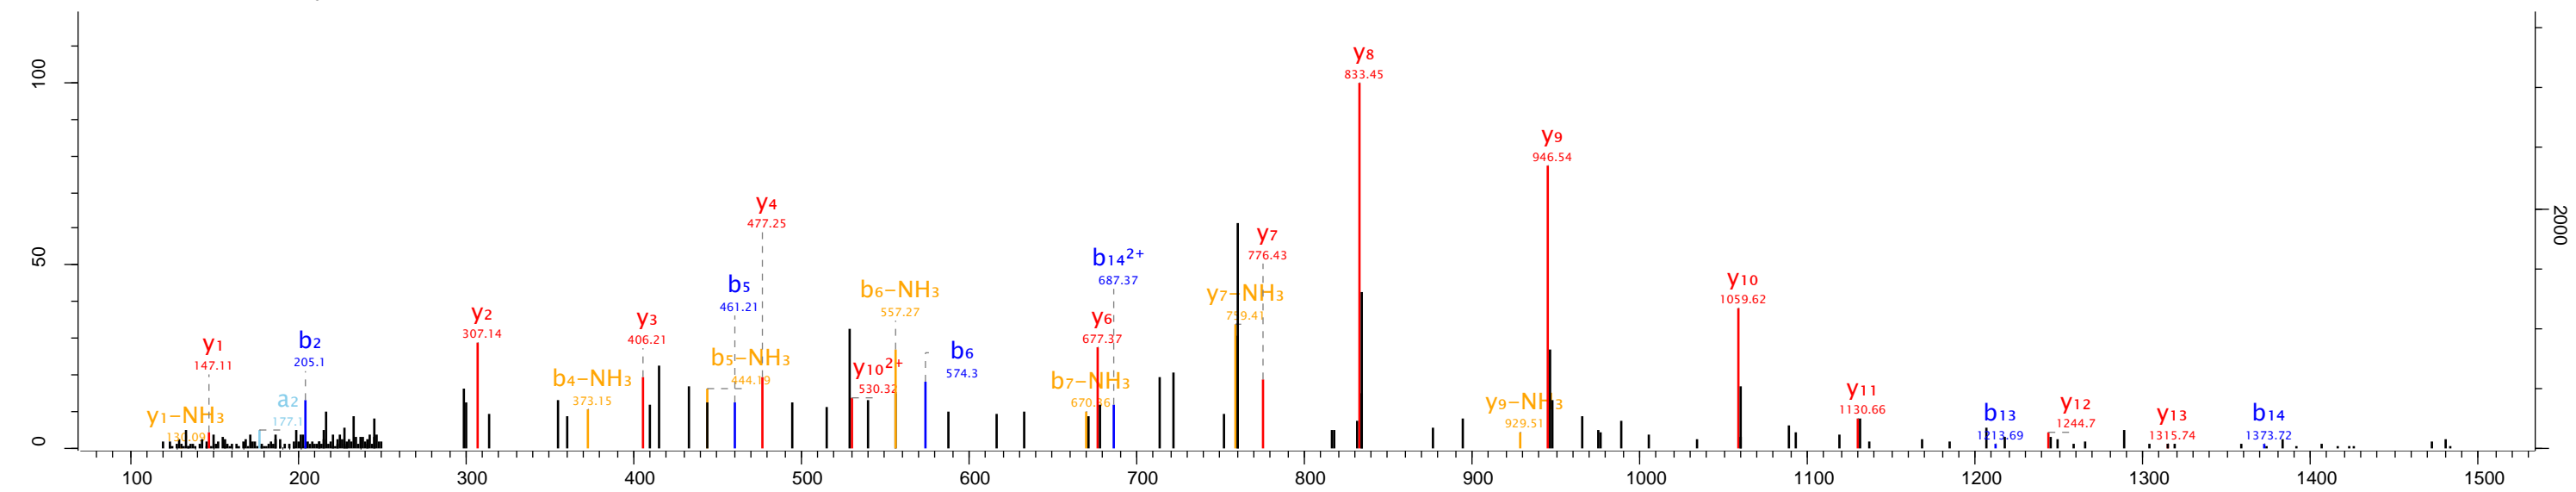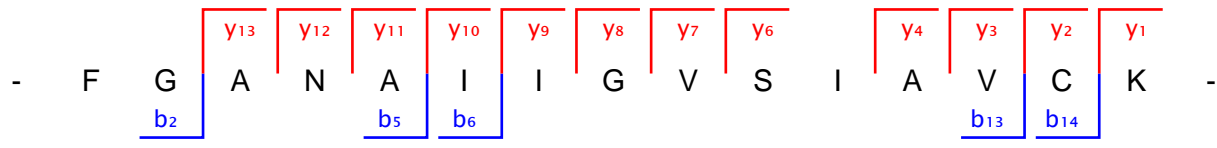

Raw file: 2015-01-05\_CL02\_2Excl15sMaxInj70  
 Scan: 17962 Method: ITMS; HCD Score: 112.17 m/z: 760.42

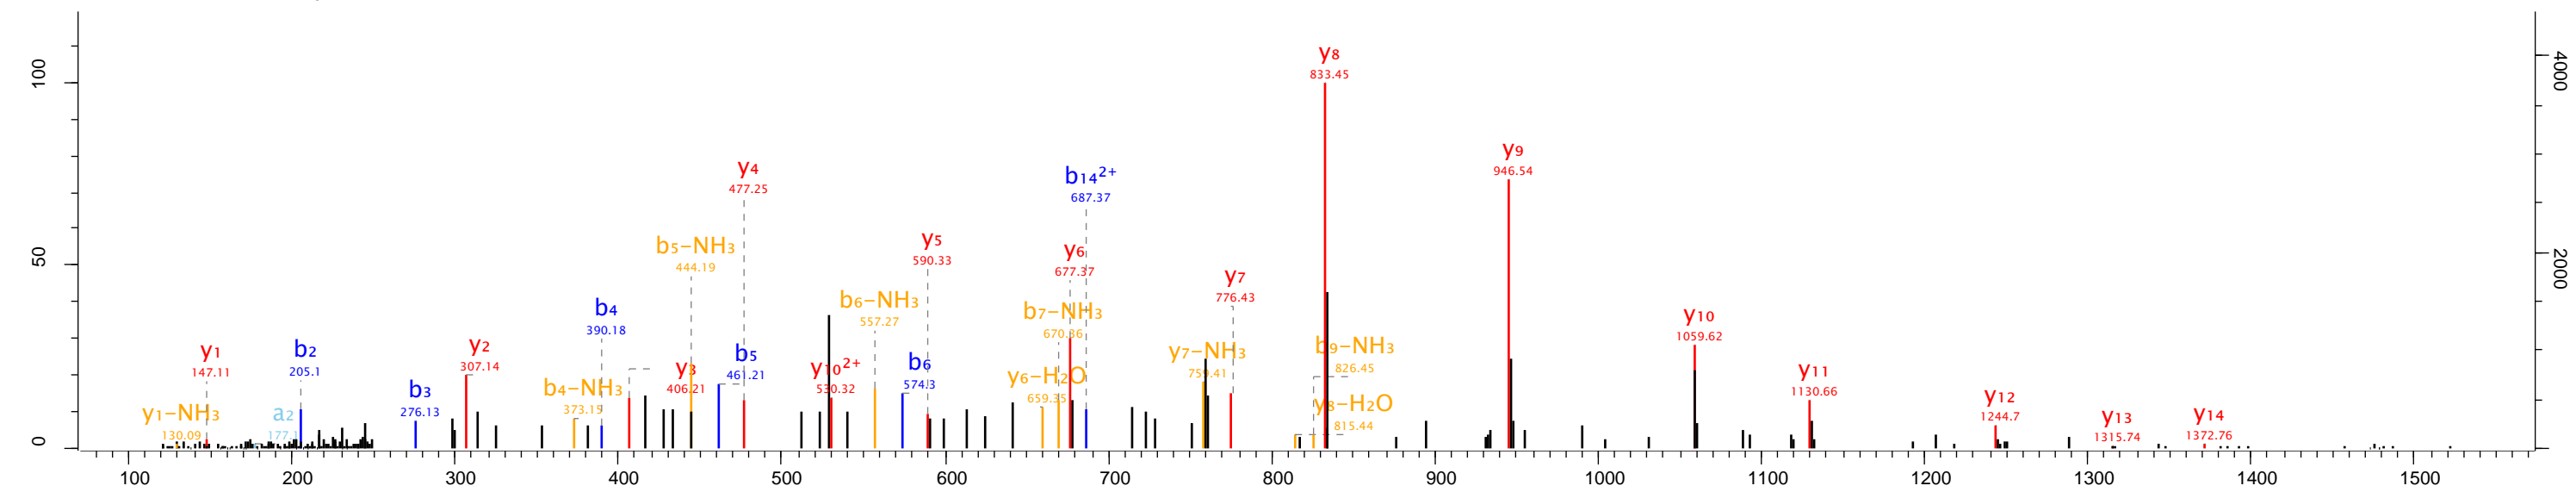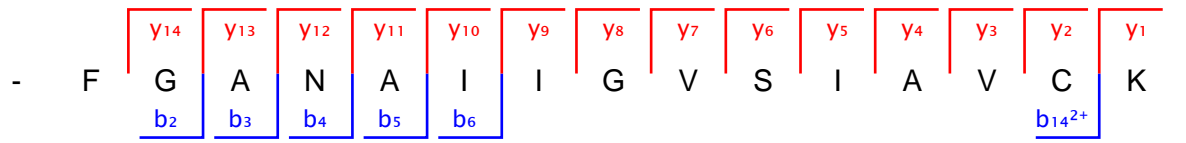



Raw file 2015-01-05\_CL02\_2Excl15sMaxInj70 Scan 18000 Method ITMS; HCD Score 55.55 m/z 780.37

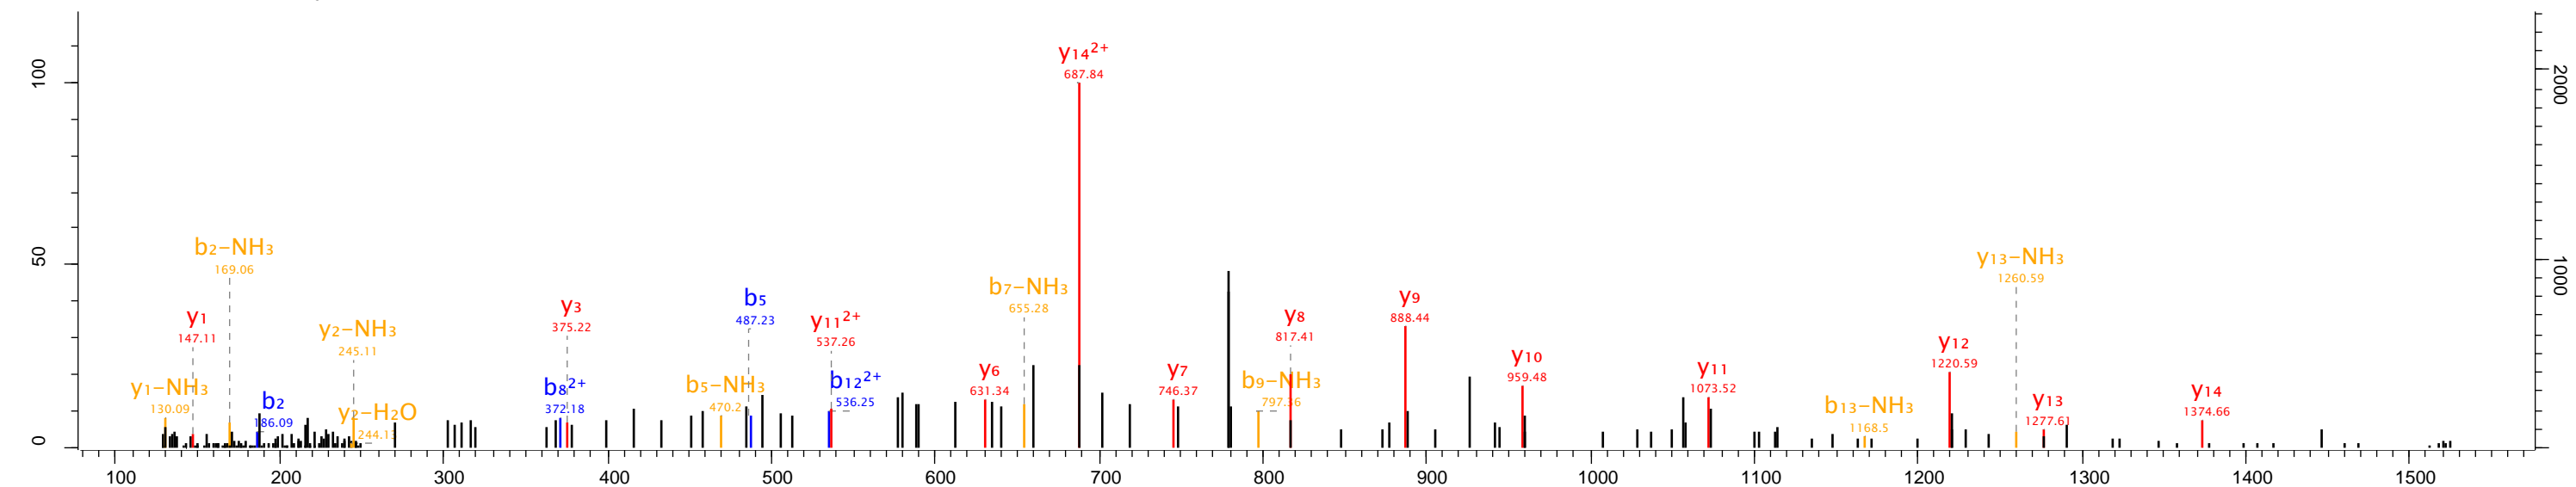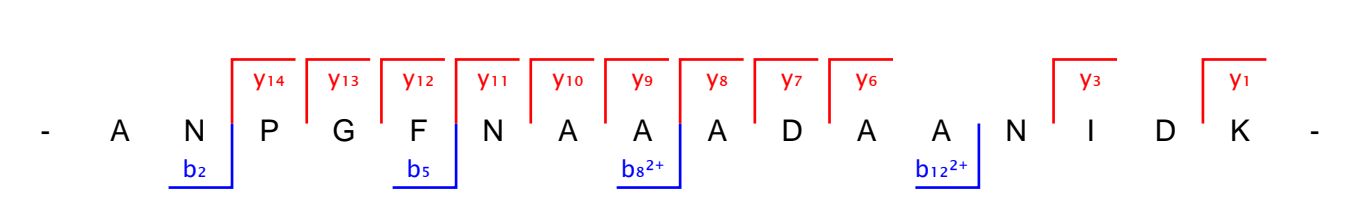

Raw file 2015-01-05\_CL02\_2Excl15sMaxInj70 Scan 18245 Method ITMS; HCD Score 117.53 m/z 1008.81

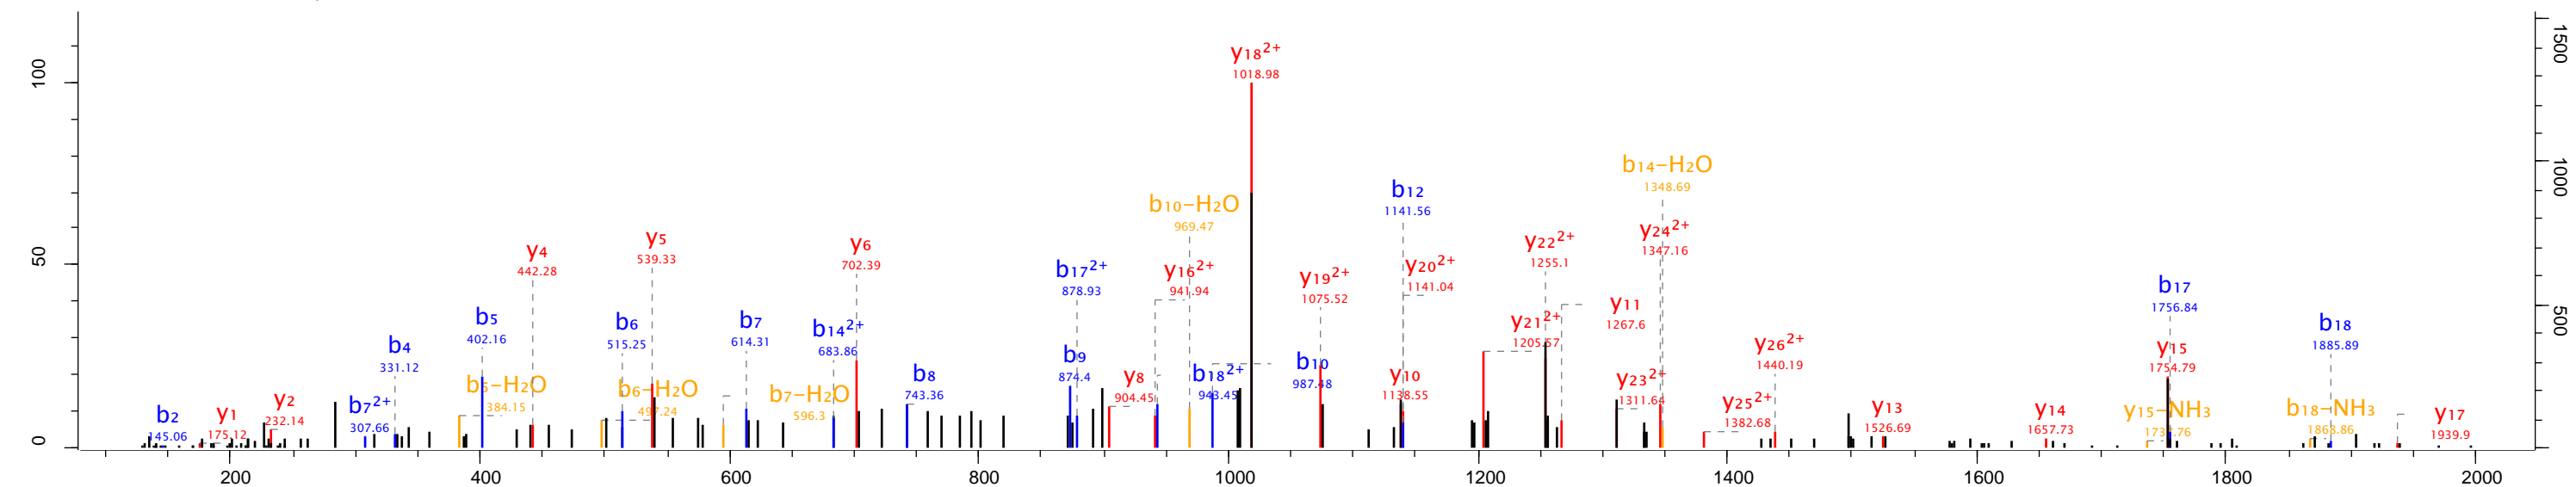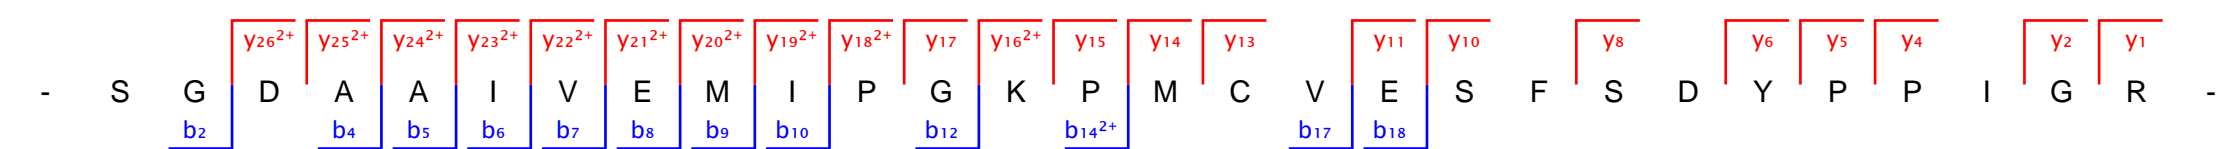

Raw file 2015-01-05\_CL02\_2Excl15sMaxInj70 Scan 18249 Method ITMS; HCD Score 89.43 m/z 976.83

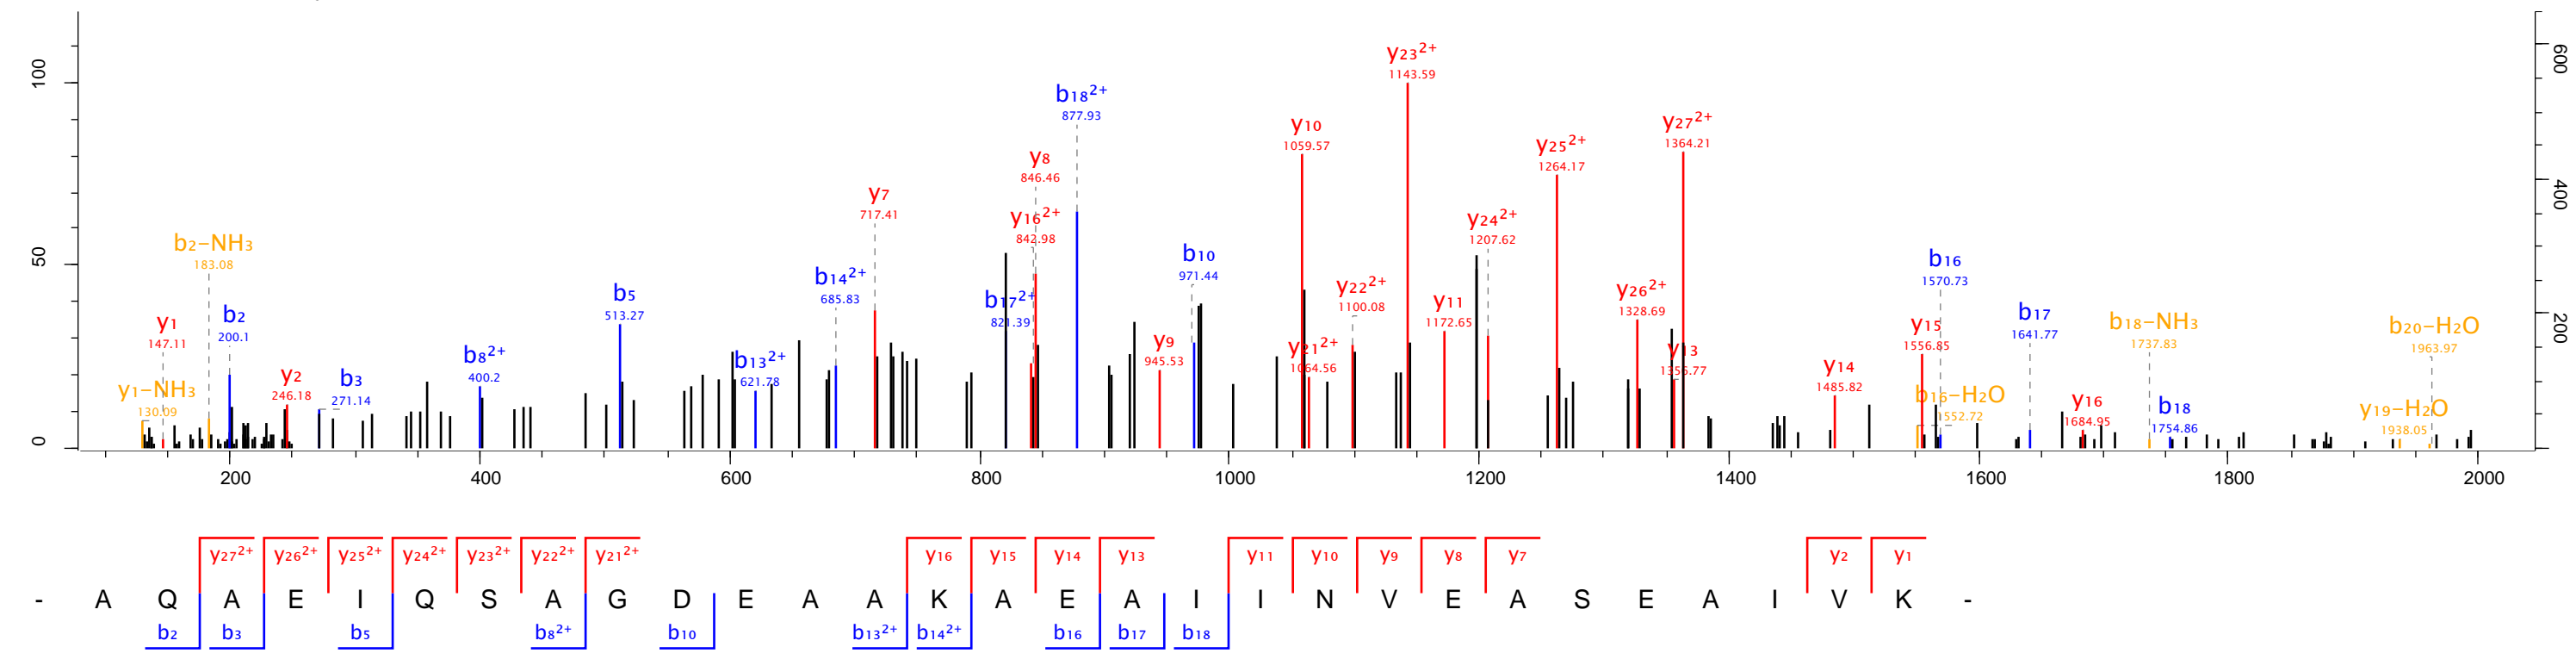

Spectral Annotation for Single-Peptide IDs in 16-cell Embryo using Q-OT-LIT

Raw file 2015-01-05\_CL02\_2Excl15sMaxInj70 Scan 18258 Method ITMS; HCD Score 89.08 m/z 1008.48

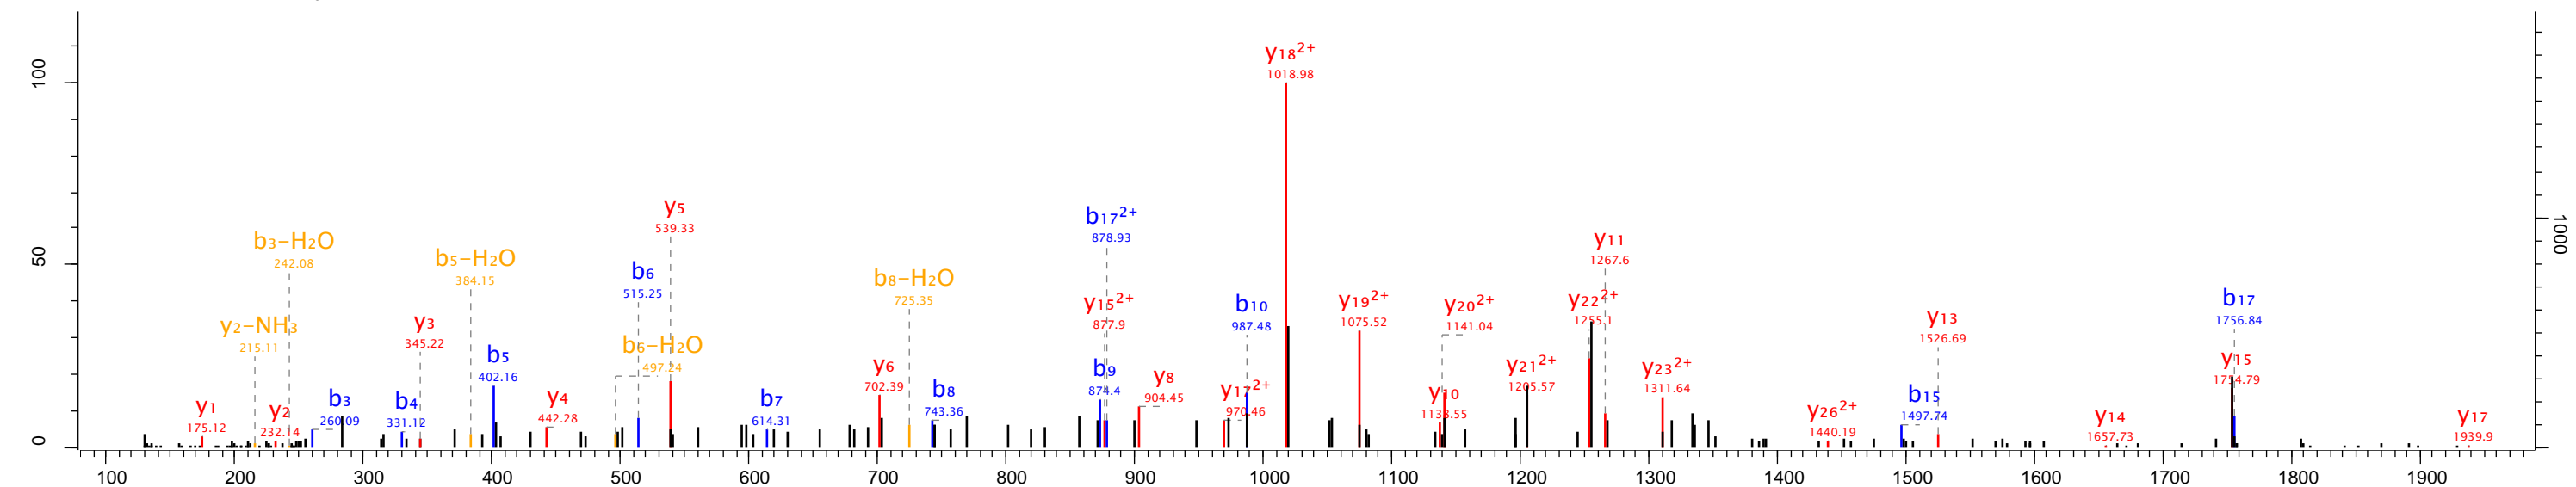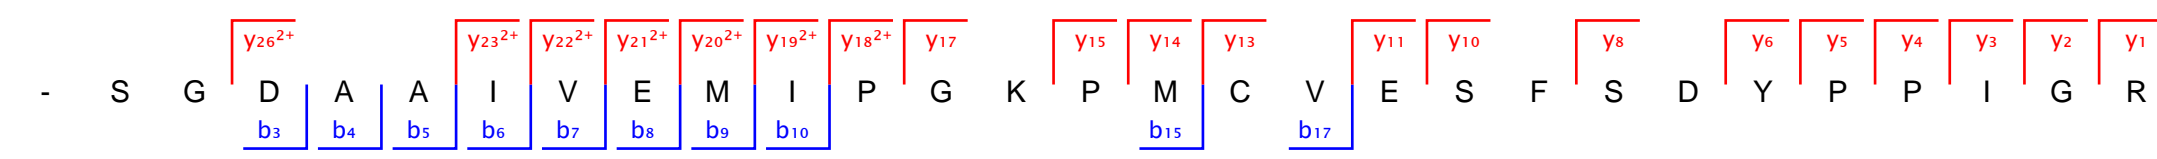

Spectral Annotation for Single-Peptide IDs in 16-cell Embryo using Q-OT-LIT

Raw file 2015-01-05\_CL02\_2Excl15sMaxInj70 Scan 18293 Method ITMS; HCD Score 91.6 m/z 976.84

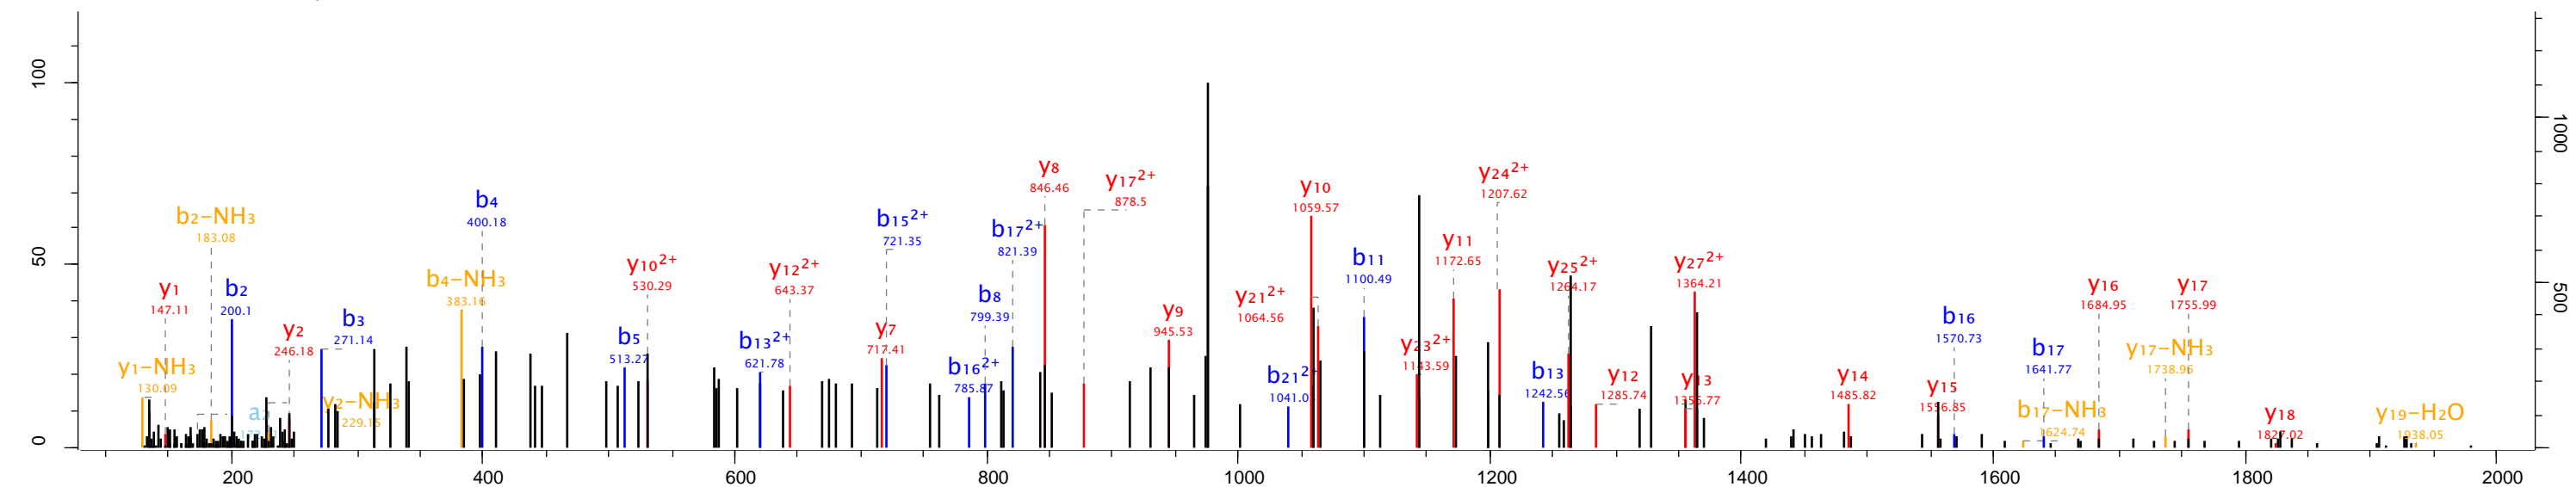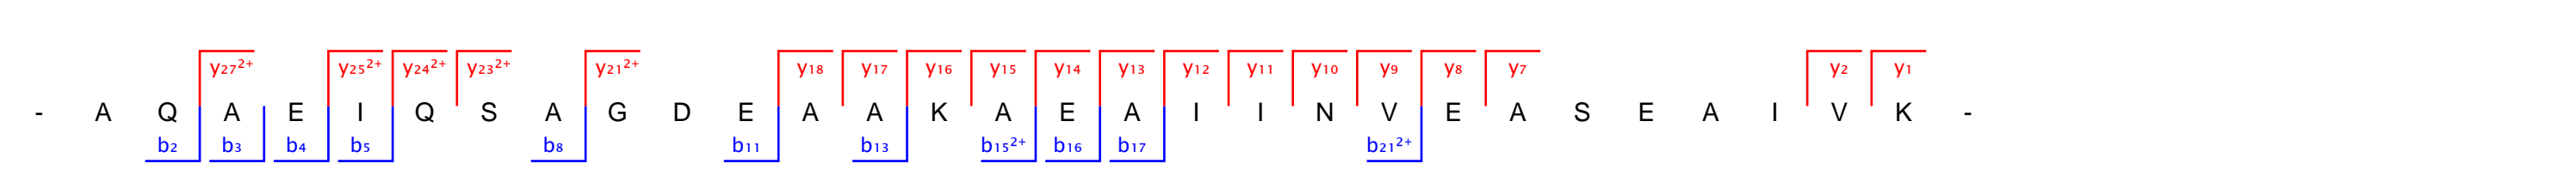

Spectral Annotation for Single-Peptide IDs in 16-cell Embryo using Q-OT-LIT

Raw file 2015-01-05\_CL02\_2Excl15sMaxInj70 Scan 18314 Method ITMS; HCD Score 96.39 m/z 976.17

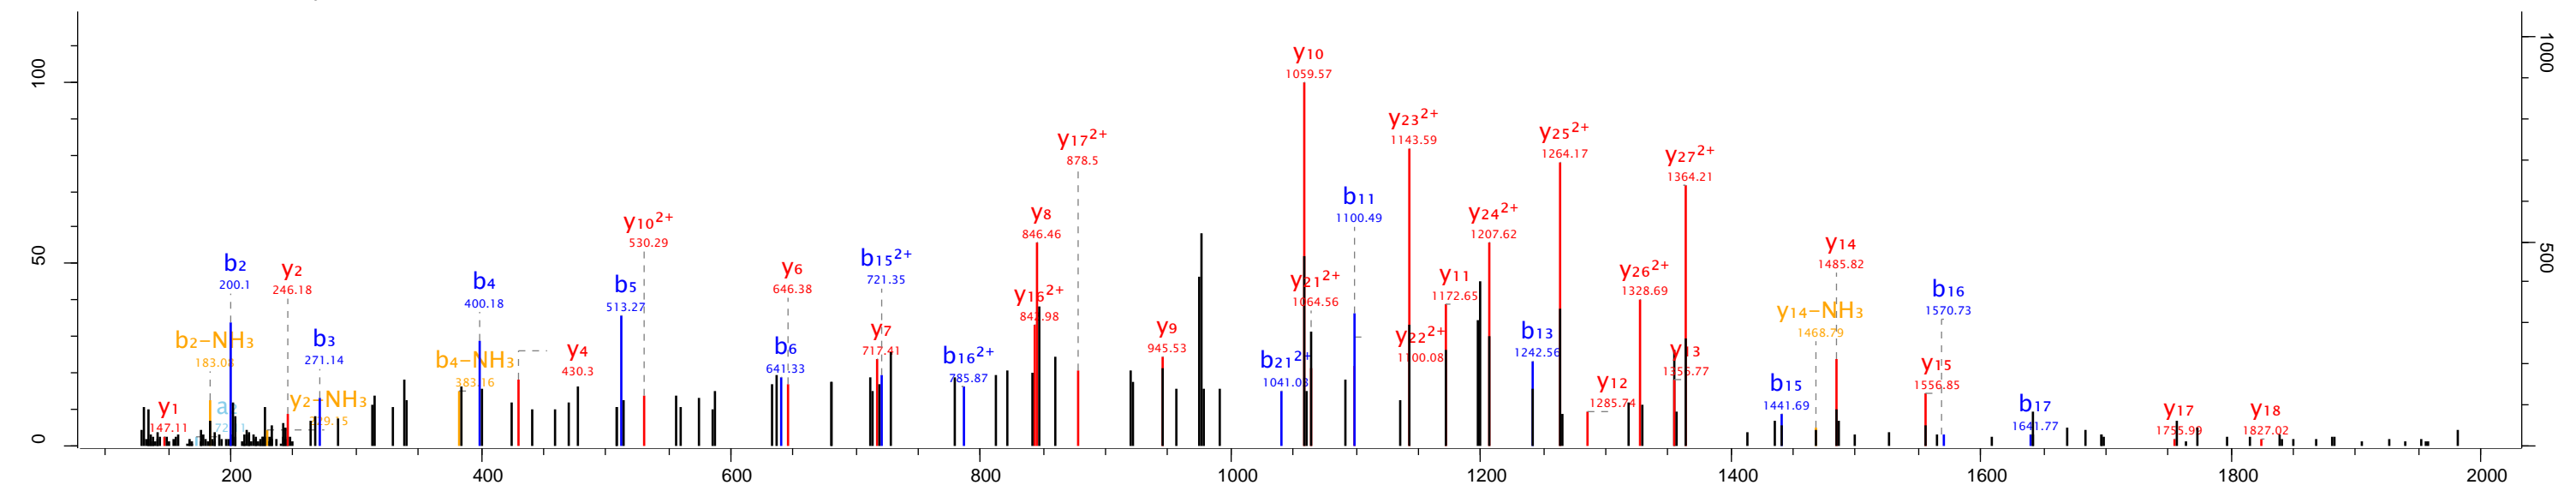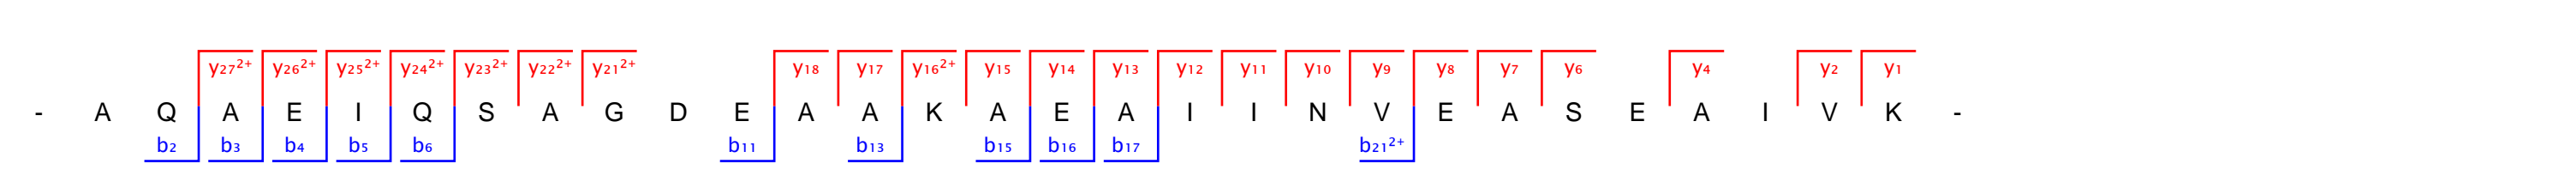

Raw file 2015-01-05\_CL02\_2Excl15sMaxInj70 Scan 18322 Method ITMS; HCD Score 101.42 m/z 1013.49

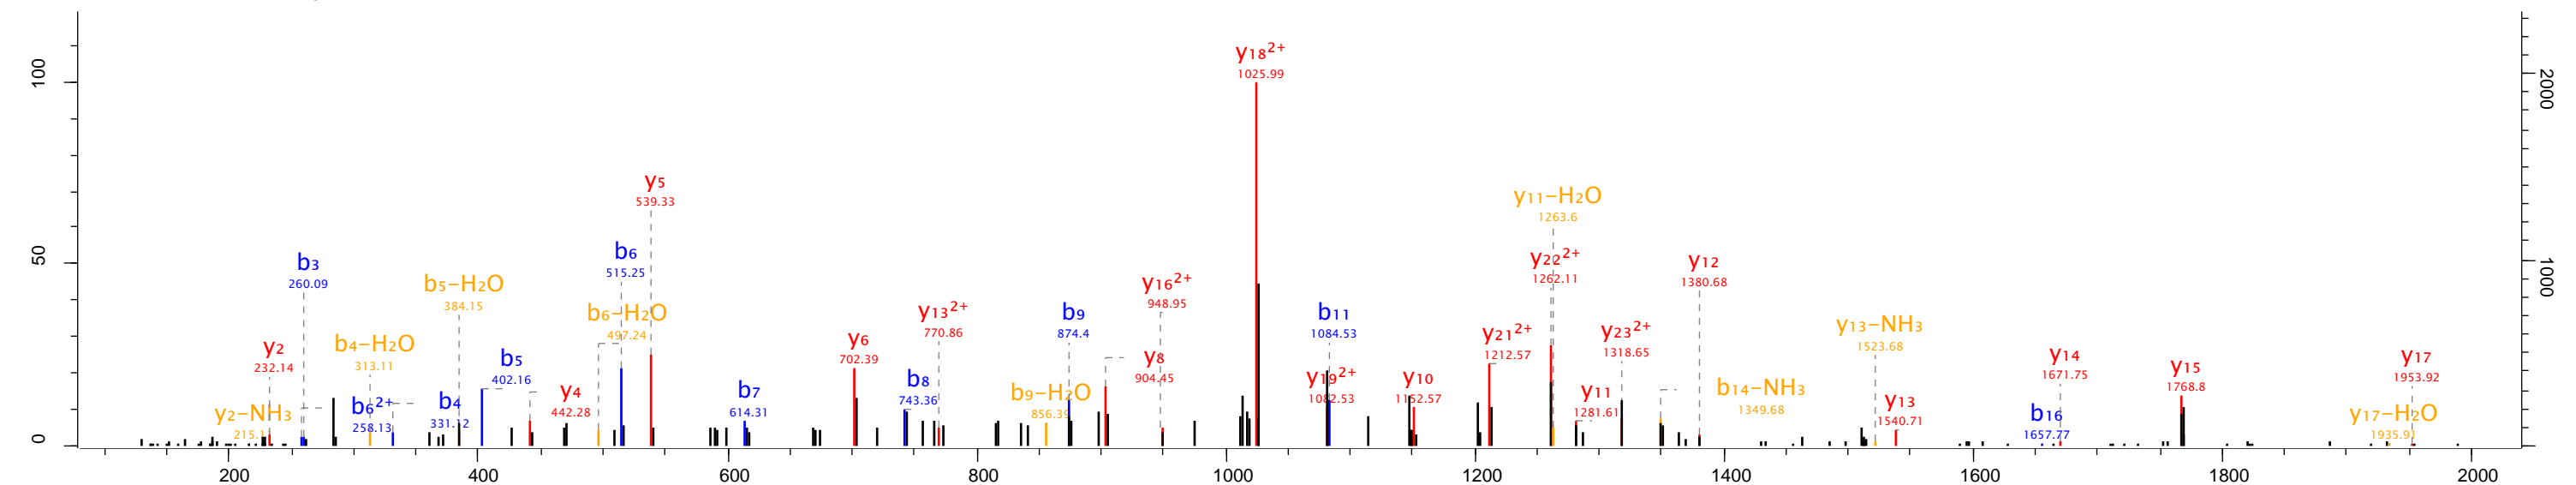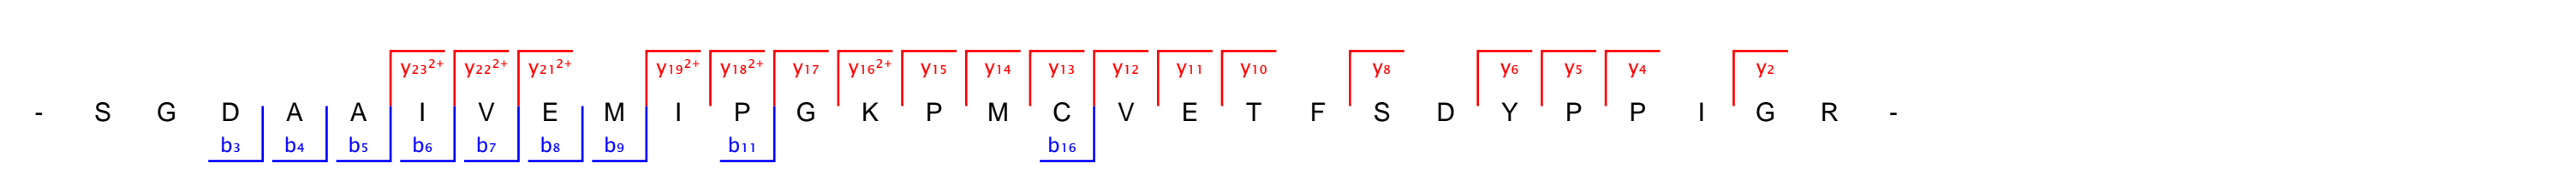

Raw file Scan Method Score m/z  
 2015-01-05\_CL02\_2Excl15sMaxInj70 18325 ITMS; HCD 103.85 976.5

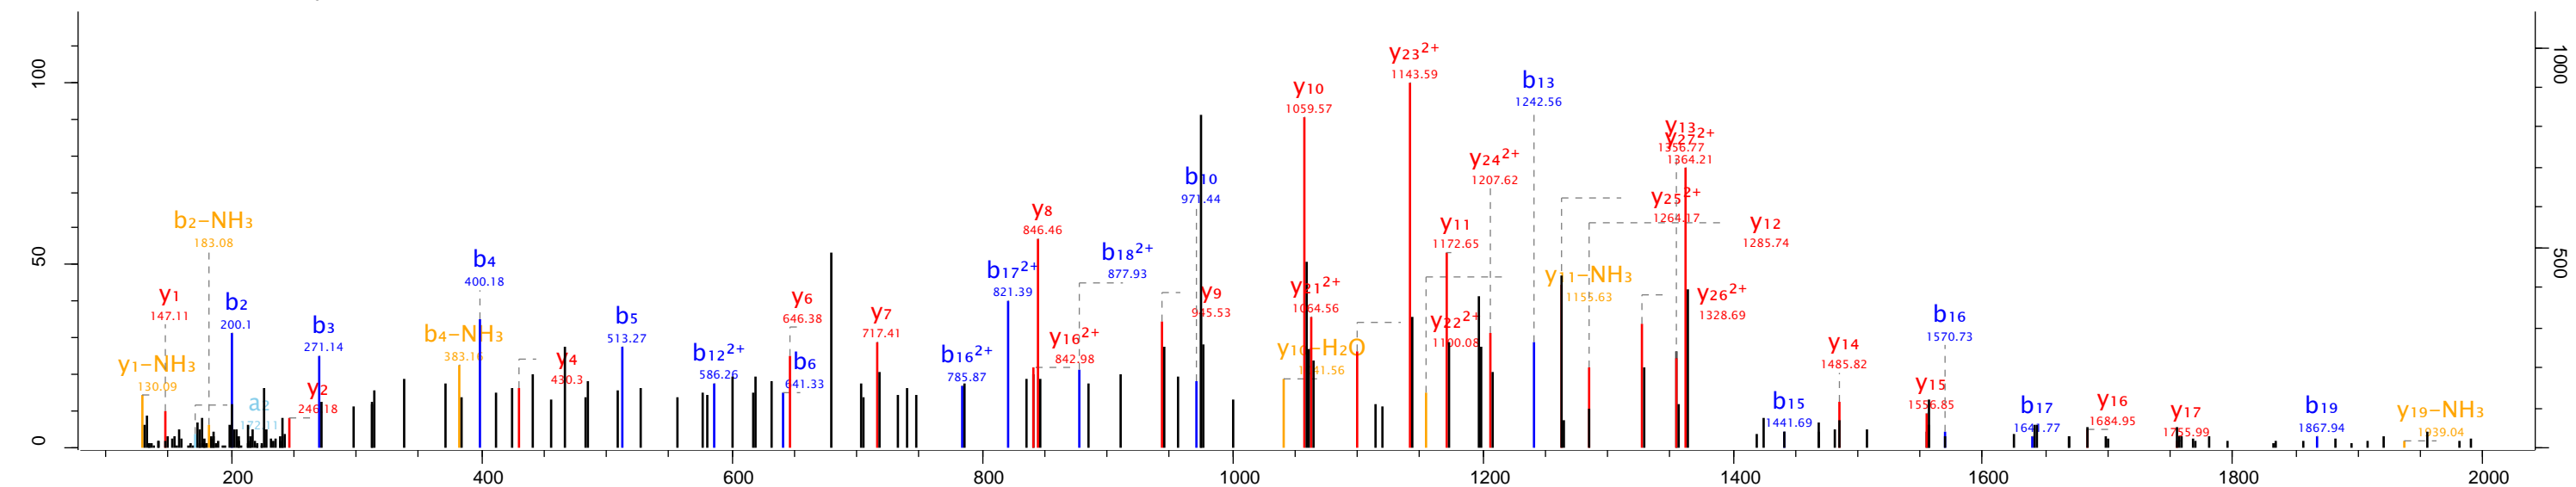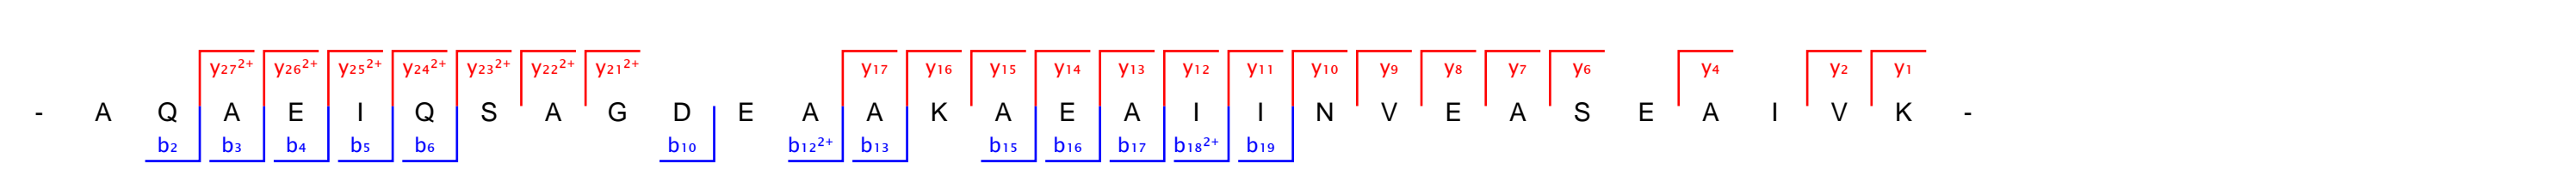



Raw file 2015-01-05\_CL02\_2Excl15sMaxInj70 Scan 18347 Method ITMS; HCD Score 93.39 m/z 1013.82

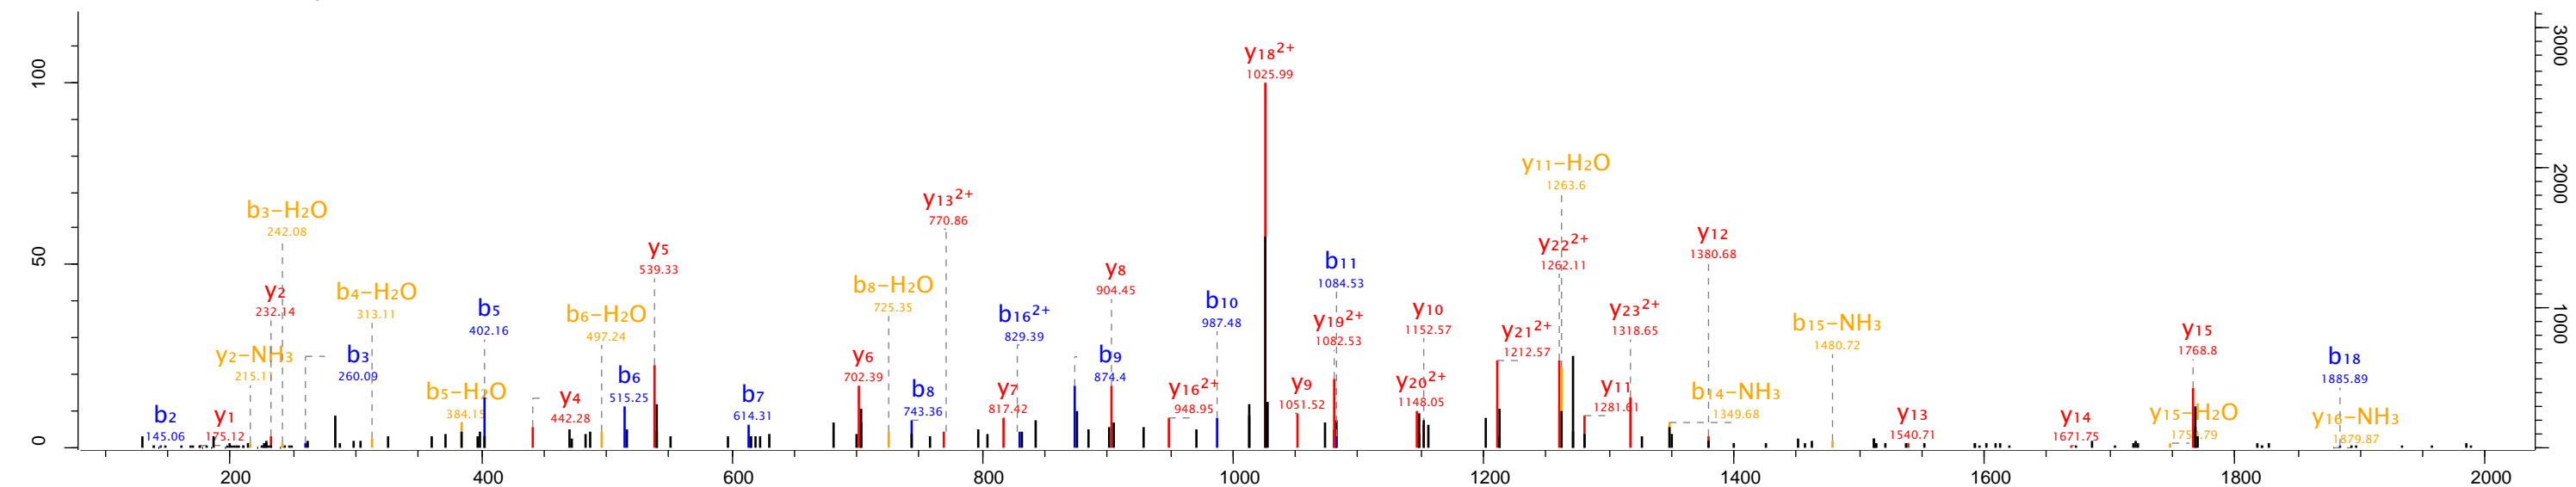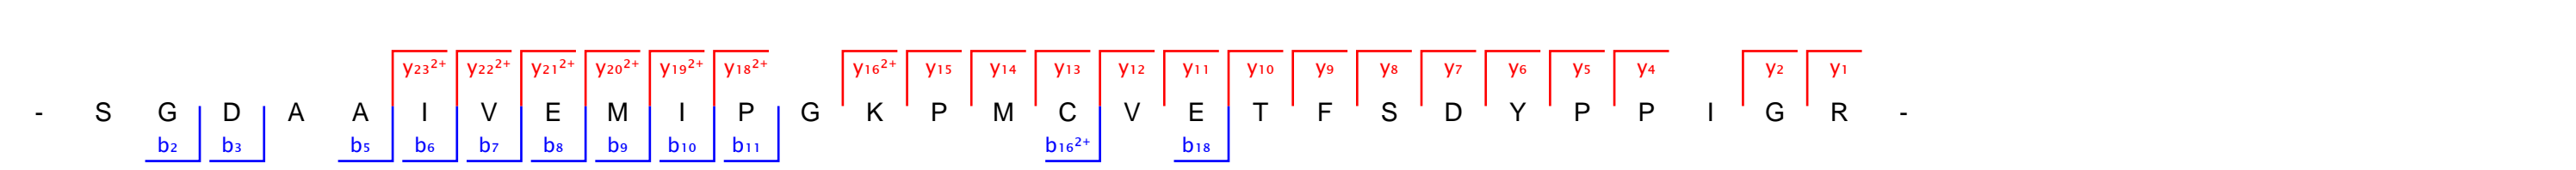

Spectral Annotation for Single-Peptide IDs in 16-cell Embryo using Q-OT-LIT

Raw file Scan Method Score m/z  
 2015-01-05\_CL02\_2Excl15sMaxInj70 18362 ITMS; HCD 144.23 976.5

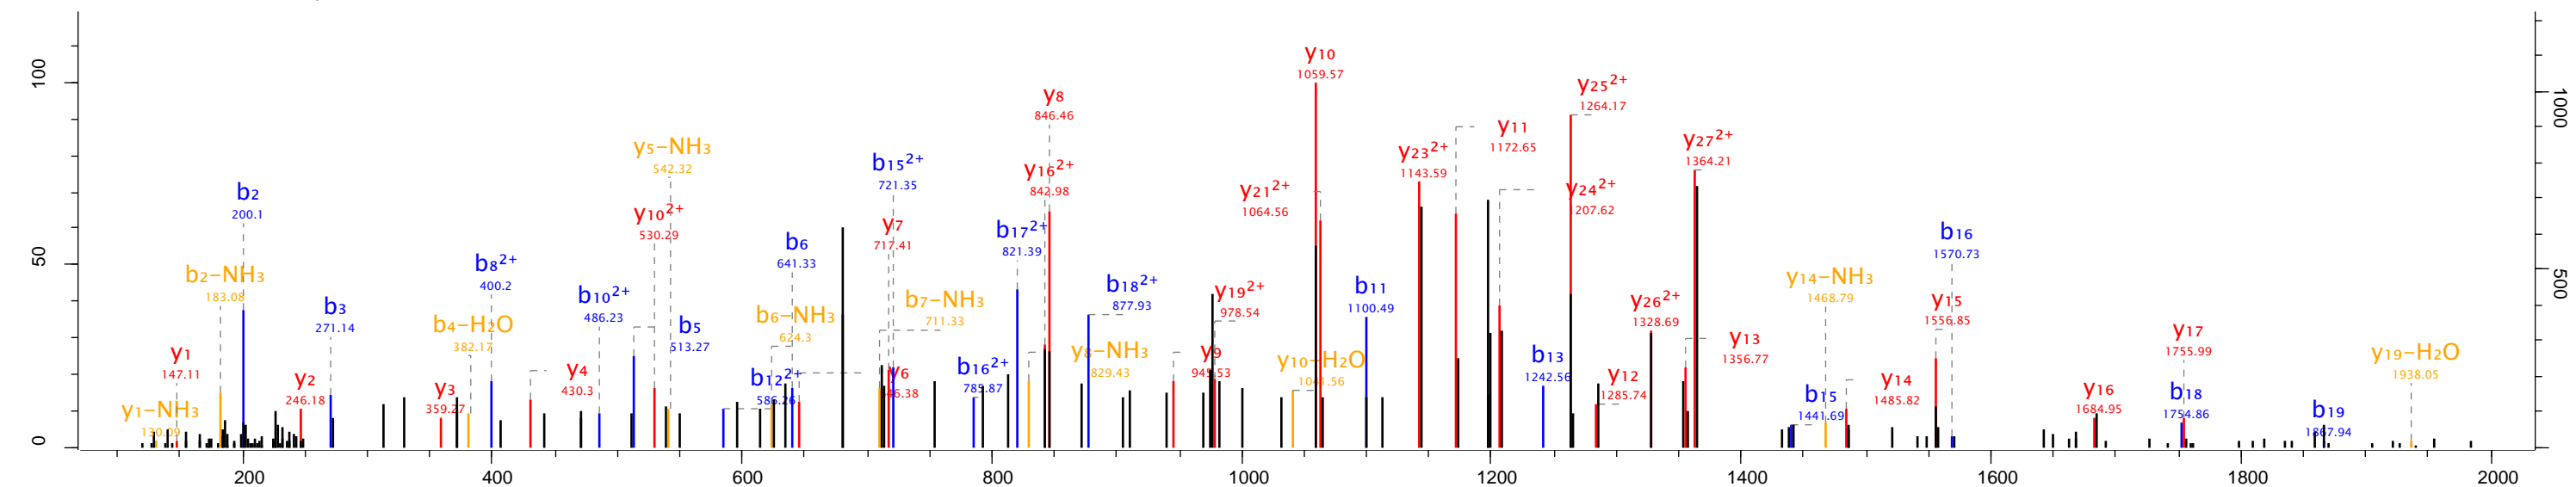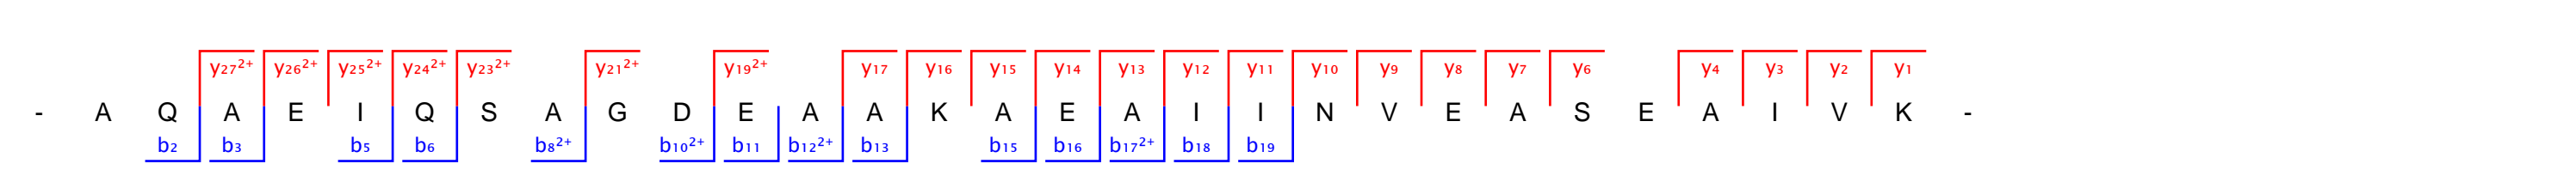

Raw file: 2015-01-05\_CL02\_2Excl15sMaxInj70  
 Scan: 18369 Method: ITMS; HCD Score: 76 m/z: 976.17

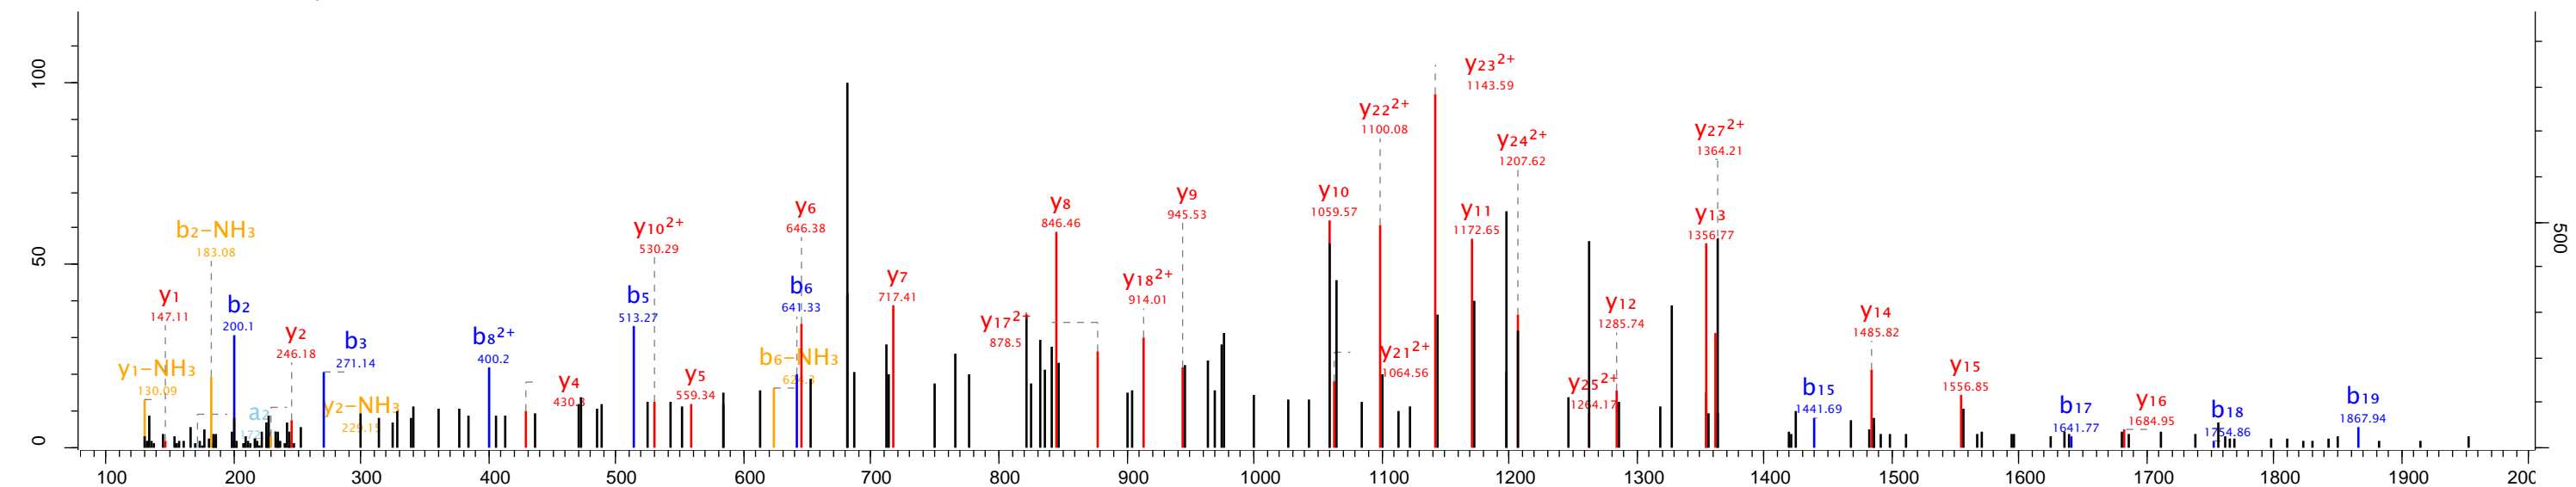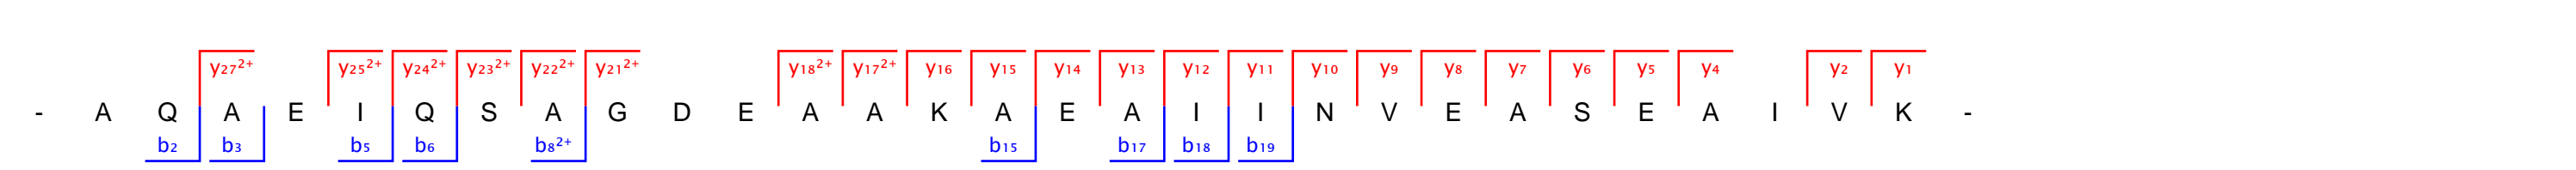

Spectral Annotation for Single-Peptide IDs in 16-cell Embryo using Q-OT-LIT

Raw file: 2015-01-05\_CL02\_2Excl15sMaxInj70  
 Scan: 18370 Method: ITMS; HCD Score: 115.81 m/z: 1013.82

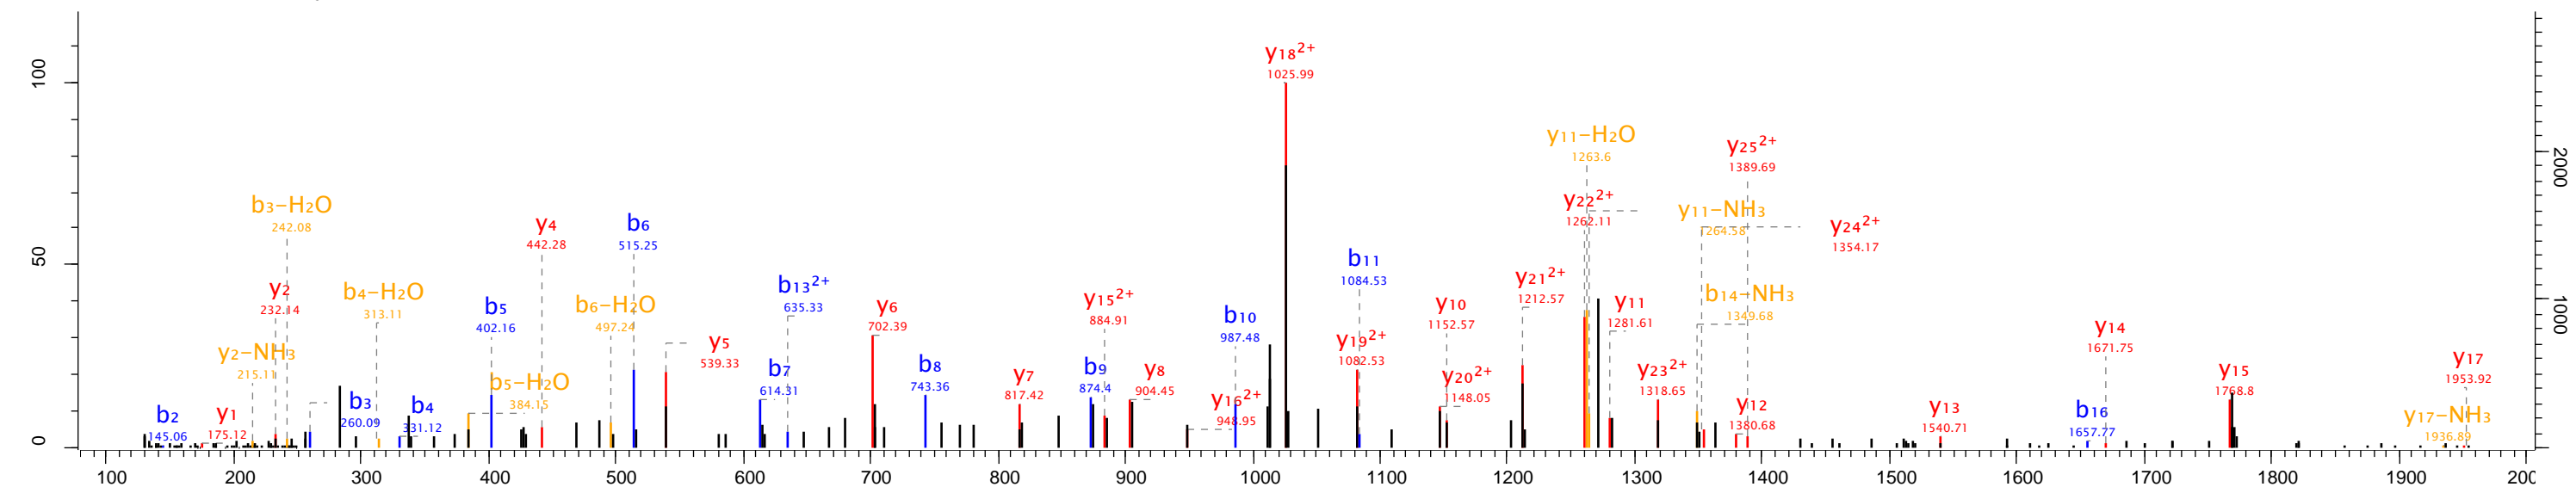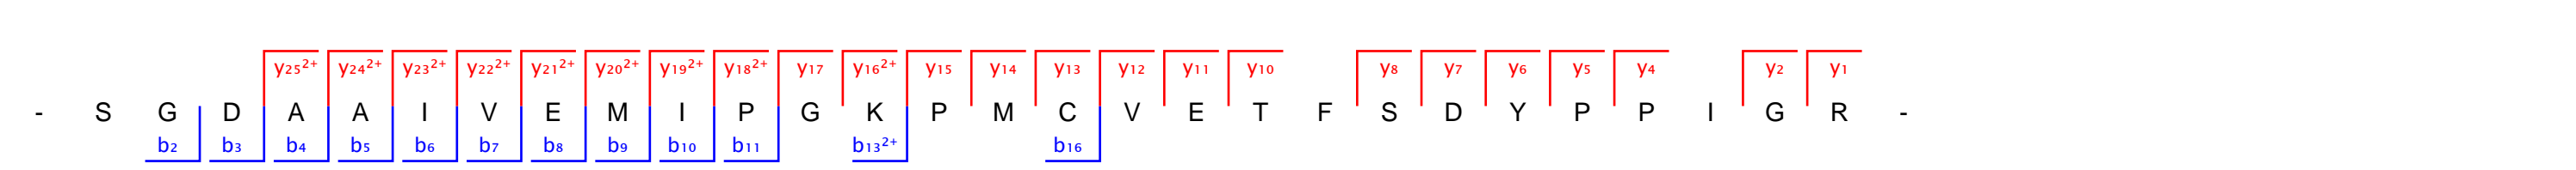

Raw file 2015-01-05\_CL02\_2Excl15sMaxInj70 Scan 18386 Method ITMS; HCD Score 94.4 m/z 976.5

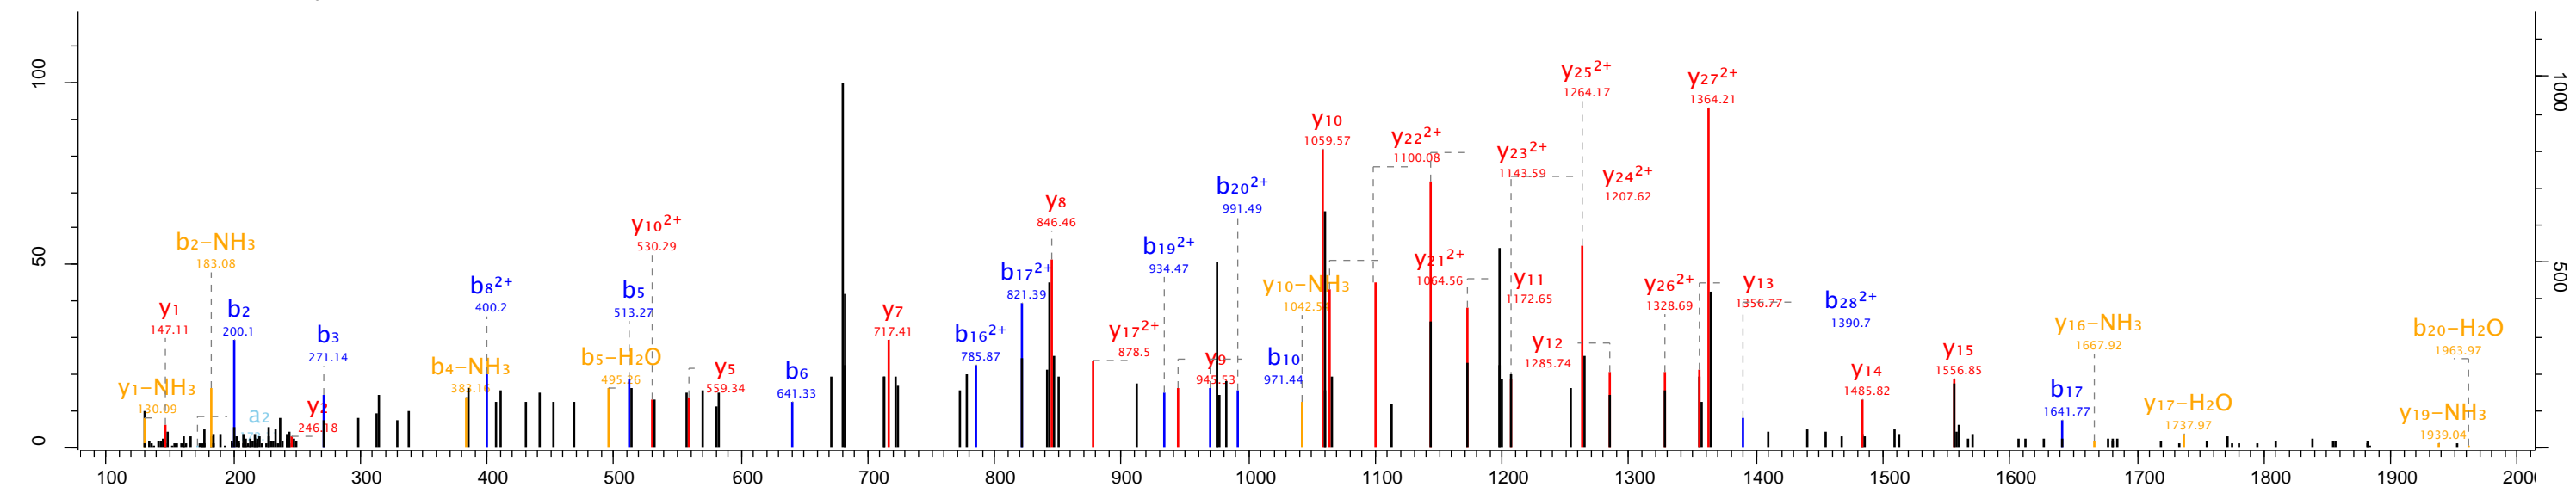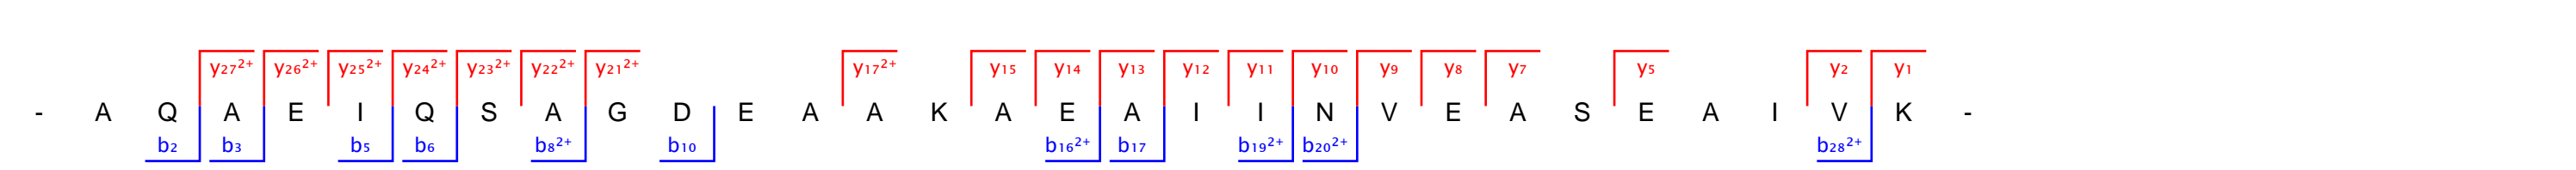

Spectral Annotation for Single-Peptide IDs in 16-cell Embryo using Q-OT-LIT

Raw file: 2015-01-05\_CL02\_2Excl15sMaxInj70  
 Scan: 18394 Method: ITMS; HCD Score: 96.52 m/z: 976.5

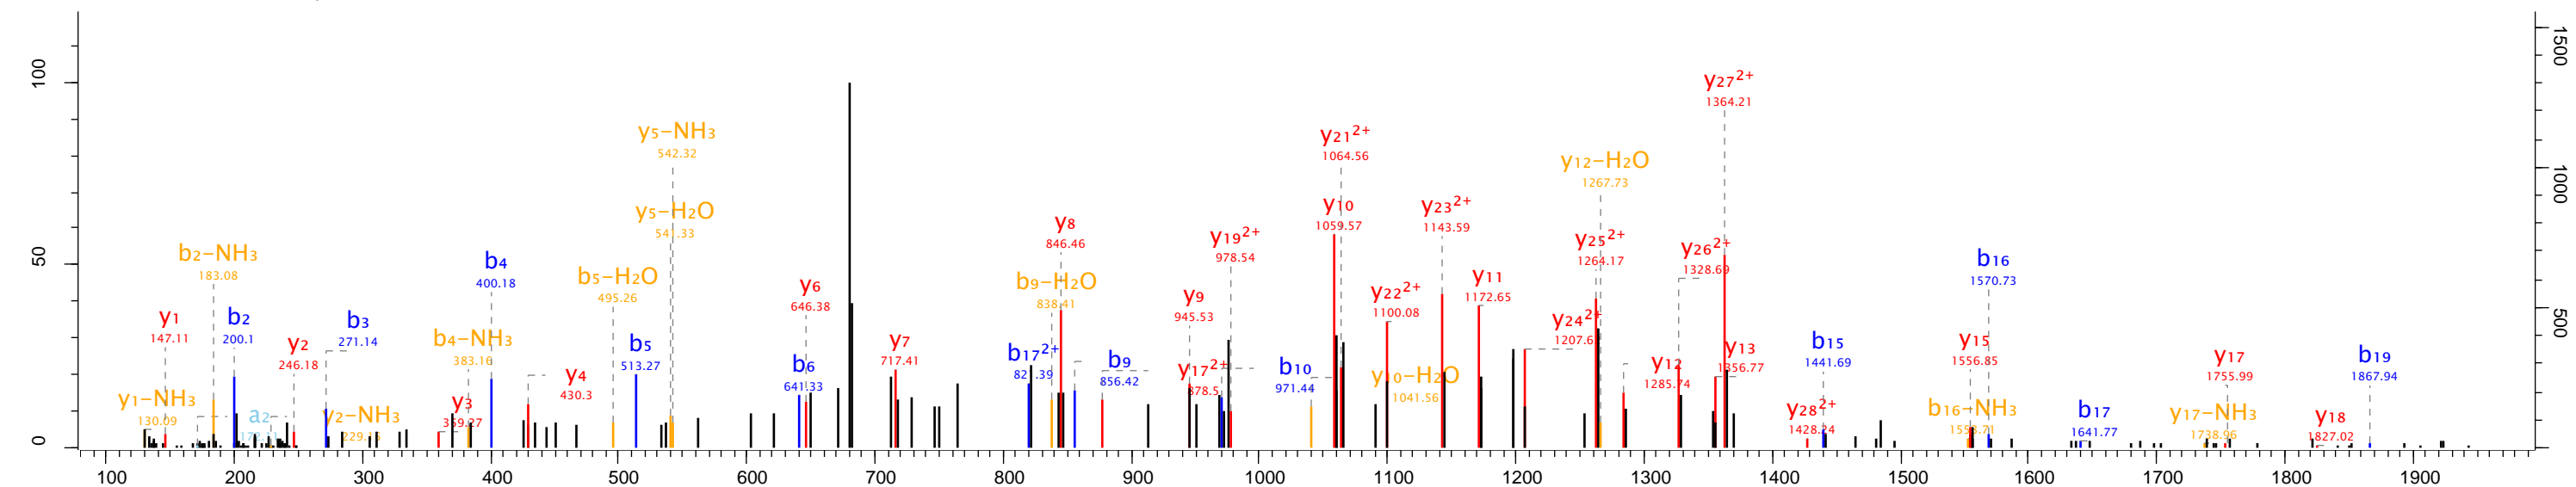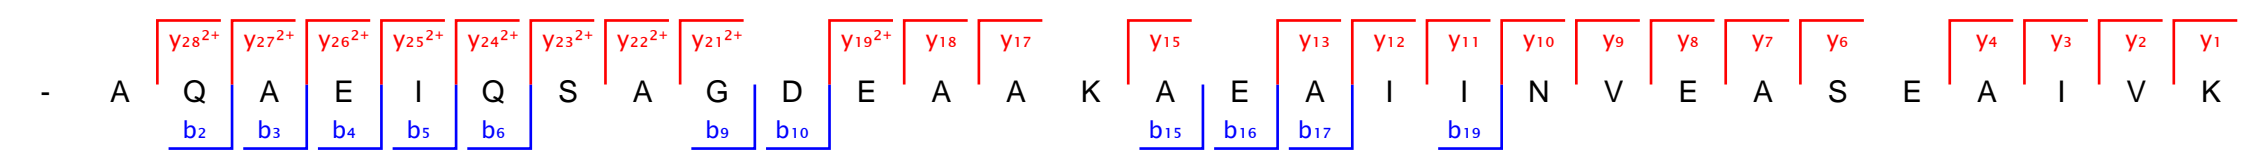

Spectral Annotation for Single-Peptide IDs in 16-cell Embryo using Q-OT-LIT

Raw file 2015-01-05\_CL02\_2Excl15sMaxInj70 Scan 18439 Method ITMS; HCD Score 64.04 m/z 1009.15

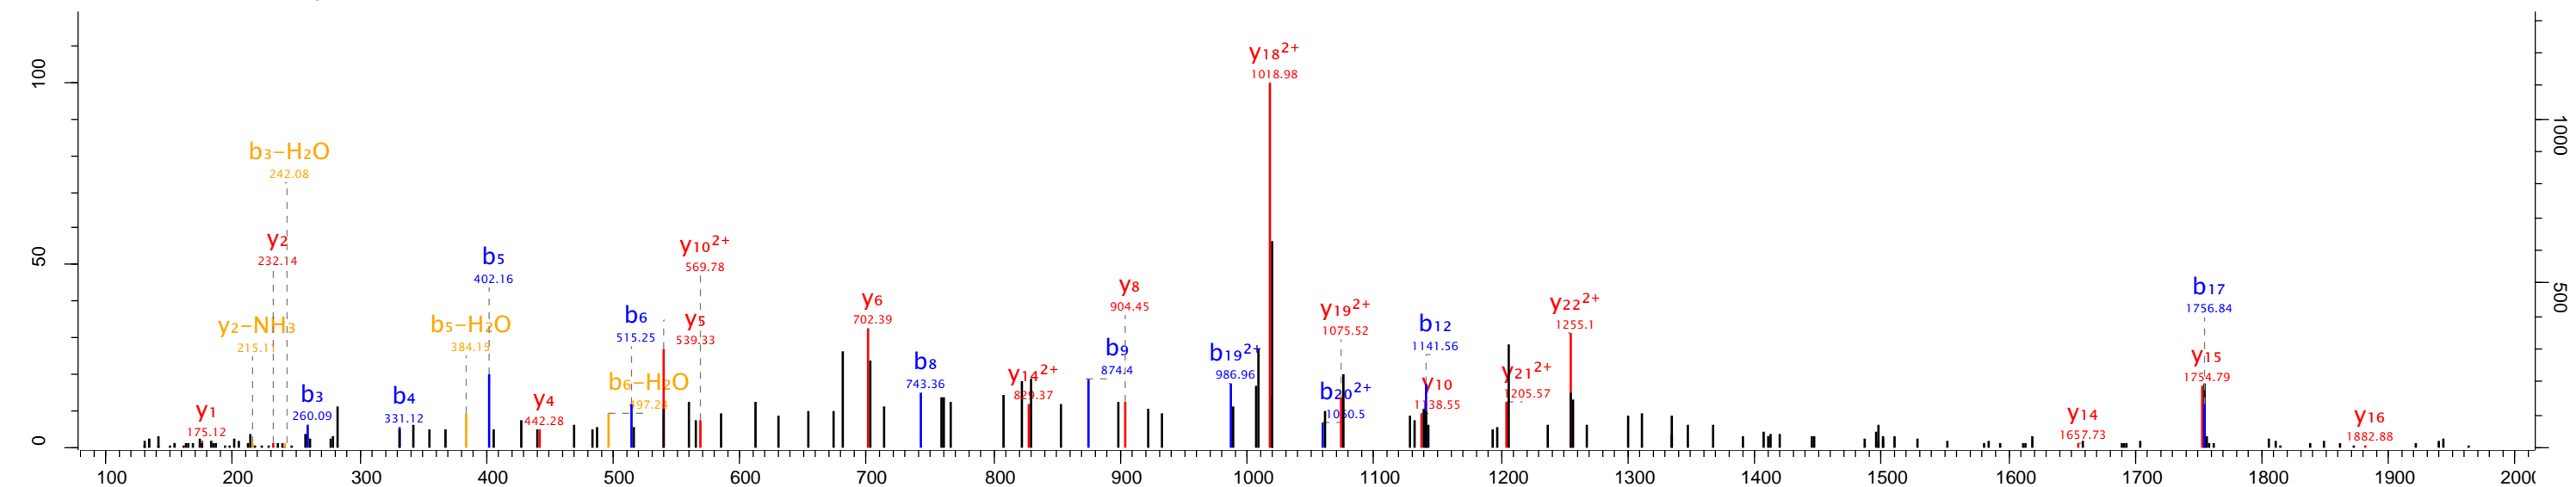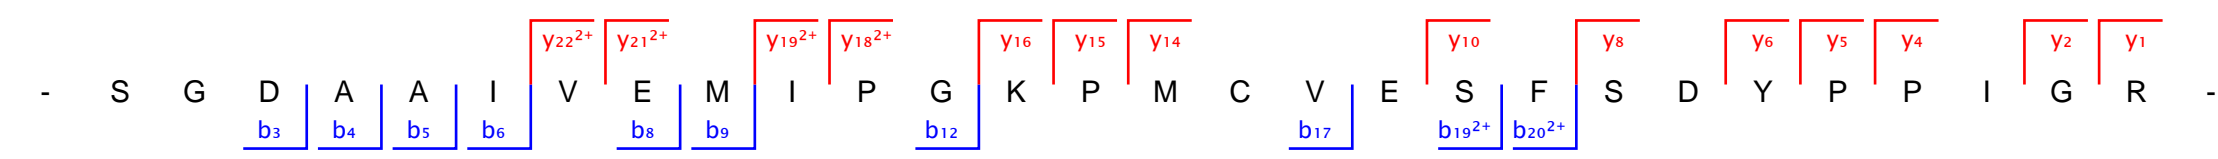

Raw file 2015-01-05\_CL02\_2Excl15sMaxInj70 Scan 18517 Method ITMS; HCD Score 97.62 m/z 1013.49

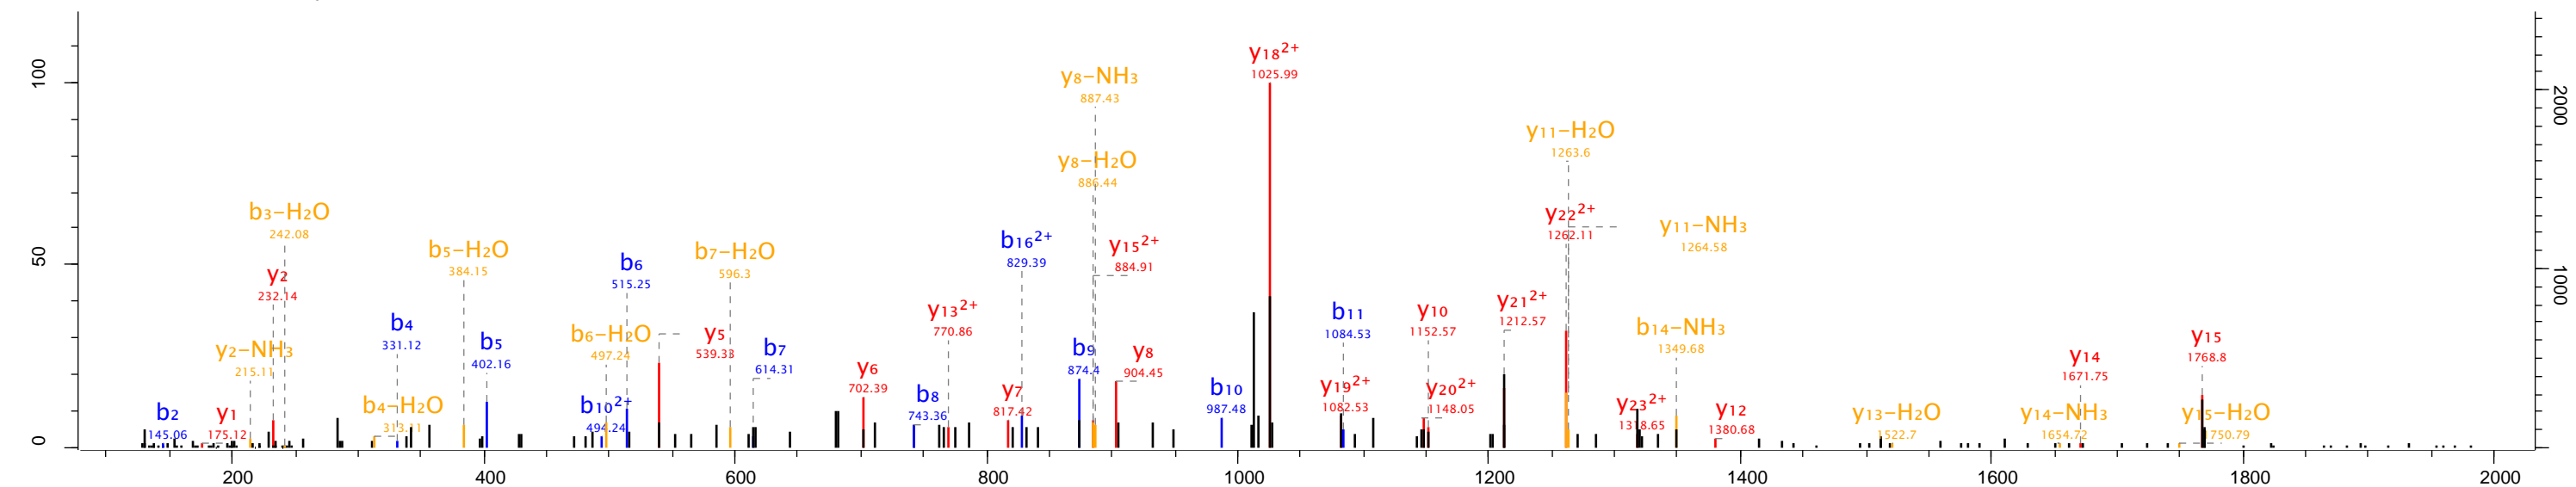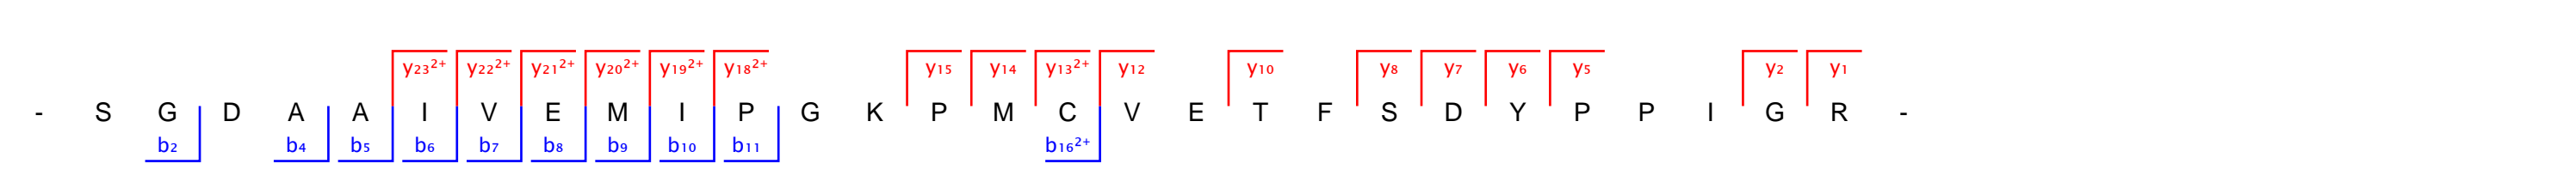



Raw file: 2015-01-05\_CL02\_2Excl15sMaxInj70  
 Scan: 18573 Method: ITMS; HCD Score: 87.65 m/z: 846.43

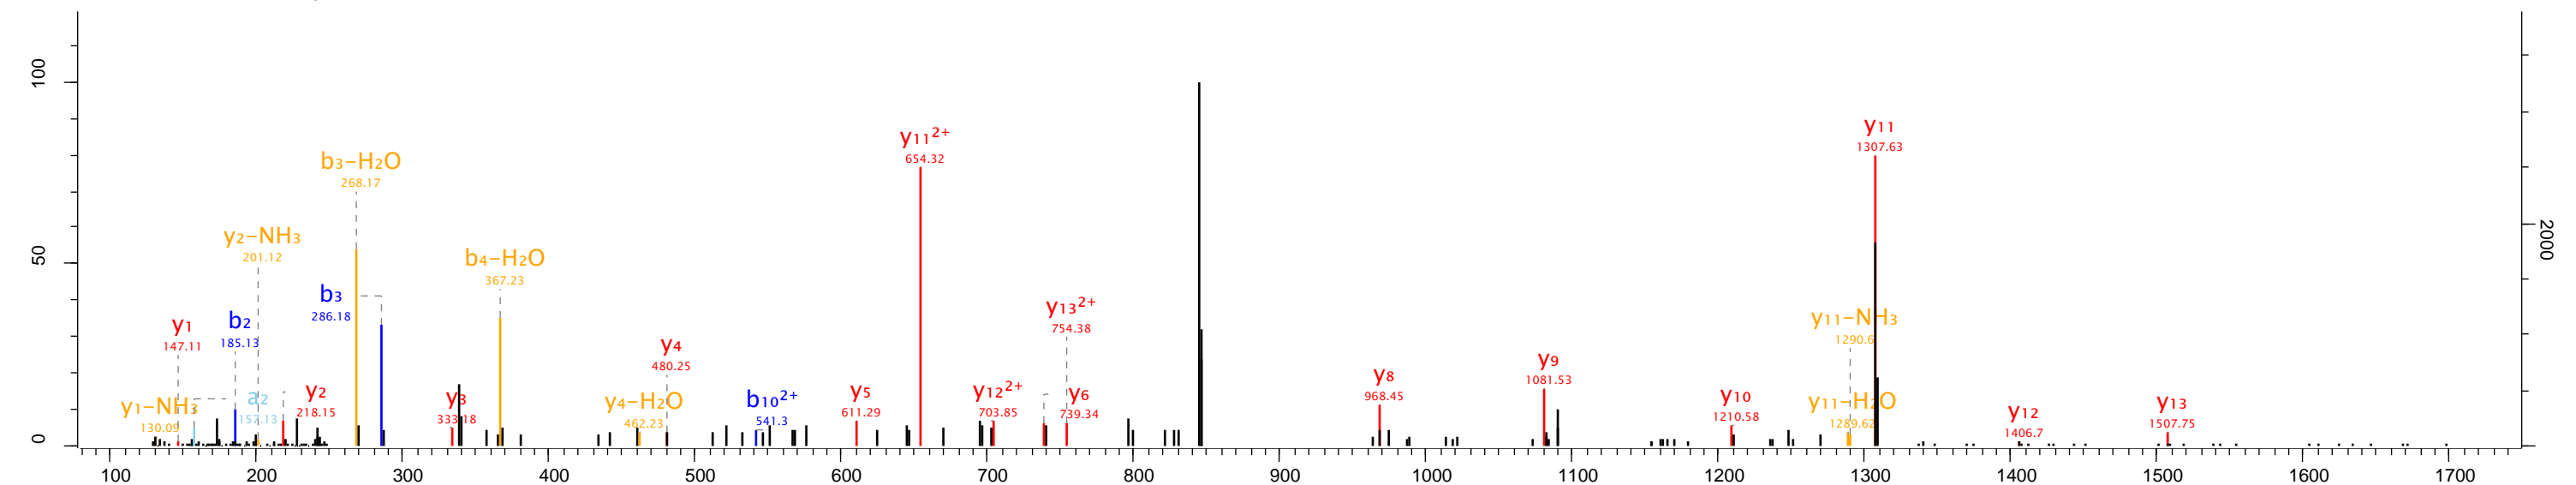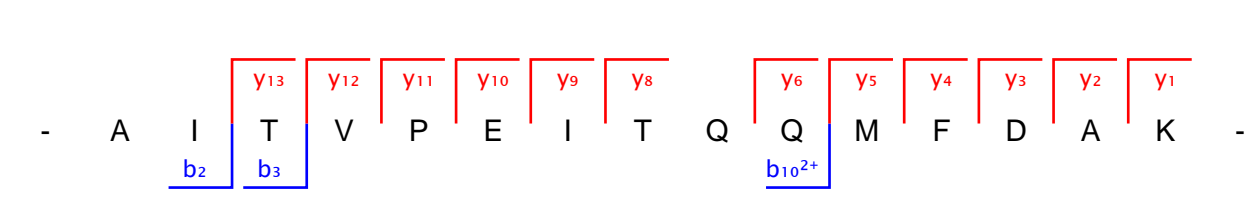

Spectral Annotation for Single-Peptide IDs in 16-cell Embryo using Q-OT-LIT

Raw file: 2015-01-05\_CL02\_2Excl15sMaxInj70  
 Scan: 18679 Method: ITMS; HCD Score: 56.29 m/z: 534.61

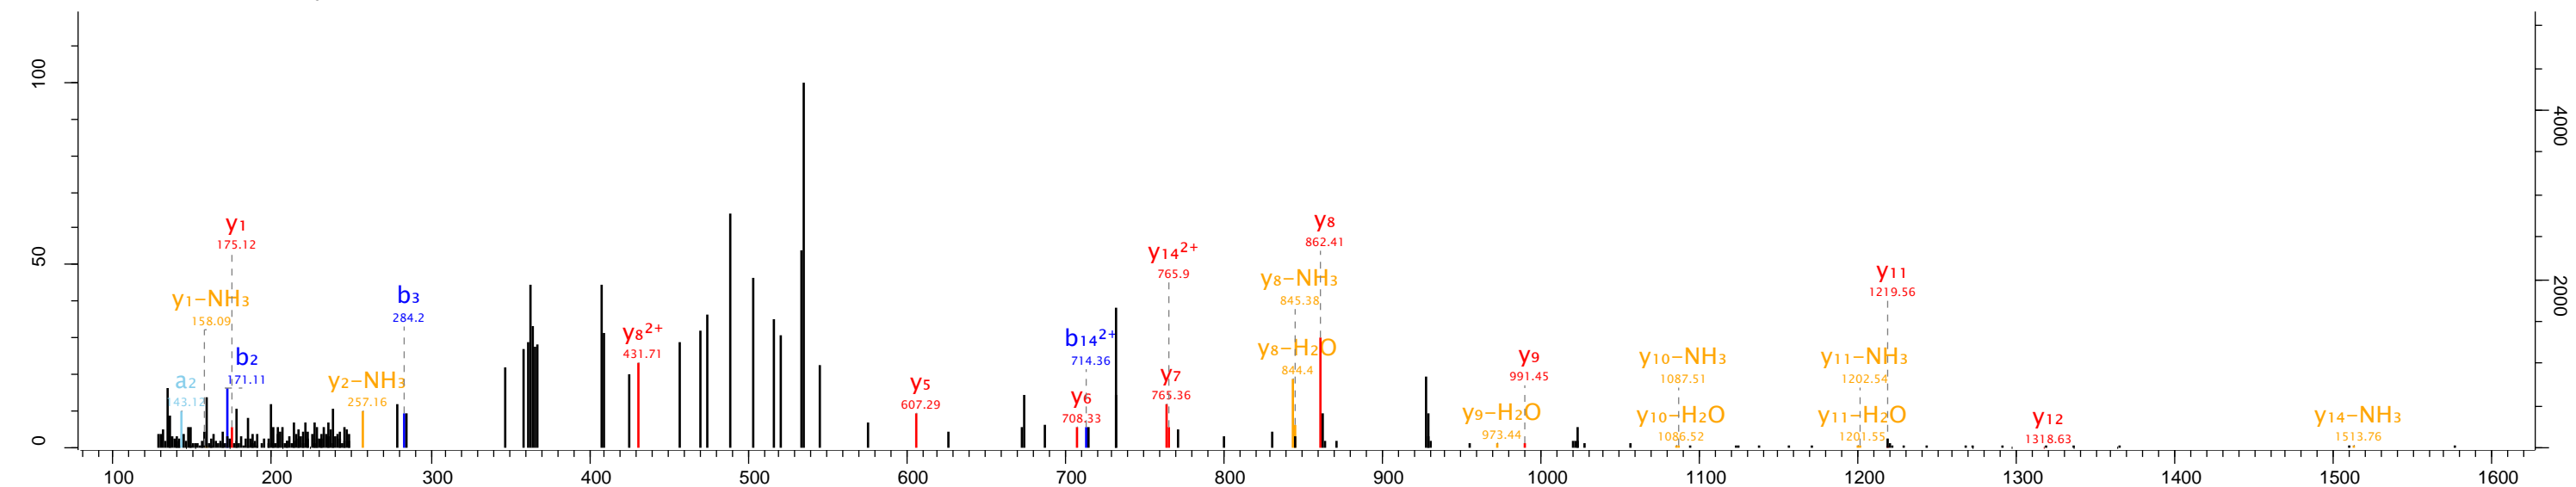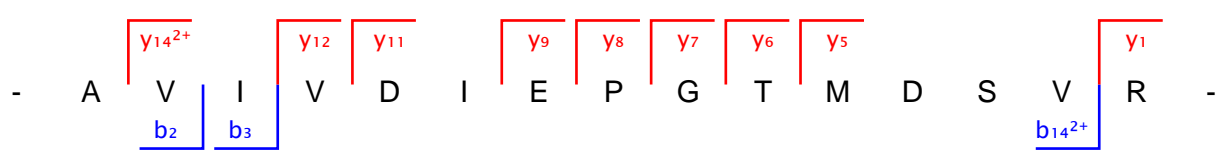

Raw file 2015-01-05\_CL02\_2Excl15sMaxInj70 Scan 18726 Method ITMS; HCD Score 85.01 m/z 801.41

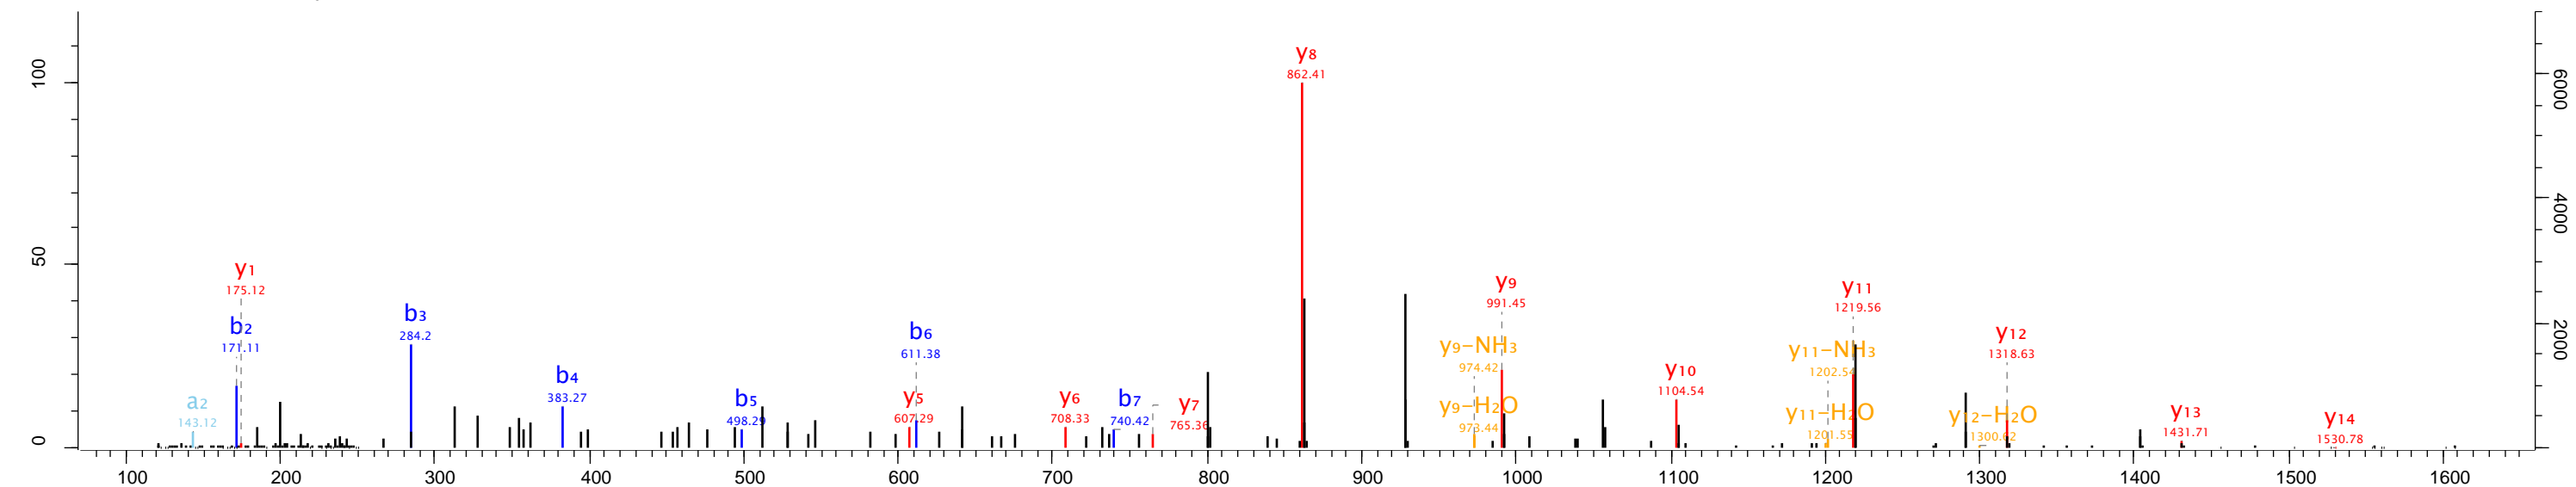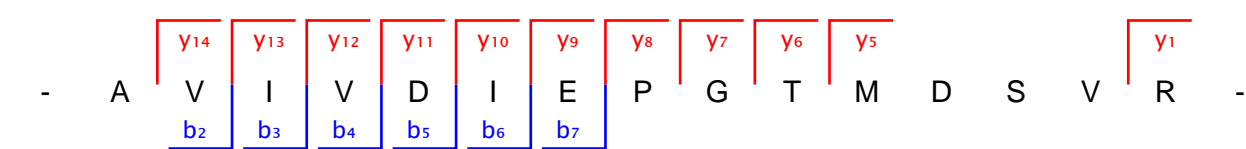

Raw file: 2015-01-05\_CL02\_2Excl15sMaxInj70  
 Scan: 19047  
 Method: ITMS; HCD  
 Score: 88.31  
 m/z: 837.95

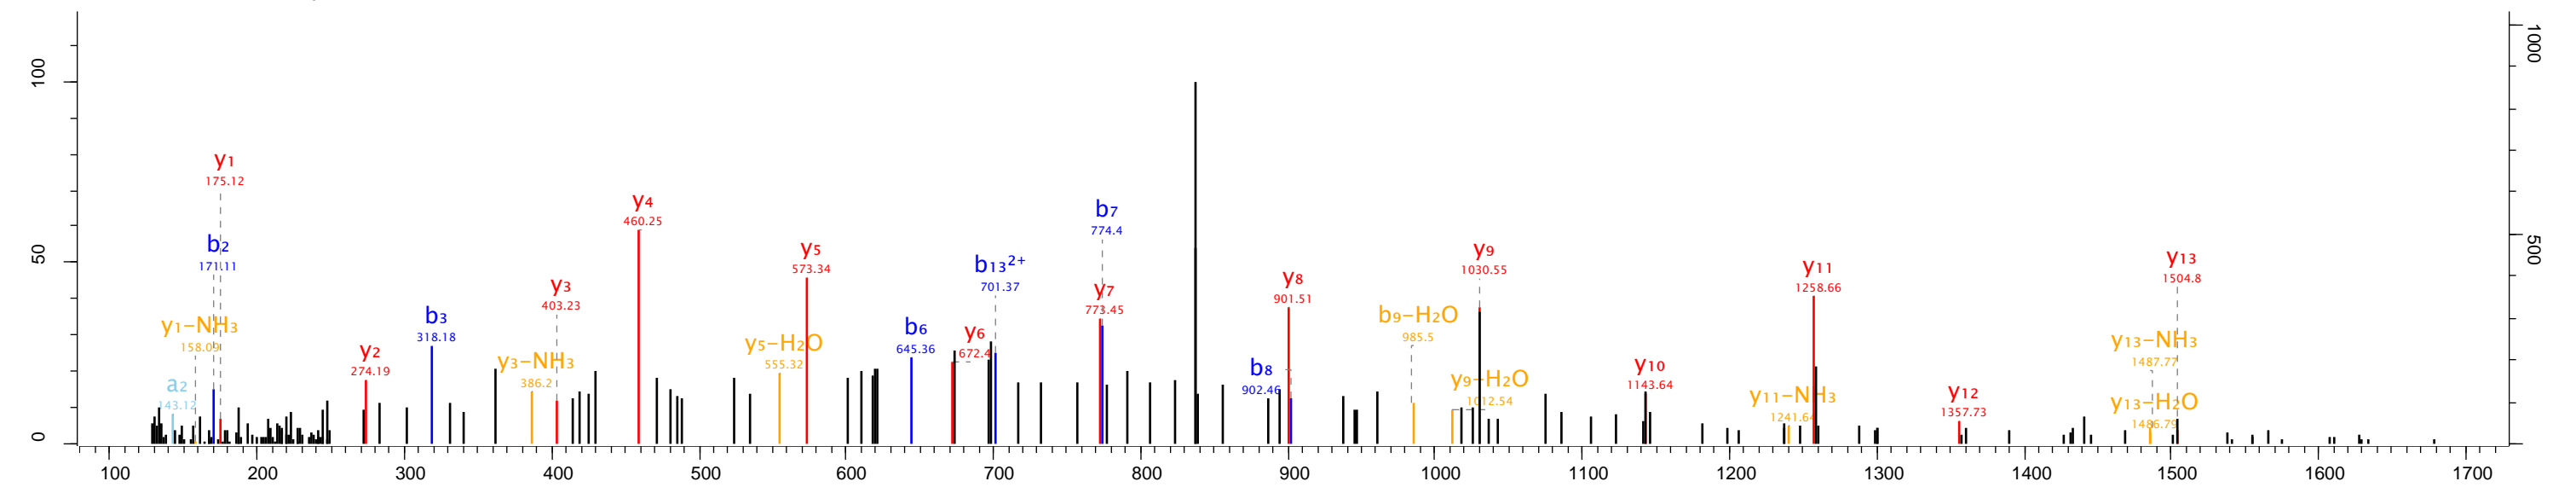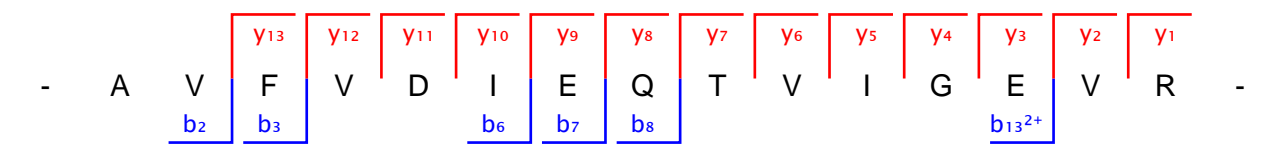

Raw file 2015-01-05\_CL02\_2Excl15sMaxInj70 Scan 19049 Method ITMS; HCD Score 101.2 m/z 563.64

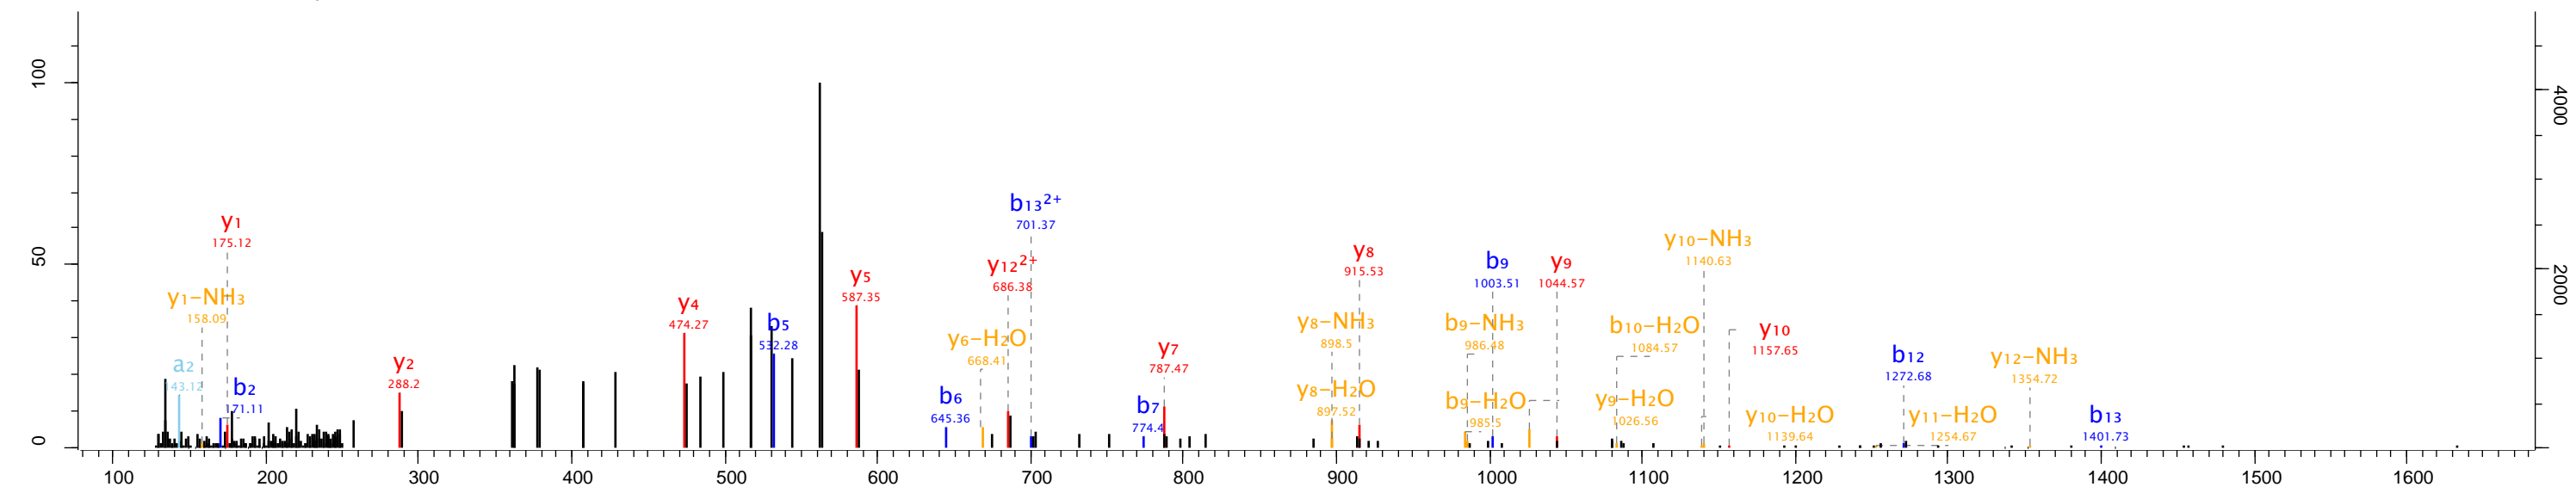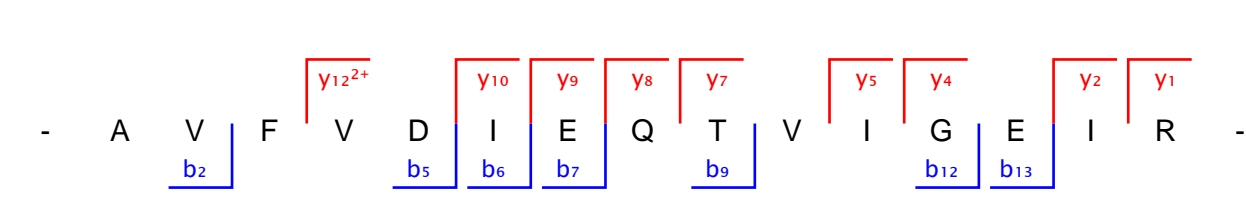

Raw file: 2015-01-05\_CL02\_2Excl15sMaxInj70  
 Scan: 19070 Method: ITMS; HCD Score: 103.88 m/z: 838.45

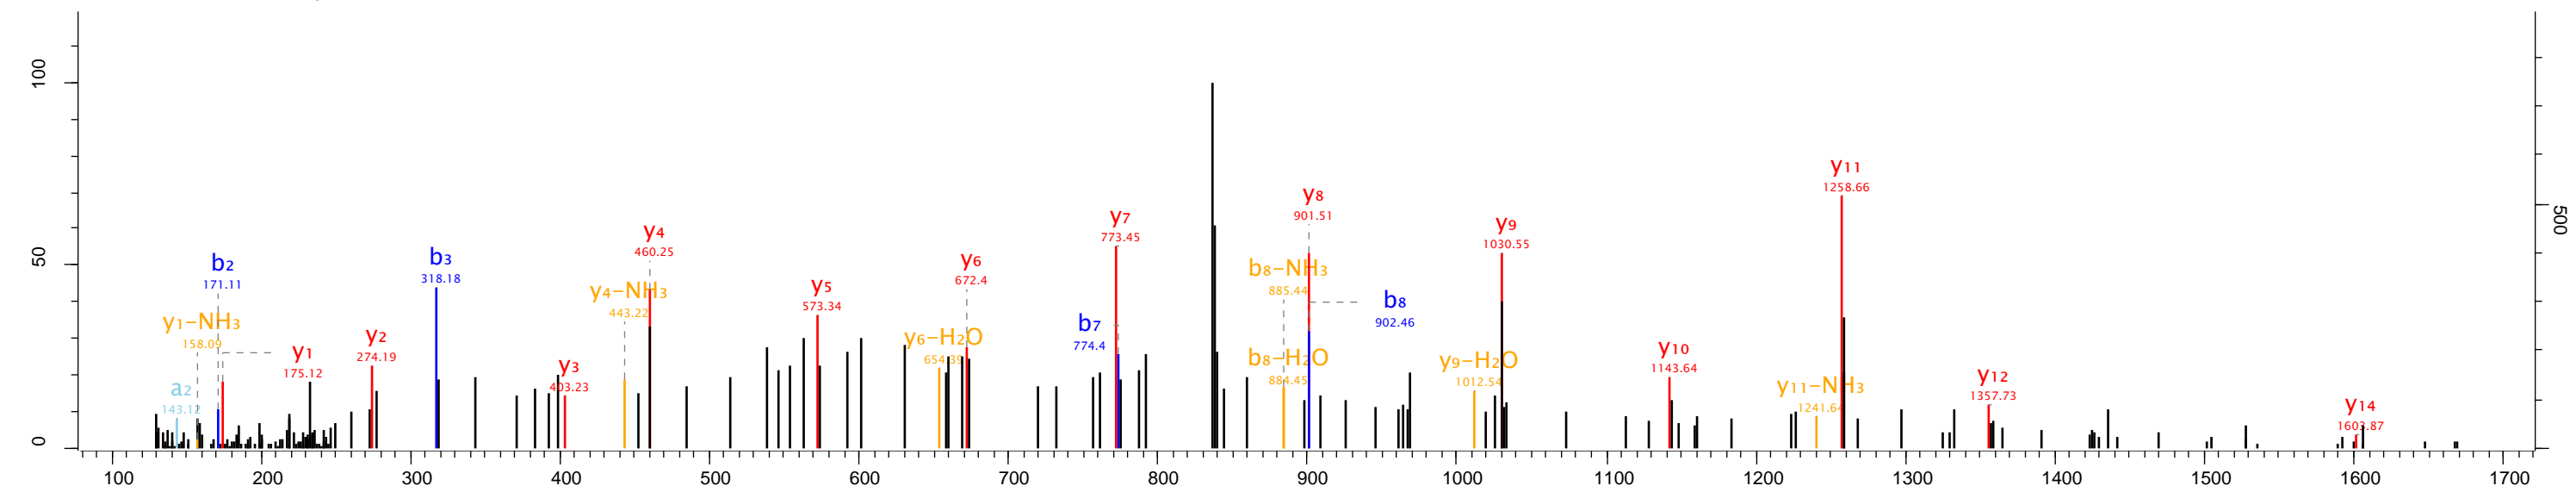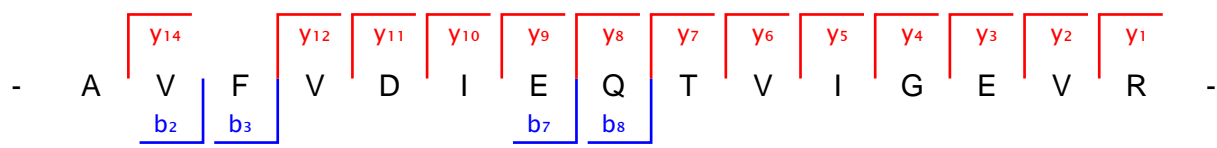

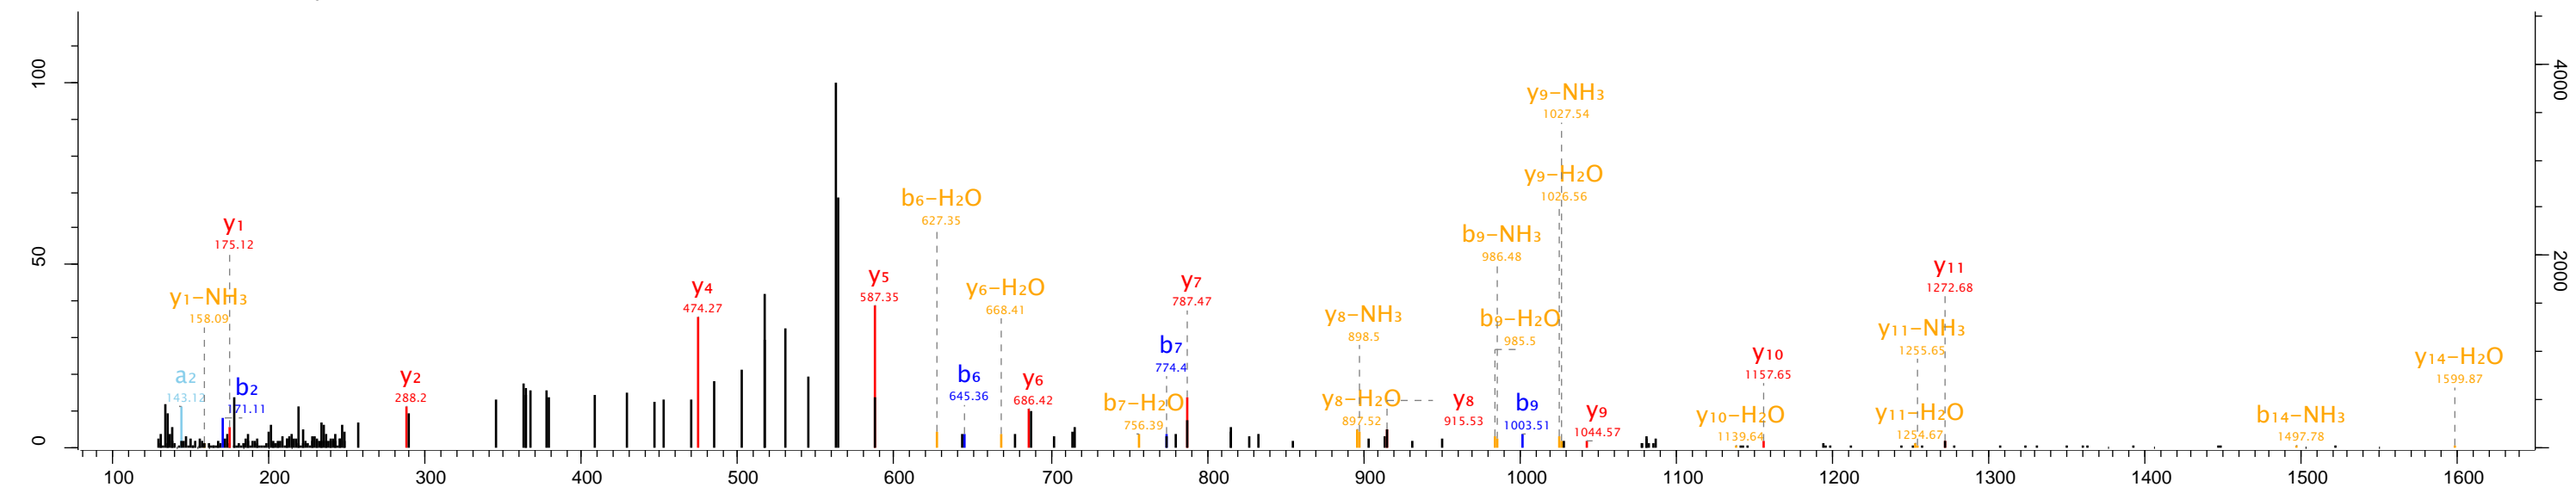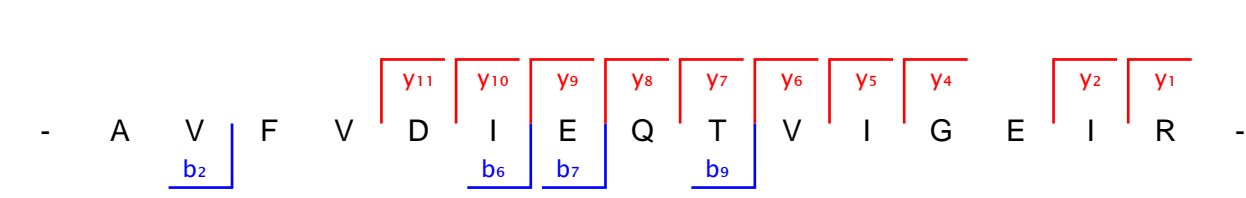

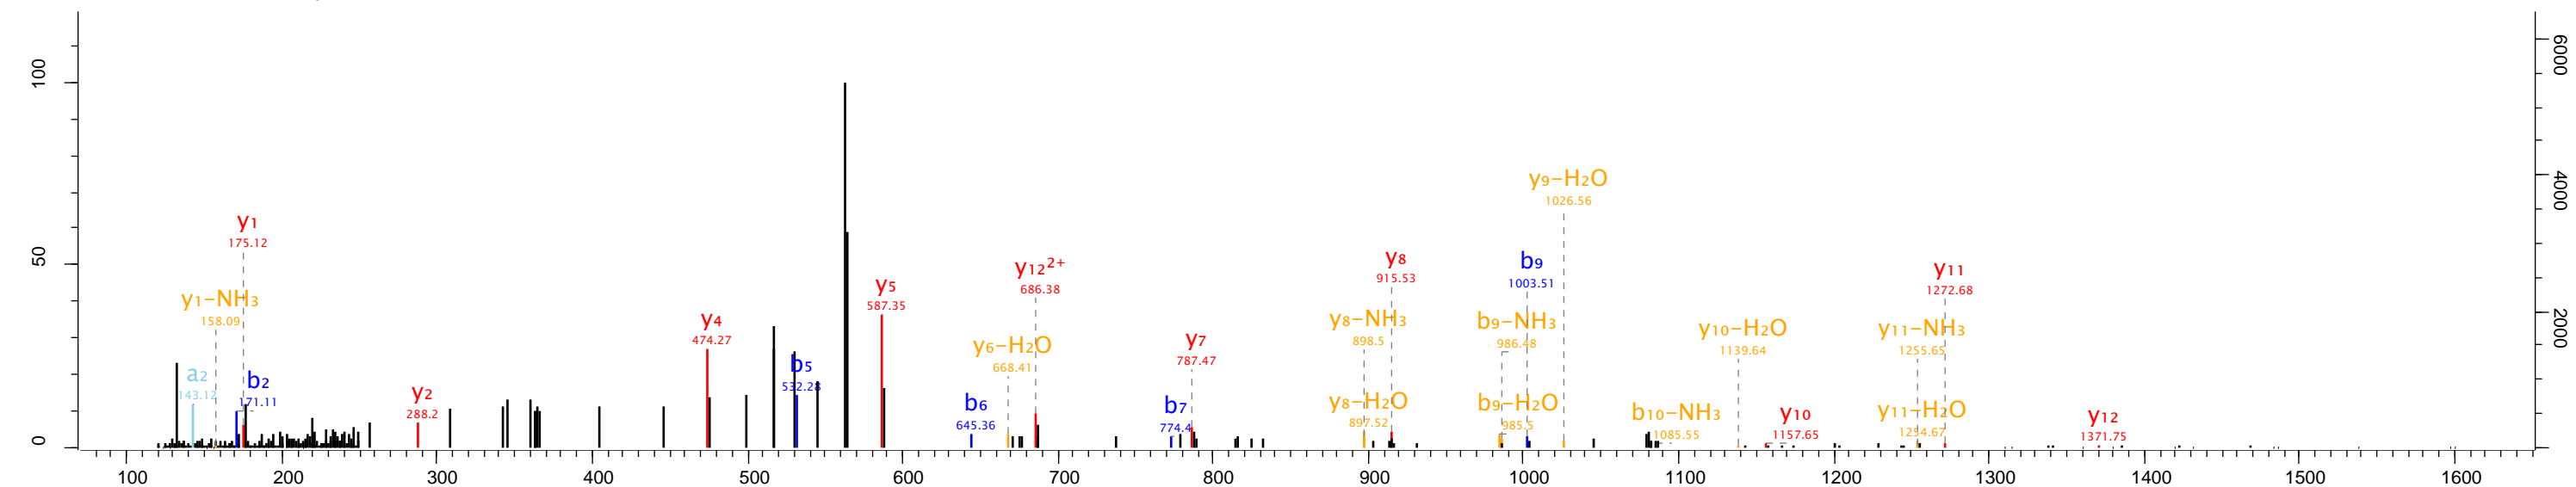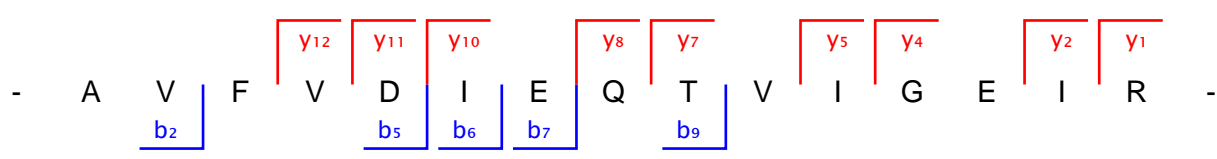



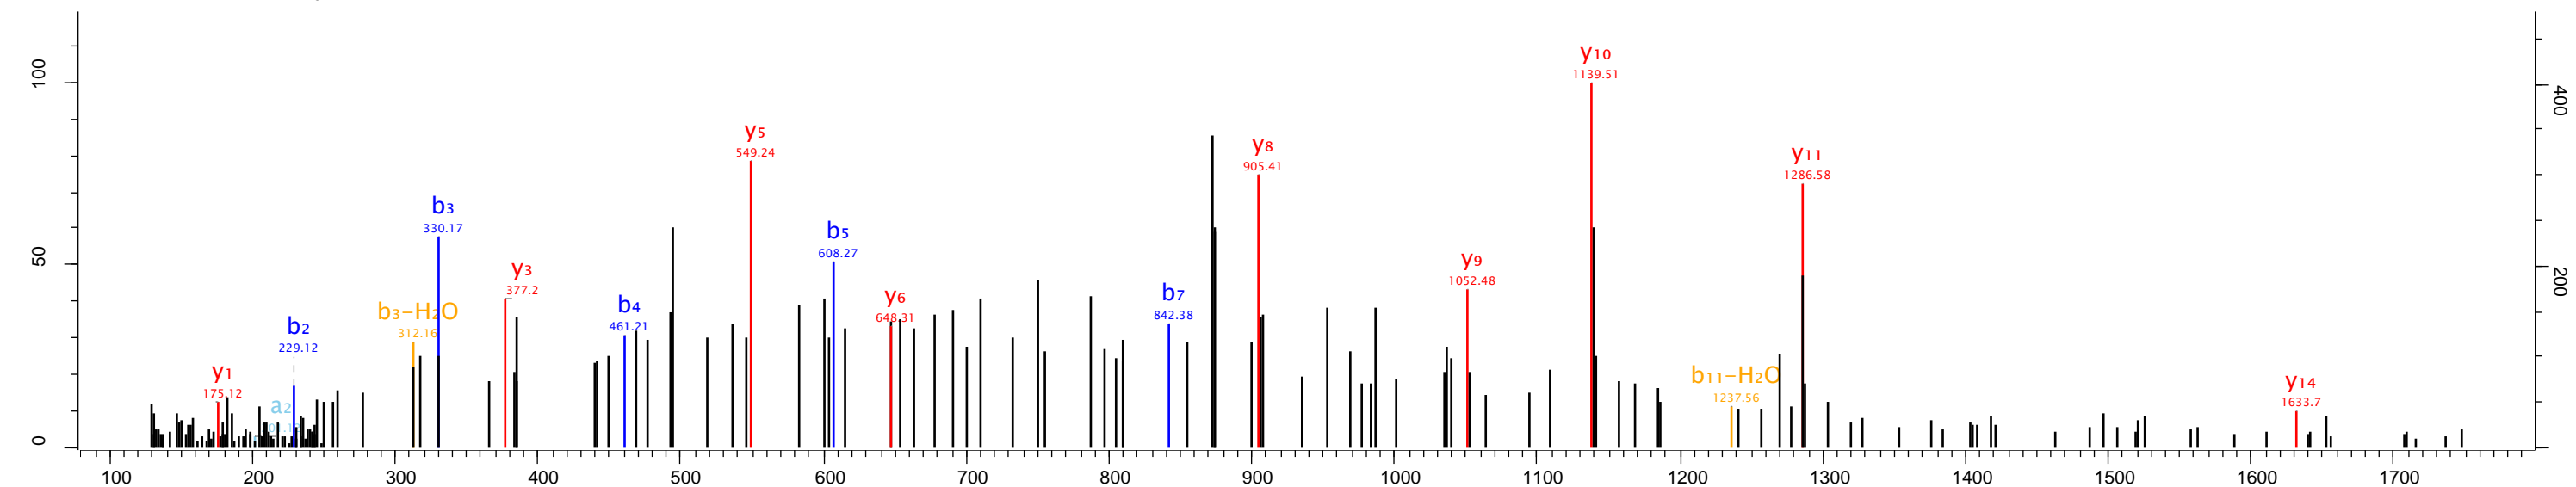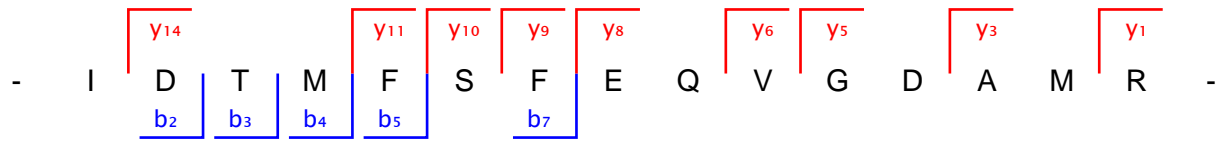

Raw file: 2015-01-05\_CL02\_2Excl15sMaxInj70  
 Scan: 19238 Method: ITMS; HCD Score: 51.5 m/z: 875.97

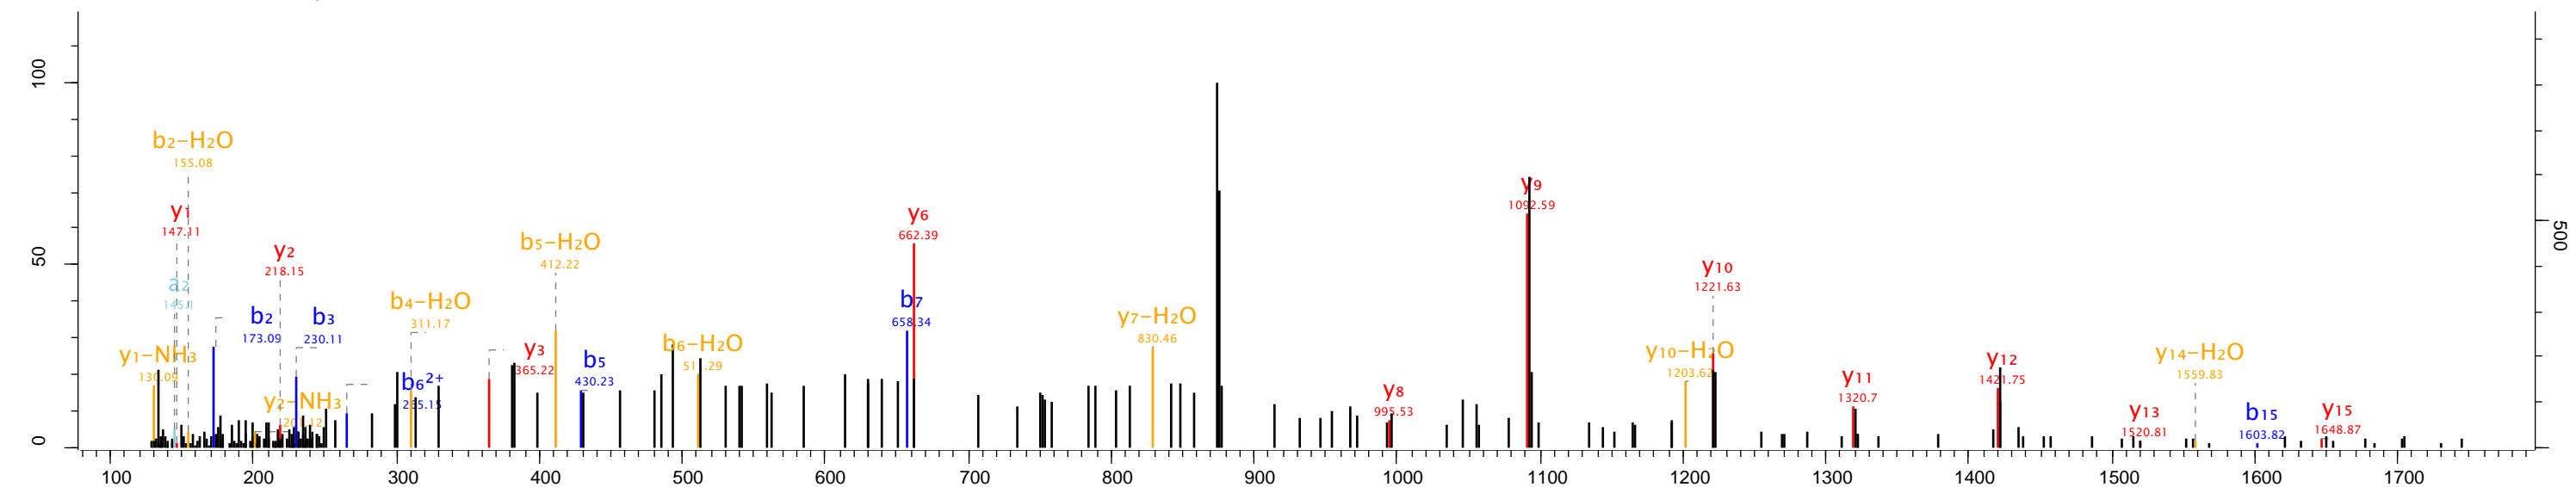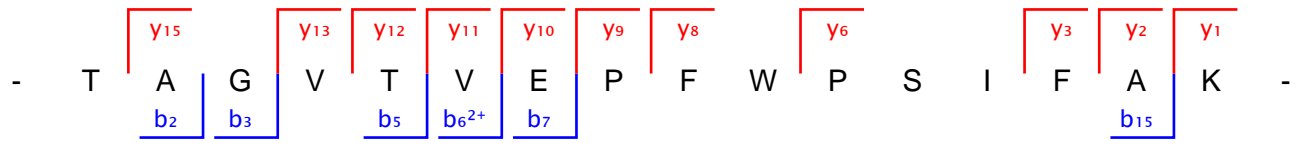

Spectral Annotation for Single-Peptide IDs in 16-cell Embryo using Q-OT-LIT

Raw file: 2015-01-05\_CL02\_2Excl15sMaxInj70  
 Scan: 19246 Method: ITMS; HCD Score: 111.72 m/z: 1192.95

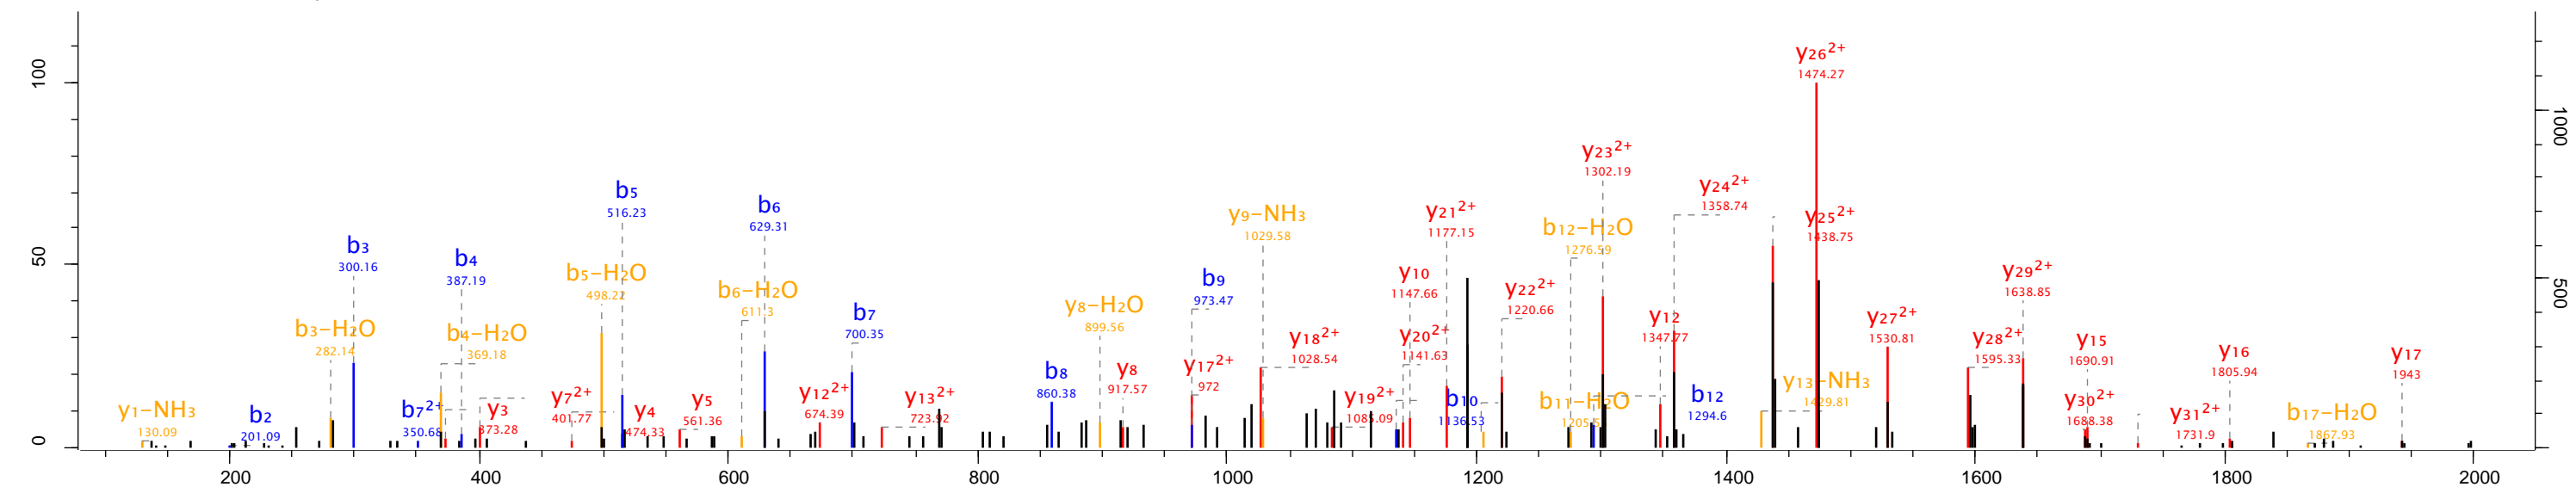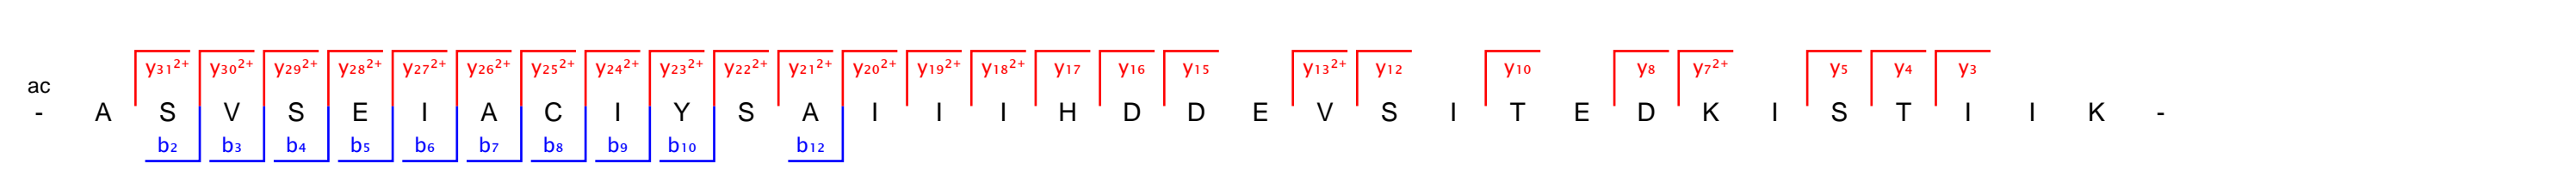

Spectral Annotation for Single-Peptide IDs in 16-cell Embryo using Q-OT-LIT

Raw file: 2015-01-05\_CL02\_2Excl15sMaxInj70  
 Scan: 19251  
 Method: ITMS; HCD  
 Score: 62.56  
 m/z: 854.39

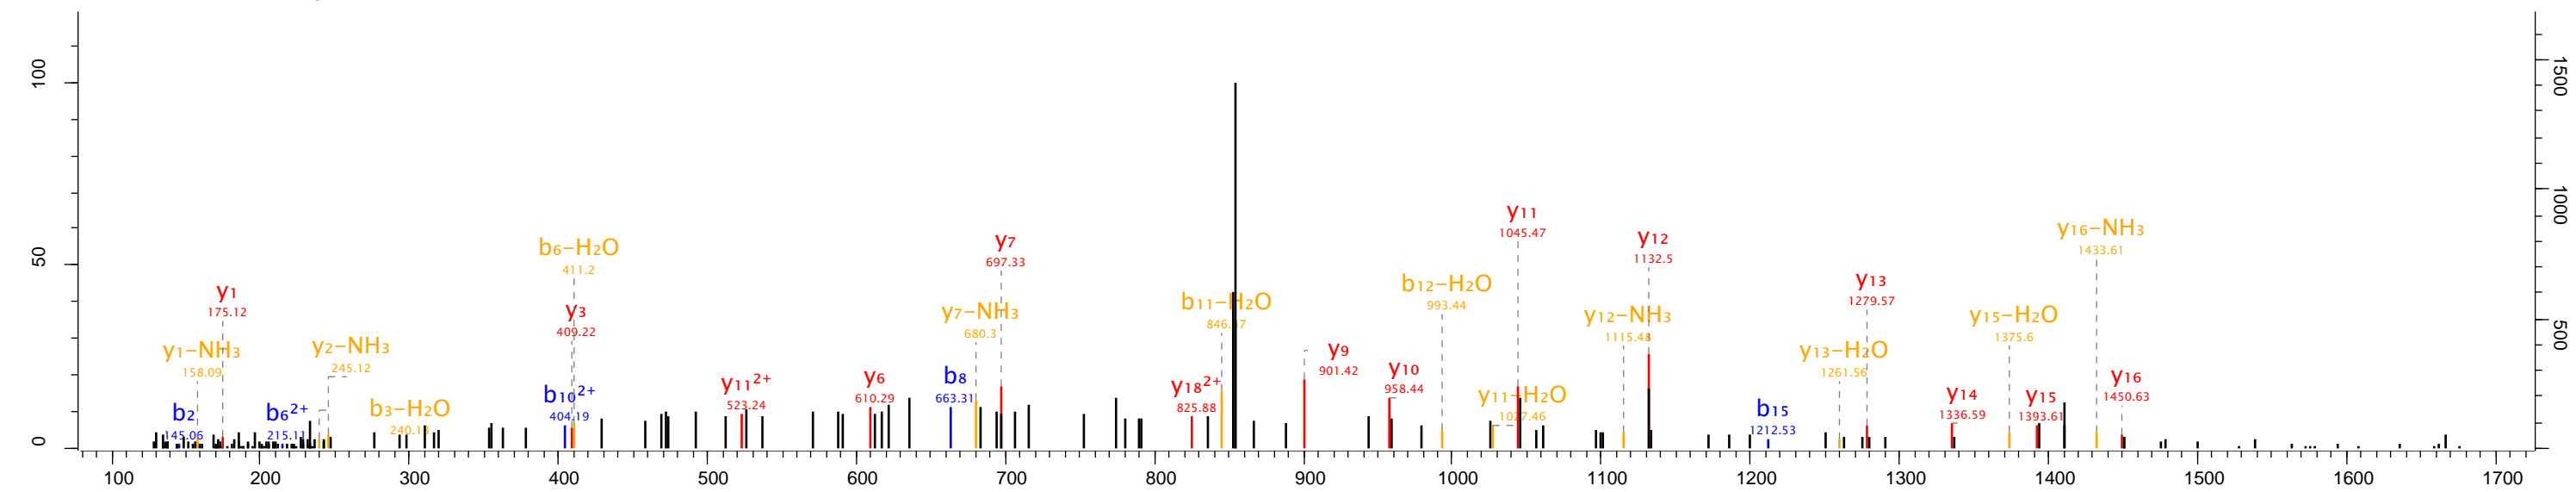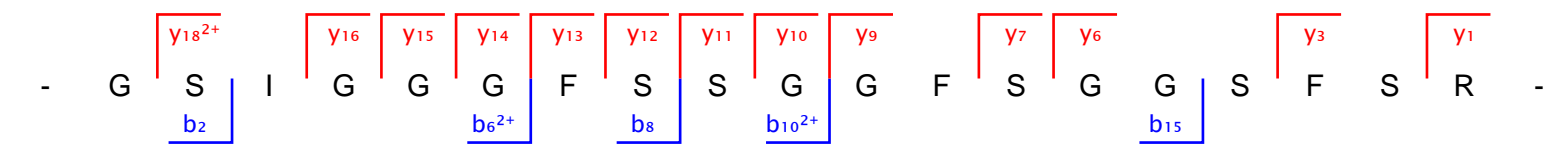

Raw file Scan Method Score m/z  
 2015-01-05\_CL02\_2Excl15sMaxInj70 19253 ITMS; HCD 92.46 1192.95

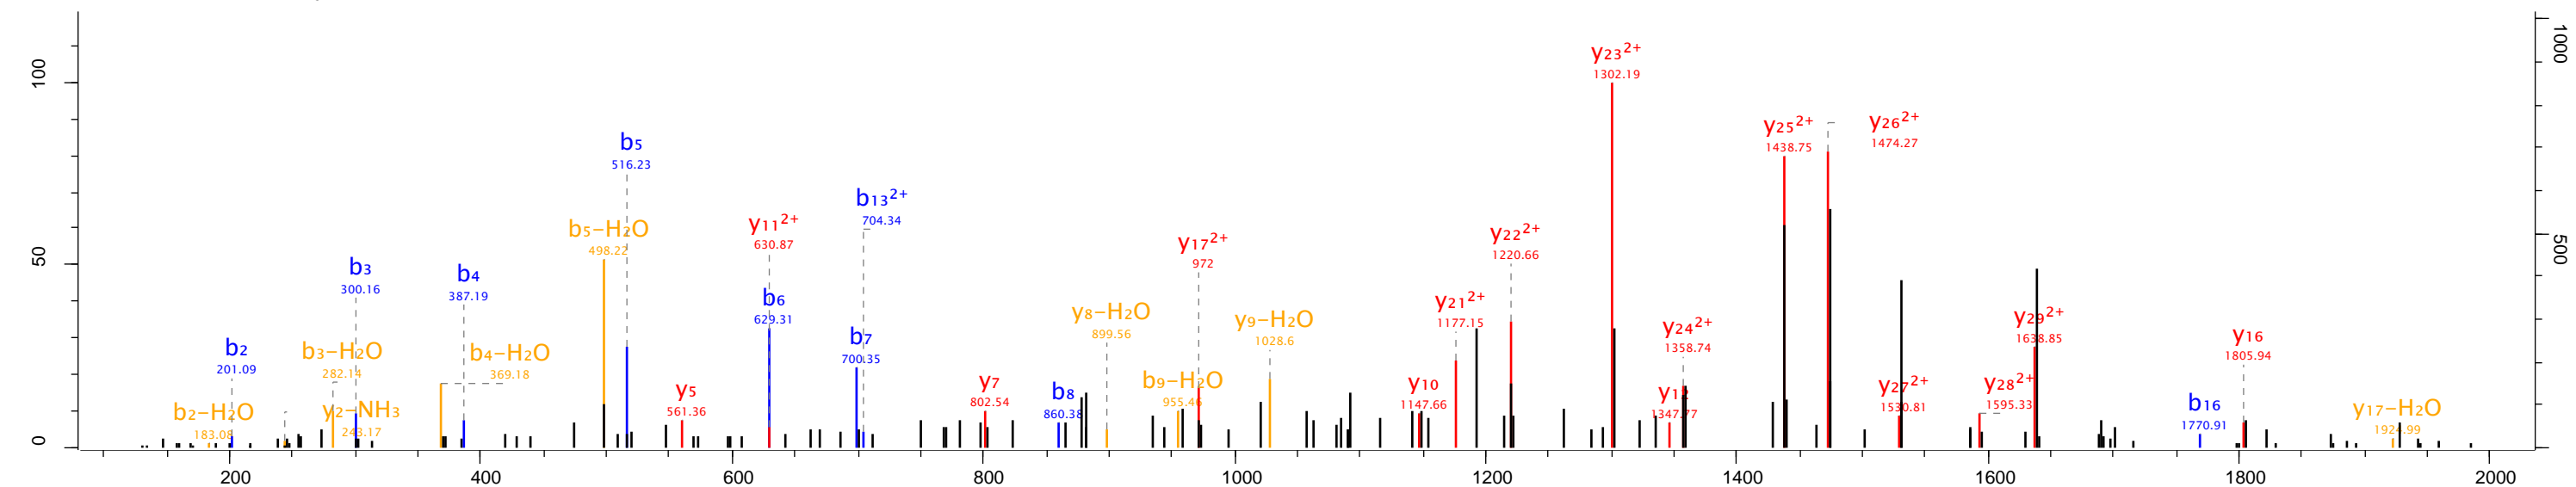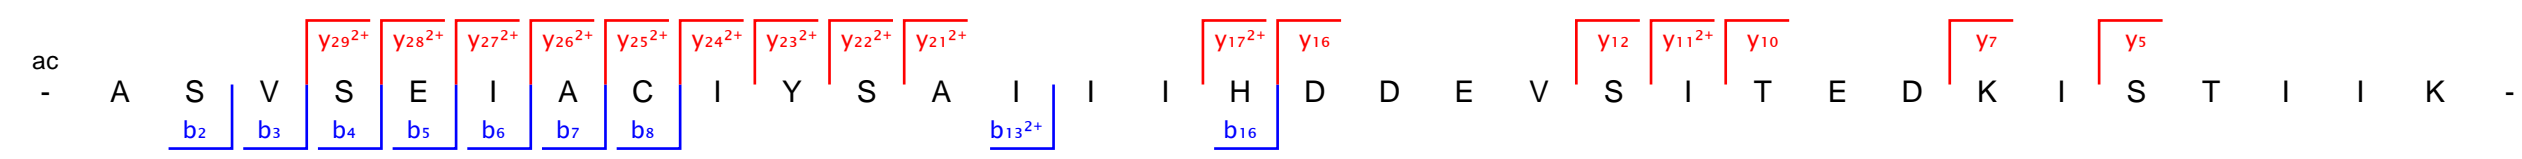

Raw file 2015-01-05\_CL02\_2Excl15sMaxInj70 Scan 19254 Method ITMS; HCD Score 110.97 m/z 875.46

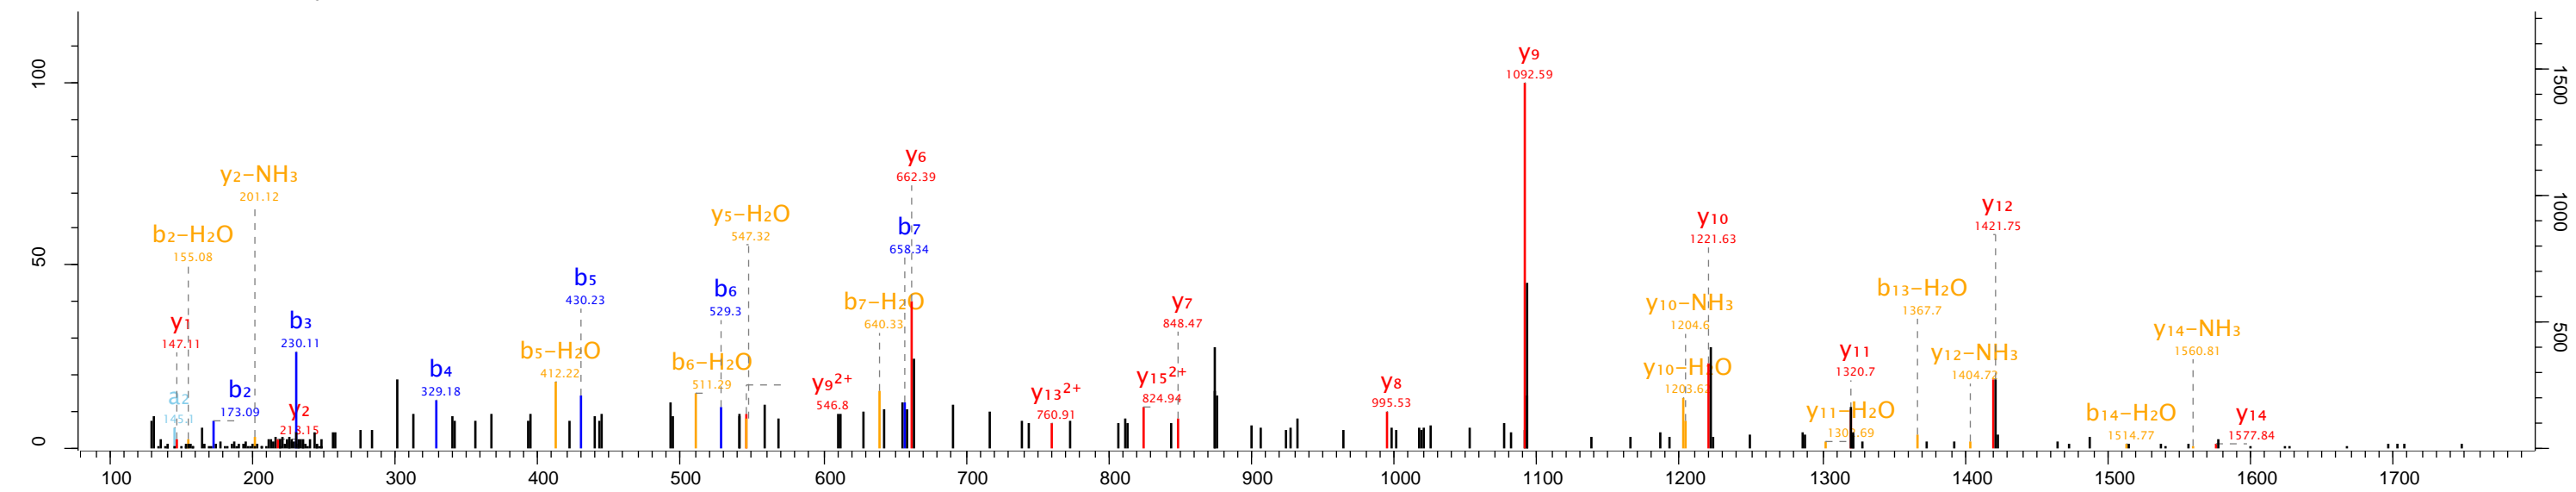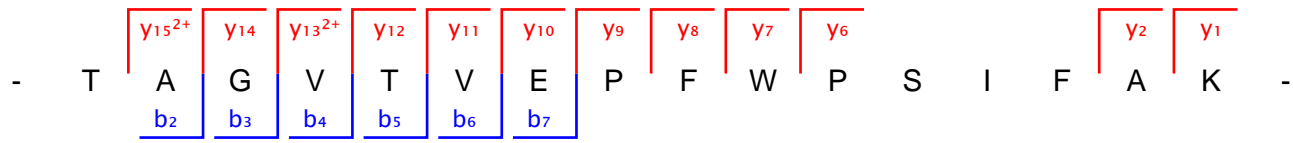

Spectral Annotation for Single-Peptide IDs in 16-cell Embryo using Q-OT-LIT

Raw file: 2015-01-05\_CL02\_2Excl15sMaxInj70  
 Scan: 19262 Method: ITMS; HCD Score: 62.62 m/z: 854.89

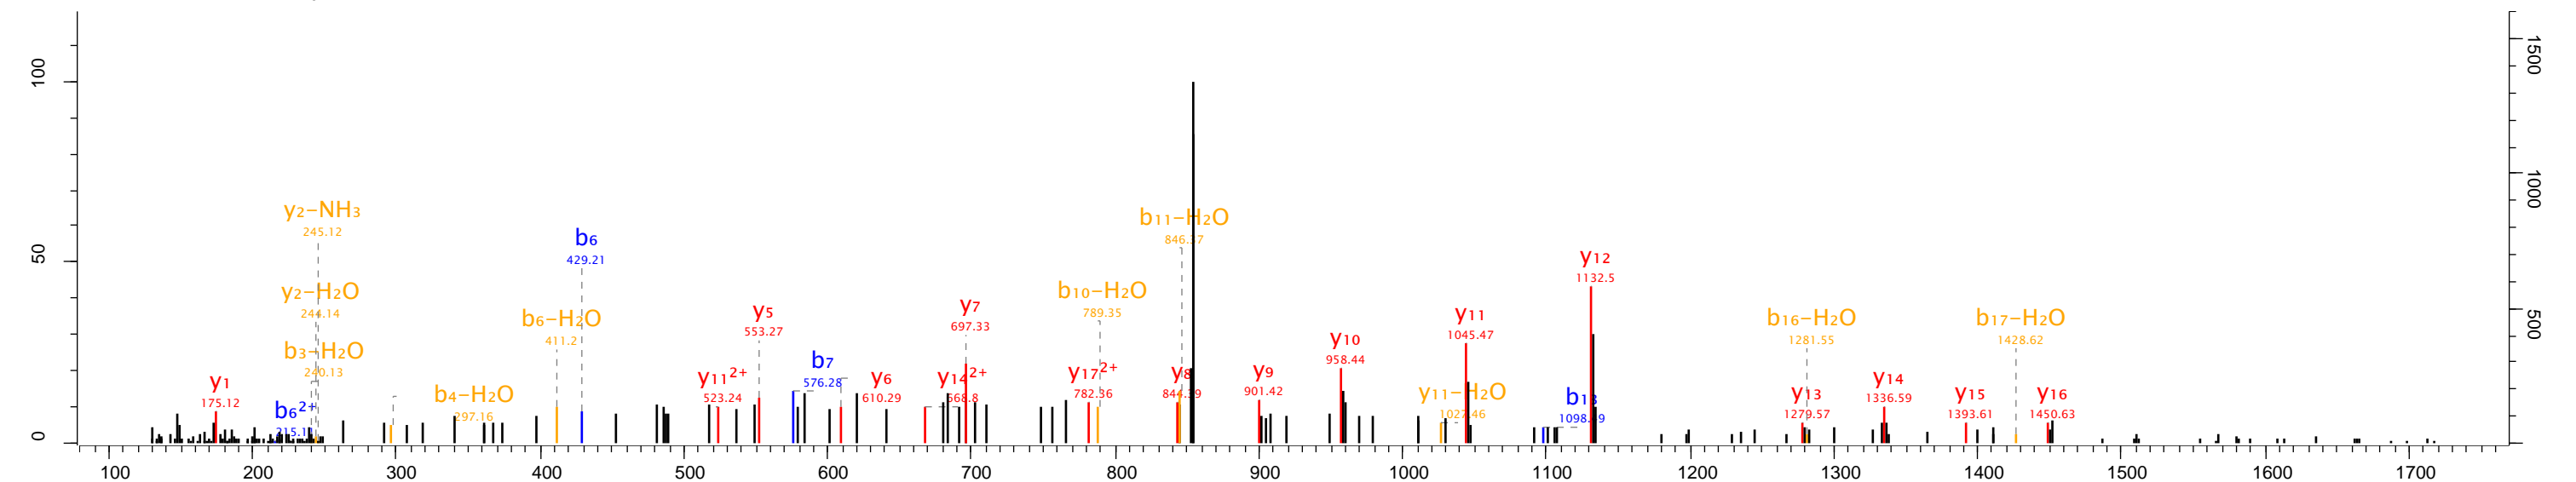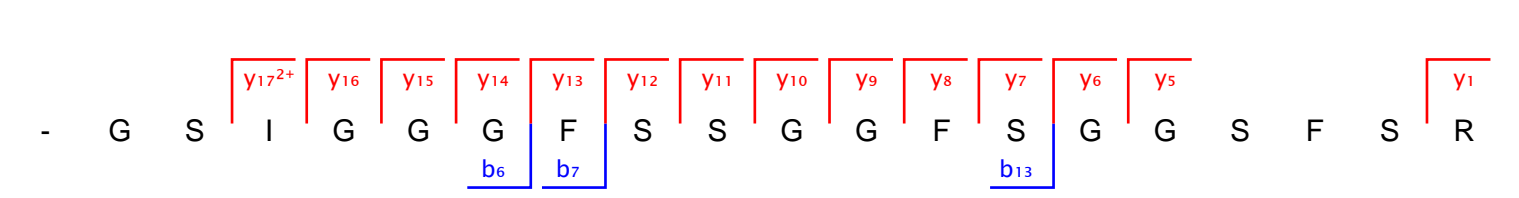

Spectral Annotation for Single-Peptide IDs in 16-cell Embryo using Q-OT-LIT

Raw file 2015-01-05\_CL02\_2Excl15sMaxInj70 Scan 19274 Method ITMS; HCD Score 75.02 m/z 1193.28

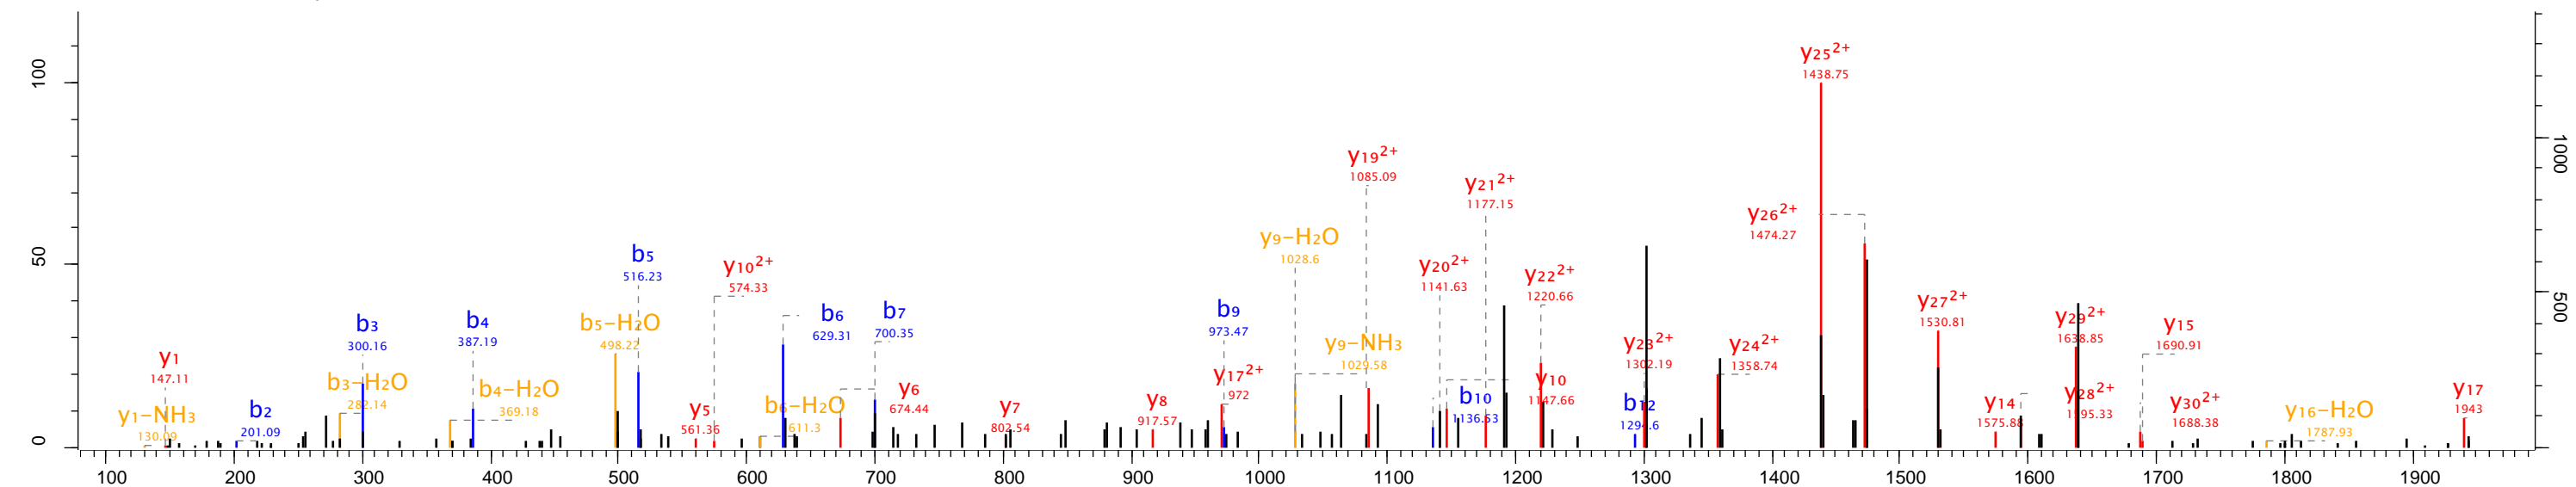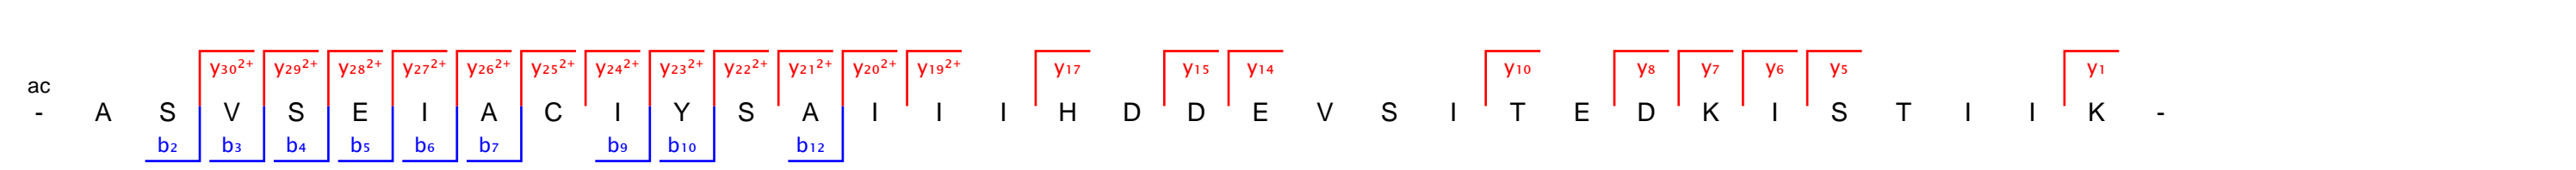



Raw file  
 2015-01-05\_CL02\_2Excl15sMaxInj70  
 Scan 19280 Method ITMS; HCD Score 62.24 m/z 842.95

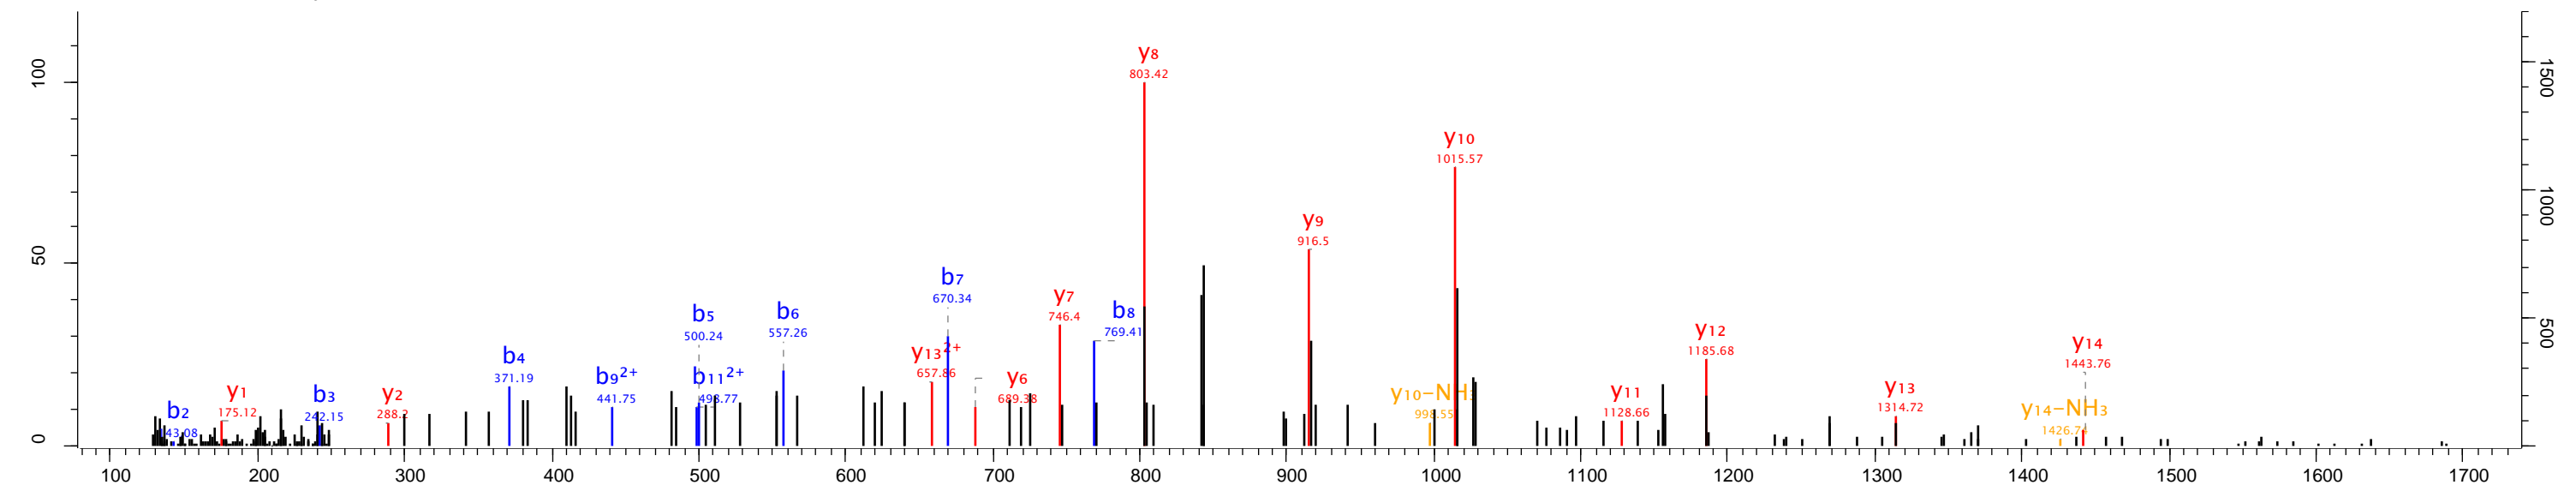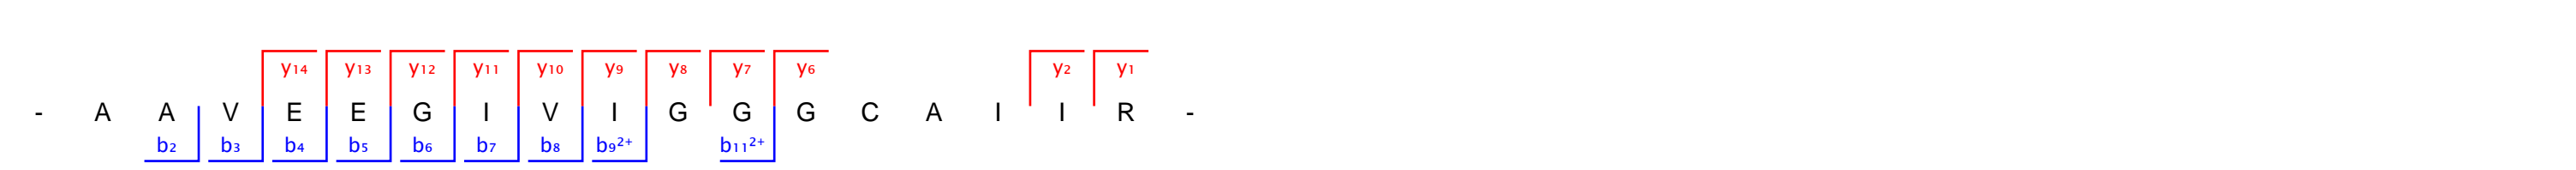

Spectral Annotation for Single-Peptide IDs in 16-cell Embryo using Q-OT-LIT

Raw file 2015-01-05\_CL02\_2Excl15sMaxInj70 Scan 19288 Method ITMS; HCD Score 85.16 m/z 1193.28

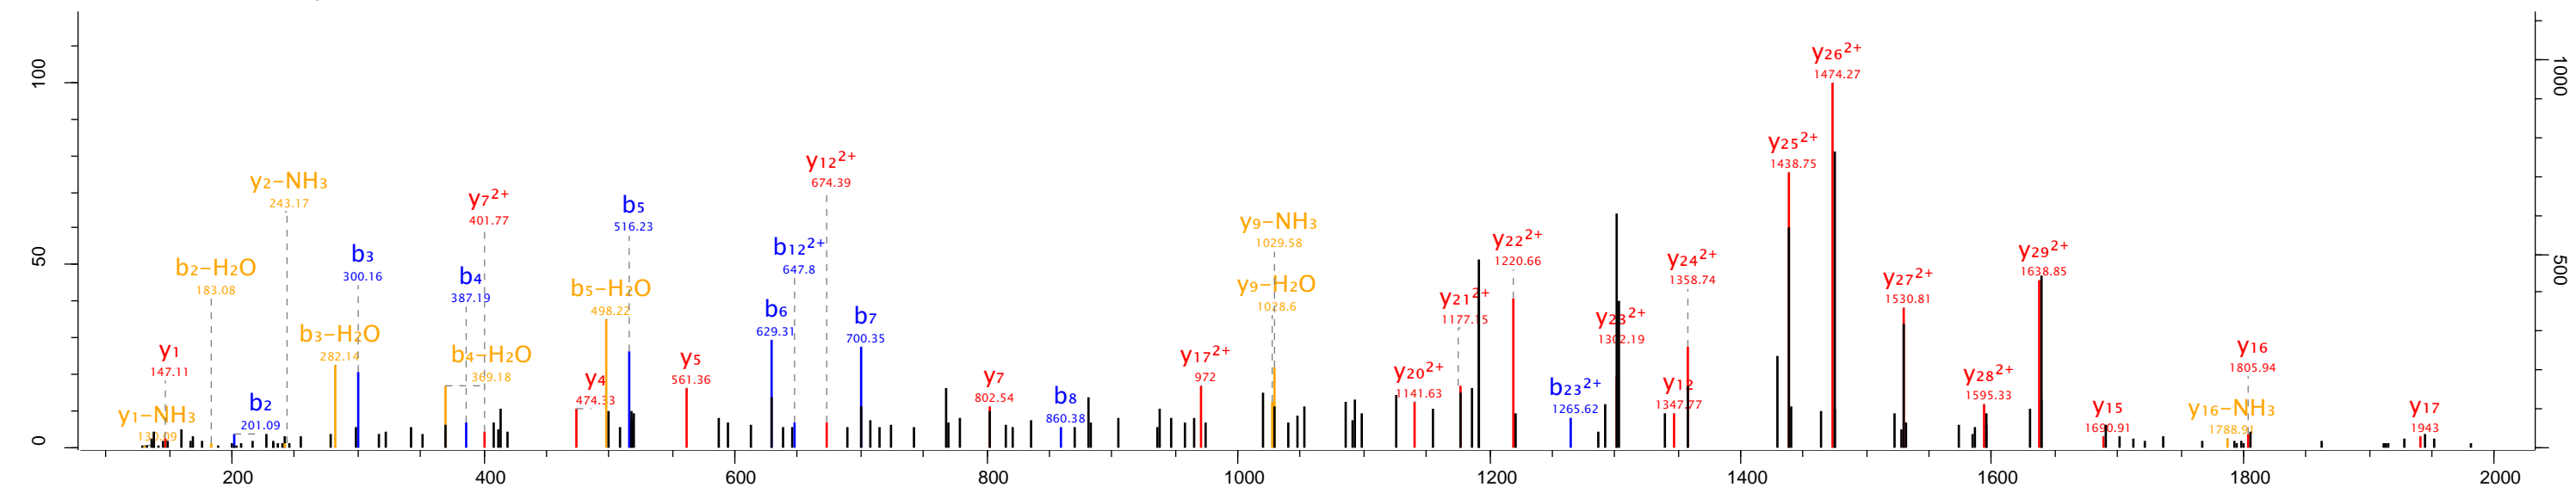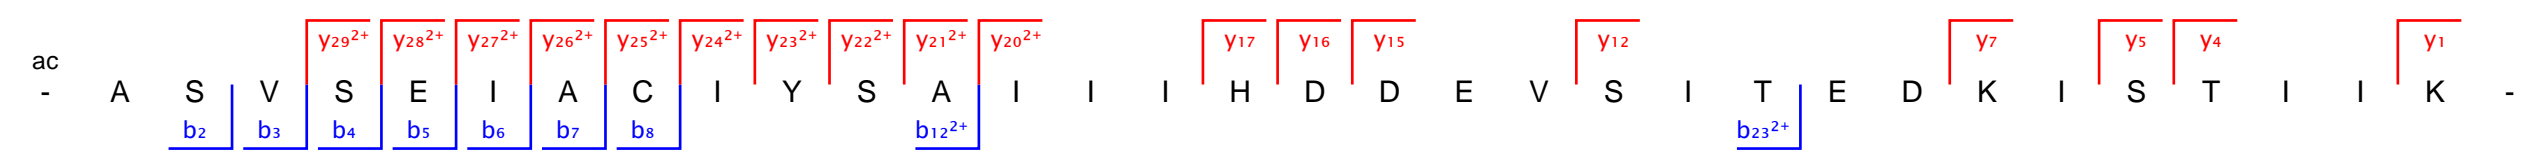

Spectral Annotation for Single-Peptide IDs in 16-cell Embryo using Q-OT-LIT

Raw file 2015-01-05\_CL02\_2Excl15sMaxInj70 Scan 19298 Method ITMS; HCD Score 88.71 m/z 1193.28

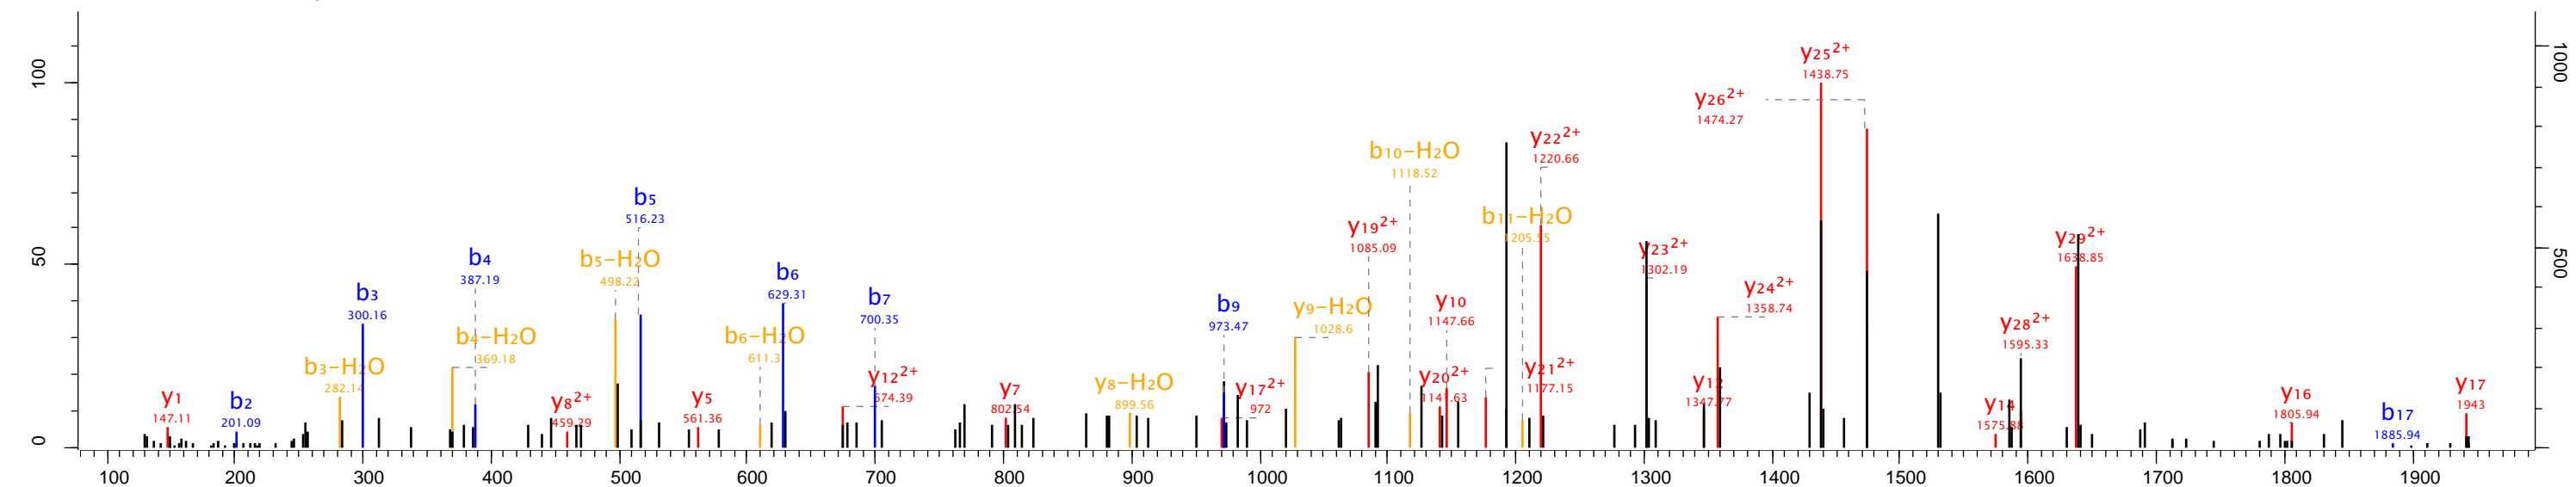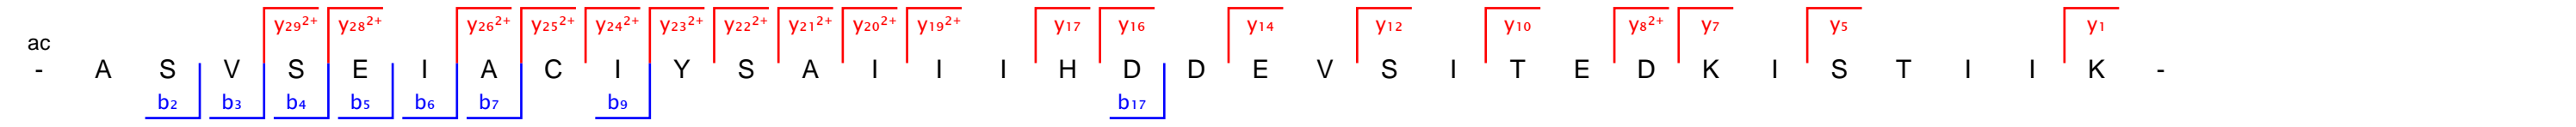

Raw file 2015-01-05\_CL02\_2Excl15sMaxInj70 Scan 19359 Method ITMS; HCD Score 75.04 m/z 1192.95

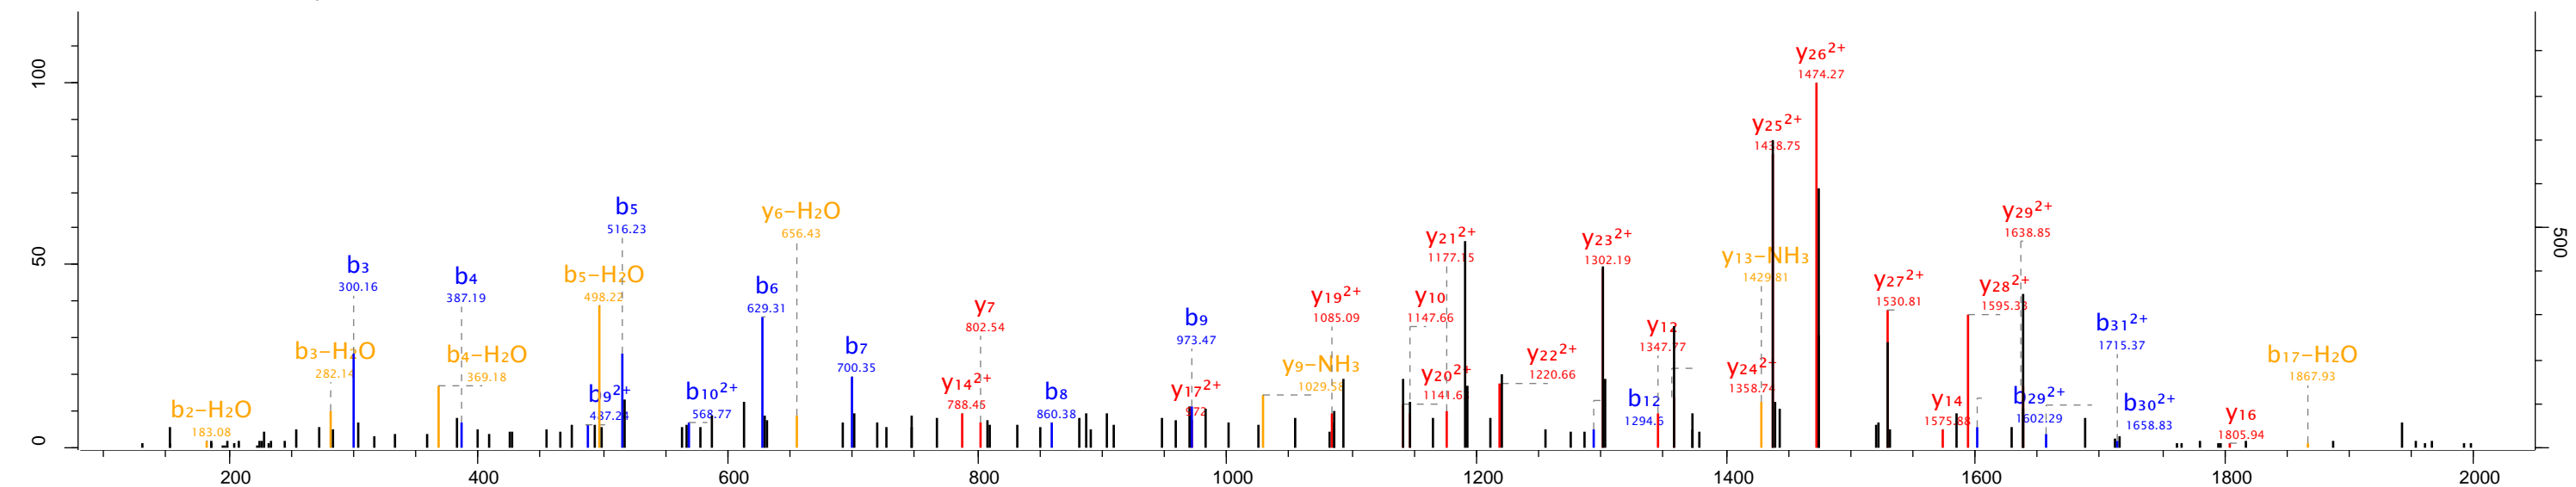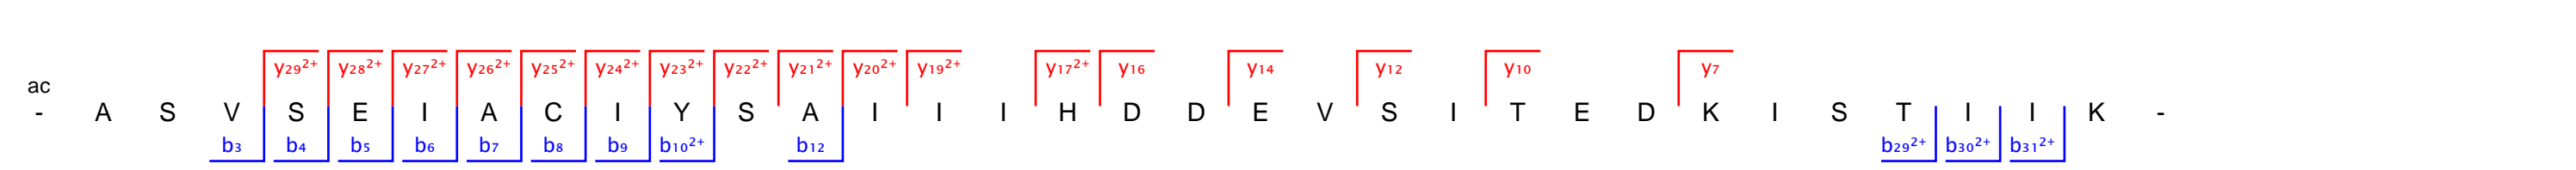

Raw file 2015-01-05\_CL02\_2Excl15sMaxInj70 Scan 19385 Method ITMS; HCD Score 75.72 m/z 1193.28

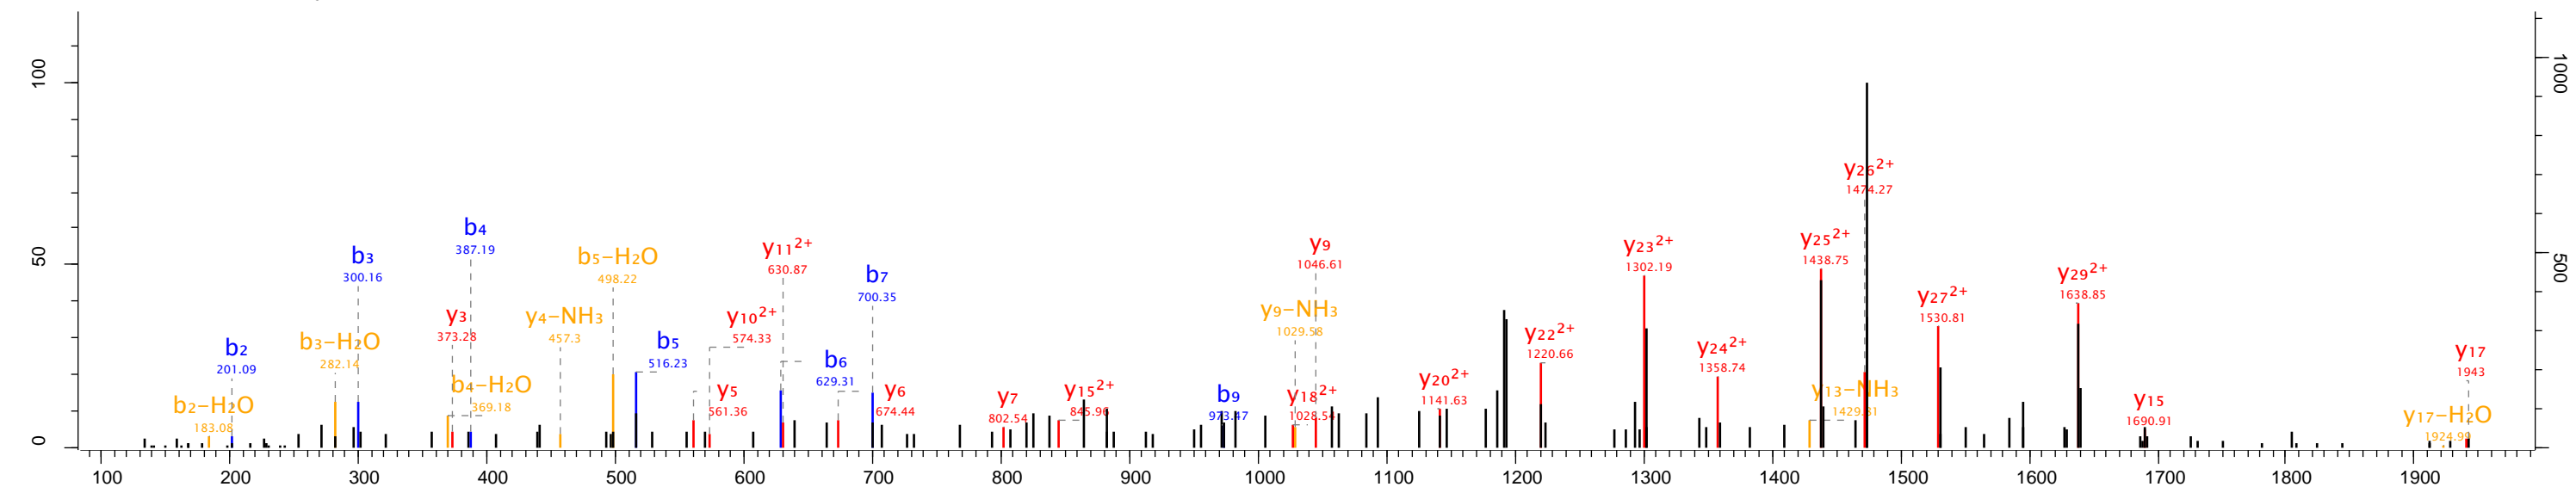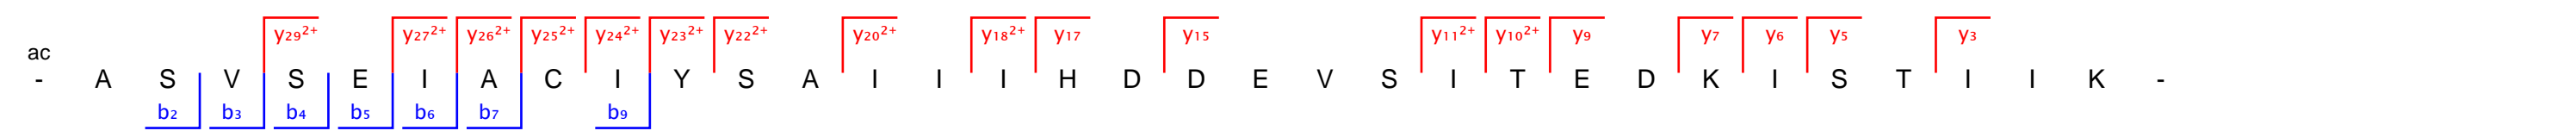

Raw file 2015-01-05\_CL02\_2Excl15sMaxInj70 Scan 19387 Method ITMS; HCD Score 53.68 m/z 894.96

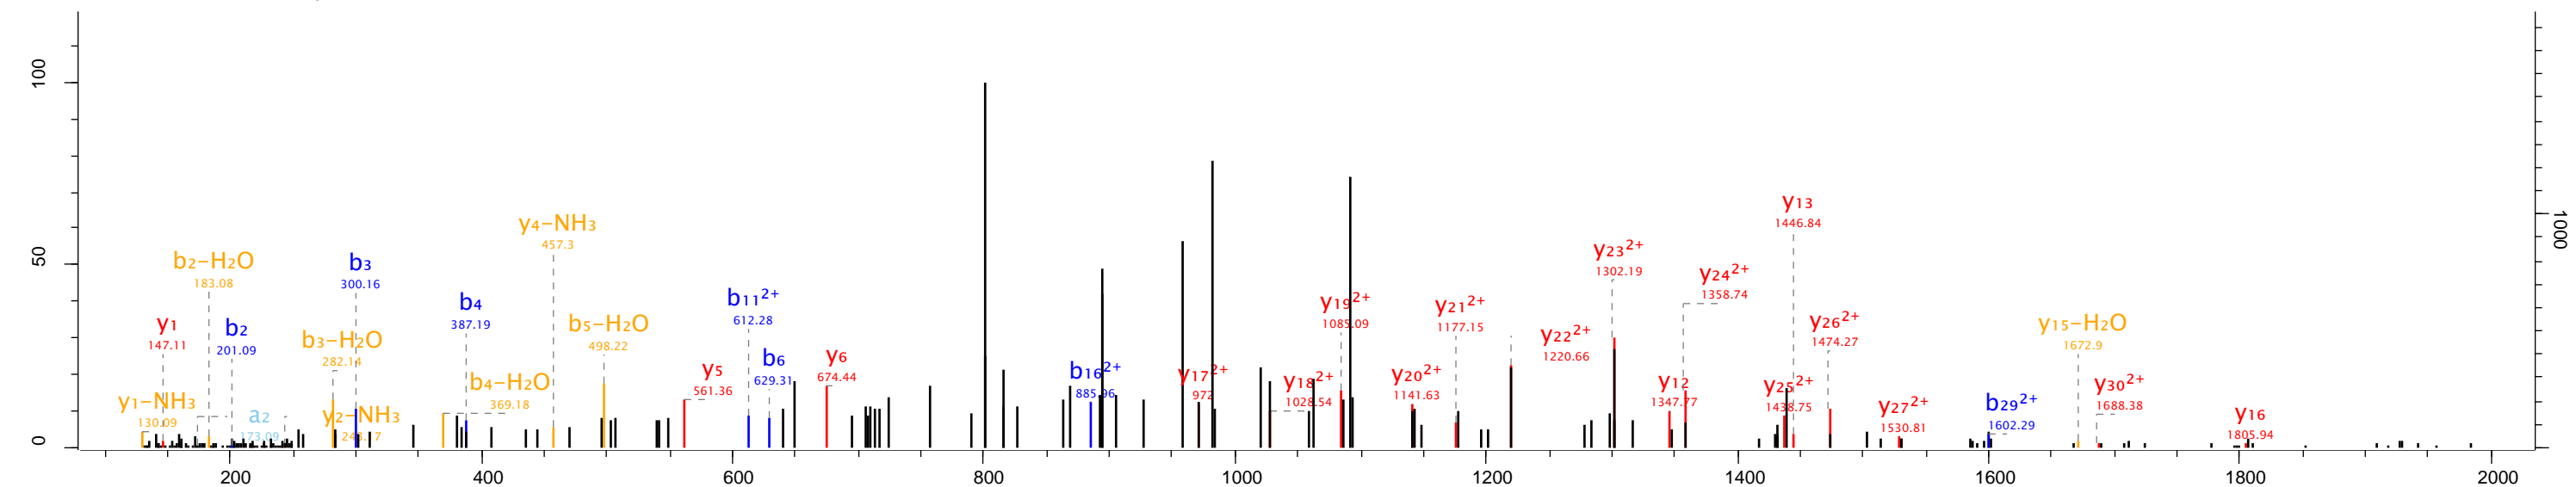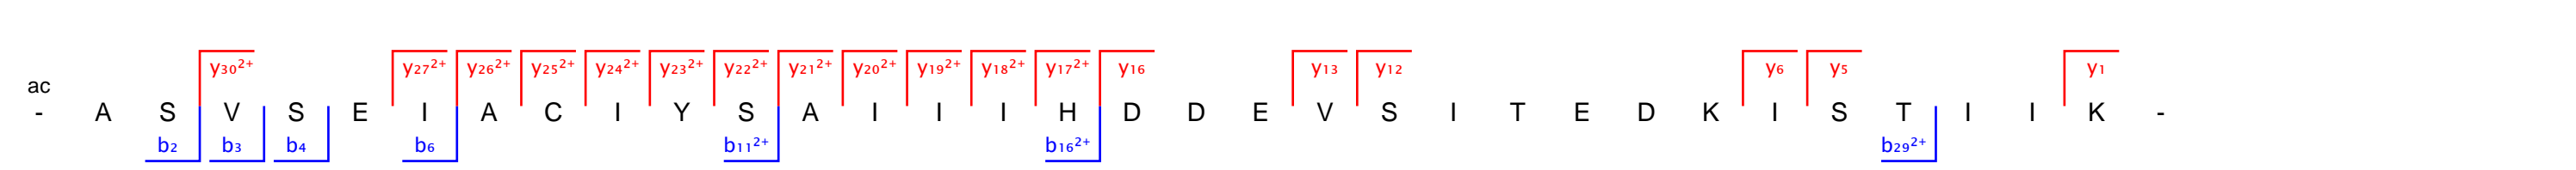

Spectral Annotation for Single-Peptide IDs in 16-cell Embryo using Q-OT-LIT

Raw file 2015-01-05\_CL02\_2Excl15sMaxInj70 Scan 19395 Method ITMS; HCD Score 59.57 m/z 1104.85

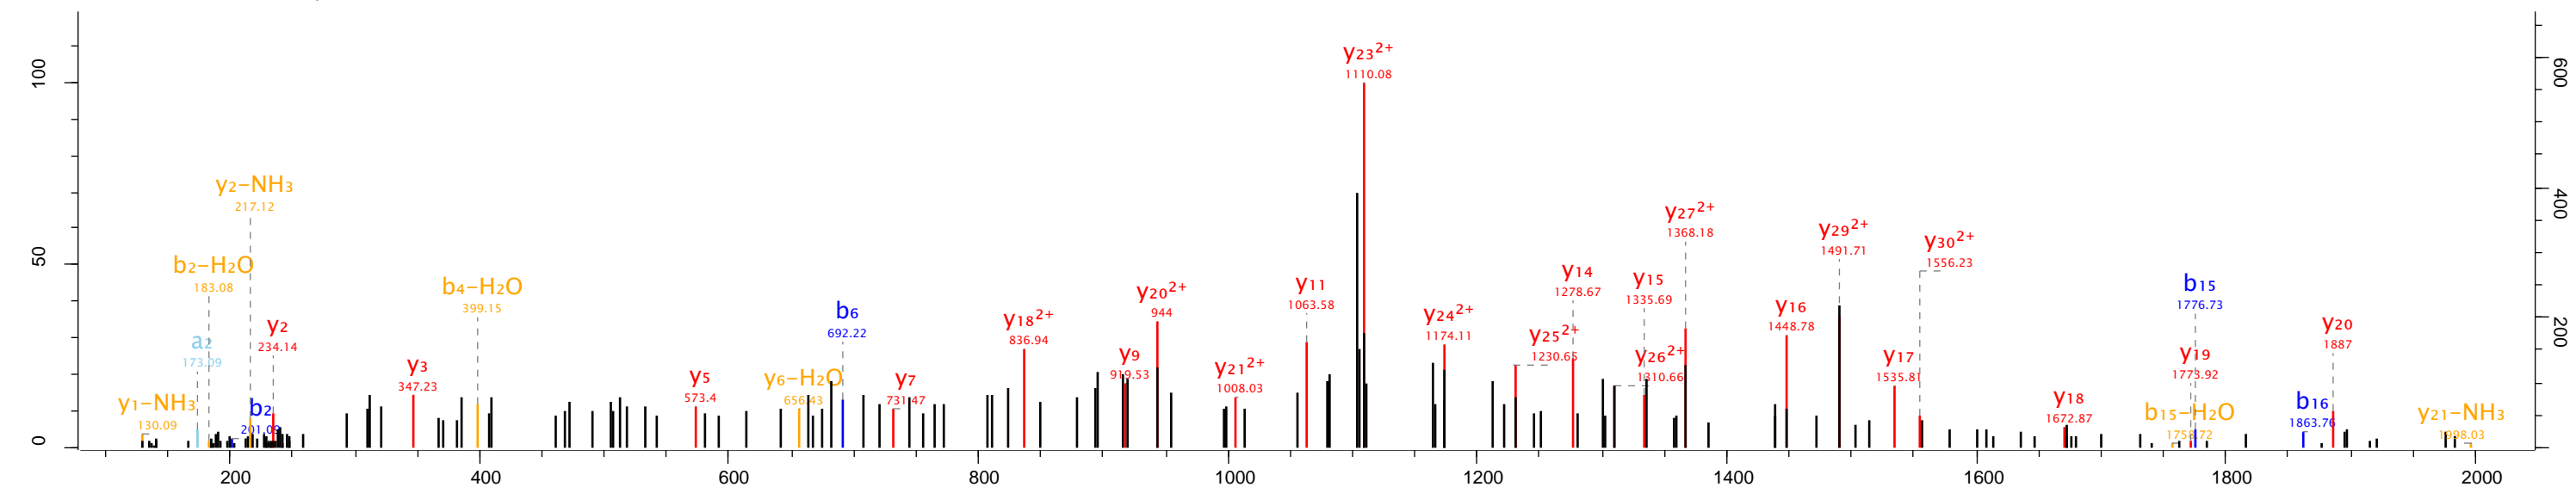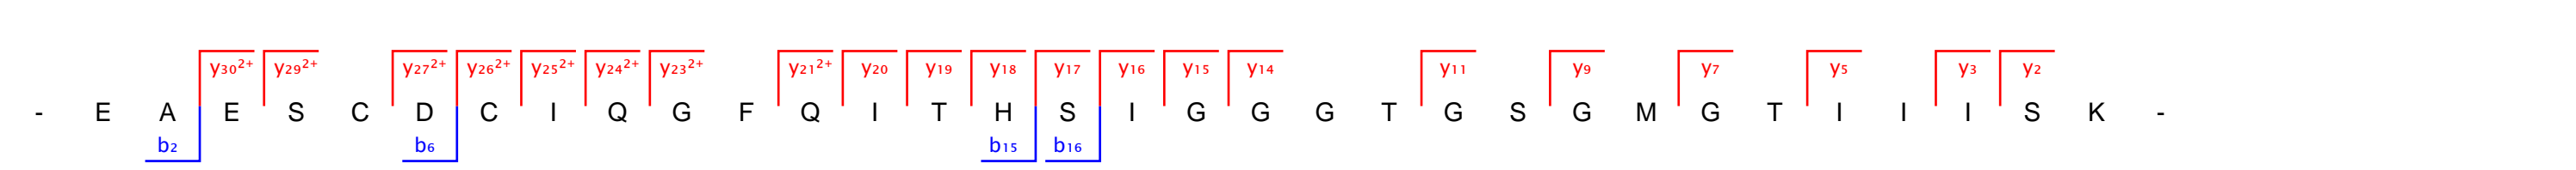

Spectral Annotation for Single-Peptide IDs in 16-cell Embryo using Q-OT-LIT

Raw file 2015-01-05\_CL02\_2Excl15sMaxInj70 Scan 19402 Method ITMS; HCD Score 87.74 m/z 1104.84

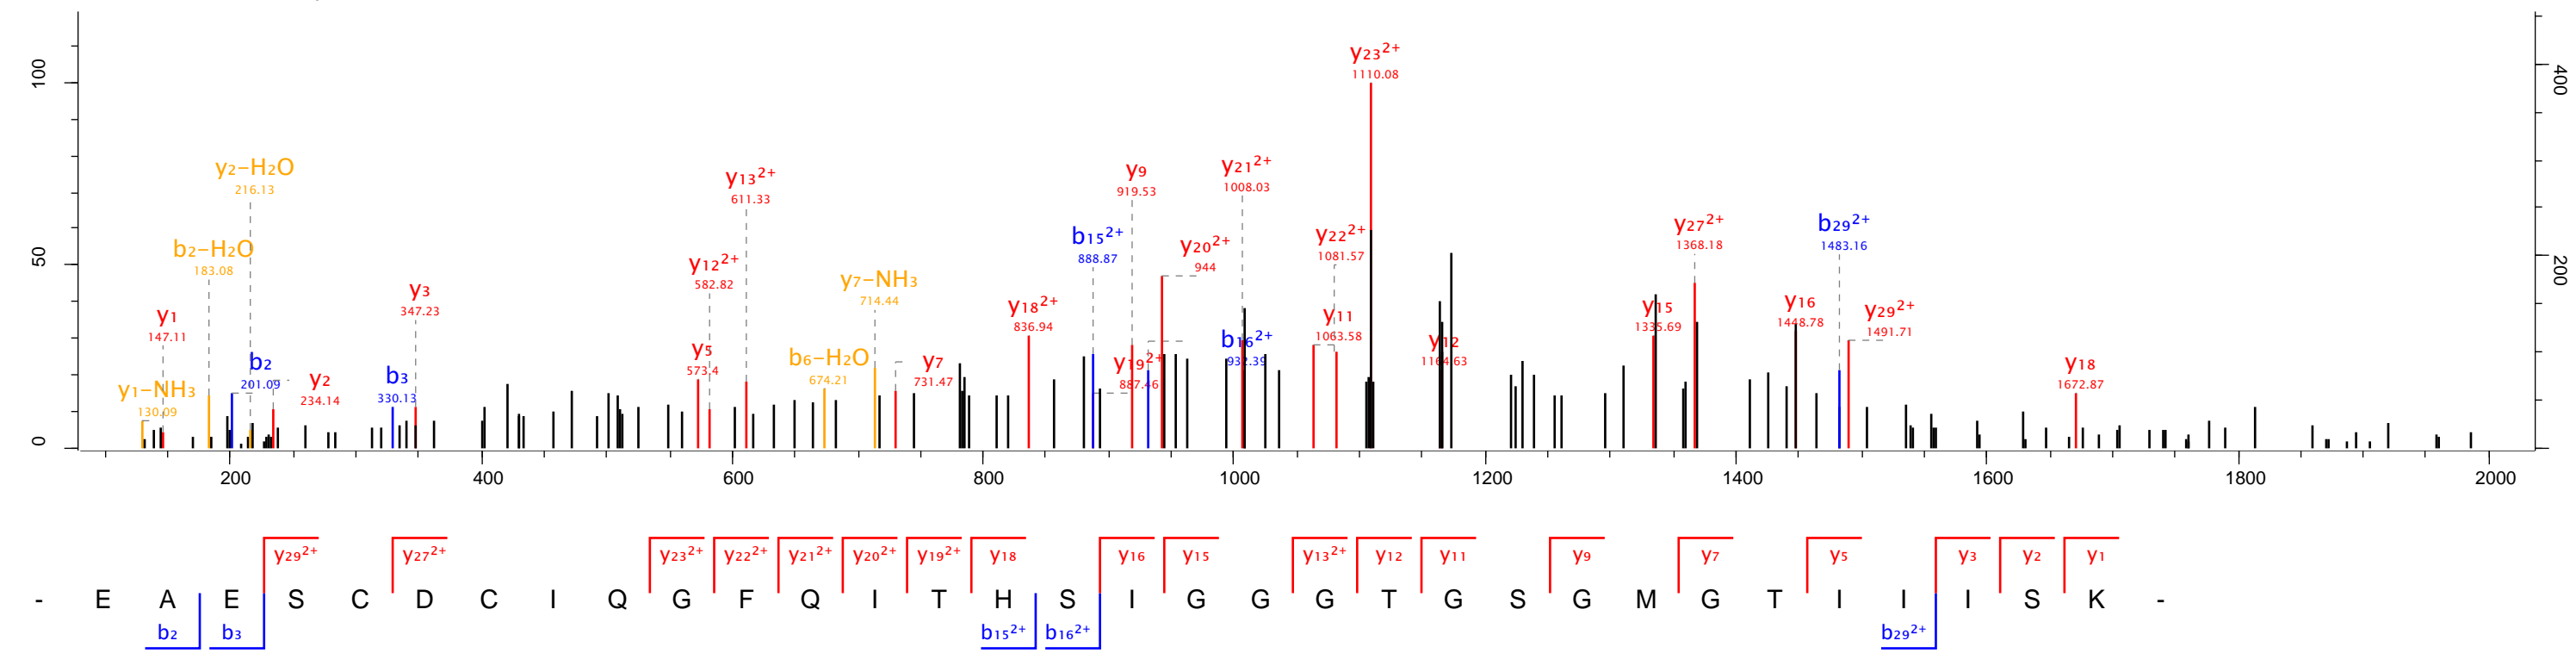

Spectral Annotation for Single-Peptide IDs in 16-cell Embryo using Q-OT-LIT



Raw file: 2015-01-05\_CL02\_2Excl15sMaxInj70  
 Scan: 19410 Method: ITMS; HCD Score: 40.15 m/z: 894.96

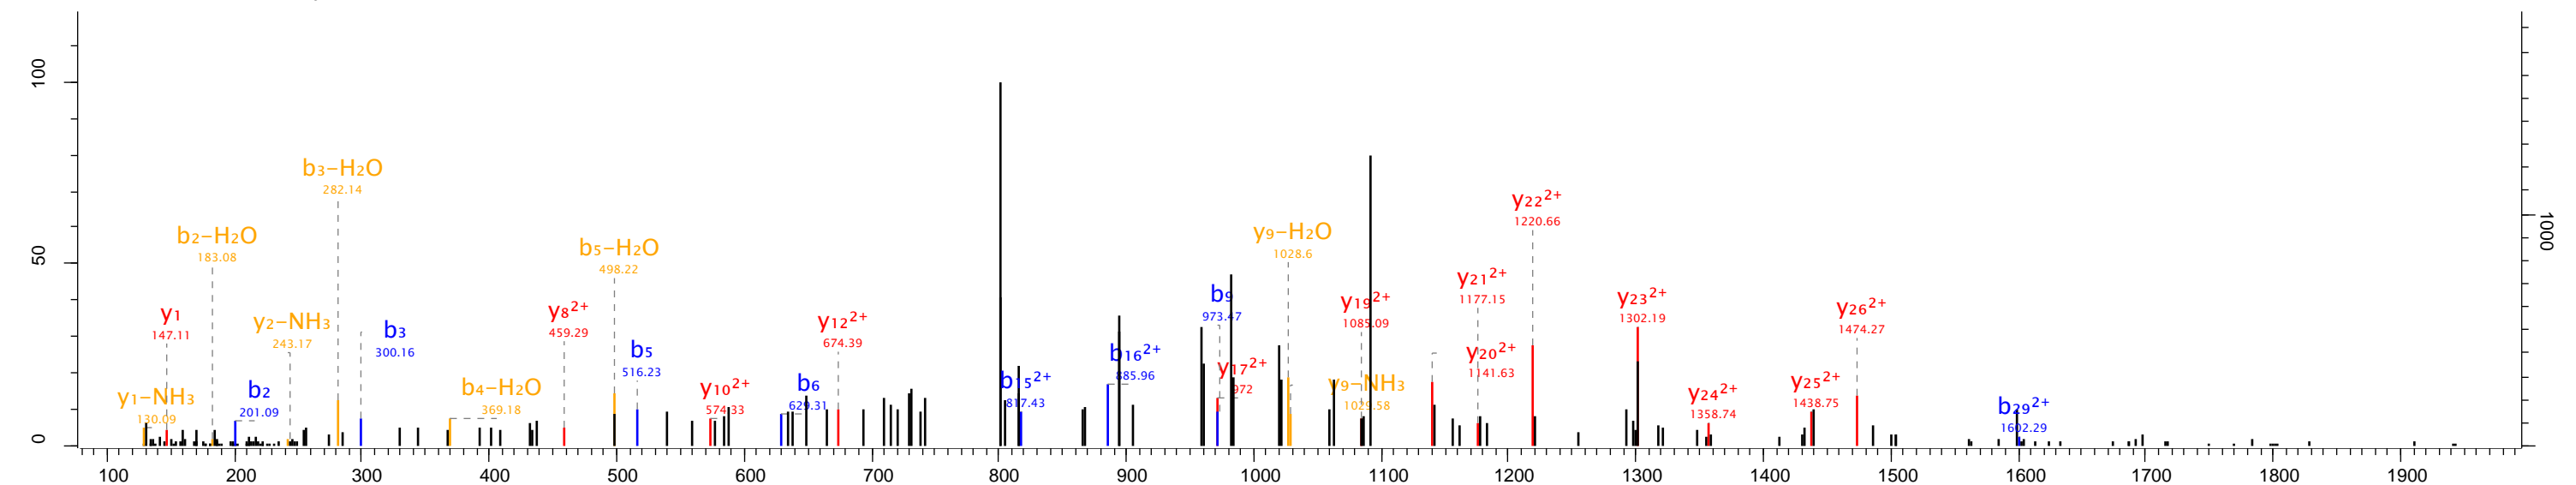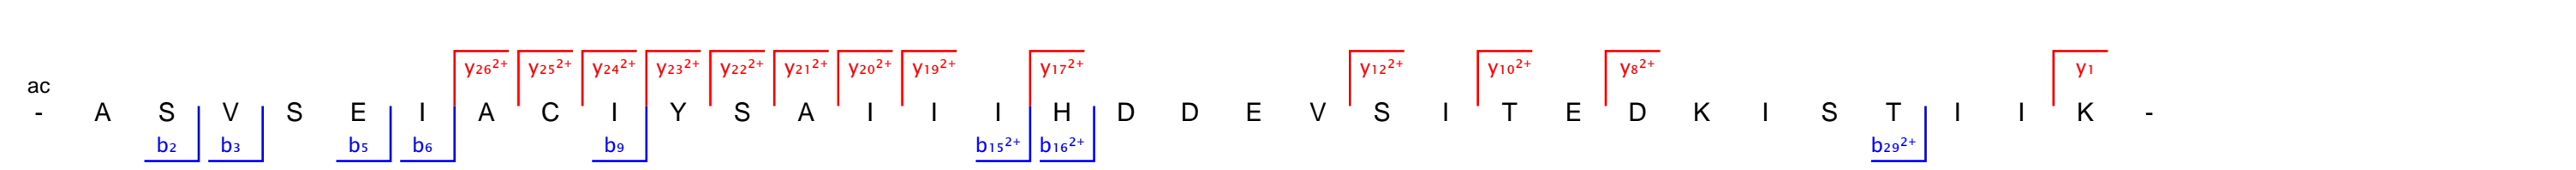

Spectral Annotation for Single-Peptide IDs in 16-cell Embryo using Q-OT-LIT

Raw file: 2015-01-05\_CL02\_2Excl15sMaxInj70  
 Scan: 19450 Method: ITMS; HCD Score: 60.55 m/z: 875.96

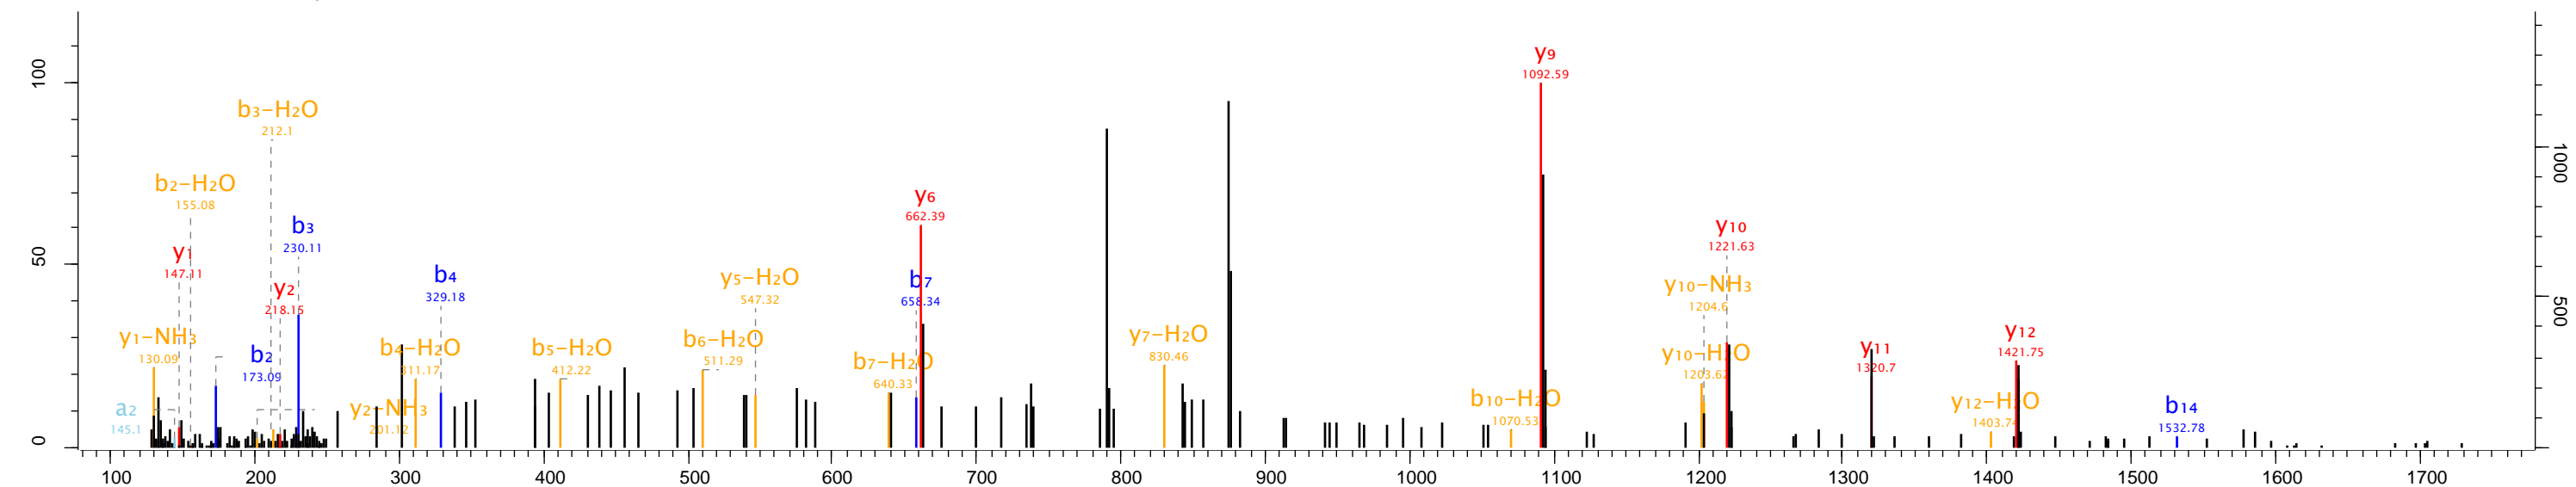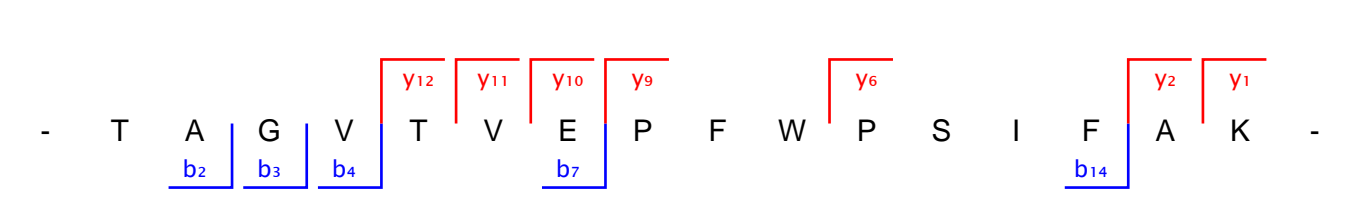

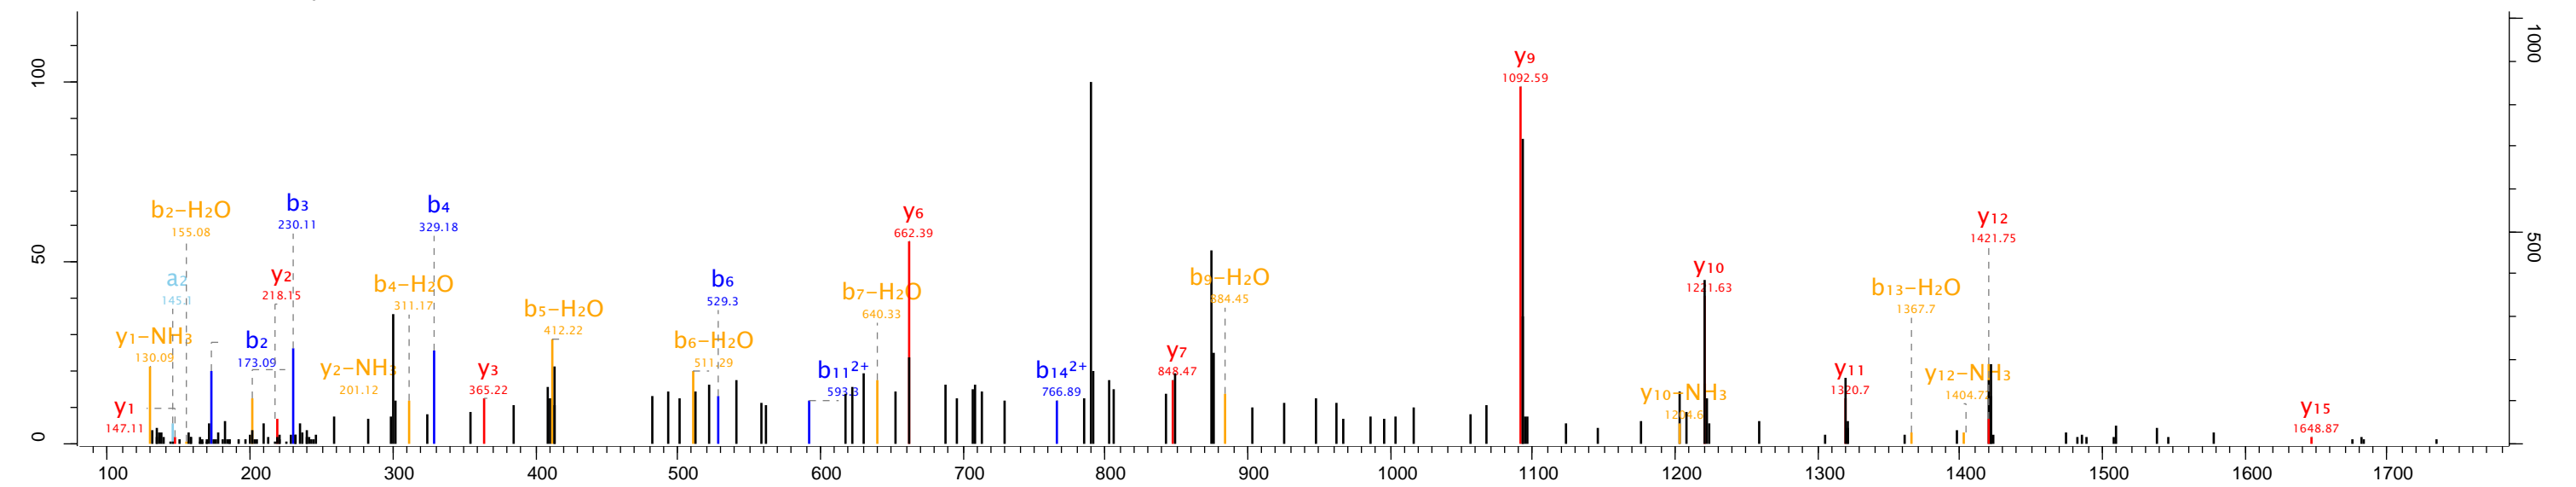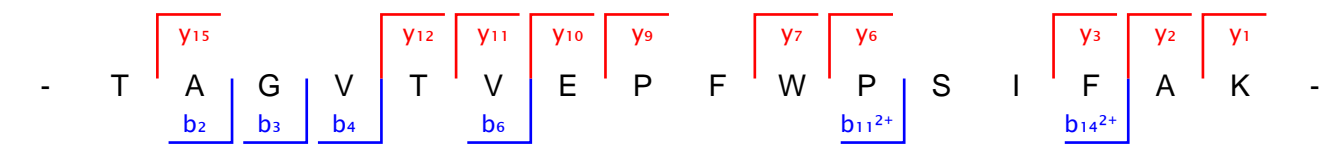

Raw file 2015-01-05\_CL02\_2Excl15sMaxInj70 Scan 19483 Method ITMS; HCD Score 53.01 m/z 875.46

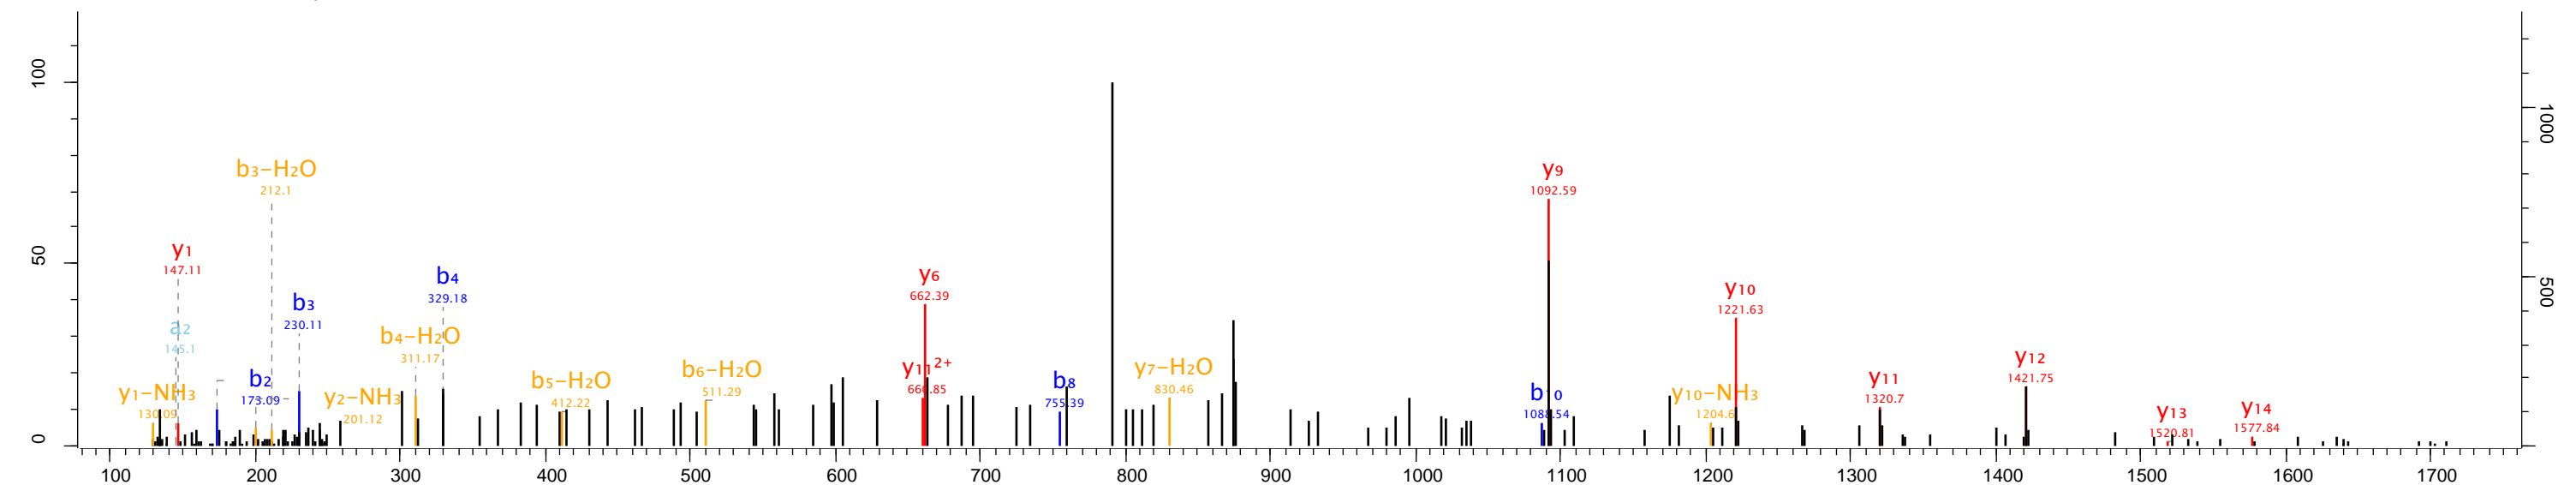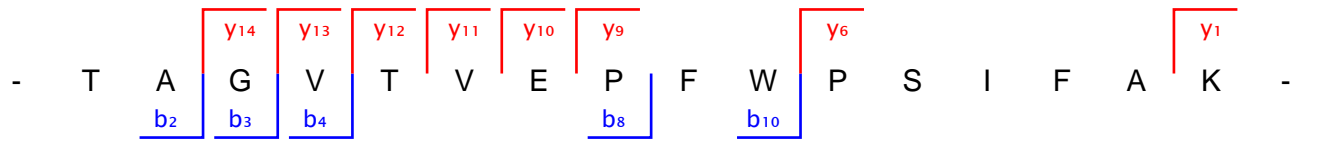

Spectral Annotation for Single-Peptide IDs in 16-cell Embryo using Q-OT-LIT

Raw file 2015-01-05\_CL02\_2Excl15sMaxInj70 Scan 19502 Method ITMS; HCD Score 35.93 m/z 1104.51

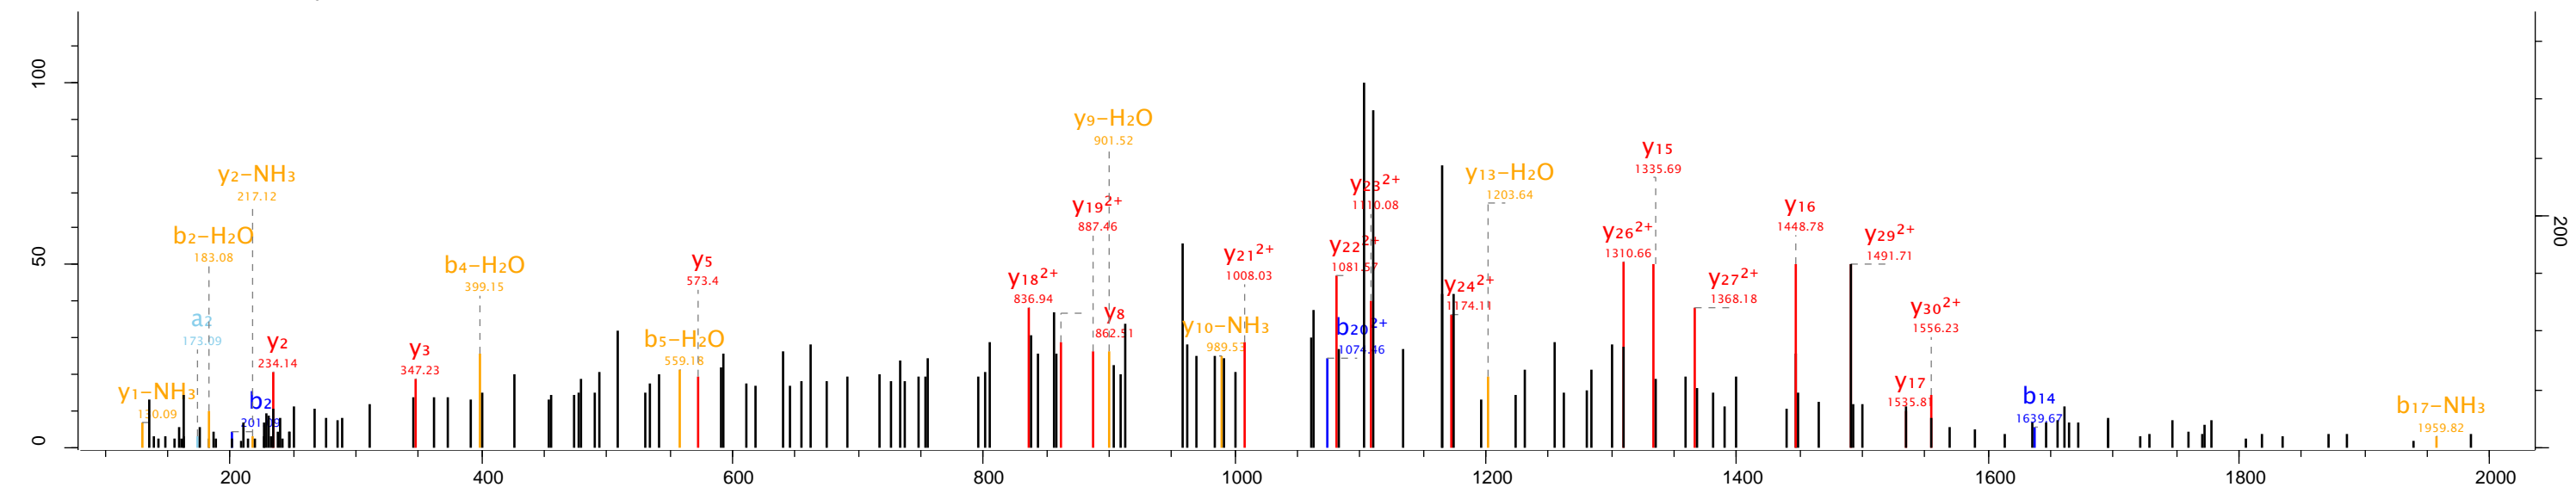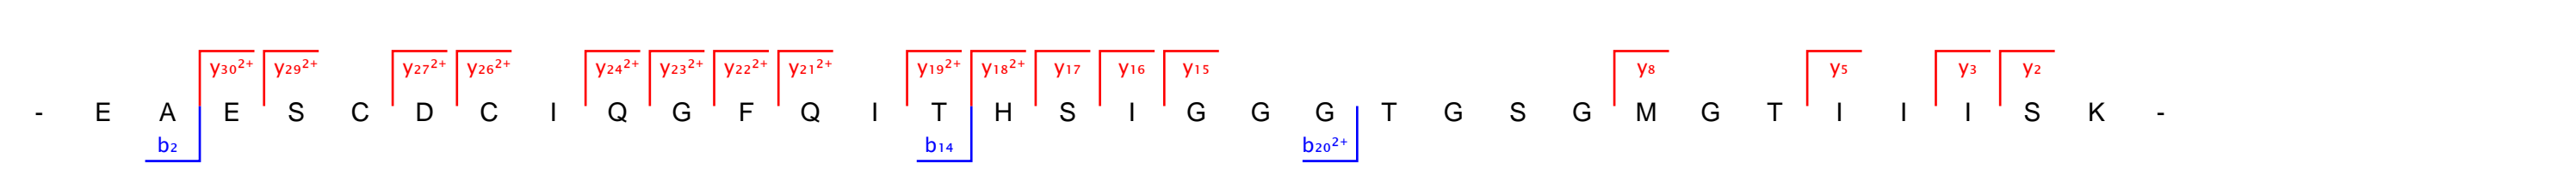

Raw file 2015-01-05\_CL02\_2Excl15sMaxInj70 Scan 19785 Method ITMS; HCD Score 89.37 m/z 602.32

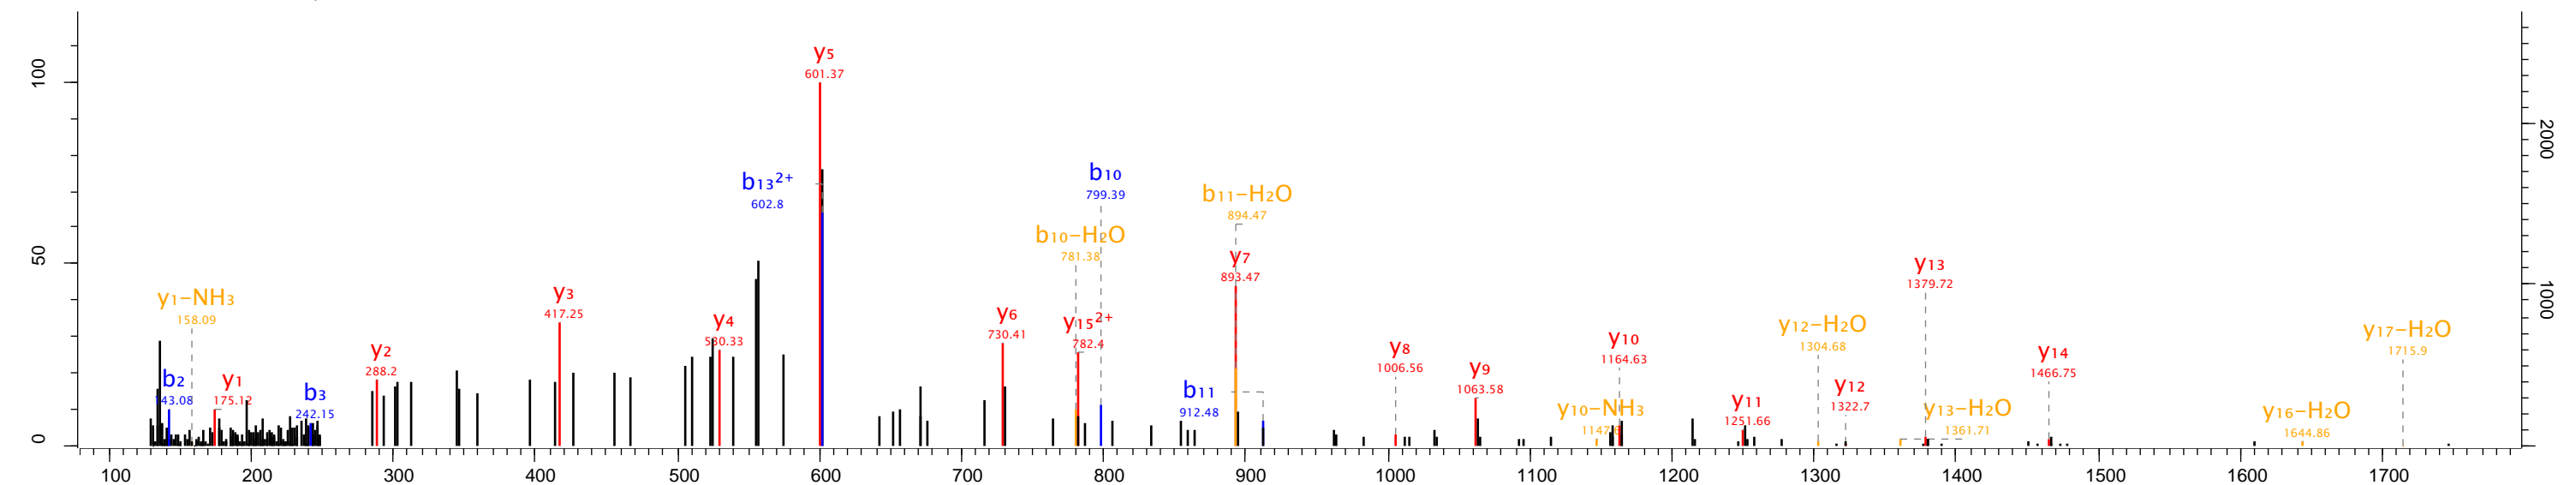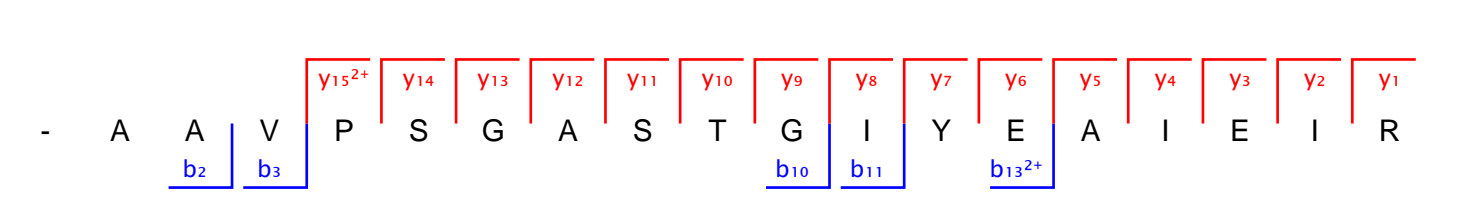

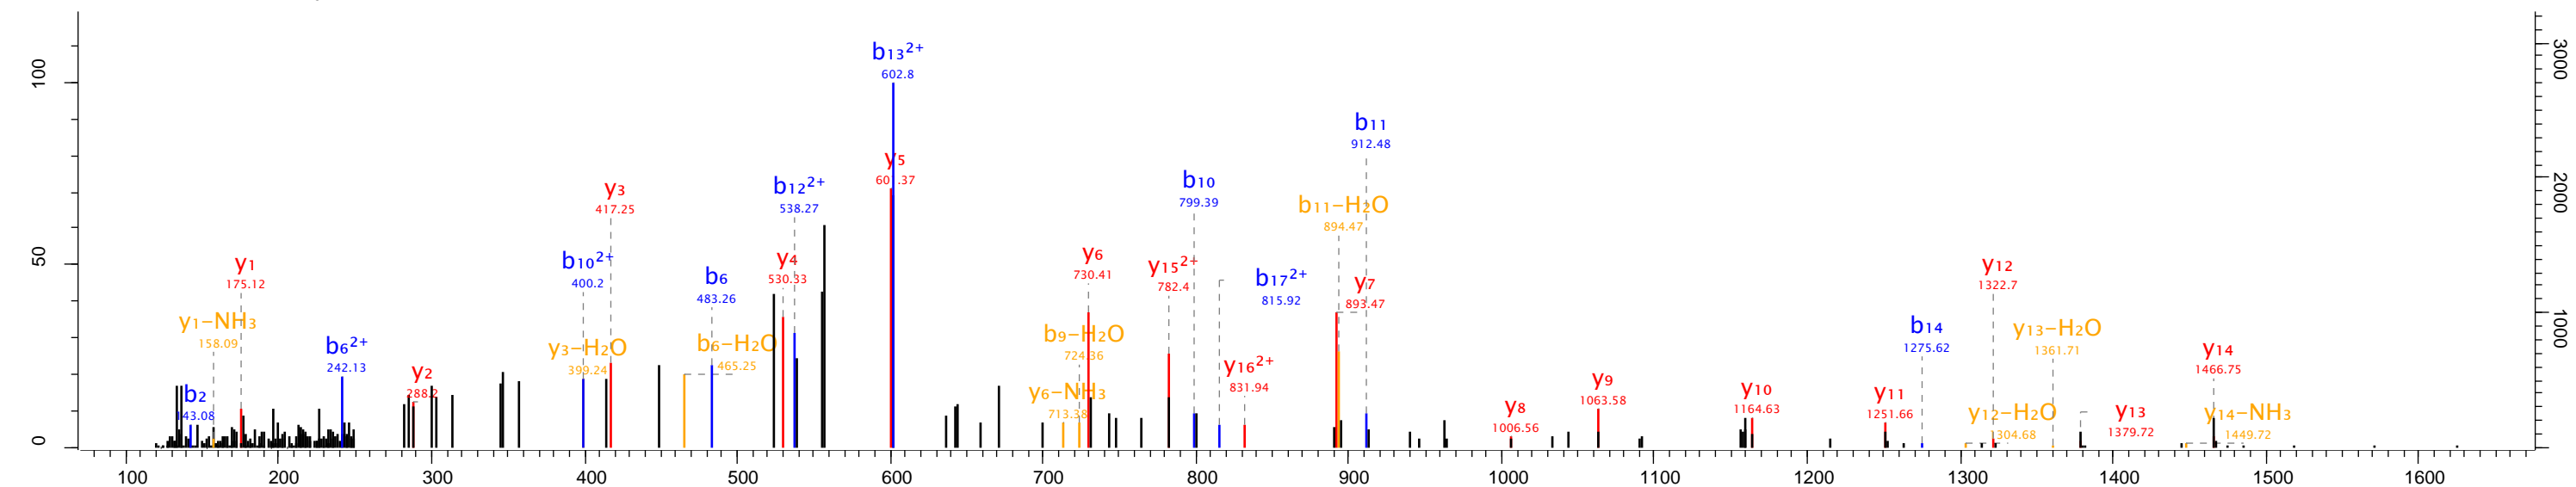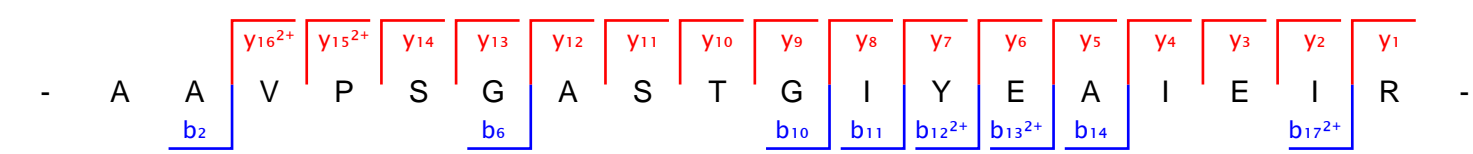

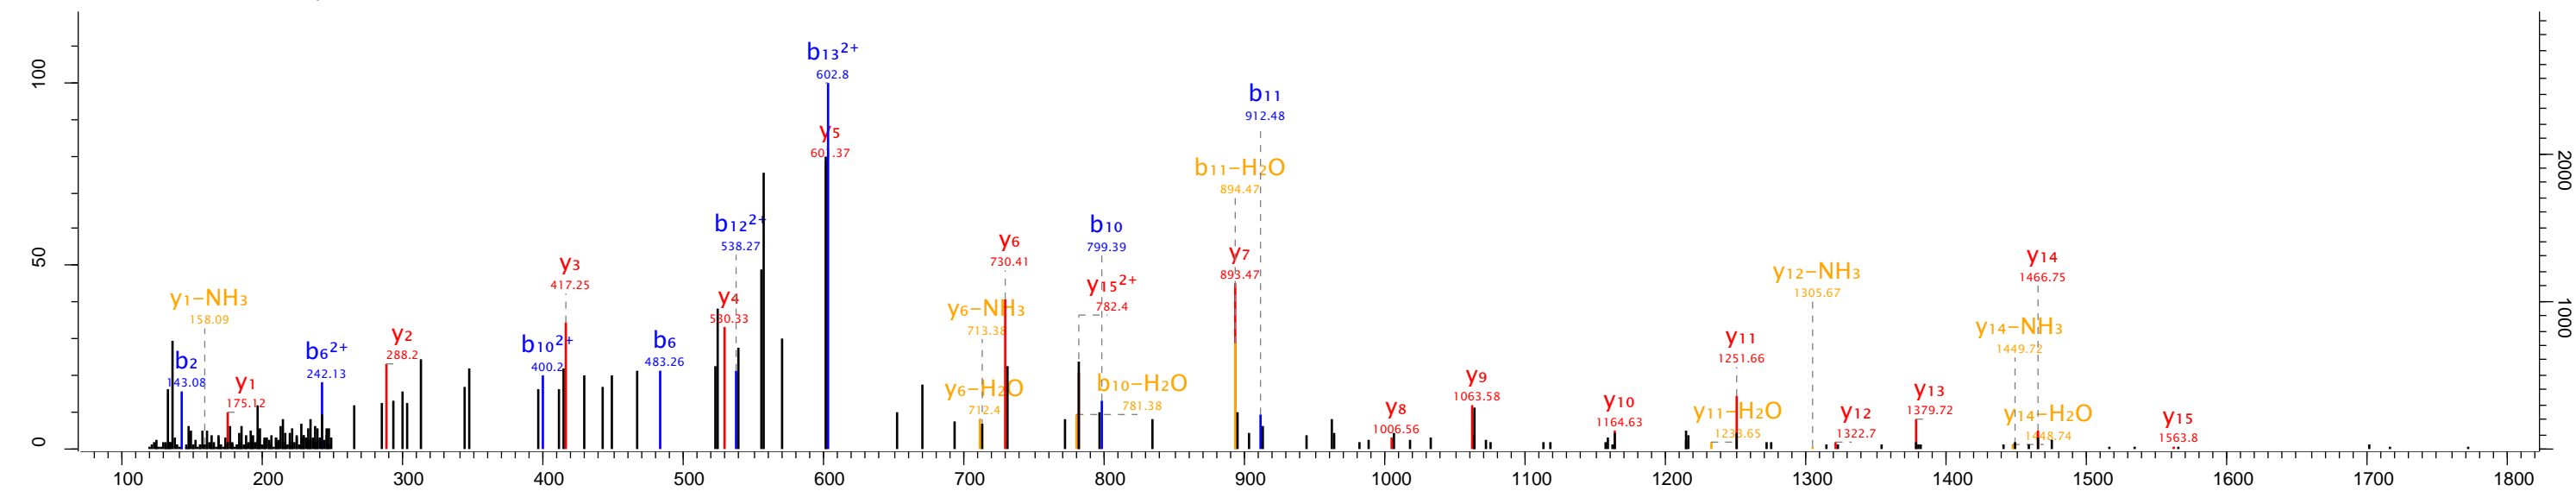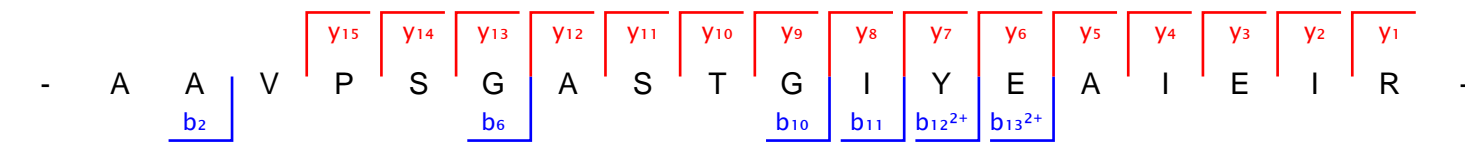



Raw file 2015-01-05\_CL02\_2Excl15sMaxInj70 Scan 19820 Method ITMS; HCD Score 97.35 m/z 602.32

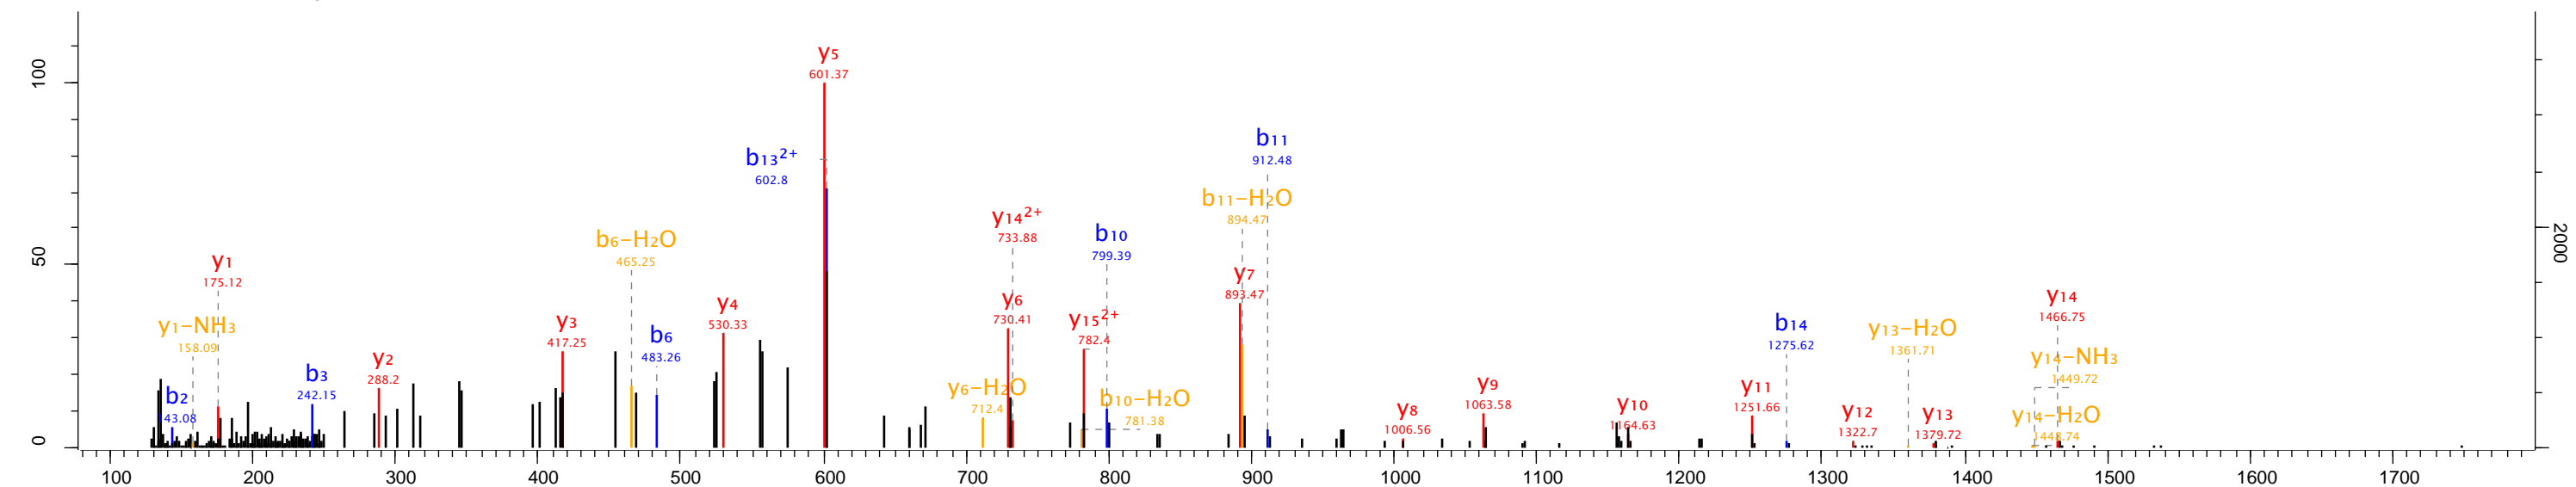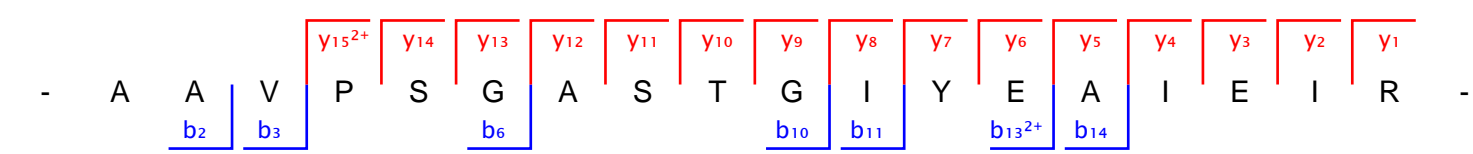

Spectral Annotation for Single-Peptide IDs in 16-cell Embryo using Q-OT-LIT

Raw file 2015-01-05\_CL02\_2Excl15sMaxInj70 Scan 19872 Method ITMS; HCD Score 55.44 m/z 923.41

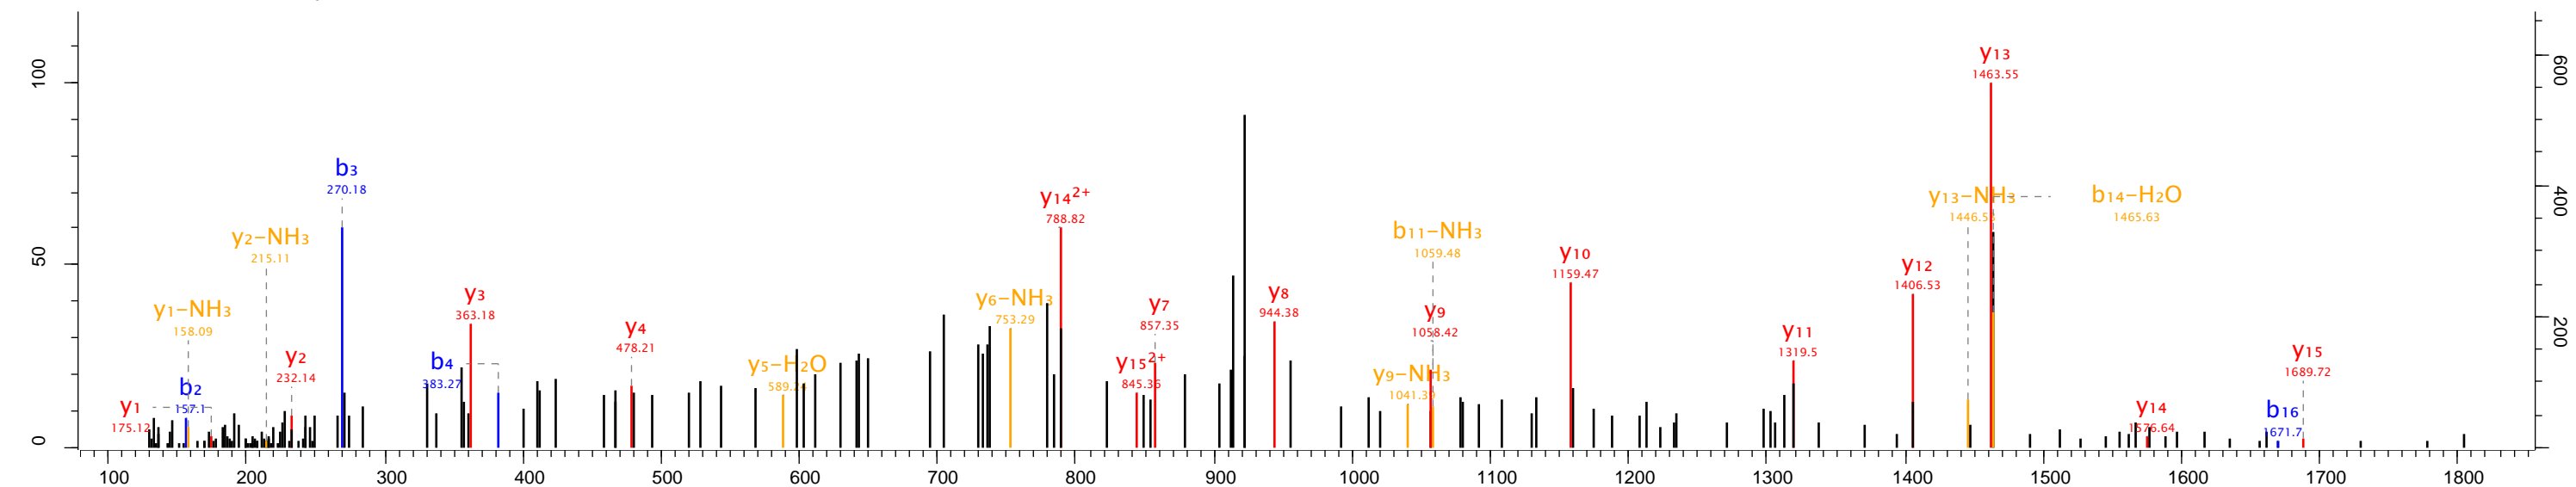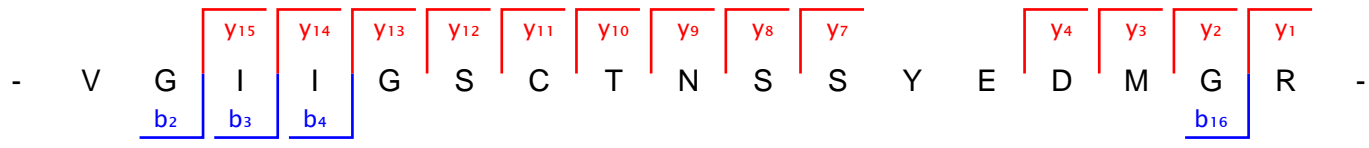

Spectral Annotation for Single-Peptide IDs in 16-cell Embryo using Q-OT-LIT

Raw file: 2015-01-05\_CL02\_2Excl15sMaxInj70  
 Scan: 20196  
 Method: ITMS; HCD  
 Score: 58.52  
 m/z: 874.91

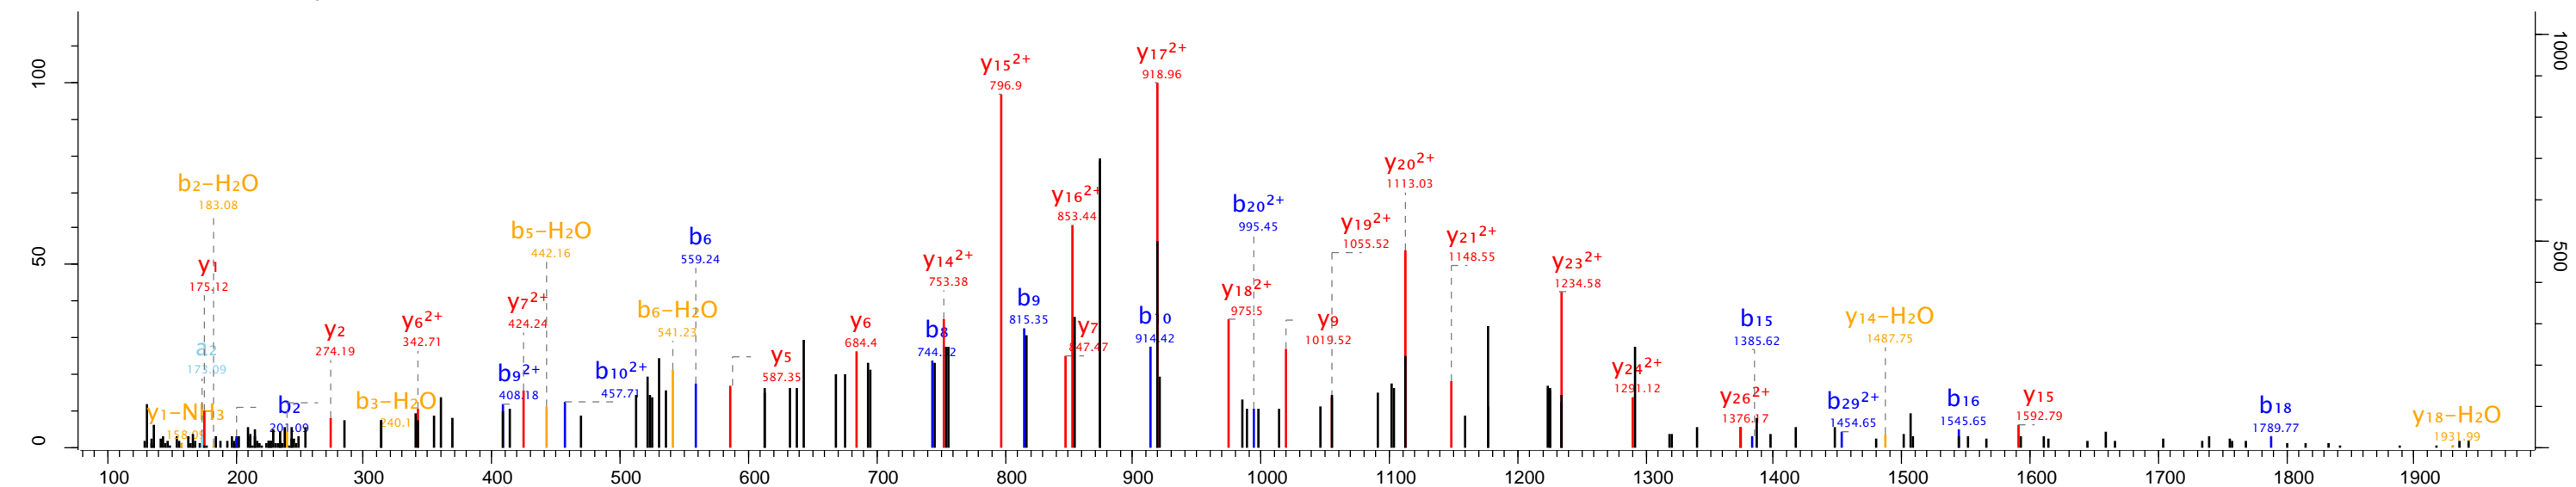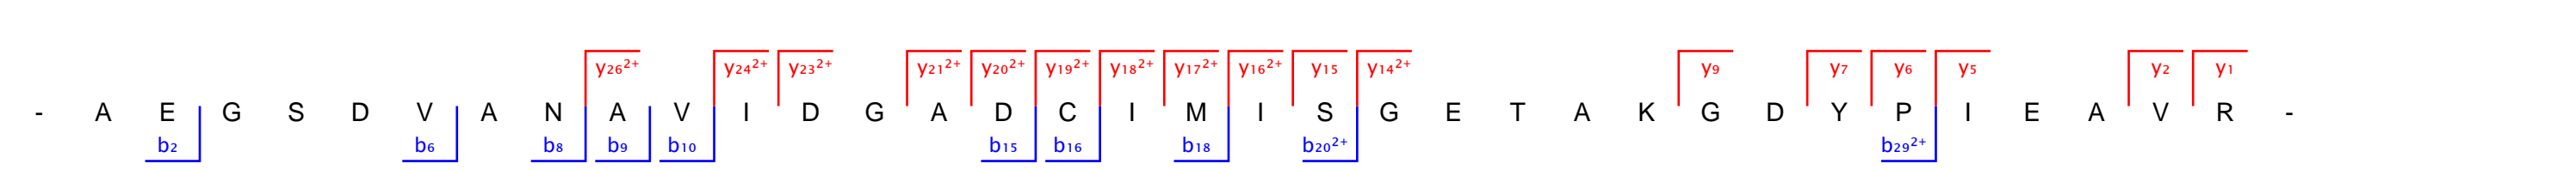

Spectral Annotation for Single-Peptide IDs in 16-cell Embryo using Q-OT-LIT

Raw file Scan Method Score m/z  
 2015-01-05\_CL02\_2Excl15sMaxInj70 20202 ITMS; HCD 86.54 874.66

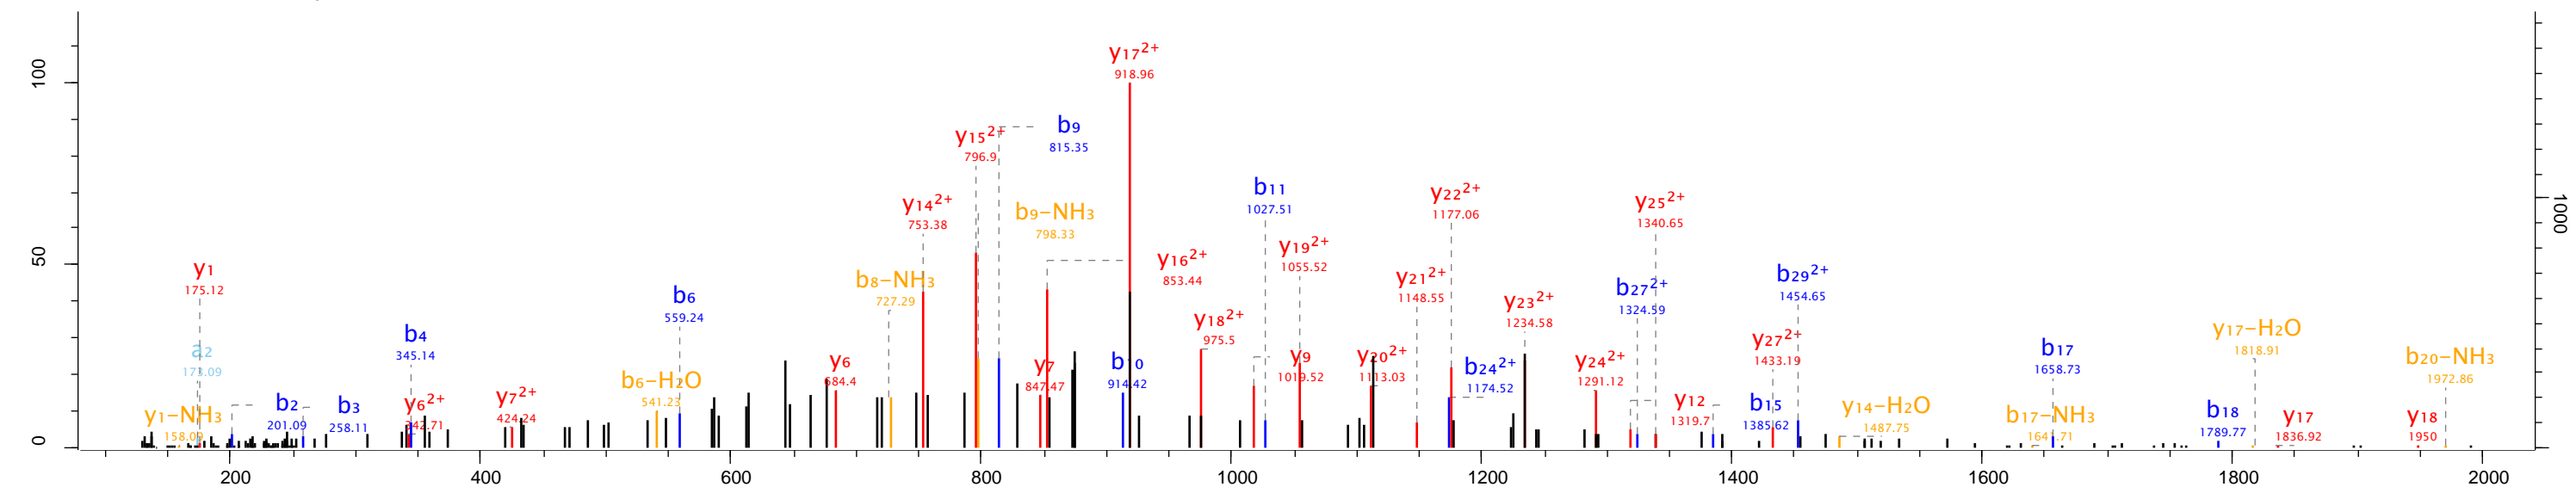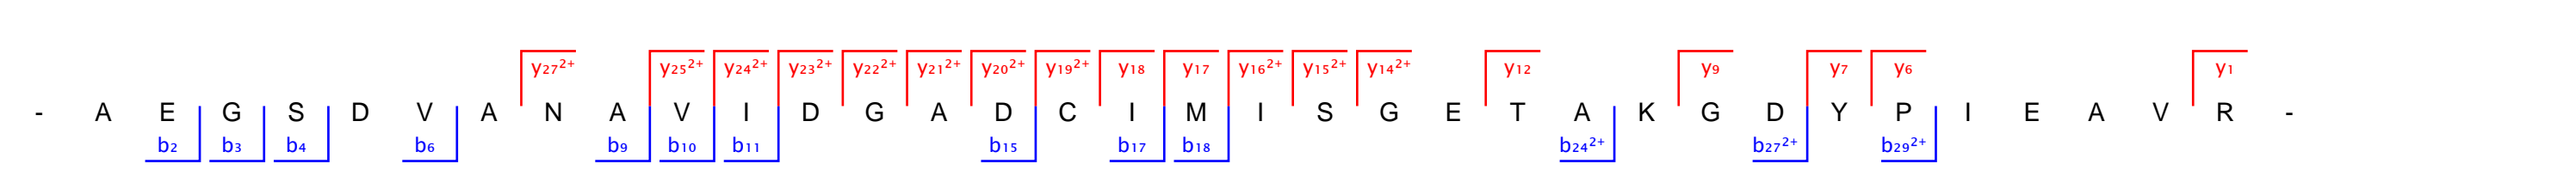

Spectral Annotation for Single-Peptide IDs in 16-cell Embryo using Q-OT-LIT

Raw file 2015-01-05\_CL02\_2Excl15sMaxInj70 Scan 20240 Method ITMS; HCD Score 55.34 m/z 1166.22

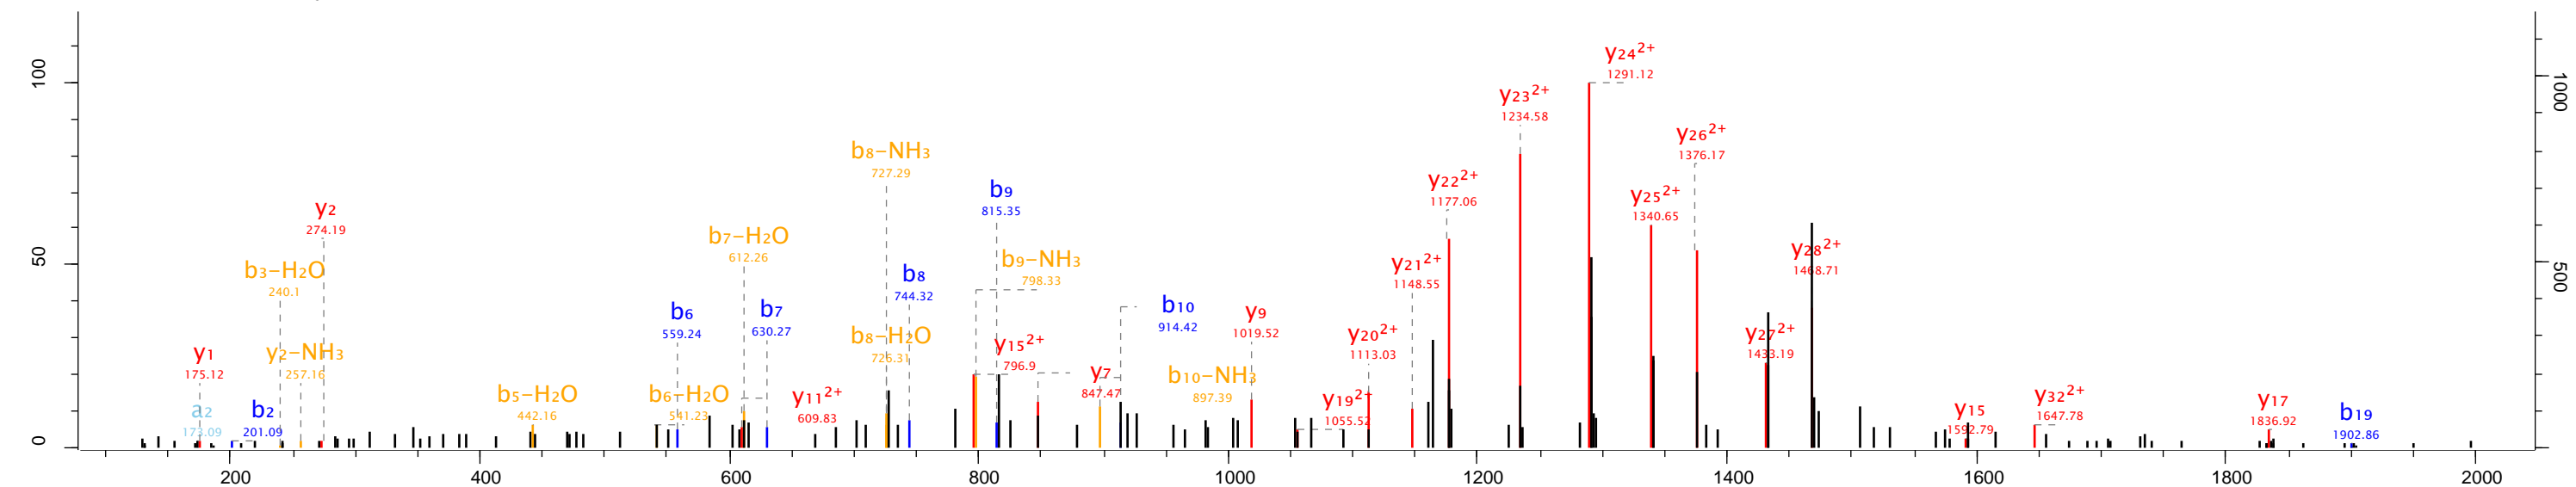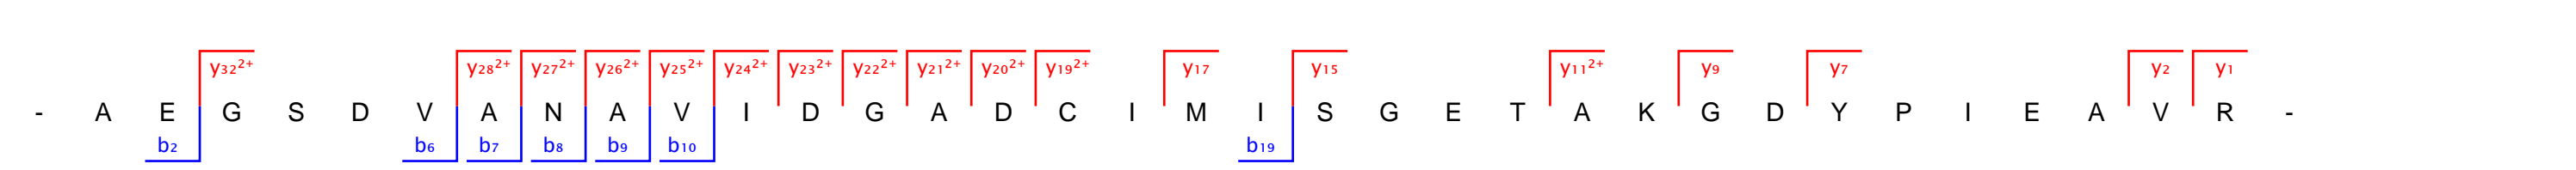

Raw file Scan Method Score m/z  
 2015-01-05\_CL02\_2Excl15sMaxInj70 20256 ITMS; HCD 86.14 1166.21

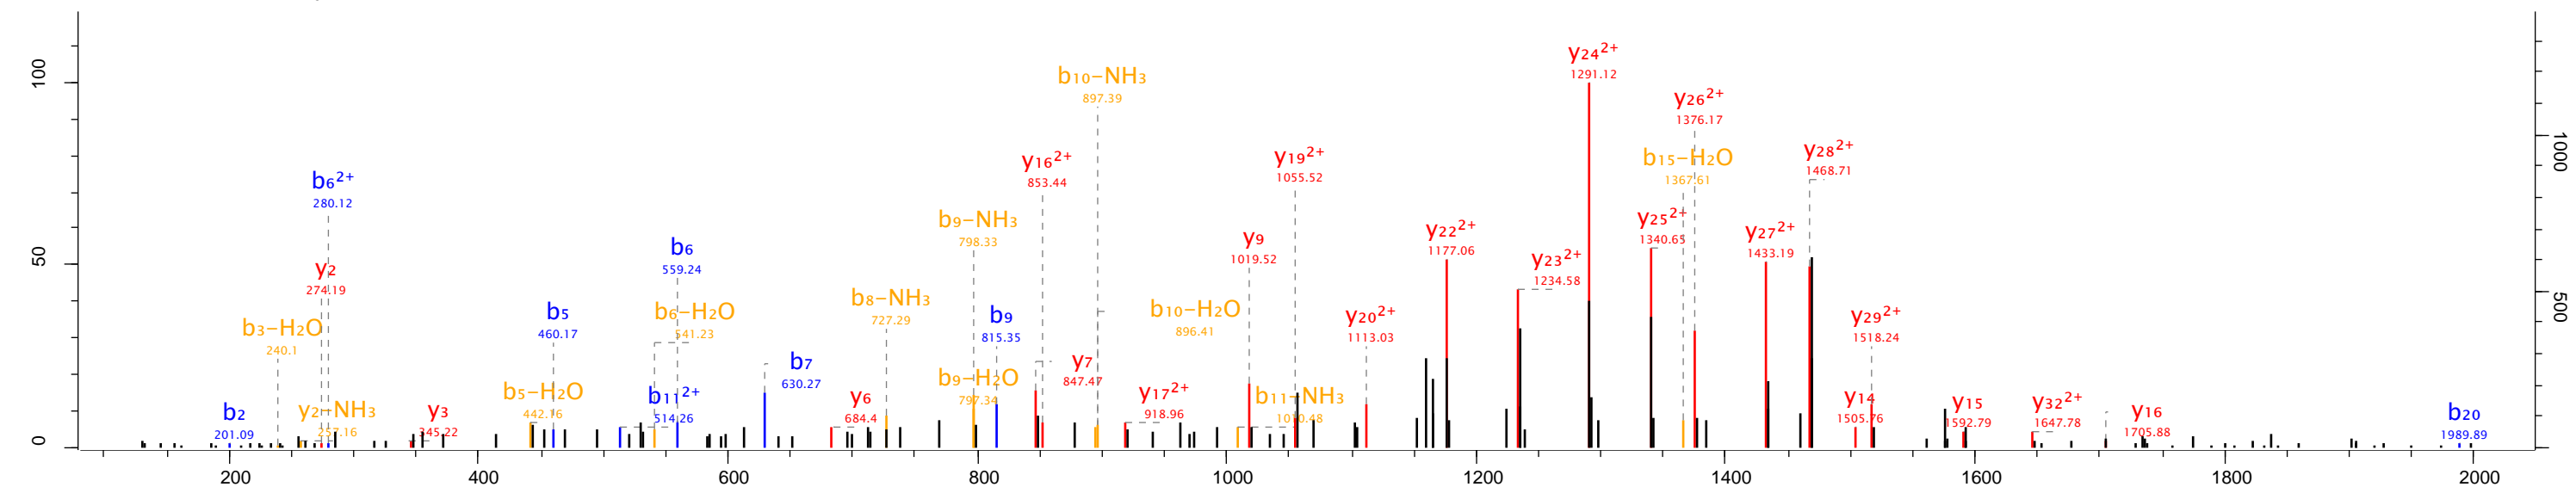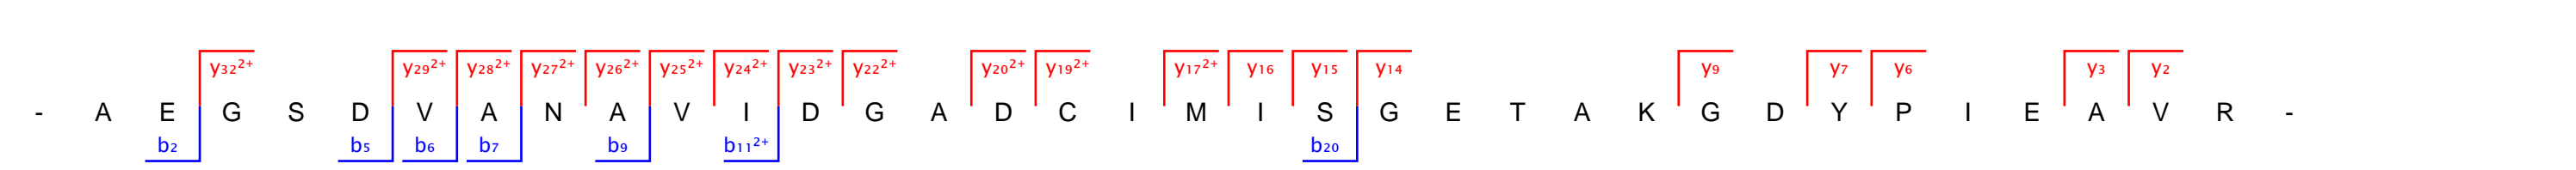

Raw file 2015-01-05\_CL02\_2Excl15sMaxInj70 Scan 20258 Method ITMS; HCD Score 79.28 m/z 874.91

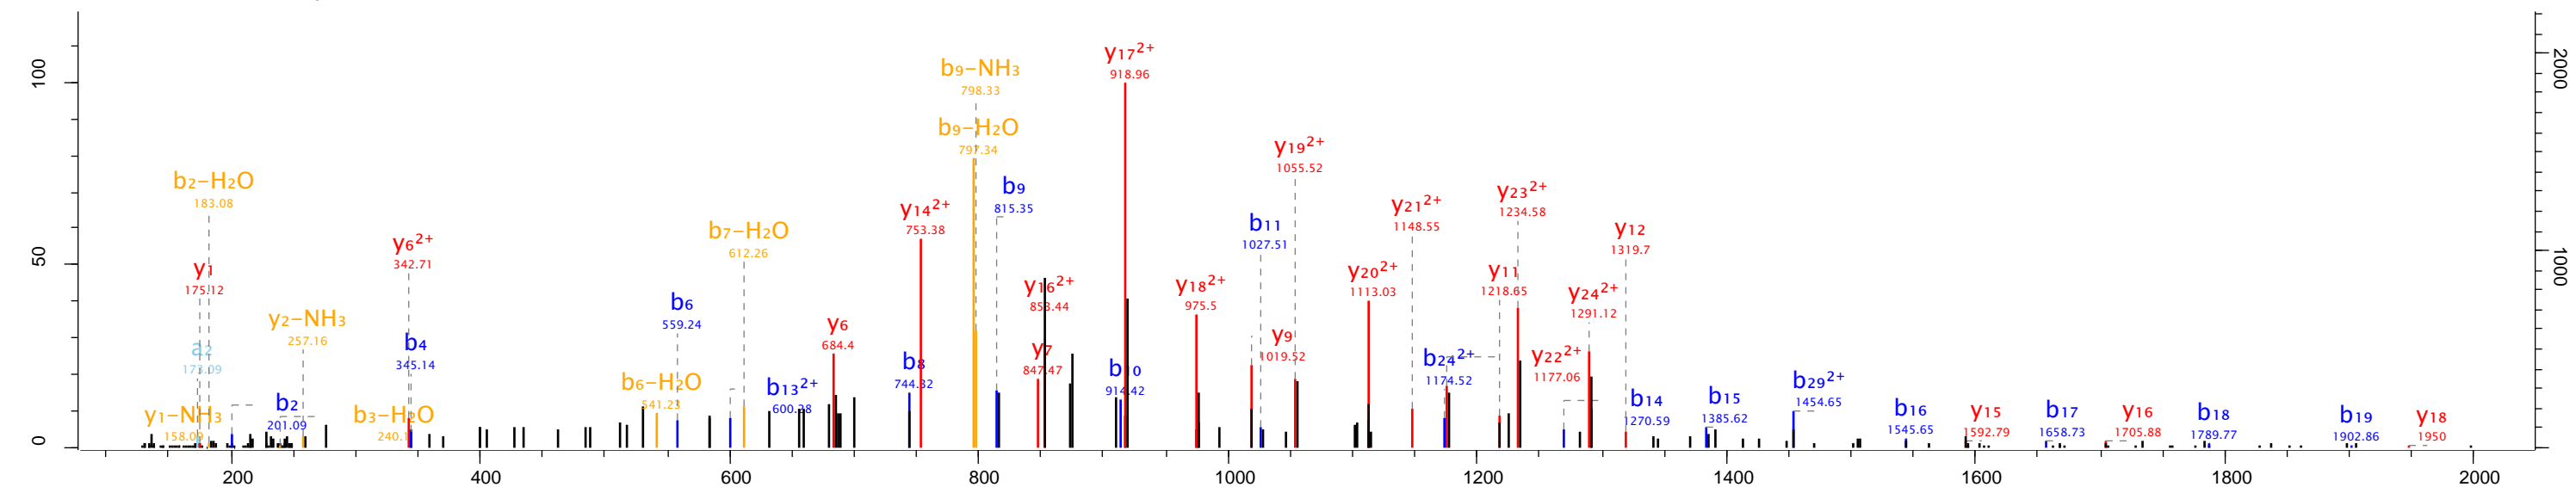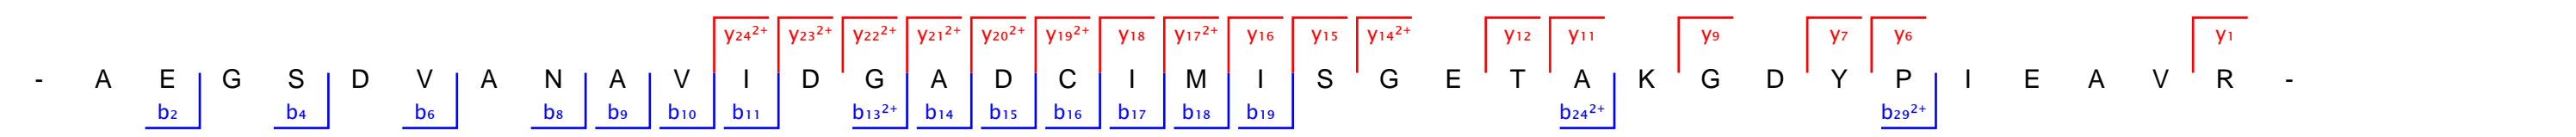

Spectral Annotation for Single-Peptide IDs in 16-cell Embryo using Q-OT-LIT

Raw file: 2015-01-05\_CL02\_2Excl15sMaxInj70  
 Scan: 20299 Method: ITMS; HCD Score: 68.93 m/z: 1165.88

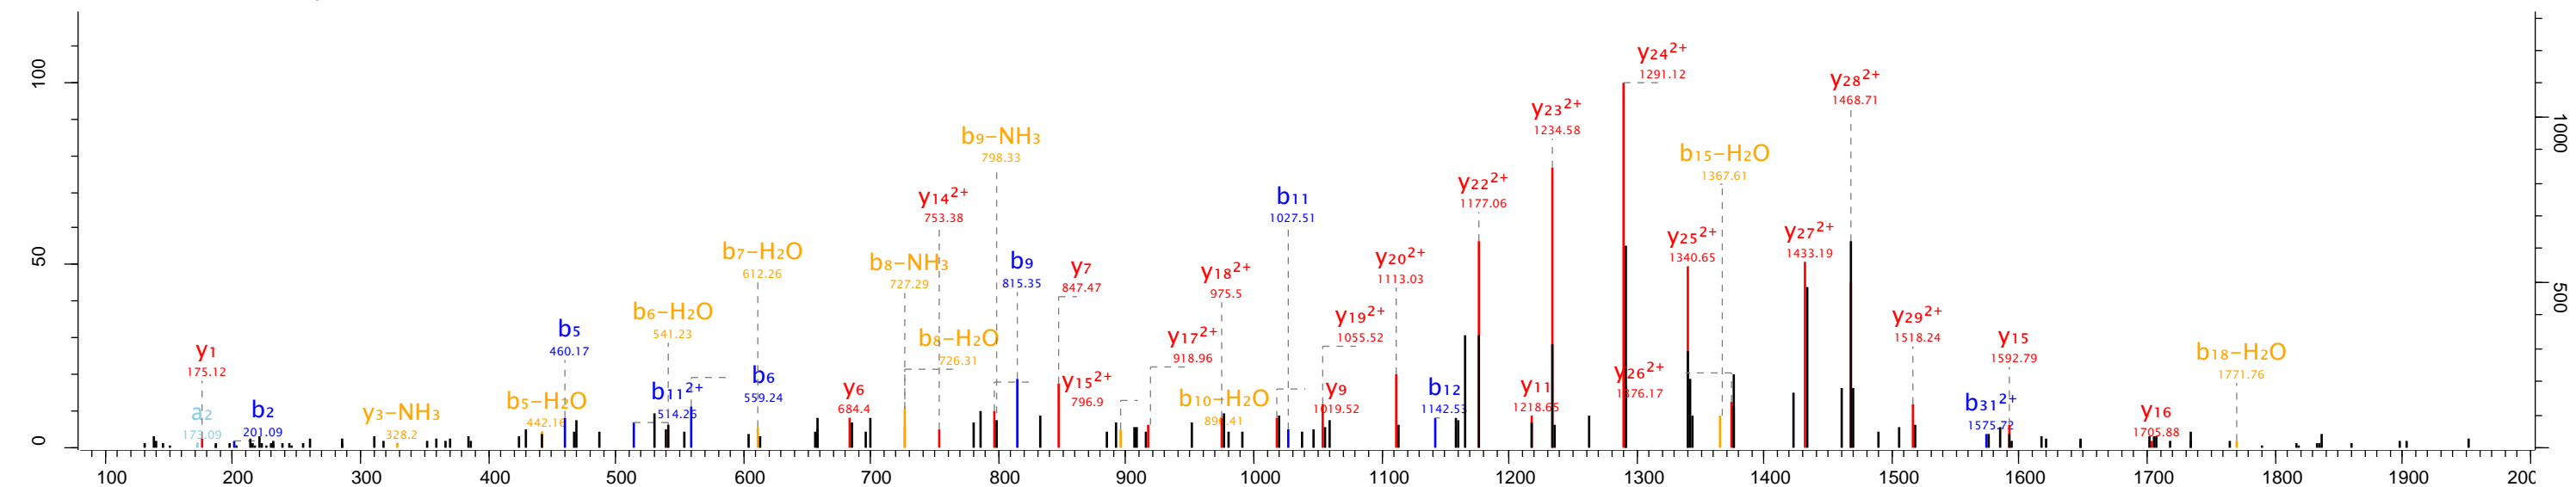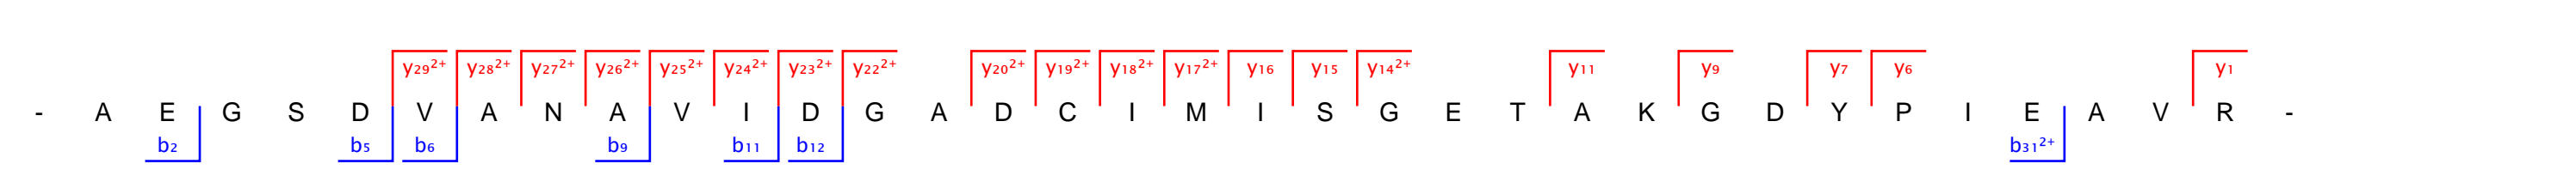



Raw file: 2015-01-05\_CL02\_2Excl15sMaxInj70  
 Scan: 22017 Method: ITMS; HCD Score: 52.09 m/z: 705.05

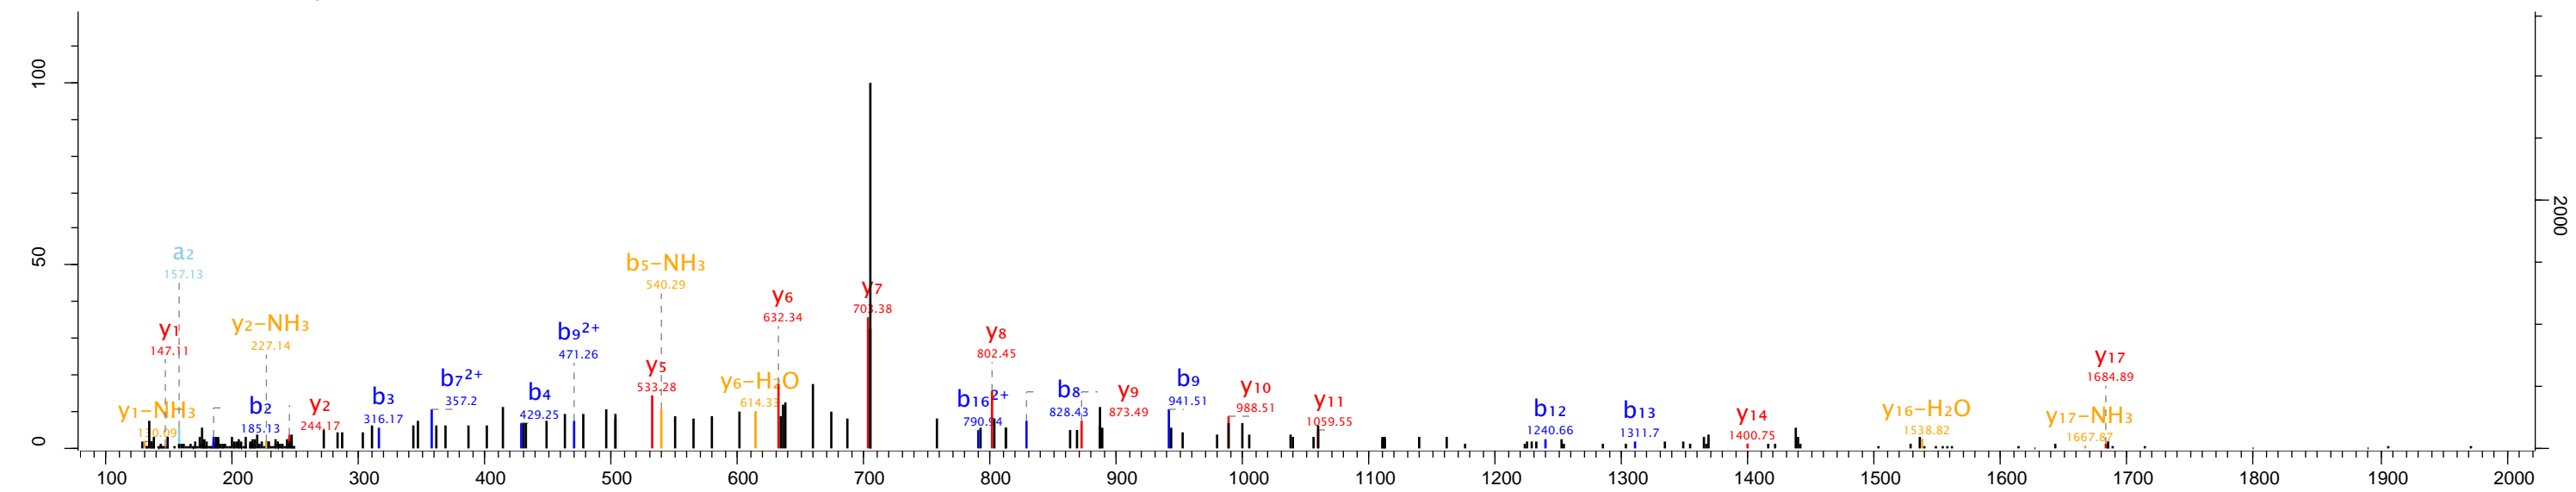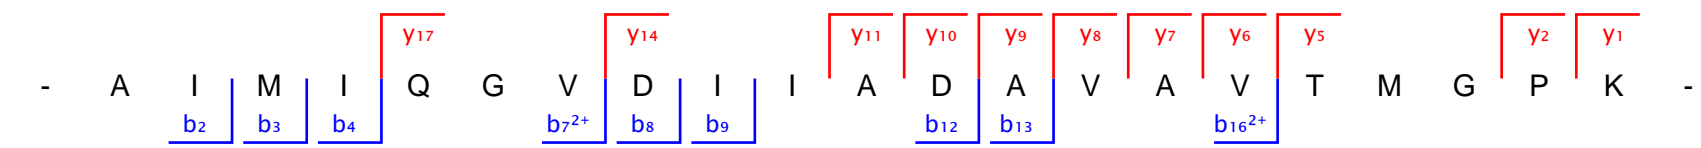

Spectral Annotation for Single-Peptide IDs in 16-cell Embryo using Q-OT-LIT

Raw file 2015-01-05\_CL02\_2Excl15sMaxInj70 Scan 22024 Method ITMS; HCD Score 47.29 m/z 705.05

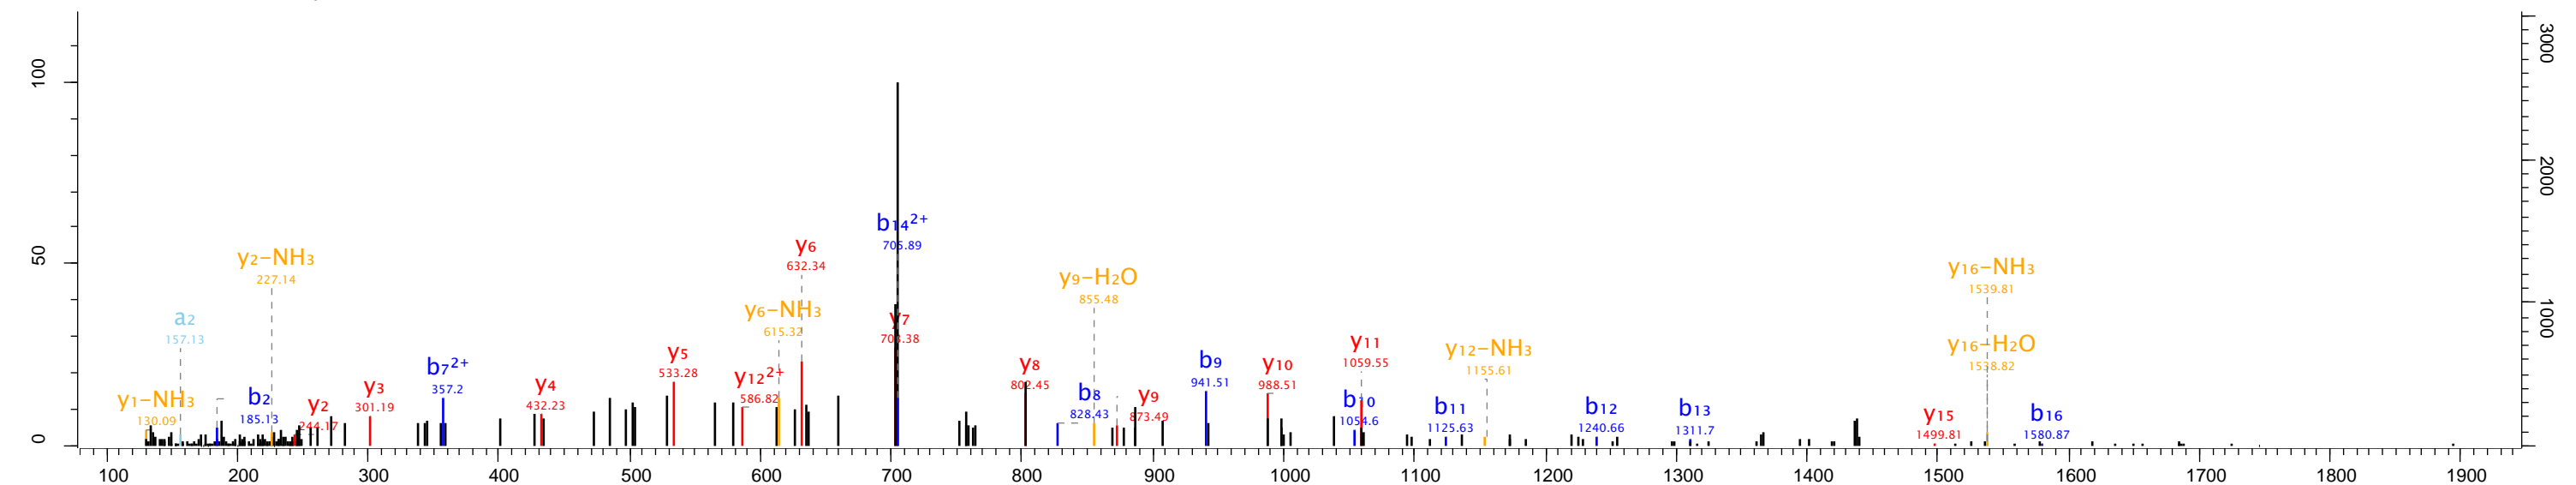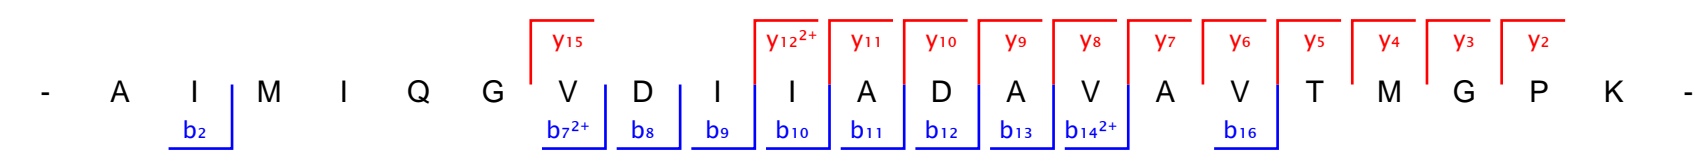

Spectral Annotation for Single-Peptide IDs in 16-cell Embryo using Q-OT-LIT

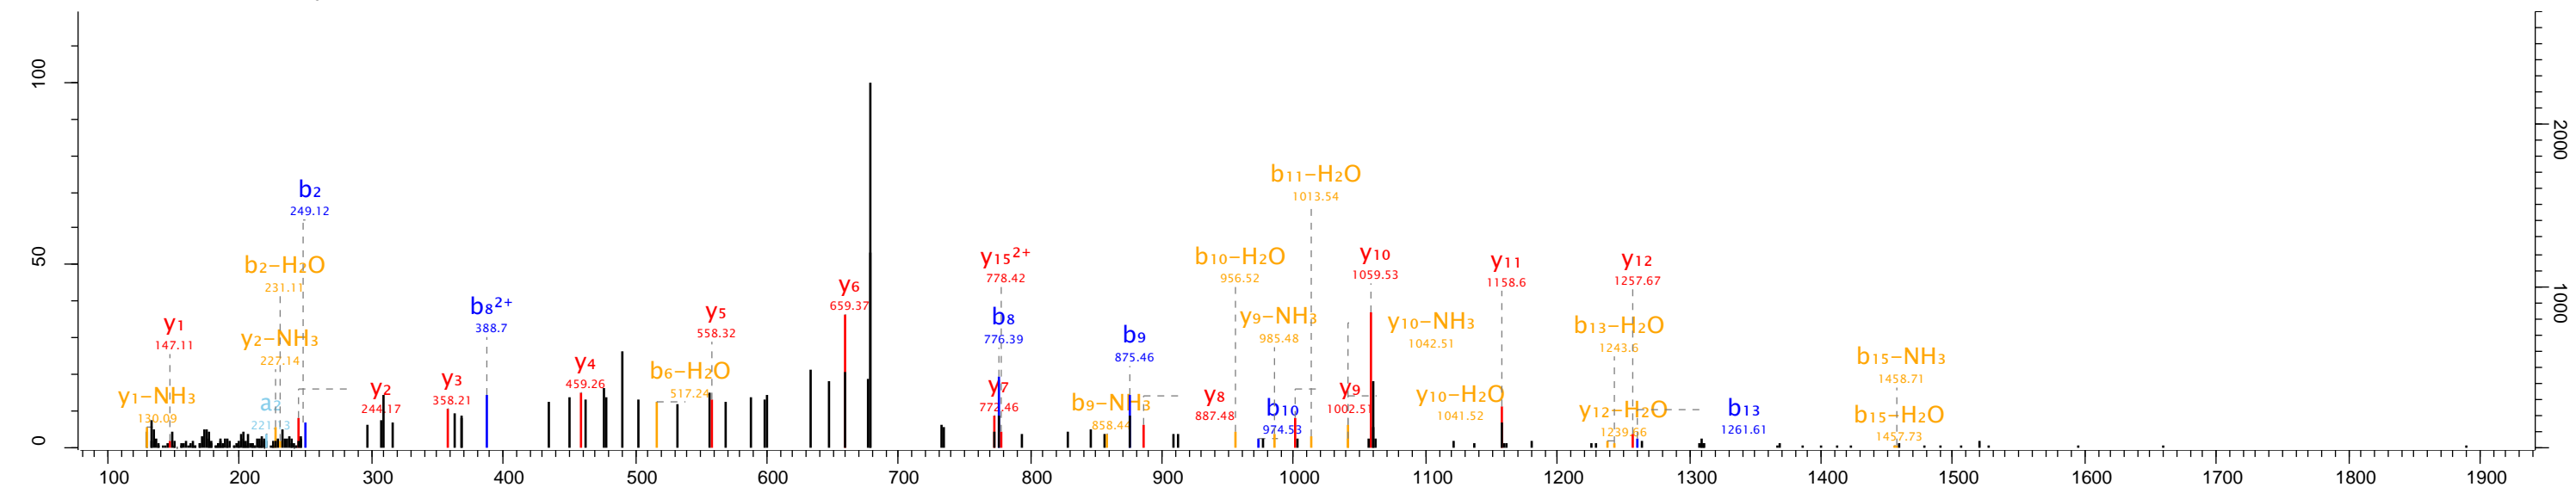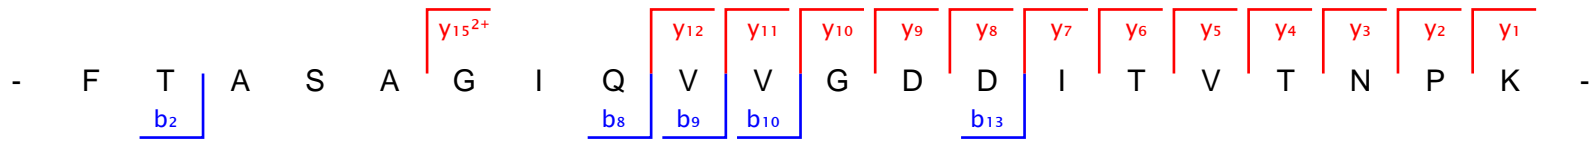

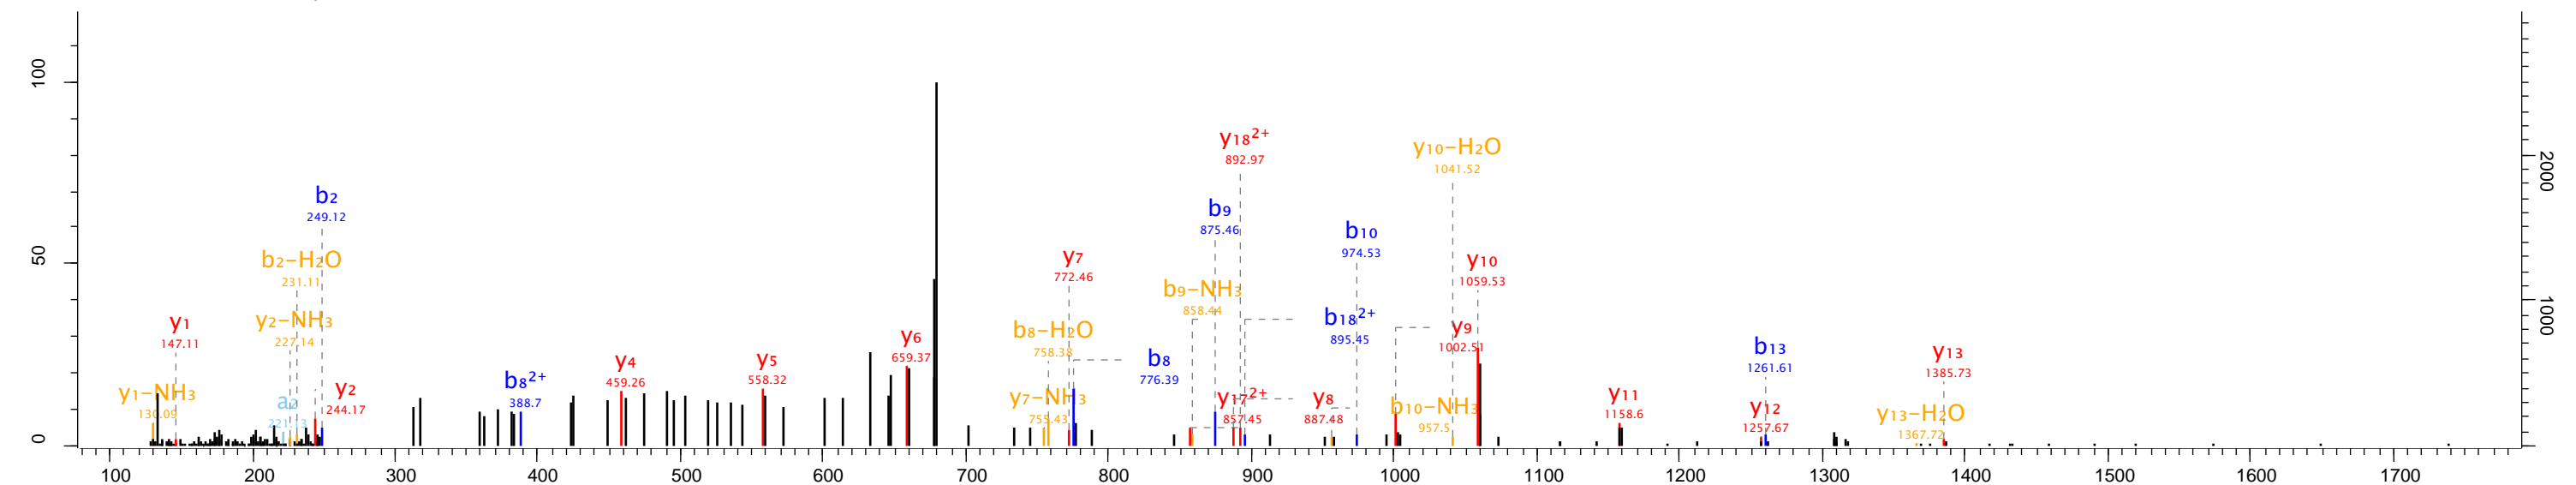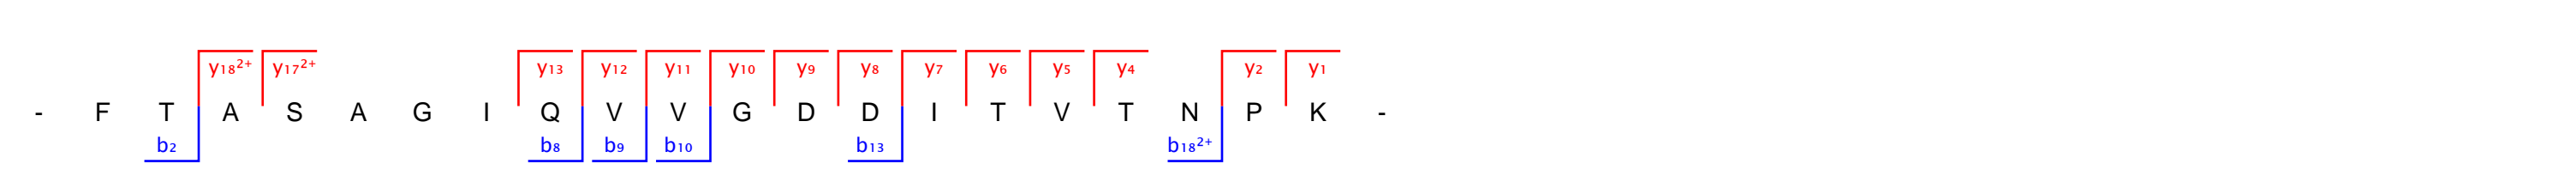

Raw file: 2015-01-05\_CL02\_2Excl15sMaxInj70  
 Scan: 22064 Method: ITMS; HCD Score: 55.44 m/z: 638.99

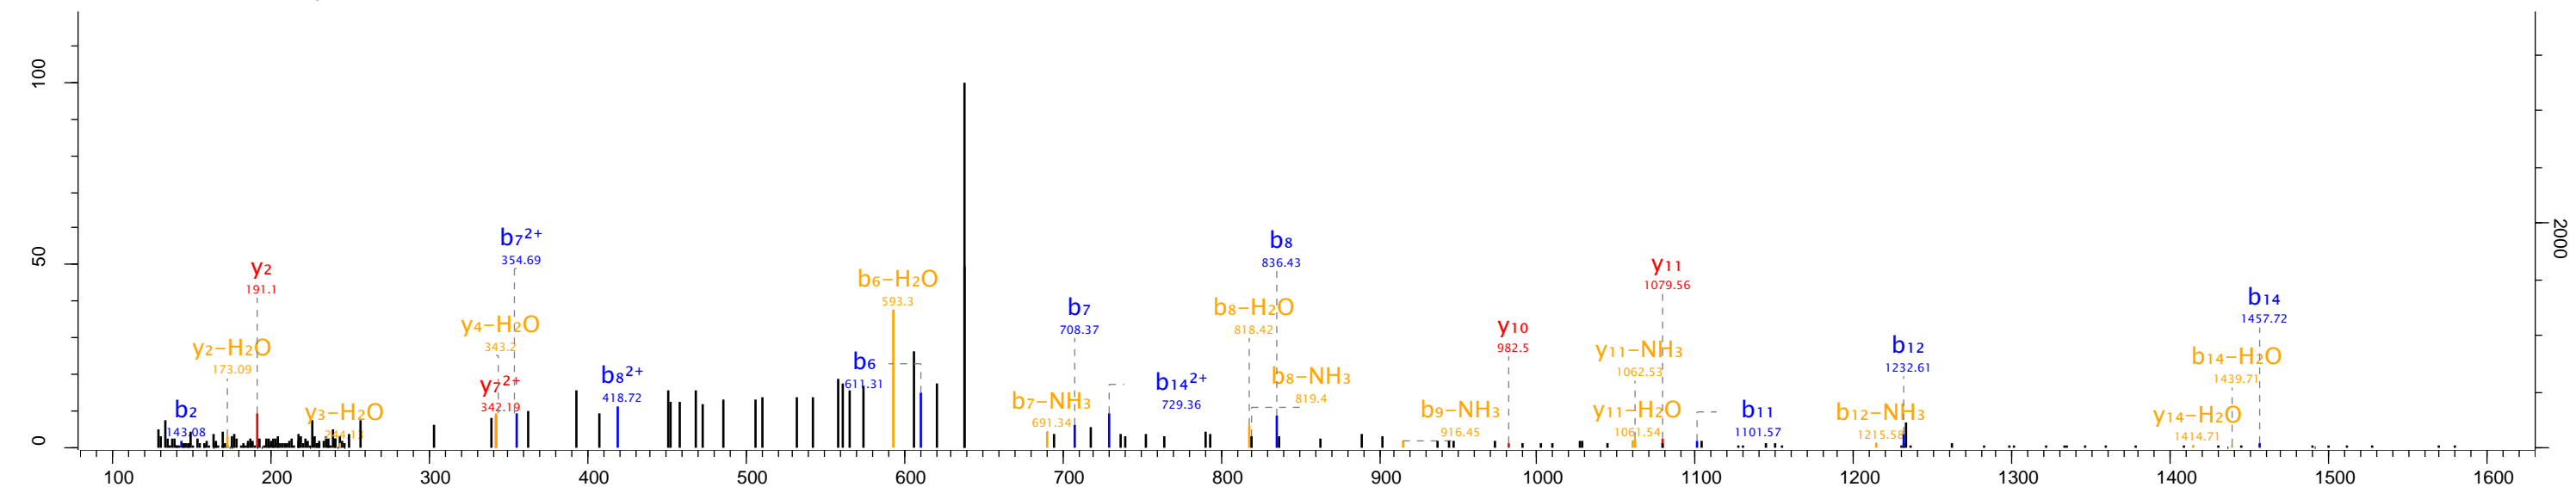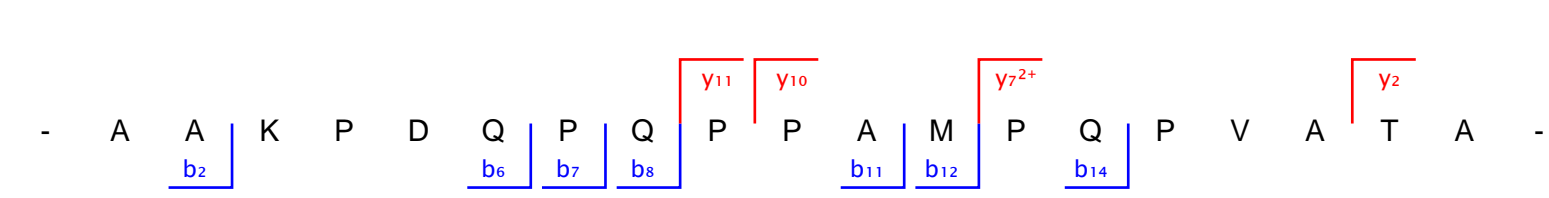

Spectral Annotation for Single-Peptide IDs in 16-cell Embryo using Q-OT-LIT

Raw file 2015-01-05\_CL02\_2Excl15sMaxInj70 Scan 22114 Method ITMS; HCD Score 51.09 m/z 639.33

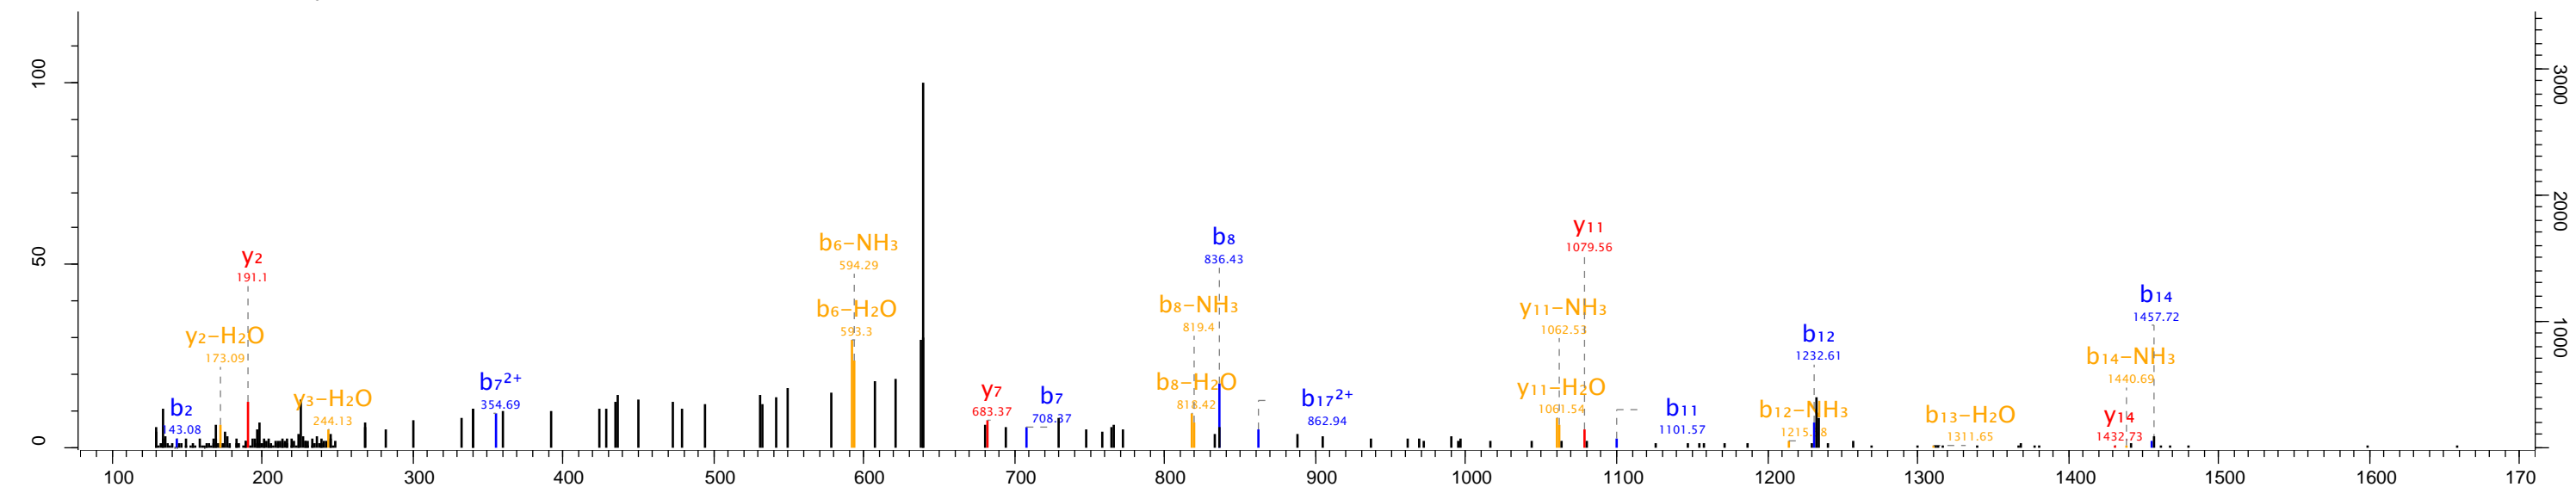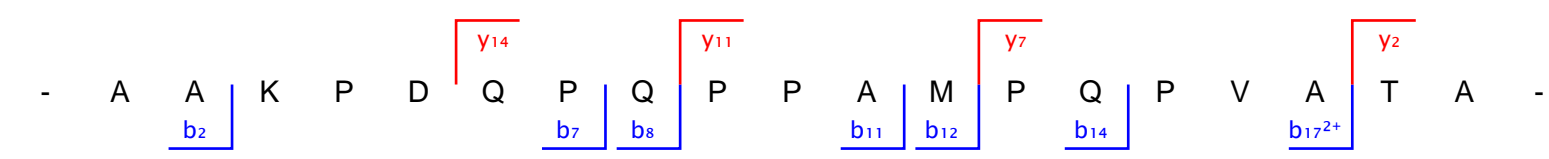

Raw file 2015-01-05\_CL02\_2Excl15sMaxInj70 Scan 22201 Method ITMS; HCD Score 69.58 m/z 1057.07

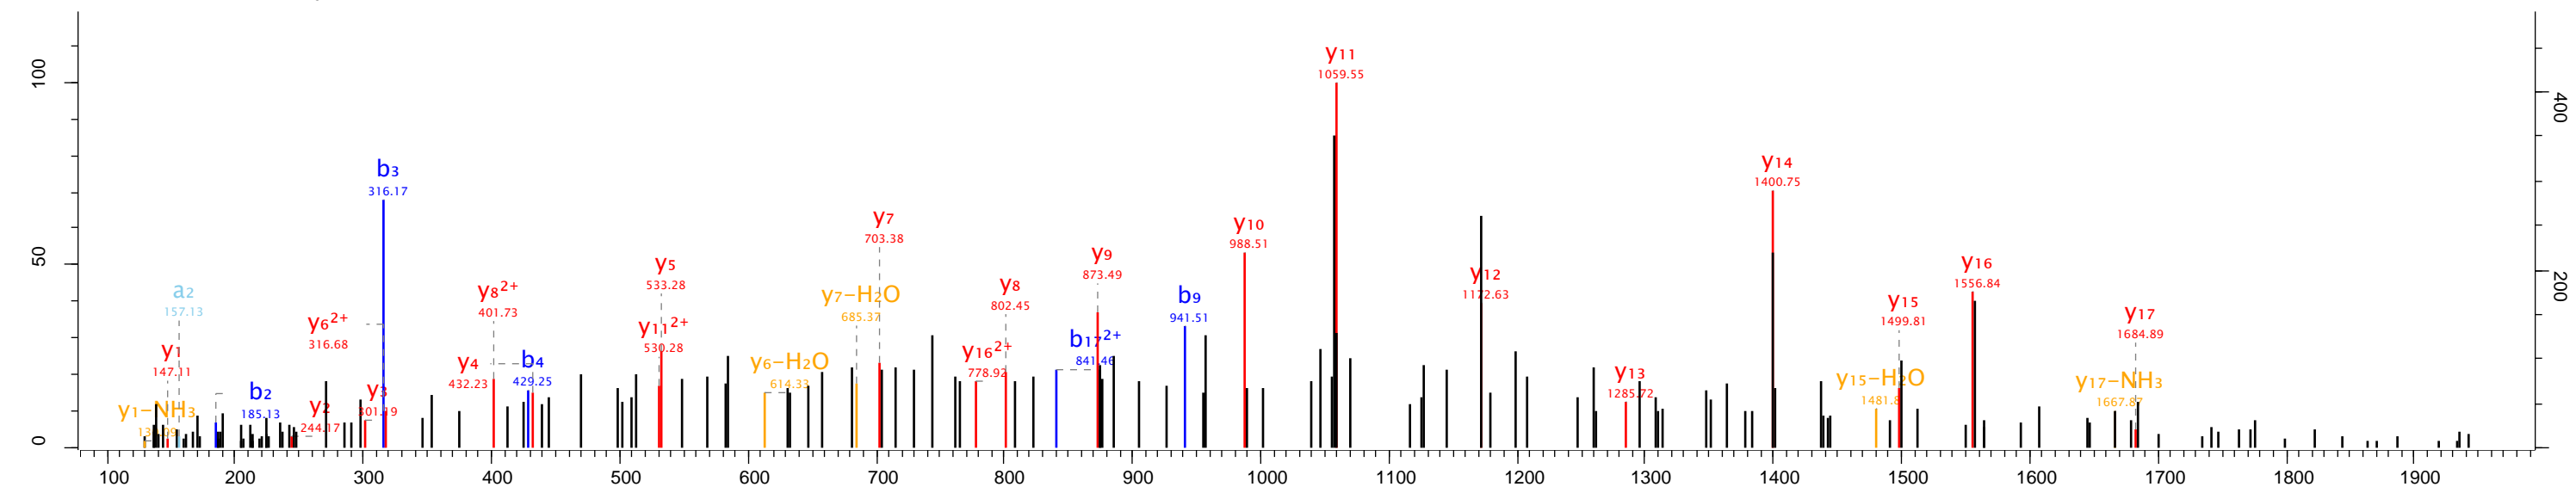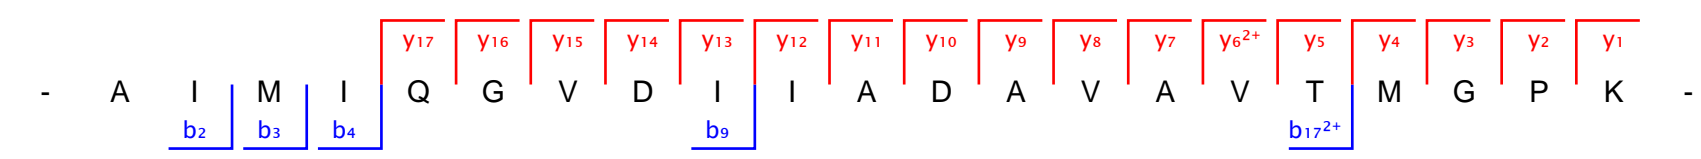

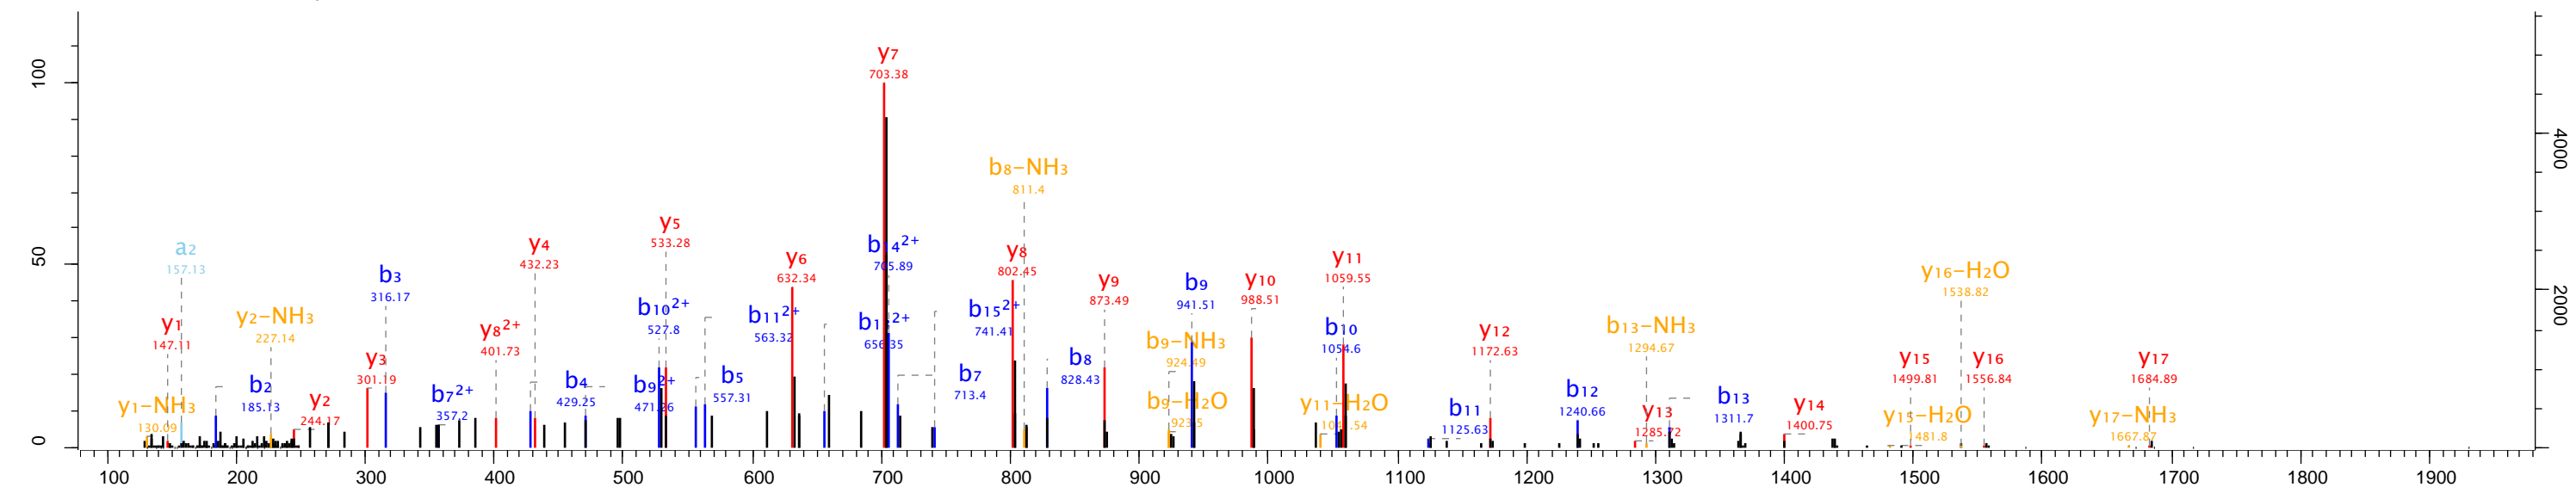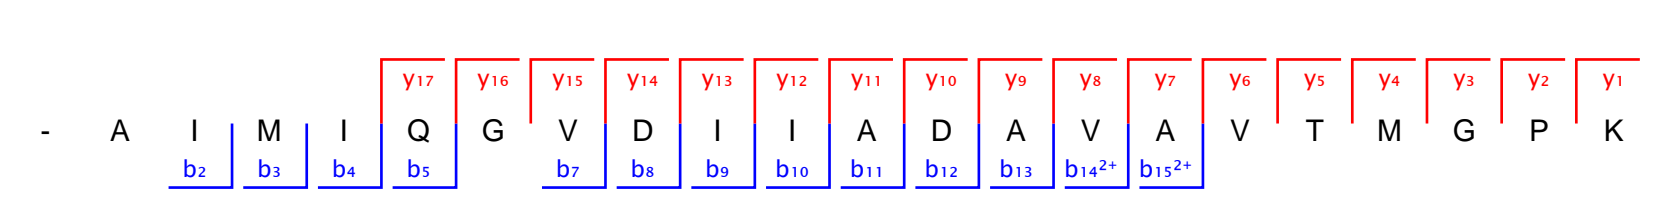



Raw file  
 2015-01-05\_CL02\_2Excl15sMaxInj70  
 Scan 22268 Method ITMS; HCD Score 69.19 m/z 639.33

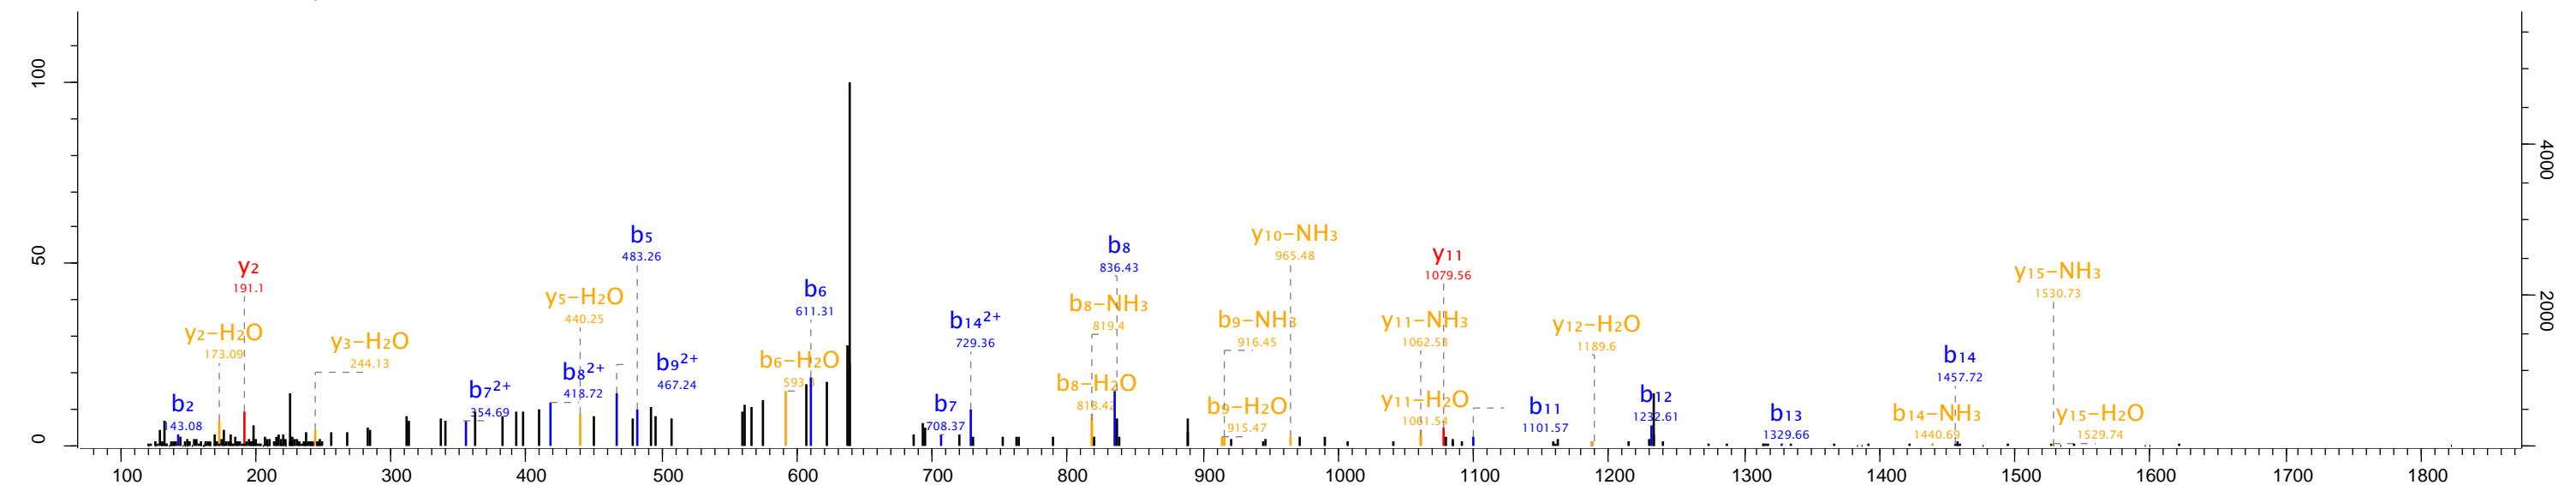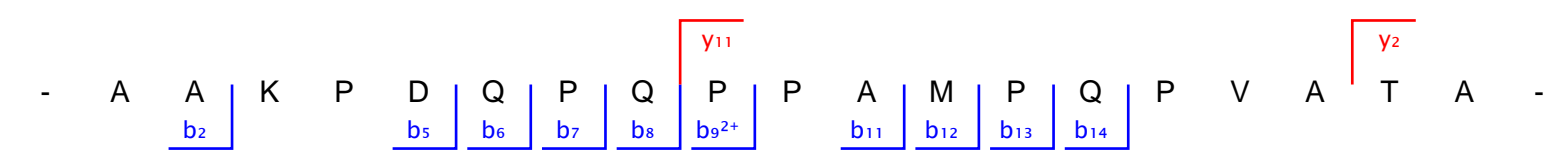

Spectral Annotation for Single-Peptide IDs in 16-cell Embryo using Q-OT-LIT

Raw file 2015-01-05\_CL02\_2Excl15sMaxInj70 Scan 22619 Method ITMS; HCD Score 40.95 m/z 780.35

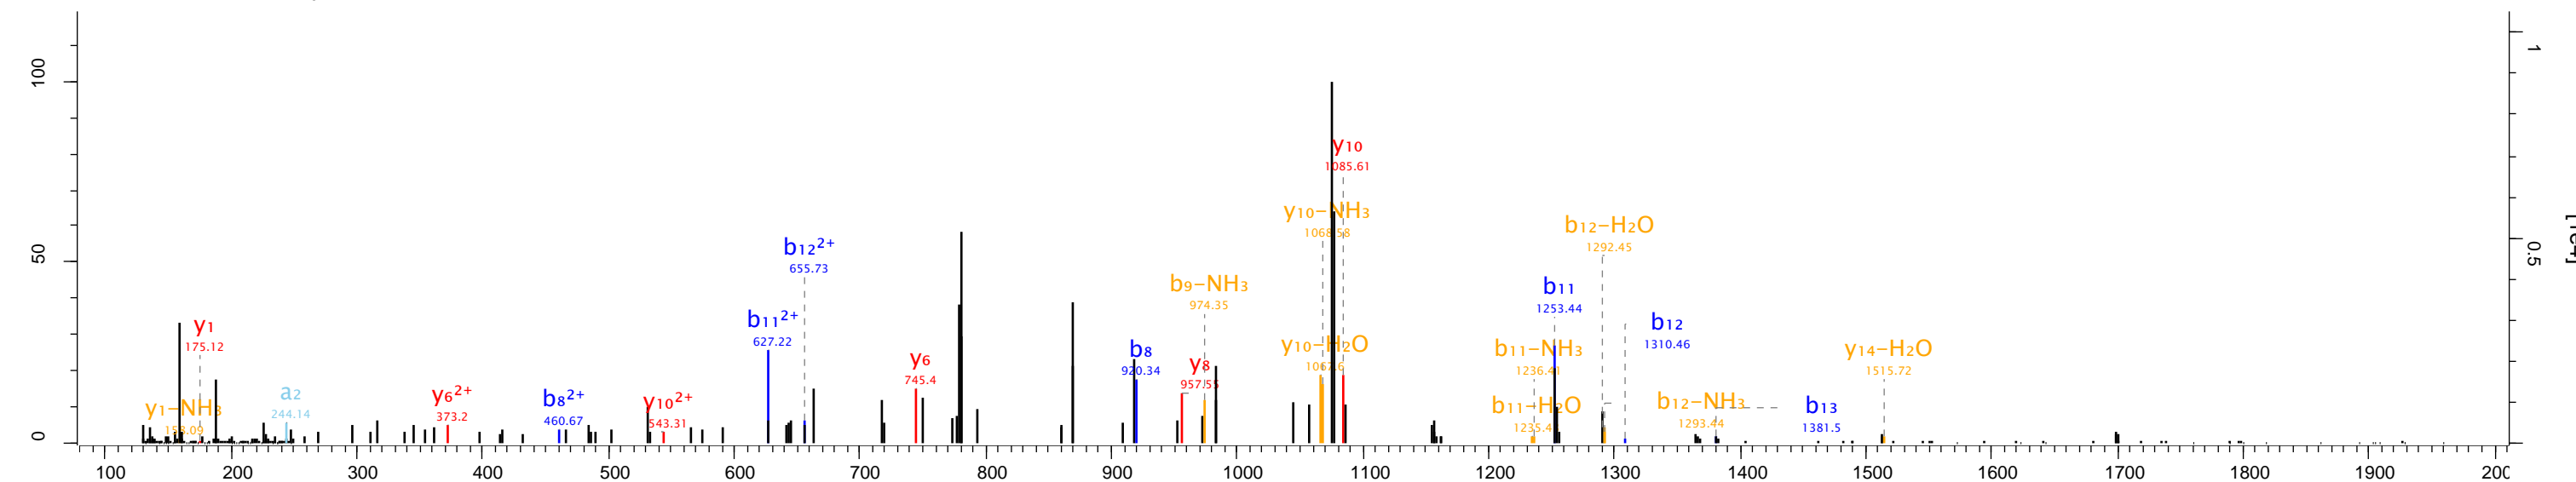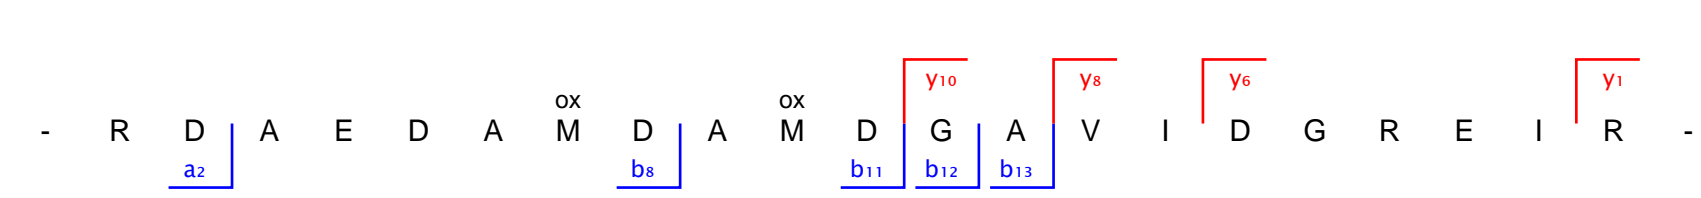

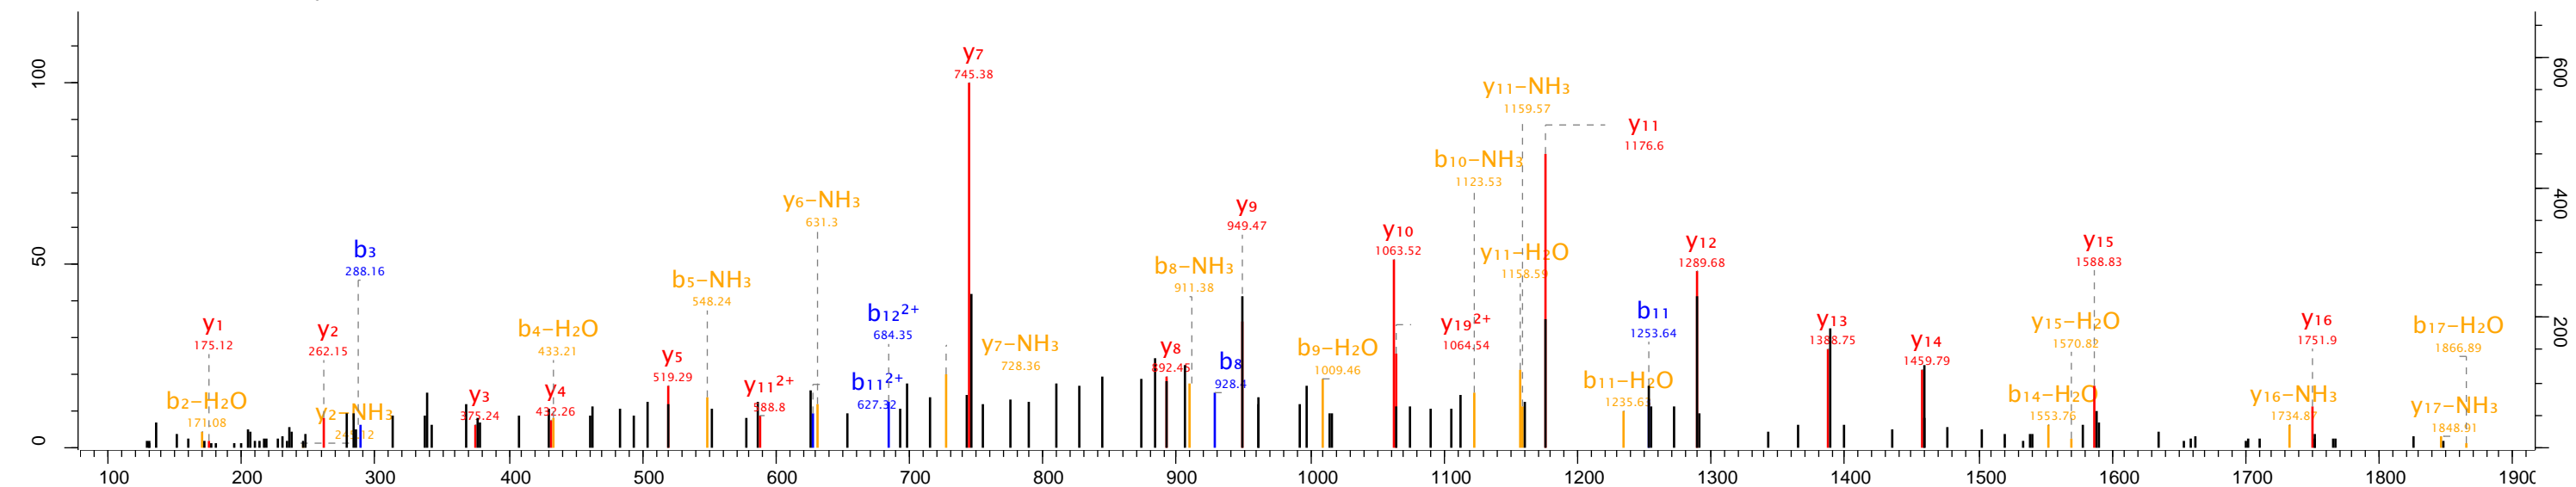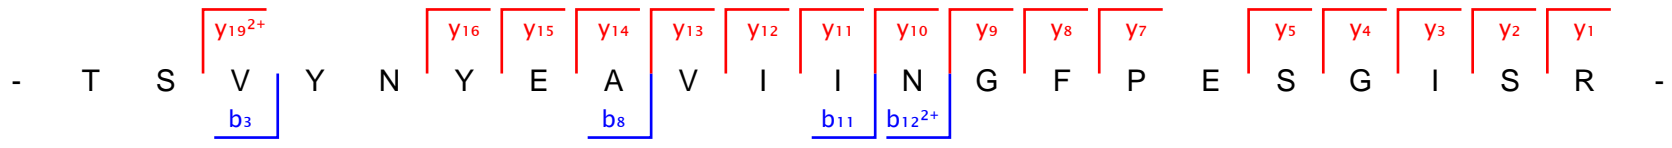

Raw file 2015-01-05\_CL02\_2Excl15sMaxInj70 Scan 22804 Method ITMS; HCD Score 52.77 m/z 730

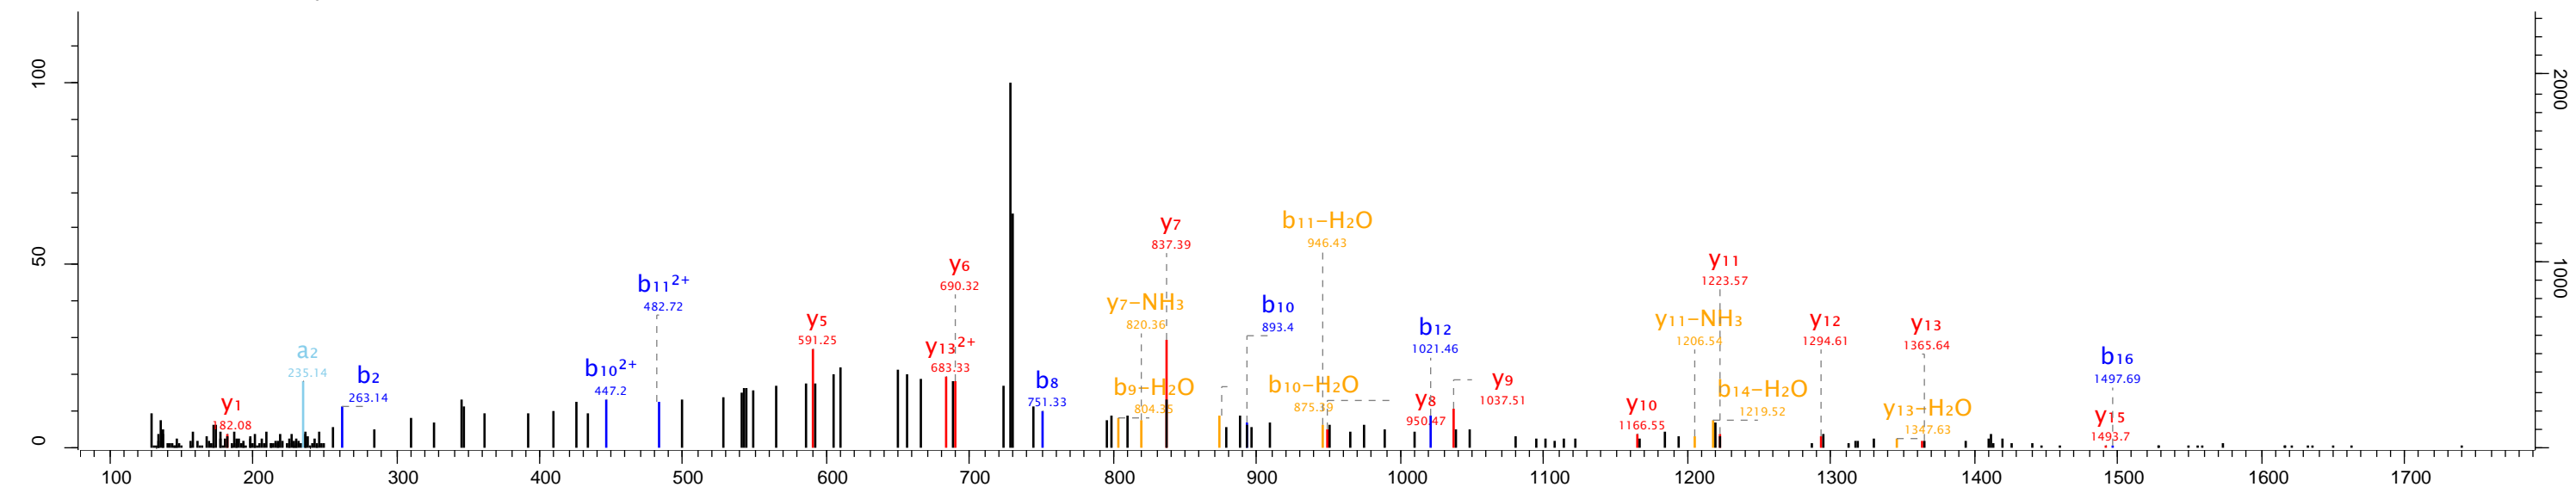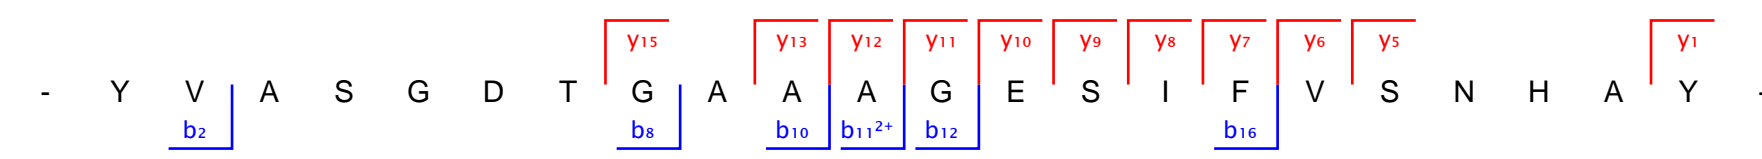

Raw file 2015-01-05\_CL02\_2Excl15sMaxInj70 Scan 22901 Method ITMS; HCD Score 34.84 m/z 730

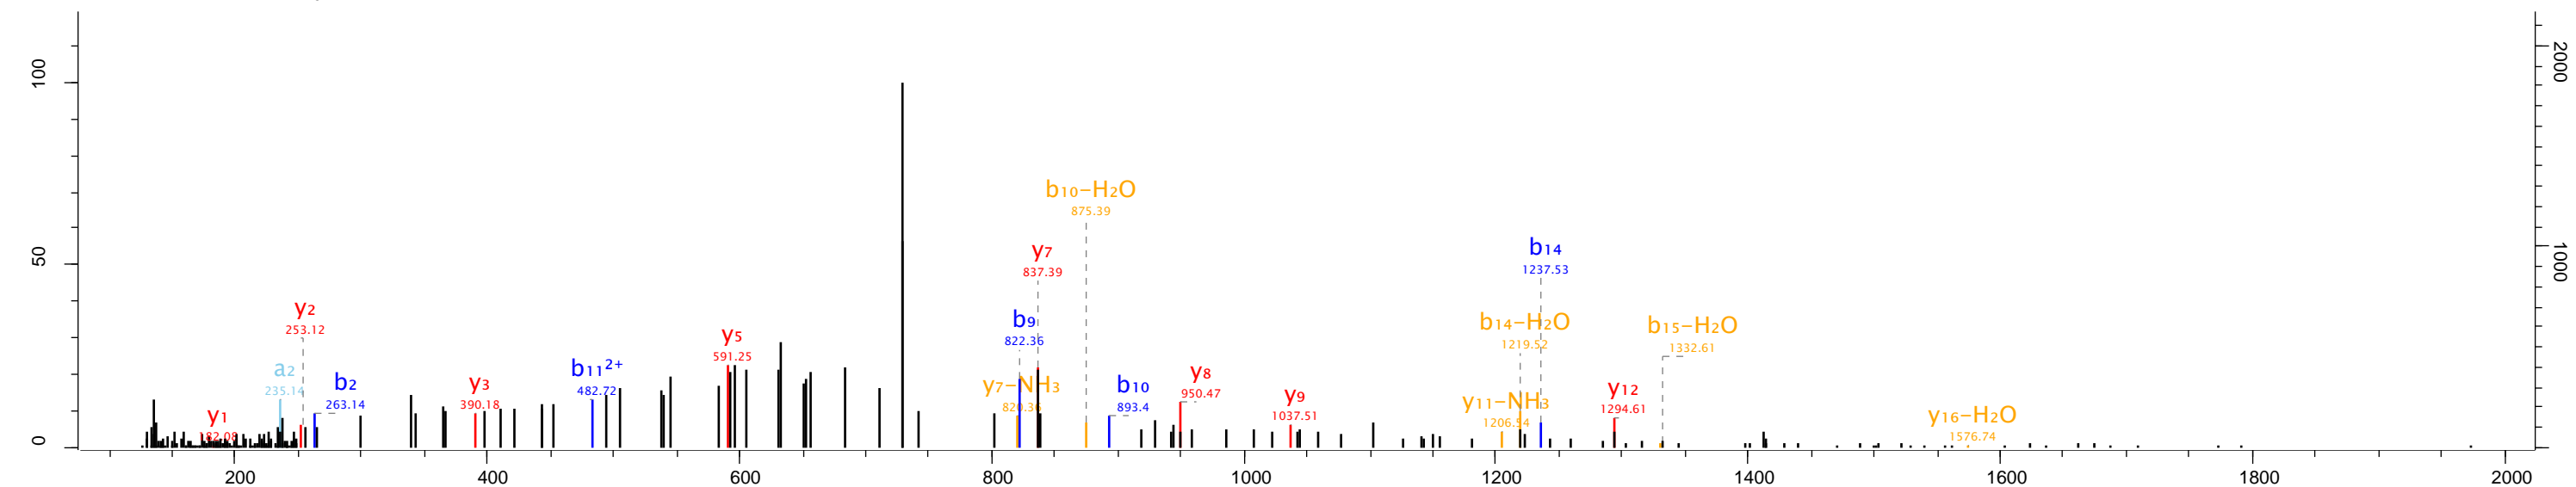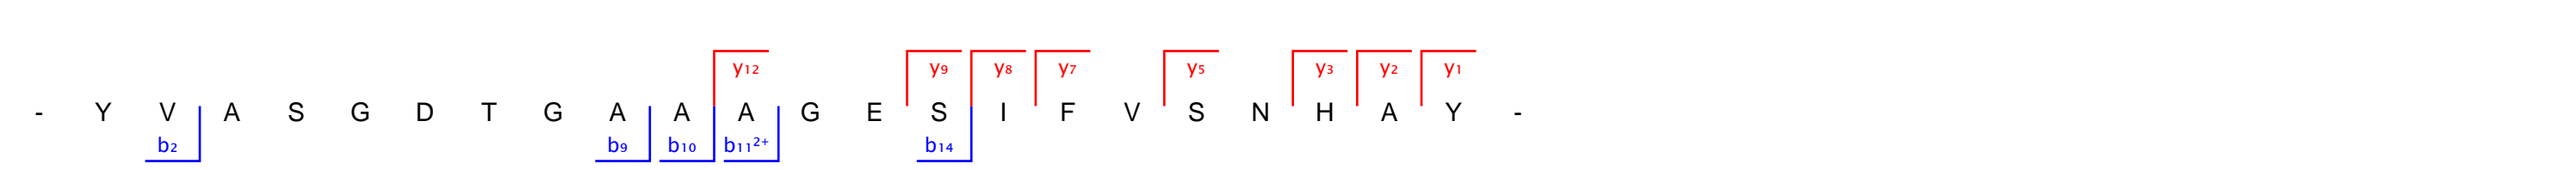

Raw file 2015-01-05\_CL02\_2Excl15sMaxInj70 Scan 23015 Method ITMS; HCD Score 51.3 m/z 758.05

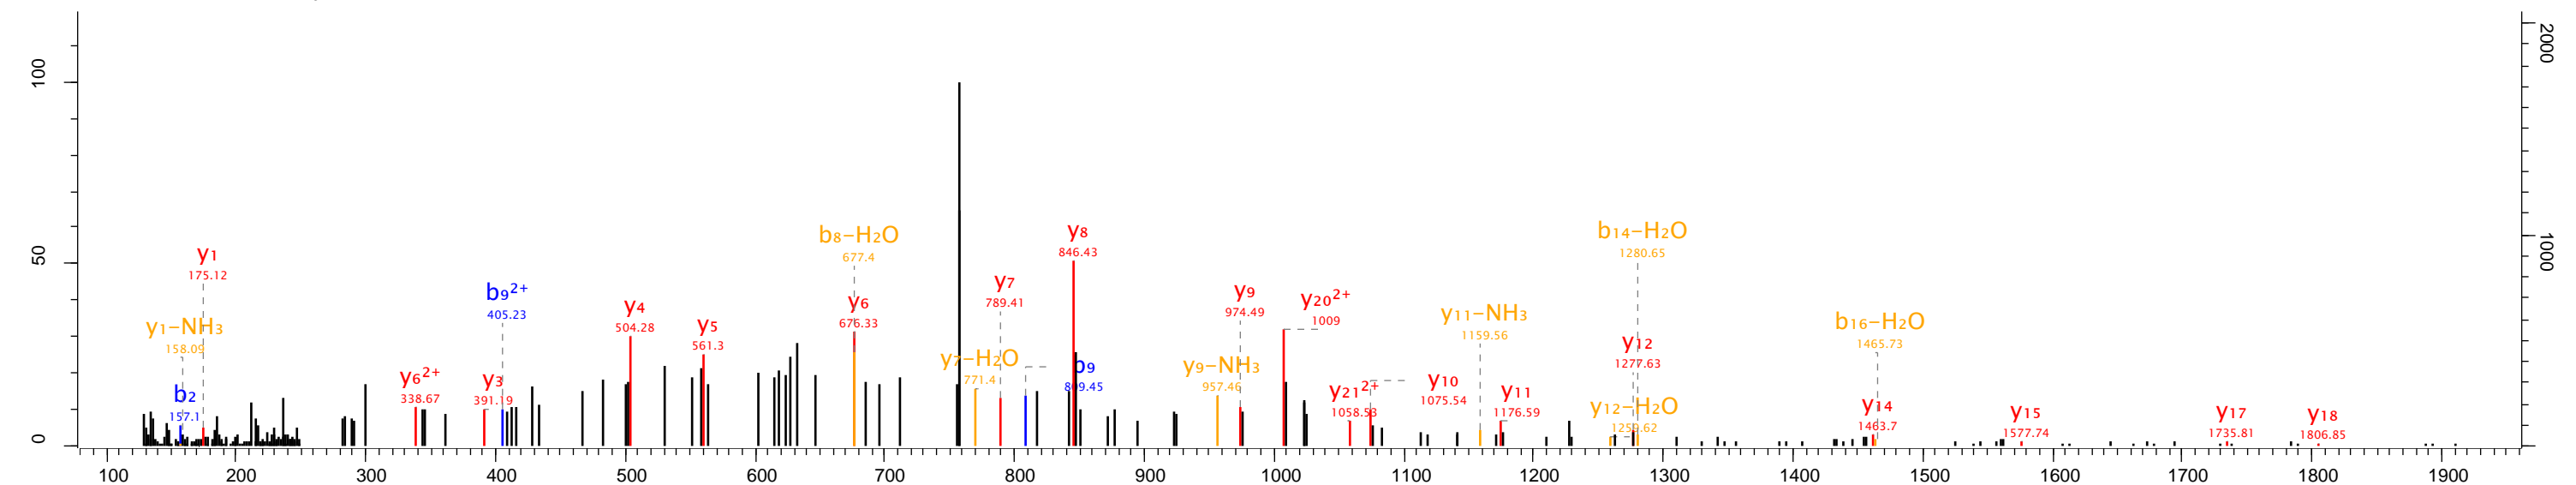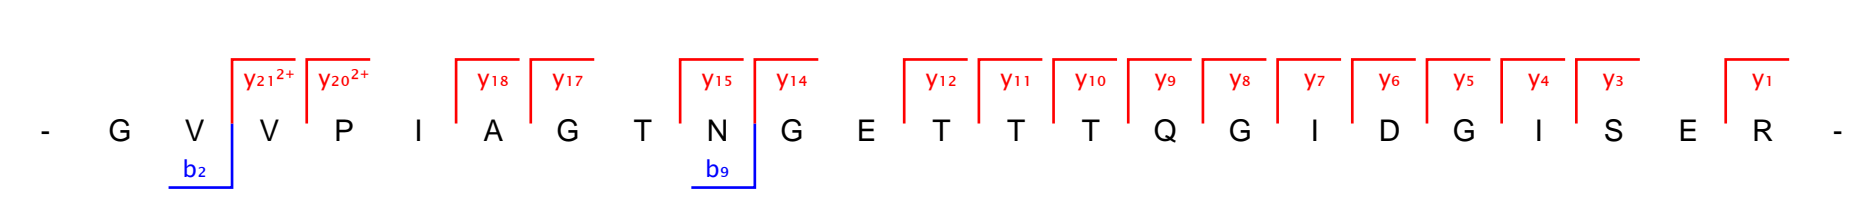

Raw file 2015-01-05\_CL02\_2Excl15sMaxInj70 Scan 23168 Method ITMS; HCD Score 52.32 m/z 791.07

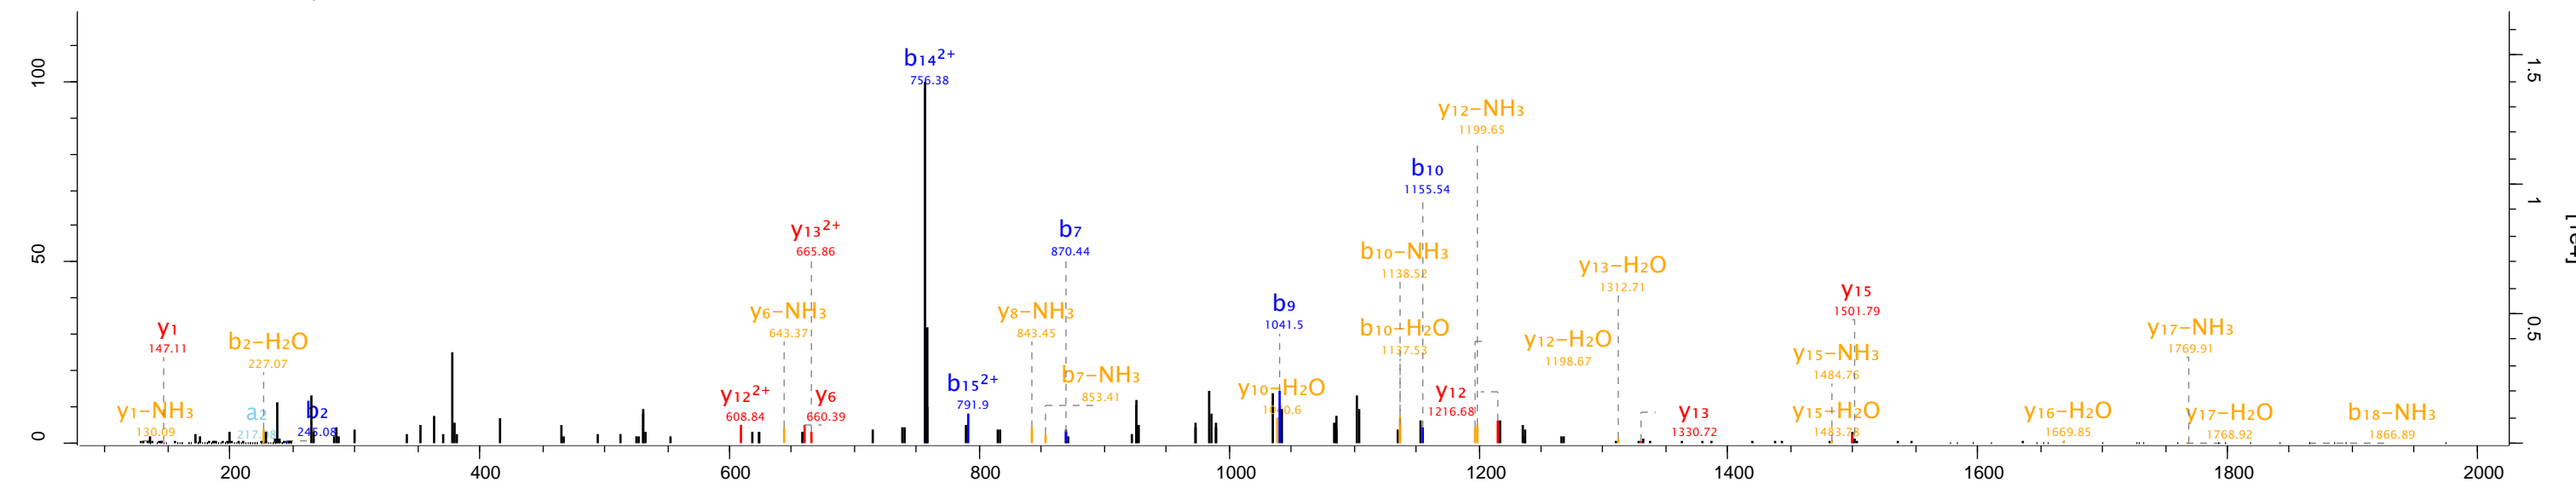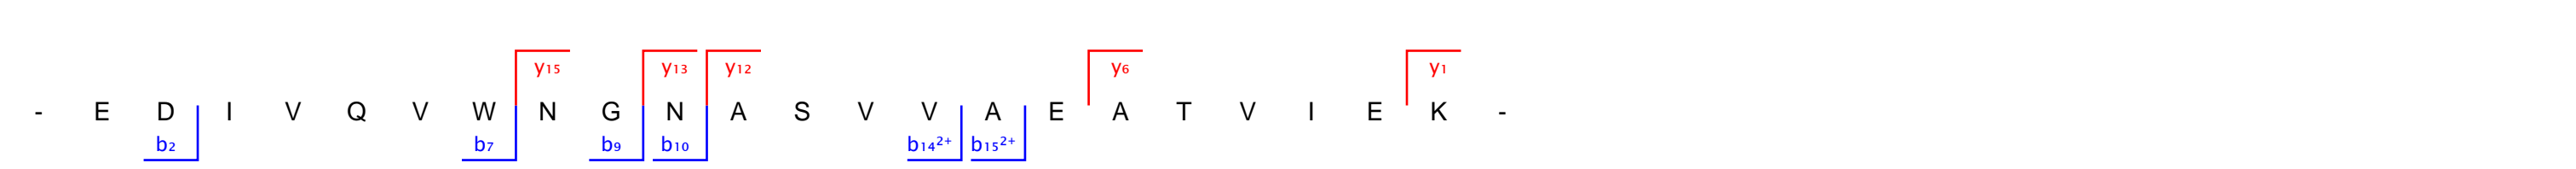

Spectral Annotation for Single-Peptide IDs in 16-cell Embryo using Q-OT-LIT

Raw file 2015-01-05\_CL02\_2Excl15sMaxInj70 Scan 24538 Method ITMS; HCD Score 55.17 m/z 832.05

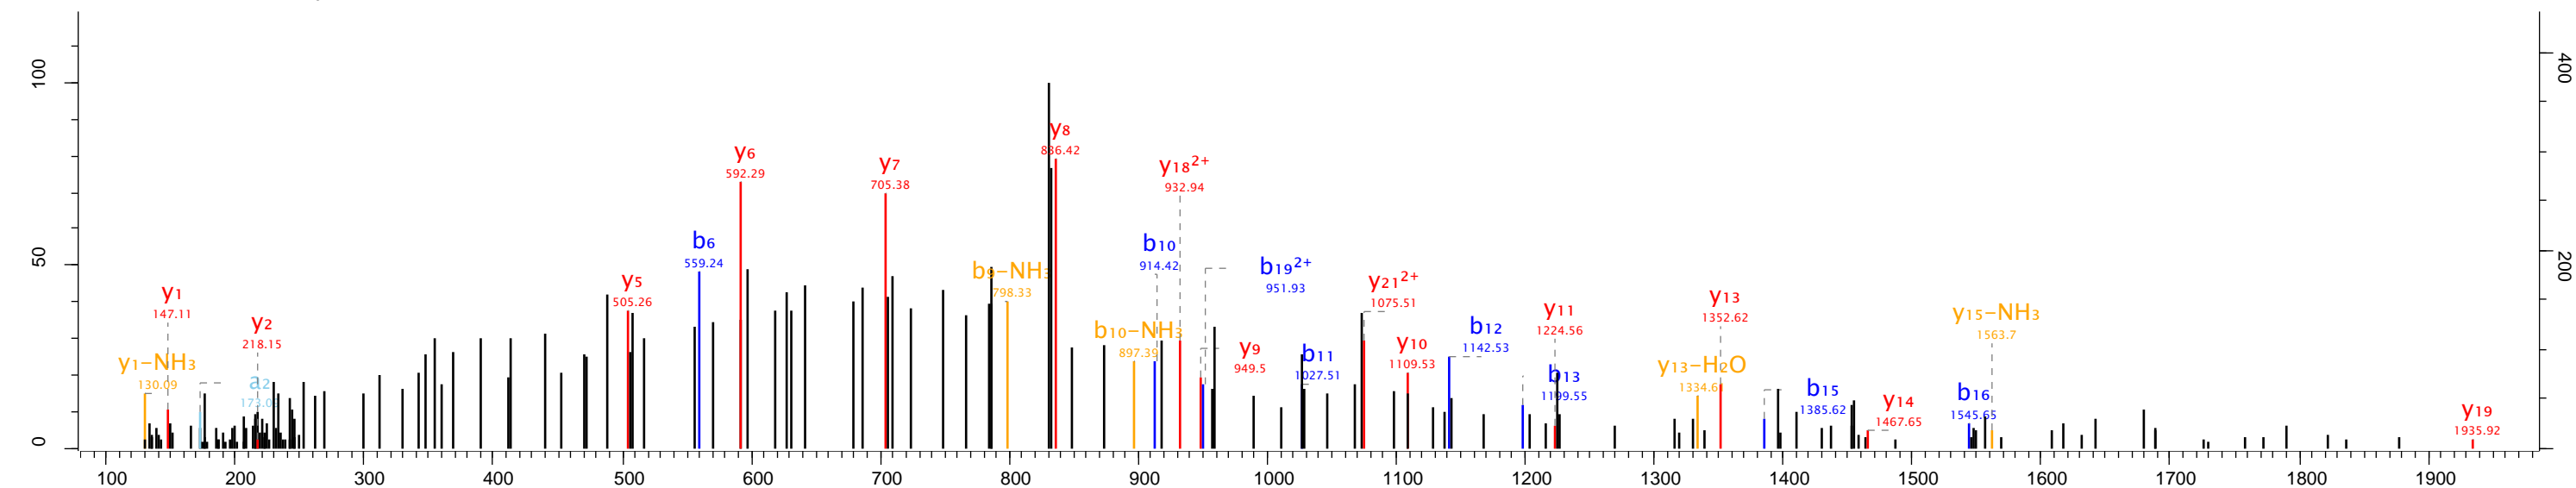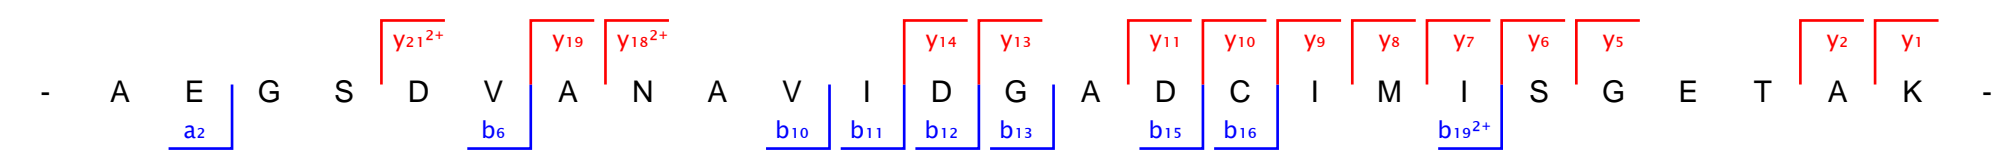



Raw file 2015-01-05\_CL02\_2Excl15sMaxInj70 Scan 24541 Method ITMS; HCD Score 80.41 m/z 858.08

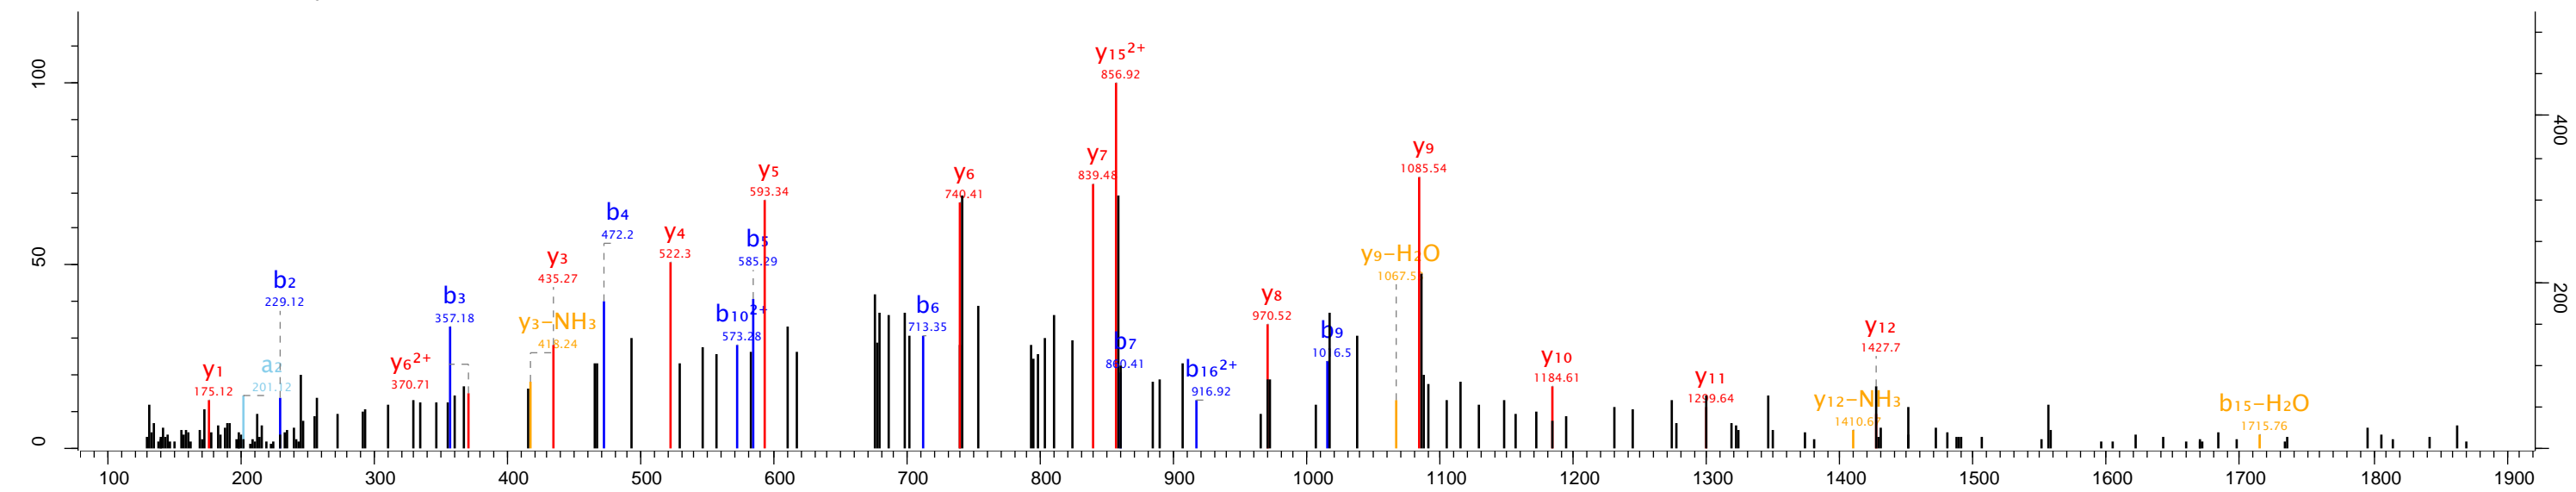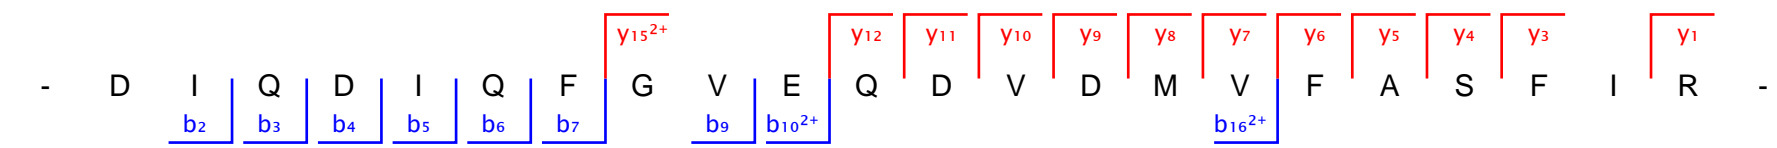

Spectral Annotation for Single-Peptide IDs in 16-cell Embryo using Q-OT-LIT

Raw file 2015-01-05\_CL02\_2Excl15sMaxInj70 Scan 24566 Method ITMS; HCD Score 76.05 m/z 858.08

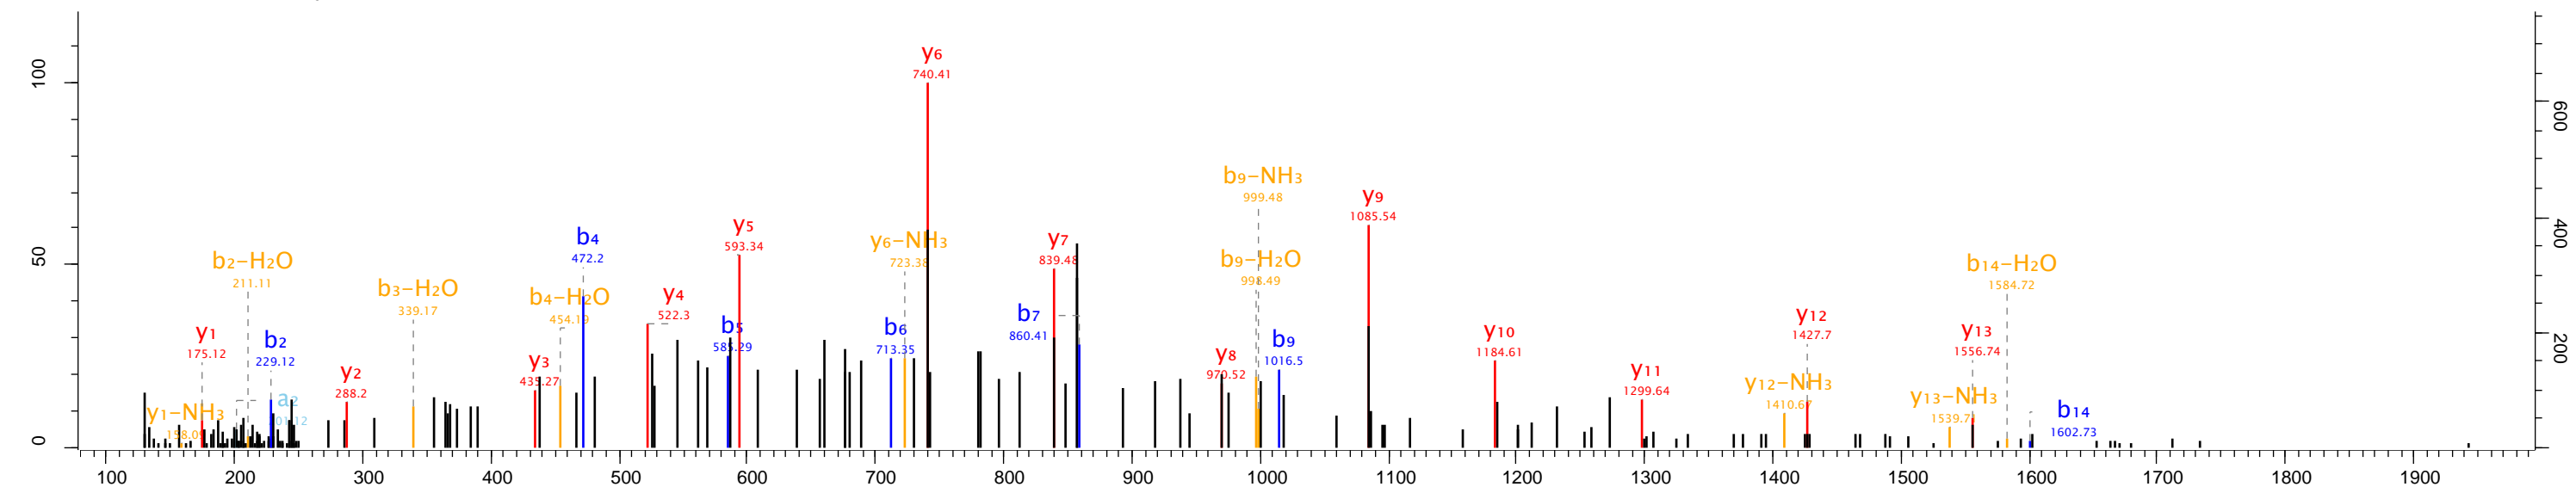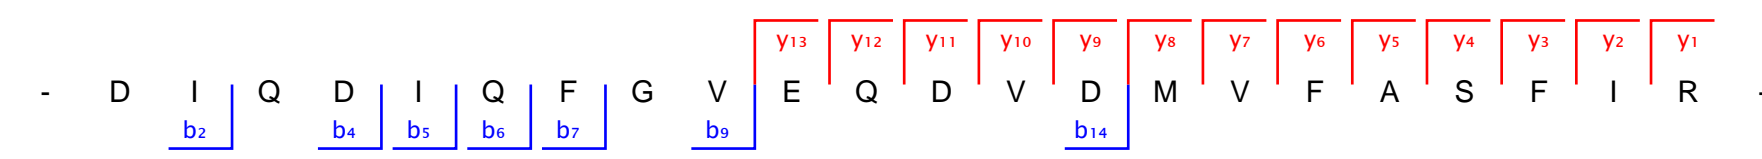

Spectral Annotation for Single-Peptide IDs in 16-cell Embryo using Q-OT-LIT

Raw file: 2015-01-05\_CL02\_2Excl15sMaxInj70  
 Scan: 24765 Method: ITMS; HCD Score: 50.19 m/z: 858.08

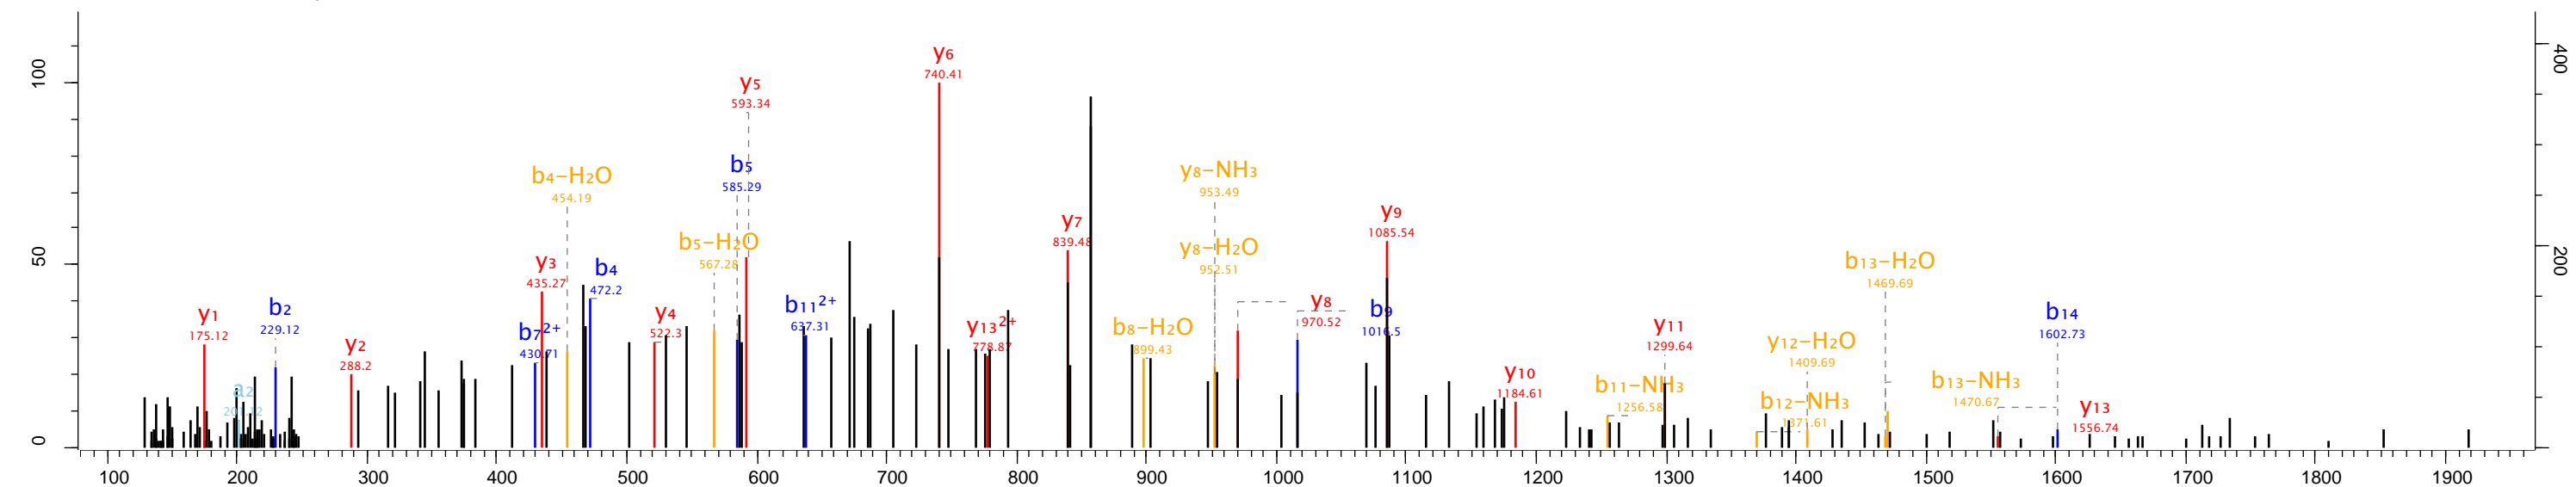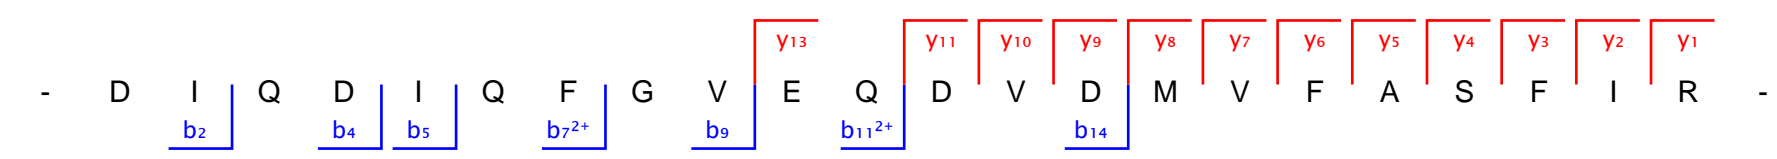

Raw file 2015-01-05\_CL02\_2Excl15sMaxInj70 Scan 25007 Method ITMS; HCD Score 66.02 m/z 854.75

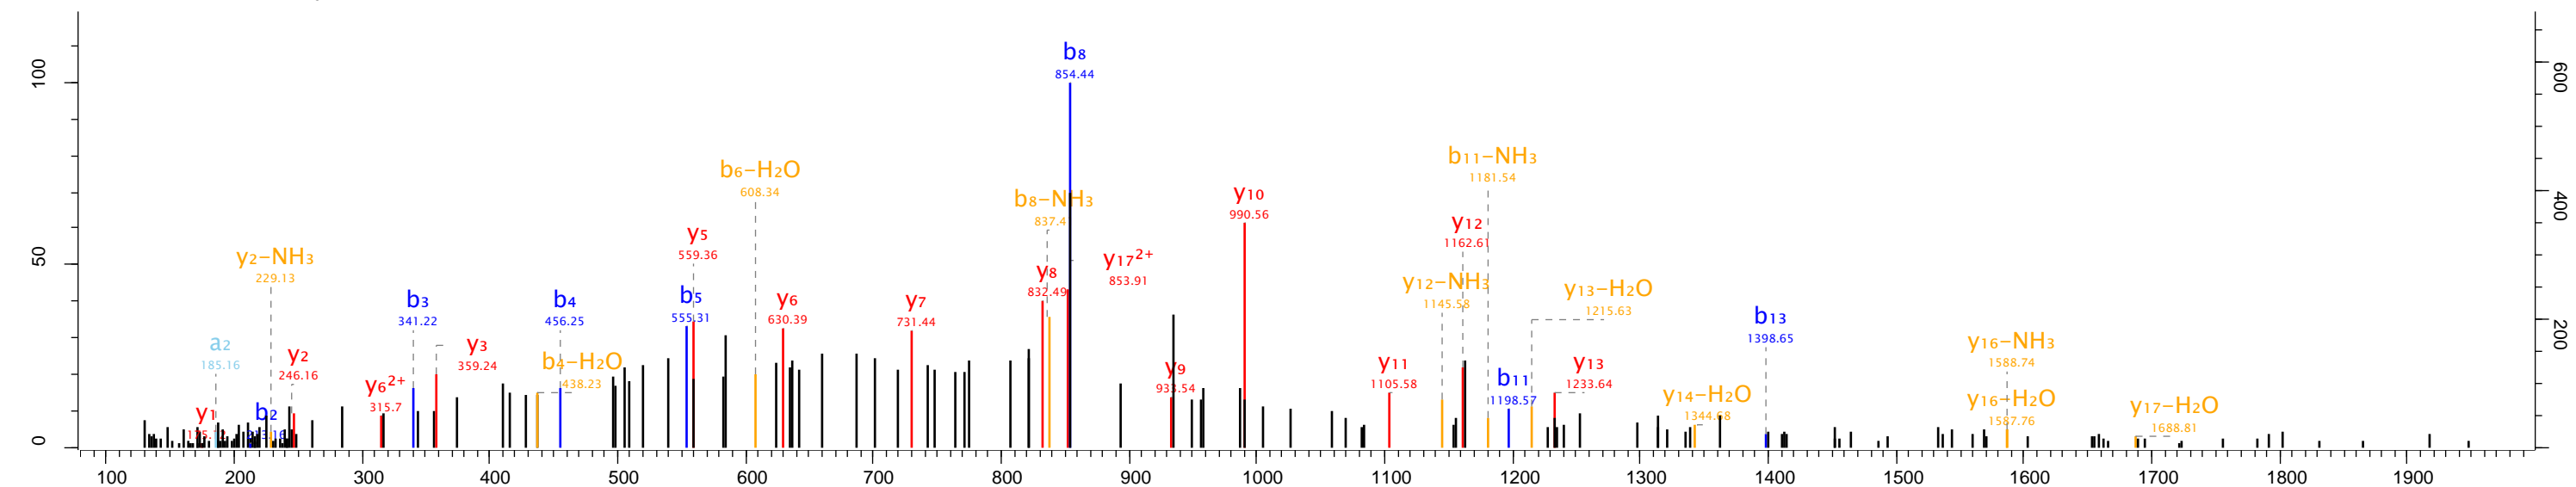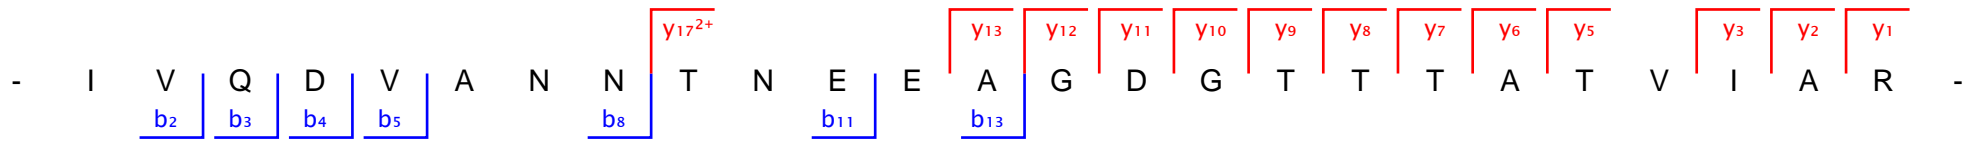

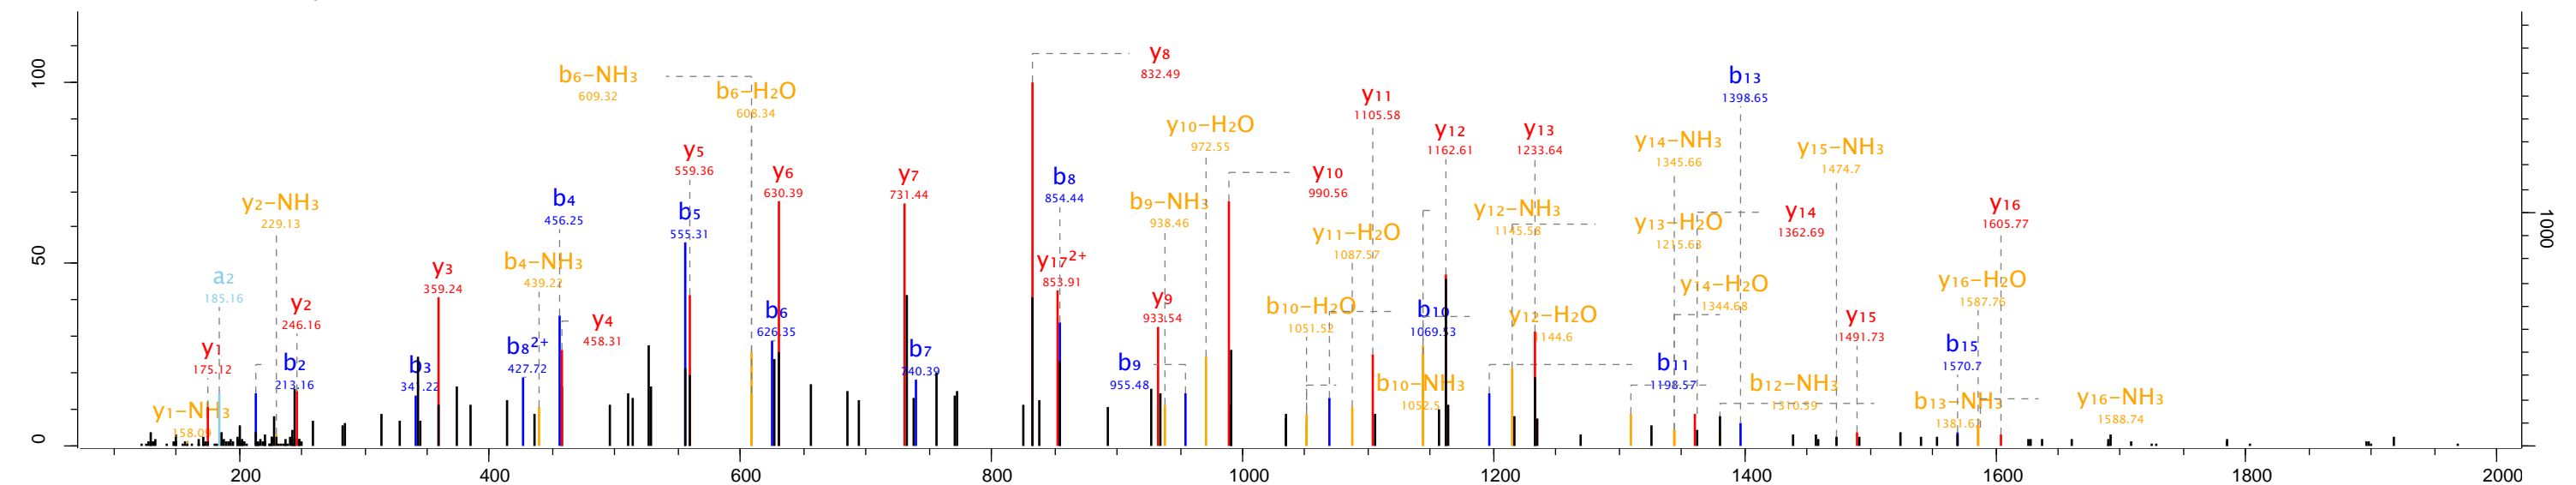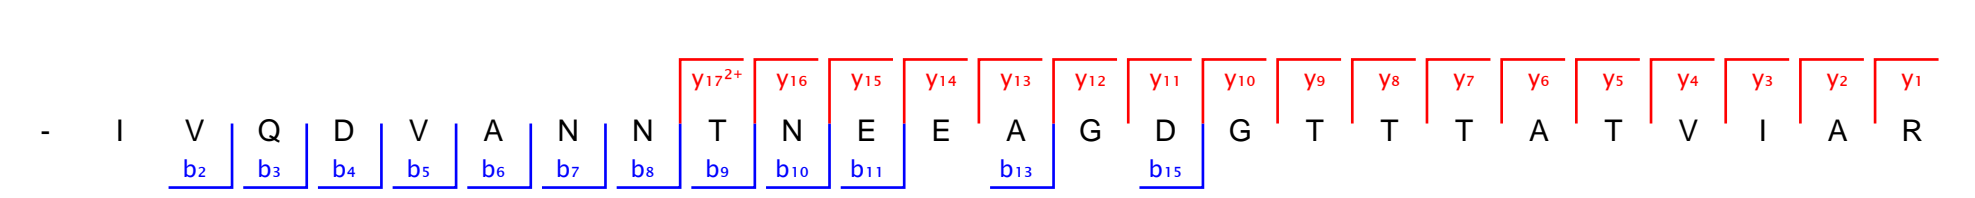

Raw file: 2015-01-05\_CL02\_2Excl15sMaxInj70  
 Scan: 25225 Method: ITMS; HCD Score: 198.54 m/z: 854.42

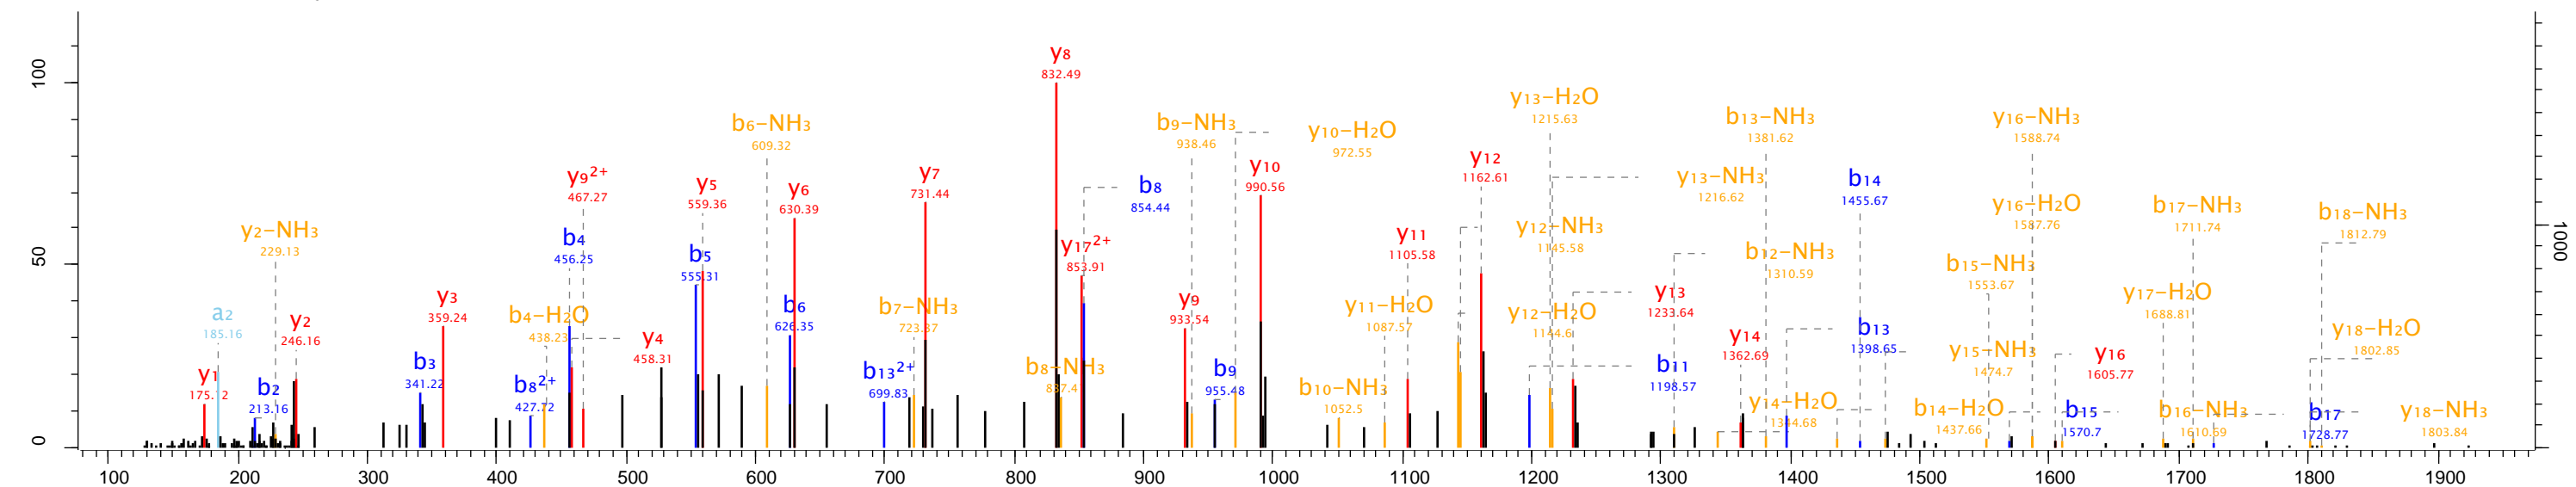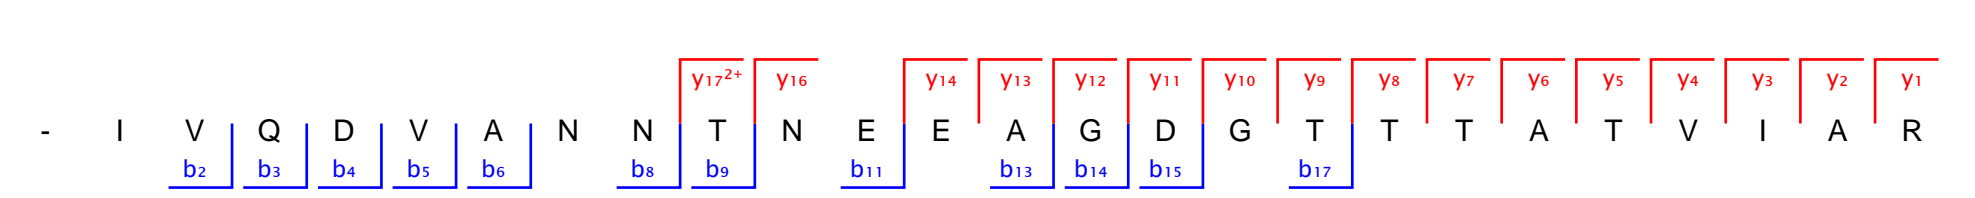

Raw file: 2015-01-05\_CL02\_2Excl15sMaxInj70  
 Scan: 25229 Method: ITMS; HCD Score: 201.79 m/z: 854.42

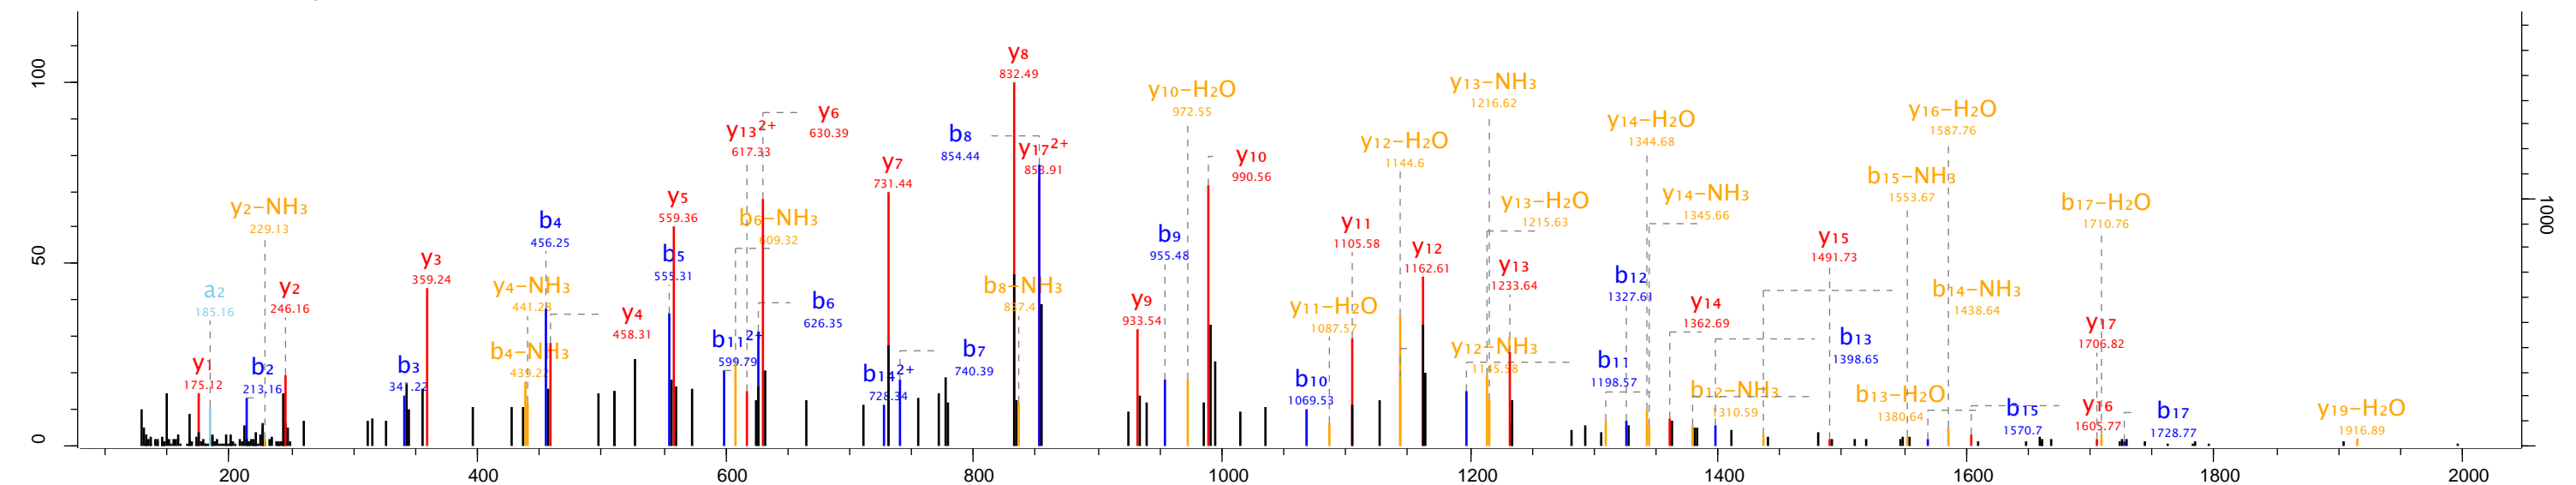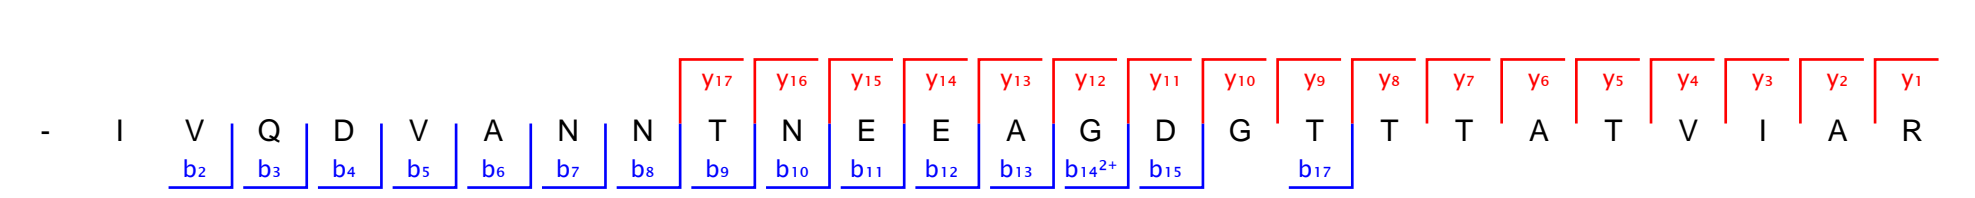

Raw file  
 2015-01-05\_CL02\_2Excl15sMaxInj70  
 Scan 27783 Method ITMS; HCD Score 29.95 m/z 1128.81

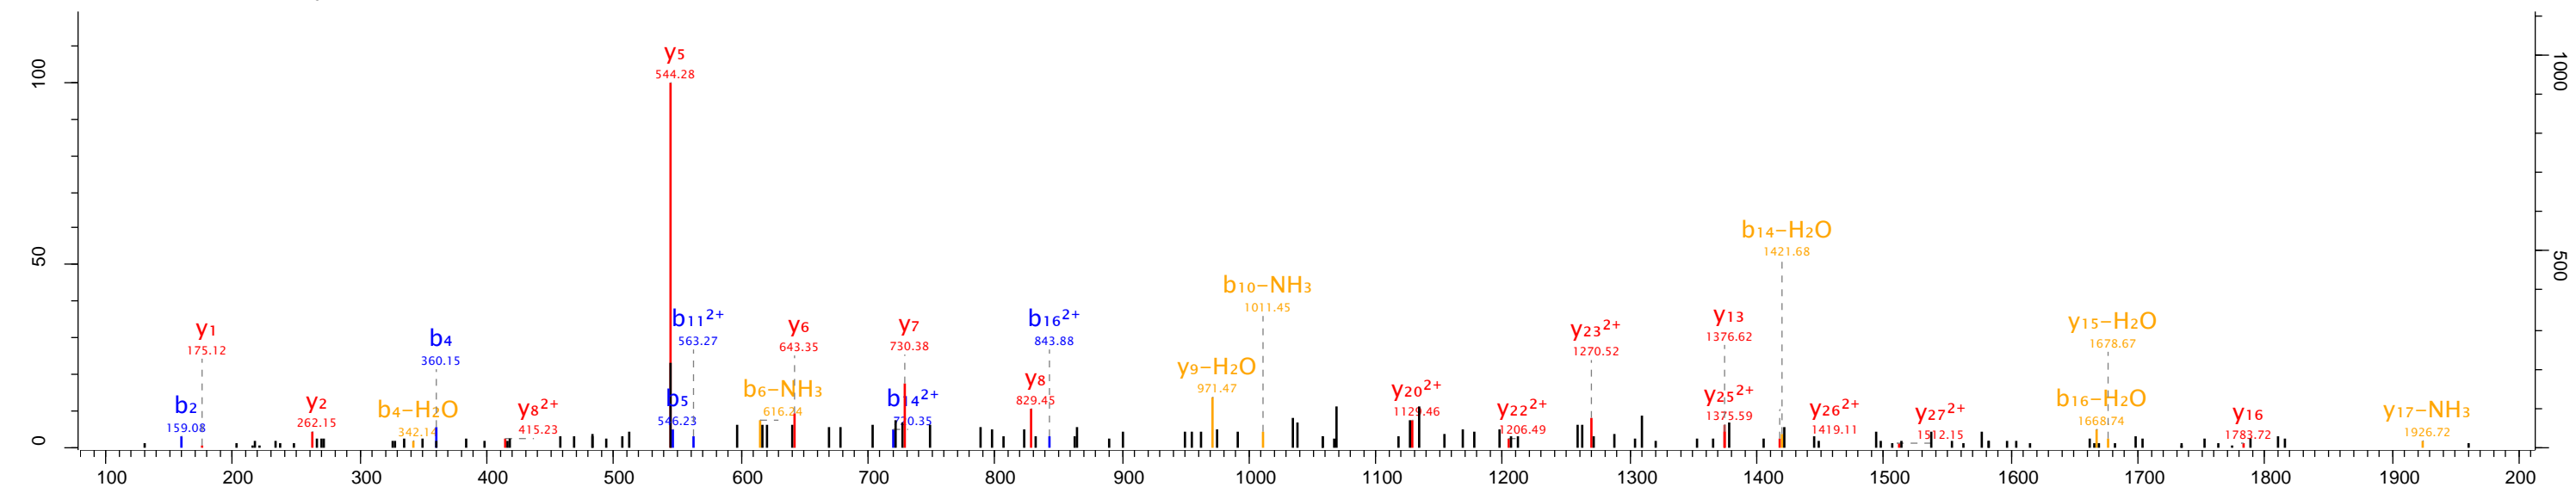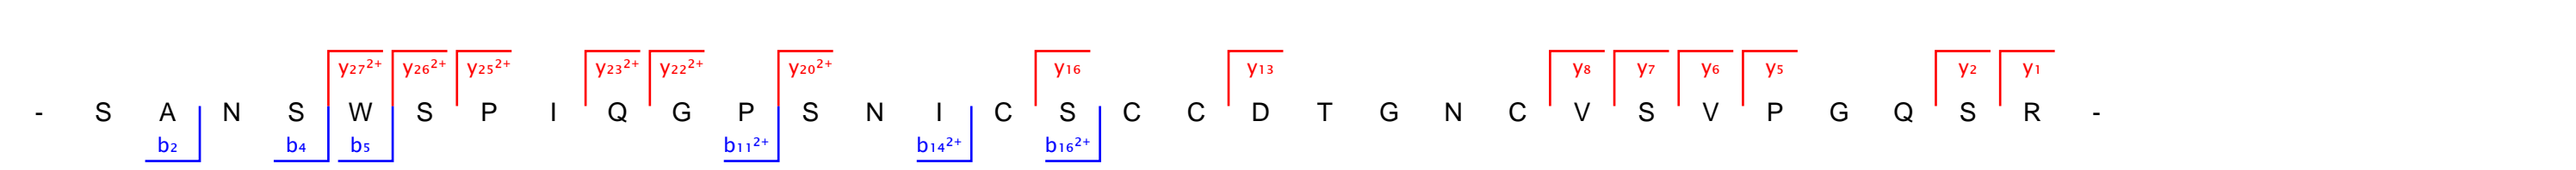



Raw file 2015-01-05\_CL02\_2Excl15sMaxInj70 Scan 27806 Method ITMS; HCD Score 33.25 m/z 1128.48

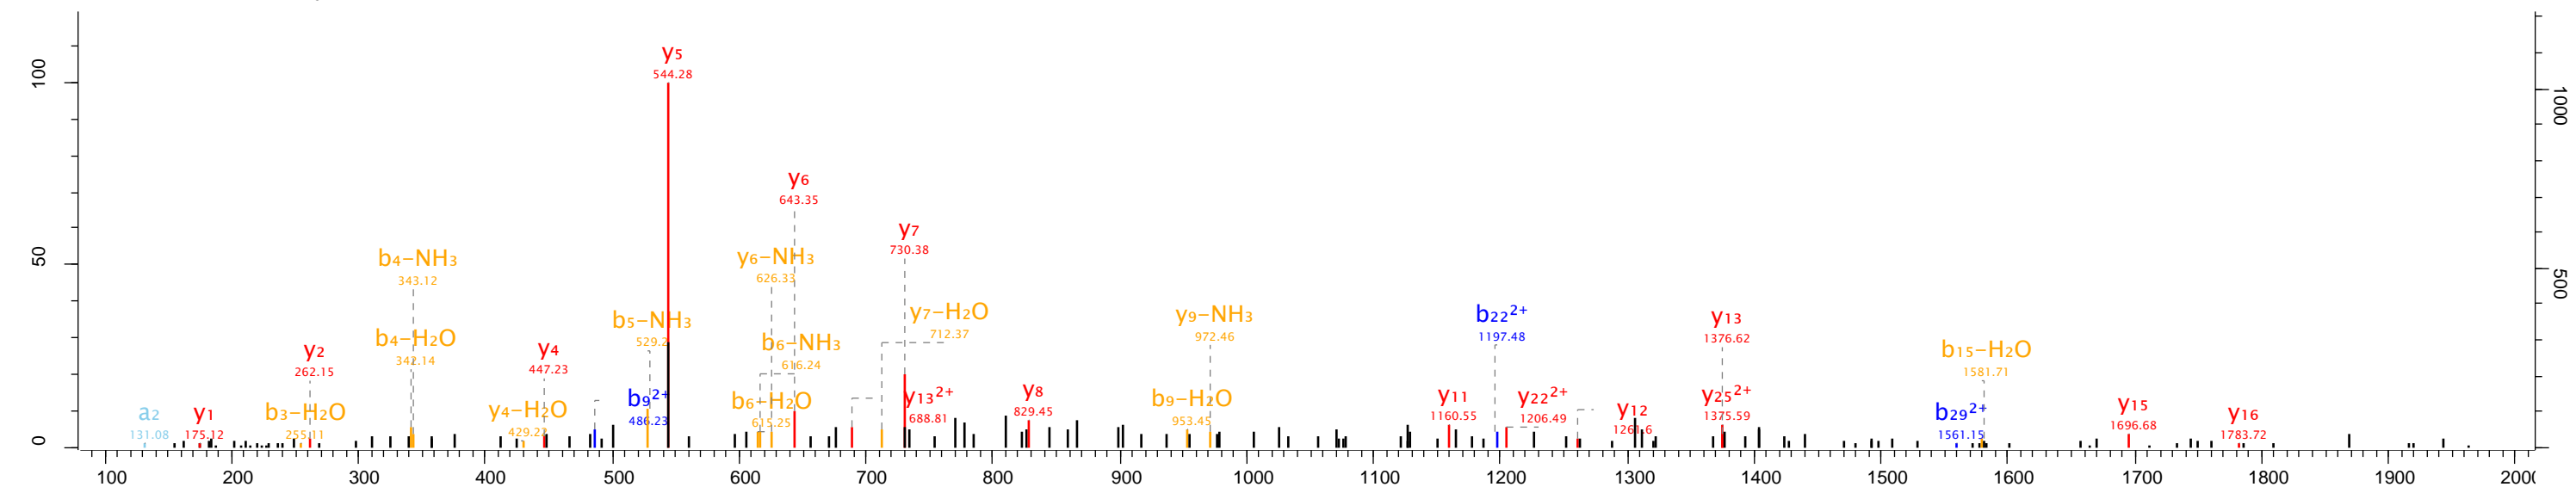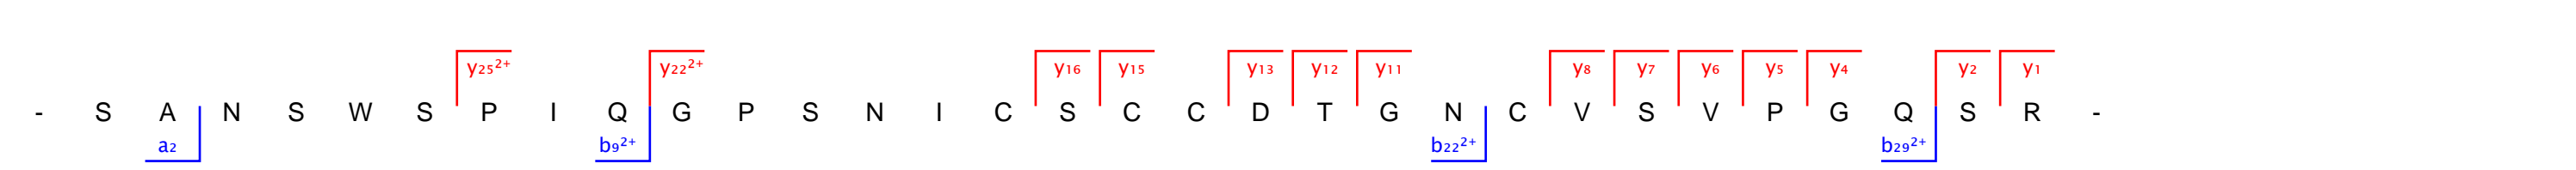

Raw file Scan Method Score m/z  
 2015-01-05\_CL02\_2Excl15sMaxInj70 27849 ITMS; HCD 27.83 1128.82

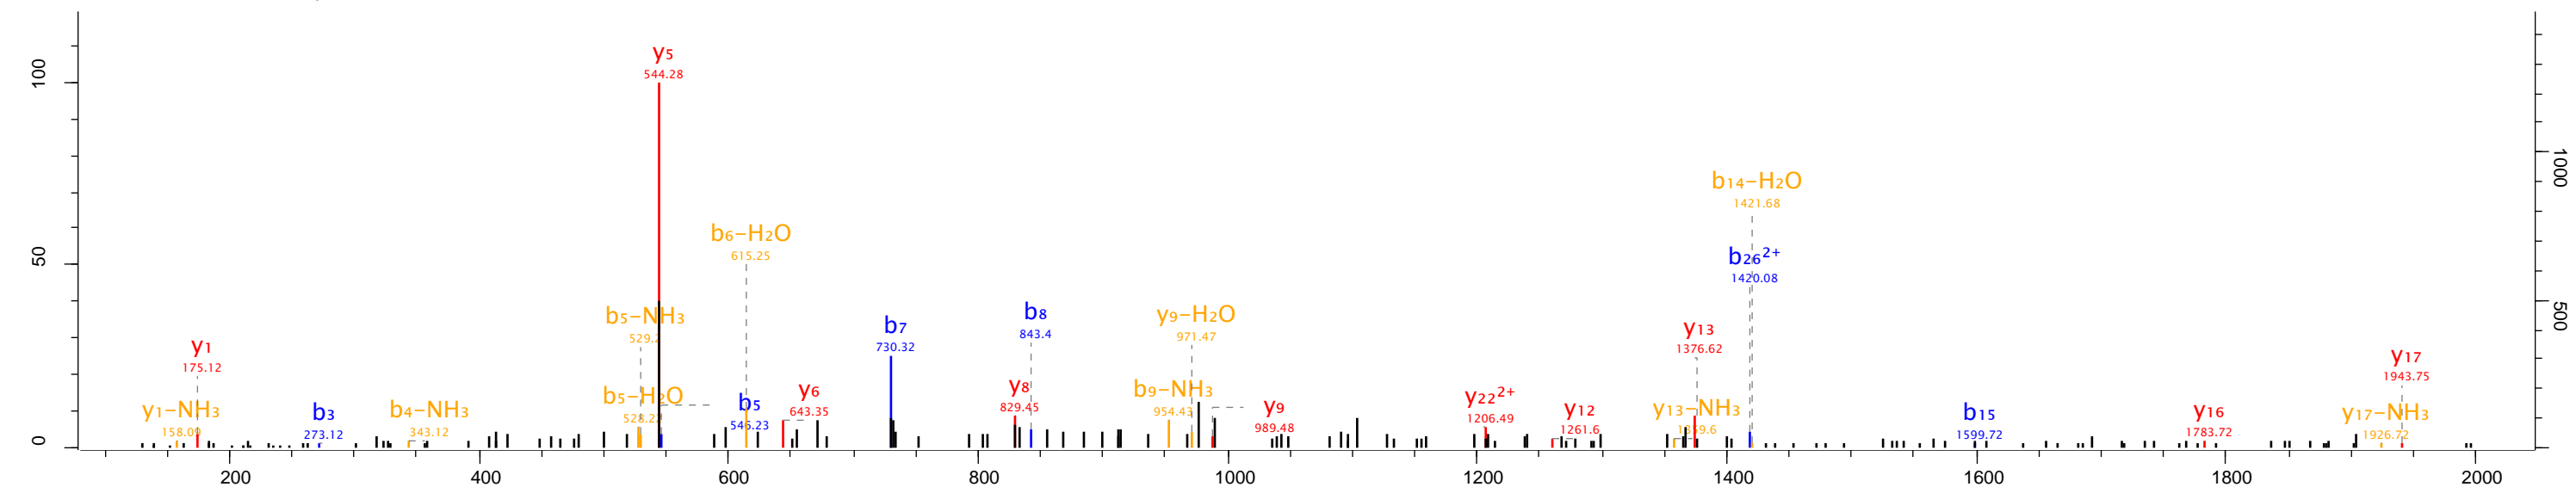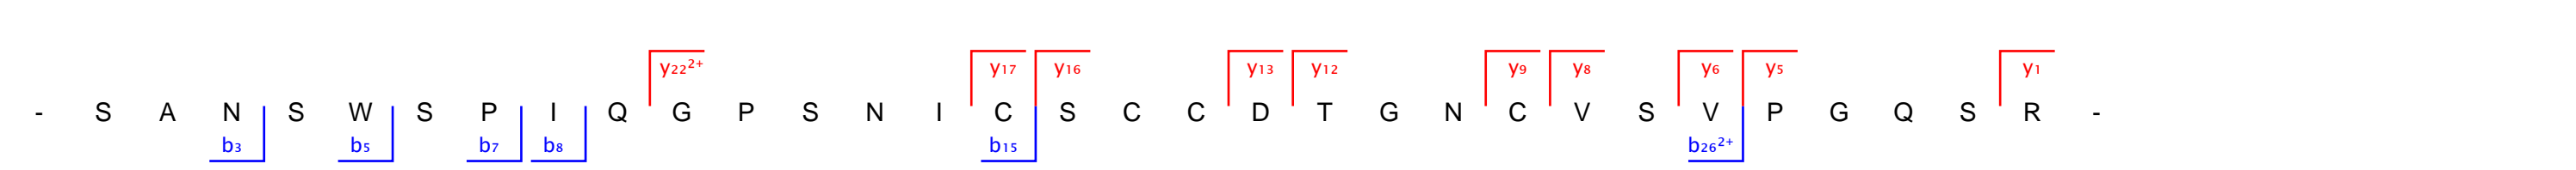

Raw file 2015-01-05\_CL02\_2Excl15sMaxInj70 Scan 27856 Method ITMS; HCD Score 57.84 m/z 1128.48

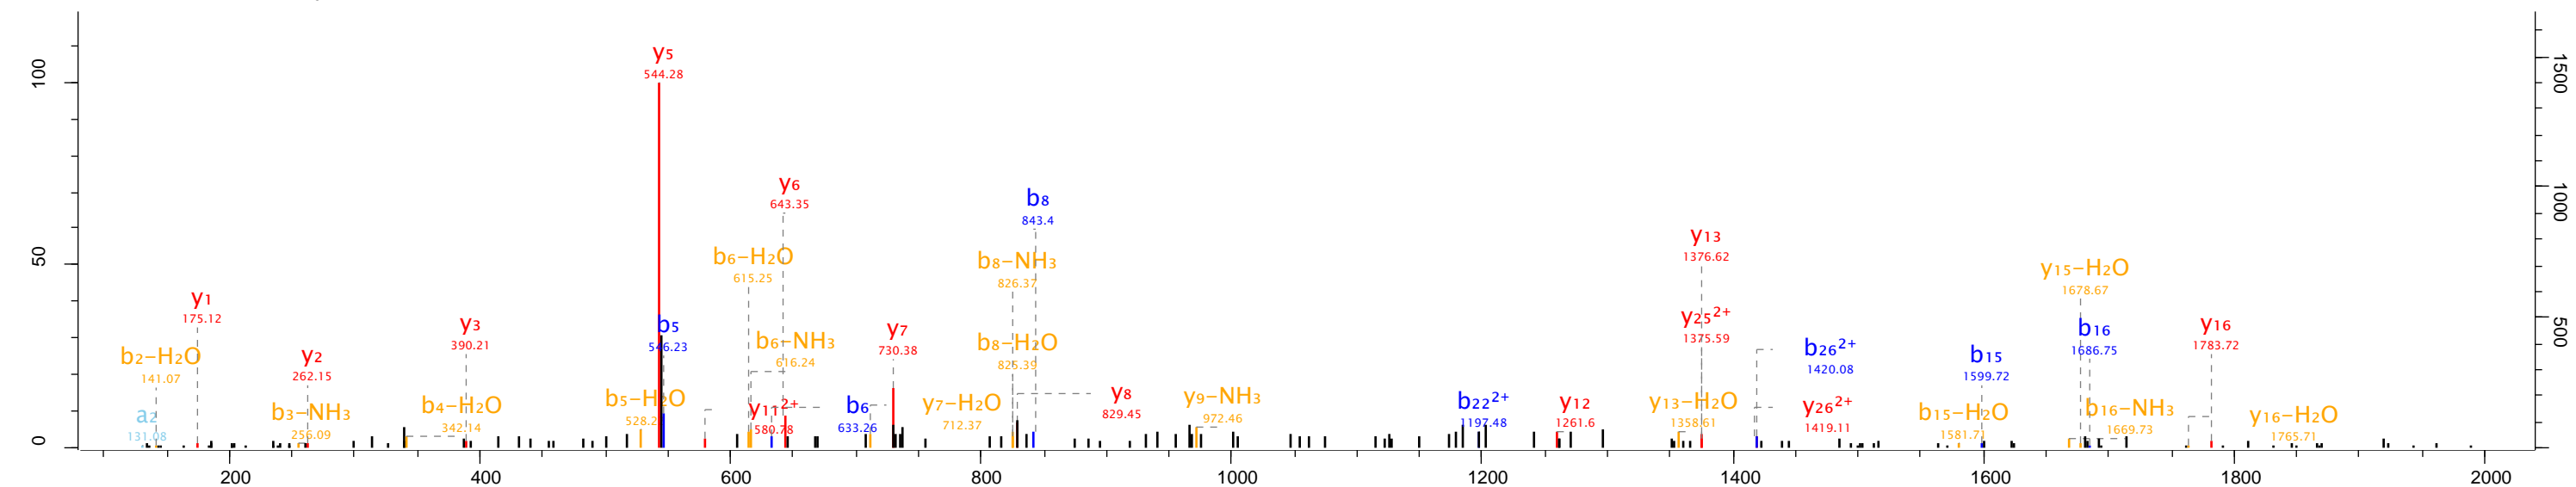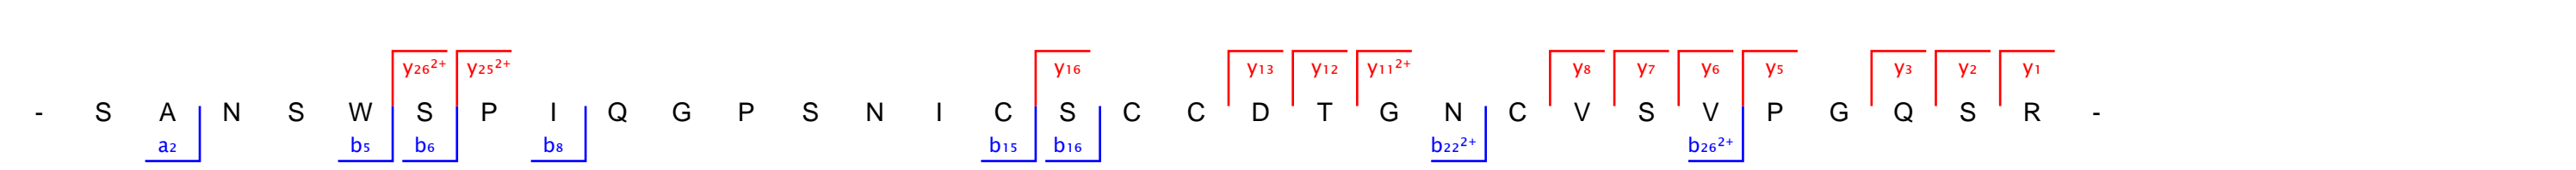

Spectral Annotation for Single-Peptide IDs in 16-cell Embryo using Q-OT-LIT

Raw file 2015-01-05\_CL02\_2Excl15sMaxInj70 Scan 30696 Method ITMS; HCD Score 41.44 m/z 901.71

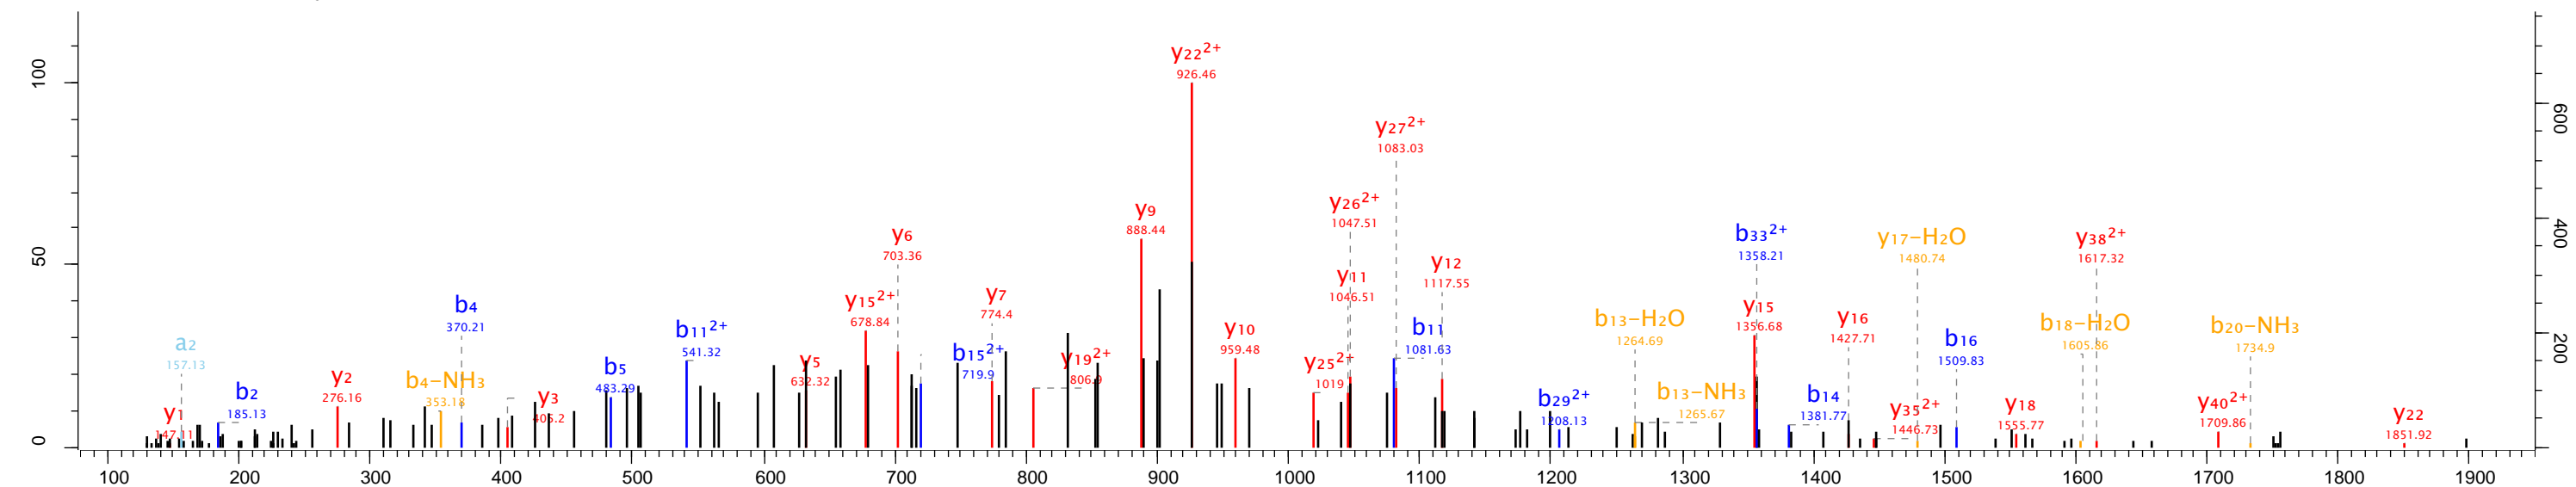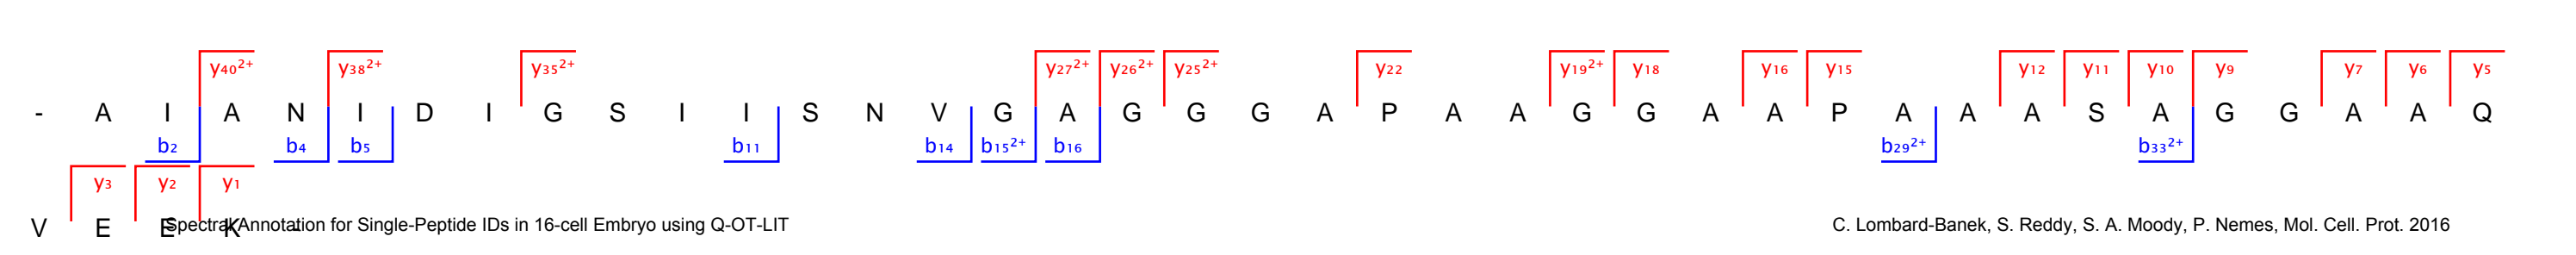

Spectral Annotation for Single-Peptide IDs in 16-cell Embryo using Q-OT-LIT

C. Lombard-Banek, S. Reddy, S. A. Moody, P. Nemes, Mol. Cell. Prot. 2016

Raw file: 2015-01-05\_CL02\_2Excl15sMaxInj70  
 Scan: 30707 Method: ITMS; HCD Score: 43.42 m/z: 902.22

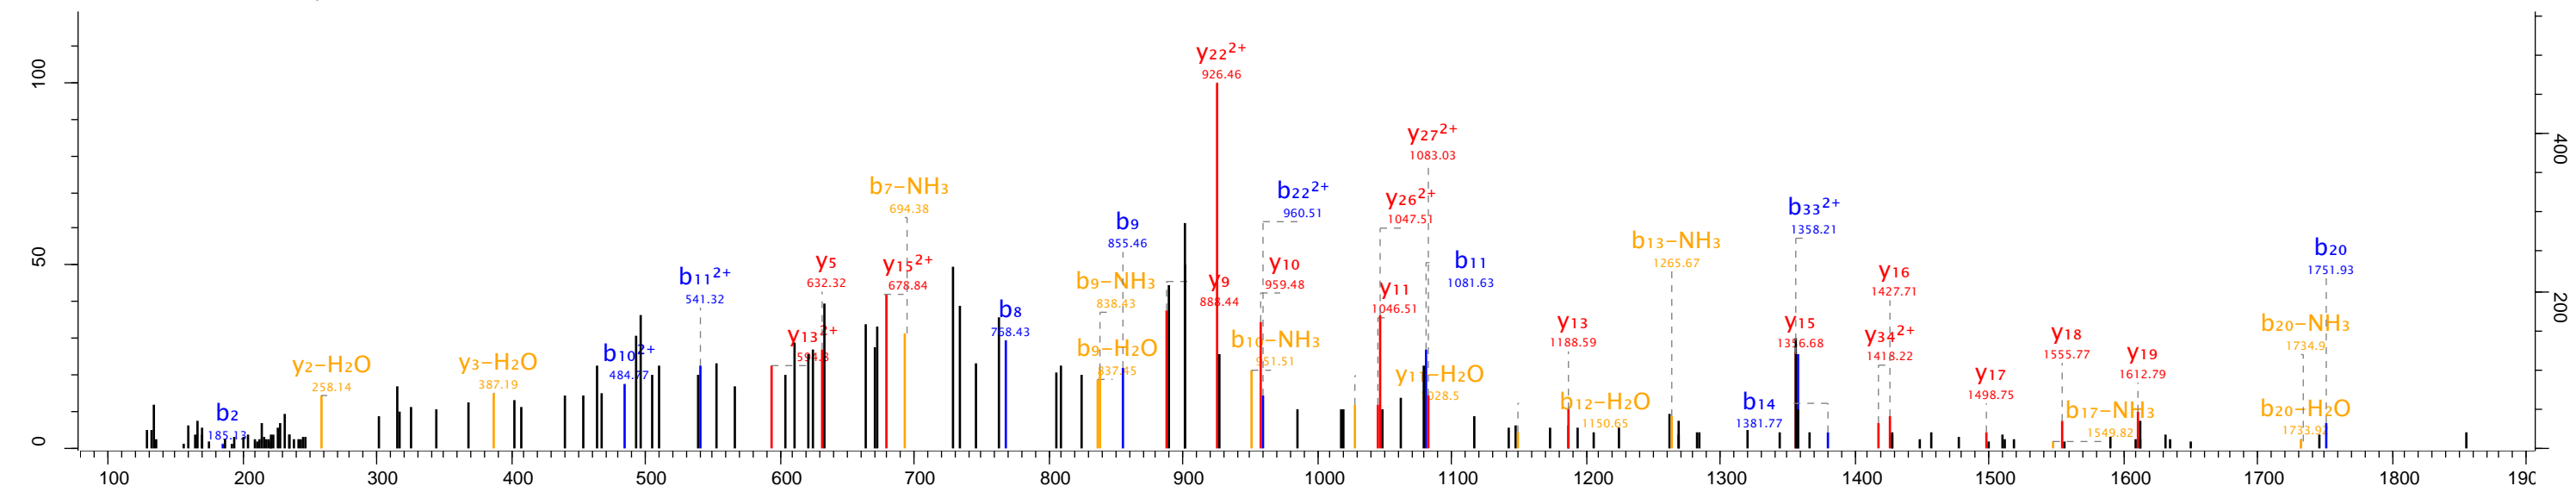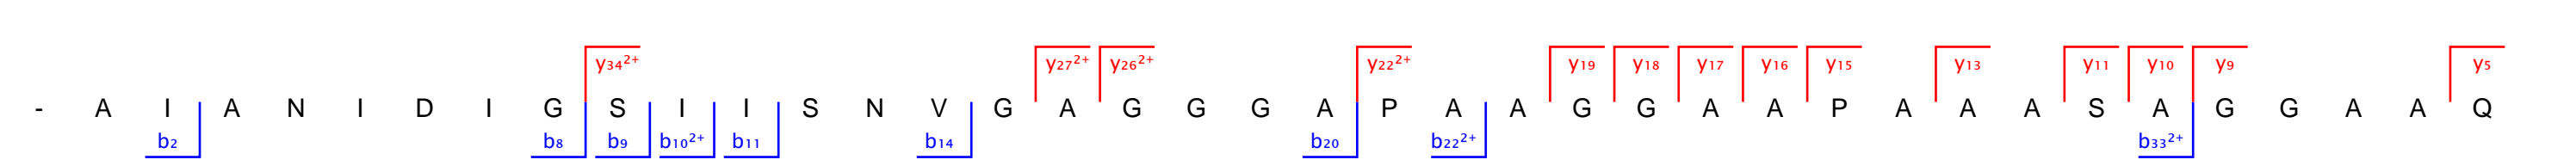

V E SpectraK Annotation for Single-Peptide IDs in 16-cell Embryo using Q-OT-LIT

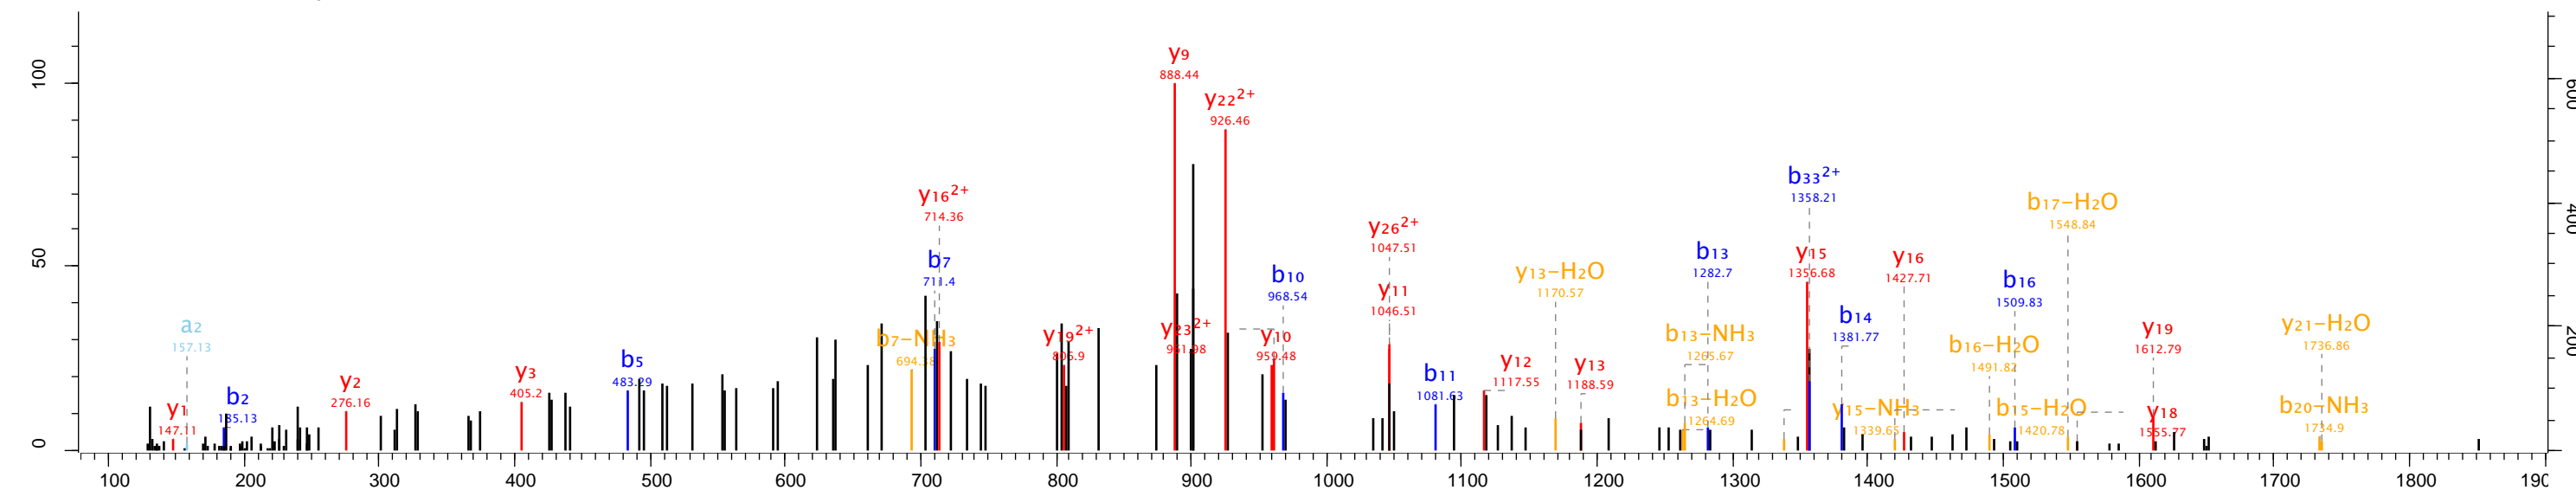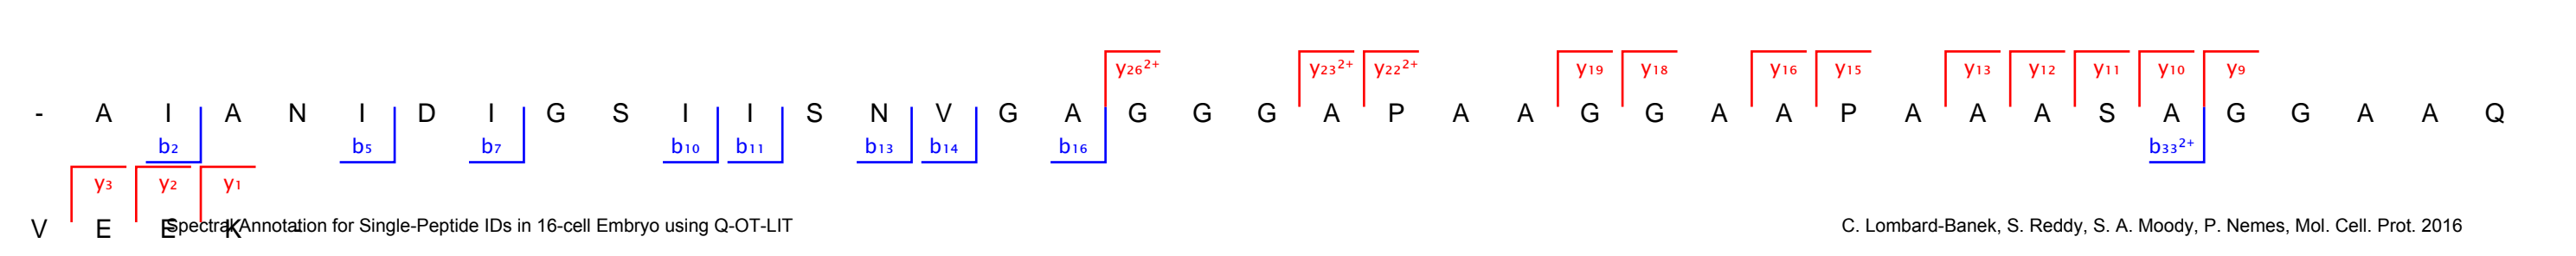

Raw file  
 2015-01-05\_CL02\_2Excl15sMaxInj70  
 Scan 30919 Method ITMS; HCD Score 66.79 m/z 901.71

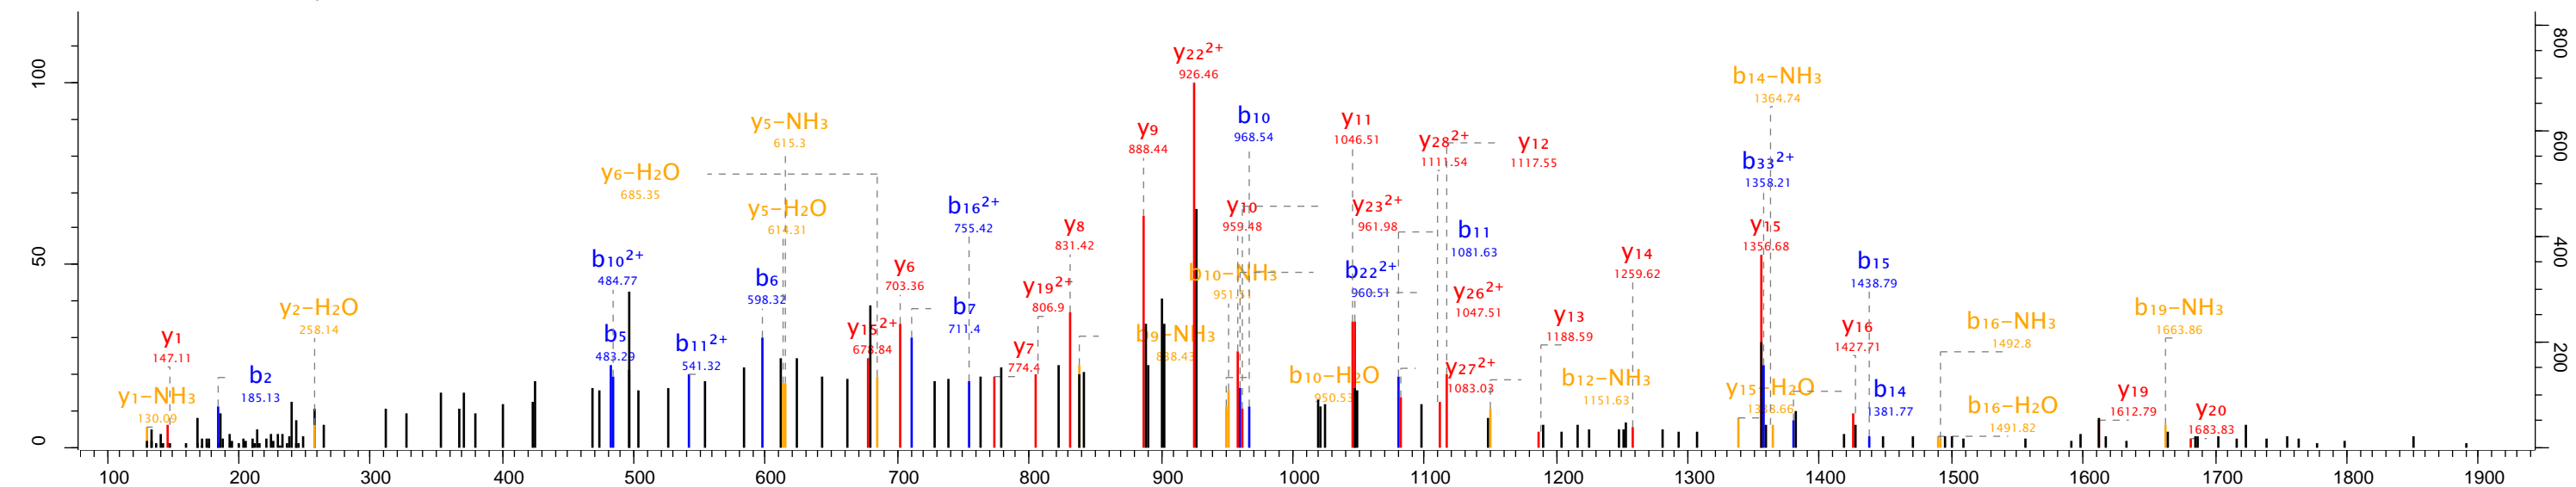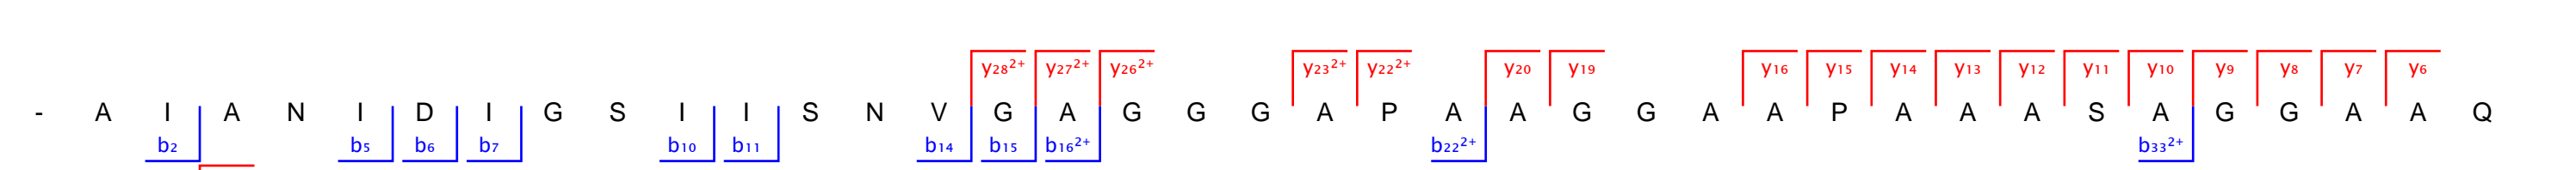

V E Spectral Annotation for Single-Peptide IDs in 16-cell Embryo using Q-OT-LIT

Raw file: 2015-01-05\_CL02\_2Excl15sMaxInj70  
 Scan: 30929  
 Method: ITMS; HCD  
 Score: 66.02  
 m/z: 901.72

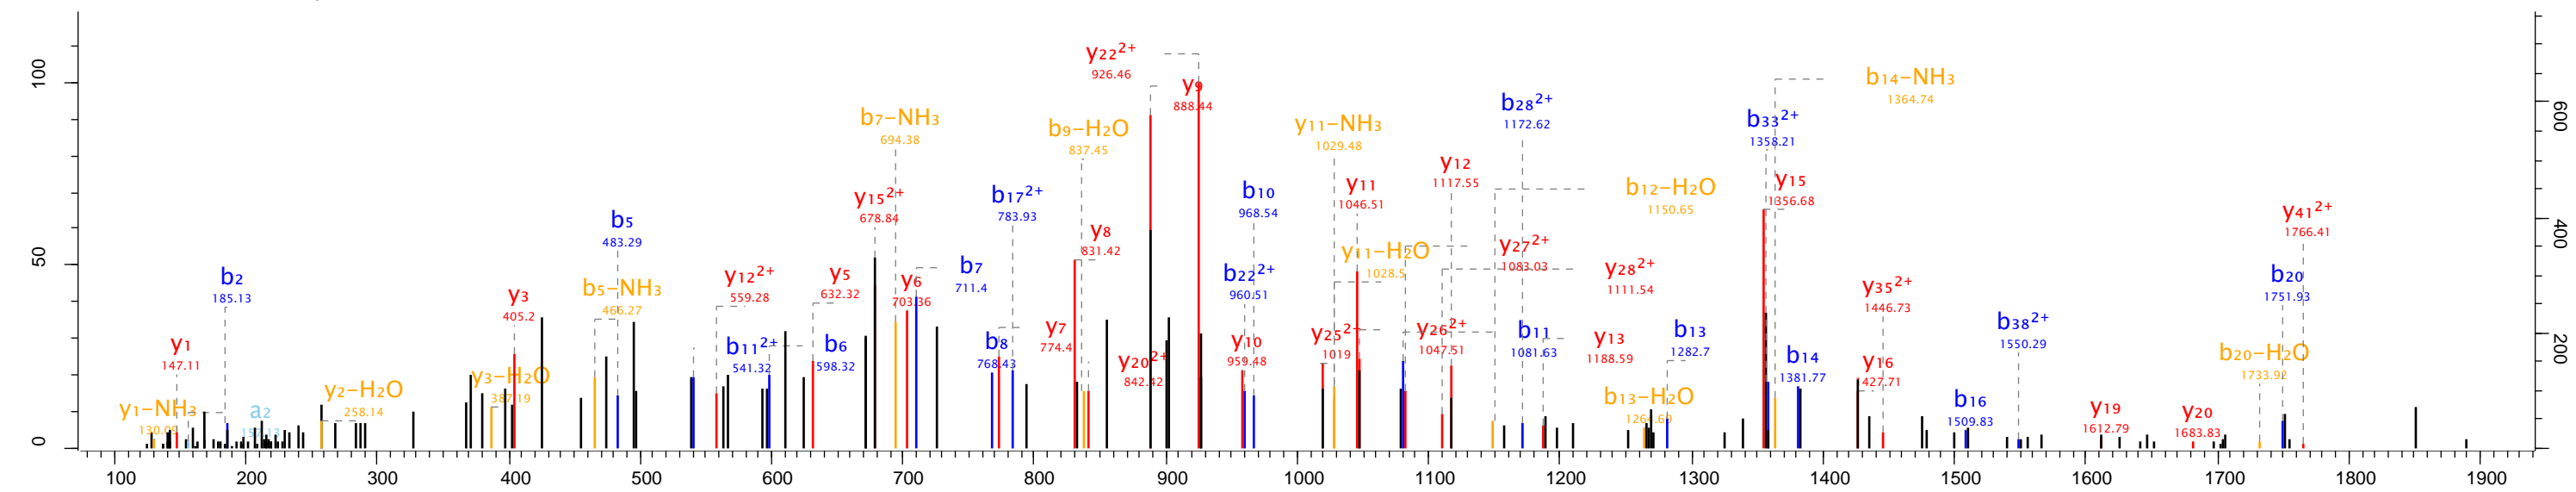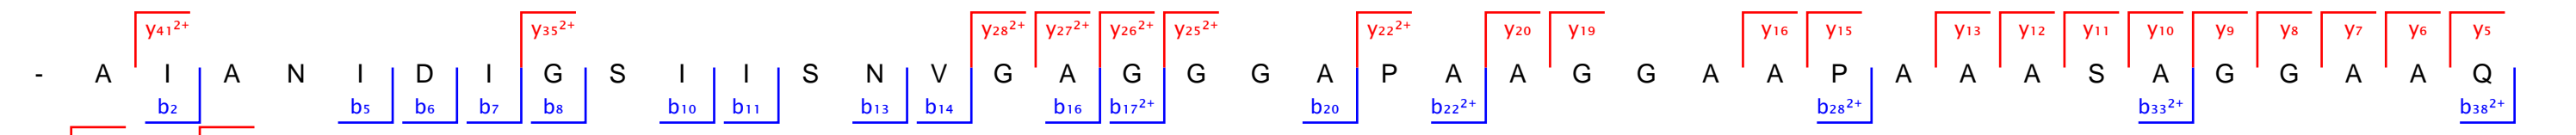

V E Spectral Annotation for Single-Peptide IDs in 16-cell Embryo using Q-OT-LIT

C. Lombard-Banek, S. Reddy, S. A. Moody, P. Nemes, Mol. Cell. Prot. 2016



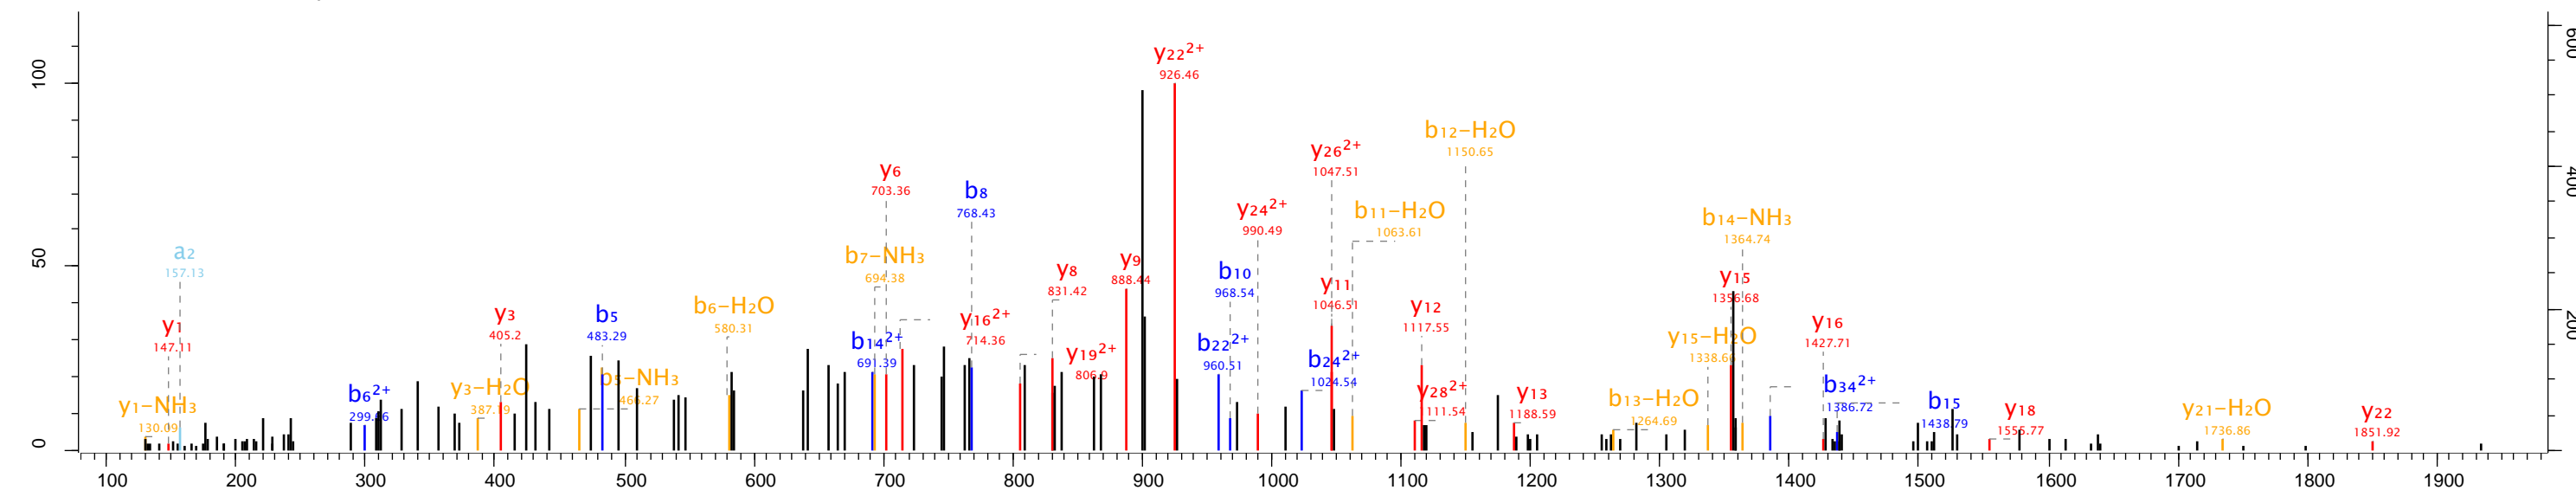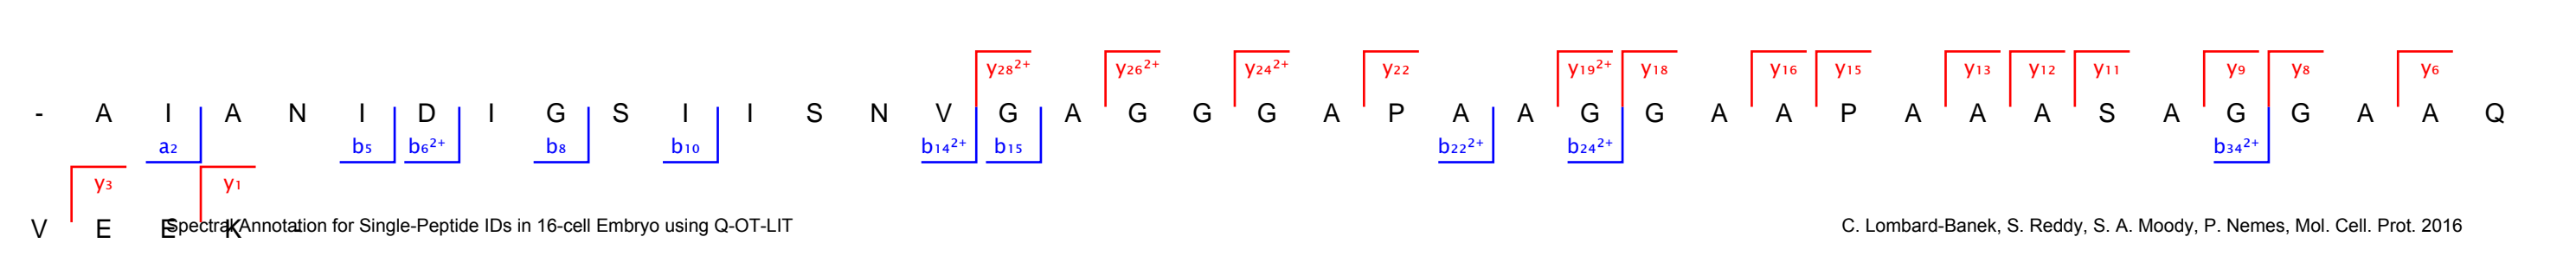

Raw file: 2015-01-05\_CL02\_2Excl15sMaxInj70  
 Scan: 32813 Method: ITMS; HCD Score: 72.7 m/z: 778.36

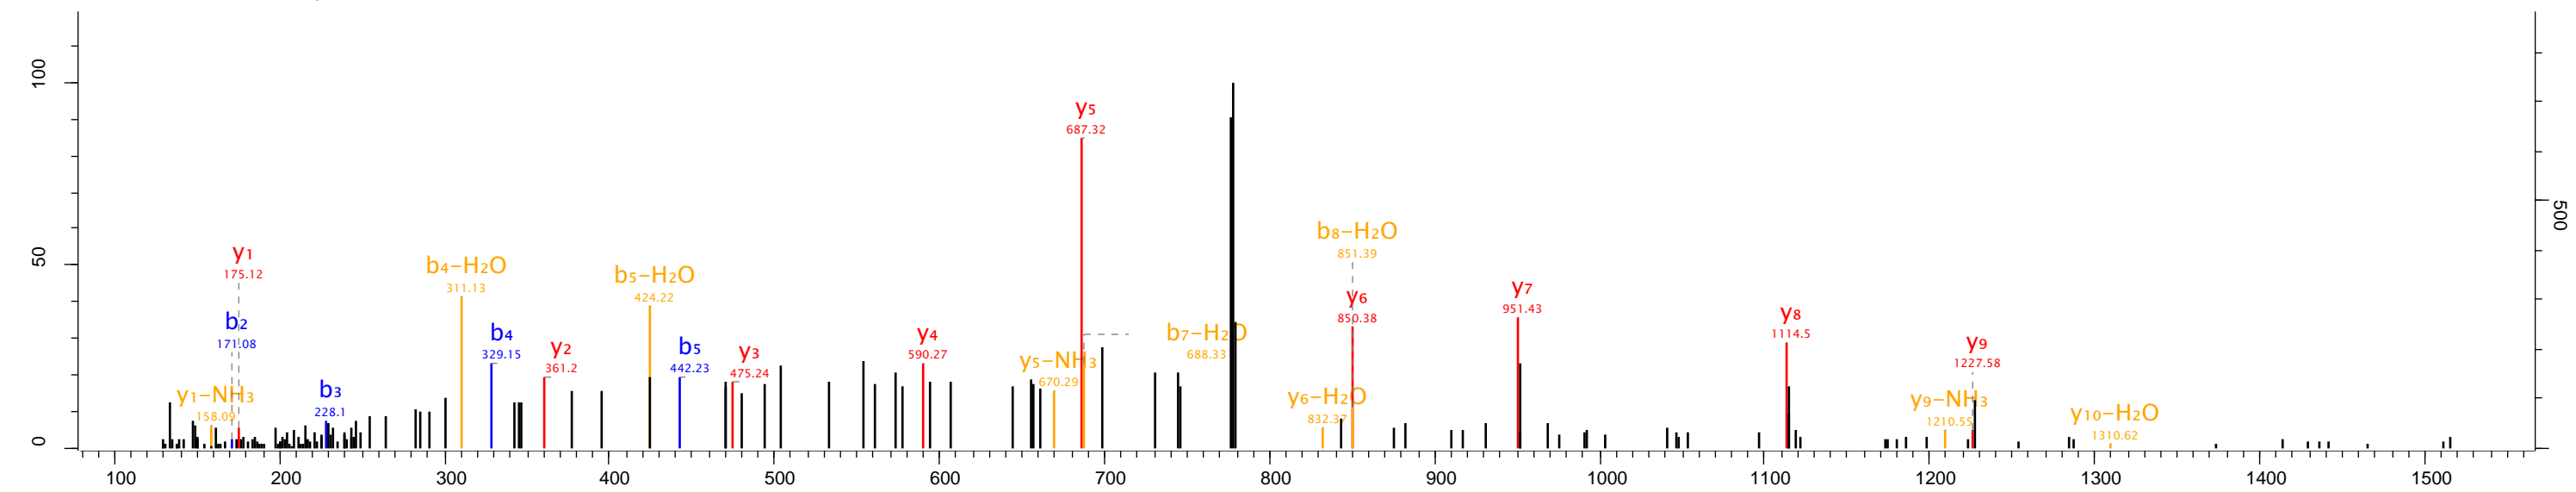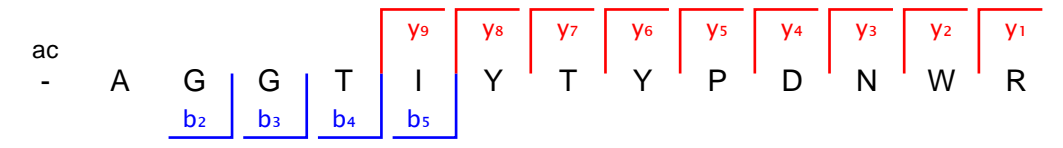

Raw file Scan Method Score m/z  
 2015-01-05\_CL02\_2Excl15sMaxInj70 32816 ITMS; HCD 76.07 778.36

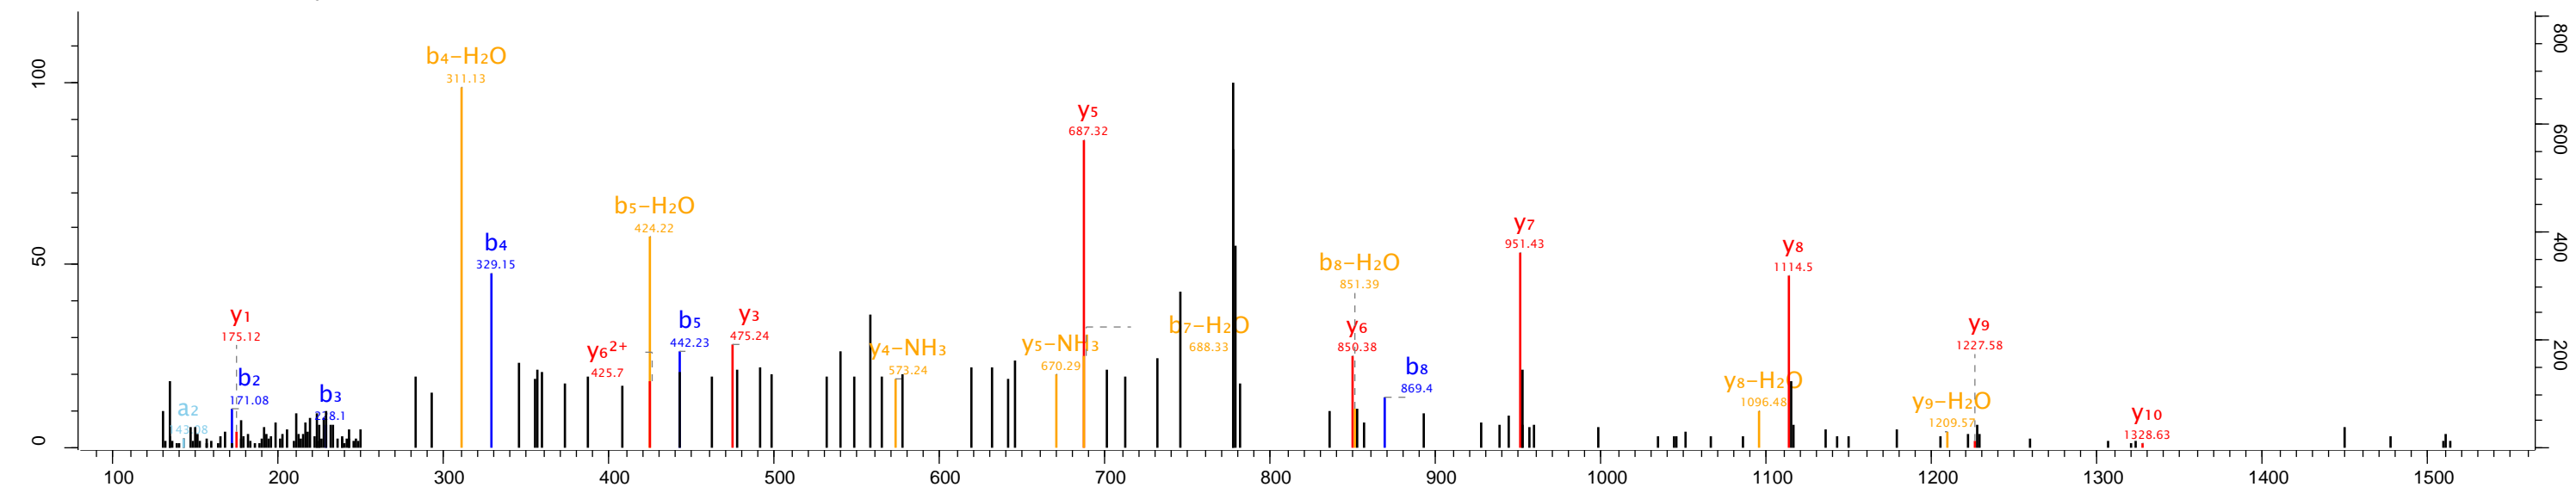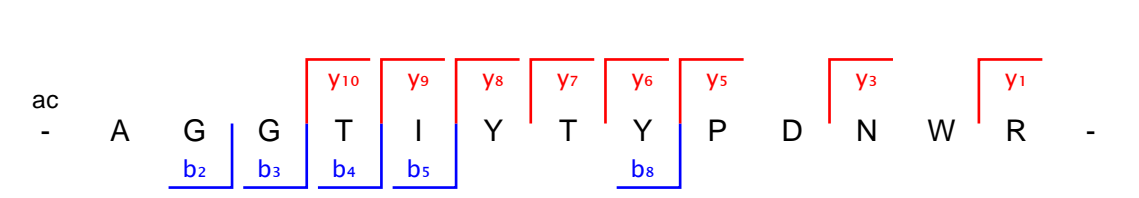

Raw file  
 2015-01-05\_CL02\_2Excl15sMaxInj70  
 Scan 32821 Method ITMS; HCD Score 72.7 m/z 778.36

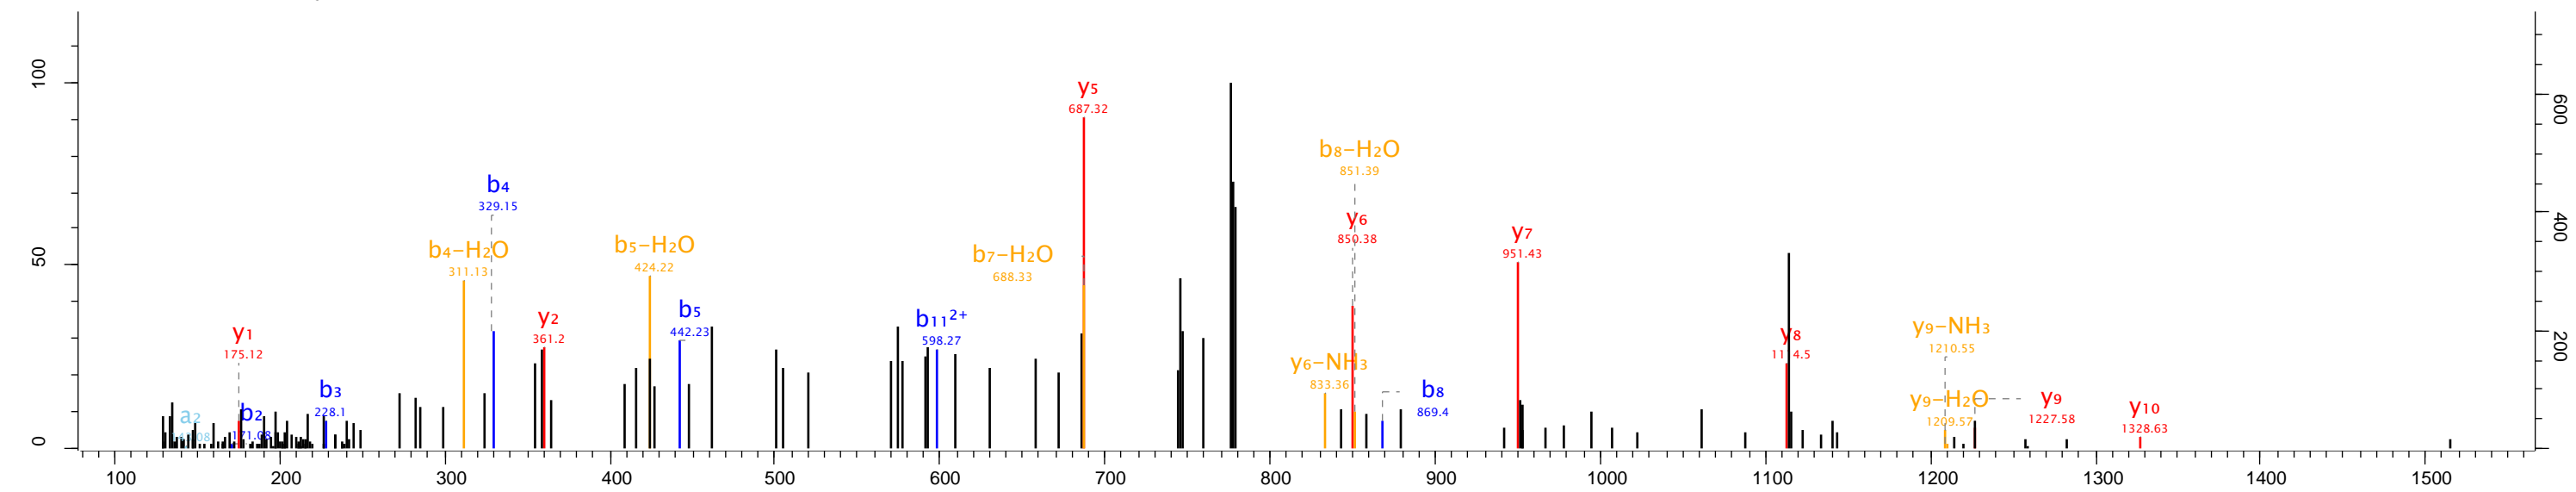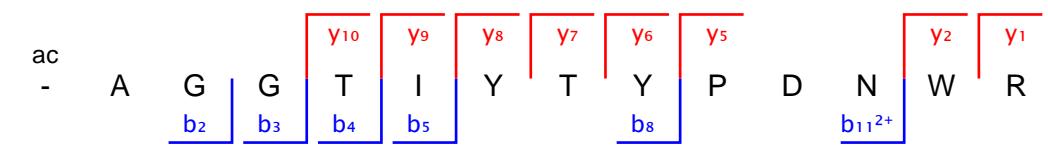

Spectral Annotation for Single-Peptide IDs in 16-cell Embryo using Q-OT-LIT

Raw file: 2015-01-05\_CL03\_XenEmb\_x2  
 Scan: 18626 Method: ITMS; HCD Score: 121.29 m/z: 483.78

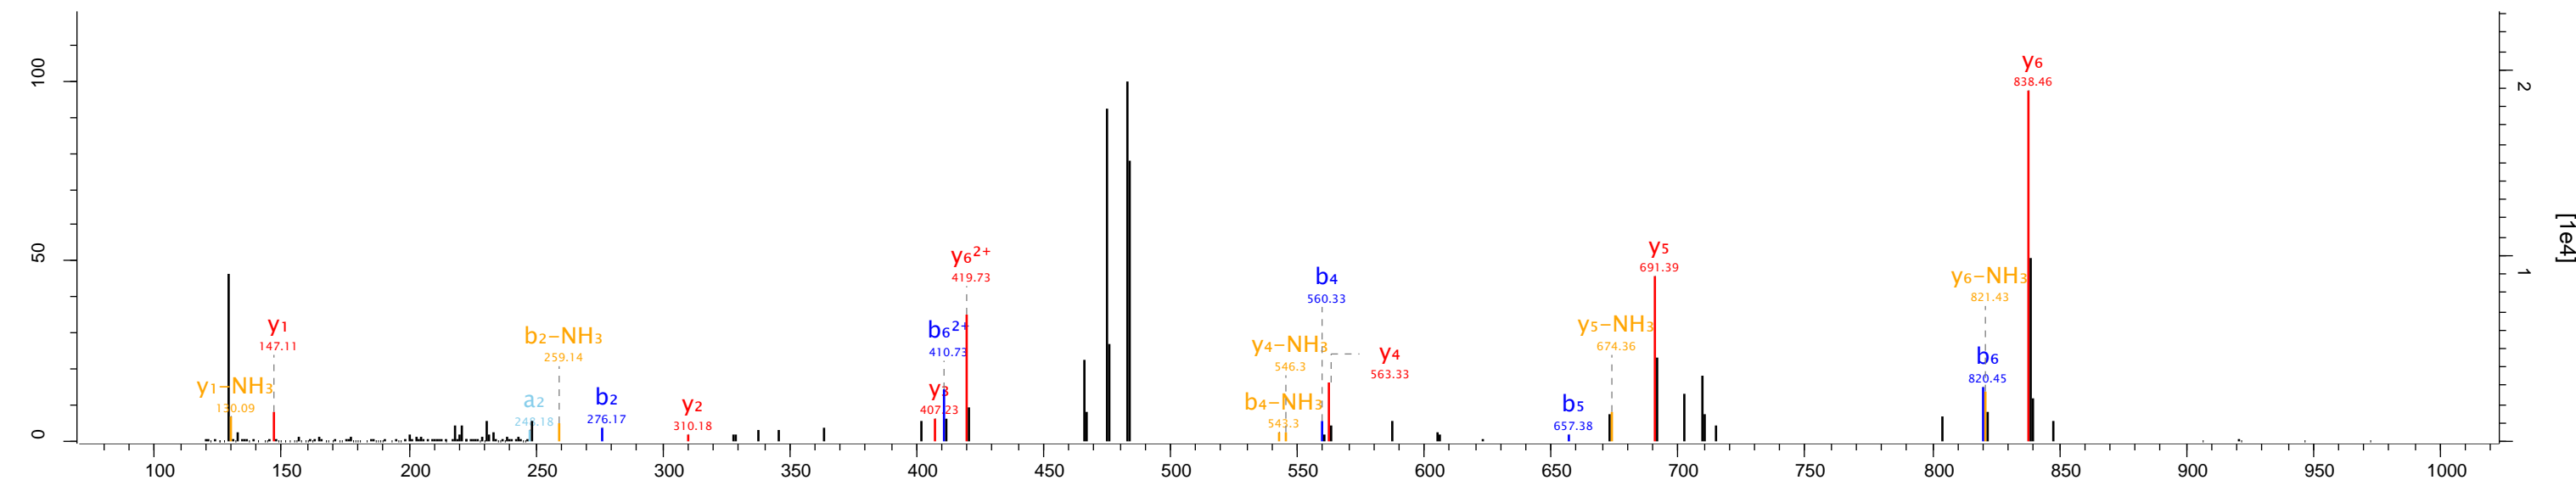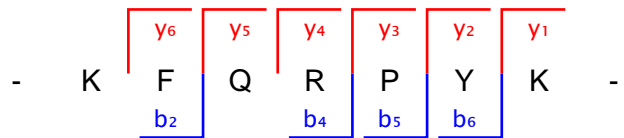

Raw file 2015-01-05\_CL03\_XenEmb\_x2 Scan 18632 Method ITMS; HCD Score 123.99 m/z 483.78

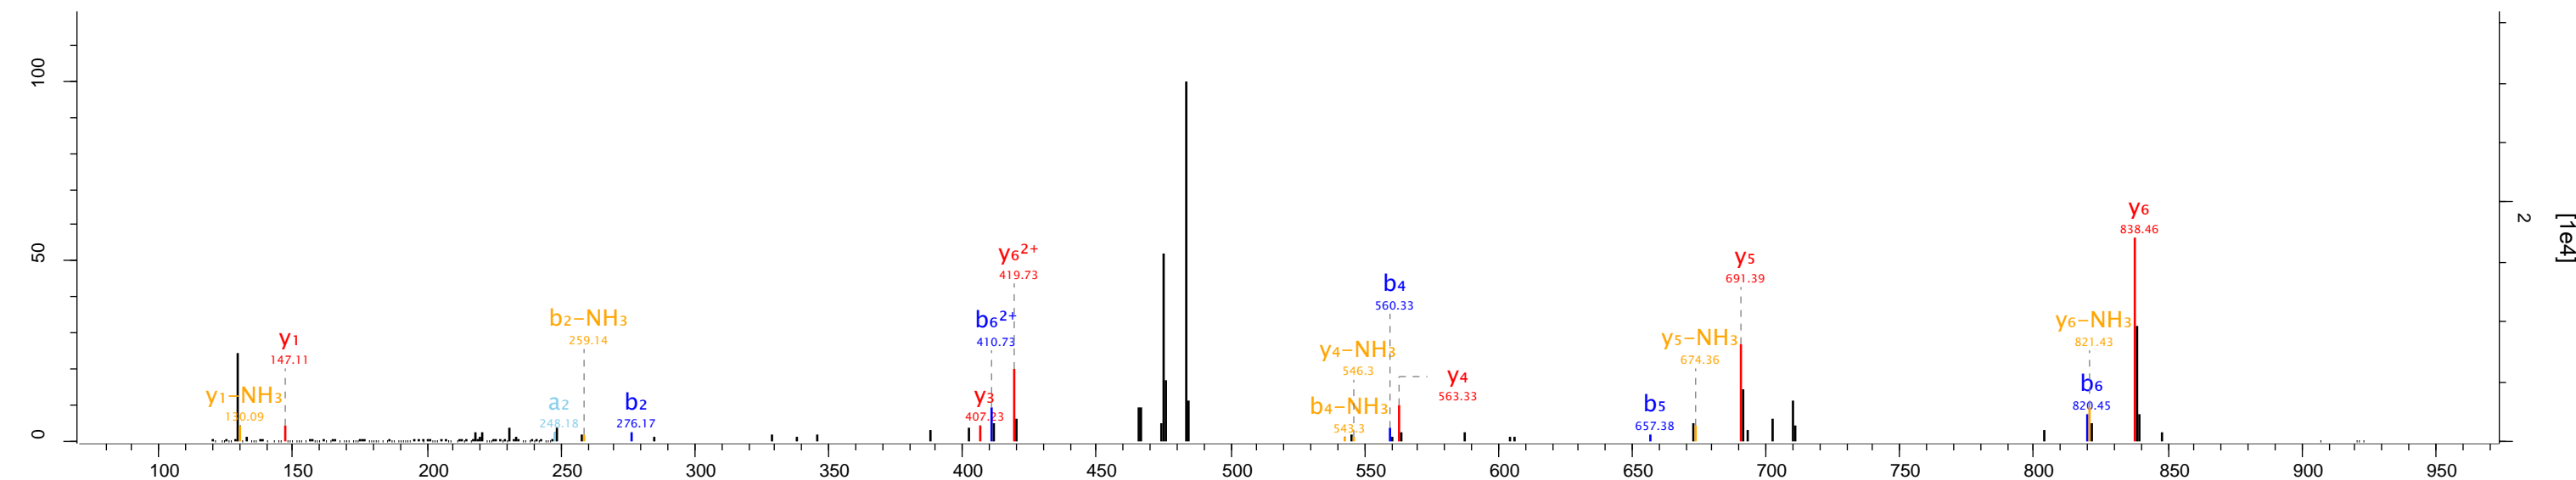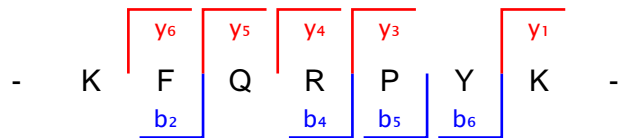

Raw file: 2015-01-05\_CL03\_XenEmb\_x2  
 Scan: 20112  
 Method: ITMS; HCD  
 Score: 74.17  
 m/z: 570.31

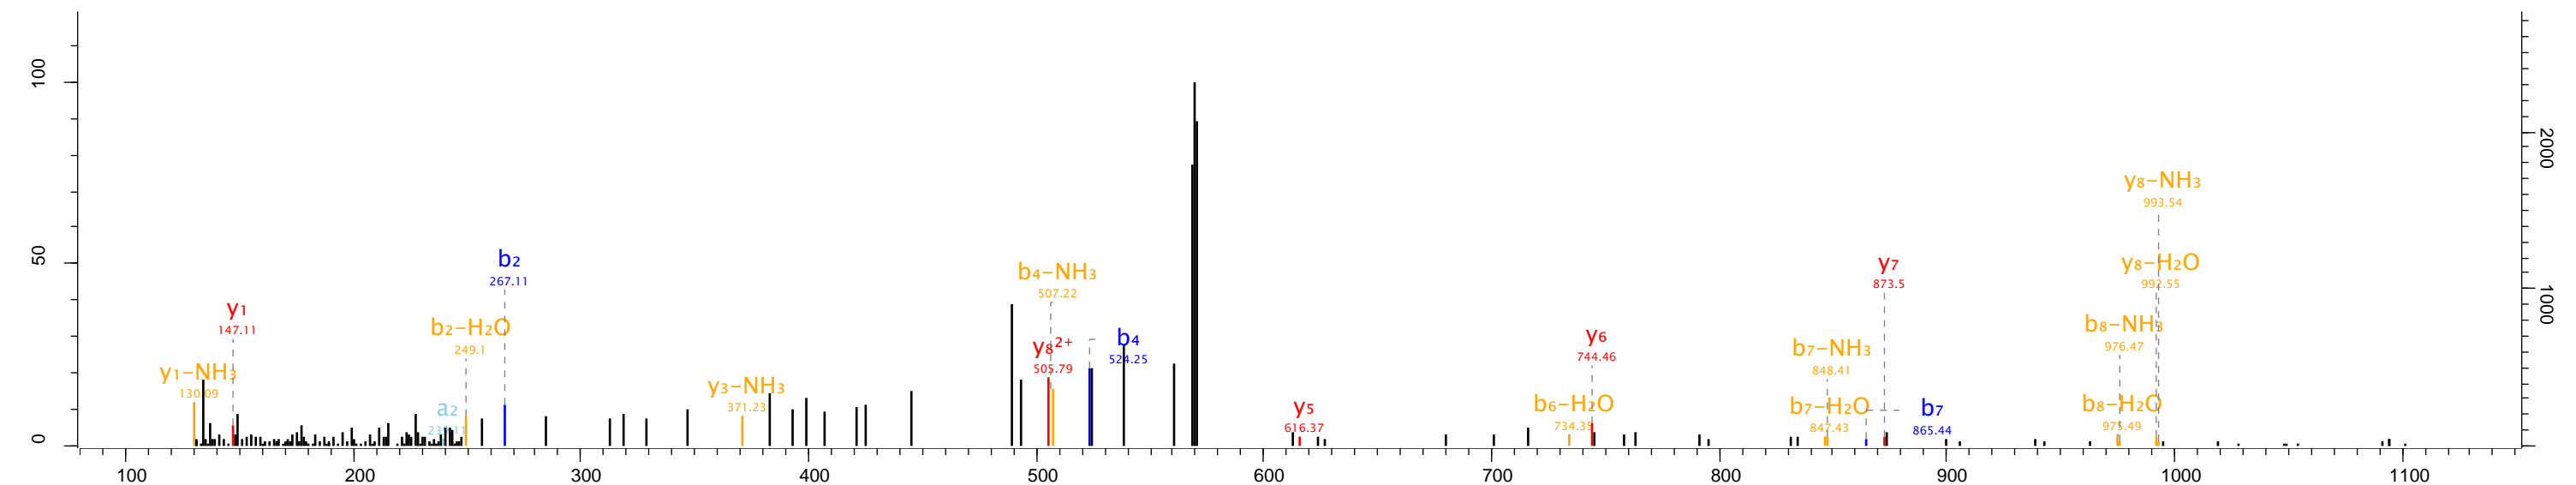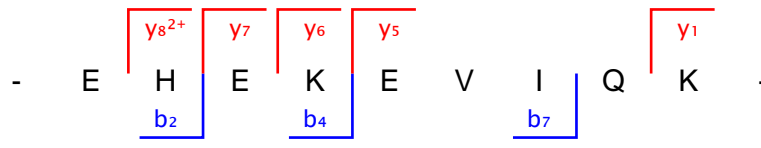

Raw file: 2015-01-05\_CL03\_XenEmb\_x2  
 Scan: 20461 Method: ITMS; HCD Score: 42.31 m/z: 453.98

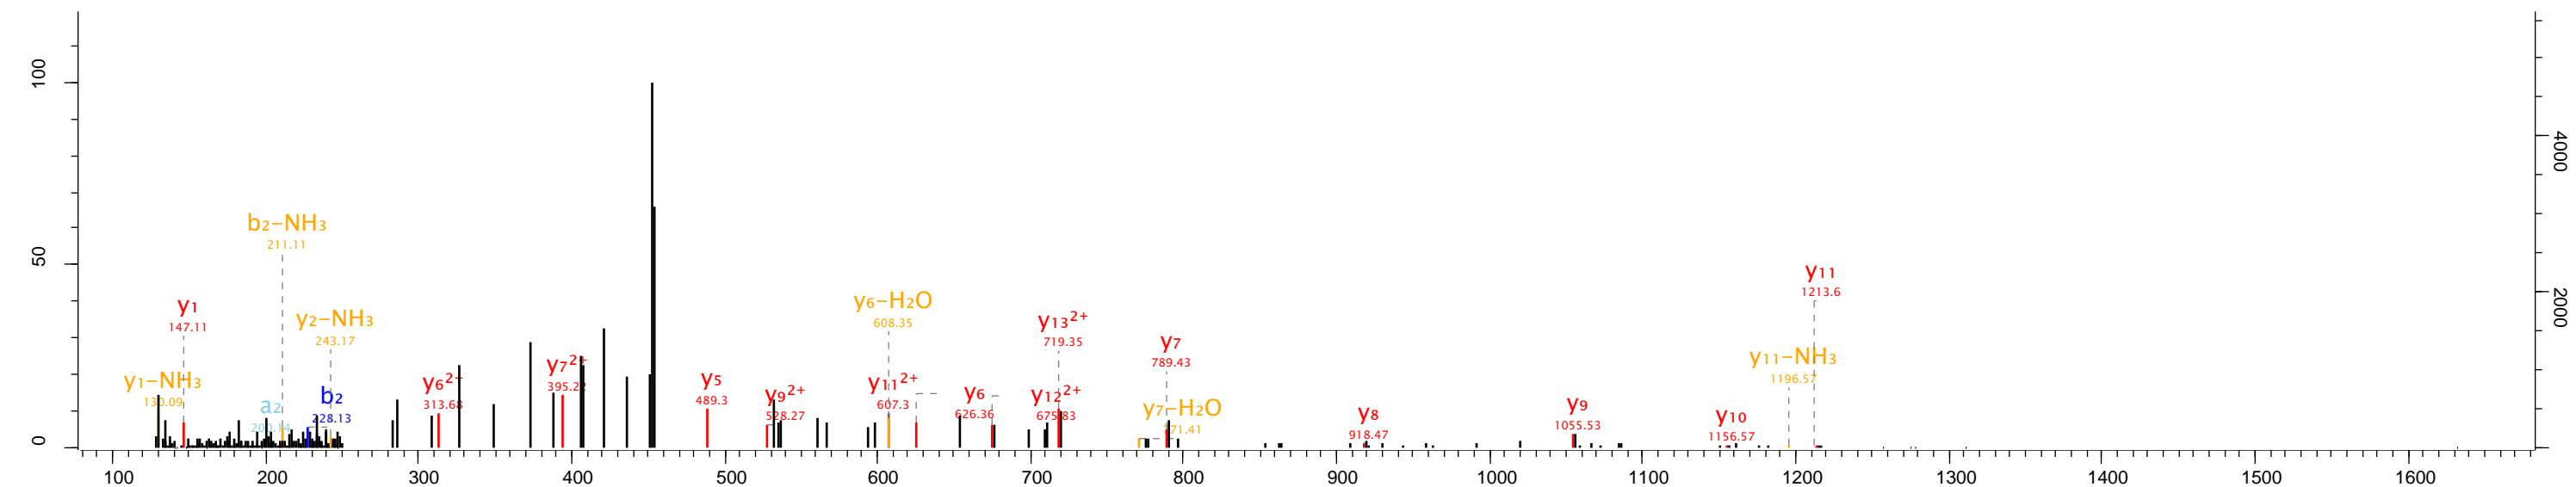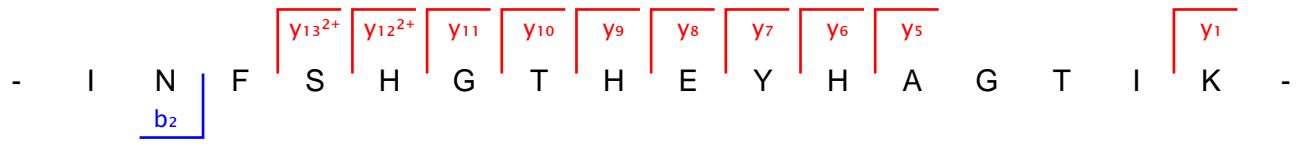



Raw file: 2015-01-05\_CL03\_XenEmb\_x2  
 Scan: 20466 Method: ITMS; HCD Score: 43.86 m/z: 453.72

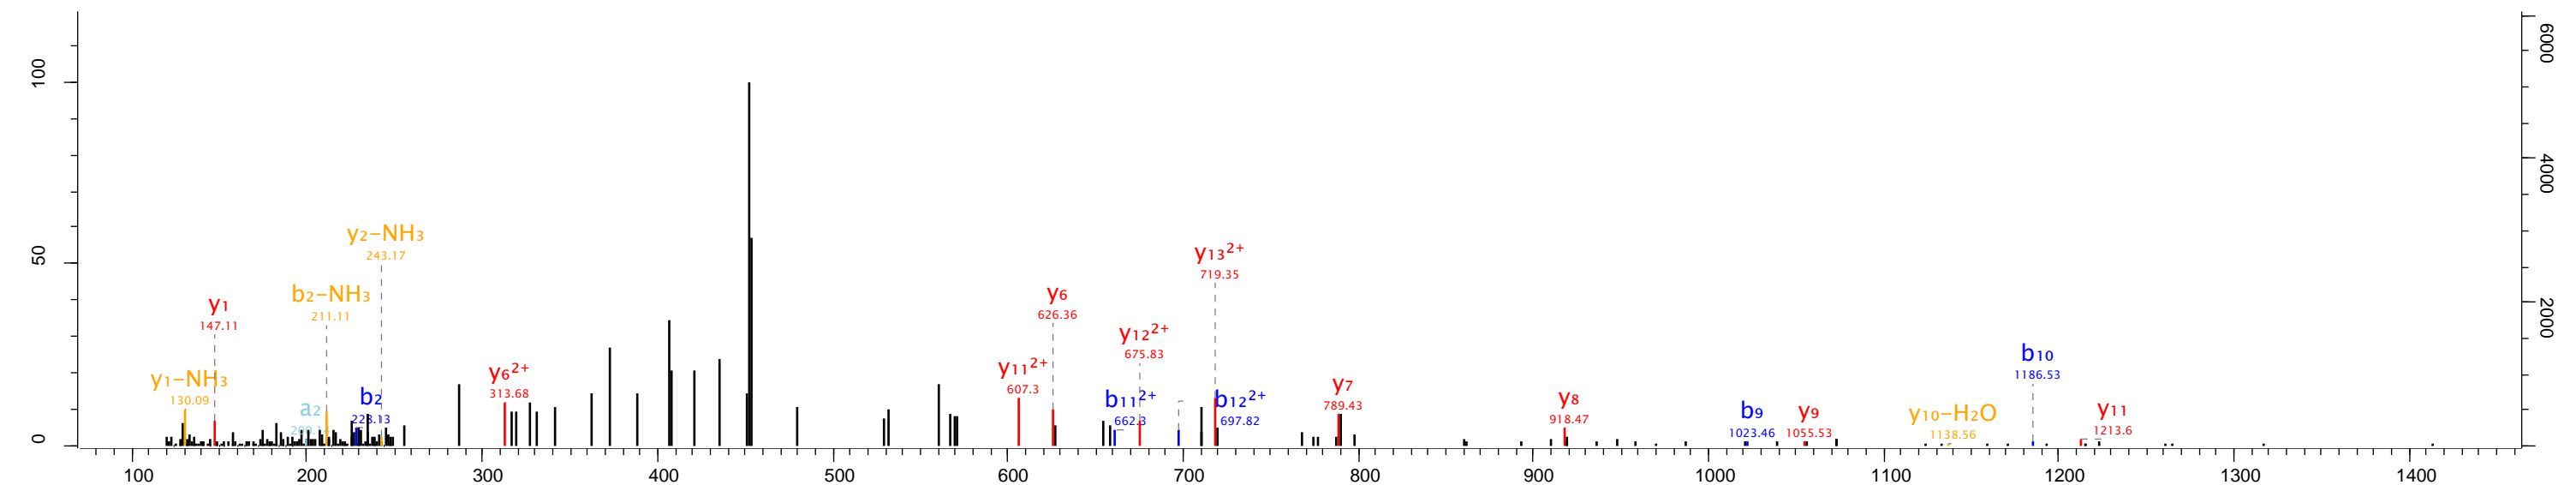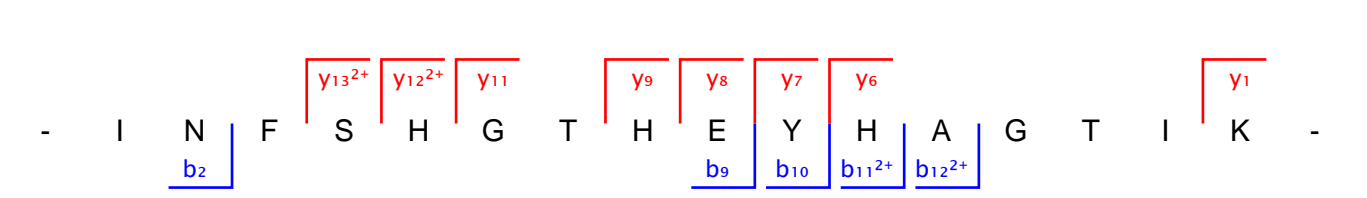

Raw file: 2015-01-05\_CL03\_XenEmb\_x2  
 Scan: 20475 Method: ITMS; HCD Score: 42.95 m/z: 604.63

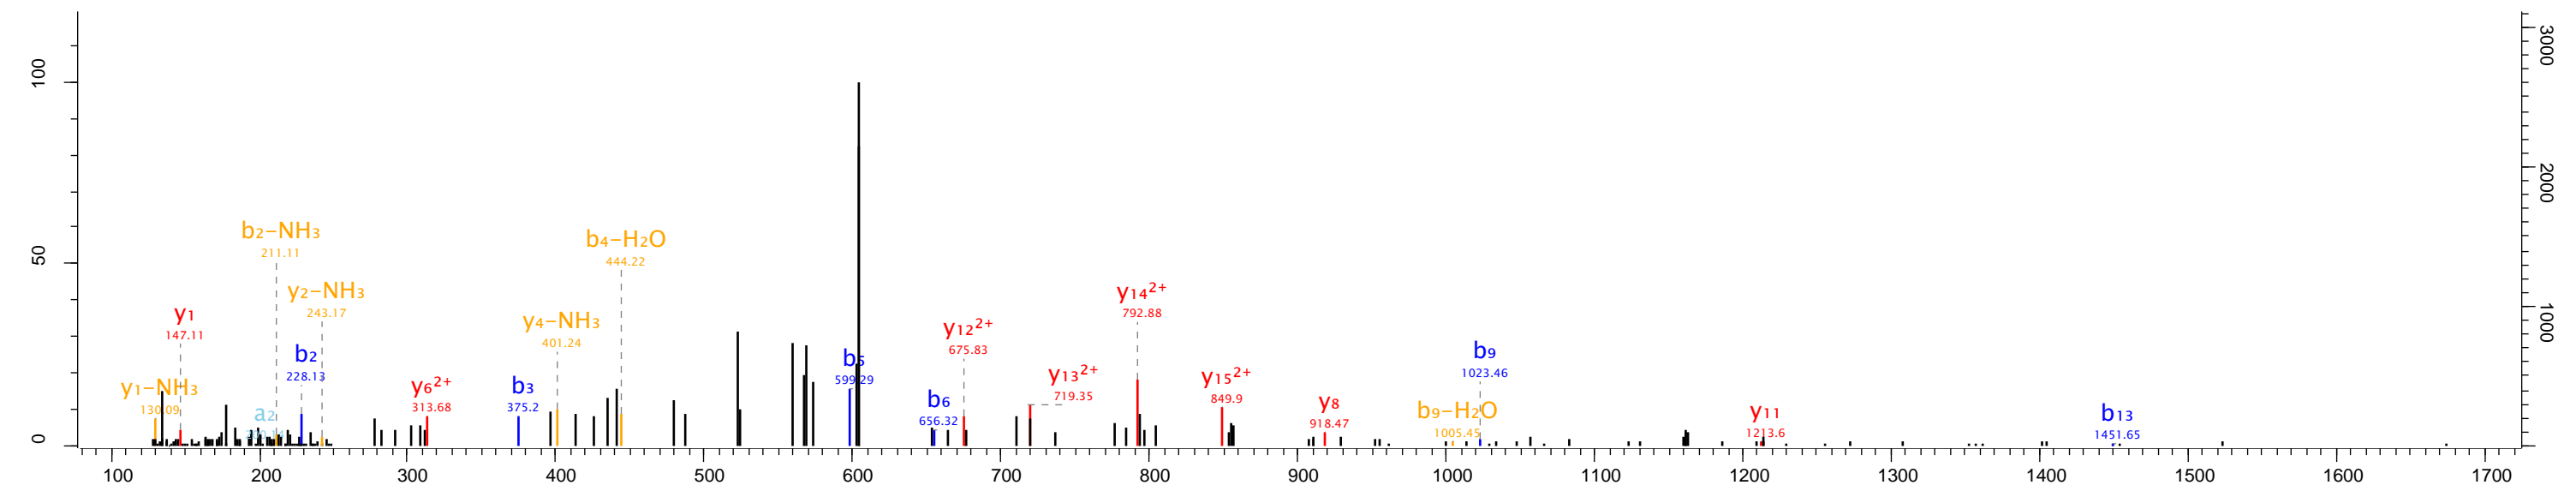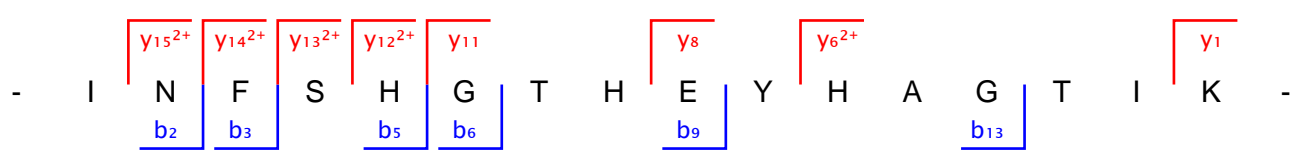

Raw file: 2015-01-05\_CL03\_XenEmb\_x2  
 Scan: 20480  
 Method: ITMS; HCD  
 Score: 54.81  
 m/z: 453.72

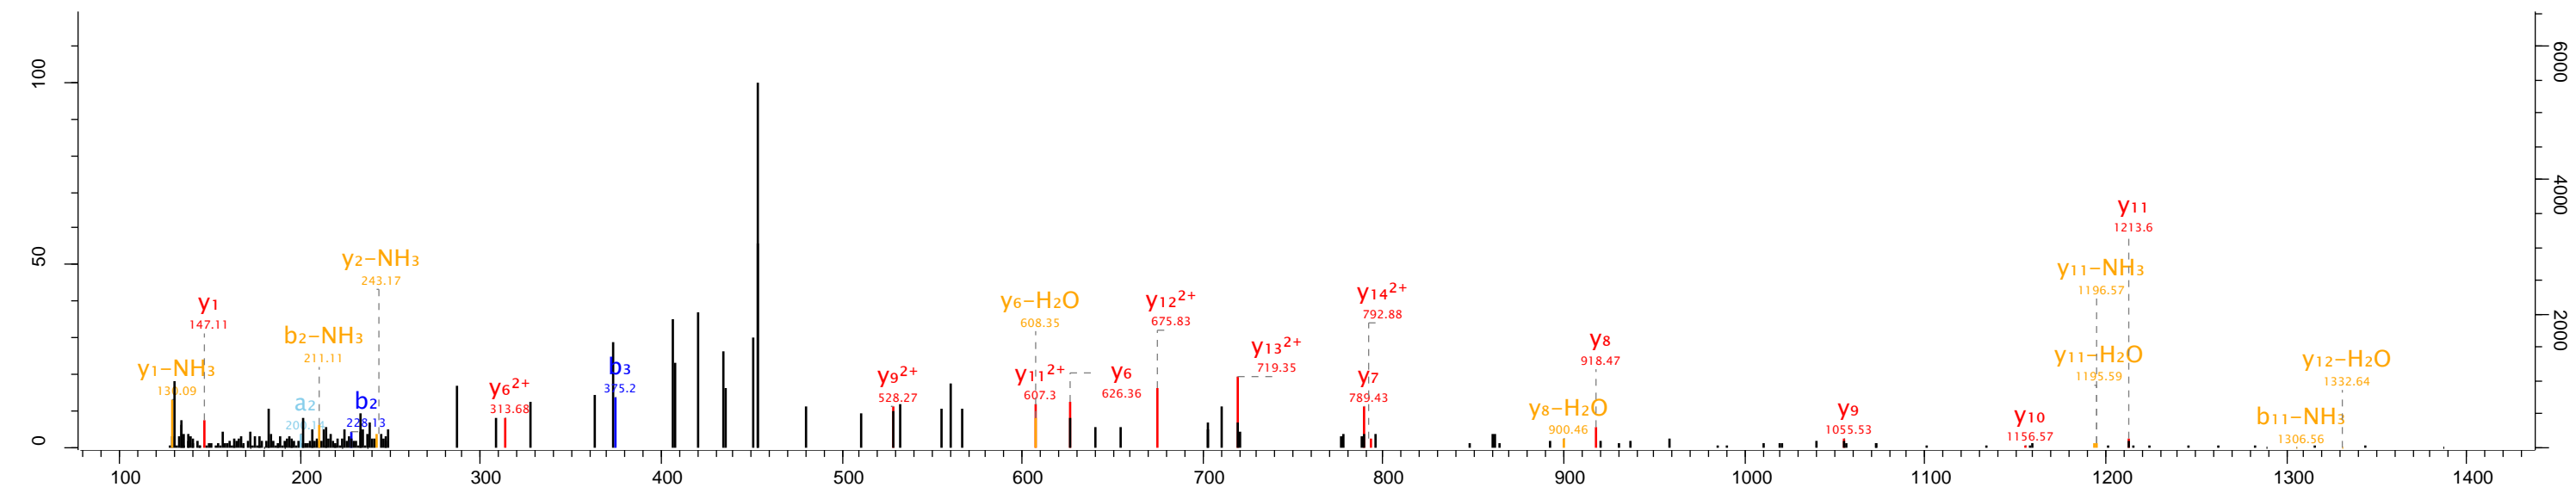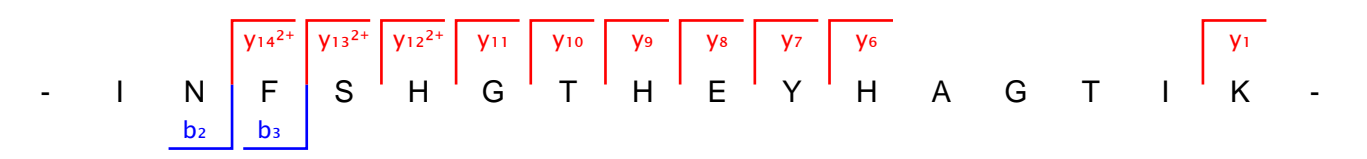

Raw file: 2015-01-05\_CL03\_XenEmb\_x2  
 Scan: 20486 Method: ITMS; HCD Score: 57.29 m/z: 453.72

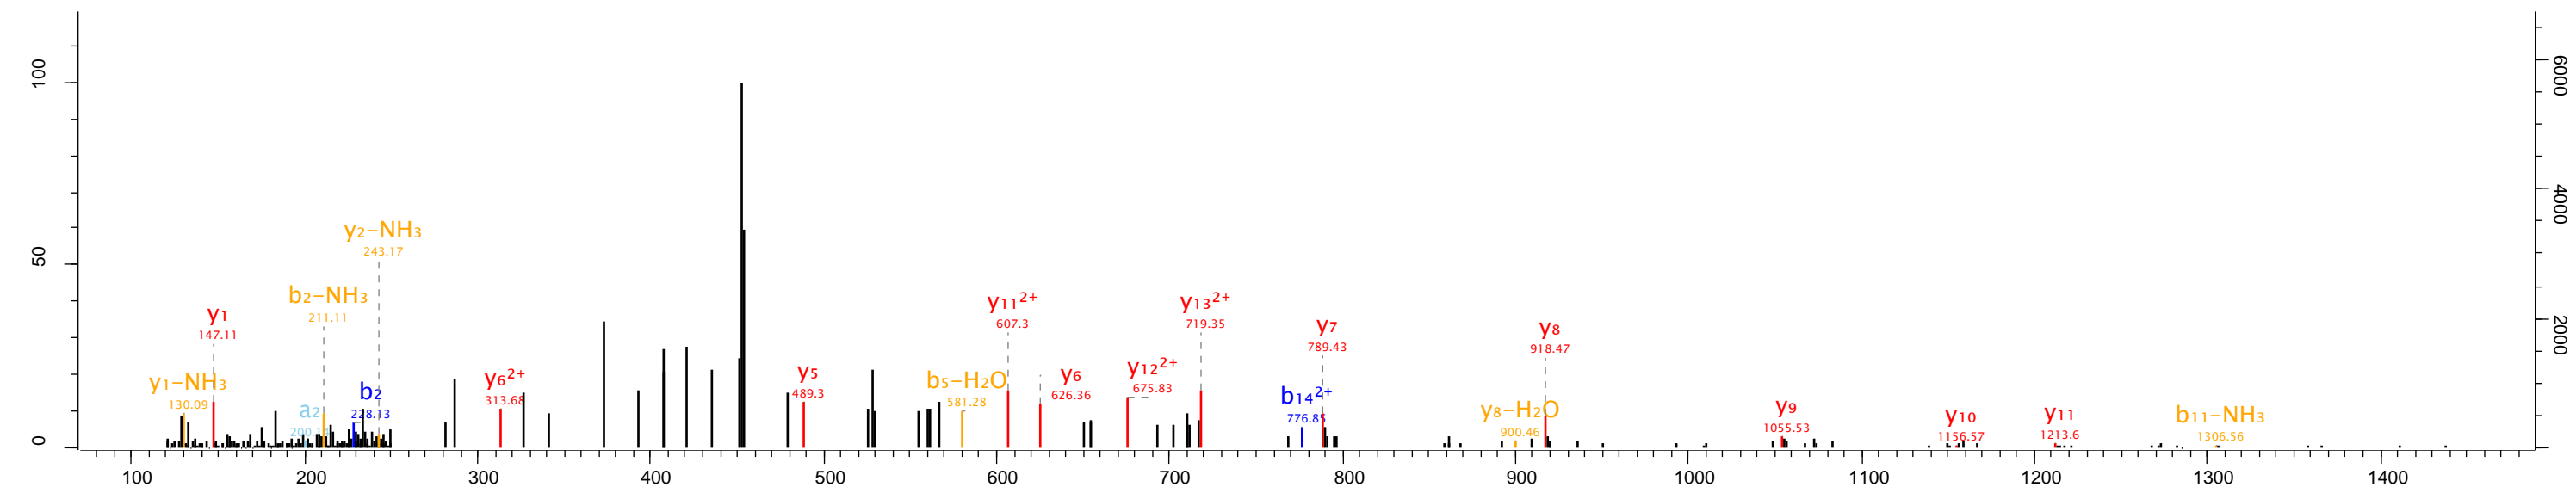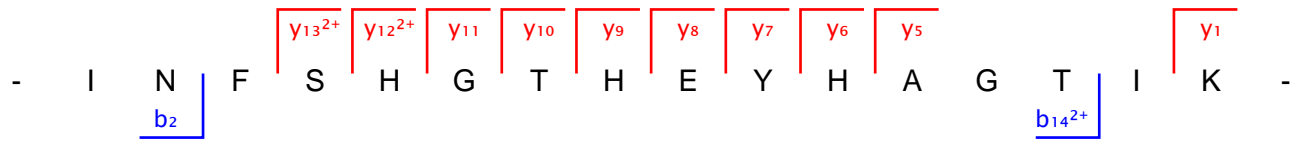

Spectral Annotation for Single-Peptide IDs in 16-cell Embryo using Q-OT-LIT

Raw file: 2015-01-05\_CL03\_XenEmb\_x2  
 Scan: 20538  
 Method: ITMS; HCD  
 Score: 72.34  
 m/z: 422.58

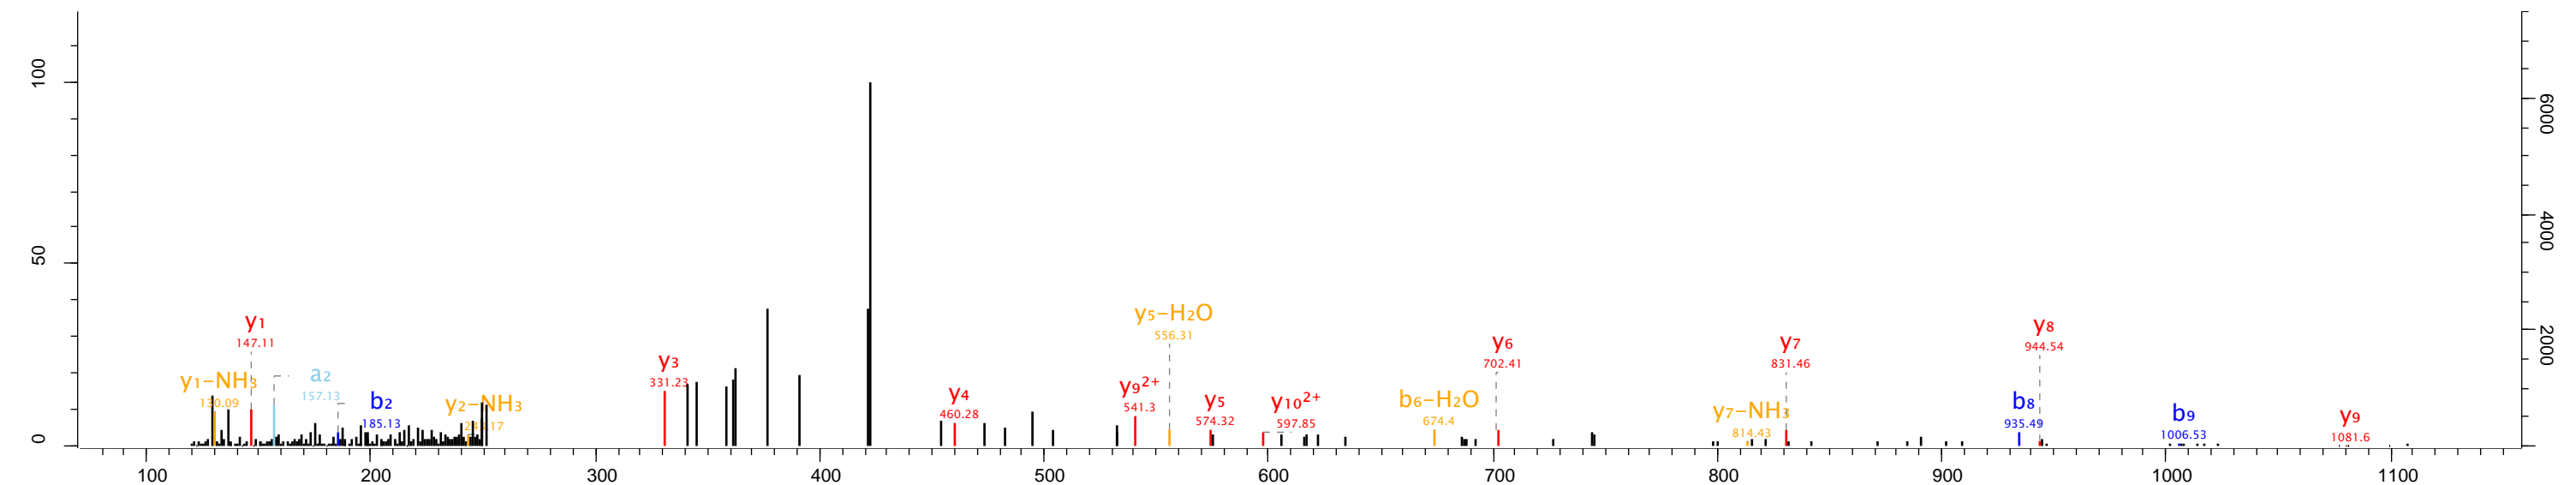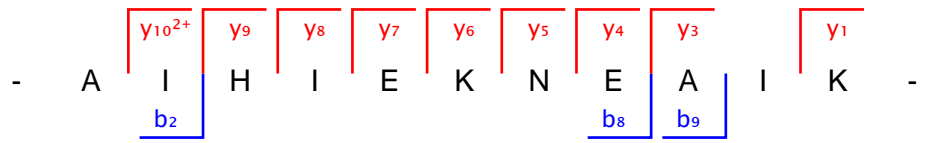

Raw file: 2015-01-05\_CL03\_XenEmb\_x2  
 Scan: 20556 Method: ITMS; HCD Score: 56.55 m/z: 422.58

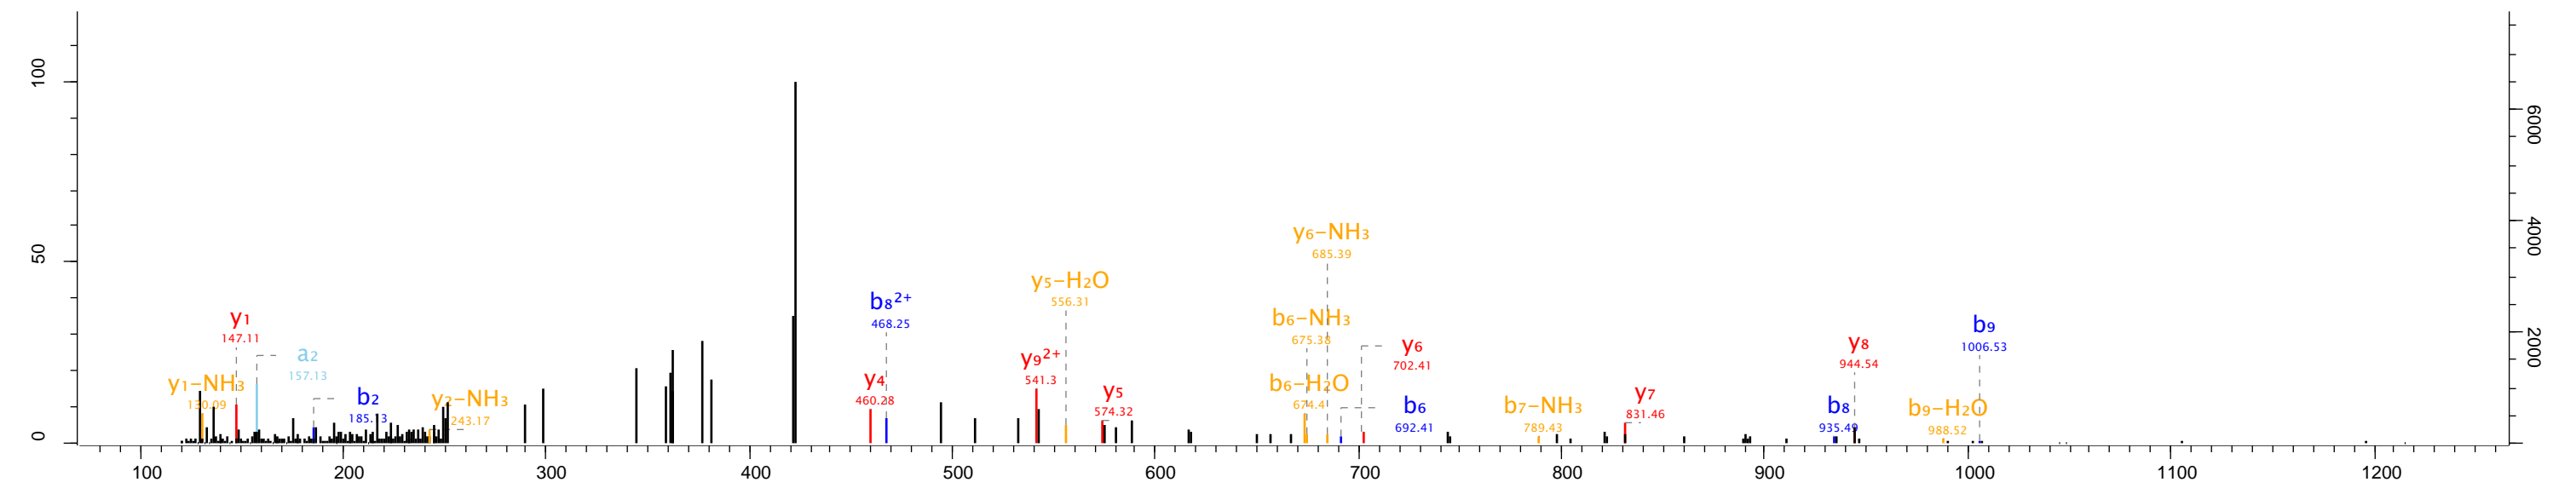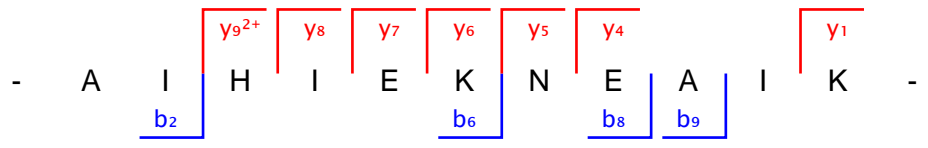

Spectral Annotation for Single-Peptide IDs in 16-cell Embryo using Q-OT-LIT

Raw file 2015-01-05\_CL03\_XenEmb\_x2 Scan 20780 Method ITMS; HCD Score 45.61 m/z 468.5

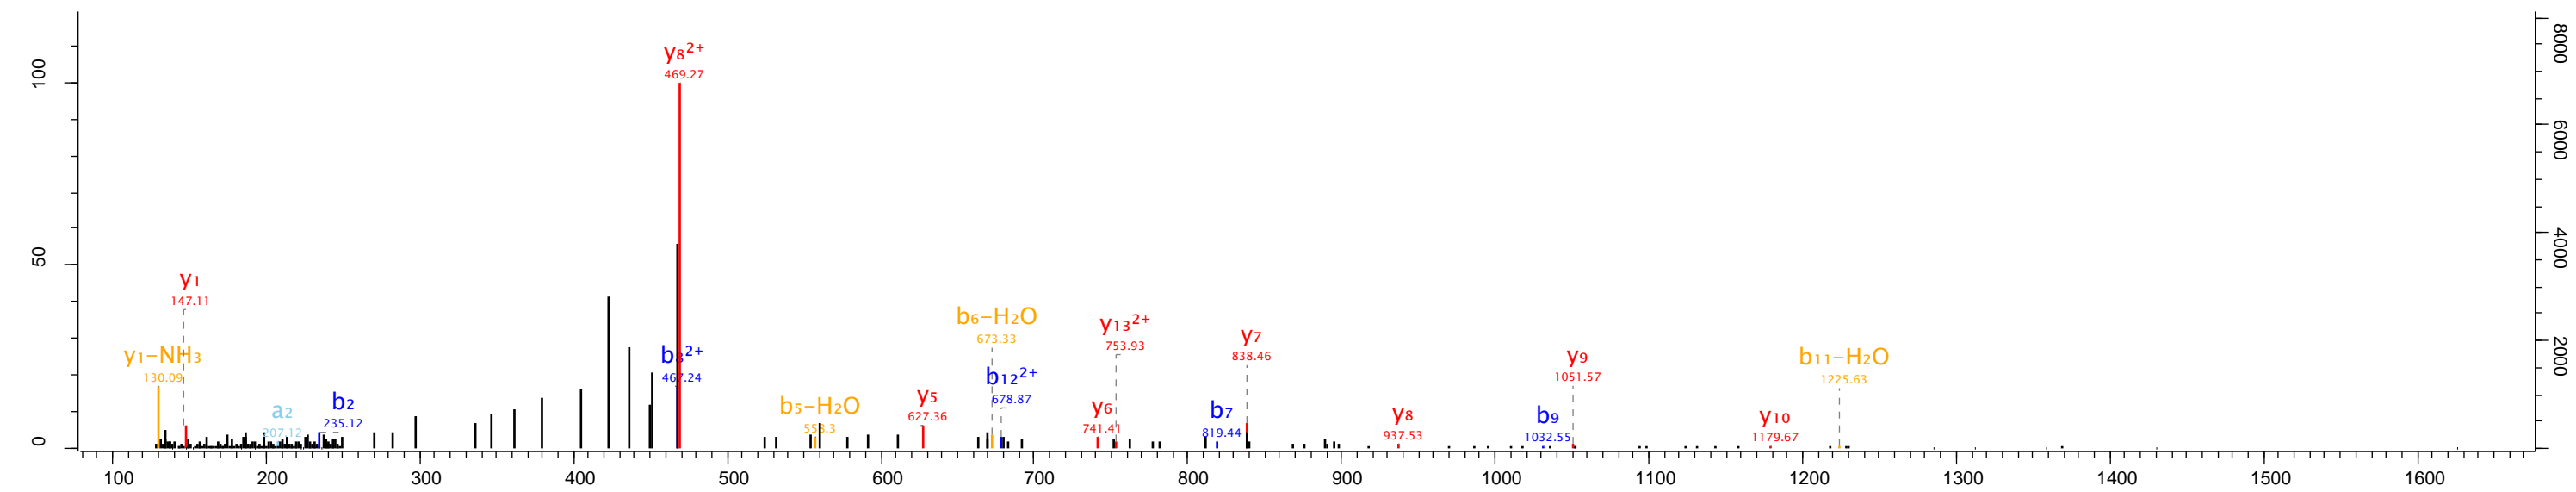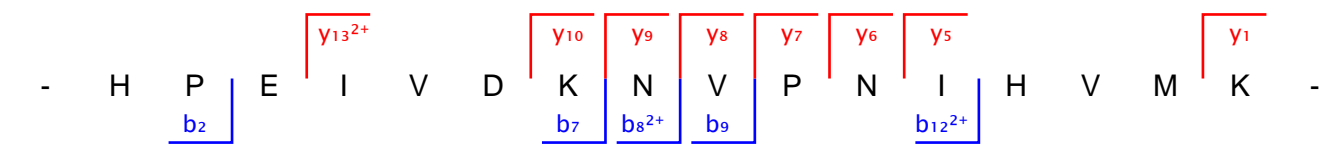

Raw file: 2015-01-05\_CL03\_XenEmb\_x2  
 Scan: 20803  
 Method: ITMS; HCD  
 Score: 33.84  
 m/z: 468.5

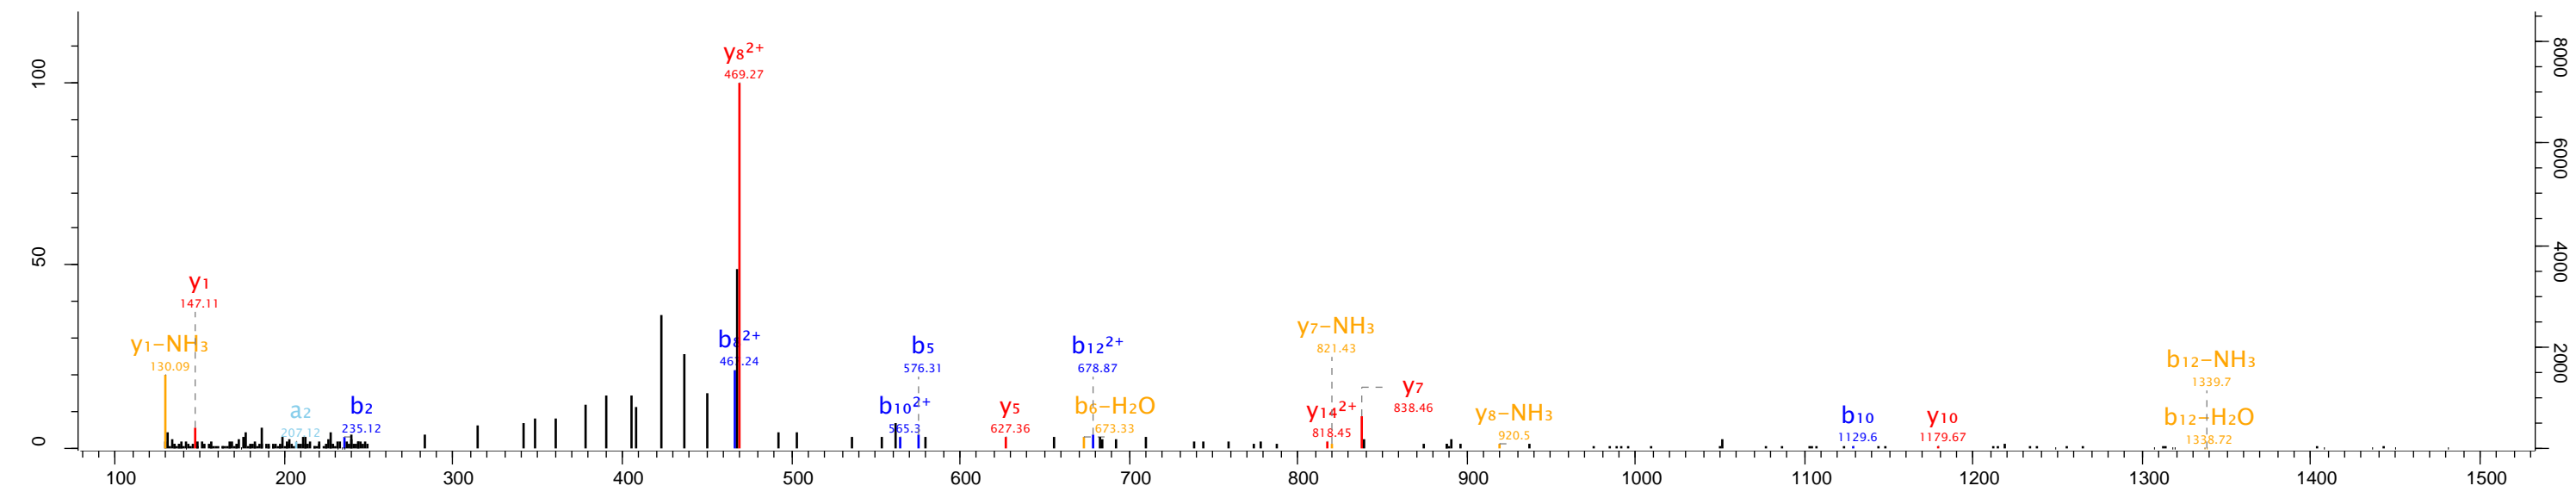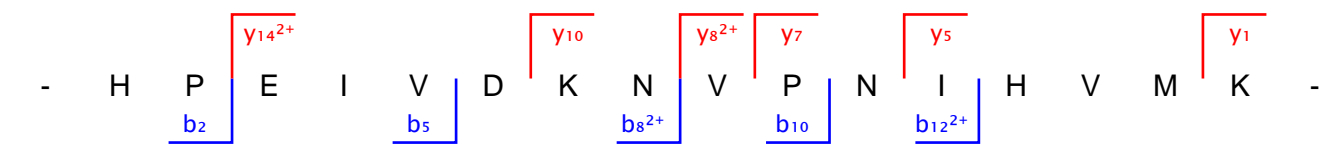



Raw file: 2015-01-05\_CL03\_XenEmb\_x2  
 Scan: 20937  
 Method: ITMS; HCD  
 Score: 44.61  
 m/z: 470.23

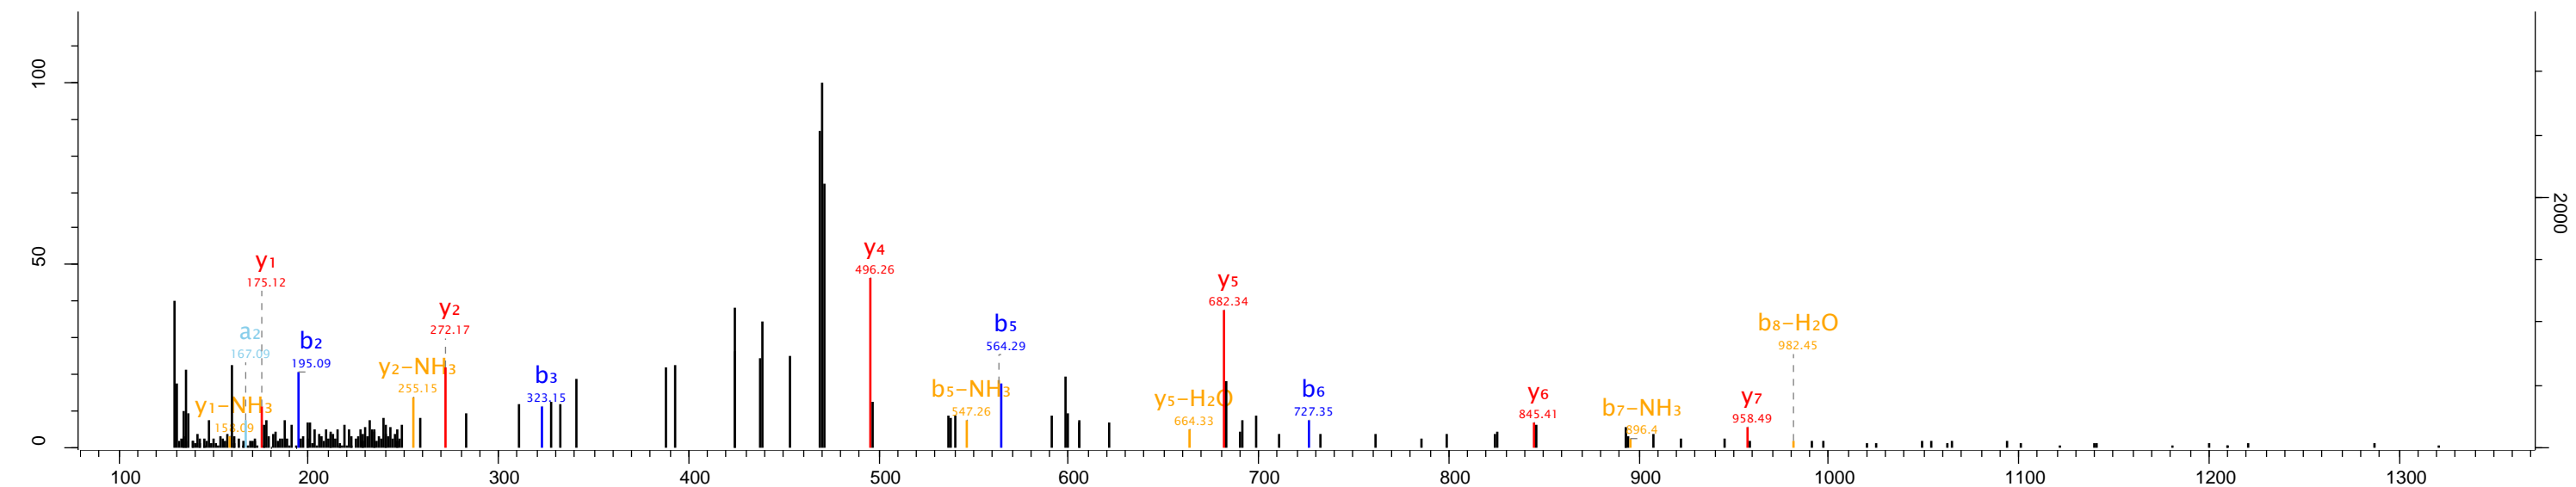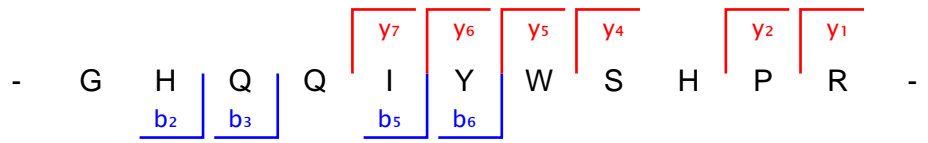

Raw file: 2015-01-05\_CL03\_XenEmb\_x2  
 Scan: 20946 Method: ITMS; HCD Score: 50.48 m/z: 470.23

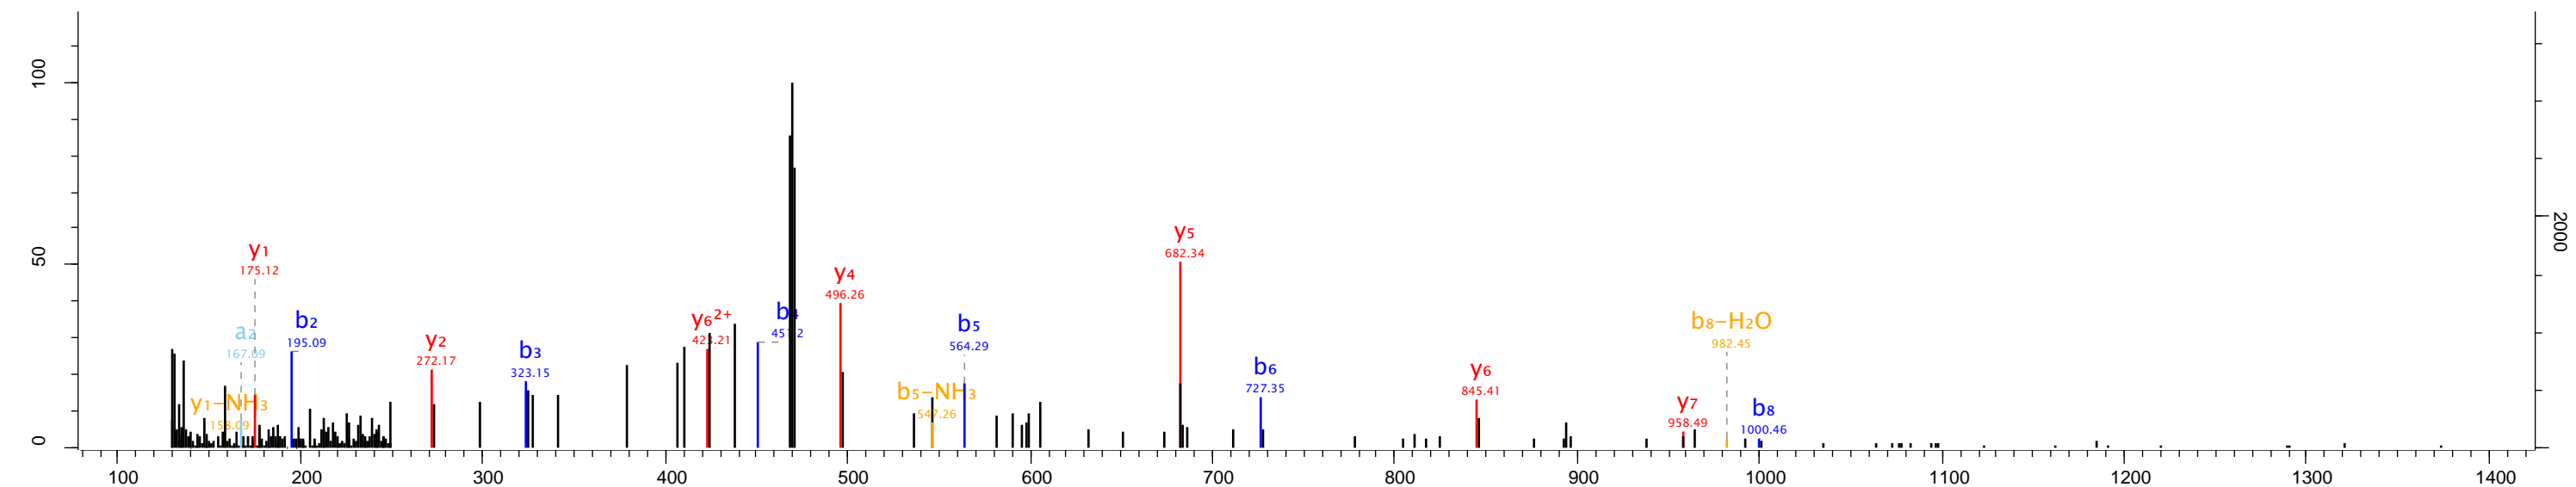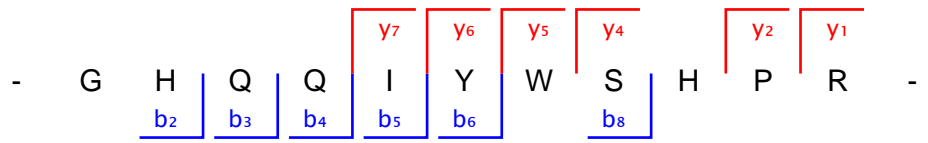

Spectral Annotation for Single-Peptide IDs in 16-cell Embryo using Q-OT-LIT

Raw file: 2015-01-05\_CL03\_XenEmb\_x2  
 Scan: 20950 Method: ITMS; HCD Score: 72.29 m/z: 470.57

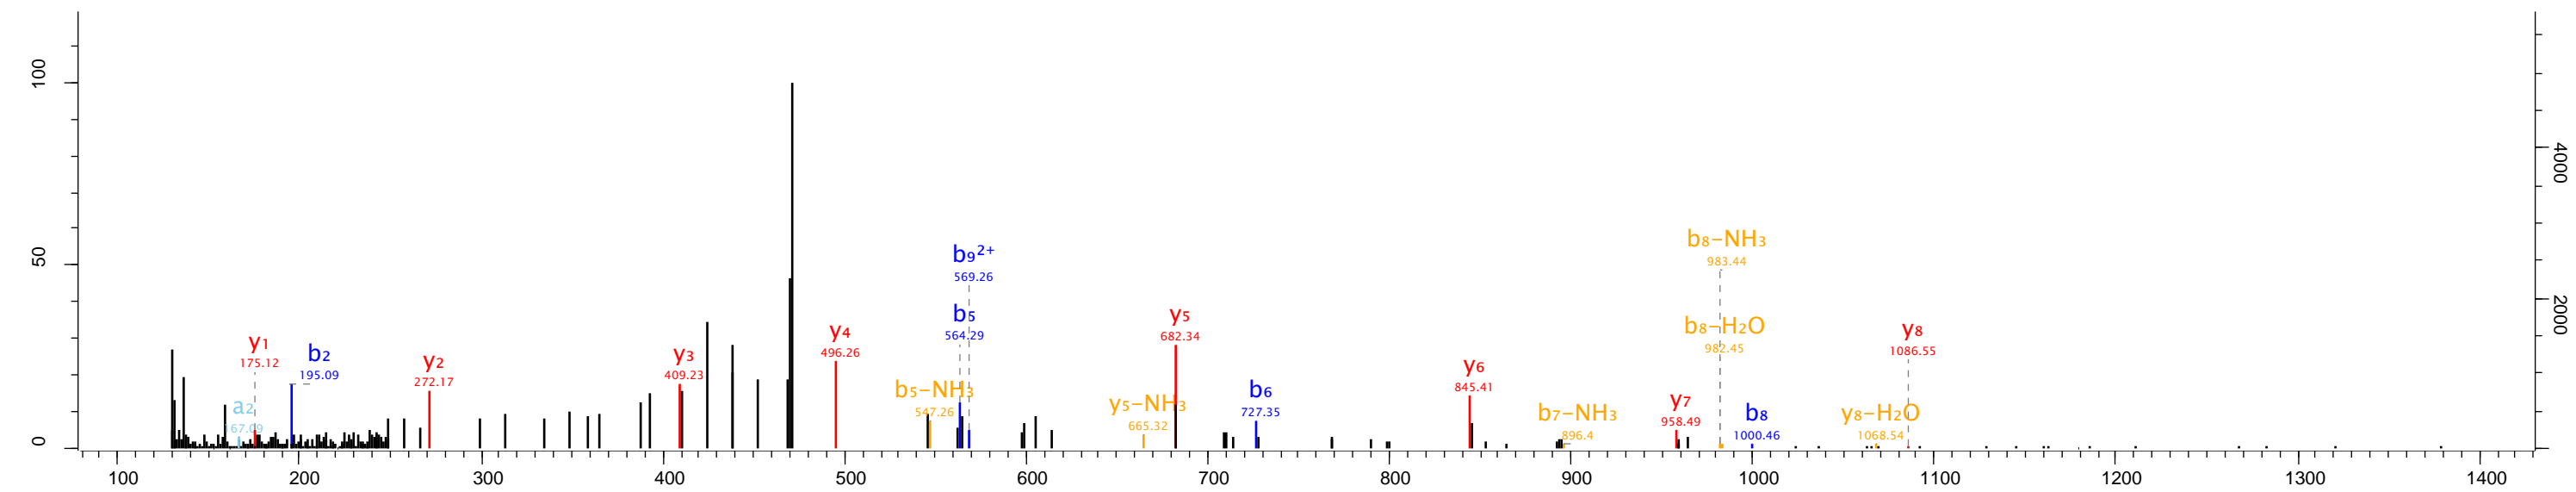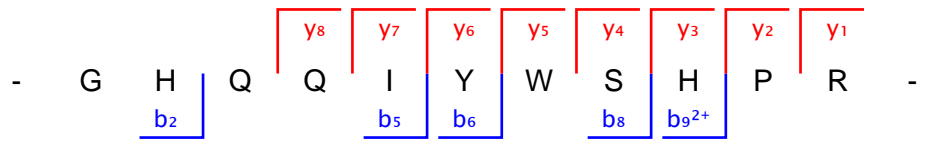

Spectral Annotation for Single-Peptide IDs in 16-cell Embryo using Q-OT-LIT

Raw file 2015-01-05\_CL03\_XenEmb\_x2 Scan 21208 Method ITMS; HCD Score 74.39 m/z 465.59

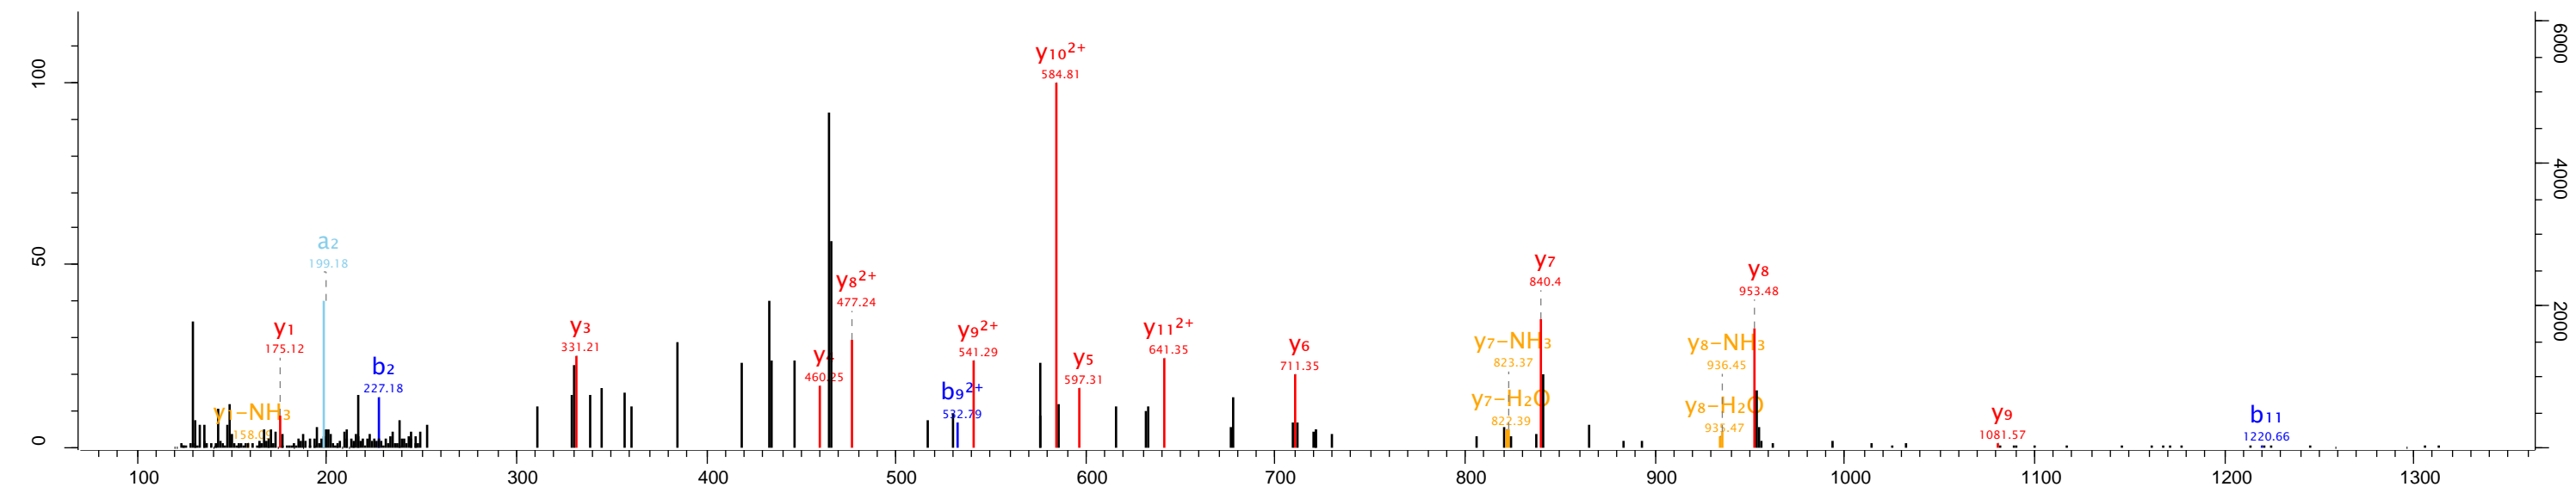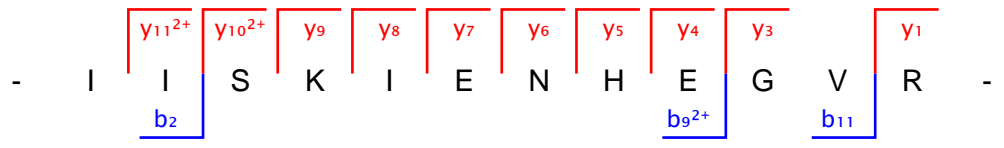

Spectral Annotation for Single-Peptide IDs in 16-cell Embryo using Q-OT-LIT

Raw file: 2015-01-05\_CL03\_XenEmb\_x2  
 Scan: 21218  
 Method: ITMS; HCD  
 Score: 99.54  
 m/z: 465.59

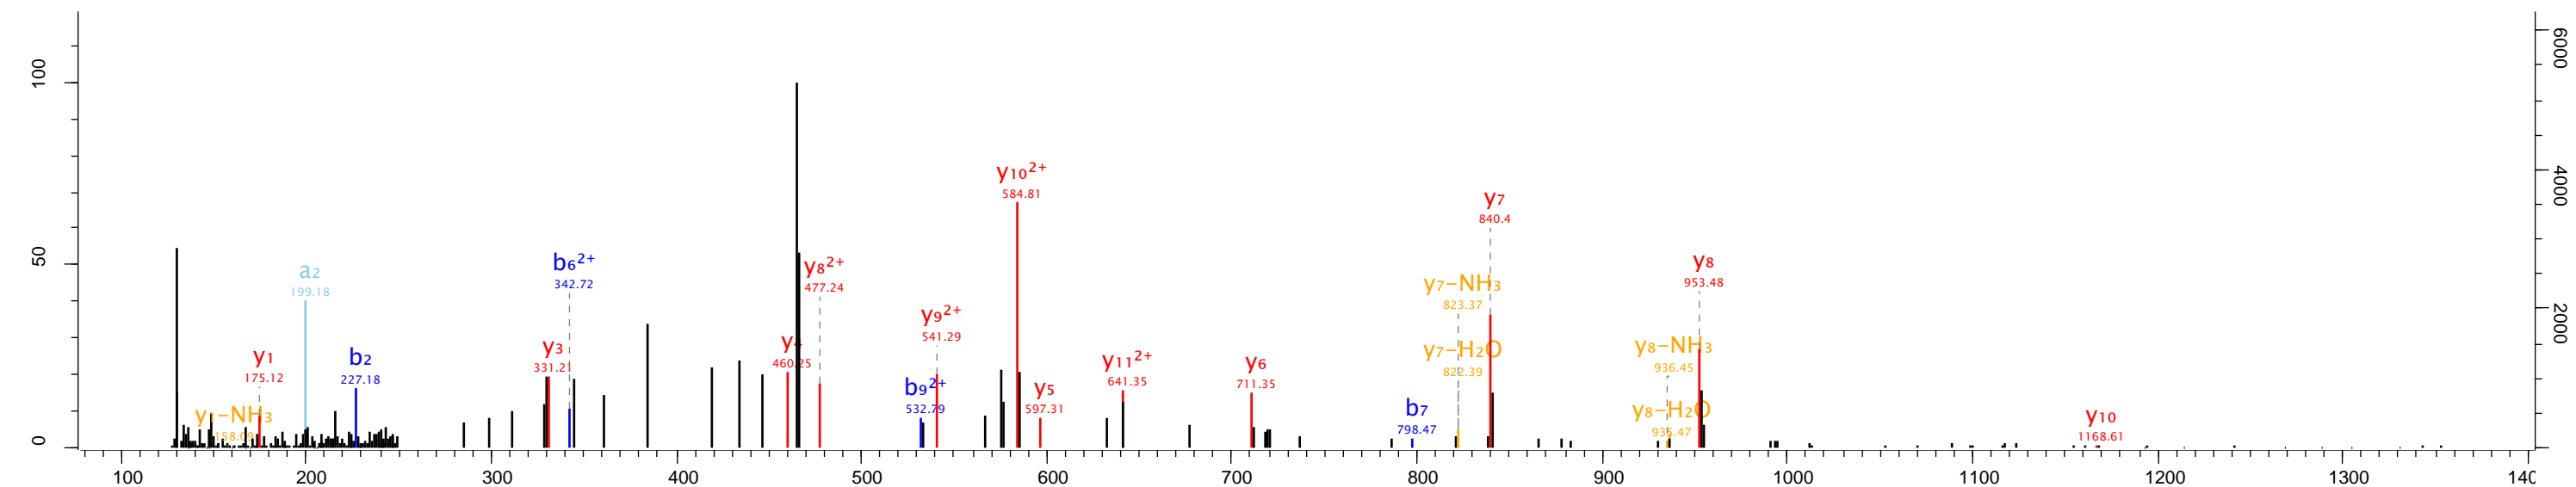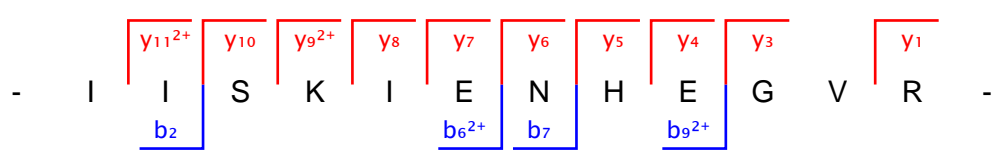

Spectral Annotation for Single-Peptide IDs in 16-cell Embryo using Q-OT-LIT

Raw file 2015-01-05\_CL03\_XenEmb\_x2 Scan 22155 Method ITMS; HCD Score 58.27 m/z 486.95

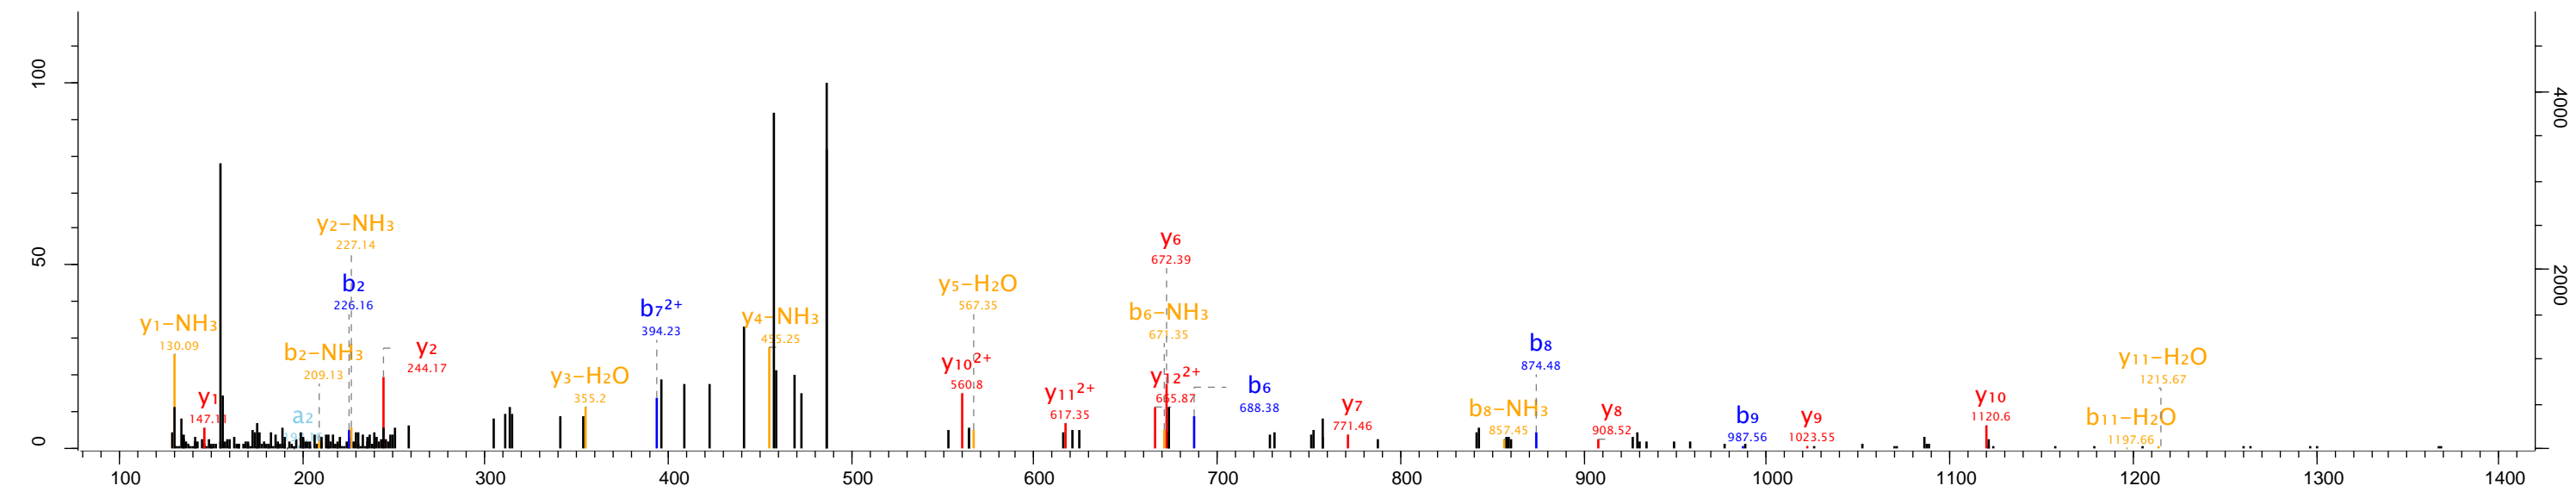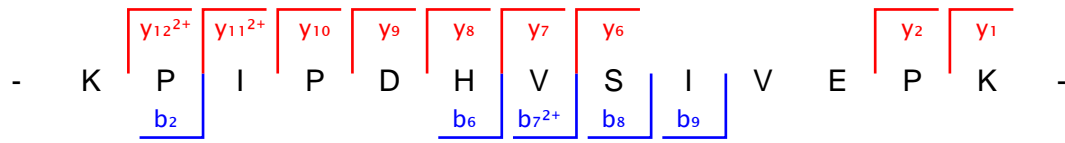

Spectral Annotation for Single-Peptide IDs in 16-cell Embryo using Q-OT-LIT

Raw file: 2015-01-05\_CL03\_XenEmb\_x2  
 Scan: 22350 Method: ITMS; HCD Score: 106.68 m/z: 492.28

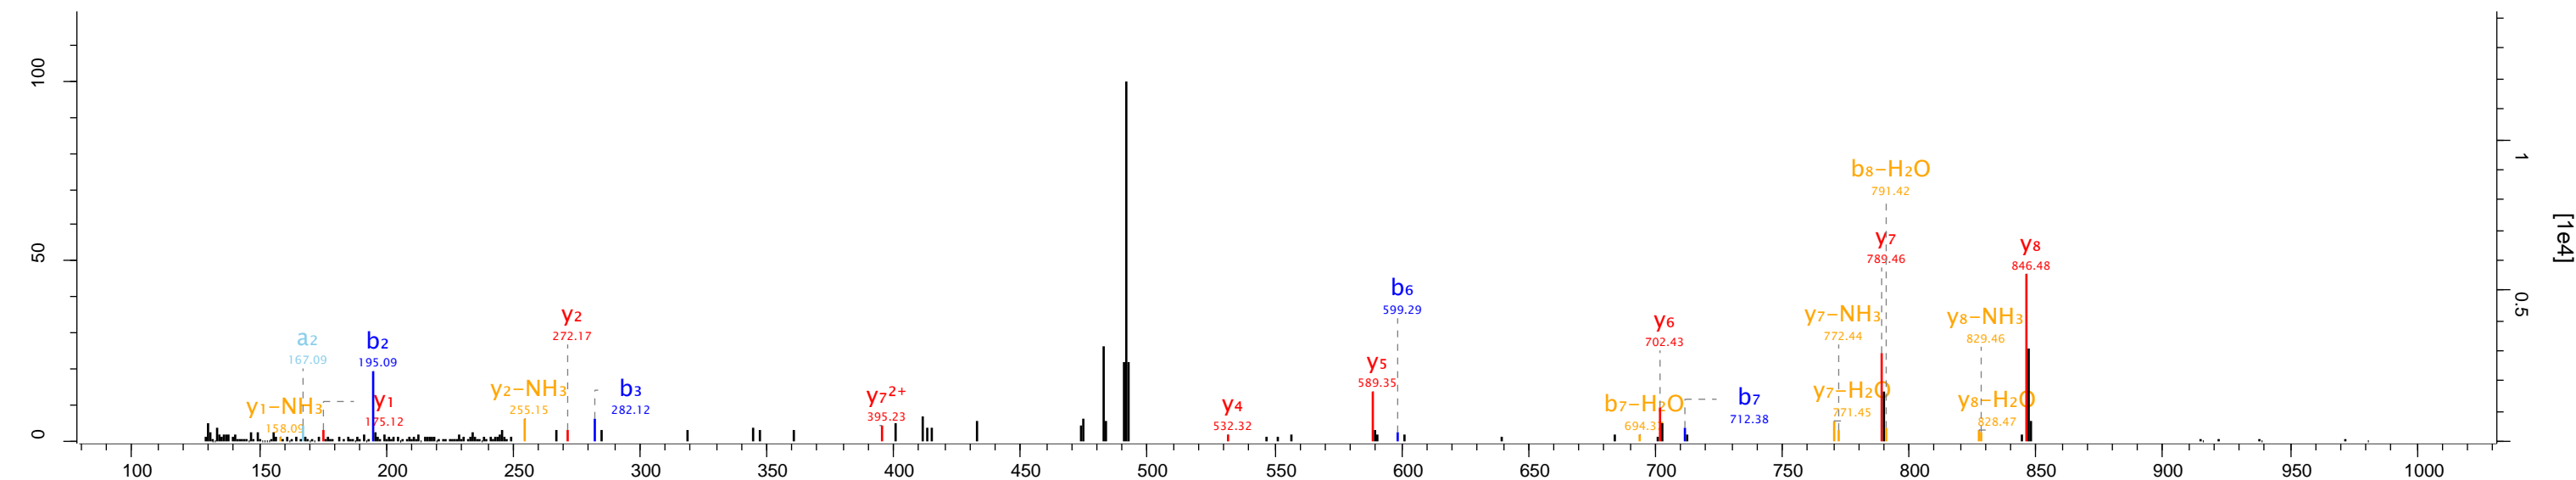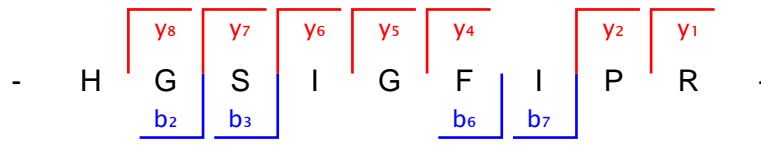

Raw file 2015-01-05\_CL03\_XenEmb\_x2 Scan 22389 Method ITMS; HCD Score 117.81 m/z 492.27

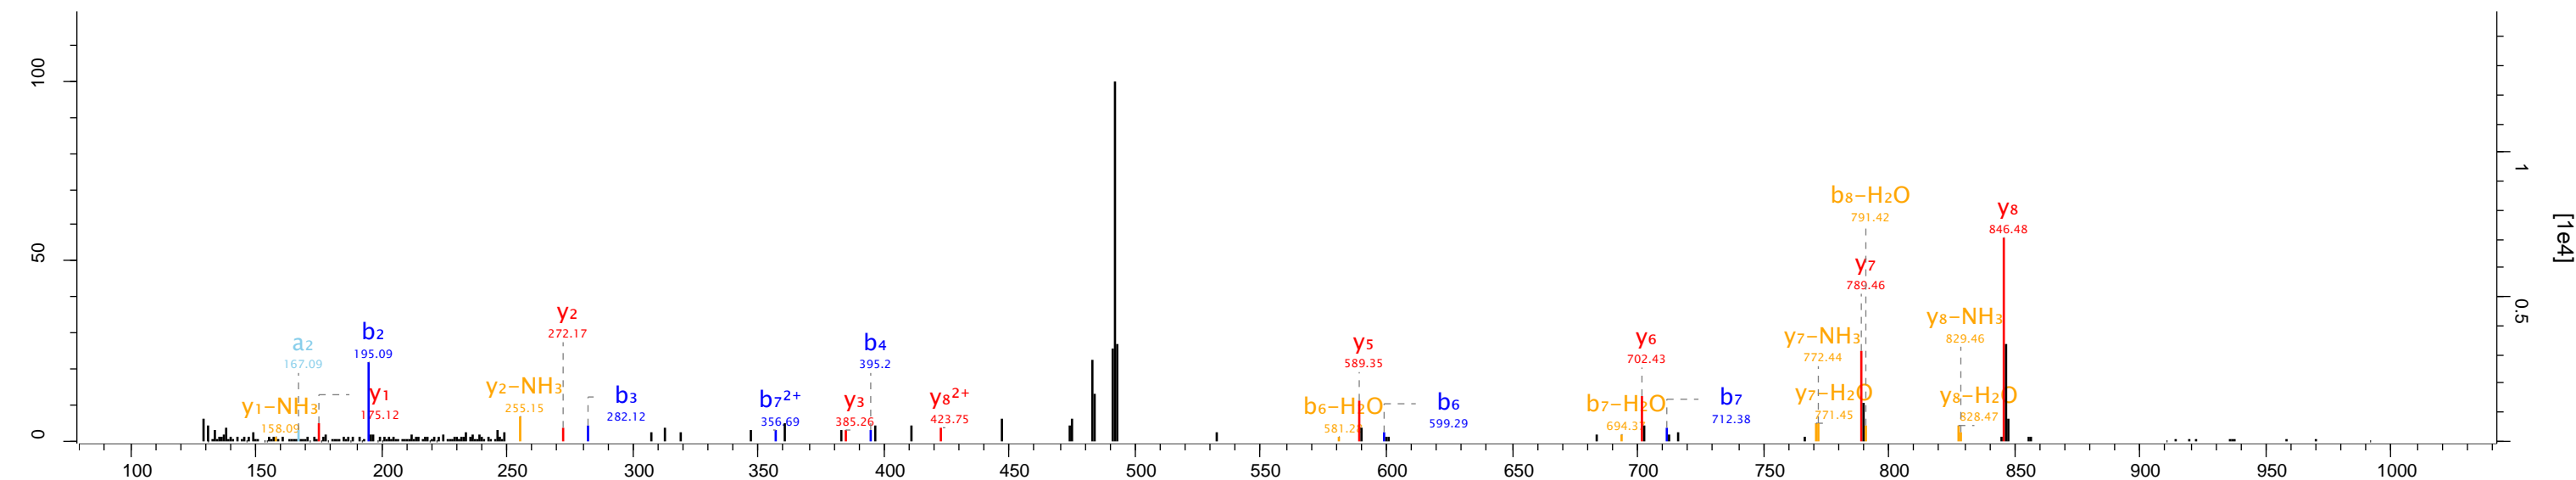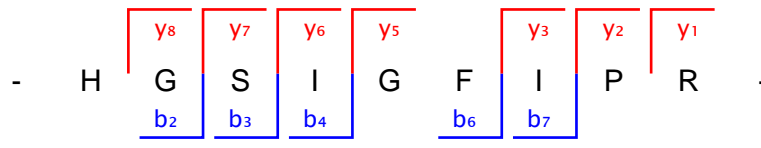



Raw file 2015-01-05\_CL03\_XenEmb\_x2 Scan 22441 Method ITMS; HCD Score 69.46 m/z 525.97

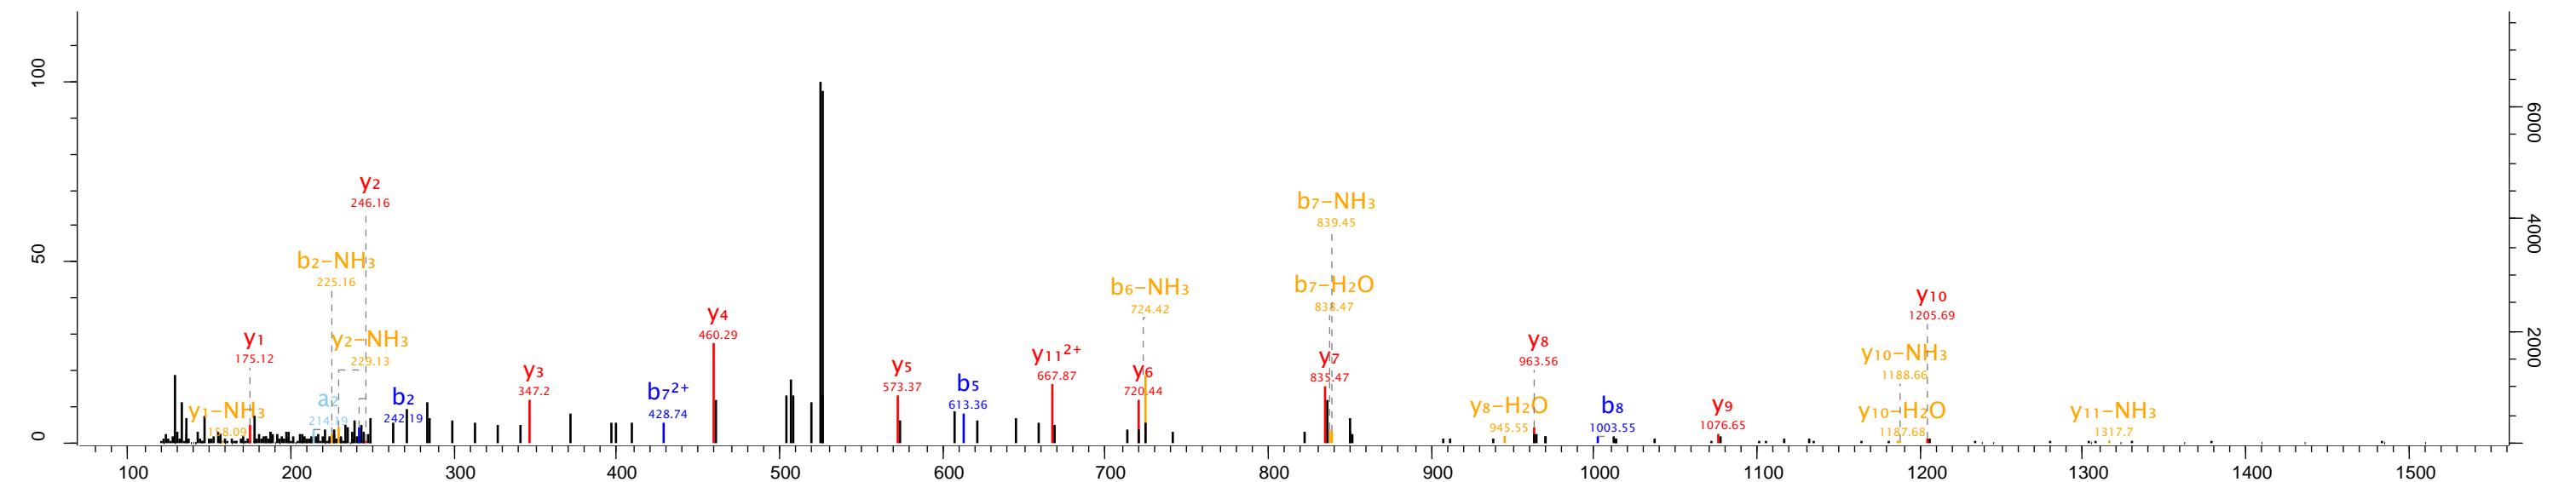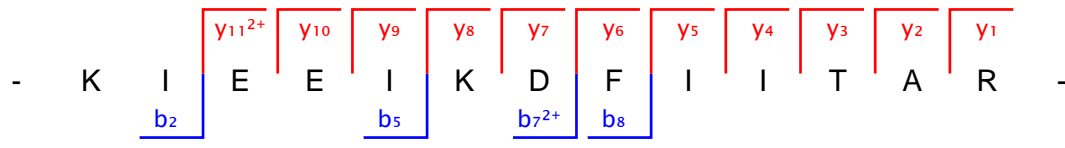

Spectral Annotation for Single-Peptide IDs in 16-cell Embryo using Q-OT-LIT

Raw file 2015-01-05\_CL03\_XenEmb\_x2 Scan 22451 Method ITMS; HCD Score 67.1 m/z 526.31

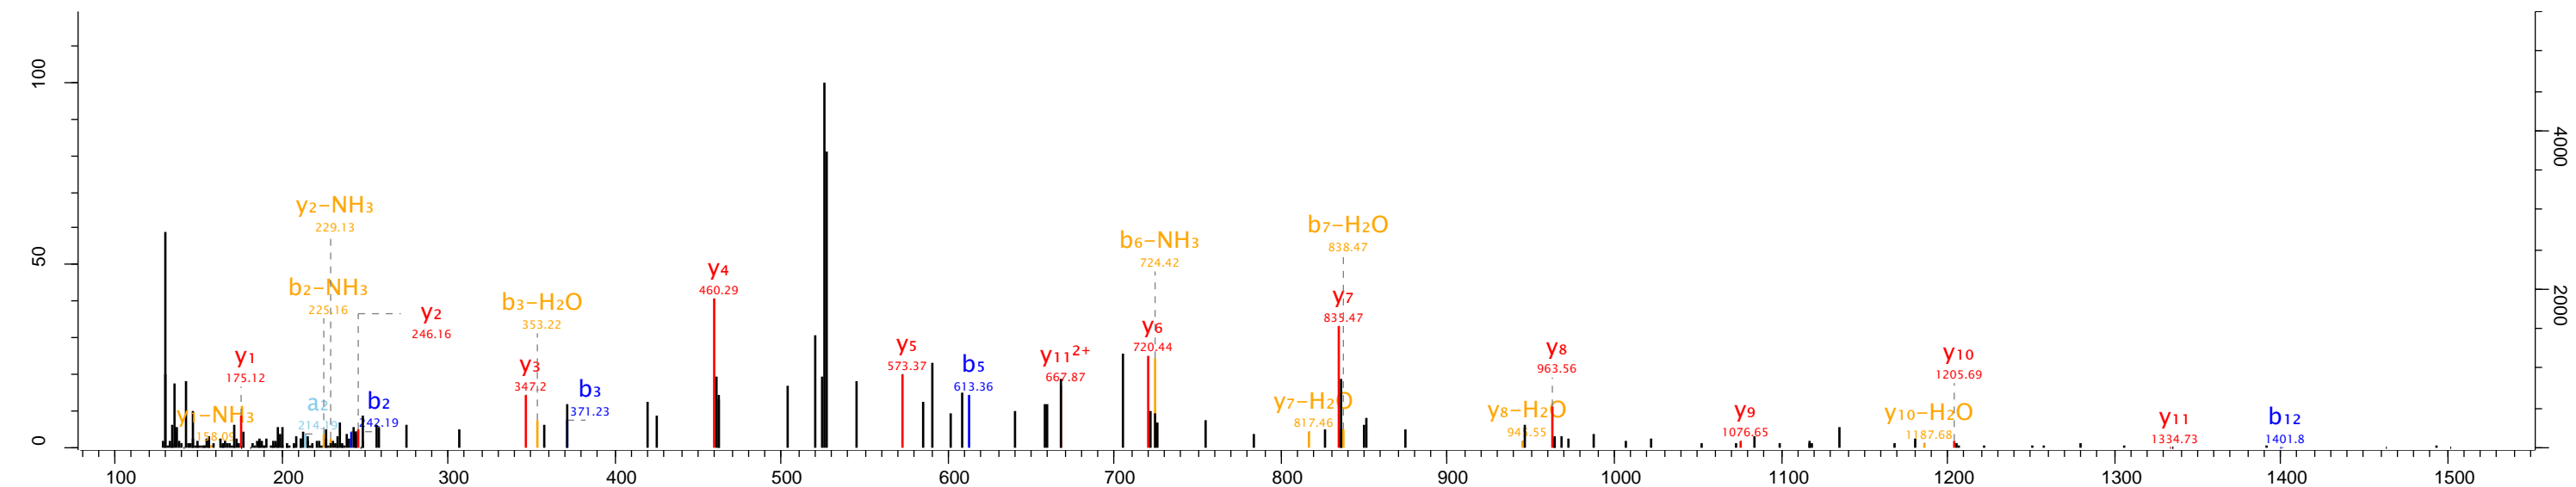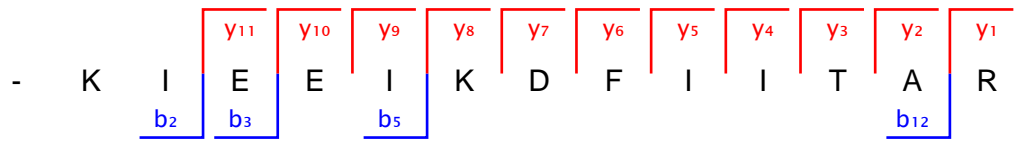

Spectral Annotation for Single-Peptide IDs in 16-cell Embryo using Q-OT-LIT

Raw file: 2015-01-05\_CL03\_XenEmb\_x2  
 Scan: 22480 Method: ITMS; HCD Score: 64.37 m/z: 537.61

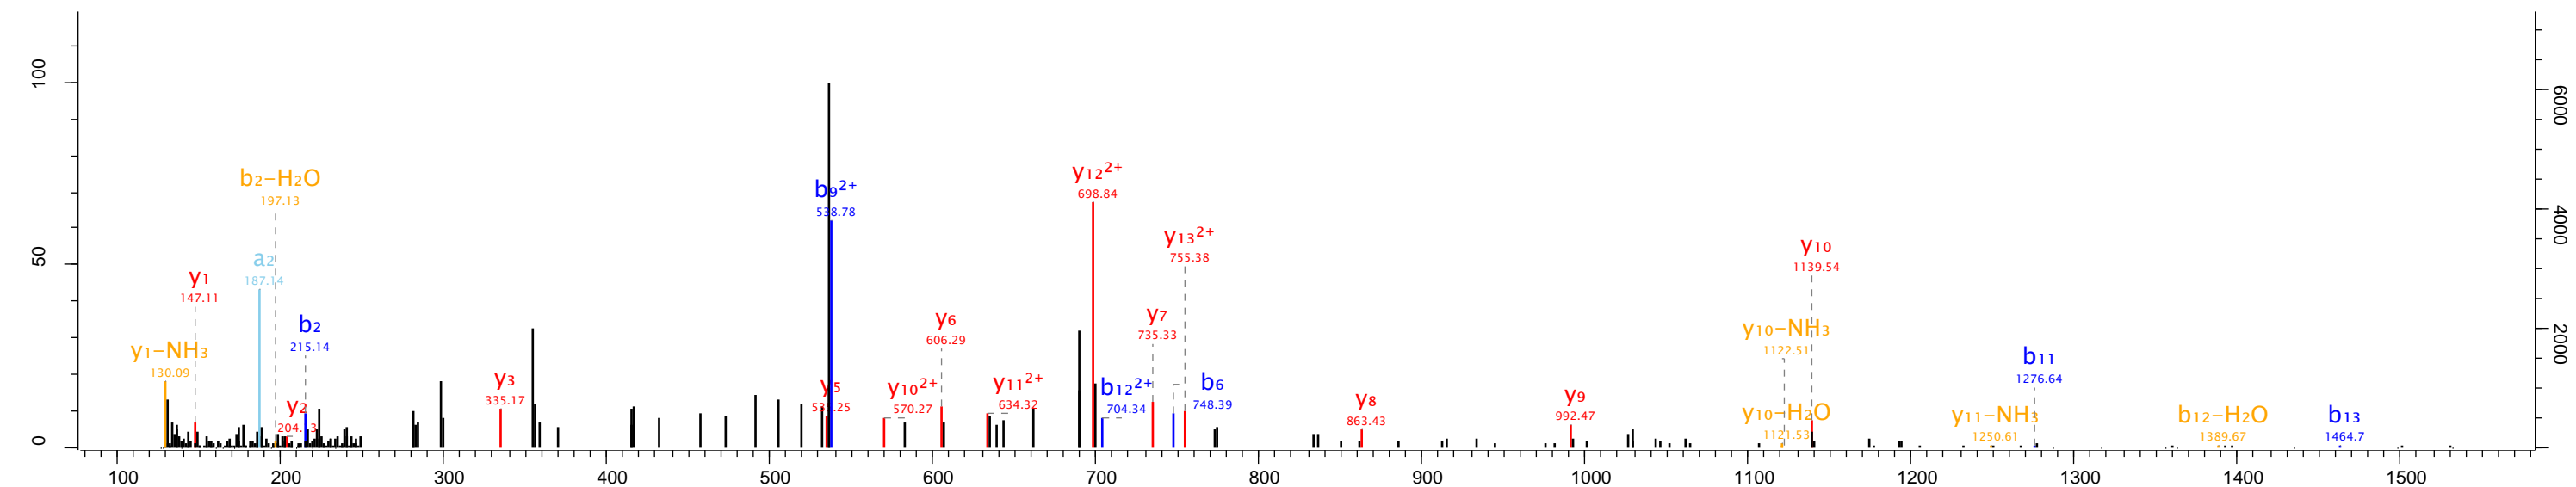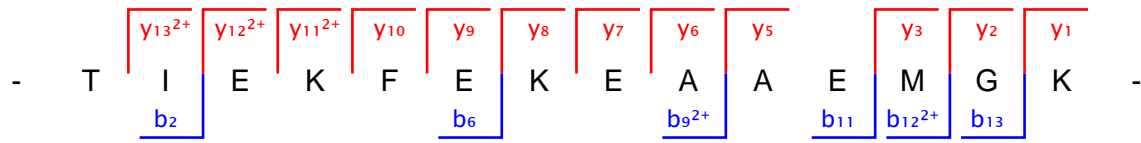

Spectral Annotation for Single-Peptide IDs in 16-cell Embryo using Q-OT-LIT

Raw file: 2015-01-05\_CL03\_XenEmb\_x2  
 Scan: 22784  
 Method: ITMS; HCD  
 Score: 115.37  
 m/z: 530.59

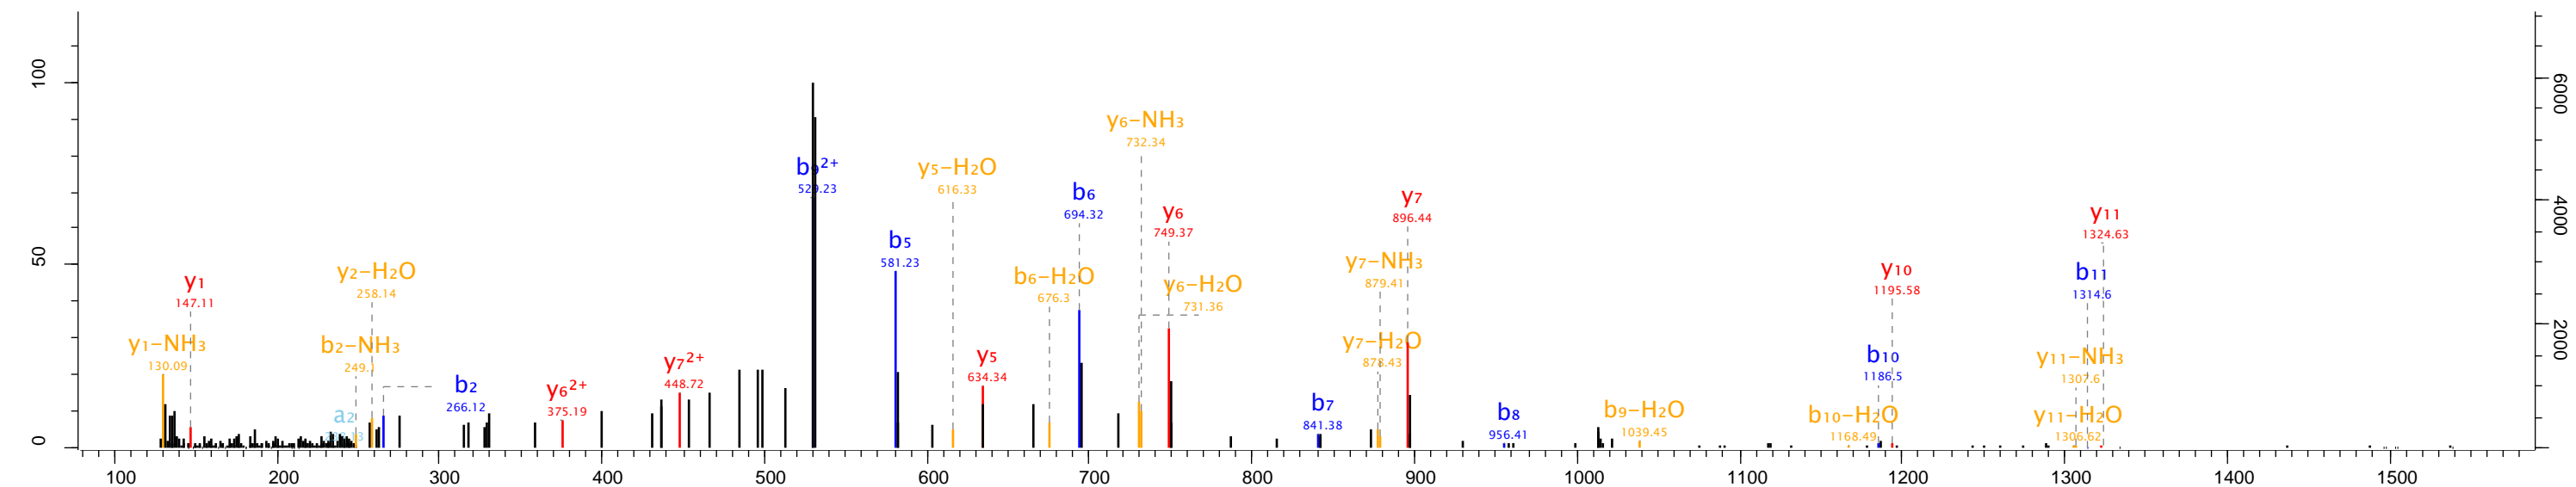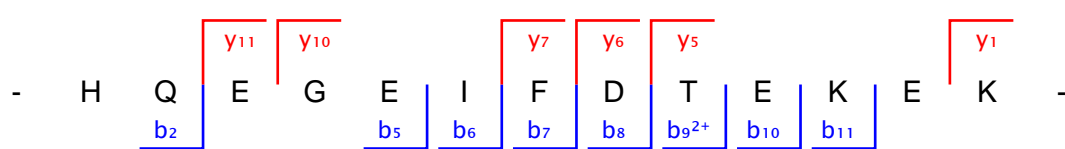

Raw file: 2015-01-05\_CL03\_XenEmb\_x2  
 Scan: 22805 Method: ITMS; HCD Score: 59.75 m/z: 530.58

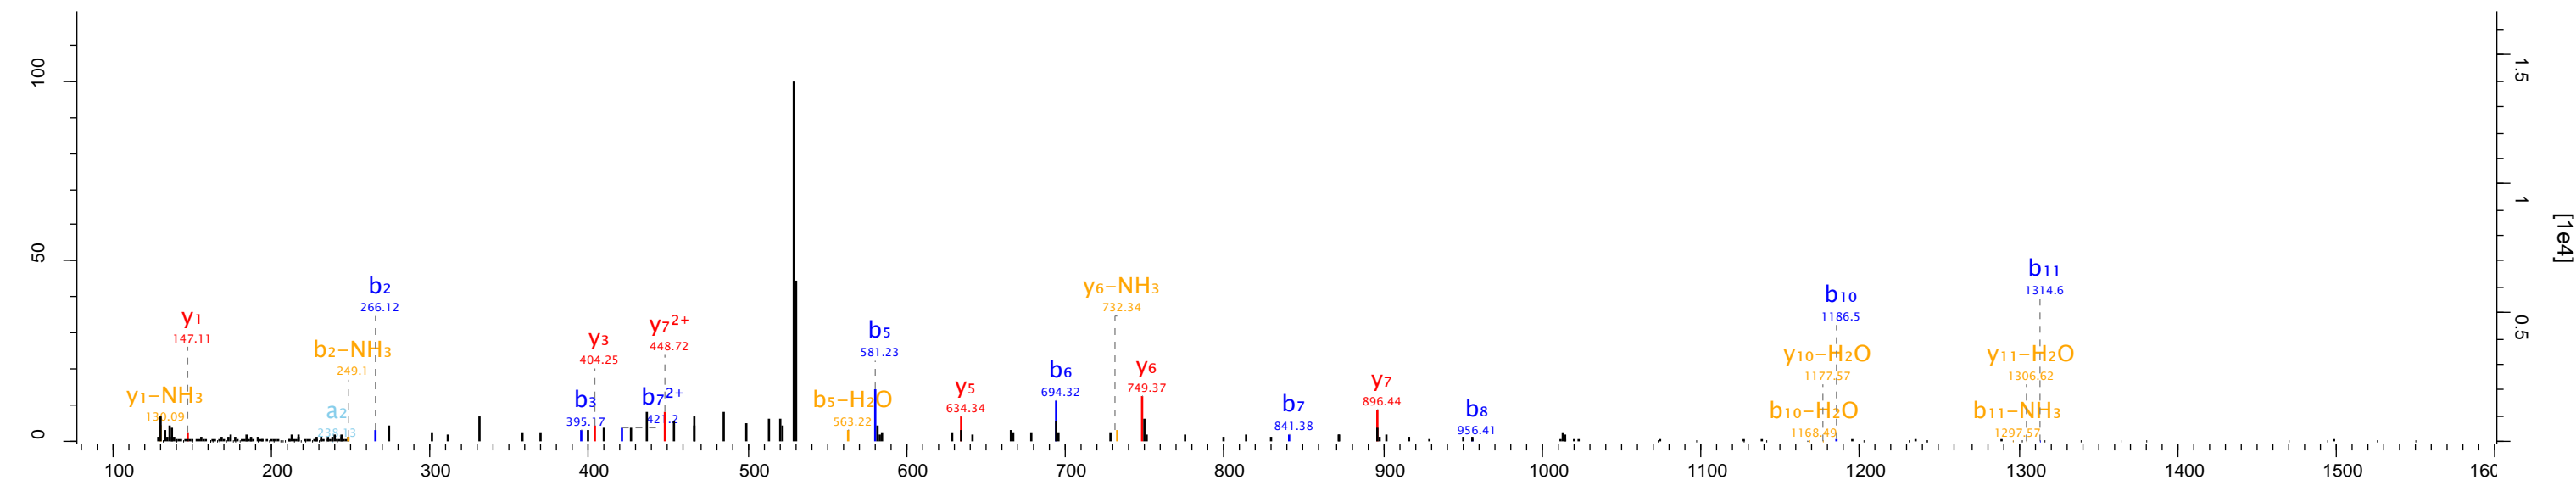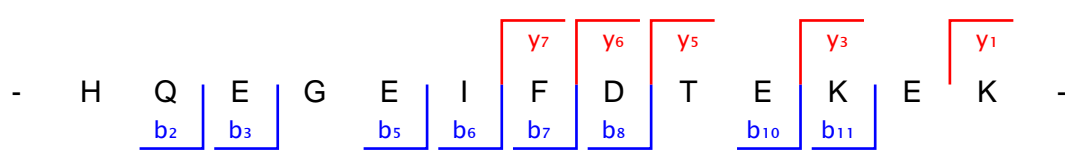

Raw file 2015-01-05\_CL03\_XenEmb\_x2 Scan 23809 Method ITMS; HCD Score 113.44 m/z 572.8

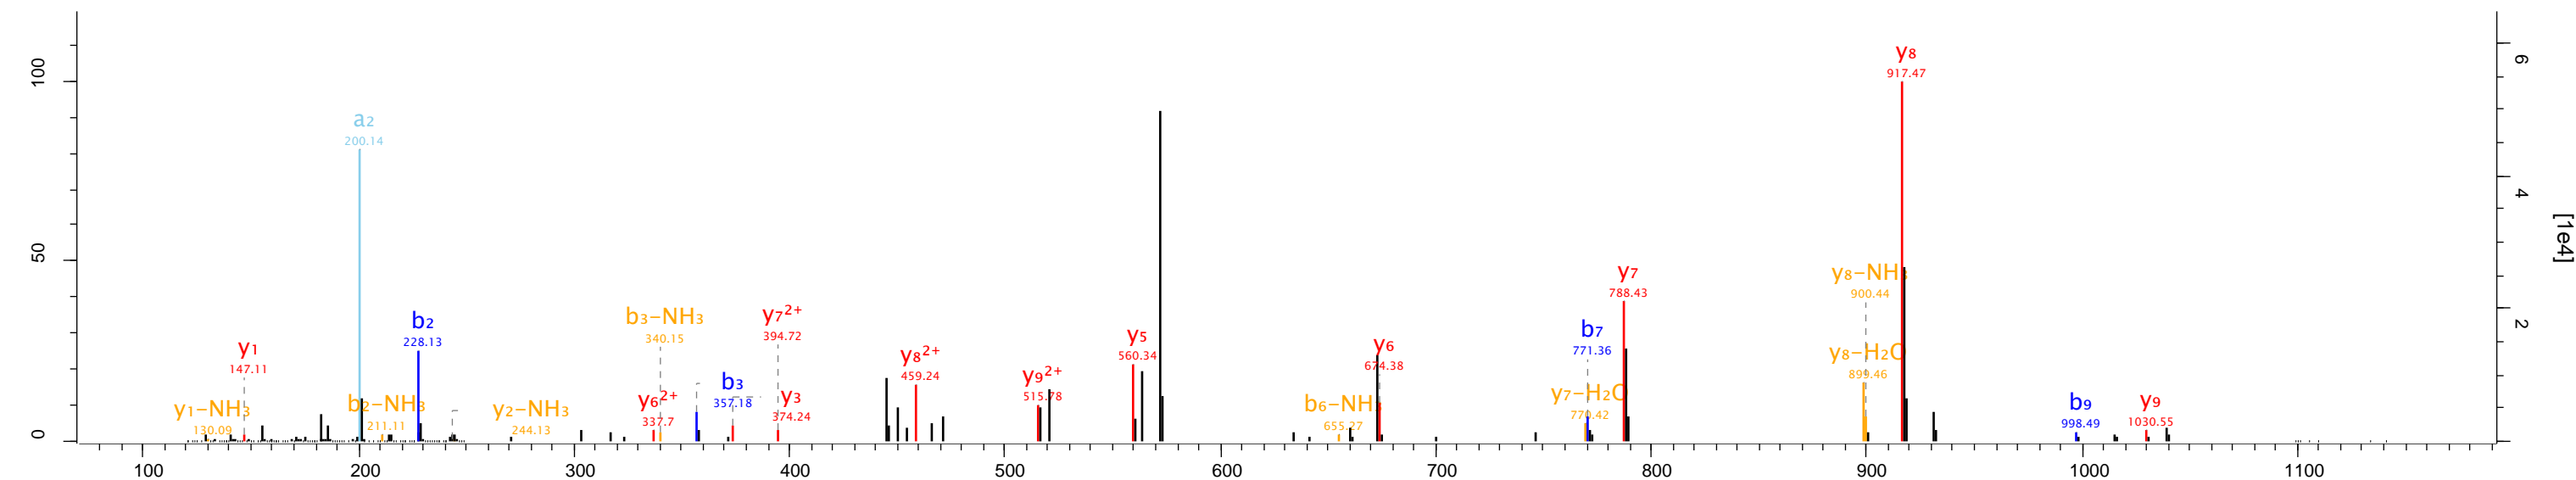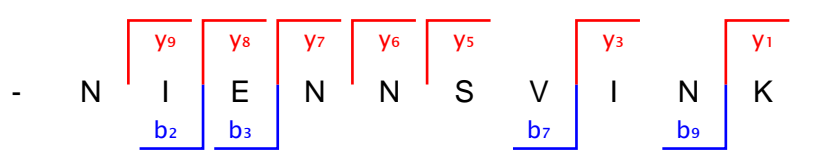

Raw file 2015-01-05\_CL03\_XenEmb\_x2 Scan 23821 Method ITMS; HCD Score 123.96 m/z 572.8

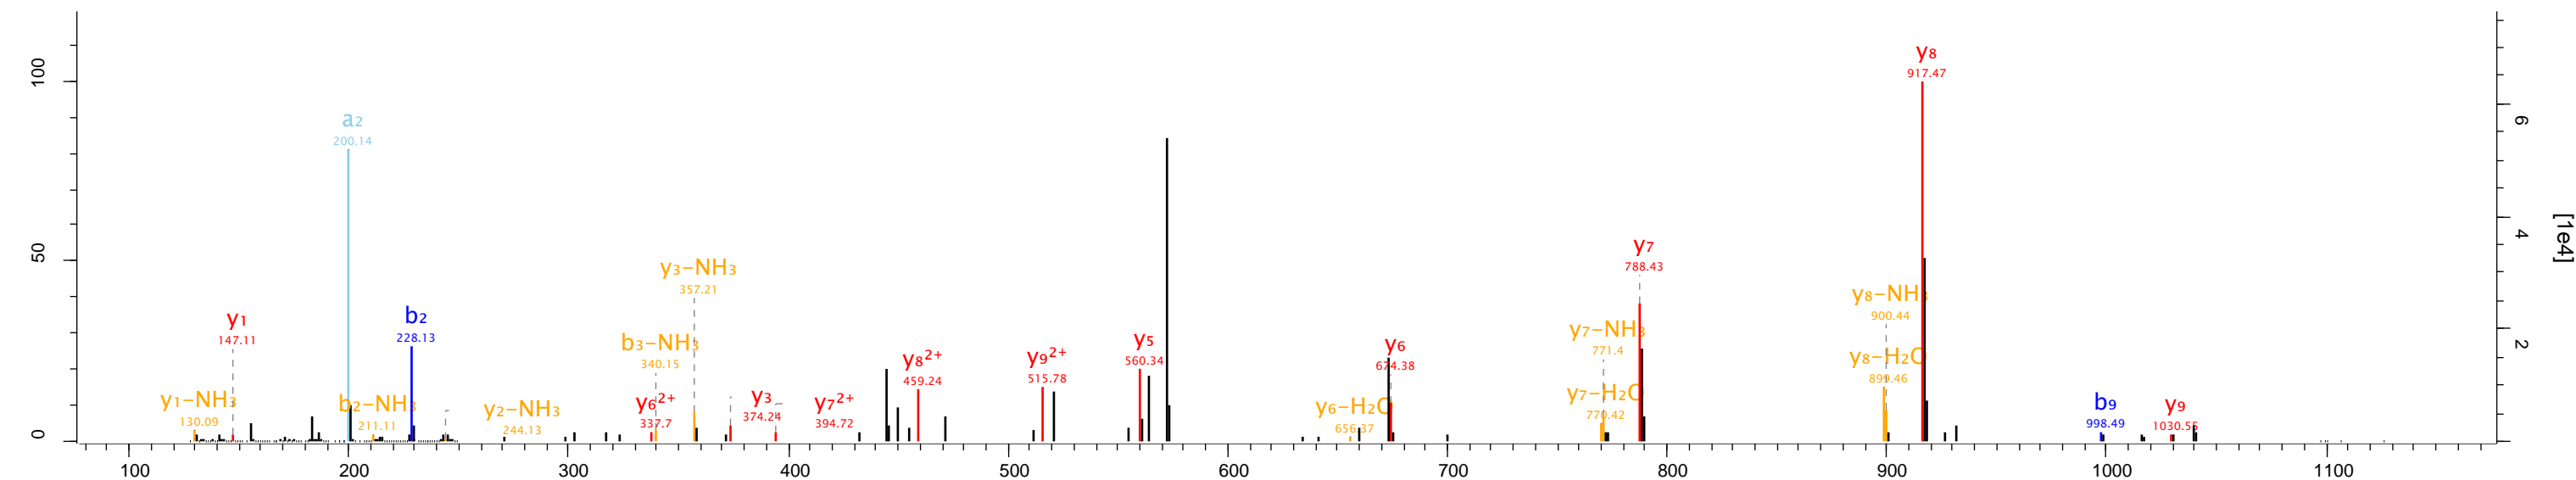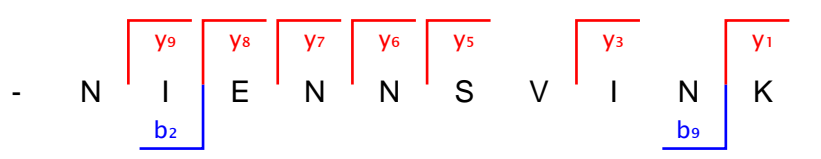

Spectral Annotation for Single-Peptide IDs in 16-cell Embryo using Q-OT-LIT

Raw file: 2015-01-05\_CL03\_XenEmb\_x2  
 Scan: 23822 Method: ITMS; HCD Score: 97.6 m/z: 382.2

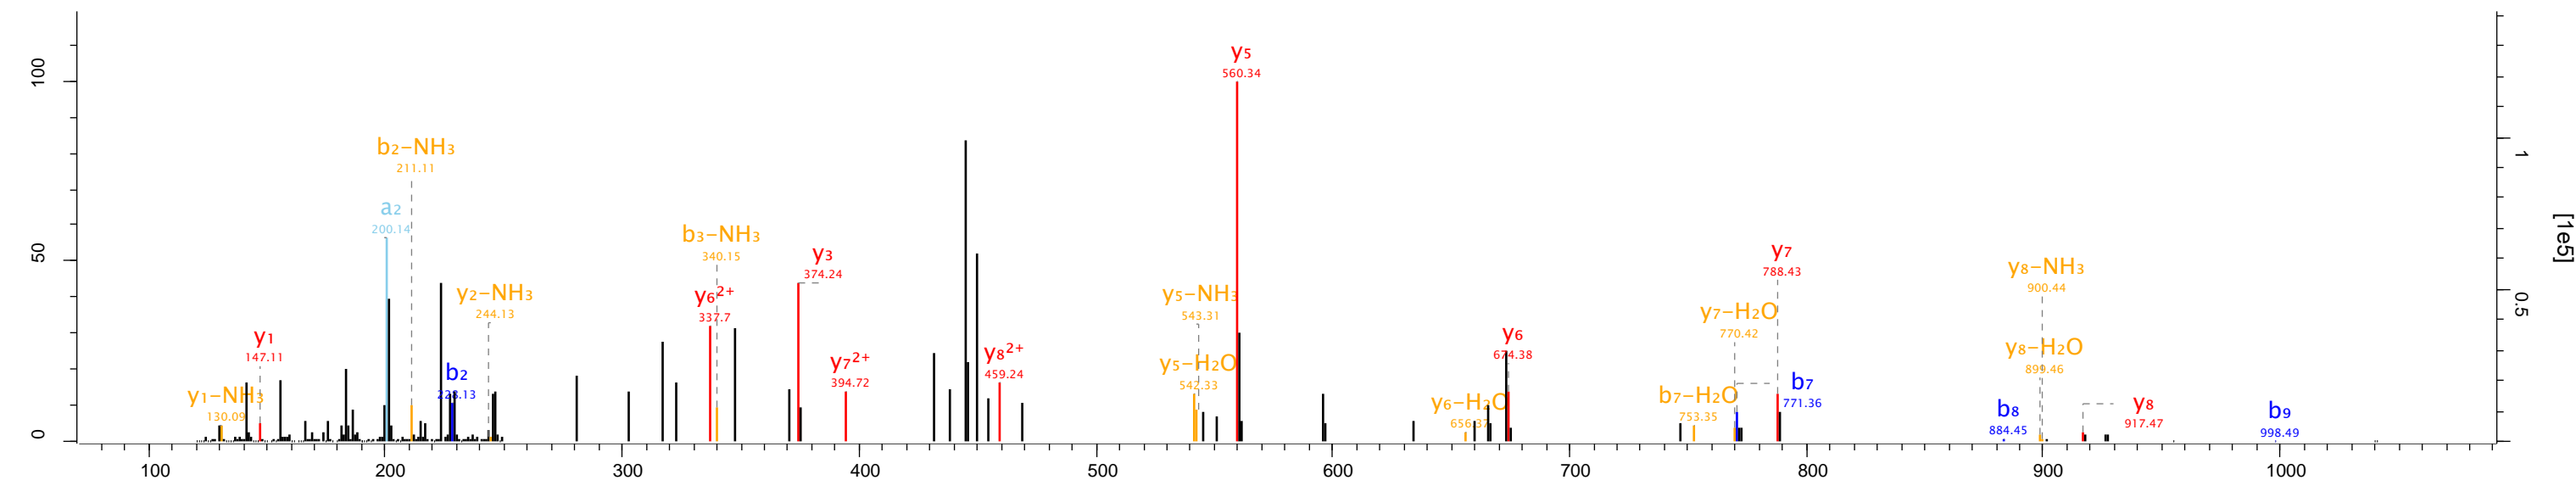

Spectral Annotation for Single-Peptide IDs in 16-cell Embryo using Q-OT-LIT



Raw file: 2015-01-05\_CL03\_XenEmb\_x2  
 Scan: 23835 Method: ITMS; HCD Score: 102.06 m/z: 382.2

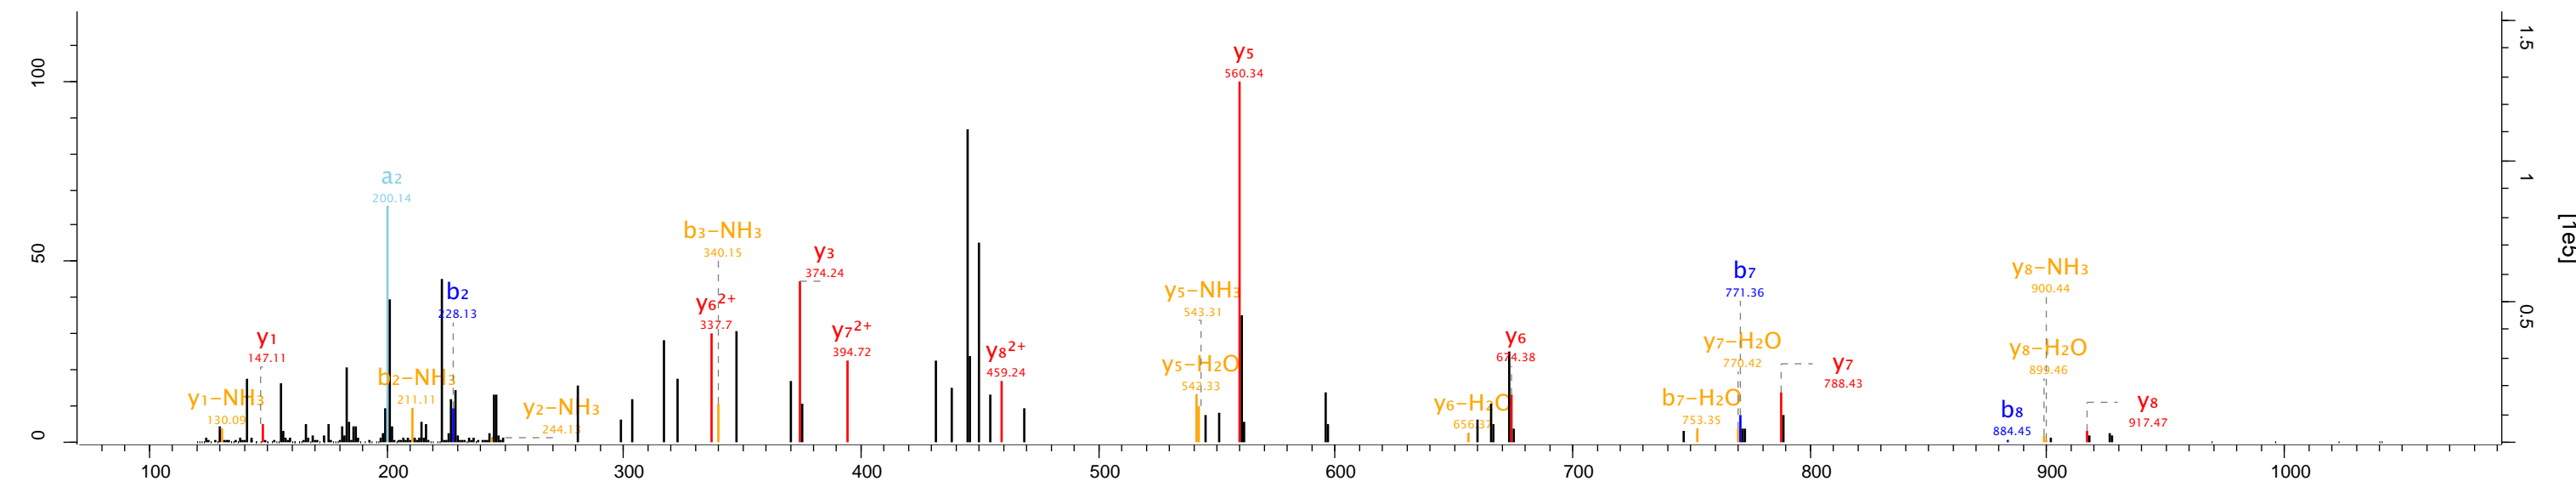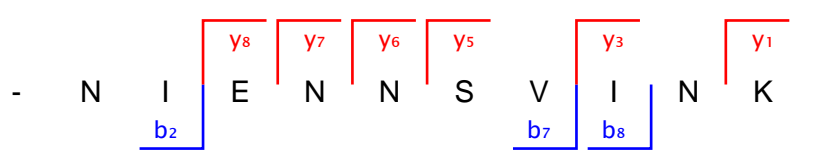

Raw file 2015-01-05\_CL03\_XenEmb\_x2 Scan 23842 Method ITMS; HCD Score 101.66 m/z 382.2

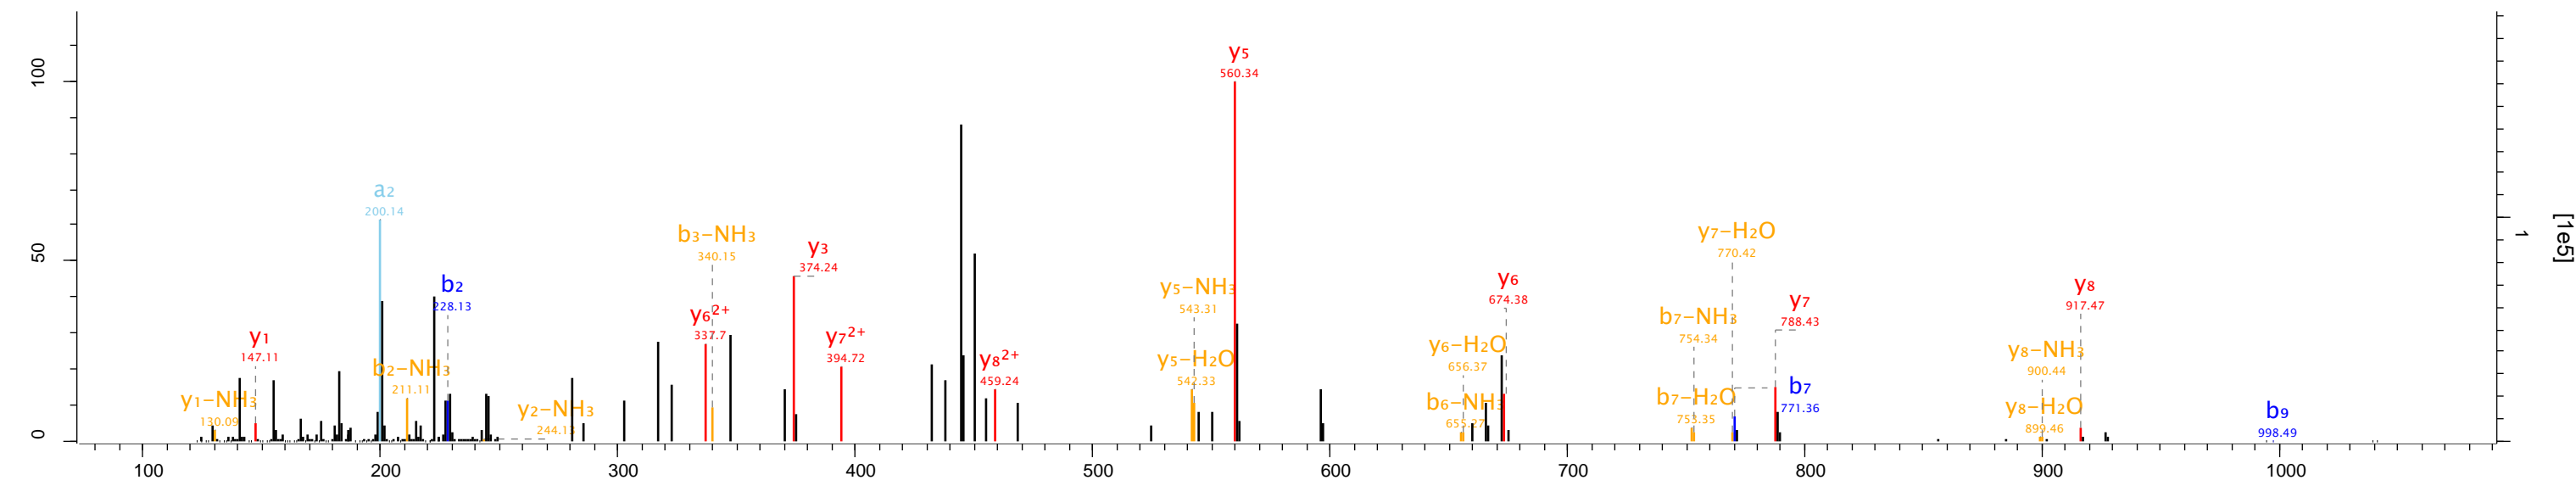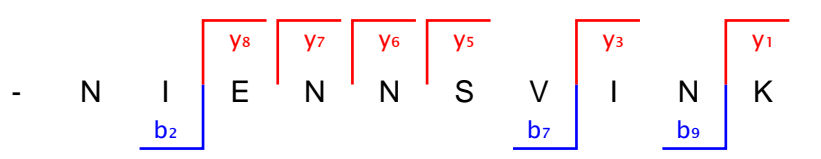

Raw file 2015-01-05\_CL03\_XenEmb\_x2 Scan 23855 Method ITMS; HCD Score 96.67 m/z 382.2

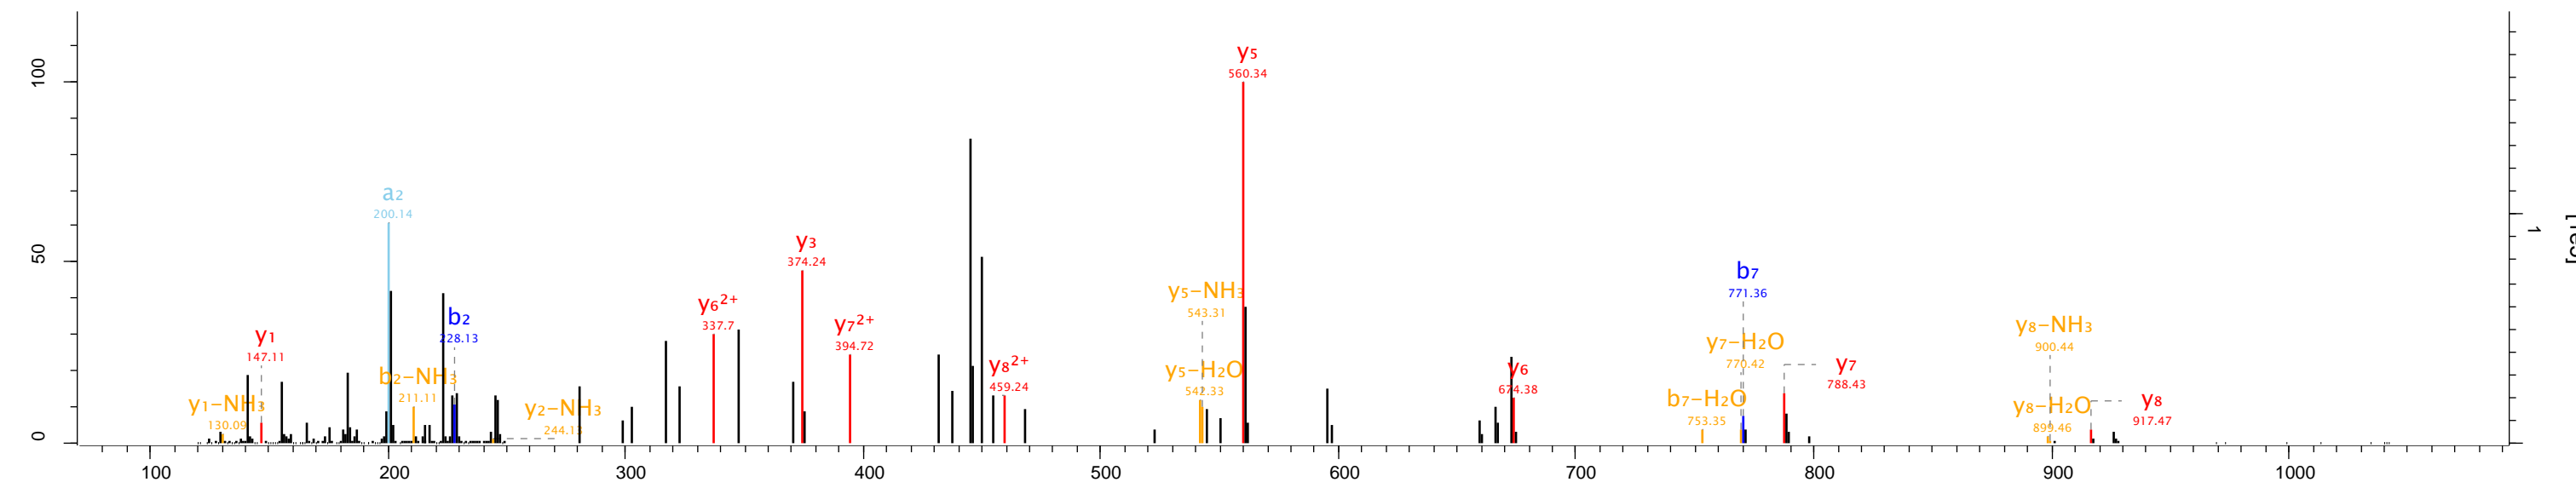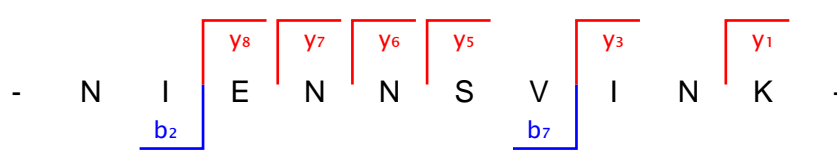

Raw file: 2015-01-05\_CL03\_XenEmb\_x2  
 Scan: 23875 Method: ITMS; HCD Score: 97.47 m/z: 382.2

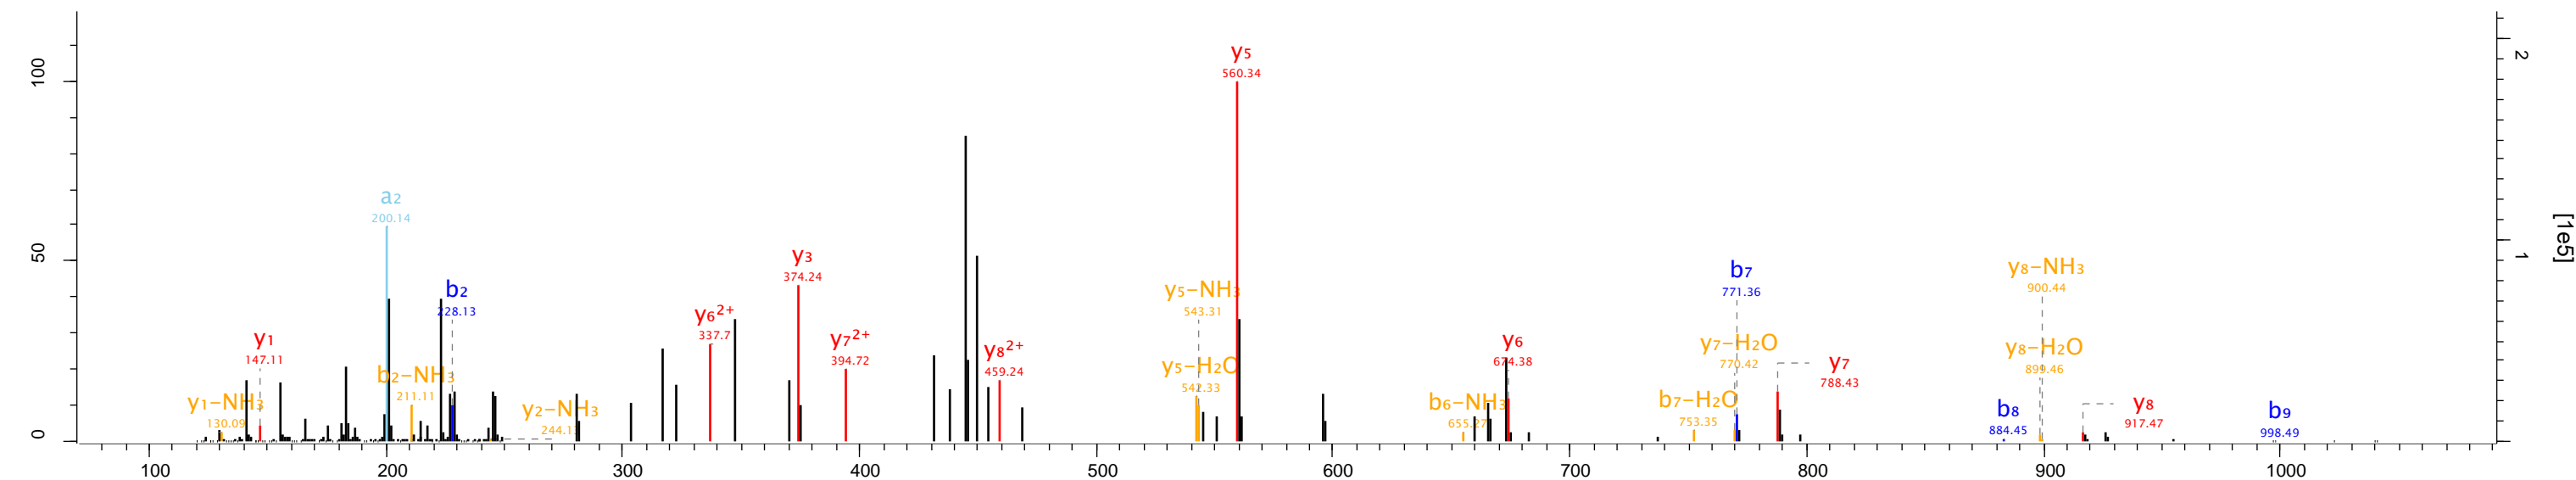

Spectral Annotation for Single-Peptide IDs in 16-cell Embryo using Q-OT-LIT

Raw file: 2015-01-05\_CL03\_XenEmb\_x2  
 Scan: 23880 Method: ITMS; HCD Score: 82.83 m/z: 382.2

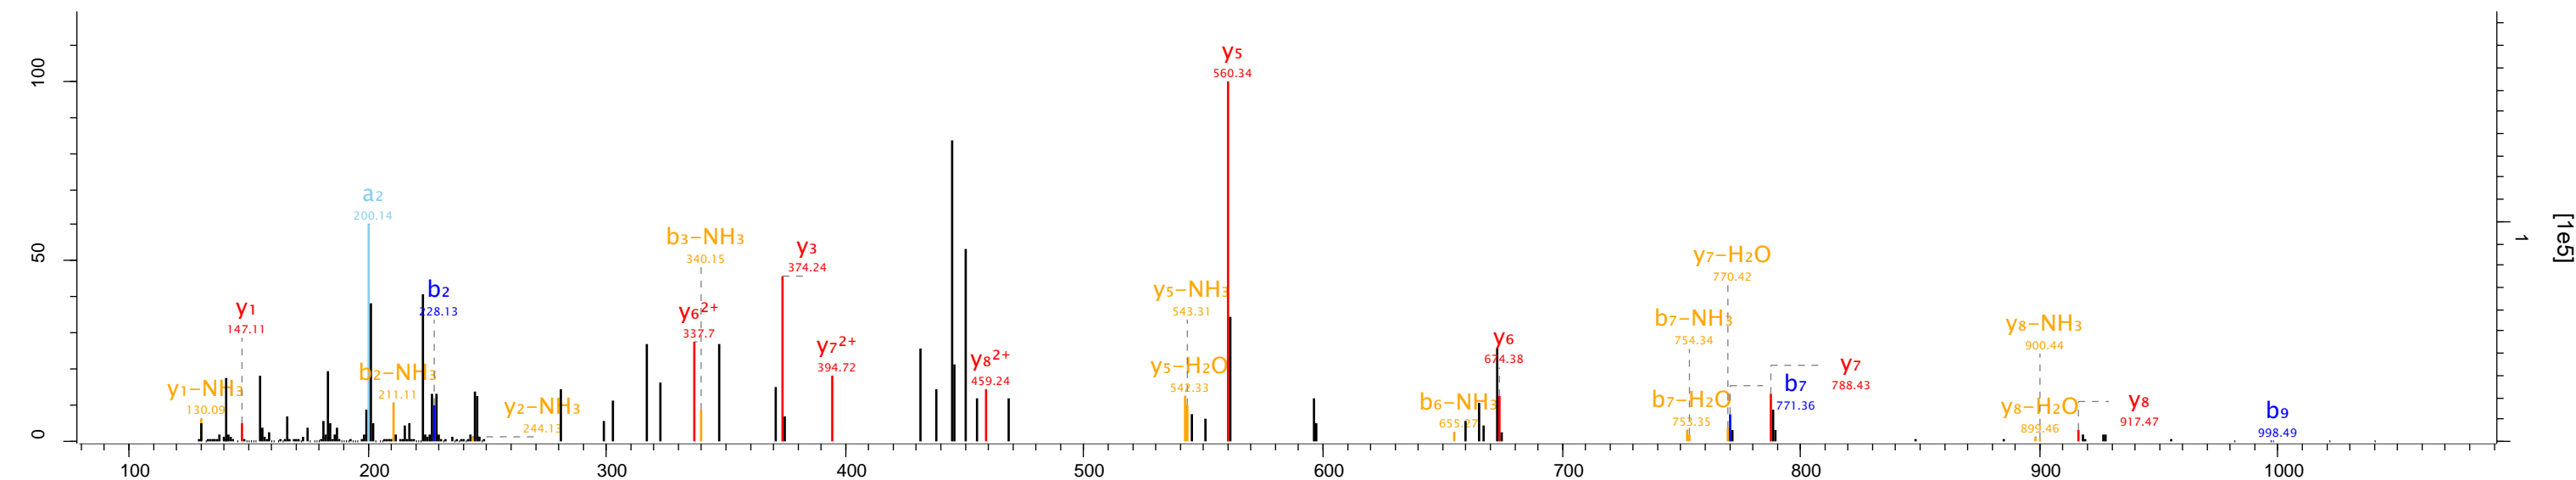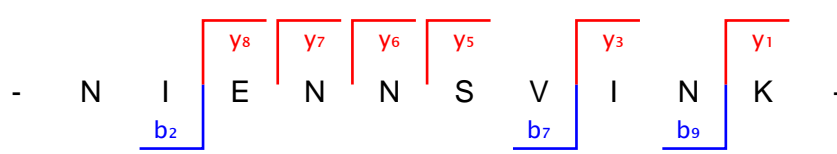

Raw file: 2015-01-05\_CL03\_XenEmb\_x2  
 Scan: 23900 Method: ITMS; HCD Score: 108.43 m/z: 382.2

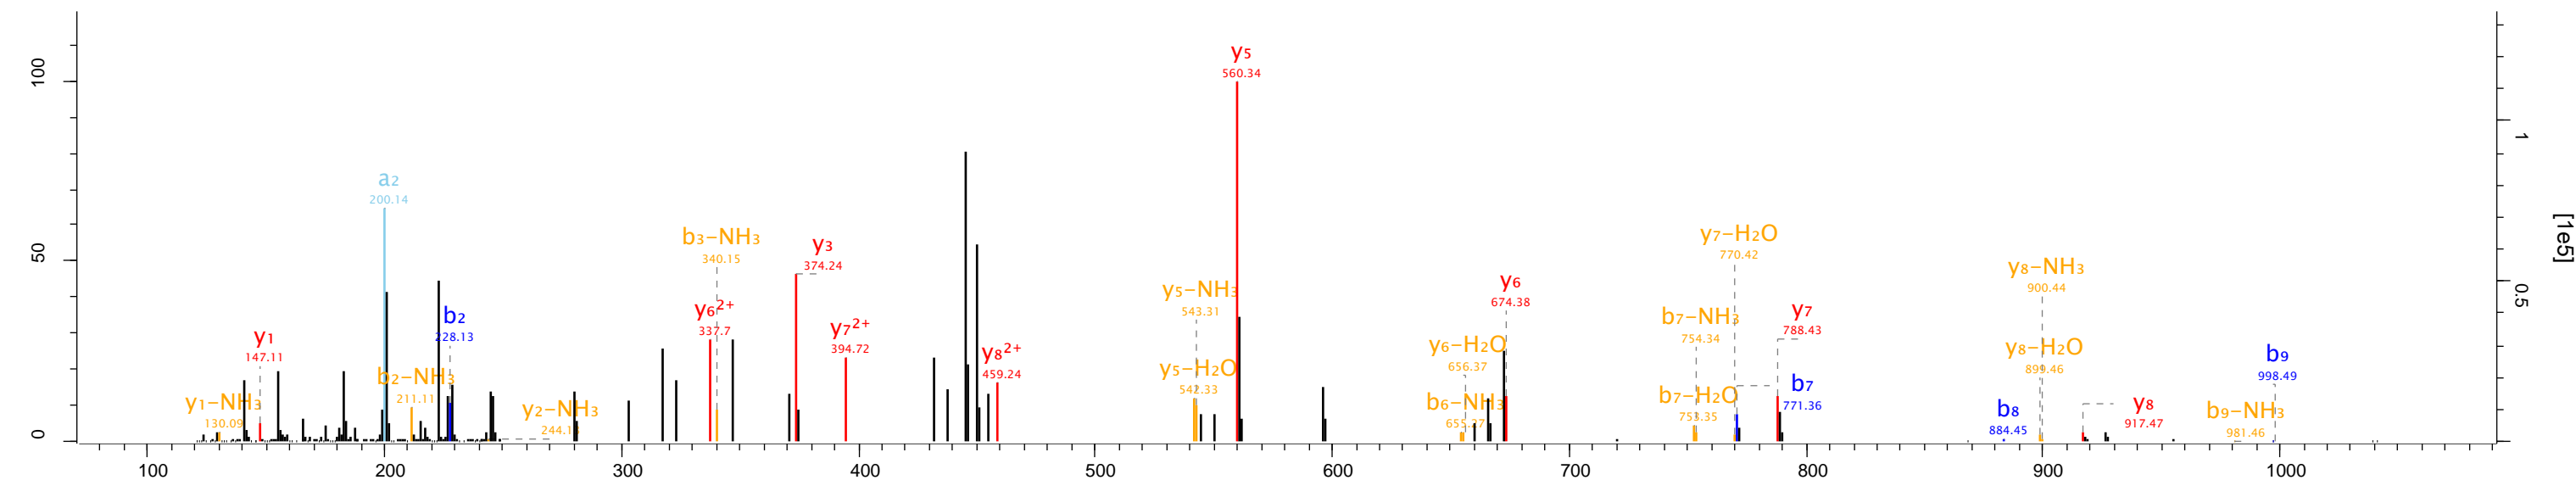

Raw file 2015-01-05\_CL03\_XenEmb\_x2 Scan 24043 Method ITMS; HCD Score 98.04 m/z 630.81

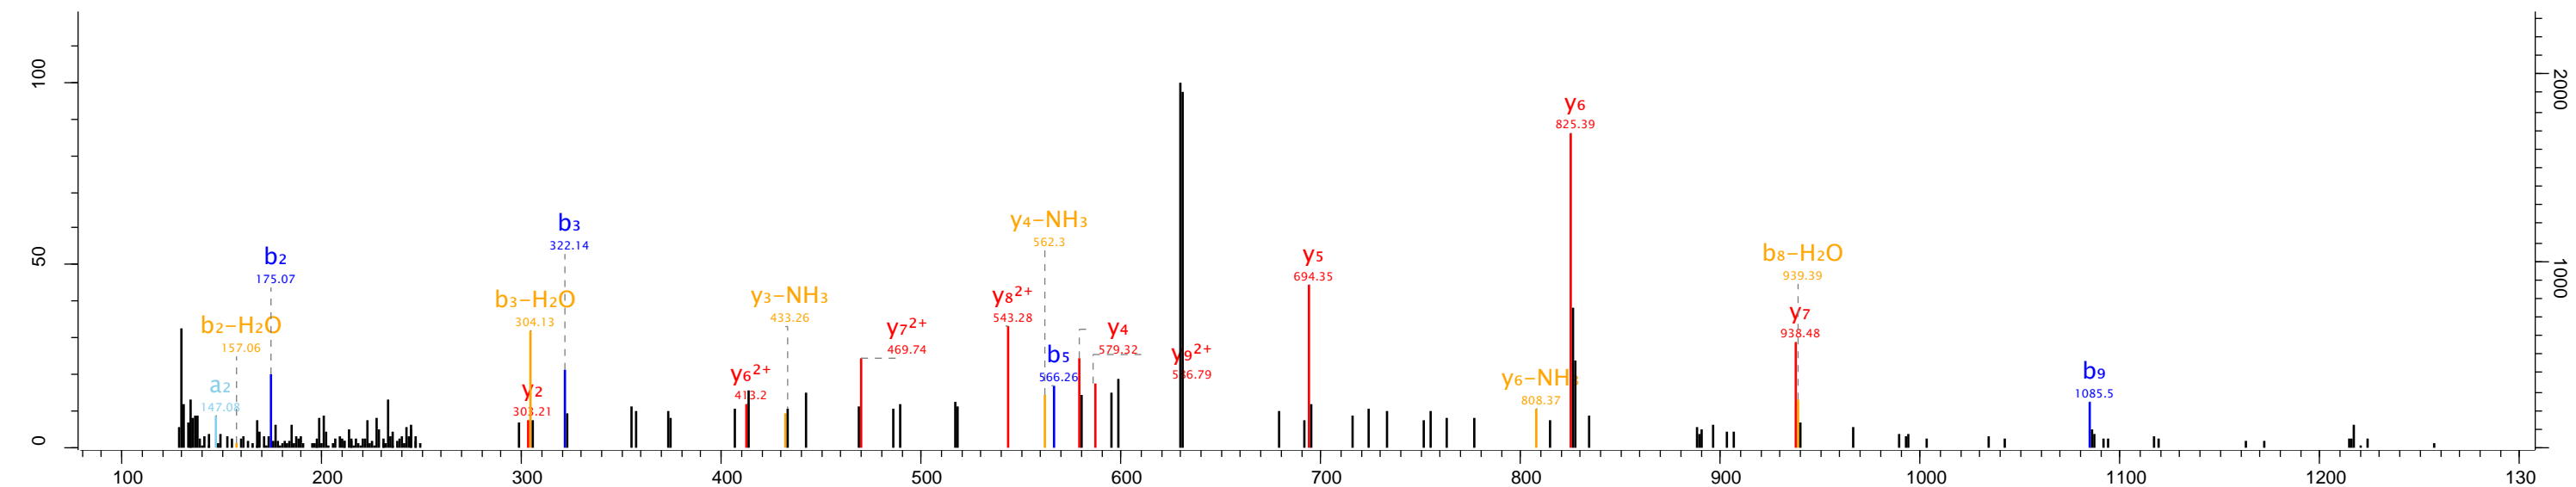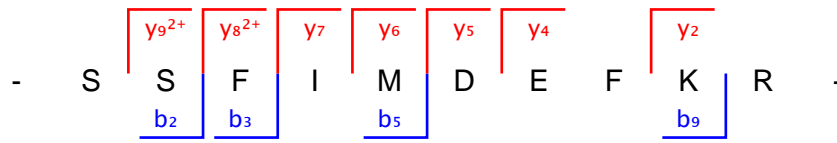

Raw file: 2015-01-05\_CL03\_XenEmb\_x2  
 Scan: 24209 Method: ITMS; HCD Score: 68.85 m/z: 568.3

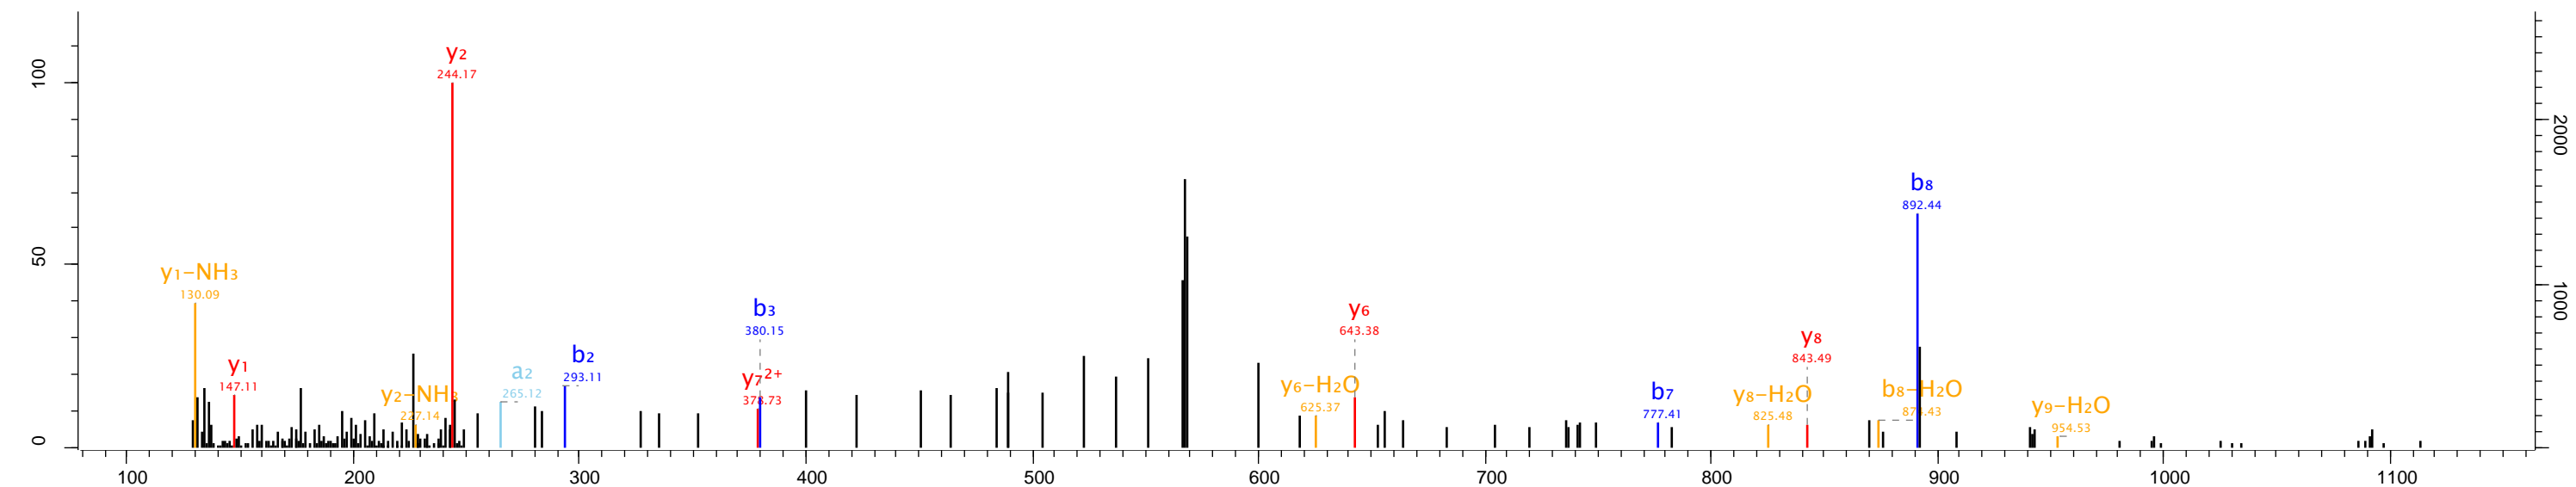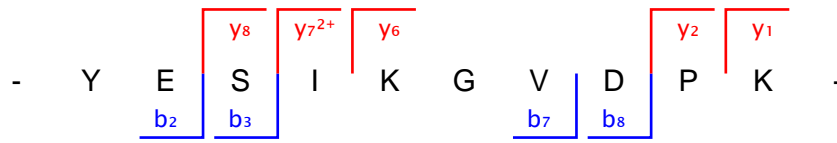



Raw file 2015-01-05\_CL03\_XenEmb\_x2 Scan 24214 Method ITMS; HCD Score 64.41 m/z 487.27

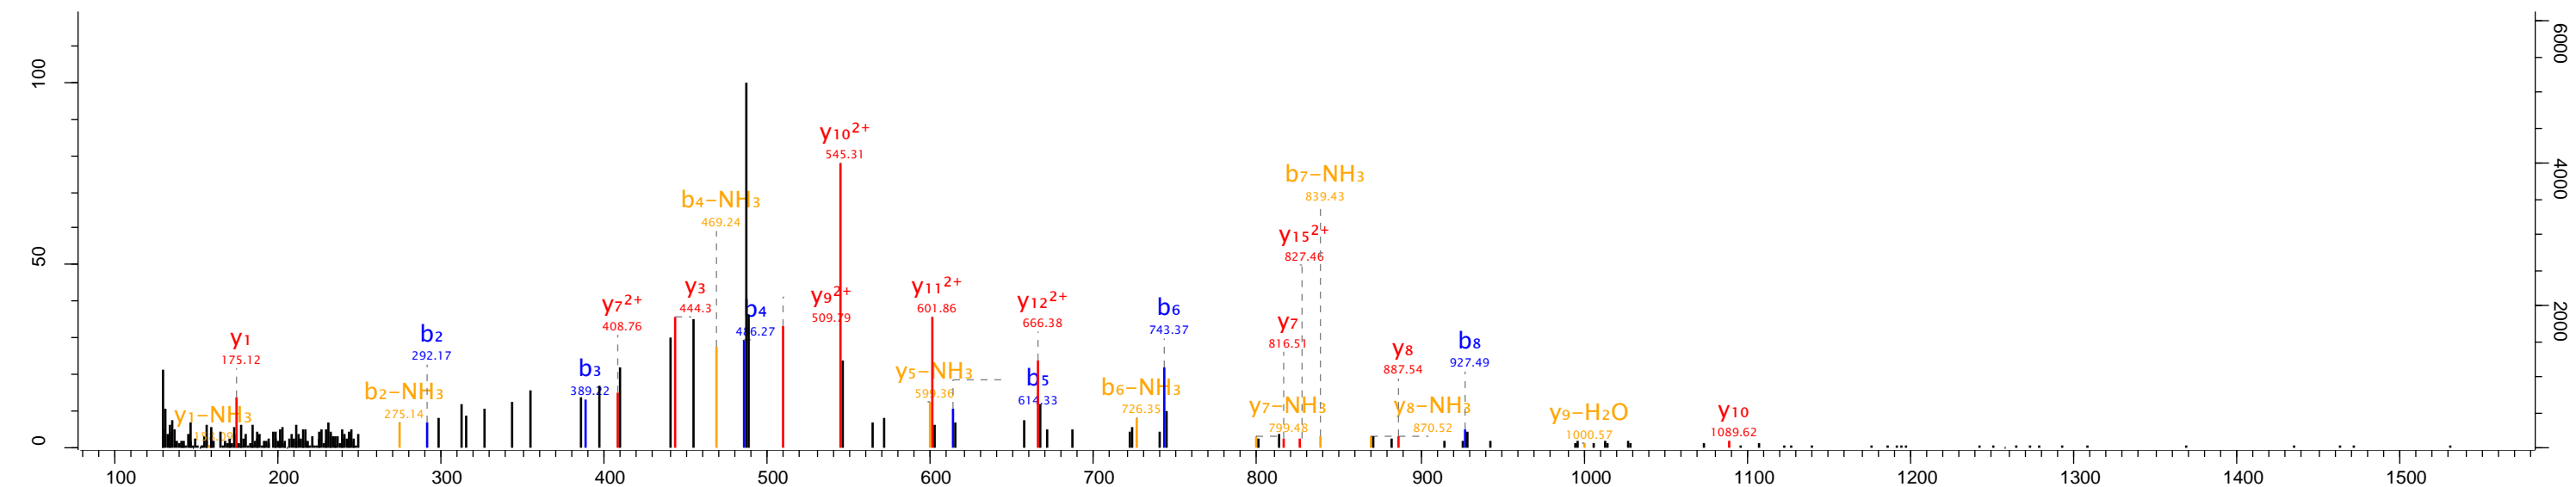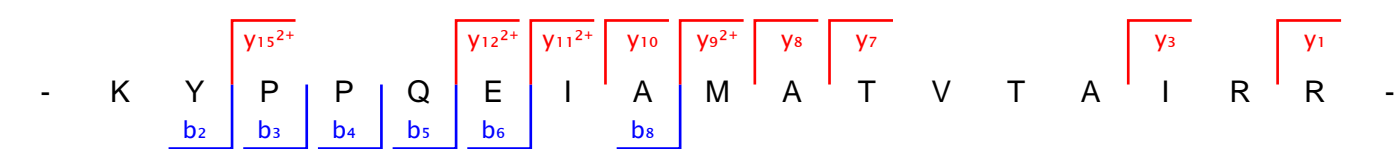

Raw file: 2015-01-05\_CL03\_XenEmb\_x2  
 Scan: 24270 Method: ITMS; HCD Score: 38.14 m/z: 481.26

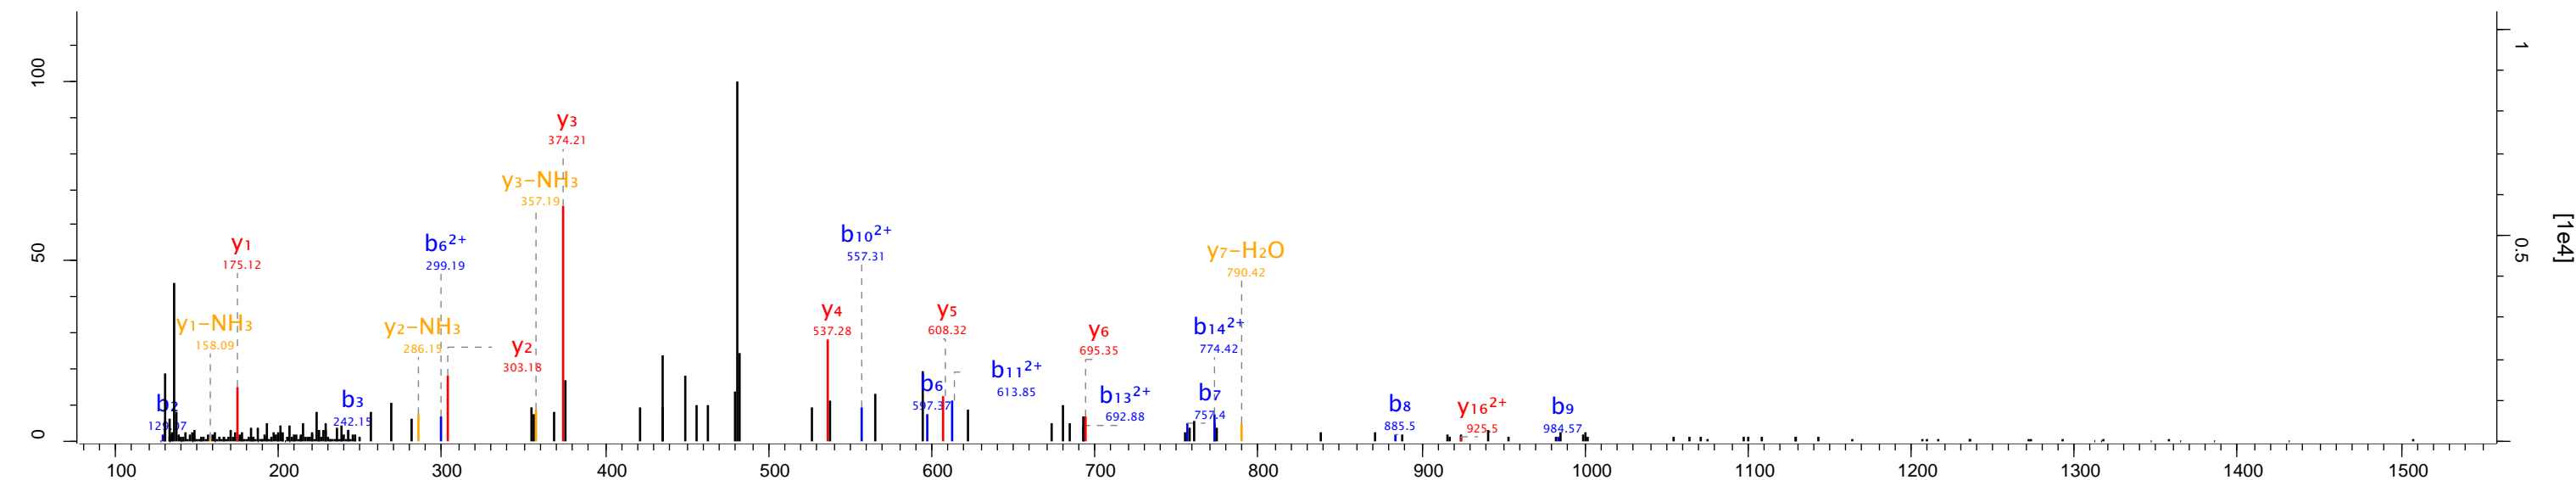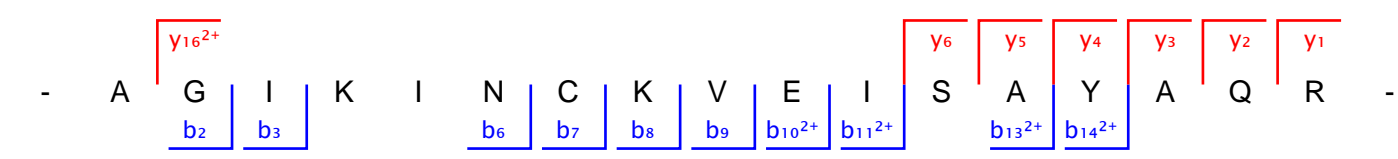

Spectral Annotation for Single-Peptide IDs in 16-cell Embryo using Q-OT-LIT

Raw file 2015-01-05\_CL03\_XenEmb\_x2 Scan 24352 Method ITMS; HCD Score 77.73 m/z 481.26

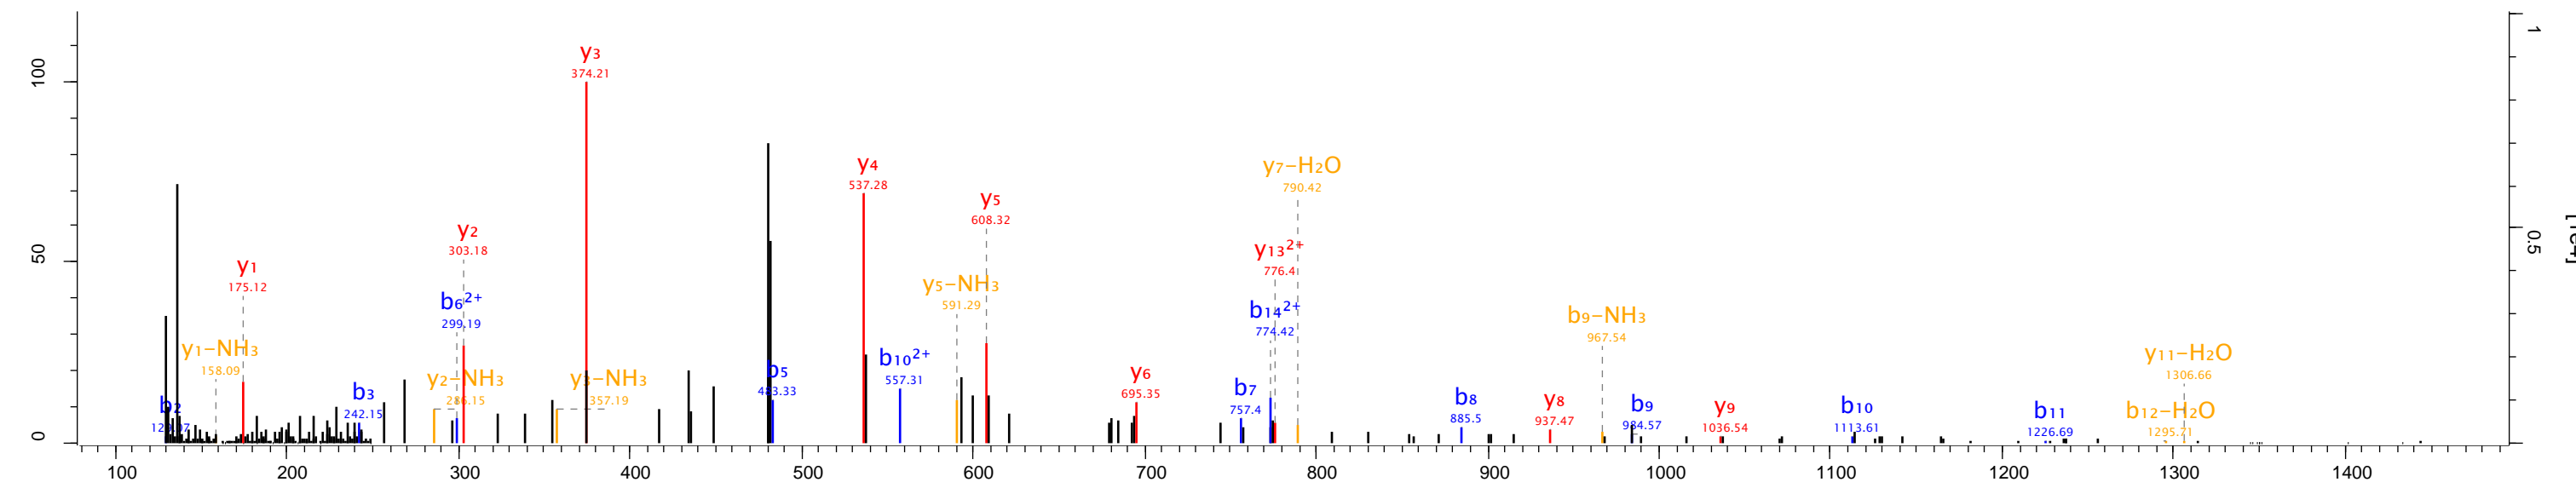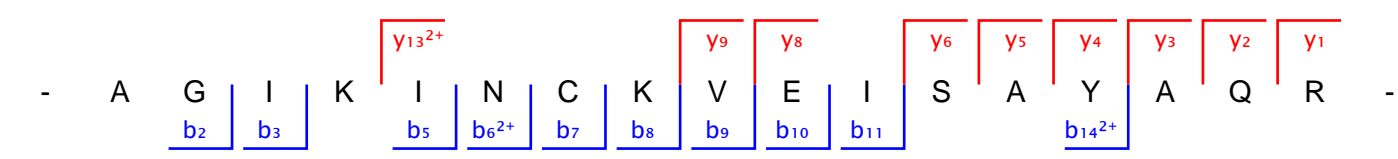

Raw file: 2015-01-05\_CL03\_XenEmb\_x2  
 Scan: 24367 Method: ITMS; HCD Score: 43.21 m/z: 641.68

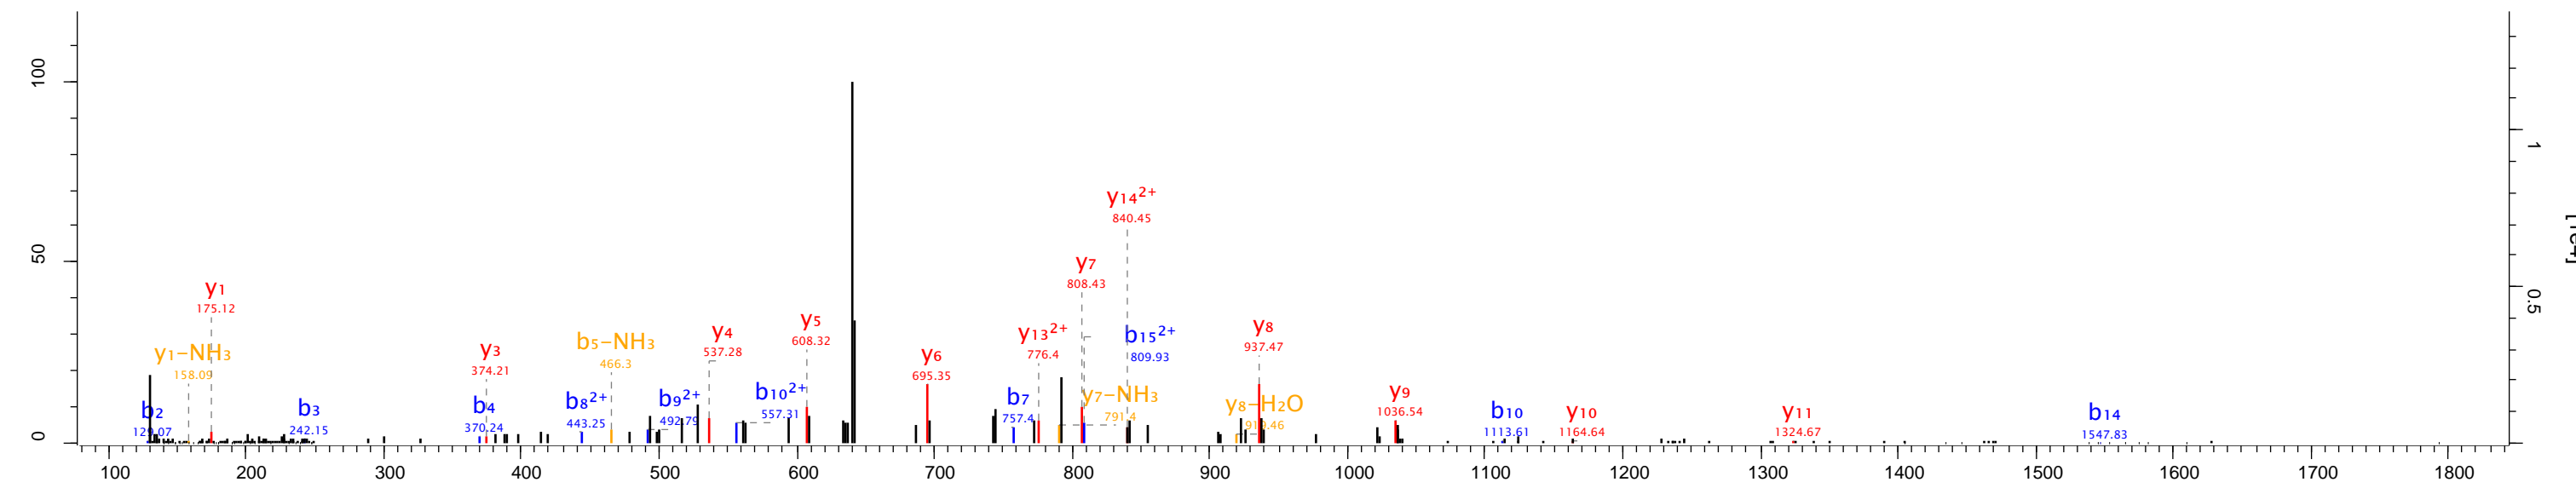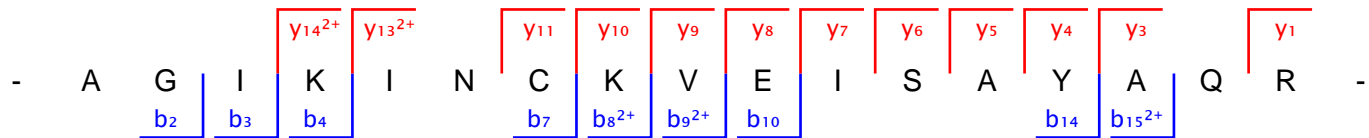

Spectral Annotation for Single-Peptide IDs in 16-cell Embryo using Q-OT-LIT

Raw file 2015-01-05\_CL03\_XenEmb\_x2 Scan 24420 Method ITMS; HCD Score 51.29 m/z 427.21

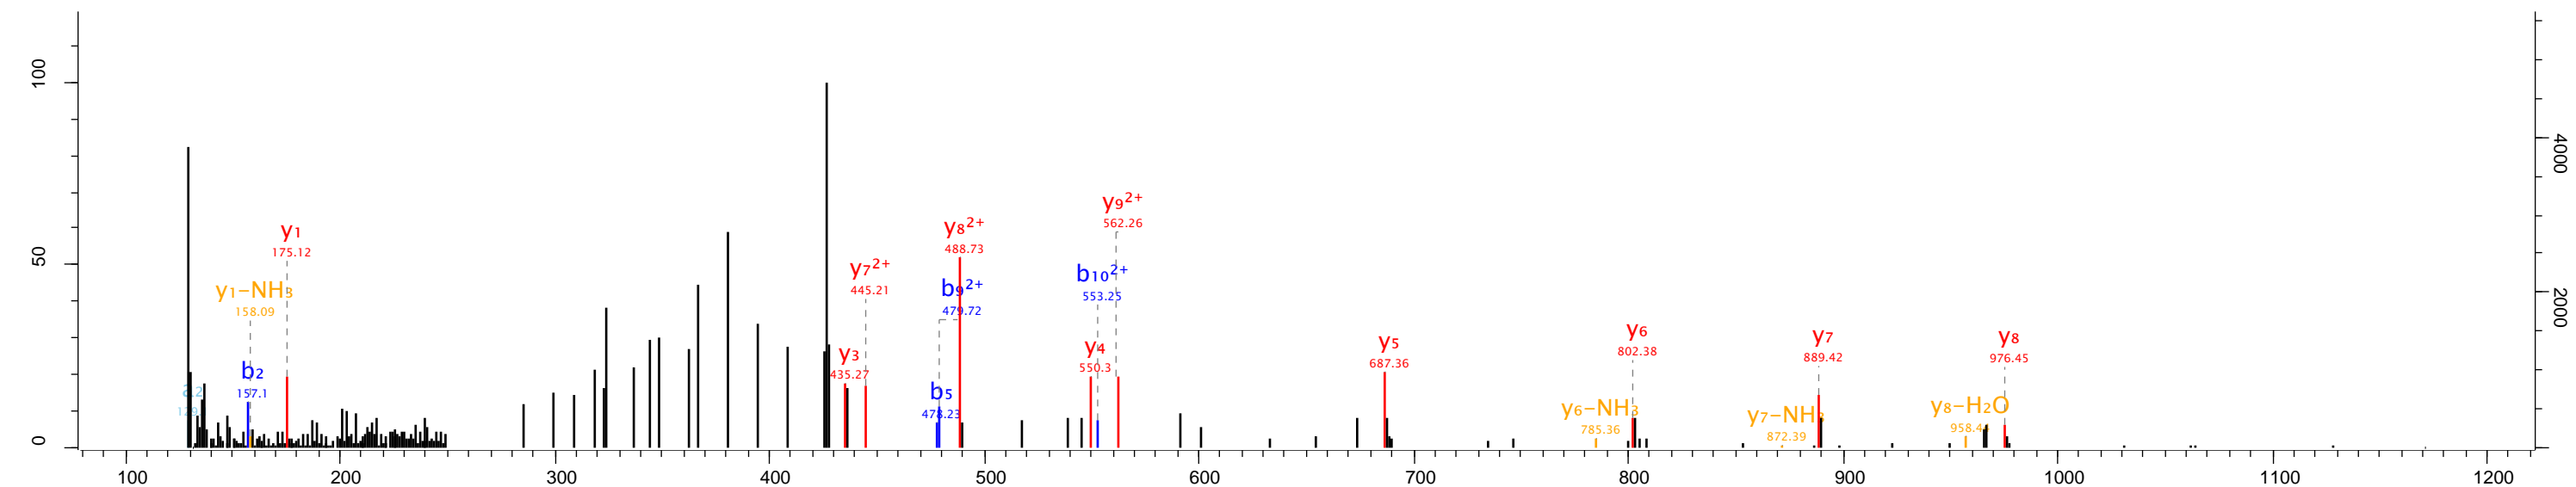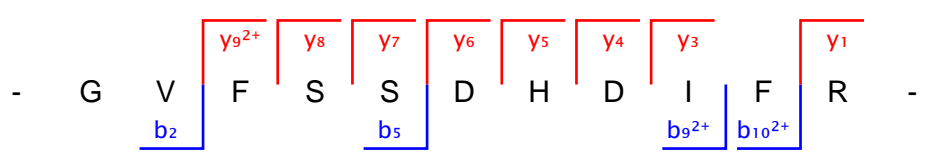

Raw file: 2015-01-05\_CL03\_XenEmb\_x2  
 Scan: 24505 Method: ITMS; HCD Score: 66.92 m/z: 427.55

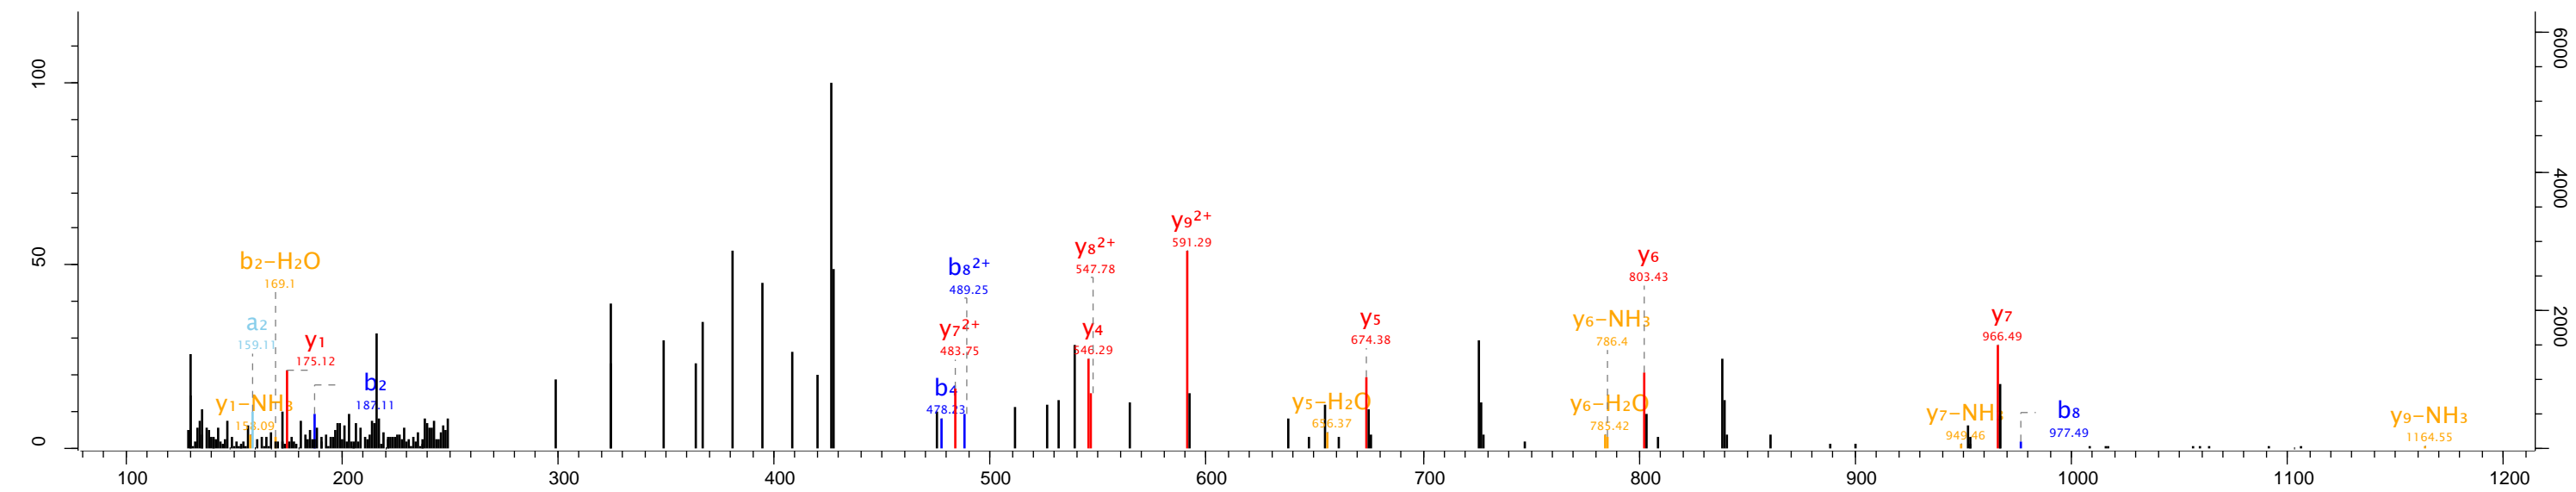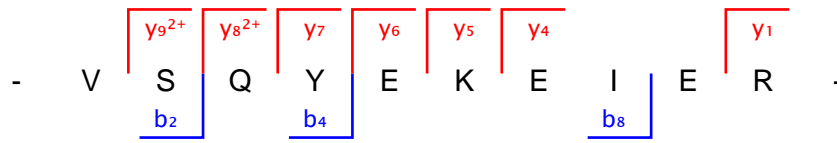

Spectral Annotation for Single-Peptide IDs in 16-cell Embryo using Q-OT-LIT

Raw file: 2015-01-05\_CL03\_XenEmb\_x2  
 Scan: 24672 Method: ITMS; HCD Score: 55.26 m/z: 442.26

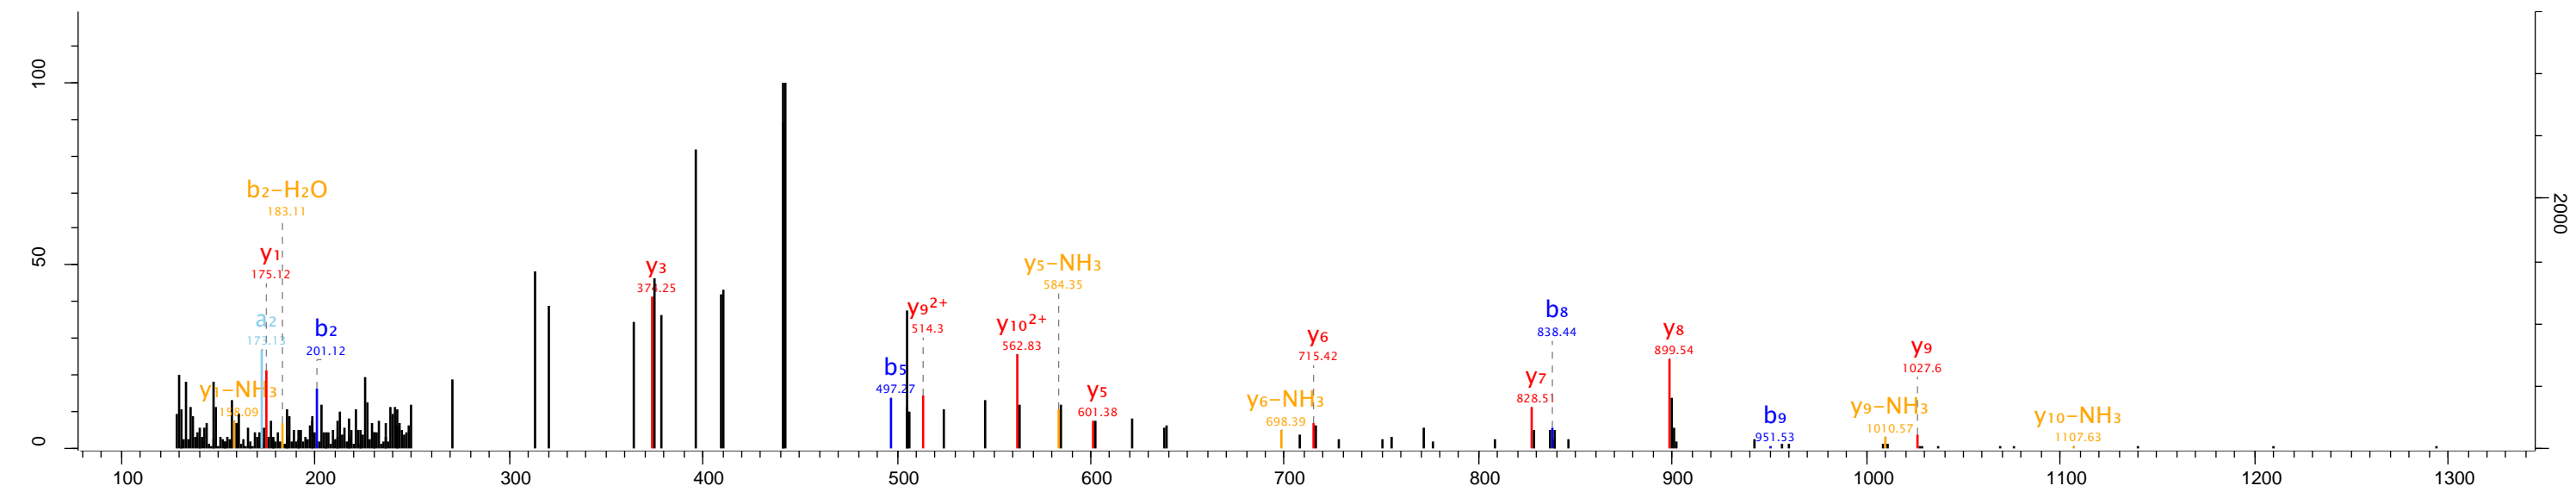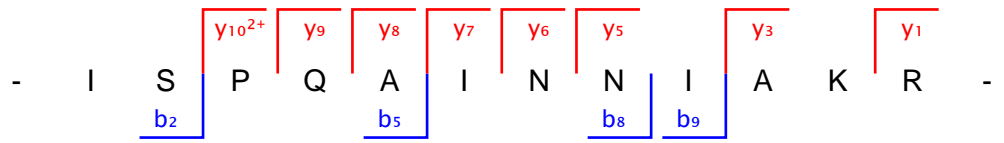

Spectral Annotation for Single-Peptide IDs in 16-cell Embryo using Q-OT-LIT

Raw file: 2015-01-05\_CL03\_XenEmb\_x2  
 Scan: 24844 Method: ITMS; HCD Score: 56.04 m/z: 412.57

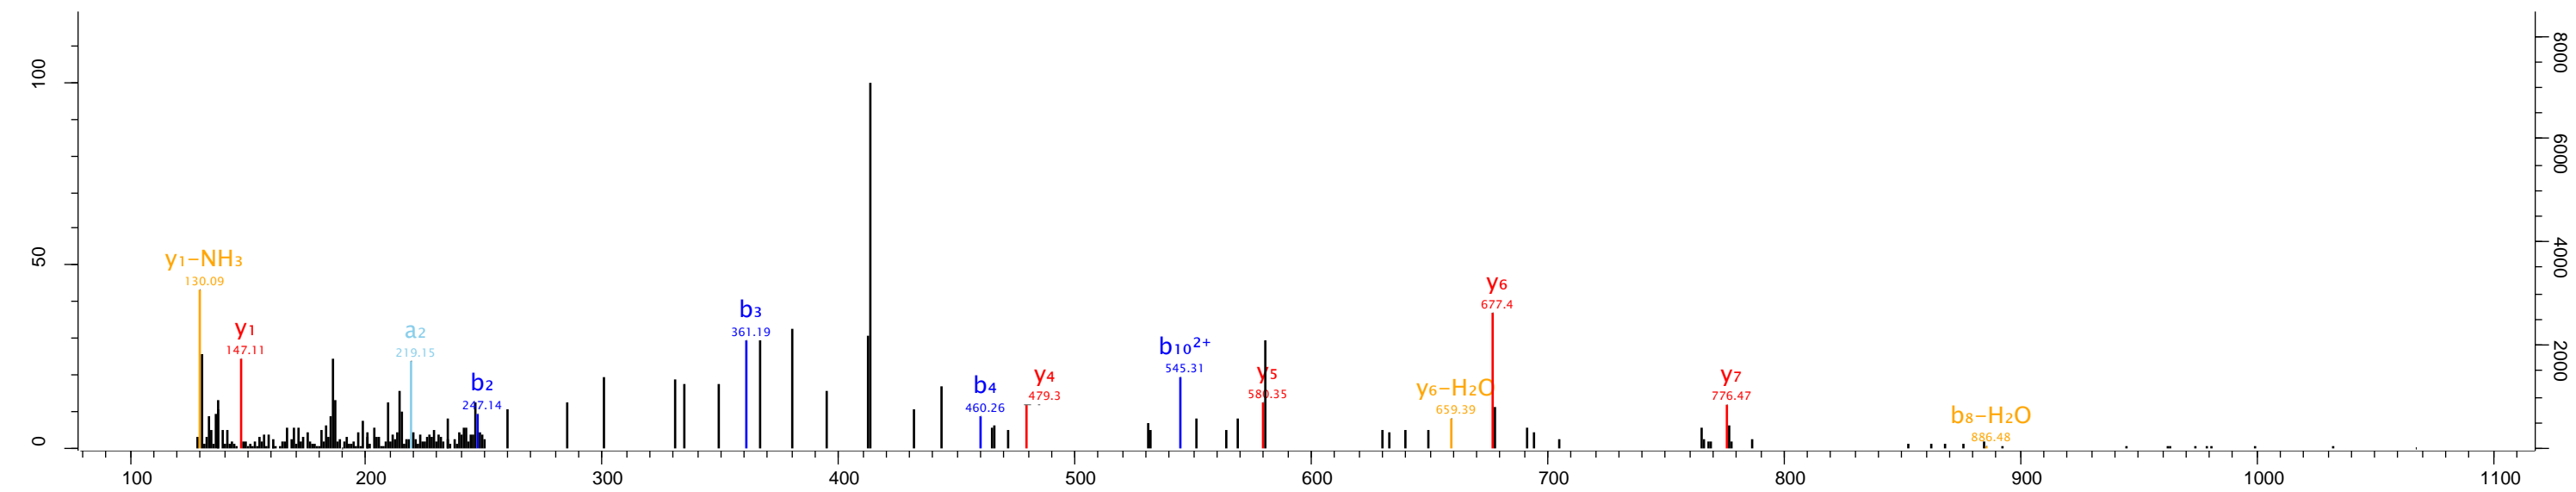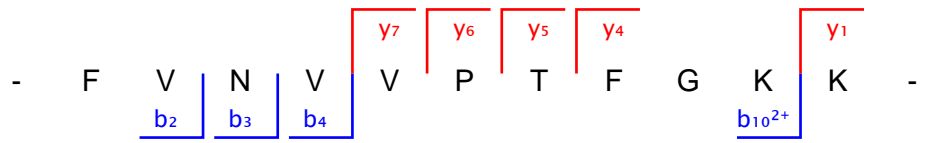

Spectral Annotation for Single-Peptide IDs in 16-cell Embryo using Q-OT-LIT



Raw file 2015-01-05\_CL03\_XenEmb\_x2 Scan 24889 Method ITMS; HCD Score 67.25 m/z 494.03

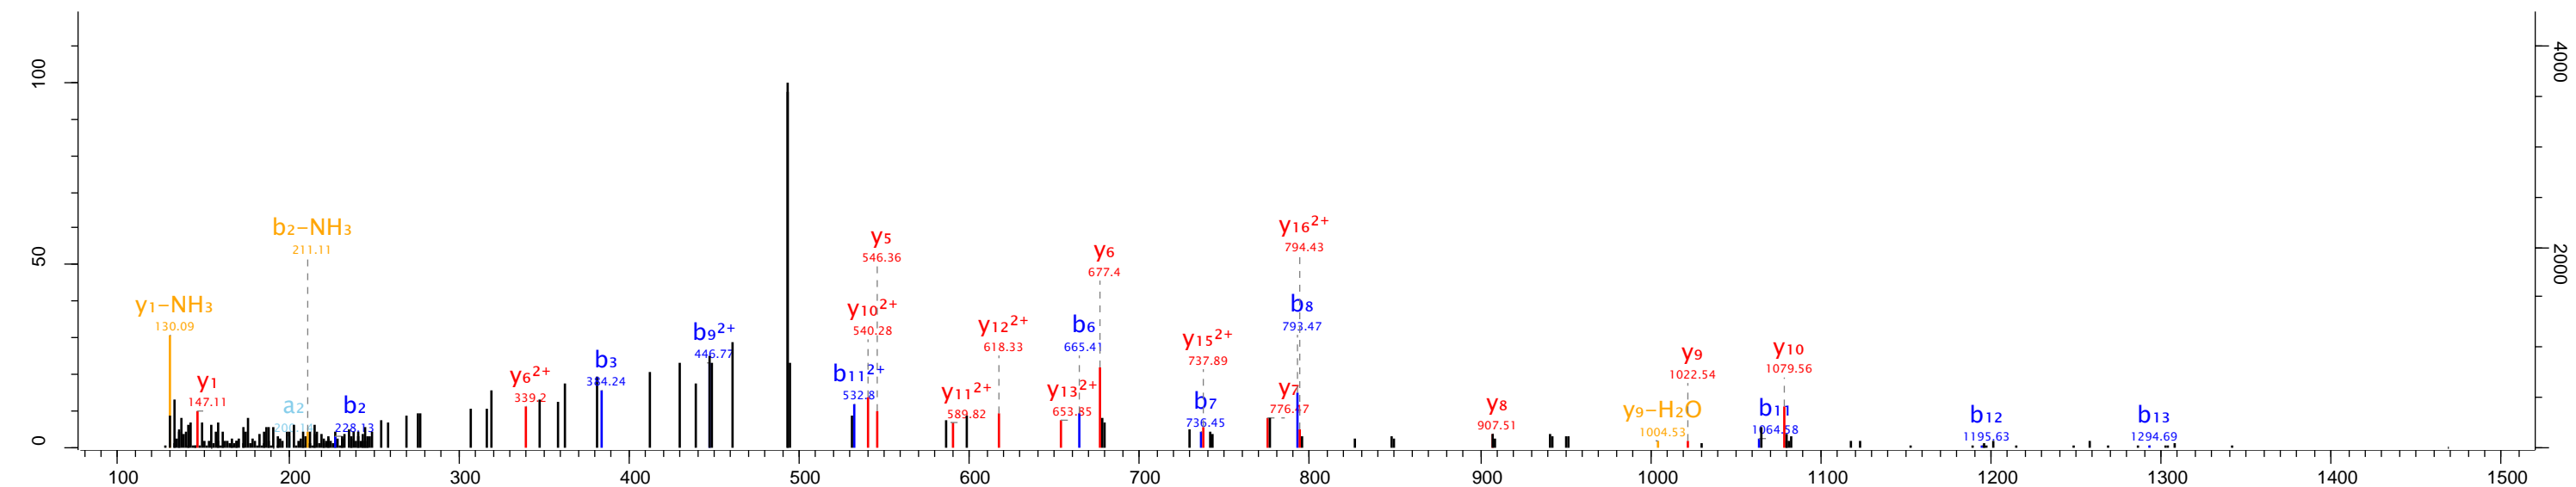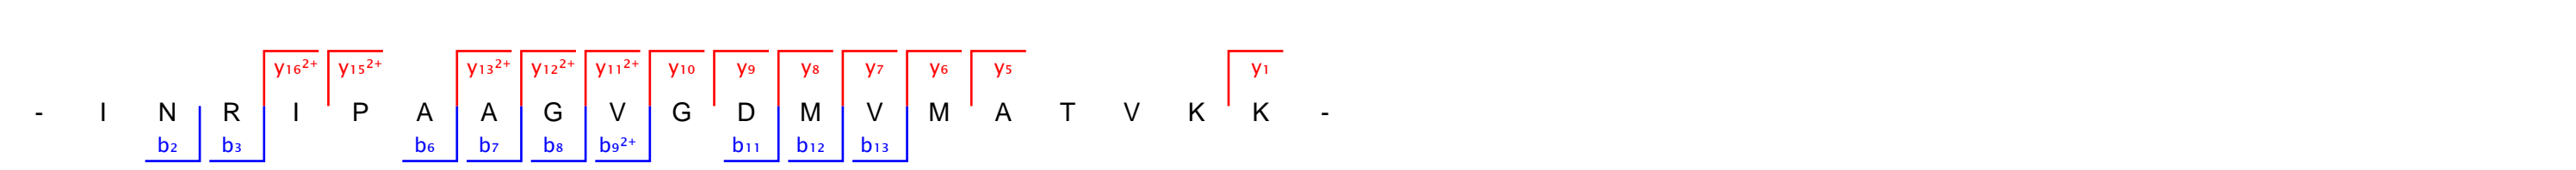

Raw file: 2015-01-05\_CL03\_XenEmb\_x2  
 Scan: 24908 Method: ITMS; HCD Score: 72.97 m/z: 493.53

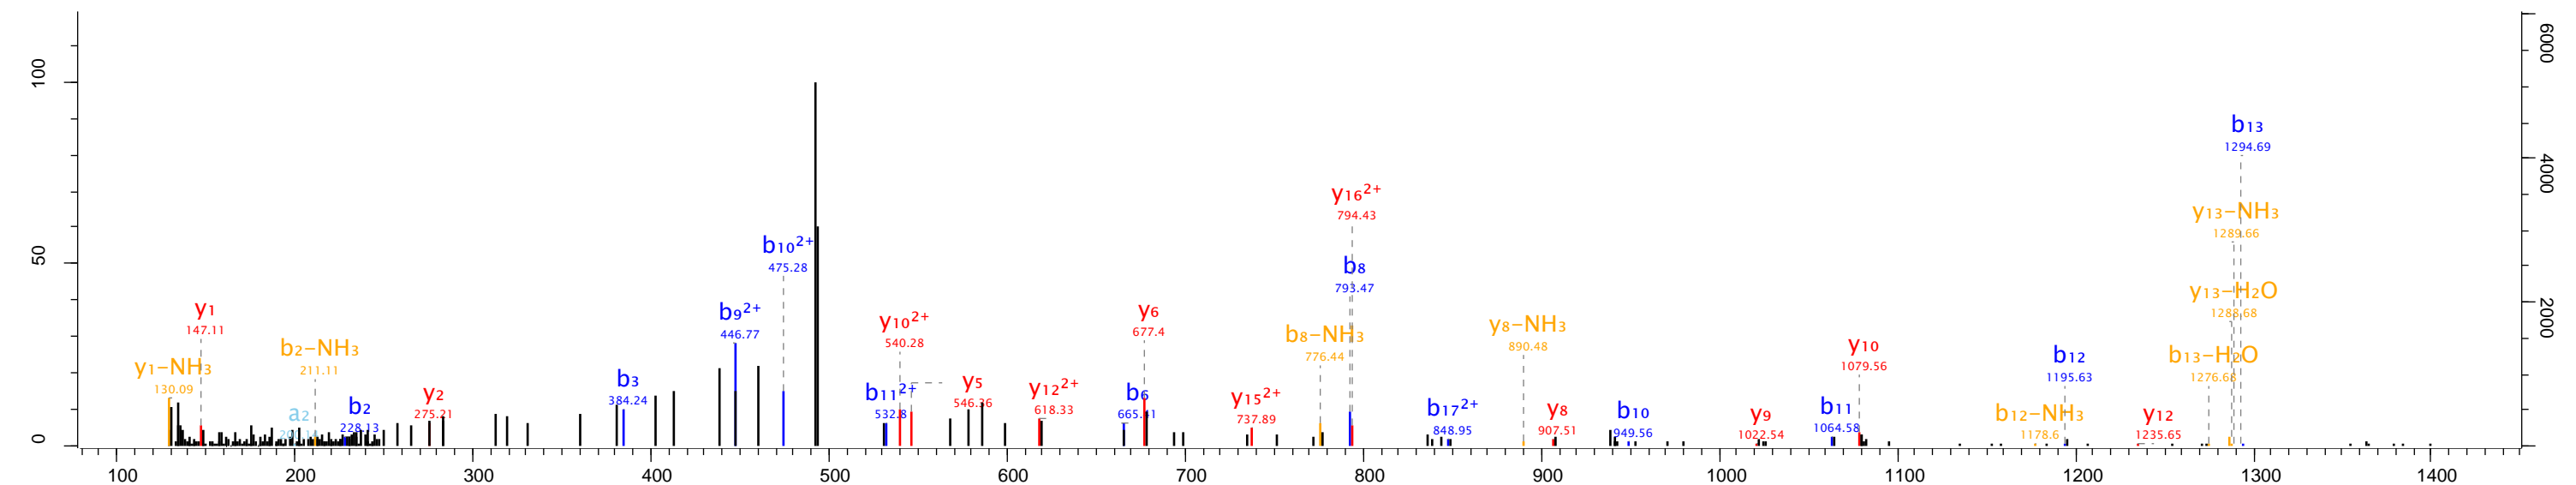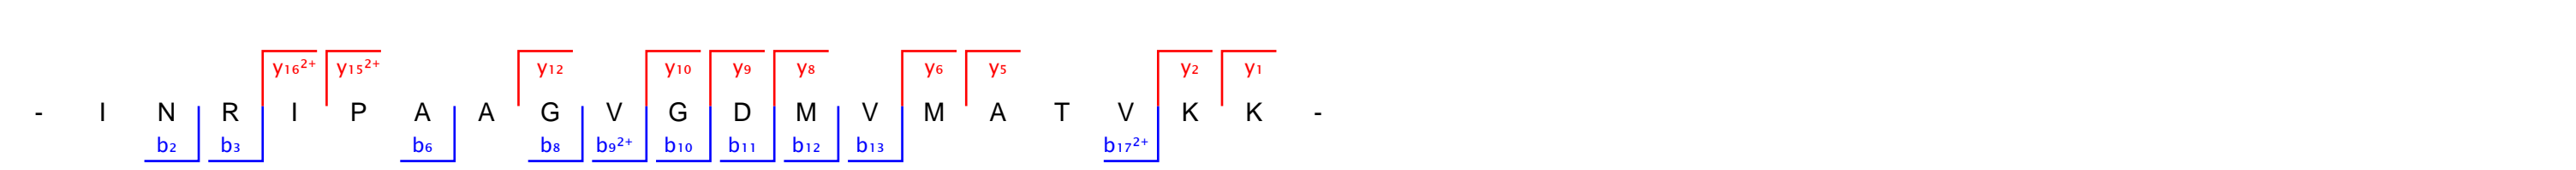

Raw file: 2015-01-05\_CL03\_XenEmb\_x2  
 Scan: 24926 Method: ITMS; HCD Score: 44.74 m/z: 493.53

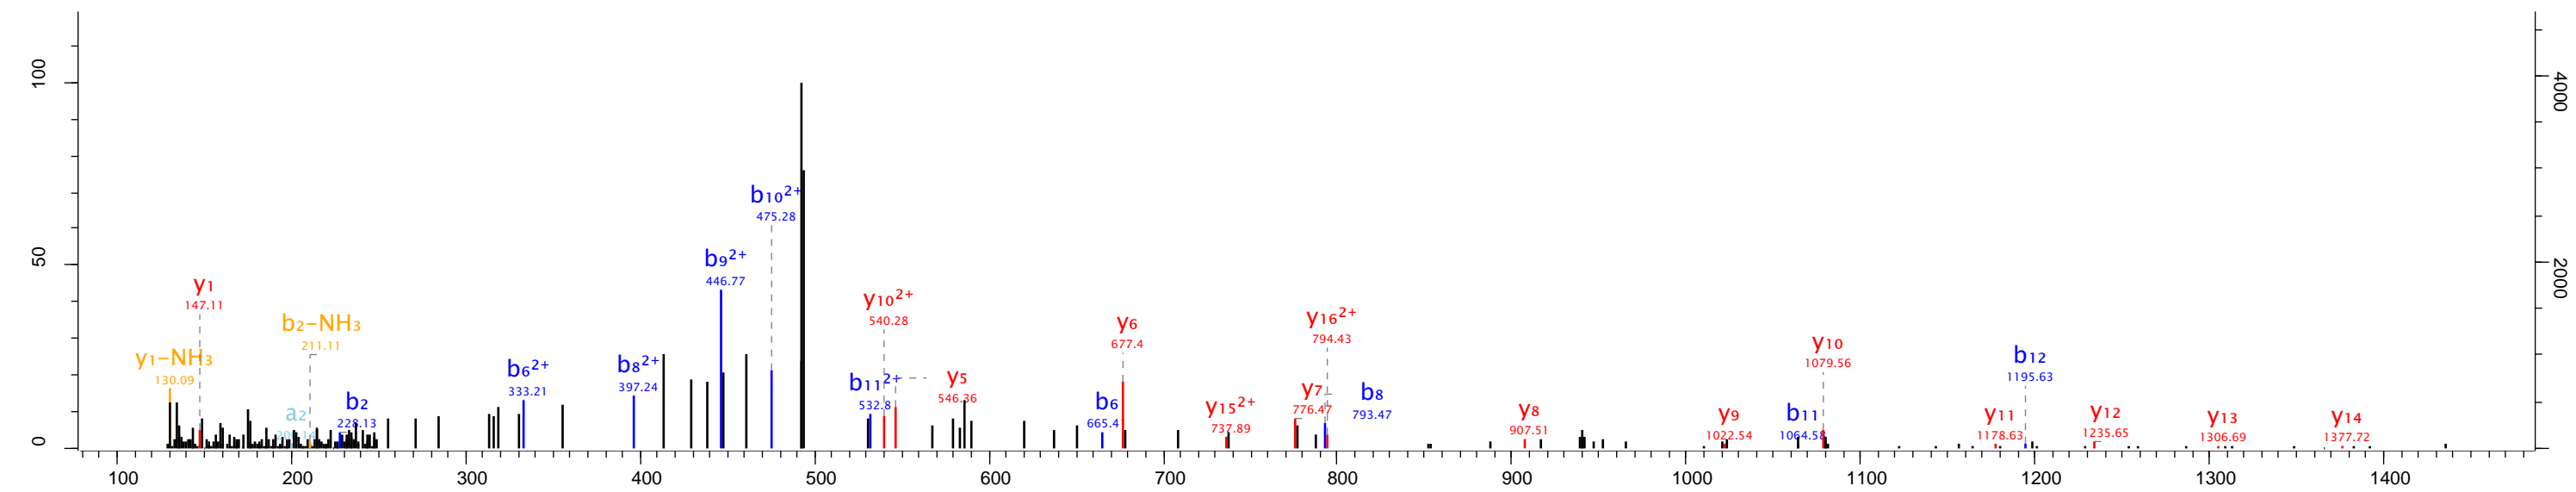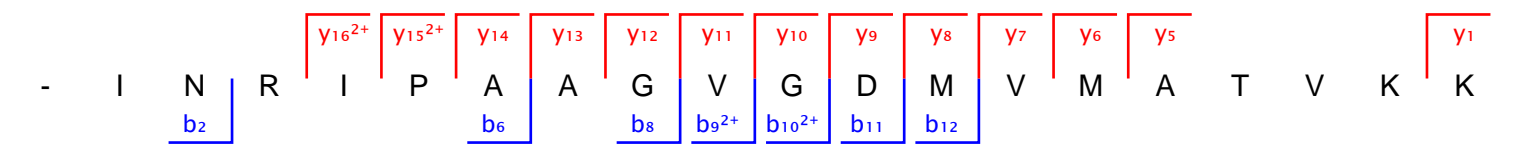

Raw file: 2015-01-05\_CL03\_XenEmb\_x2  
 Scan: 24938 Method: ITMS; HCD Score: 49.93 m/z: 428.57

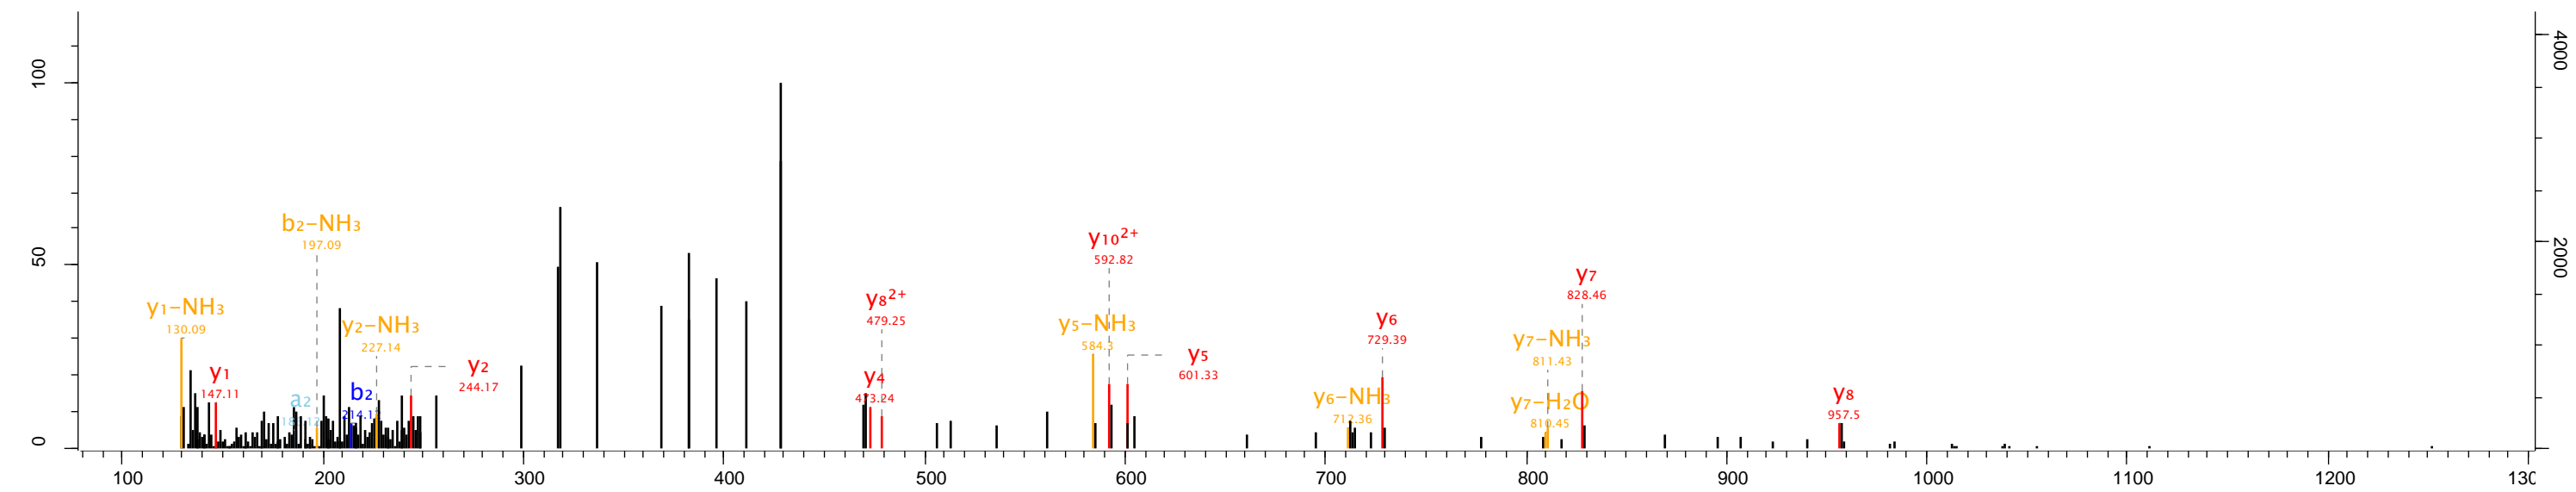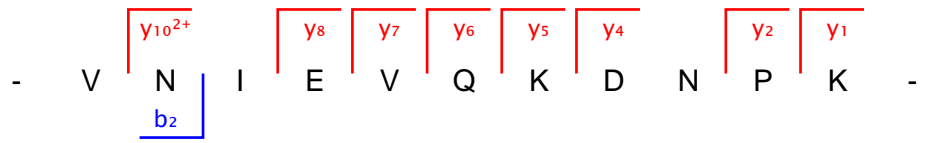

Raw file 2015-01-05\_CL03\_XenEmb\_x2 Scan 24955 Method ITMS; HCD Score 78.34 m/z 428.57

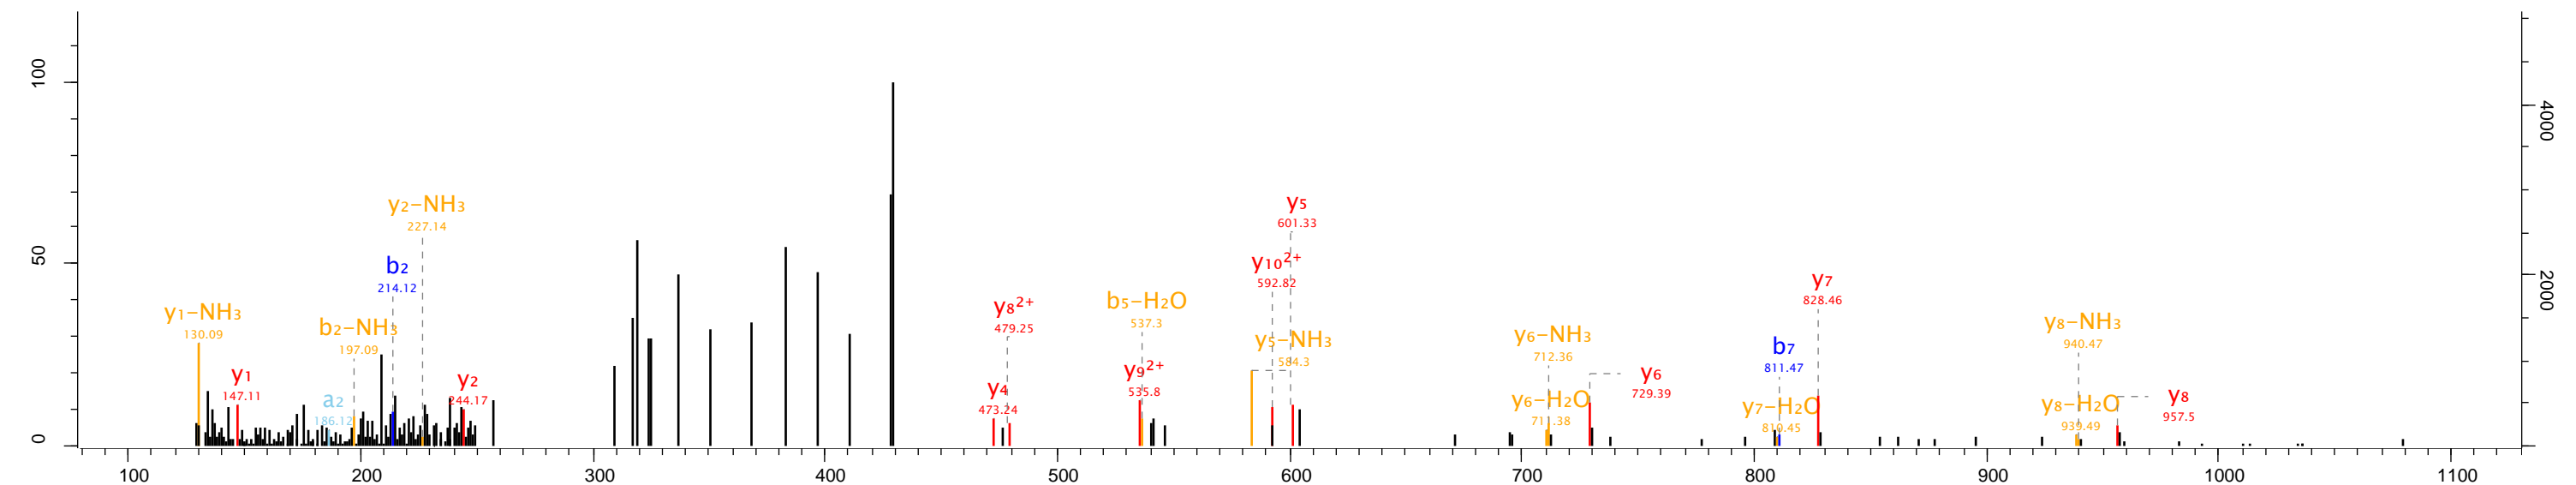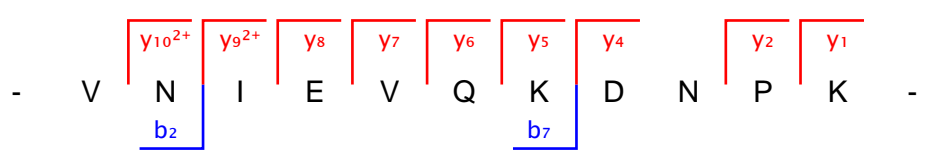

Spectral Annotation for Single-Peptide IDs in 16-cell Embryo using Q-OT-LIT

Raw file 2015-01-05\_CL03\_XenEmb\_x2 Scan 25141 Method ITMS; HCD Score 62.63 m/z 428.24

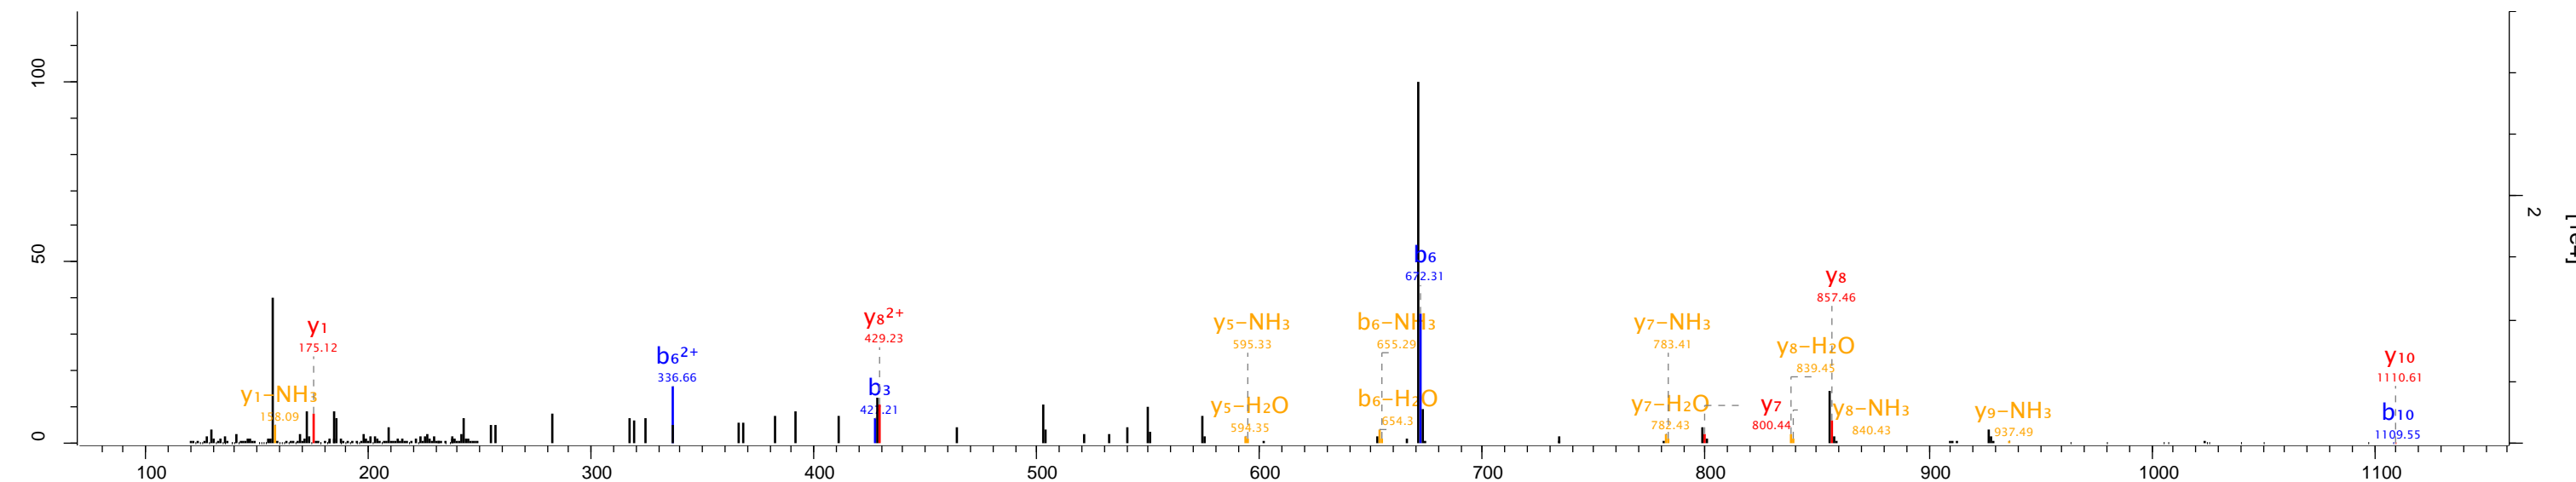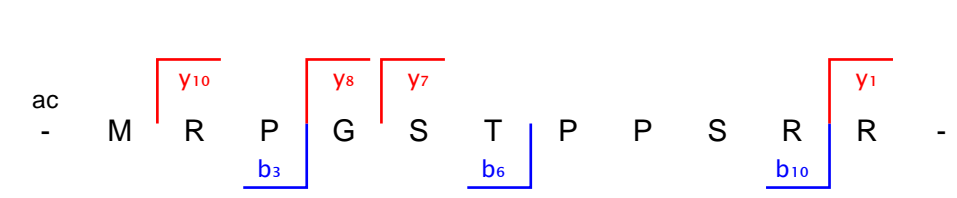

Spectral Annotation for Single-Peptide IDs in 16-cell Embryo using Q-OT-LIT

Raw file: 2015-01-05\_CL03\_XenEmb\_x2  
 Scan: 25165 Method: ITMS; HCD Score: 77.74 m/z: 657.88

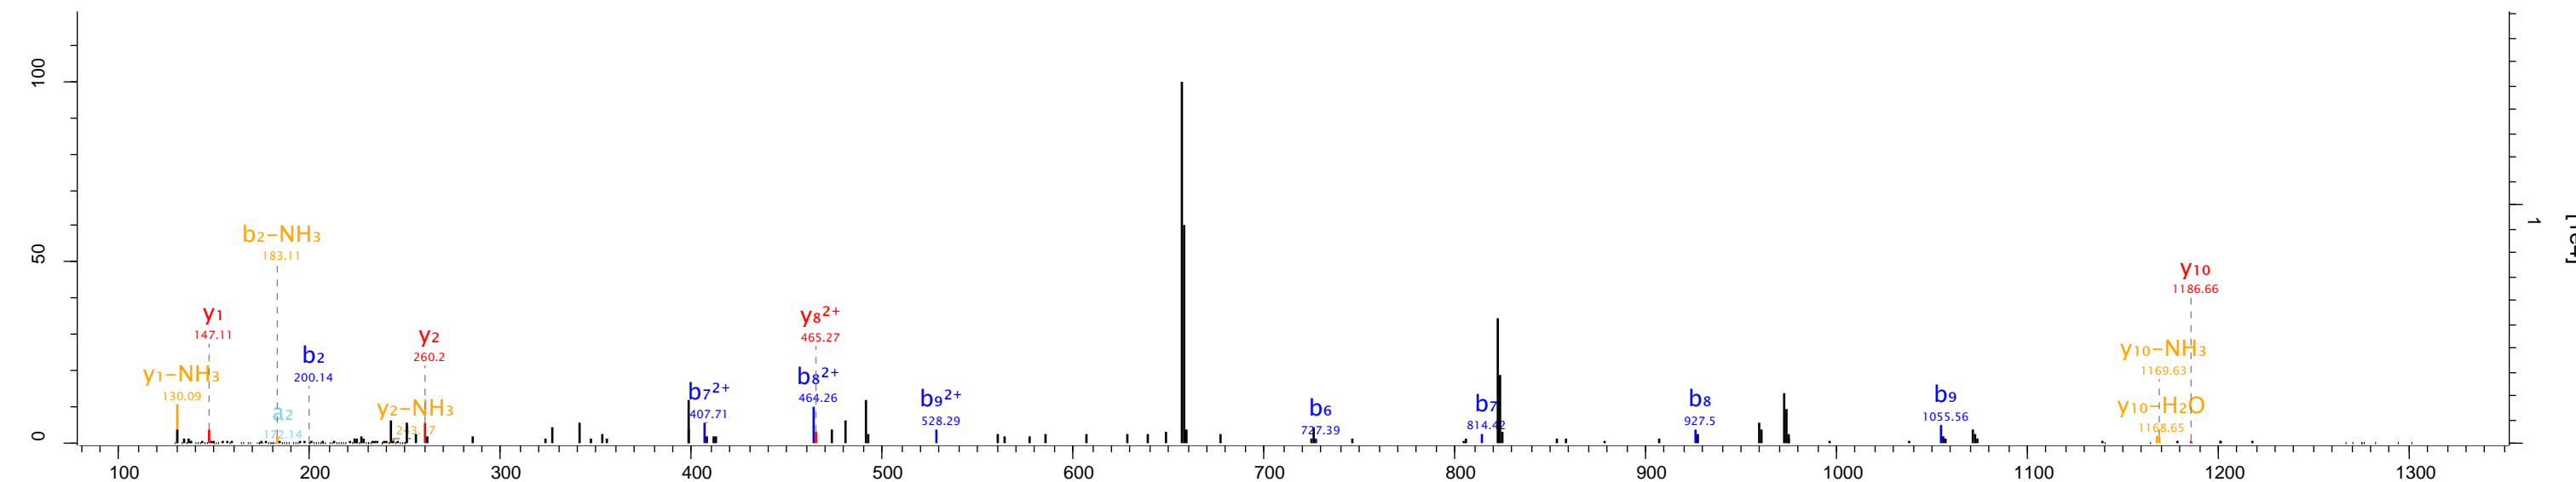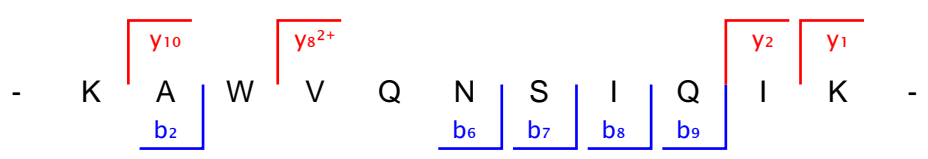

Spectral Annotation for Single-Peptide IDs in 16-cell Embryo using Q-OT-LIT

Raw file: 2015-01-05\_CL03\_XenEmb\_x2  
 Scan: 25171 Method: ITMS; HCD Score: 118.23 m/z: 696.69

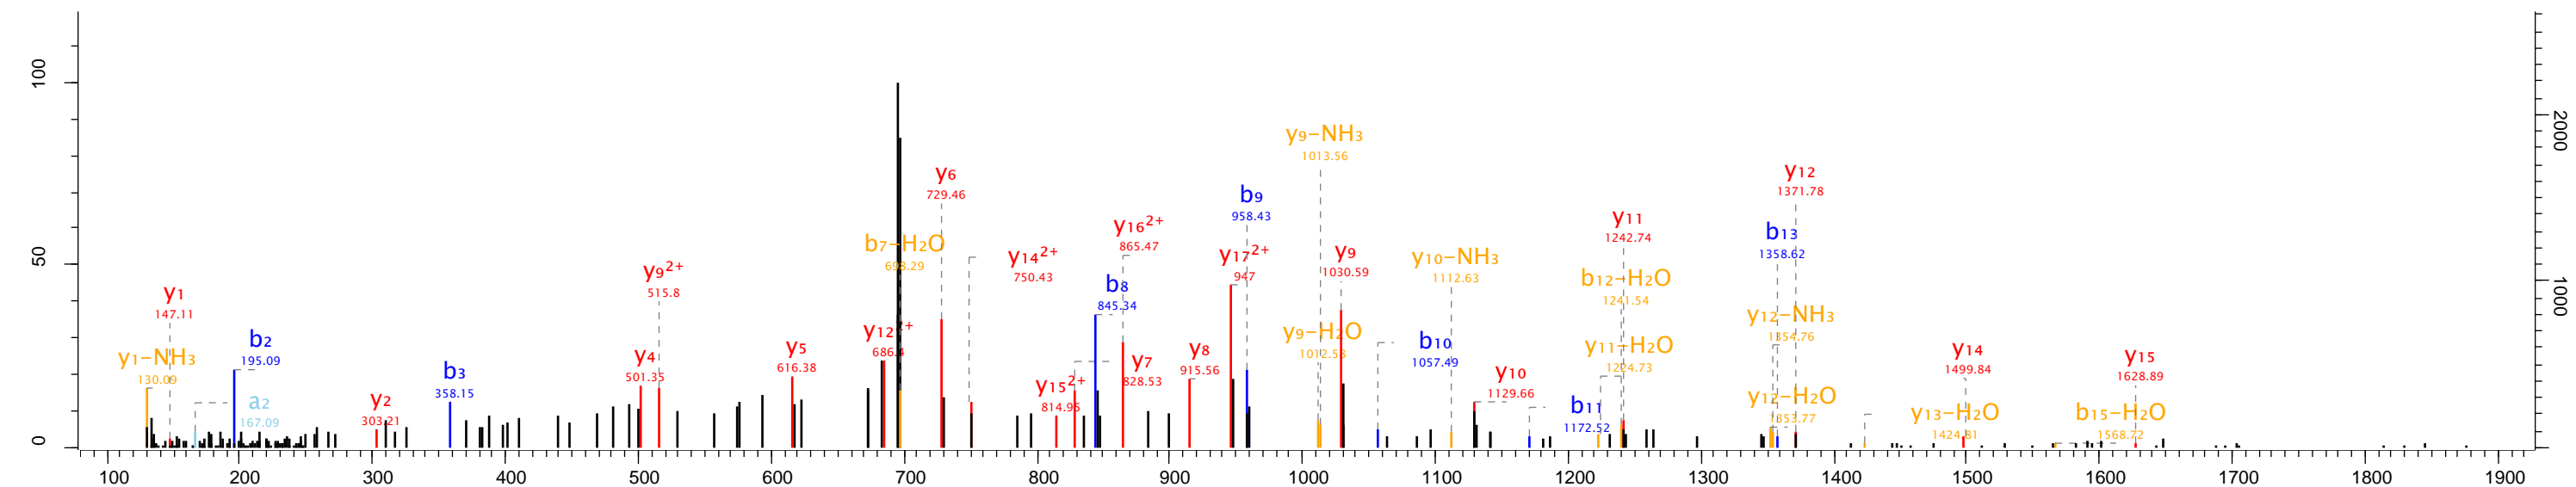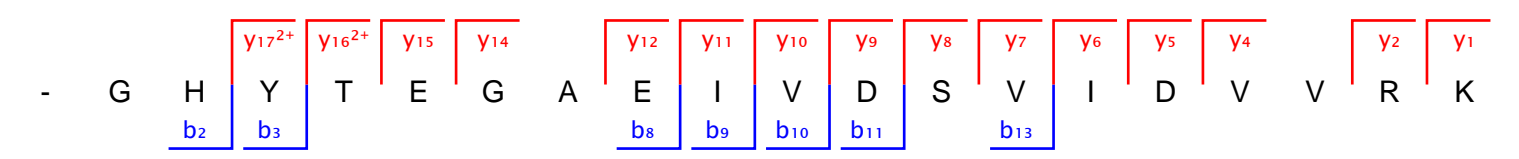



Raw file: 2015-01-05\_CL03\_XenEmb\_x2  
 Scan: 25185 Method: ITMS; HCD Score: 116.04 m/z: 696.36

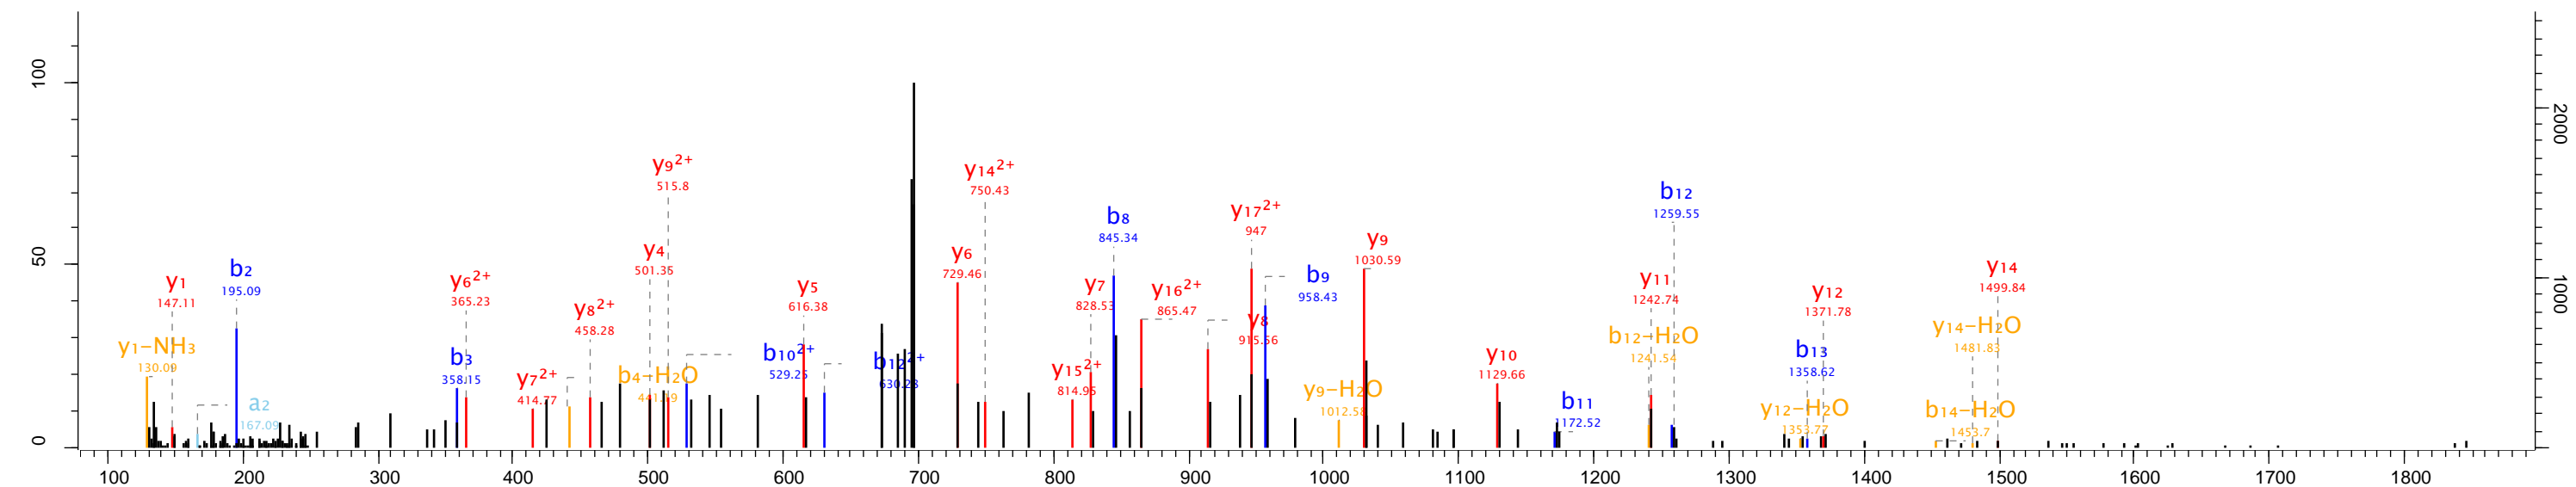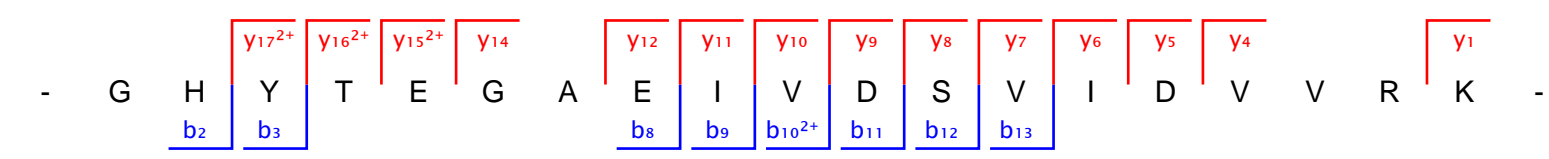

Spectral Annotation for Single-Peptide IDs in 16-cell Embryo using Q-OT-LIT

Raw file: 2015-01-05\_CL03\_XenEmb\_x2  
 Scan: 25340 Method: ITMS; HCD Score: 88.32 m/z: 528.52

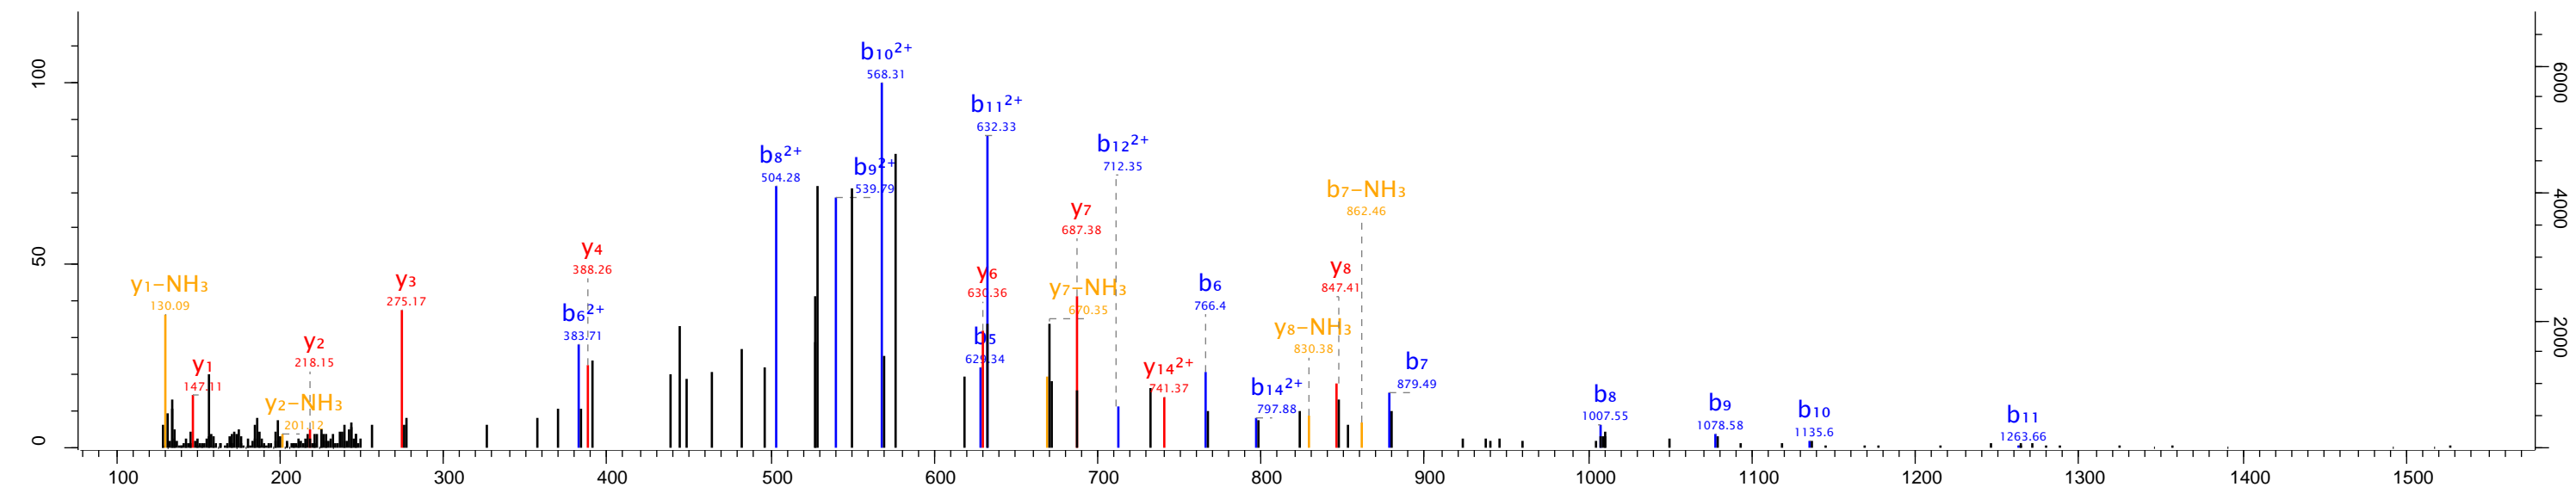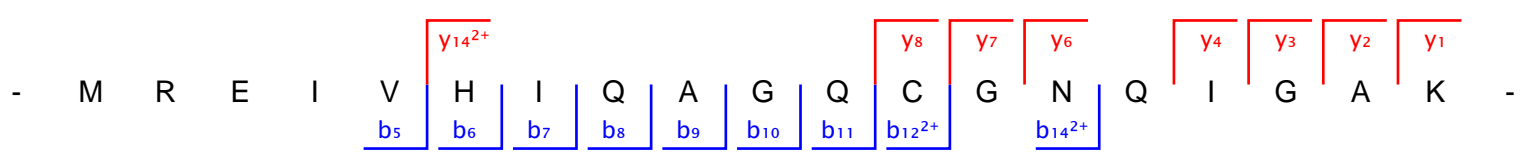

Raw file: 2015-01-05\_CL03\_XenEmb\_x2  
 Scan: 25354  
 Method: ITMS; HCD  
 Score: 60.26  
 m/z: 469.9

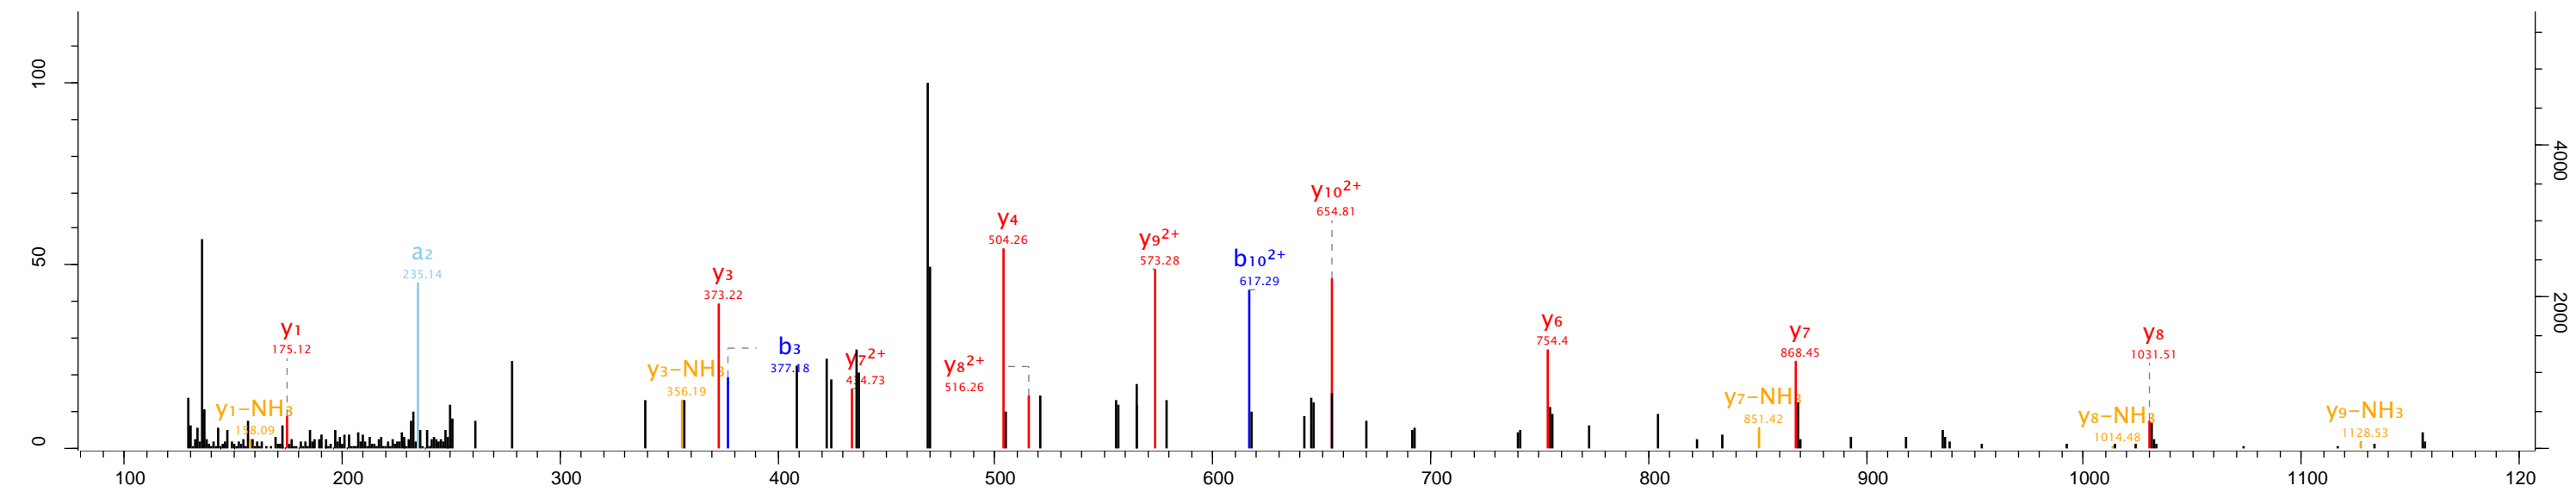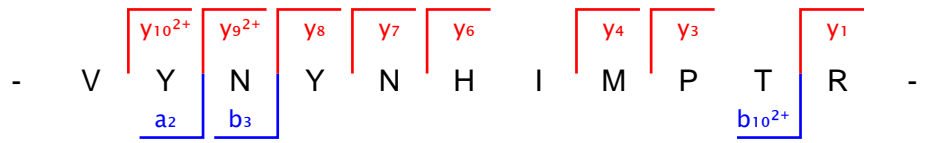

Spectral Annotation for Single-Peptide IDs in 16-cell Embryo using Q-OT-LIT

Raw file: 2015-01-05\_CL03\_XenEmb\_x2  
 Scan: 25356 Method: ITMS; HCD Score: 94.64 m/z: 528.52

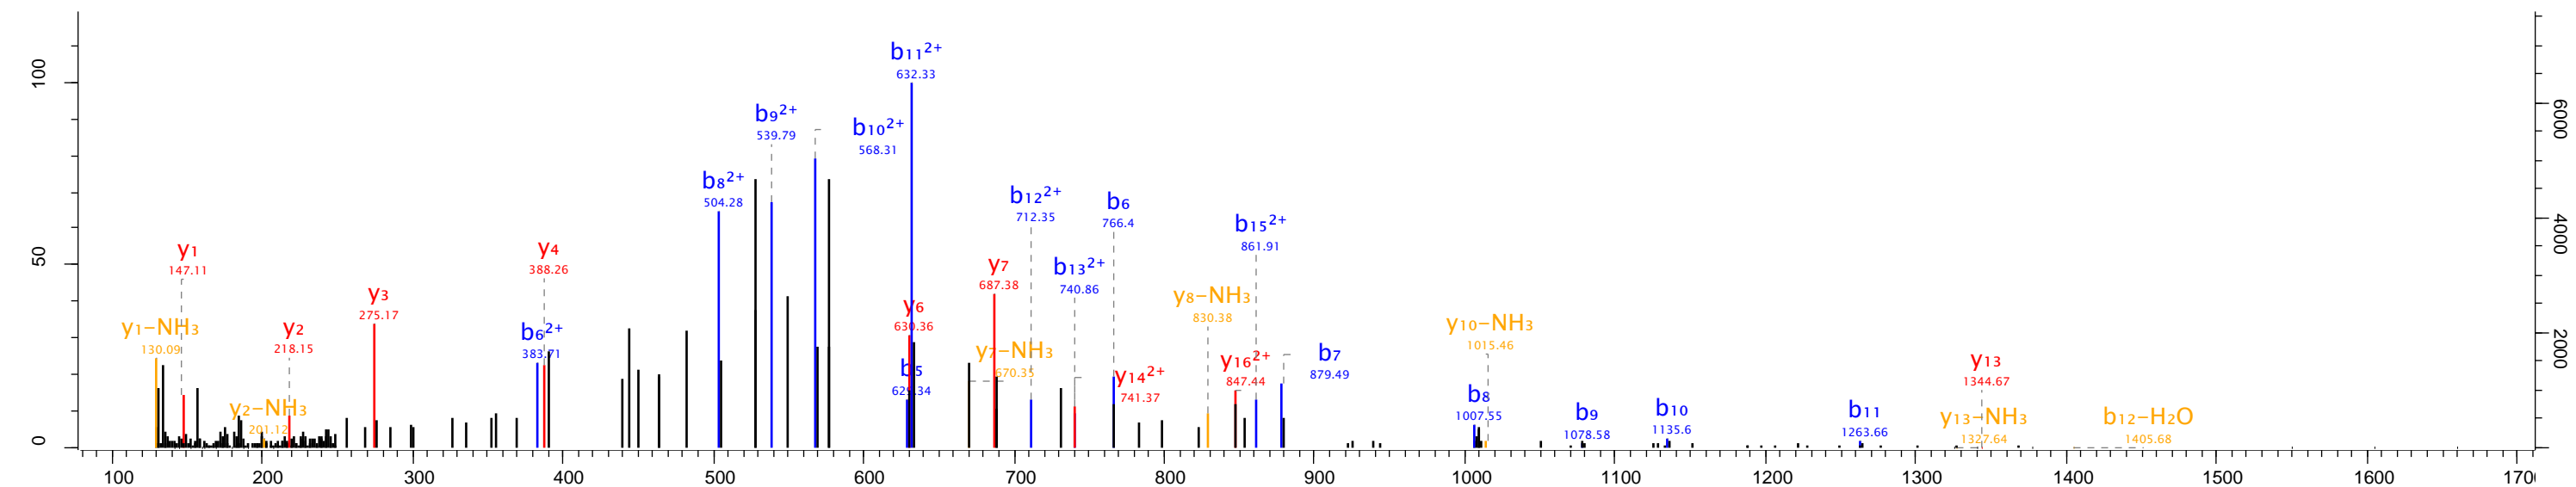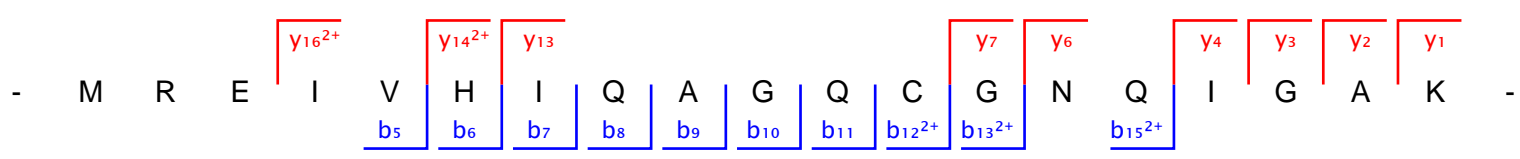

Raw file: 2015-01-05\_CL03\_XenEmb\_x2  
 Scan: 25362 Method: ITMS; HCD Score: 39.92 m/z: 522.52

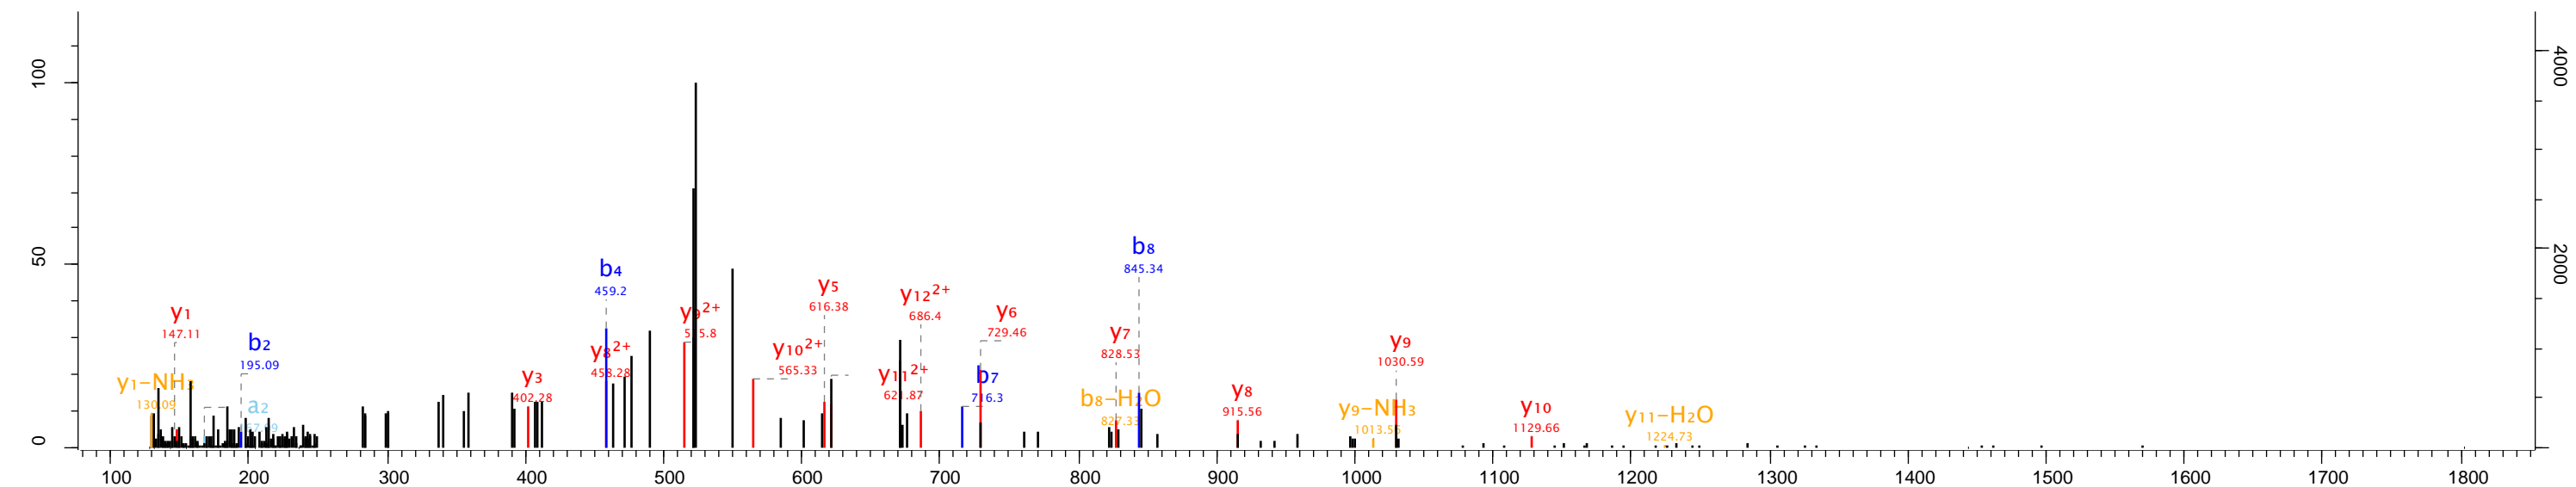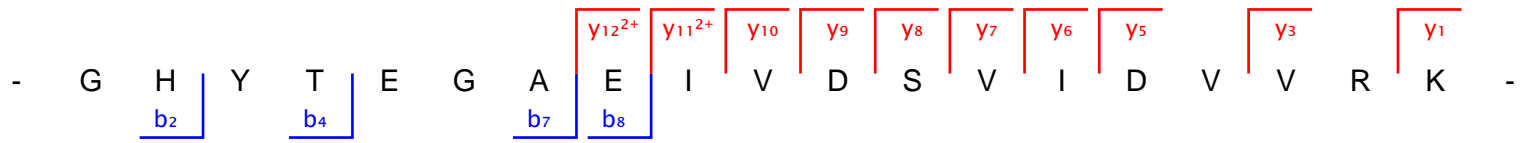

Spectral Annotation for Single-Peptide IDs in 16-cell Embryo using Q-OT-LIT

Raw file: 2015-01-05\_CL03\_XenEmb\_x2  
 Scan: 25371  
 Method: ITMS; HCD  
 Score: 105  
 m/z: 704.02

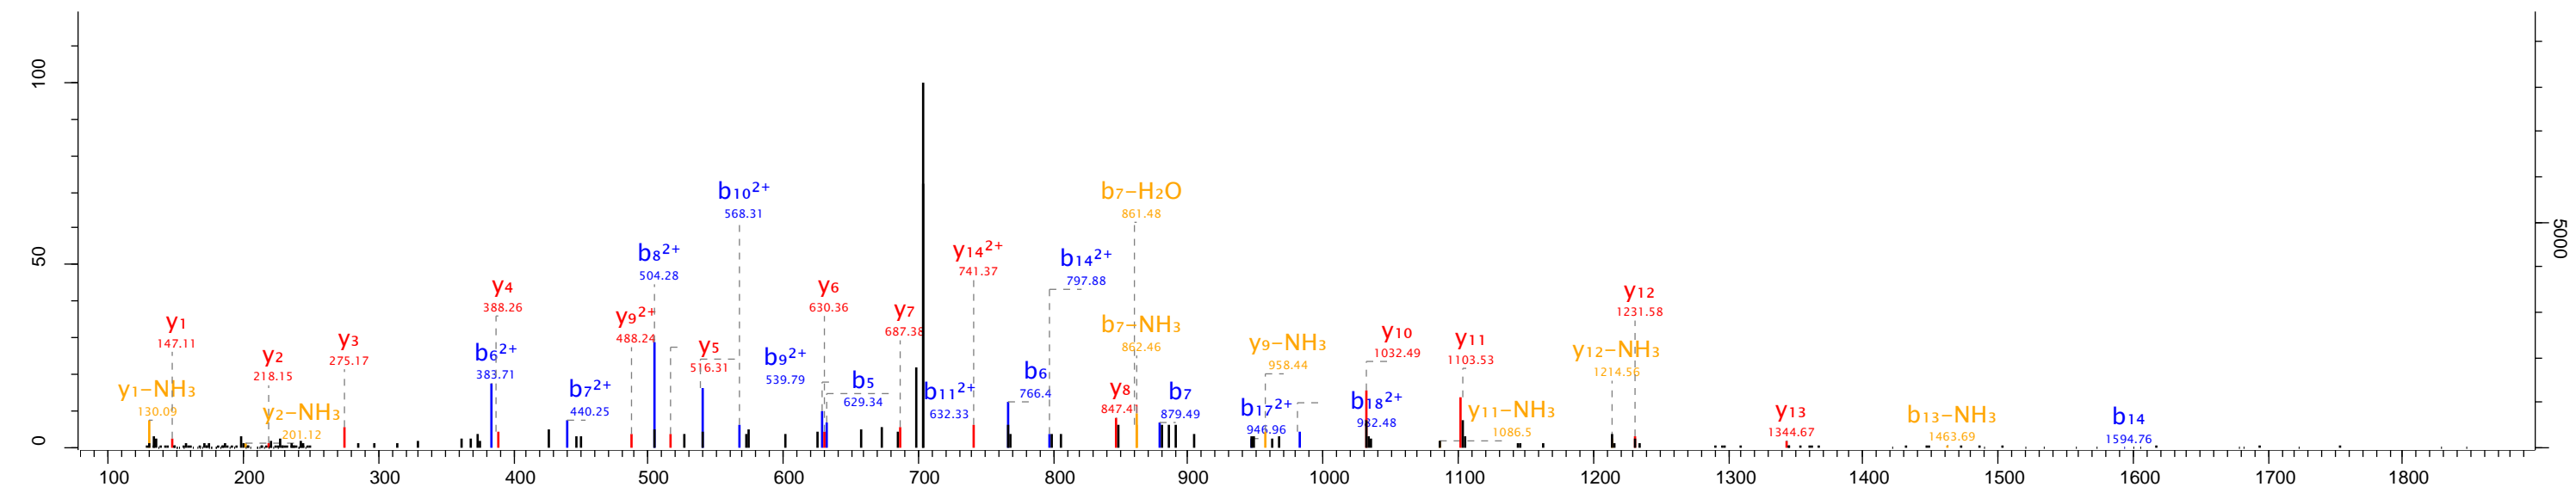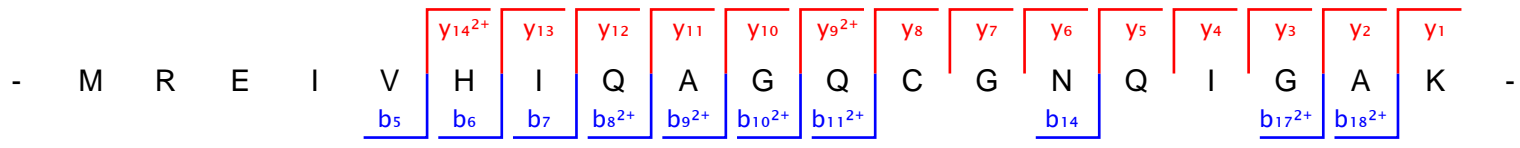

Spectral Annotation for Single-Peptide IDs in 16-cell Embryo using Q-OT-LIT

Raw file Scan Method Score m/z  
 2015-01-05\_CL03\_XenEmb\_x2 25376 ITMS; HCD 49.92 522.77

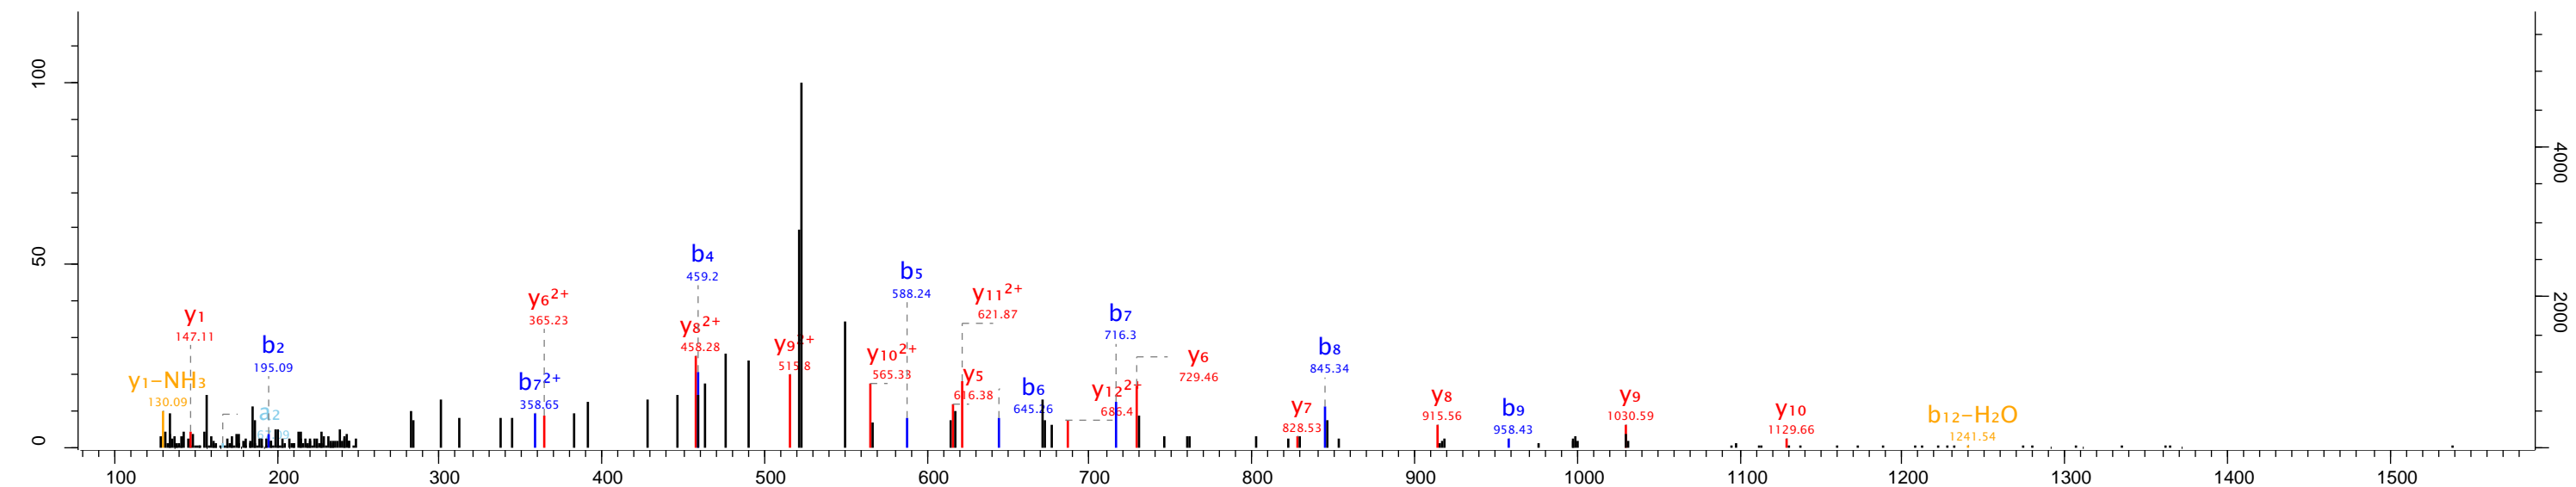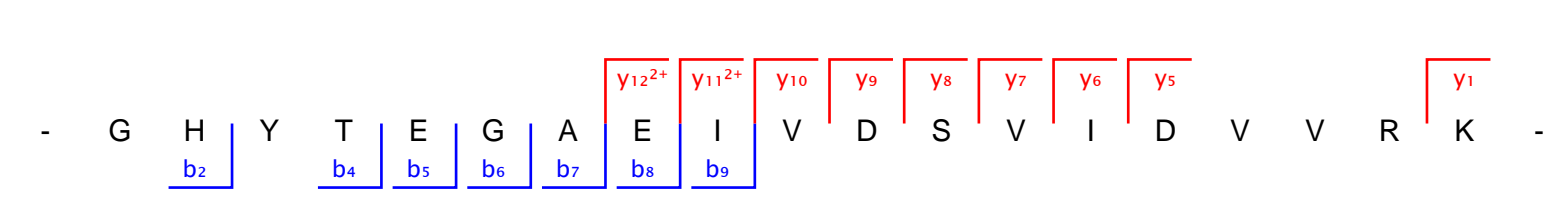

Raw file 2015-01-05\_CL03\_XenEmb\_x2 Scan 25404 Method ITMS; HCD Score 202.34 m/z 696.7

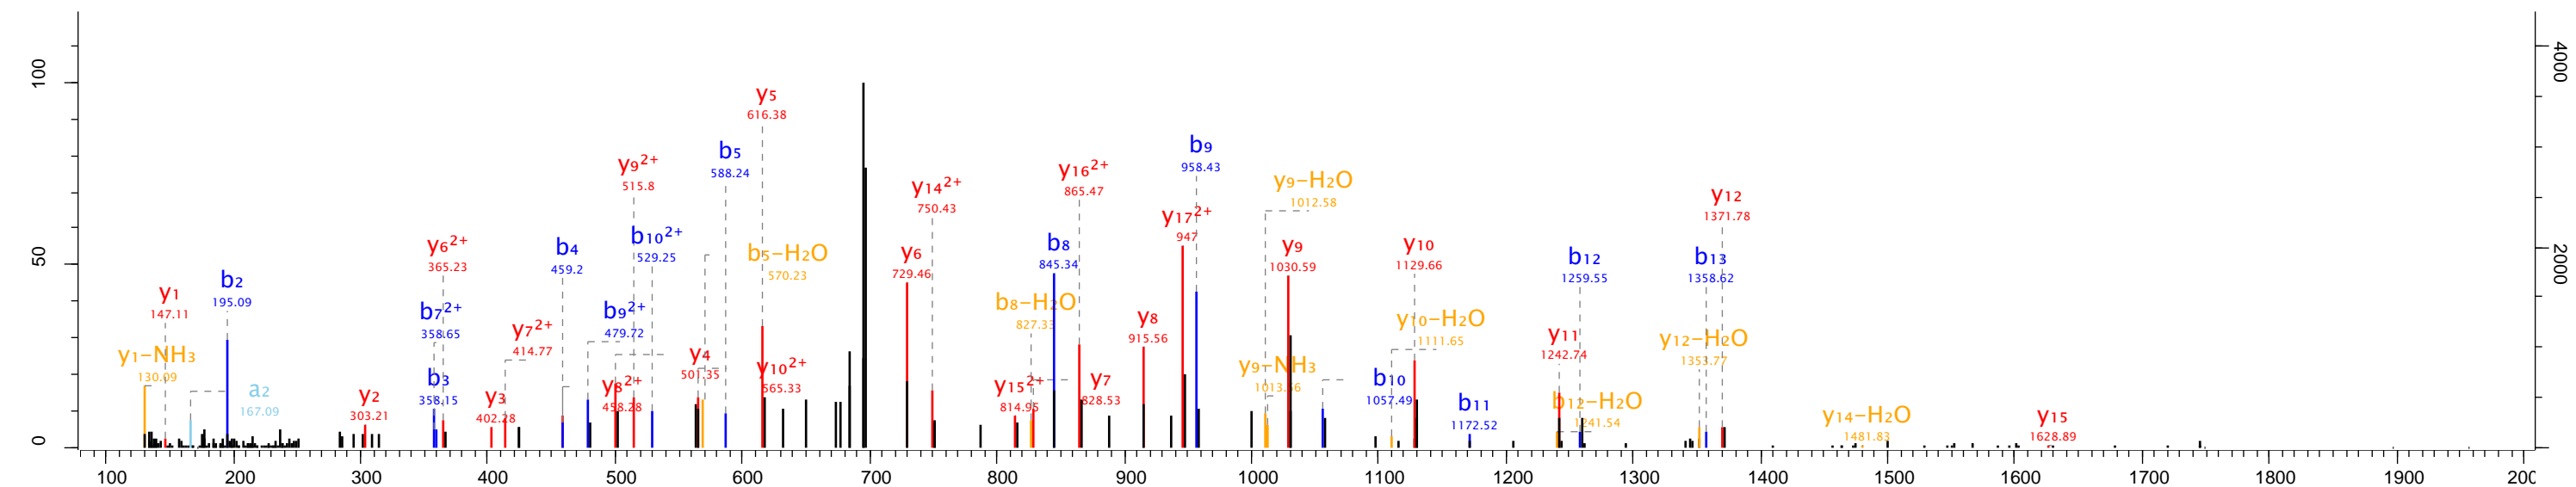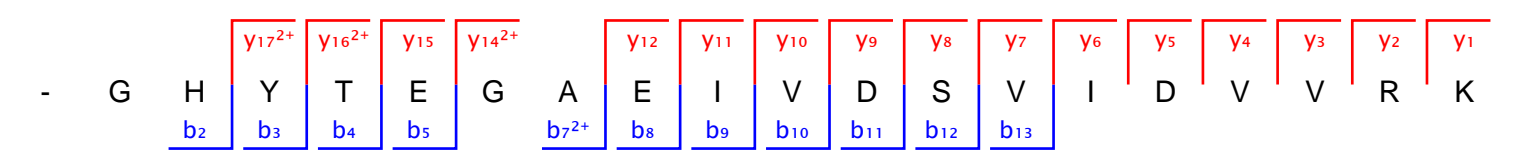

Spectral Annotation for Single-Peptide IDs in 16-cell Embryo using Q-OT-LIT



Raw file 2015-01-05\_CL03\_XenEmb\_x2 Scan 25432 Method ITMS; HCD Score 65.18 m/z 433.59

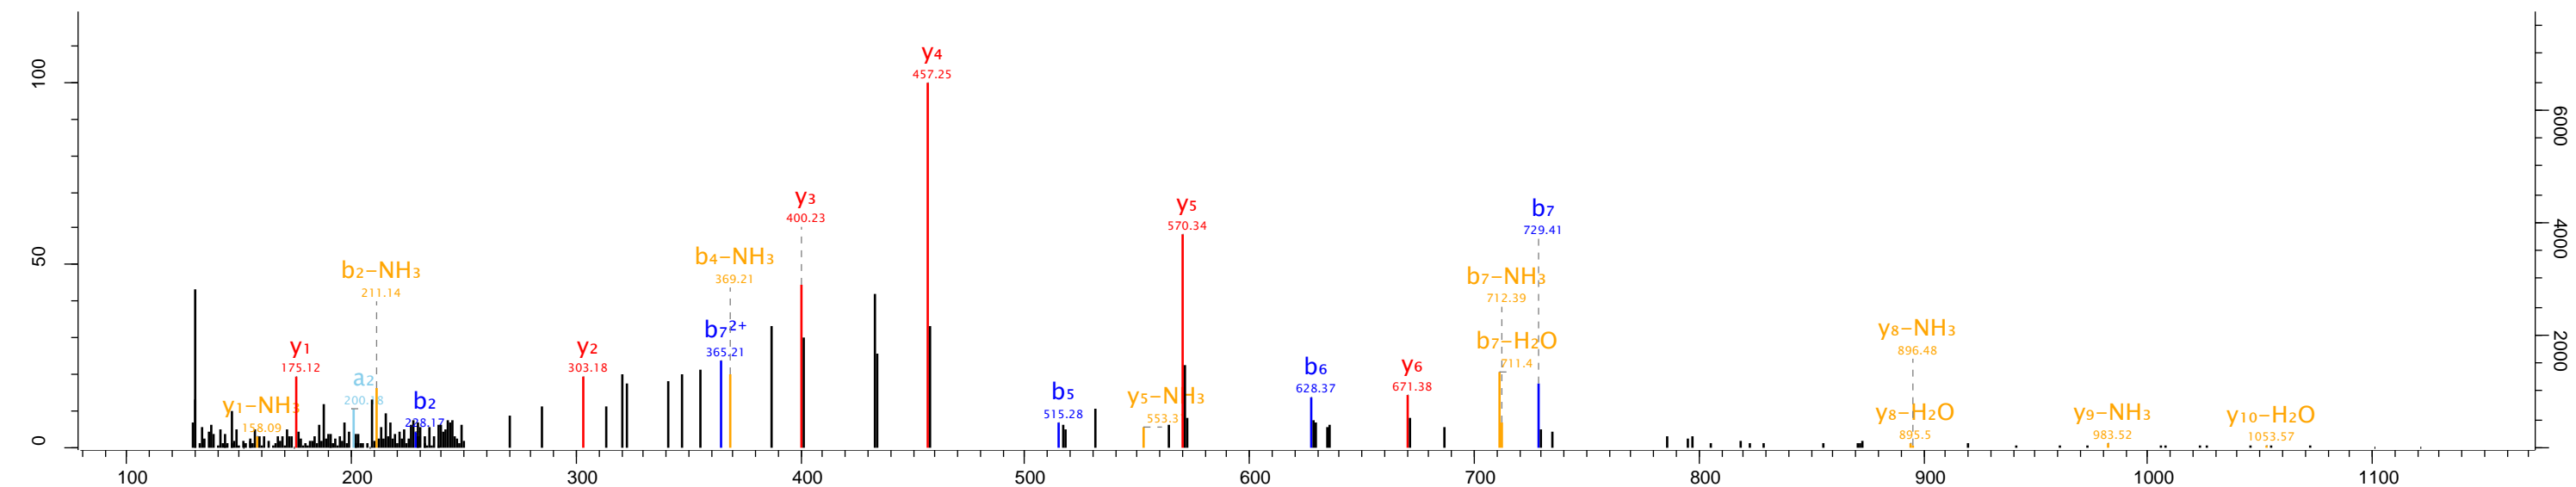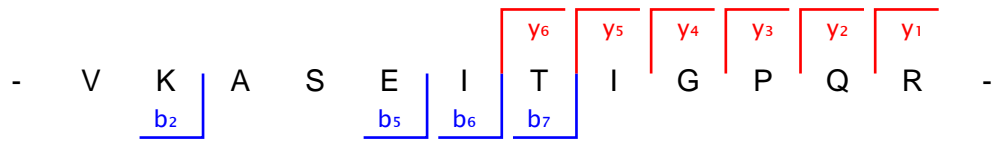

Raw file: 2015-01-05\_CL03\_XenEmb\_x2  
 Scan: 25442 Method: ITMS; HCD Score: 66.39 m/z: 649.87

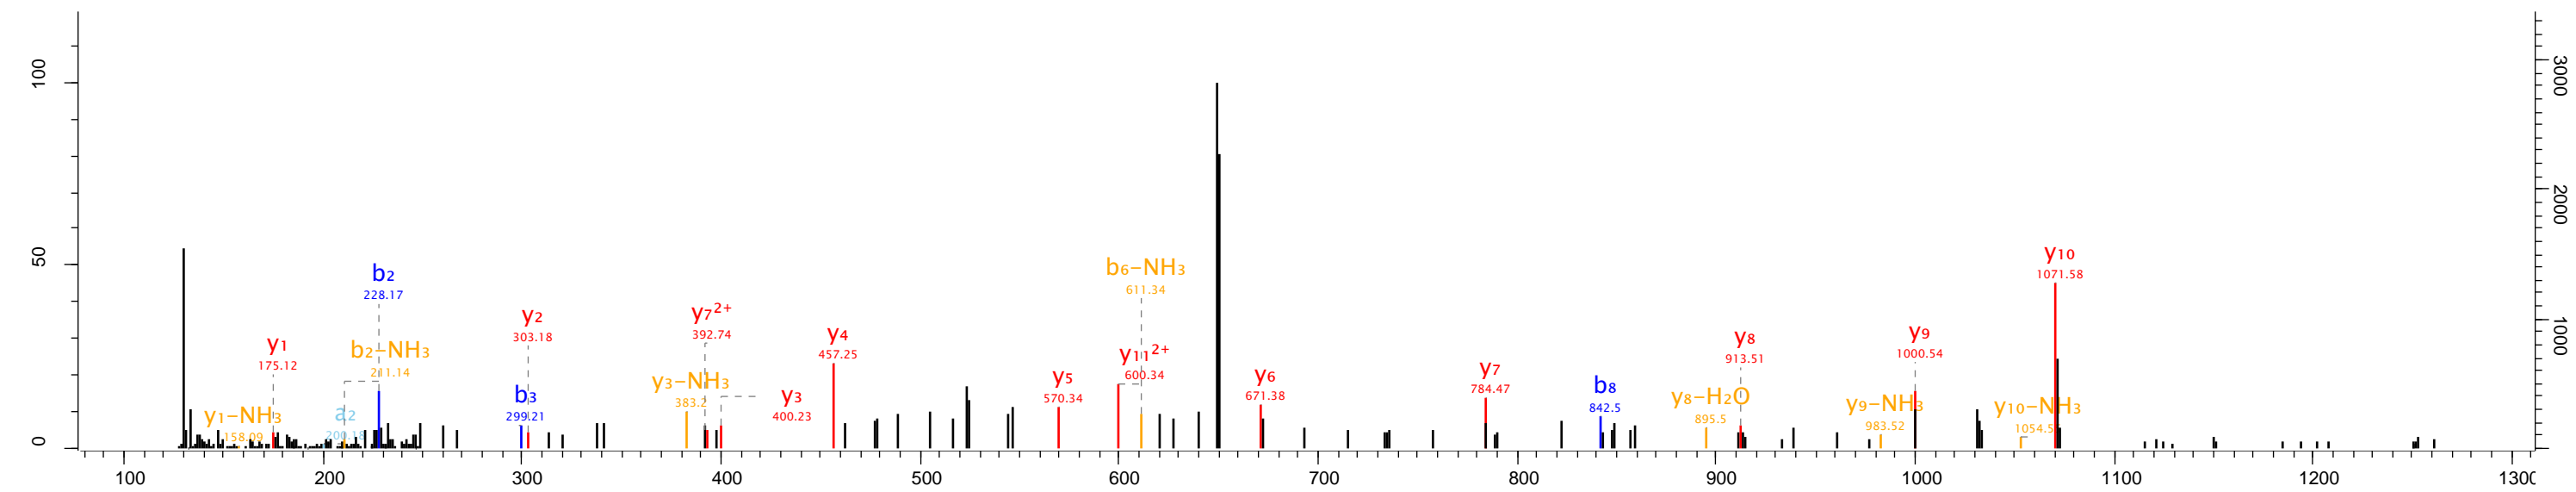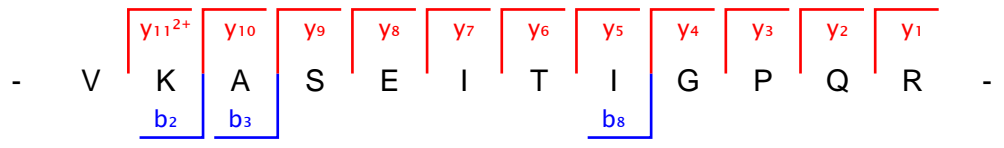

Spectral Annotation for Single-Peptide IDs in 16-cell Embryo using Q-OT-LIT

Raw file: 2015-01-05\_CL03\_XenEmb\_x2  
 Scan: 25449 Method: ITMS; HCD Score: 63.09 m/z: 433.58

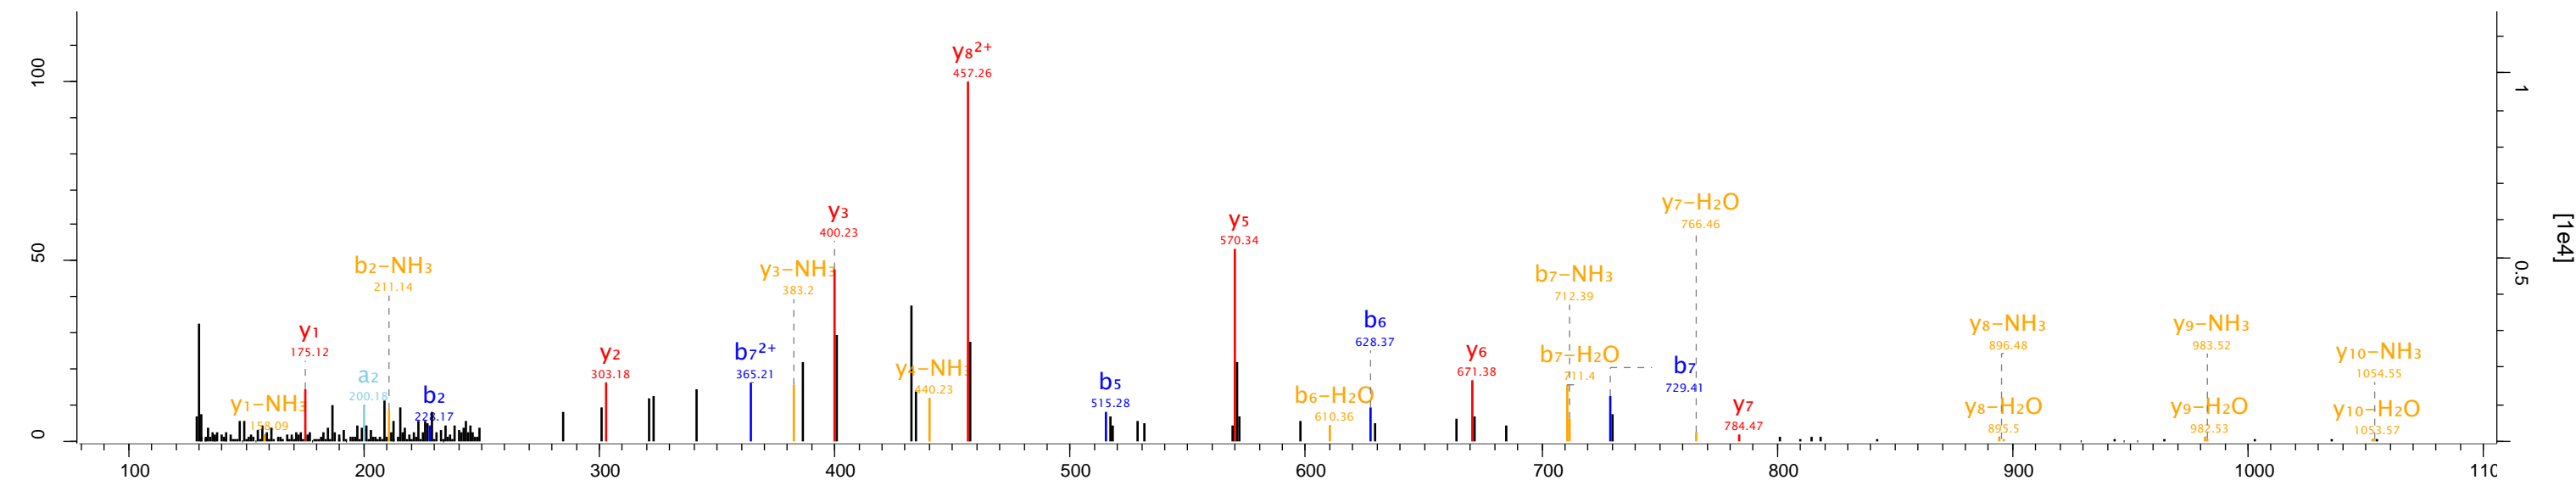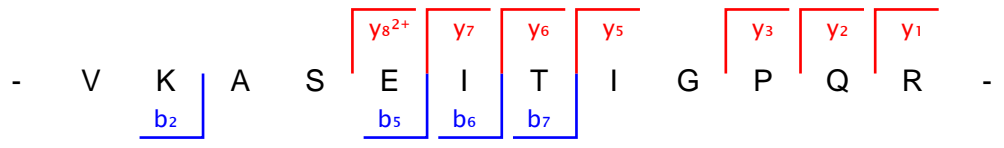

Raw file 2015-01-05\_CL03\_XenEmb\_x2 Scan 25459 Method ITMS; HCD Score 103.46 m/z 659.87

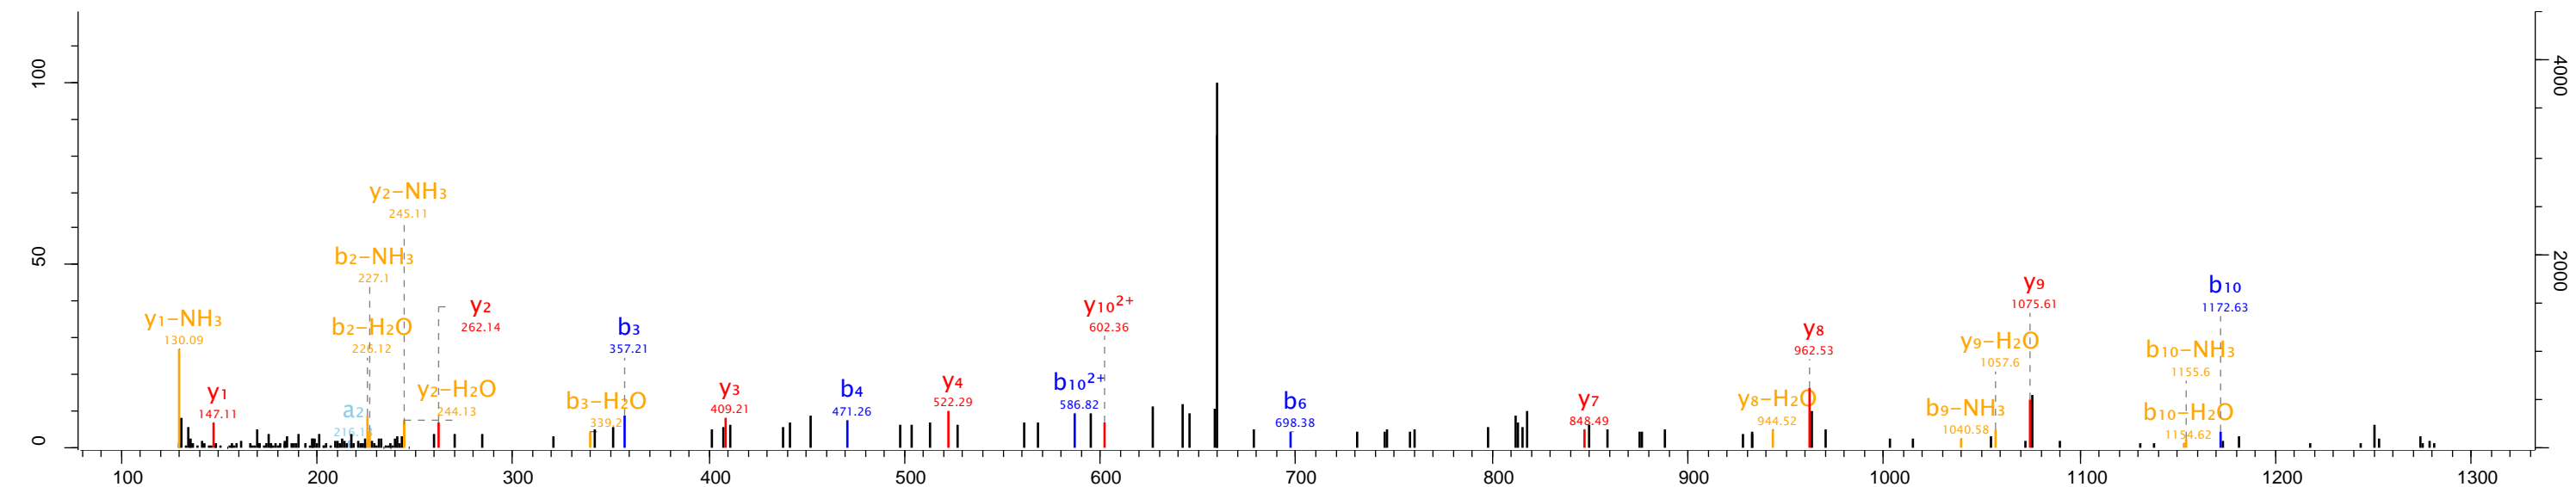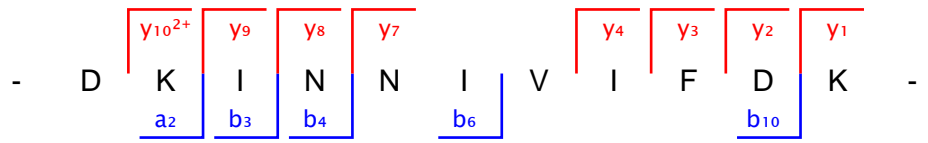

Raw file 2015-01-05\_CL03\_XenEmb\_x2 Scan 25461 Method ITMS; HCD Score 43.38 m/z 538.28

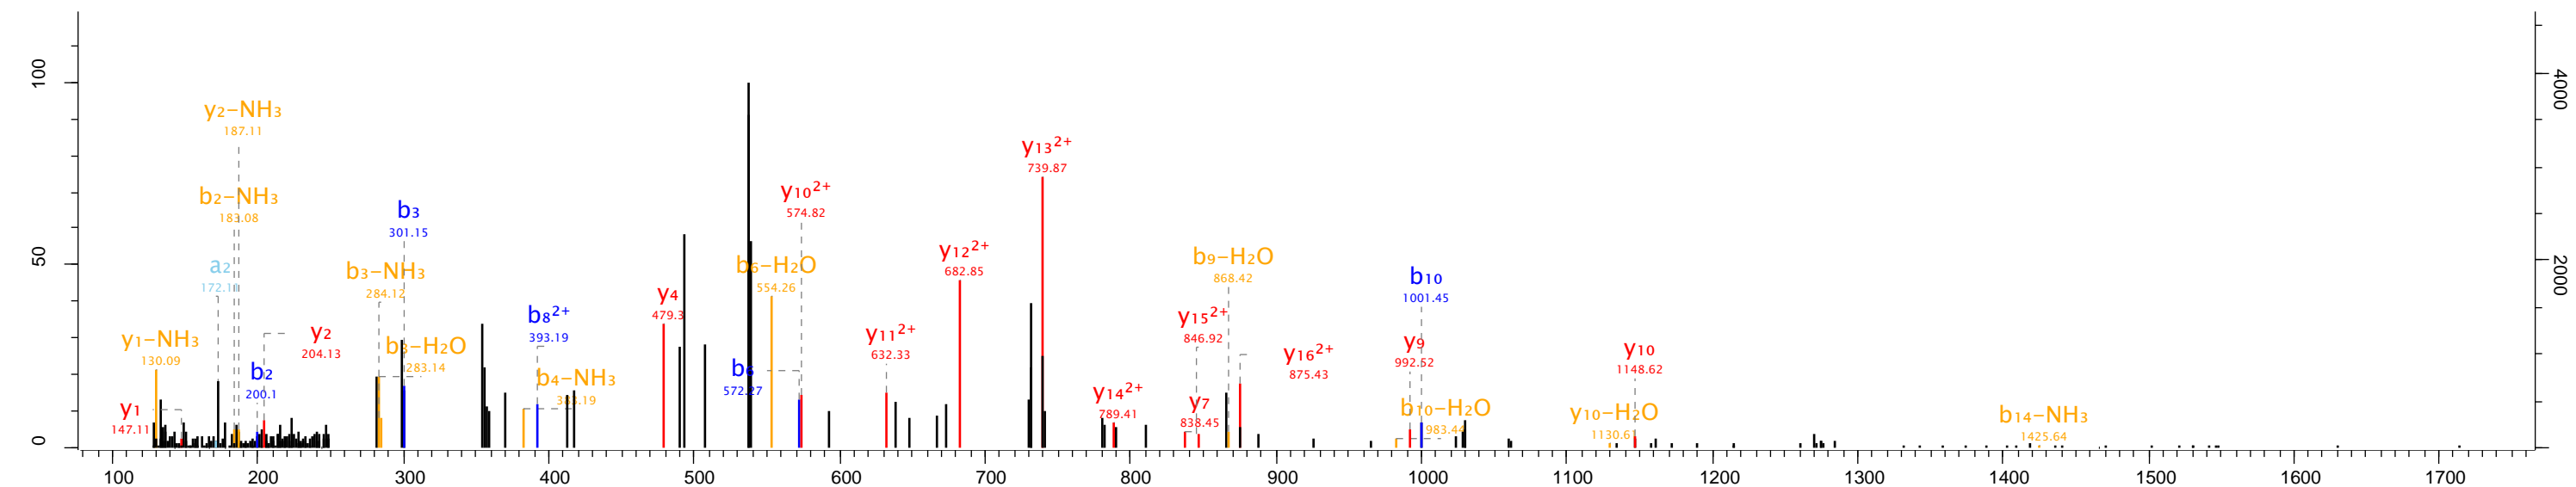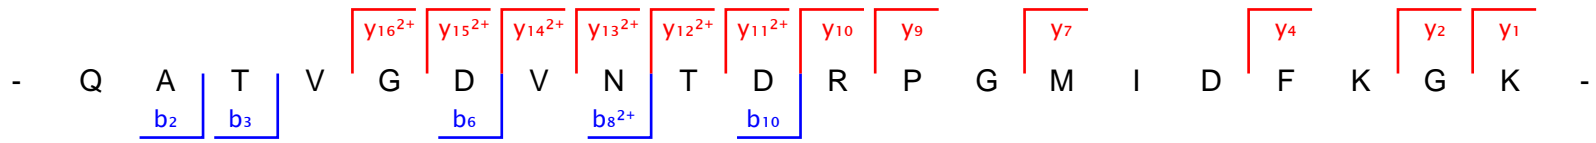

Spectral Annotation for Single-Peptide IDs in 16-cell Embryo using Q-OT-LIT

Raw file 2015-01-05\_CL03\_XenEmb\_x2 Scan 25468 Method ITMS; HCD Score 179.9 m/z 696.7

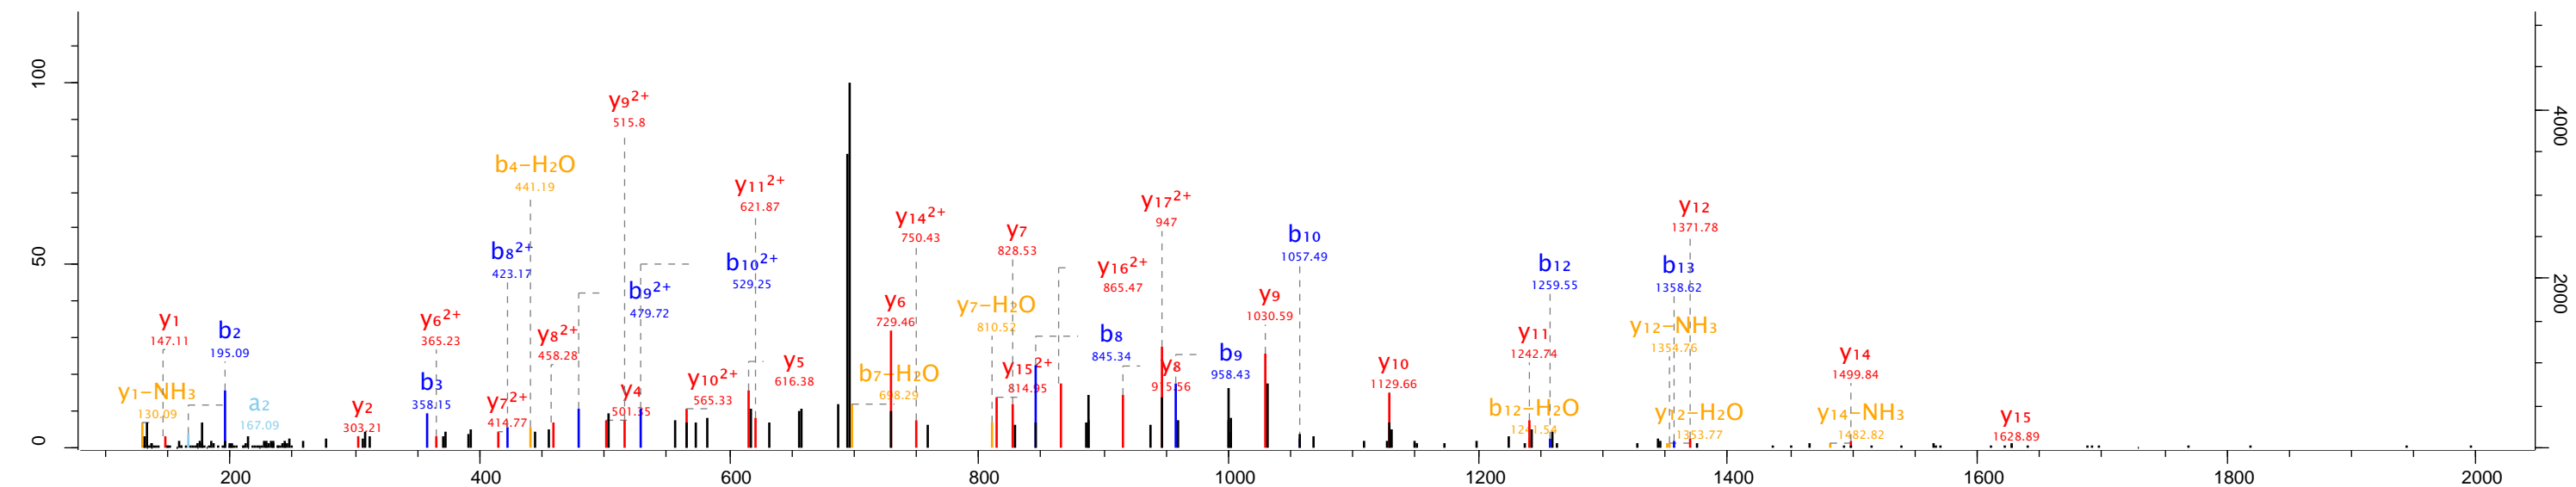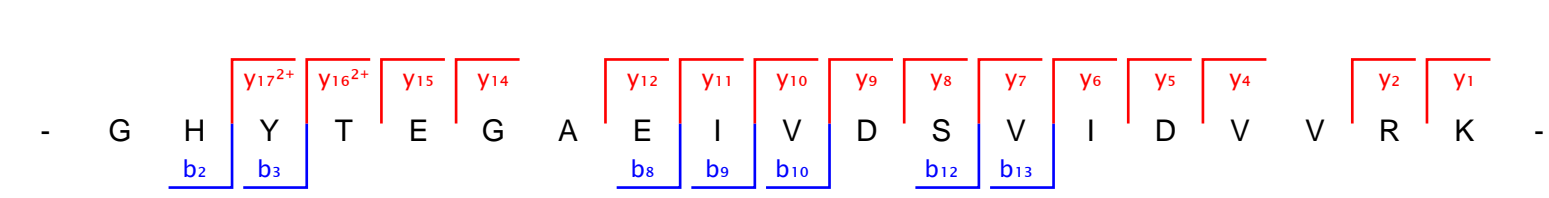

Raw file 2015-01-05\_CL03\_XenEmb\_x2 Scan 25471 Method ITMS; HCD Score 91.96 m/z 433.59

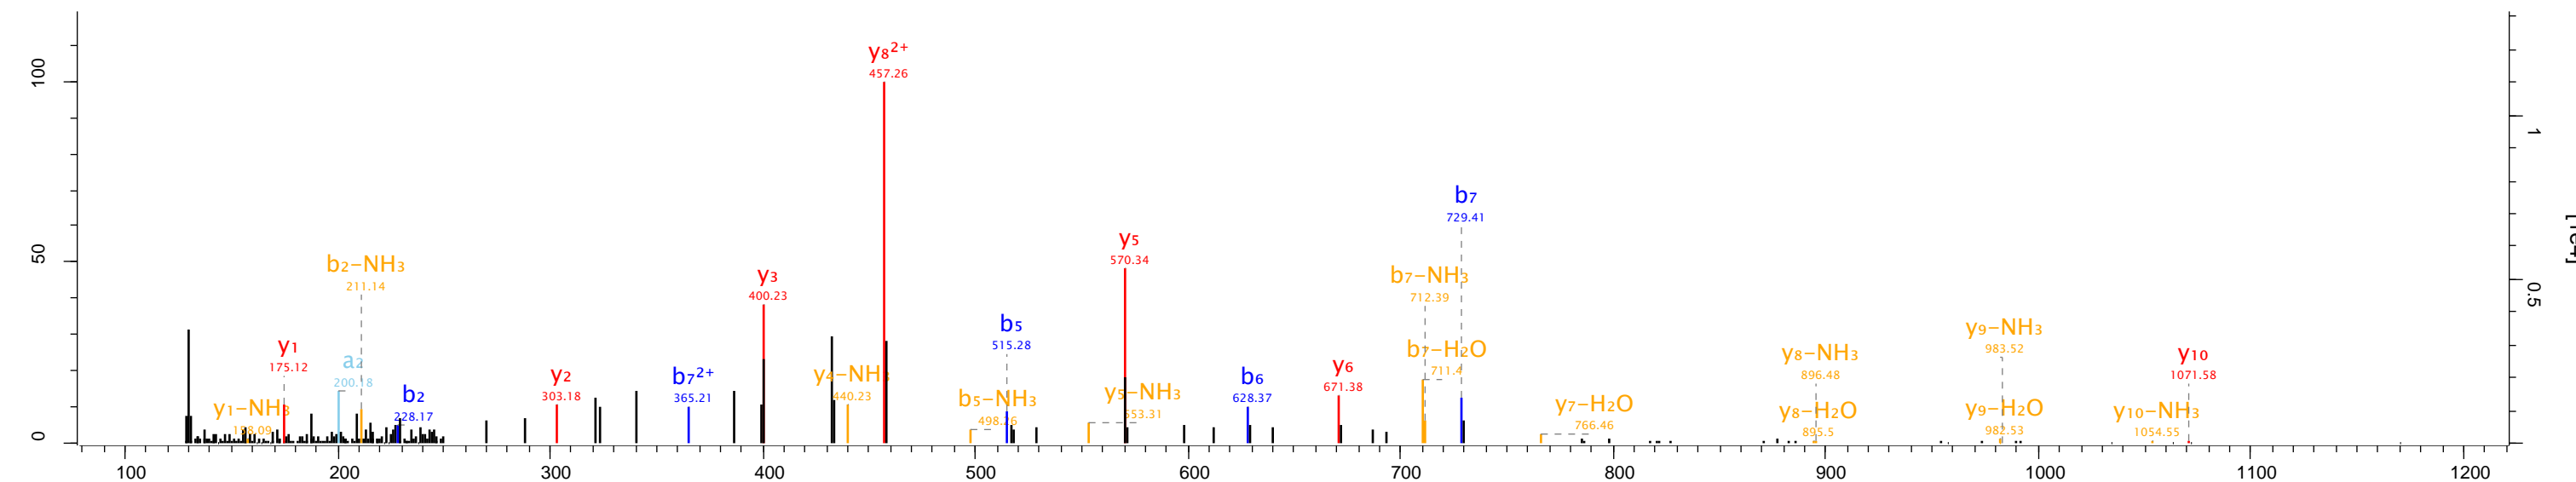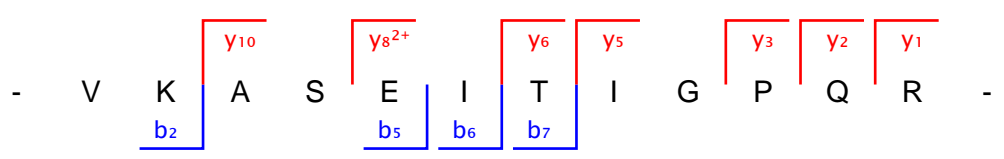

Raw file: 2015-01-05\_CL03\_XenEmb\_x2  
 Scan: 25491 Method: ITMS; HCD Score: 82.87 m/z: 696.36

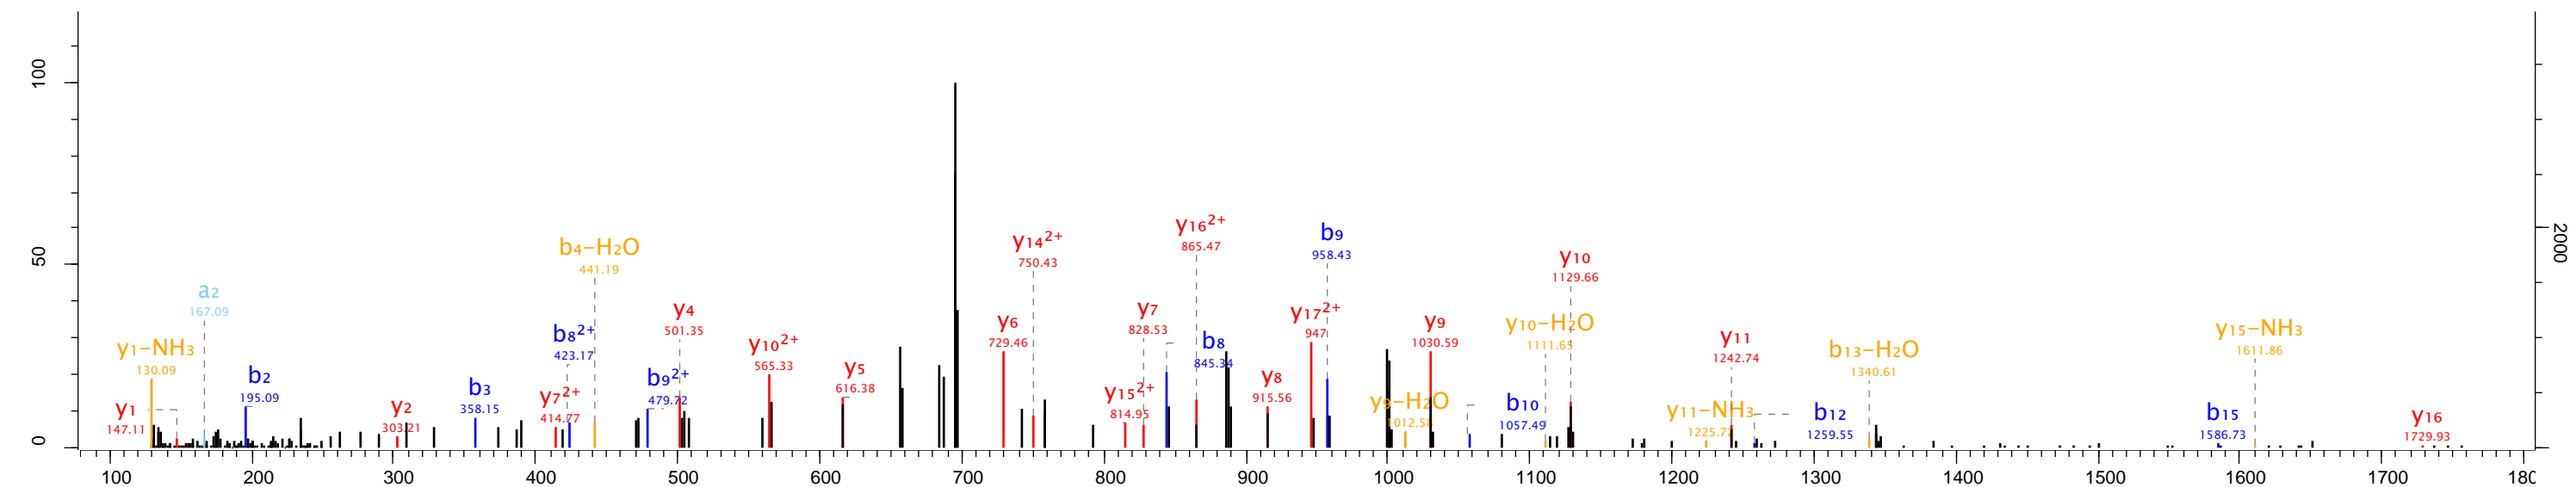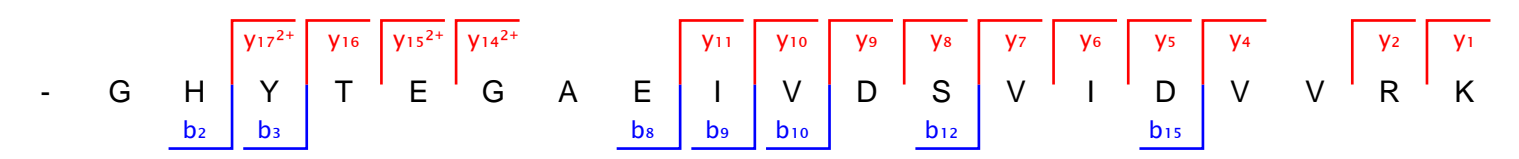

Spectral Annotation for Single-Peptide IDs in 16-cell Embryo using Q-OT-LIT



Raw file: 2015-01-05\_CL03\_XenEmb\_x2  
 Scan: 25501  
 Method: ITMS; HCD  
 Score: 77.6  
 m/z: 422.27

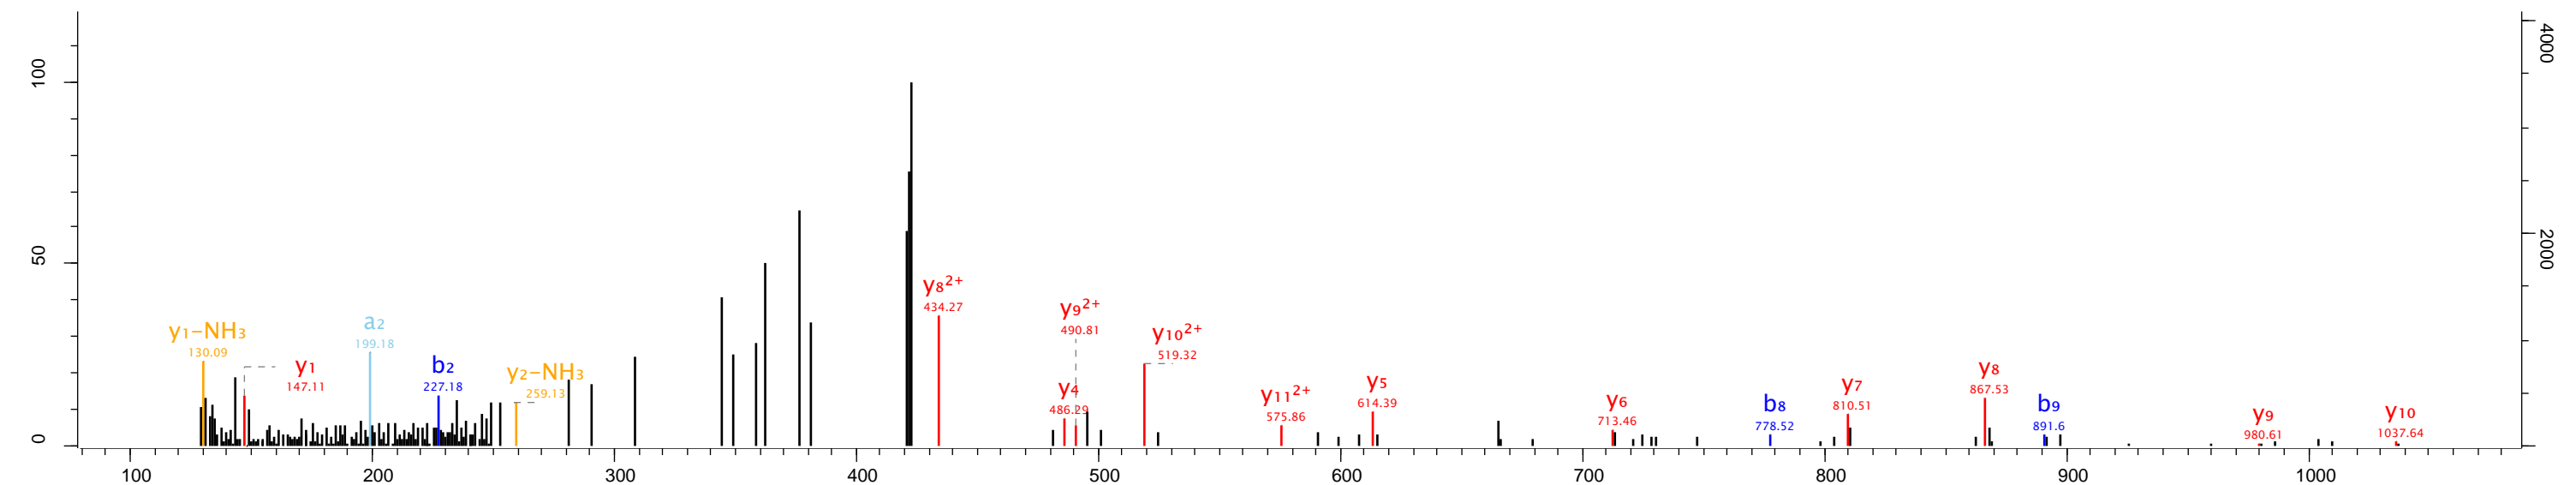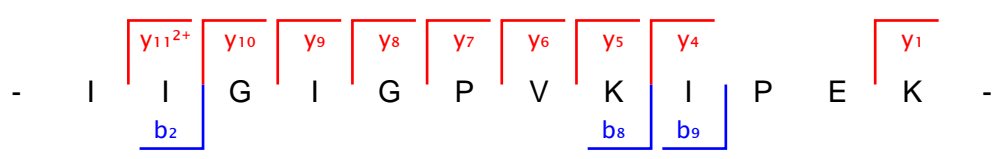

Raw file: 2015-01-05\_CL03\_XenEmb\_x2  
 Scan: 25777 Method: ITMS; HCD Score: 49.45 m/z: 428.57

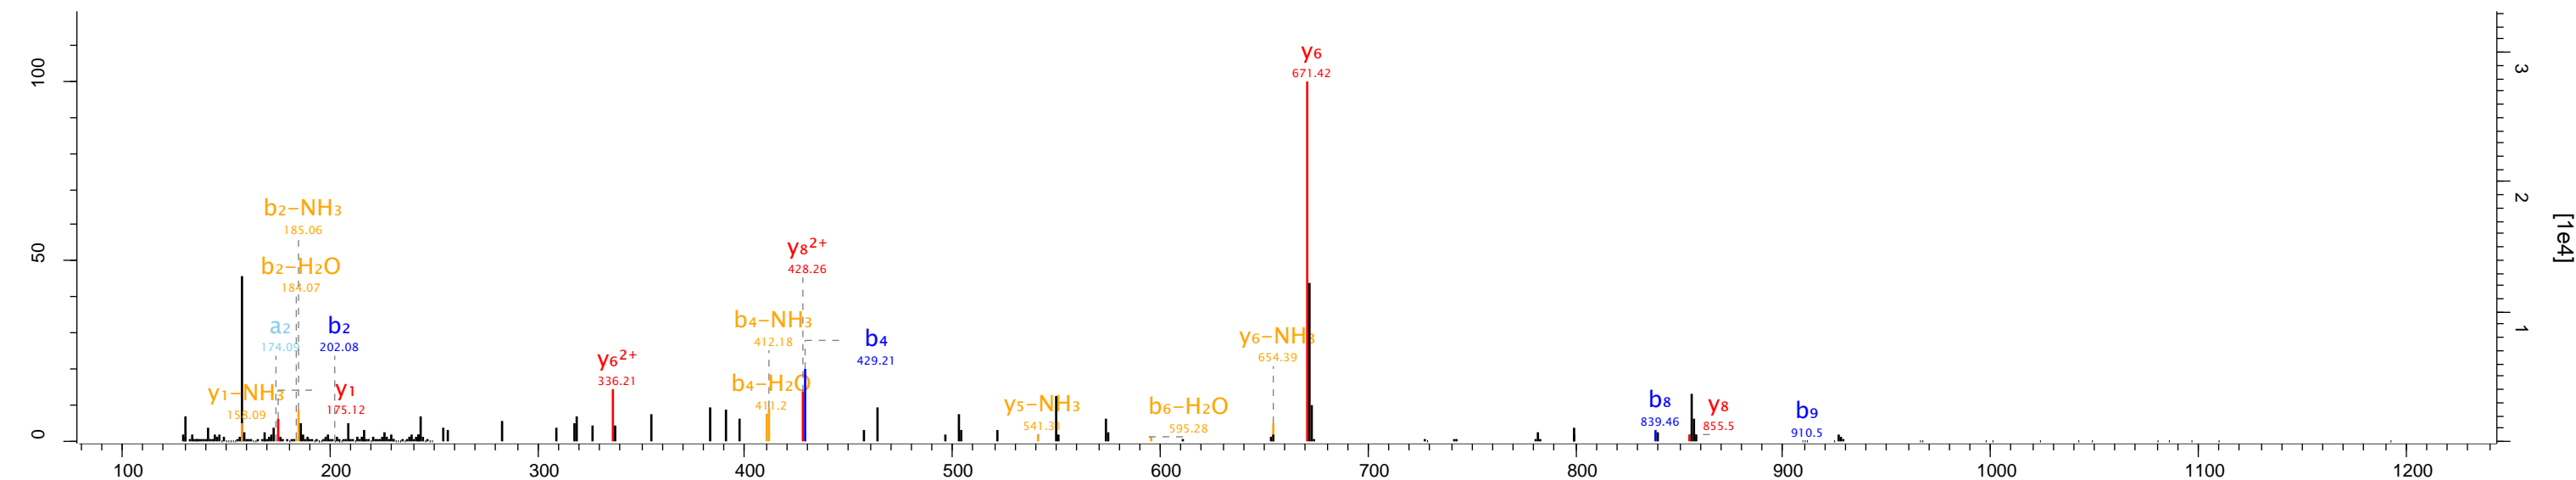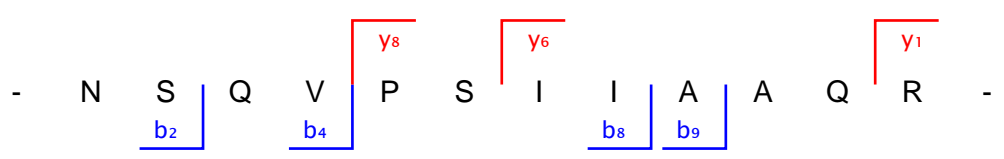

Raw file 2015-01-05\_CL03\_XenEmb\_x2 Scan 25827 Method ITMS; HCD Score 69.82 m/z 469.92

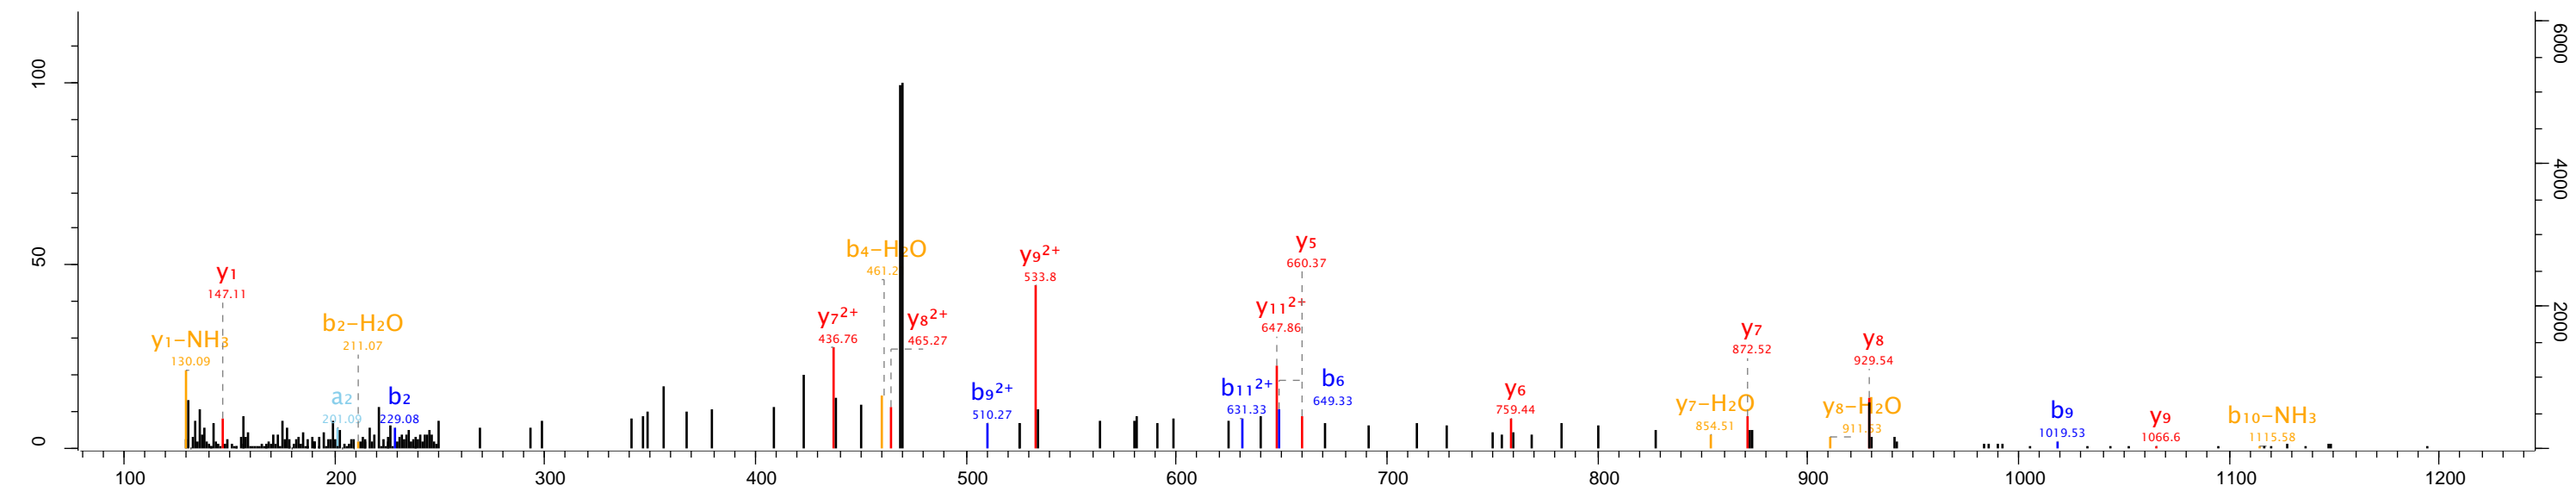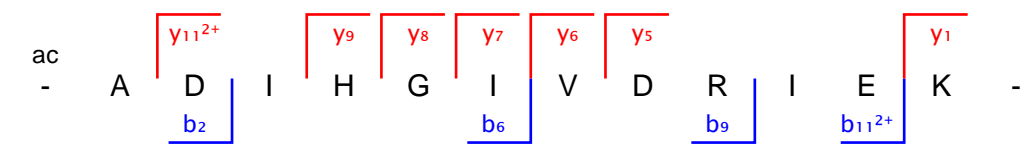

Raw file 2015-01-05\_CL03\_XenEmb\_x2 Scan 25937 Method ITMS; HCD Score 88.39 m/z 547.05

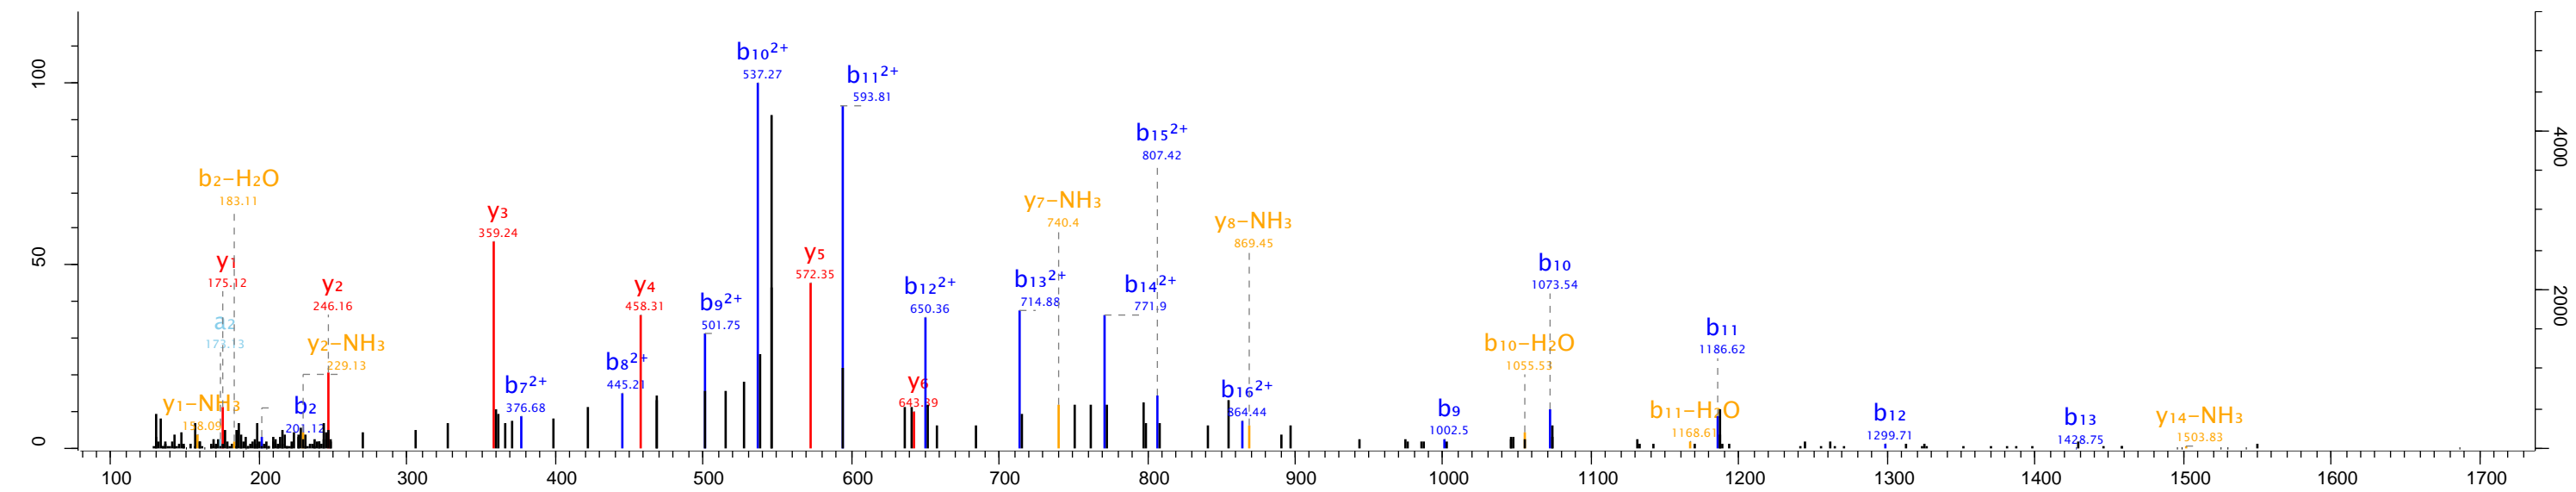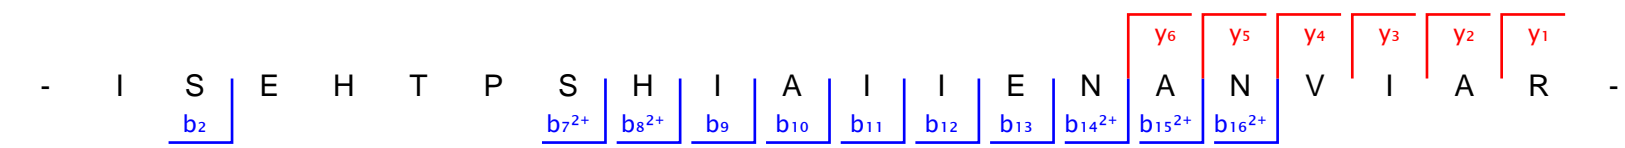

Raw file 2015-01-05\_CL03\_XenEmb\_x2 Scan 25956 Method ITMS; HCD Score 103.13 m/z 547.05

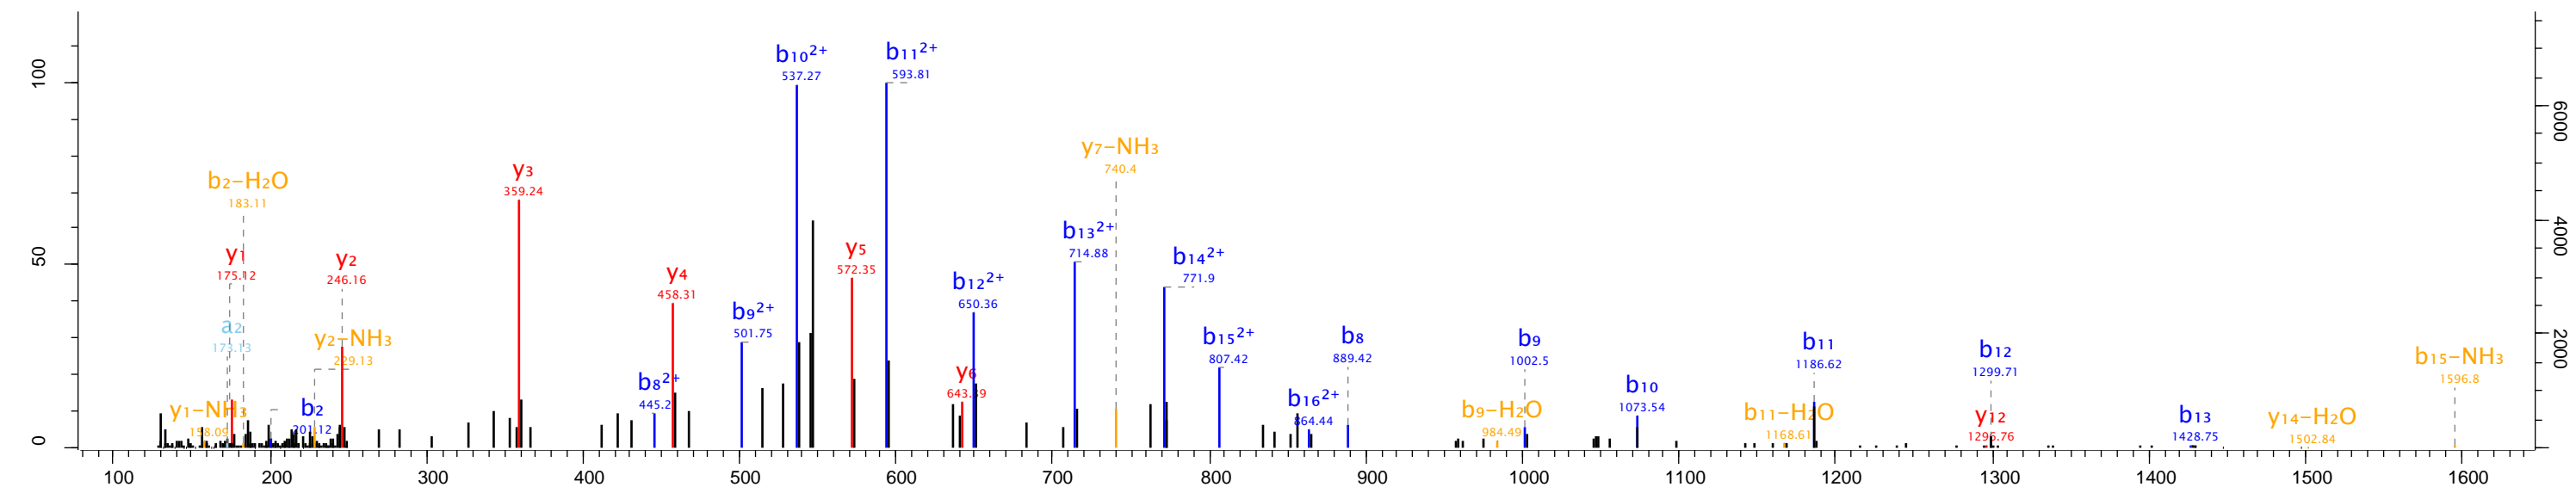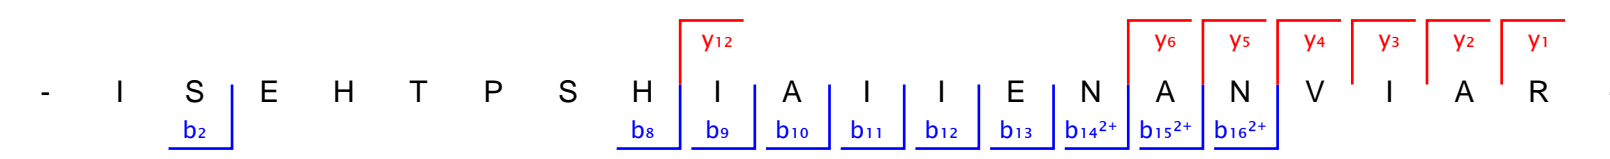

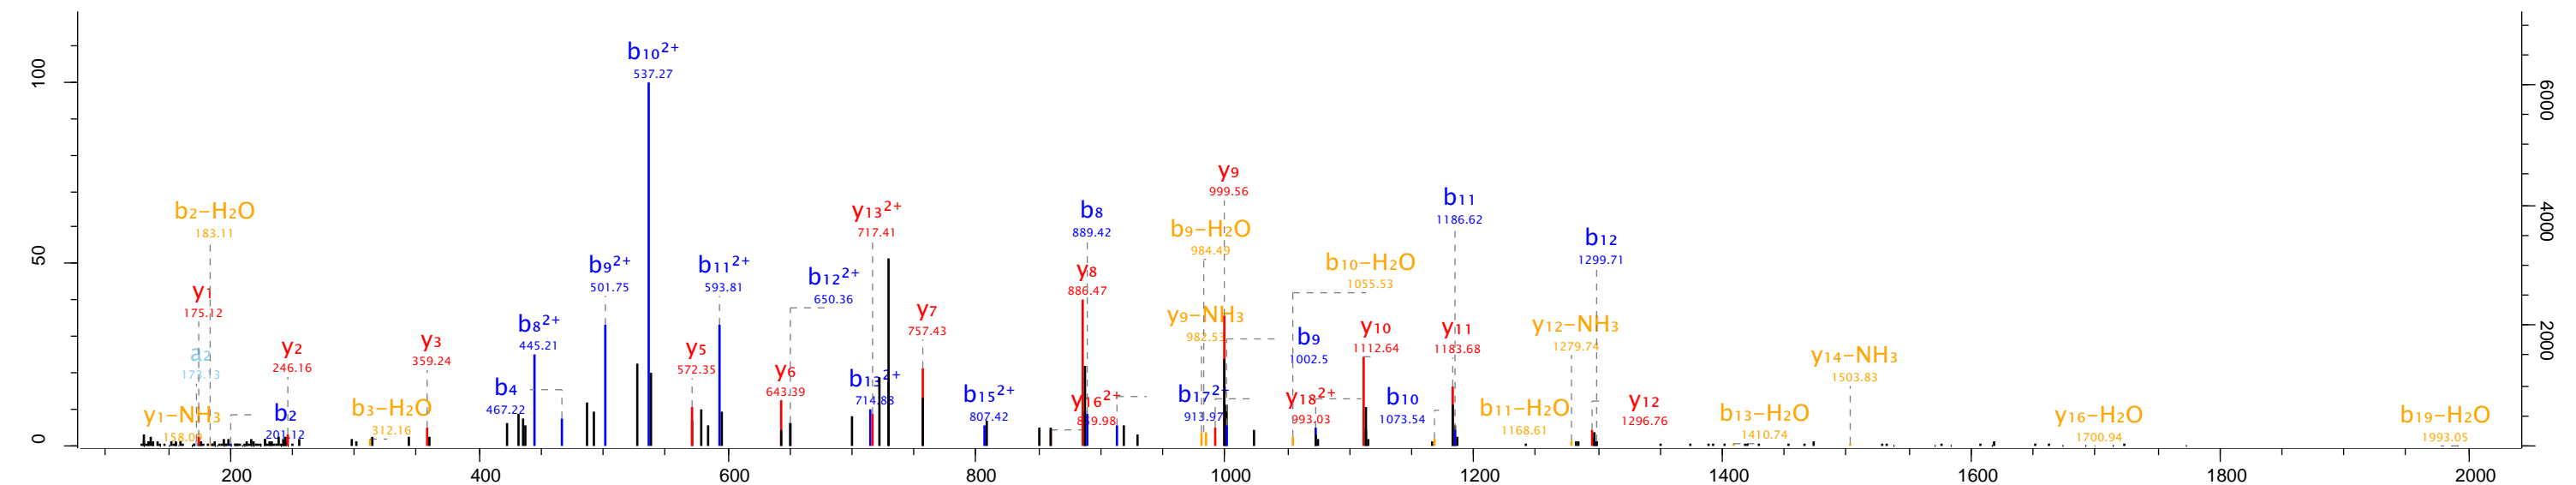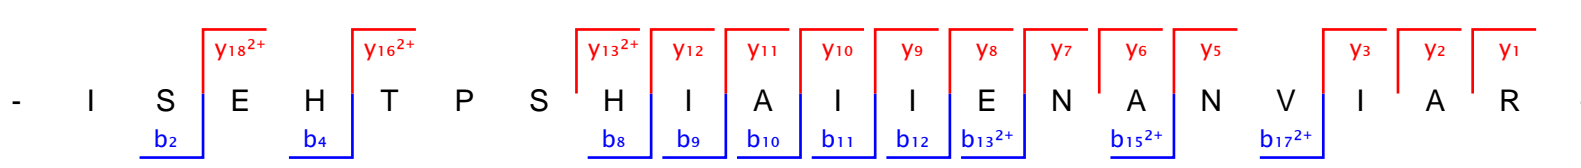

Raw file: 2015-01-05\_CL03\_XenEmb\_x2  
 Scan: 25975 Method: ITMS; HCD Score: 95.66 m/z: 547.3

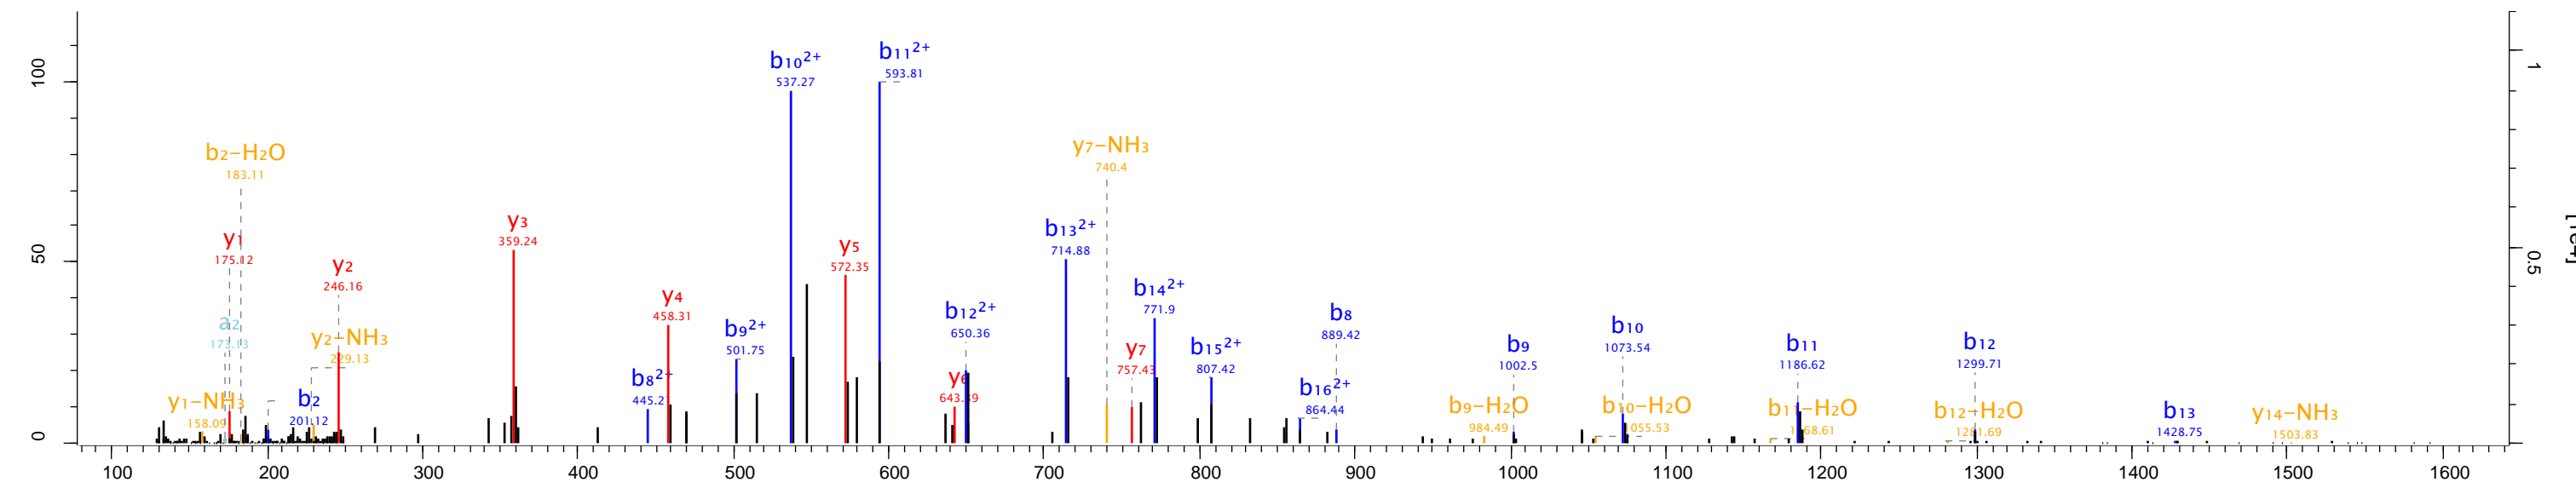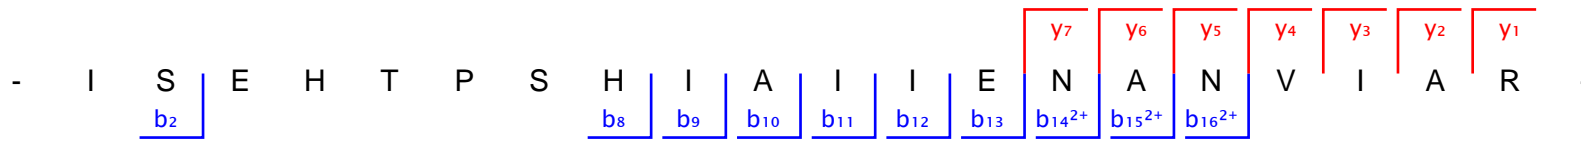

Raw file 2015-01-05\_CL03\_XenEmb\_x2 Scan 25993 Method ITMS; HCD Score 114.21 m/z 729.39

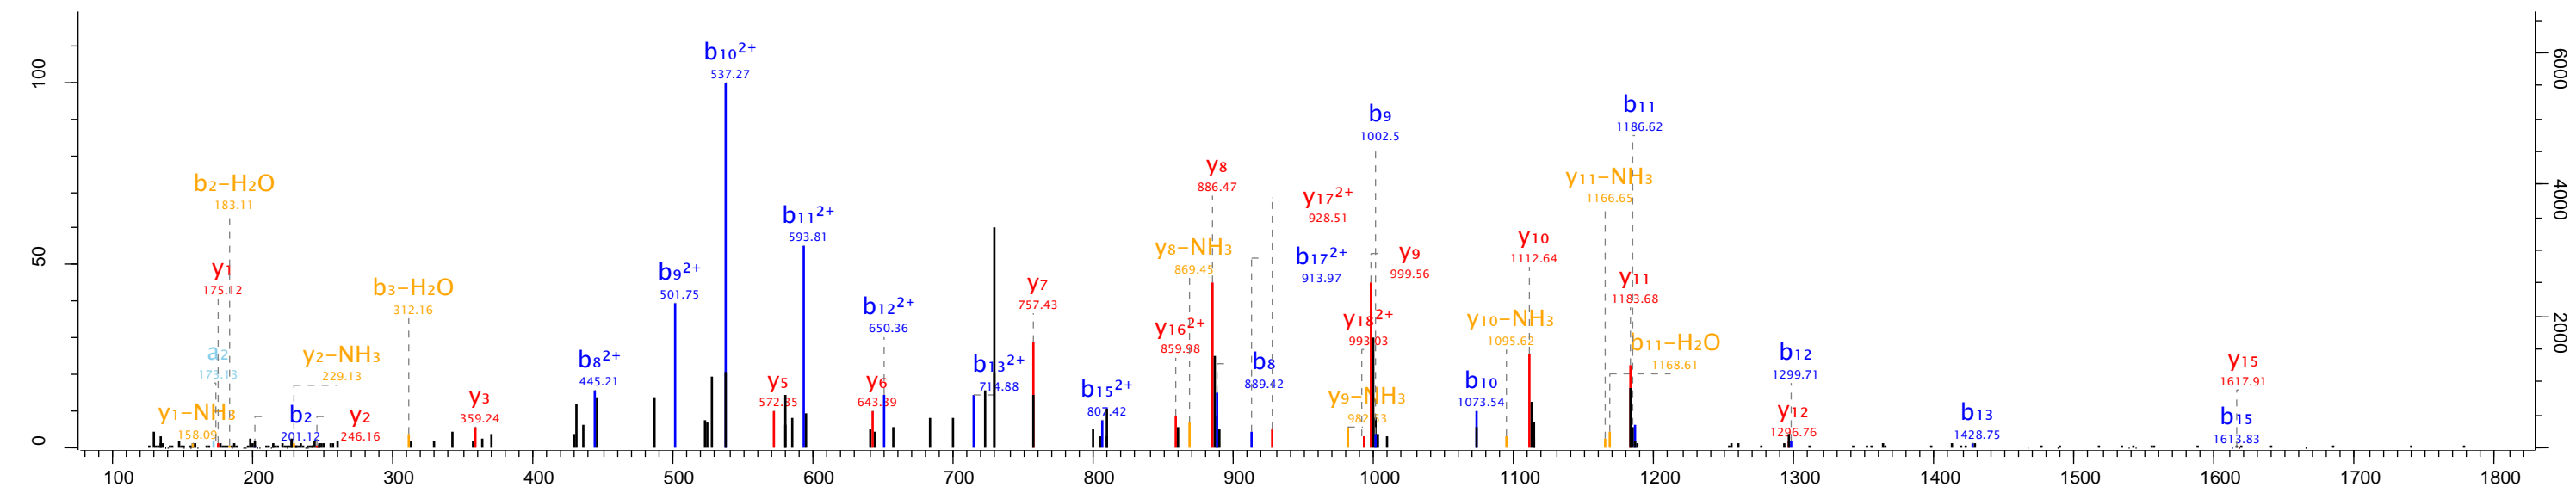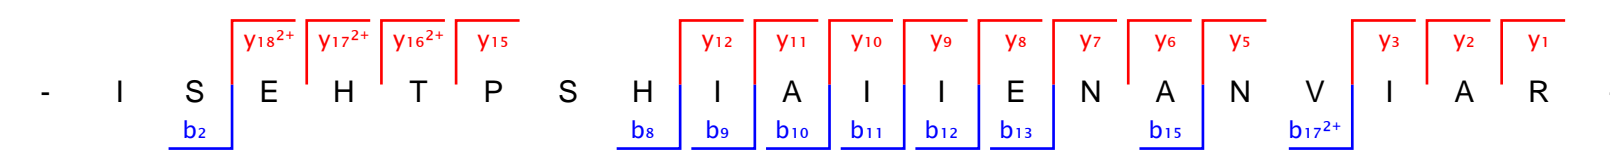



Raw file 2015-01-05\_CL03\_XenEmb\_x2 Scan 25995 Method ITMS; HCD Score 122.96 m/z 547.3

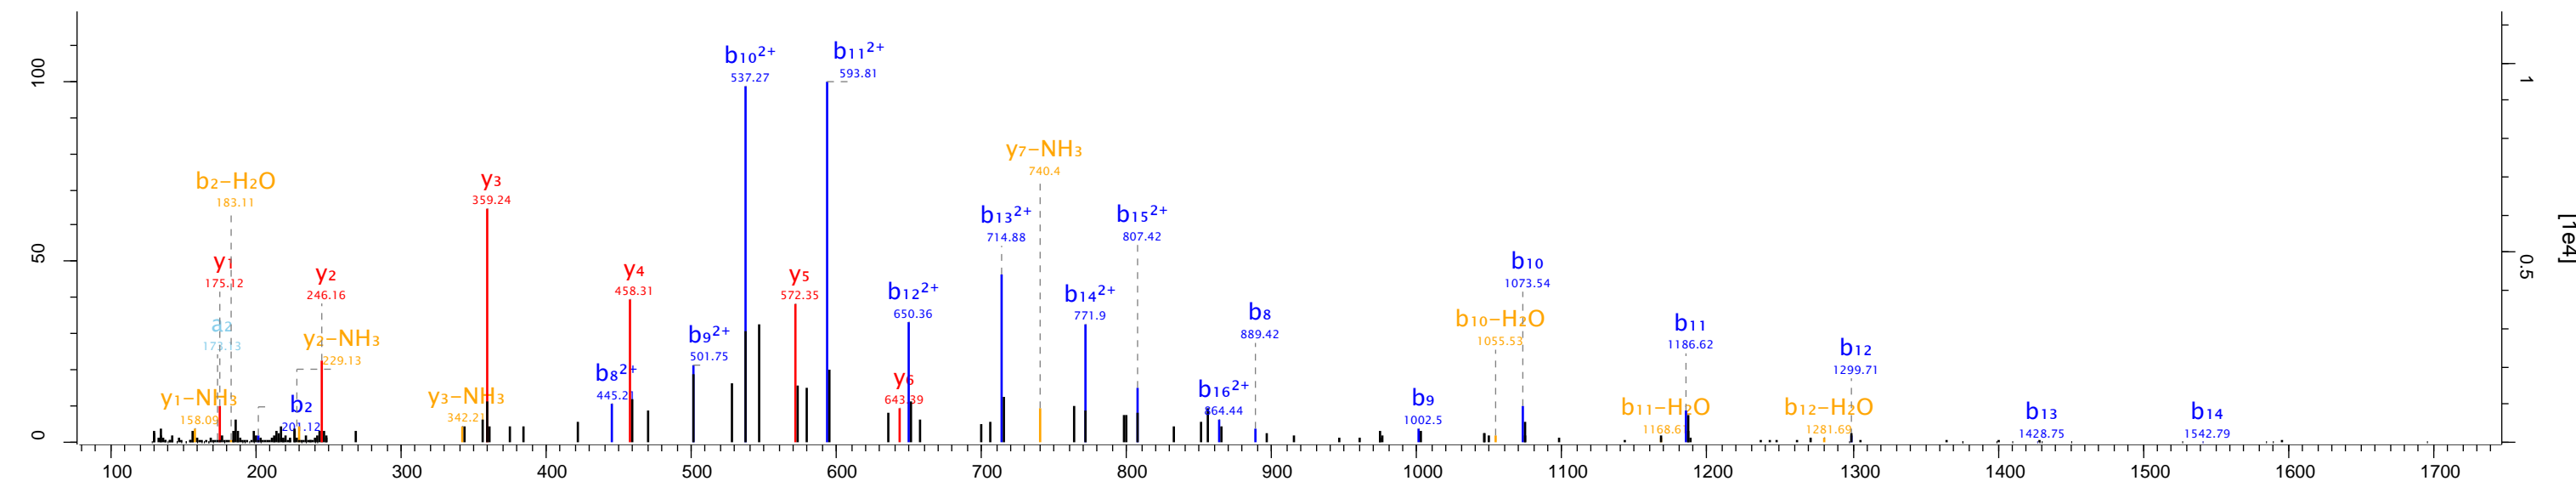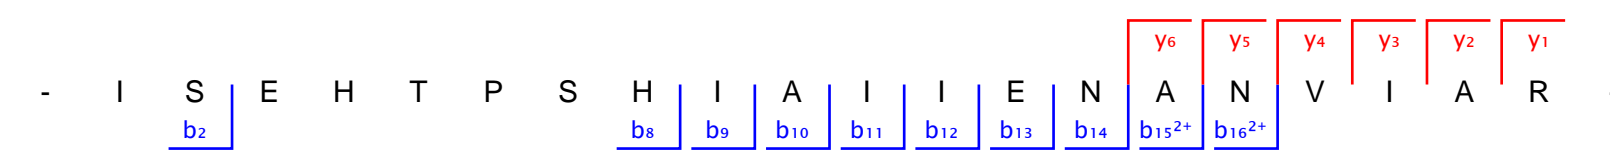

Spectral Annotation for Single-Peptide IDs in 16-cell Embryo using Q-OT-LIT

Raw file 2015-01-05\_CL03\_XenEmb\_x2 Scan 26057 Method ITMS; HCD Score 58.13 m/z 466.92

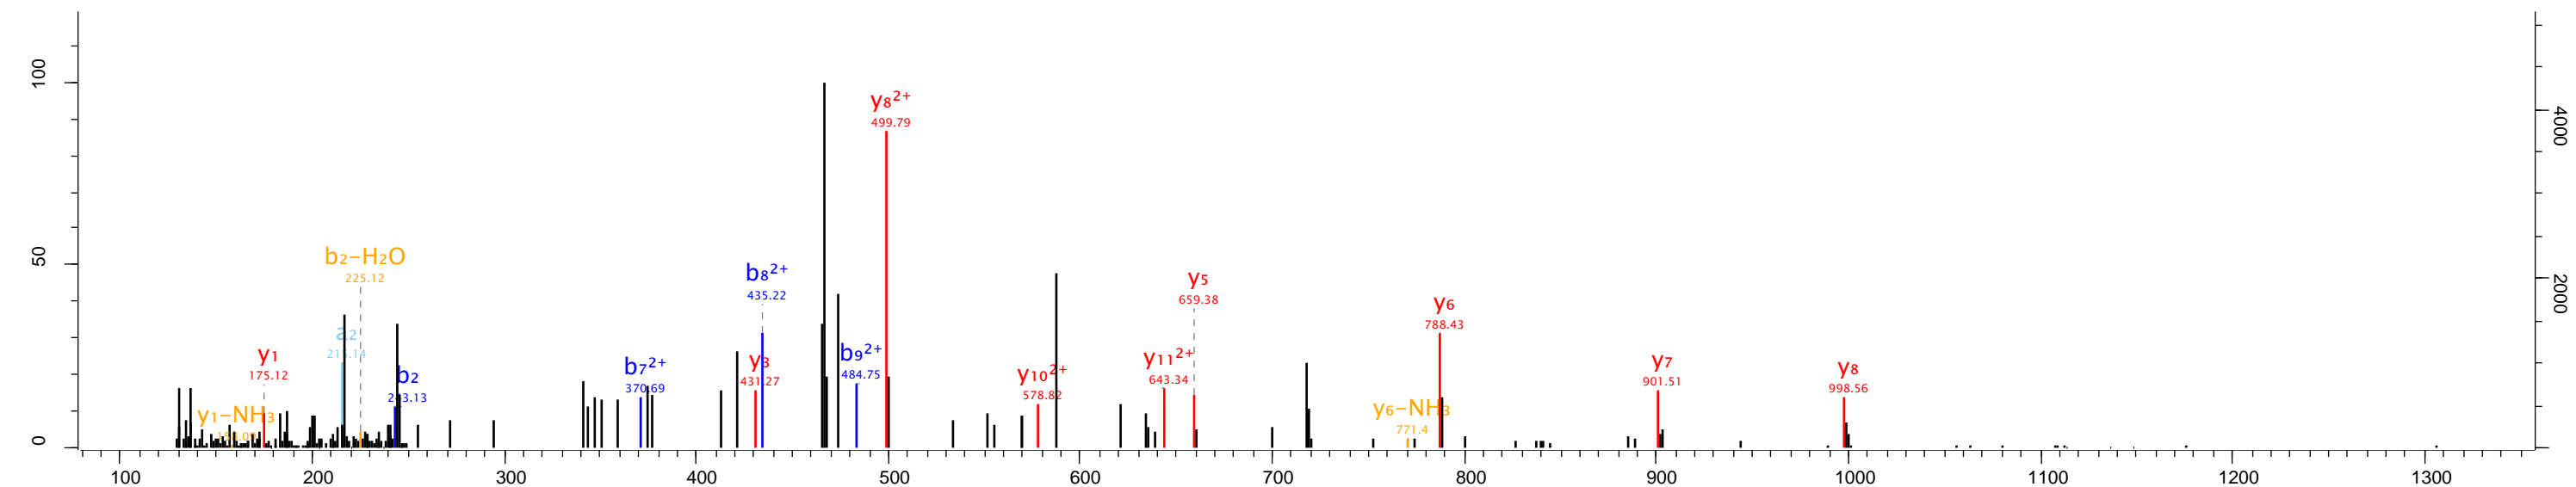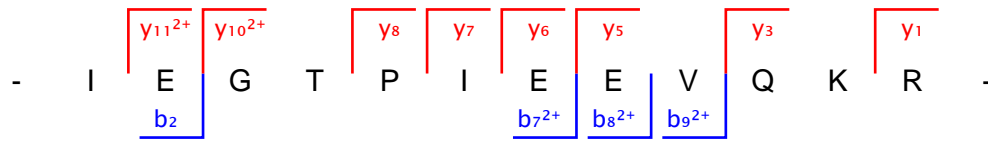

Spectral Annotation for Single-Peptide IDs in 16-cell Embryo using Q-OT-LIT

Raw file 2015-01-05\_CL03\_XenEmb\_x2 Scan 26100 Method ITMS; HCD Score 44.17 m/z 725.4

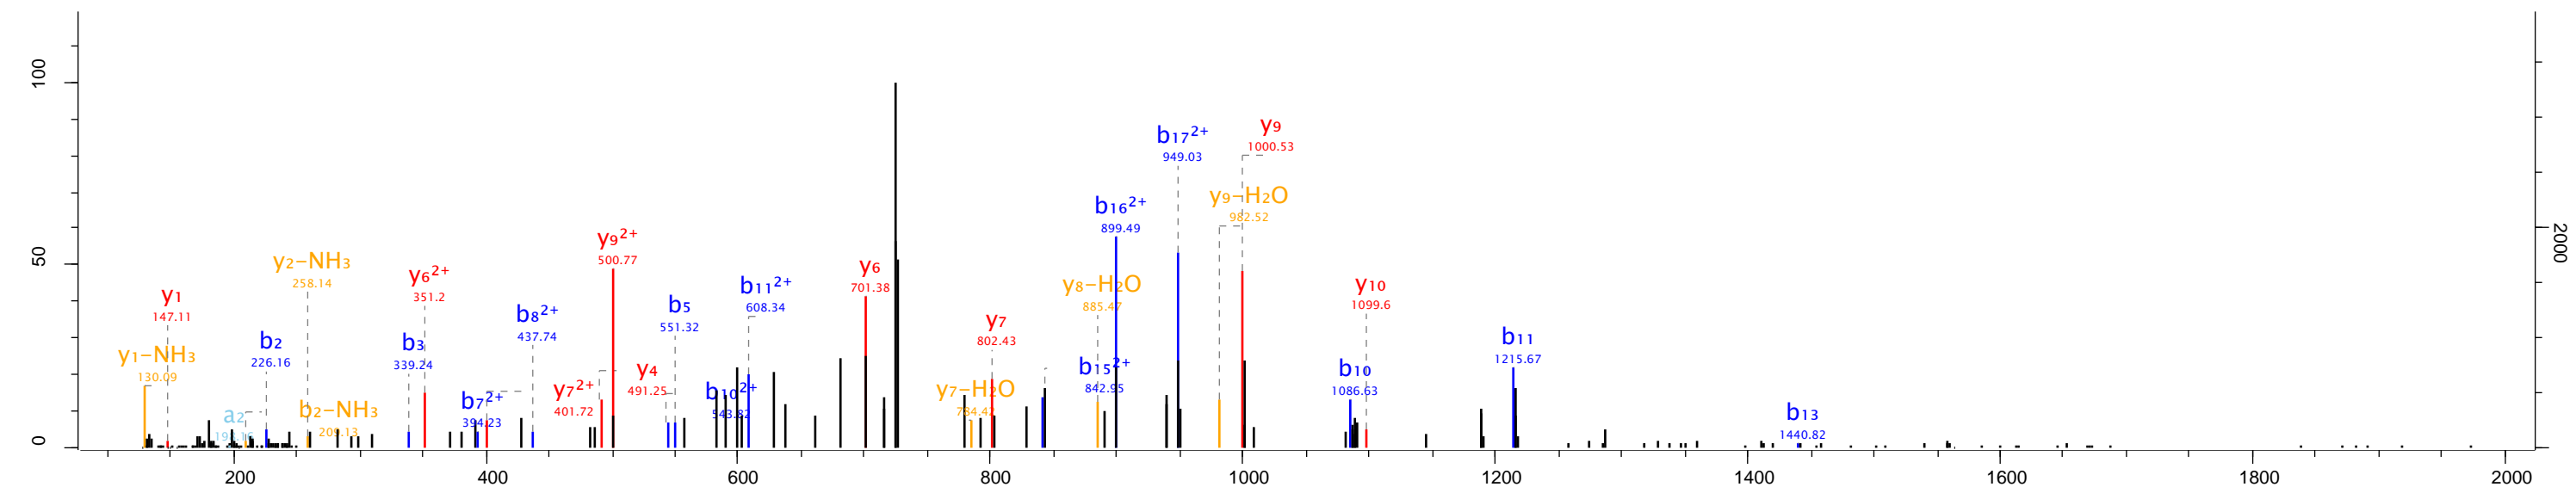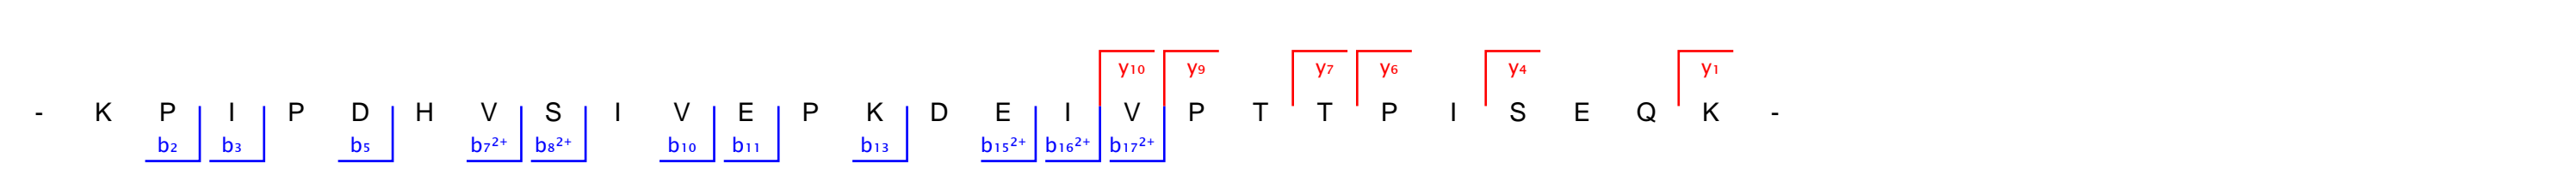

Raw file: 2015-01-05\_CL03\_XenEmb\_x2  
 Scan: 26145 Method: ITMS; HCD Score: 33.67 m/z: 756.01

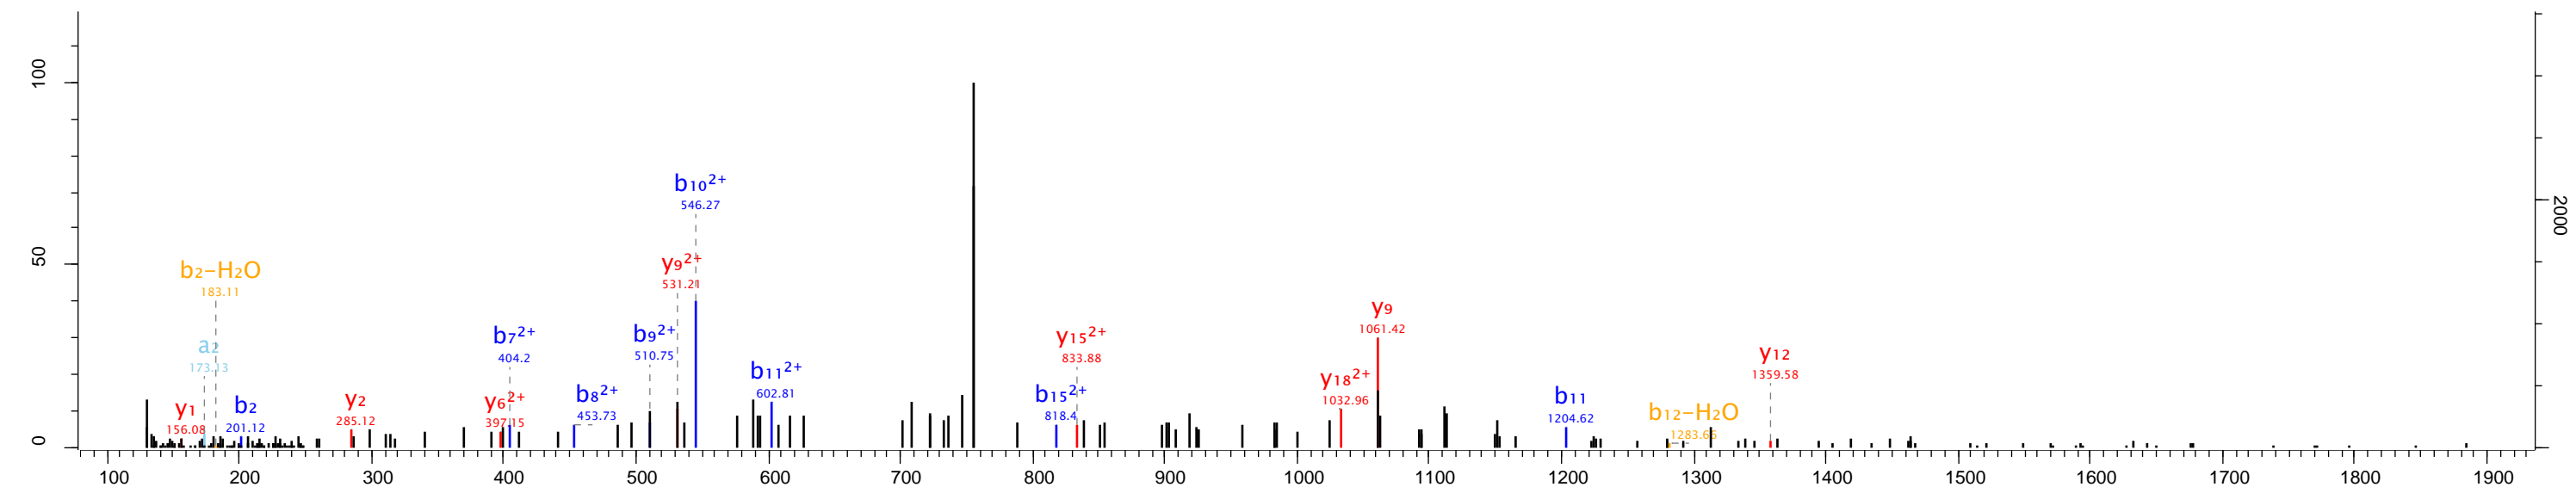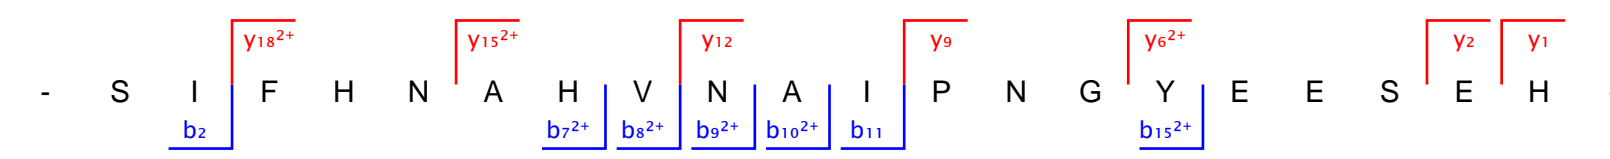

Raw file: 2015-01-05\_CL03\_XenEmb\_x2  
 Scan: 26166 Method: ITMS; HCD Score: 53.52 m/z: 567.01

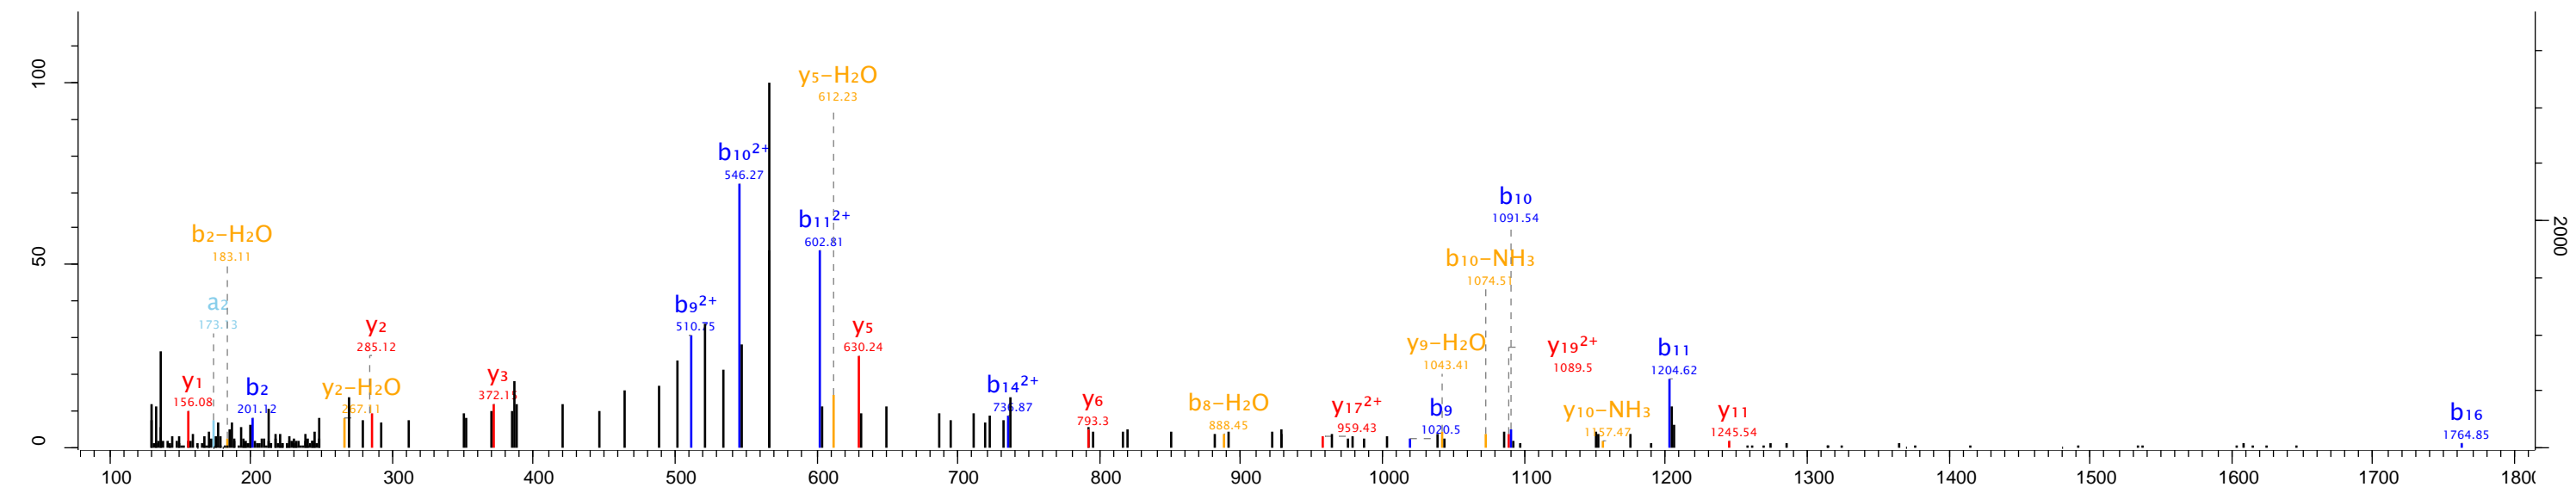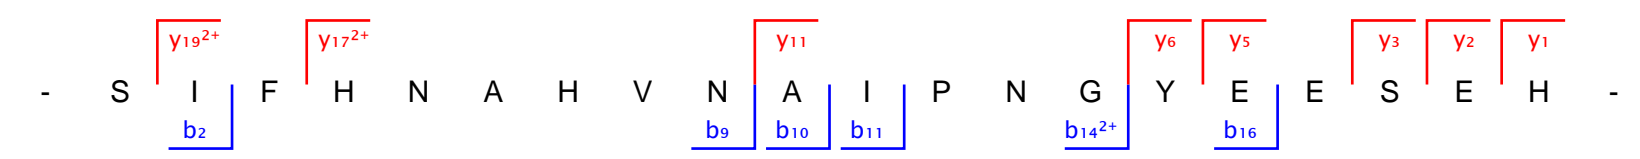

Spectral Annotation for Single-Peptide IDs in 16-cell Embryo using Q-OT-LIT

Raw file: 2015-01-05\_CL03\_XenEmb\_x2  
 Scan: 26256 Method: ITMS; HCD Score: 133.42 m/z: 489.6

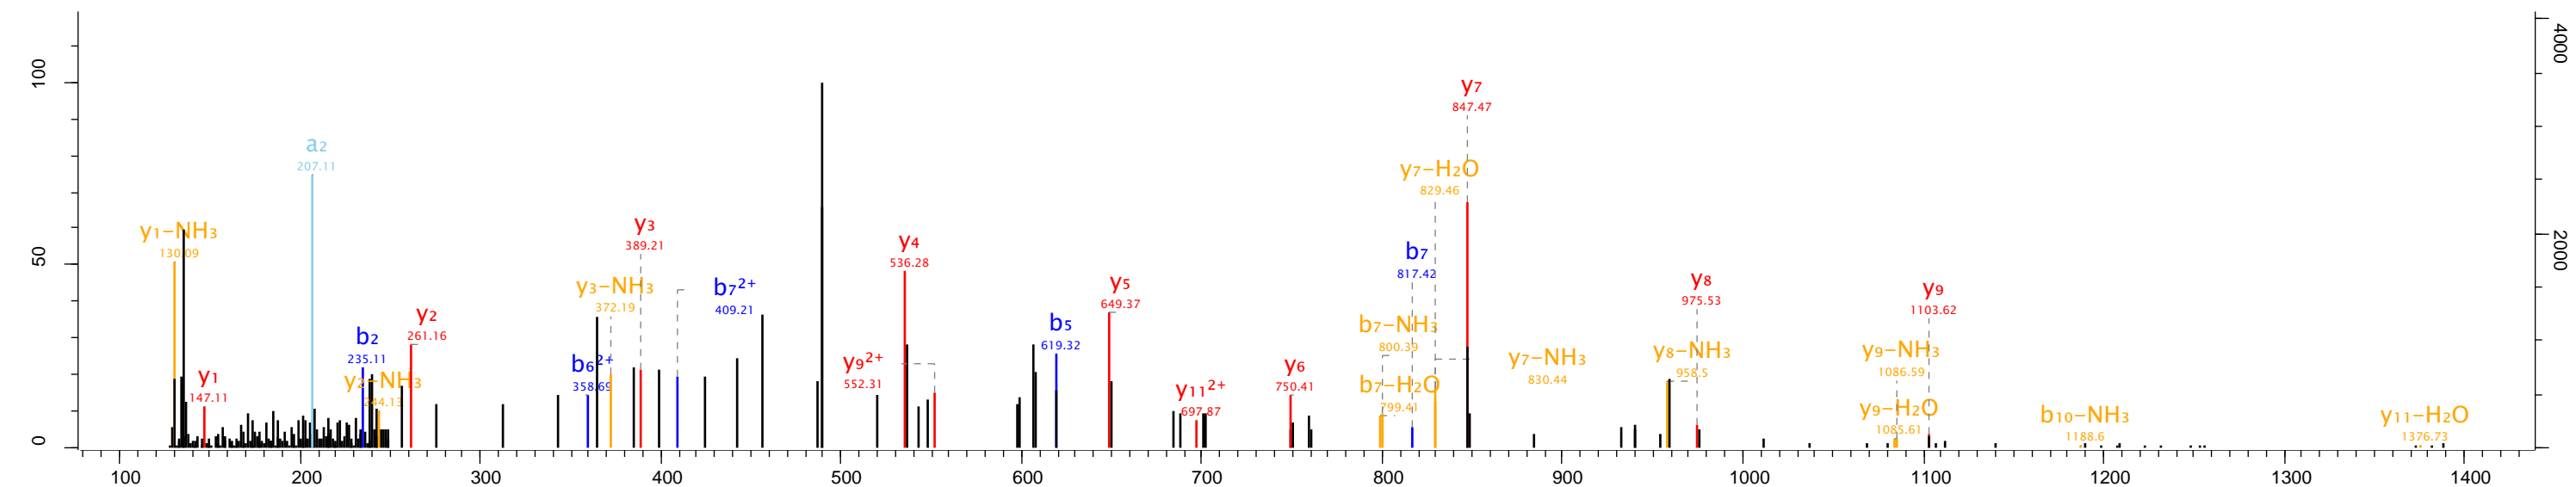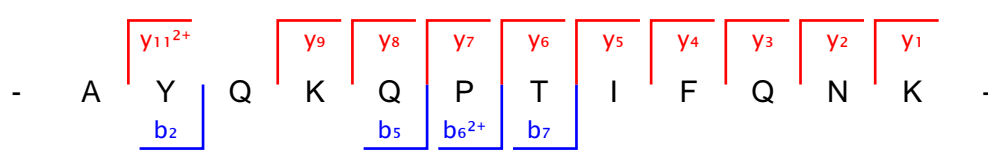

Spectral Annotation for Single-Peptide IDs in 16-cell Embryo using Q-OT-LIT

Raw file: 2015-01-05\_CL03\_XenEmb\_x2  
 Scan: 26285 Method: ITMS; HCD Score: 42.63 m/z: 756.01

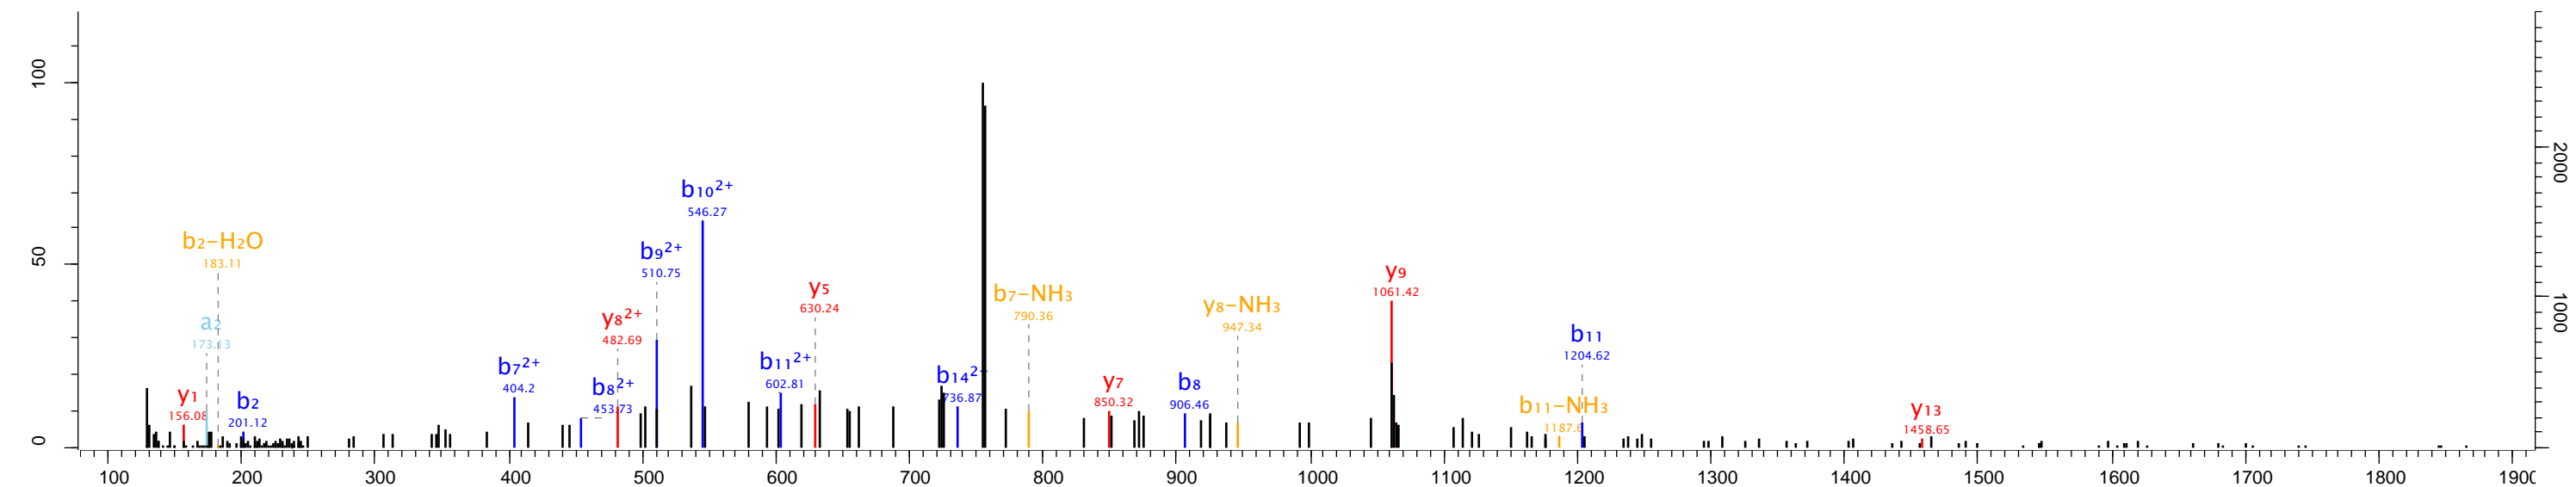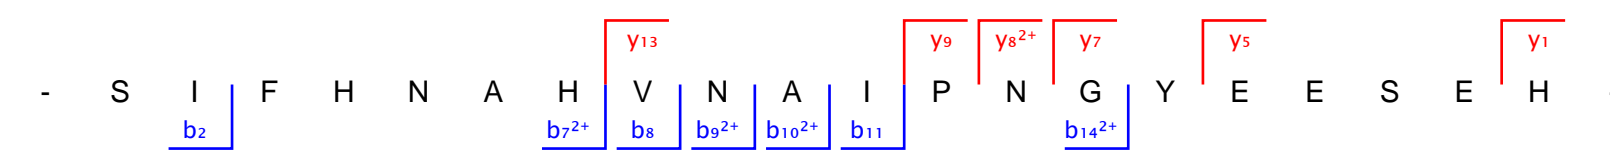

Raw file: 2015-01-05\_CL03\_XenEmb\_x2  
 Scan: 26296 Method: ITMS; HCD Score: 53.87 m/z: 475.57

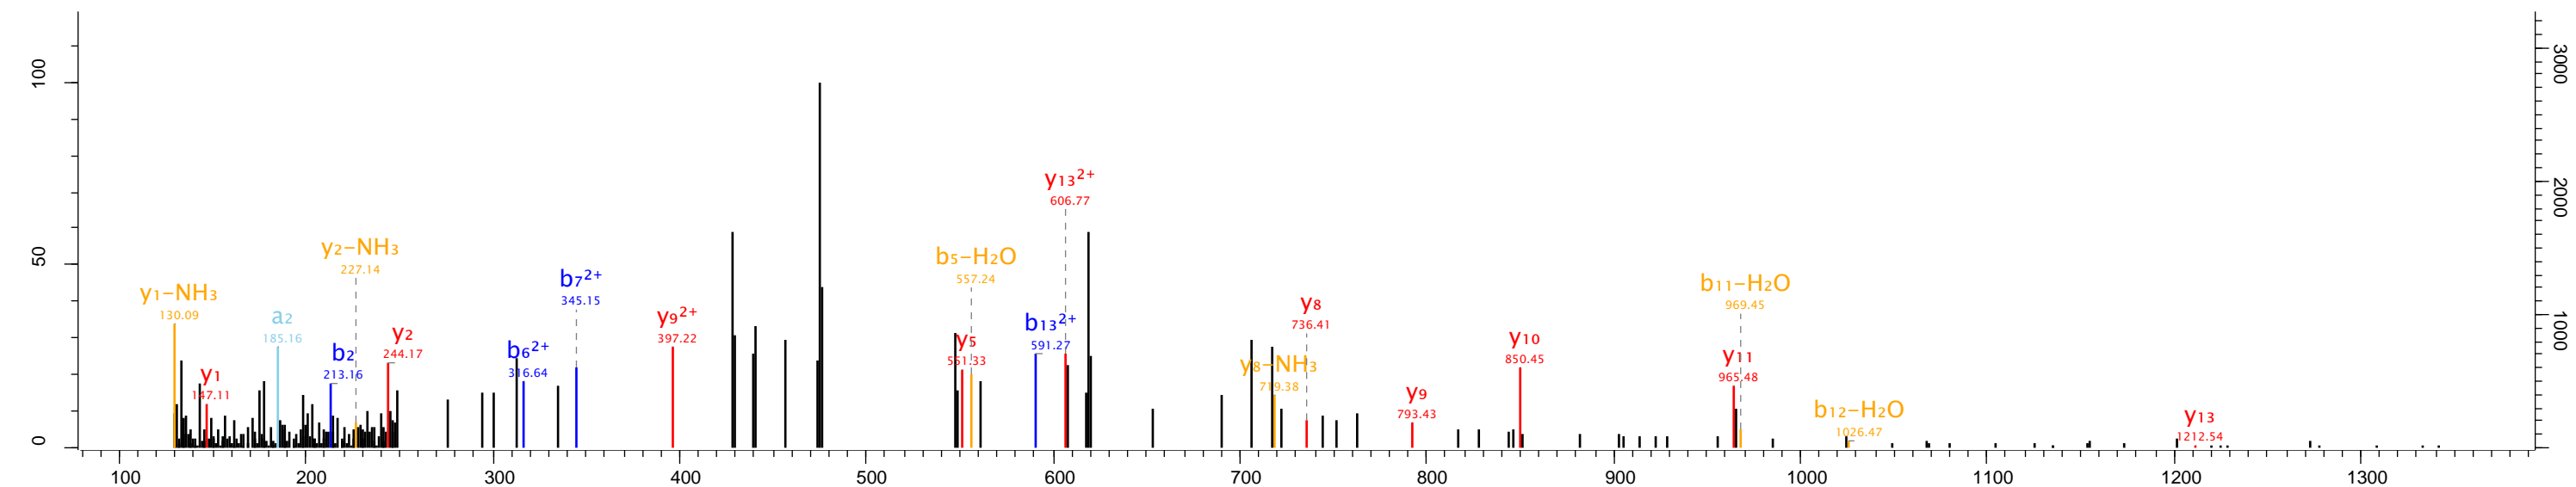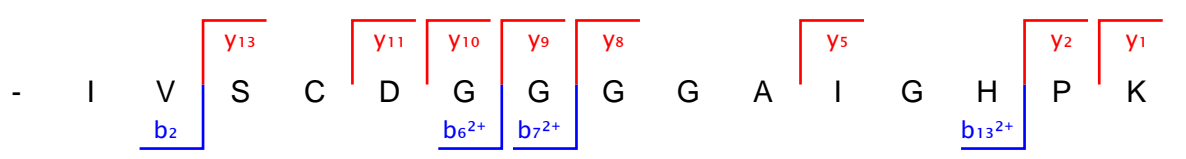



Raw file: 2015-01-05\_CL03\_XenEmb\_x2  
 Scan: 26377 Method: ITMS; HCD Score: 44.17 m/z: 725.4

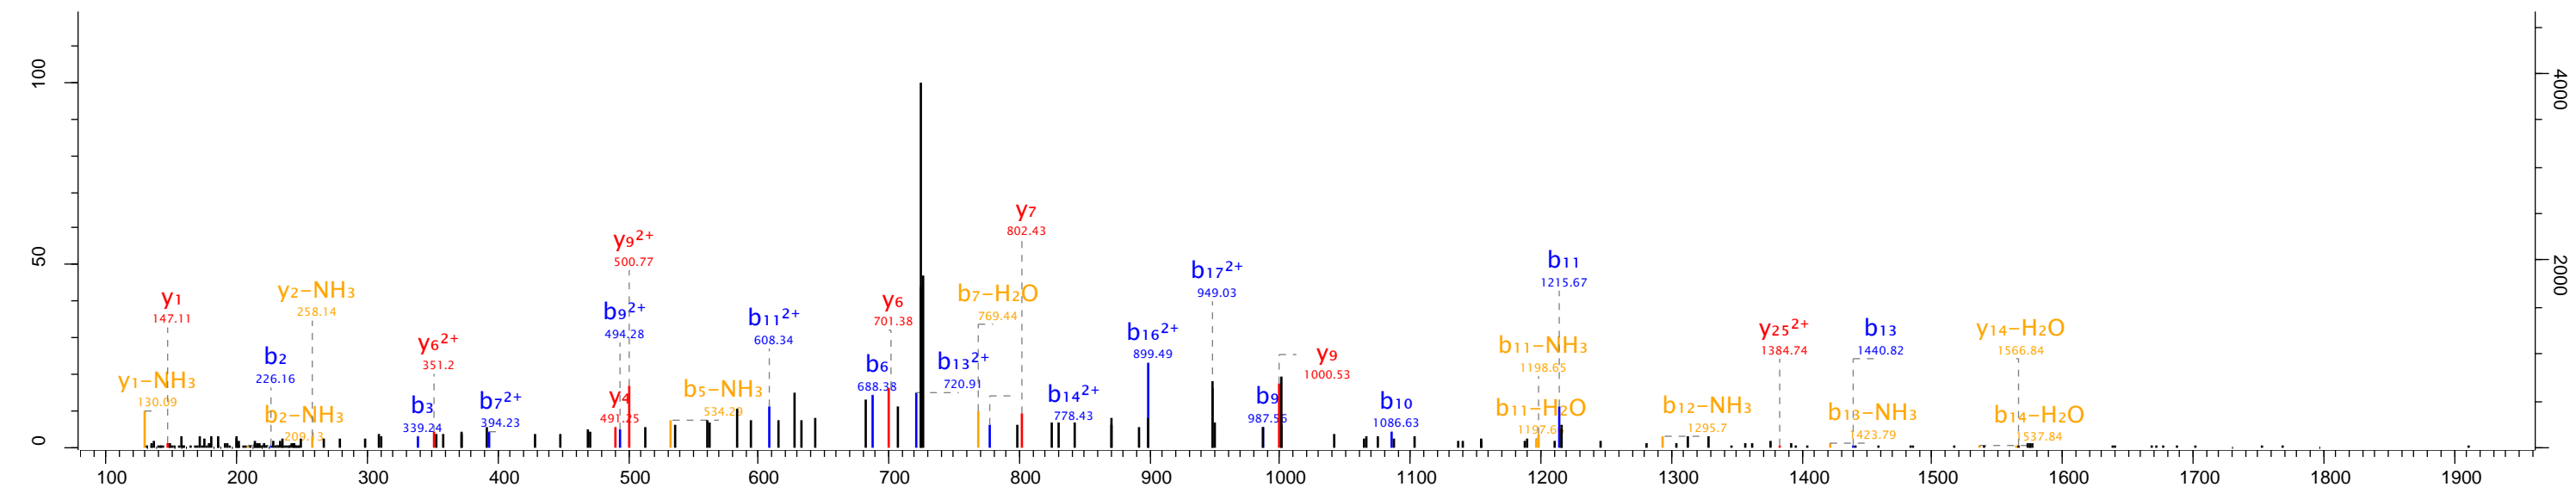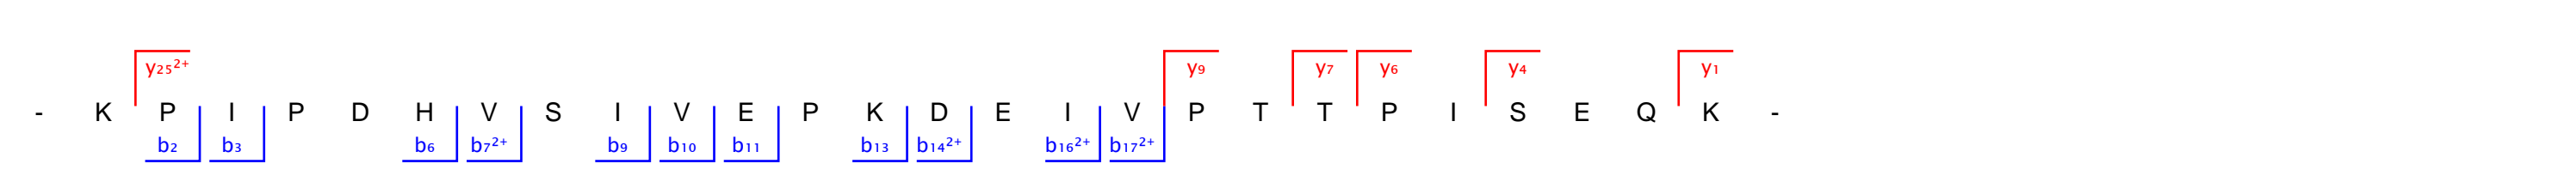

Raw file 2015-01-05\_CL03\_XenEmb\_x2 Scan 26488 Method ITMS; HCD Score 54.81 m/z 519.64

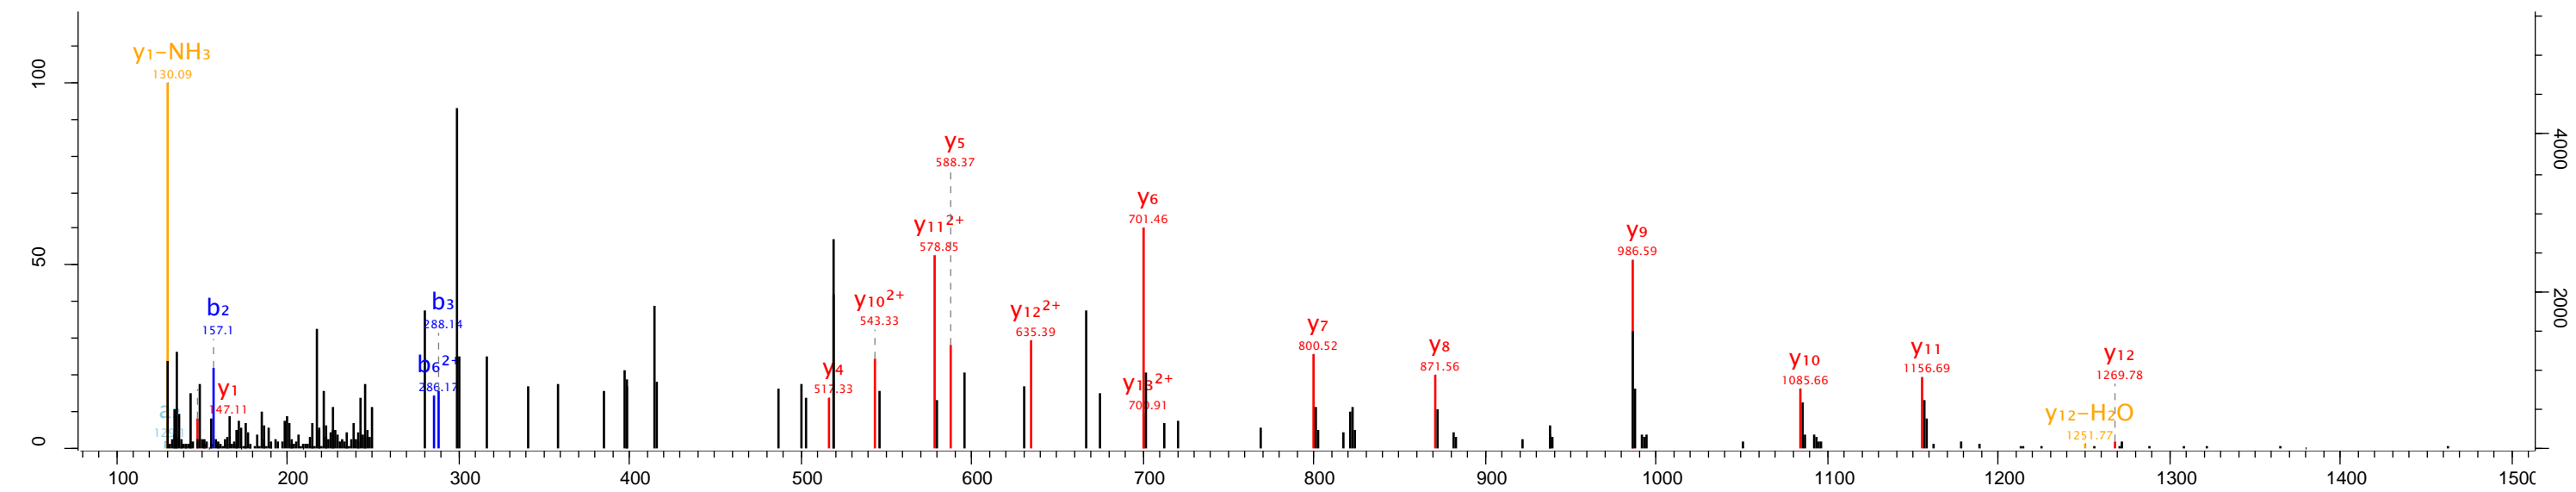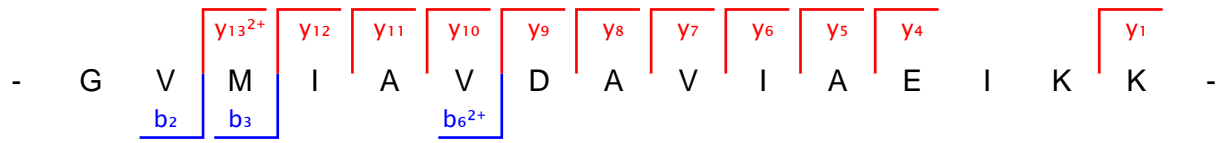

Raw file 2015-01-05\_CL03\_XenEmb\_x2 Scan 26504 Method ITMS; HCD Score 47.51 m/z 519.64

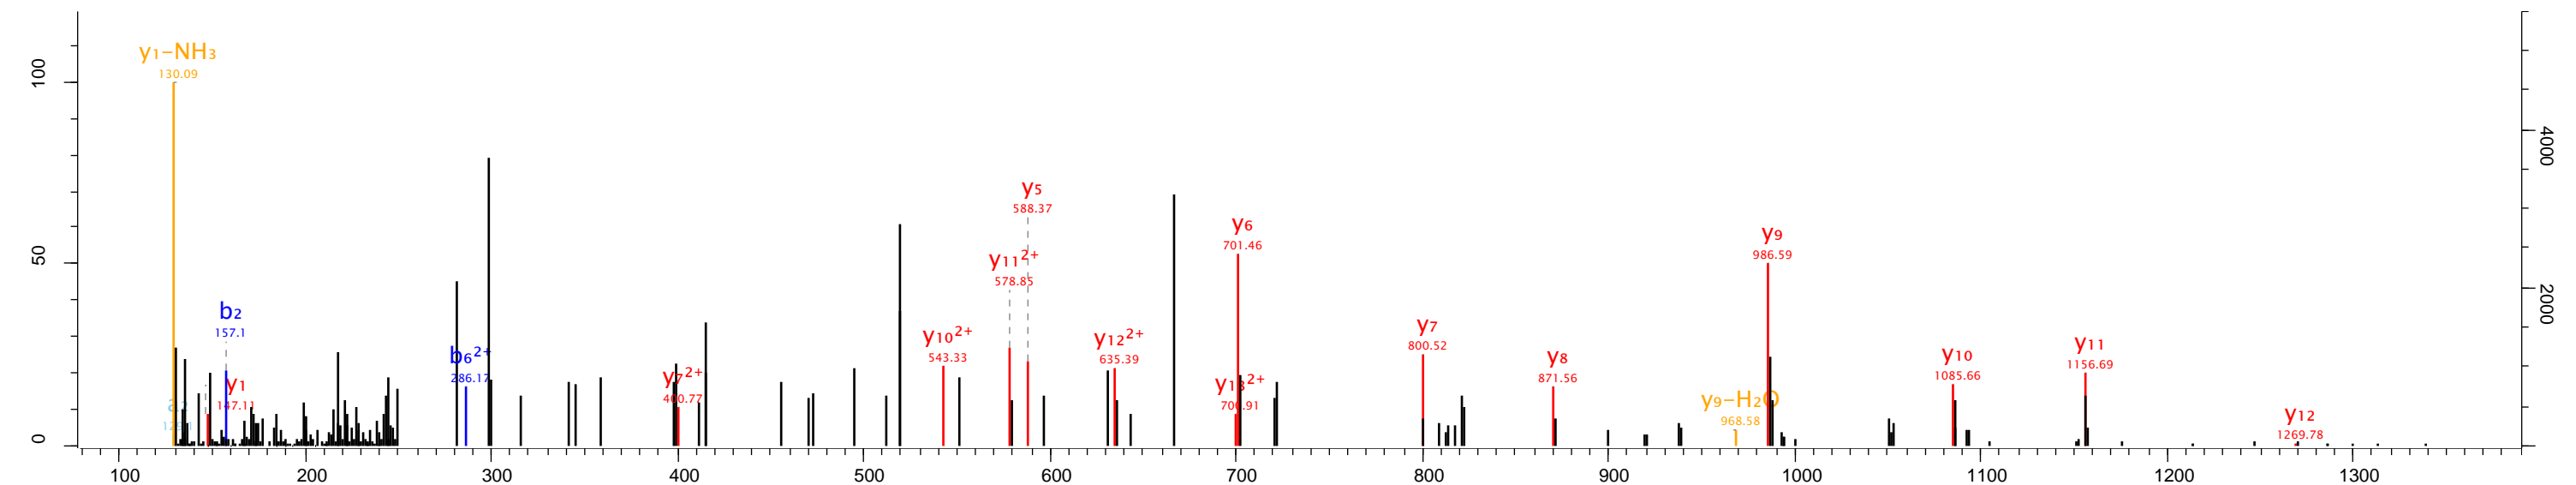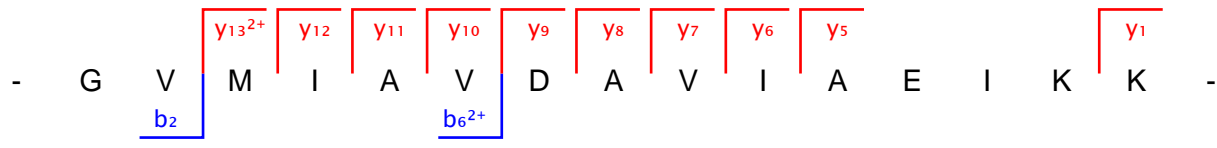

Raw file: 2015-01-05\_CL03\_XenEmb\_x2  
 Scan: 26545 Method: ITMS; HCD Score: 60.32 m/z: 792.06

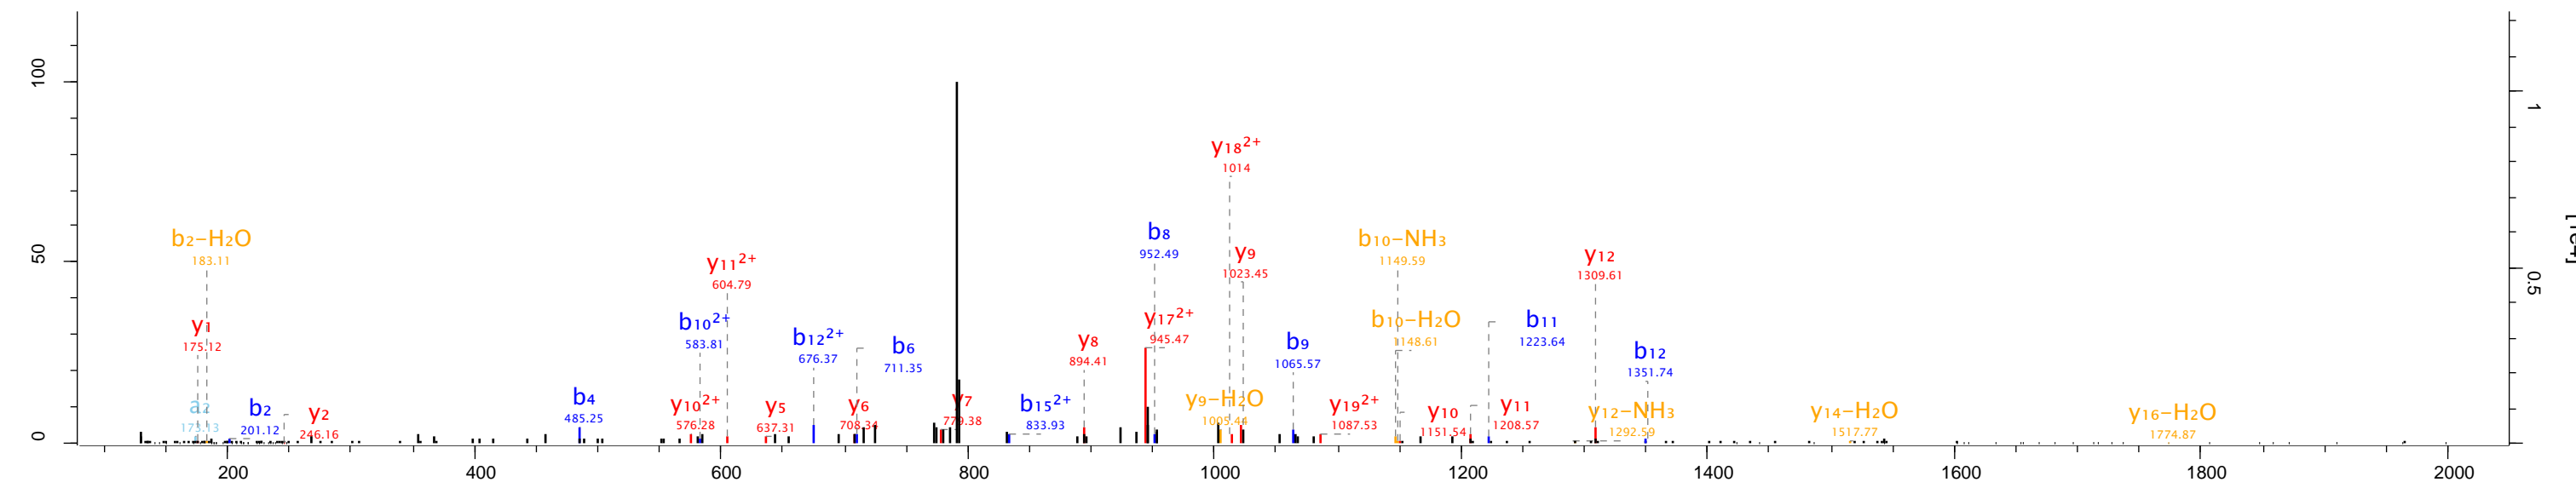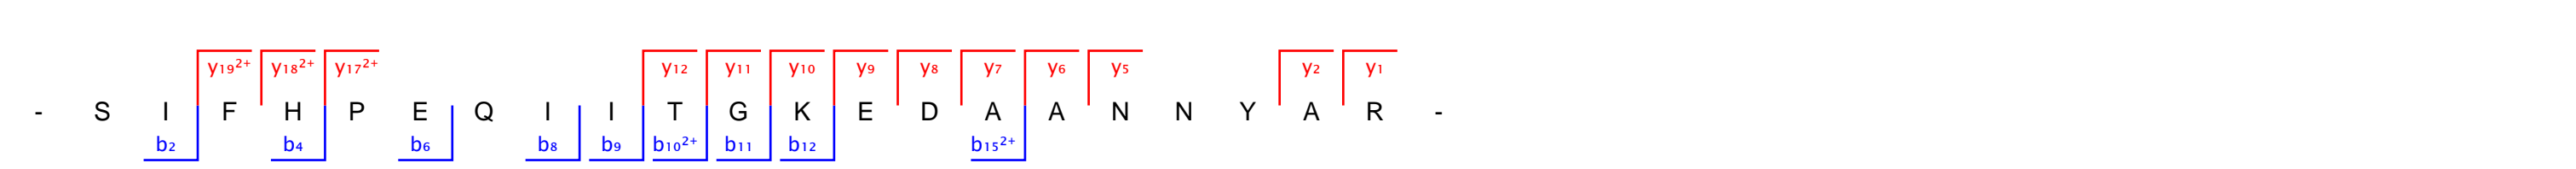

Raw file Scan Method Score m/z  
 2015-01-05\_CL03\_XenEmb\_x2 26547 ITMS; HCD 127.67 594.3

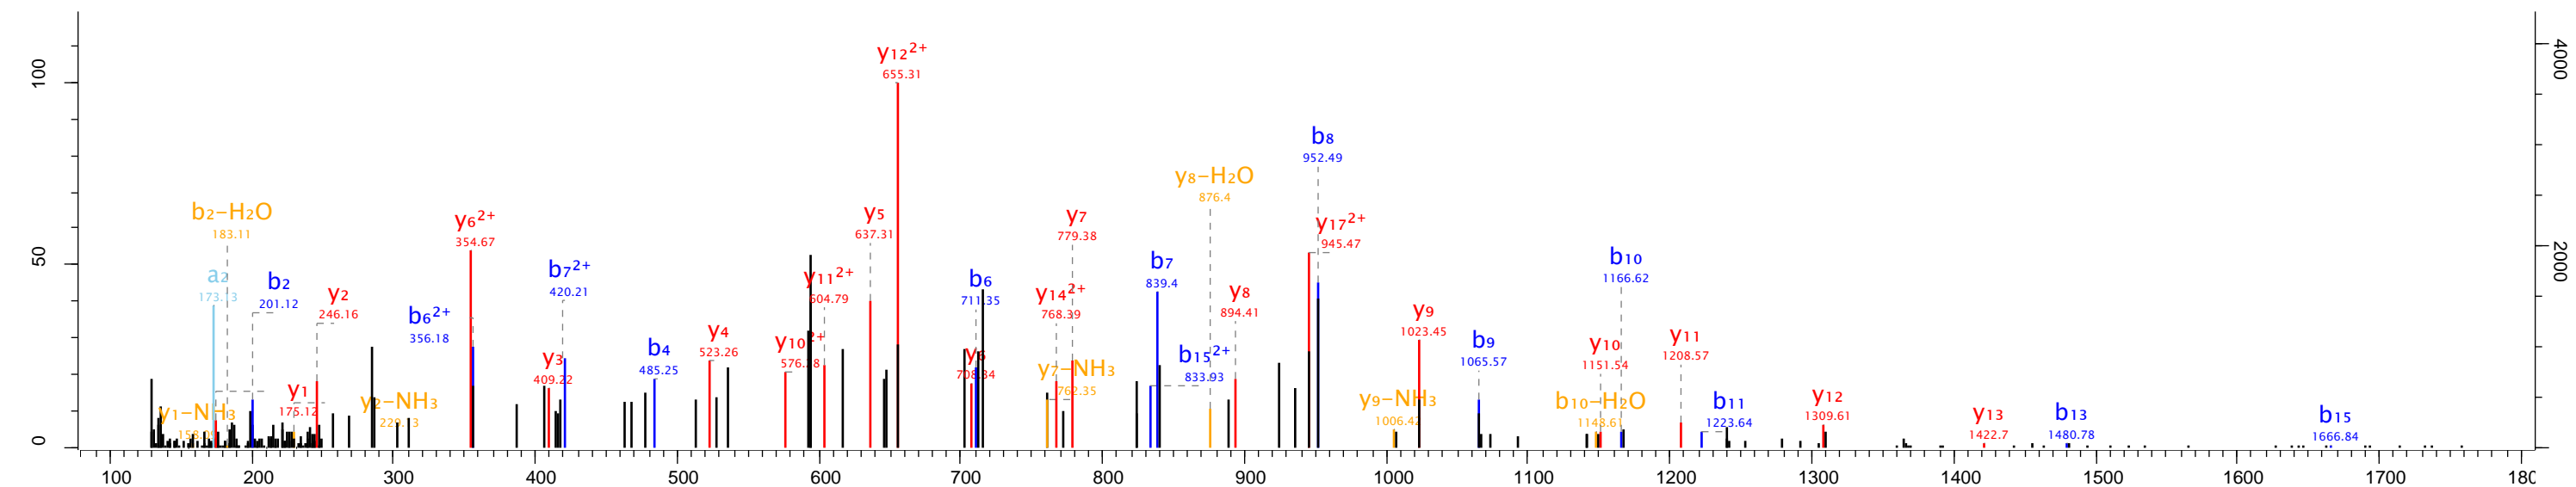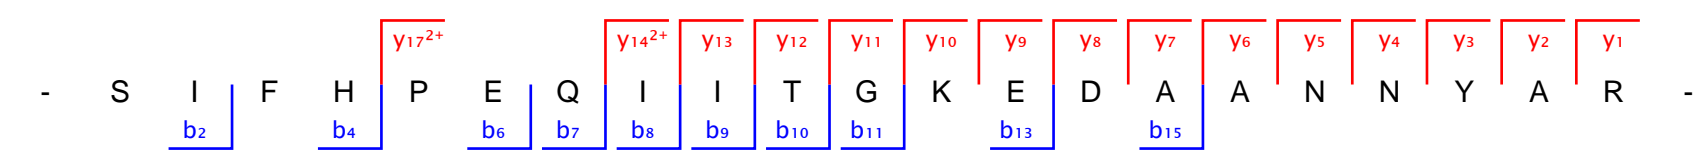

Spectral Annotation for Single-Peptide IDs in 16-cell Embryo using Q-OT-LIT

Raw file: 2015-01-05\_CL03\_XenEmb\_x2  
 Scan: 26568 Method: ITMS; HCD Score: 126.04 m/z: 594.3

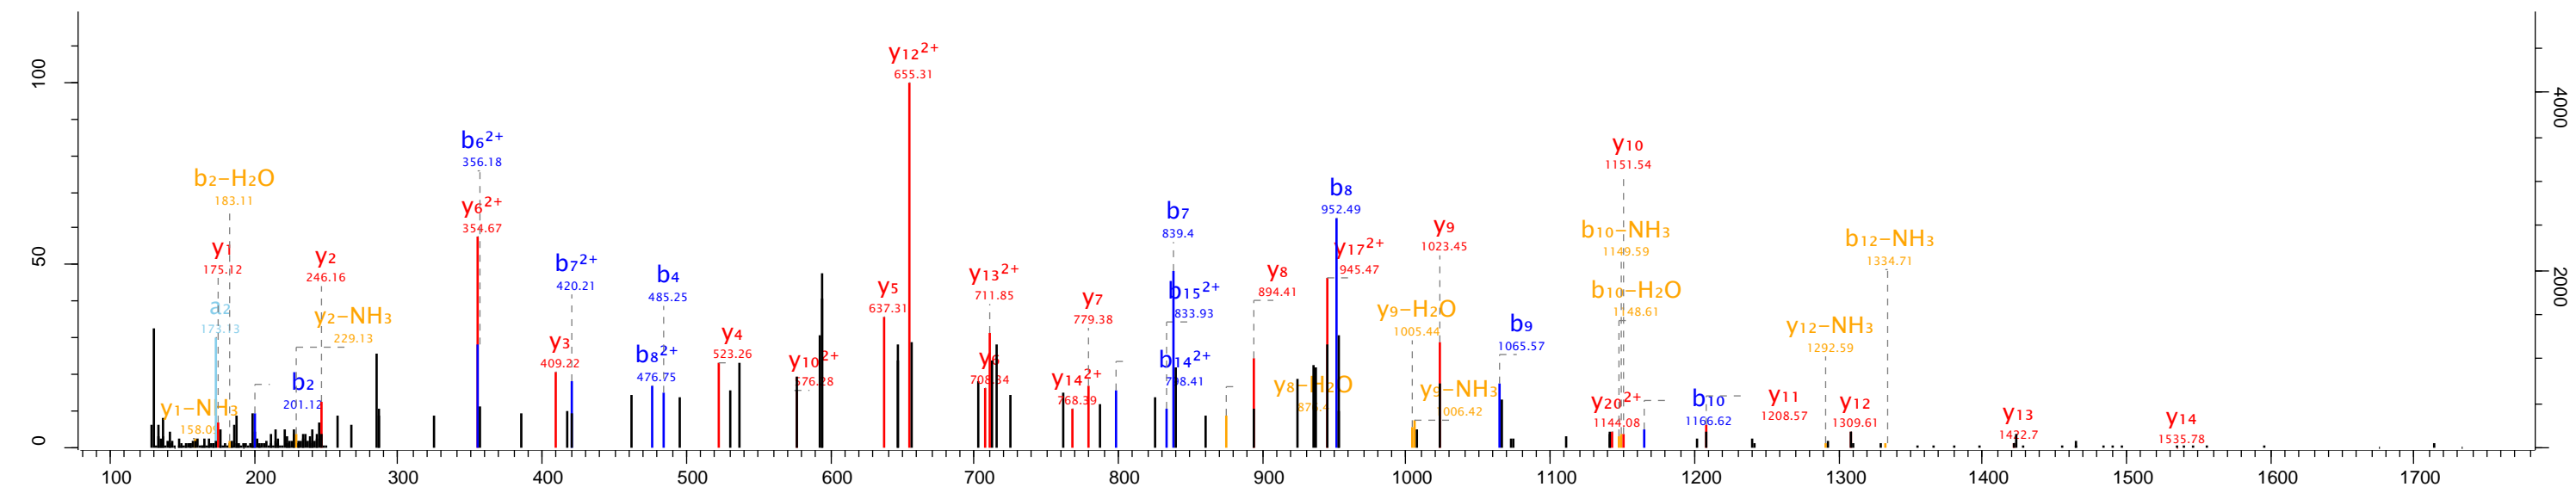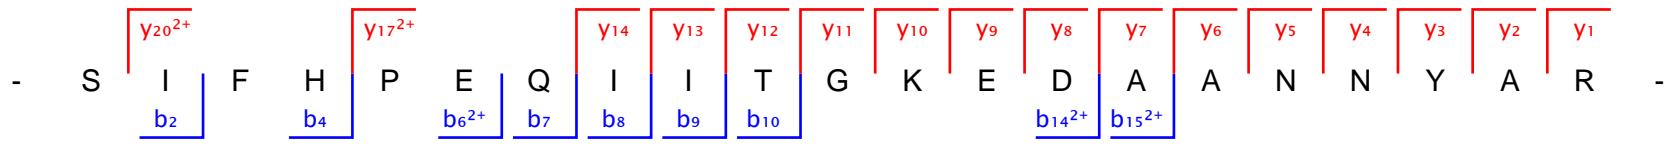

Spectral Annotation for Single-Peptide IDs in 16-cell Embryo using Q-OT-LIT

Raw file: 2015-01-05\_CL03\_XenEmb\_x2  
 Scan: 26585 Method: ITMS; HCD Score: 72.09 m/z: 792.4

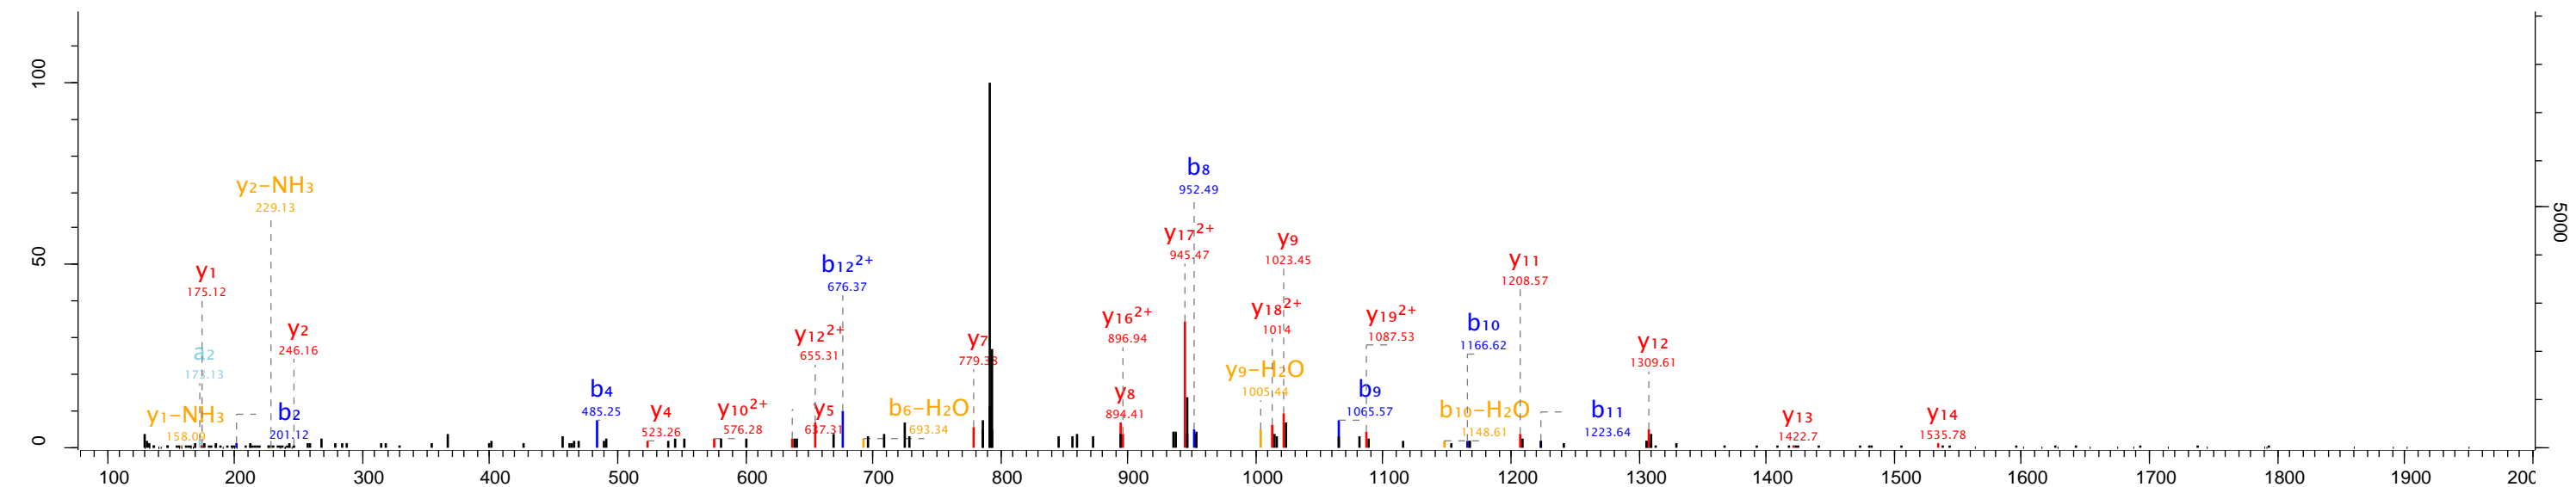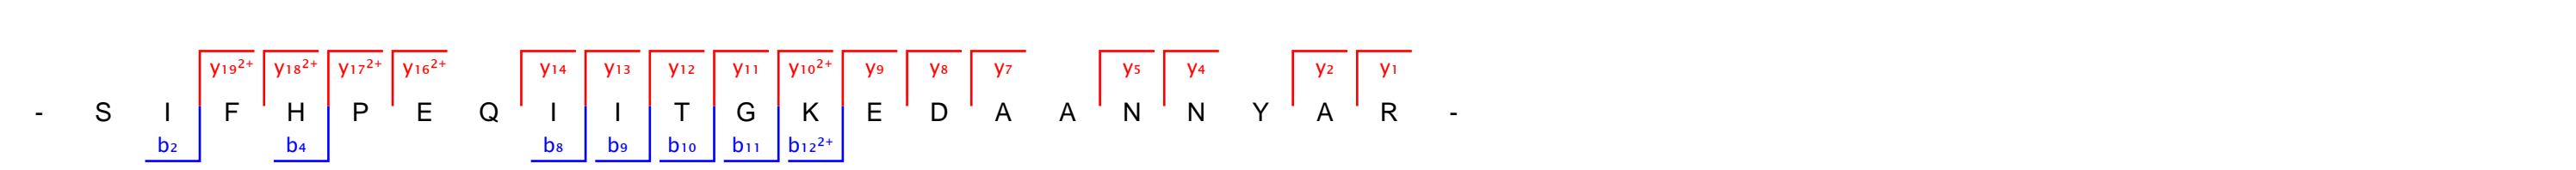

Raw file 2015-01-05\_CL03\_XenEmb\_x2 Scan 26588 Method ITMS; HCD Score 135.36 m/z 594.55

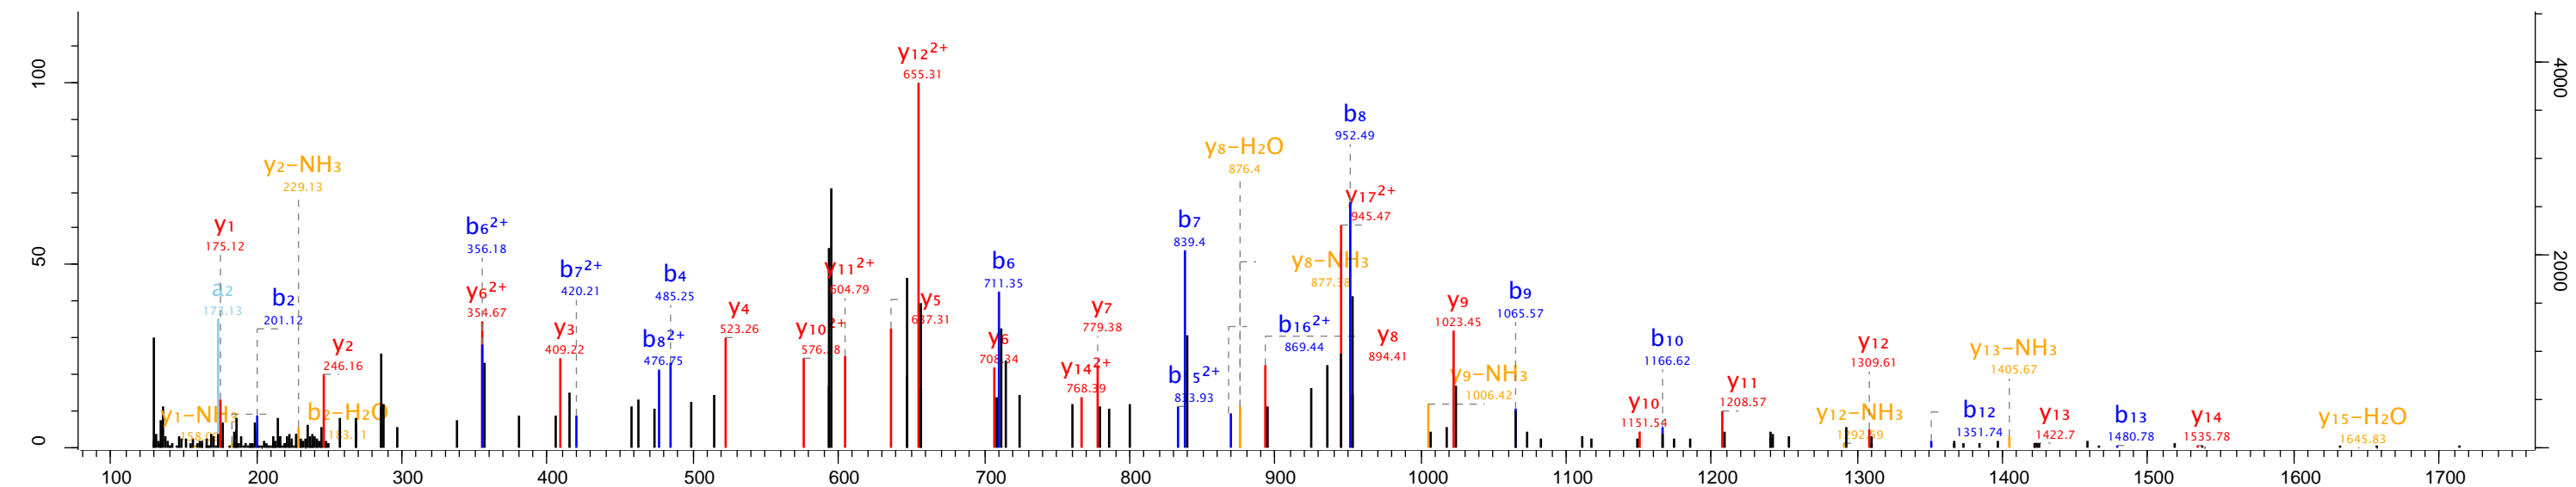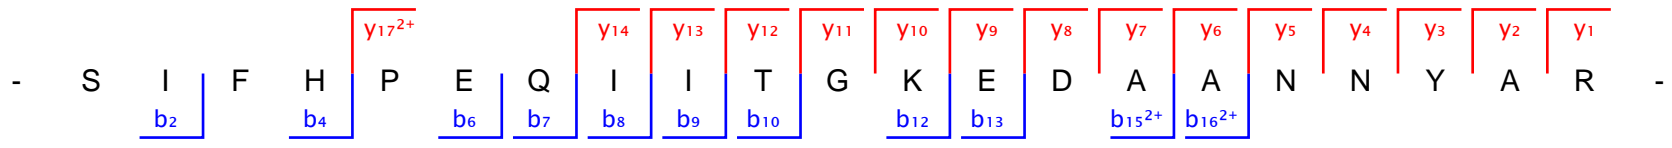

Spectral Annotation for Single-Peptide IDs in 16-cell Embryo using Q-OT-LIT



Raw file: 2015-01-05\_CL03\_XenEmb\_x2  
 Scan: 26604 Method: ITMS; HCD Score: 98.18 m/z: 792.4

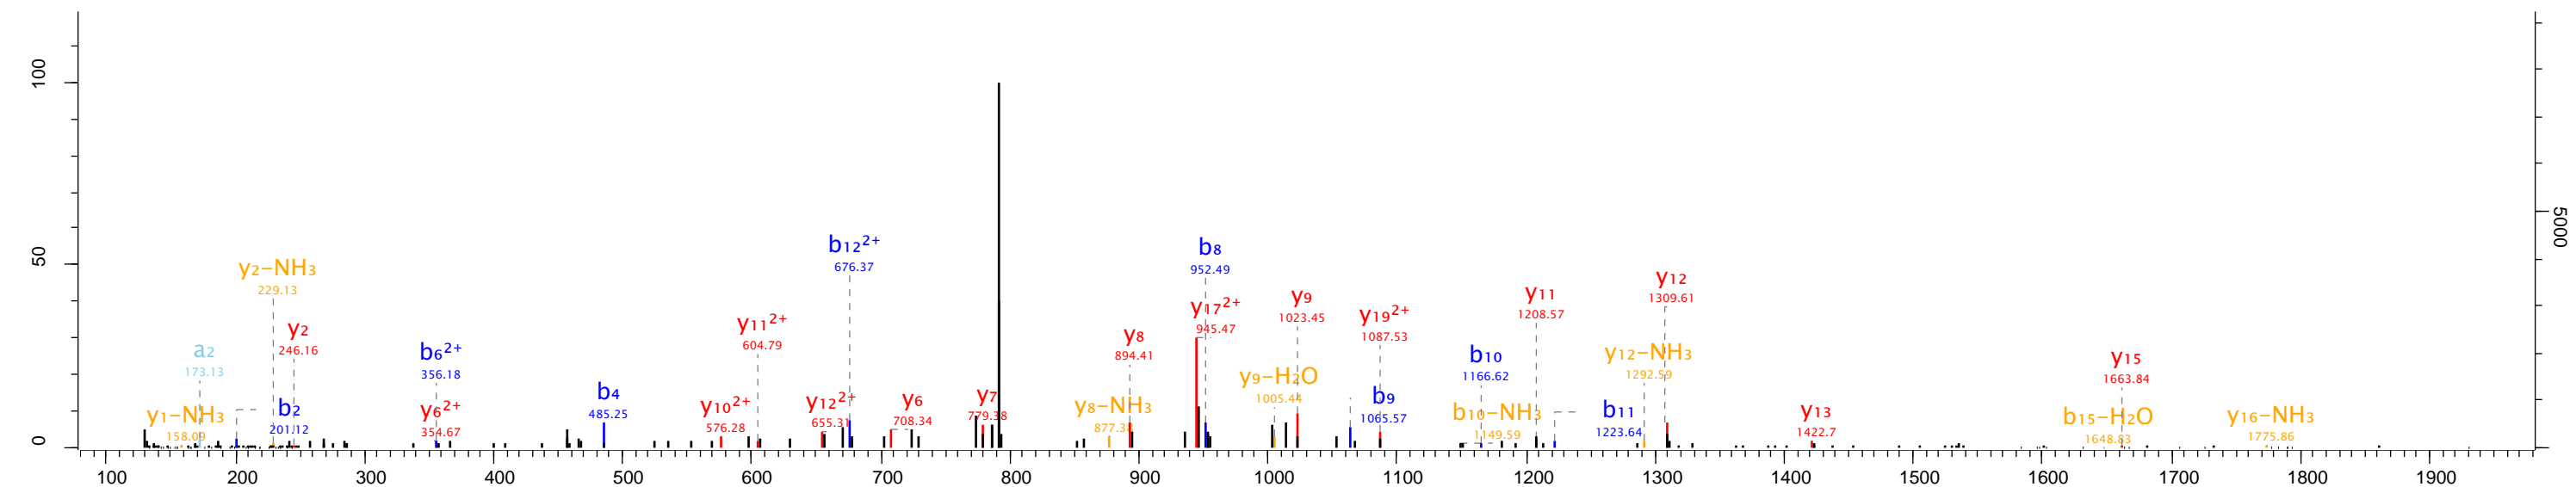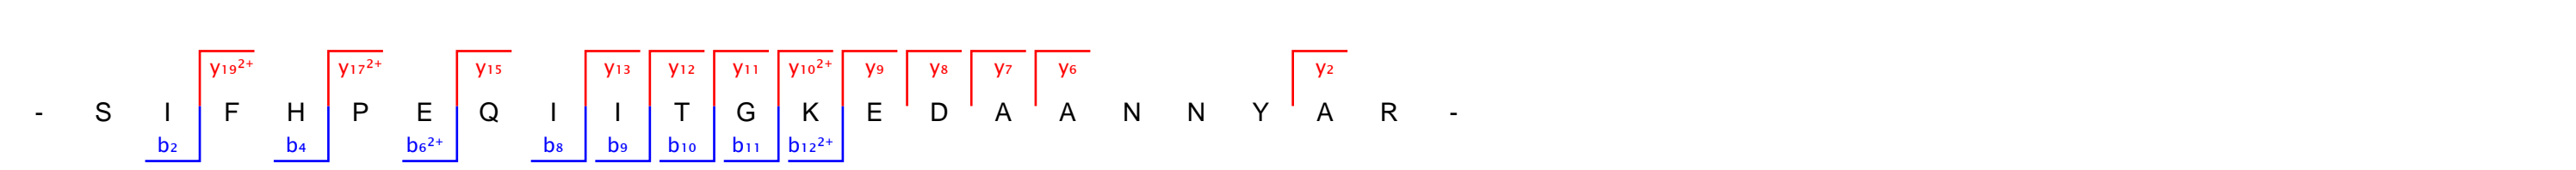

Raw file: 2015-01-05\_CL03\_XenEmb\_x2  
 Scan: 26628 Method: ITMS; HCD Score: 91.07 m/z: 792.4

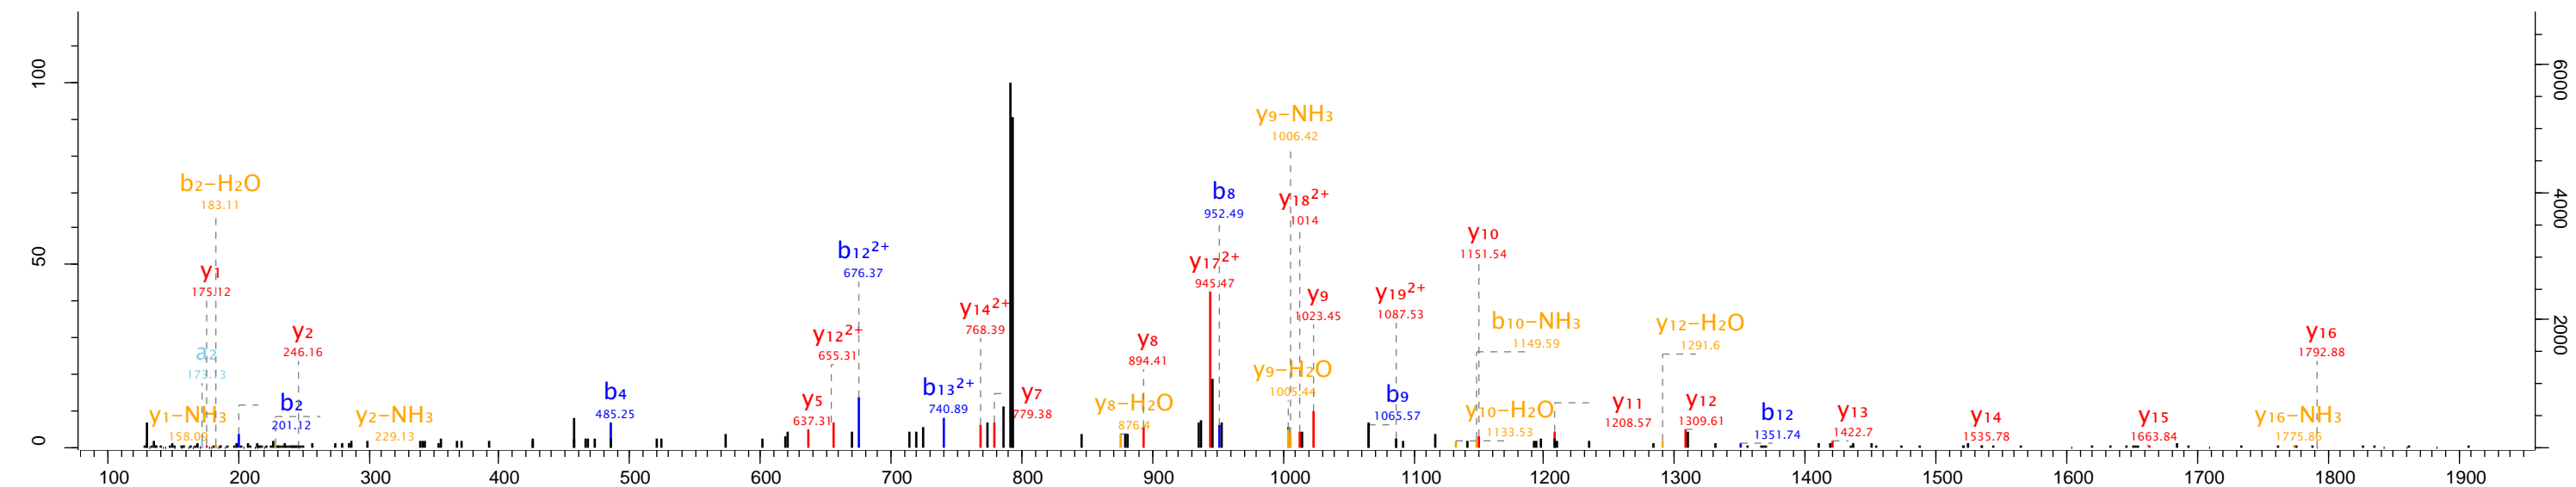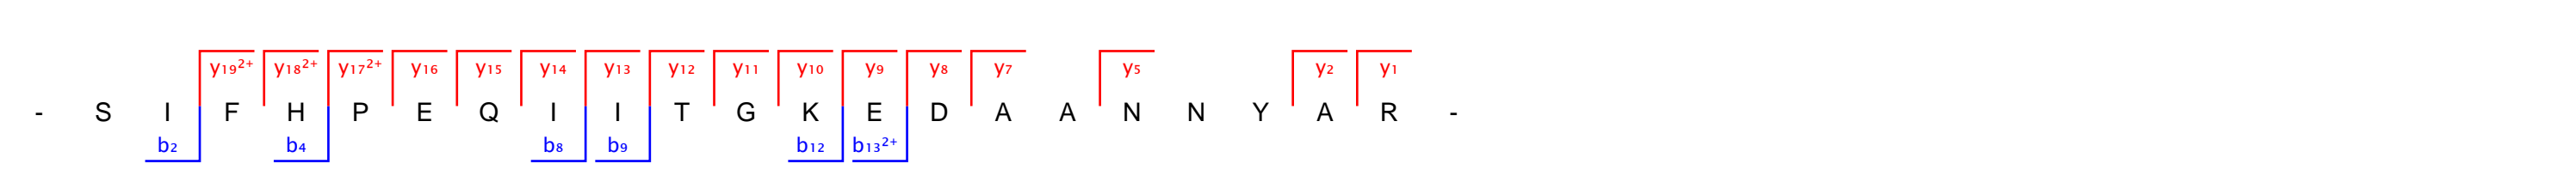

Raw file: 2015-01-05\_CL03\_XenEmb\_x2  
 Scan: 26713 Method: ITMS; HCD Score: 107.17 m/z: 475.96

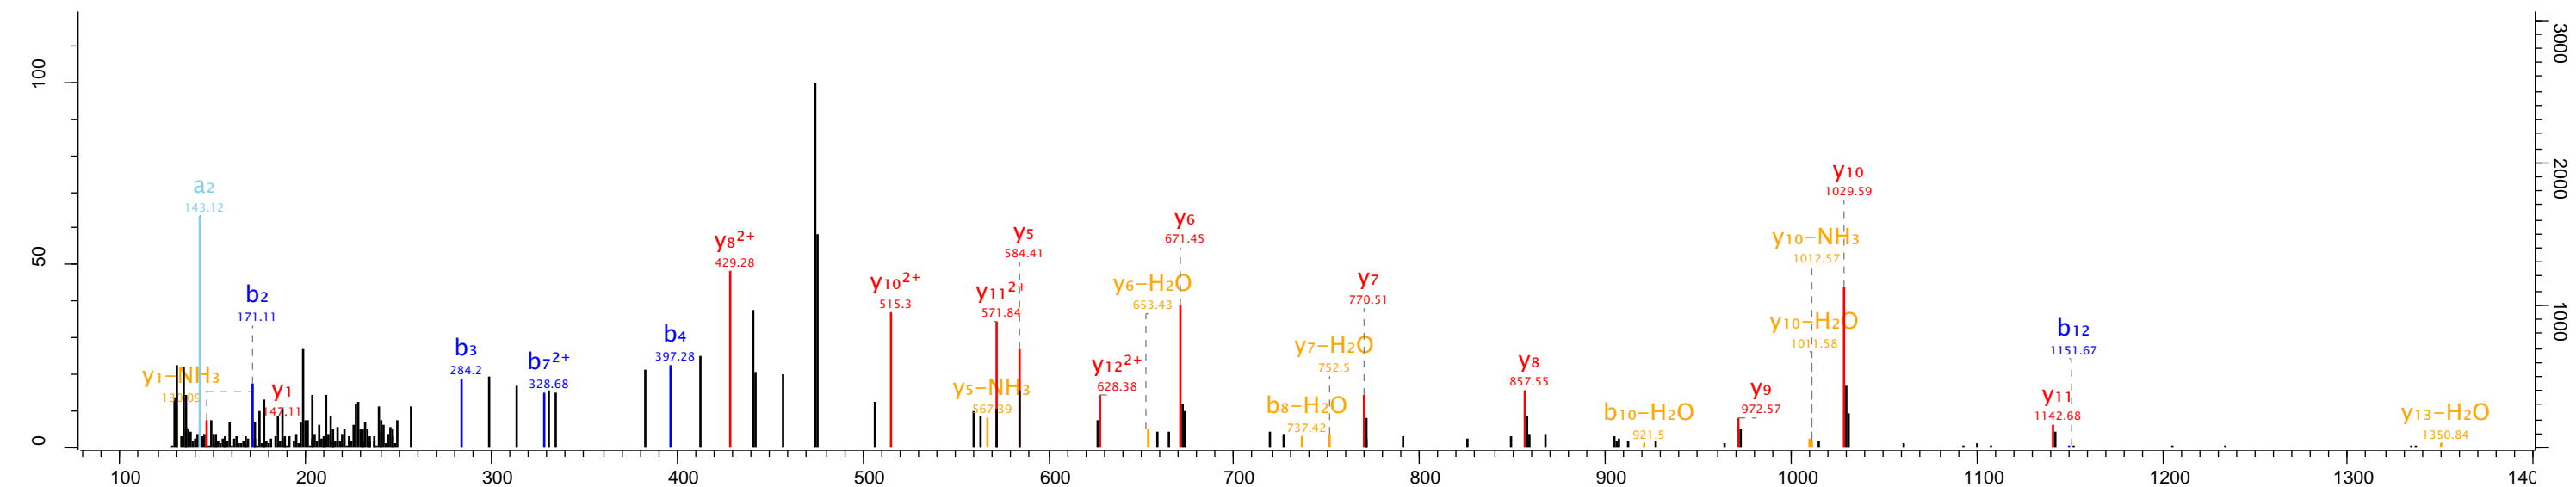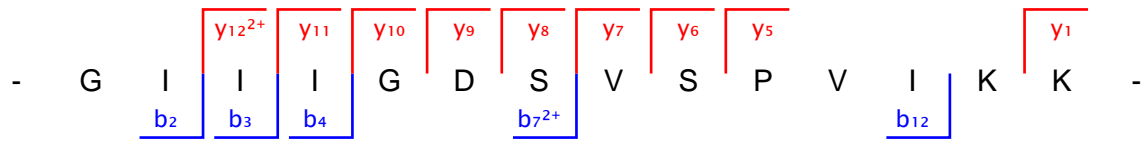

Spectral Annotation for Single-Peptide IDs in 16-cell Embryo using Q-OT-LIT

Raw file 2015-01-05\_CL03\_XenEmb\_x2 Scan 26725 Method ITMS; HCD Score 66.78 m/z 564.63

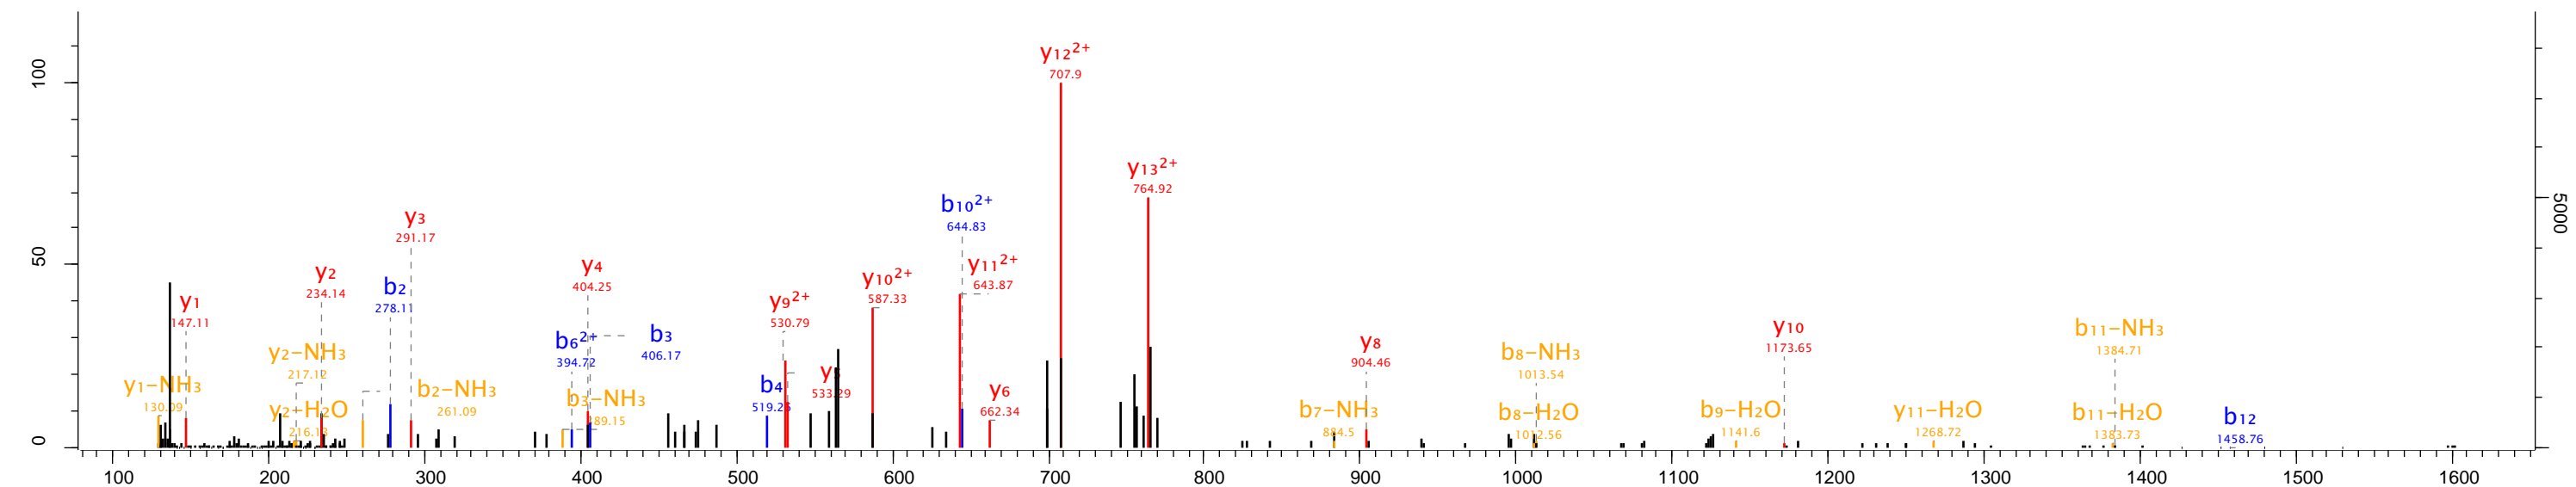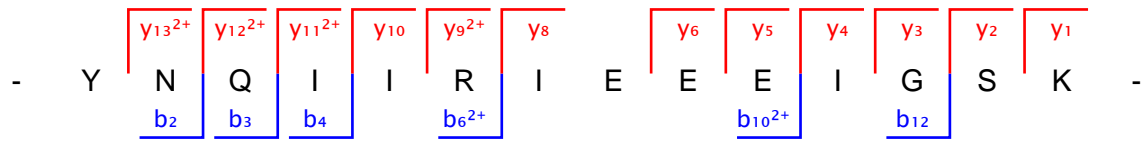

Raw file: 2015-01-05\_CL03\_XenEmb\_x2  
 Scan: 26751  
 Method: ITMS; HCD  
 Score: 77.97  
 m/z: 634.33

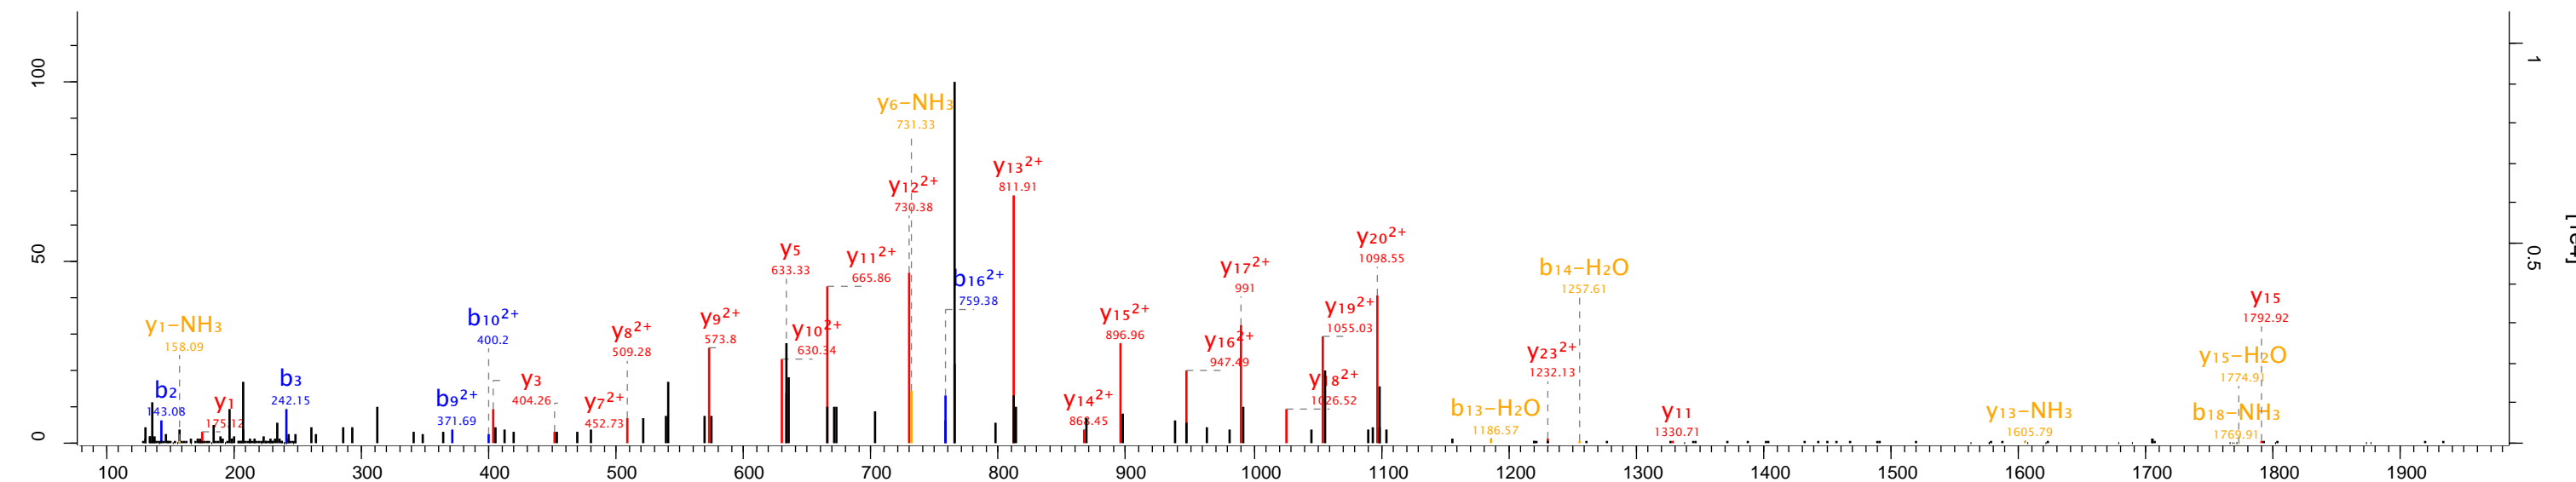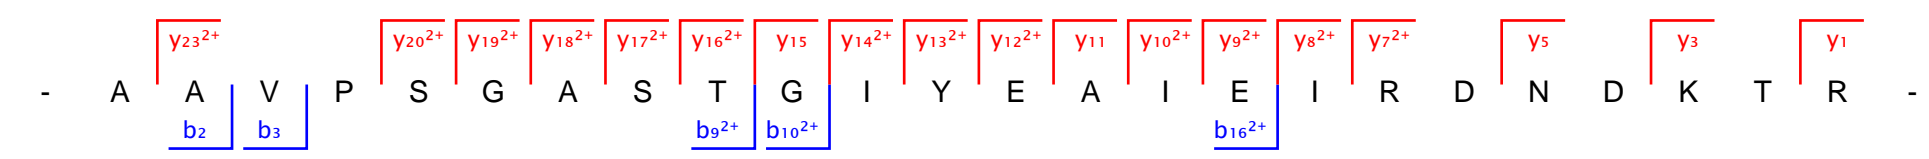

Spectral Annotation for Single-Peptide IDs in 16-cell Embryo using Q-OT-LIT

Raw file: 2015-01-05\_CL03\_XenEmb\_x2  
 Scan: 26755 Method: ITMS; HCD Score: 72.89 m/z: 475.96

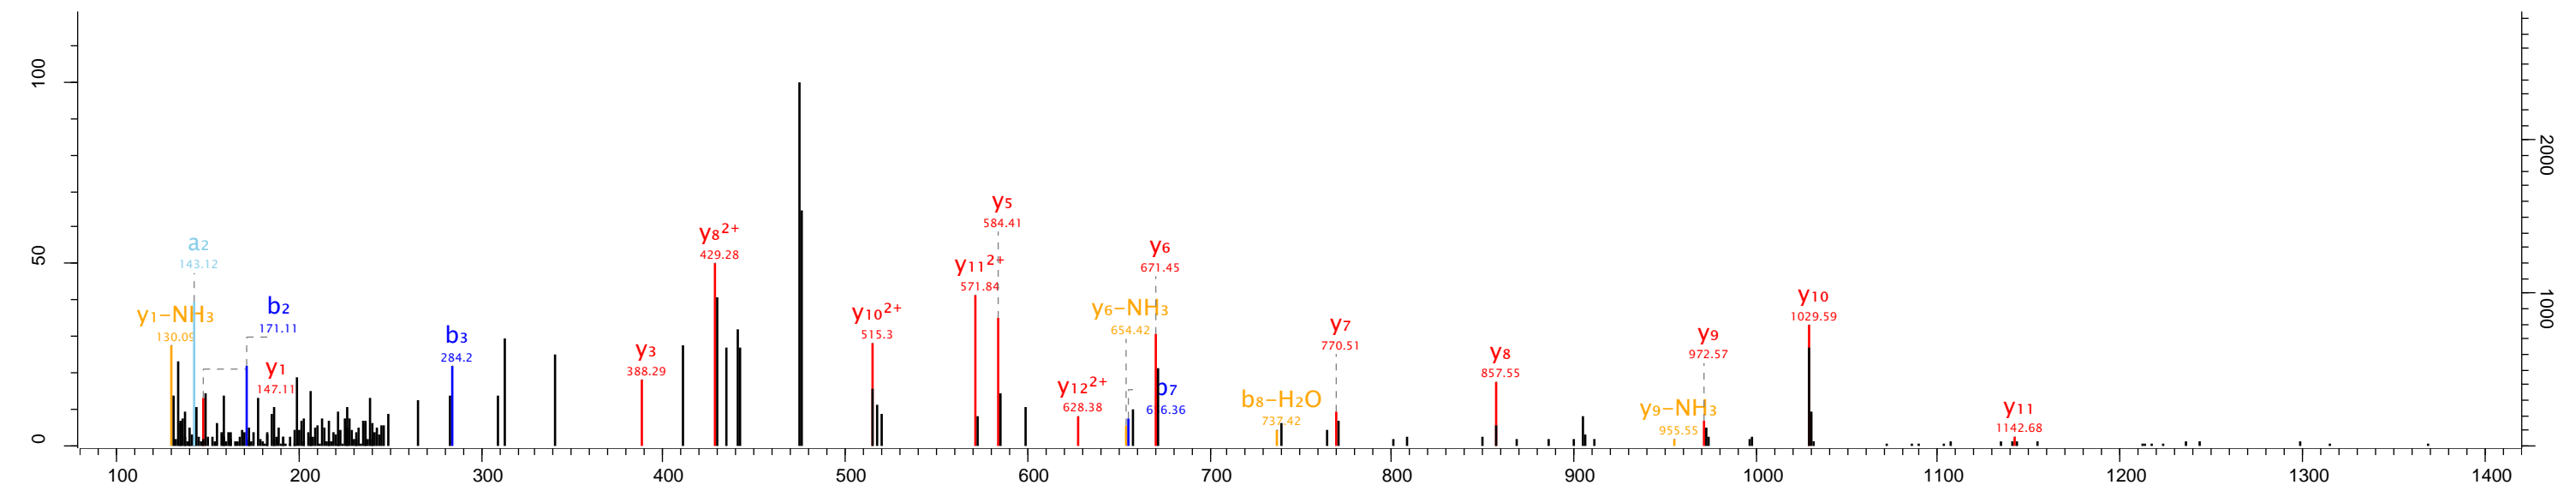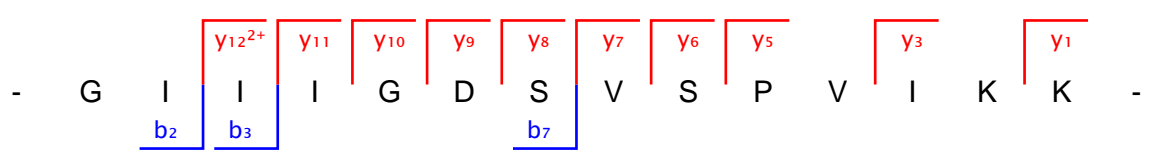

Raw file 2015-01-05\_CL03\_XenEmb\_x2 Scan 26766 Method ITMS; HCD Score 107.53 m/z 564.97

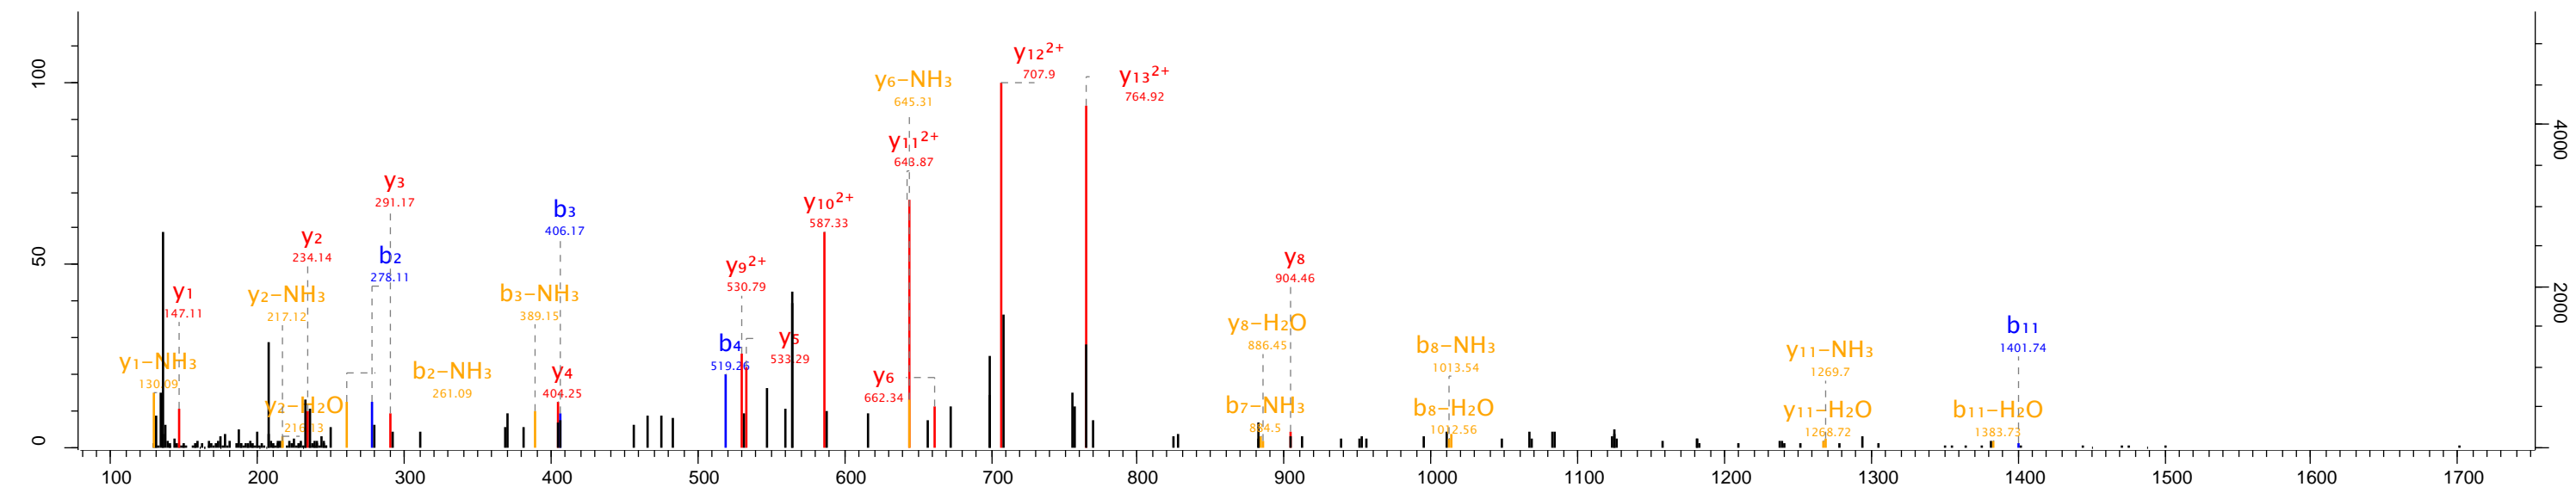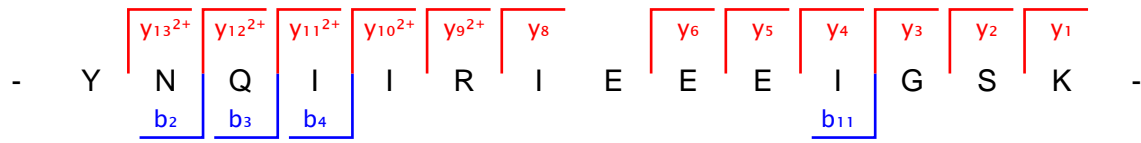

Raw file 2015-01-05\_CL03\_XenEmb\_x2 Scan 26780 Method ITMS; HCD Score 60.33 m/z 579.81

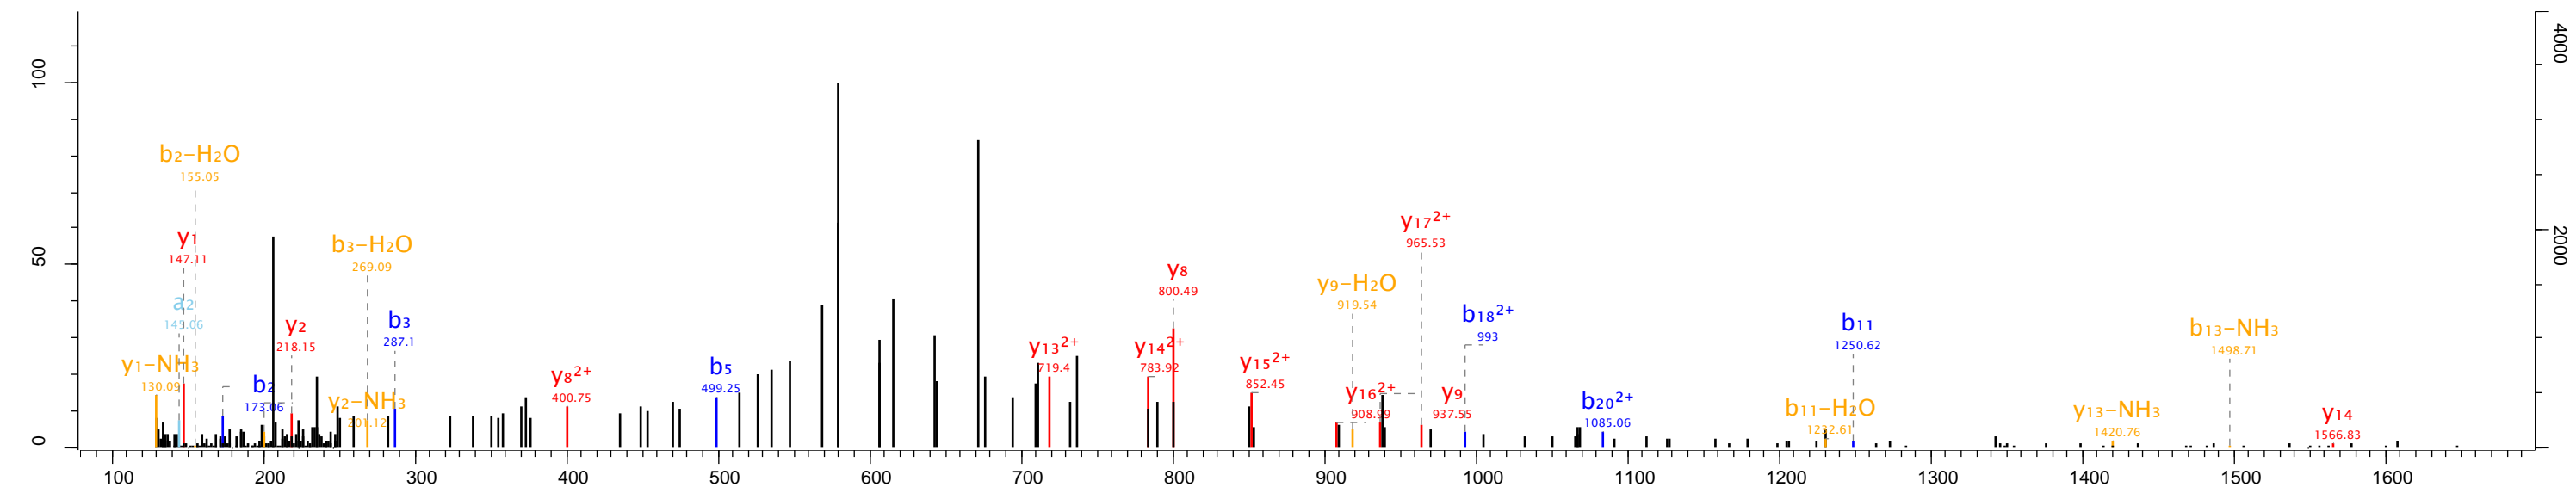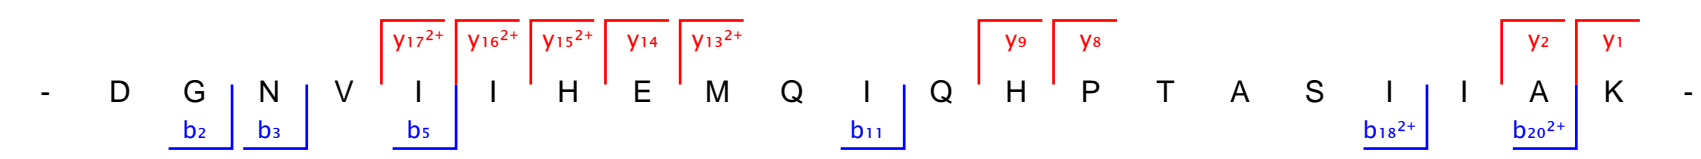



Raw file: 2015-01-05\_CL03\_XenEmb\_x2  
 Scan: 26787  
 Method: ITMS; HCD  
 Score: 90.69  
 m/z: 564.97

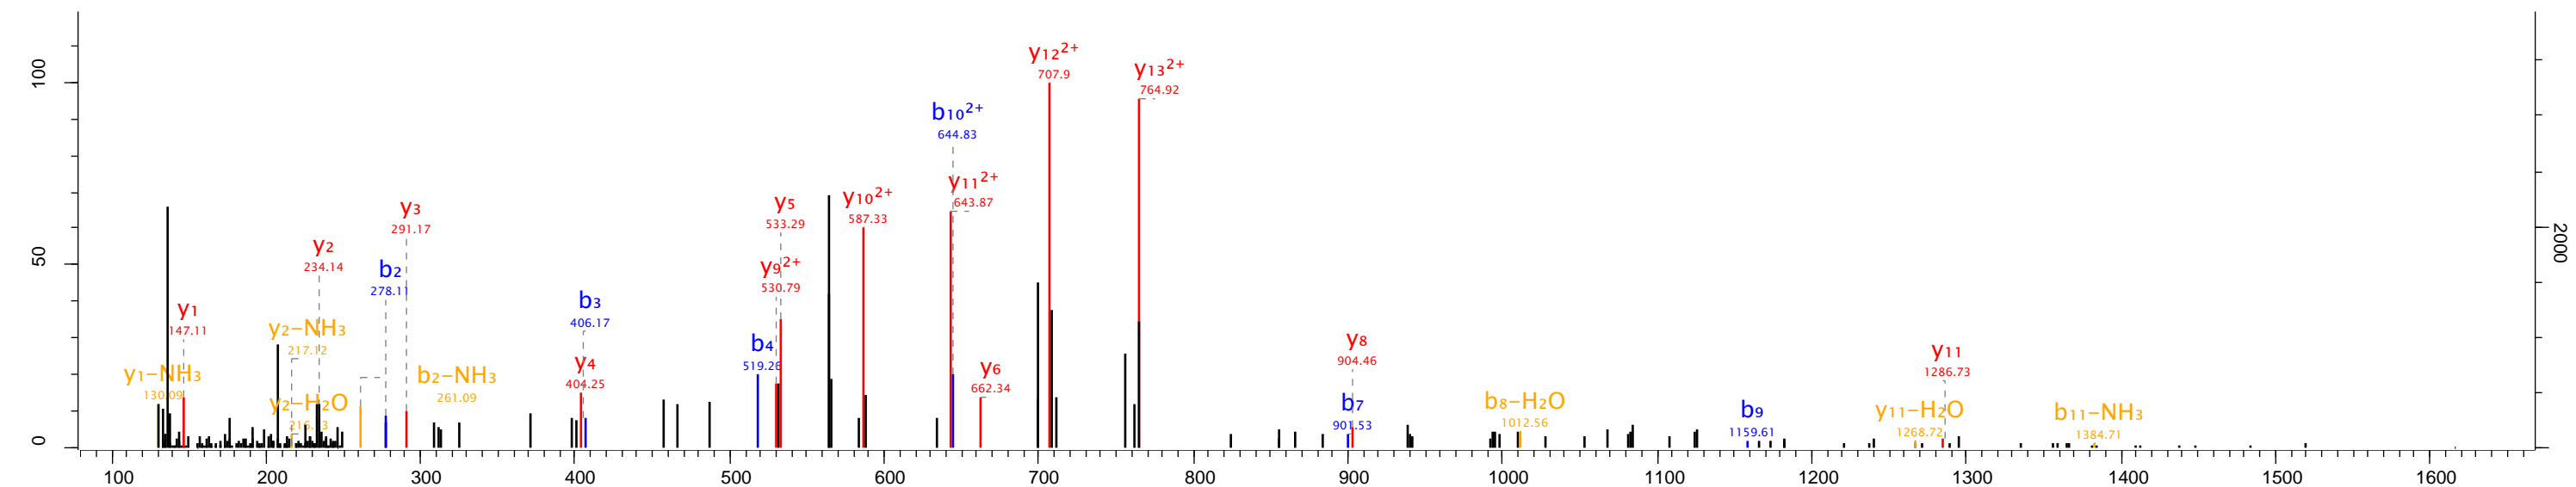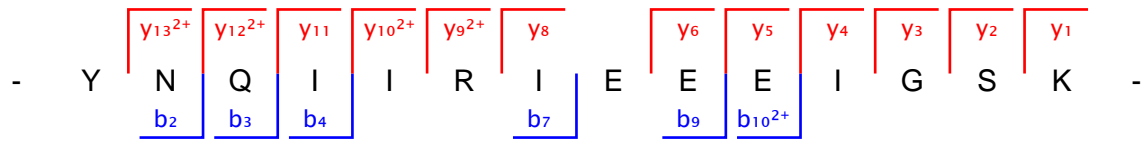

Spectral Annotation for Single-Peptide IDs in 16-cell Embryo using Q-OT-LIT

Raw file: 2015-01-05\_CL03\_XenEmb\_x2  
 Scan: 26793 Method: ITMS; HCD Score: 65.04 m/z: 776.39

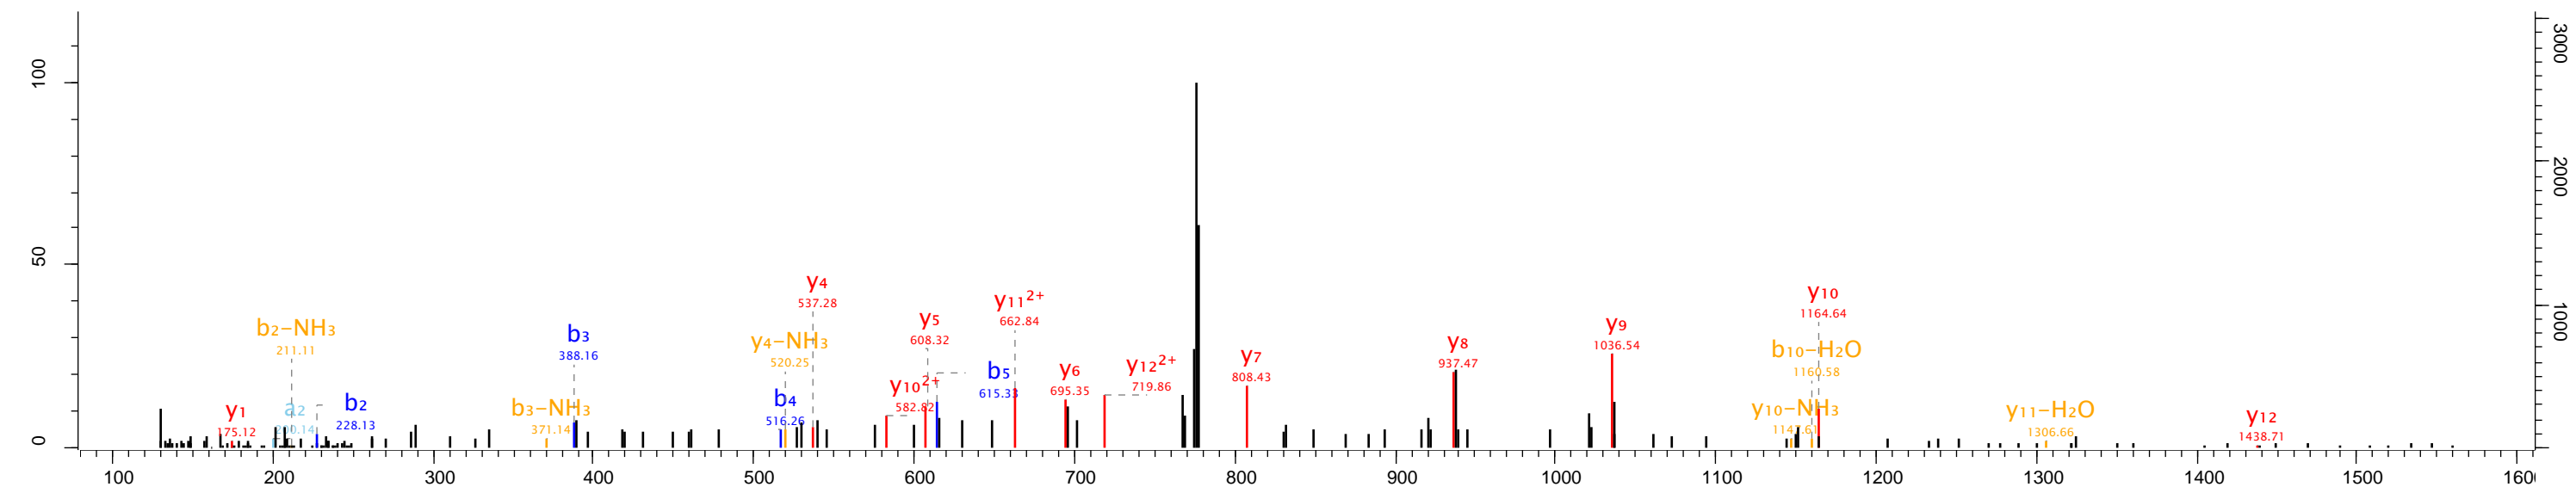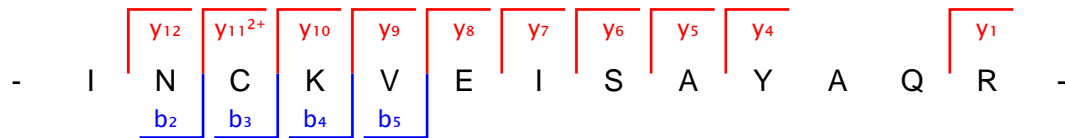

Raw file: 2015-01-05\_CL03\_XenEmb\_x2  
 Scan: 26796 Method: ITMS; HCD Score: 41.69 m/z: 772.74

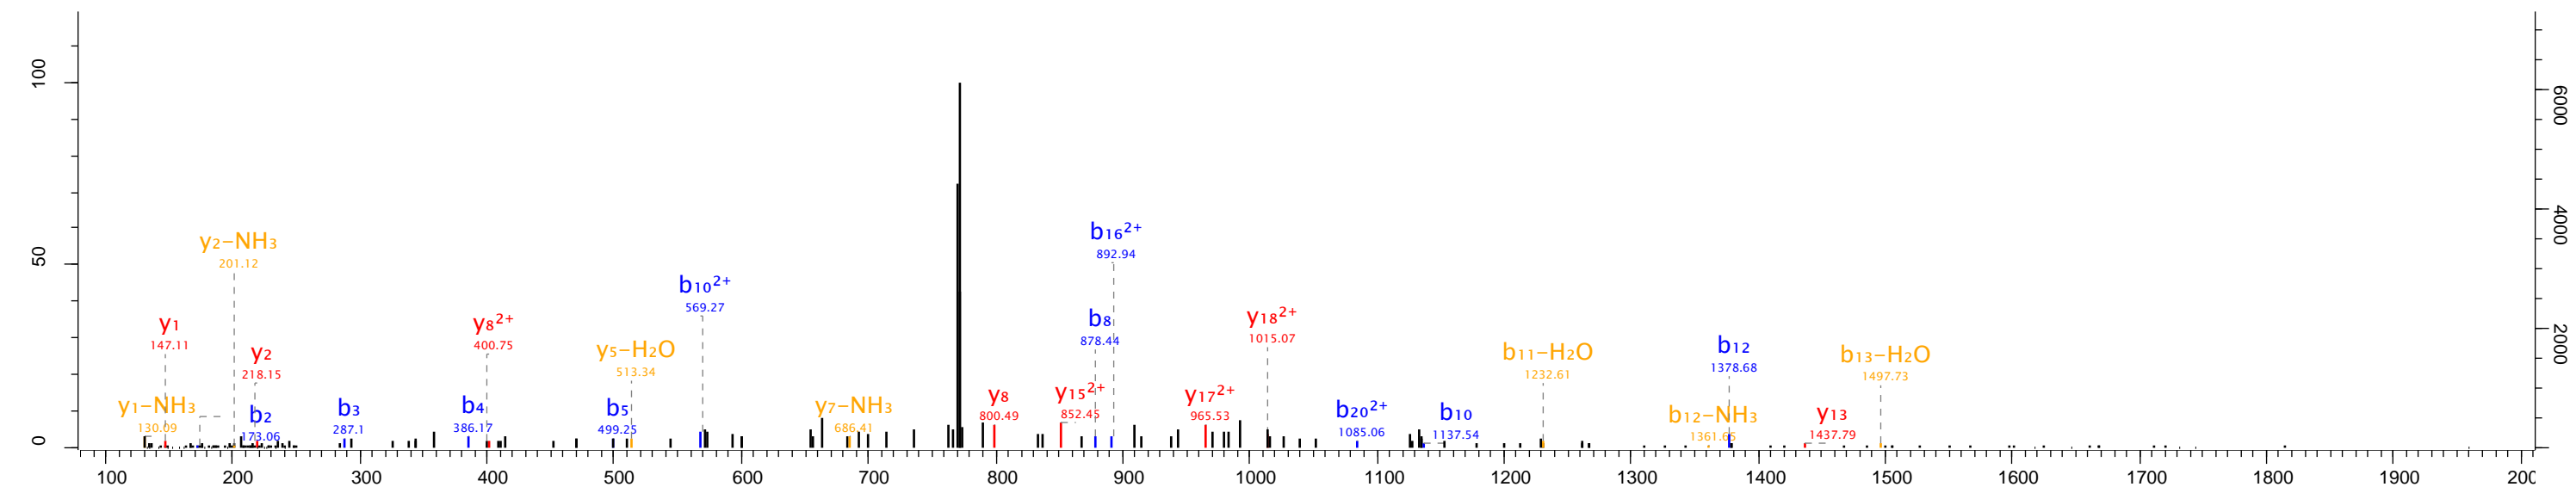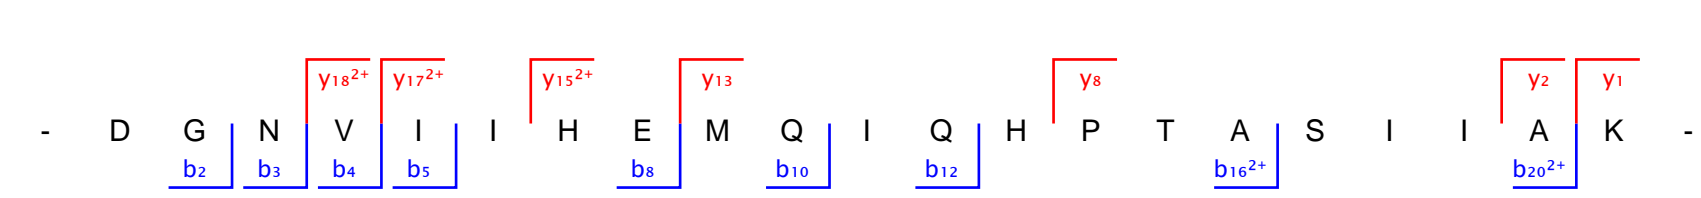

Spectral Annotation for Single-Peptide IDs in 16-cell Embryo using Q-OT-LIT

Raw file 2015-01-05\_CL03\_XenEmb\_x2 Scan 26807 Method ITMS; HCD Score 65.81 m/z 564.63

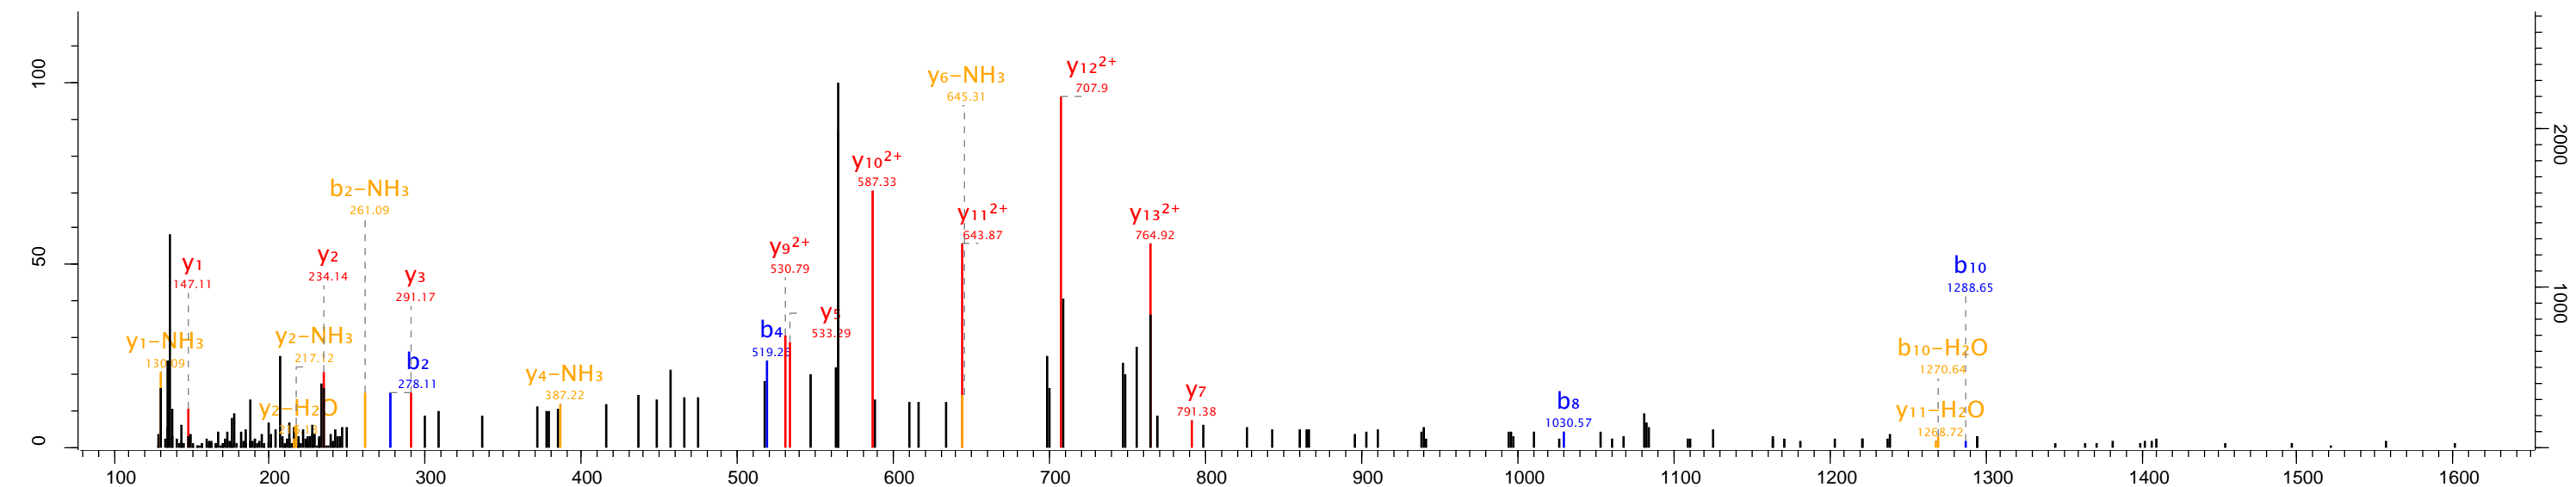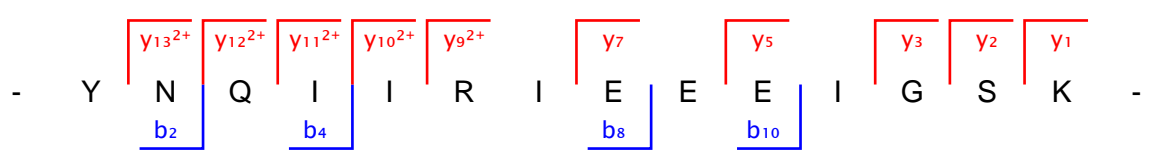

Spectral Annotation for Single-Peptide IDs in 16-cell Embryo using Q-OT-LIT

Raw file 2015-01-05\_CL03\_XenEmb\_x2 Scan 26810 Method ITMS; HCD Score 118.76 m/z 517.93

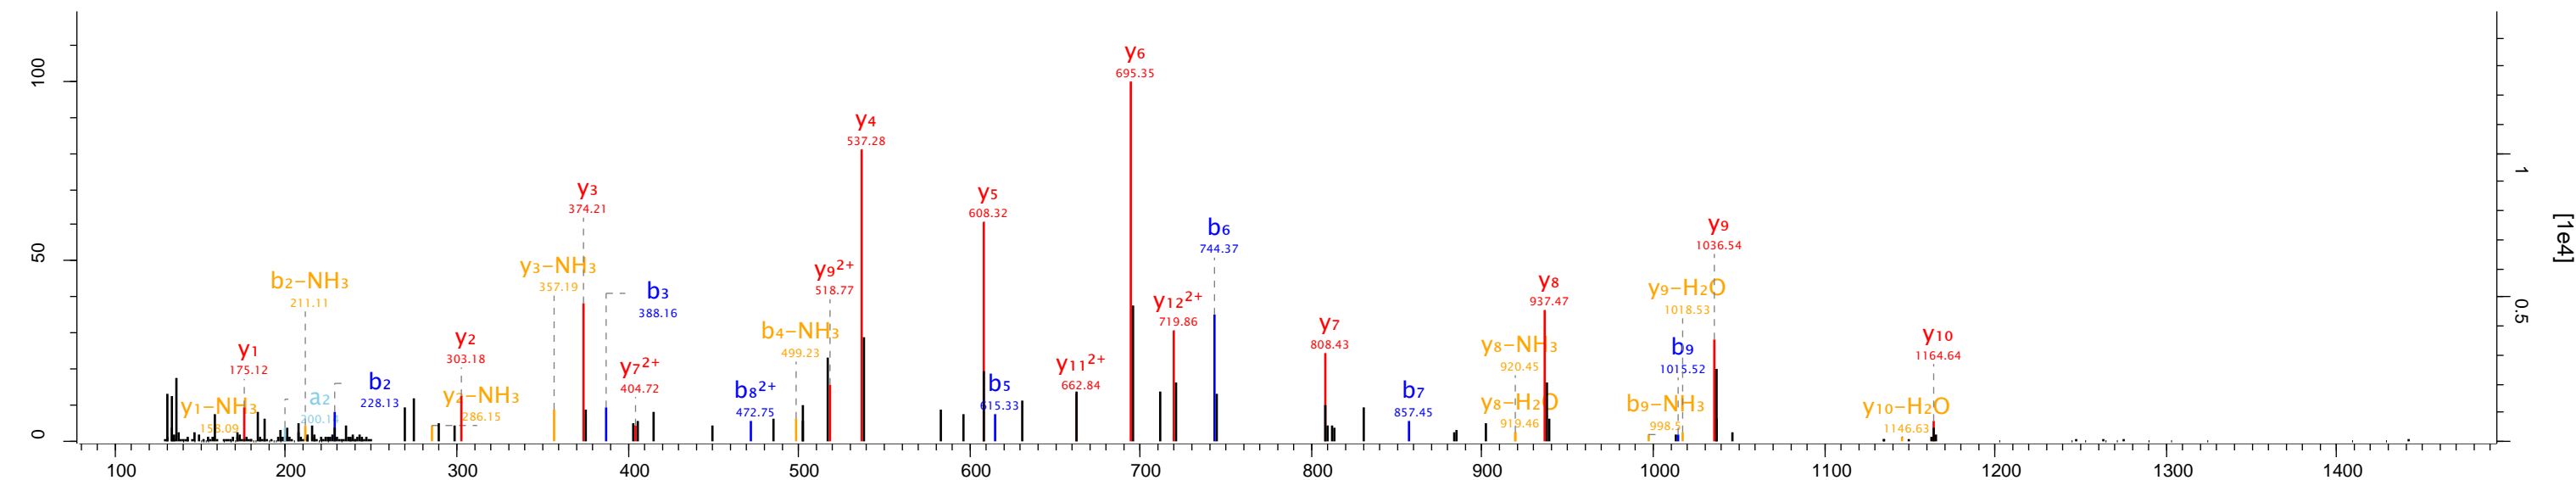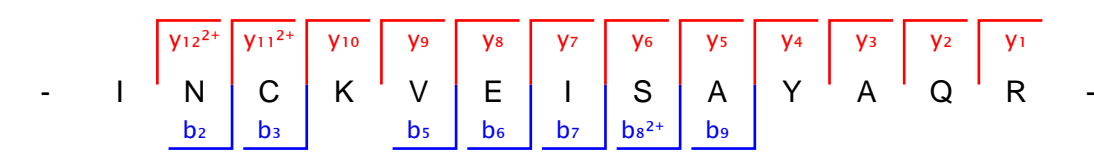

Spectral Annotation for Single-Peptide IDs in 16-cell Embryo using Q-OT-LIT

Raw file 2015-01-05\_CL03\_XenEmb\_x2 Scan 26832 Method ITMS; HCD Score 71.53 m/z 776.41

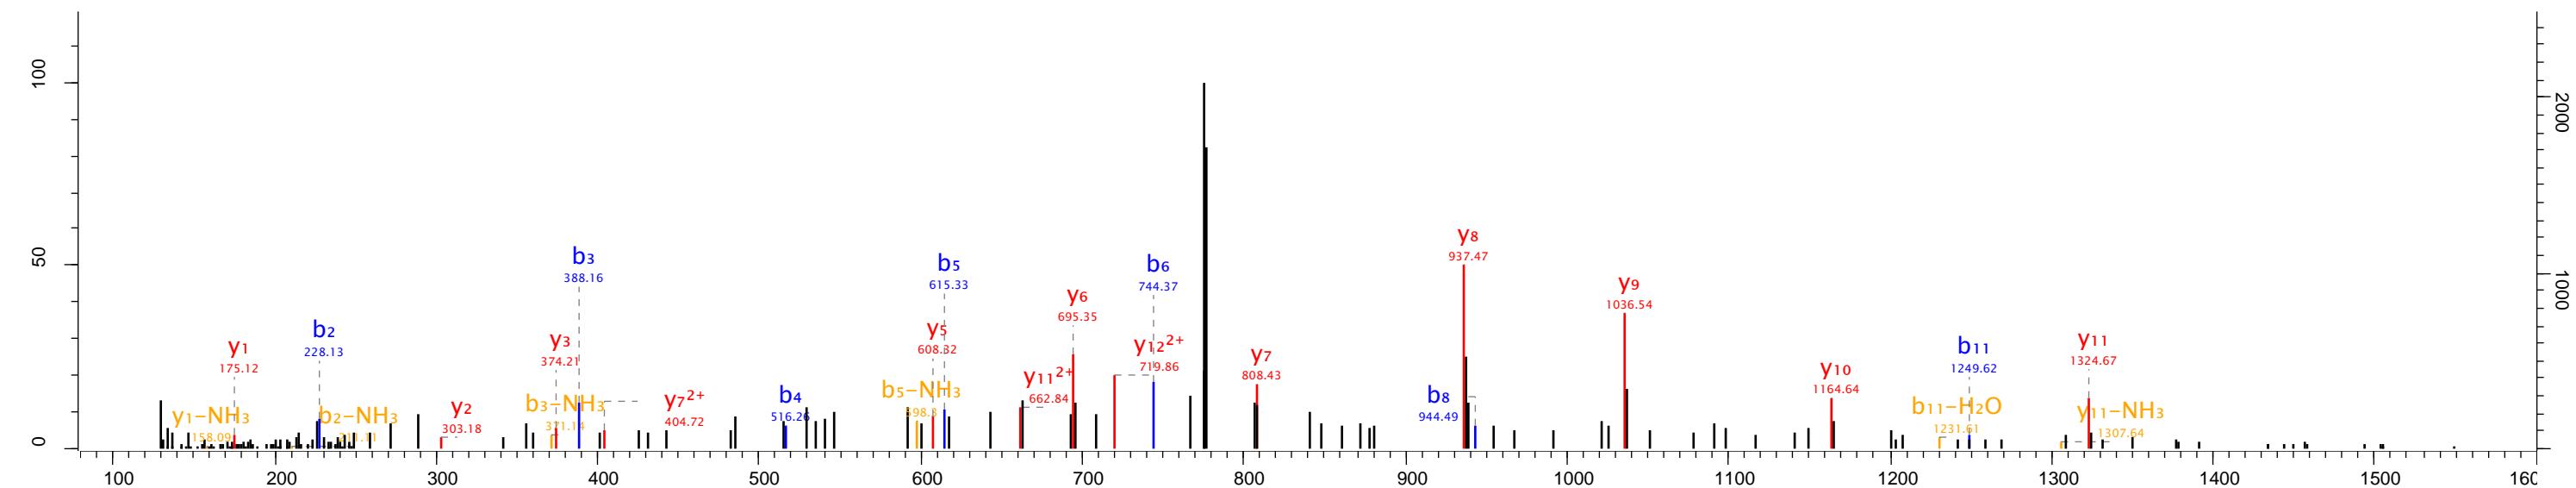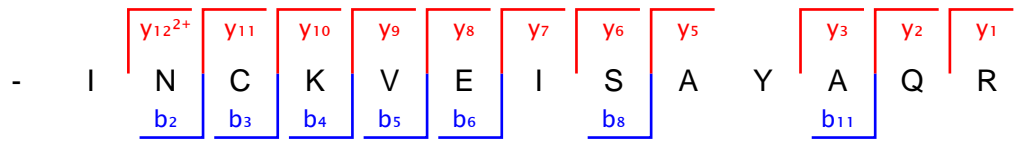

Spectral Annotation for Single-Peptide IDs in 16-cell Embryo using Q-OT-LIT

Raw file: 2015-01-05\_CL03\_XenEmb\_x2  
 Scan: 26845 Method: ITMS; HCD Score: 129.76 m/z: 517.94

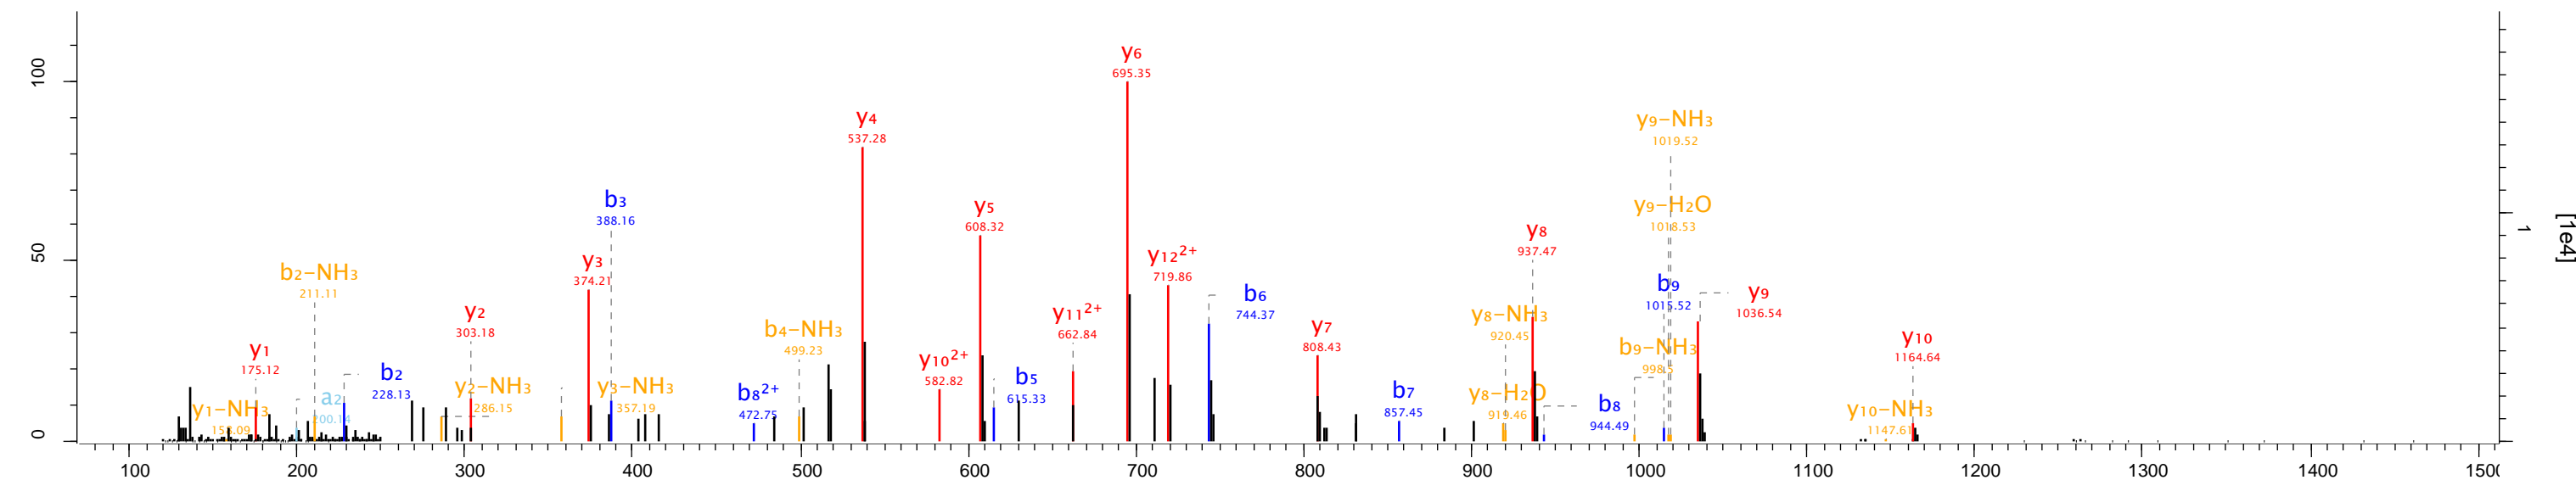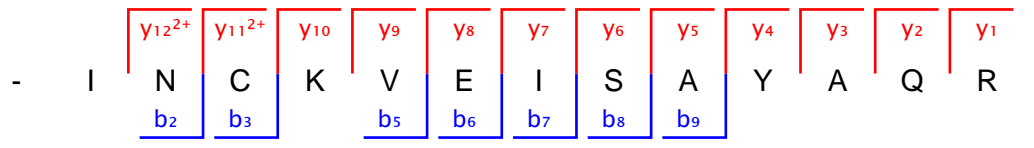

Raw file: 2015-01-05\_CL03\_XenEmb\_x2  
 Scan: 26872 Method: ITMS; HCD Score: 89.26 m/z: 518.27

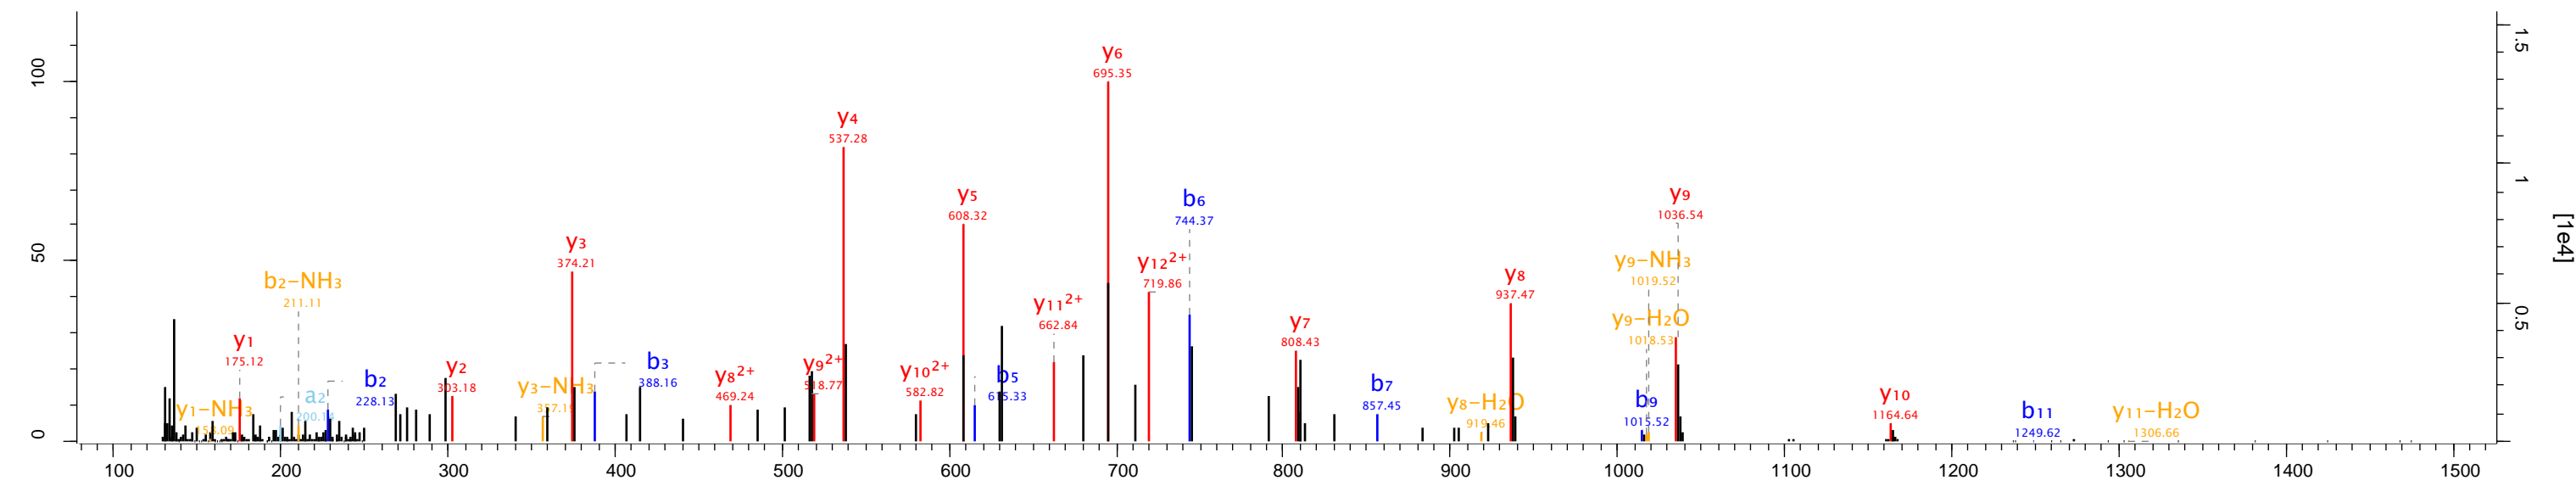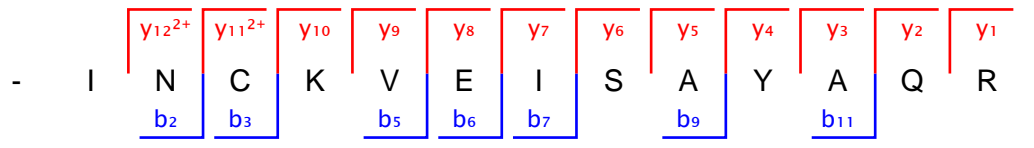

Spectral Annotation for Single-Peptide IDs in 16-cell Embryo using Q-OT-LIT



Raw file: 2015-01-05\_CL03\_XenEmb\_x2  
 Scan: 26875 Method: ITMS; HCD Score: 66.22 m/z: 744.9

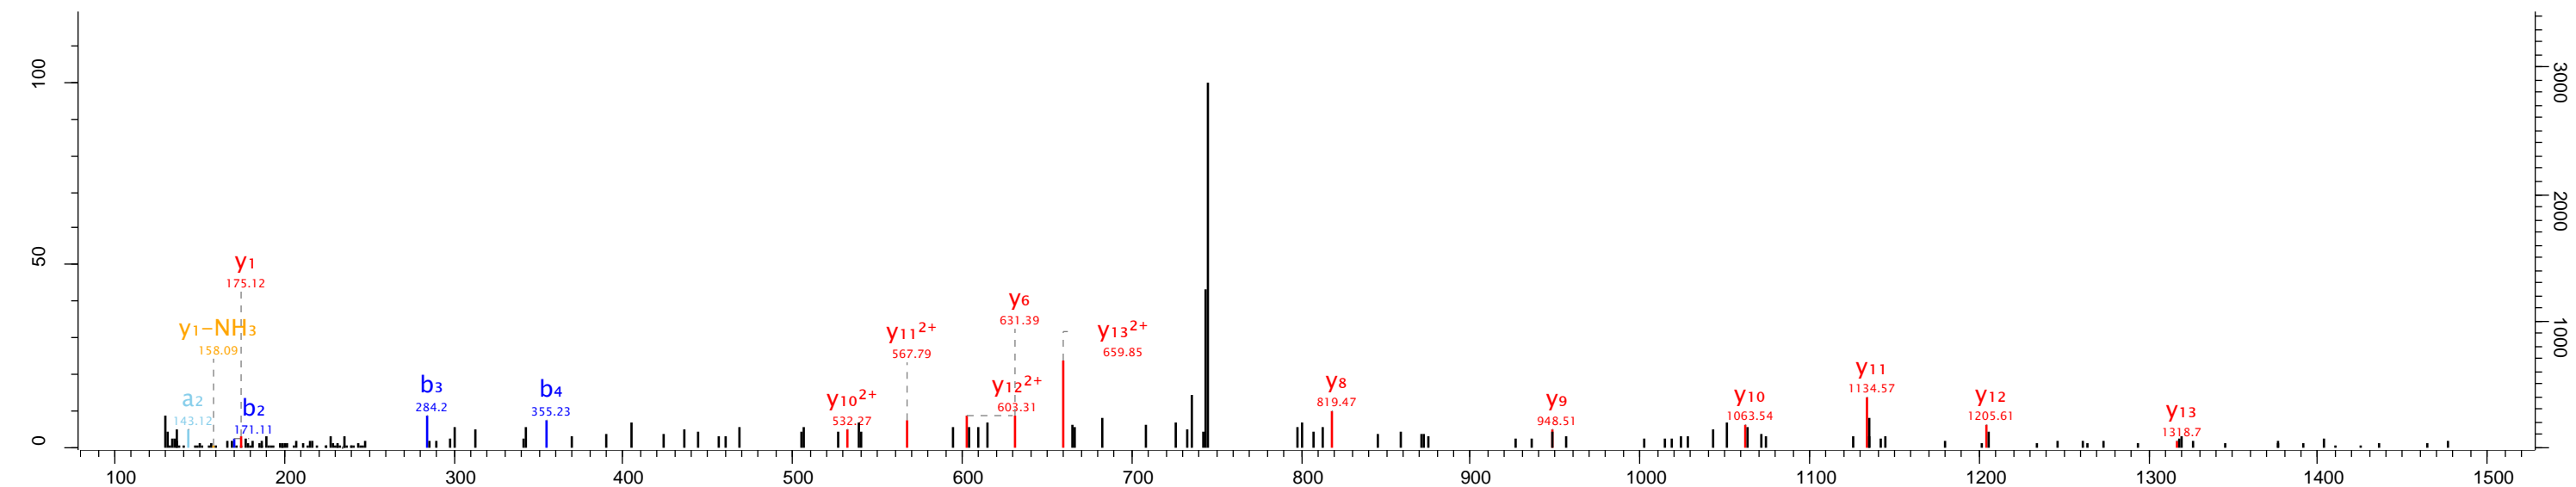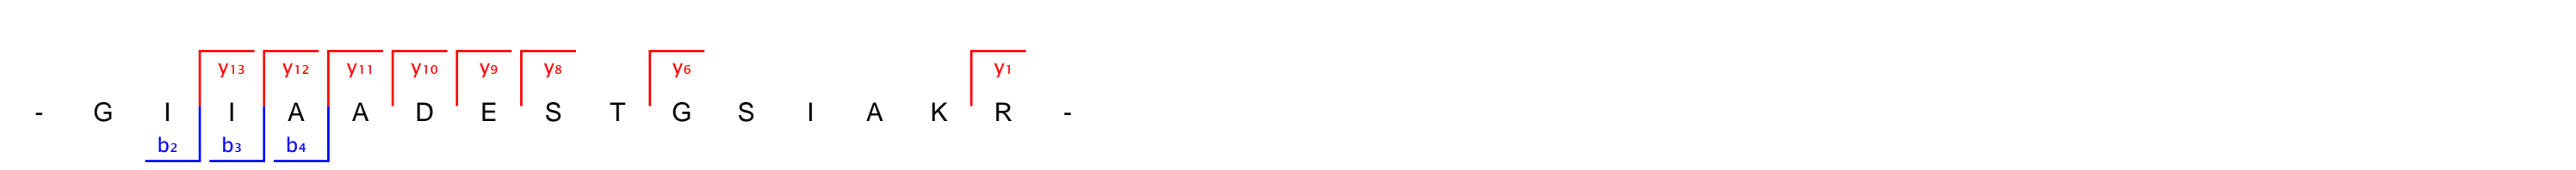

Raw file 2015-01-05\_CL03\_XenEmb\_x2  
 Scan 26895 Method ITMS; HCD Score 36.64 m/z 595.56

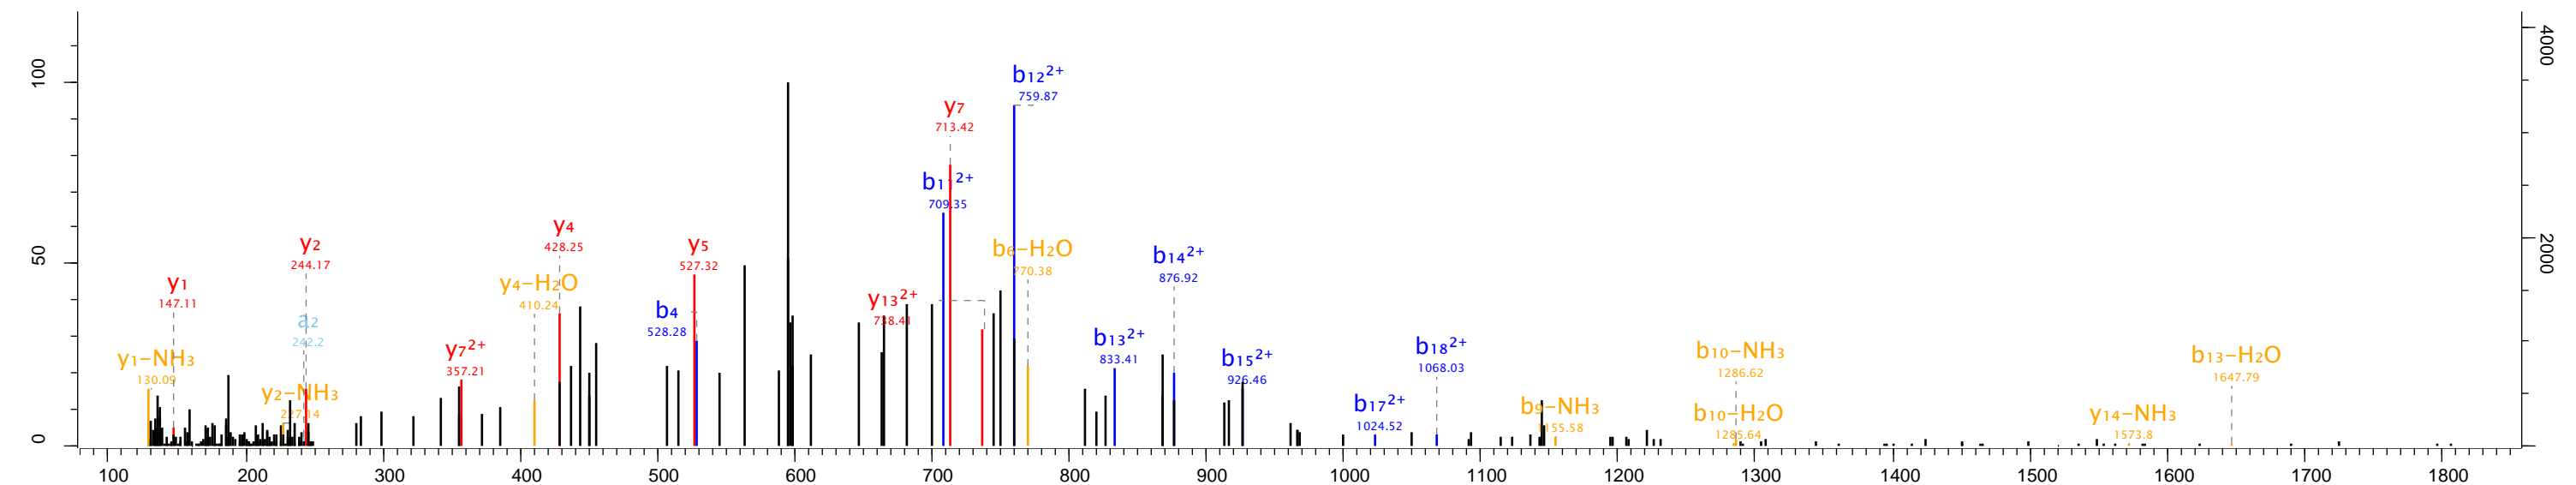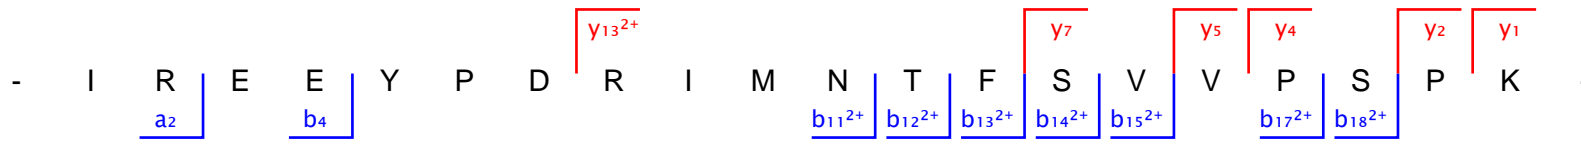

Raw file 2015-01-05\_CL03\_XenEmb\_x2 Scan 26899 Method ITMS; HCD Score 115.24 m/z 496.94

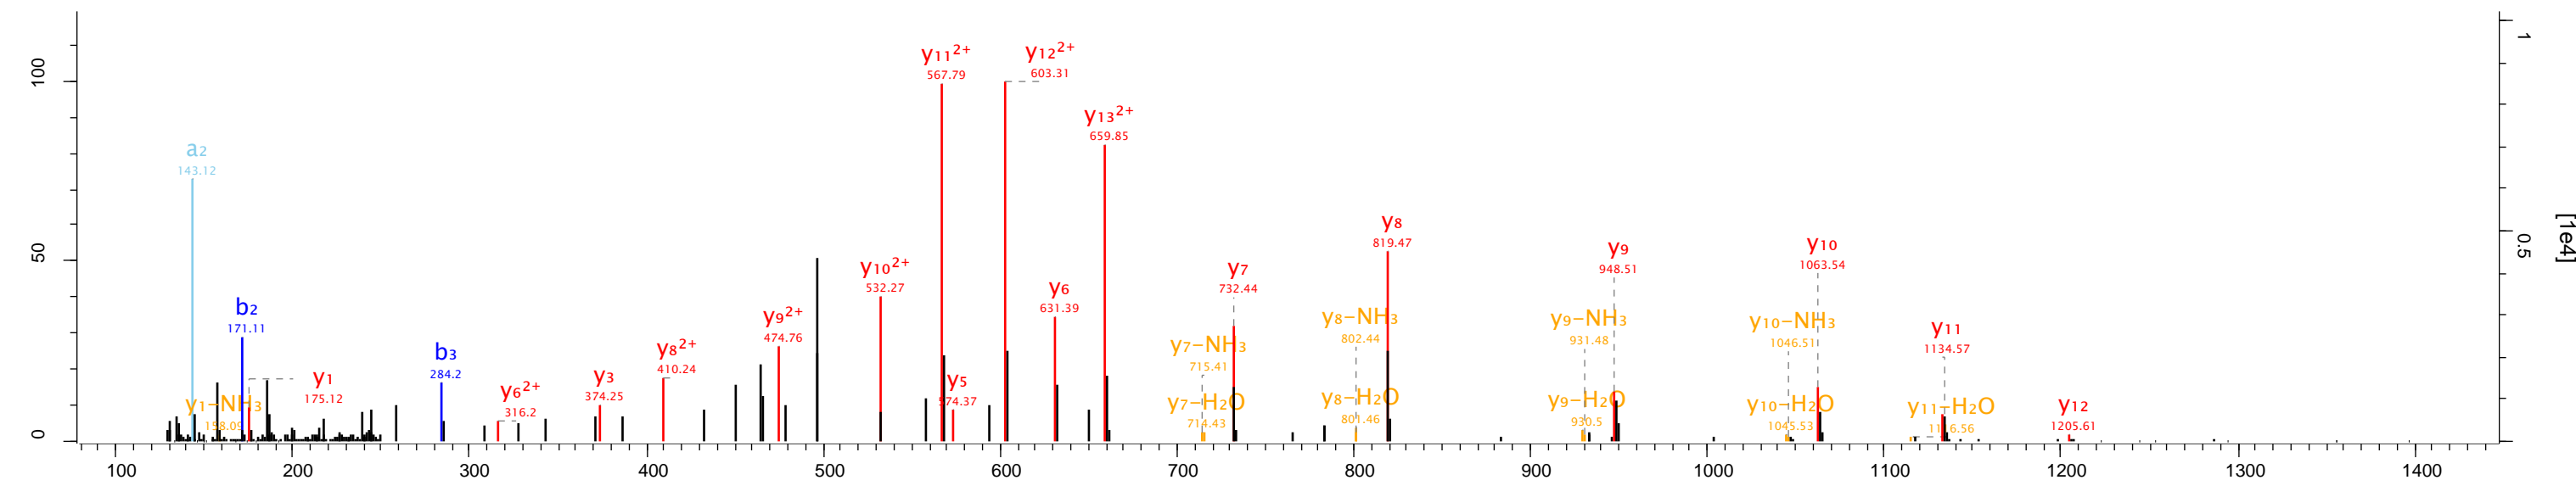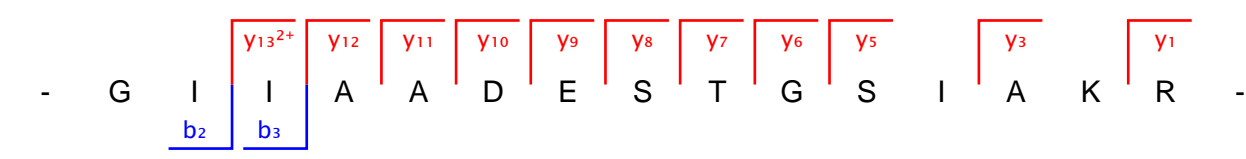

Raw file: 2015-01-05\_CL03\_XenEmb\_x2  
 Scan: 26900 Method: ITMS; HCD Score: 50.24 m/z: 845.43

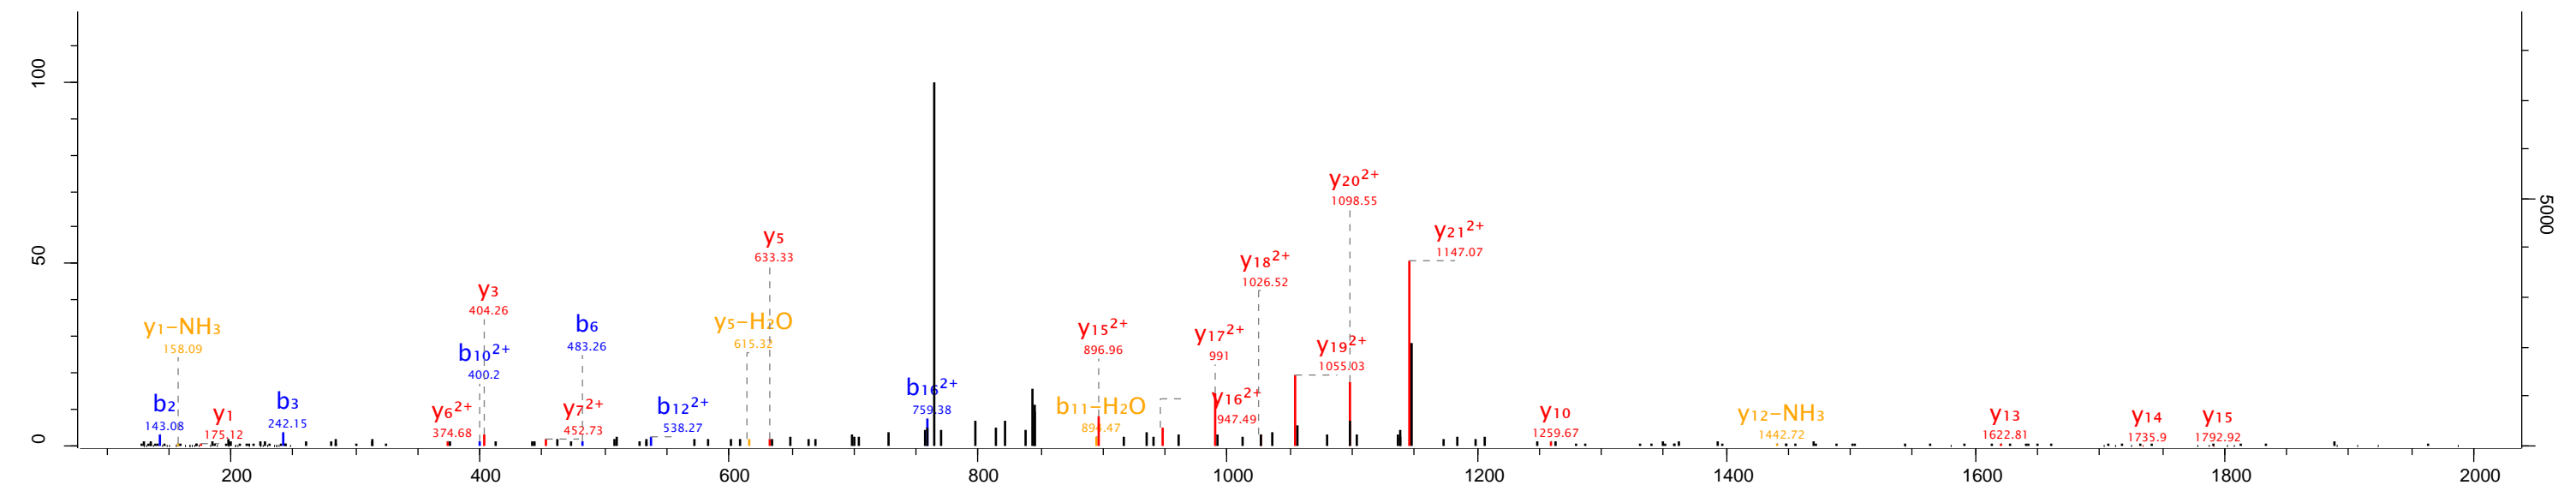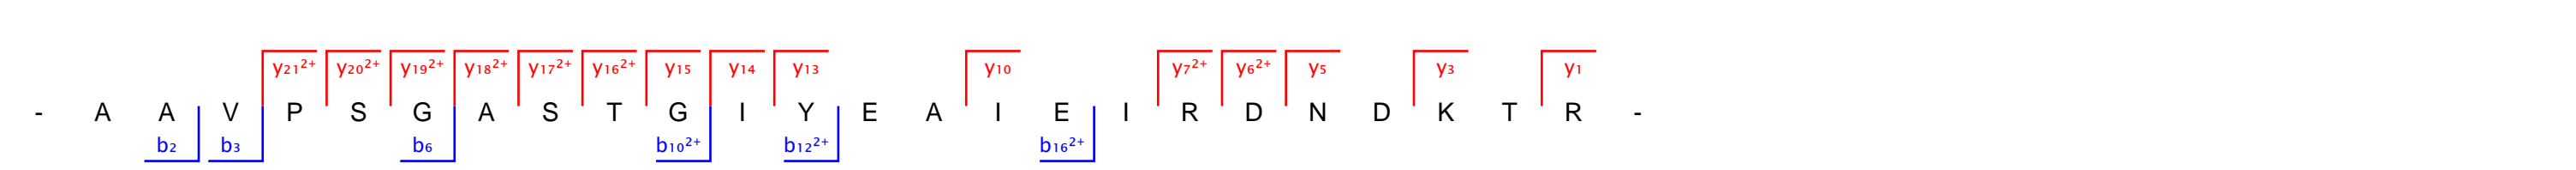

Raw file 2015-01-05\_CL03\_XenEmb\_x2 Scan 26906 Method ITMS; HCD Score 131.79 m/z 517.93

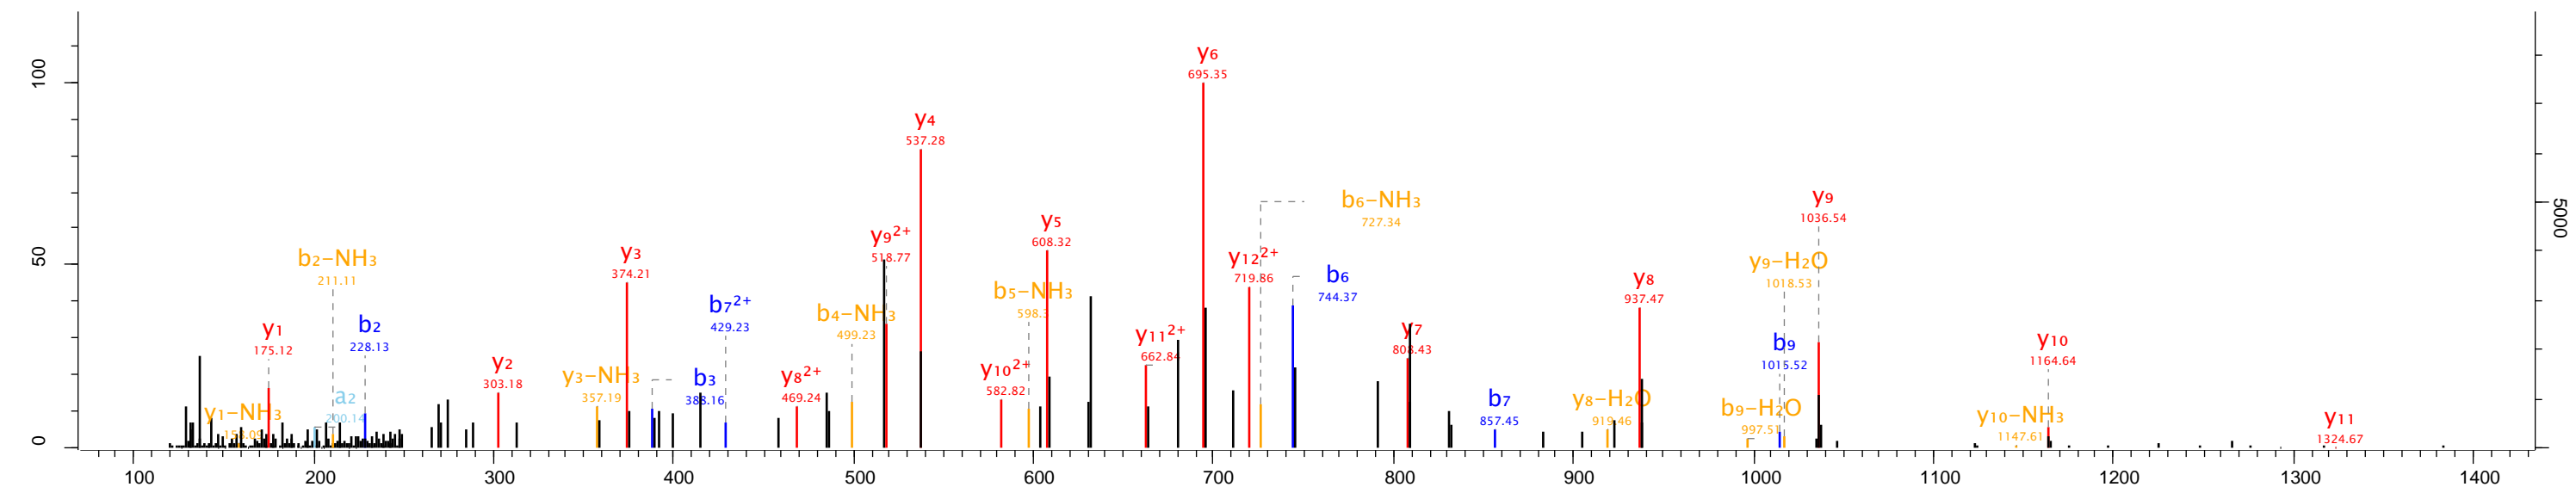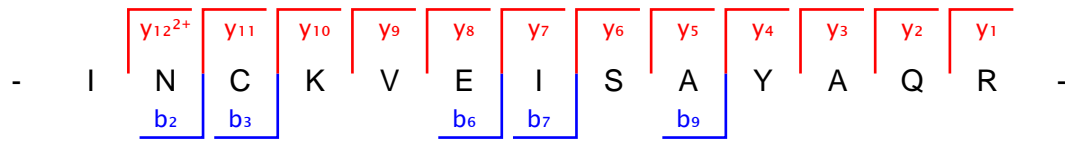

Spectral Annotation for Single-Peptide IDs in 16-cell Embryo using Q-OT-LIT

Raw file: 2015-01-05\_CL03\_XenEmb\_x2  
 Scan: 26915 Method: ITMS; HCD Score: 76.76 m/z: 745.41

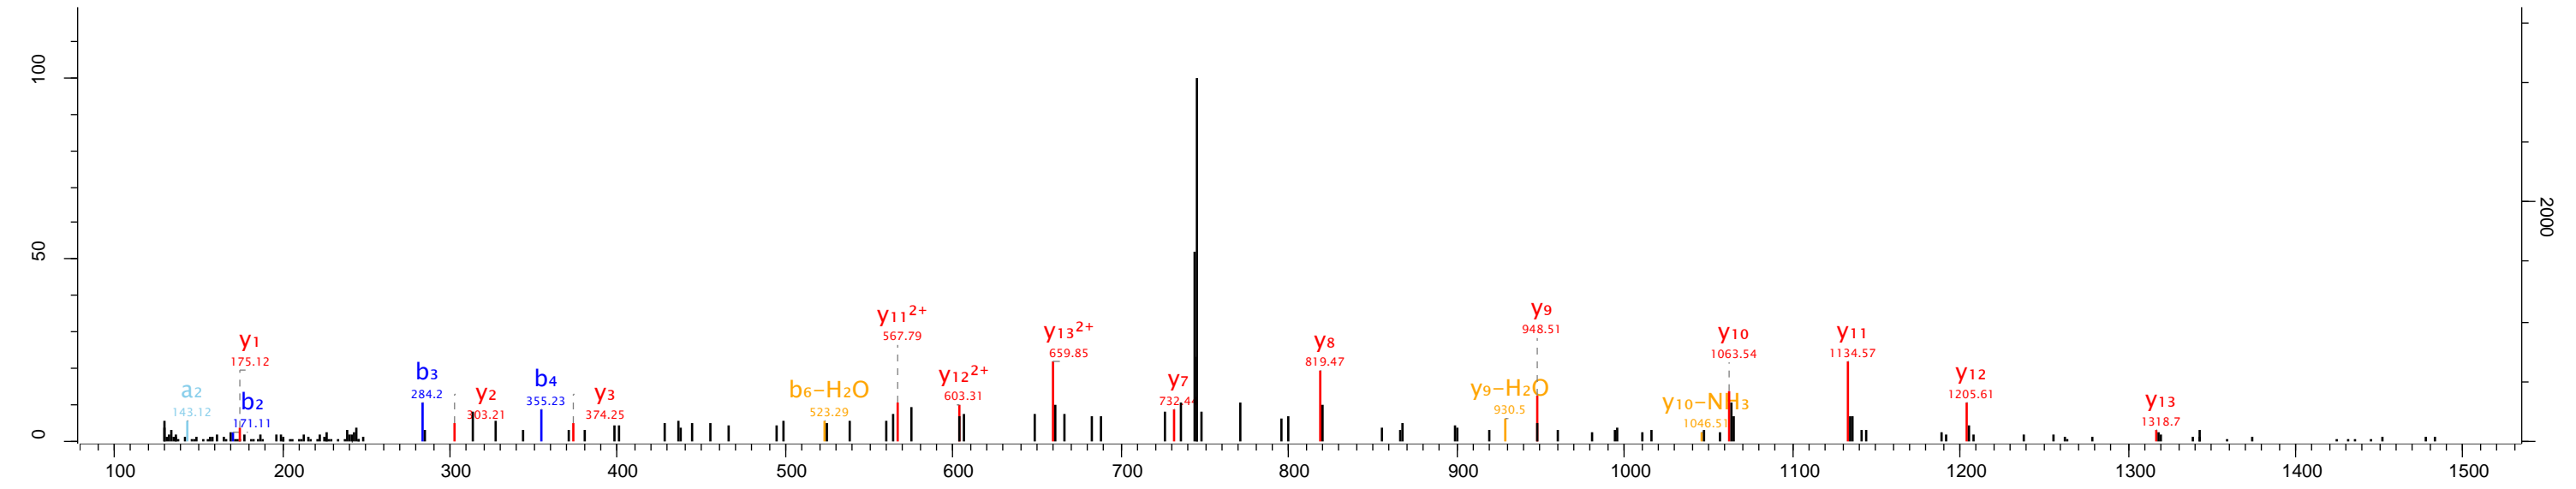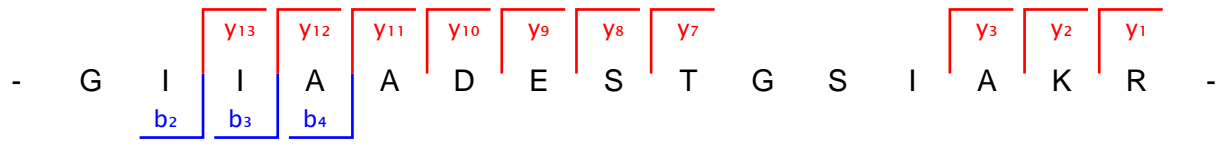

Raw file: 2015-01-05\_CL03\_XenEmb\_x2  
 Scan: 26935 Method: ITMS; HCD Score: 129.54 m/z: 496.94

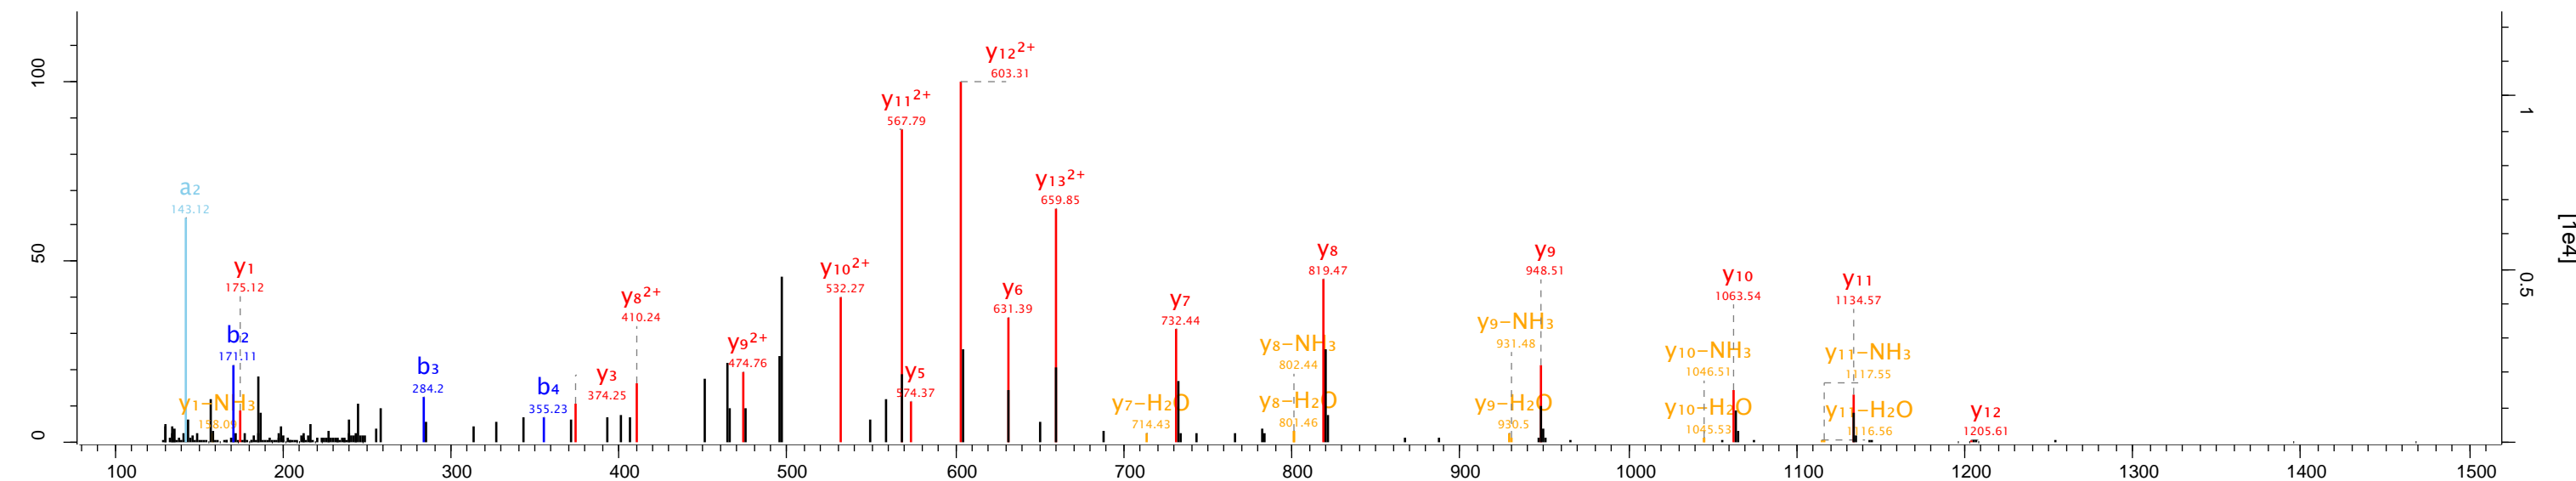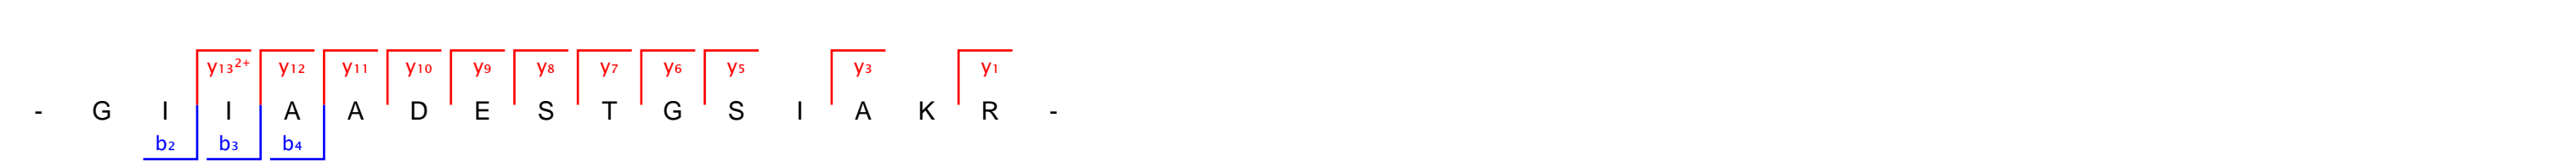

Raw file: 2015-01-05\_CL03\_XenEmb\_x2  
 Scan: 26943 Method: ITMS; HCD Score: 80.37 m/z: 484.94

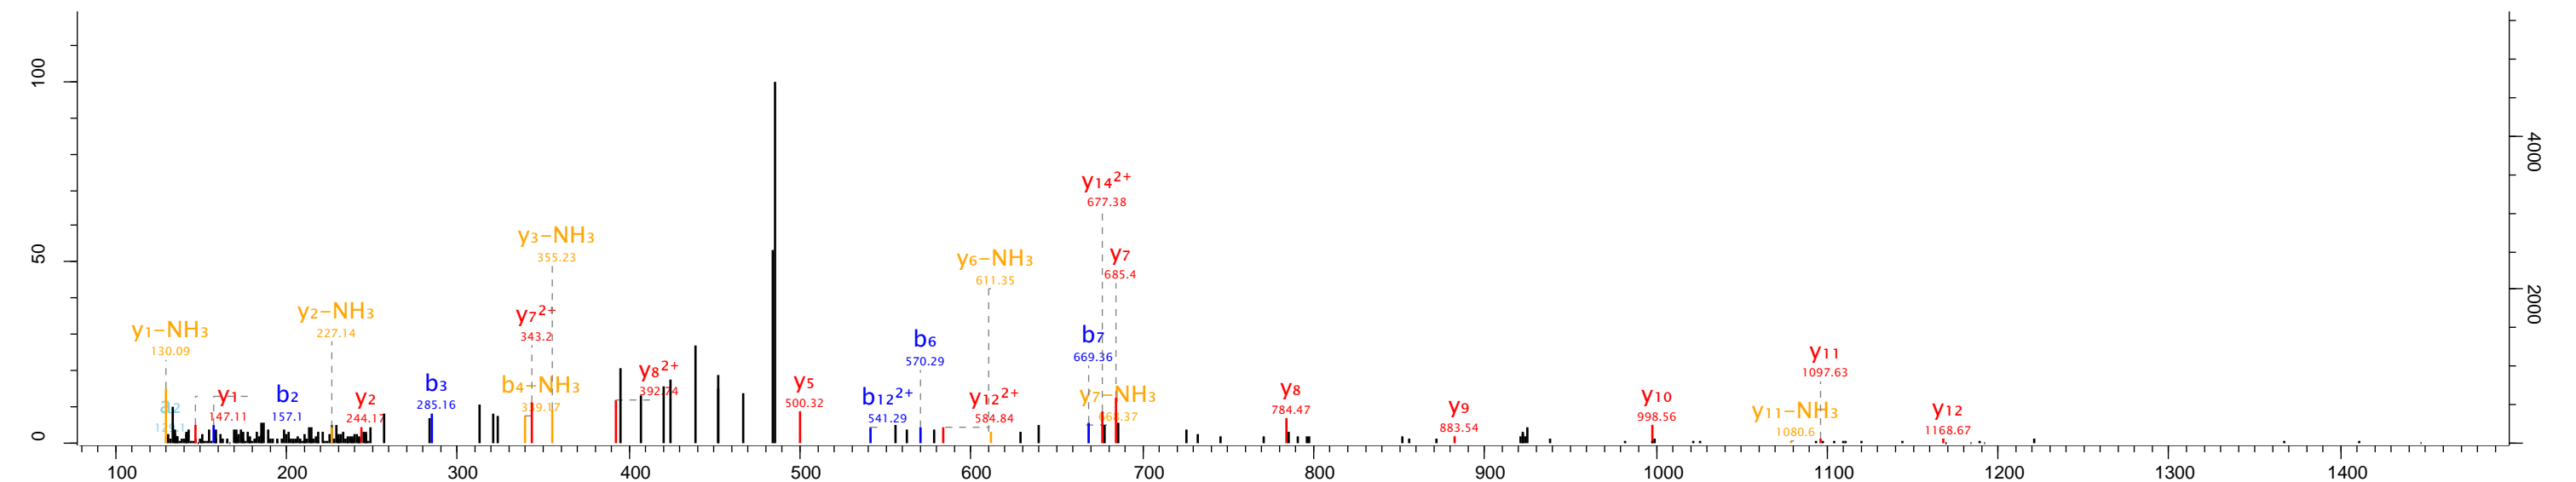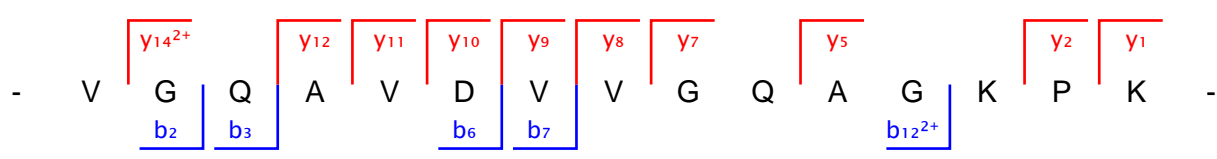

Spectral Annotation for Single-Peptide IDs in 16-cell Embryo using Q-OT-LIT



Raw file 2015-01-05\_CL03\_XenEmb\_x2 Scan 26969 Method ITMS; HCD Score 54.09 m/z 484.94

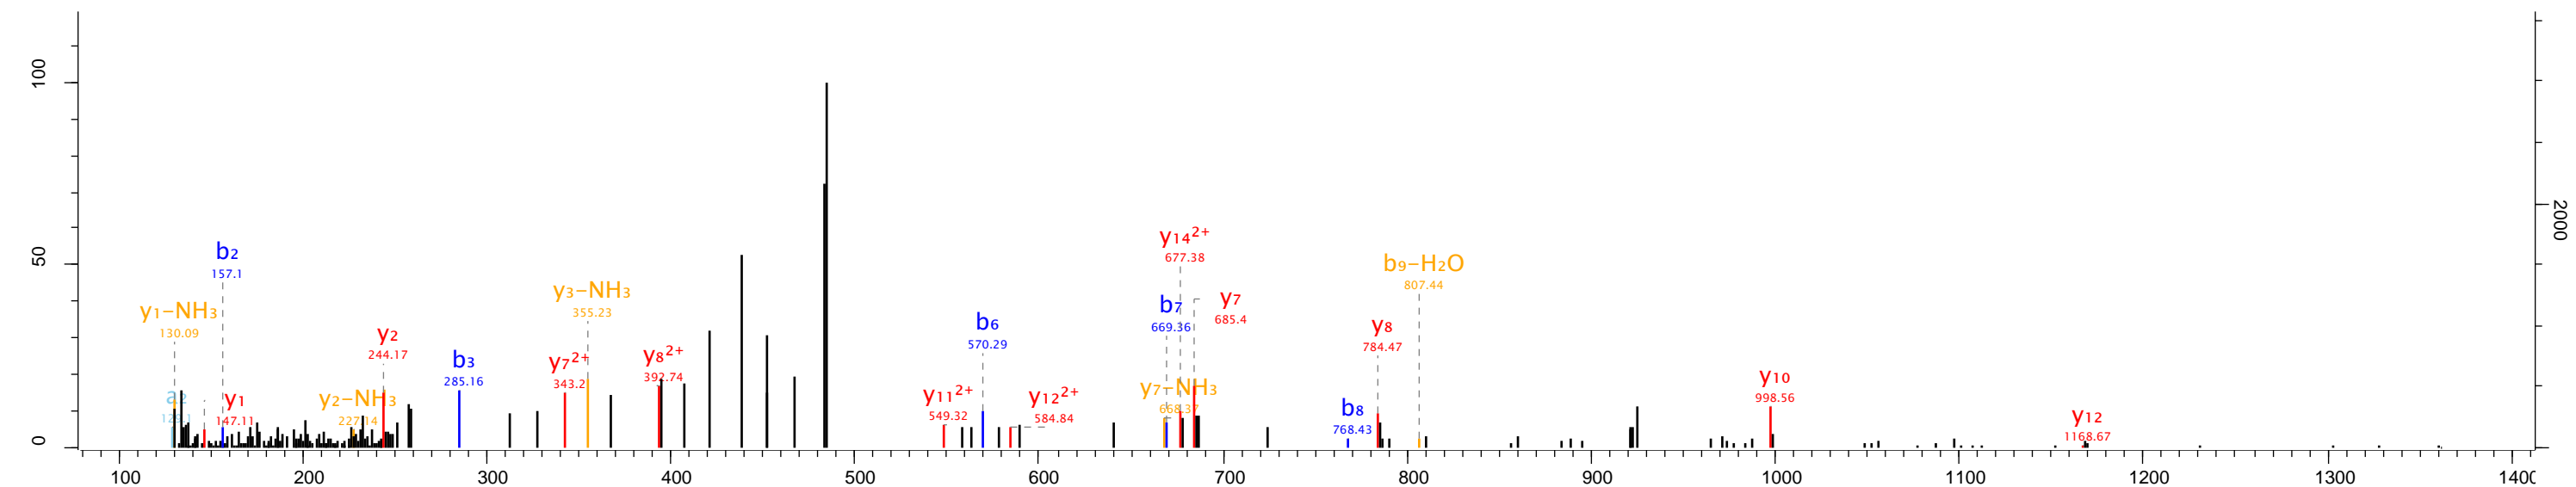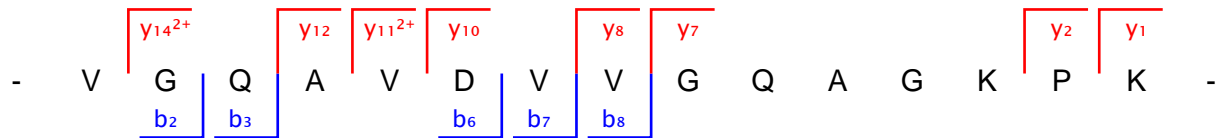

Spectral Annotation for Single-Peptide IDs in 16-cell Embryo using Q-OT-LIT

Raw file: 2015-01-05\_CL03\_XenEmb\_x2  
 Scan: 26983 Method: ITMS; HCD Score: 72.73 m/z: 505.94

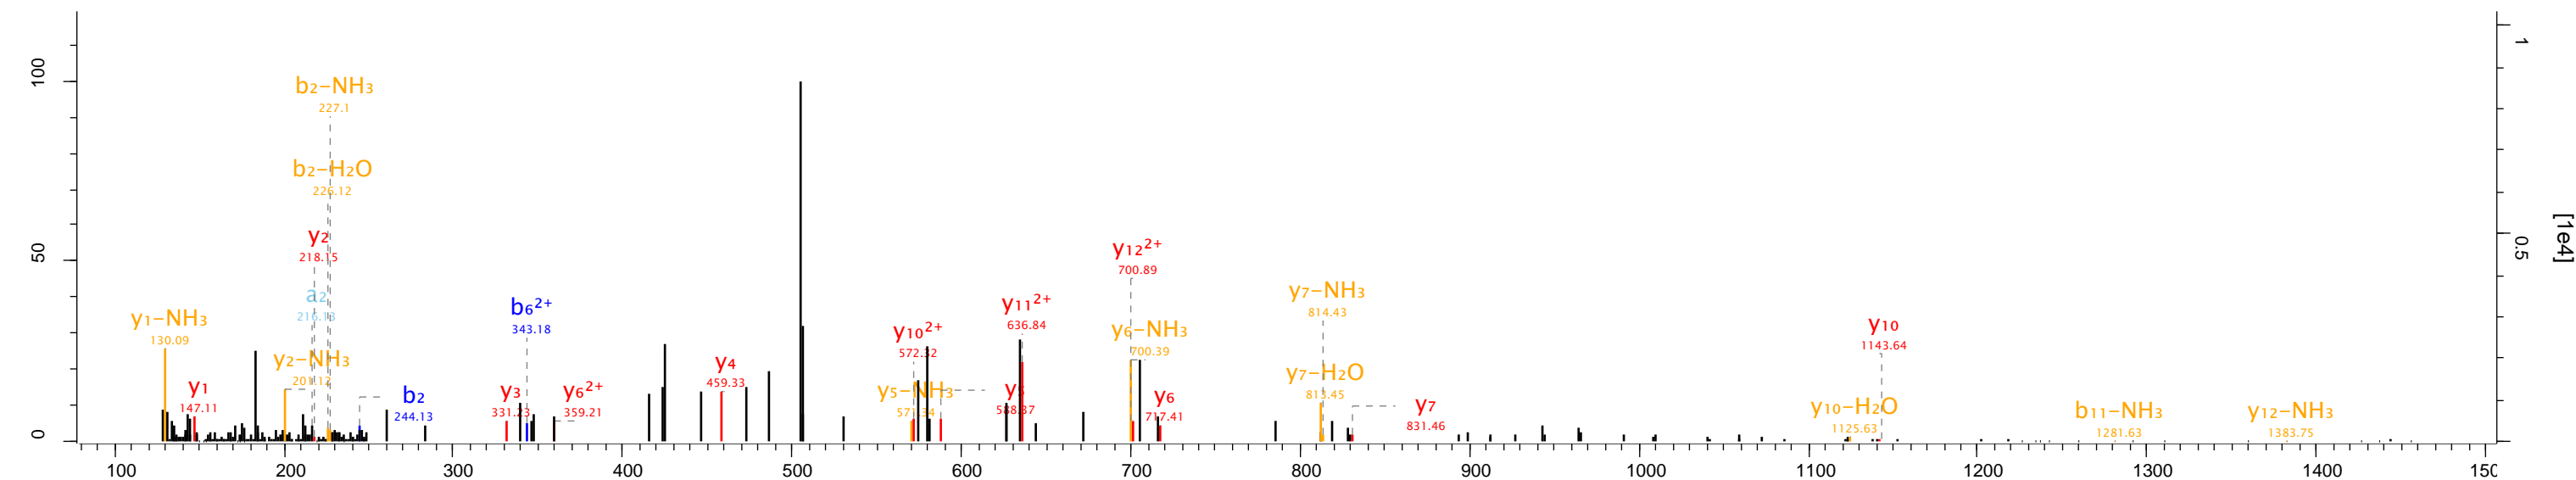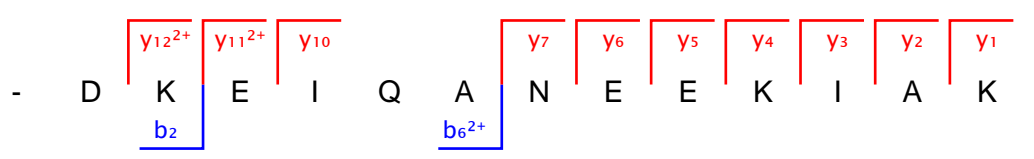

Raw file: 2015-01-05\_CL03\_XenEmb\_x2  
 Scan: 27089  
 Method: ITMS; HCD  
 Score: 44.56  
 m/z: 531.3

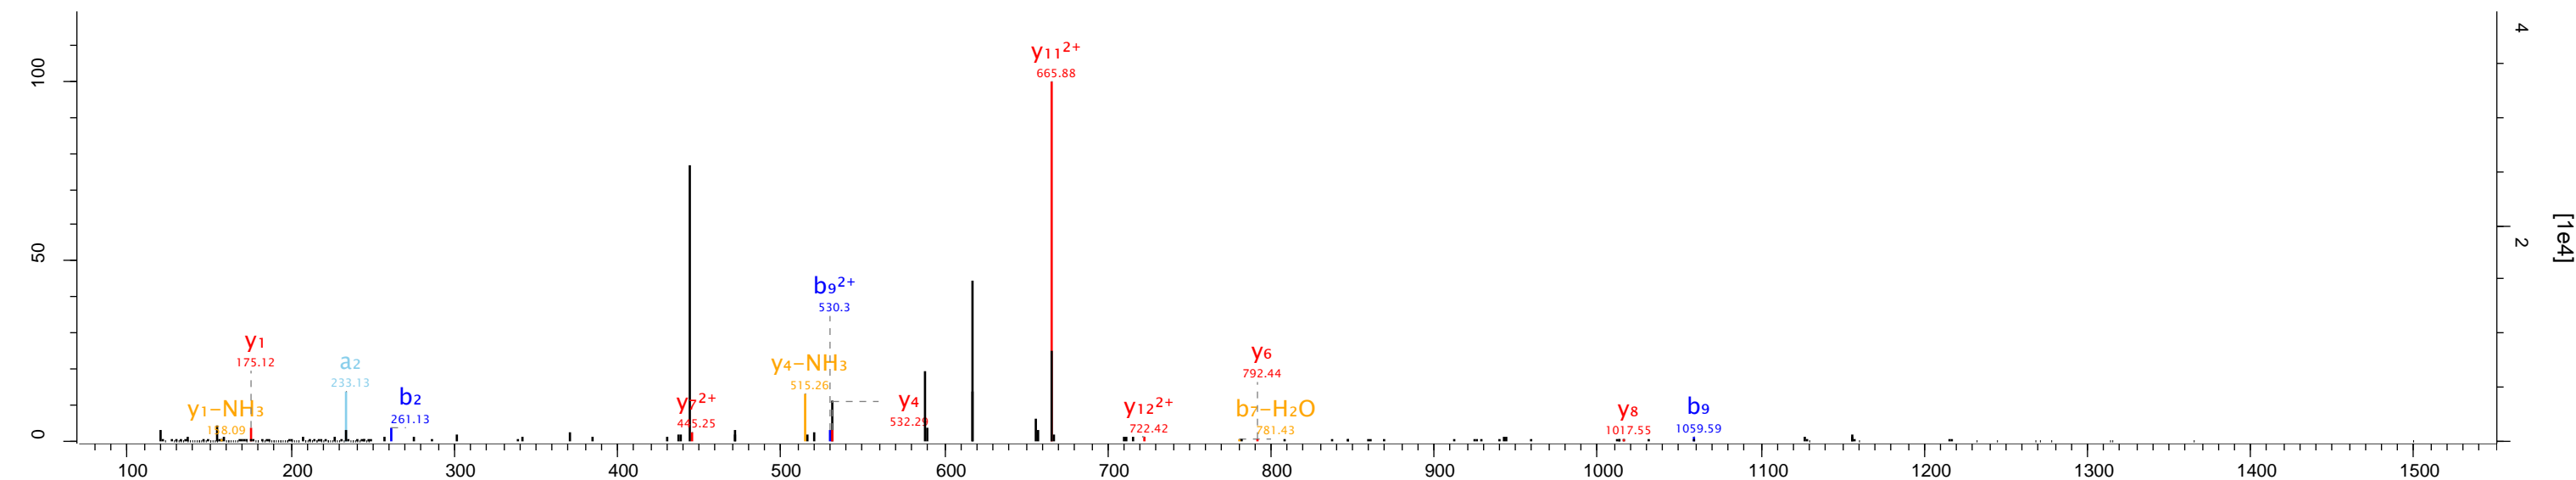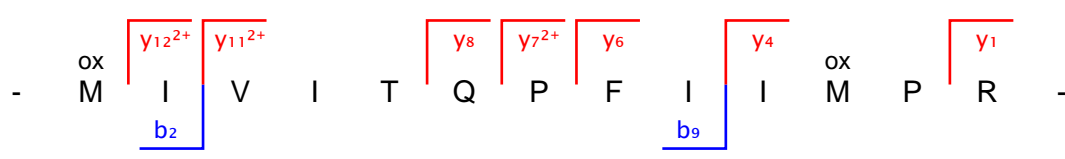

Spectral Annotation for Single-Peptide IDs in 16-cell Embryo using Q-OT-LIT

Raw file 2015-01-05\_CL03\_XenEmb\_x2 Scan 27195 Method ITMS; HCD Score 80.1 m/z 518.6

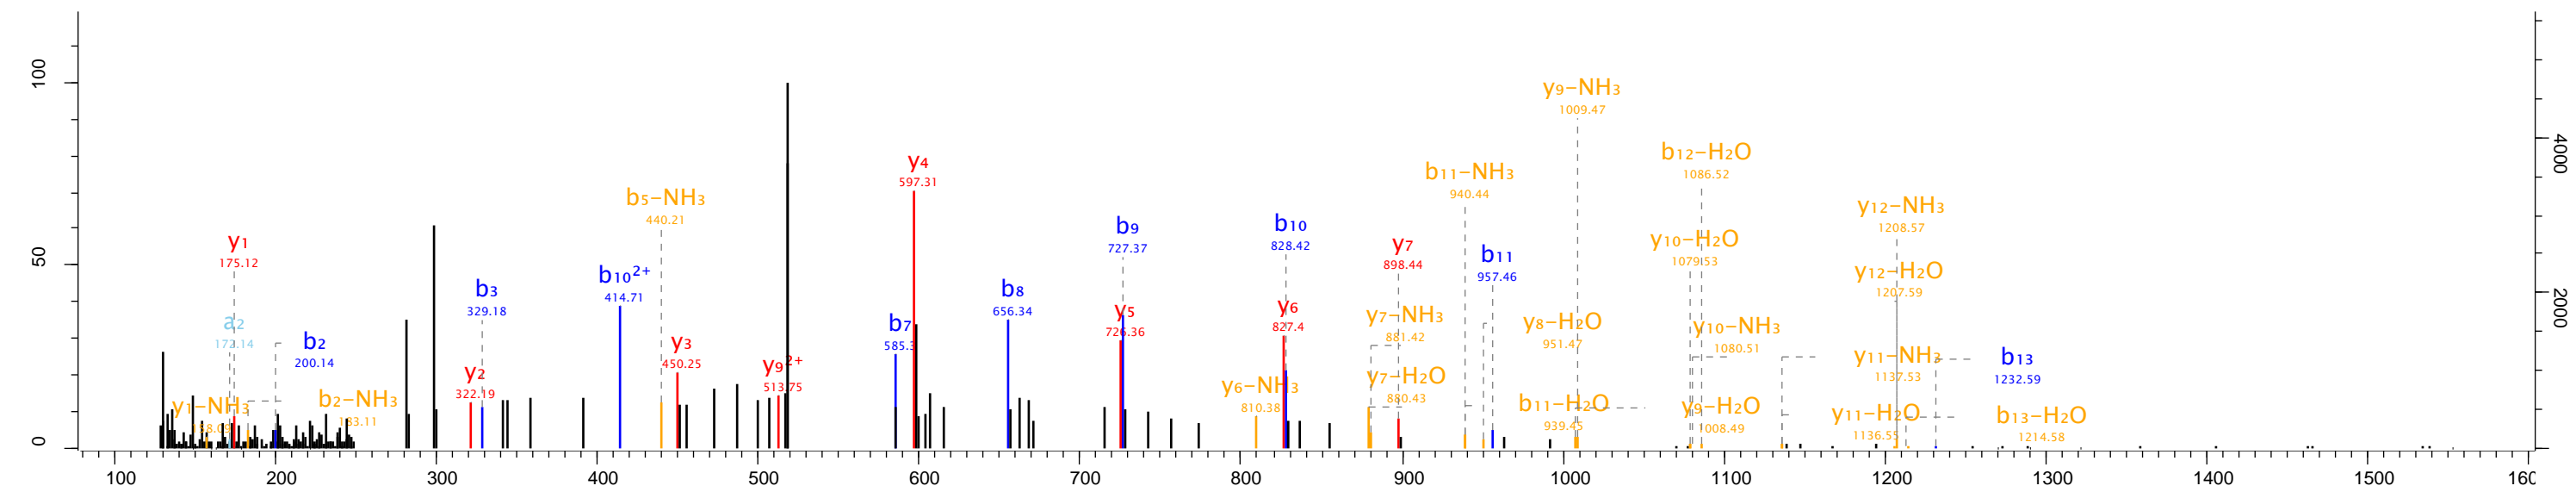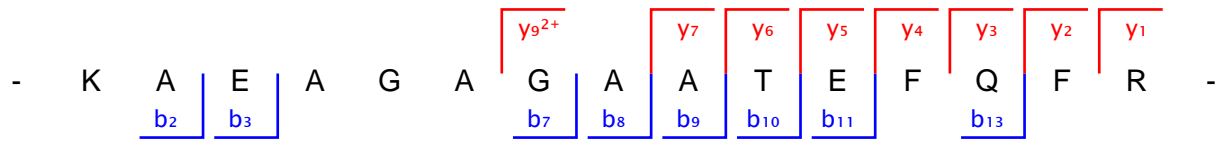

Spectral Annotation for Single-Peptide IDs in 16-cell Embryo using Q-OT-LIT

Raw file: 2015-01-05\_CL03\_XenEmb\_x2  
 Scan: 27290 Method: ITMS; HCD Score: 42.19 m/z: 501.62

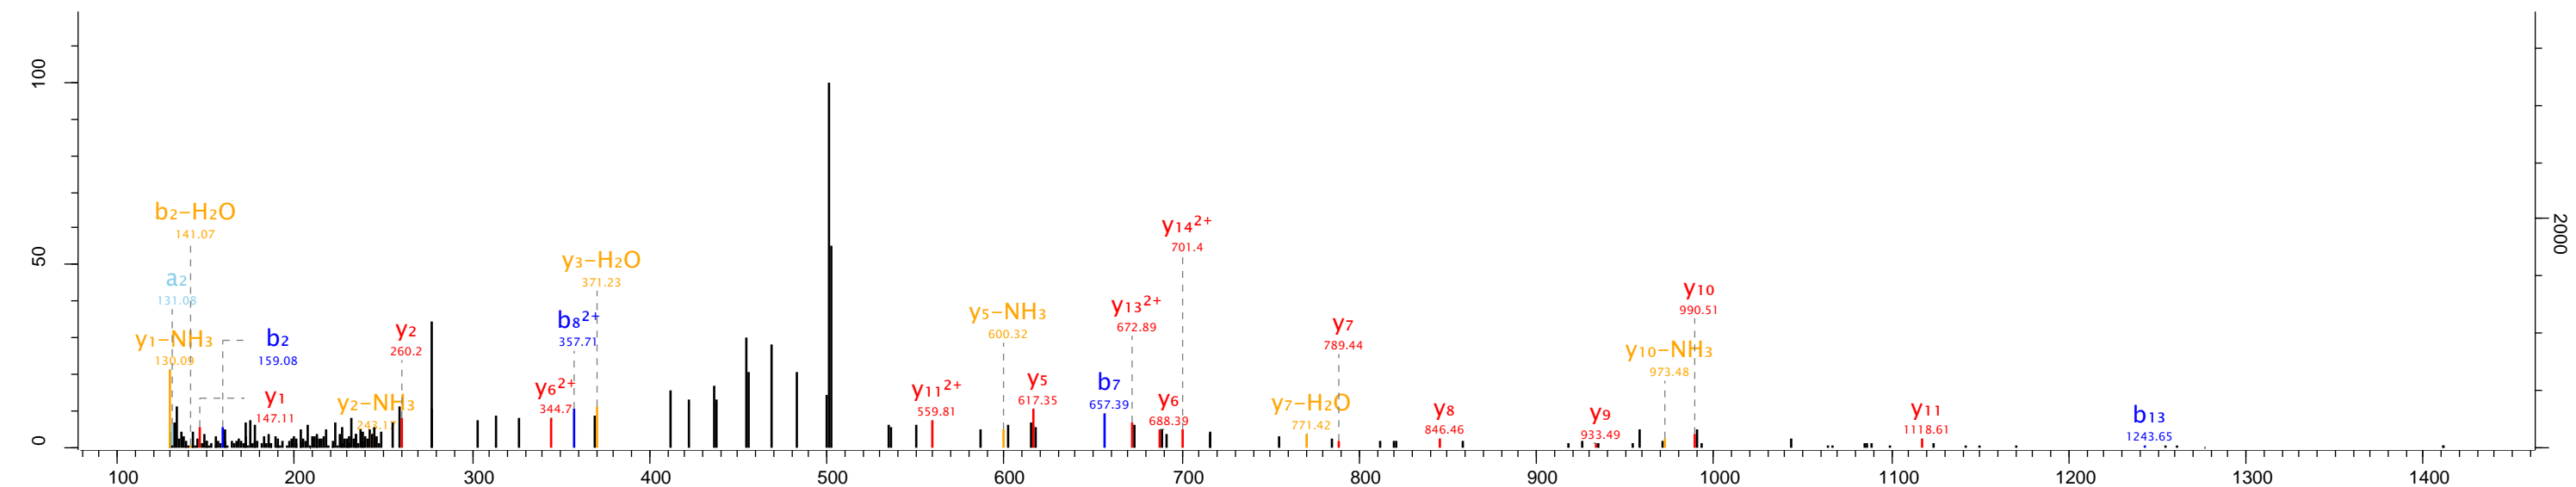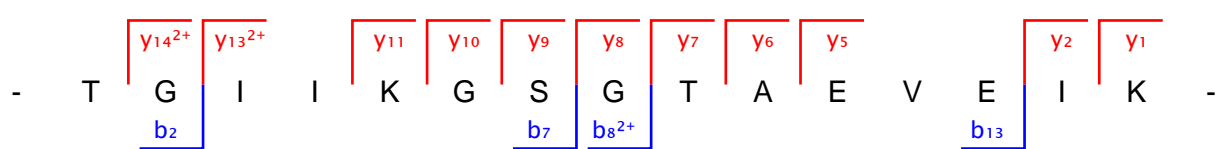

Spectral Annotation for Single-Peptide IDs in 16-cell Embryo using Q-OT-LIT

Raw file: 2015-01-05\_CL03\_XenEmb\_x2  
 Scan: 27340  
 Method: ITMS; HCD  
 Score: 95.2  
 m/z: 775.89

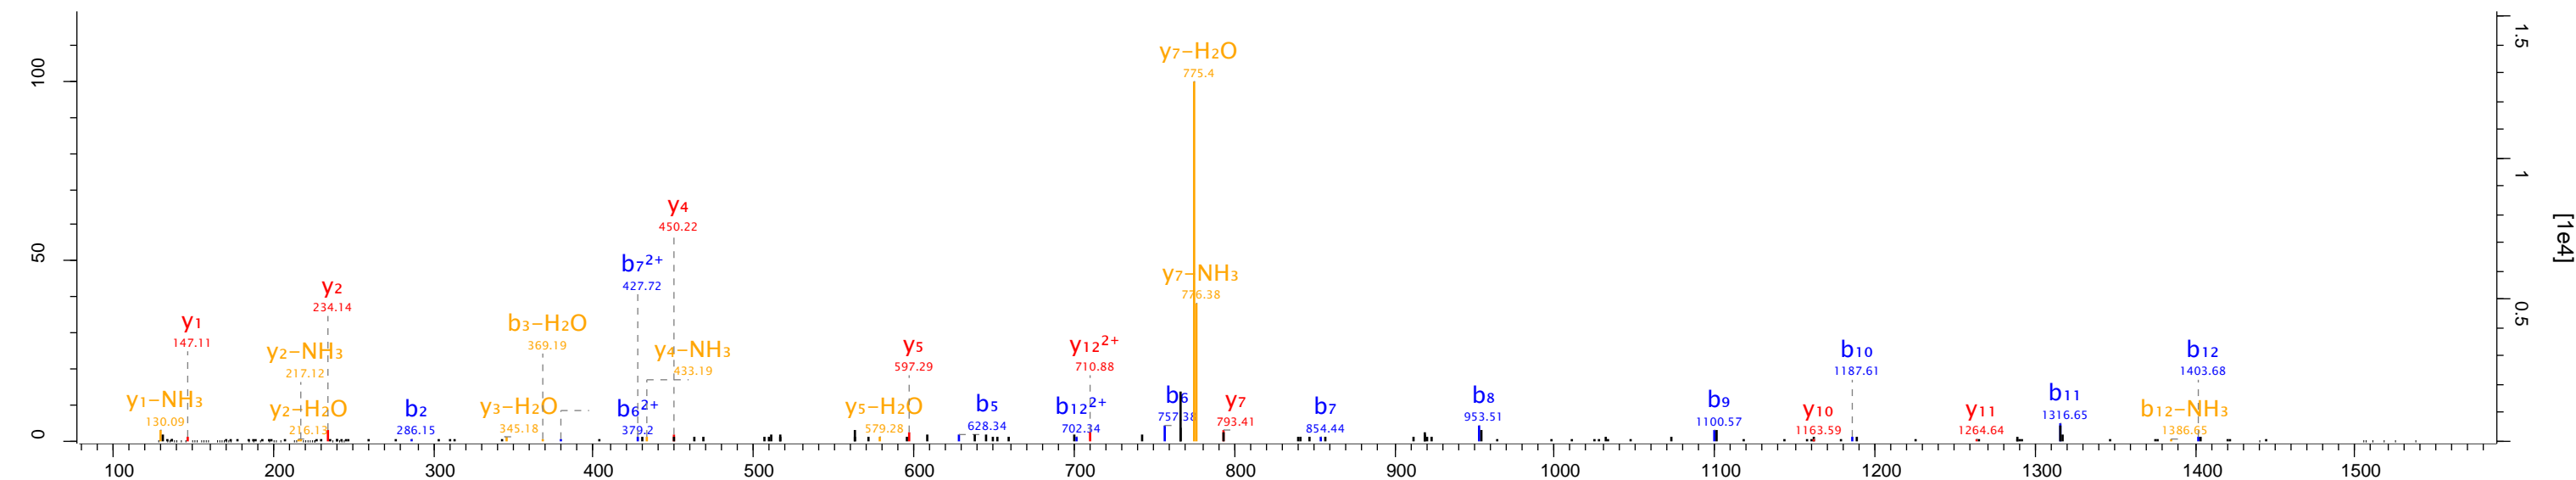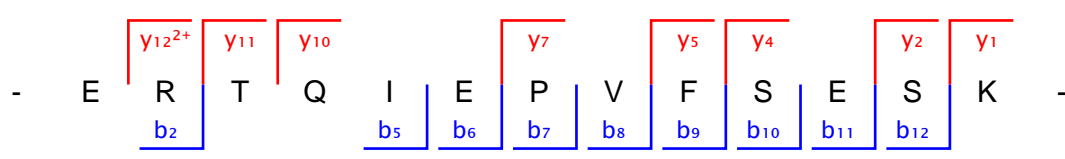

Spectral Annotation for Single-Peptide IDs in 16-cell Embryo using Q-OT-LIT

Raw file: 2015-01-05\_CL03\_XenEmb\_x2  
 Scan: 27362 Method: ITMS; HCD Score: 127.36 m/z: 775.39

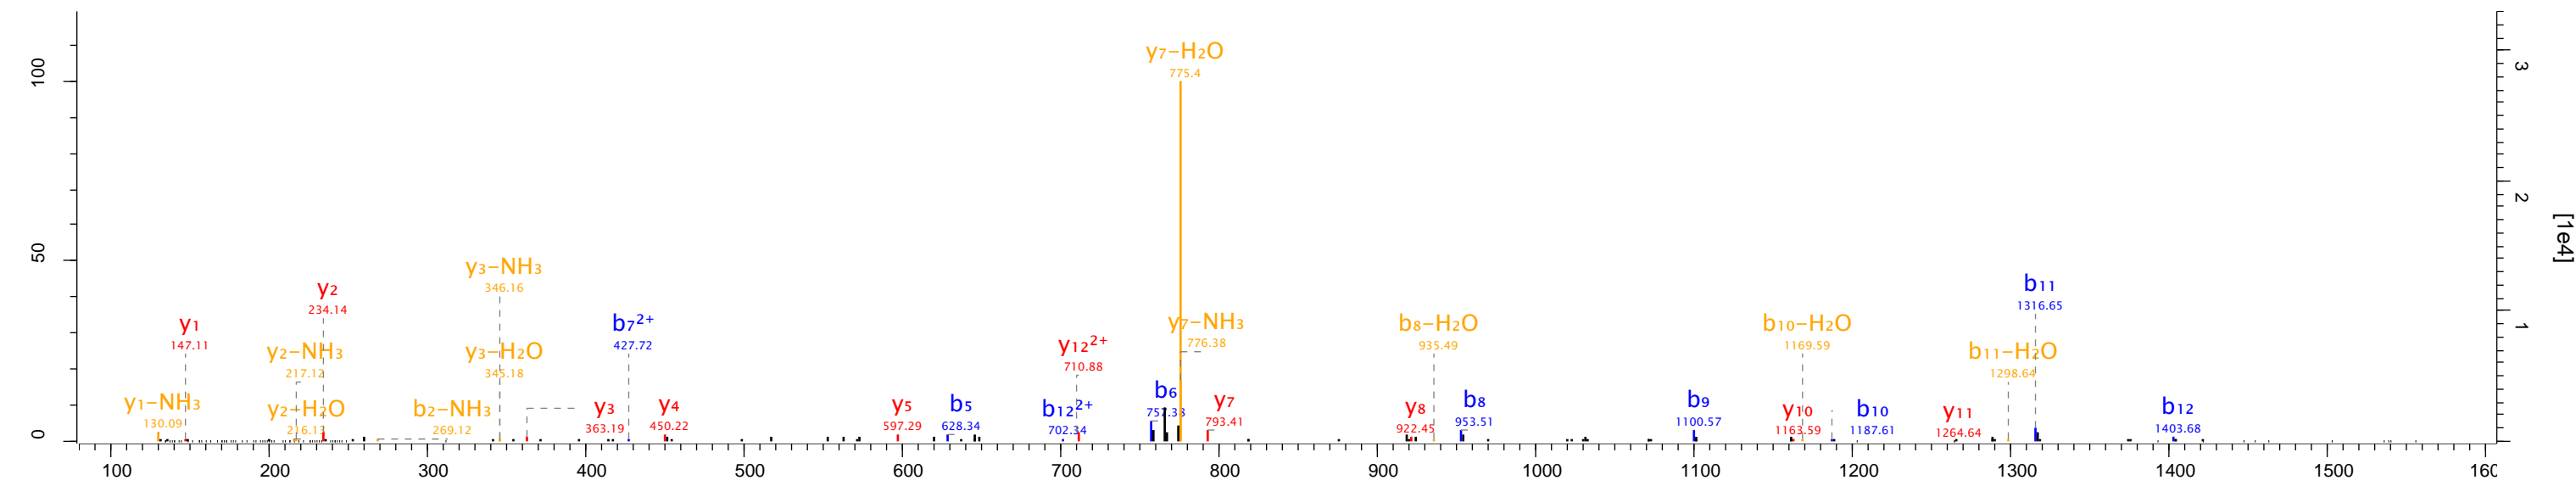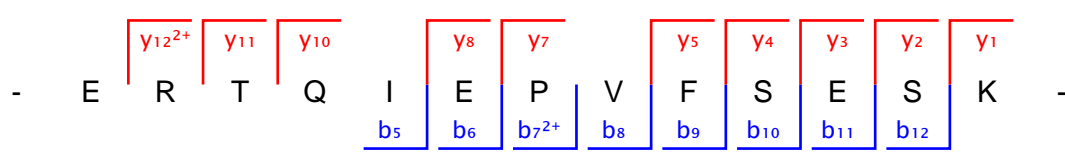

Spectral Annotation for Single-Peptide IDs in 16-cell Embryo using Q-OT-LIT

Raw file 2015-01-05\_CL03\_XenEmb\_x2 Scan 27371 Method ITMS; HCD Score 134.4 m/z 517.26

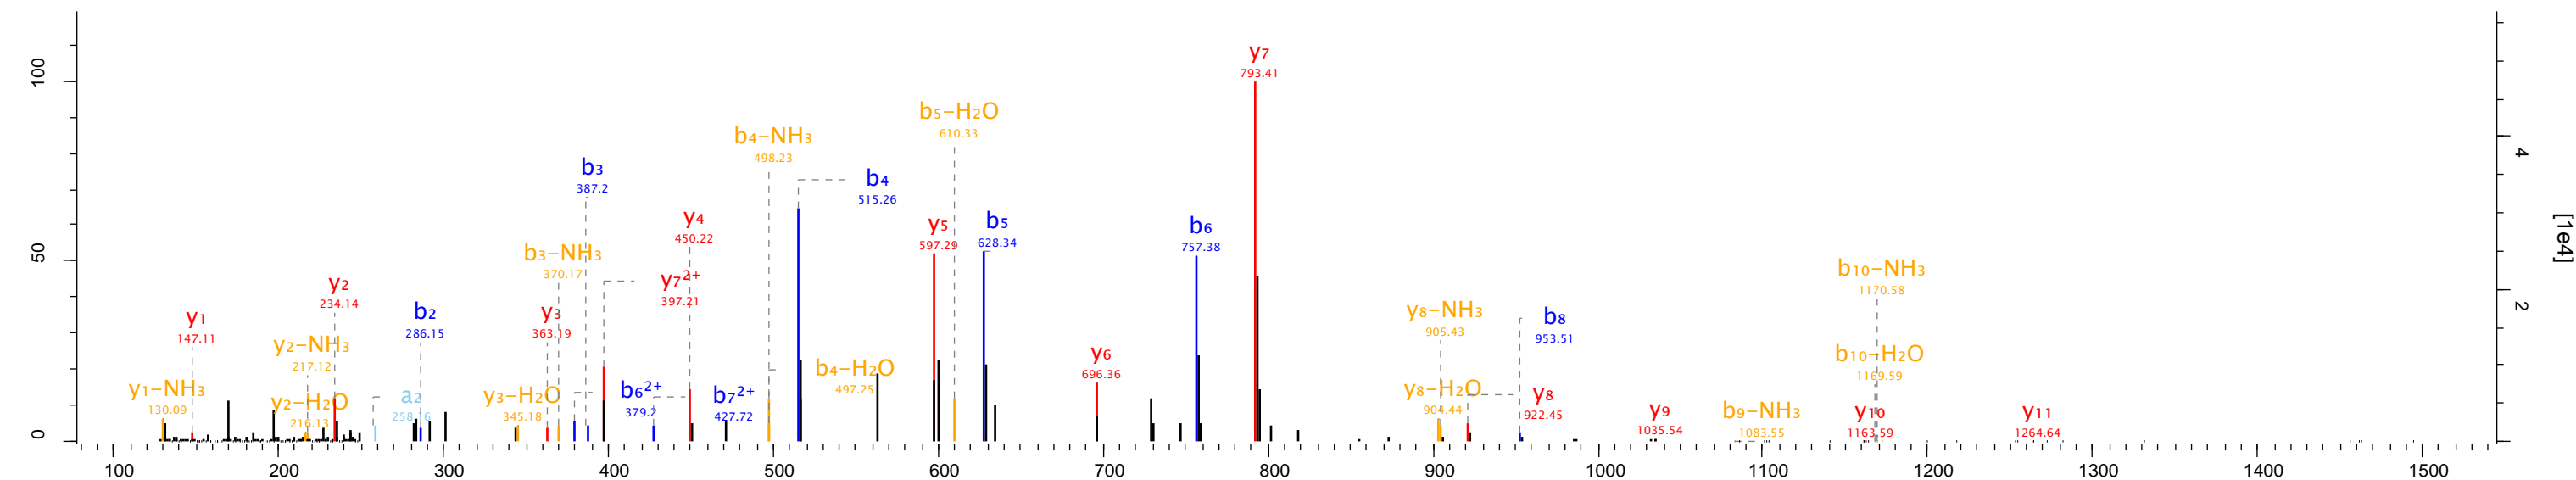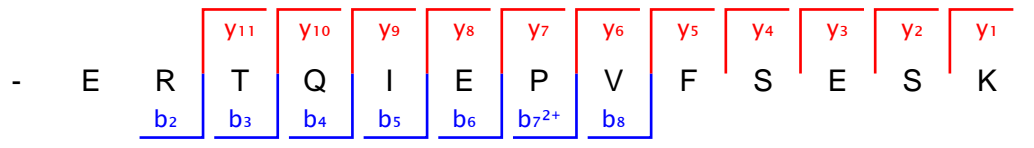

Spectral Annotation for Single-Peptide IDs in 16-cell Embryo using Q-OT-LIT



Raw file 2015-01-05\_CL03\_XenEmb\_x2 Scan 27394 Method ITMS; HCD Score 122.52 m/z 517.26

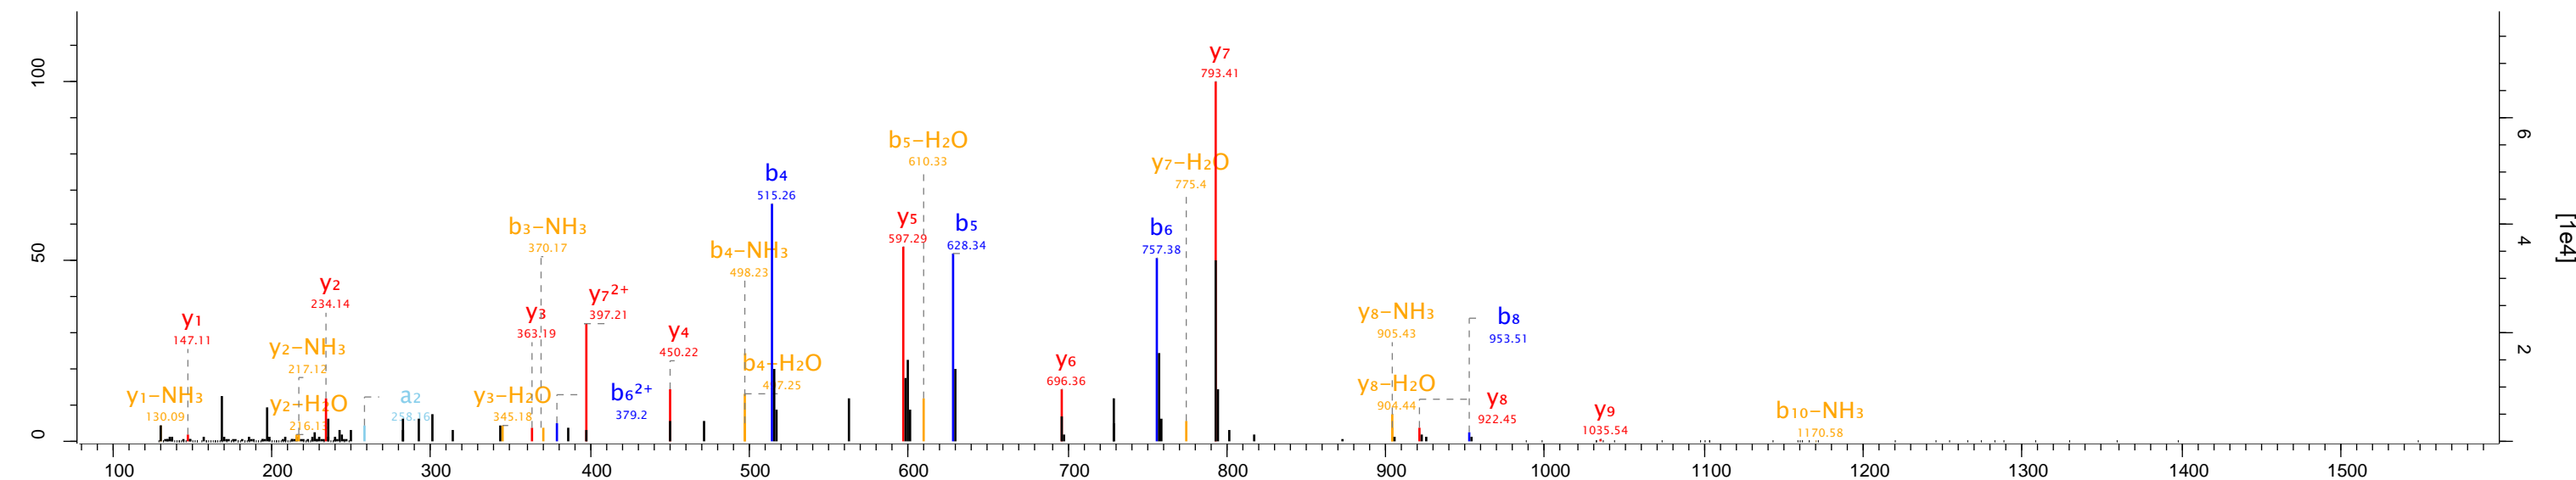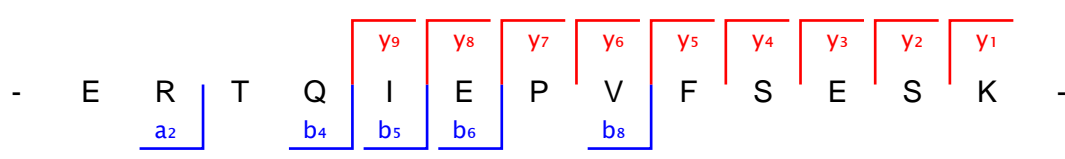

Spectral Annotation for Single-Peptide IDs in 16-cell Embryo using Q-OT-LIT

Raw file: 2015-01-05\_CL03\_XenEmb\_x2  
 Scan: 27418 Method: ITMS; HCD Score: 115.12 m/z: 517.26

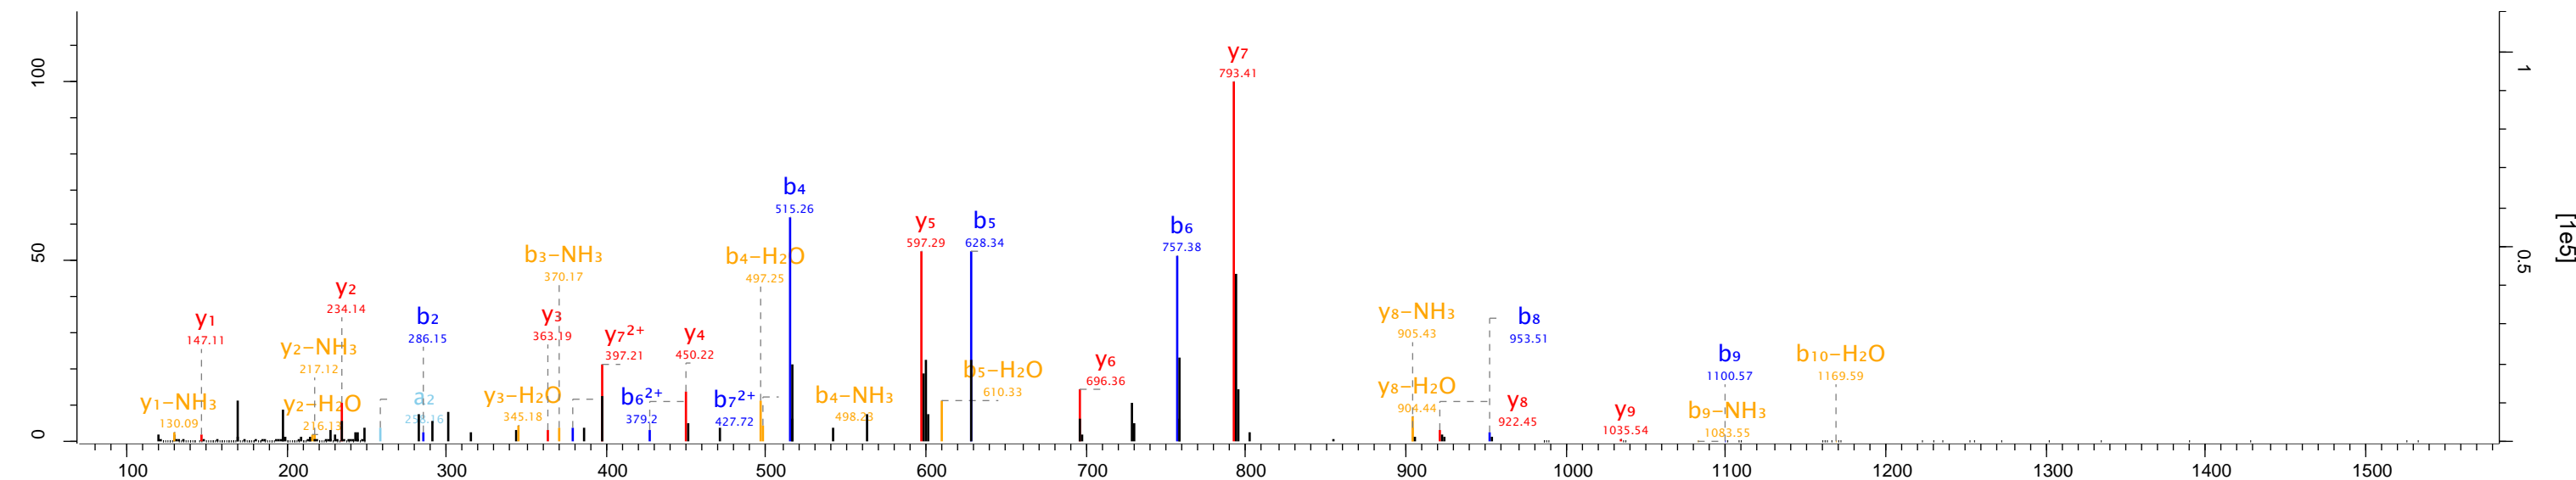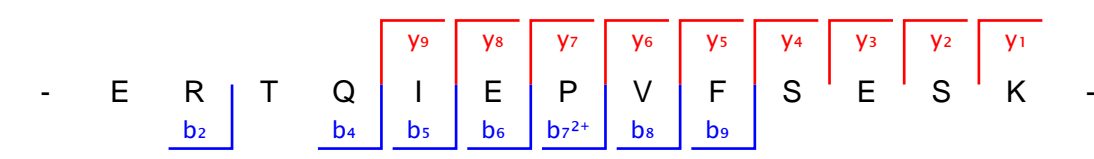

Raw file: 2015-01-05\_CL03\_XenEmb\_x2  
 Scan: 27722 Method: ITMS; HCD Score: 39.07 m/z: 546.98

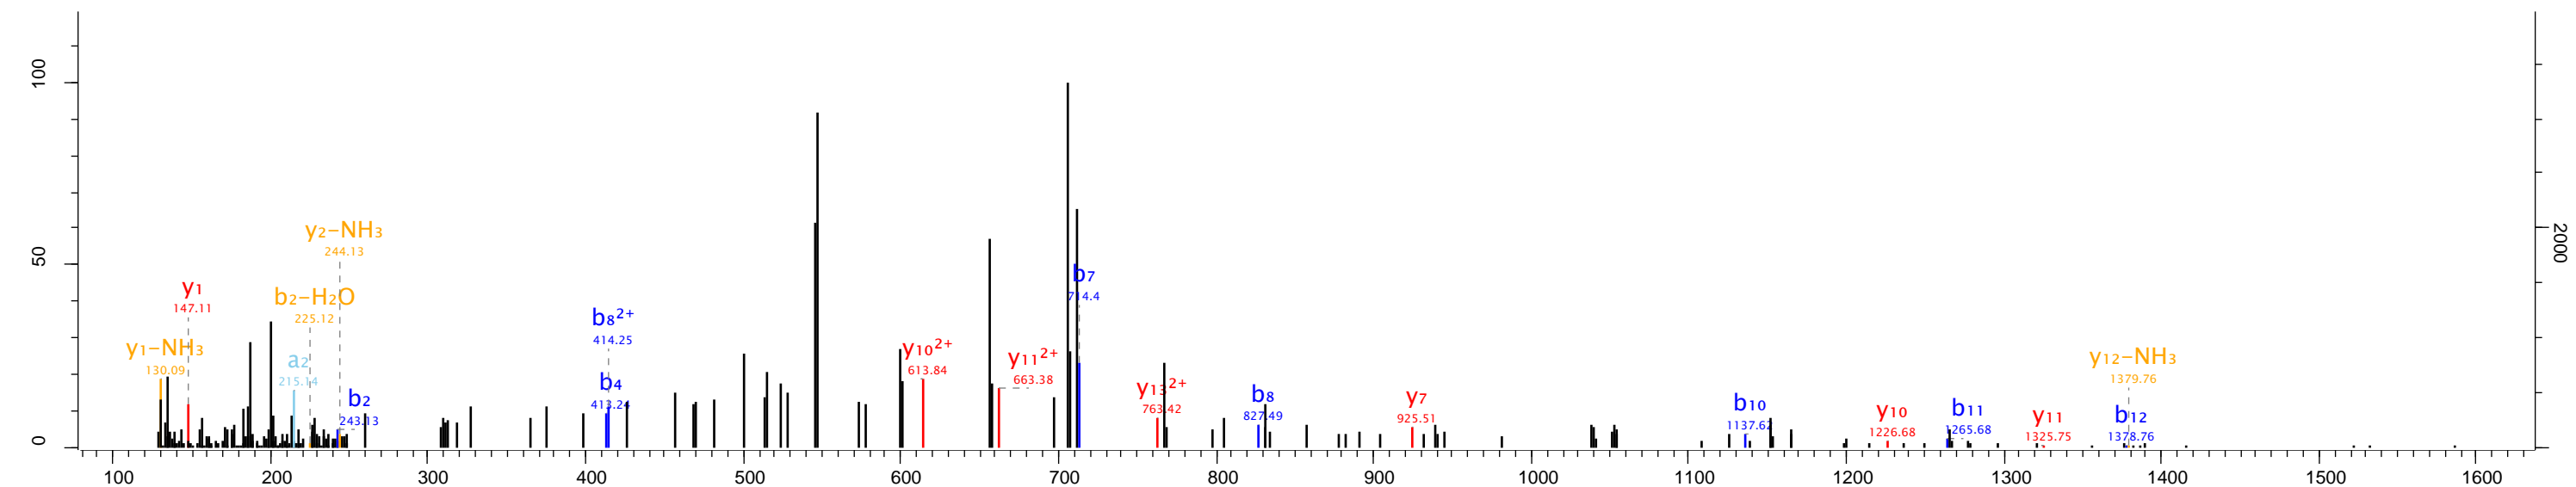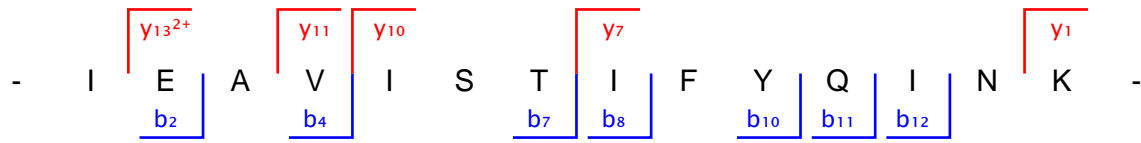

Raw file 2015-01-05\_CL03\_XenEmb\_x2 Scan 27730 Method ITMS; HCD Score 115.49 m/z 401.24

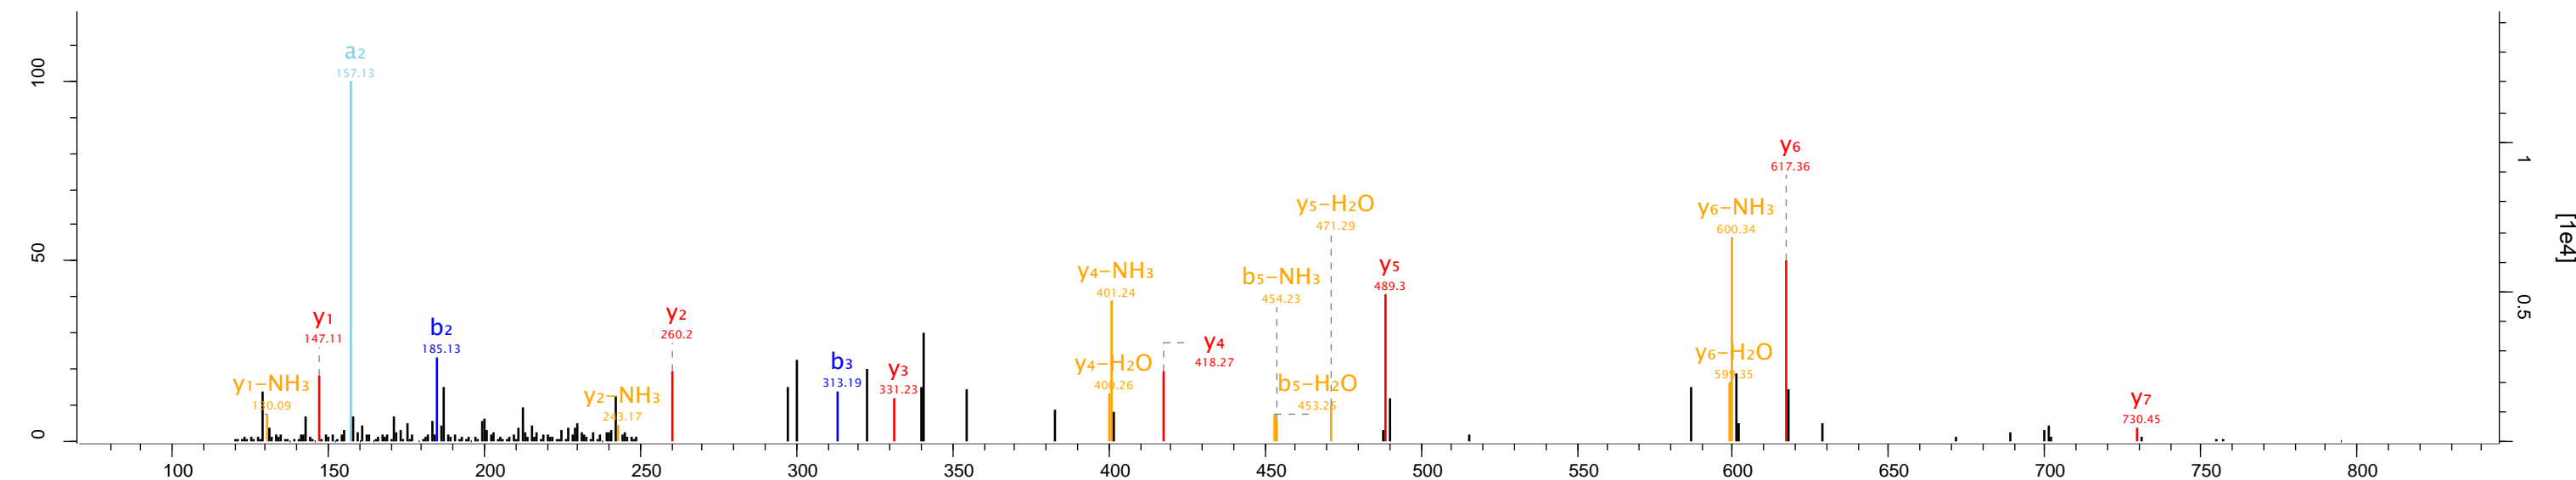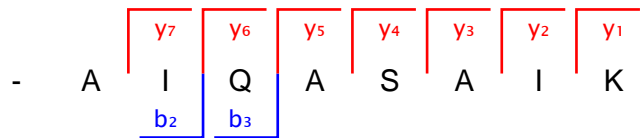

Raw file 2015-01-05\_CL03\_XenEmb\_x2 Scan 27746 Method ITMS; HCD Score 114.28 m/z 401.24

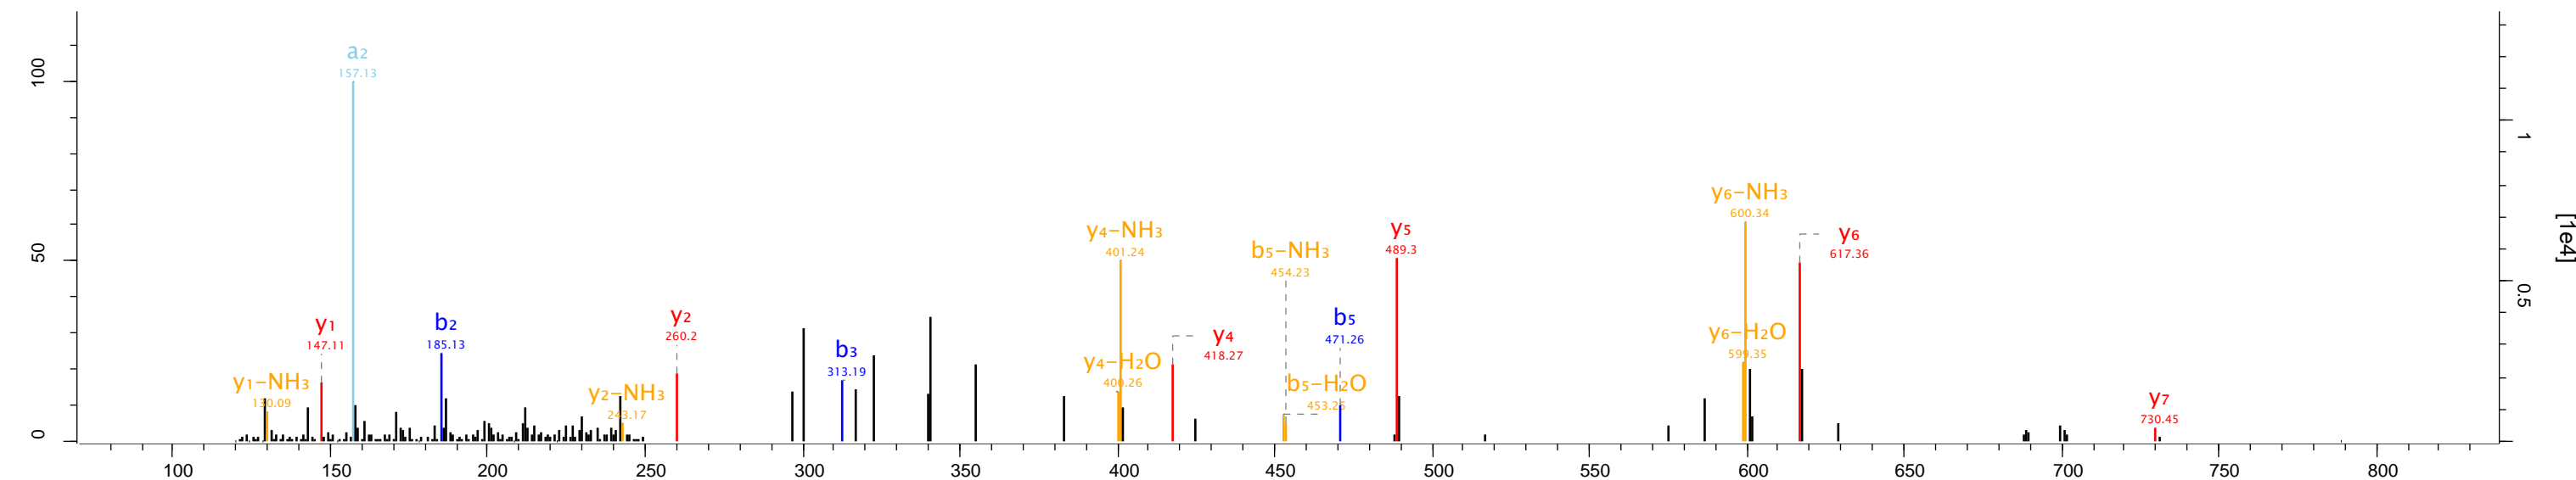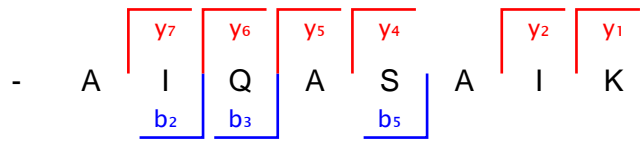

Raw file 2015-01-05\_CL03\_XenEmb\_x2 Scan 27769 Method ITMS; HCD Score 56.41 m/z 564.61

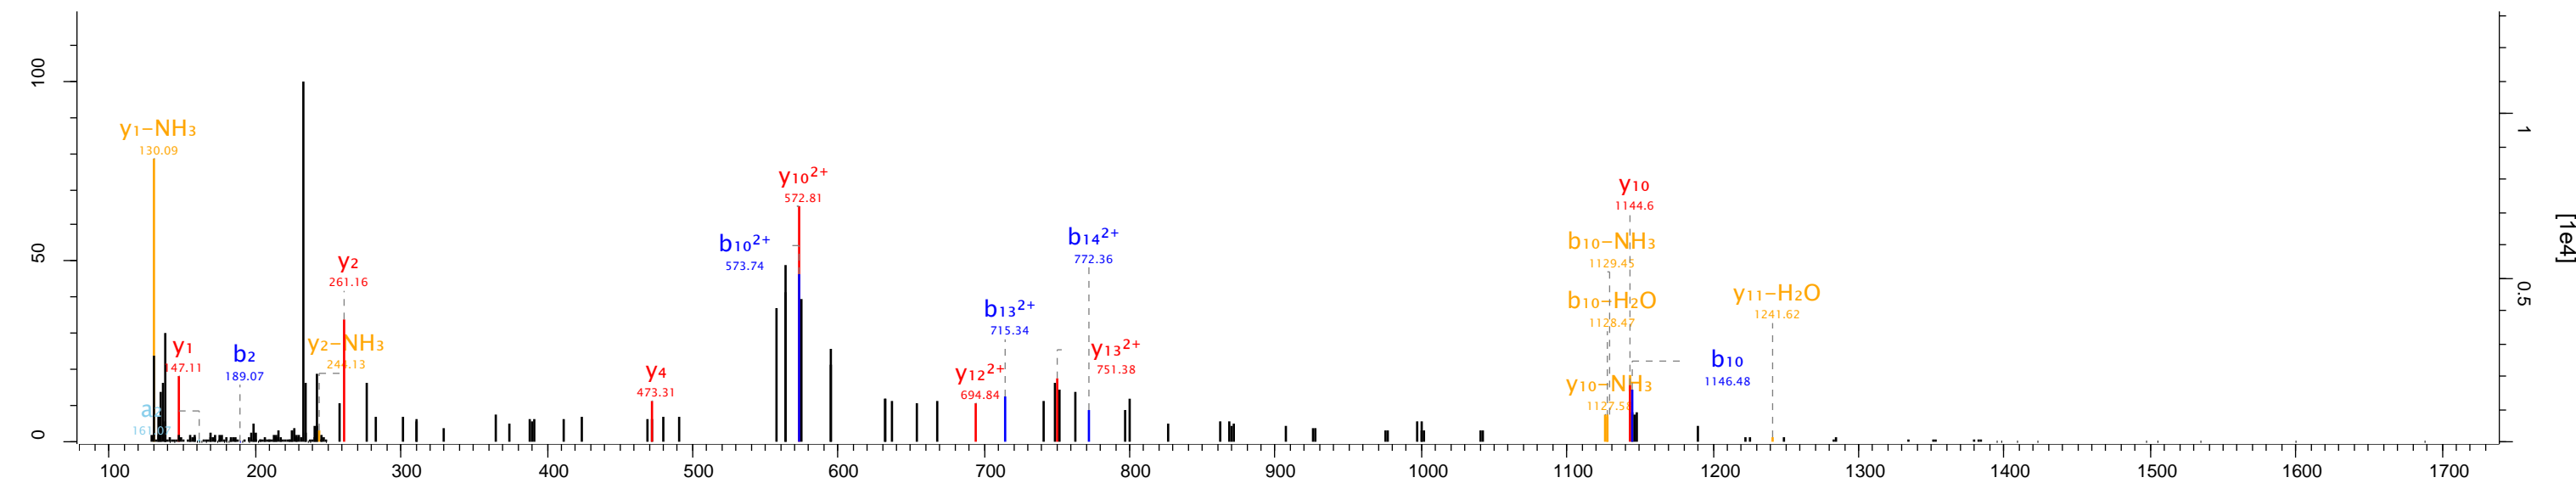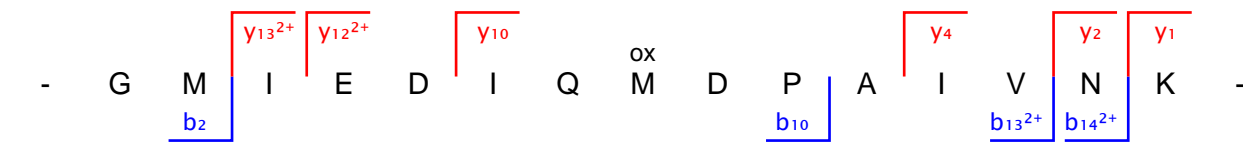

Spectral Annotation for Single-Peptide IDs in 16-cell Embryo using Q-OT-LIT

C. Lombard-Banek, S. Reddy, S. A. Moody, P. Nemes, Mol. Cell. Prot. 2016

Raw file 2015-01-05\_CL03\_XenEmb\_x2 Scan 27791 Method ITMS; HCD Score 60.16 m/z 546.97

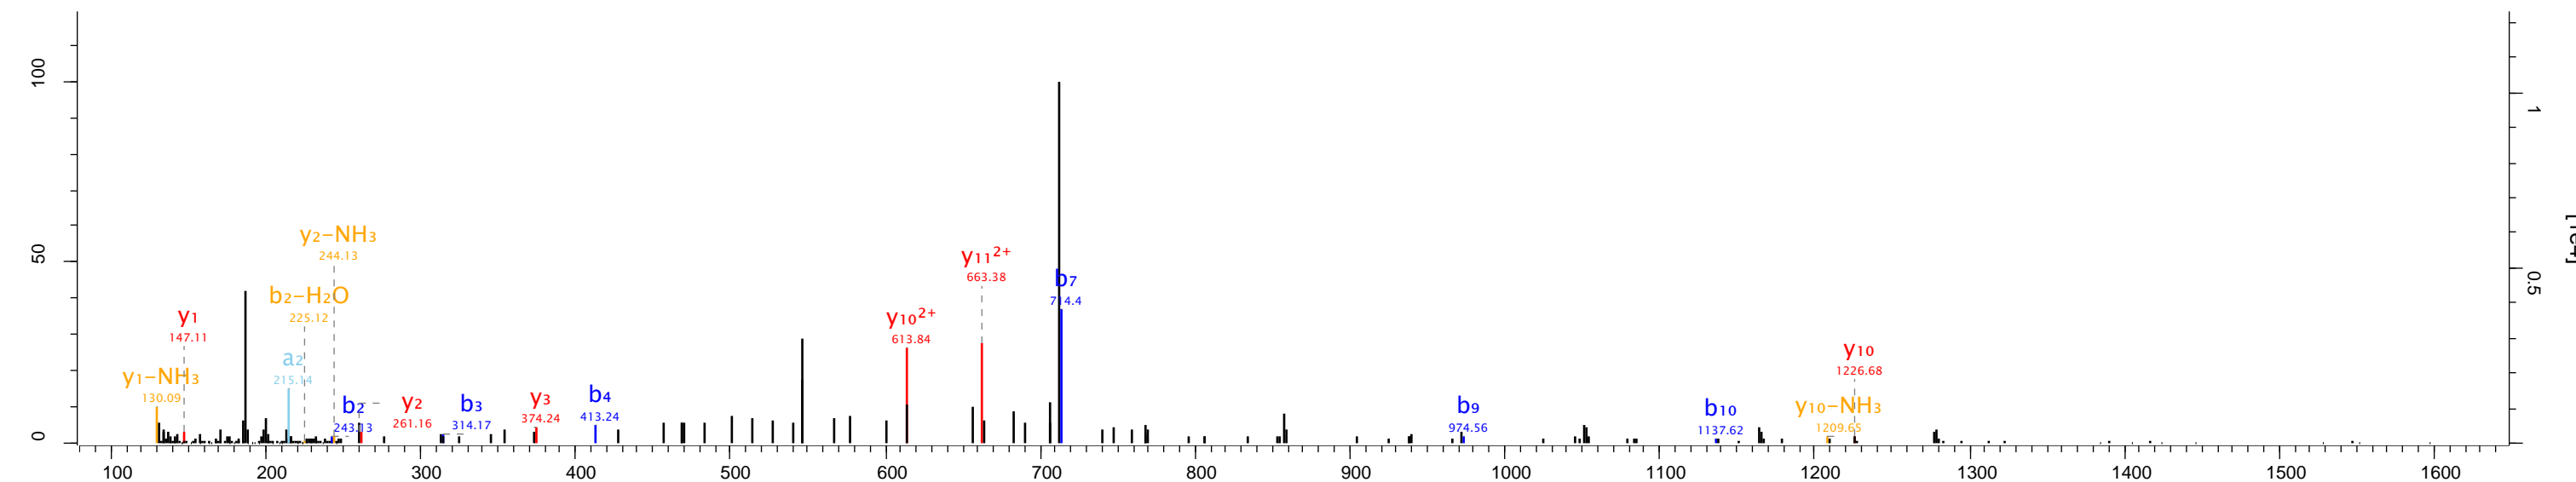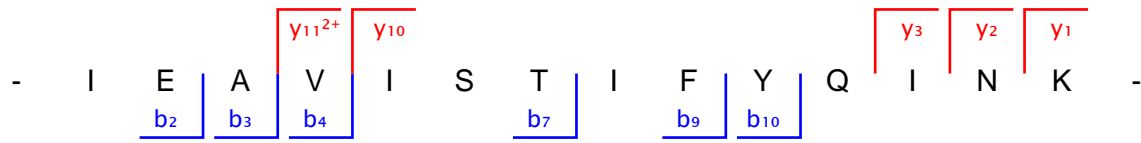

Spectral Annotation for Single-Peptide IDs in 16-cell Embryo using Q-OT-LIT

Raw file: 2015-01-05\_CL03\_XenEmb\_x2  
 Scan: 27830 Method: ITMS; HCD Score: 42.78 m/z: 547.31

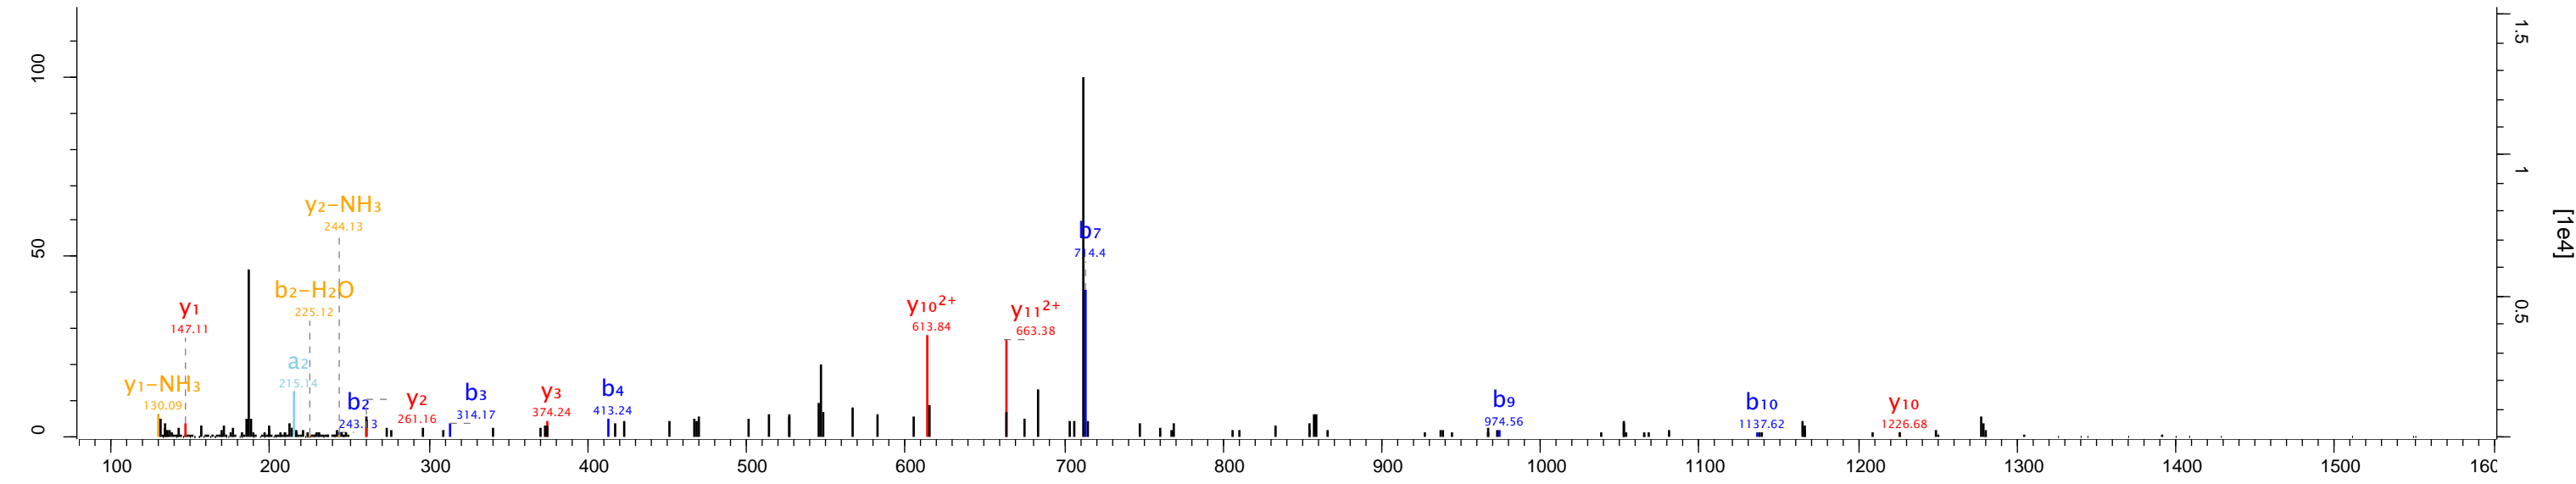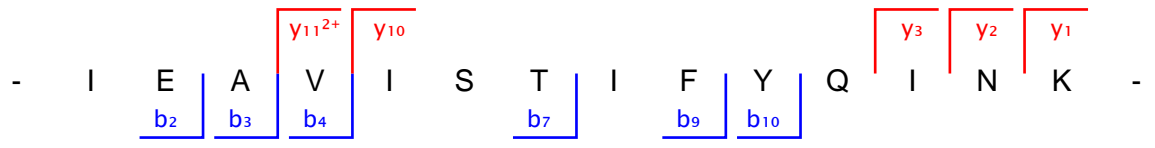

Spectral Annotation for Single-Peptide IDs in 16-cell Embryo using Q-OT-LIT



Raw file  
 2015-01-05\_CL03\_XenEmb\_x2  
 Scan 27879 Method ITMS; HCD Score 42.47 m/z 564.28

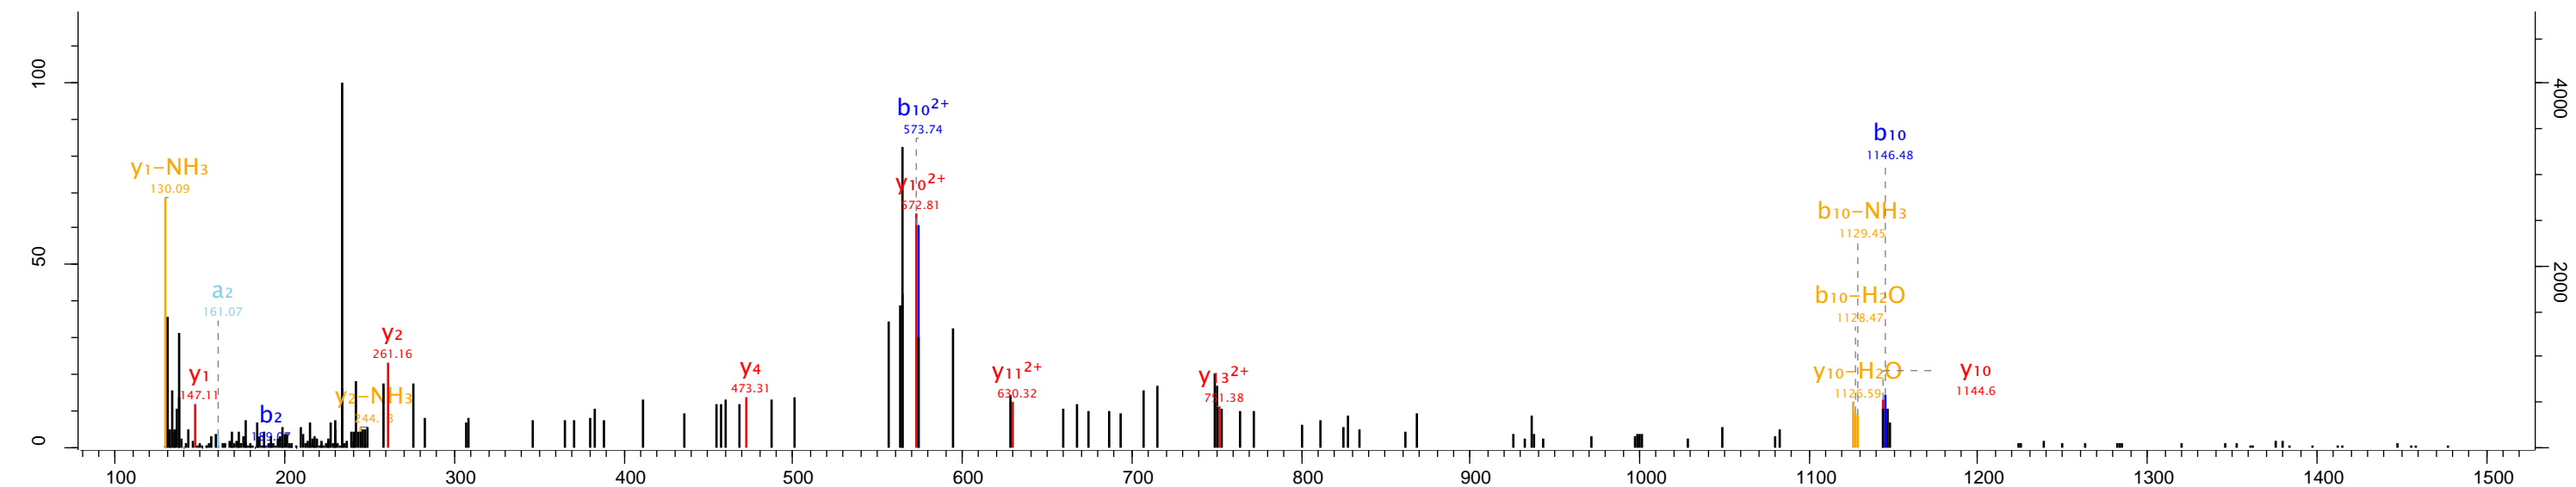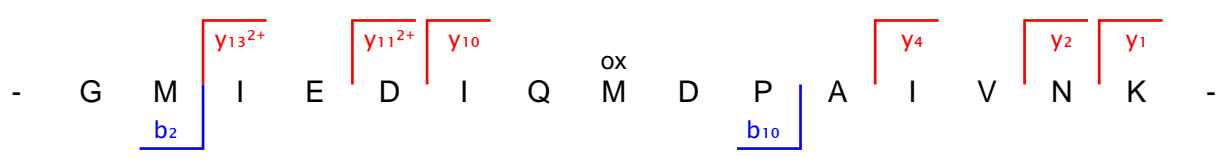

Spectral Annotation for Single-Peptide IDs in 16-cell Embryo using Q-OT-LIT

Raw file 2015-01-05\_CL03\_XenEmb\_x2 Scan 27980 Method ITMS; HCD Score 42.68 m/z 554.31

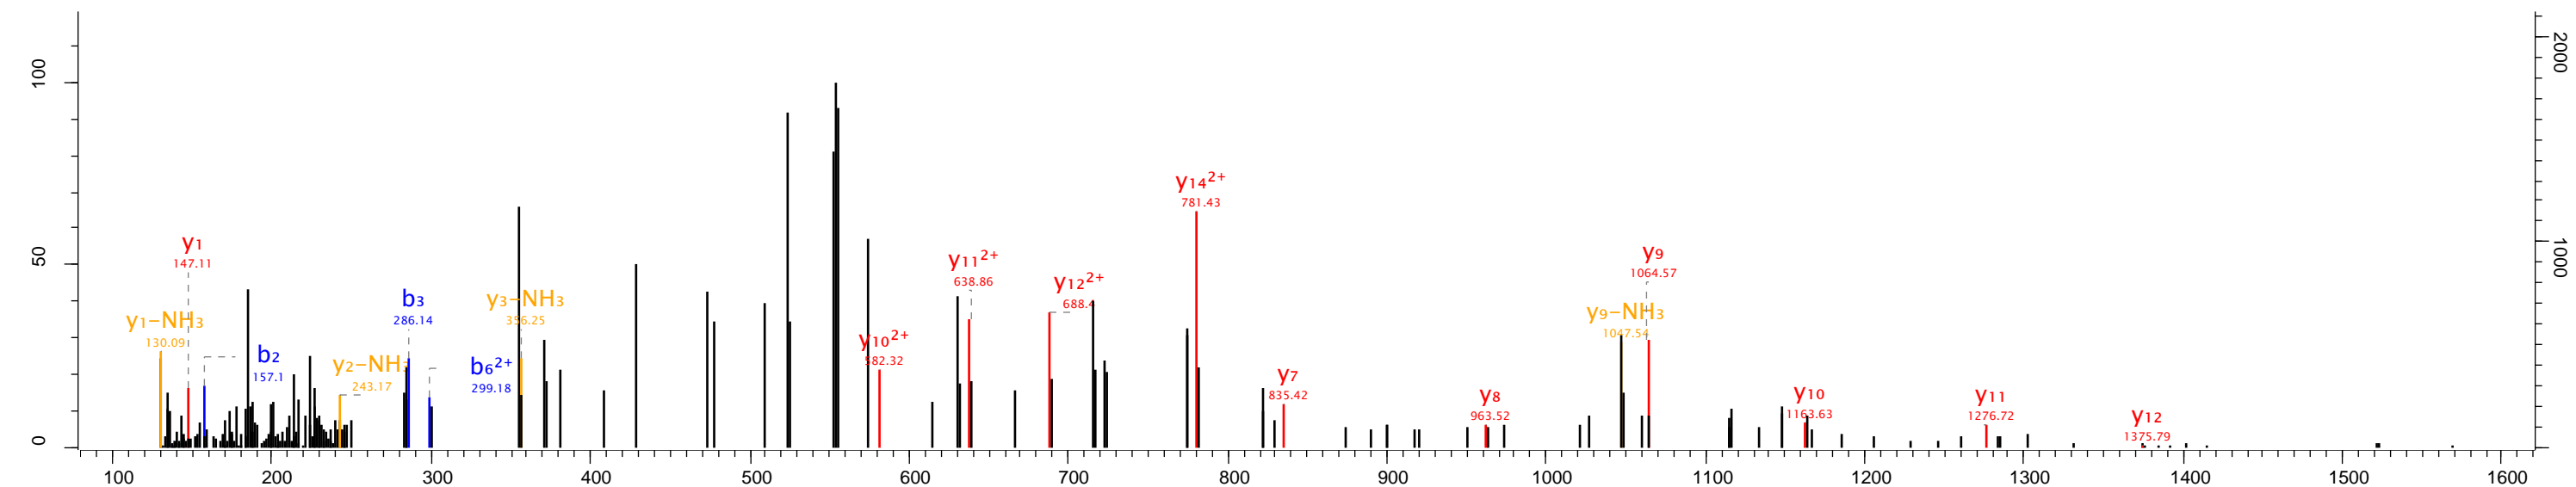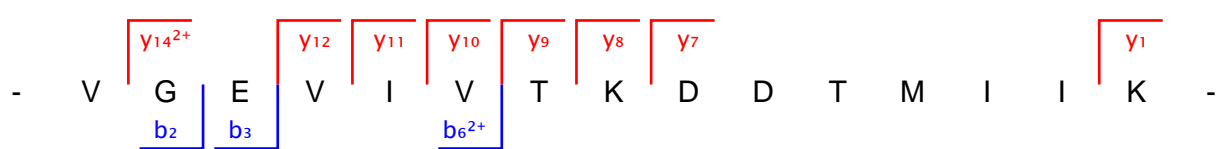

Raw file 2015-01-05\_CL03\_XenEmb\_x2 Scan 28035 Method ITMS; HCD Score 93.24 m/z 554.31

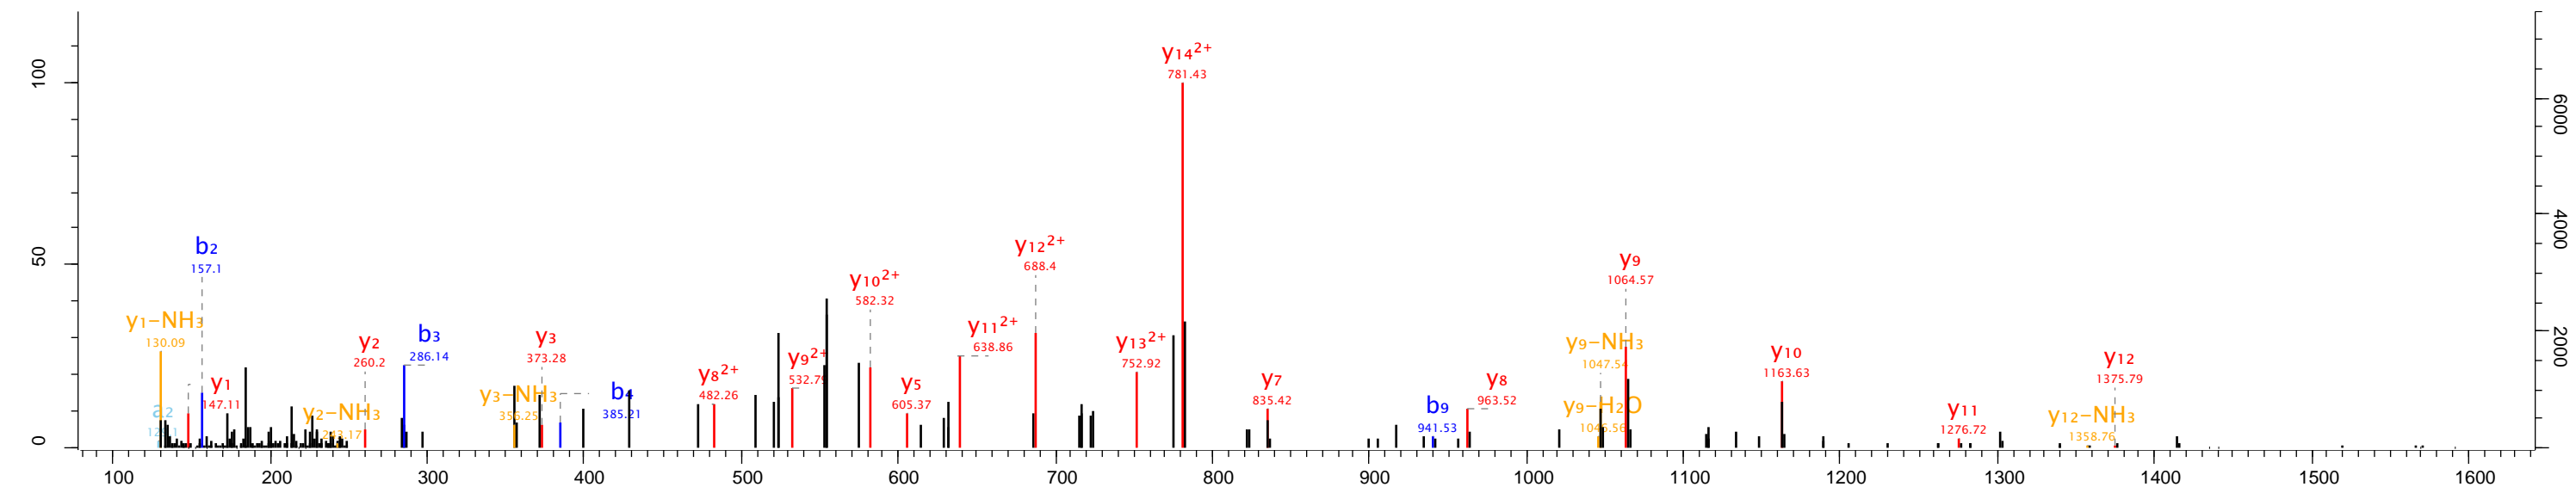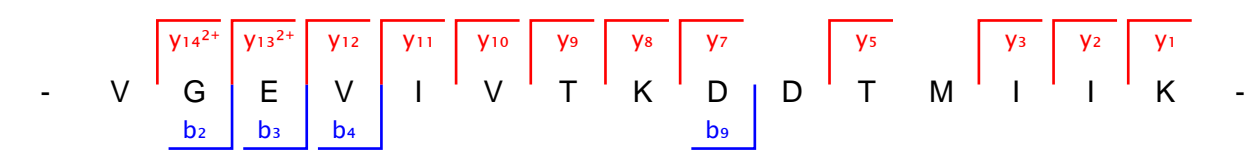

Raw file: 2015-01-05\_CL03\_XenEmb\_x2  
 Scan: 28071 Method: ITMS; HCD Score: 51 m/z: 830.96

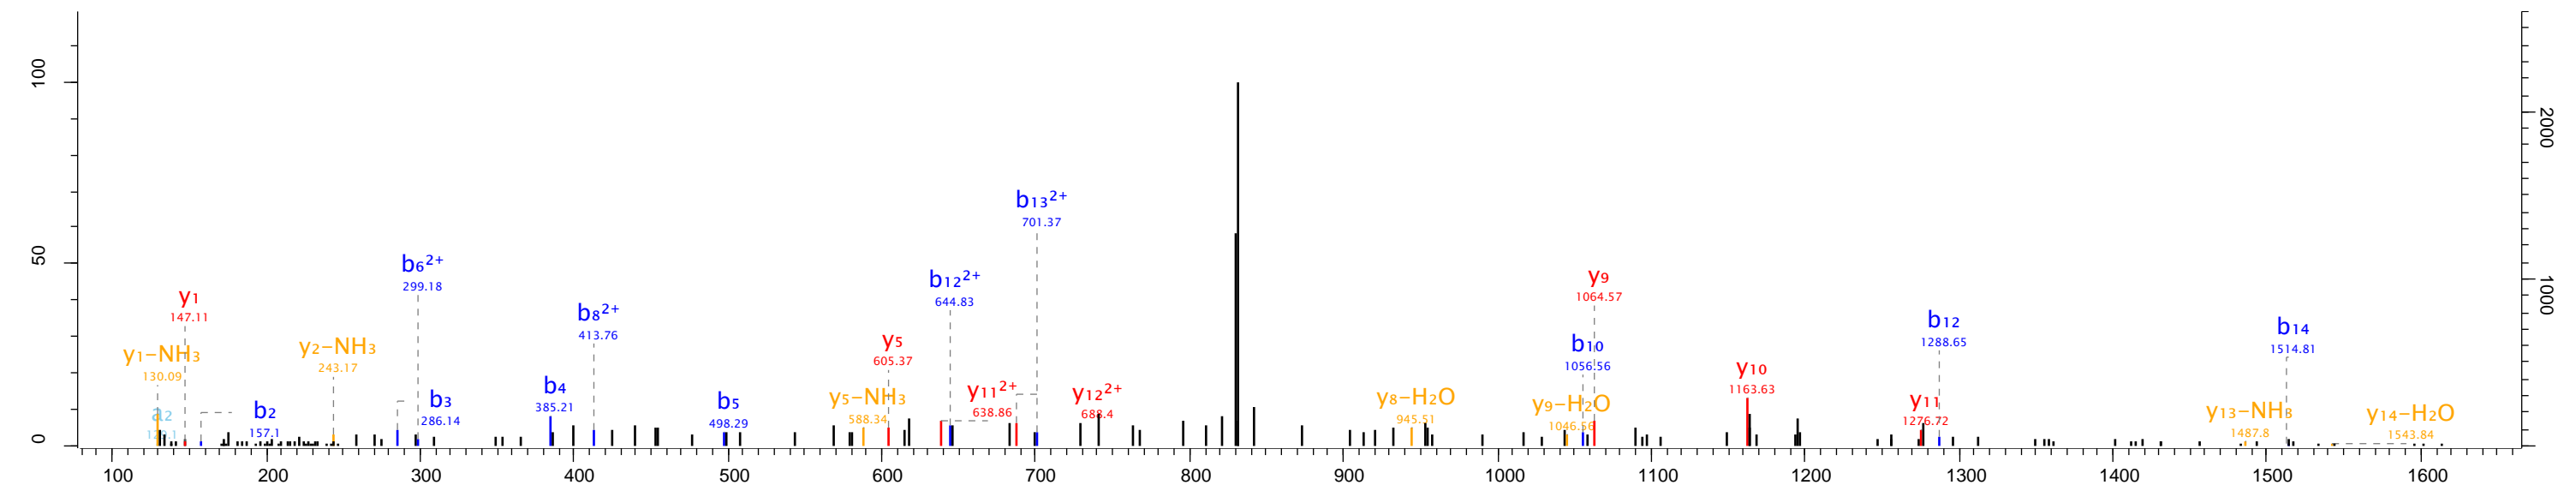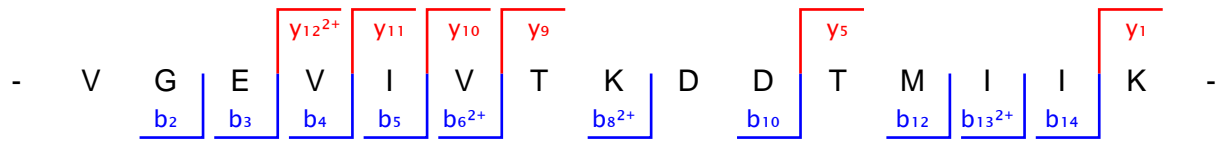

Raw file 2015-01-05\_CL03\_XenEmb\_x2 Scan 28098 Method ITMS; HCD Score 70.47 m/z 831.46

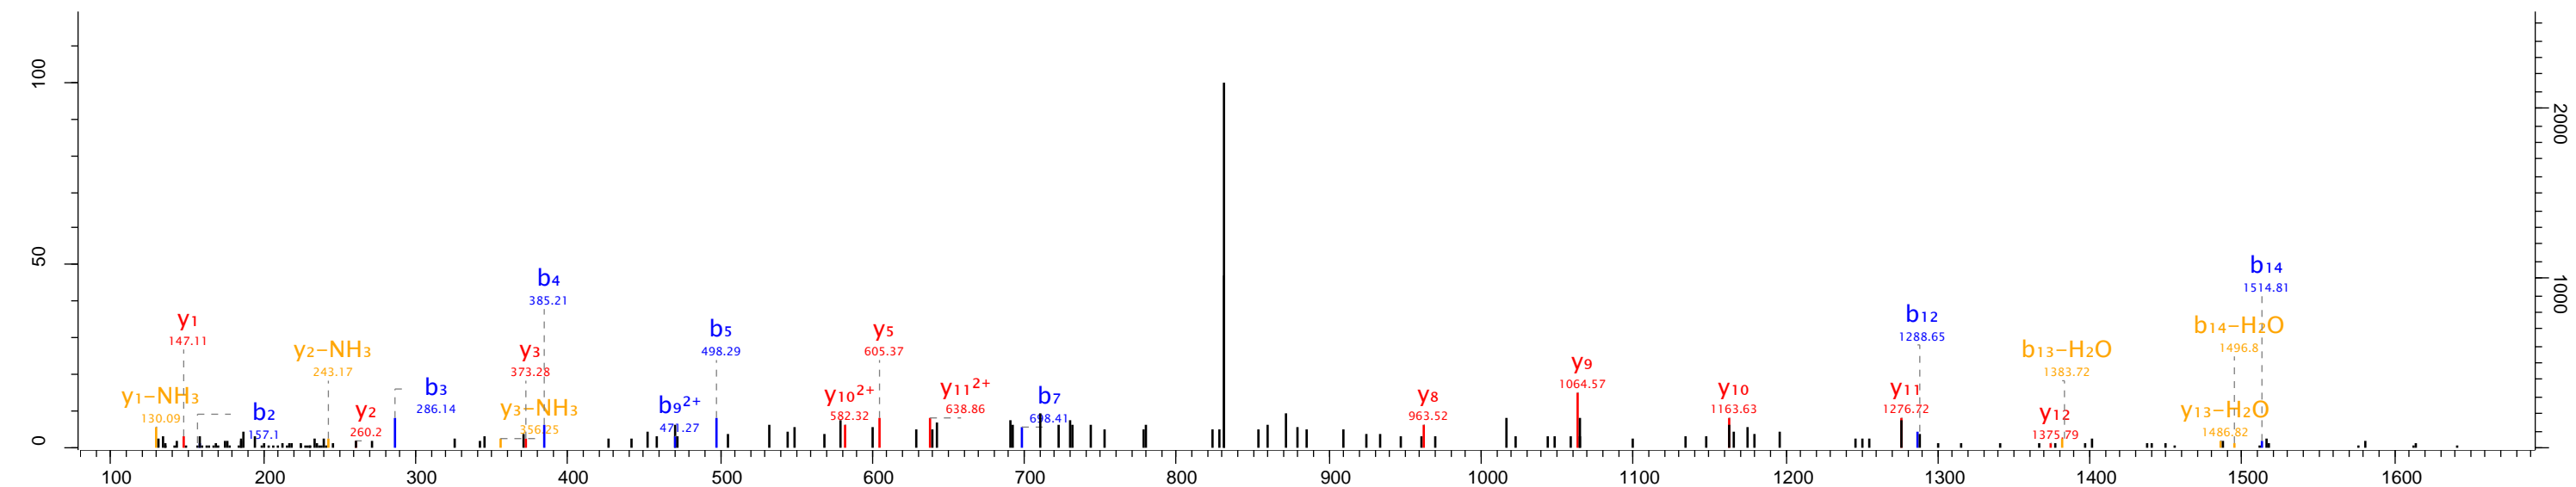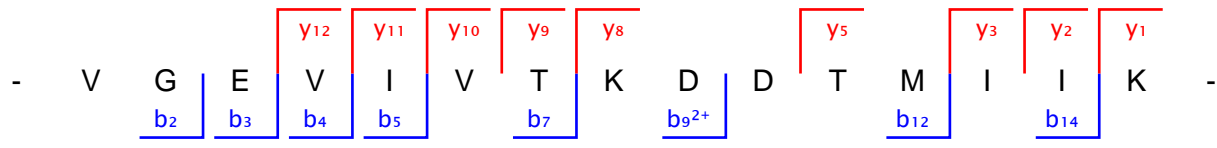

Spectral Annotation for Single-Peptide IDs in 16-cell Embryo using Q-OT-LIT

Raw file: 2015-01-05\_CL03\_XenEmb\_x2  
 Scan: 28114 Method: ITMS; HCD Score: 51.07 m/z: 831.46

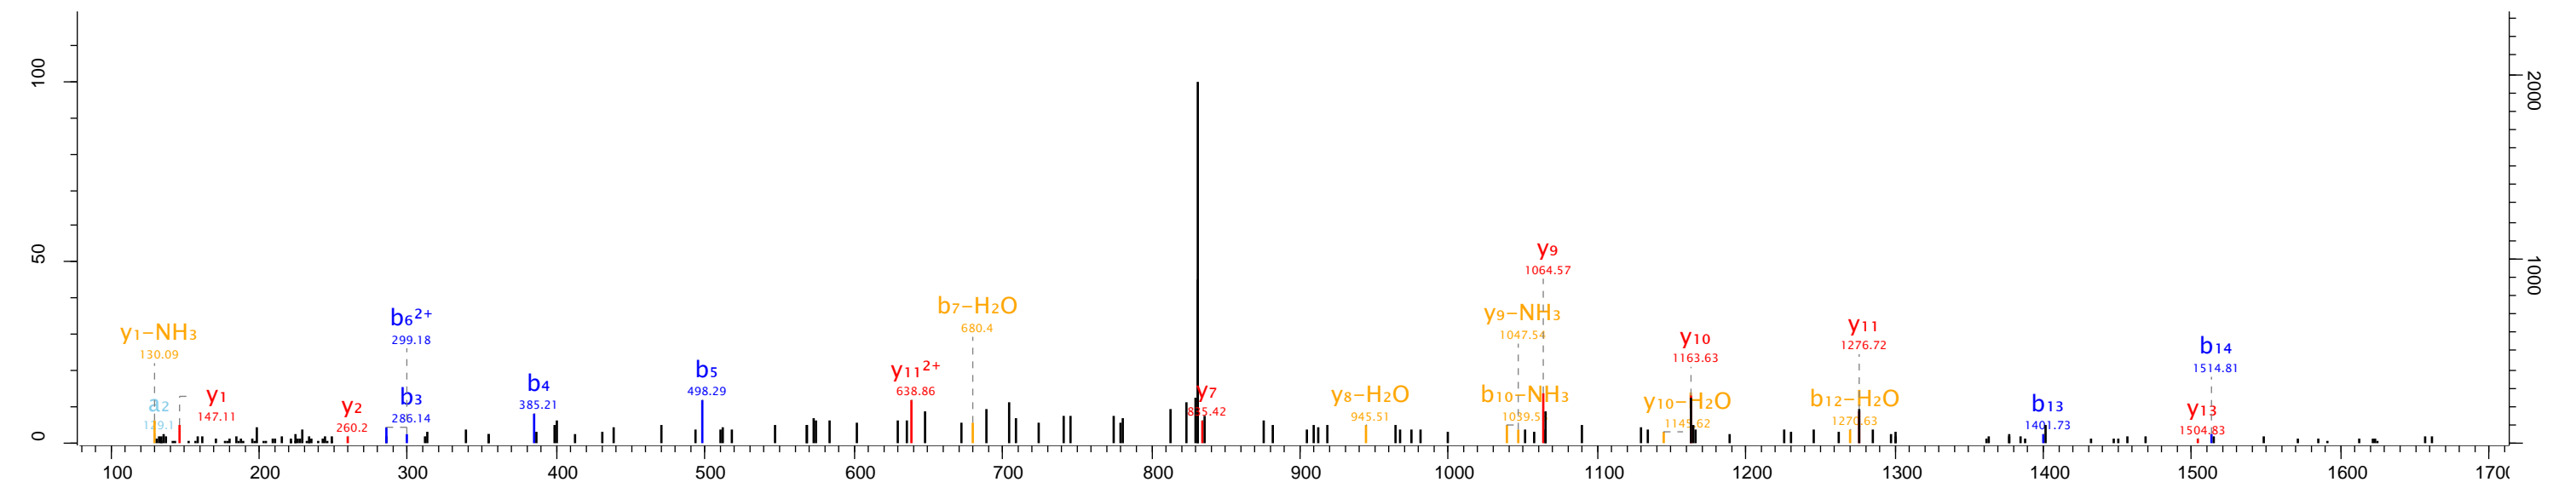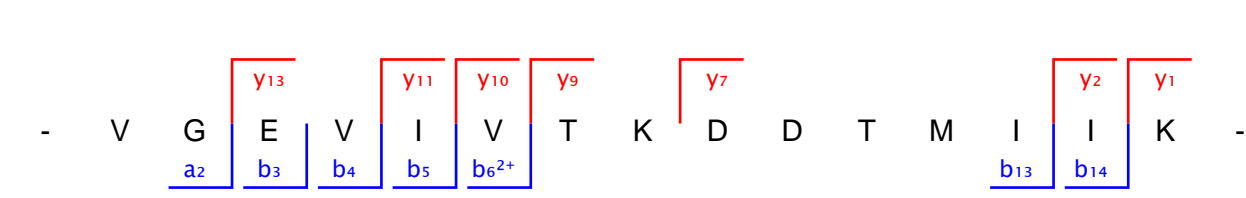

Raw file: 2015-01-05\_CL03\_XenEmb\_x2  
 Scan: 28185 Method: ITMS; HCD Score: 55.1 m/z: 570.96

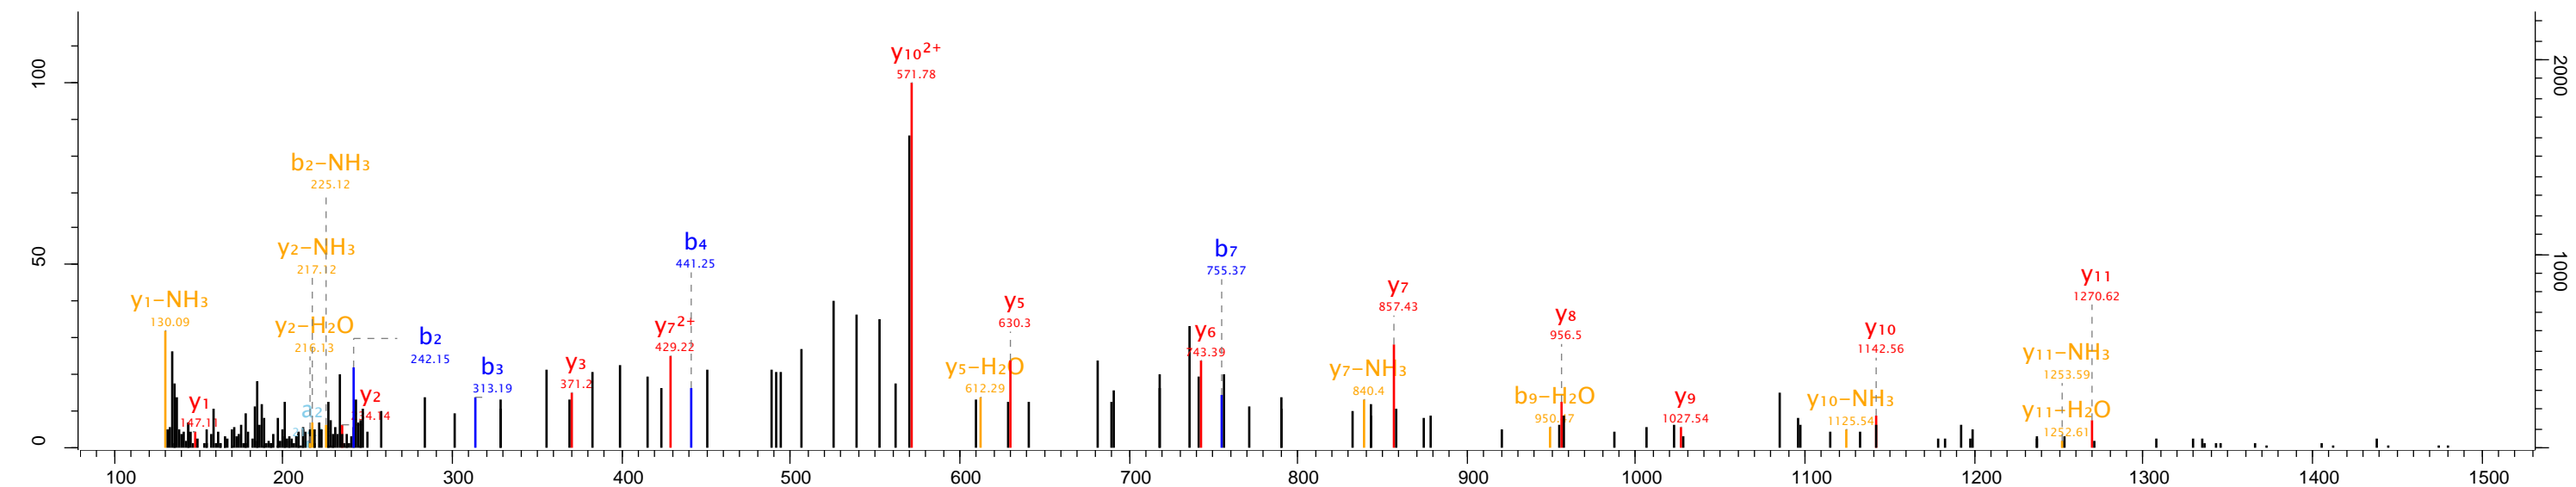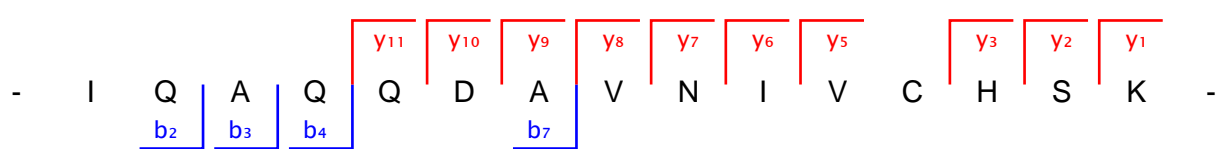

Raw file: 2015-01-05\_CL03\_XenEmb\_x2  
 Scan: 28192 Method: ITMS; HCD Score: 72.02 m/z: 422.75

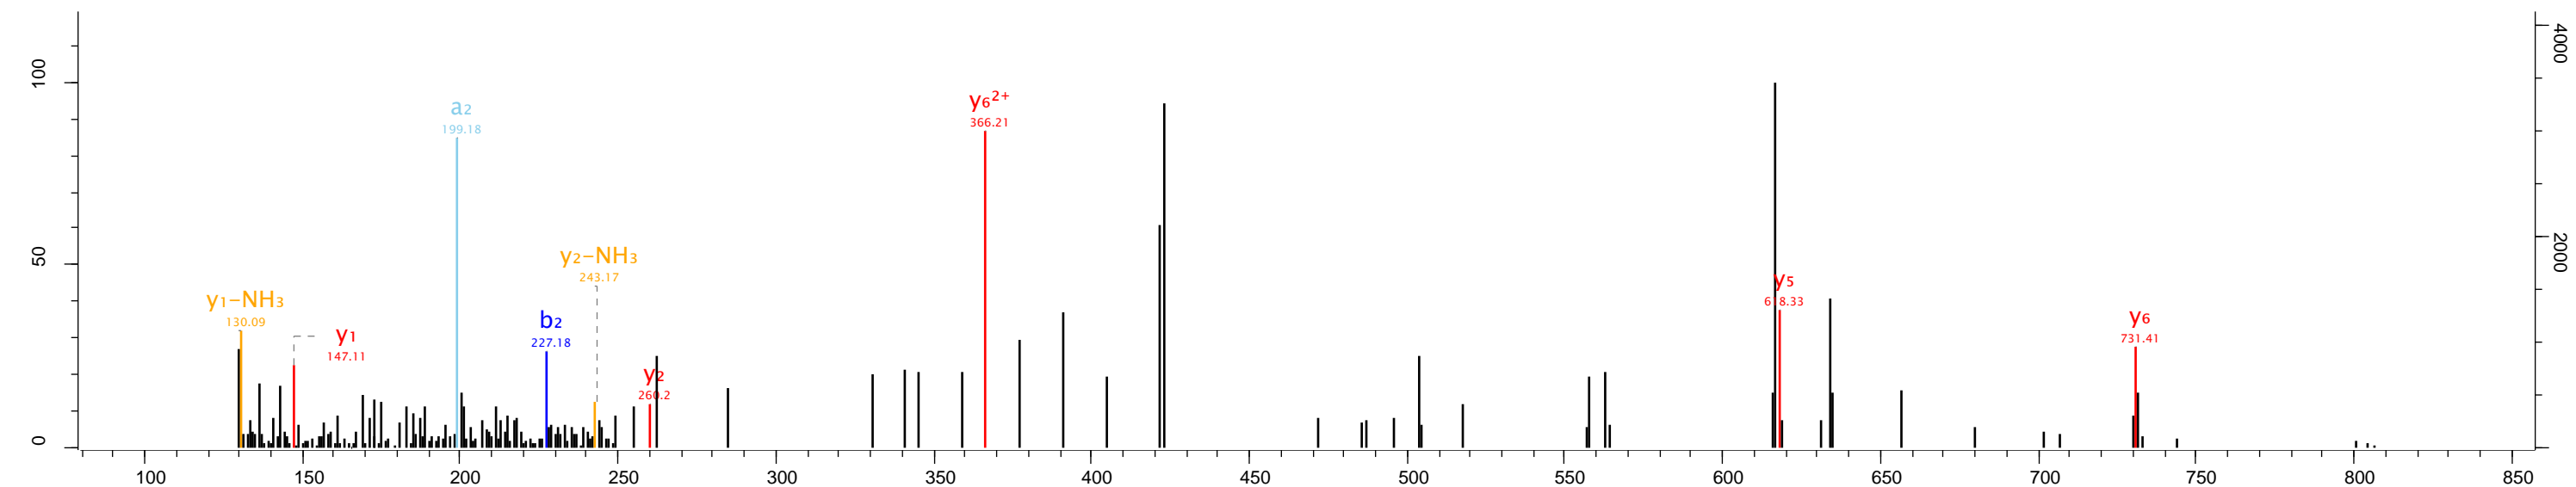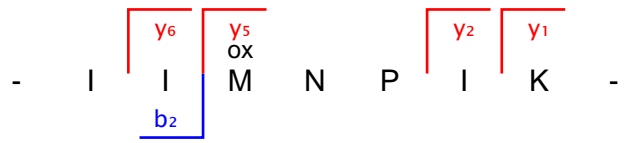



Raw file 2015-01-05\_CL03\_XenEmb\_x2 Scan 28204 Method ITMS; HCD Score 38.38 m/z 571.29

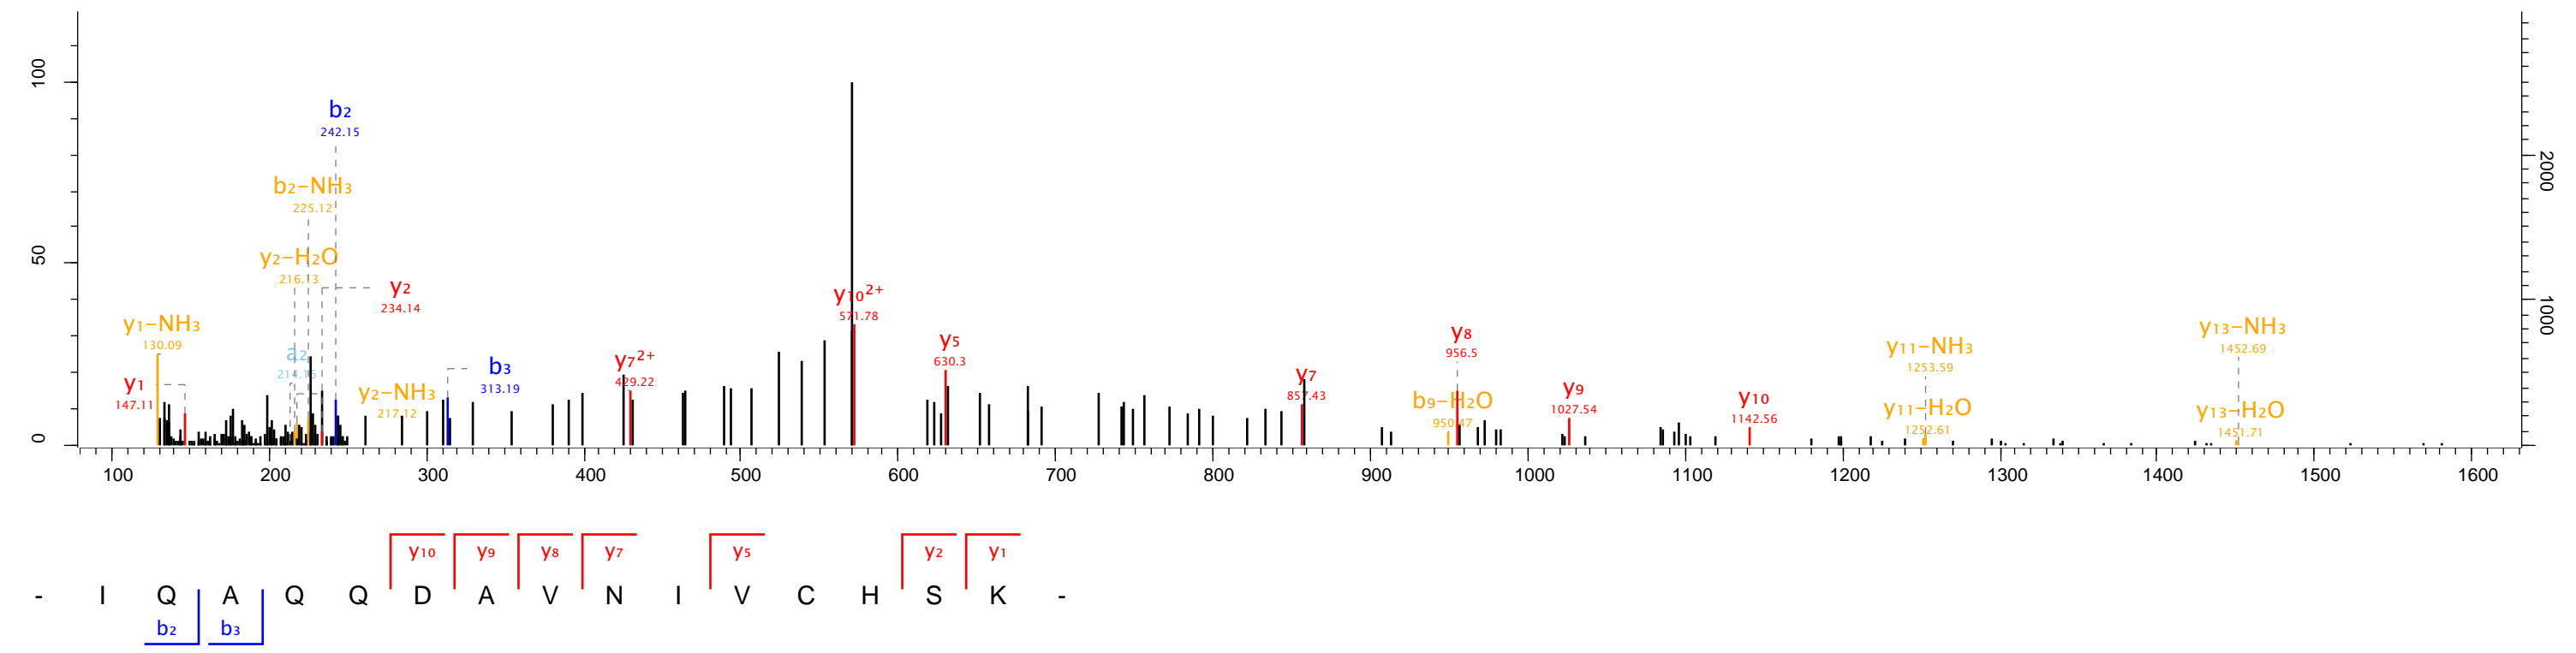

Raw file: 2015-01-05\_CL03\_XenEmb\_x2  
 Scan: 28274 Method: ITMS; HCD Score: 46.34 m/z: 578.98

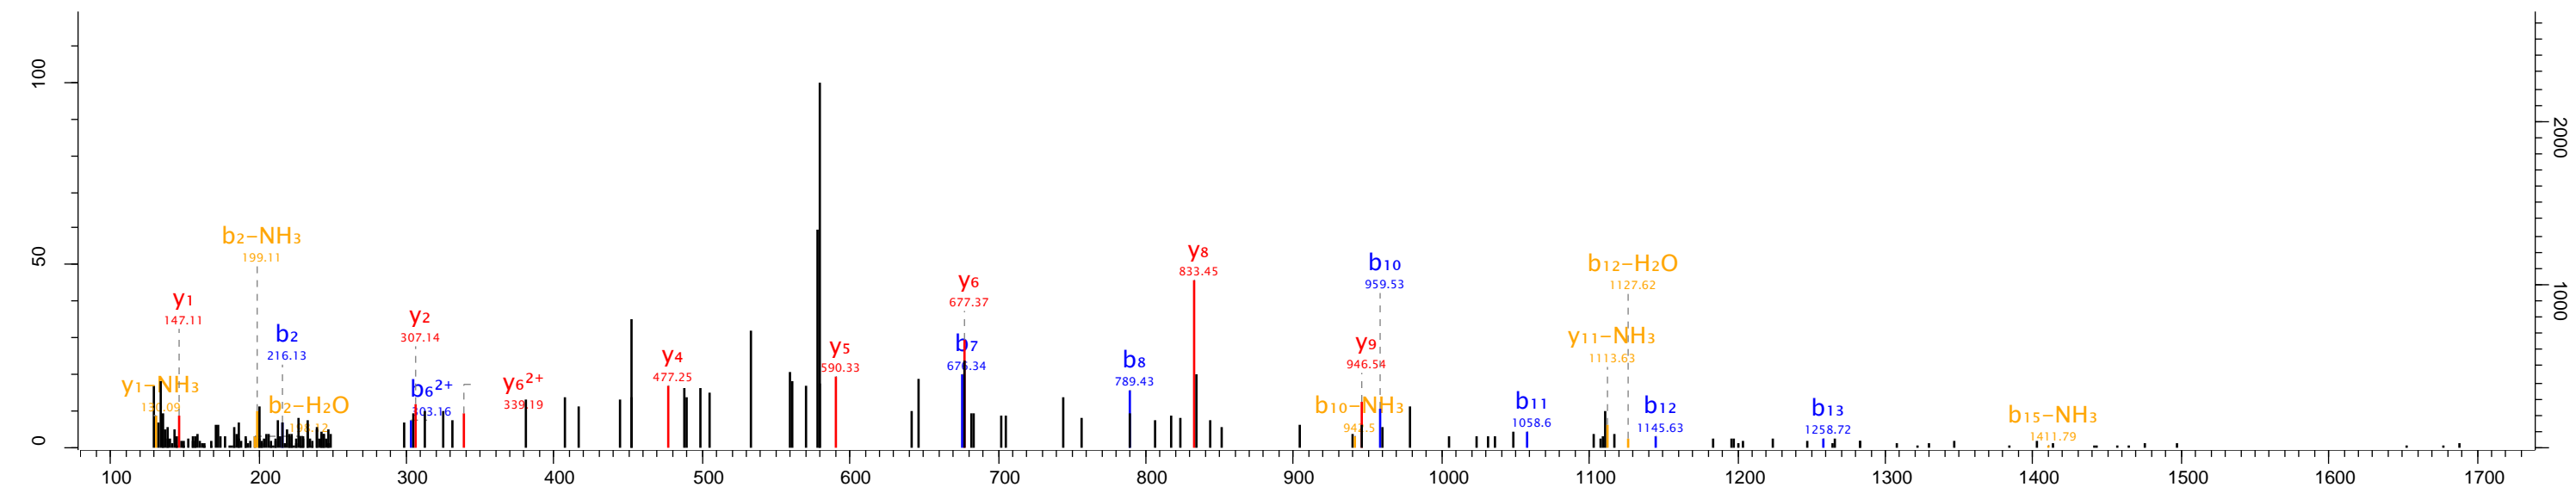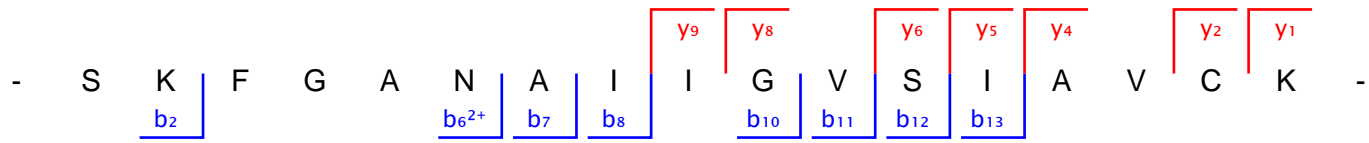

Raw file 2015-01-05\_CL03\_XenEmb\_x2 Scan 28299 Method ITMS; HCD Score 40.97 m/z 578.99

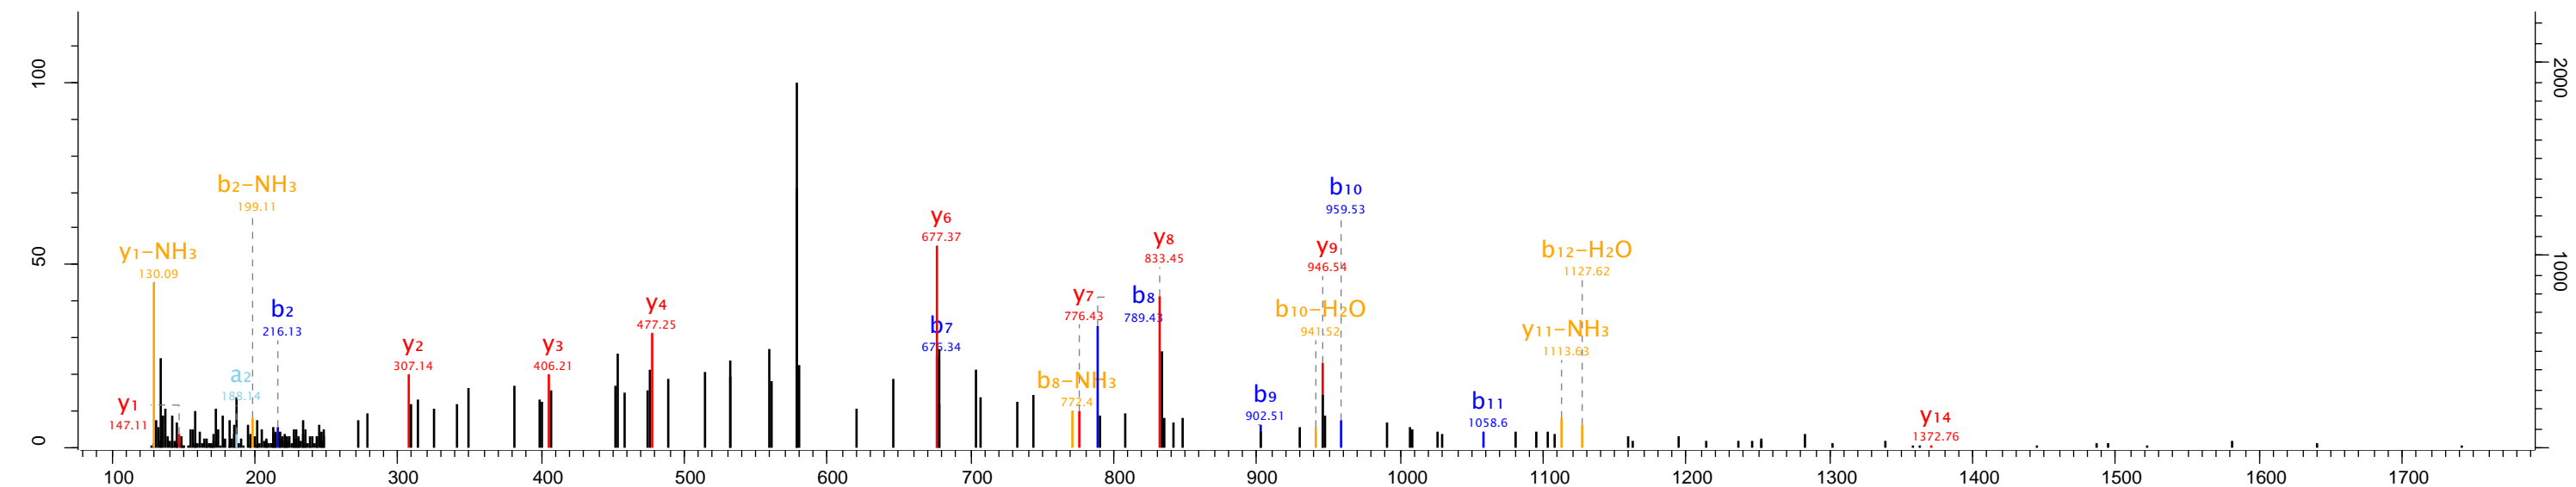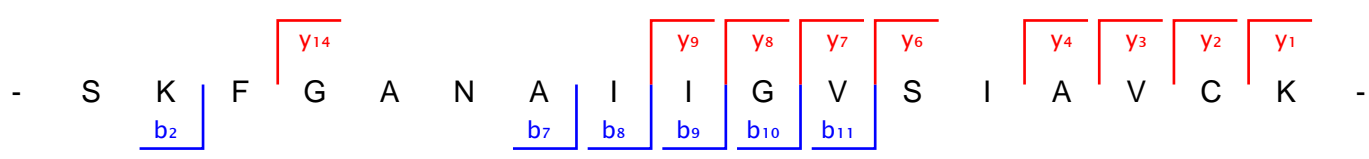

Raw file: 2015-01-05\_CL03\_XenEmb\_x2  
 Scan: 28319 Method: ITMS; HCD Score: 57.53 m/z: 578.99

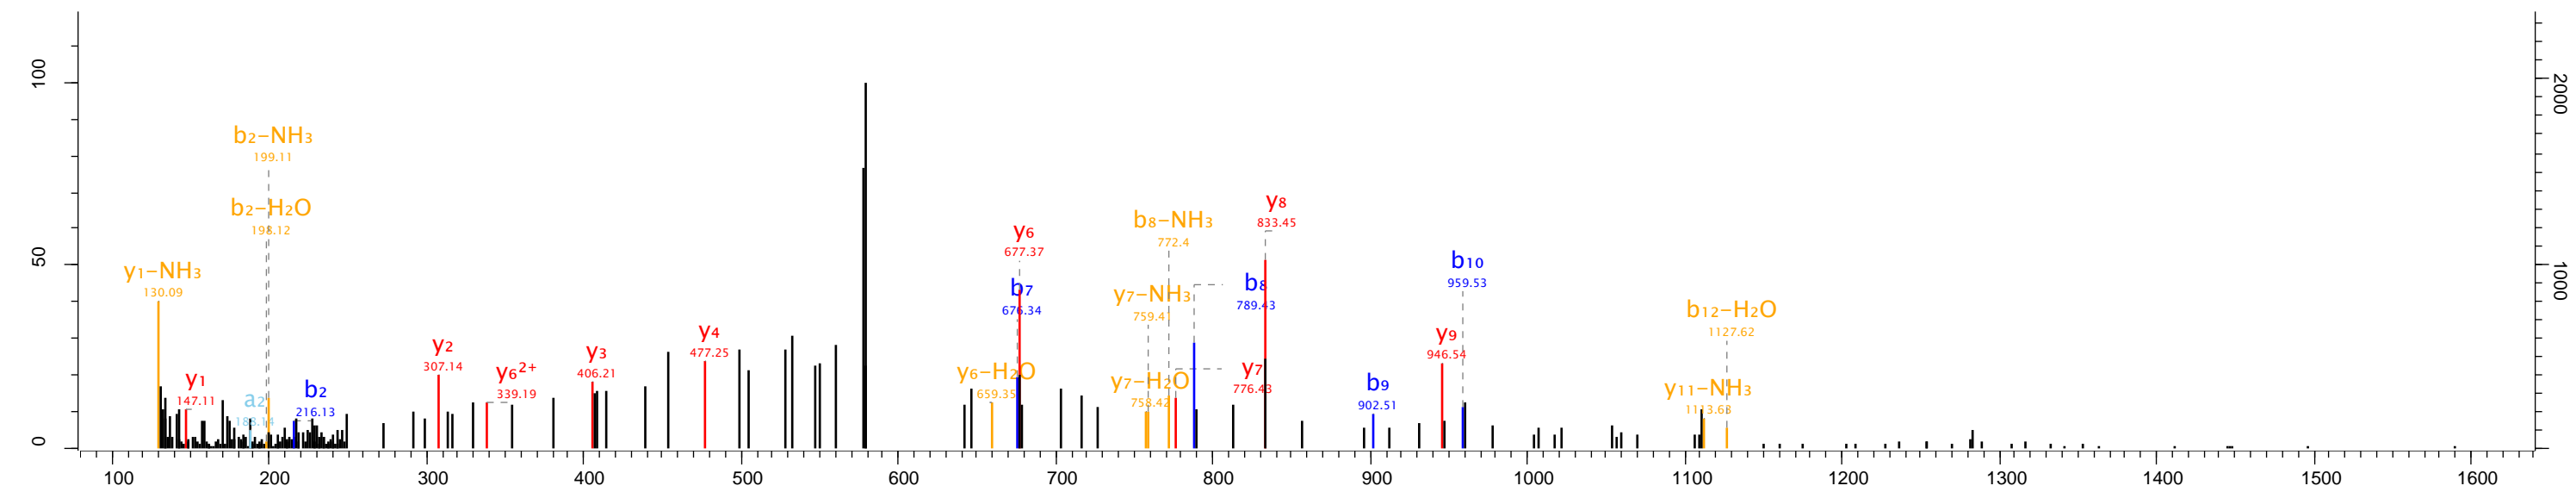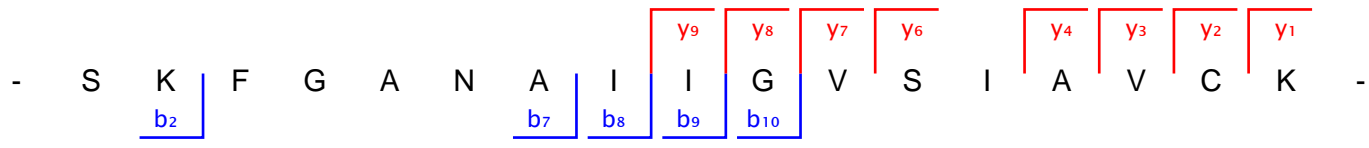

Raw file: 2015-01-05\_CL03\_XenEmb\_x2  
 Scan: 28642 Method: ITMS; HCD Score: 53.21 m/z: 692.98

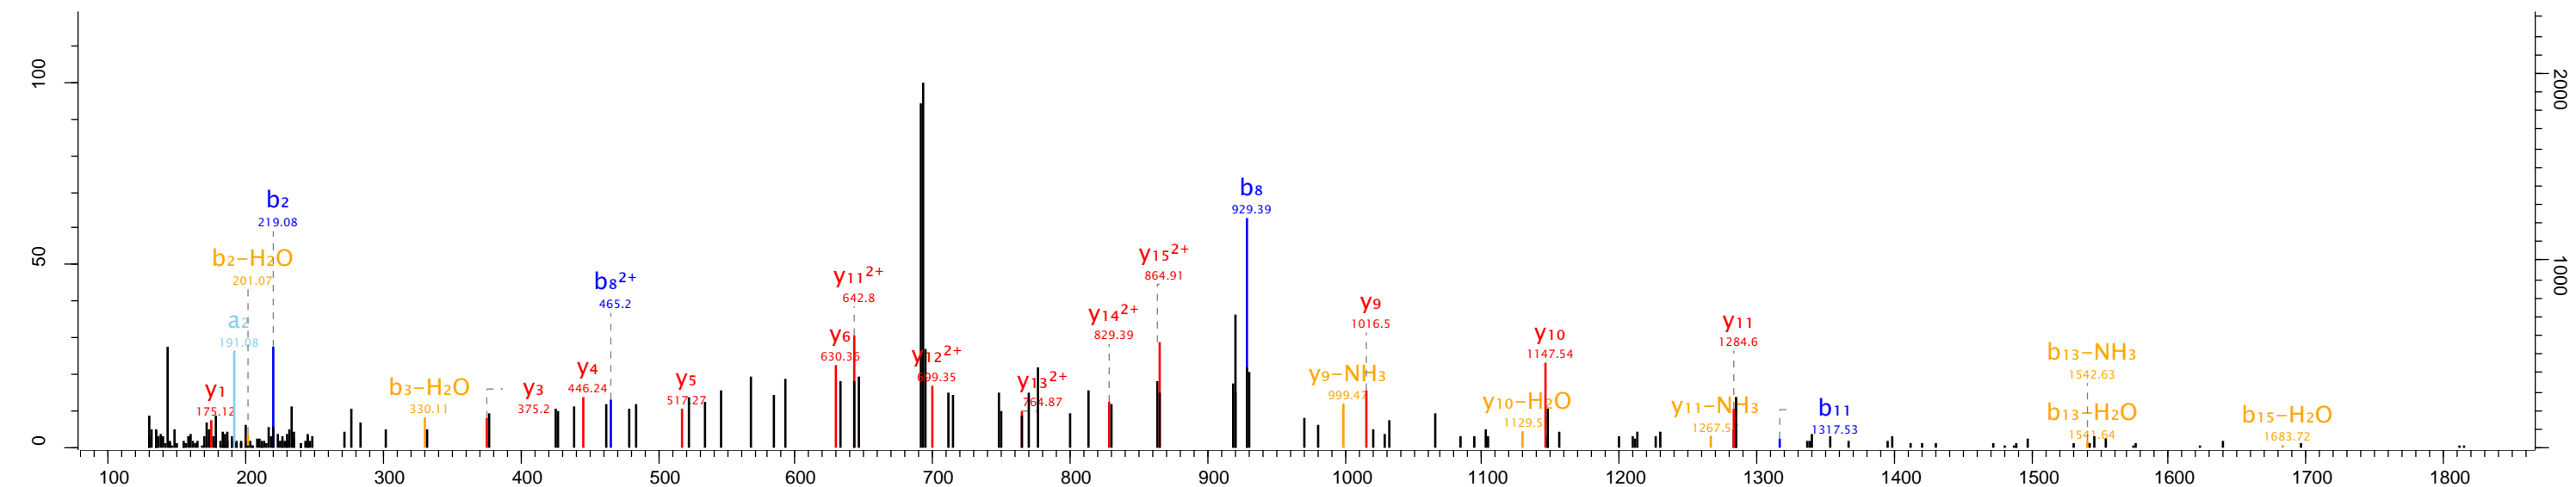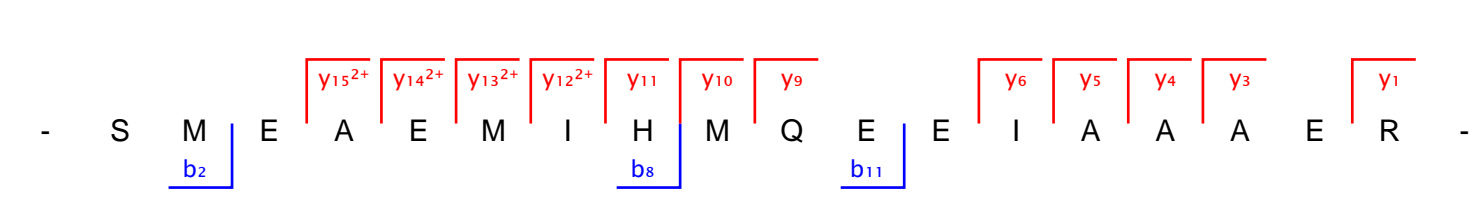

Spectral Annotation for Single-Peptide IDs in 16-cell Embryo using Q-OT-LIT

Raw file: 2015-01-05\_CL03\_XenEmb\_x2  
 Scan: 28646 Method: ITMS; HCD Score: 114.27 m/z: 641.97

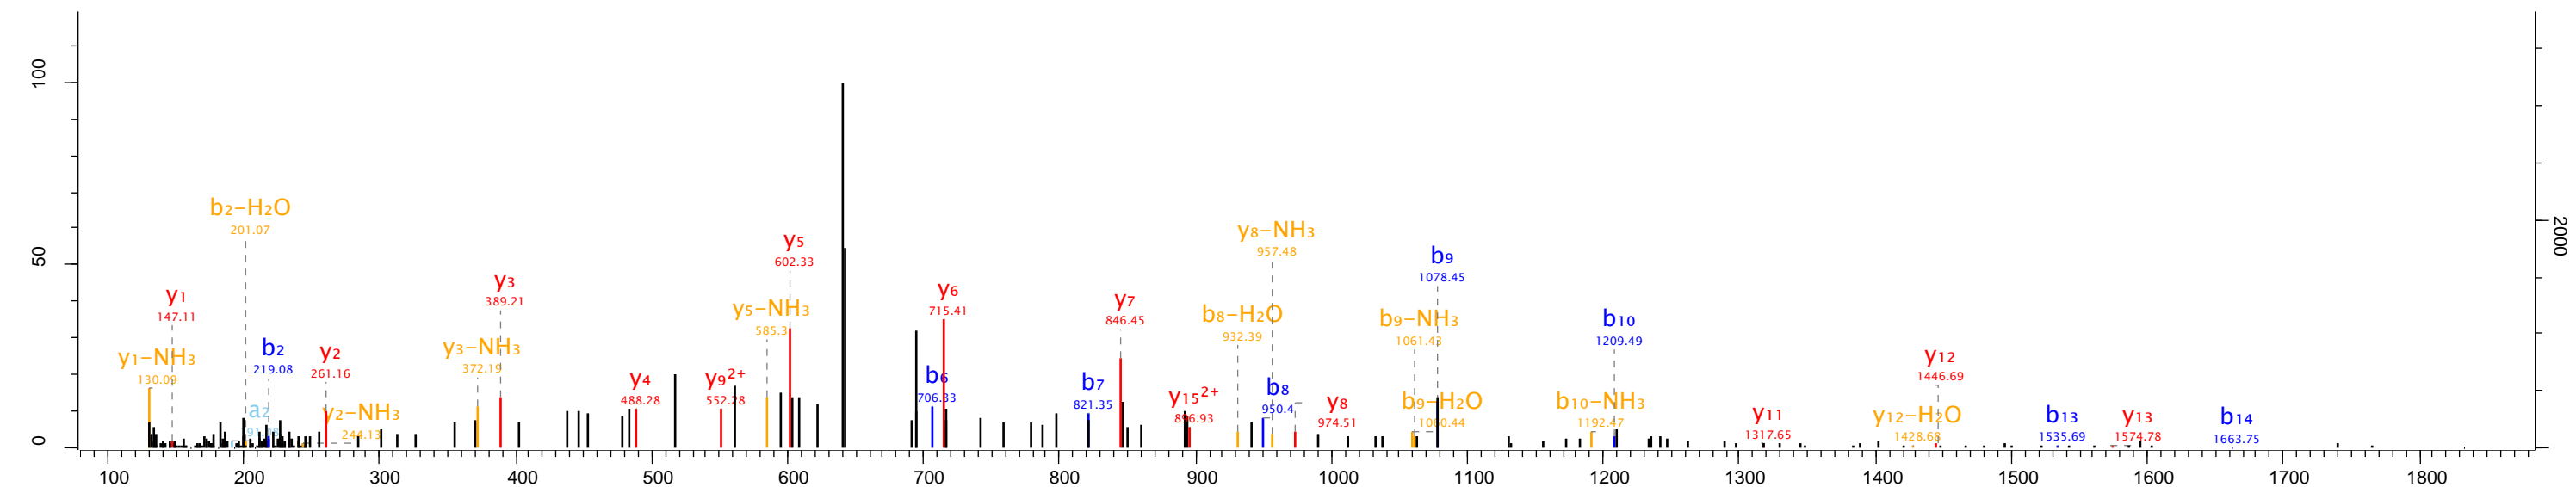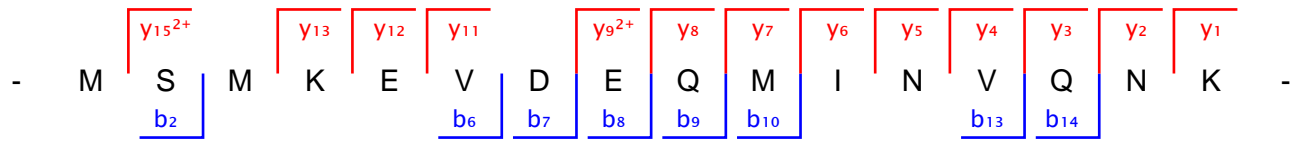

Spectral Annotation for Single-Peptide IDs in 16-cell Embryo using Q-OT-LIT

Raw file: 2015-01-05\_CL03\_XenEmb\_x2  
 Scan: 28738 Method: ITMS; HCD Score: 68.17 m/z: 609.98

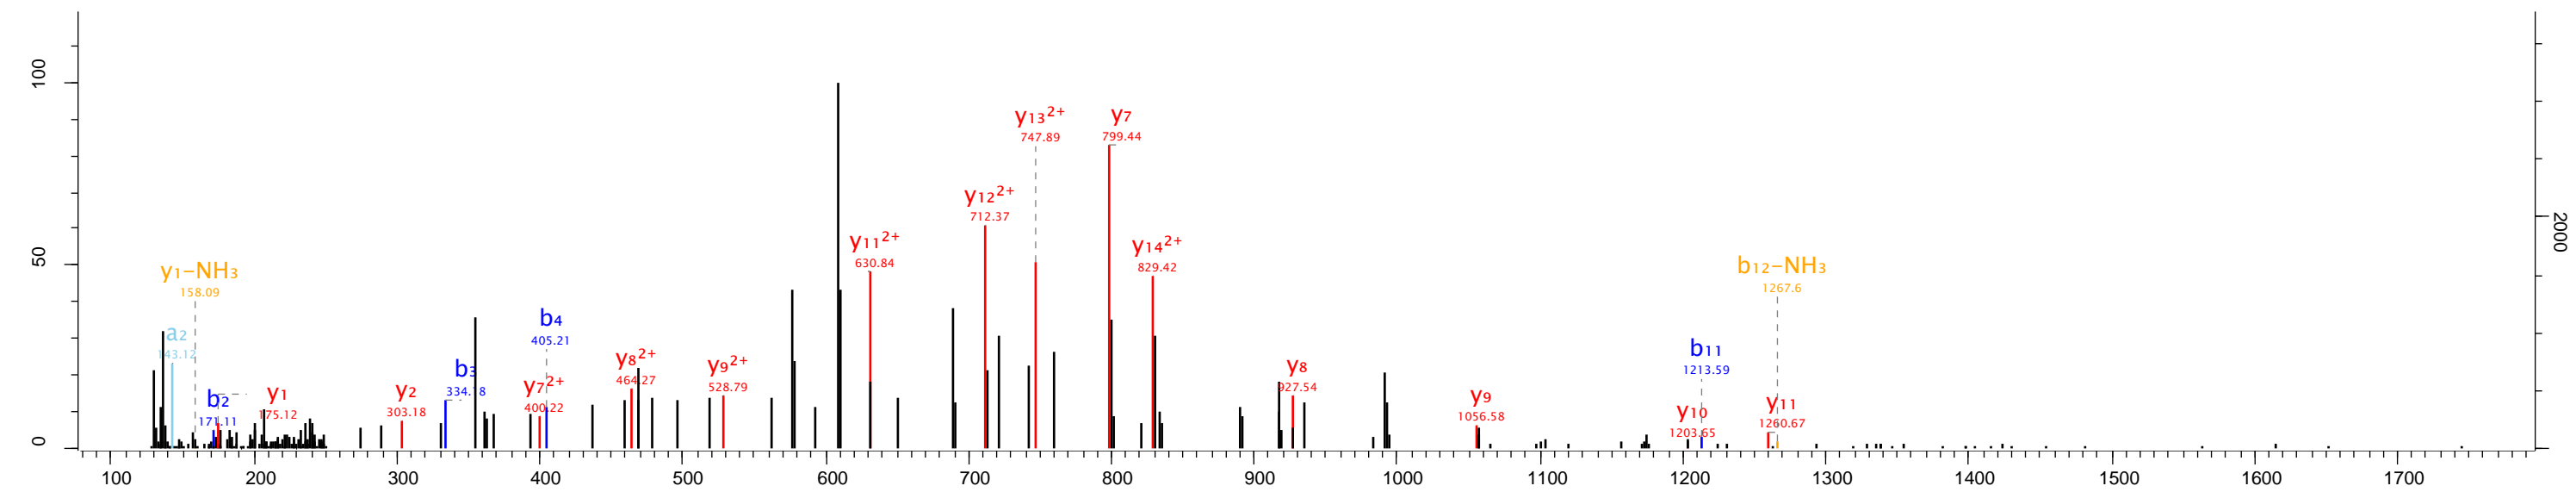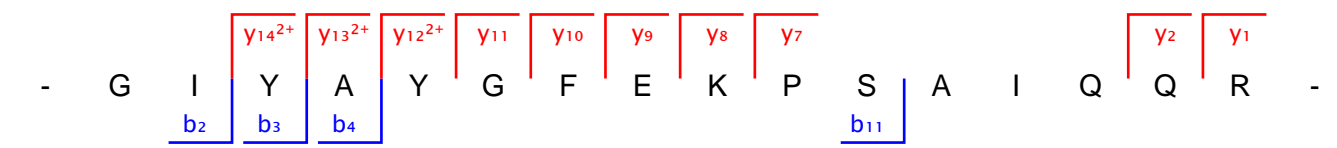

Raw file Scan Method Score m/z  
 2015-01-05\_CL03\_XenEmb\_x2 28806 ITMS; HCD 55.66 560.94

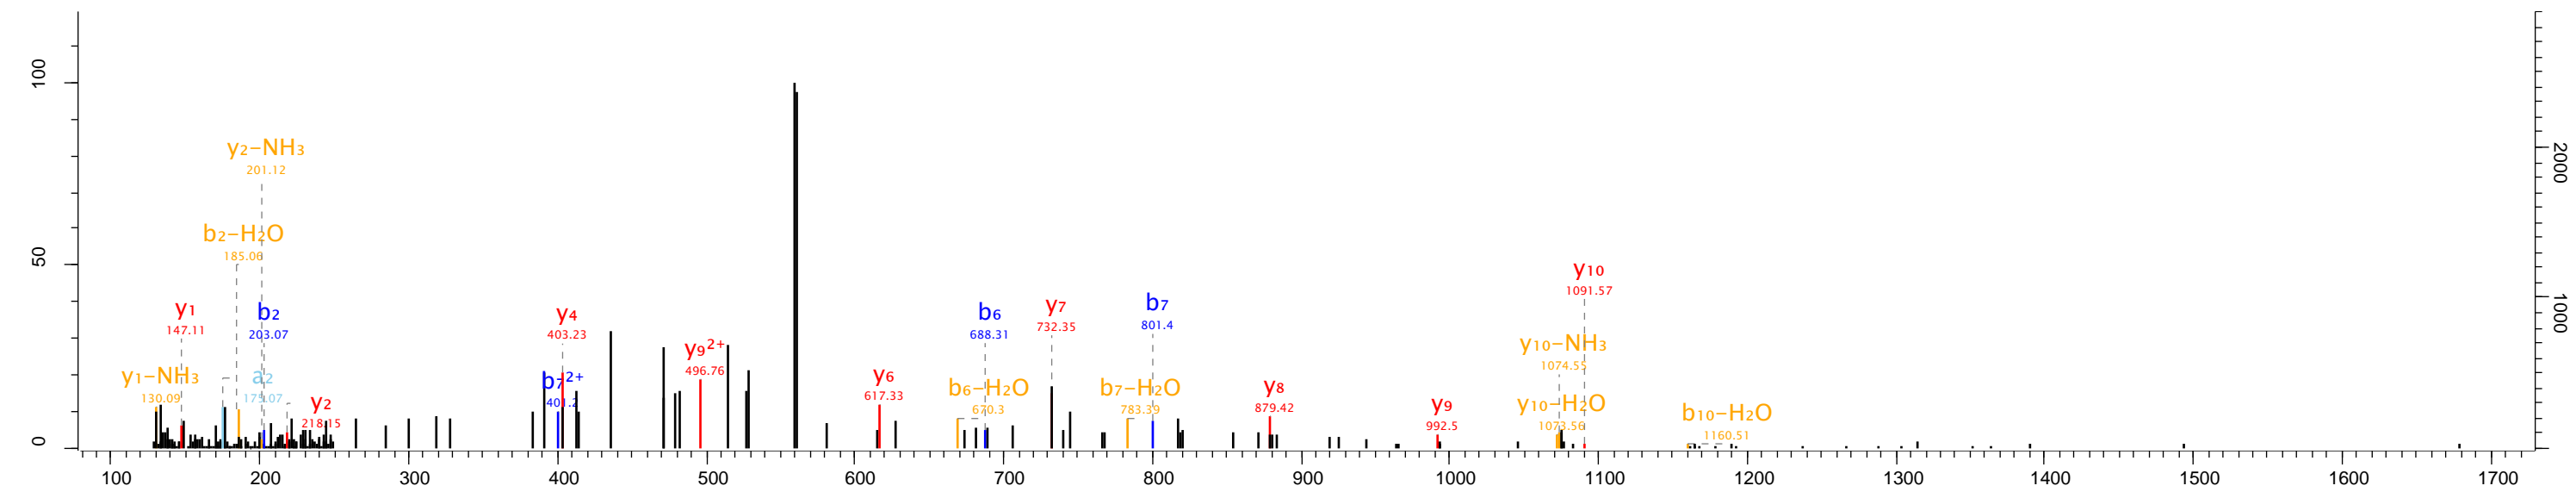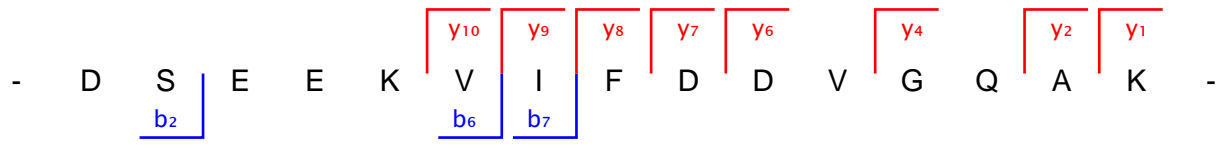

Spectral Annotation for Single-Peptide IDs in 16-cell Embryo using Q-OT-LIT



Raw file 2015-01-05\_CL03\_XenEmb\_x2  
 Scan 28904 Method ITMS; HCD Score 54.77 m/z 590.67

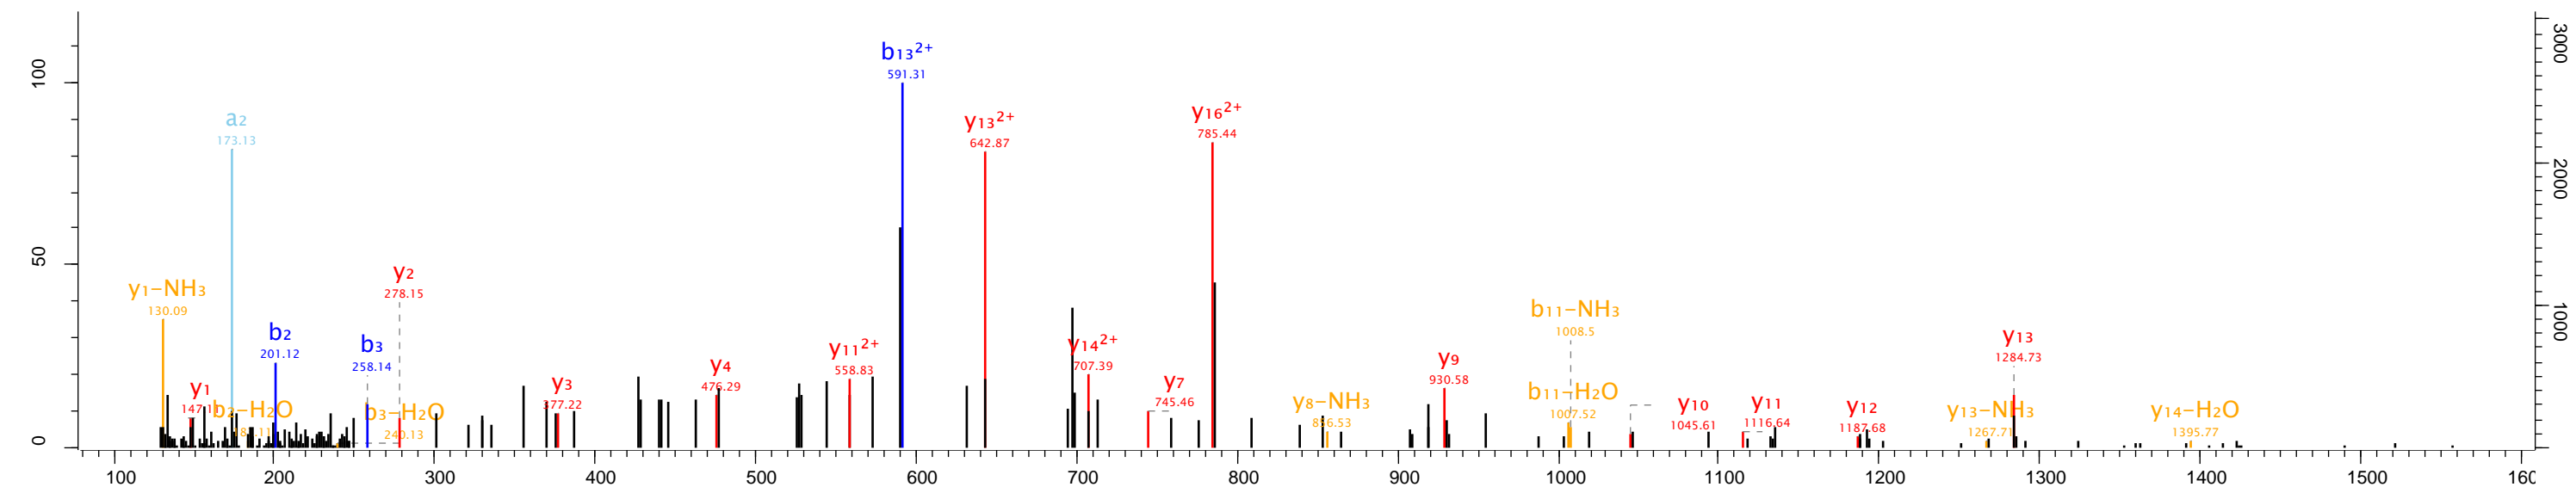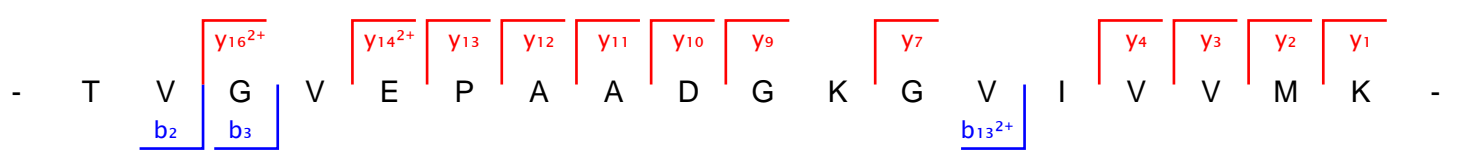

Spectral Annotation for Single-Peptide IDs in 16-cell Embryo using Q-OT-LIT

Raw file: 2015-01-05\_CL03\_XenEmb\_x2  
 Scan: 28997 Method: ITMS; HCD Score: 62.81 m/z: 584.69

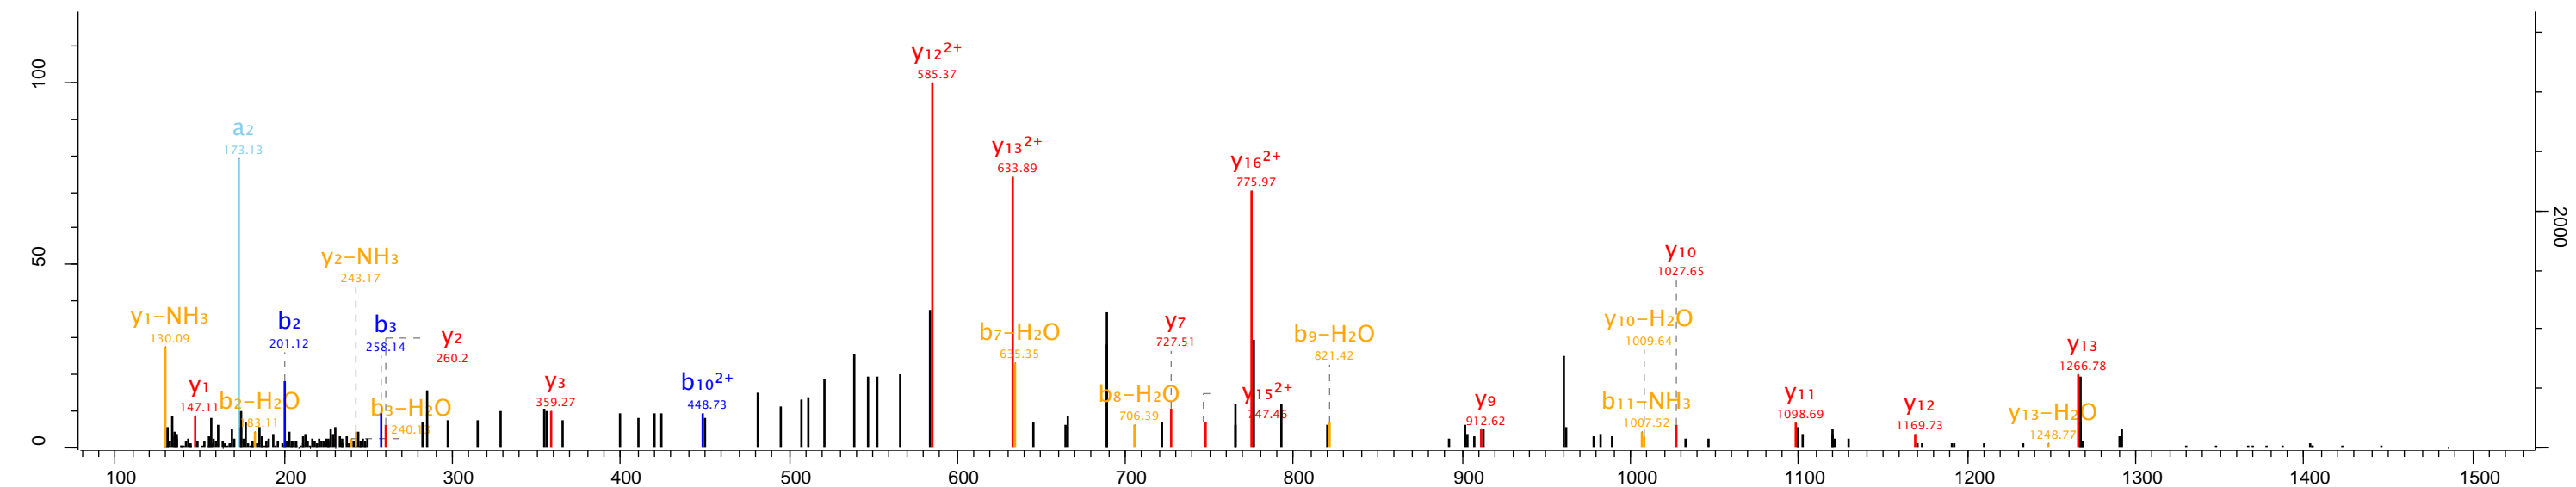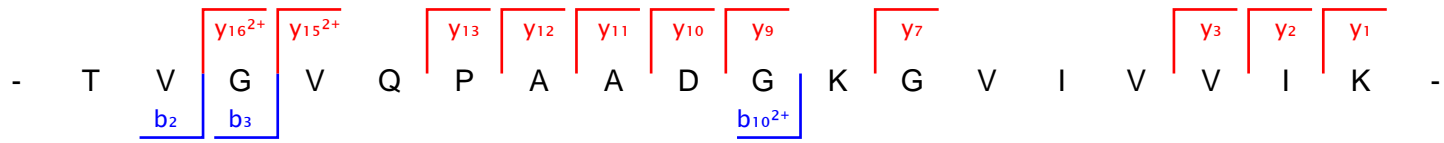

Spectral Annotation for Single-Peptide IDs in 16-cell Embryo using Q-OT-LIT

Raw file: 2015-01-05\_CL03\_XenEmb\_x2  
 Scan: 29036 Method: ITMS; HCD Score: 52.73 m/z: 644.64

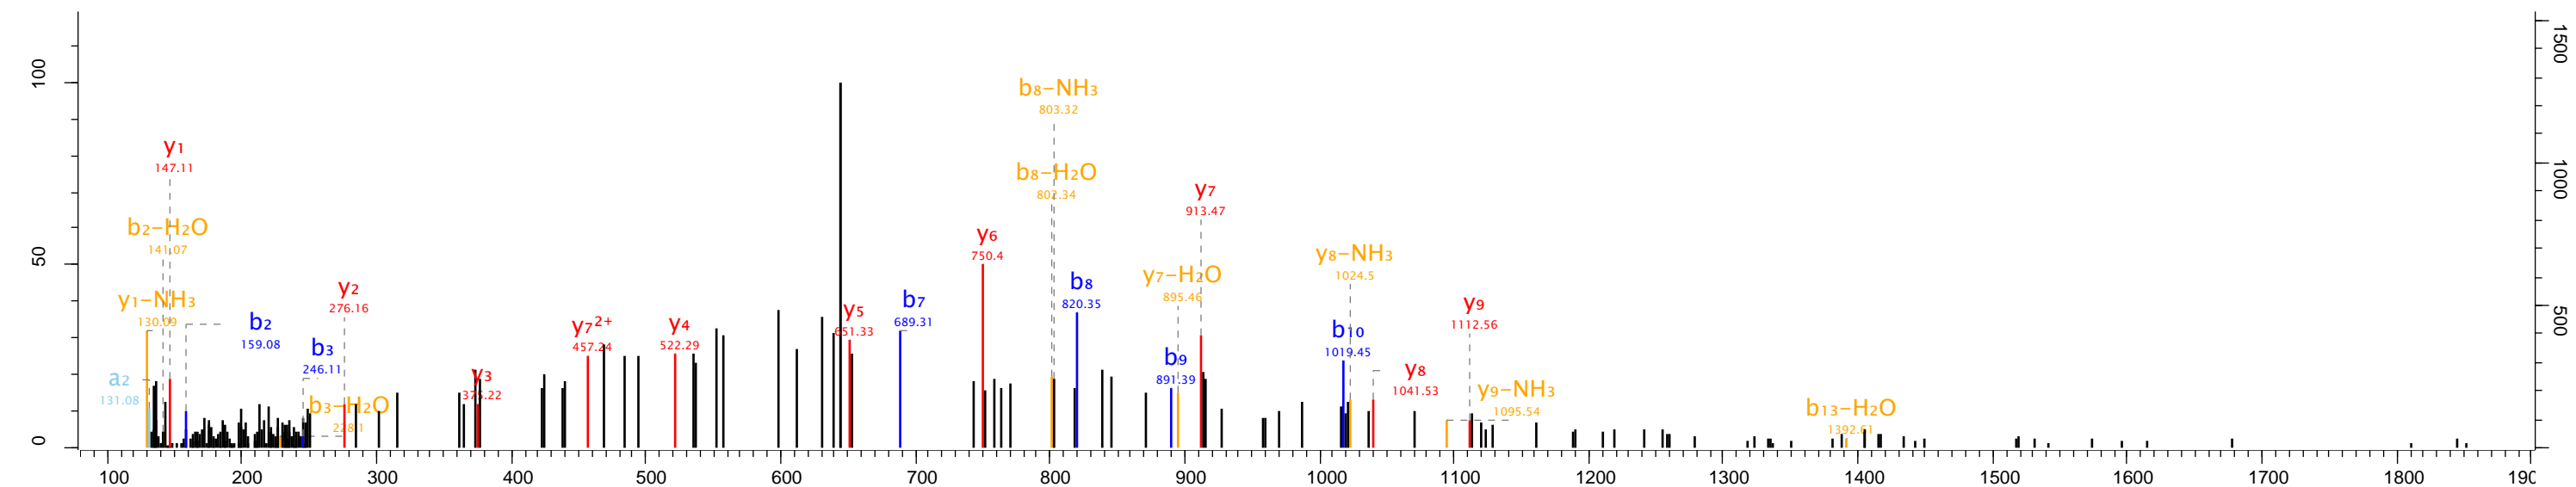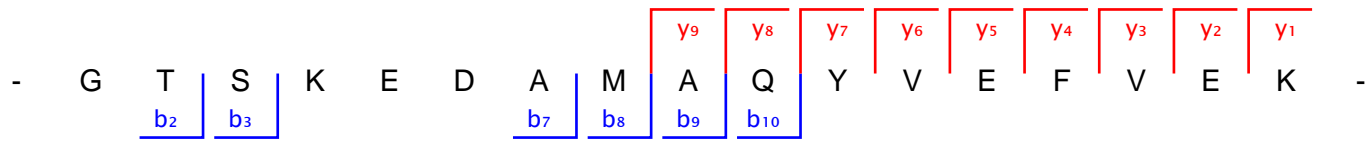

Raw file 2015-01-05\_CL03\_XenEmb\_x2 Scan 29167 Method ITMS; HCD Score 100.02 m/z 452.73

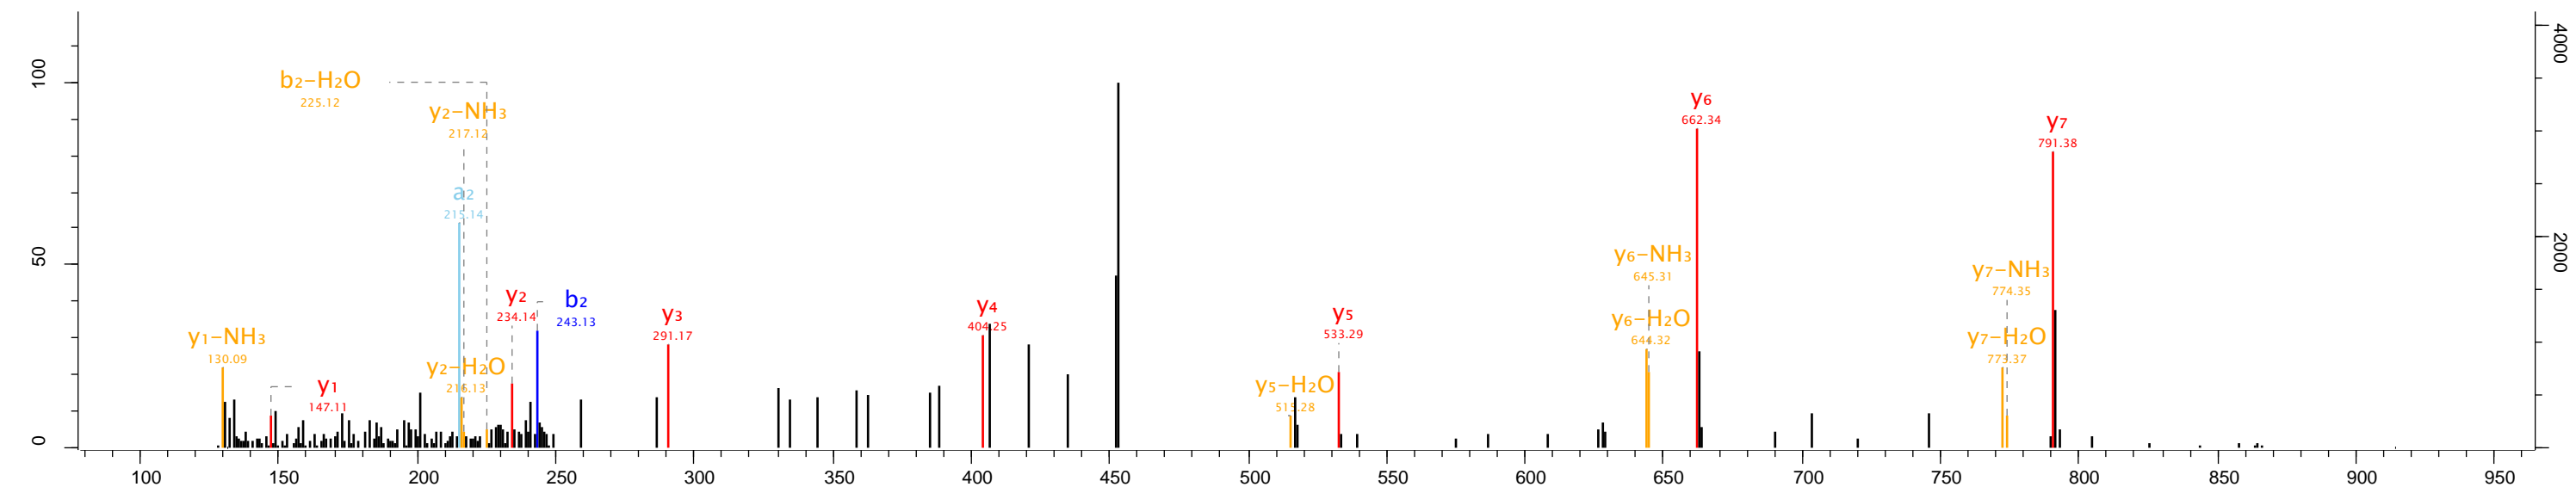

Raw file 2015-01-05\_CL03\_XenEmb\_x2 Scan 29271 Method ITMS; HCD Score 55.01 m/z 630.69

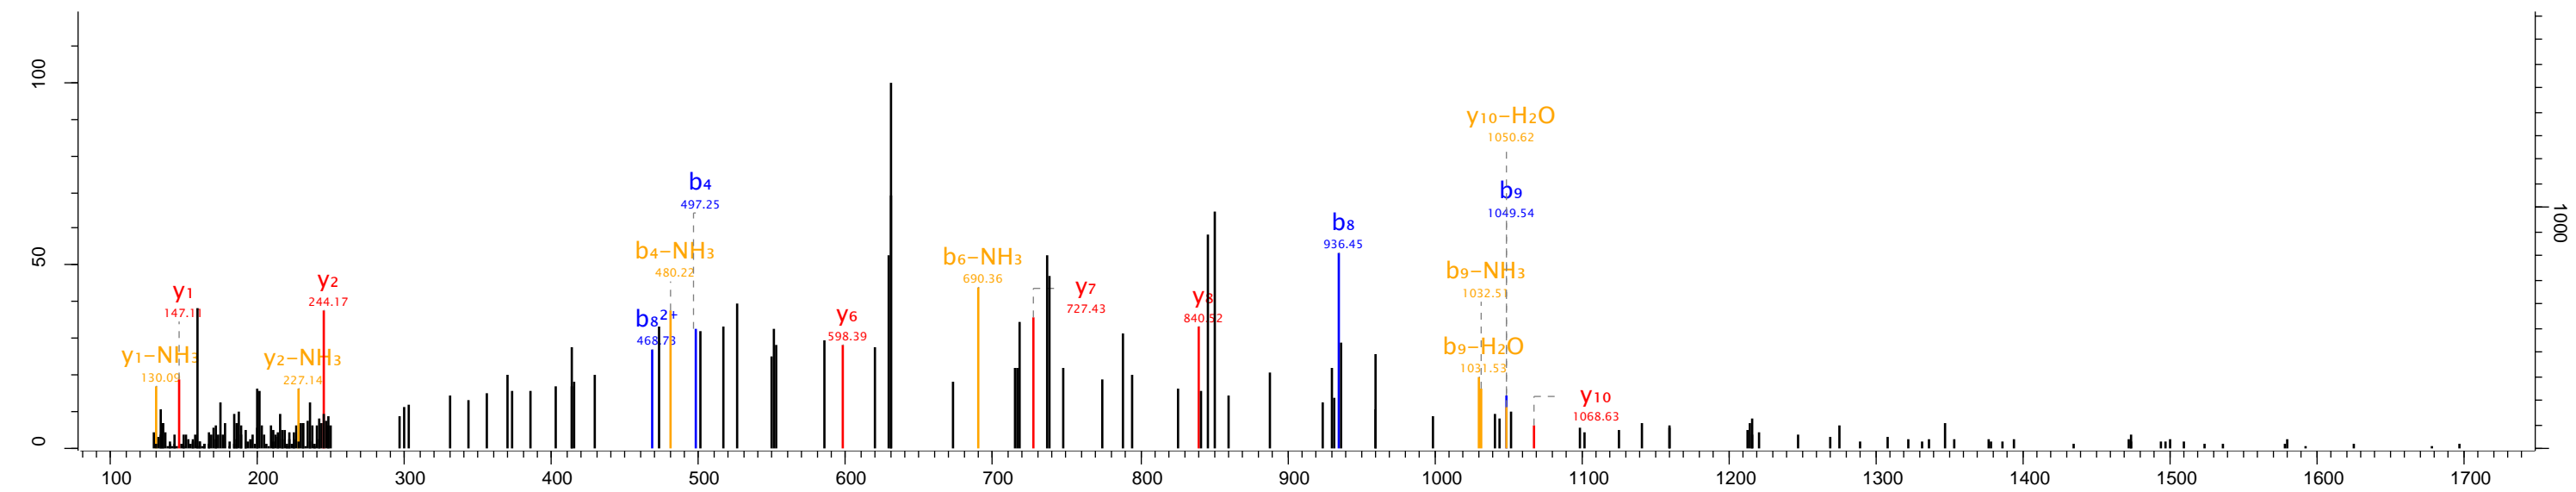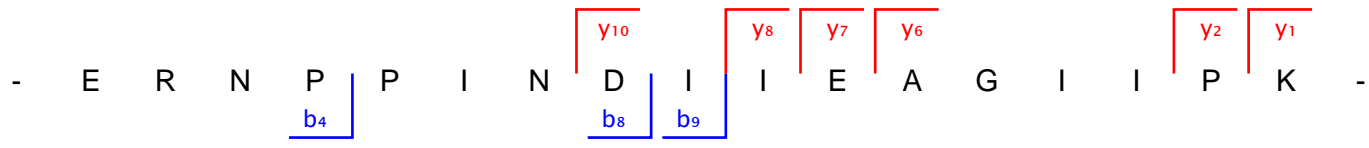

Spectral Annotation for Single-Peptide IDs in 16-cell Embryo using Q-OT-LIT

Raw file 2015-01-05\_CL03\_XenEmb\_x2 Scan 29390 Method ITMS; HCD Score 106.6 m/z 451.27

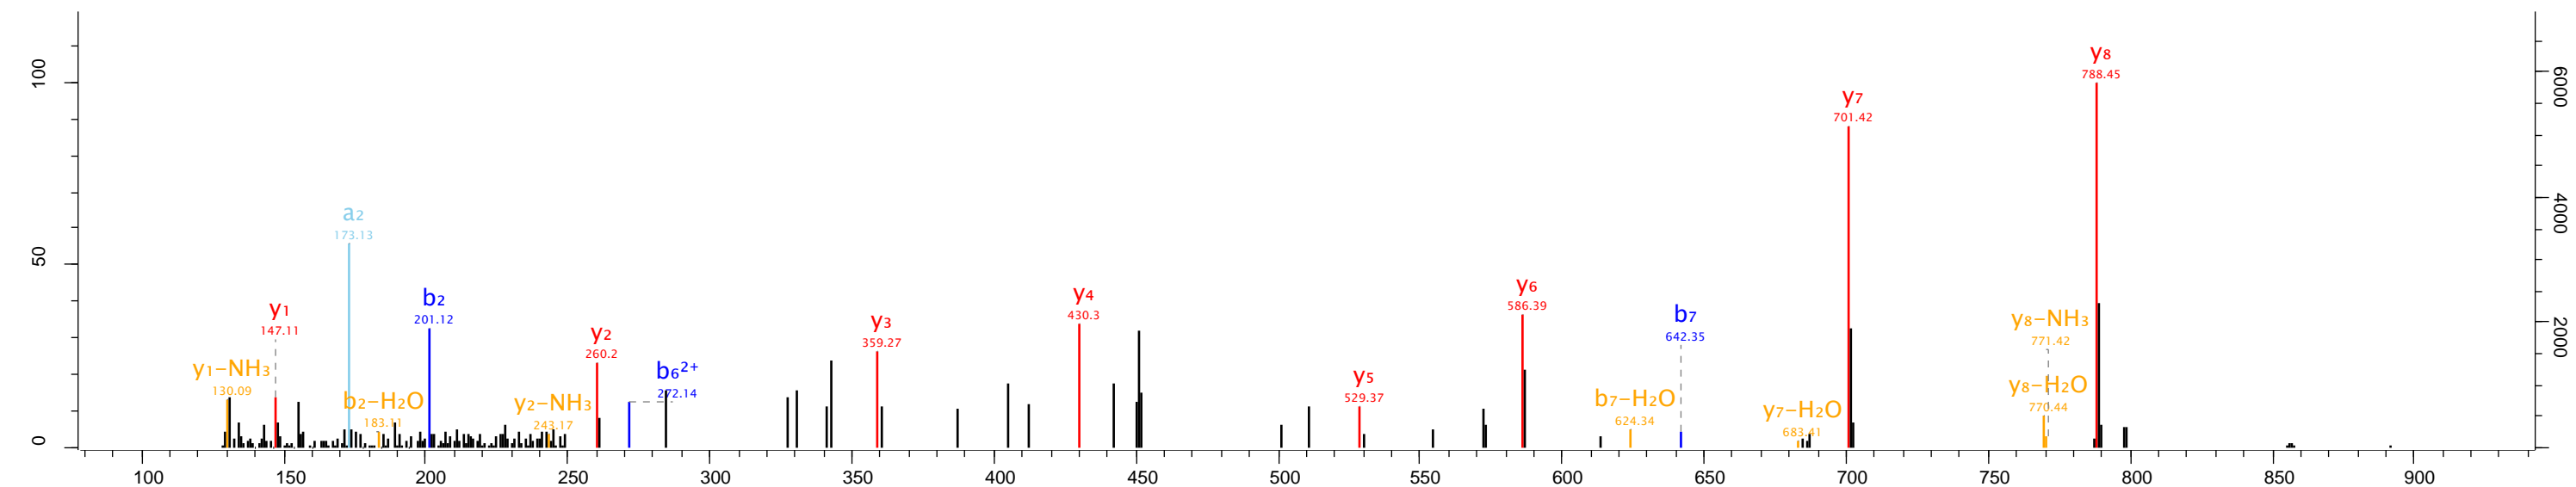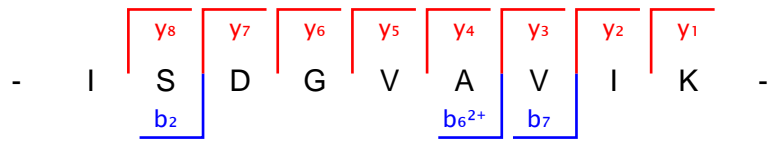

Raw file: 2015-01-05\_CL03\_XenEmb\_x2  
 Scan: 29410 Method: ITMS; HCD Score: 83.95 m/z: 457.79

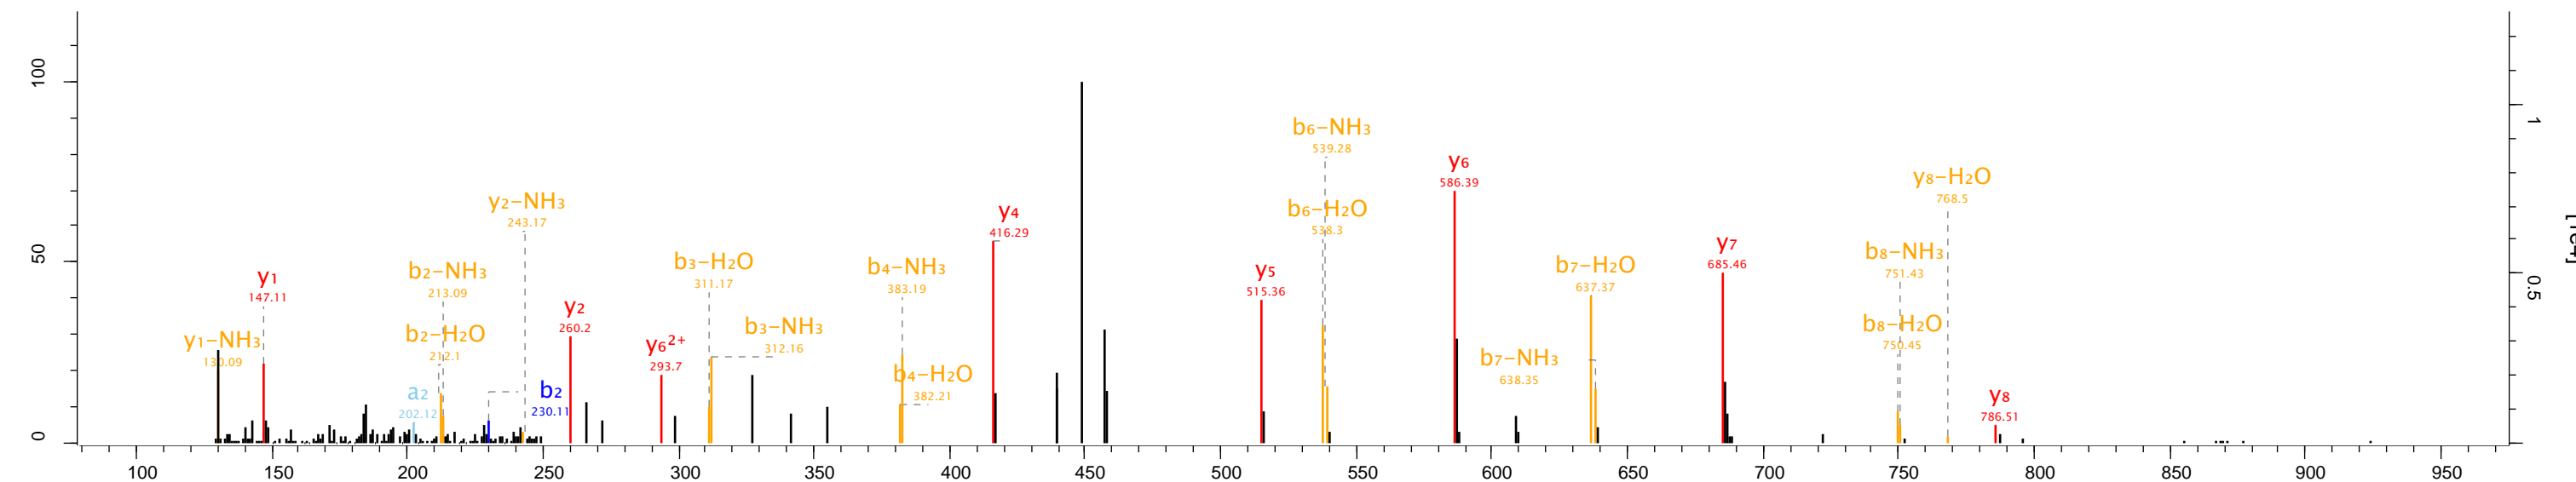

Raw file 2015-01-05\_CL03\_XenEmb\_x2 Scan 29412 Method ITMS; HCD Score 105.1 m/z 451.27

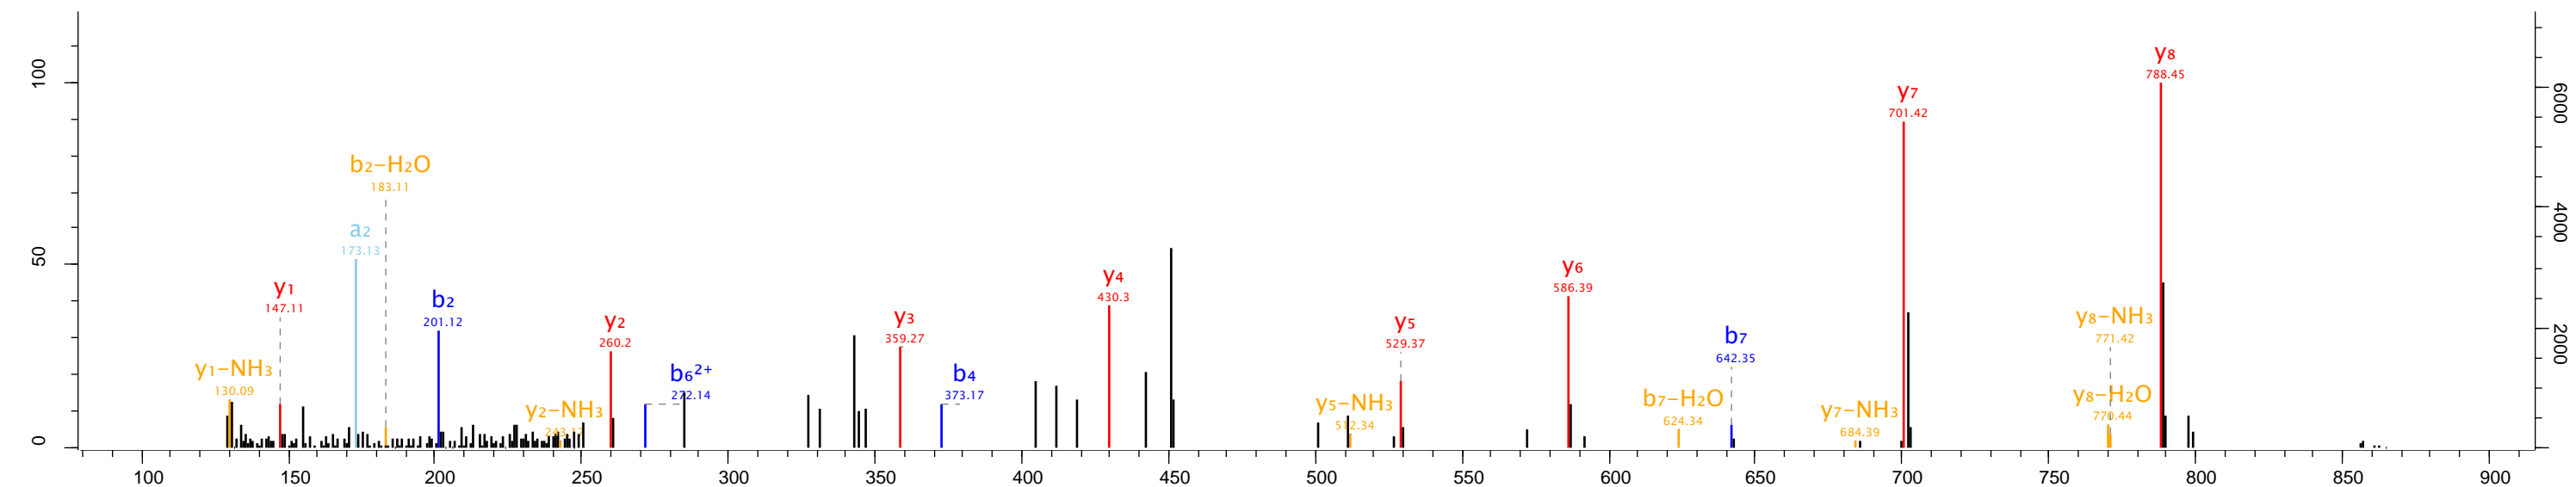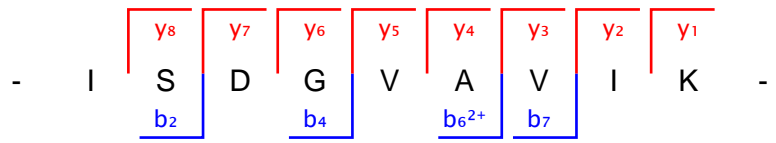



Raw file: 2015-01-05\_CL03\_XenEmb\_x2  
 Scan: 29475 Method: ITMS; HCD Score: 42.58 m/z: 666.02

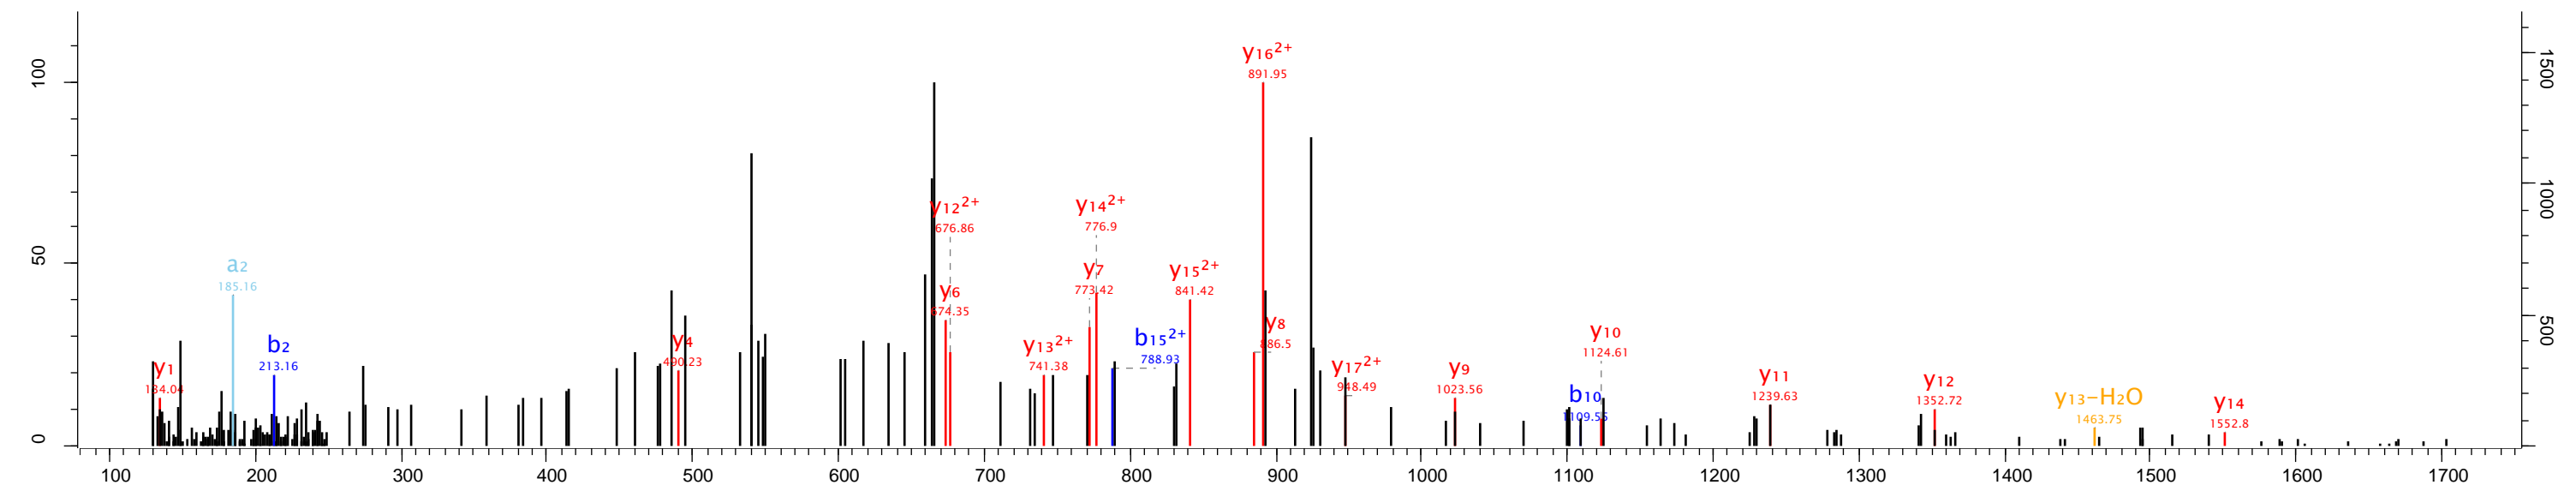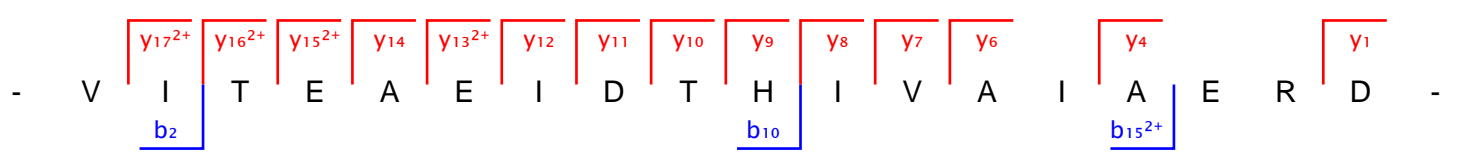

Raw file: 2015-01-05\_CL03\_XenEmb\_x2  
 Scan: 29495 Method: ITMS; HCD Score: 42.04 m/z: 662.33

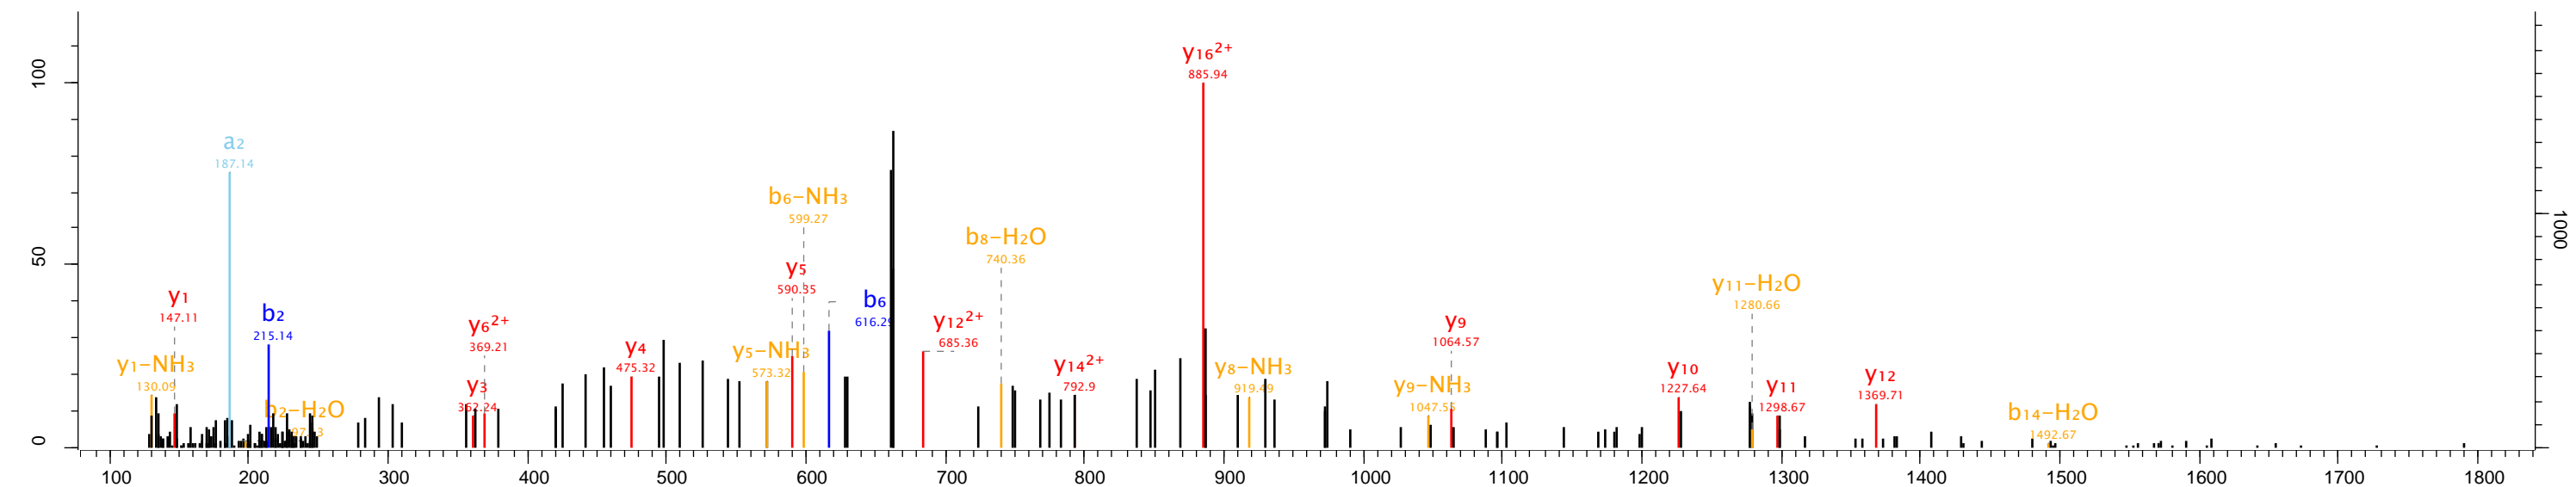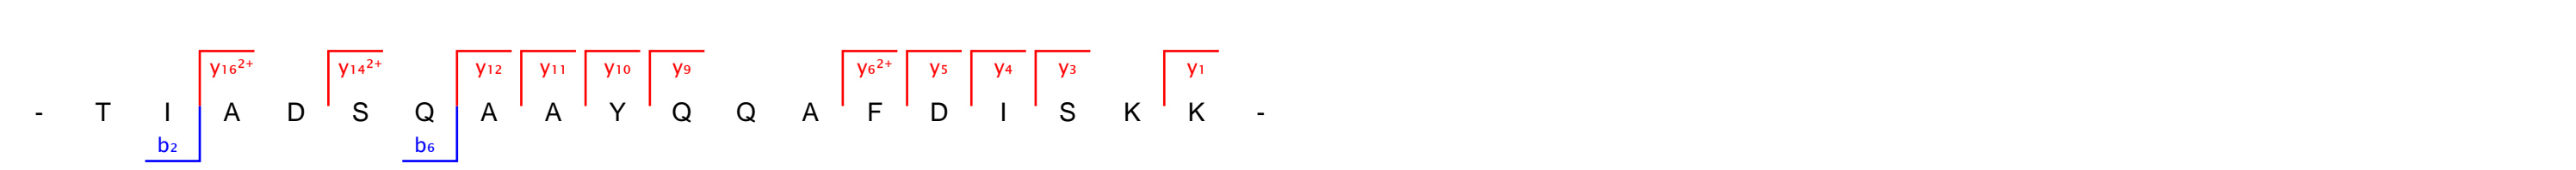

Raw file: 2015-01-05\_CL03\_XenEmb\_x2  
 Scan: 29528 Method: ITMS; HCD Score: 76.59 m/z: 666.02

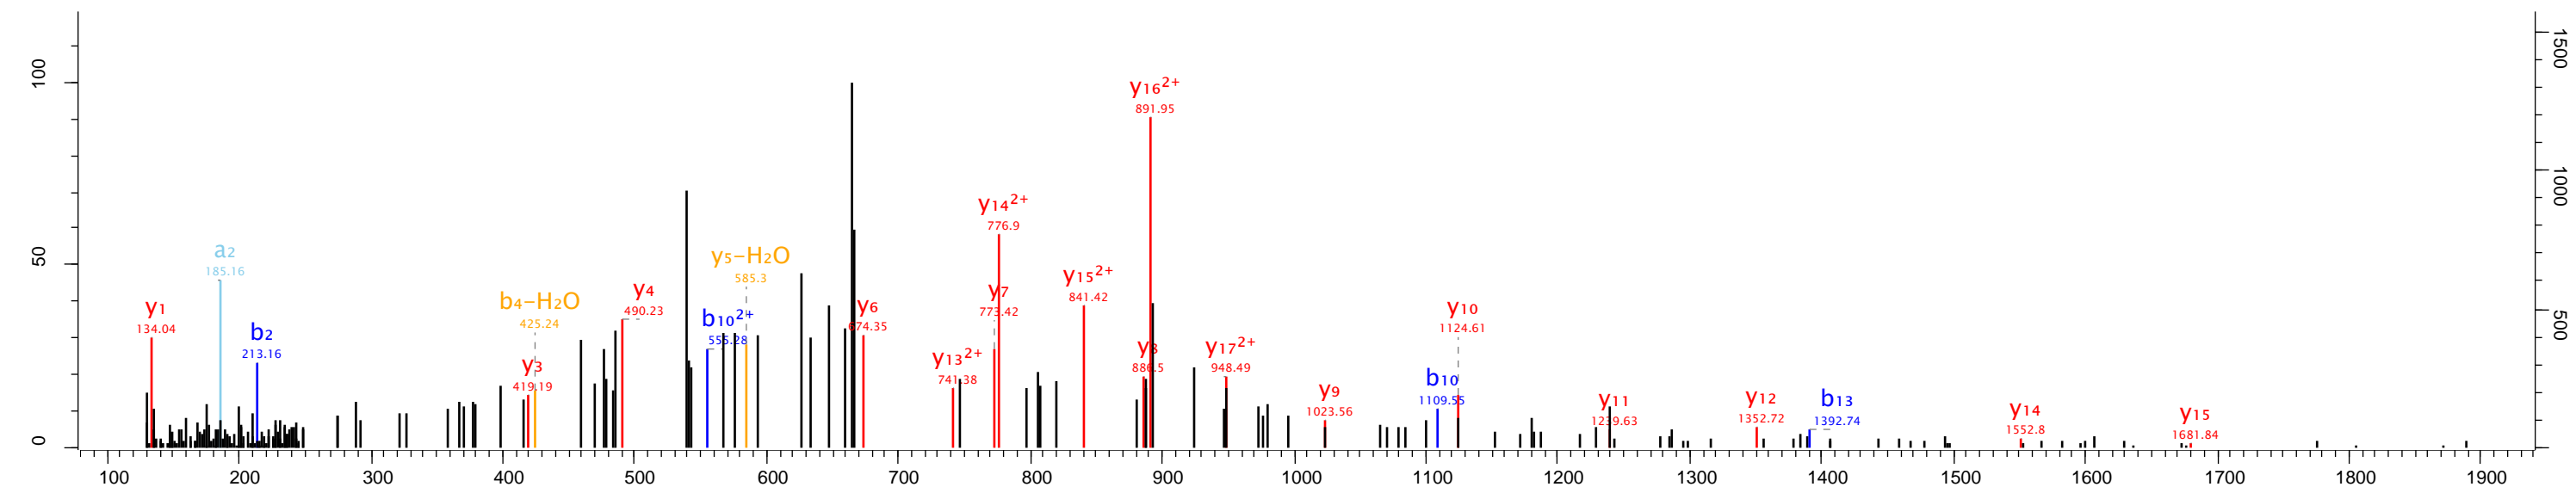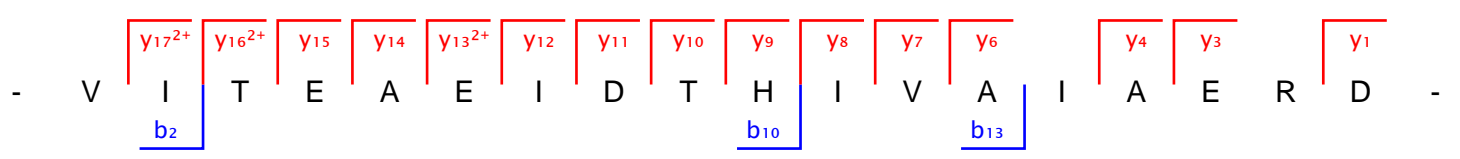

Spectral Annotation for Single-Peptide IDs in 16-cell Embryo using Q-OT-LIT

Raw file: 2015-01-05\_CL03\_XenEmb\_x2  
 Scan: 29548 Method: ITMS; HCD Score: 35.63 m/z: 665.69

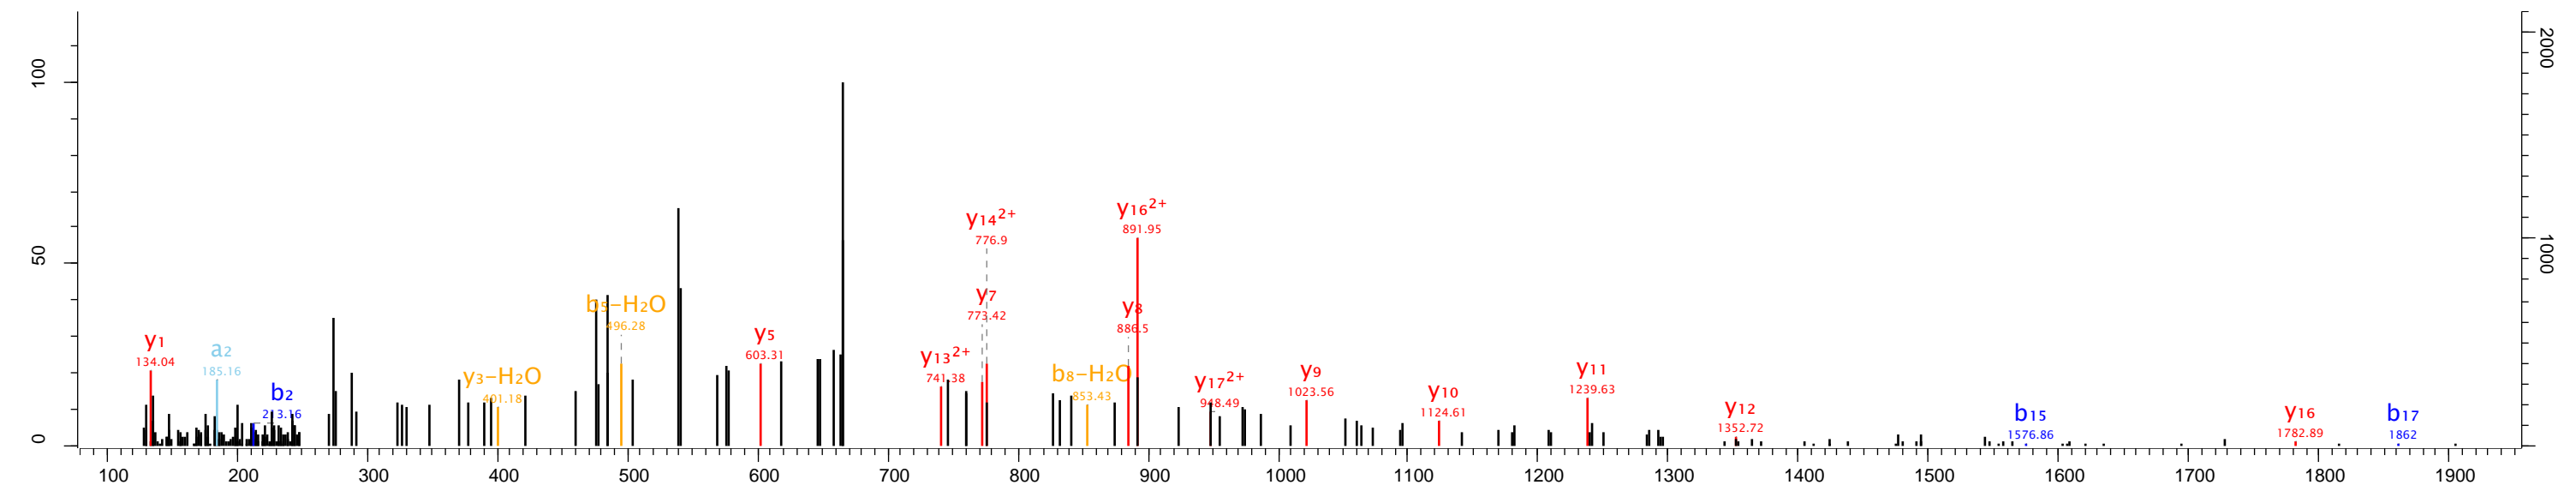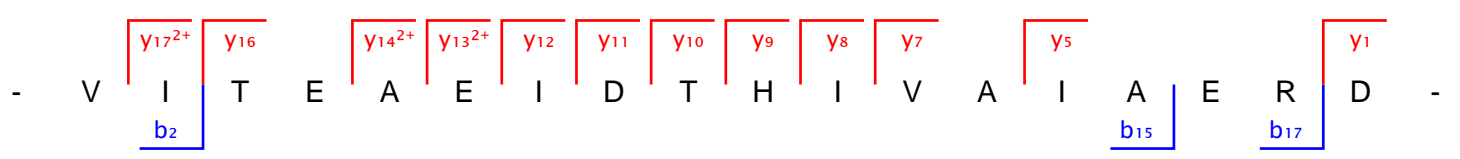

Raw file: 2015-01-05\_CL03\_XenEmb\_x2  
 Scan: 29641  
 Method: ITMS; HCD  
 Score: 34.44  
 m/z: 772.86

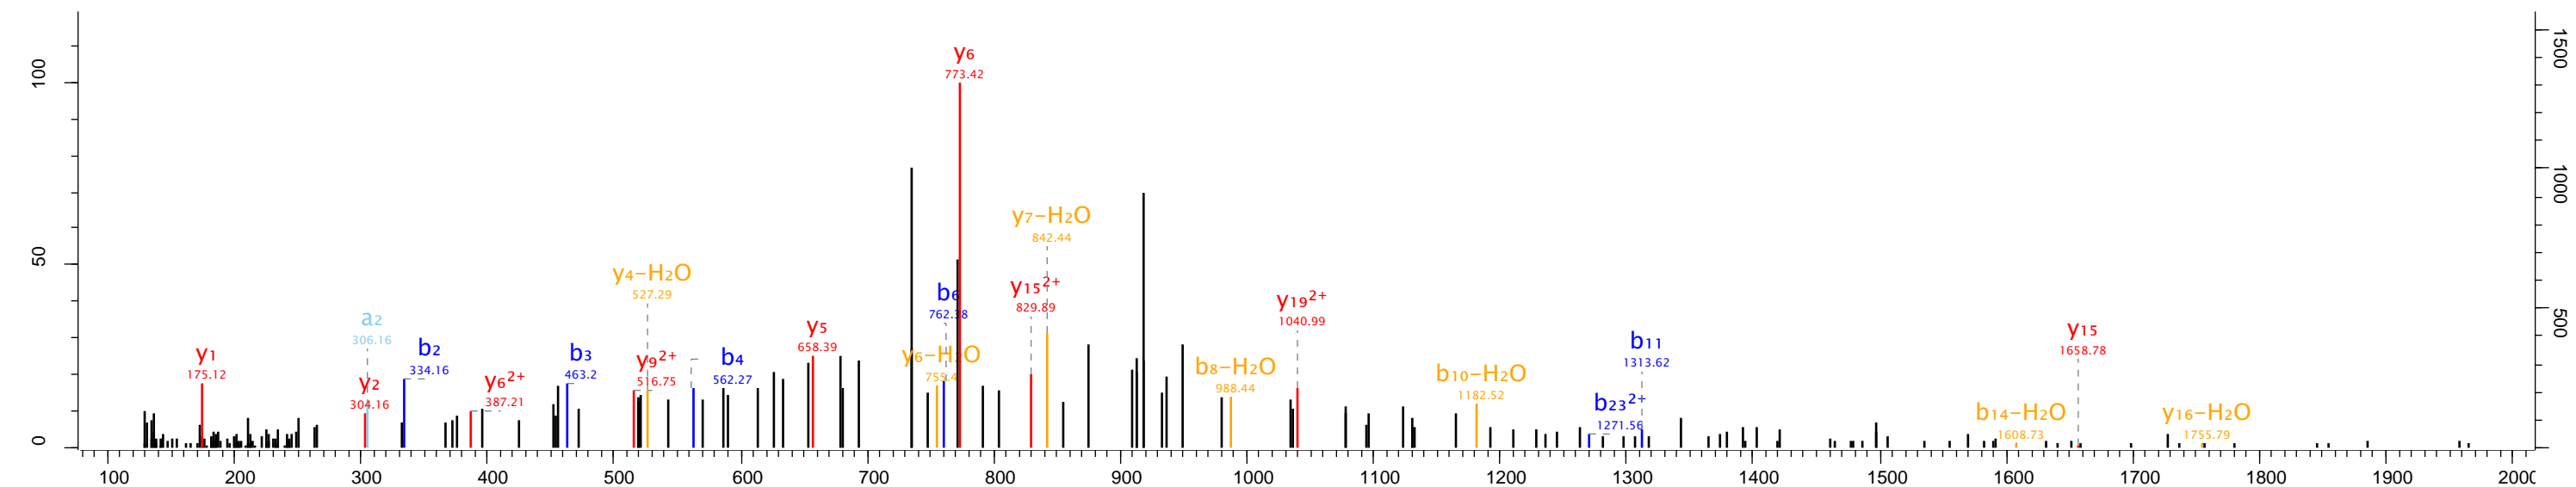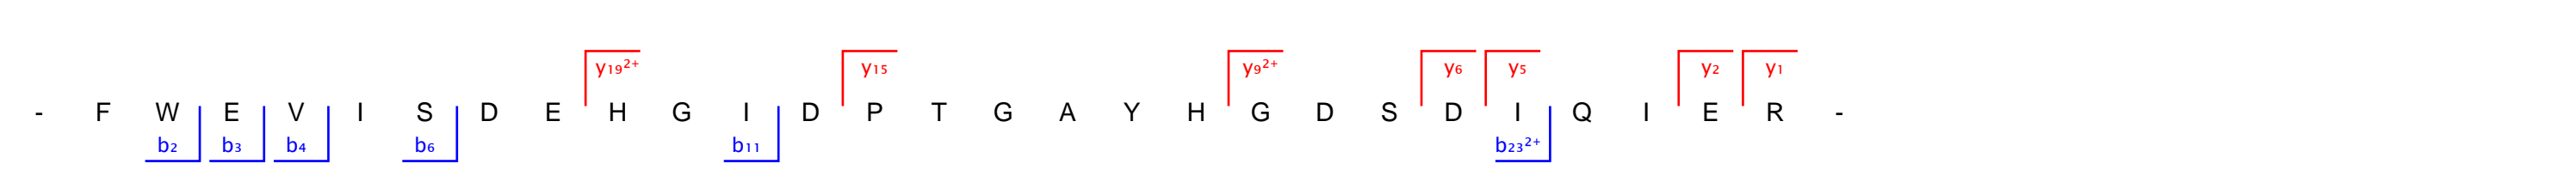

Raw file: 2015-01-05\_CL03\_XenEmb\_x2  
 Scan: 29704 Method: ITMS; HCD Score: 49.77 m/z: 772.86

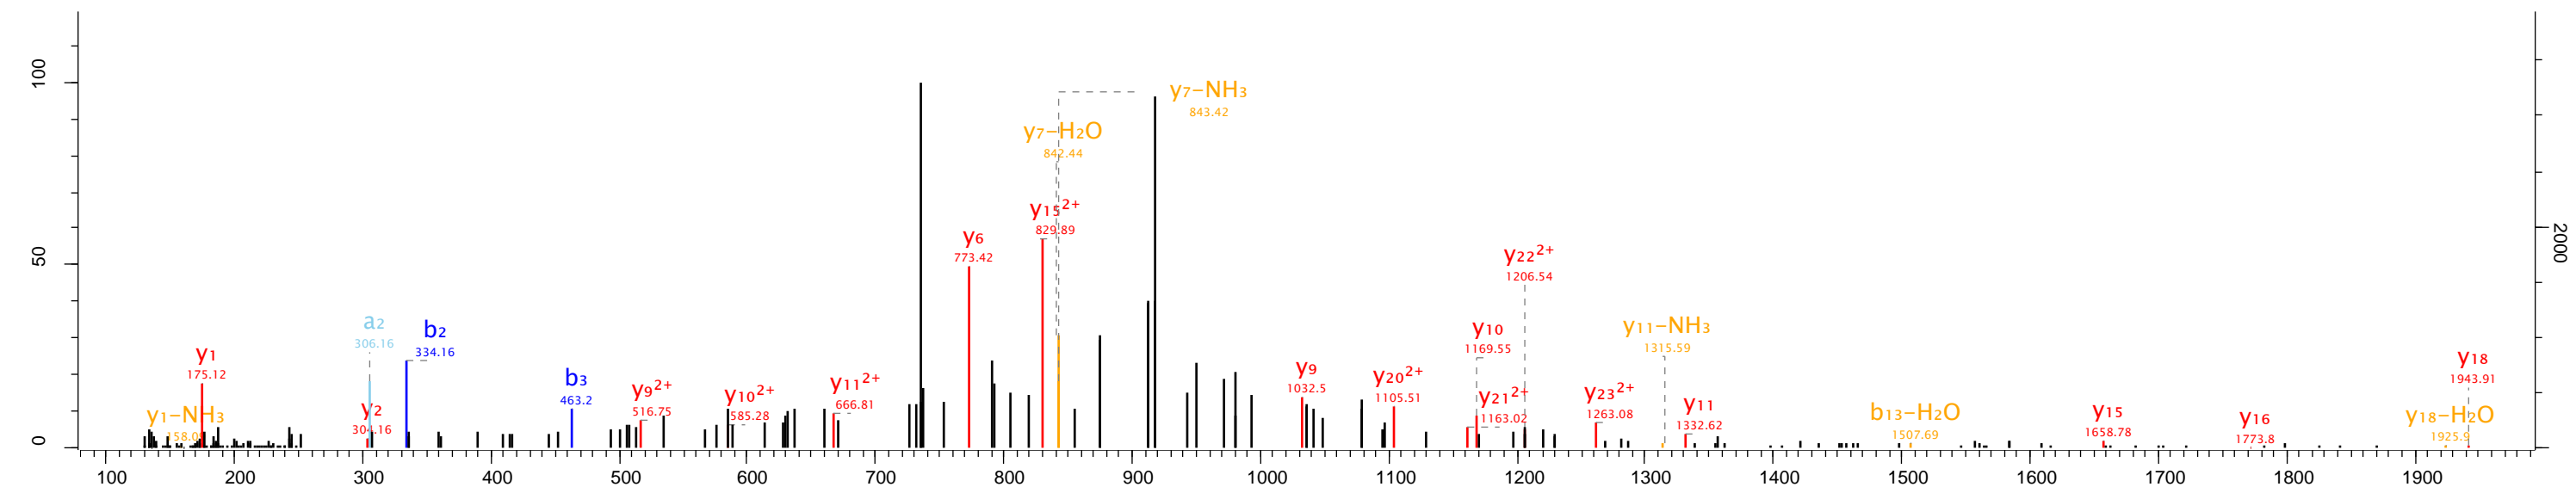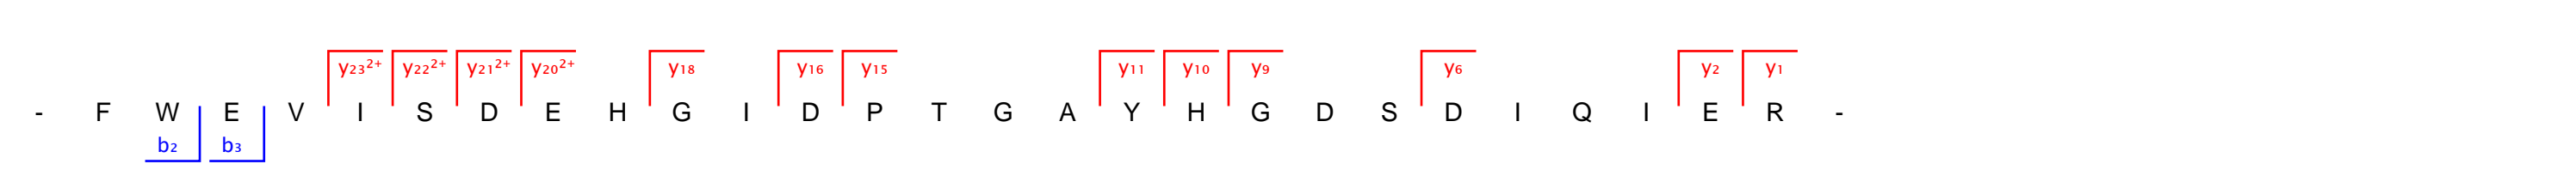

Raw file 2015-01-05\_CL03\_XenEmb\_x2 Scan 29762 Method ITMS; HCD Score 69.99 m/z 777.65

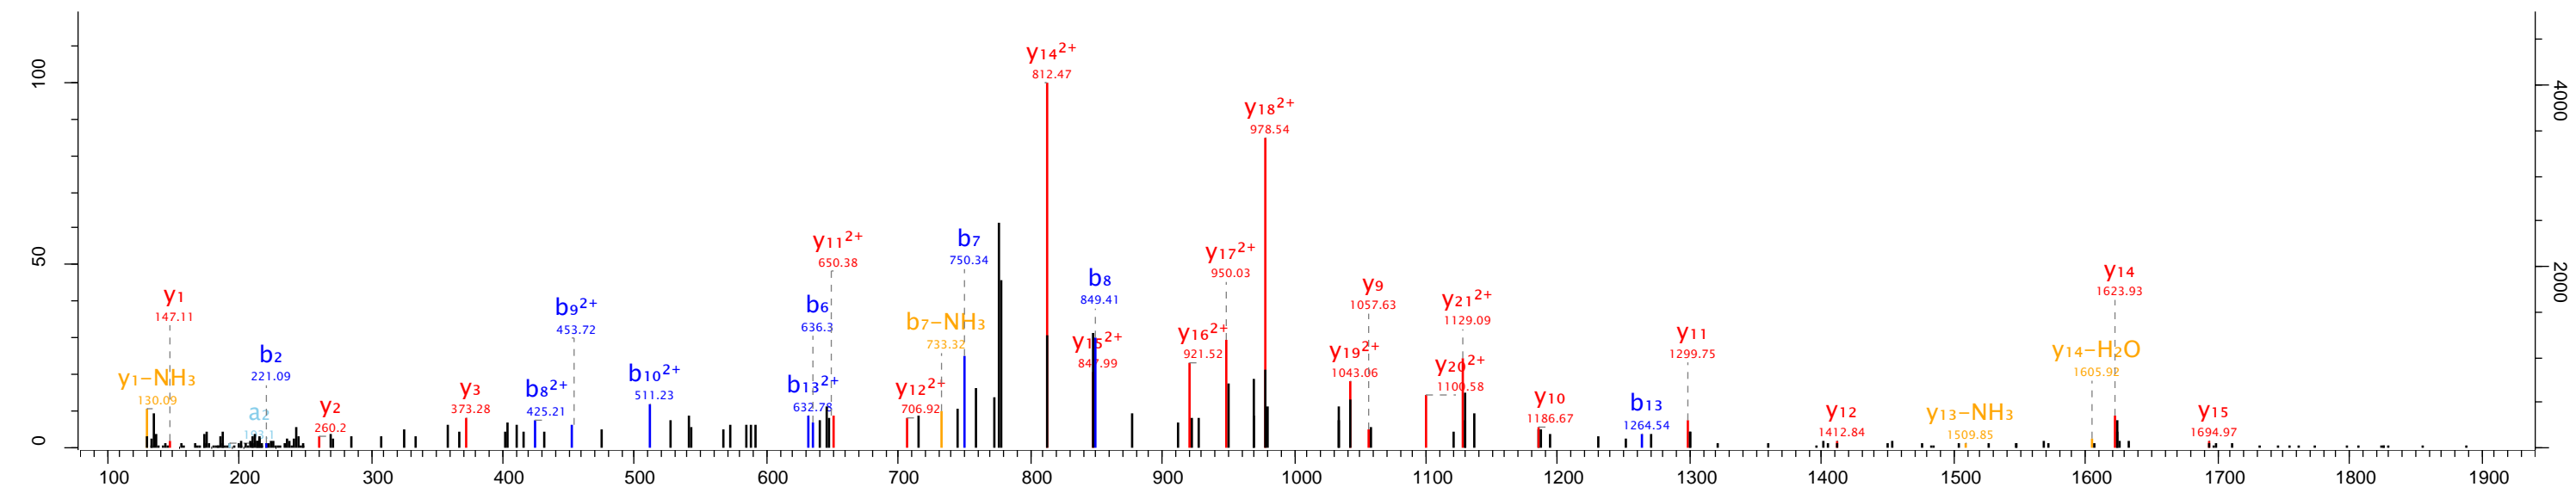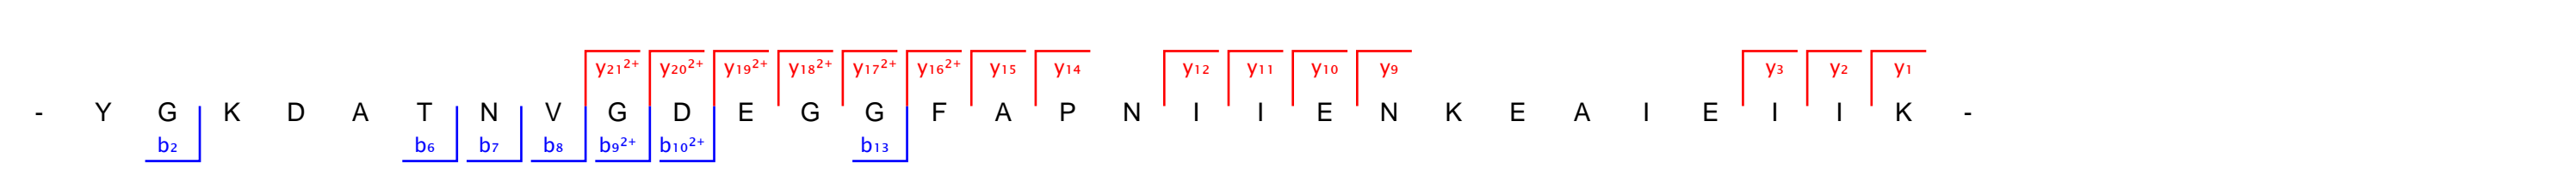

Raw file: 2015-01-05\_CL03\_XenEmb\_x2  
 Scan: 29867 Method: ITMS; HCD Score: 55.09 m/z: 661.32

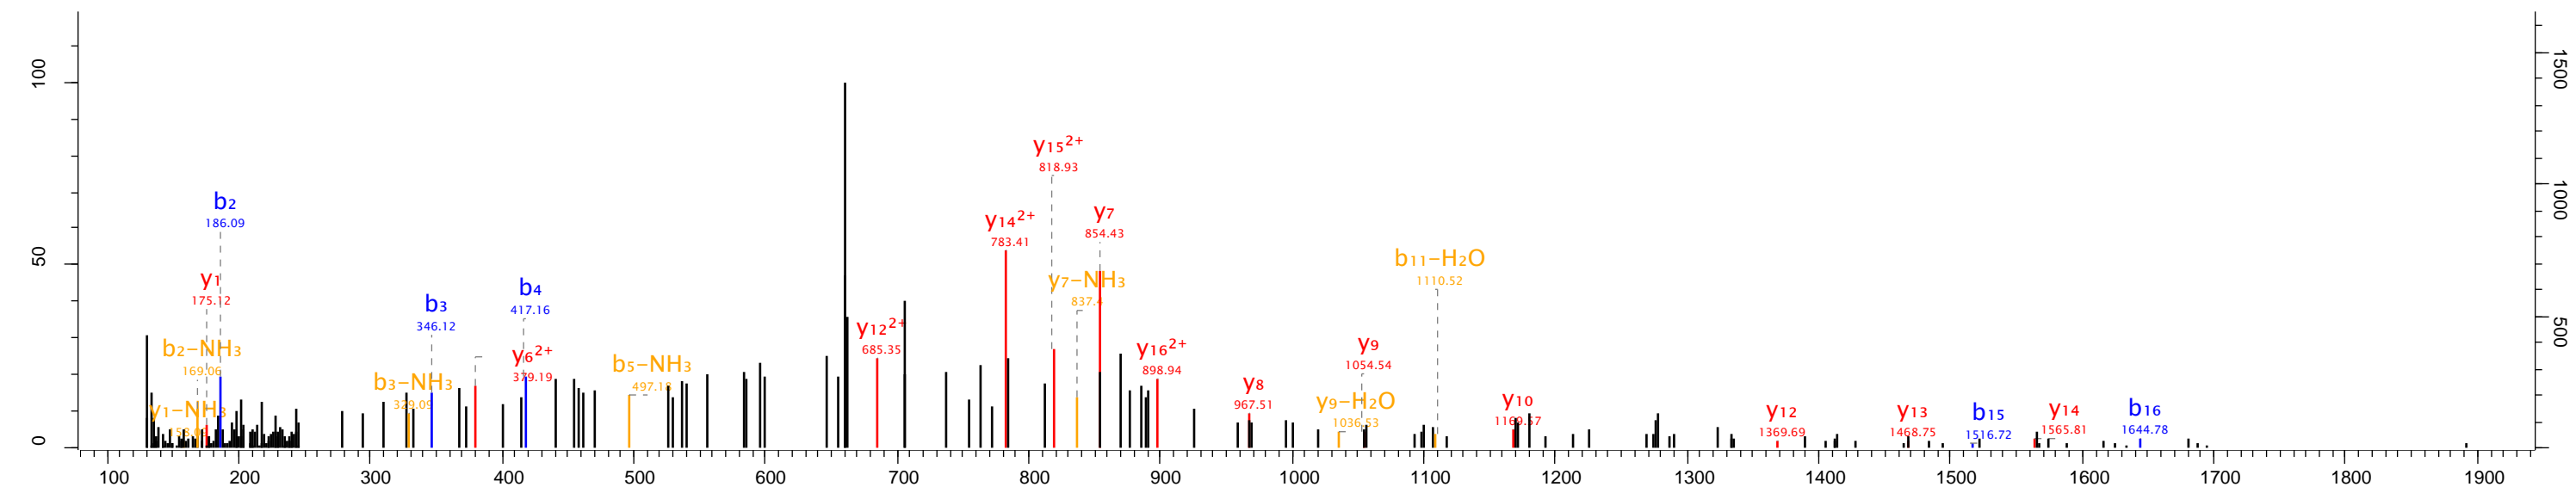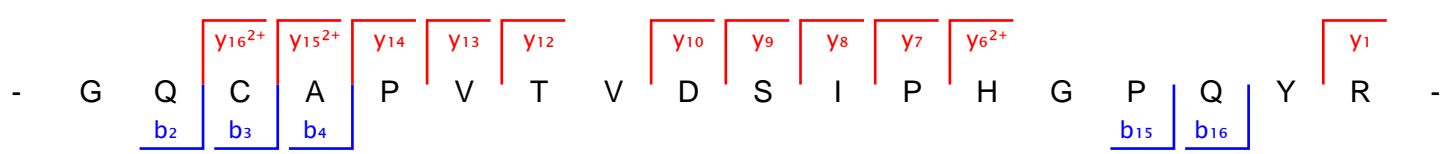

Spectral Annotation for Single-Peptide IDs in 16-cell Embryo using Q-OT-LIT



Raw file 2015-01-05\_CL03\_XenEmb\_x2 Scan 29872 Method ITMS; HCD Score 47.9 m/z 654

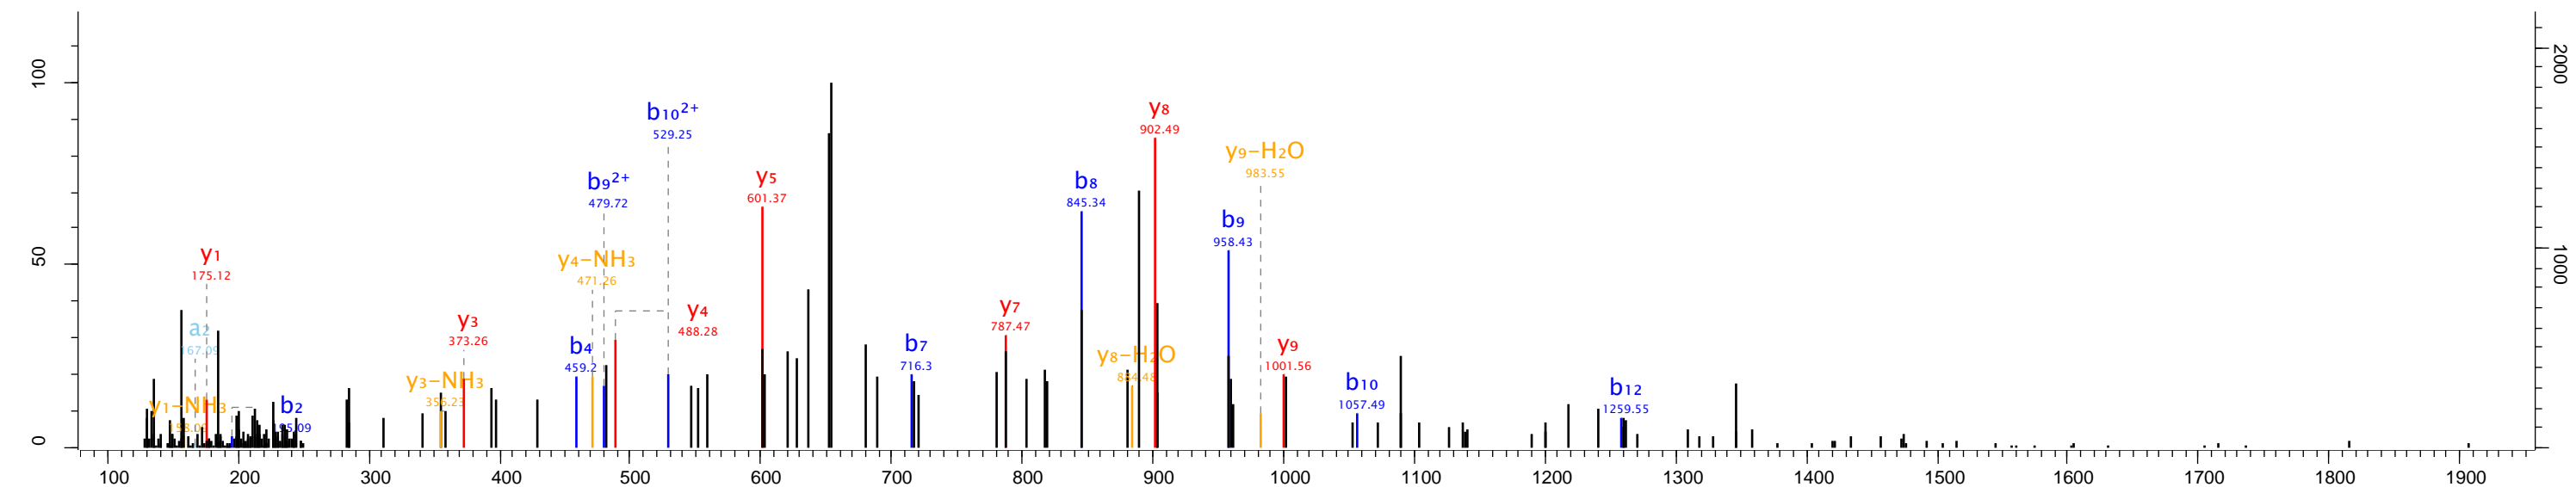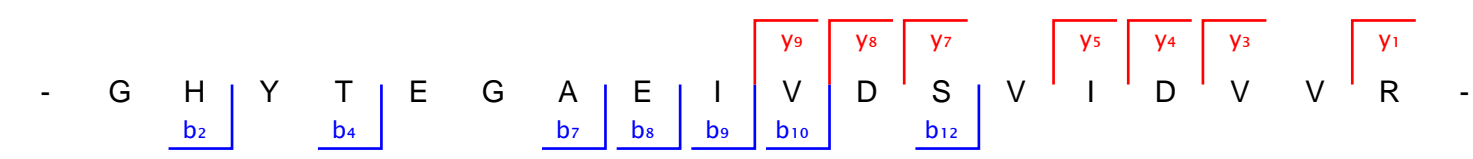

Raw file 2015-01-05\_CL03\_XenEmb\_x2 Scan 29908 Method ITMS; HCD Score 43.7 m/z 772.61

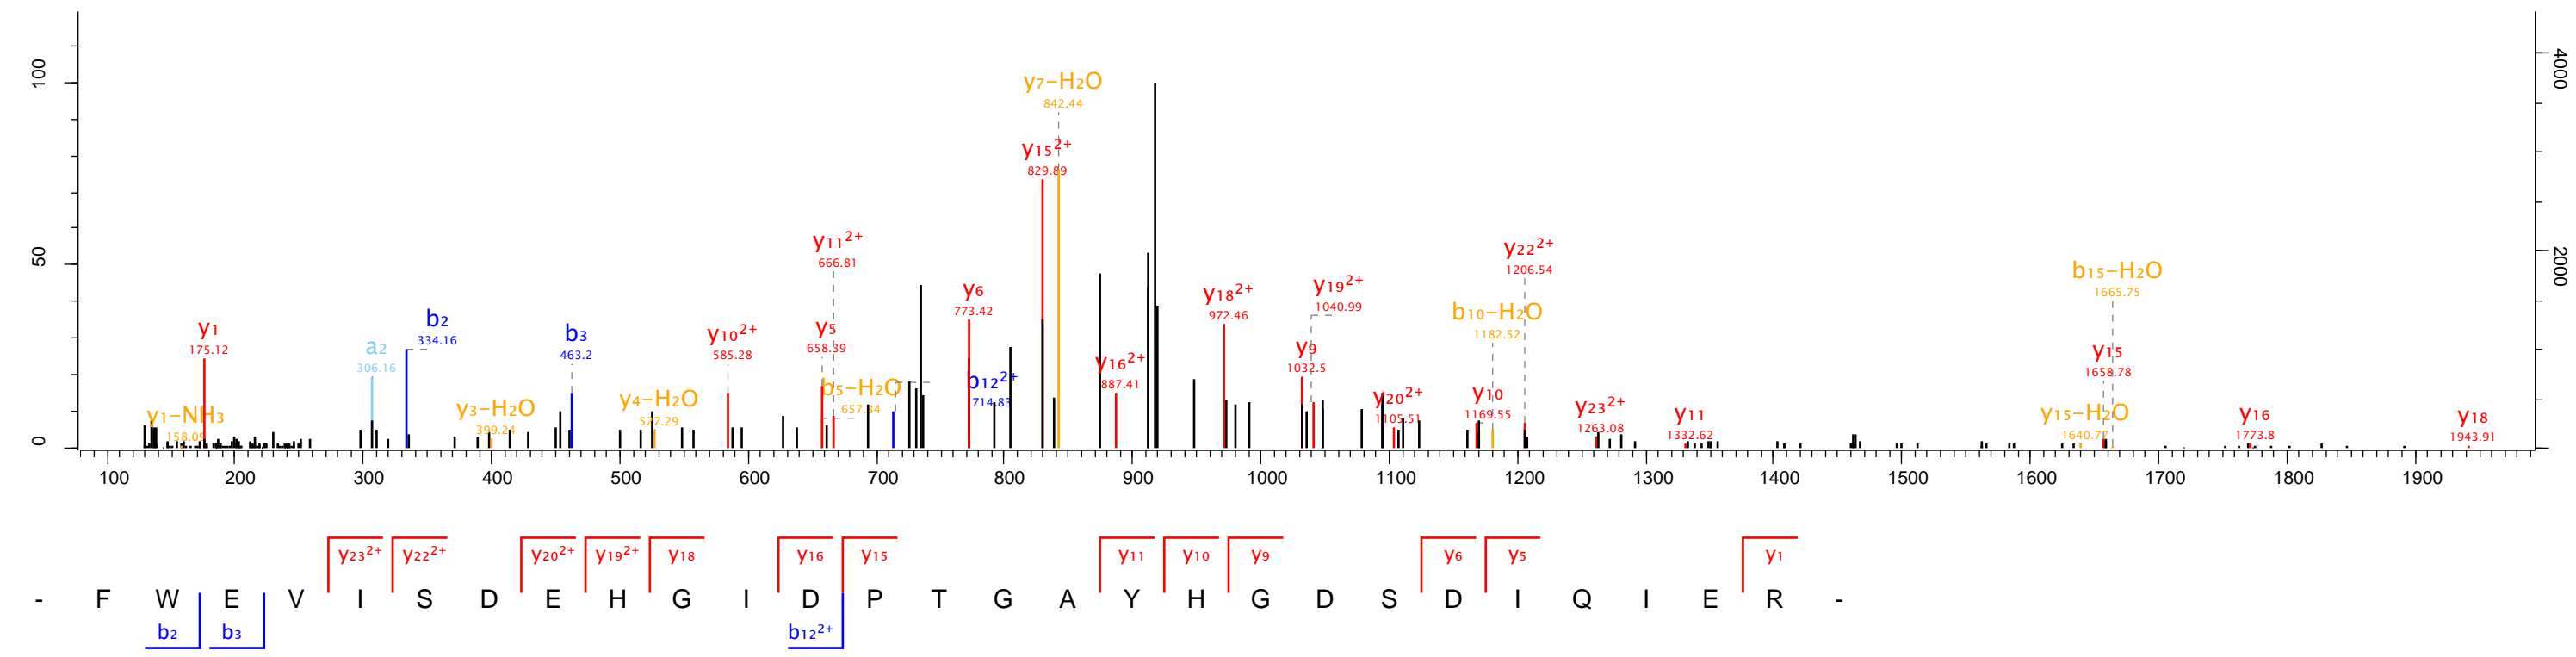

Raw file 2015-01-05\_CL03\_XenEmb\_x2 Scan 29989 Method ITMS; HCD Score 77.55 m/z 654.01

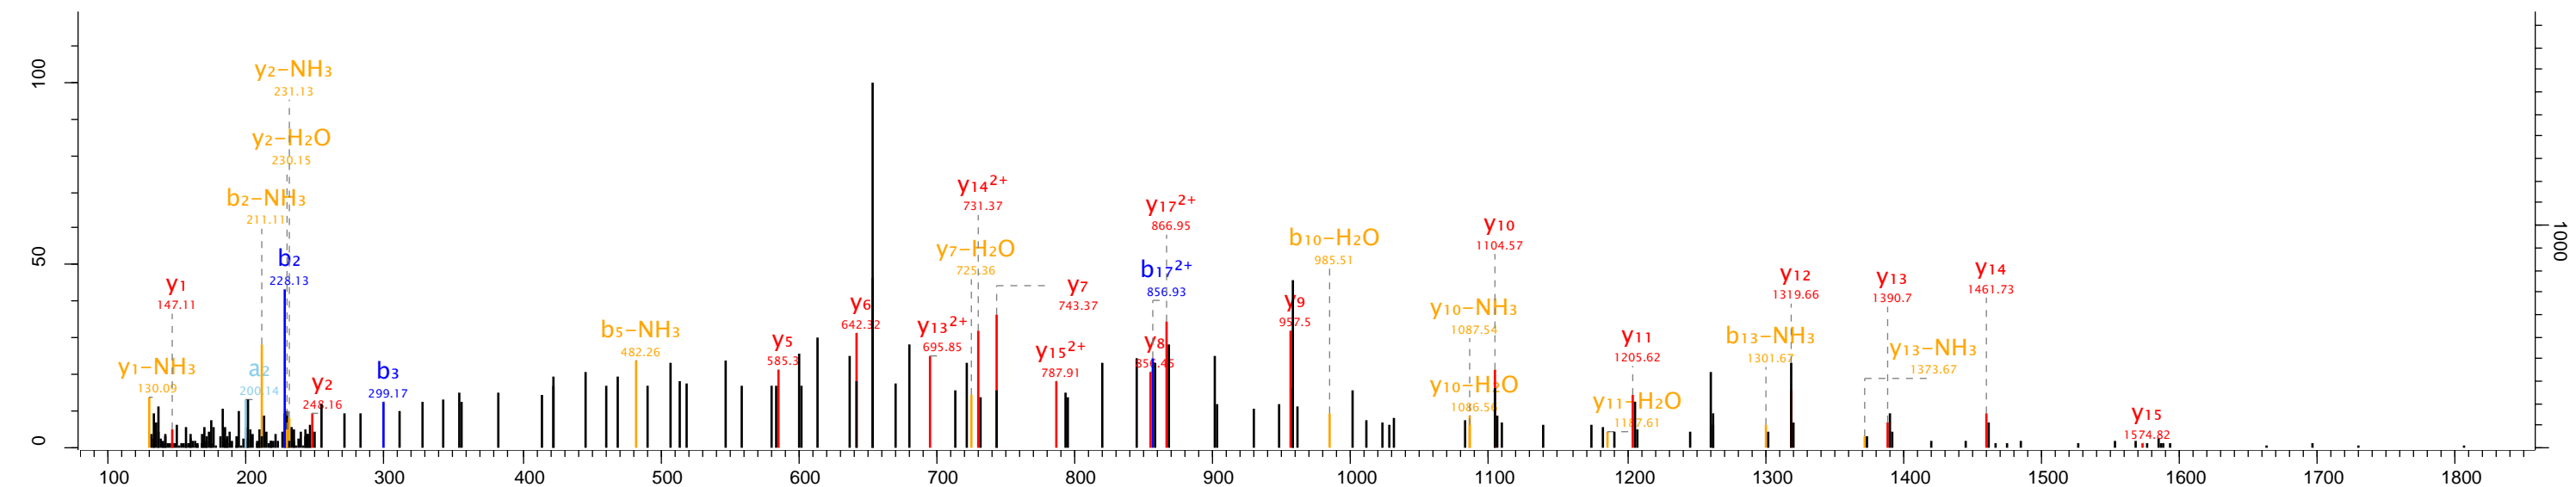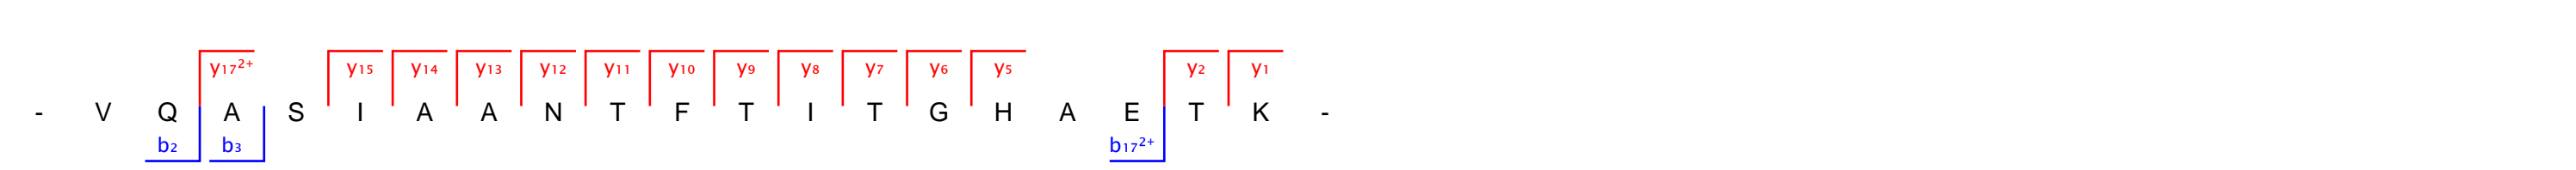

Spectral Annotation for Single-Peptide IDs in 16-cell Embryo using Q-OT-LIT

Raw file 2015-01-05\_CL03\_XenEmb\_x2 Scan 30023 Method ITMS; HCD Score 59.55 m/z 772.61

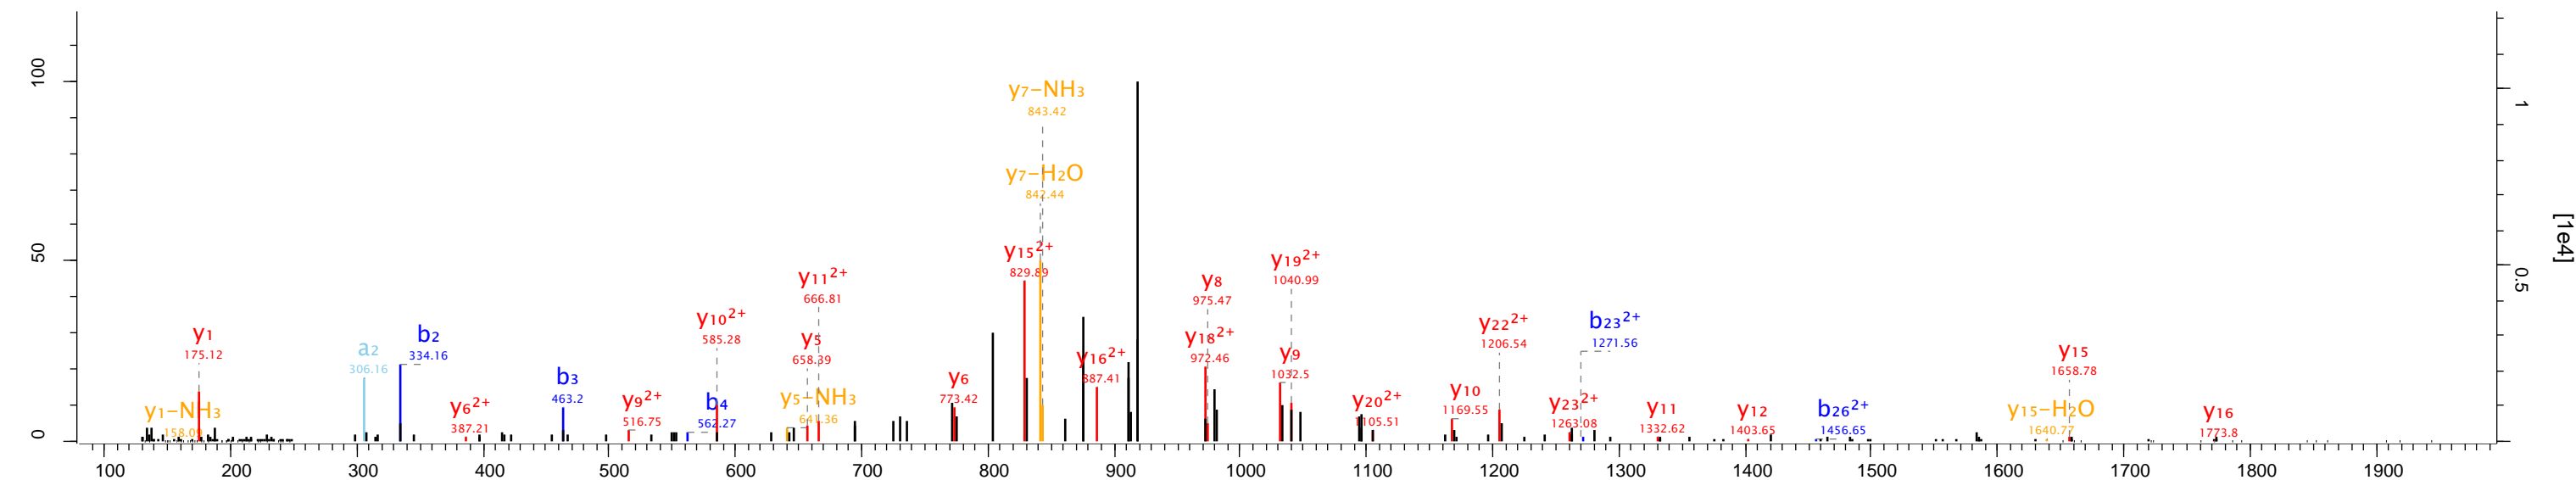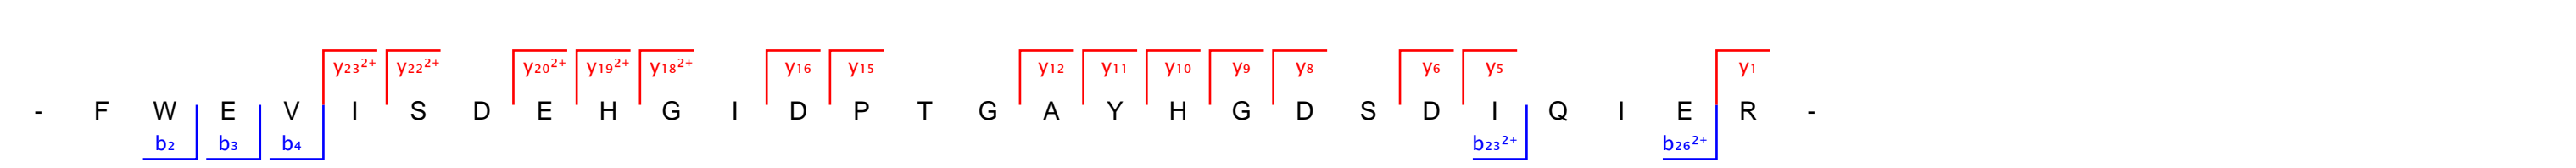

Raw file: 2015-01-05\_CL03\_XenEmb\_x2  
 Scan: 30029 Method: ITMS; HCD Score: 33.67 m/z: 696.32

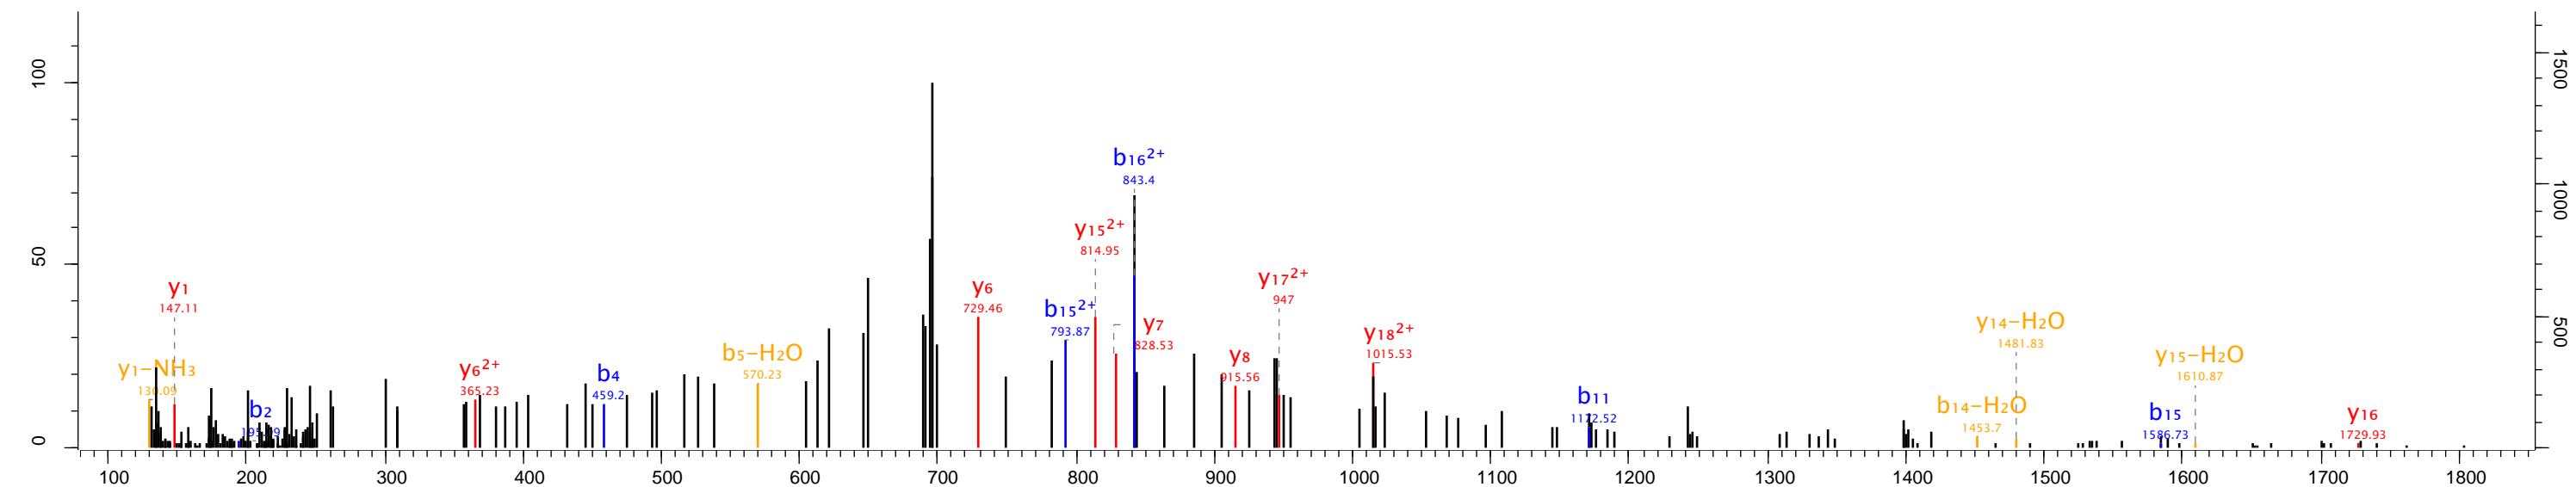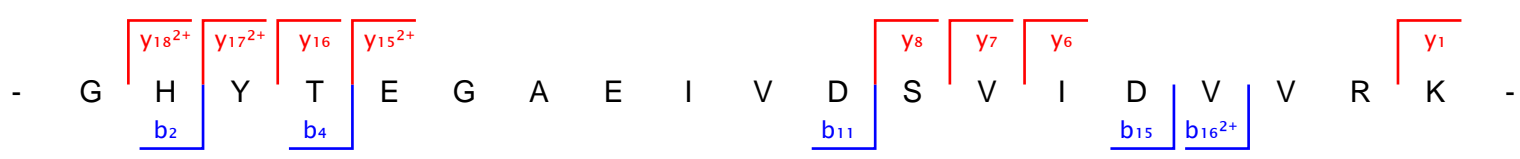

Spectral Annotation for Single-Peptide IDs in 16-cell Embryo using Q-OT-LIT

Raw file: 2015-01-05\_CL03\_XenEmb\_x2  
 Scan: 30044 Method: ITMS; HCD Score: 86.08 m/z: 772.61

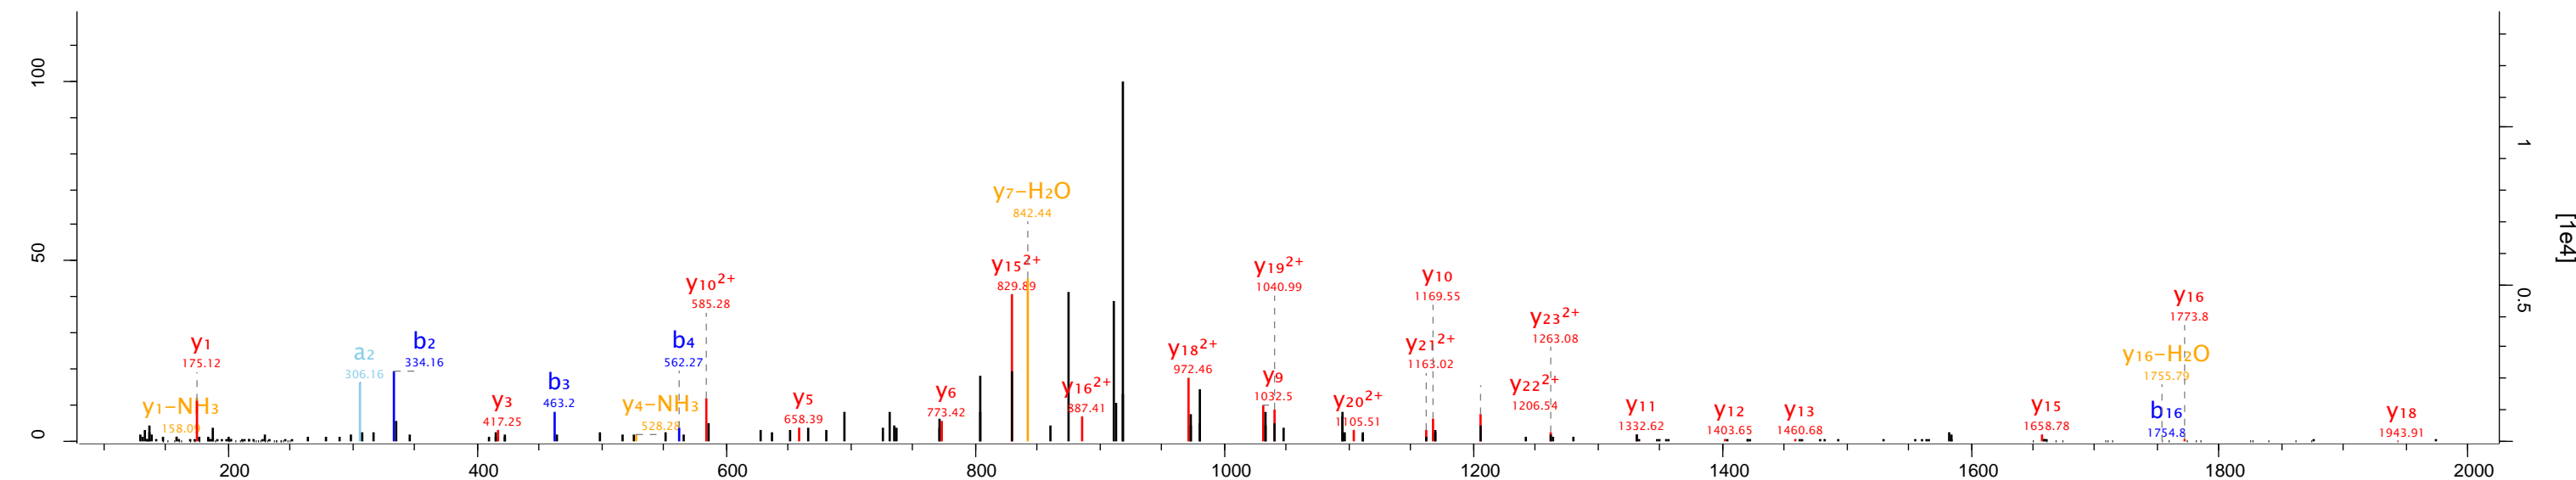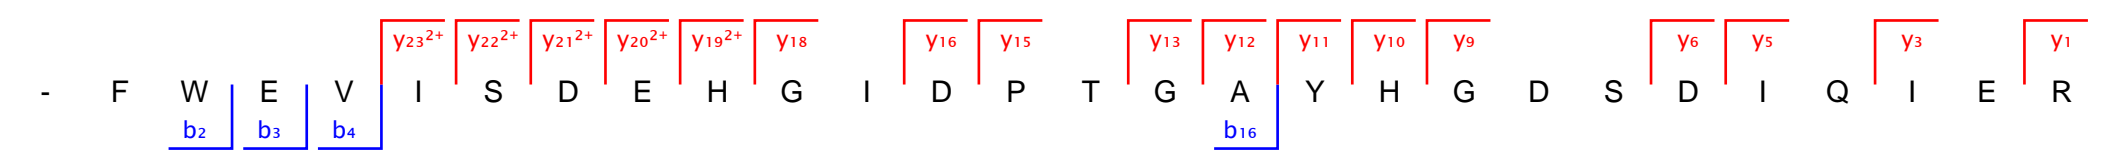

Raw file 2015-01-05\_CL03\_XenEmb\_x2 Scan 30062 Method ITMS; HCD Score 69.7 m/z 772.61

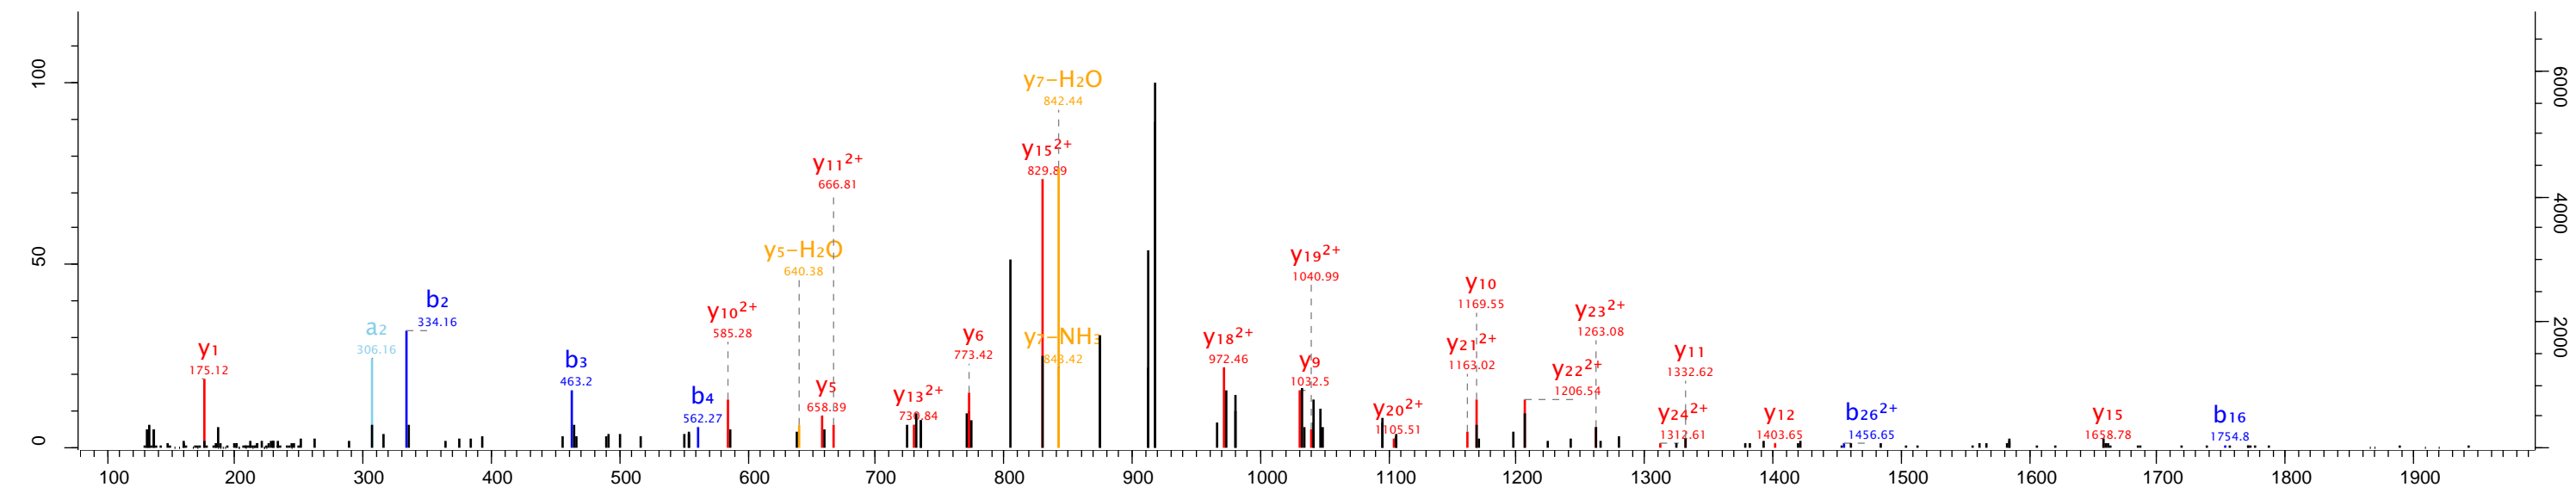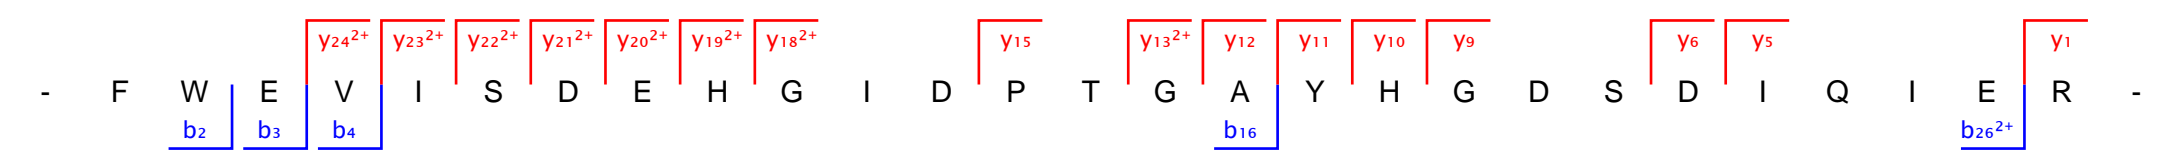

Raw file: 2015-01-05\_CL03\_XenEmb\_x2  
 Scan: 30080  
 Method: ITMS; HCD  
 Score: 84.5  
 m/z: 516.3

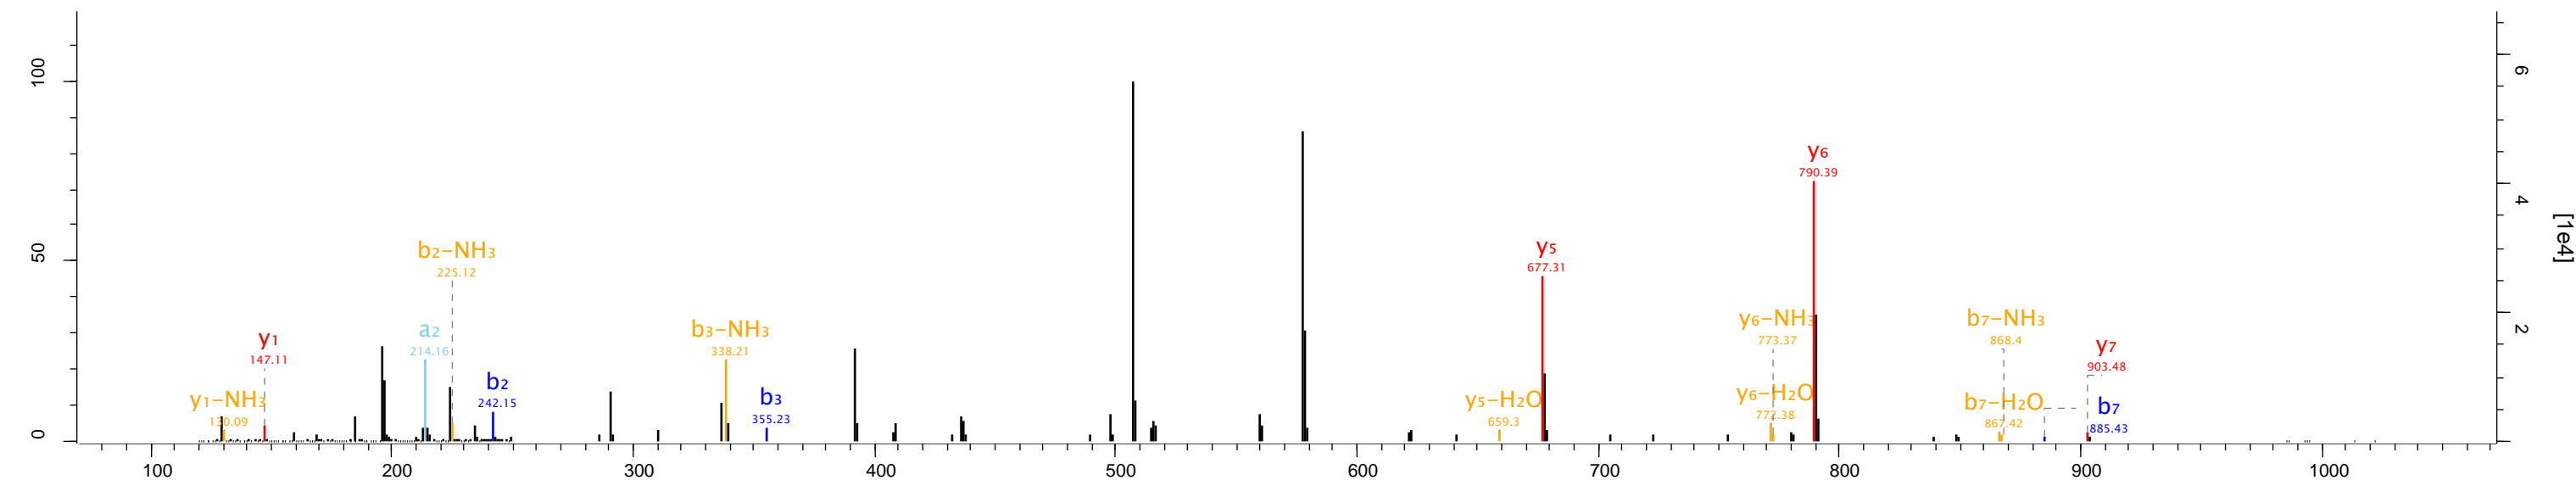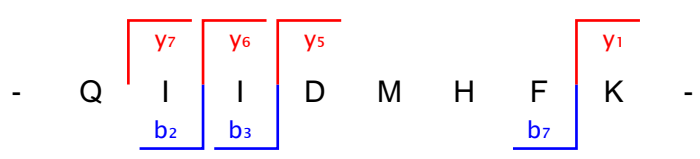



Raw file: 2015-01-05\_CL03\_XenEmb\_x2  
 Scan: 30213  
 Method: ITMS; HCD  
 Score: 80.41  
 m/z: 756.65

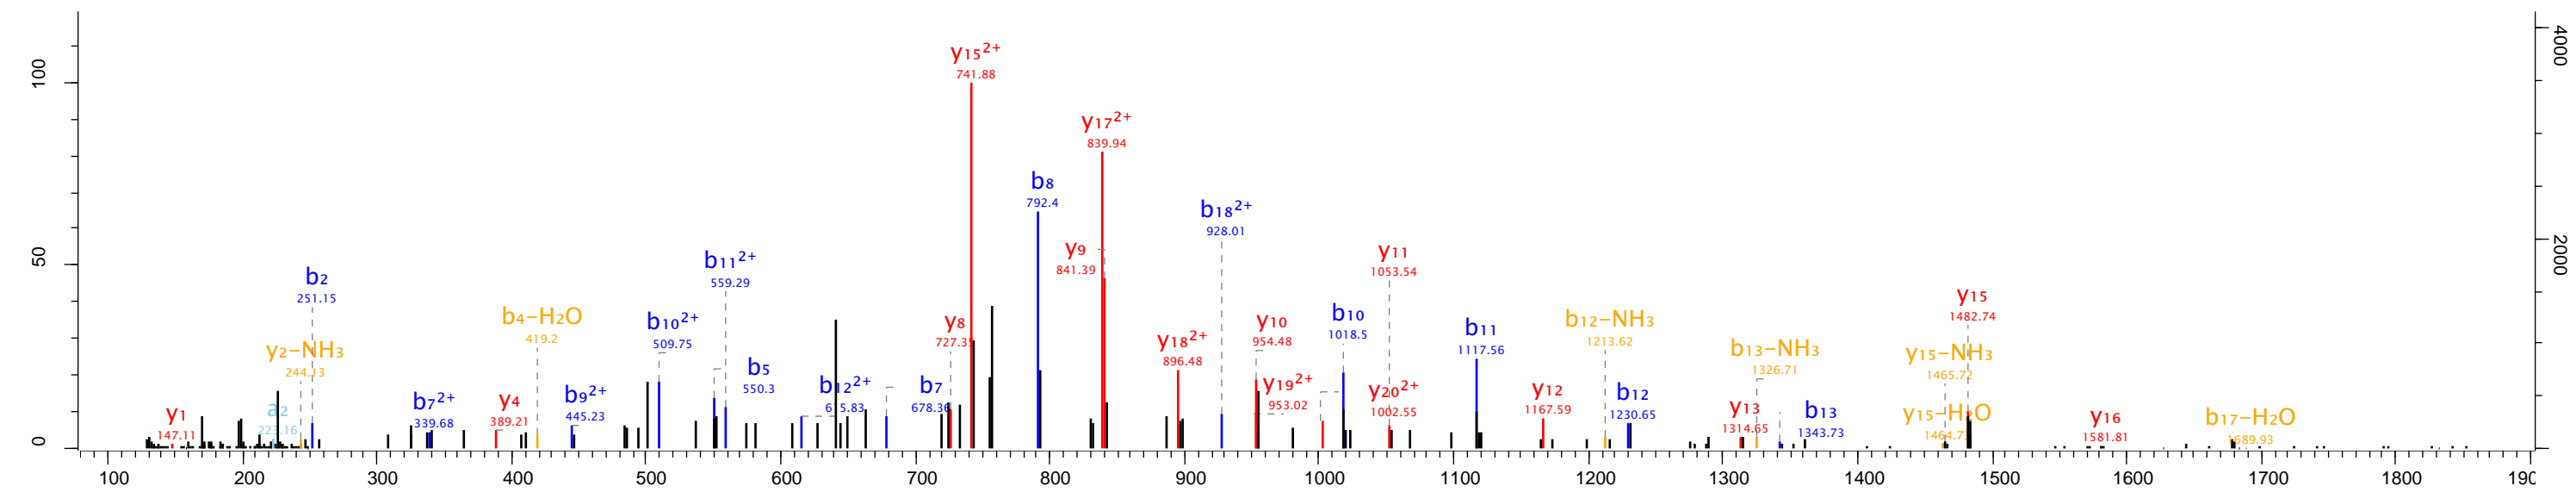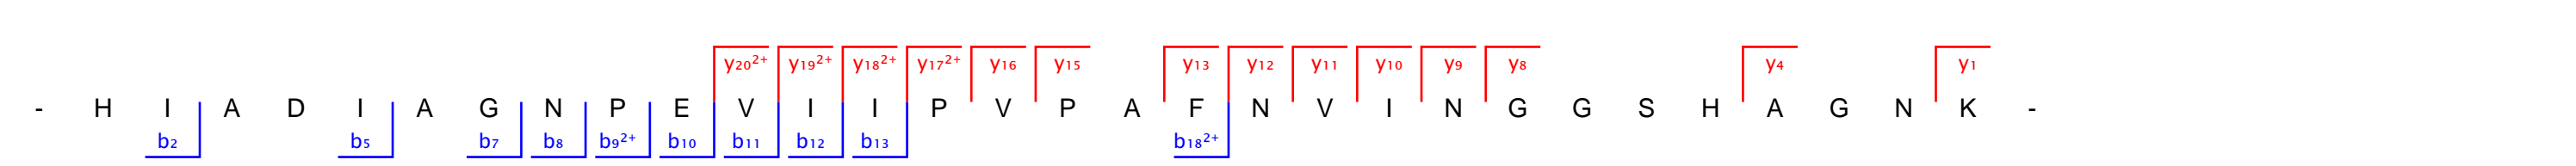

Raw file: 2015-01-05\_CL03\_XenEmb\_x2  
 Scan: 30282  
 Method: ITMS; HCD  
 Score: 85.86  
 m/z: 518.77

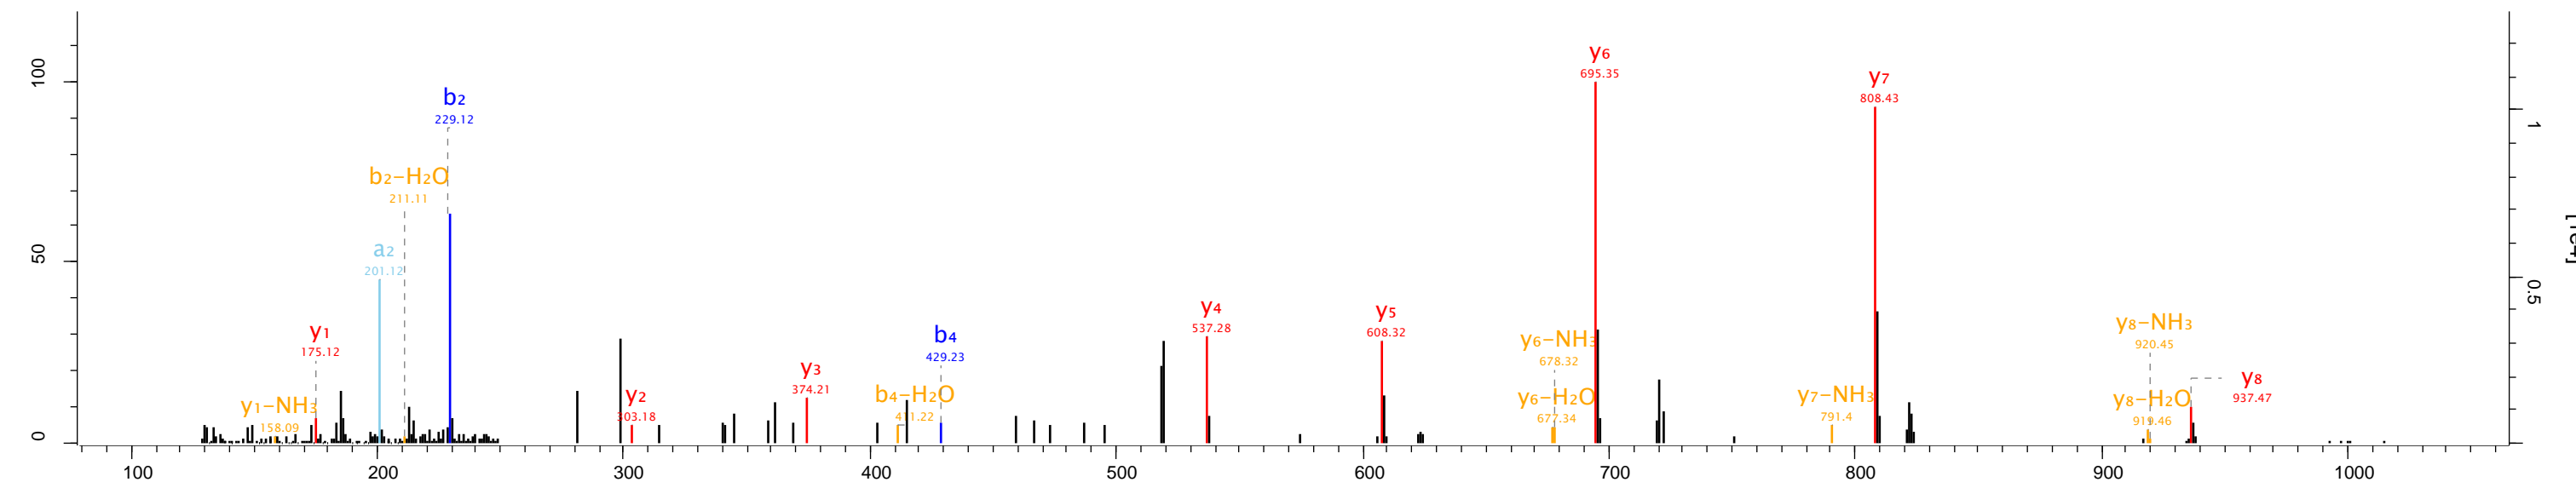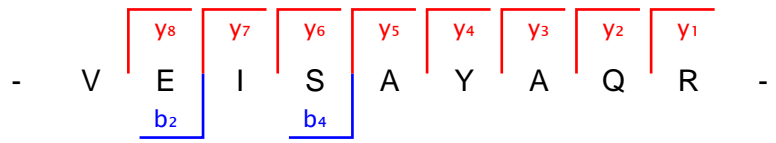

Raw file: 2015-01-05\_CL03\_XenEmb\_x2  
 Scan: 30384  
 Method: ITMS; HCD  
 Score: 60.56  
 m/z: 667.36

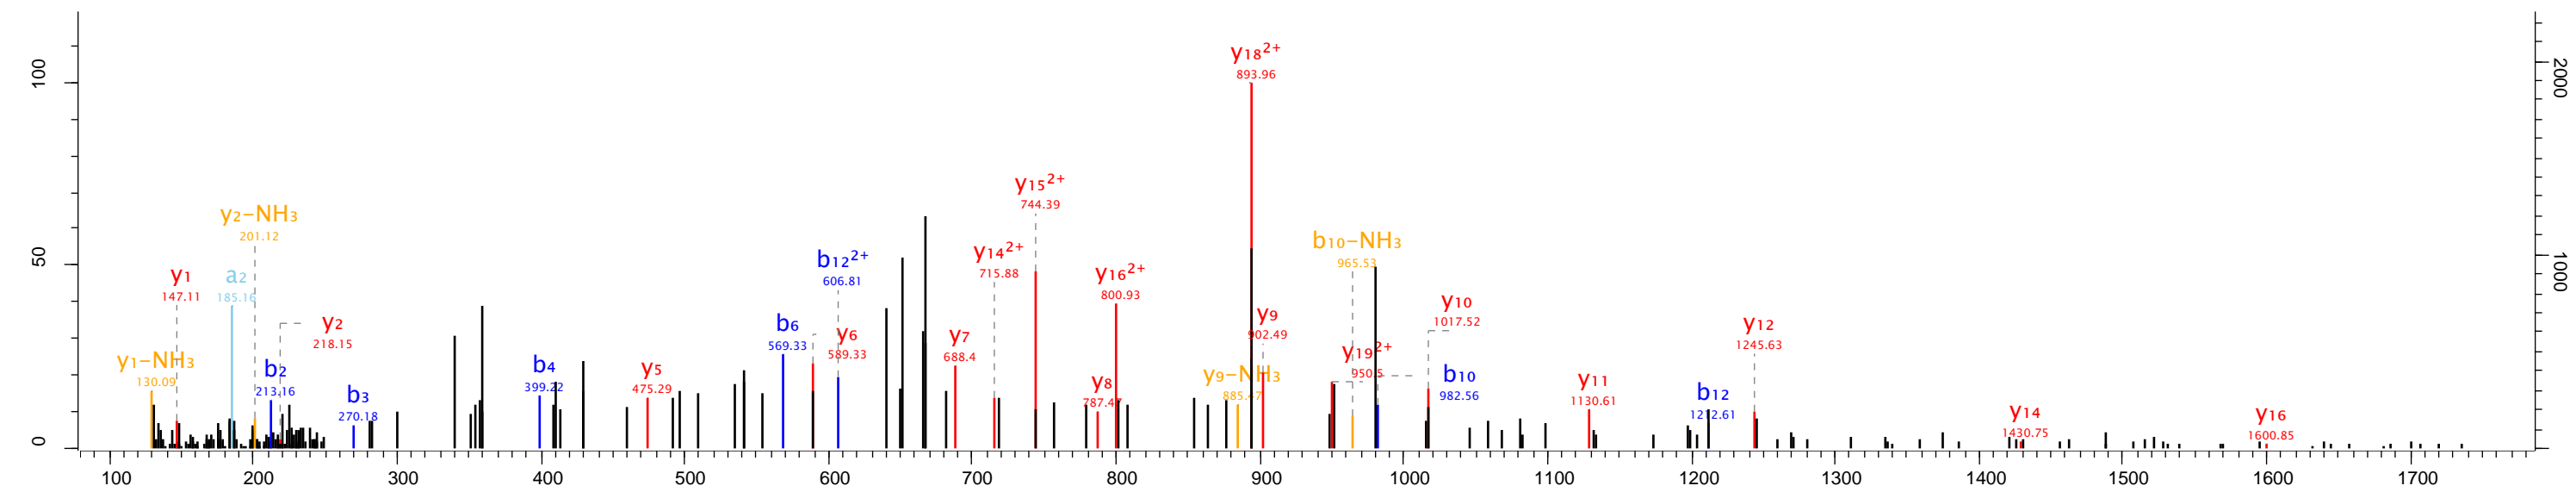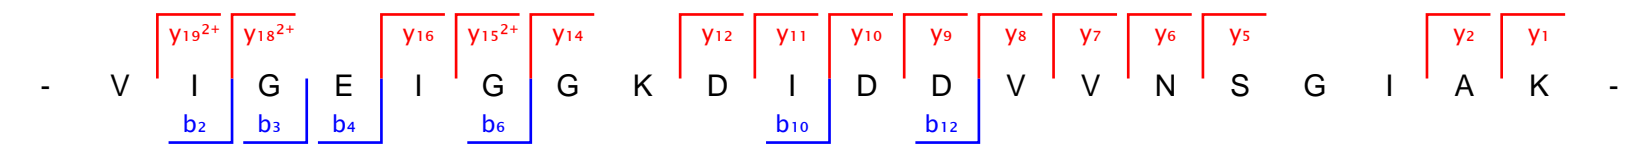

Raw file: 2015-01-05\_CL03\_XenEmb\_x2  
 Scan: 30406  
 Method: ITMS; HCD  
 Score: 80.38  
 m/z: 667.03

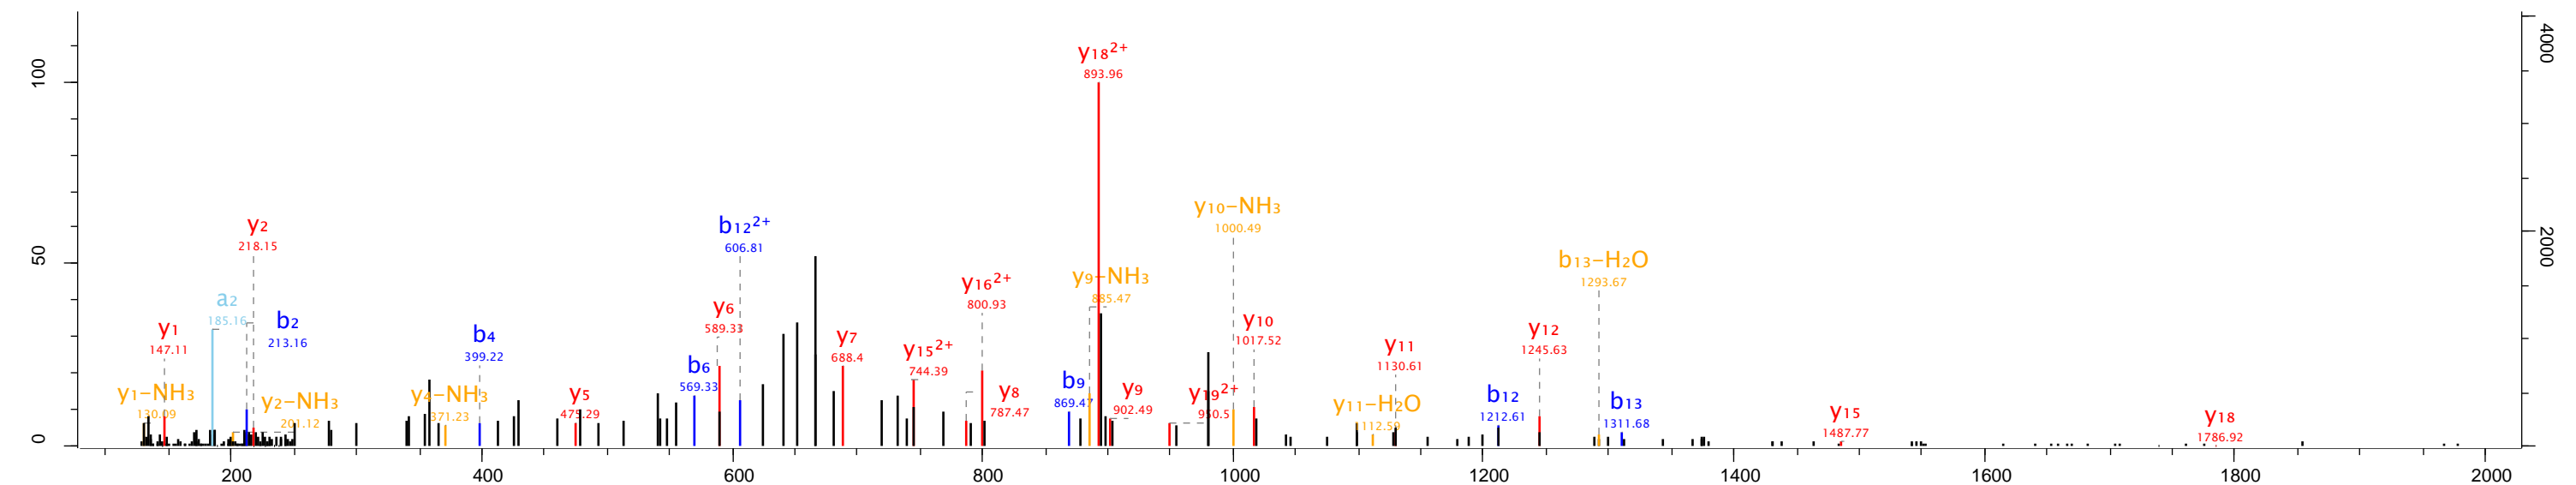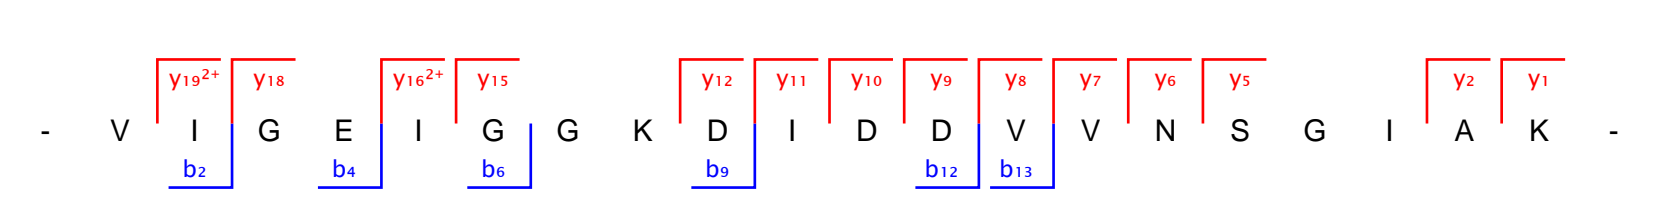

Raw file 2015-01-05\_CL03\_XenEmb\_x2 Scan 30432 Method ITMS; HCD Score 58.86 m/z 708.04

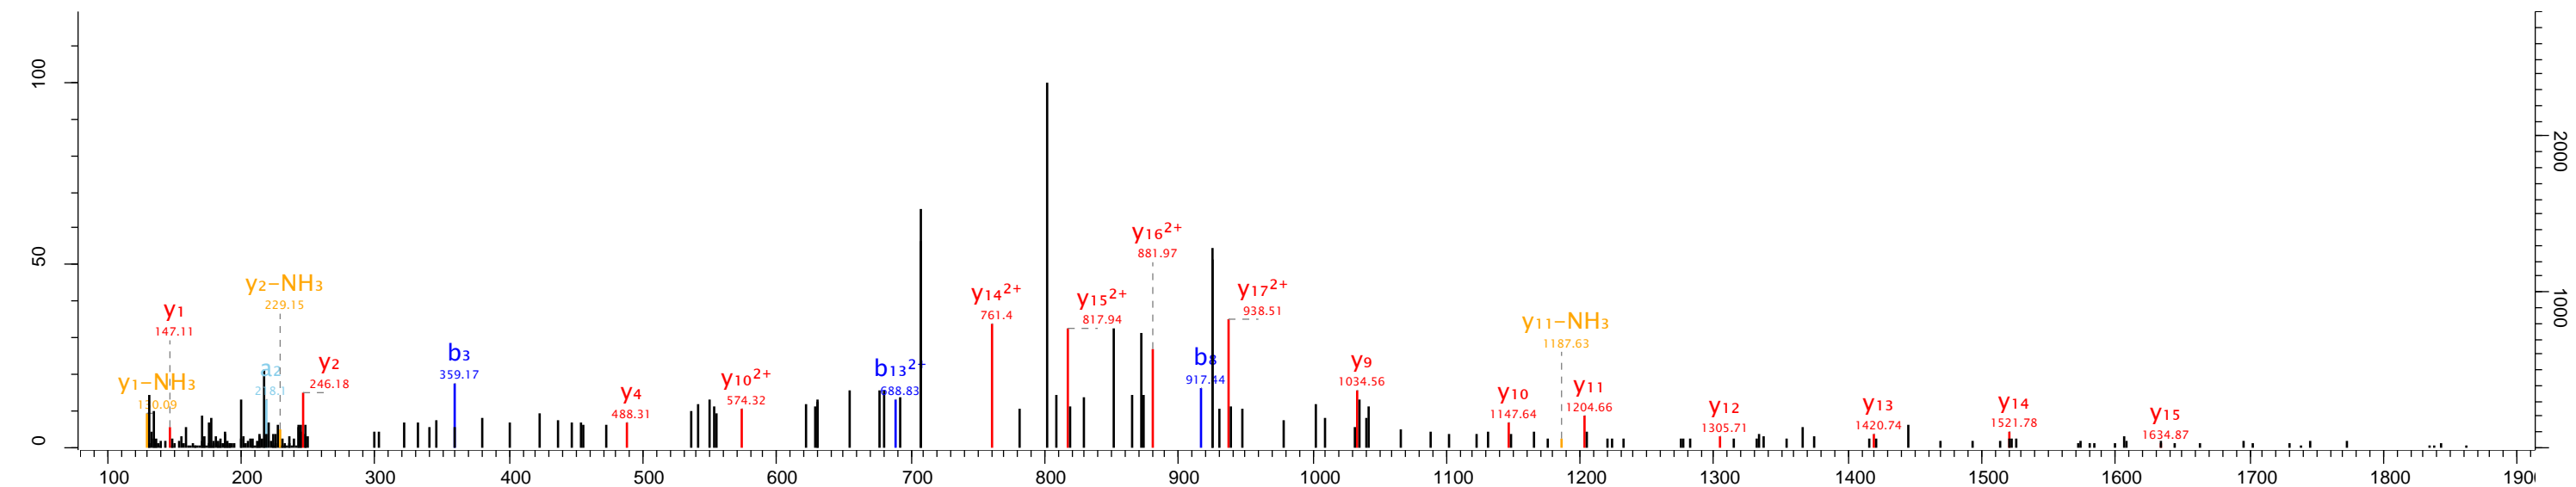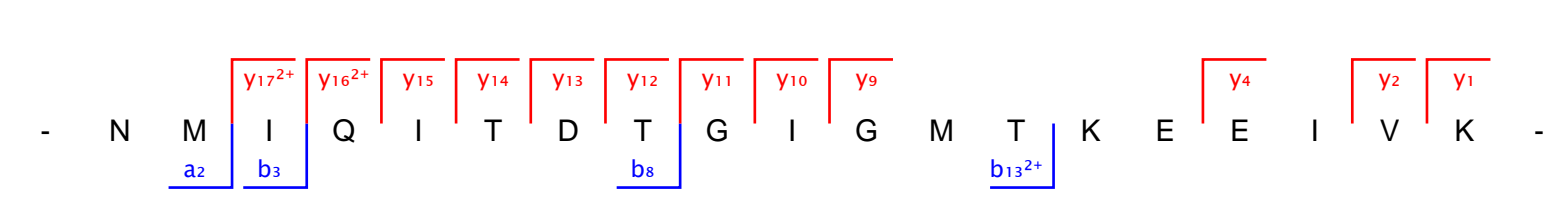

Raw file: 2015-01-05\_CL03\_XenEmb\_x2  
 Scan: 30508  
 Method: ITMS; HCD  
 Score: 108.97  
 m/z: 677.37

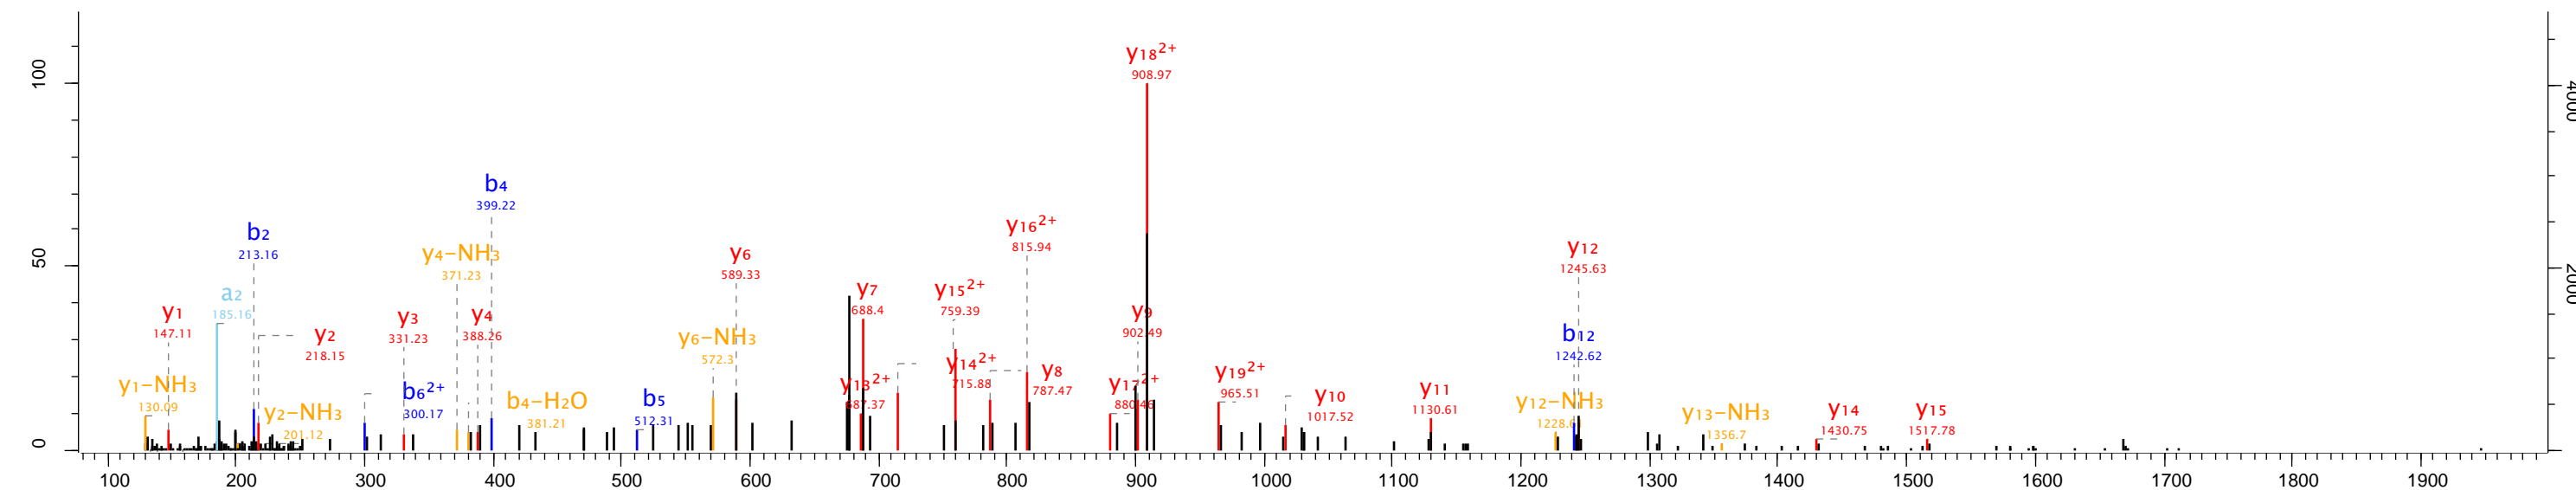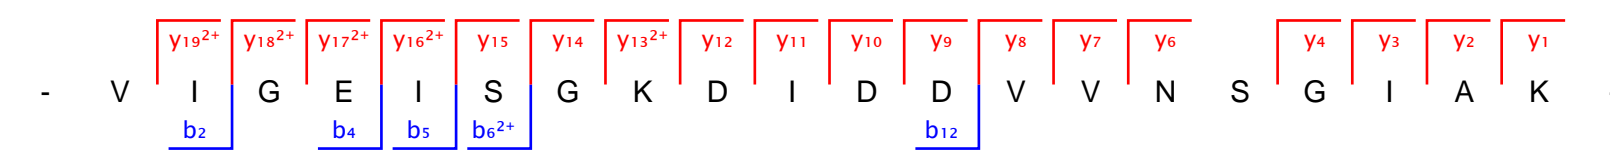

Raw file: 2015-01-05\_CL03\_XenEmb\_x2  
 Scan: 30515  
 Method: ITMS; HCD  
 Score: 75.01  
 m/z: 756.65

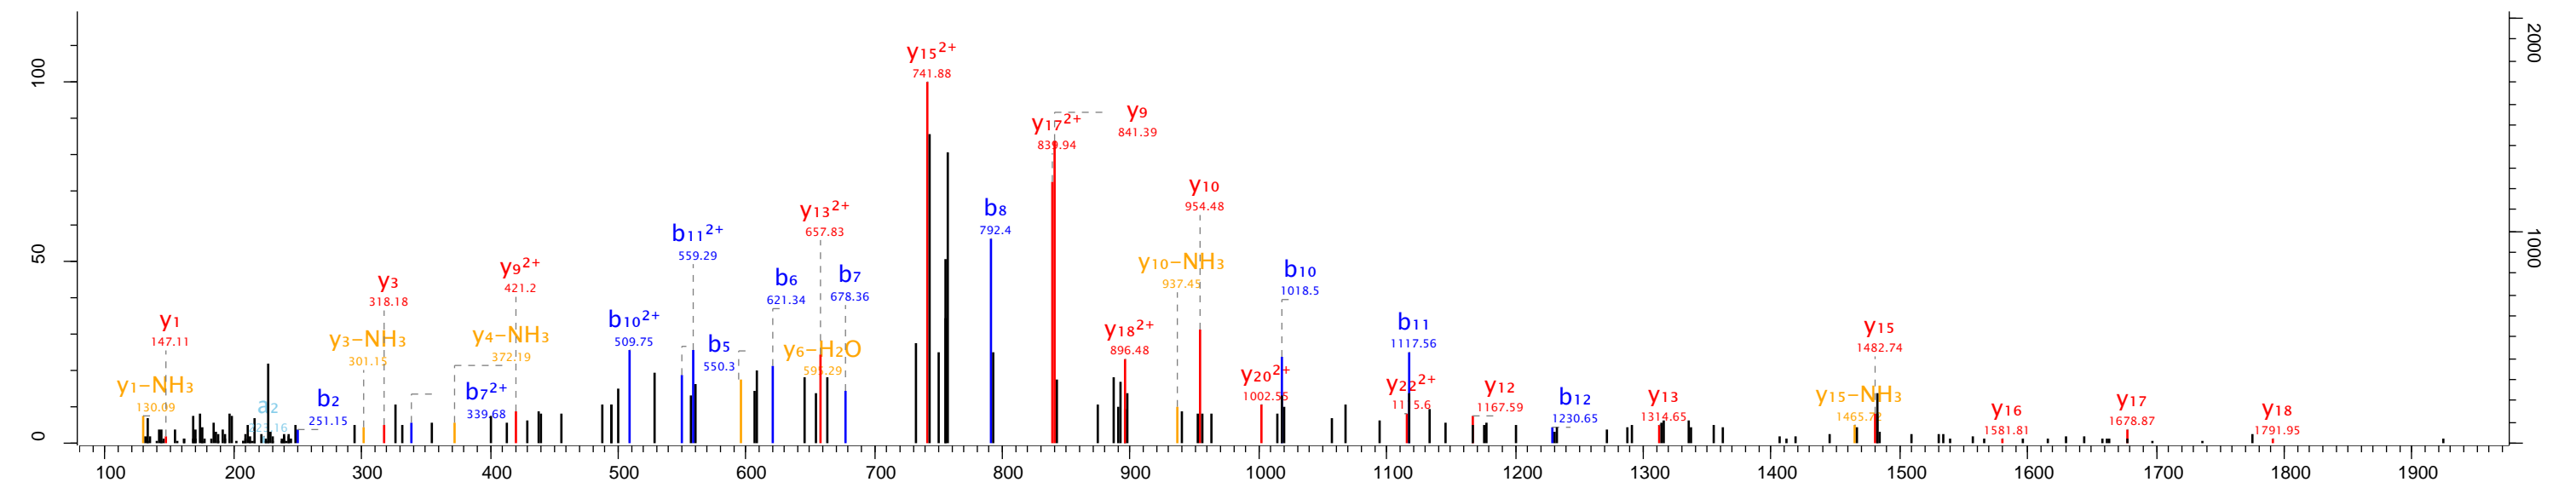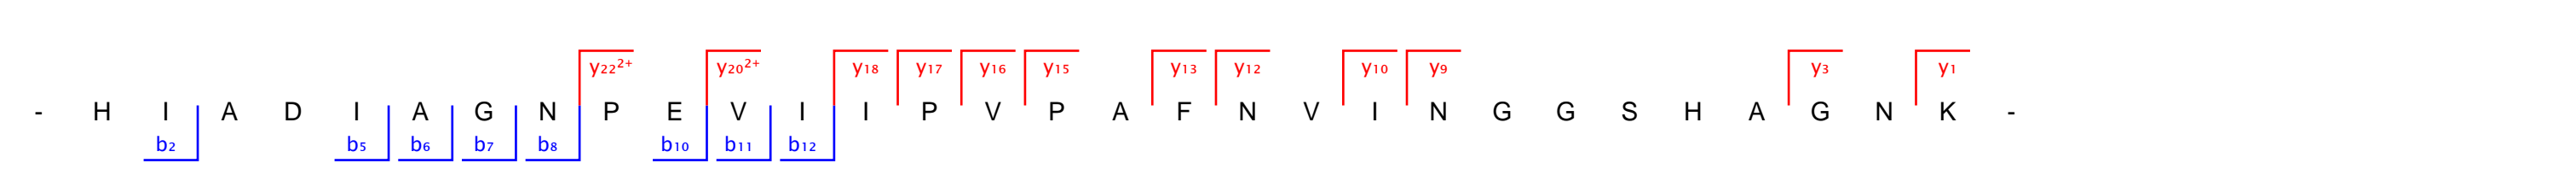

Raw file 2015-01-05\_CL03\_XenEmb\_x2 Scan 30689 Method ITMS; HCD Score 128.03 m/z 513.31

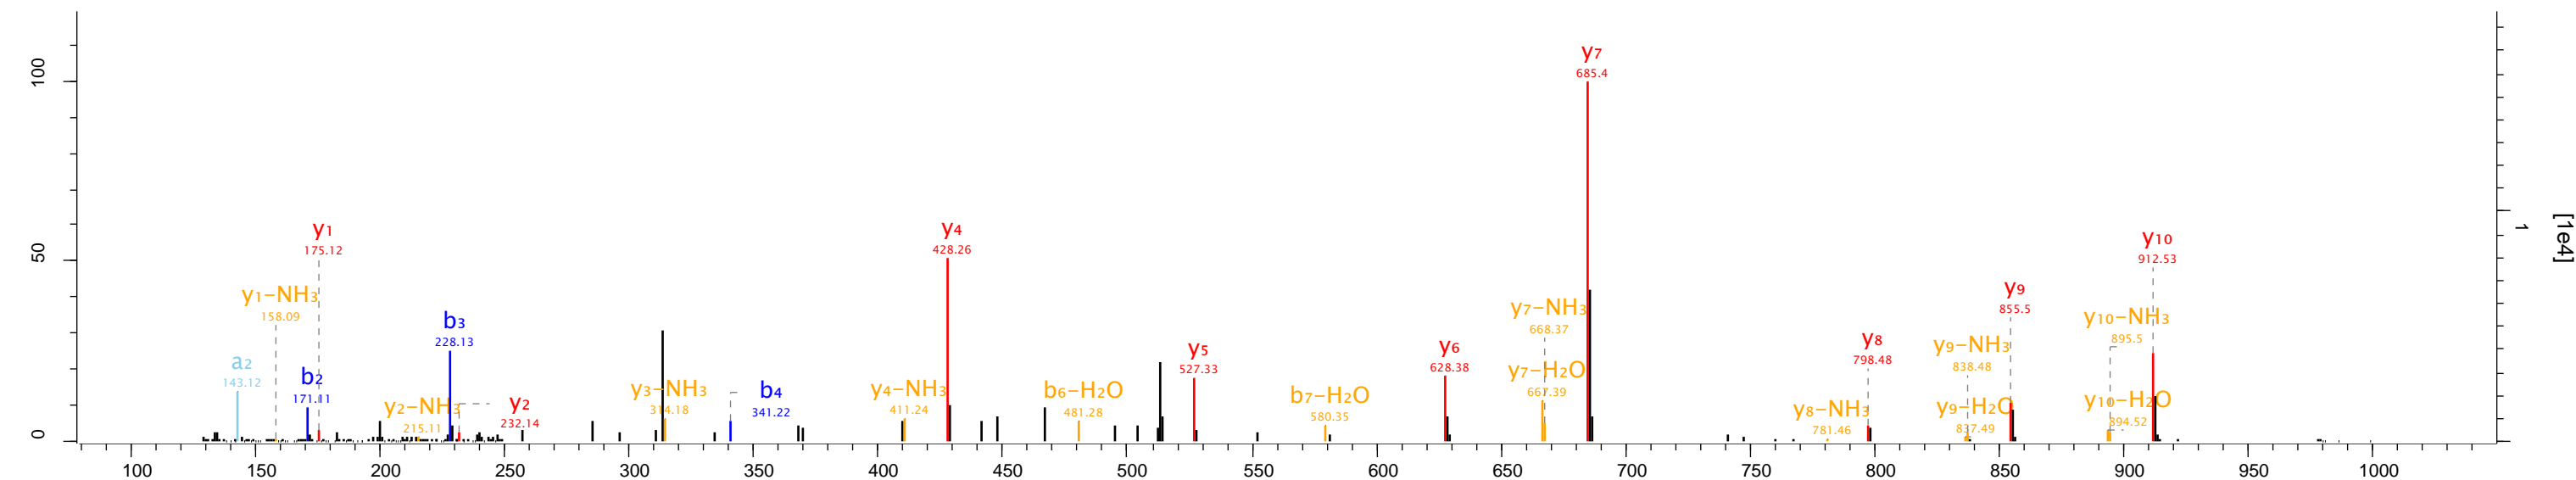



Raw file 2015-01-05\_CL03\_XenEmb\_x2 Scan 30705 Method ITMS; HCD Score 125.68 m/z 513.31

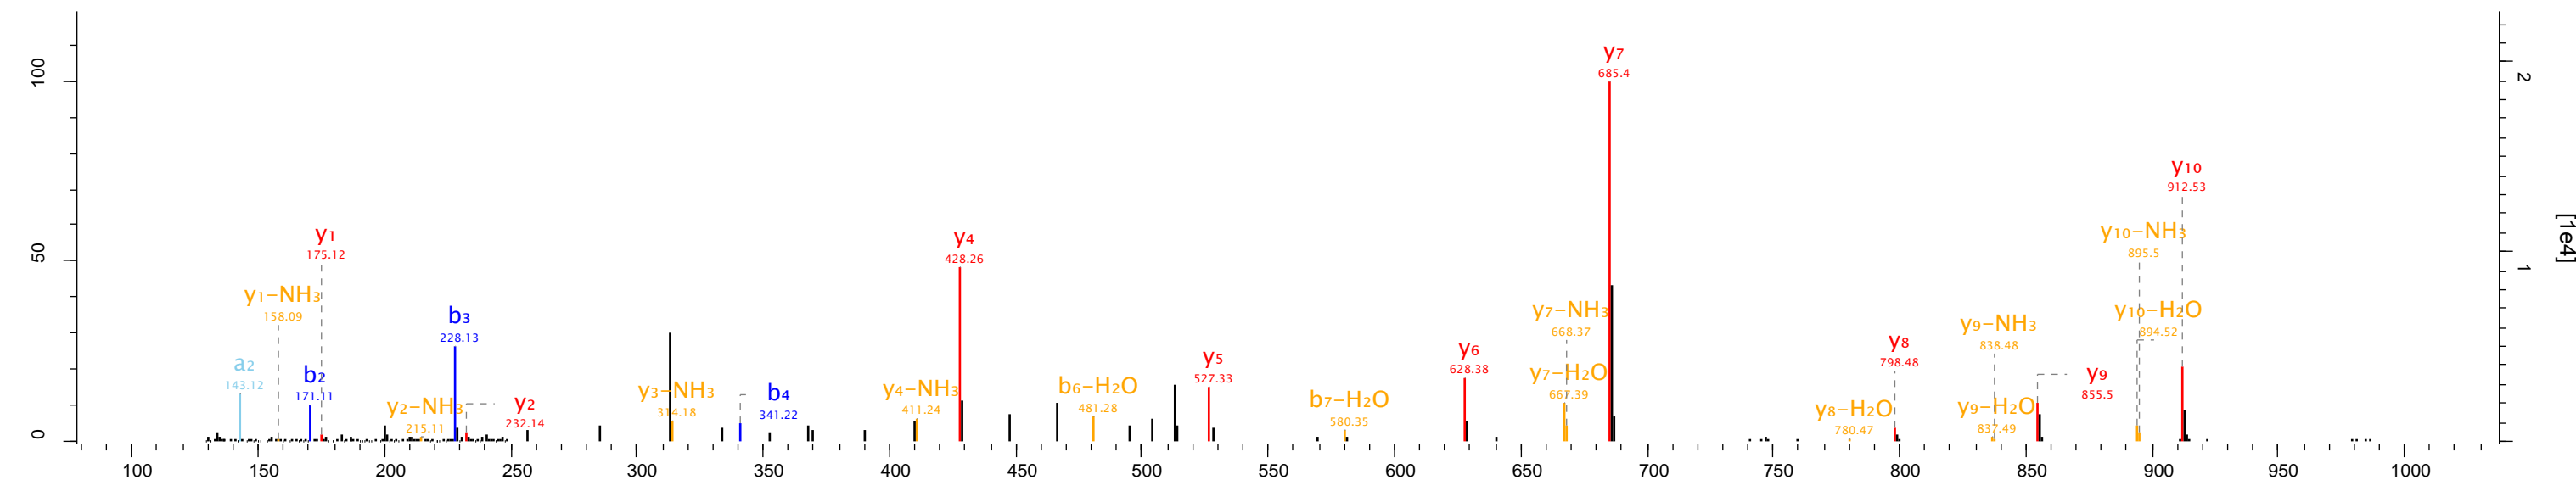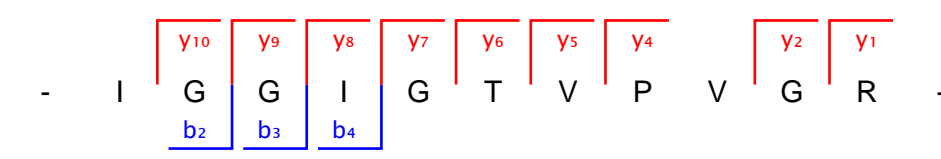

Raw file: 2015-01-05\_CL03\_XenEmb\_x2  
 Scan: 30766 Method: ITMS; HCD Score: 114.99 m/z: 712.4

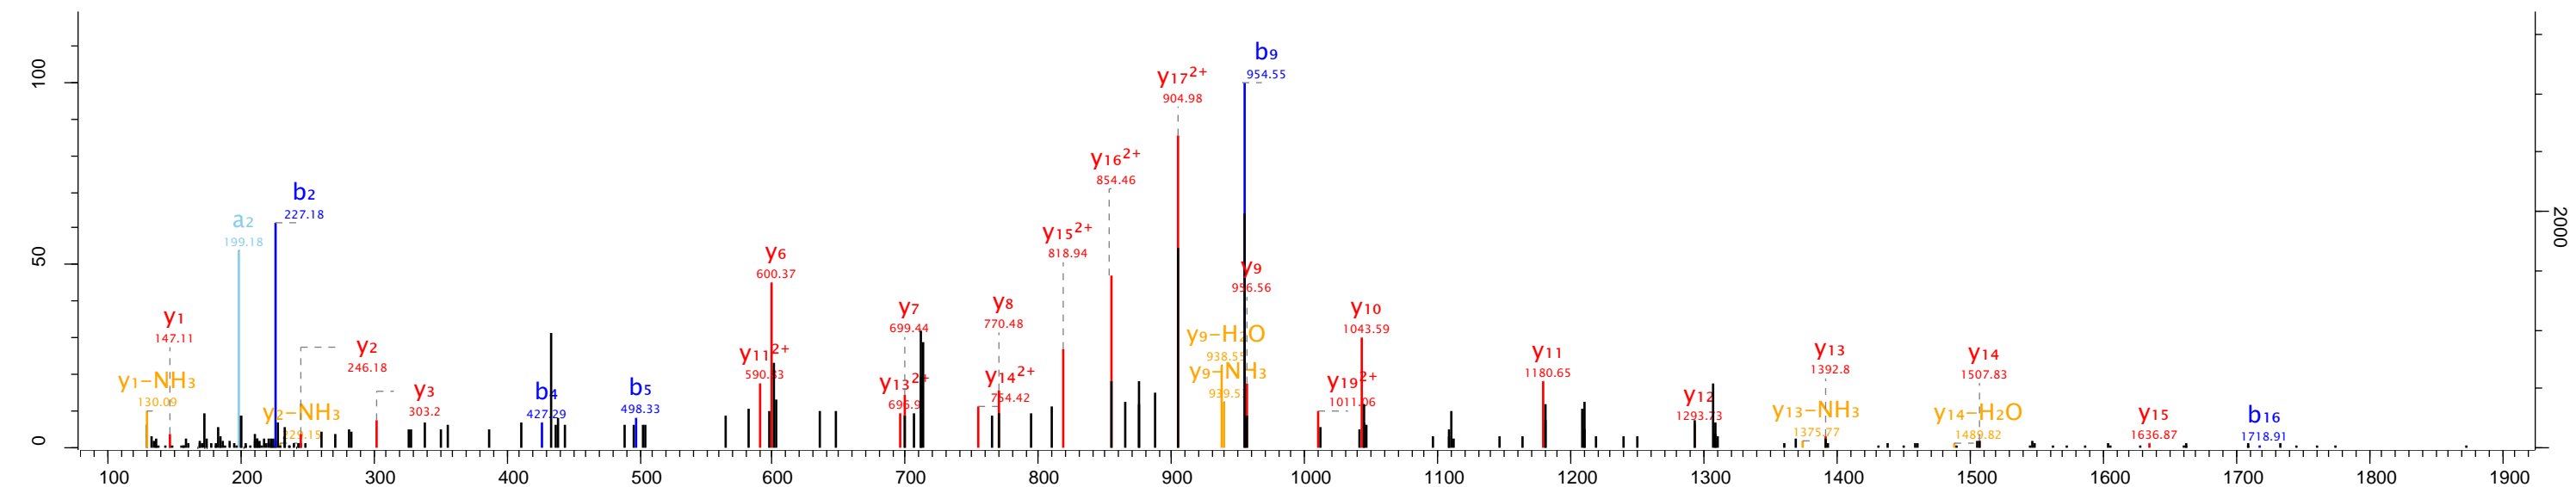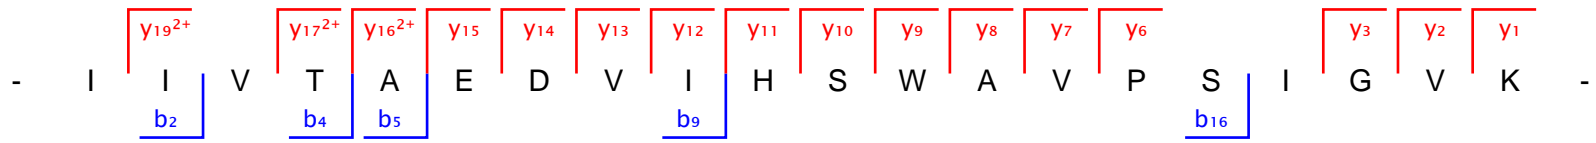

Spectral Annotation for Single-Peptide IDs in 16-cell Embryo using Q-OT-LIT

Raw file 2015-01-05\_CL03\_XenEmb\_x2 Scan 30813 Method ITMS; HCD Score 87.32 m/z 740.71

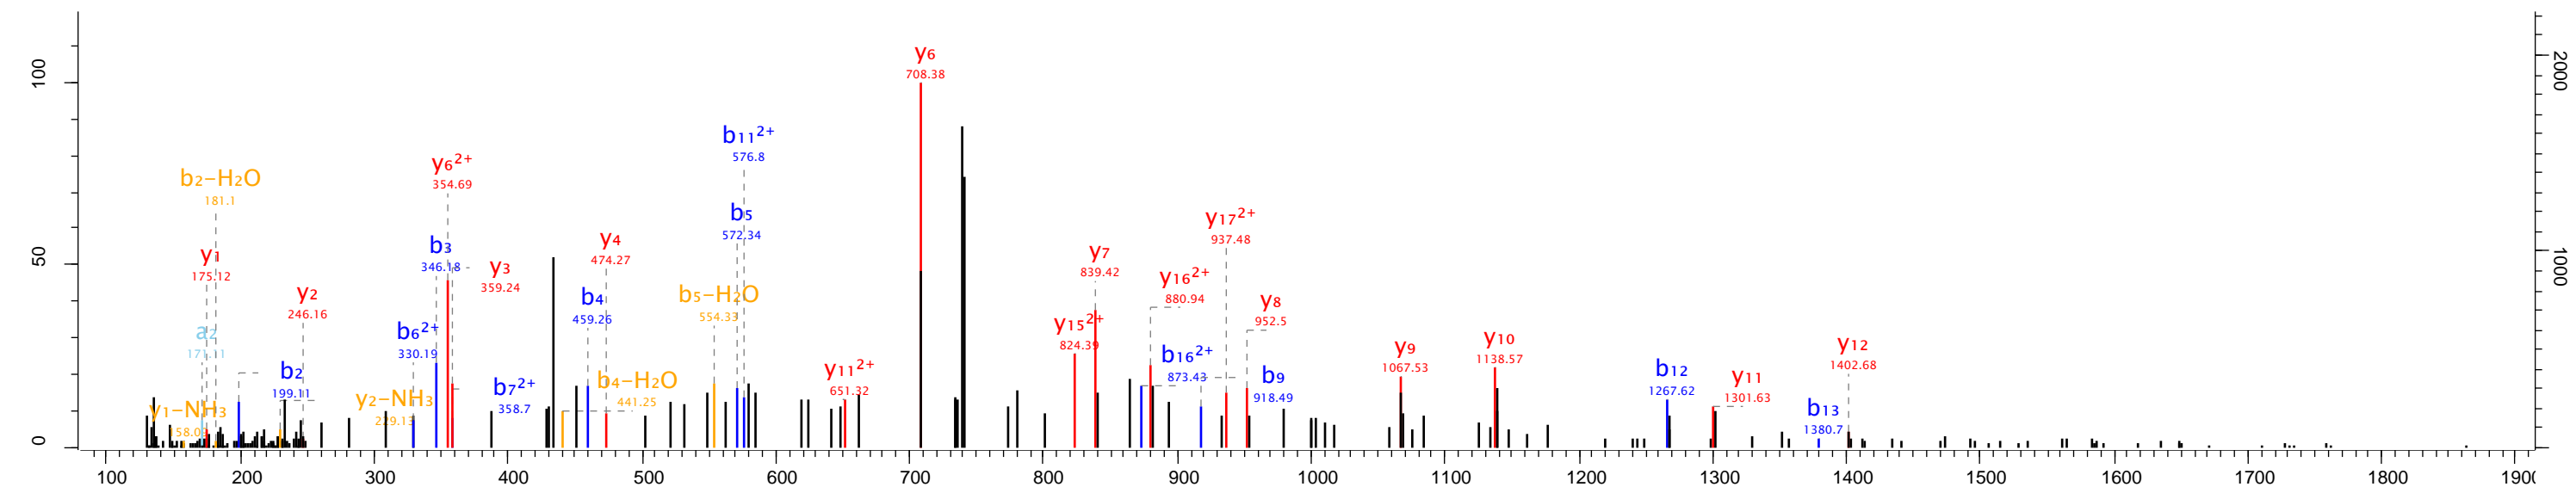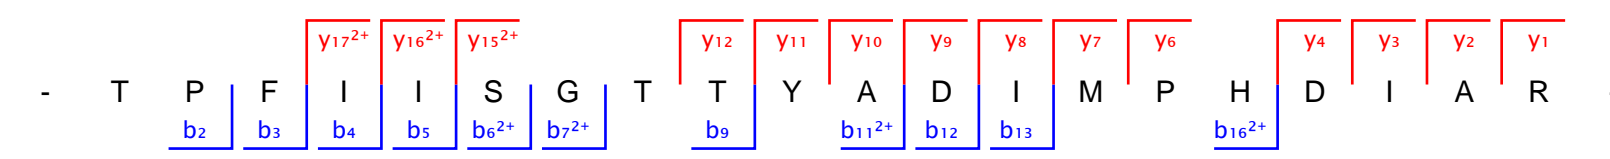

Spectral Annotation for Single-Peptide IDs in 16-cell Embryo using Q-OT-LIT

Raw file 2015-01-05\_CL03\_XenEmb\_x2 Scan 30820 Method ITMS; HCD Score 83.5 m/z 536.29

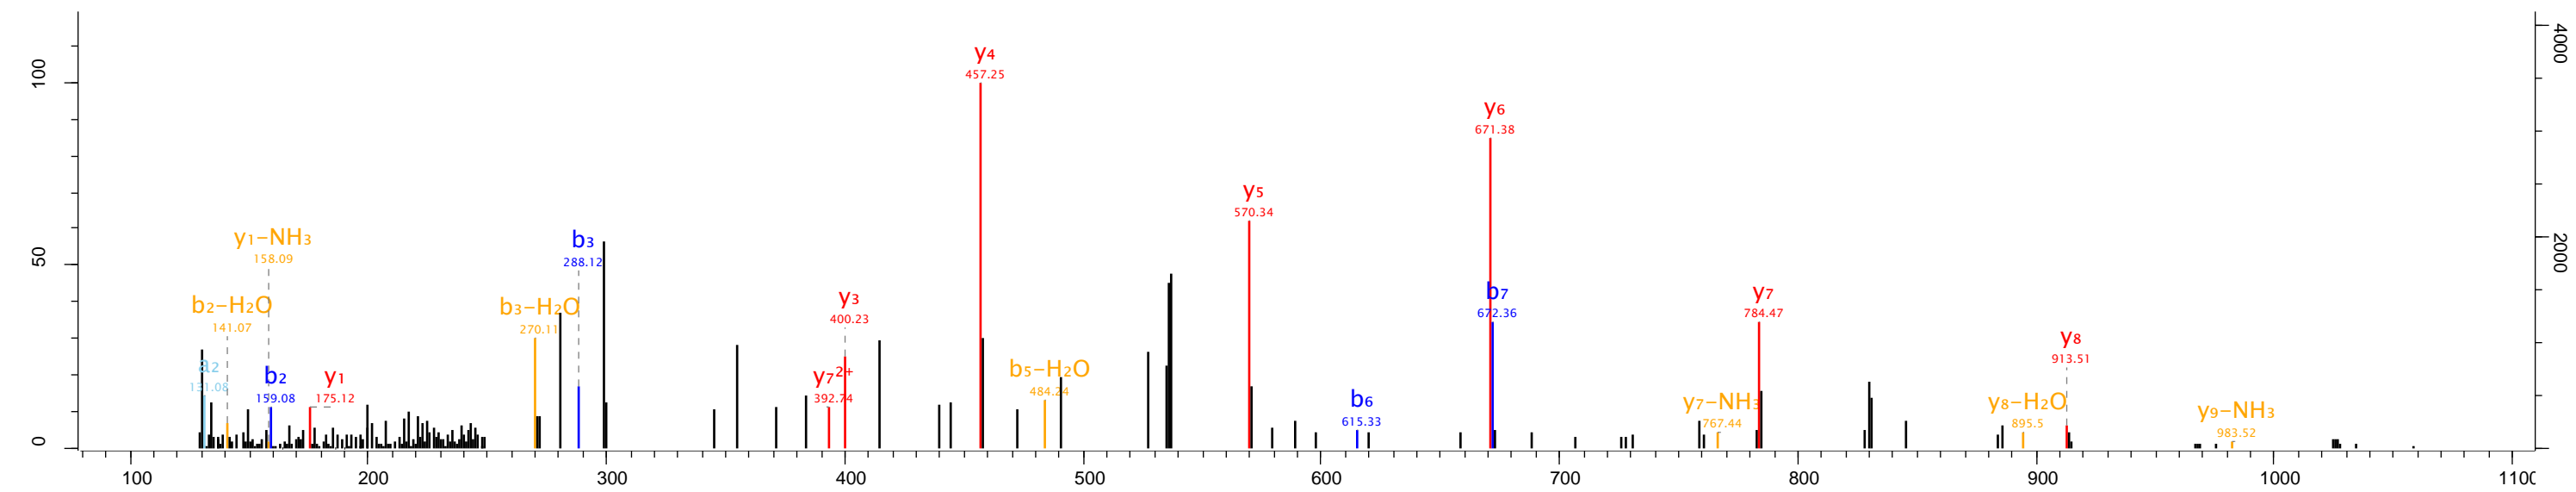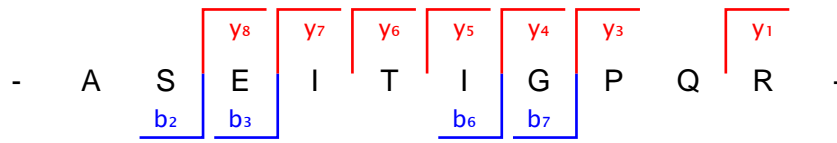

Raw file: 2015-01-05\_CL03\_XenEmb\_x2  
 Scan: 30840 Method: ITMS; HCD Score: 49.56 m/z: 740.37

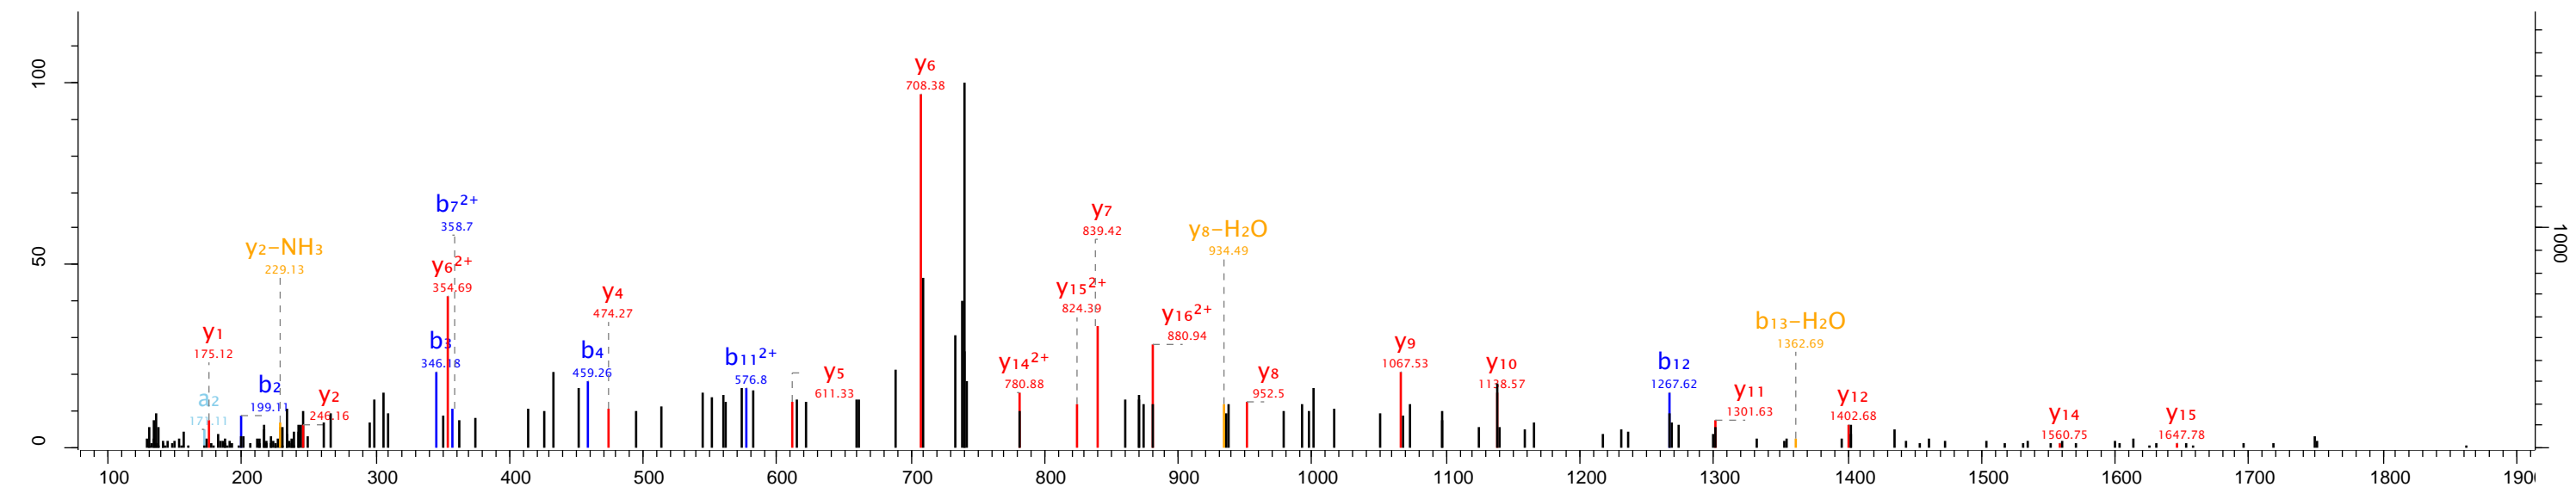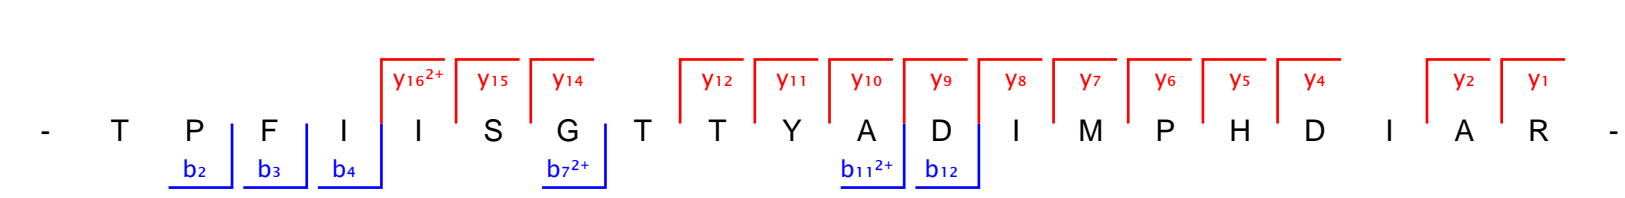

Raw file: 2015-01-05\_CL03\_XenEmb\_x2  
 Scan: 30944  
 Method: ITMS; HCD  
 Score: 52.09  
 m/z: 759.71

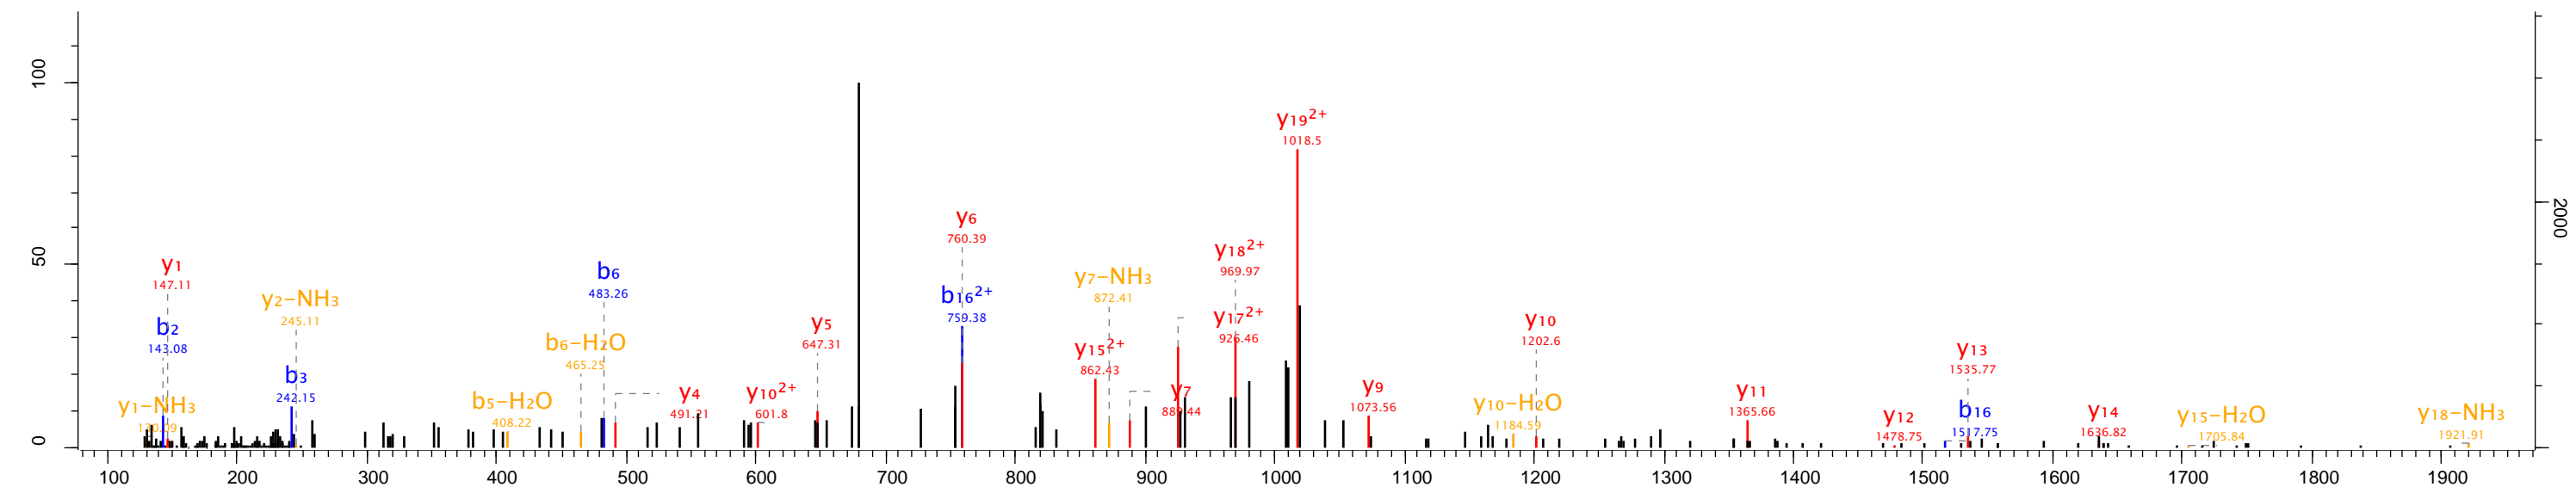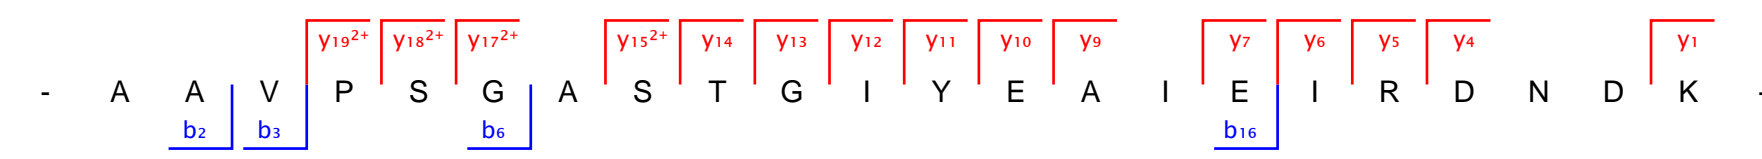

Spectral Annotation for Single-Peptide IDs in 16-cell Embryo using Q-OT-LIT

Raw file: 2015-01-05\_CL03\_XenEmb\_x2  
 Scan: 30967 Method: ITMS; HCD Score: 75.53 m/z: 760.39

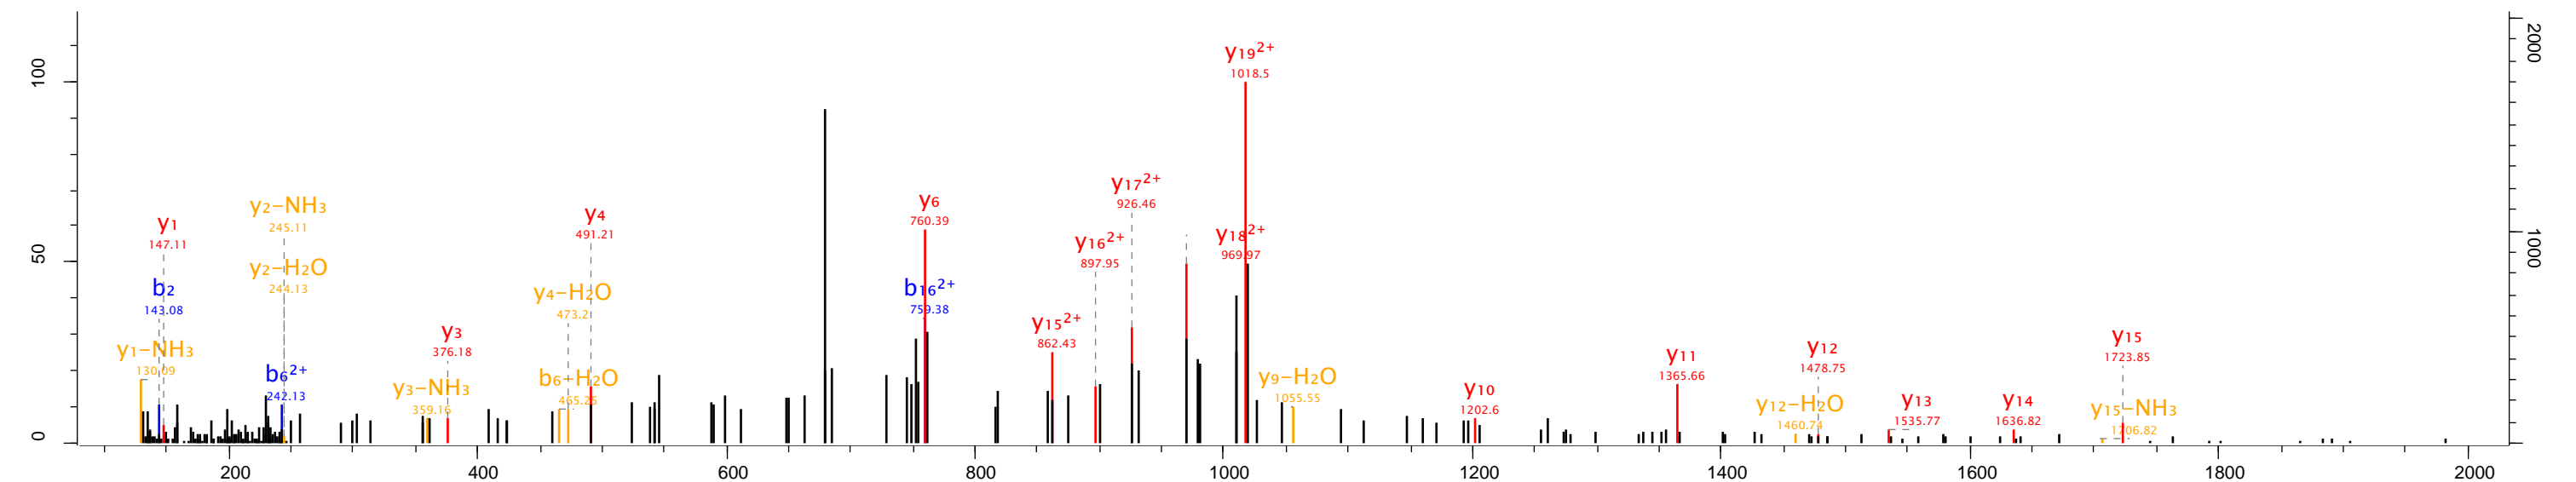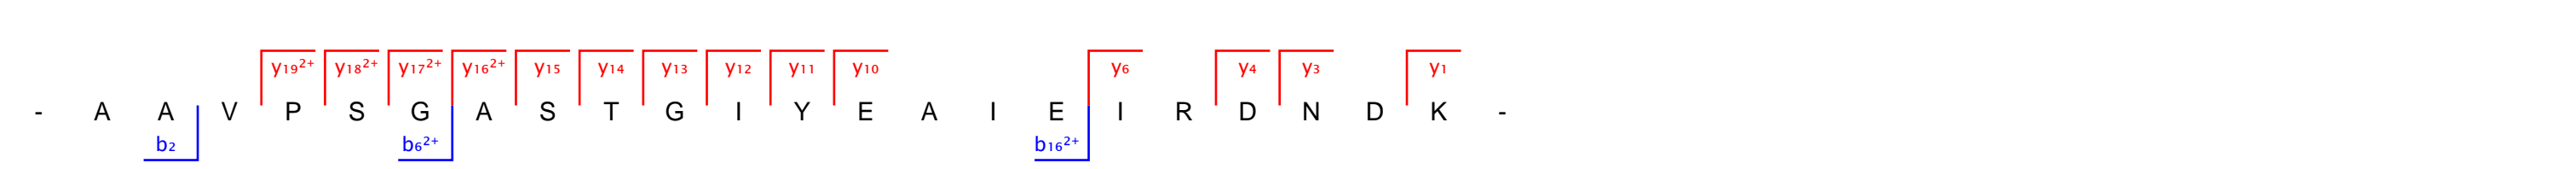

Raw file 2015-01-05\_CL03\_XenEmb\_x2 Scan 30999 Method ITMS; HCD Score 79.59 m/z 795.41

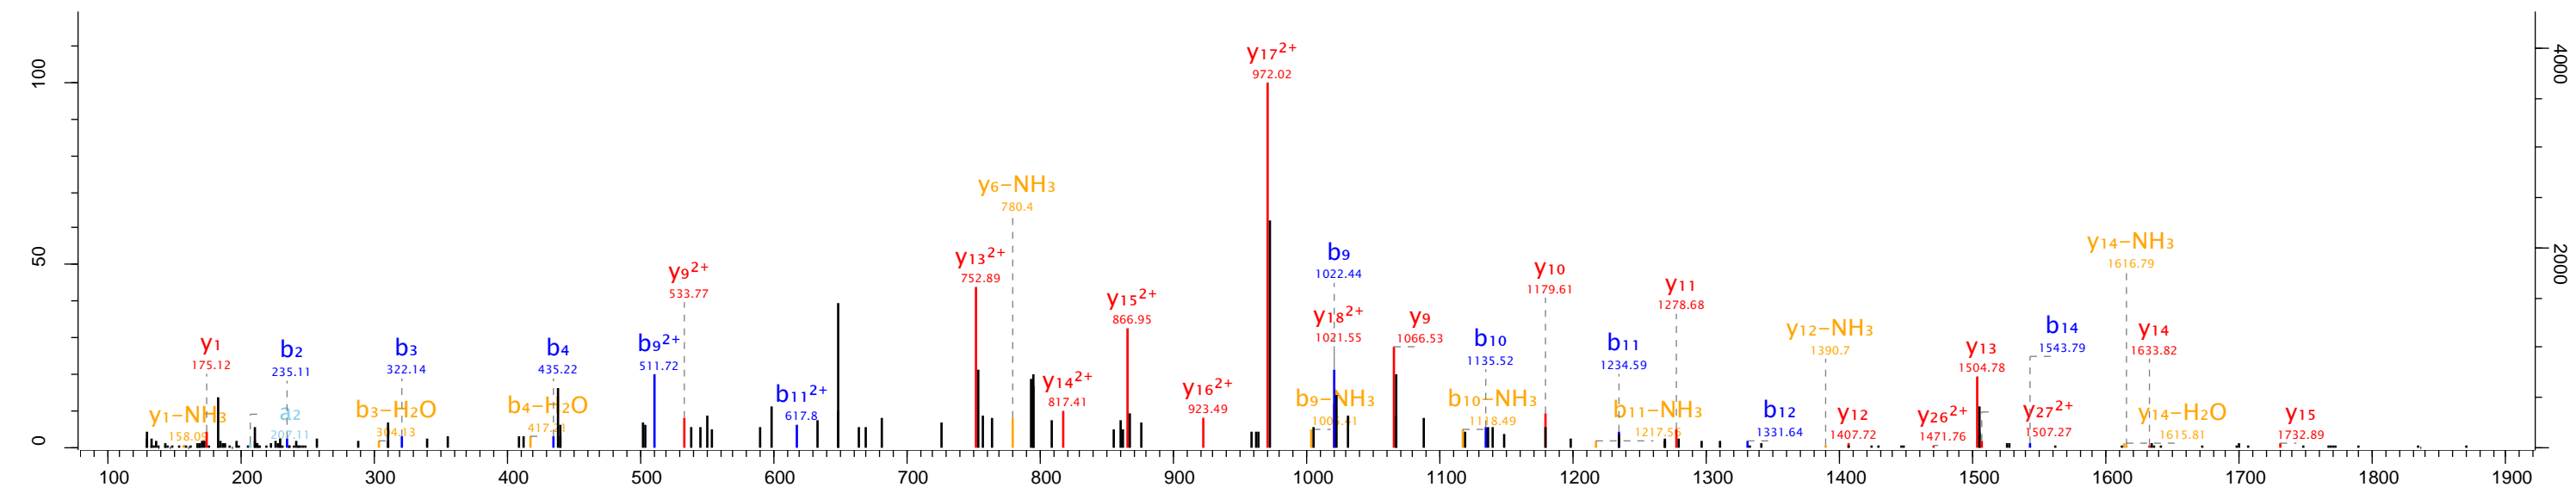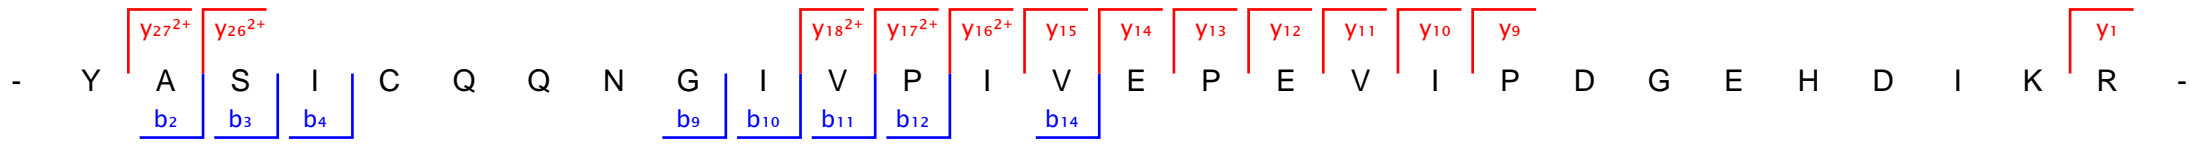

Spectral Annotation for Single-Peptide IDs in 16-cell Embryo using Q-OT-LIT



Raw file 2015-01-05\_CL03\_XenEmb\_x2 Scan 31069 Method ITMS; HCD Score 45.84 m/z 719.69

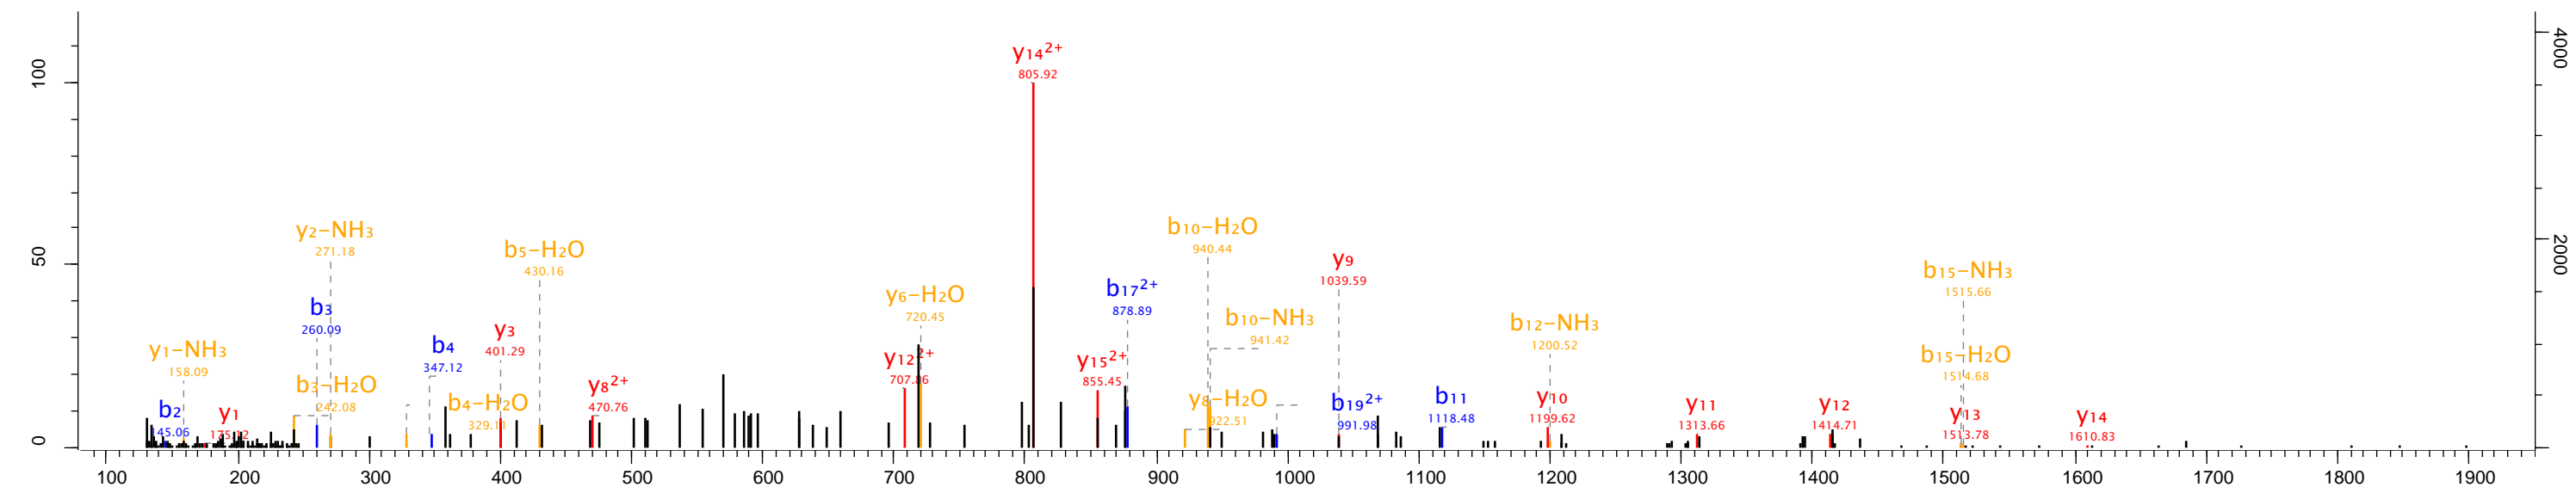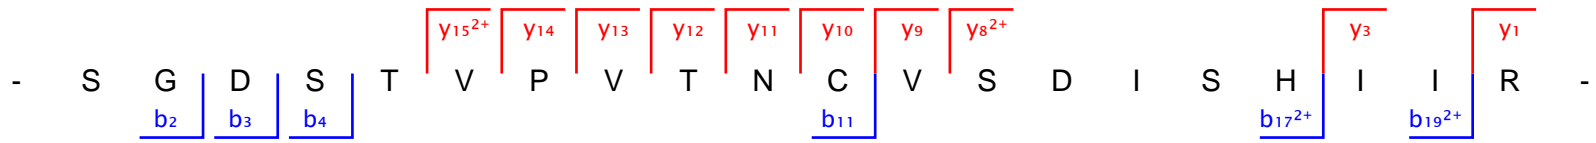

Spectral Annotation for Single-Peptide IDs in 16-cell Embryo using Q-OT-LIT

Raw file 2015-01-05\_CL03\_XenEmb\_x2 Scan 31098 Method ITMS; HCD Score 44.79 m/z 719.69

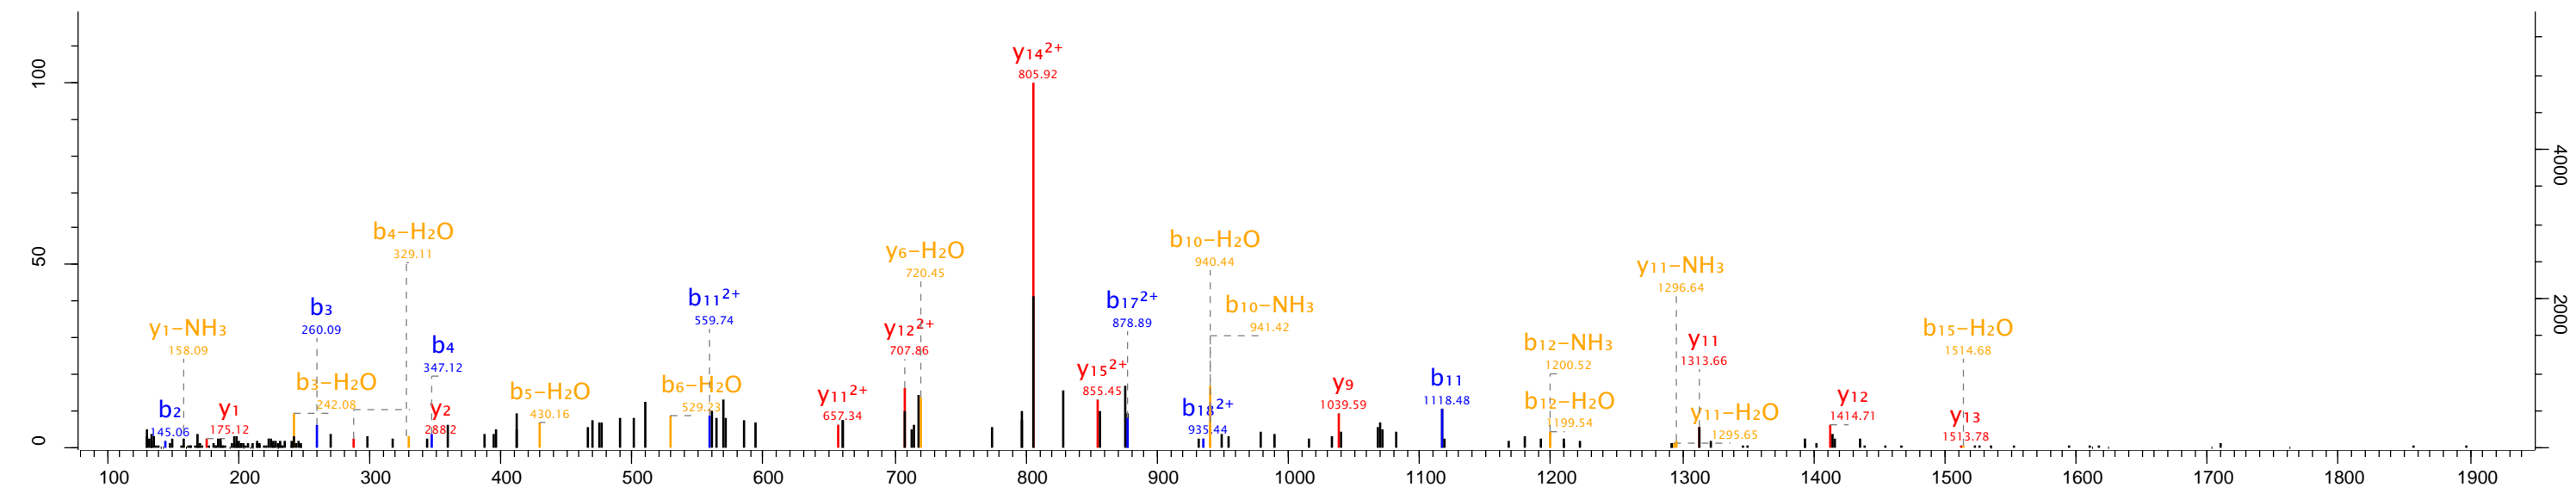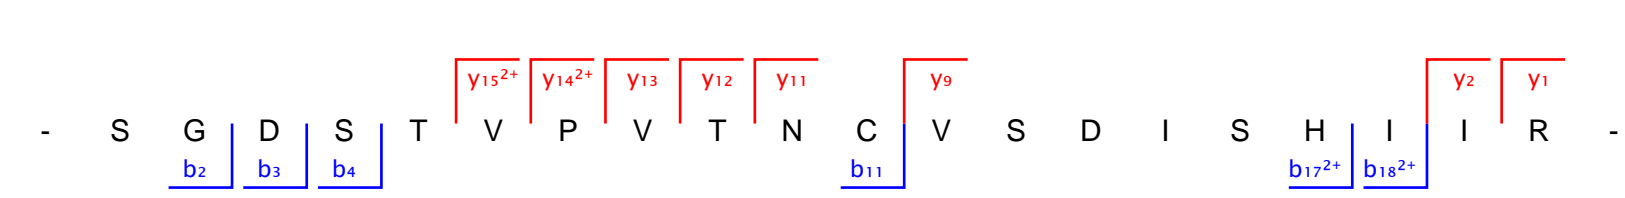

Spectral Annotation for Single-Peptide IDs in 16-cell Embryo using Q-OT-LIT

Raw file: 2015-01-05\_CL03\_XenEmb\_x2  
 Scan: 31233  
 Method: ITMS; HCD  
 Score: 43.7  
 m/z: 720.03

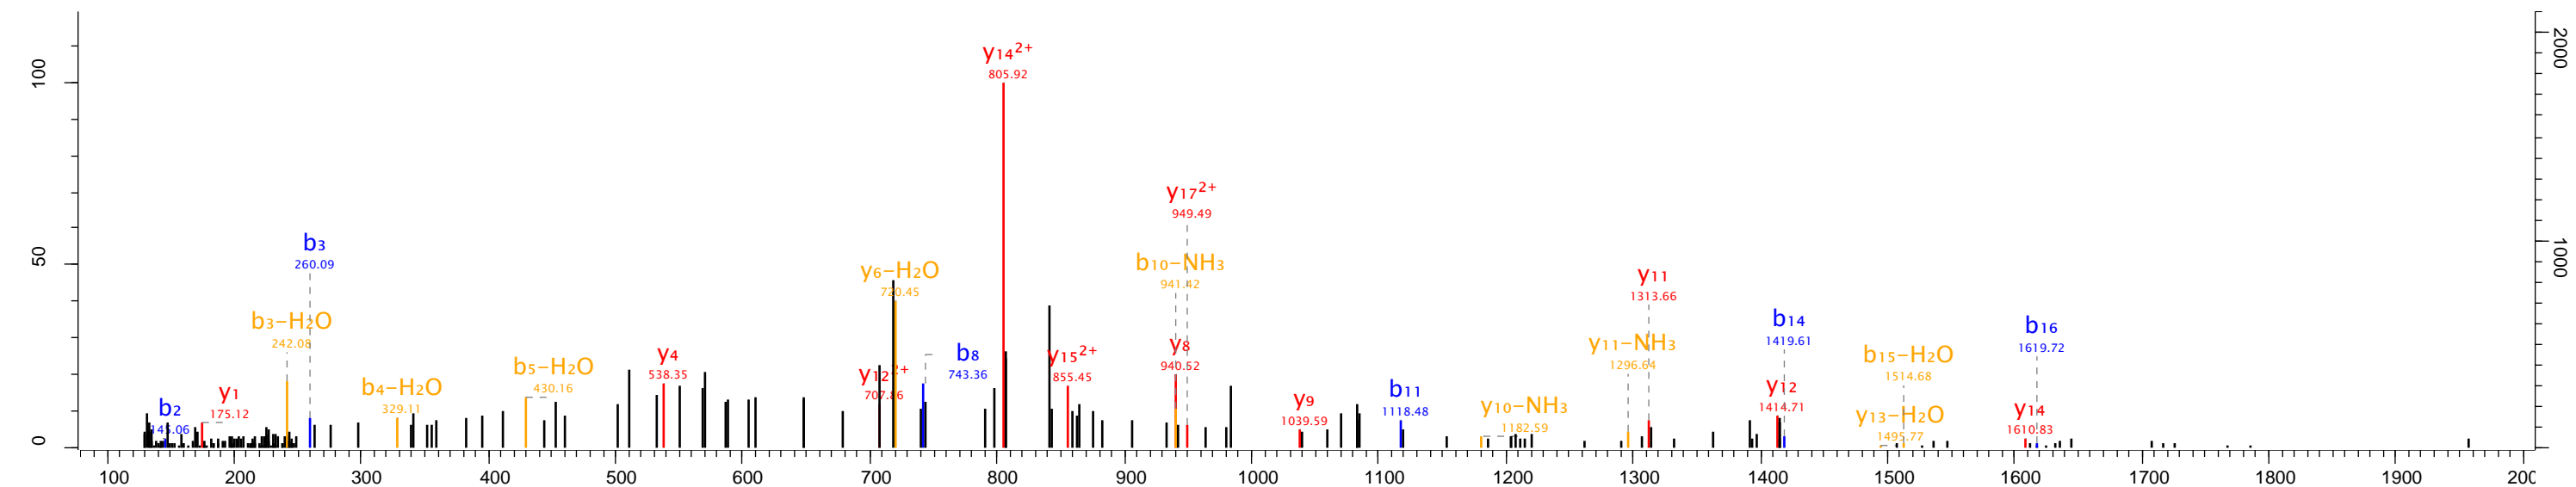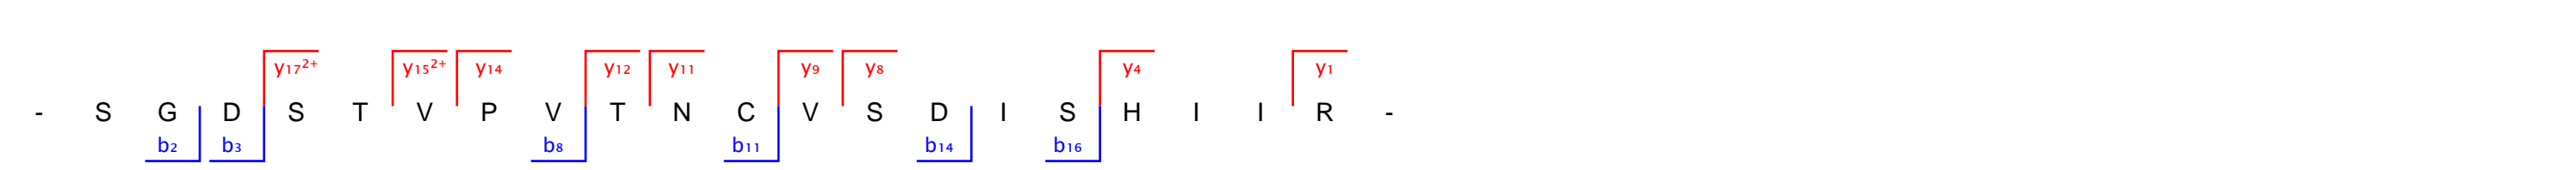

Raw file: 2015-01-05\_CL03\_XenEmb\_x2  
 Scan: 31274 Method: ITMS; HCD Score: 87.79 m/z: 594.33

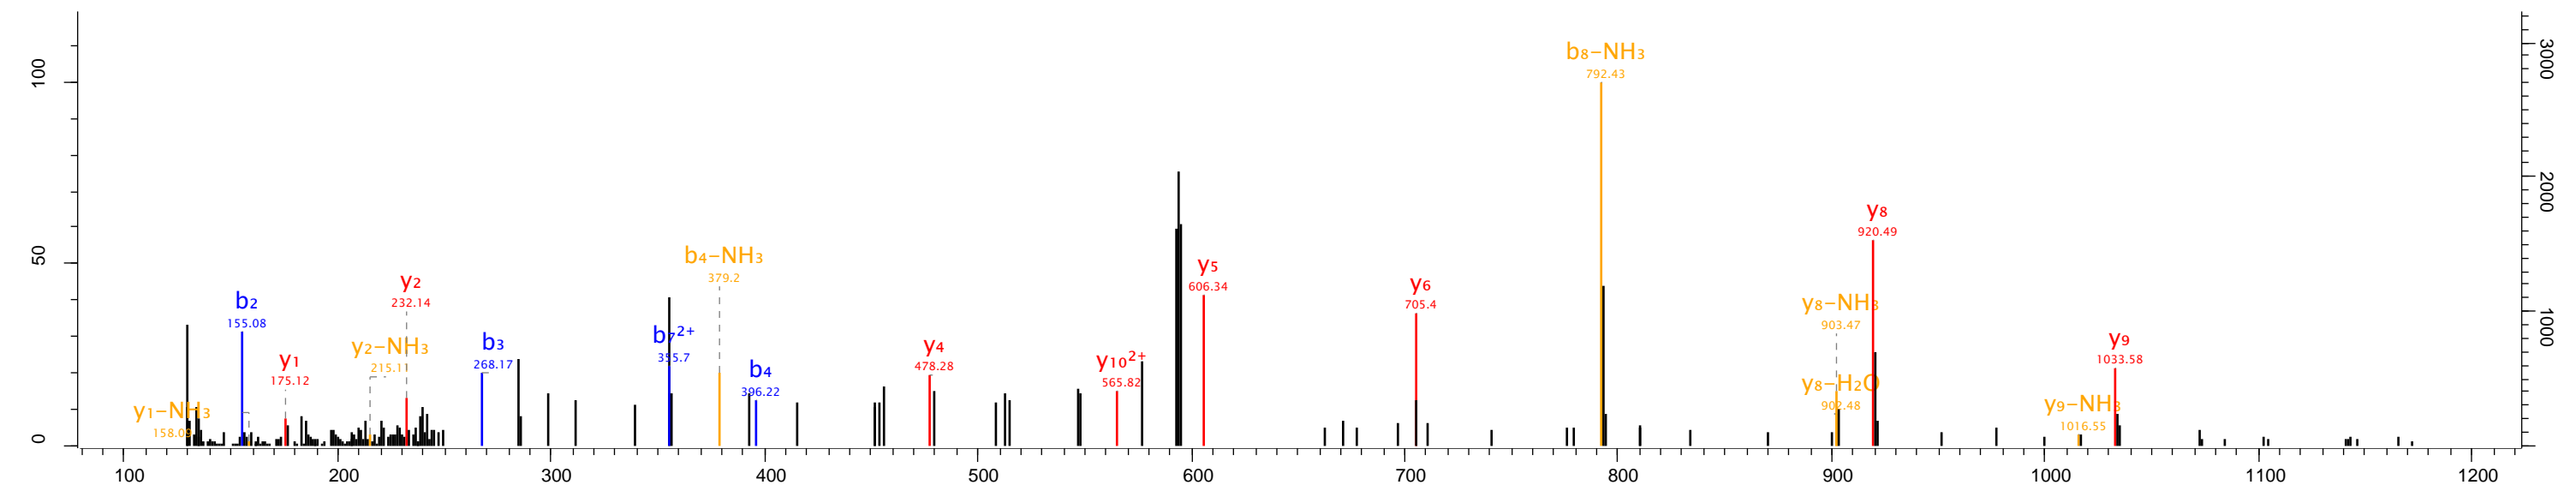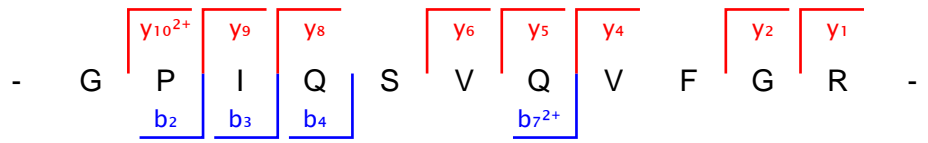

Raw file 2015-01-05\_CL03\_XenEmb\_x2 Scan 31295 Method ITMS; HCD Score 98.04 m/z 594.33

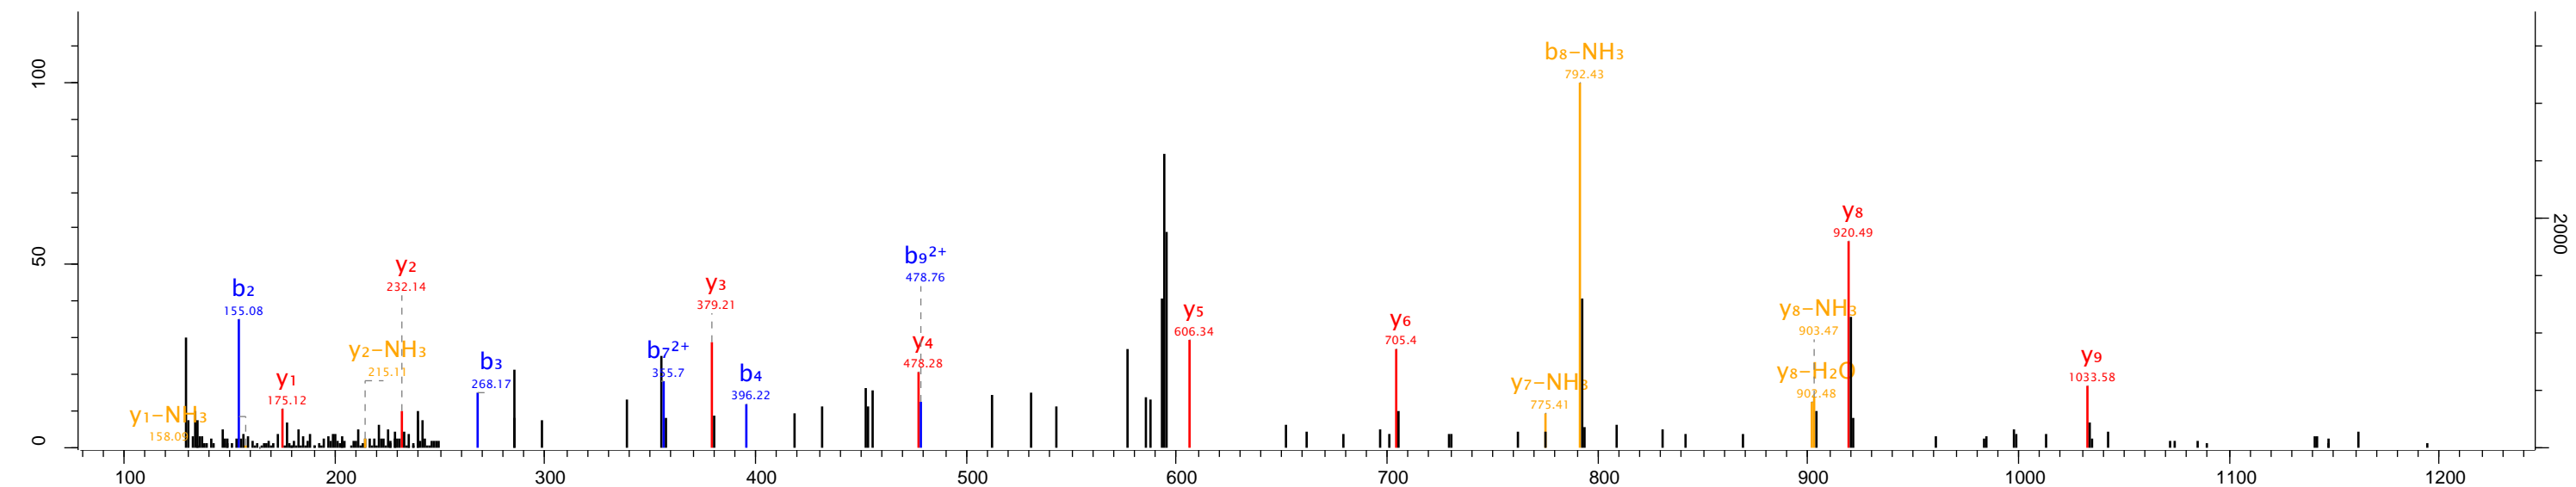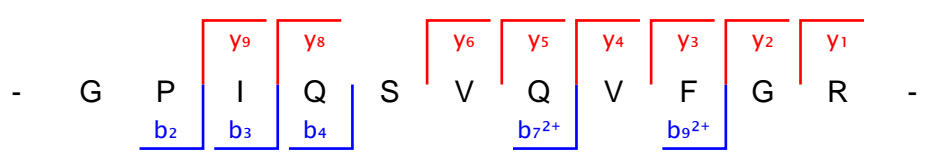

Raw file: 2015-01-05\_CL03\_XenEmb\_x2  
 Scan: 31318 Method: ITMS; HCD Score: 94.36 m/z: 594.33

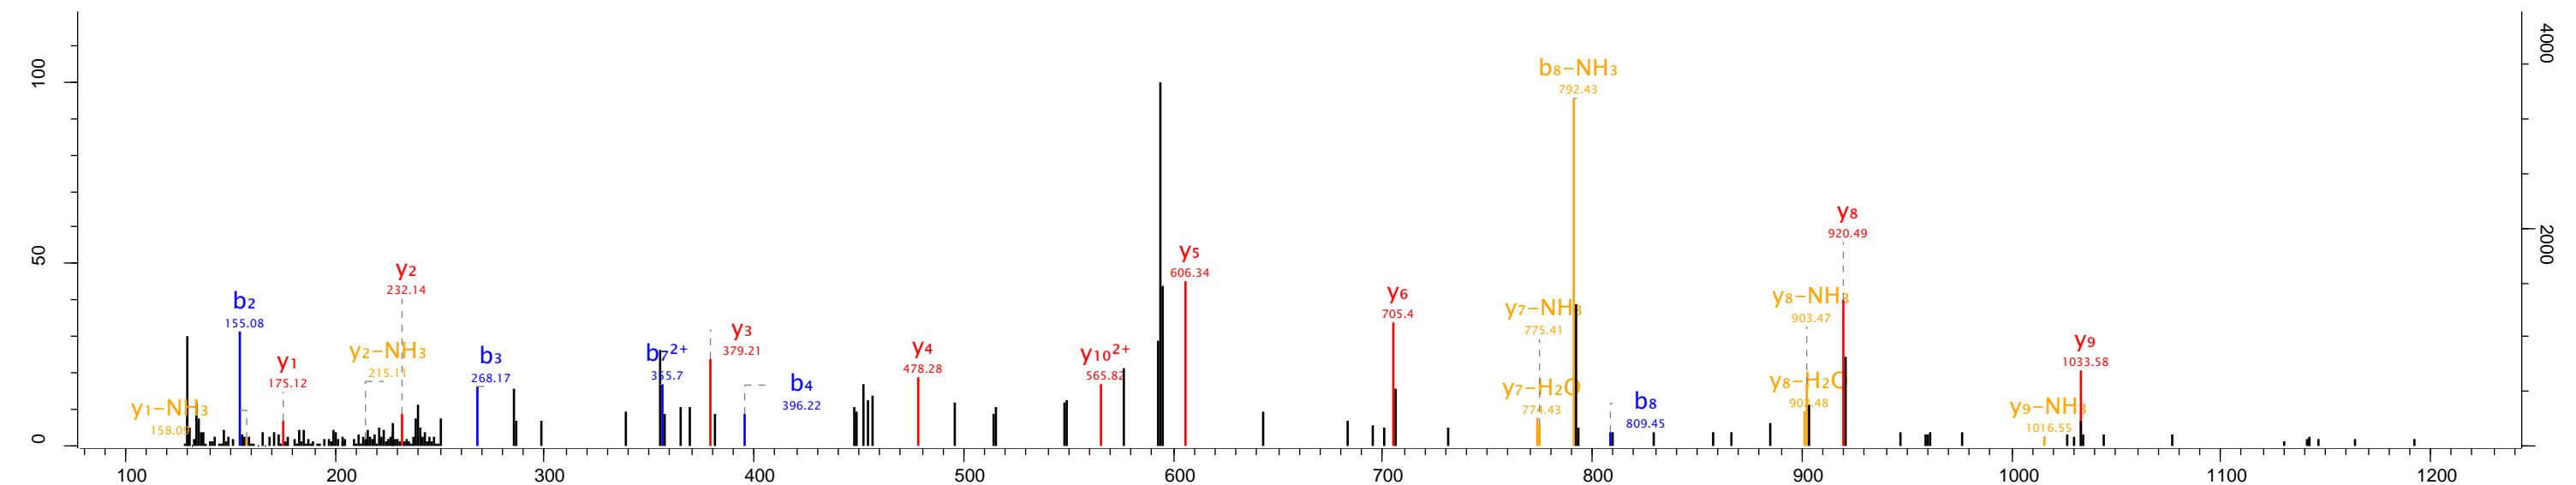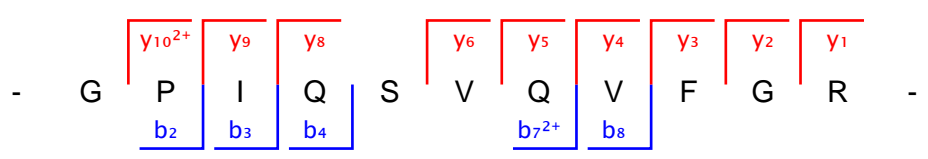

Raw file: 2015-01-05\_CL03\_XenEmb\_x2  
 Scan: 31358  
 Method: ITMS; HCD  
 Score: 89.9  
 m/z: 594.33

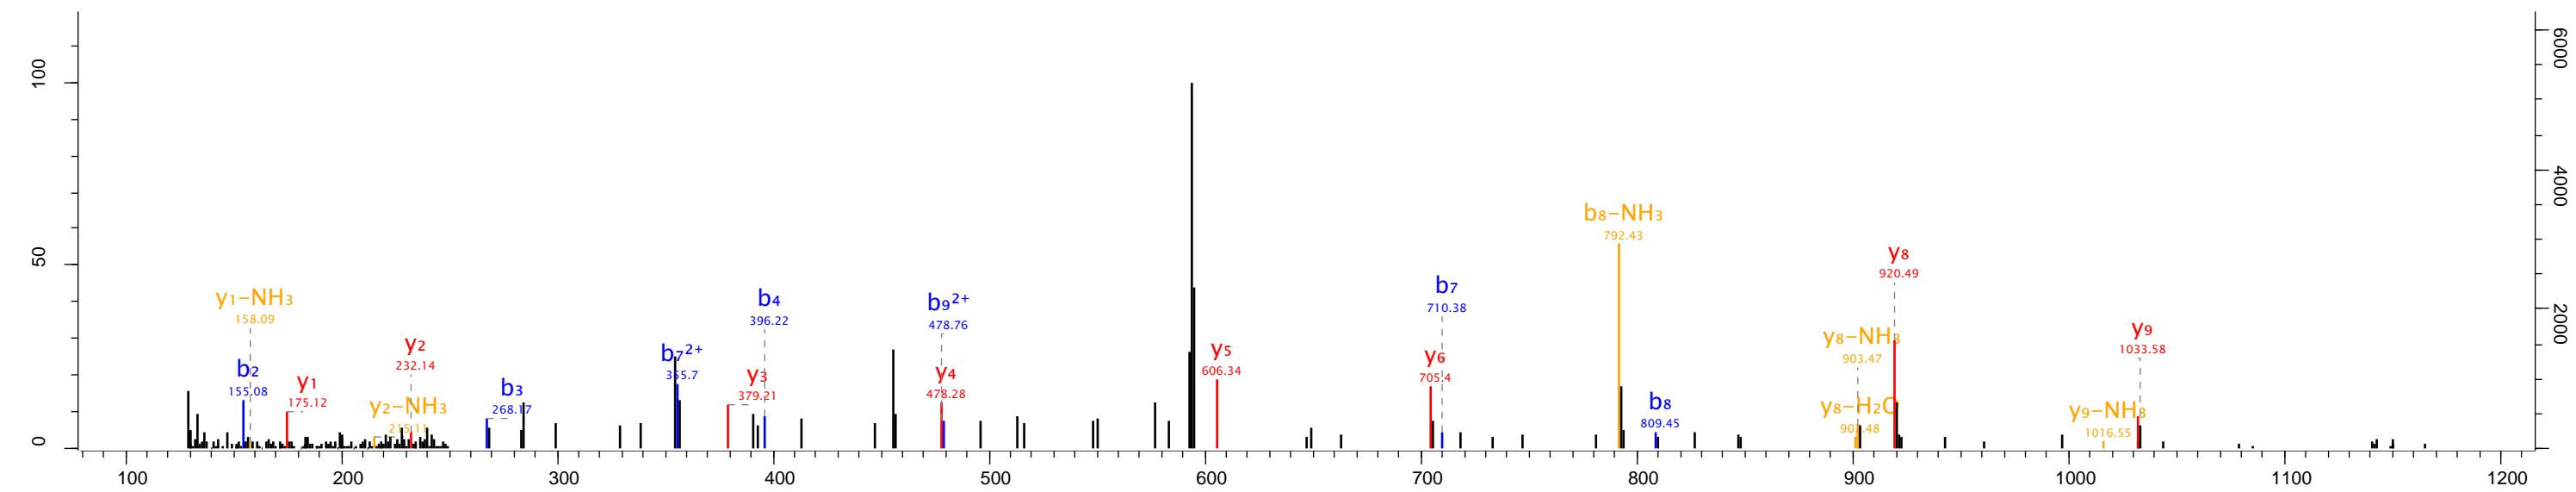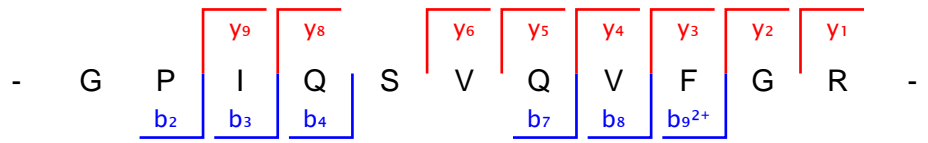

Spectral Annotation for Single-Peptide IDs in 16-cell Embryo using Q-OT-LIT

Raw file: 2015-01-05\_CL03\_XenEmb\_x2  
 Scan: 31410  
 Method: ITMS; HCD  
 Score: 62.59  
 m/z: 714.71

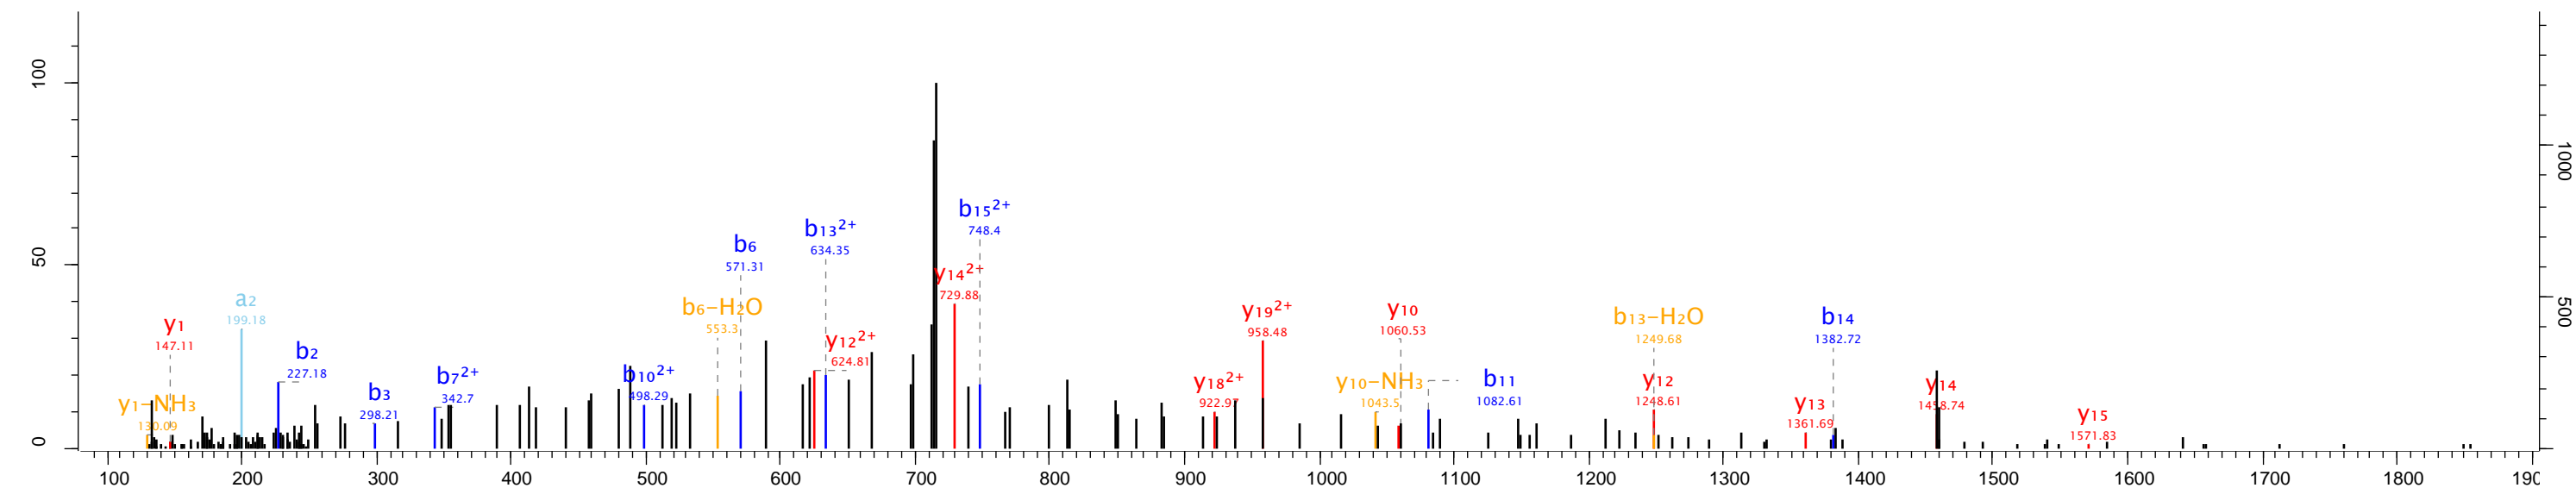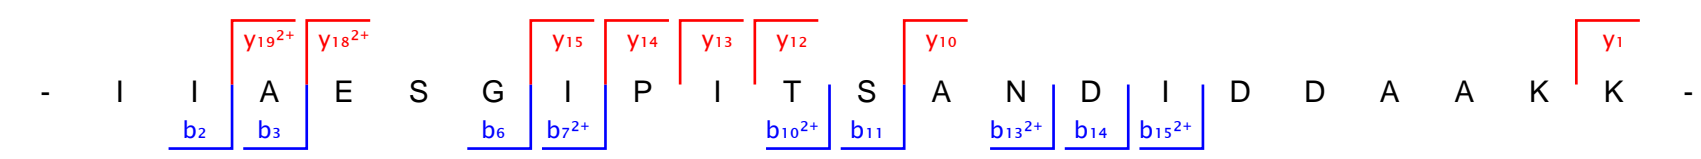



Raw file: 2015-01-05\_CL03\_XenEmb\_x2  
 Scan: 31525 Method: ITMS; HCD Score: 86.11 m/z: 624.84

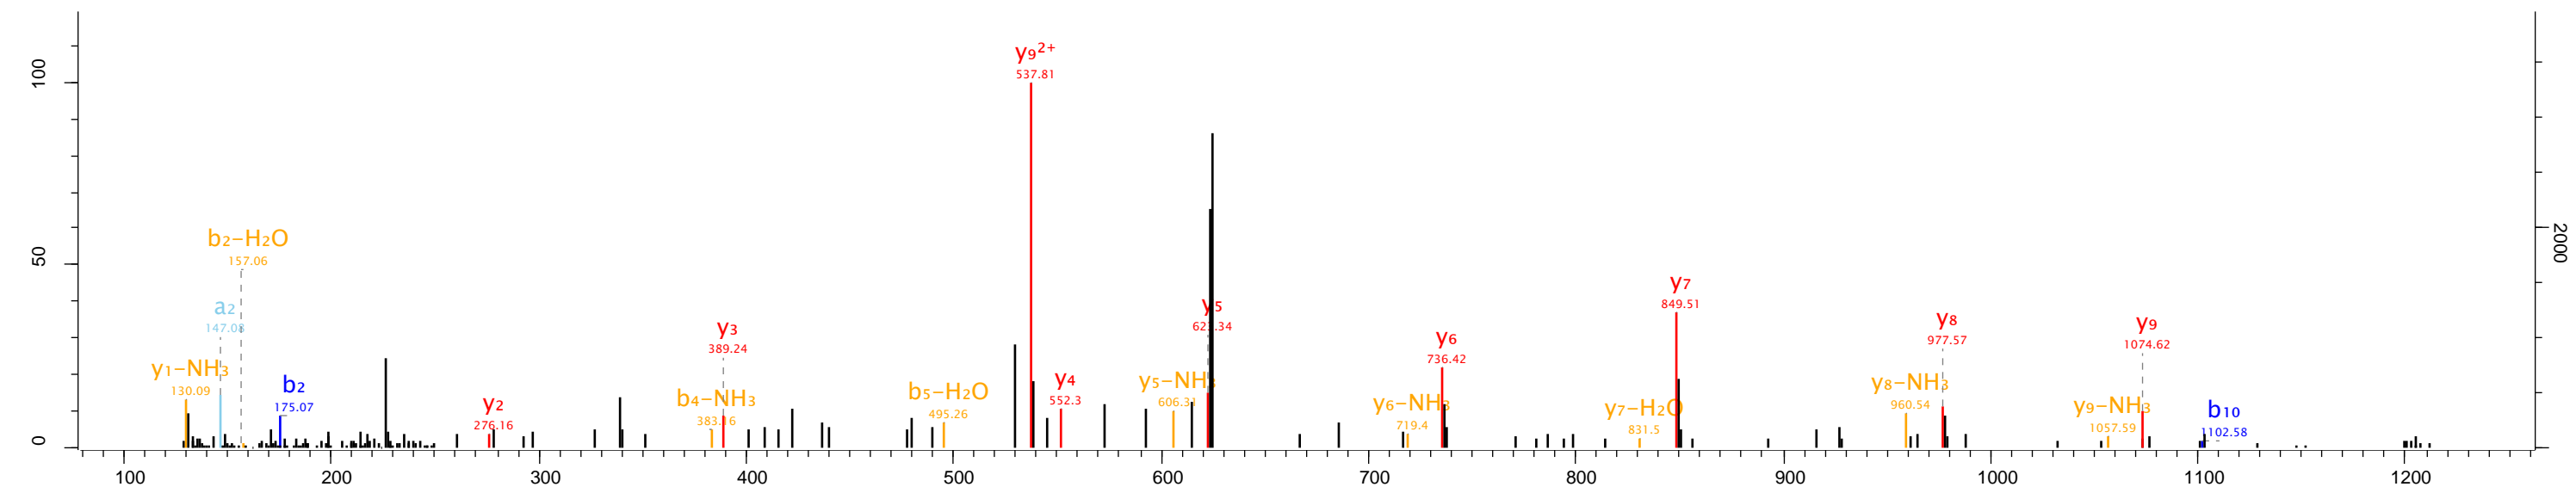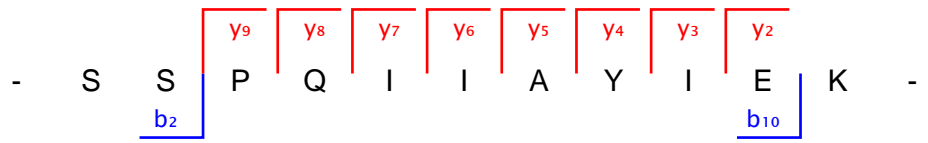

Raw file: 2015-01-05\_CL03\_XenEmb\_x2  
 Scan: 31547 Method: ITMS; HCD Score: 75.79 m/z: 624.84

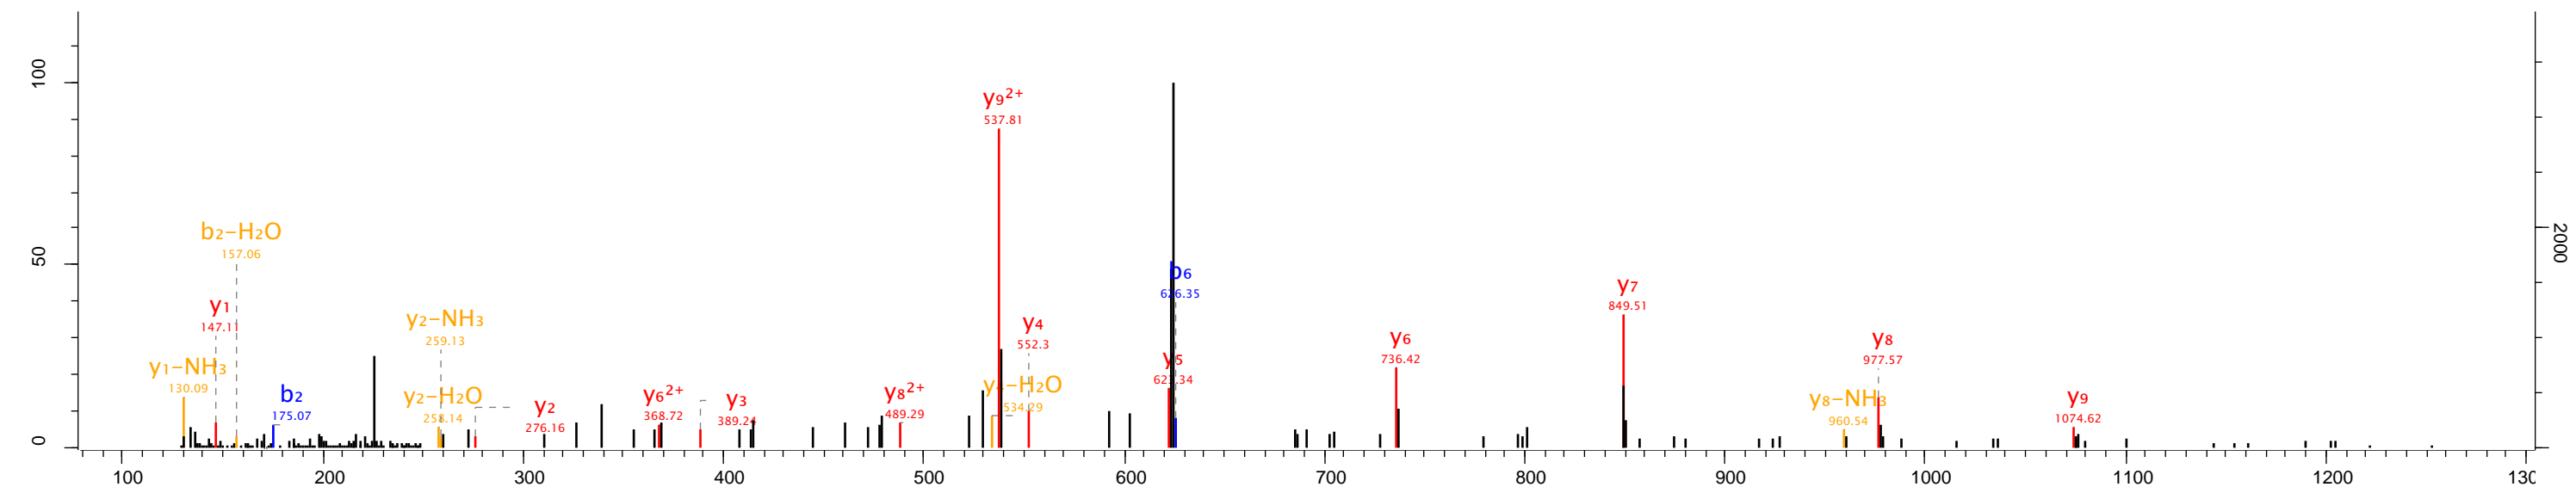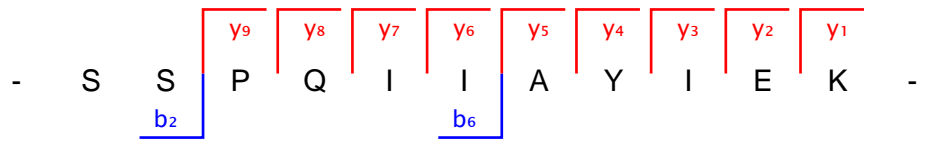

Spectral Annotation for Single-Peptide IDs in 16-cell Embryo using Q-OT-LIT

Raw file 2015-01-05\_CL03\_XenEmb\_x2 Scan 31631 Method ITMS; HCD Score 70.94 m/z 633.81

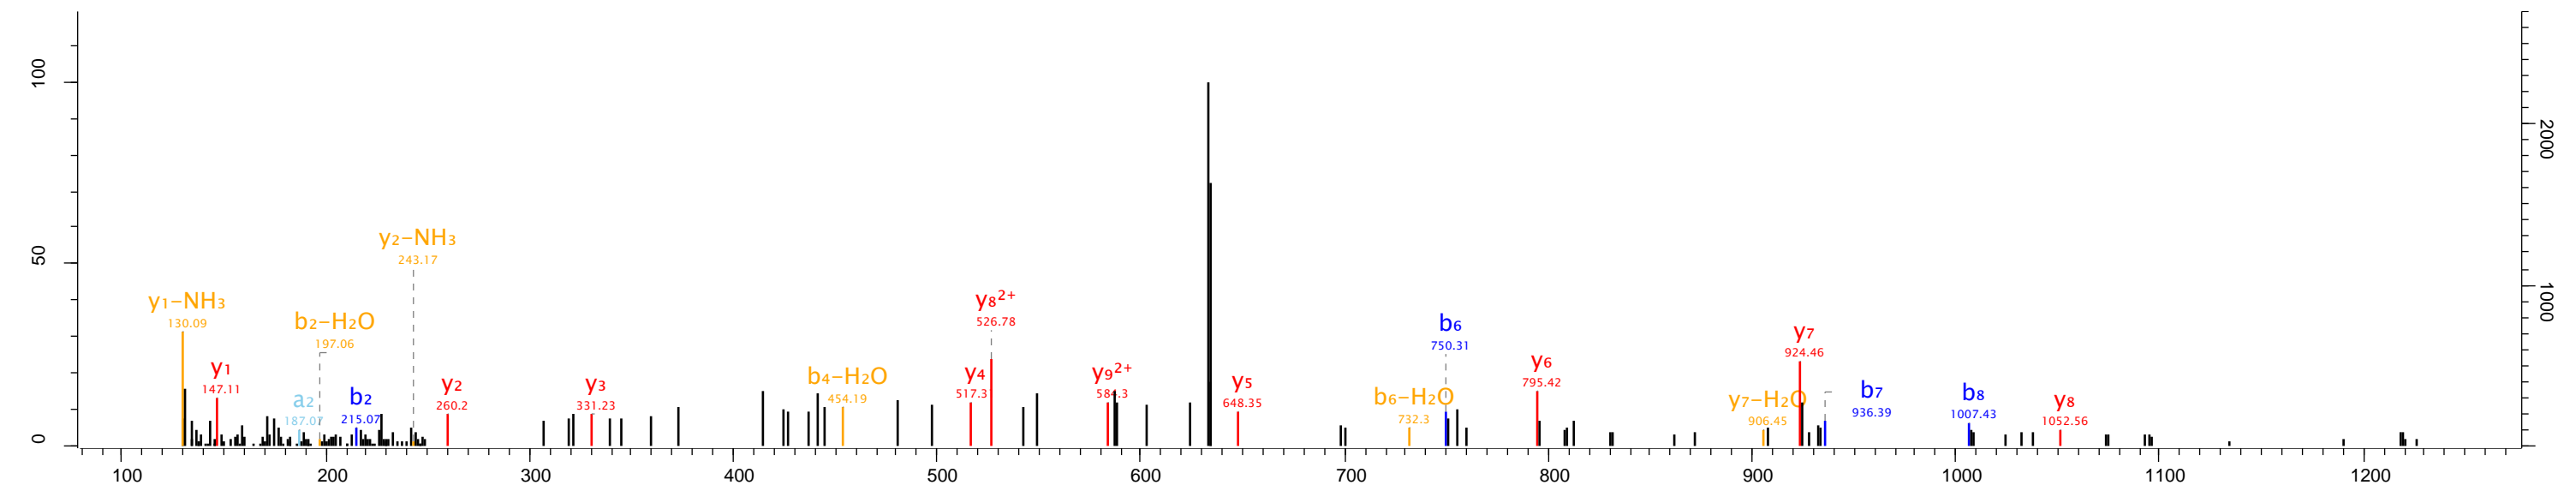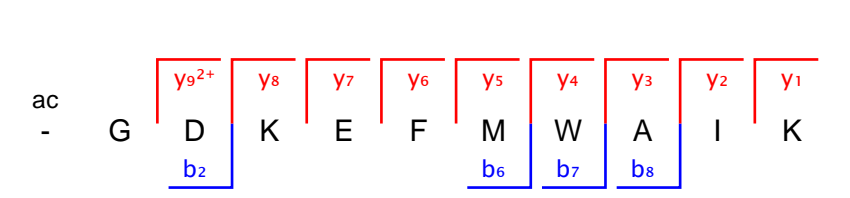

Raw file: 2015-01-05\_CL03\_XenEmb\_x2  
 Scan: 31648  
 Method: ITMS; HCD  
 Score: 54.67  
 m/z: 758.37

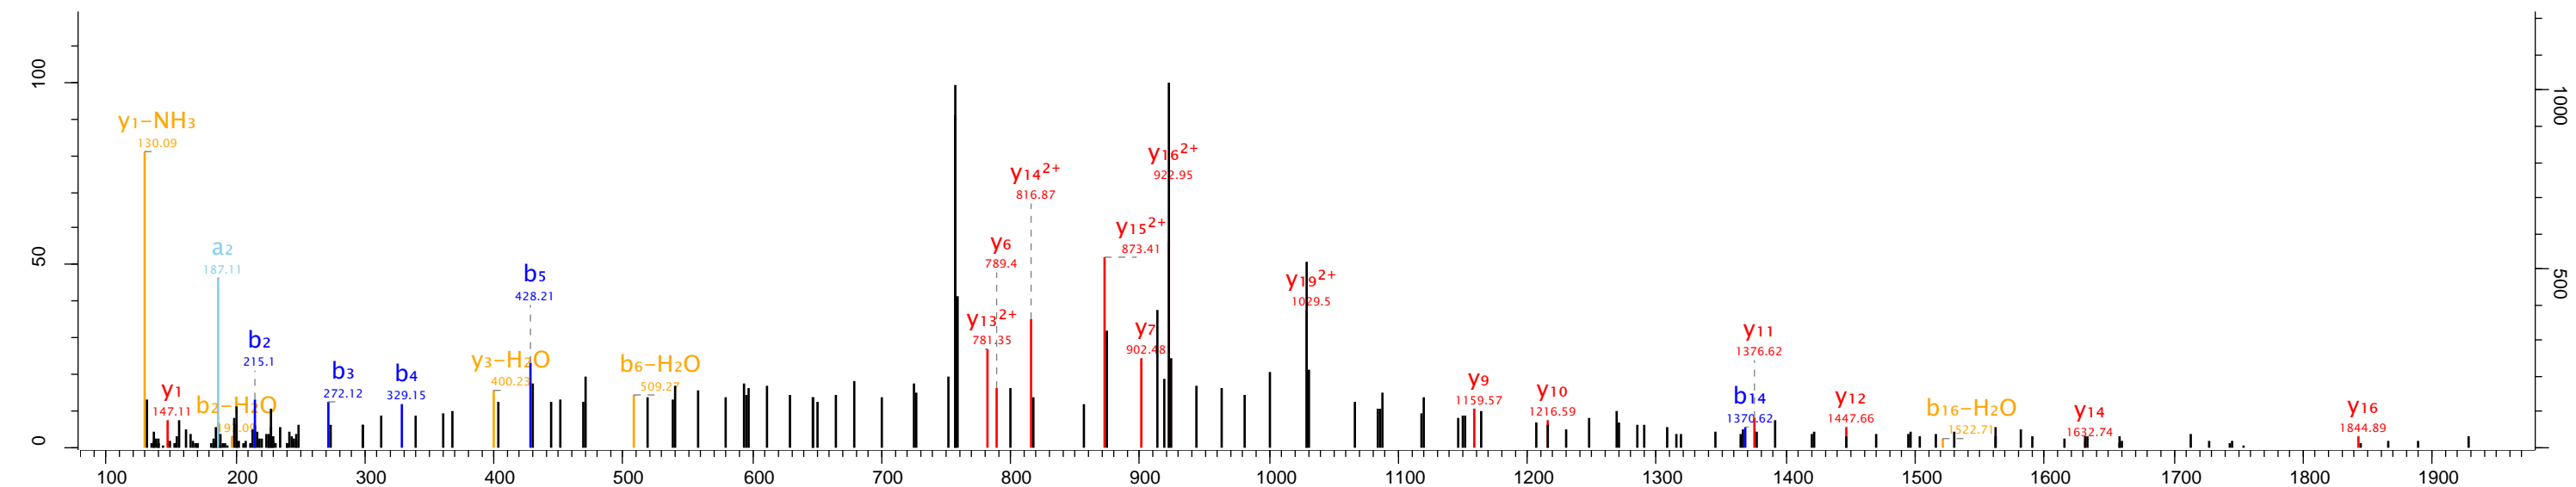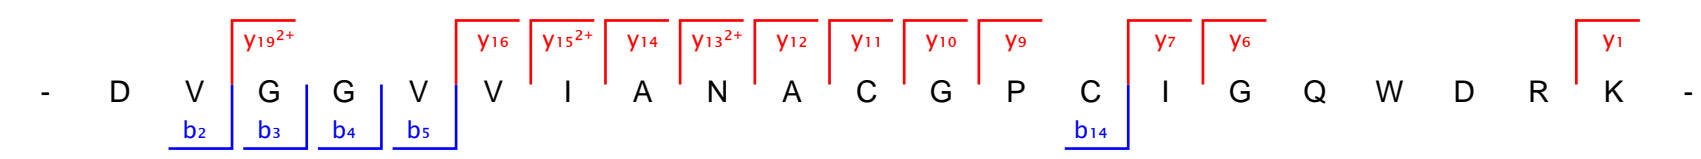

Raw file: 2015-01-05\_CL03\_XenEmb\_x2  
 Scan: 31722 Method: ITMS; HCD Score: 52.32 m/z: 682.38

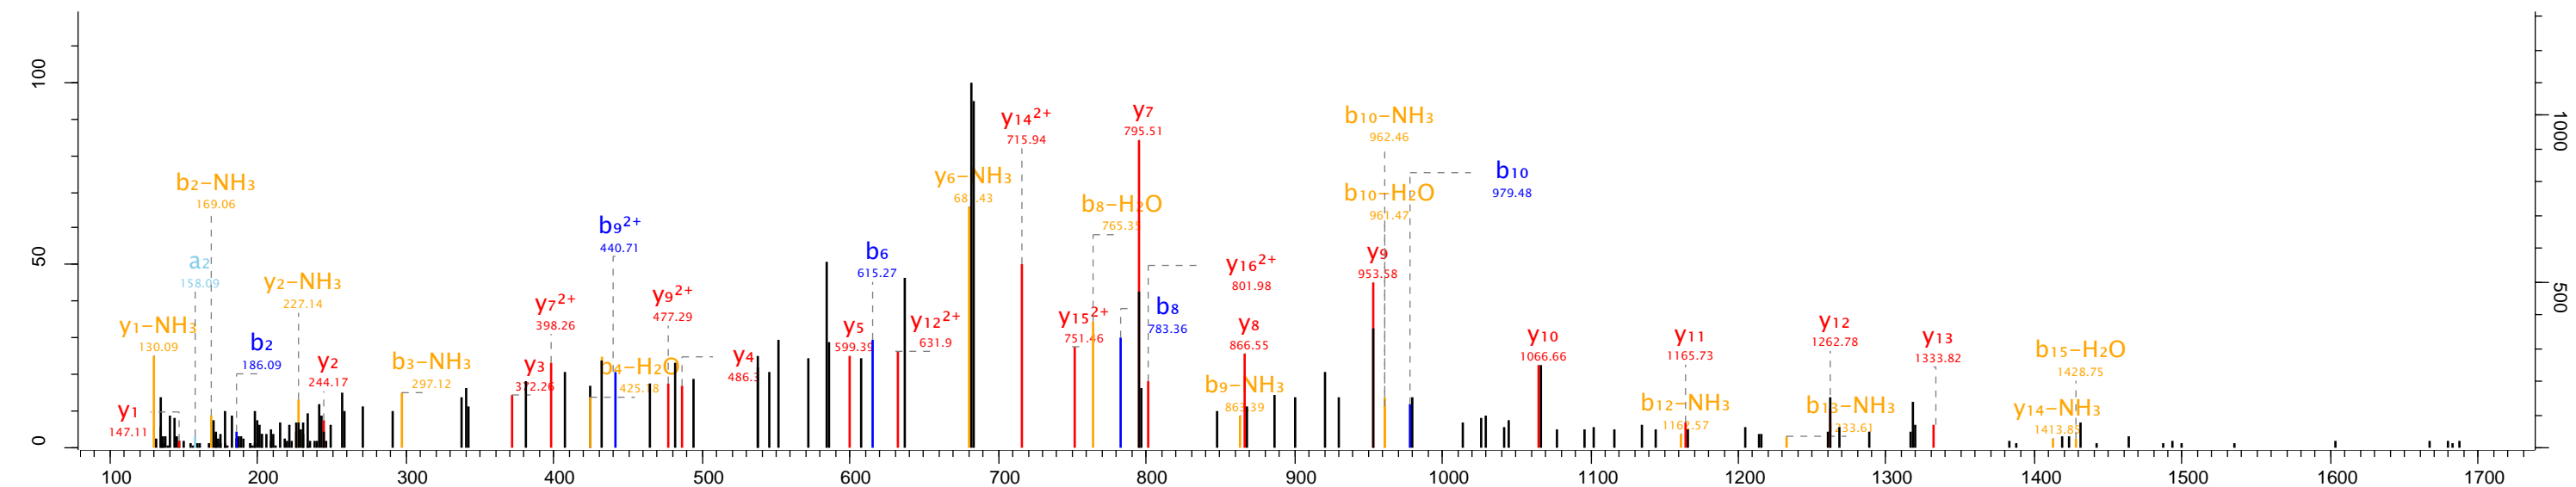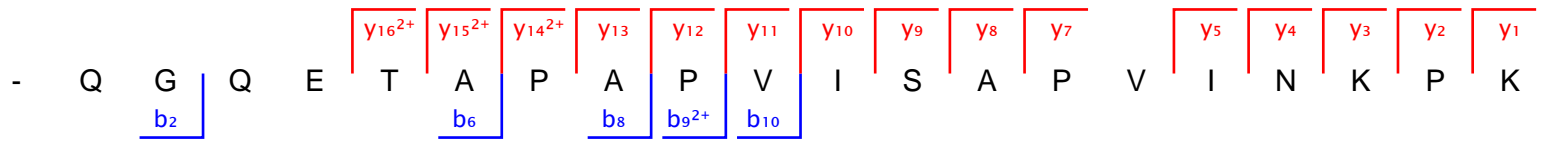

Spectral Annotation for Single-Peptide IDs in 16-cell Embryo using Q-OT-LIT

Raw file: 2015-01-05\_CL03\_XenEmb\_x2  
 Scan: 31750 Method: ITMS; HCD Score: 48.38 m/z: 682.72

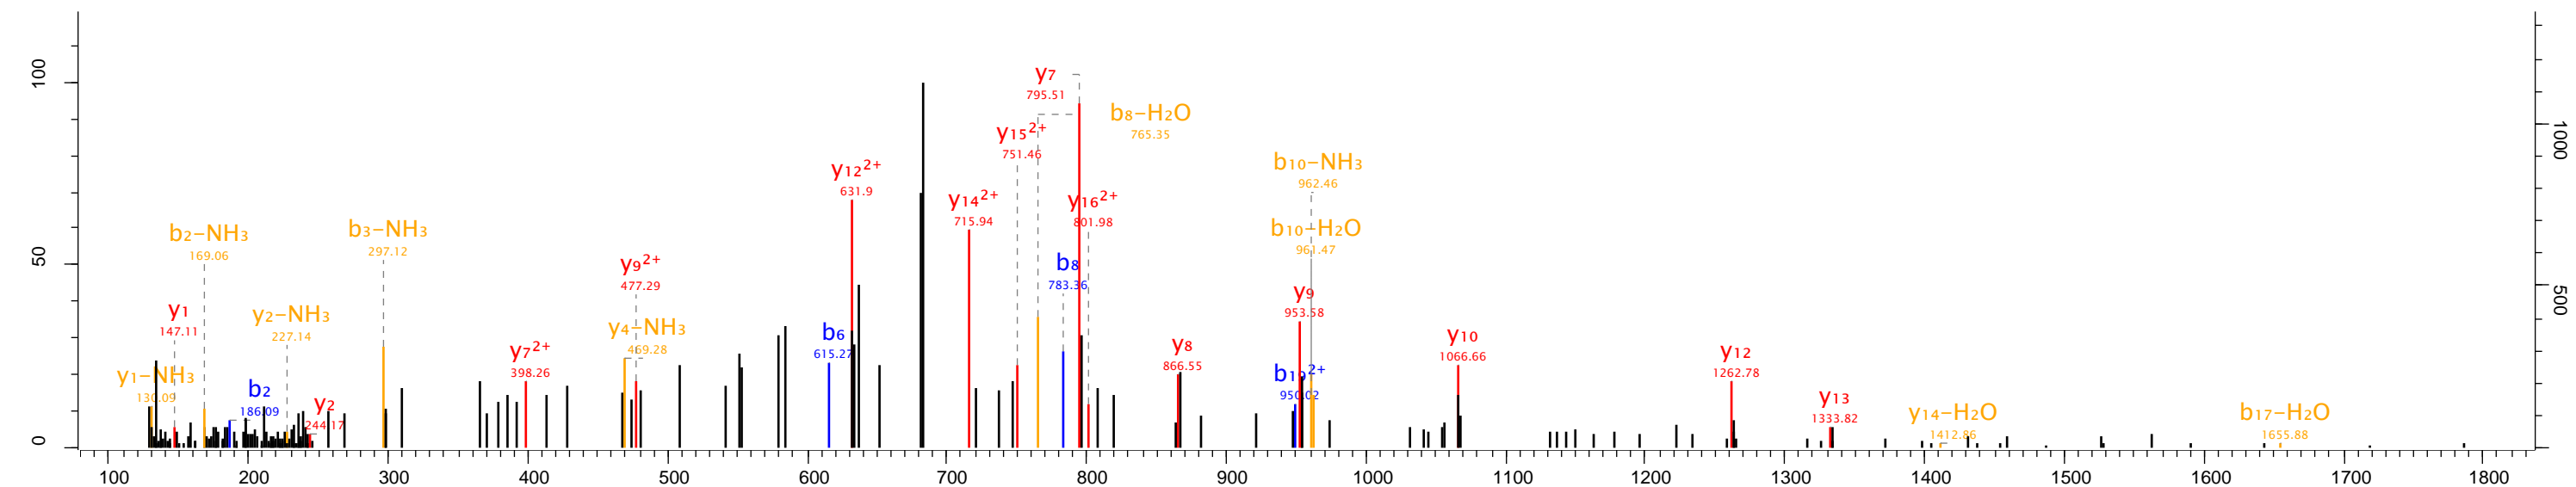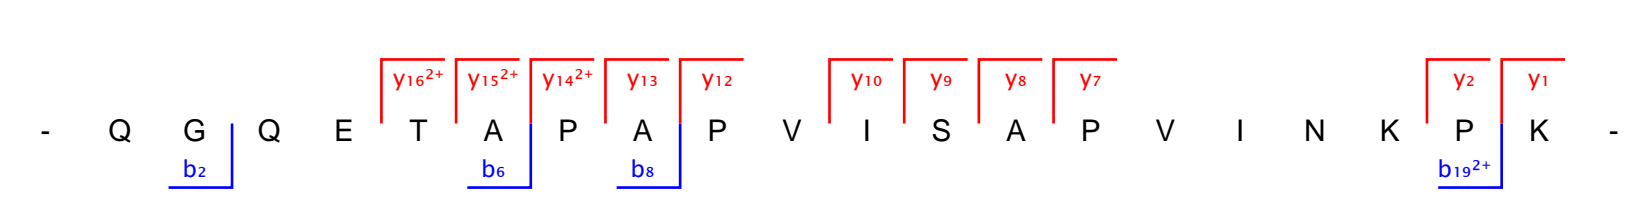

Spectral Annotation for Single-Peptide IDs in 16-cell Embryo using Q-OT-LIT

Raw file: 2015-01-05\_CL03\_XenEmb\_x2  
 Scan: 31769  
 Method: ITMS; HCD  
 Score: 68.26  
 m/z: 682.72

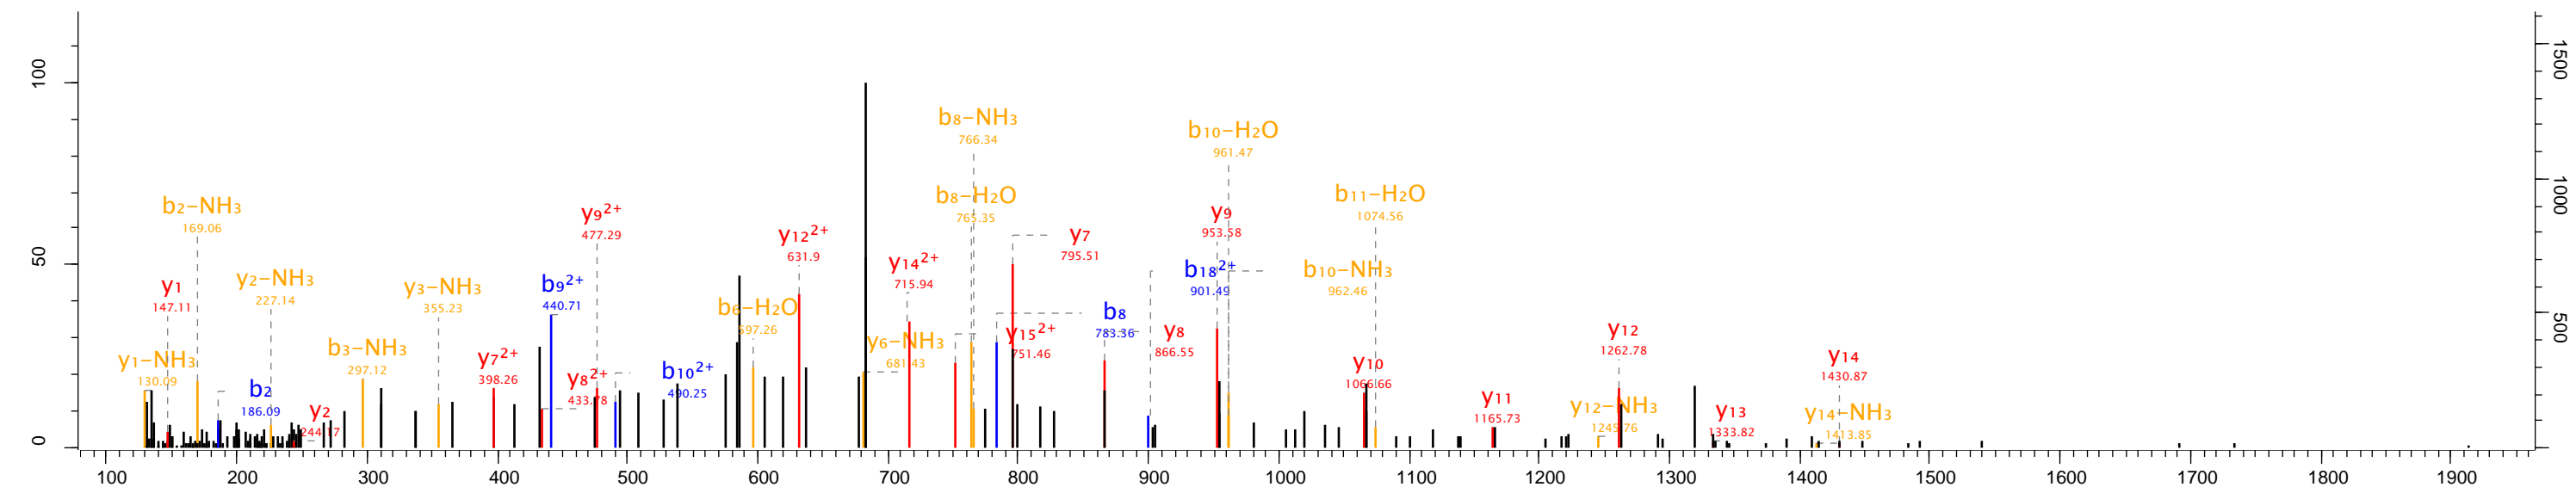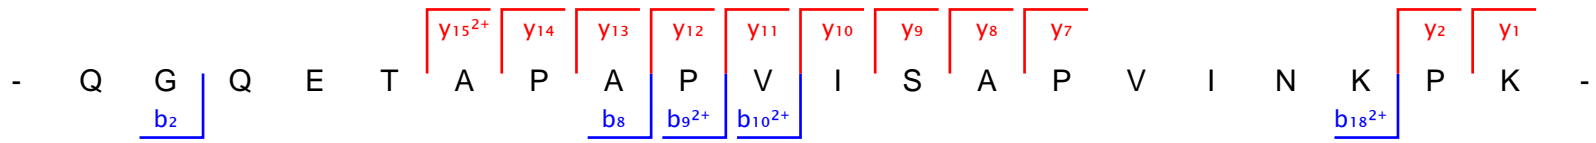

Spectral Annotation for Single-Peptide IDs in 16-cell Embryo using Q-OT-LIT

Raw file 2015-01-05\_CL03\_XenEmb\_x2  
 Scan 31785 Method ITMS; HCD Score 69.08 m/z 682.72

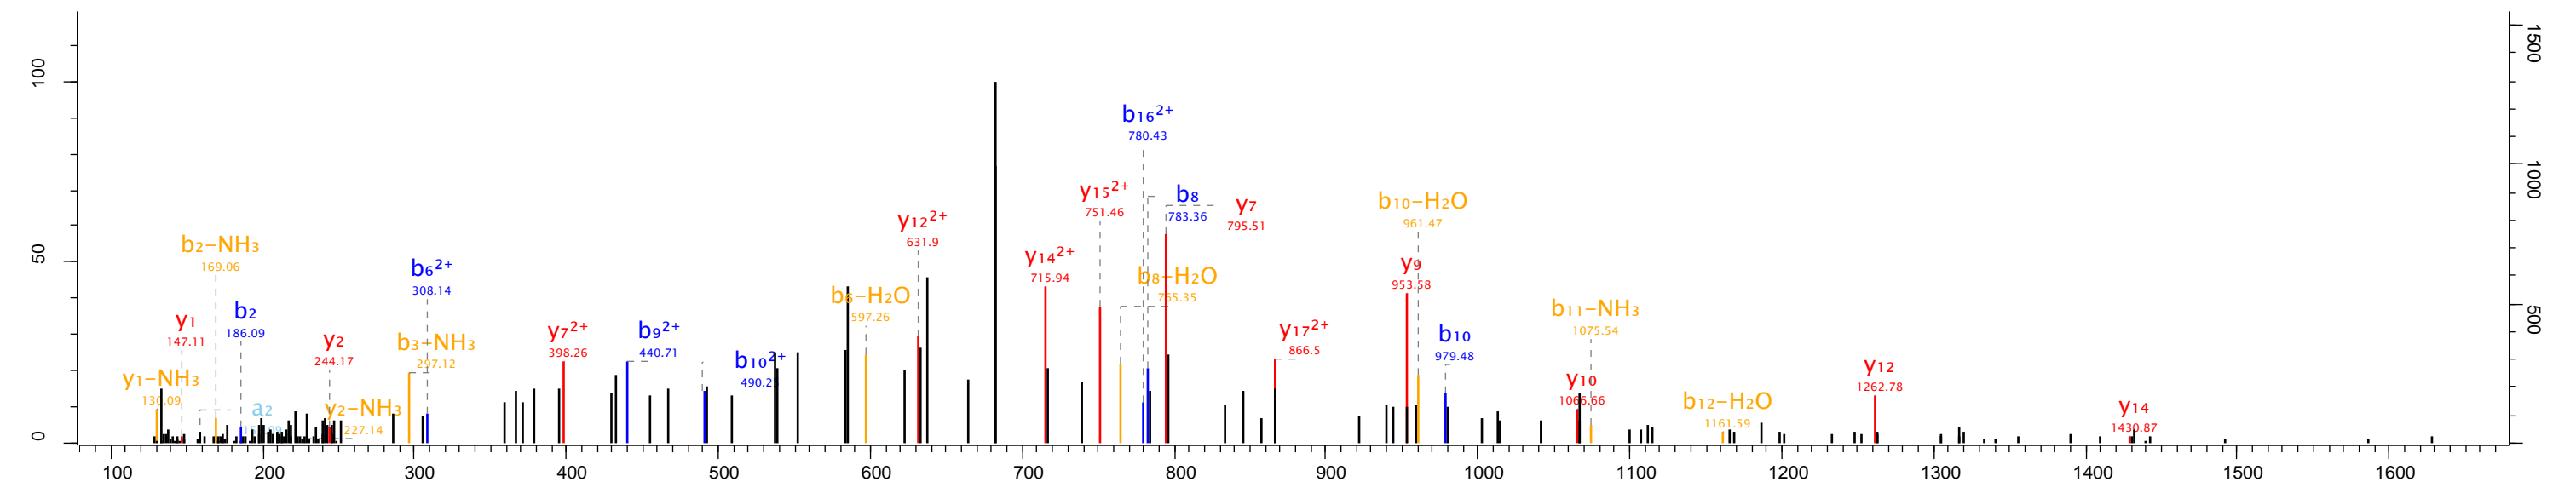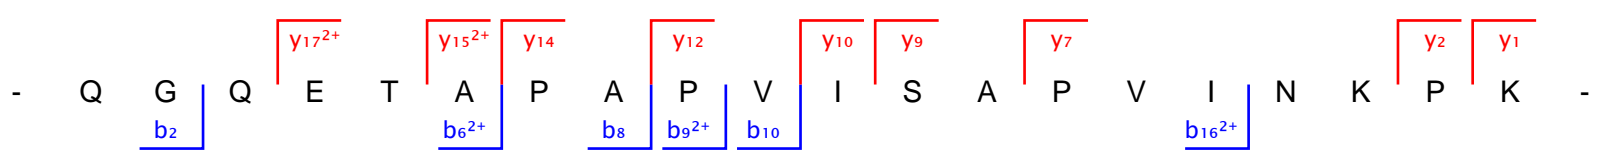

Spectral Annotation for Single-Peptide IDs in 16-cell Embryo using Q-OT-LIT



Raw file 2015-01-05\_CL03\_XenEmb\_x2  
 Scan 31872 Method ITMS; HCD Score 49.53 m/z 775.42

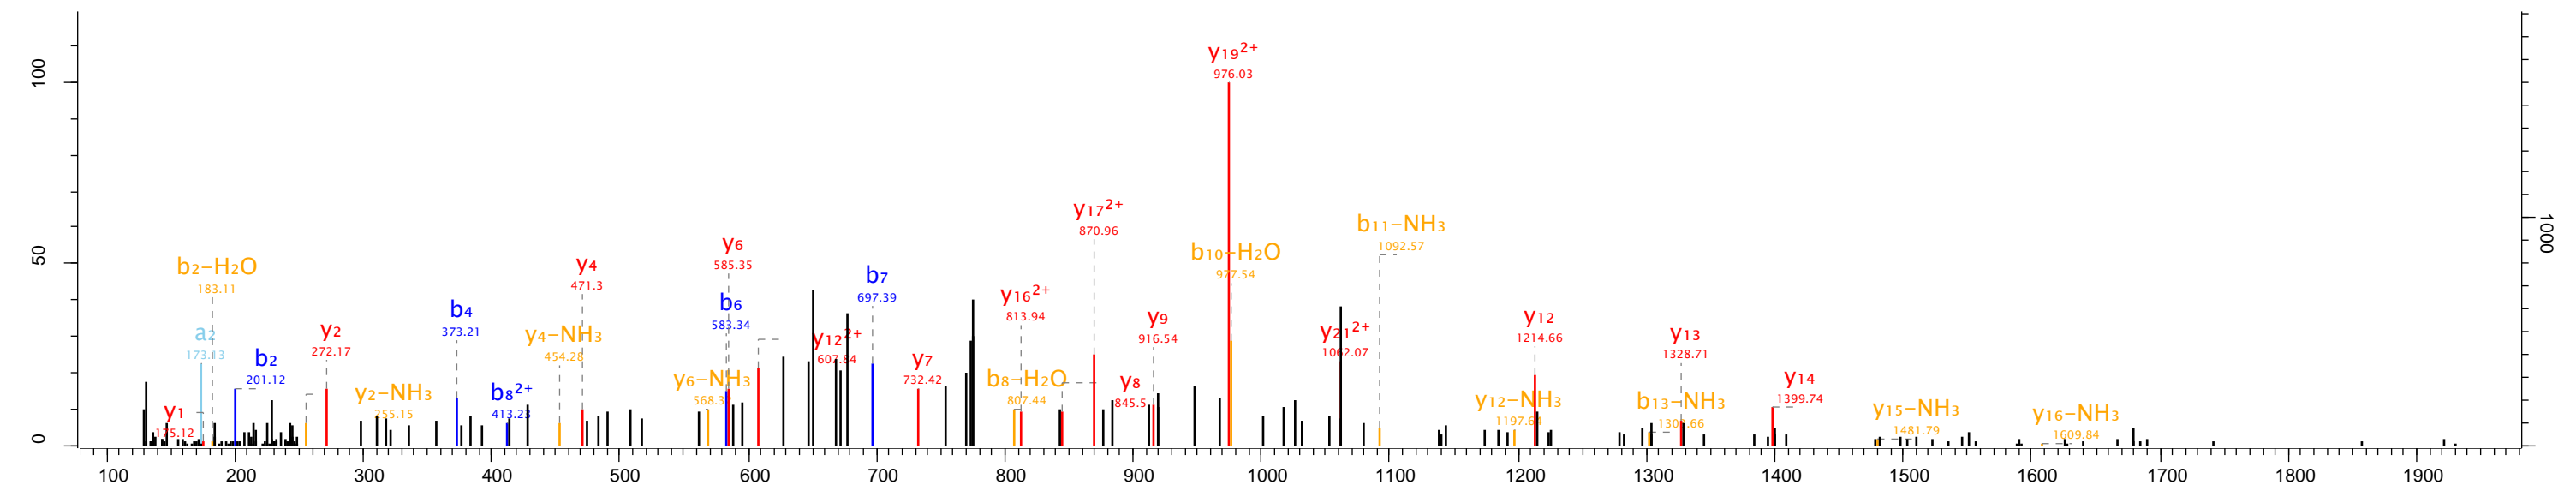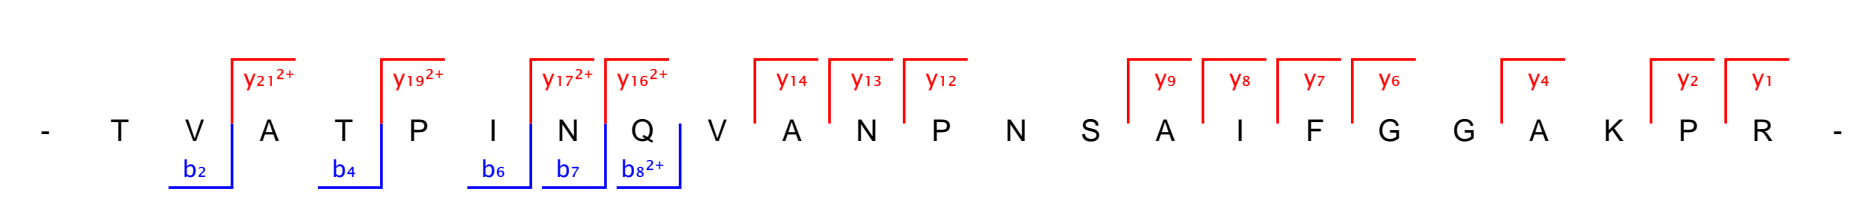

Raw file: 2015-01-05\_CL03\_XenEmb\_x2  
 Scan: 31920 Method: ITMS; HCD Score: 65.15 m/z: 775.76

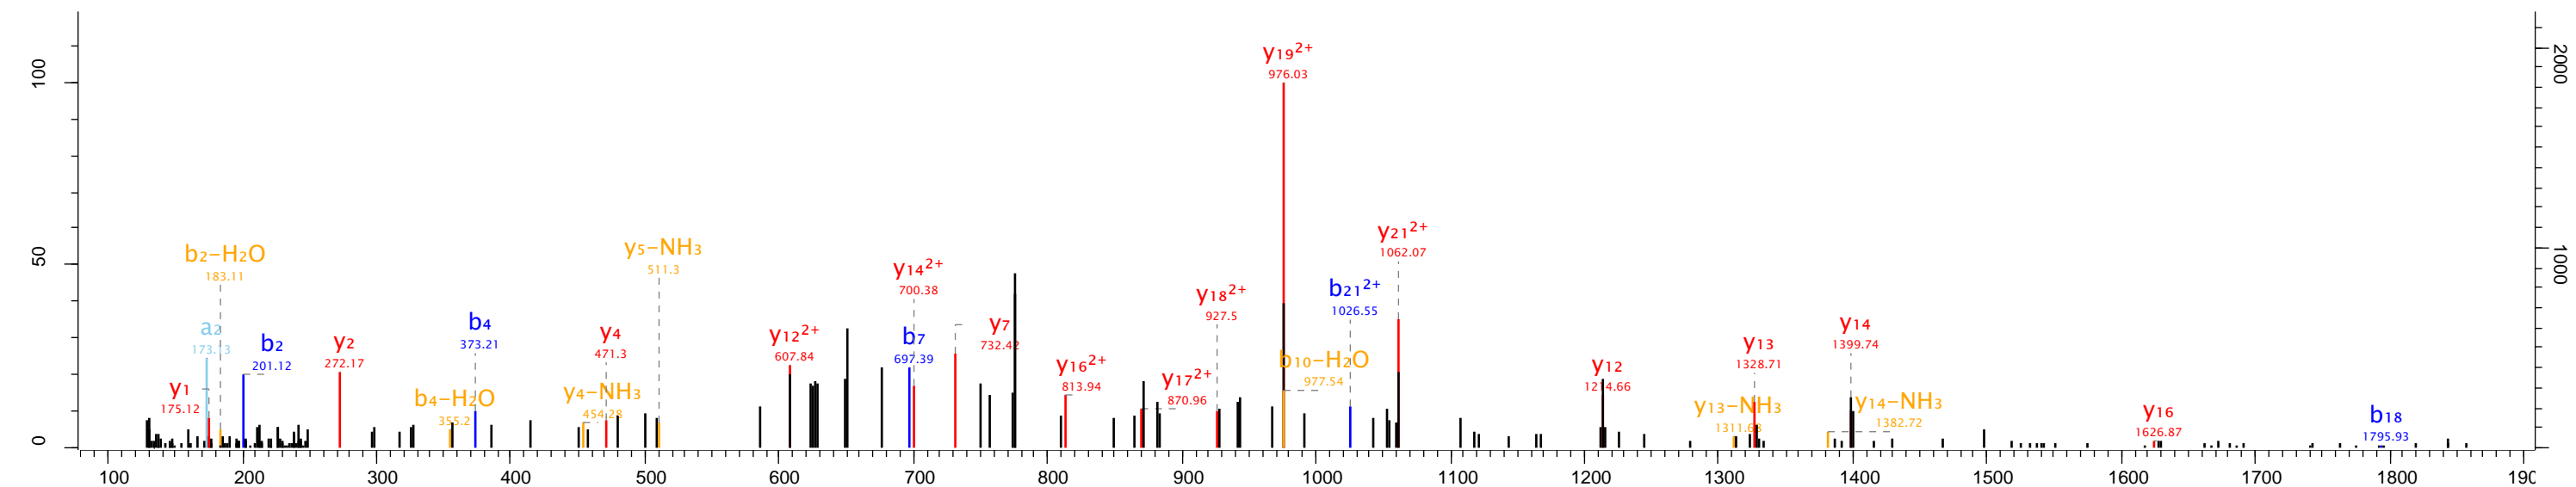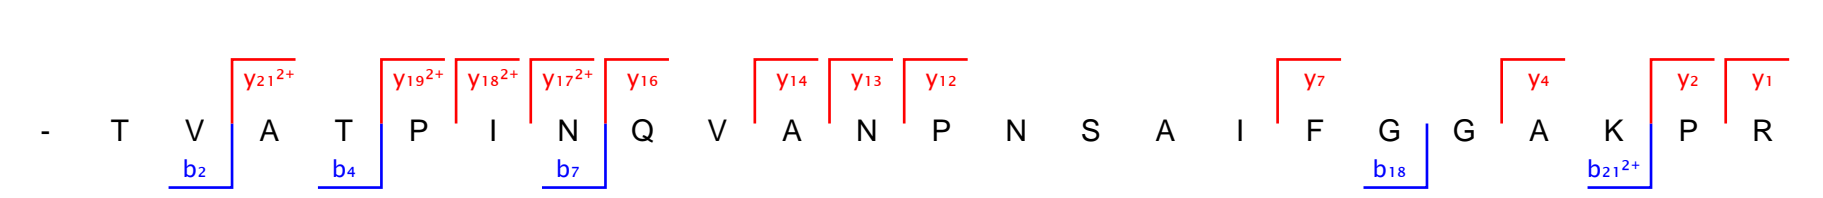

Spectral Annotation for Single-Peptide IDs in 16-cell Embryo using Q-OT-LIT



Raw file: 2015-01-05\_CL03\_XenEmb\_x2  
 Scan: 32069 Method: ITMS; HCD Score: 69.82 m/z: 571.31

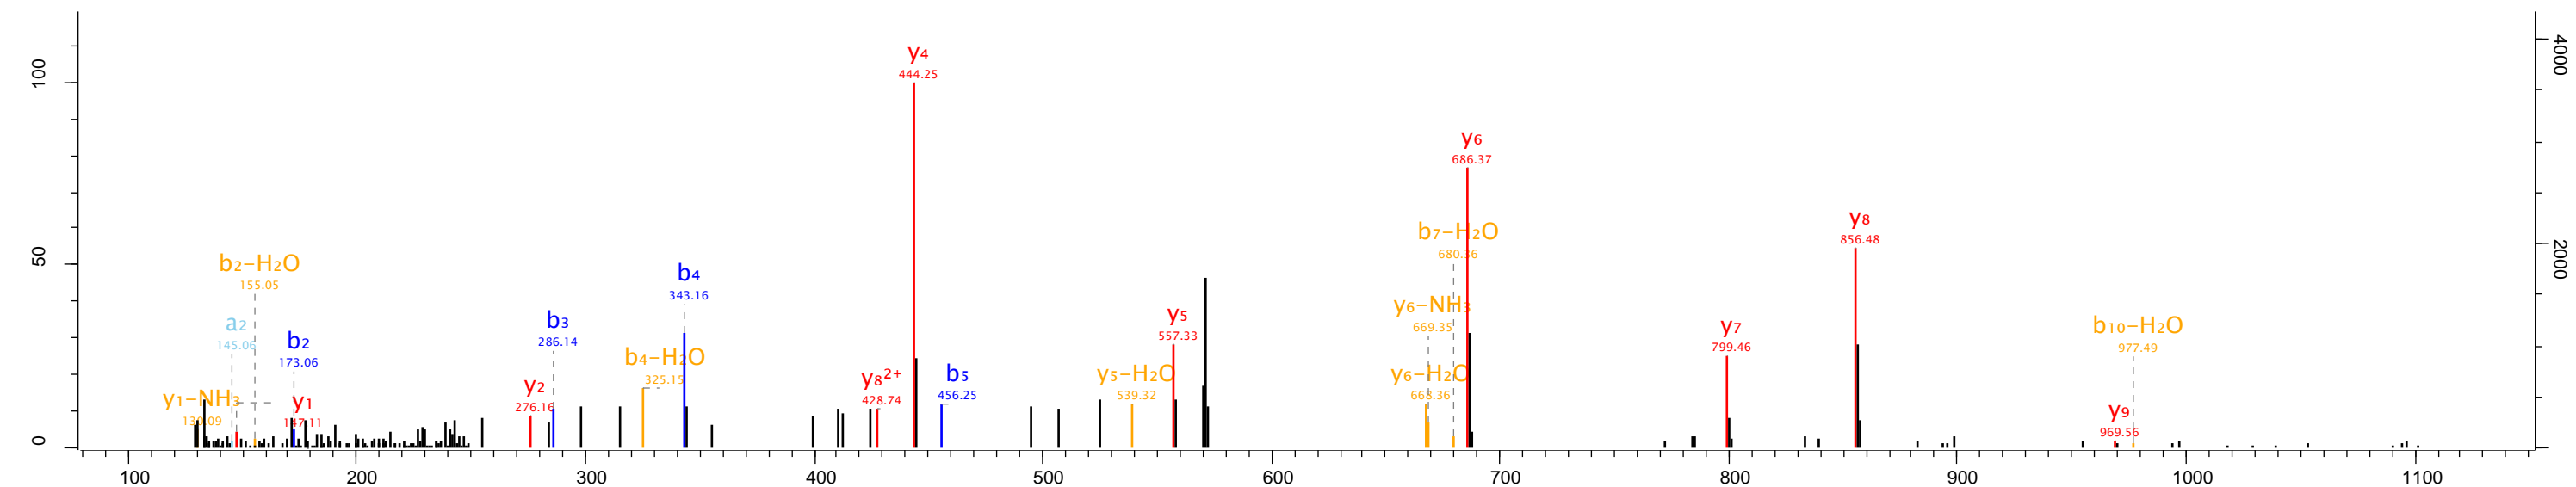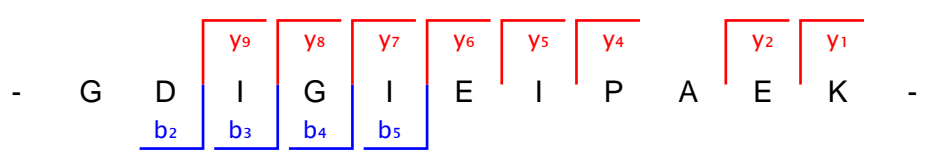

Spectral Annotation for Single-Peptide IDs in 16-cell Embryo using Q-OT-LIT

Raw file 2015-01-05\_CL03\_XenEmb\_x2 Scan 32085 Method ITMS; HCD Score 72.34 m/z 571.31

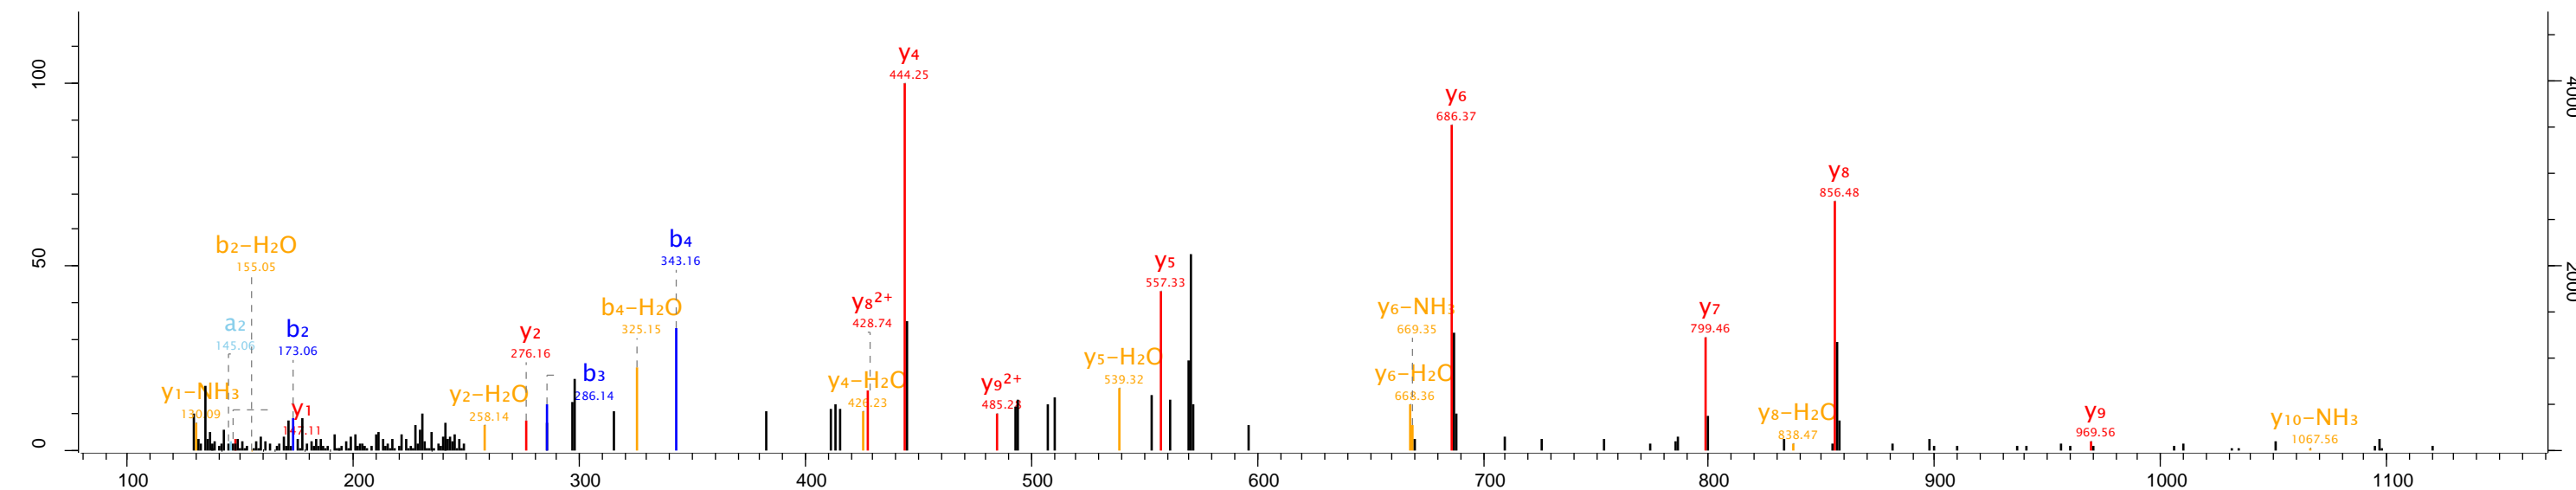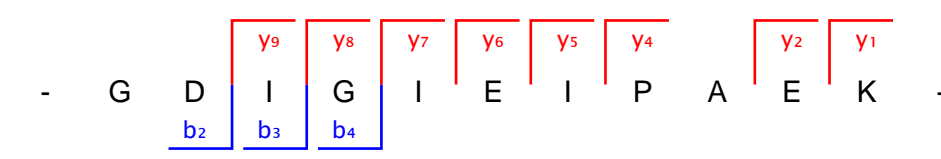

Raw file: 2015-01-05\_CL03\_XenEmb\_x2  
 Scan: 32394 Method: ITMS; HCD Score: 80.17 m/z: 565.3

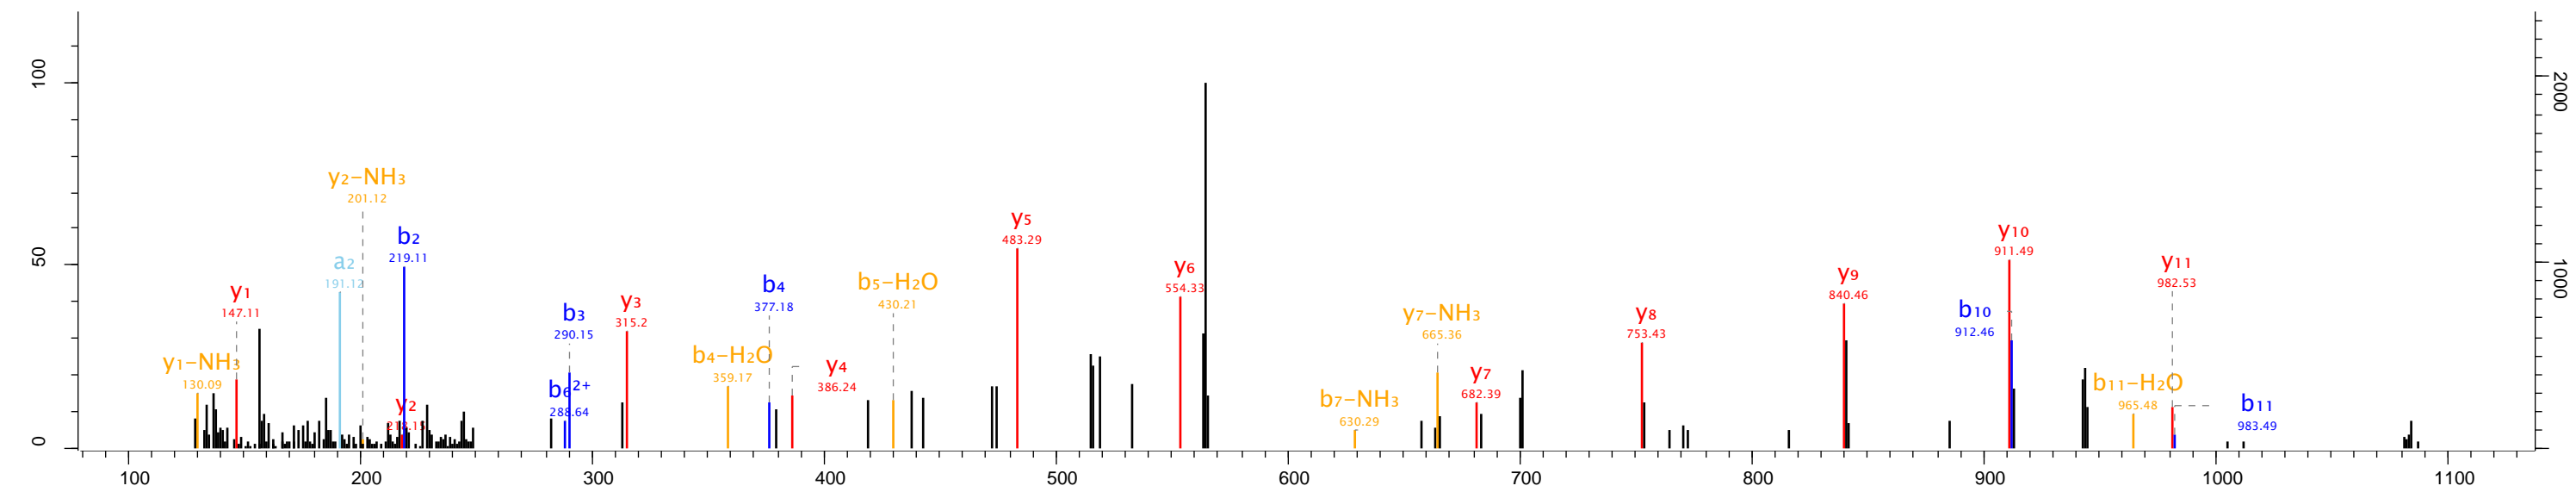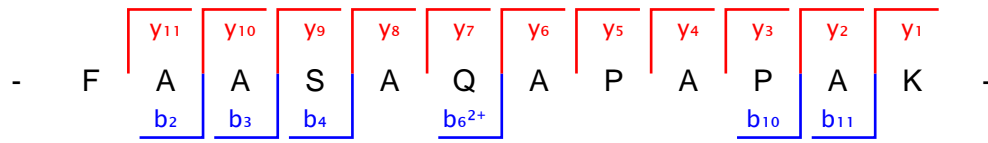

Spectral Annotation for Single-Peptide IDs in 16-cell Embryo using Q-OT-LIT

Raw file 2015-01-05\_CL03\_XenEmb\_x2 Scan 32811 Method ITMS; HCD Score 85.86 m/z 594.23

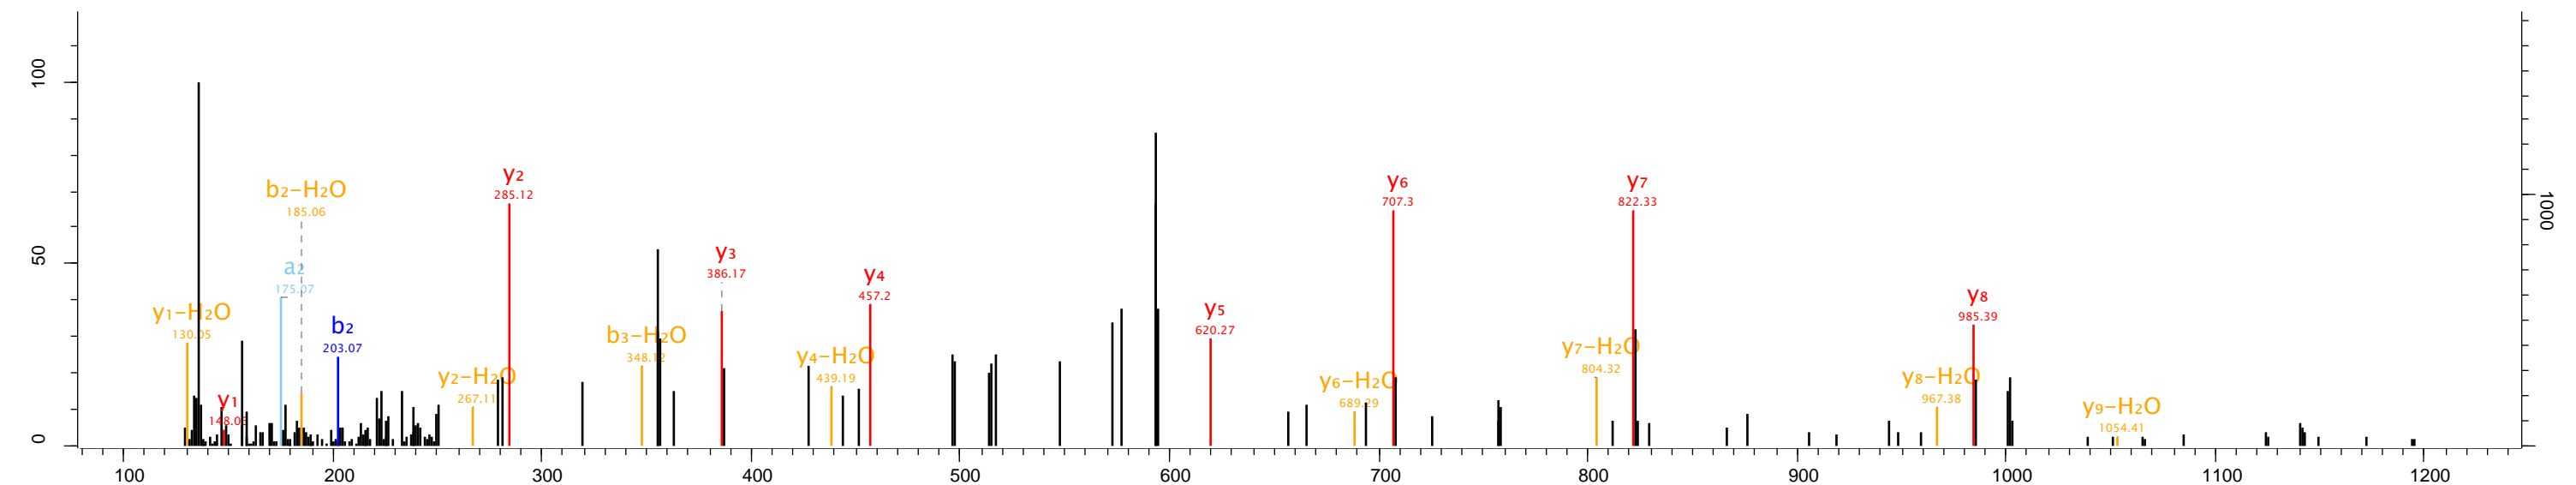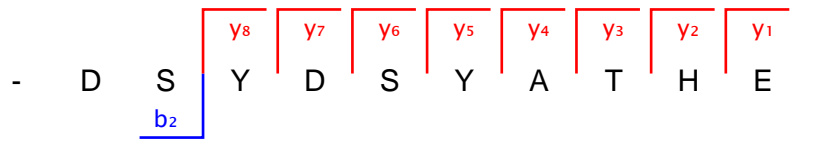

Spectral Annotation for Single-Peptide IDs in 16-cell Embryo using Q-OT-LIT

Raw file: 2015-01-05\_CL03\_XenEmb\_x2  
 Scan: 32857 Method: ITMS; HCD Score: 97.45 m/z: 614.33

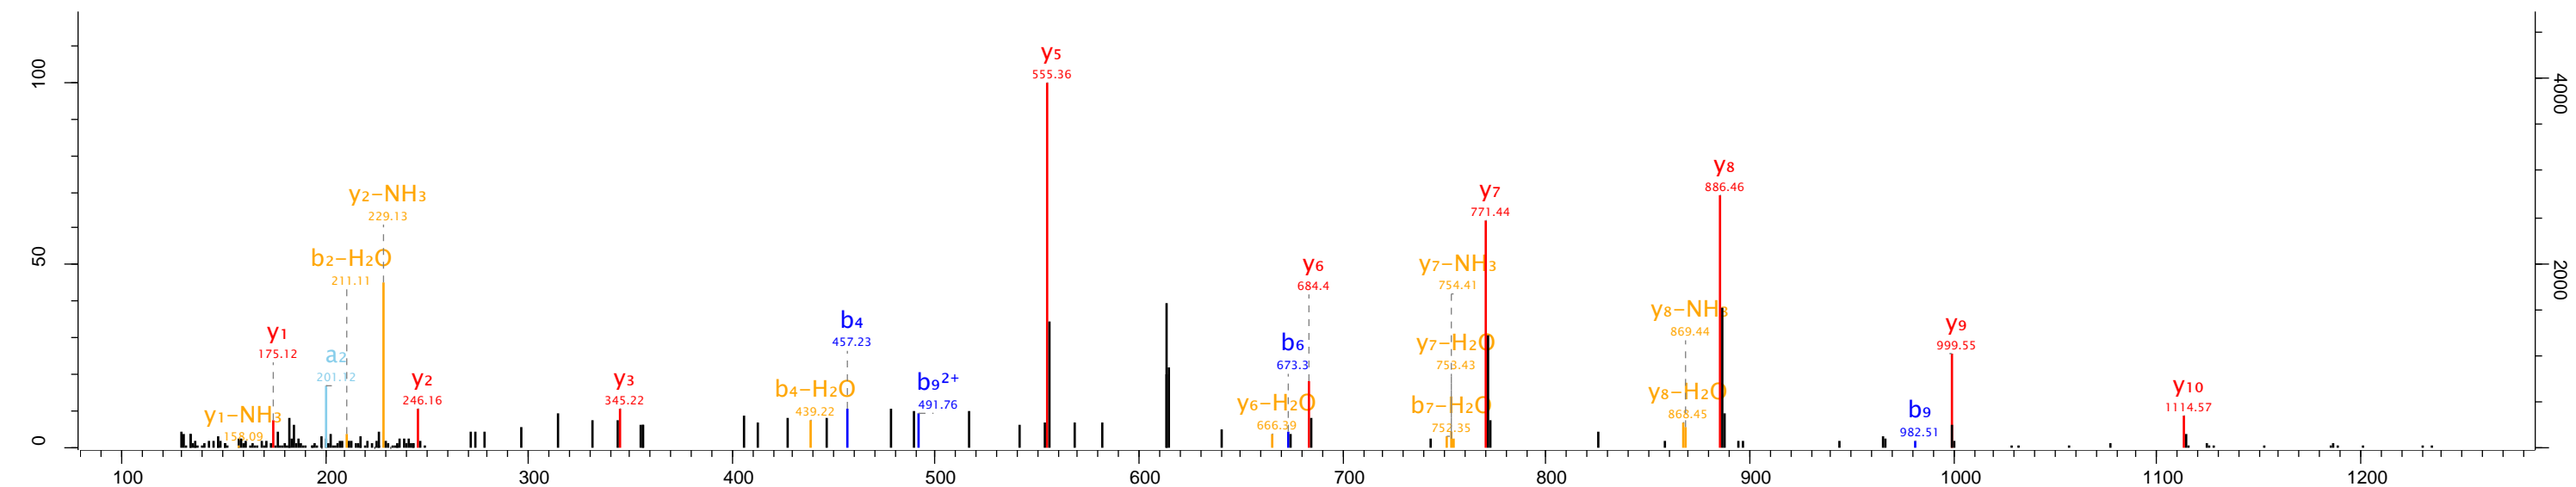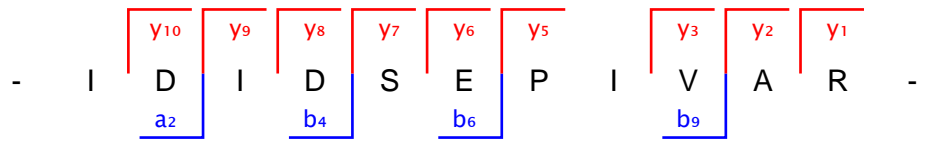

Spectral Annotation for Single-Peptide IDs in 16-cell Embryo using Q-OT-LIT



Raw file: 2015-01-05\_CL03\_XenEmb\_x2  
 Scan: 32875 Method: ITMS; HCD Score: 80.69 m/z: 632.82

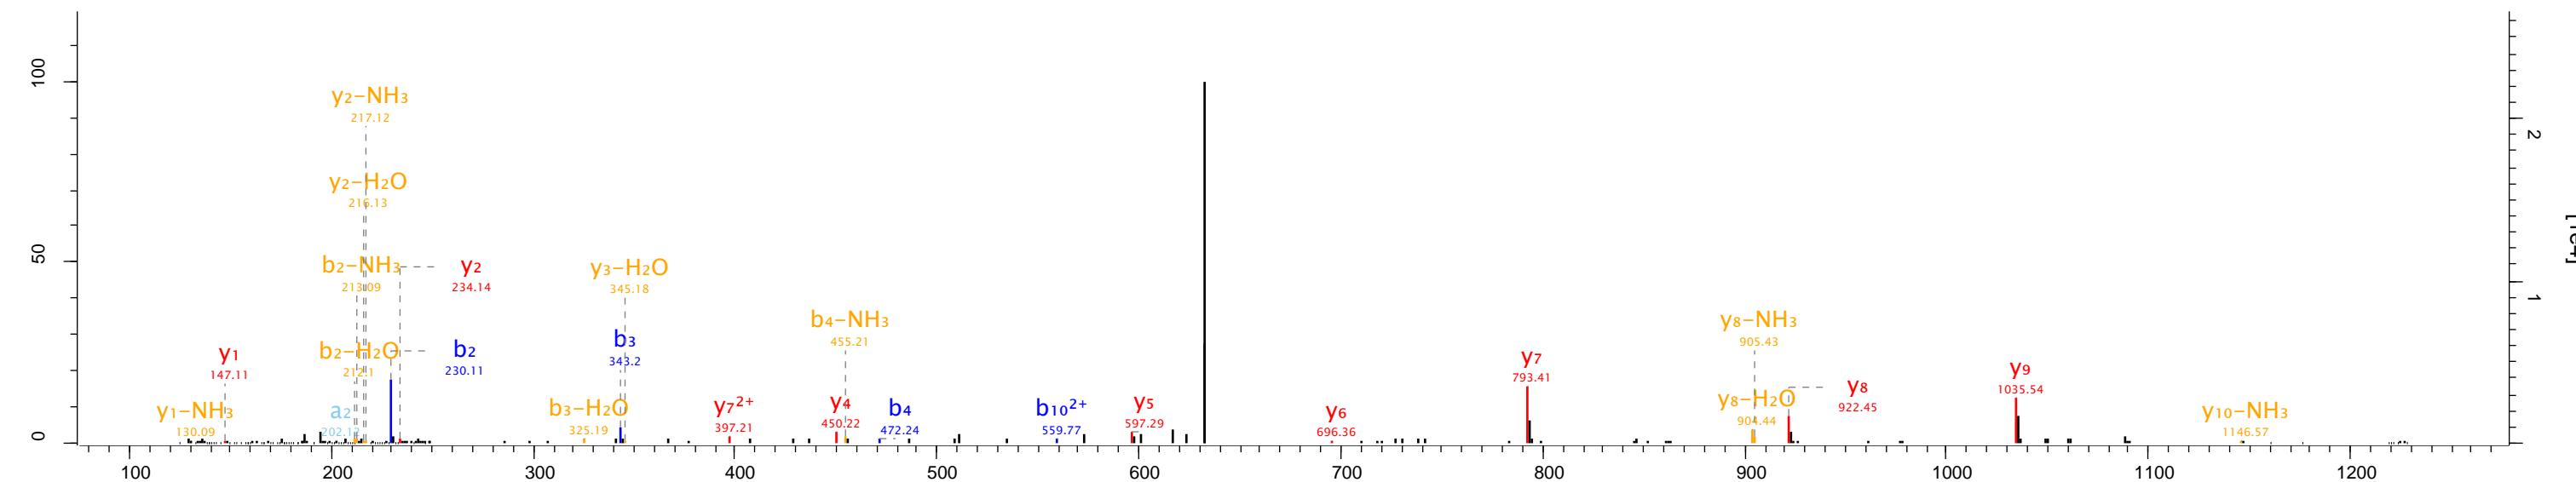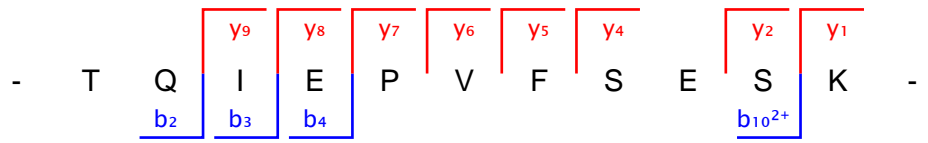

Spectral Annotation for Single-Peptide IDs in 16-cell Embryo using Q-OT-LIT

Raw file 2015-01-05\_CL03\_XenEmb\_x2 Scan 32904 Method ITMS; HCD Score 119.03 m/z 632.83

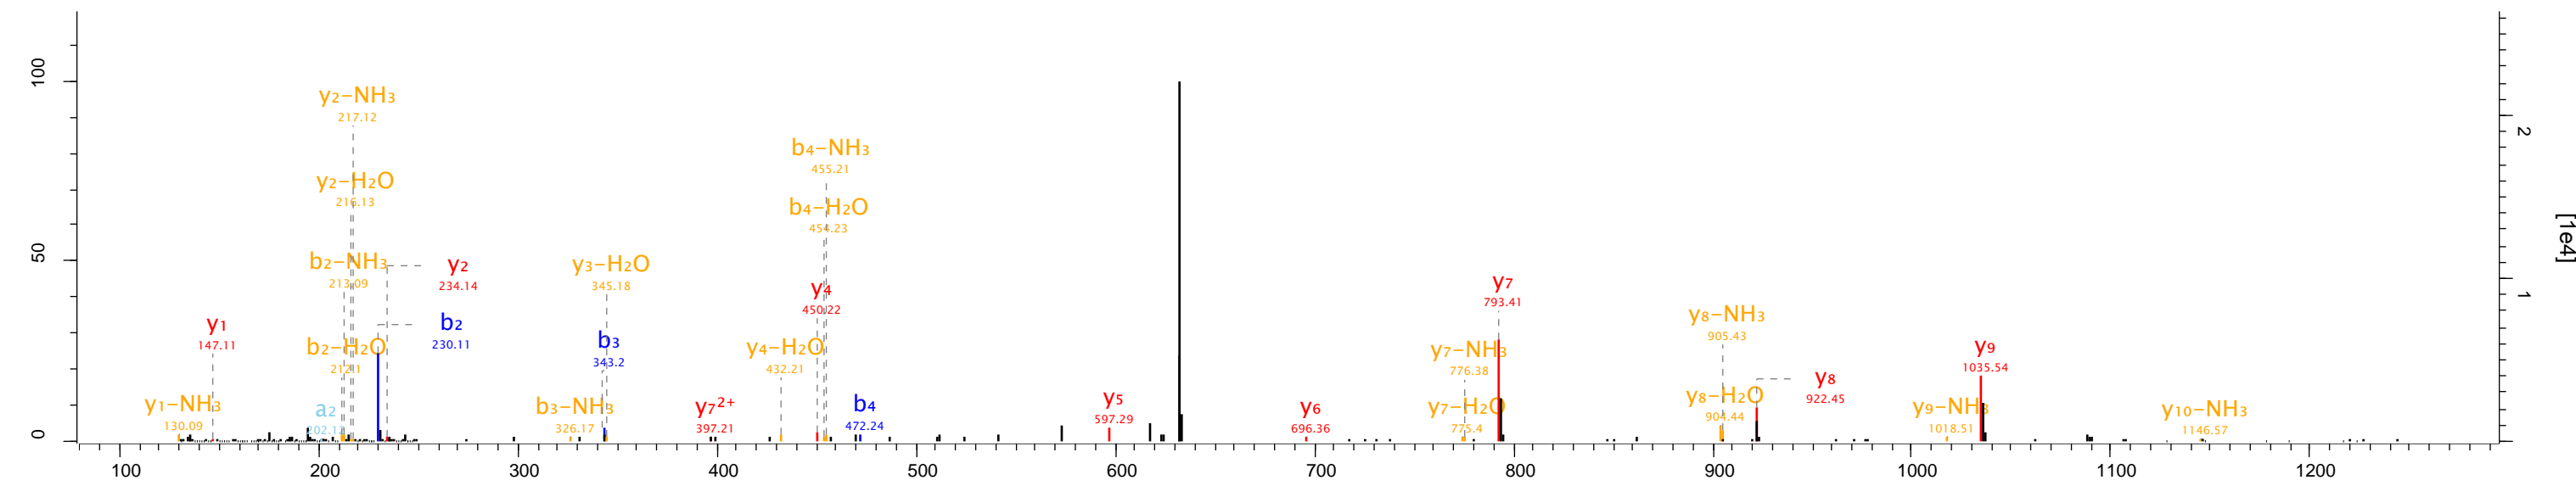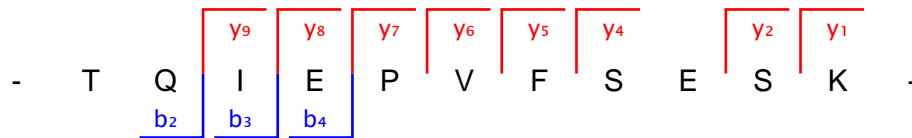

Spectral Annotation for Single-Peptide IDs in 16-cell Embryo using Q-OT-LIT

Raw file 2015-01-05\_CL03\_XenEmb\_x2 Scan 32913 Method ITMS; HCD Score 69.77 m/z 868.08

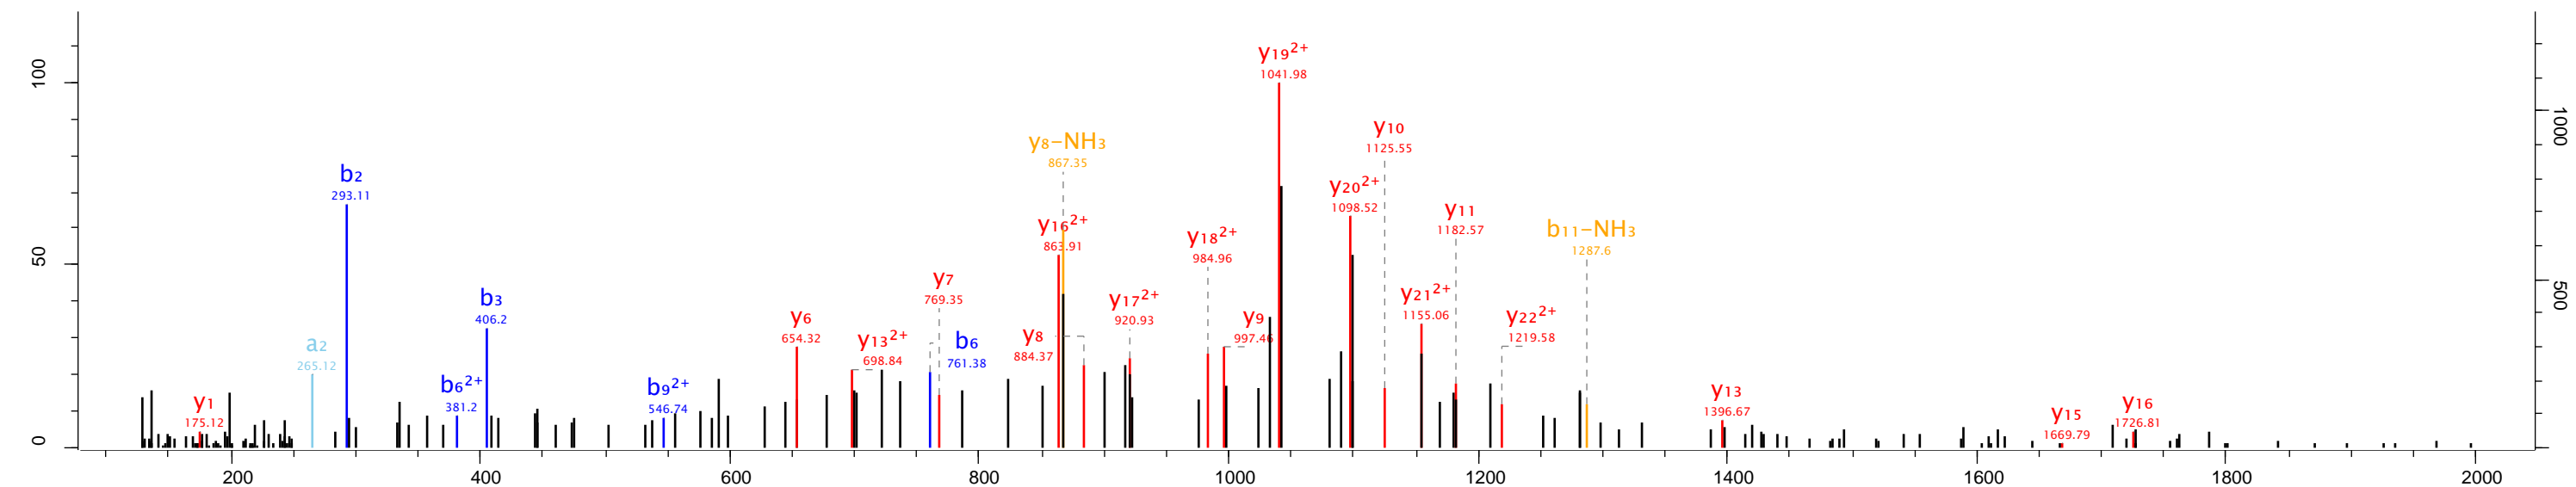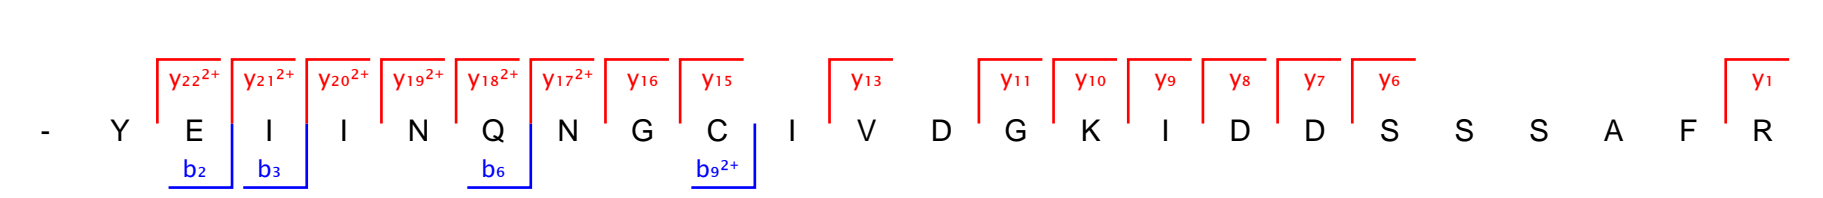

Raw file: 2015-01-05\_CL03\_XenEmb\_x2  
 Scan: 32918 Method: ITMS; HCD Score: 64.22 m/z: 664.82

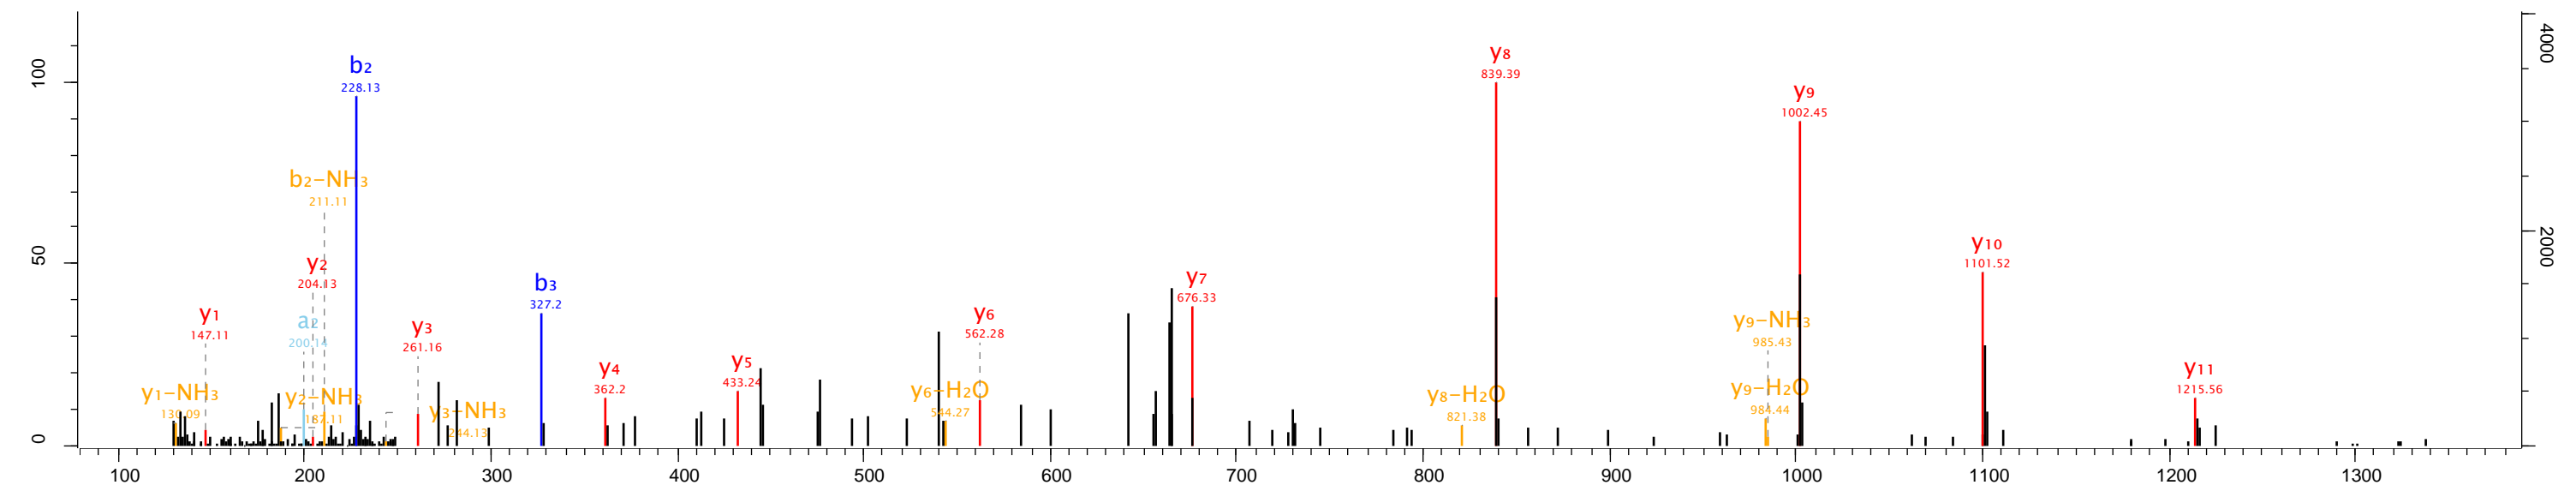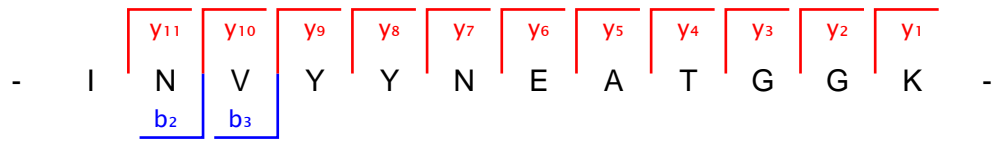

Raw file: 2015-01-05\_CL03\_XenEmb\_x2  
 Scan: 32919 Method: ITMS; HCD Score: 96.33 m/z: 632.82

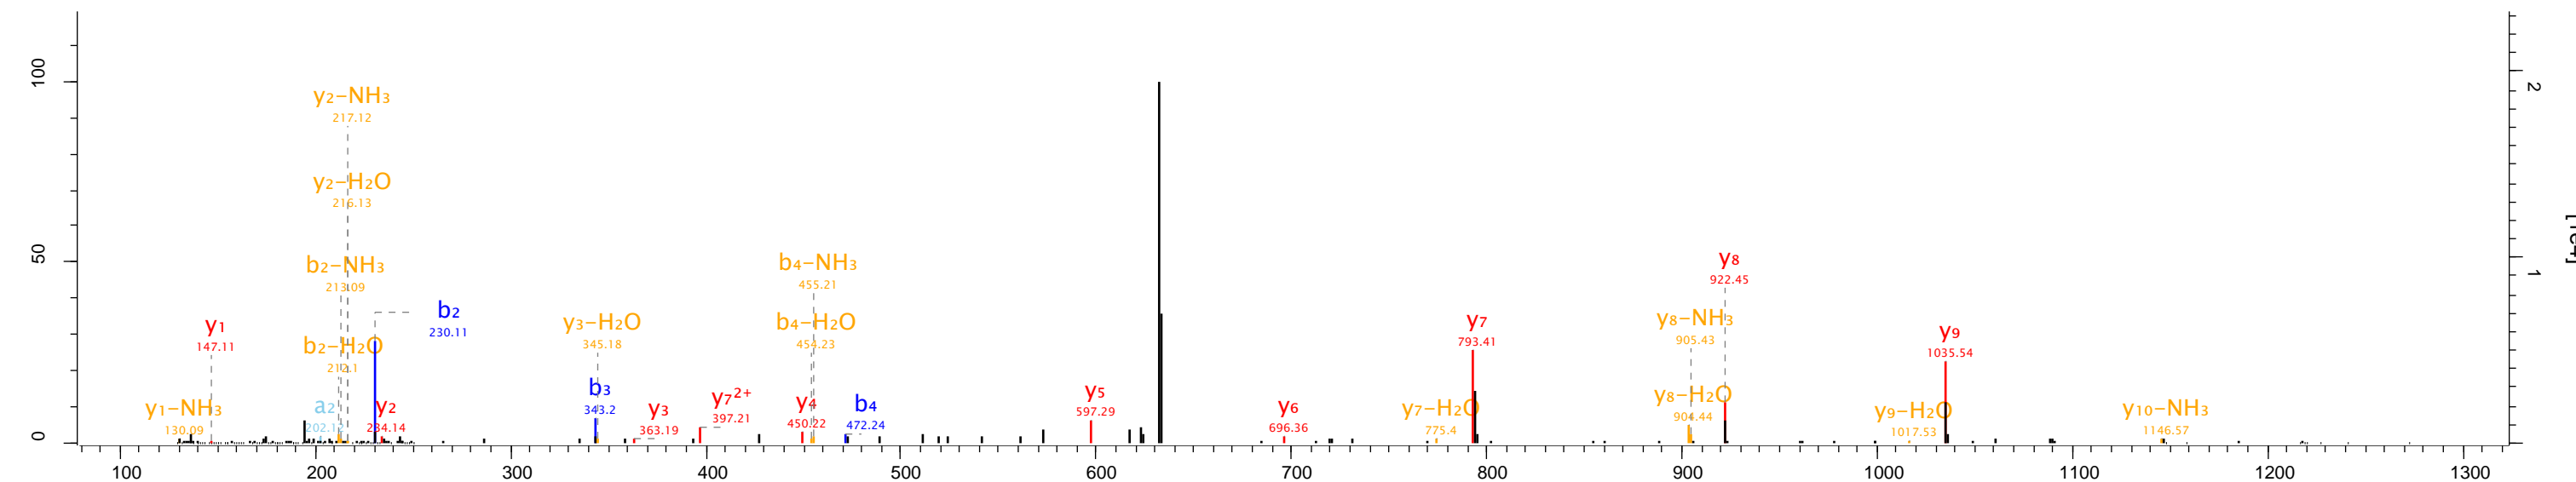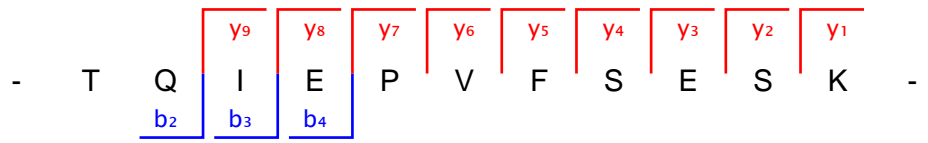

Spectral Annotation for Single-Peptide IDs in 16-cell Embryo using Q-OT-LIT

Raw file: 2015-01-05\_CL03\_XenEmb\_x2  
 Scan: 32934 Method: ITMS; HCD Score: 48.35 m/z: 868.08

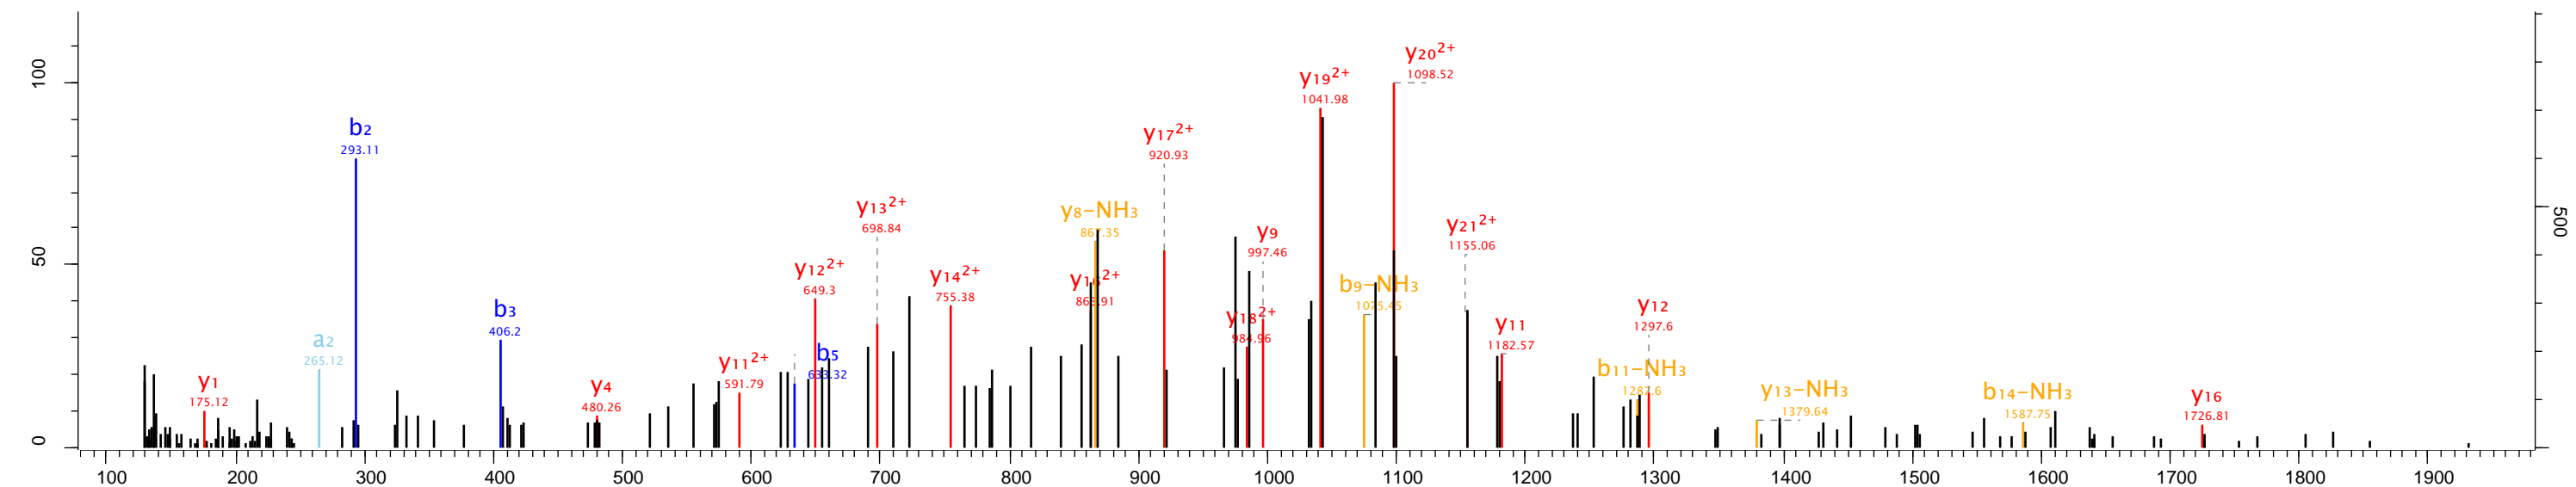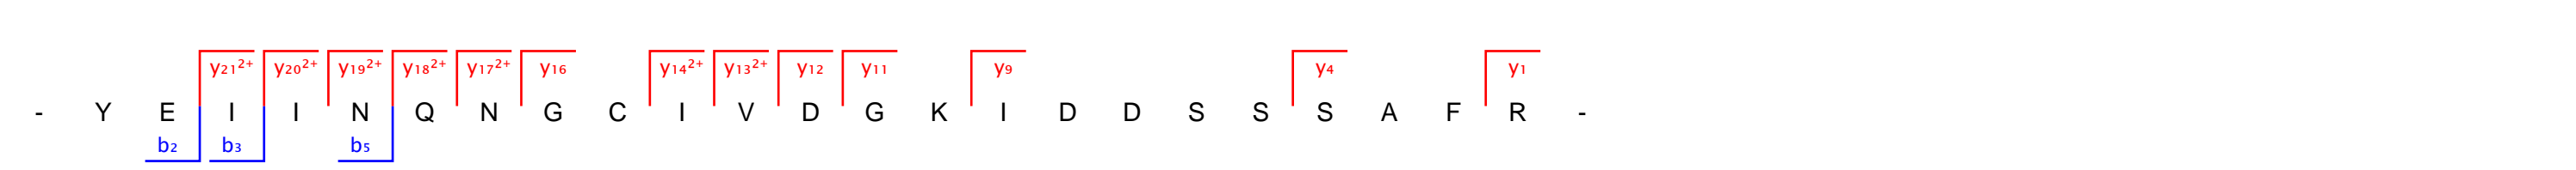

Raw file 2015-01-05\_CL03\_XenEmb\_x2 Scan 32941 Method ITMS; HCD Score 130.1 m/z 632.82

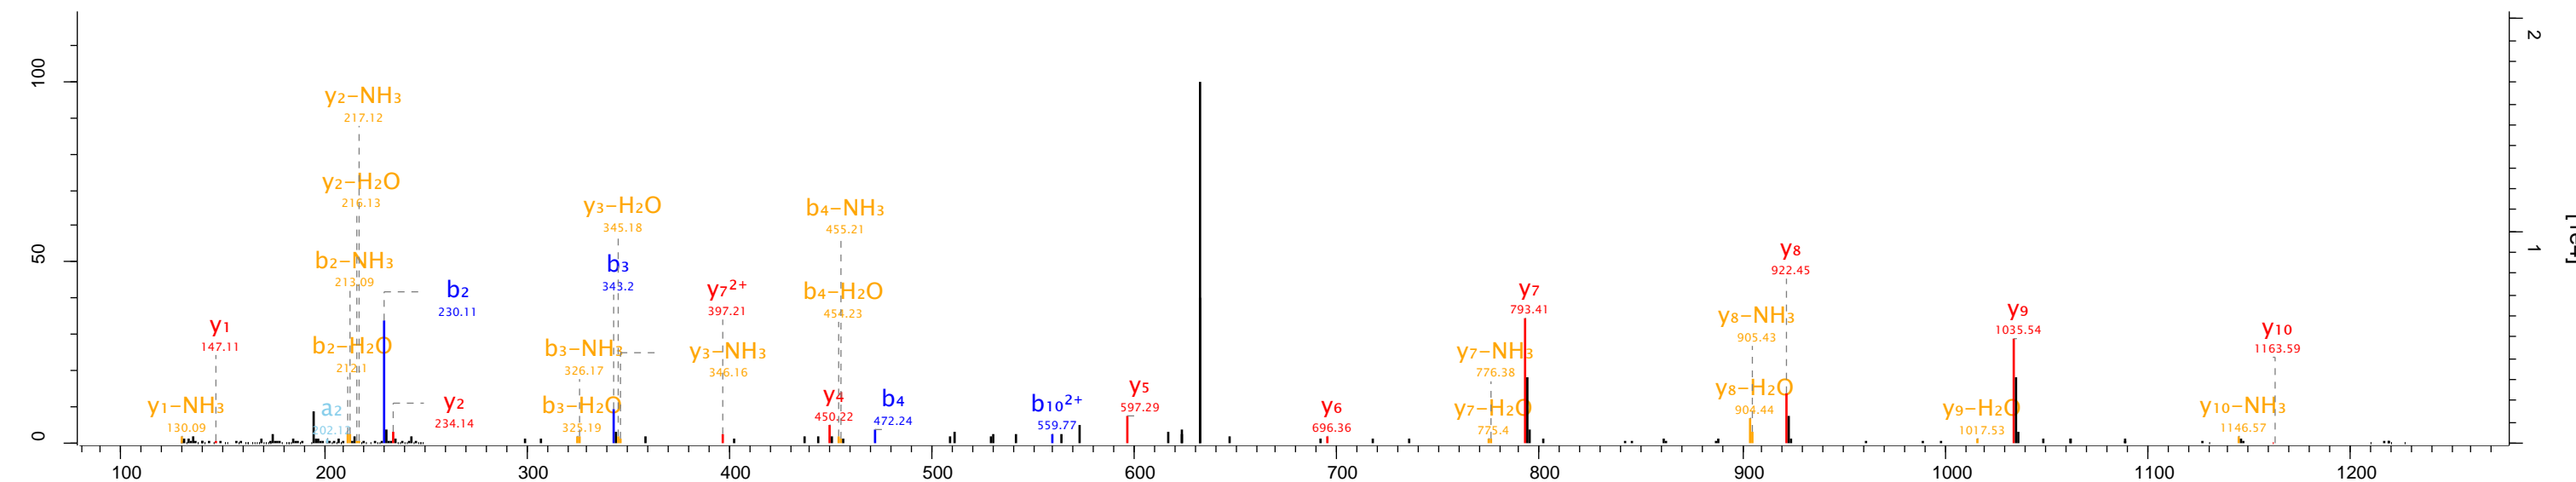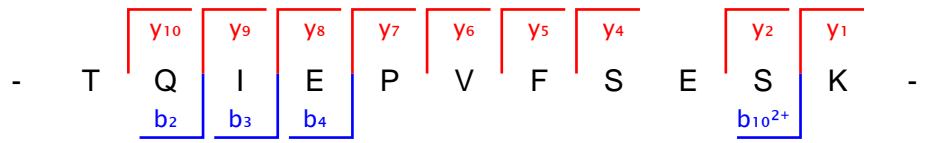

Spectral Annotation for Single-Peptide IDs in 16-cell Embryo using Q-OT-LIT

Raw file: 2015-01-05\_CL03\_XenEmb\_x2  
 Scan: 33114 Method: ITMS; HCD Score: 34.25 m/z: 878.44

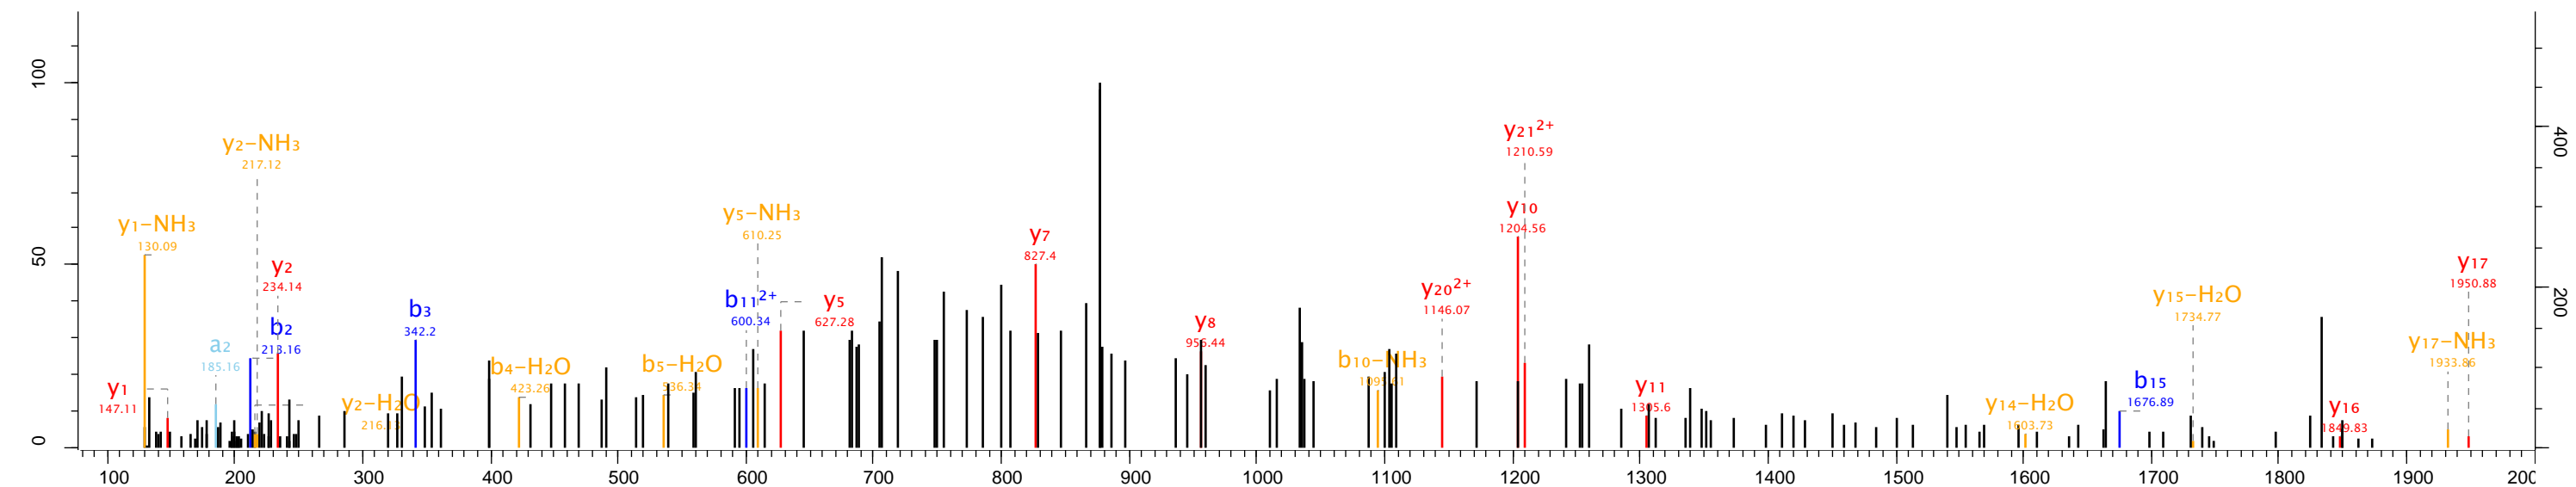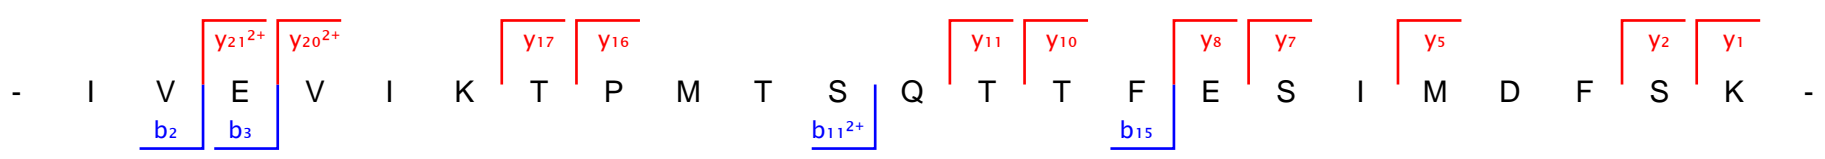

Spectral Annotation for Single-Peptide IDs in 16-cell Embryo using Q-OT-LIT



Raw file 2015-01-05\_CL03\_XenEmb\_x2  
 Scan 33129 Method ITMS; HCD Score 75.06 m/z 877.77

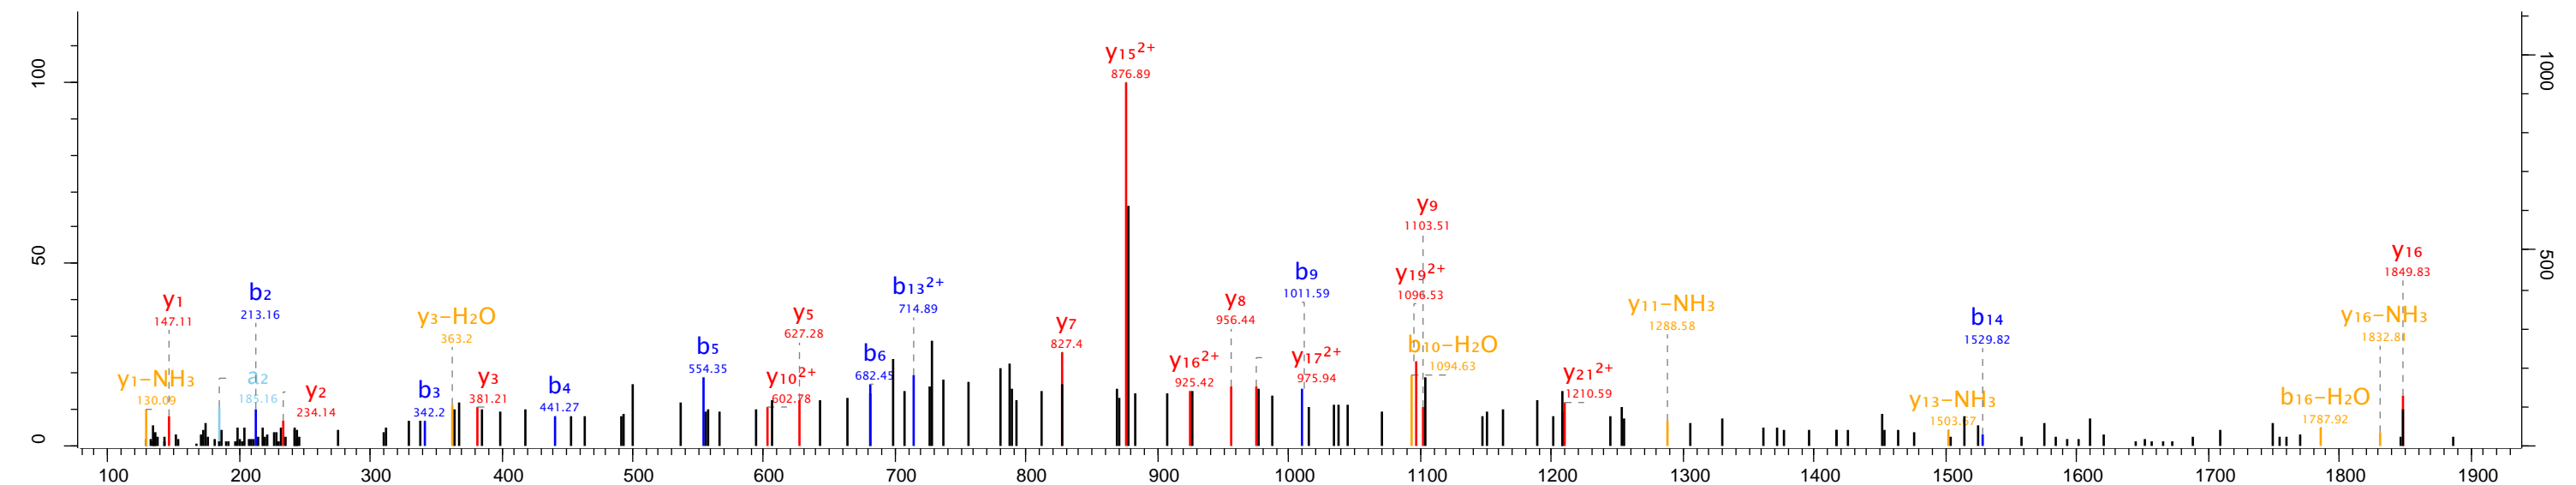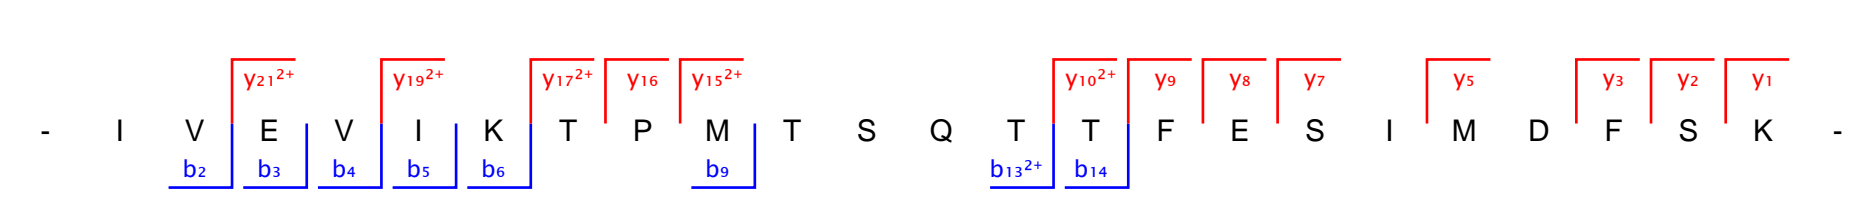

Raw file 2015-01-05\_CL03\_XenEmb\_x2 Scan 33178 Method ITMS; HCD Score 37.37 m/z 878.11

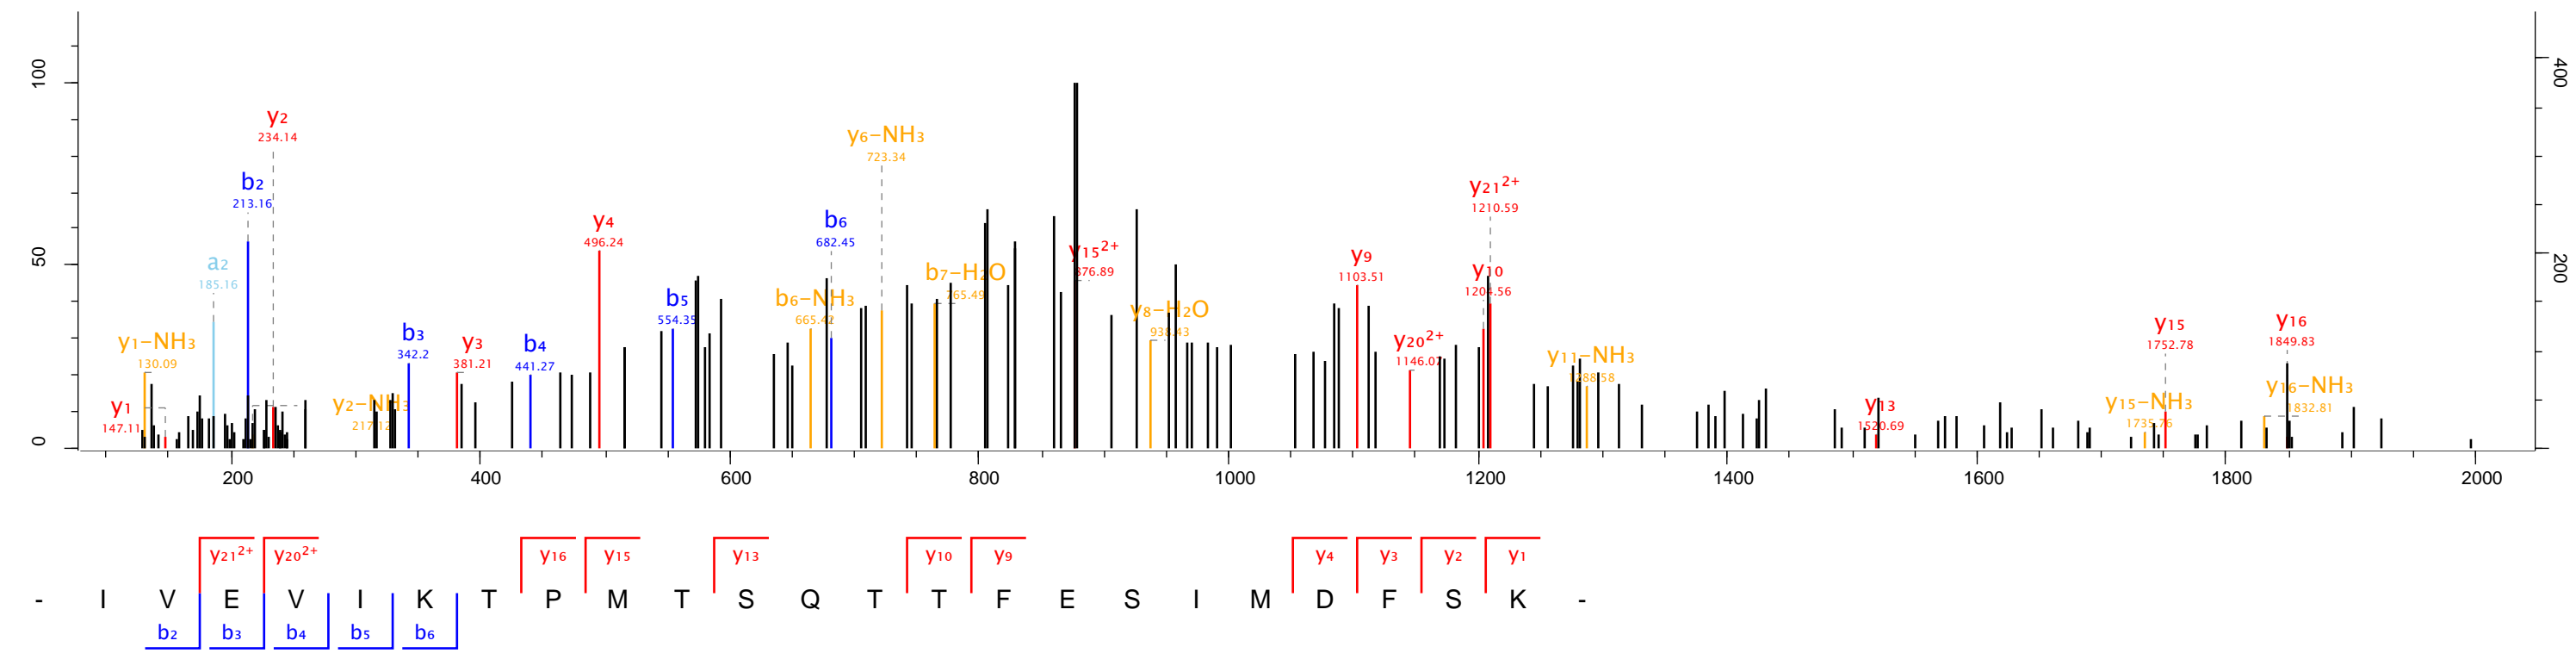

Raw file: 2015-01-05\_CL03\_XenEmb\_x2  
 Scan: 33292 Method: ITMS; HCD Score: 52.16 m/z: 933.45

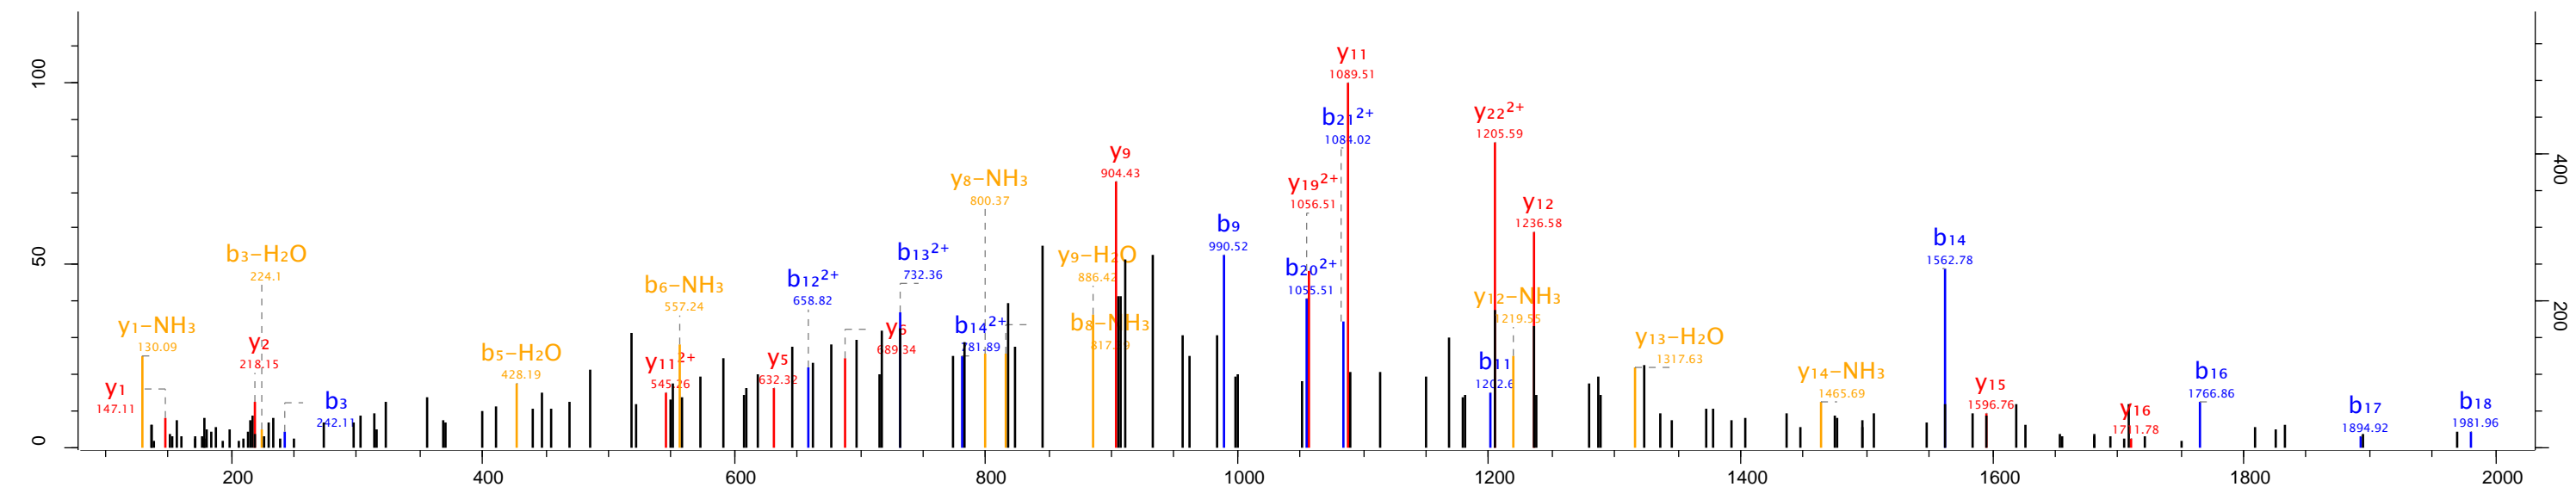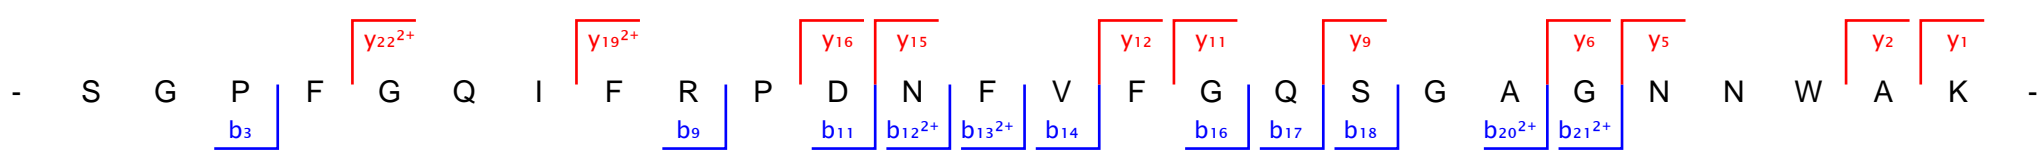

Spectral Annotation for Single-Peptide IDs in 16-cell Embryo using Q-OT-LIT

Raw file 2015-01-05\_CL03\_XenEmb\_x2 Scan 33322 Method ITMS; HCD Score 117.27 m/z 660.35

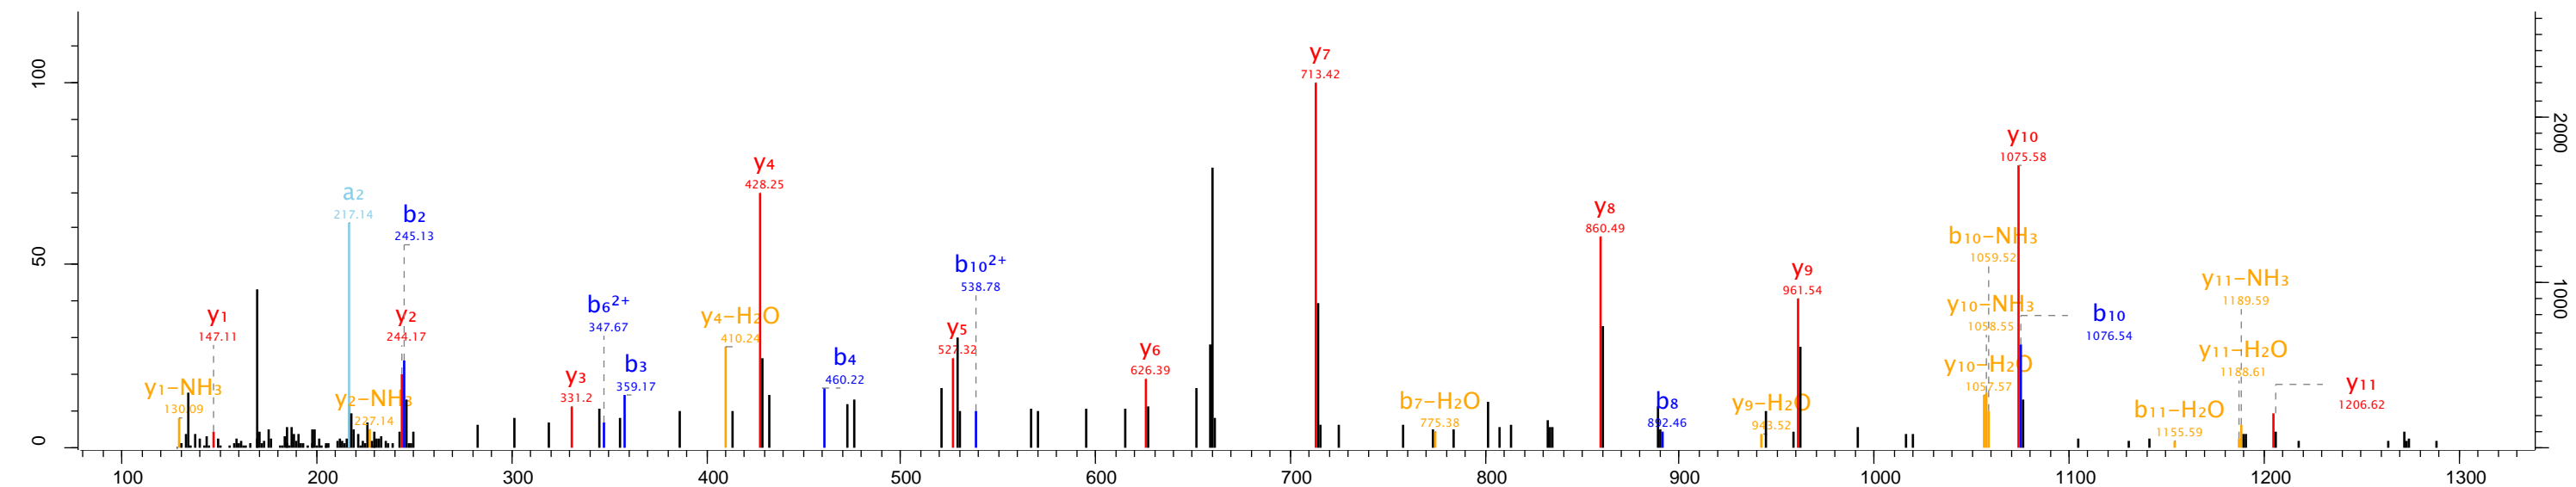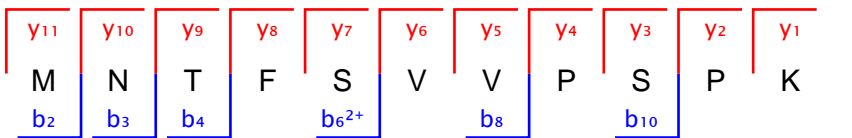

Spectral Annotation for Single-Peptide IDs in 16-cell Embryo using Q-OT-LIT

Raw file 2015-01-05\_CL03\_XenEmb\_x2 Scan 33347 Method ITMS; HCD Score 118.87 m/z 660.35

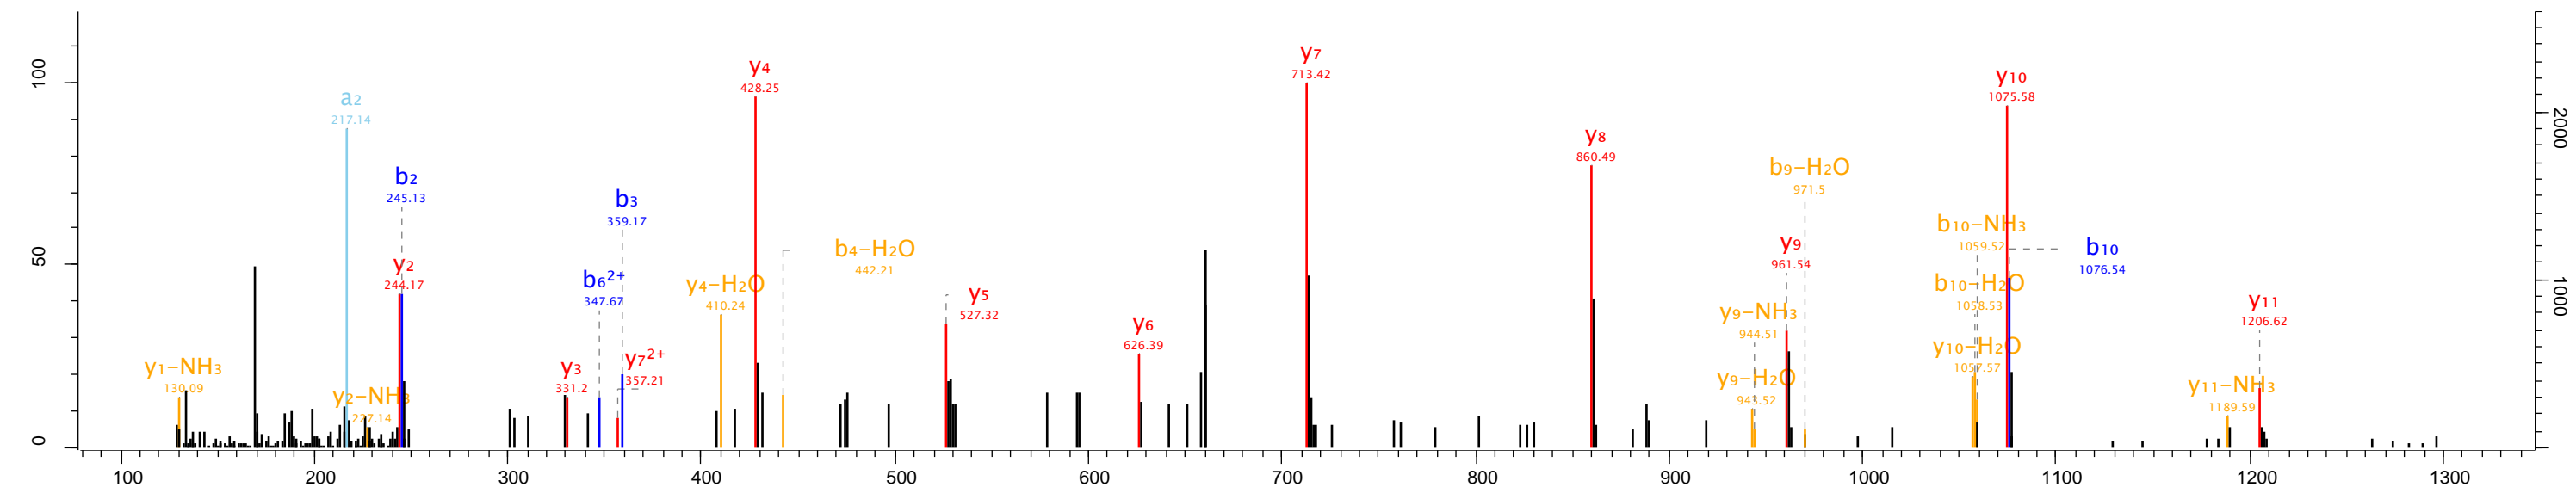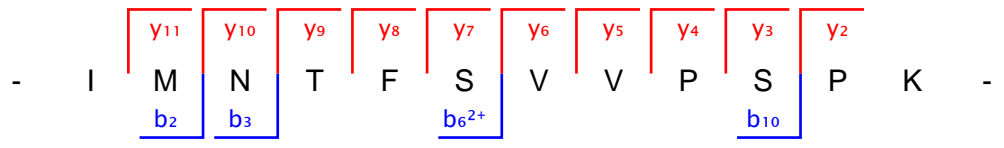

Spectral Annotation for Single-Peptide IDs in 16-cell Embryo using Q-OT-LIT

Raw file: 2015-01-05\_CL03\_XenEmb\_x2  
 Scan: 33363 Method: ITMS; HCD Score: 113.24 m/z: 660.35

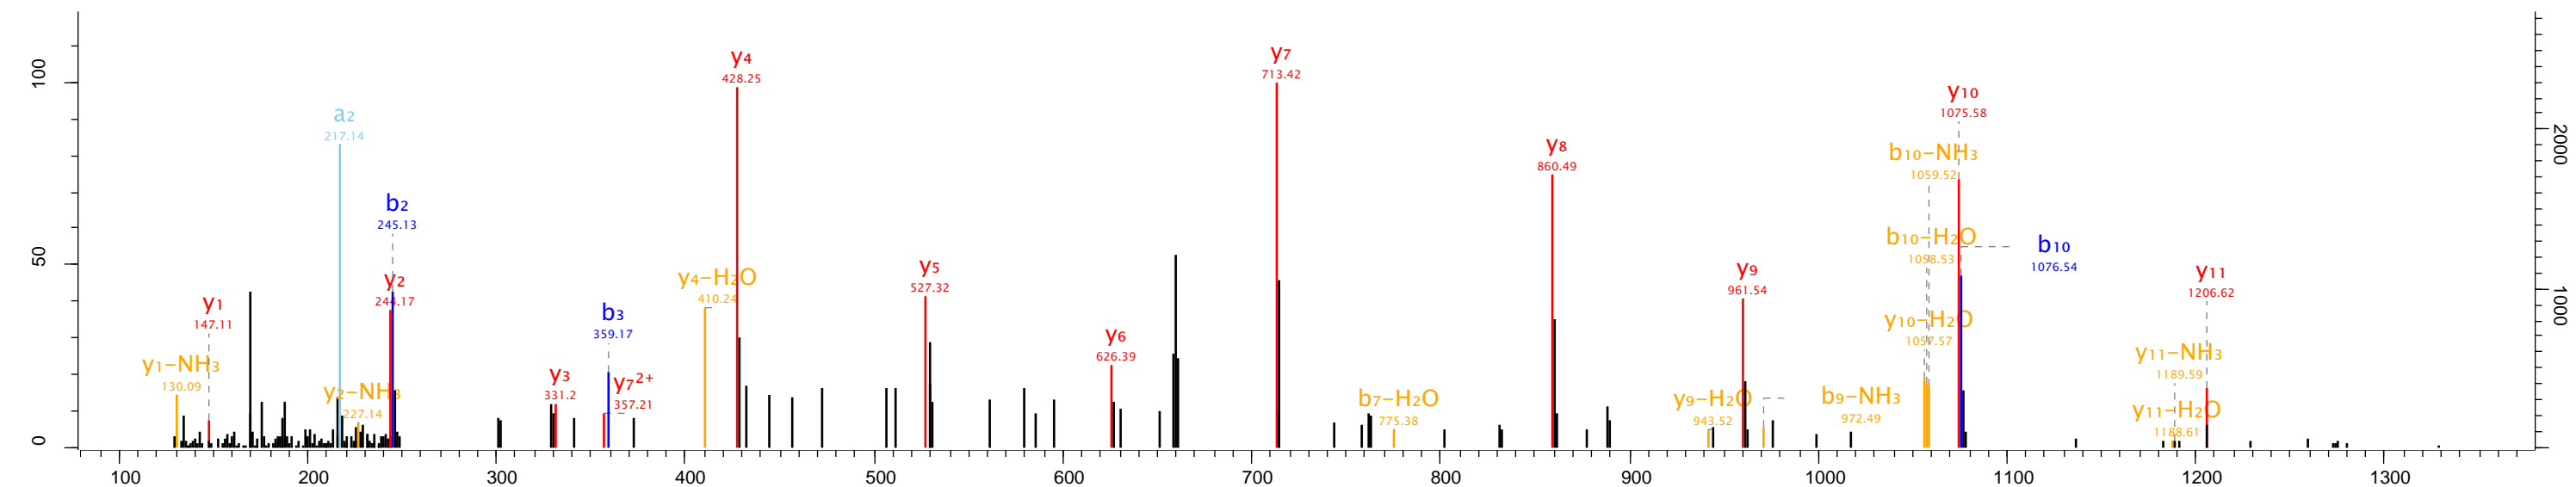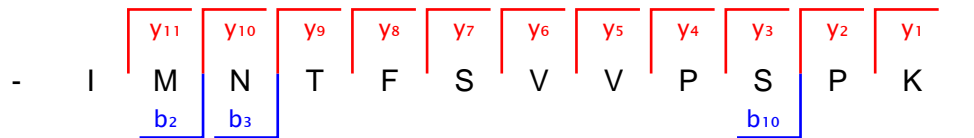

Spectral Annotation for Single-Peptide IDs in 16-cell Embryo using Q-OT-LIT

Raw file 2015-01-05\_CL03\_XenEmb\_x2 Scan 33410 Method ITMS; HCD Score 103.03 m/z 840.13

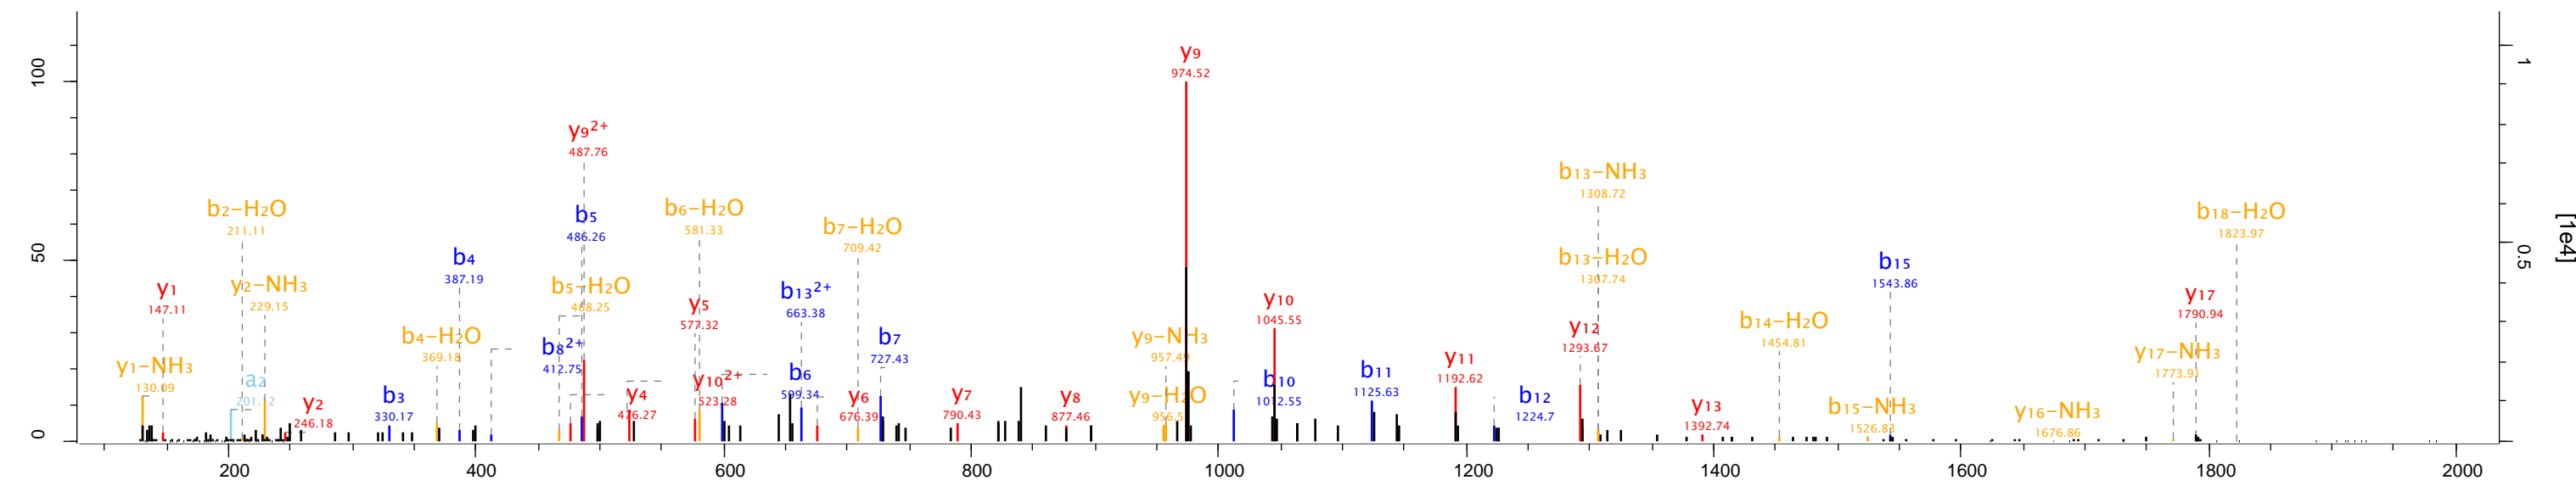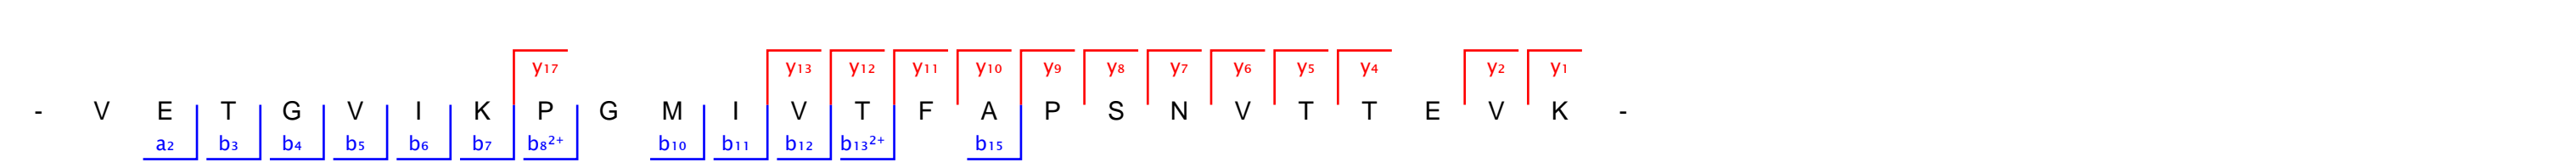

Raw file 2015-01-05\_CL03\_XenEmb\_x2 Scan 33475 Method ITMS; HCD Score 120.59 m/z 672.86

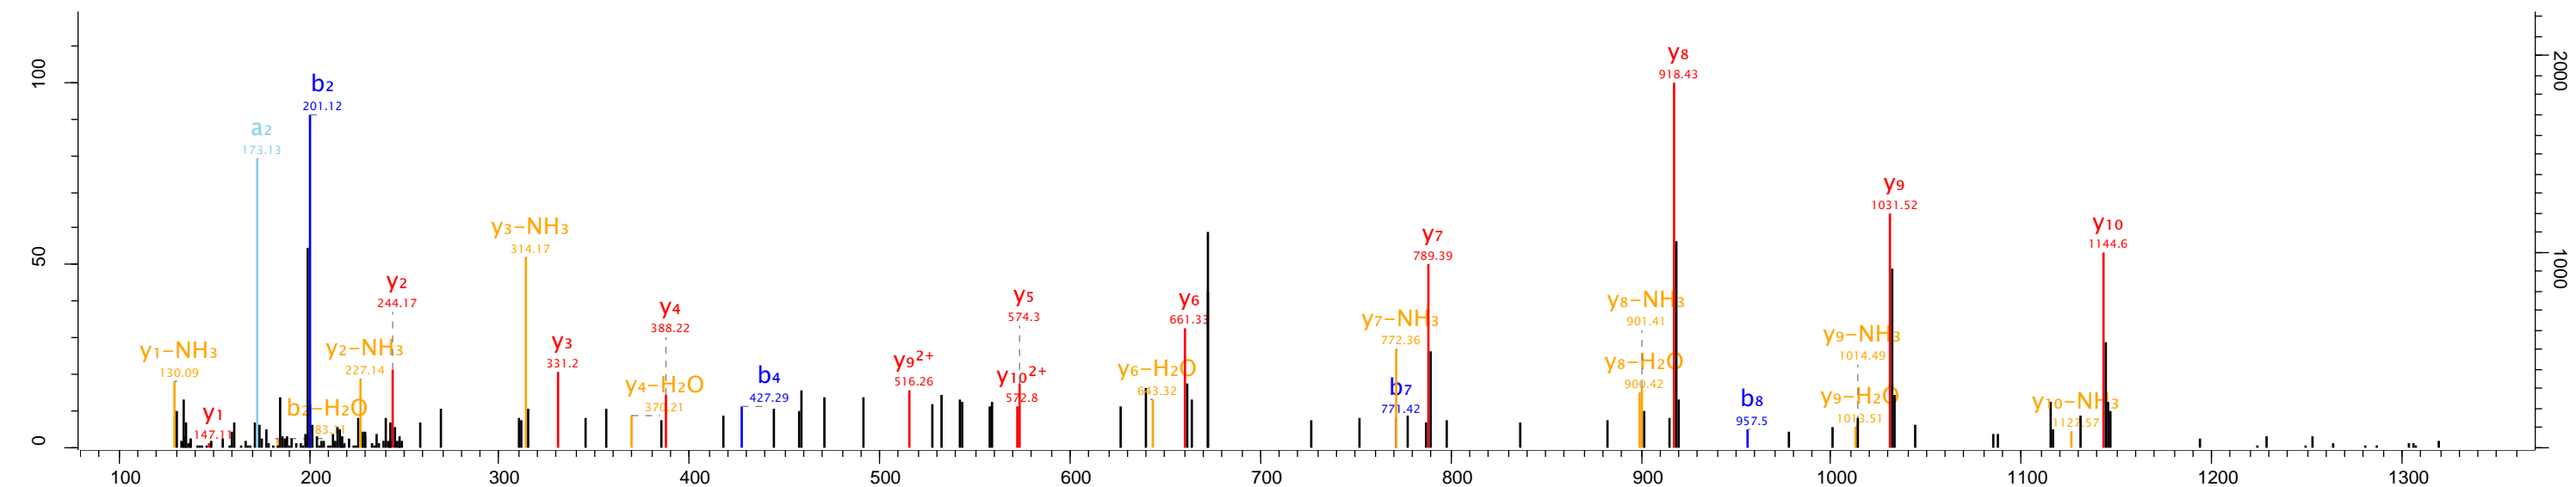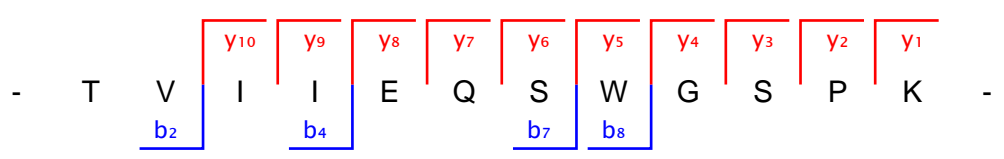



Raw file: 2015-01-05\_CL03\_XenEmb\_x2  
 Scan: 33477  
 Method: ITMS; HCD  
 Score: 138.44  
 m/z: 840.12

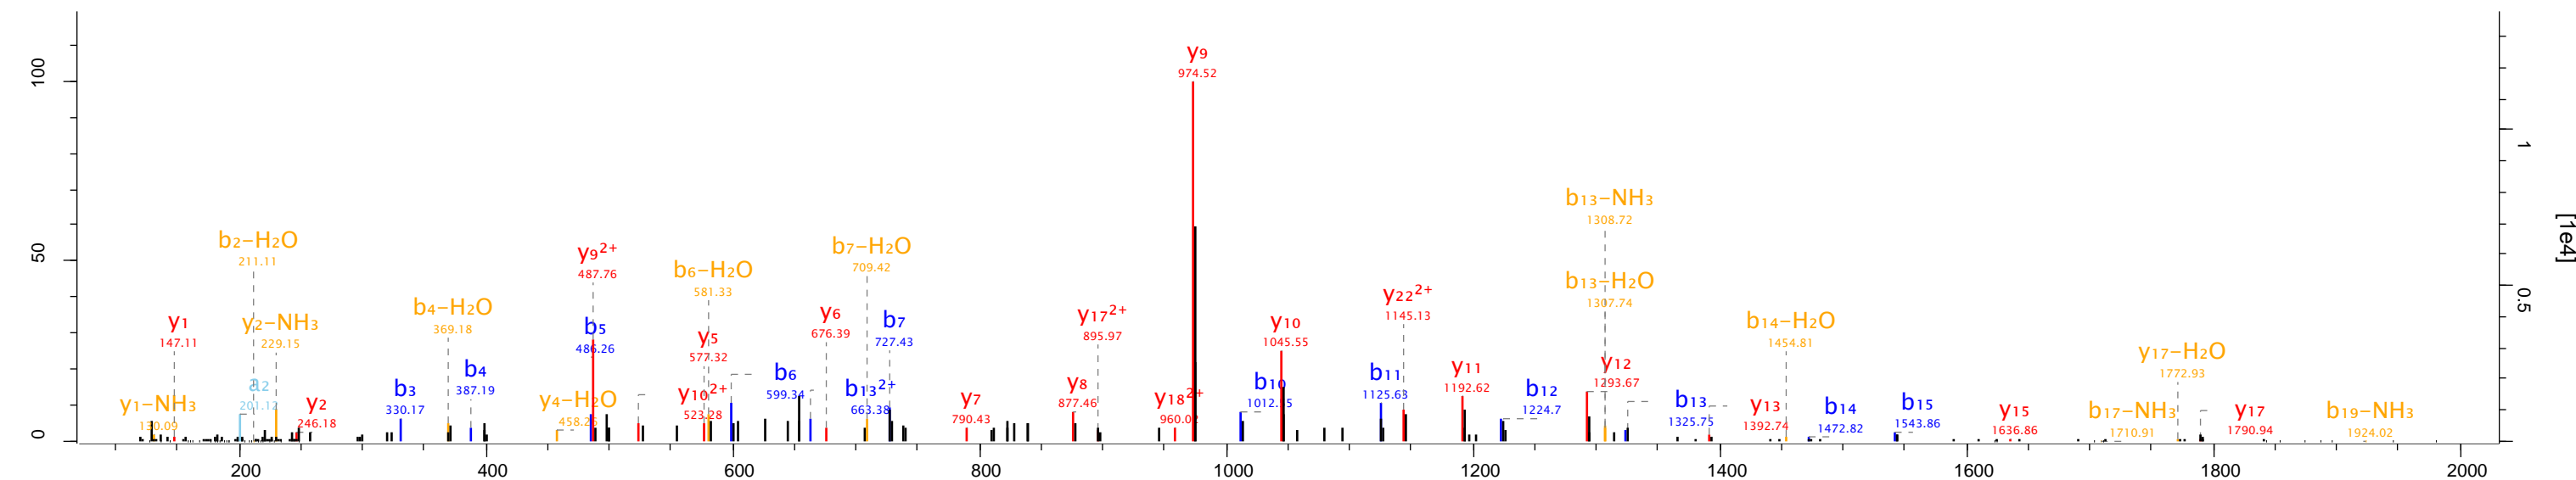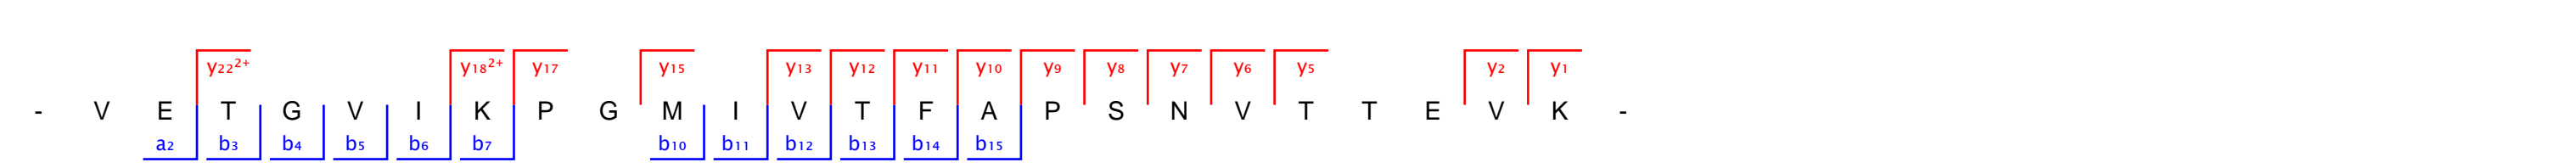

Spectral Annotation for Single-Peptide IDs in 16-cell Embryo using Q-OT-LIT

Raw file 2015-01-05\_CL03\_XenEmb\_x2 Scan 33495 Method ITMS; HCD Score 102.73 m/z 672.86

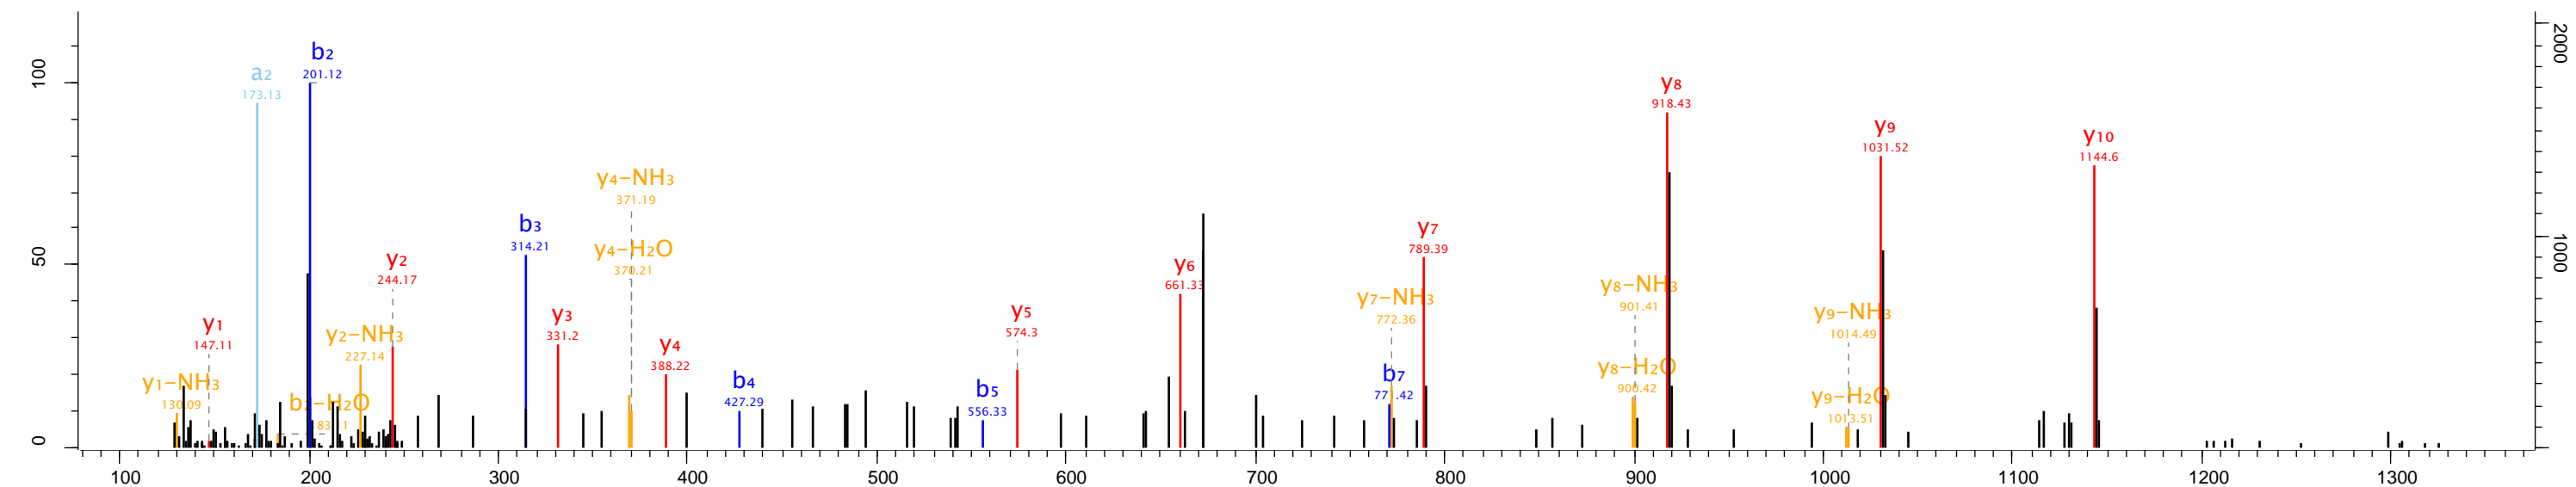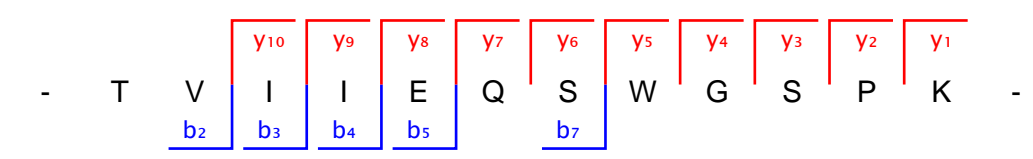

Raw file 2015-01-05\_CL03\_XenEmb\_x2 Scan 33496 Method ITMS; HCD Score 128.09 m/z 840.13

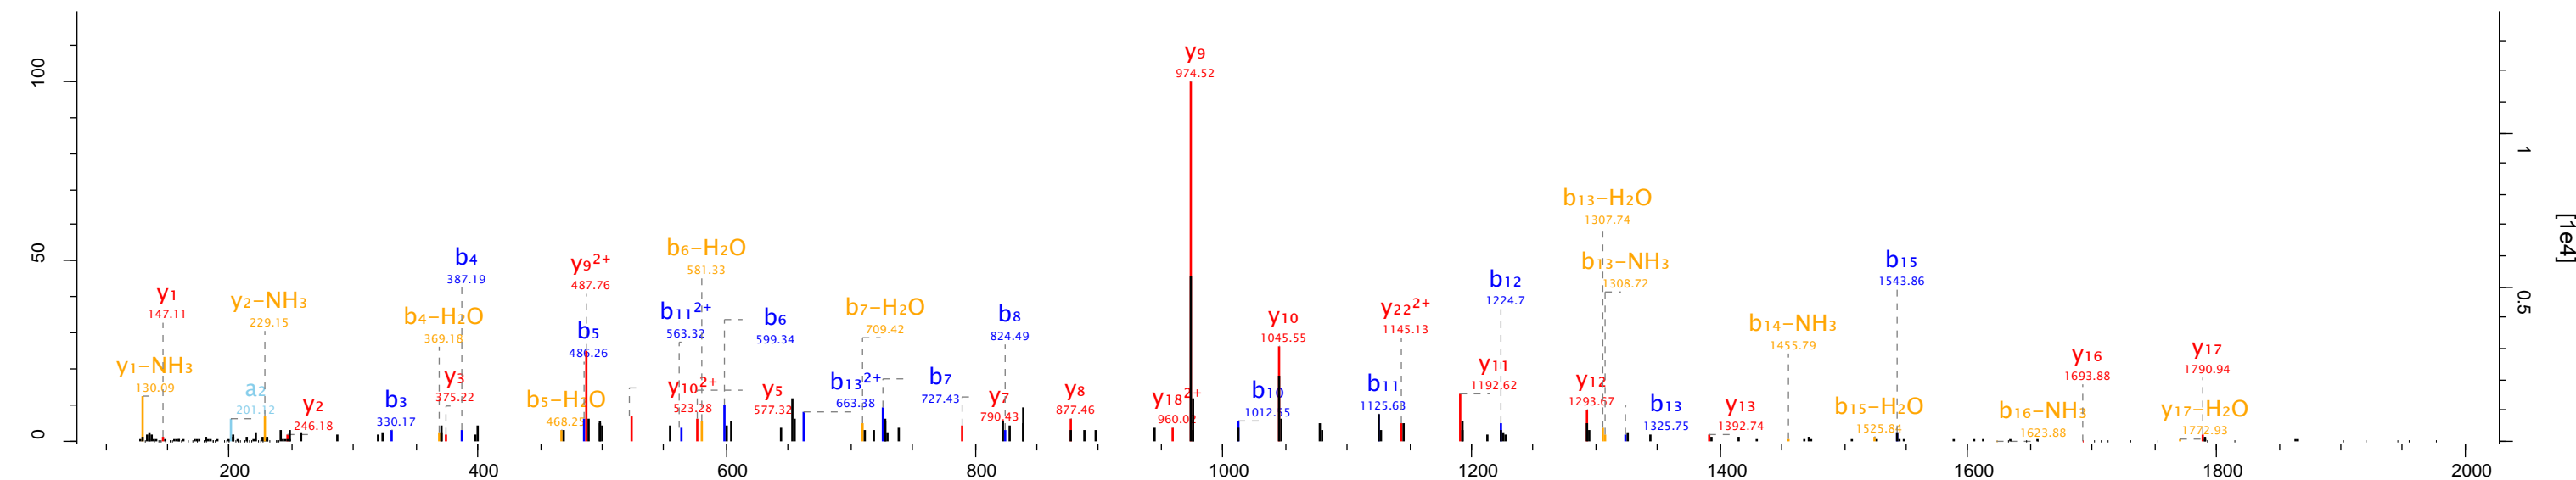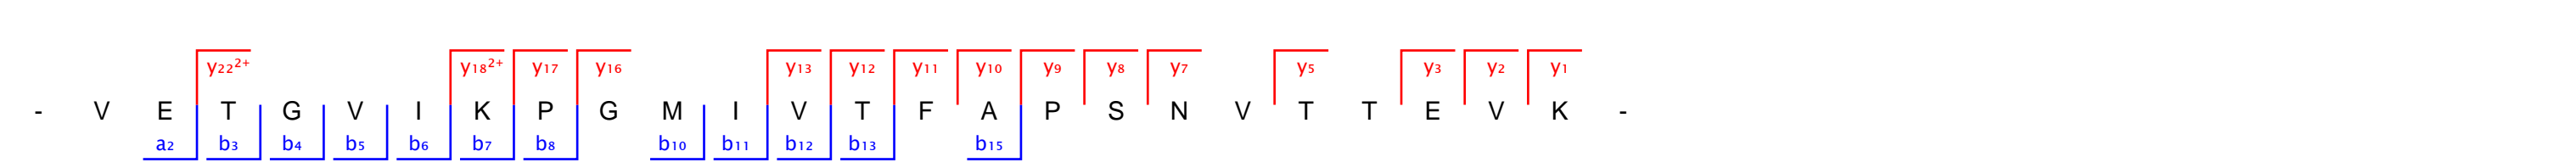

Raw file 2015-01-05\_CL03\_XenEmb\_x2 Scan 33510 Method ITMS; HCD Score 109.91 m/z 840.12

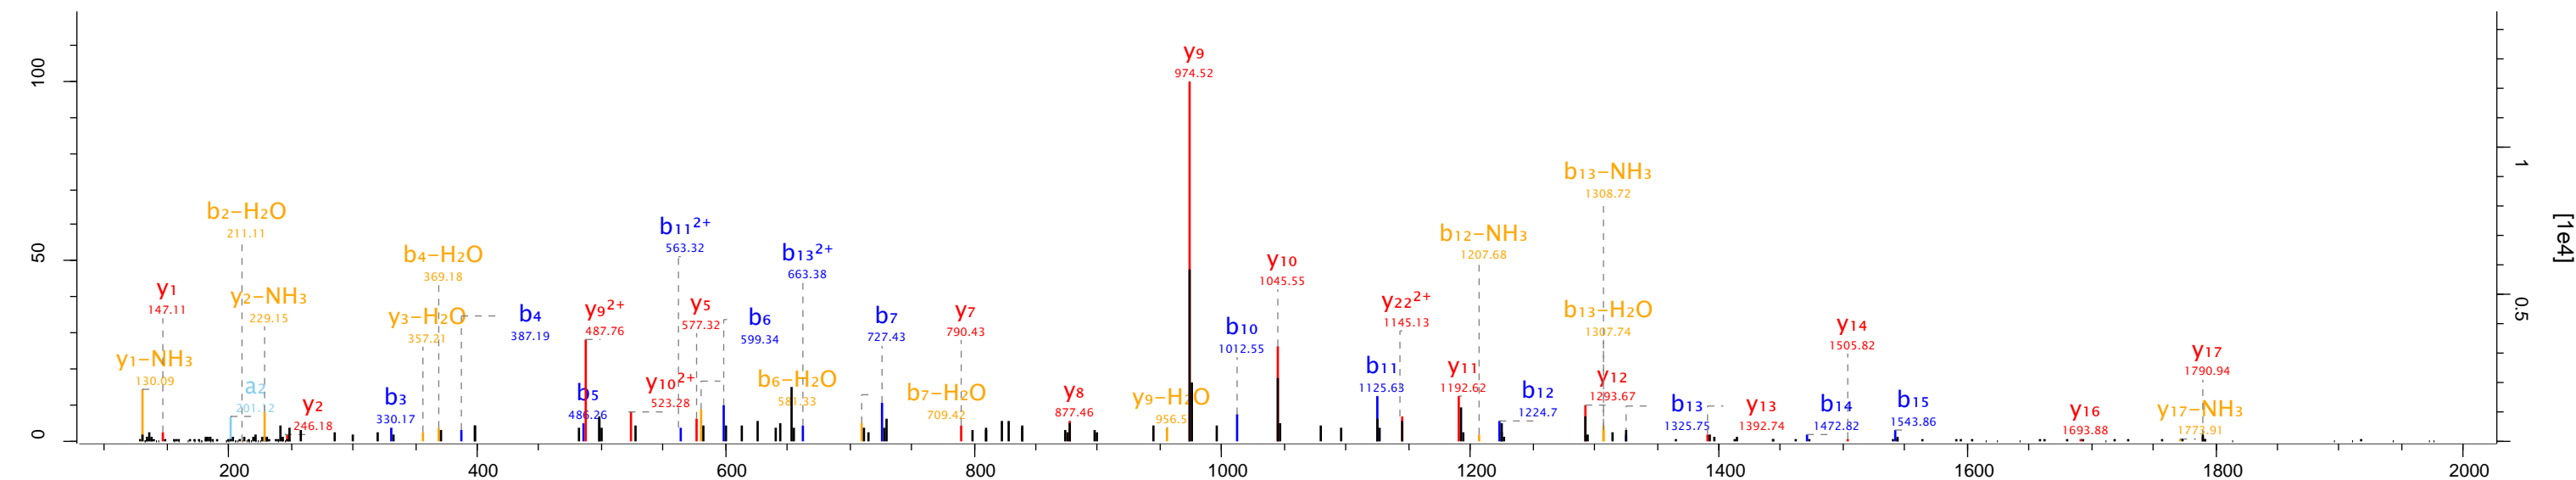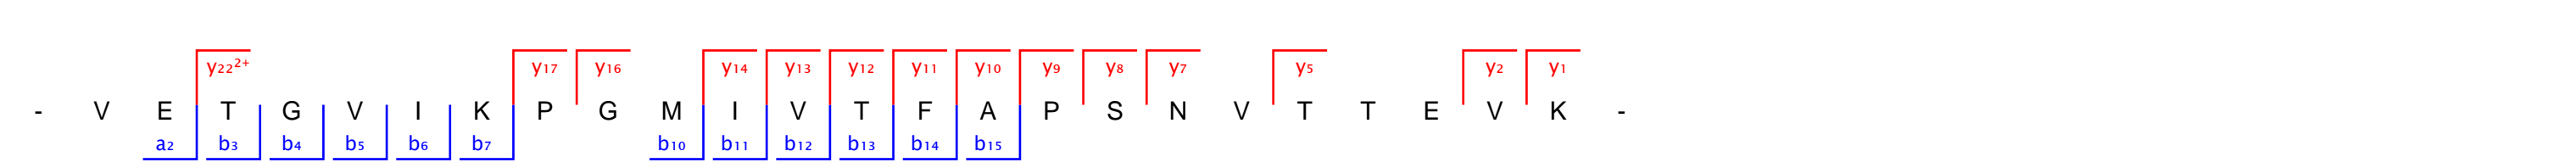

Spectral Annotation for Single-Peptide IDs in 16-cell Embryo using Q-OT-LIT

Raw file: 2015-01-05\_CL03\_XenEmb\_x2  
 Scan: 33574 Method: ITMS; HCD Score: 88.42 m/z: 933.79

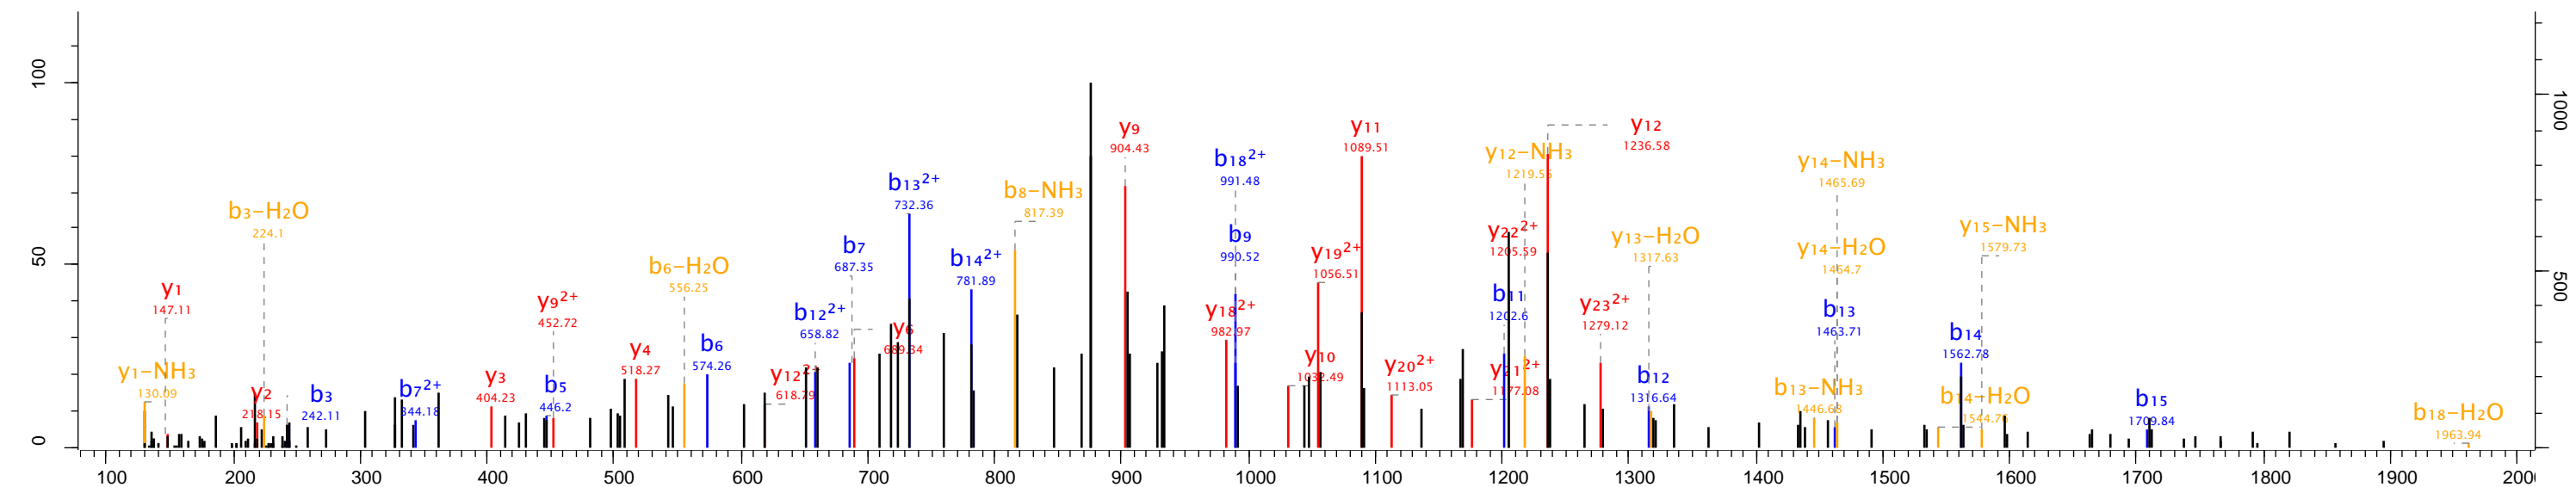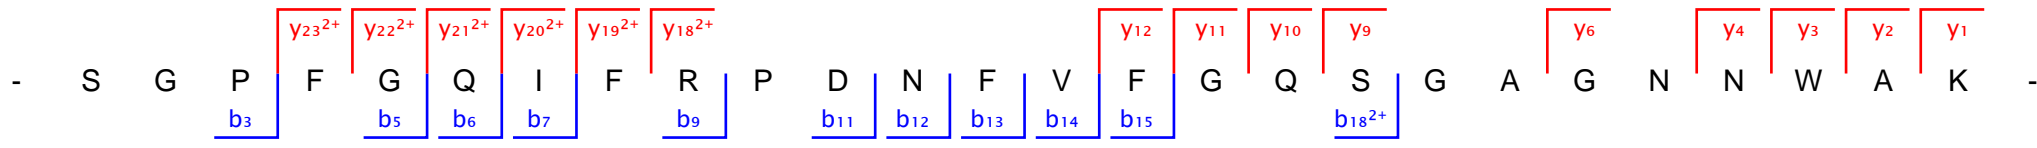

Spectral Annotation for Single-Peptide IDs in 16-cell Embryo using Q-OT-LIT

Raw file 2015-01-05\_CL03\_XenEmb\_x2 Scan 33713 Method ITMS; HCD Score 92.3 m/z 717.83

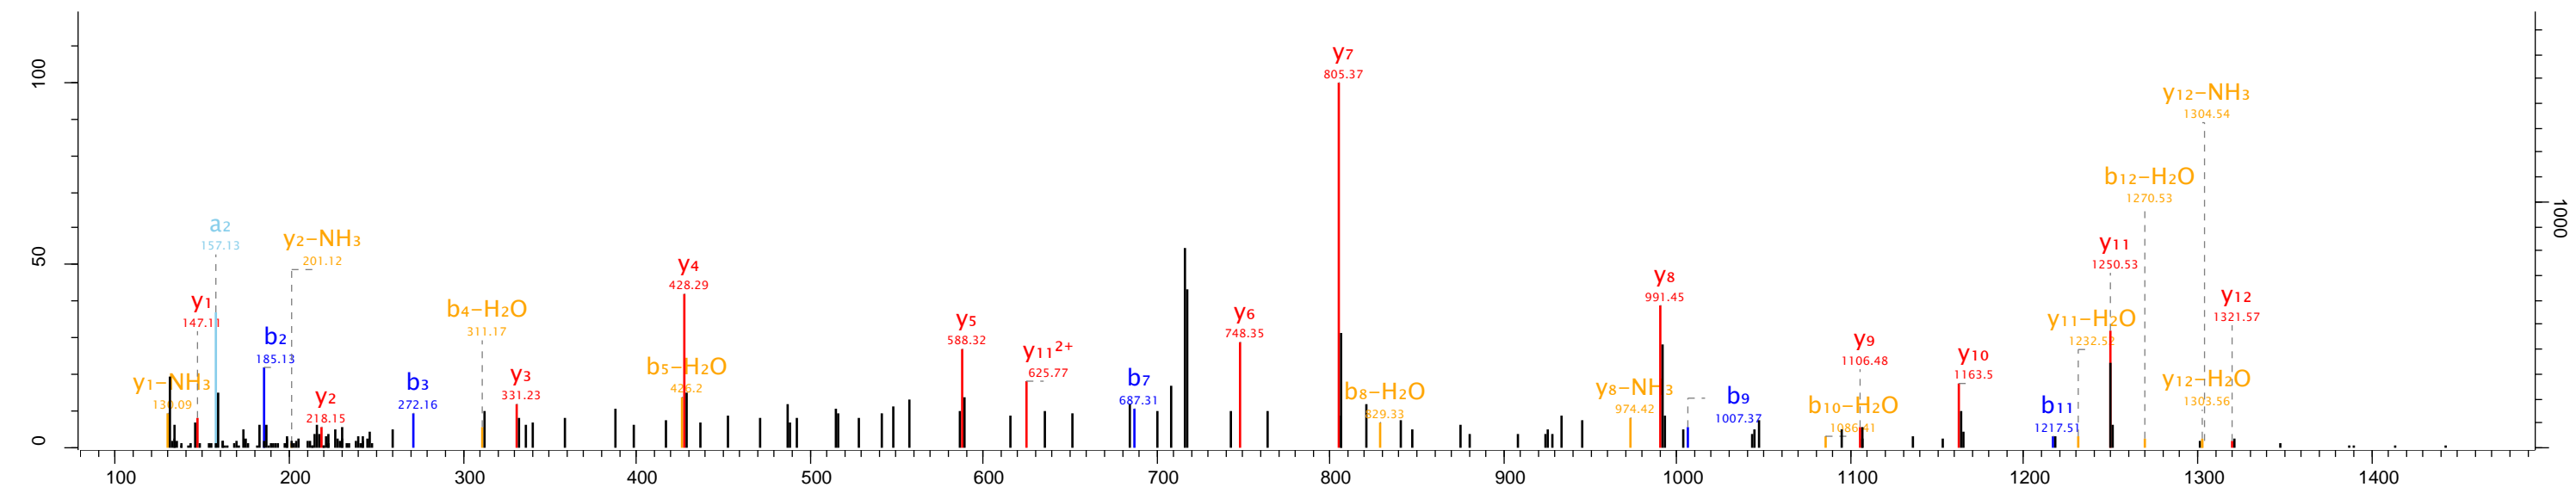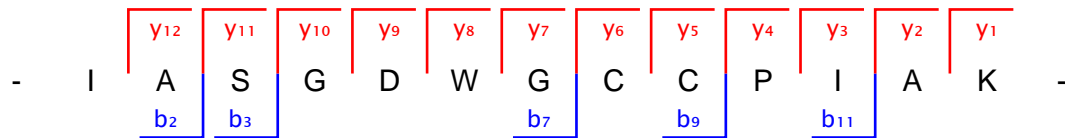

Spectral Annotation for Single-Peptide IDs in 16-cell Embryo using Q-OT-LIT

Raw file 2015-01-05\_CL03\_XenEmb\_x2 Scan 33747 Method ITMS; HCD Score 77.19 m/z 666.85

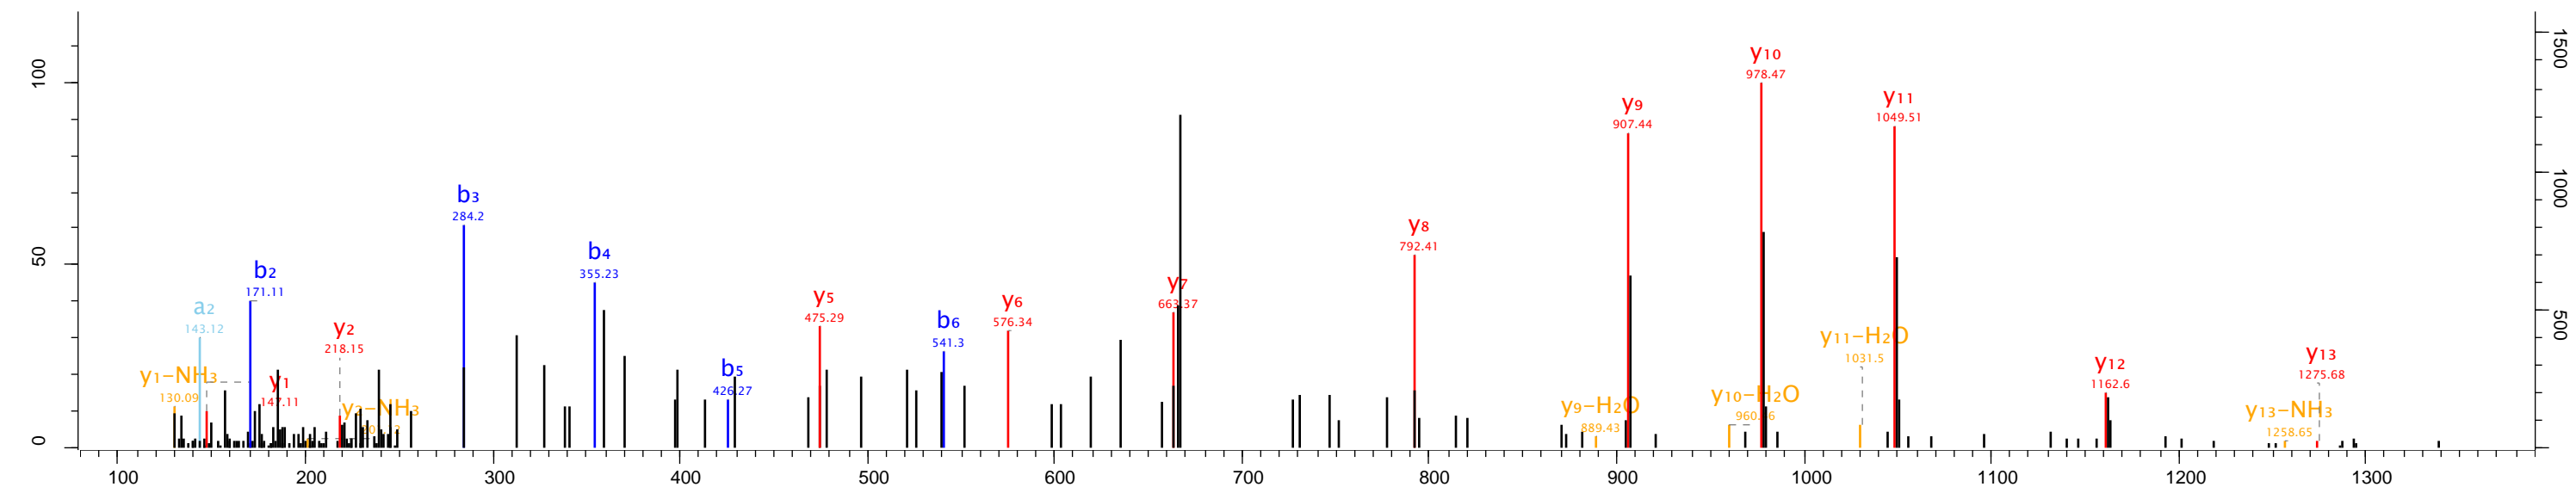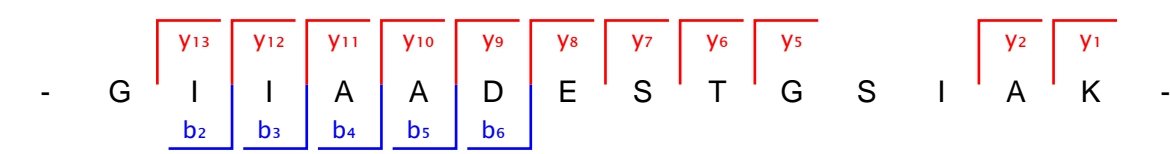

Raw file 2015-01-05\_CL03\_XenEmb\_x2 Scan 33750 Method ITMS; HCD Score 165.35 m/z 717.83

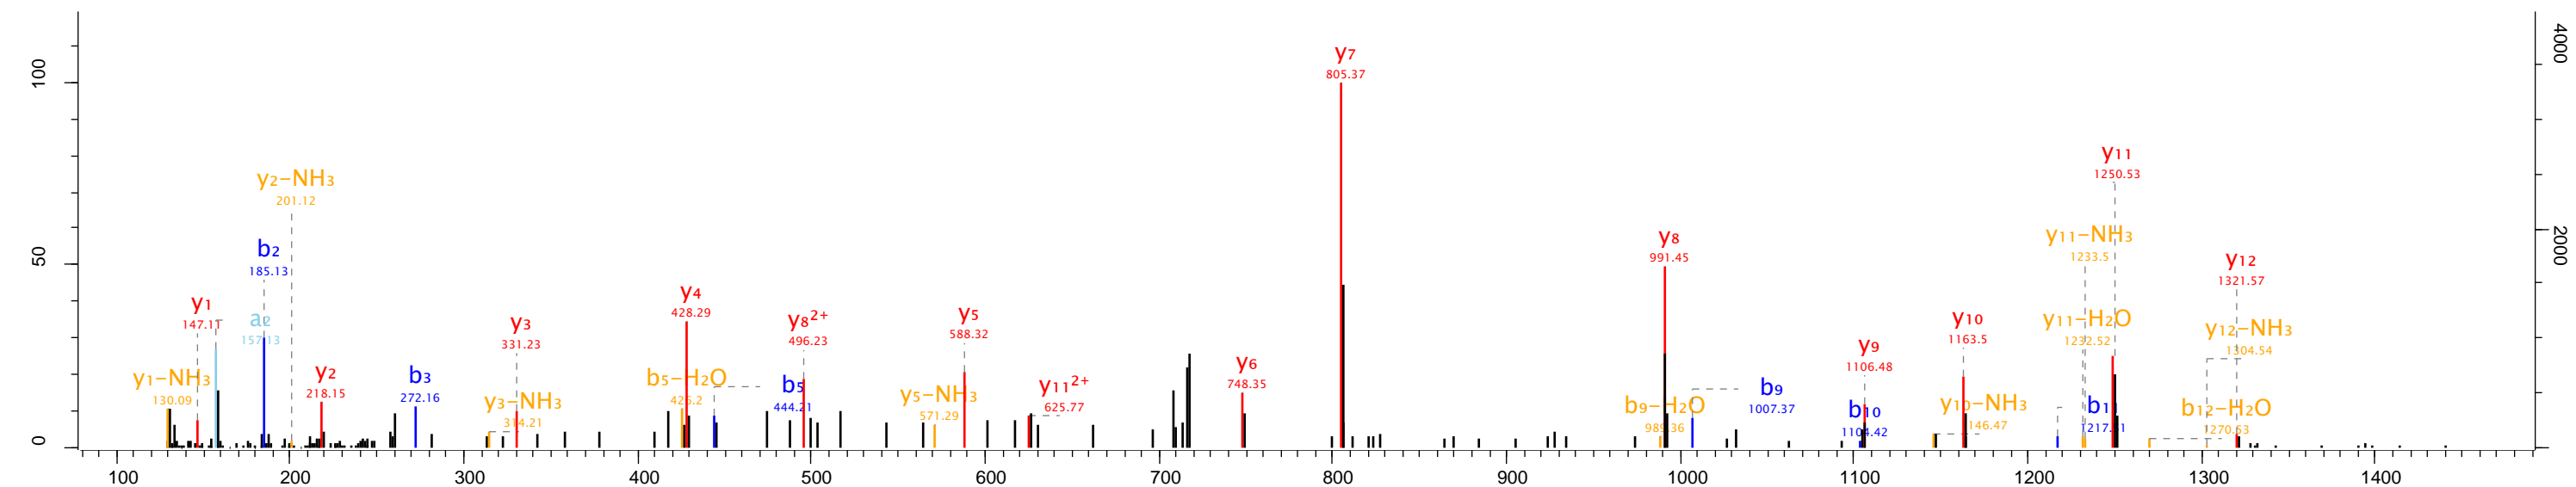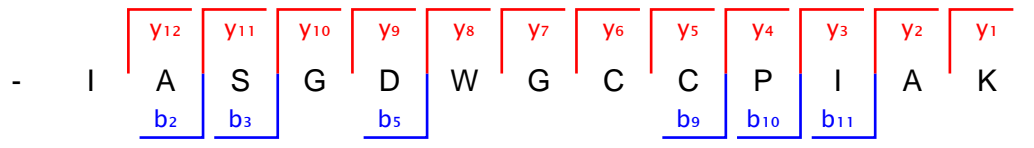



Raw file 2015-01-05\_CL03\_XenEmb\_x2 Scan 33785 Method ITMS; HCD Score 166.24 m/z 717.83

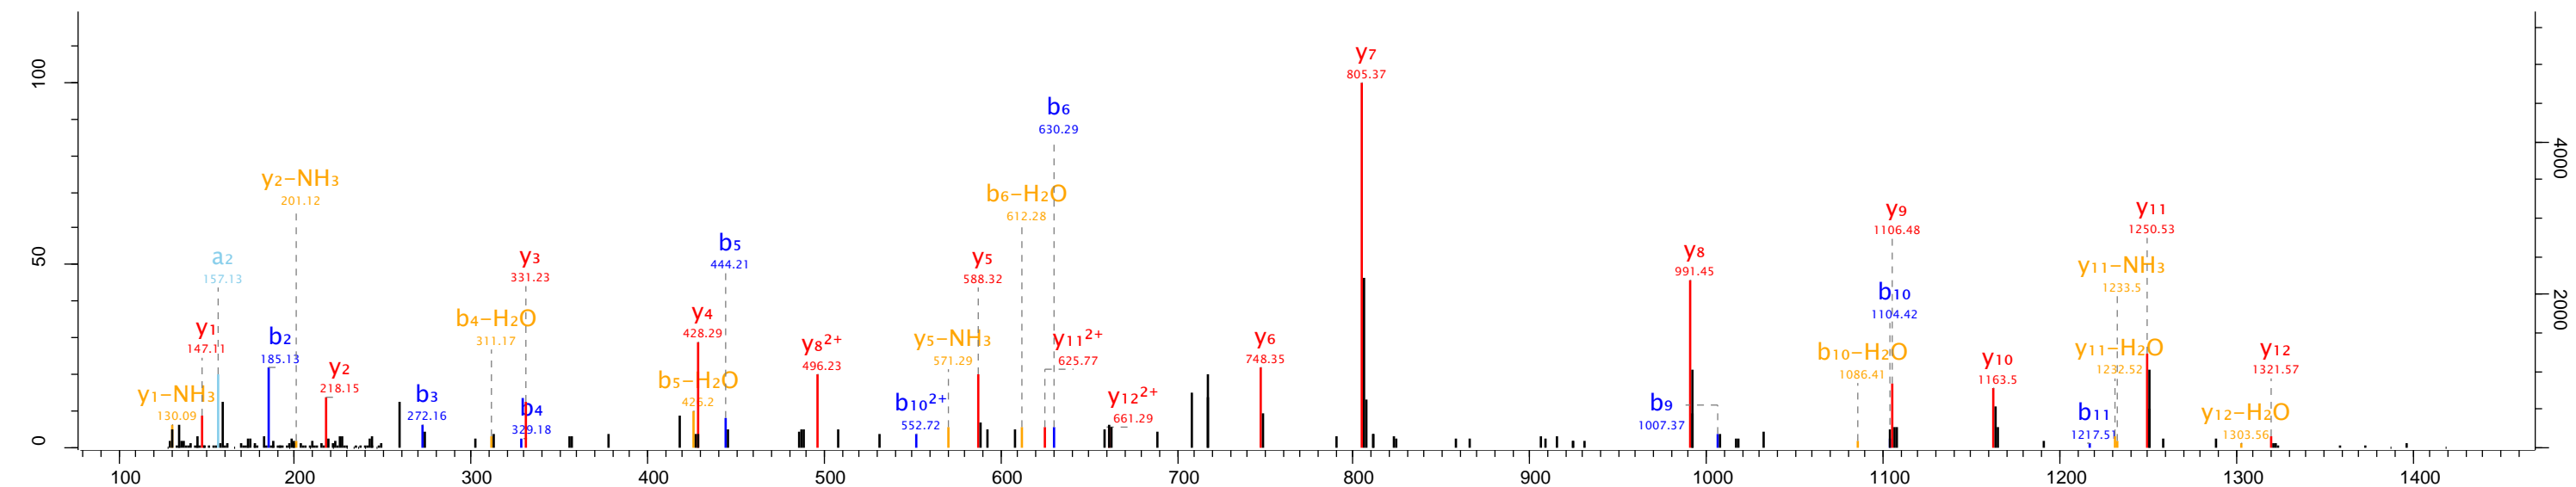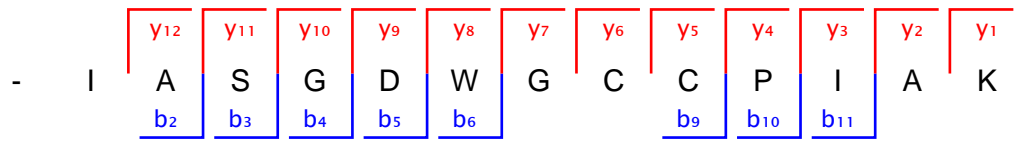

Spectral Annotation for Single-Peptide IDs in 16-cell Embryo using Q-OT-LIT

Raw file 2015-01-05\_CL03\_XenEmb\_x2 Scan 33810 Method ITMS; HCD Score 173.76 m/z 717.83

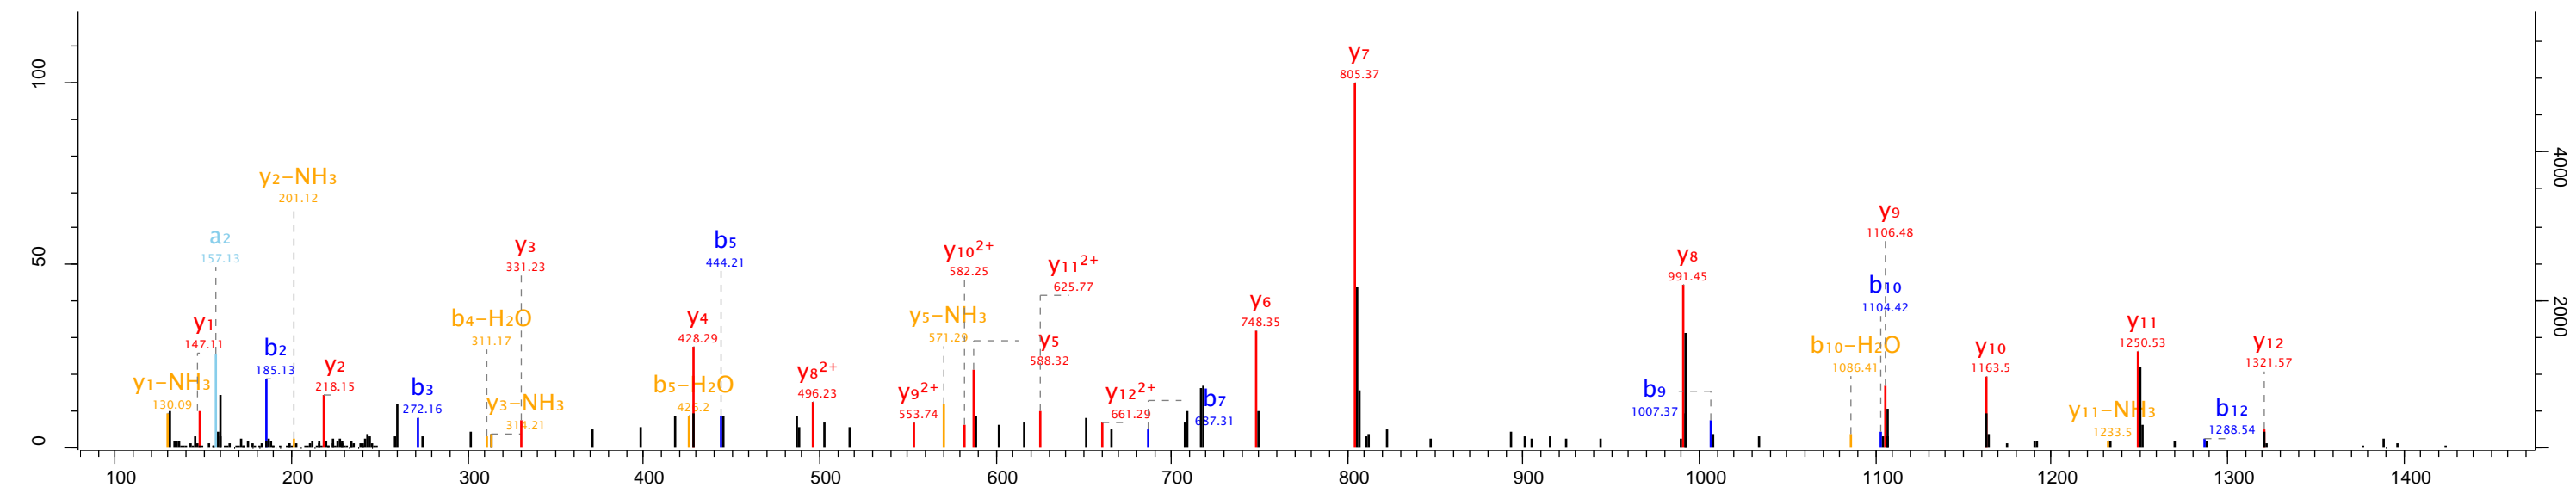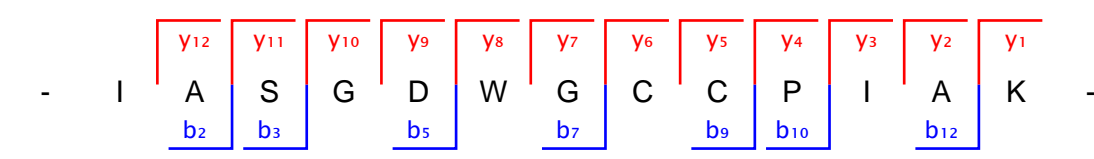

Spectral Annotation for Single-Peptide IDs in 16-cell Embryo using Q-OT-LIT

Raw file 2015-01-05\_CL03\_XenEmb\_x2 Scan 33834 Method ITMS; HCD Score 193.15 m/z 717.82

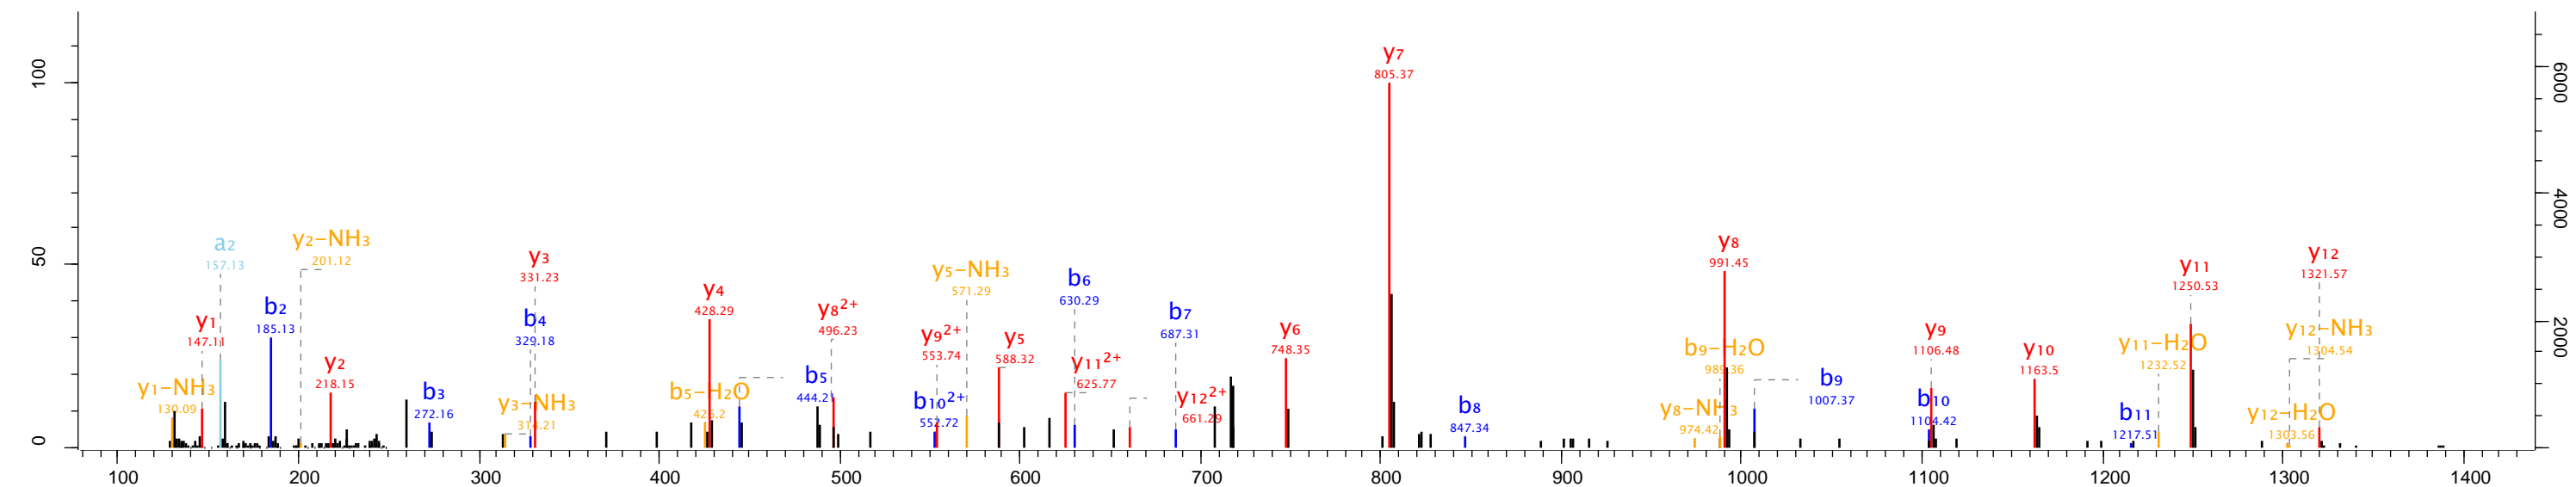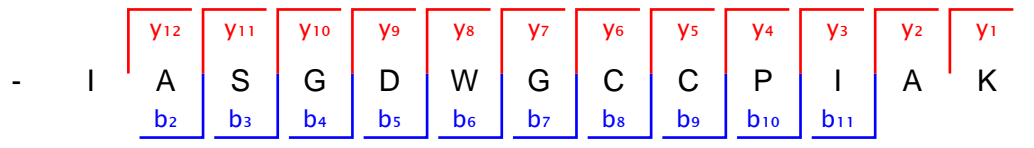

Raw file: 2015-01-05\_CL03\_XenEmb\_x2  
 Scan: 33947  
 Method: ITMS; HCD  
 Score: 52.14  
 m/z: 872.45

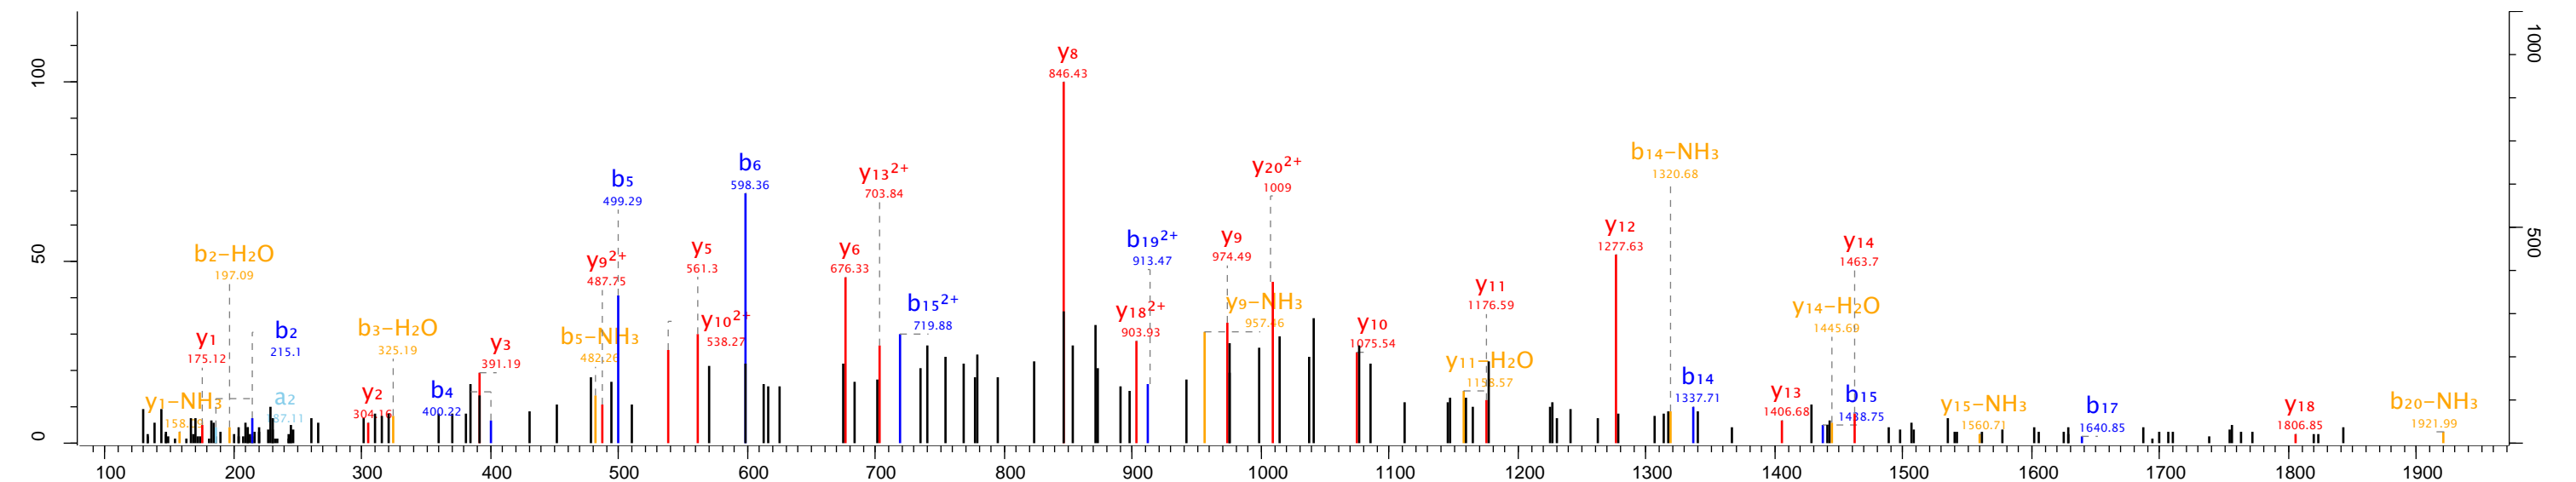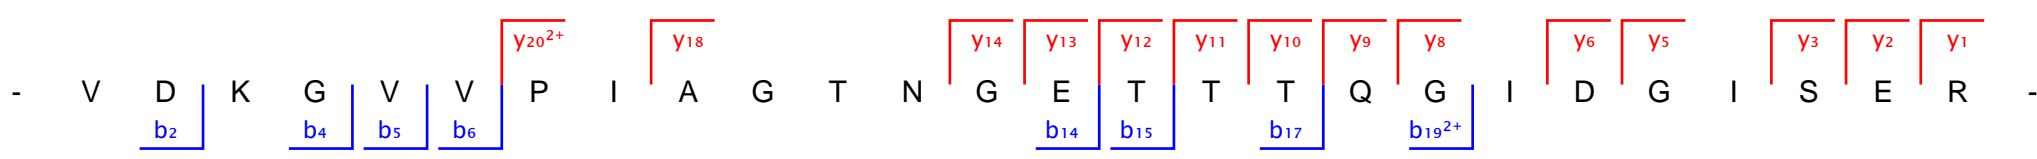

Spectral Annotation for Single-Peptide IDs in 16-cell Embryo using Q-OT-LIT

Raw file 2015-01-05\_CL03\_XenEmb\_x2 Scan 33986 Method ITMS; HCD Score 64.1 m/z 724.42

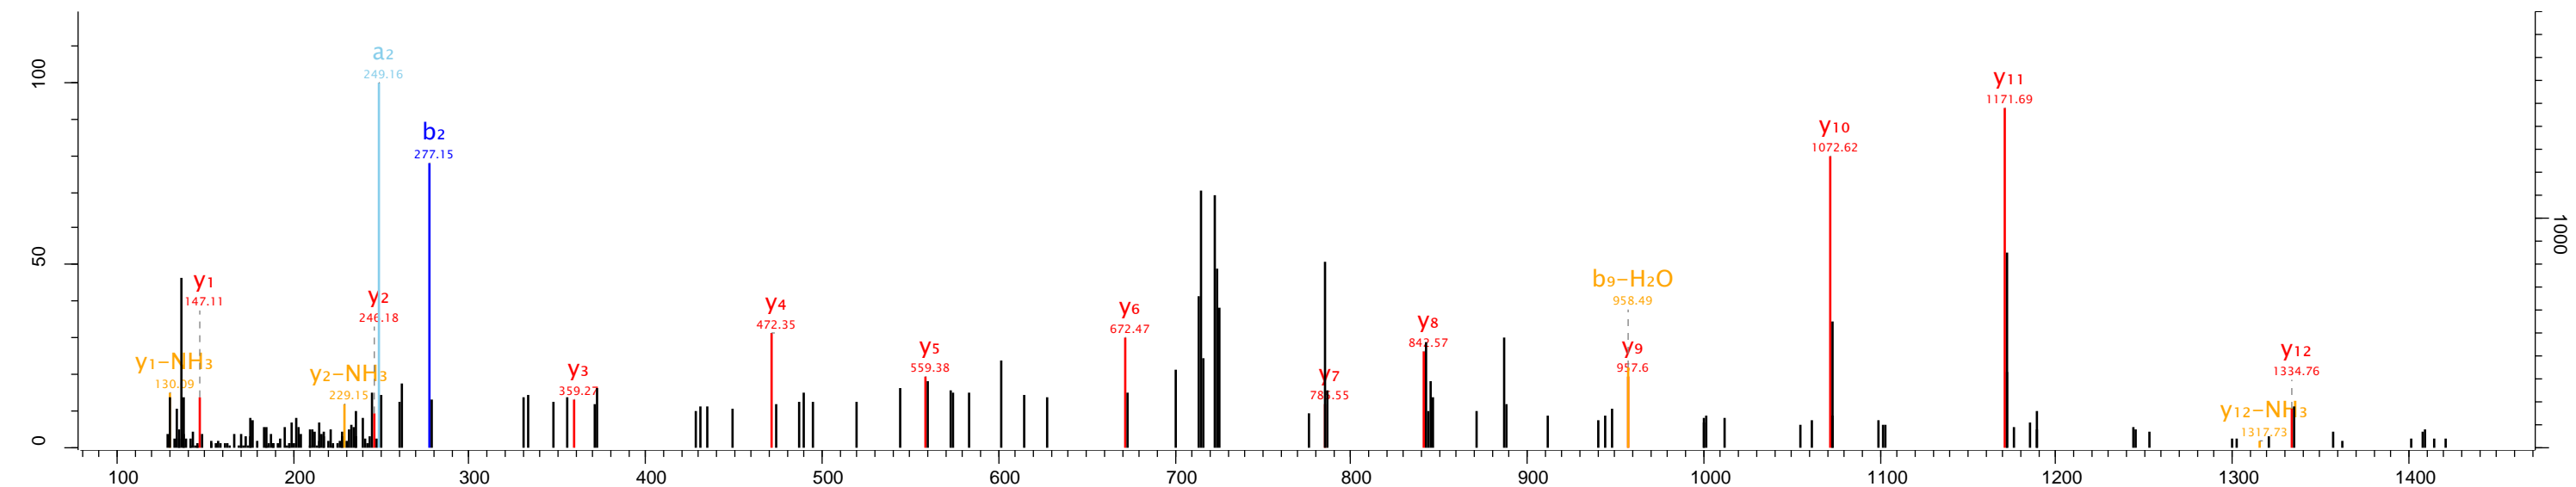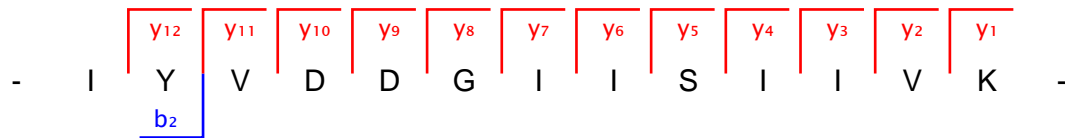

Spectral Annotation for Single-Peptide IDs in 16-cell Embryo using Q-OT-LIT

Raw file 2015-01-05\_CL03\_XenEmb\_x2 Scan 34043 Method ITMS; HCD Score 46.82 m/z 920.47

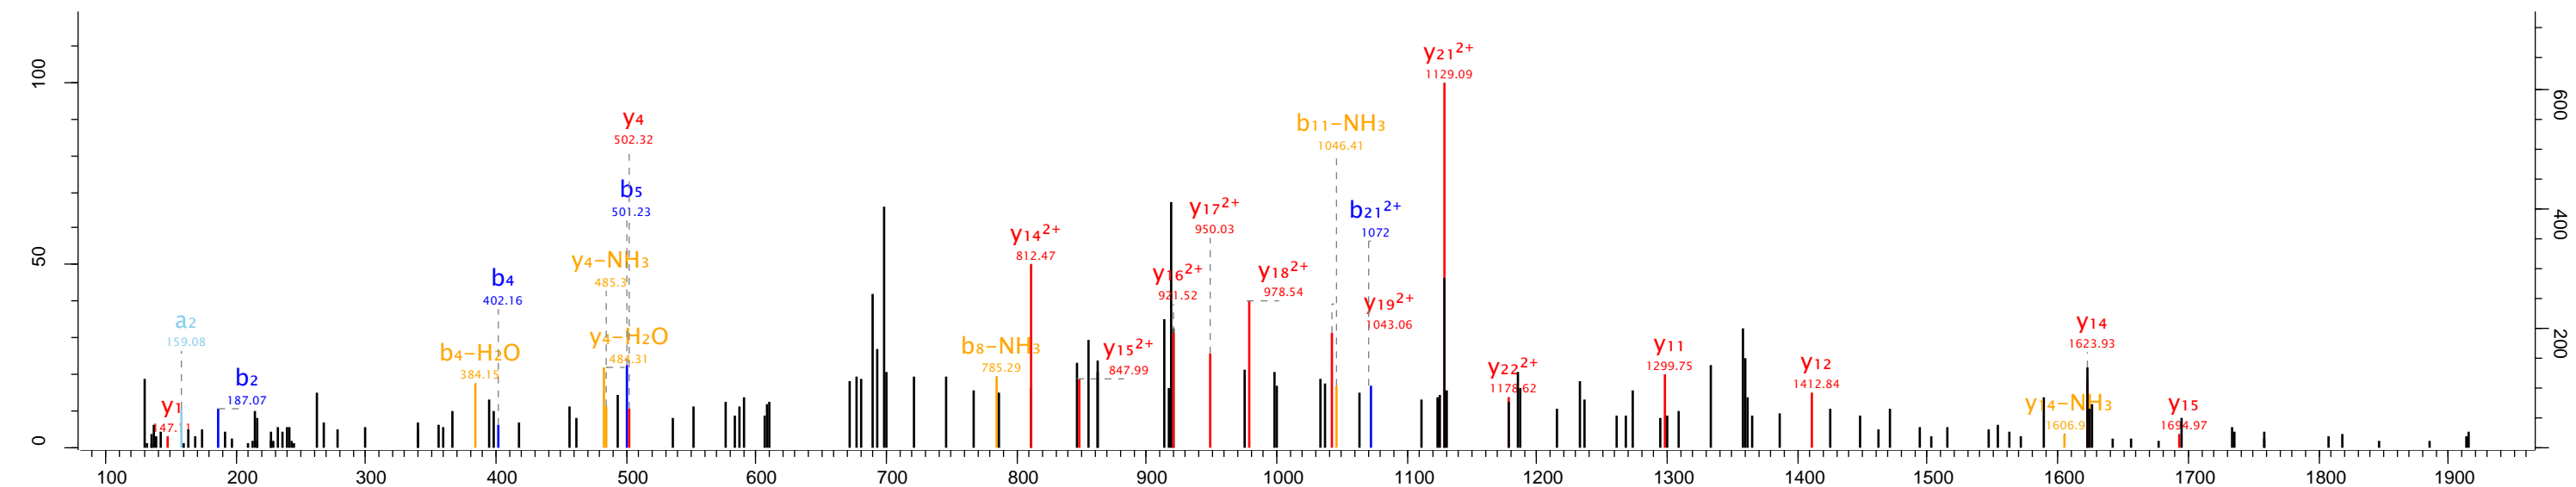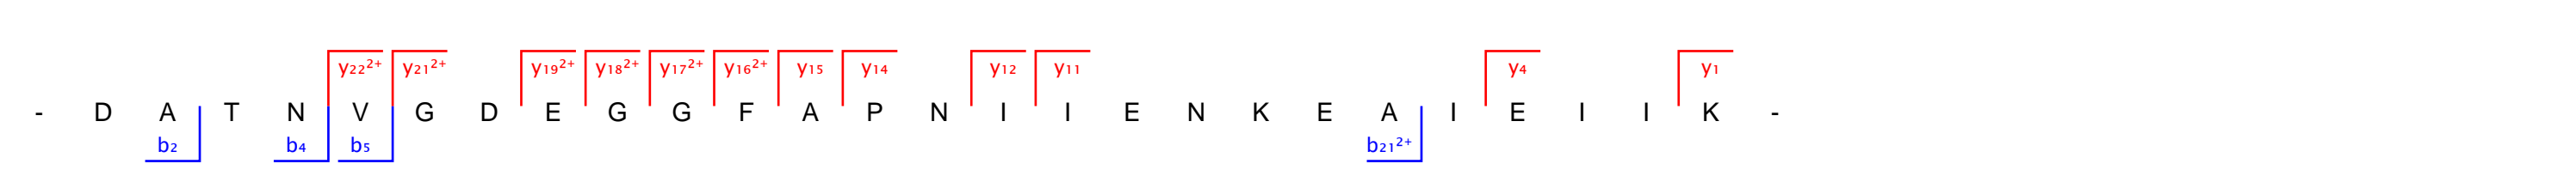

Raw file 2015-01-05\_CL03\_XenEmb\_x2 Scan 34204 Method ITMS; HCD Score 68 m/z 714.92

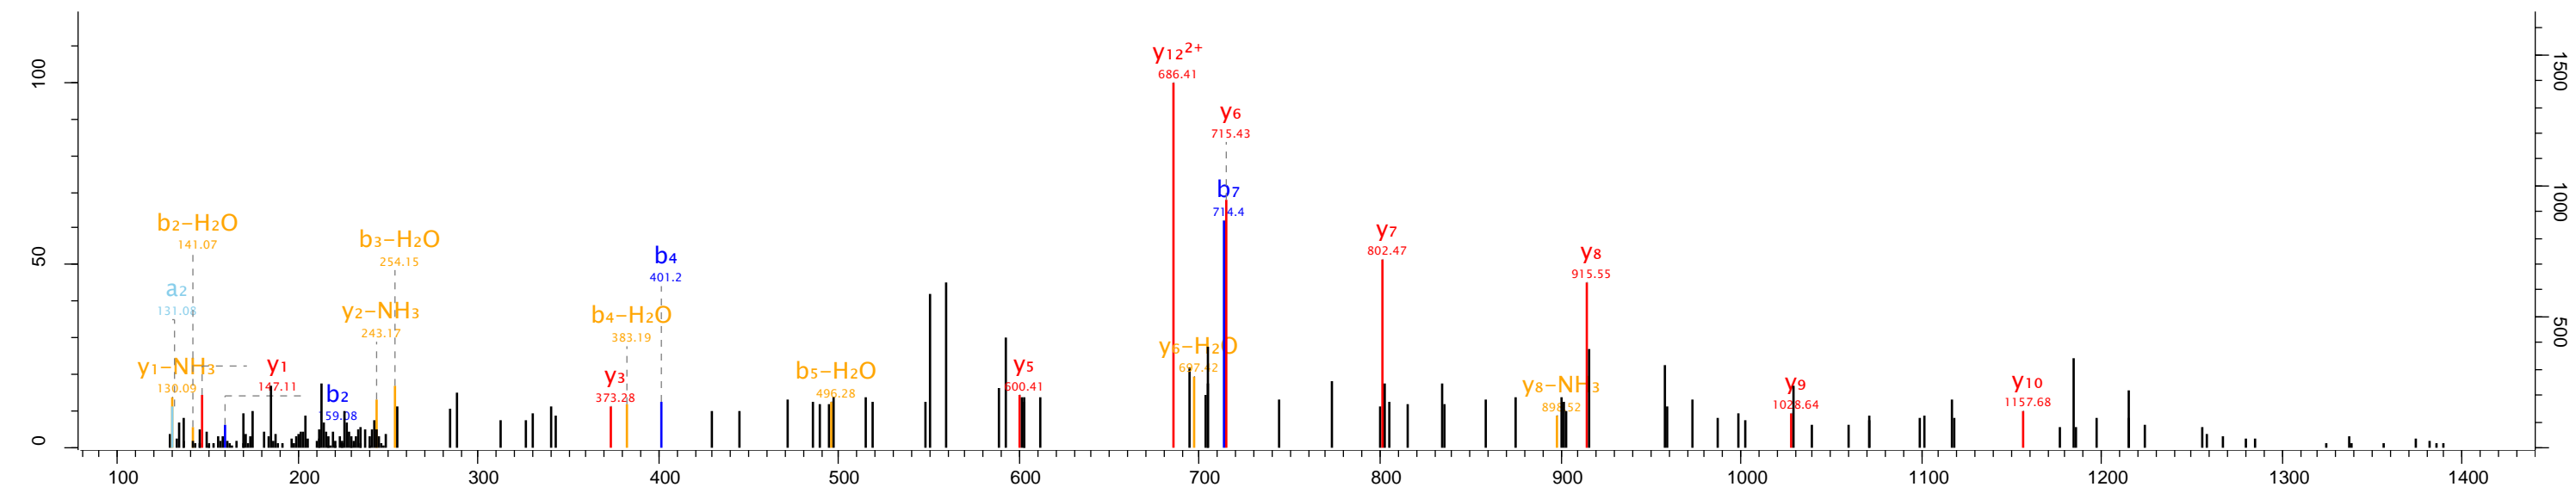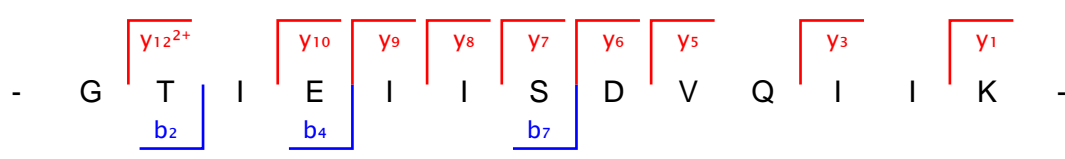

Spectral Annotation for Single-Peptide IDs in 16-cell Embryo using Q-OT-LIT

Raw file 2015-01-05\_CL03\_XenEmb\_x2 Scan 34244 Method ITMS; HCD Score 49.87 m/z 953.78

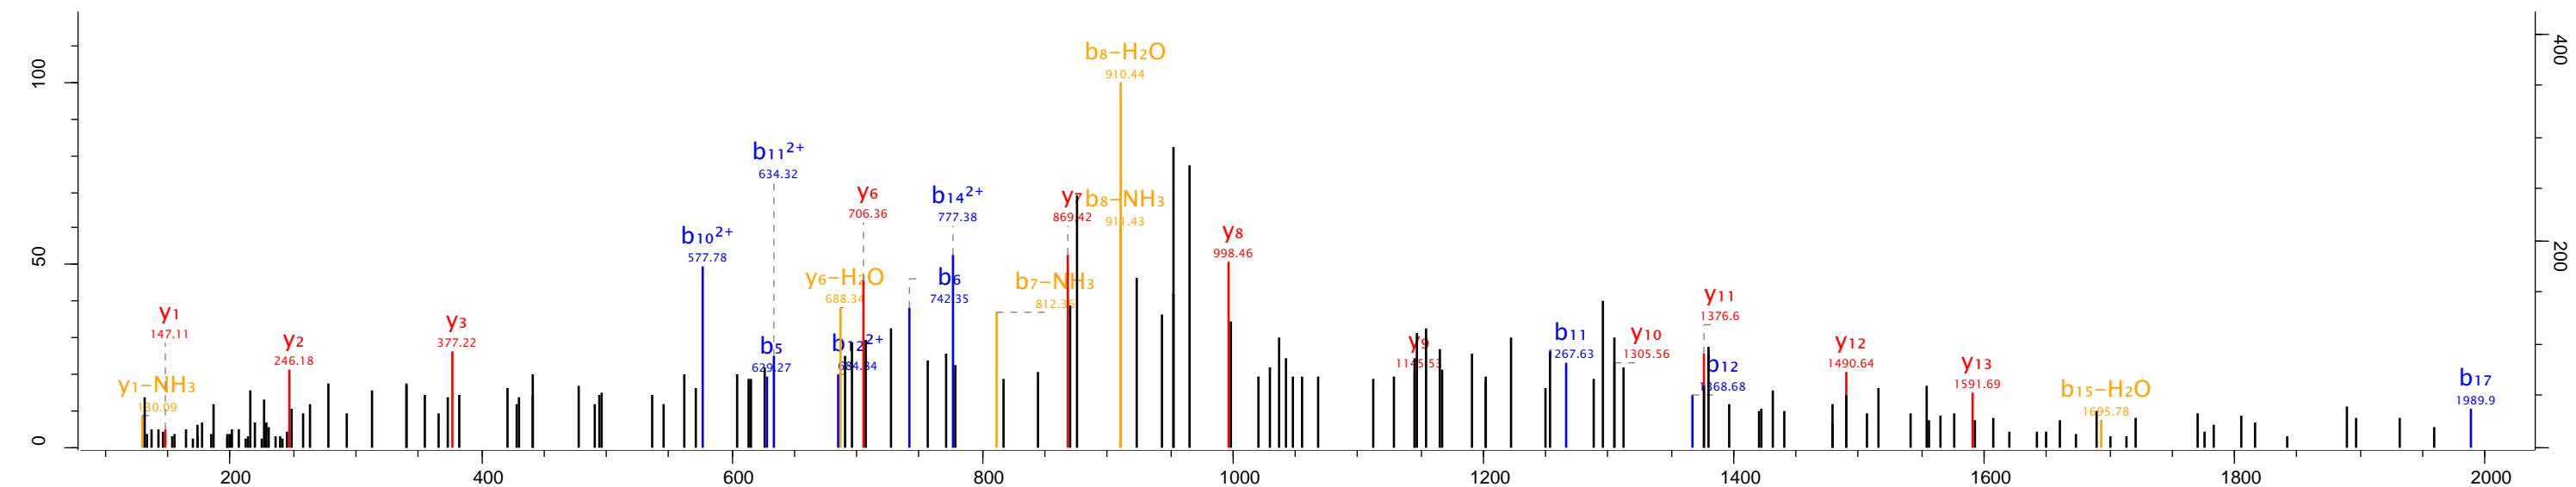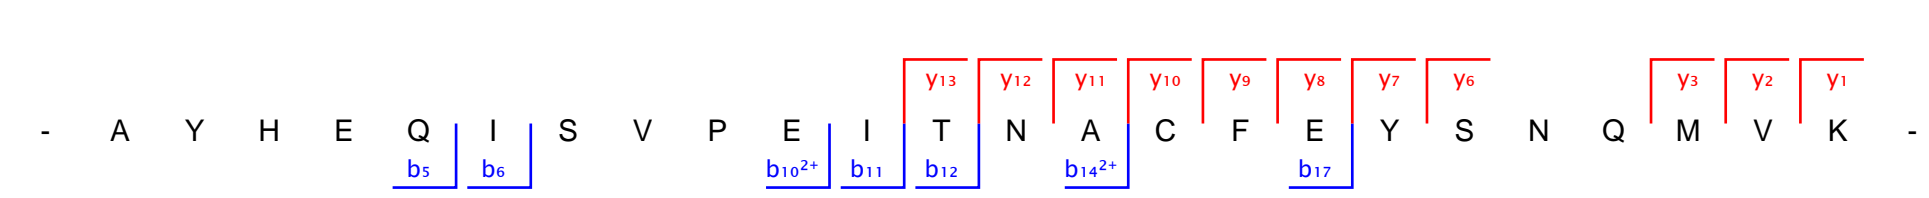

Spectral Annotation for Single-Peptide IDs in 16-cell Embryo using Q-OT-LIT



Raw file: 2015-01-05\_CL03\_XenEmb\_x2  
 Scan: 34281 Method: ITMS; HCD Score: 77.58 m/z: 1032.14

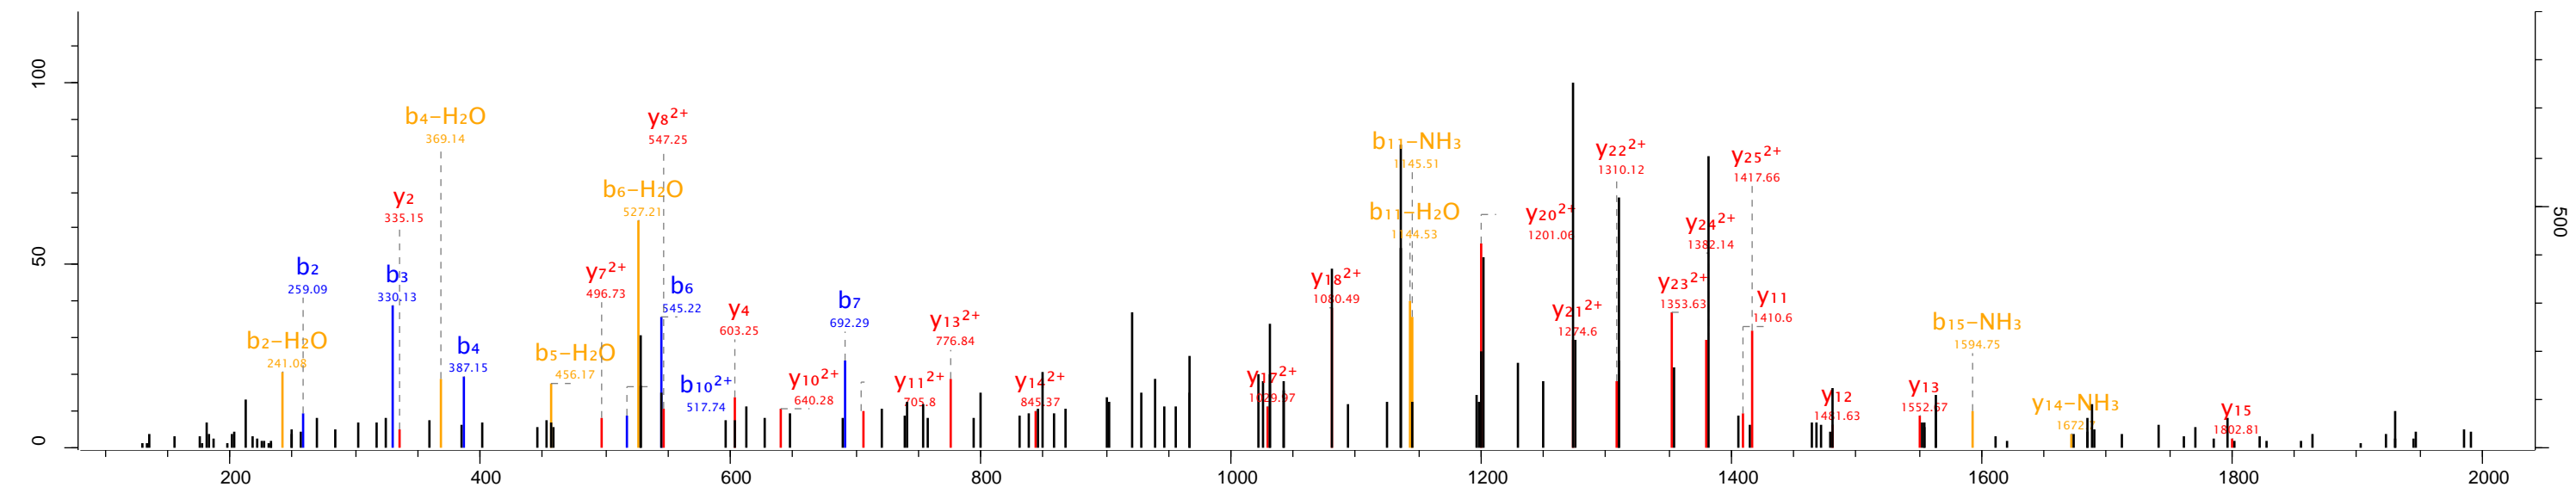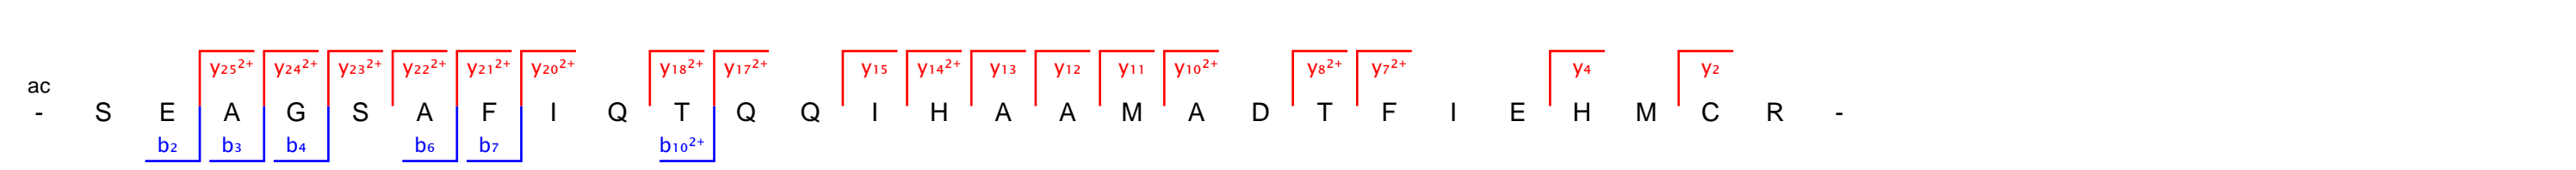

Spectral Annotation for Single-Peptide IDs in 16-cell Embryo using Q-OT-LIT

Raw file 2015-01-05\_CL03\_XenEmb\_x2 Scan 34299 Method ITMS; HCD Score 87.65 m/z 920.47

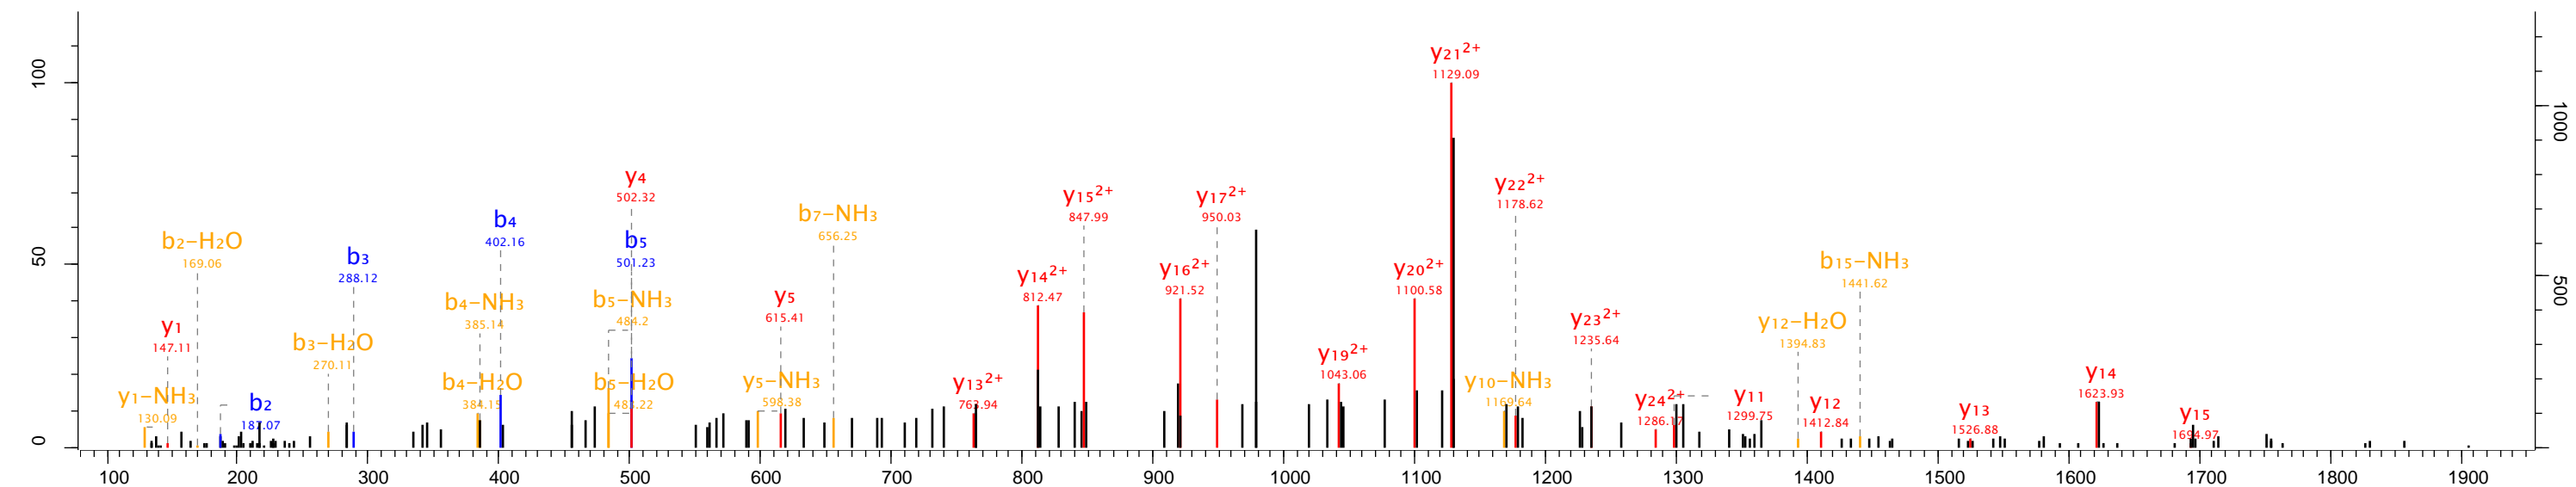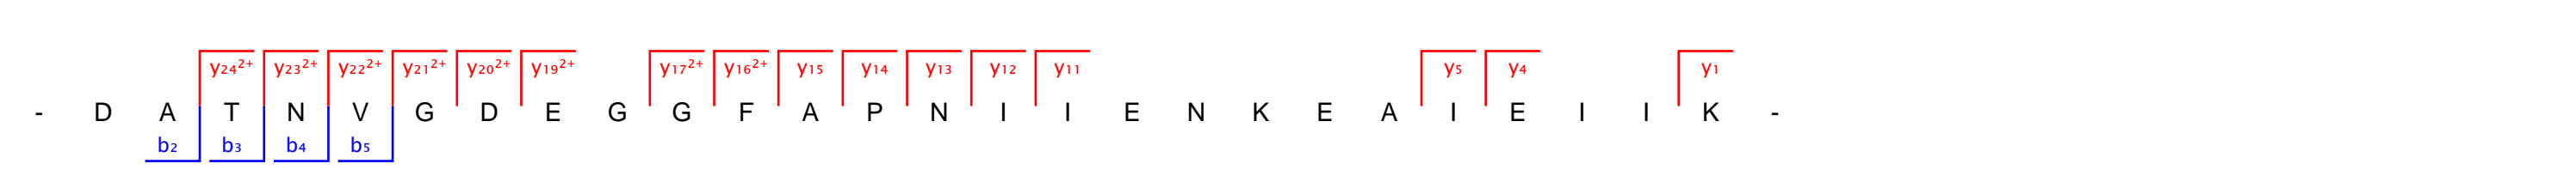

Raw file 2015-01-05\_CL03\_XenEmb\_x2 Scan 34382 Method ITMS; HCD Score 122.39 m/z 1032.15

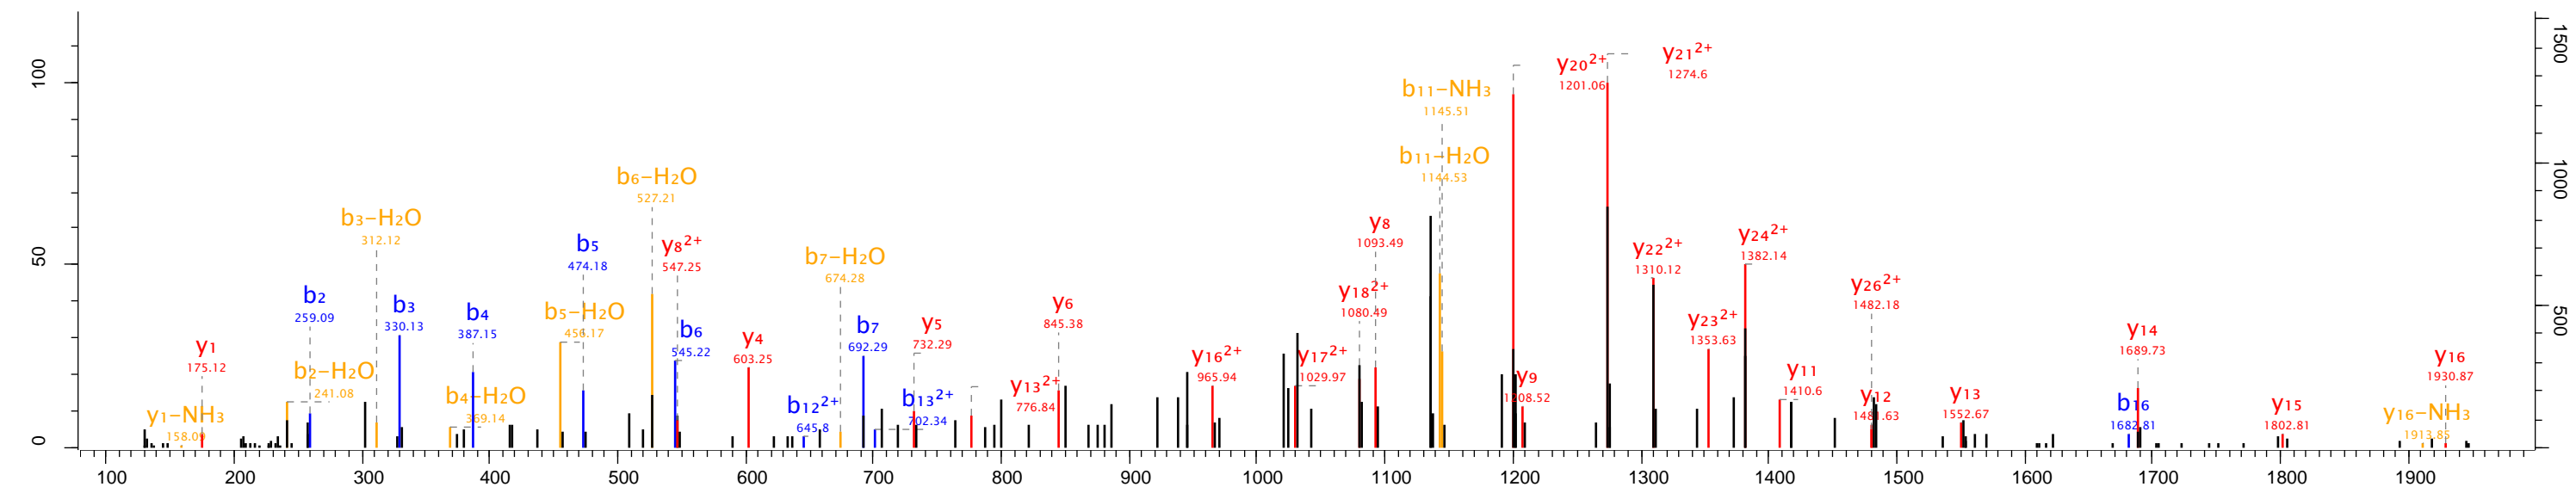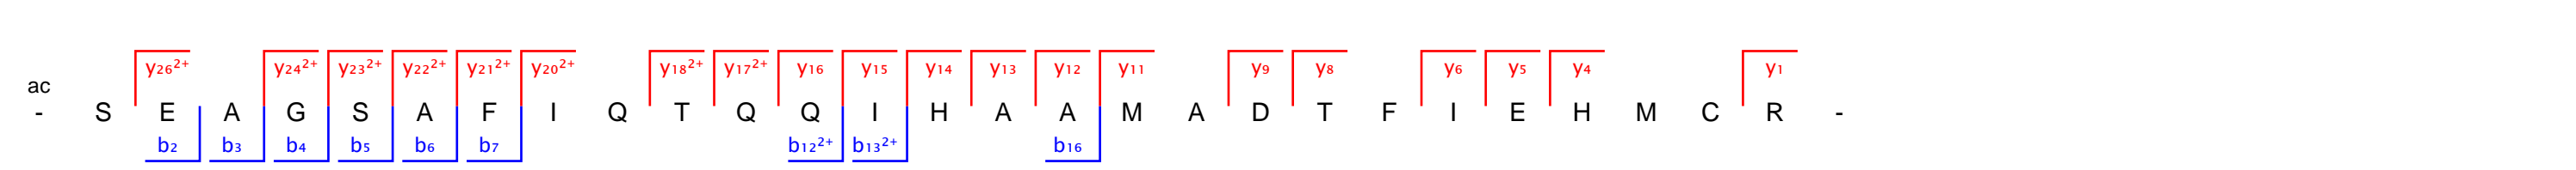

Raw file 2015-01-05\_CL03\_XenEmb\_x2 Scan 34399 Method ITMS; HCD Score 120.44 m/z 1031.8

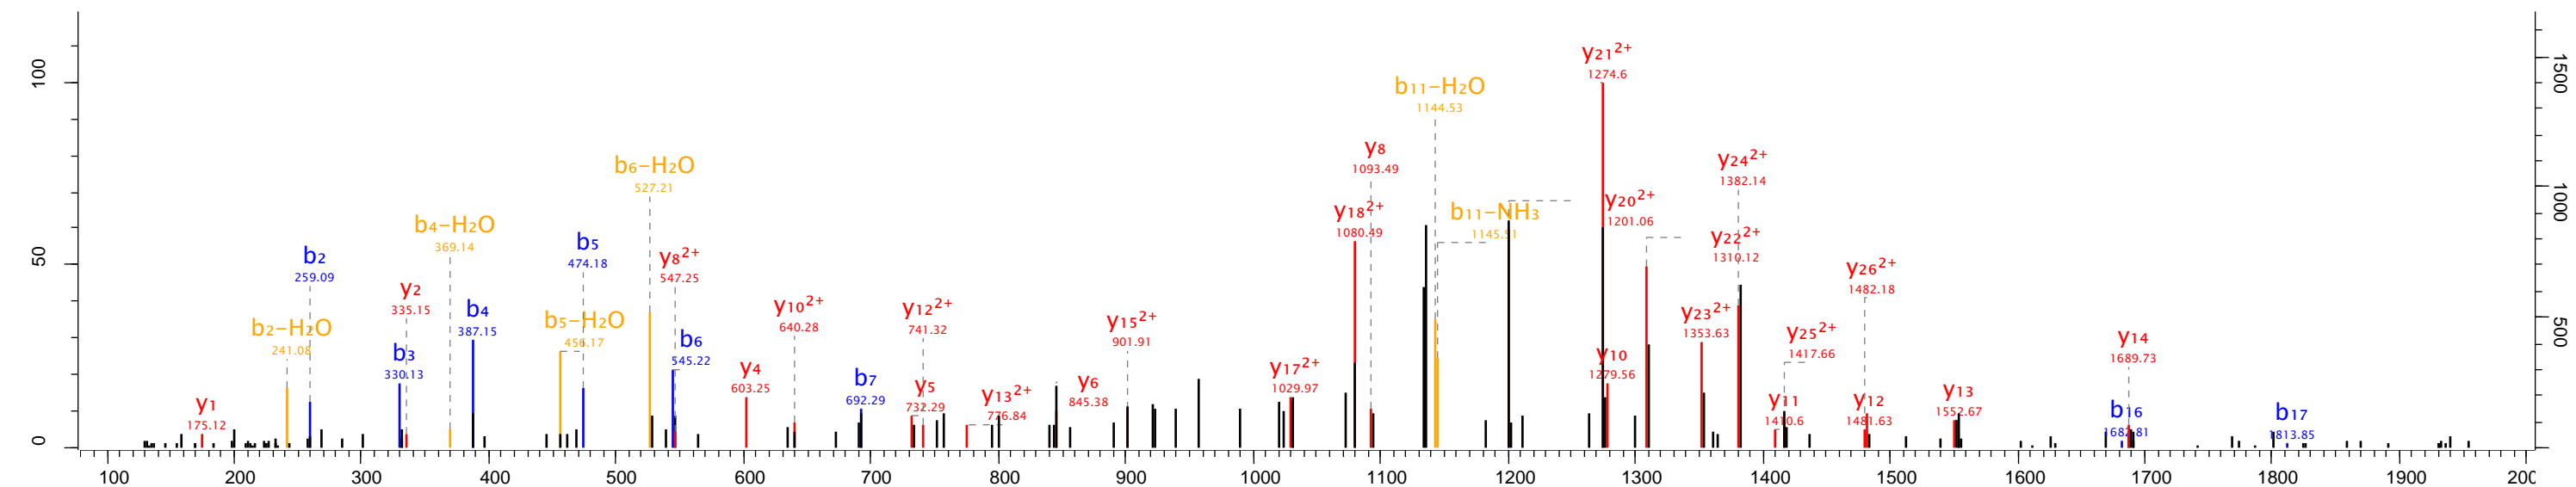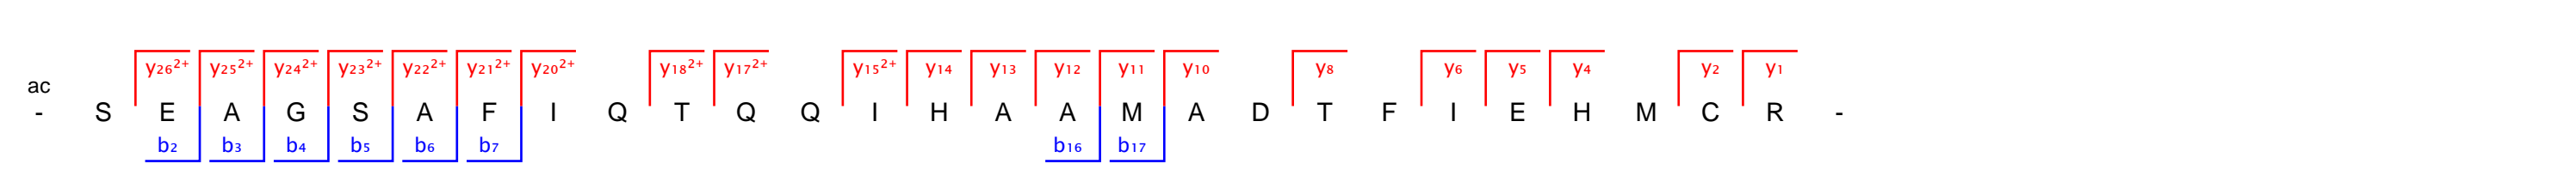

Raw file 2015-01-05\_CL03\_XenEmb\_x2  
 Scan 34563 Method ITMS; HCD Score 78.65 m/z 933.15

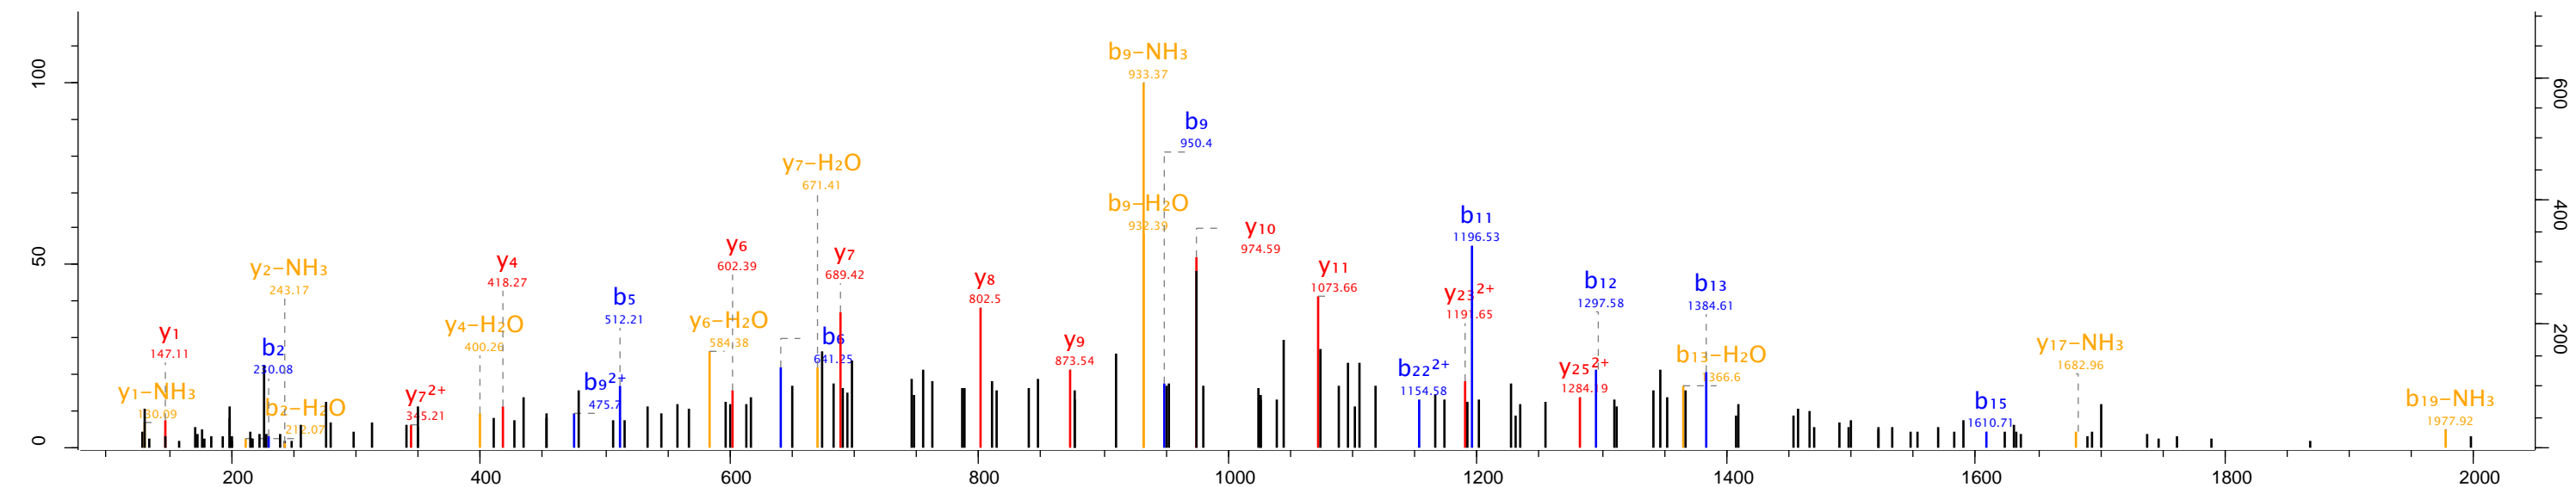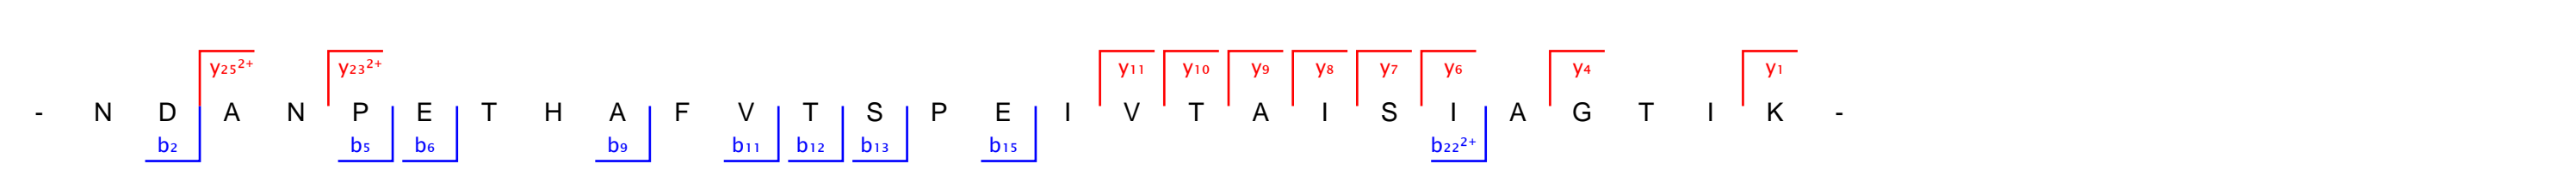

Spectral Annotation for Single-Peptide IDs in 16-cell Embryo using Q-OT-LIT

Raw file 2015-01-05\_CL03\_XenEmb\_x2 Scan 34643 Method ITMS; HCD Score 58.89 m/z 792.88

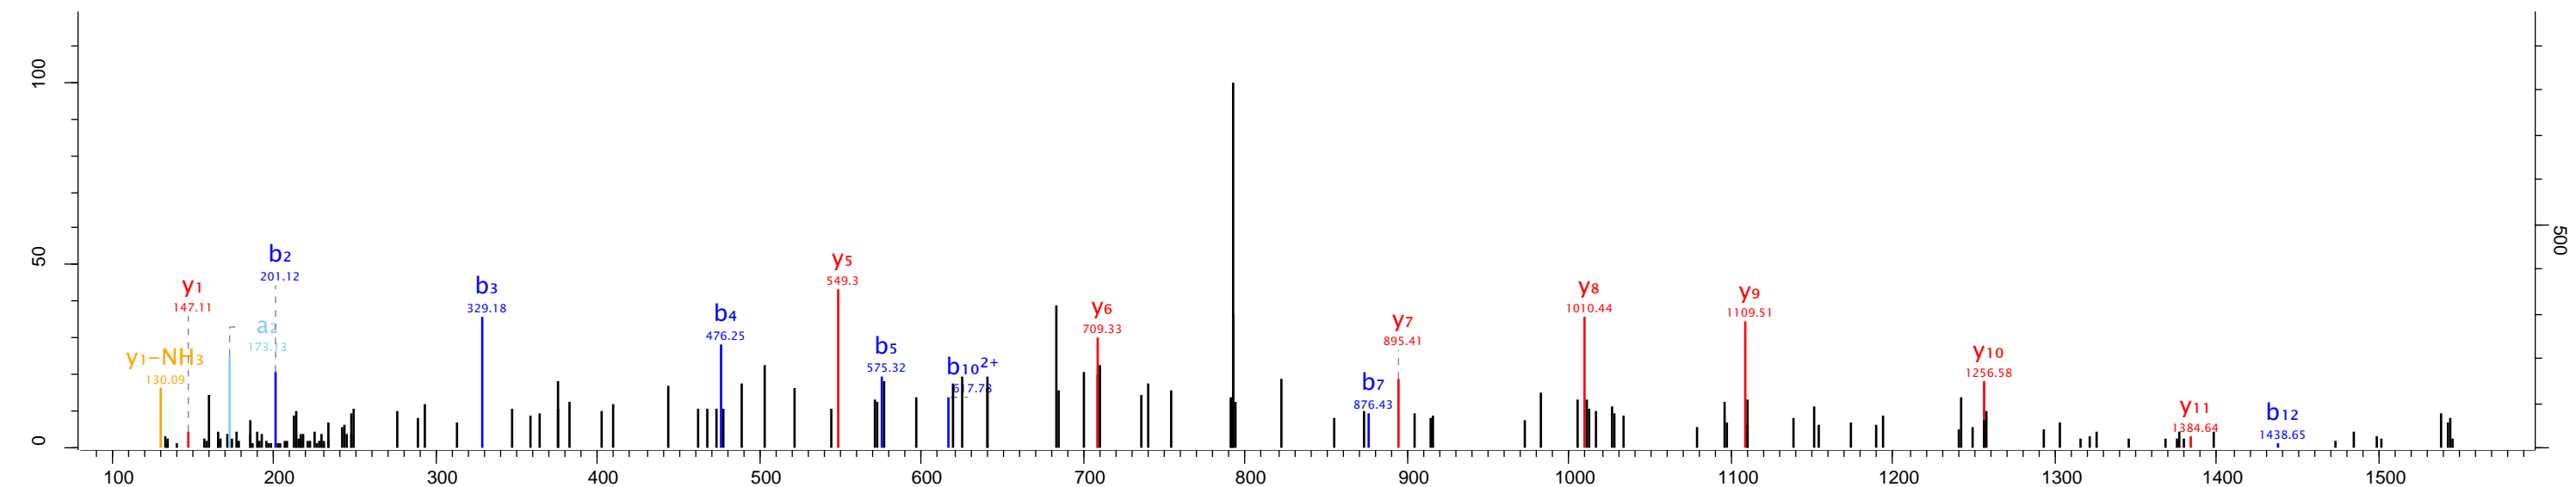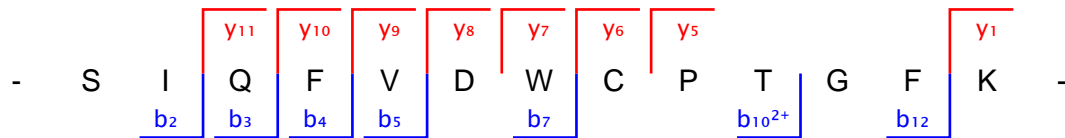

Raw file: 2015-01-05\_CL03\_XenEmb\_x2  
 Scan: 34857  
 Method: ITMS; HCD  
 Score: 64.41  
 m/z: 760.92

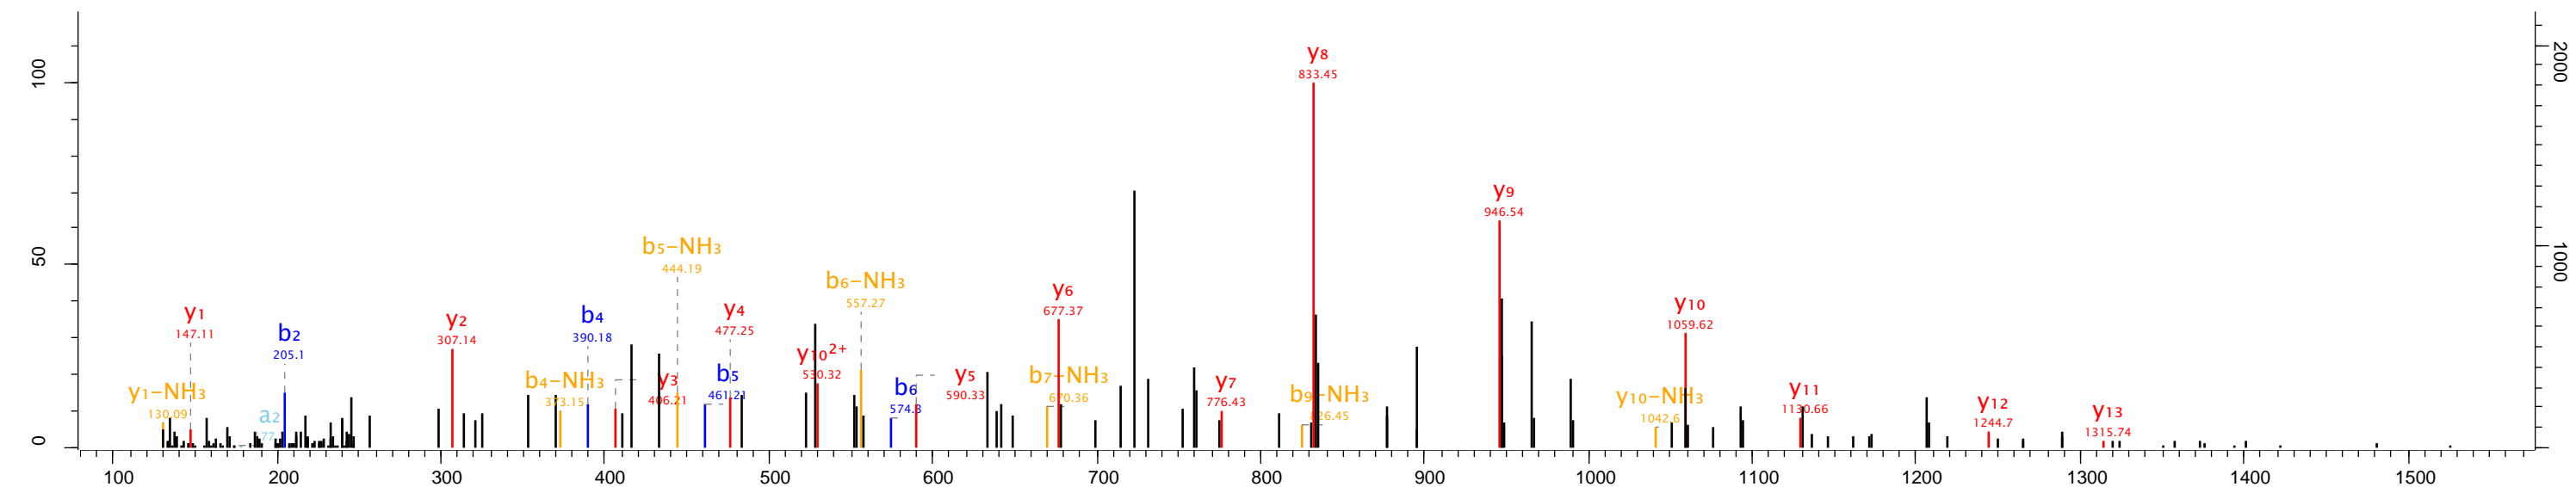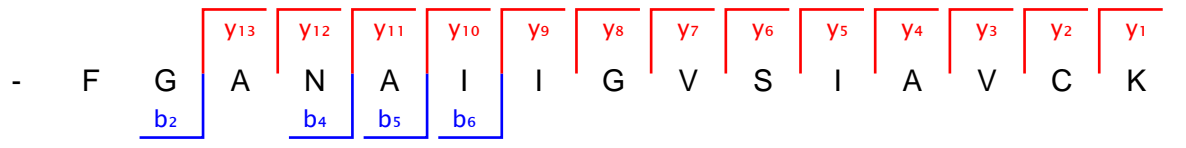

Raw file 2015-01-05\_CL03\_XenEmb\_x2 Scan 34973 Method ITMS; HCD Score 58.46 m/z 780.37

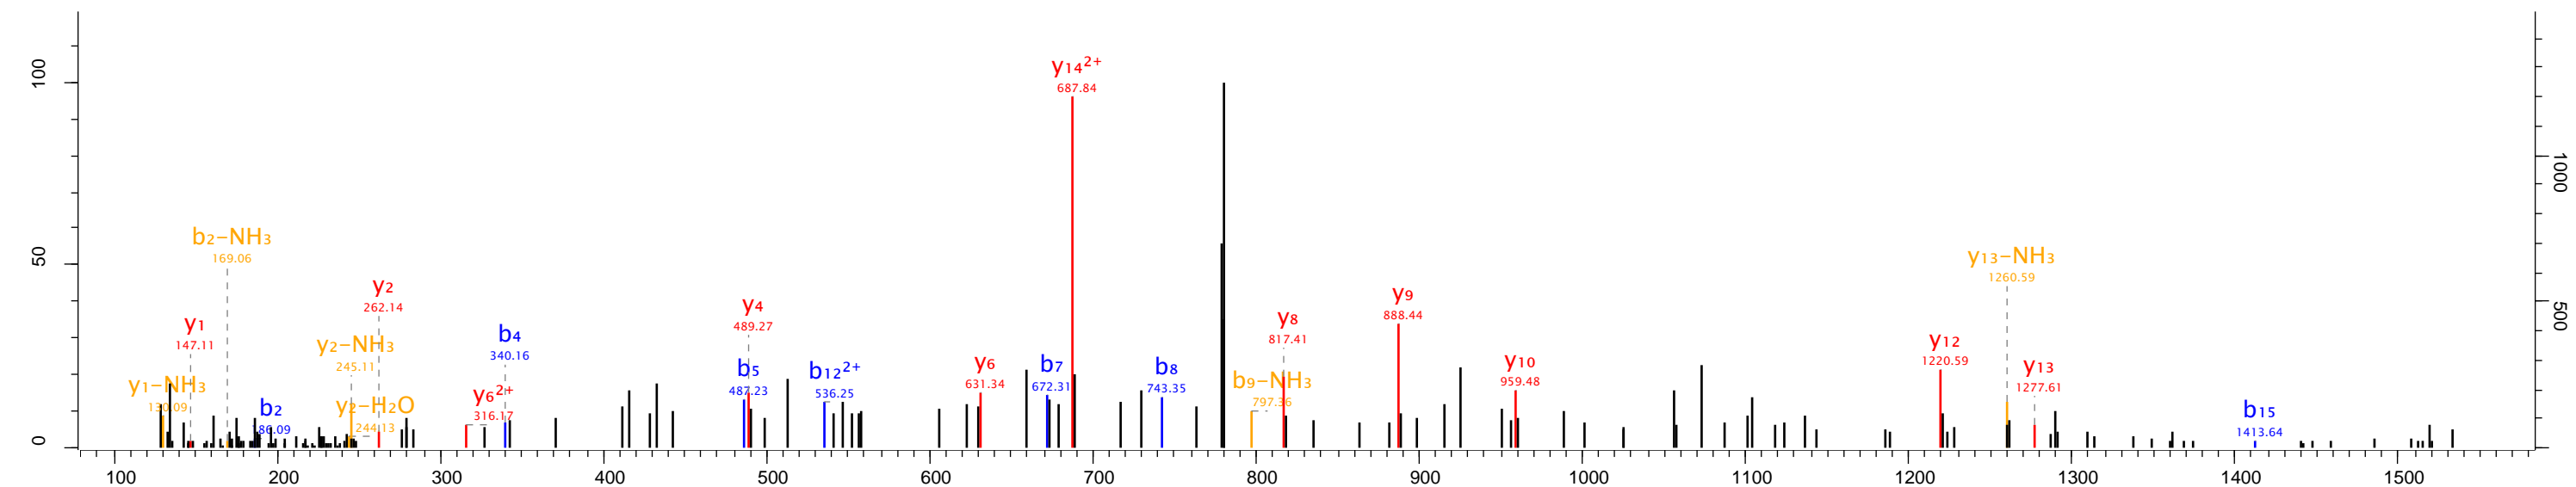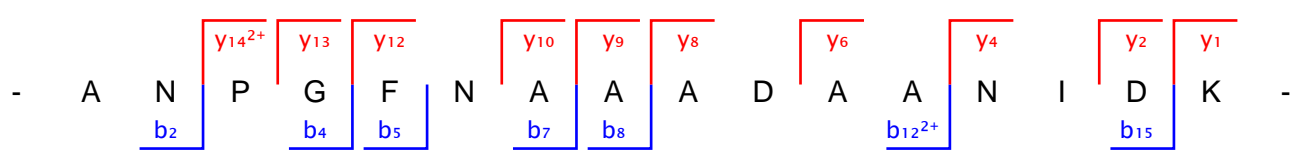



Raw file 2015-01-05\_CL03\_XenEmb\_x2 Scan 34975 Method ITMS; HCD Score 26.94 m/z 1112.28

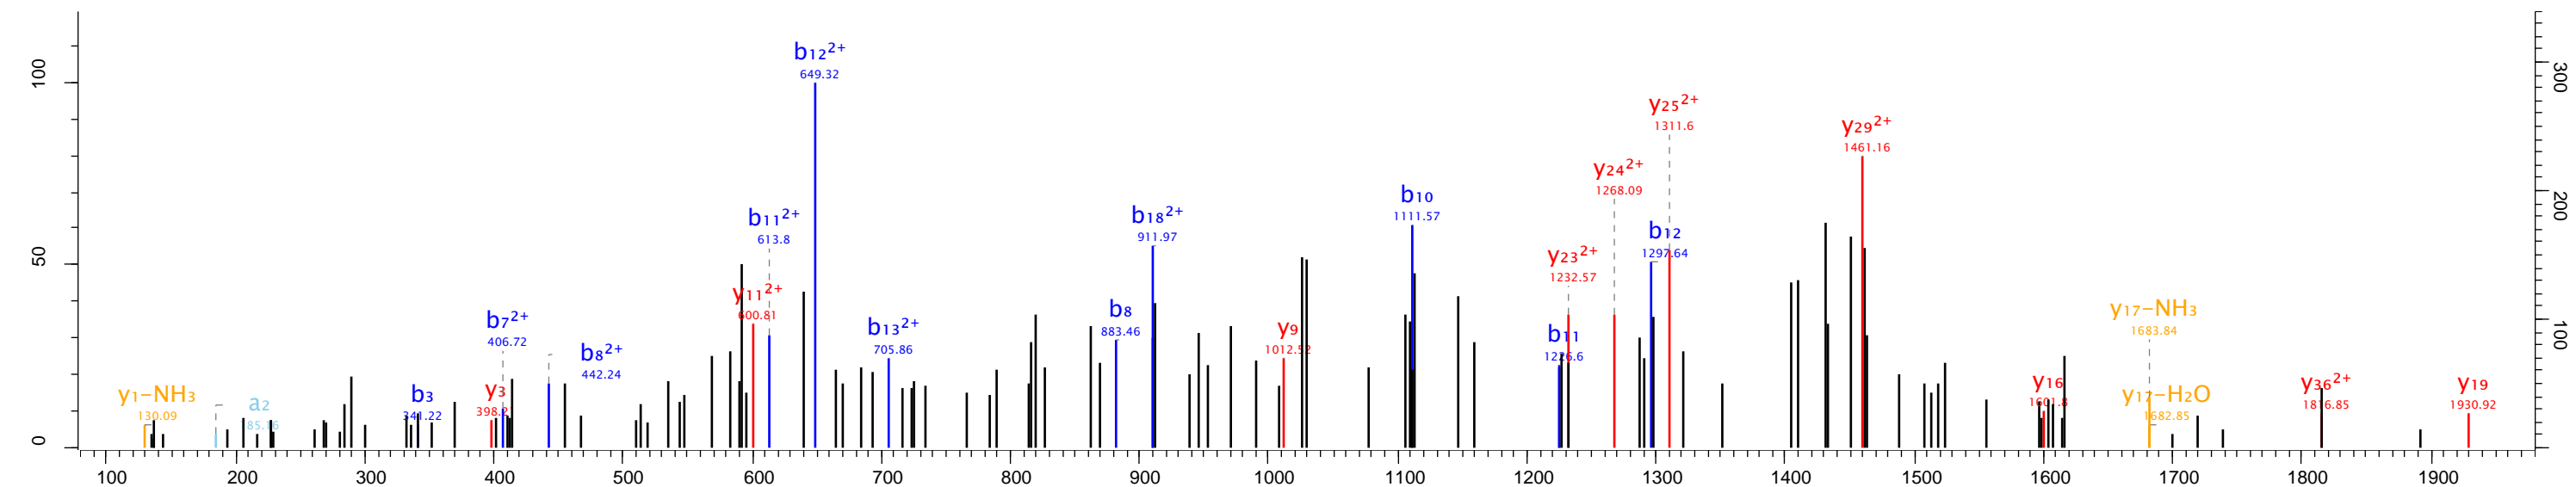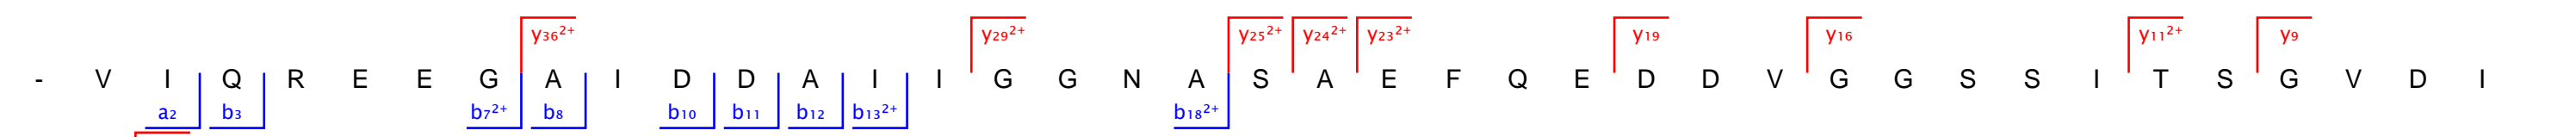

V M Spectra Annotation for Single-Peptide IDs in 16-cell Embryo using Q-OT-LIT

C. Lombard-Banek, S. Reddy, S. A. Moody, P. Nemes, Mol. Cell. Prot. 2016

Raw file: 2015-01-05\_CL03\_XenEmb\_x2  
 Scan: 35104  
 Method: ITMS; HCD  
 Score: 58.95  
 m/z: 1111.55

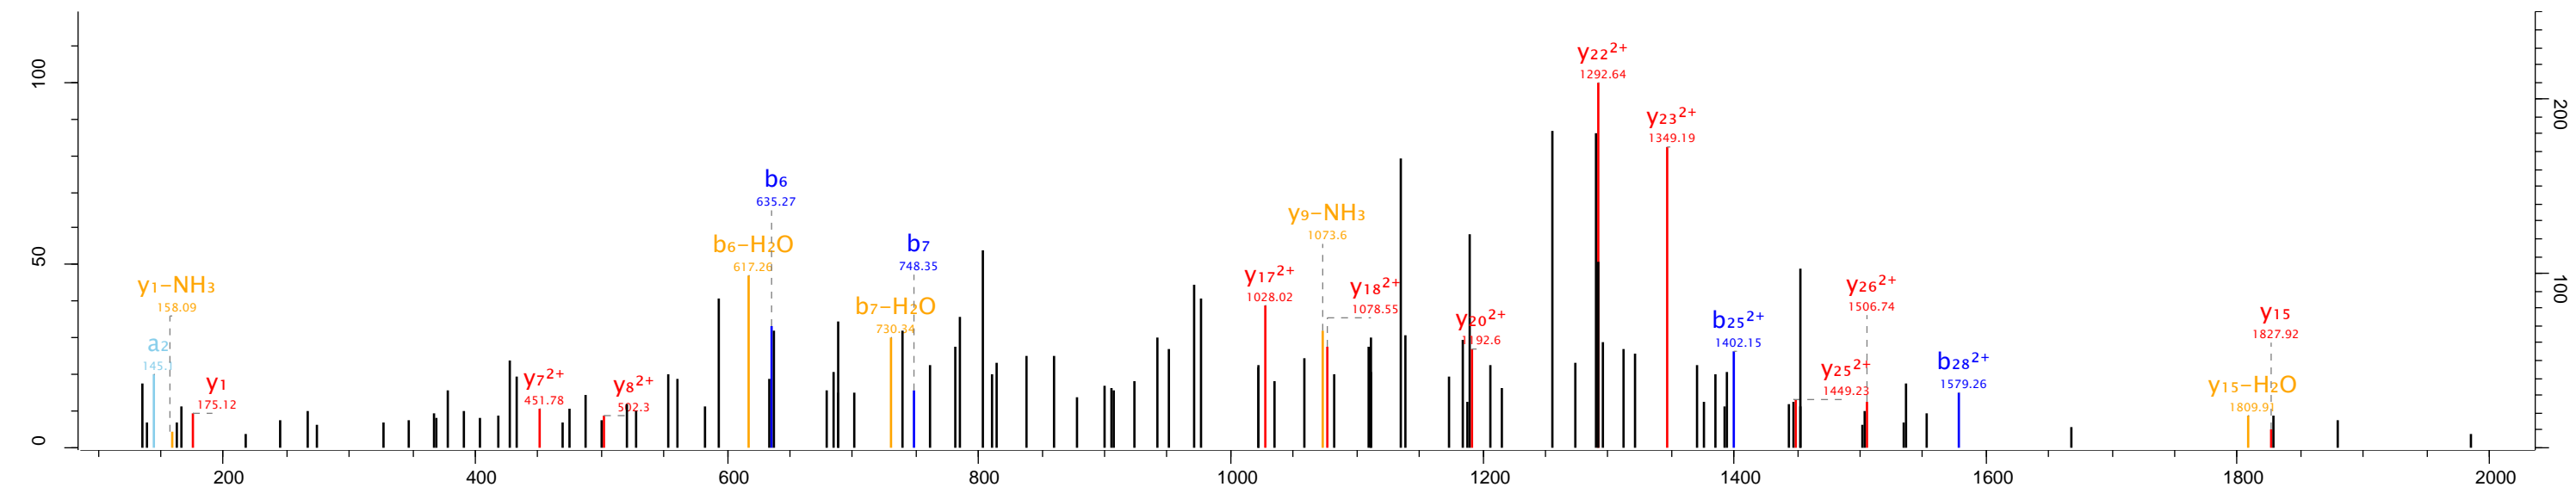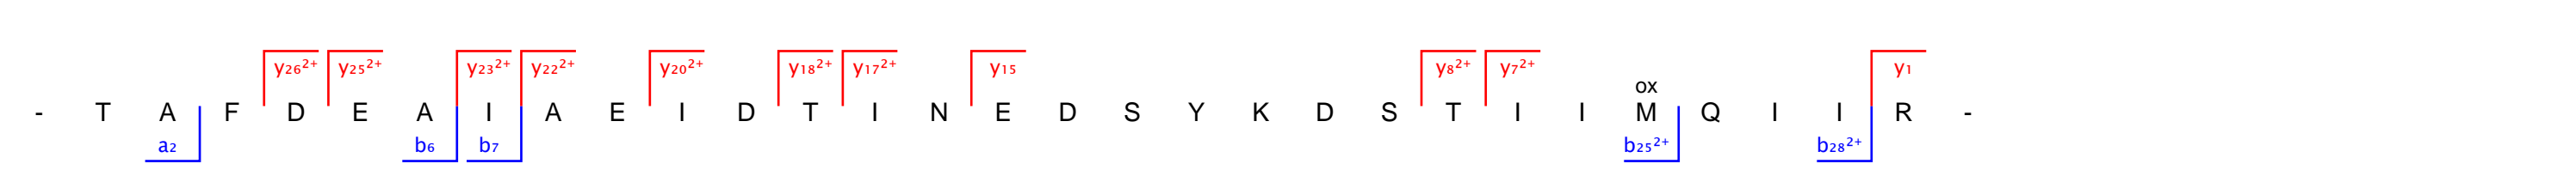

Raw file 2015-01-05\_CL03\_XenEmb\_x2 Scan 35198 Method ITMS; HCD Score 83.31 m/z 1009.15

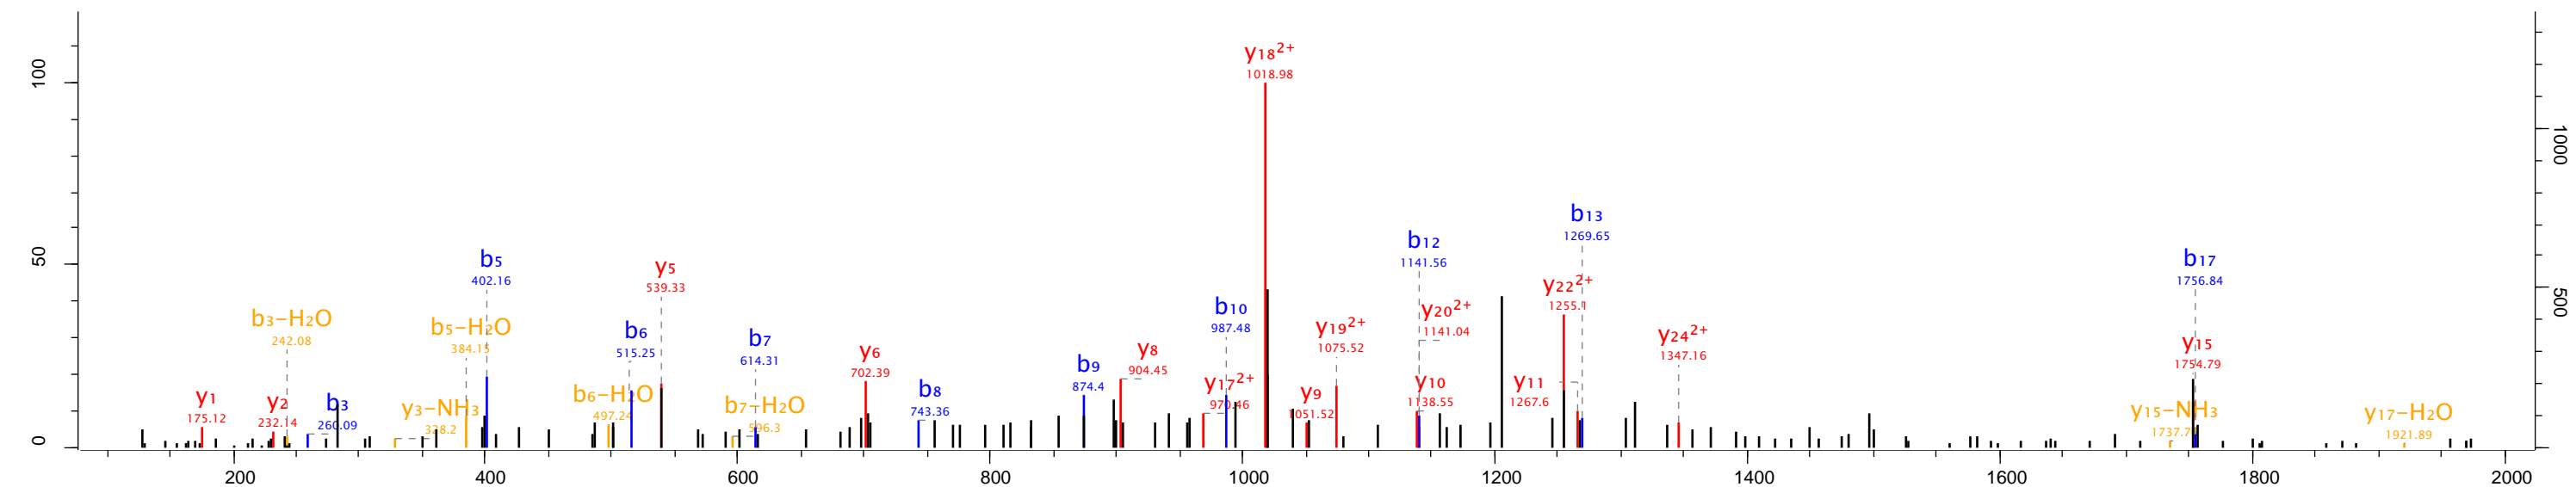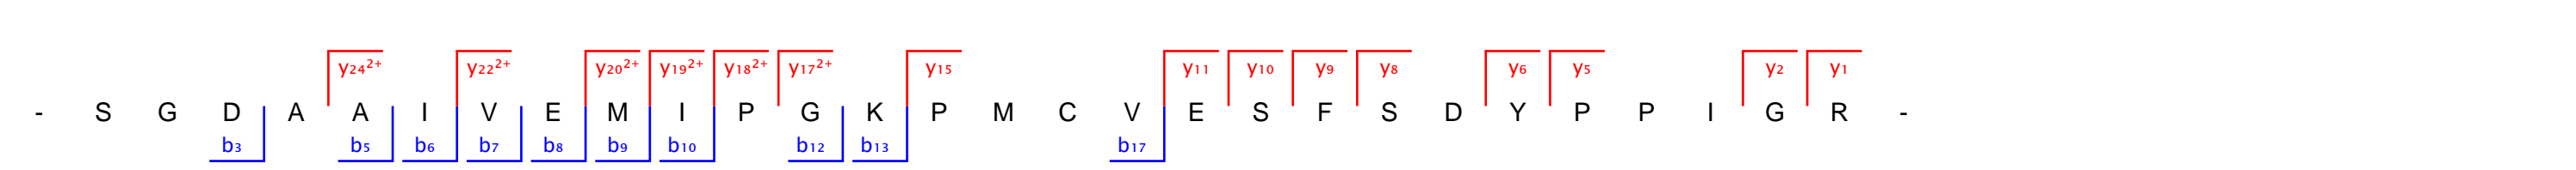

Raw file: 2015-01-05\_CL03\_XenEmb\_x2  
 Scan: 35213 Method: ITMS; HCD Score: 60.47 m/z: 1013.49

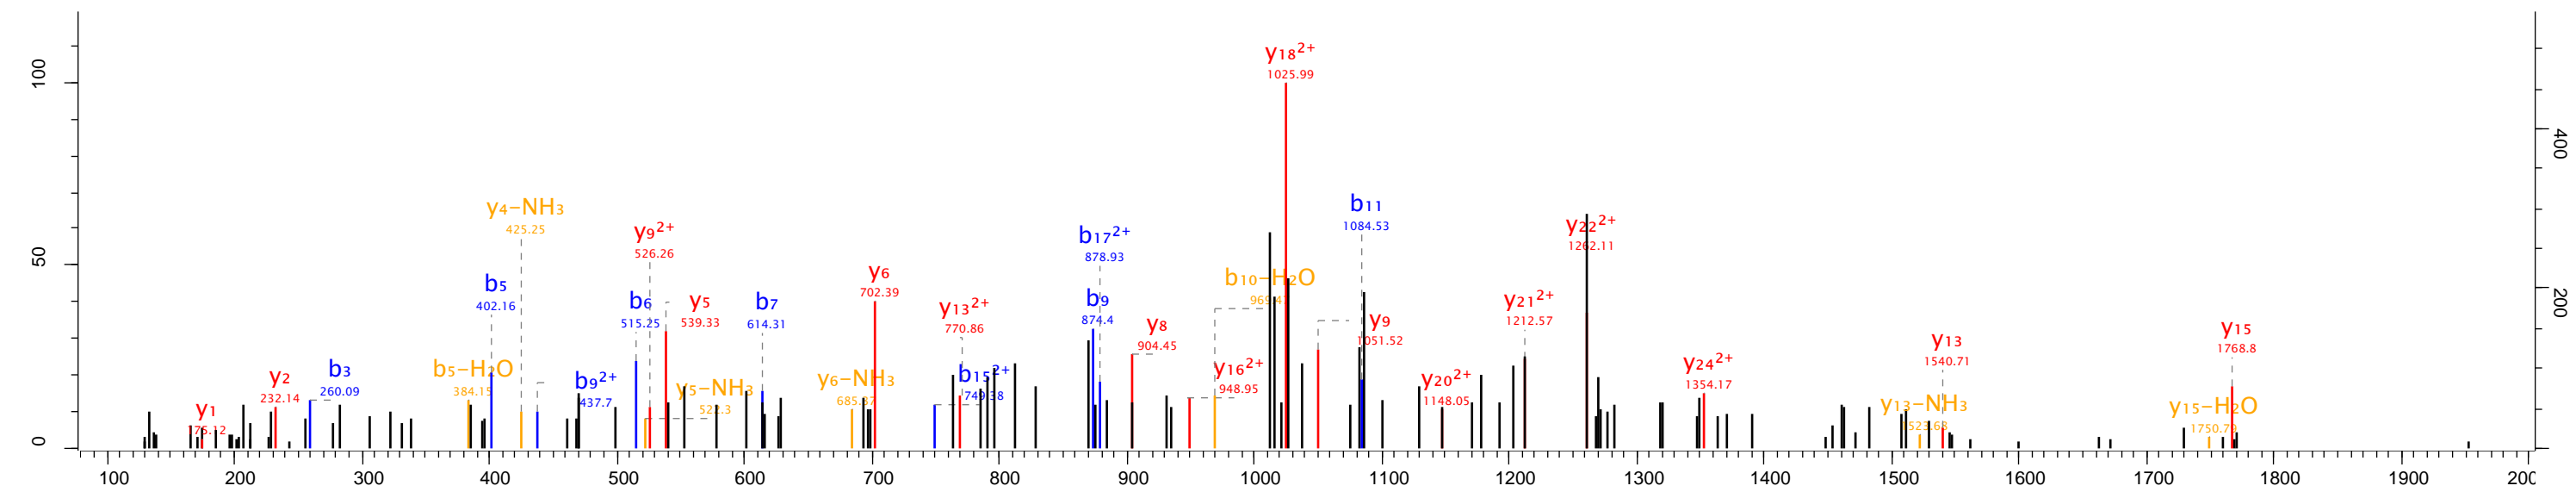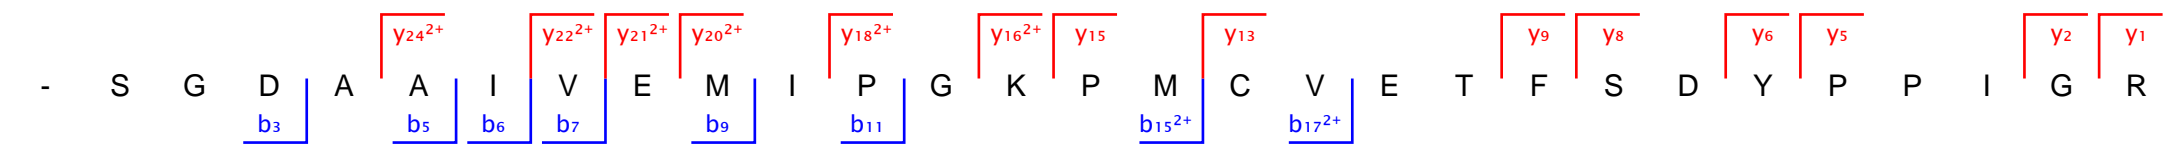

Spectral Annotation for Single-Peptide IDs in 16-cell Embryo using Q-OT-LIT

Raw file 2015-01-05\_CL03\_XenEmb\_x2 Scan 35221 Method ITMS; HCD Score 65.88 m/z 976.5

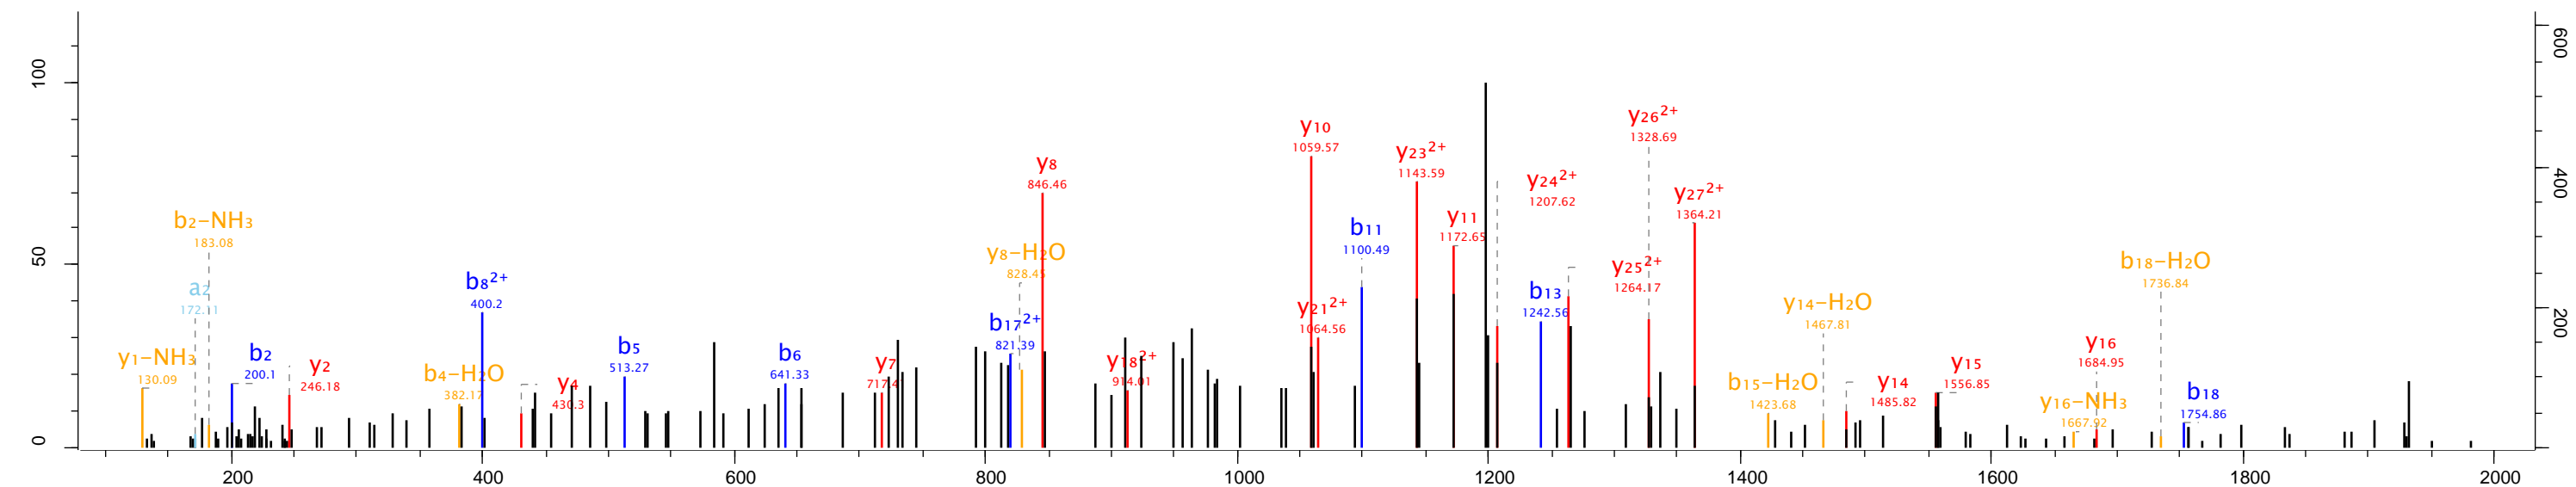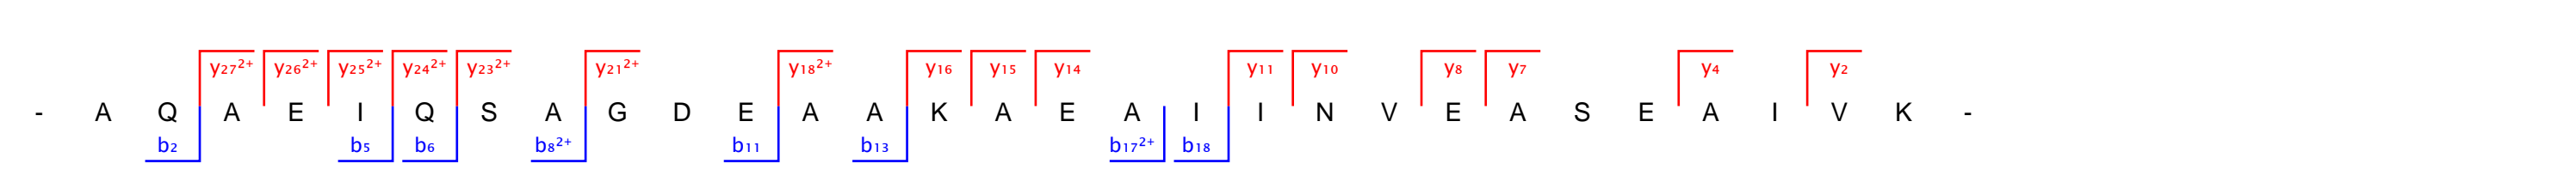

Raw file 2015-01-05\_CL03\_XenEmb\_x2 Scan 35227 Method ITMS; HCD Score 57.05 m/z 1013.82

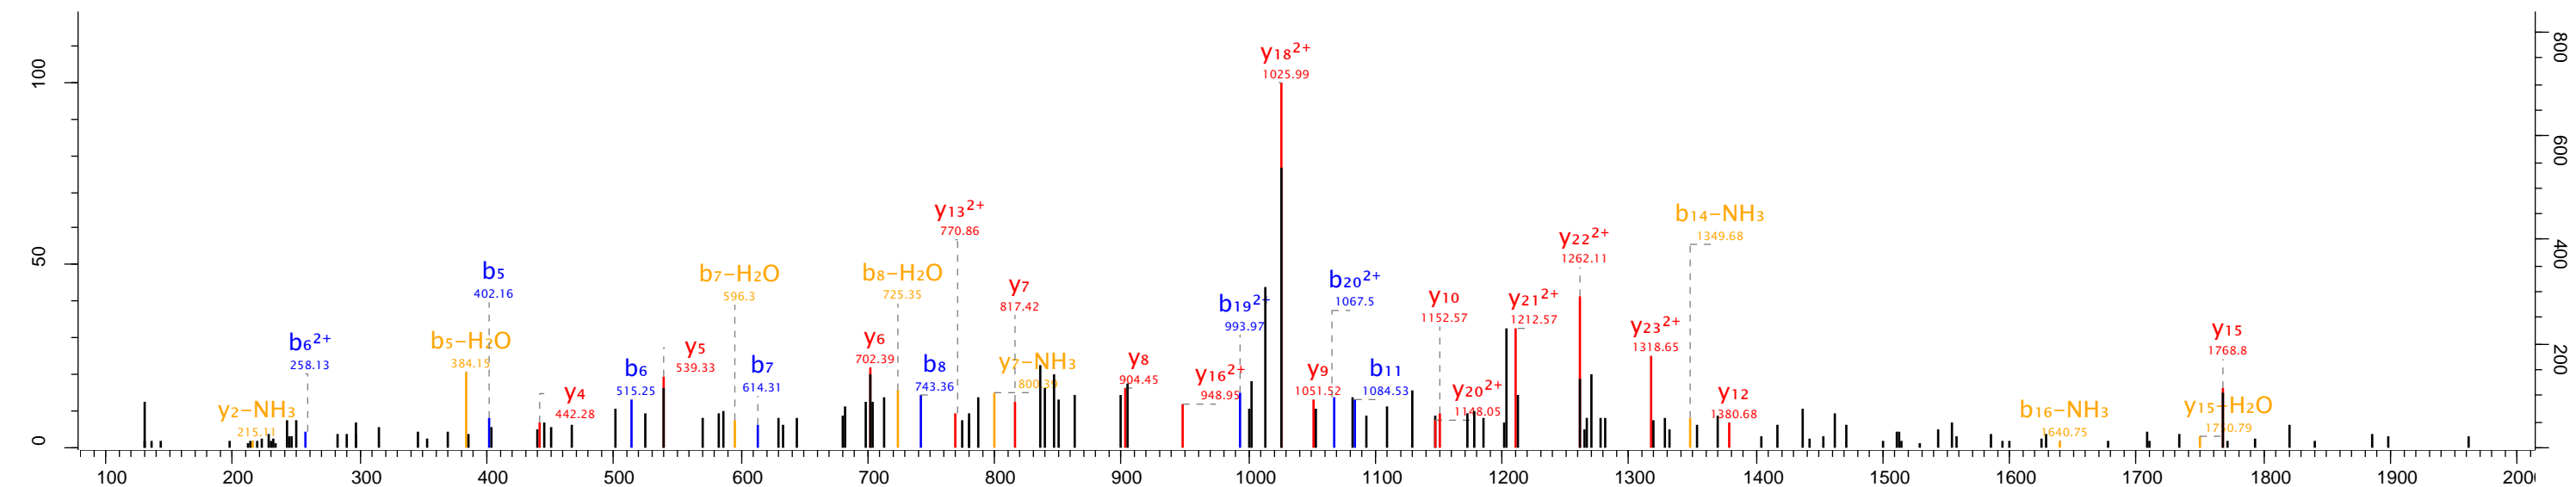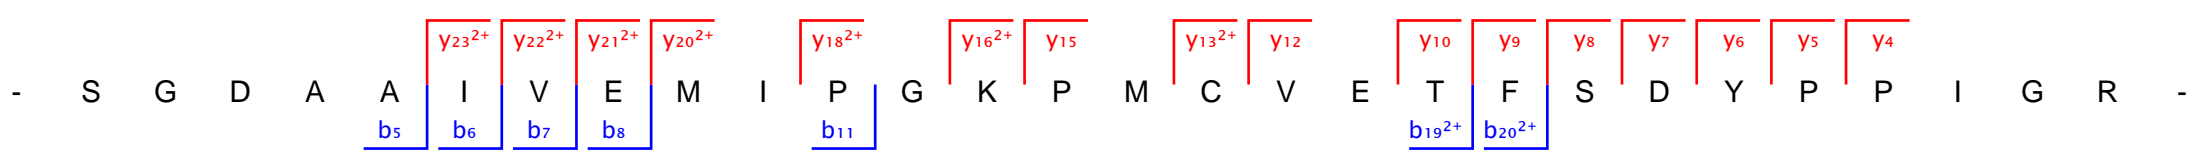

Raw file 2015-01-05\_CL03\_XenEmb\_x2 Scan 35233 Method ITMS; HCD Score 101.51 m/z 976.5

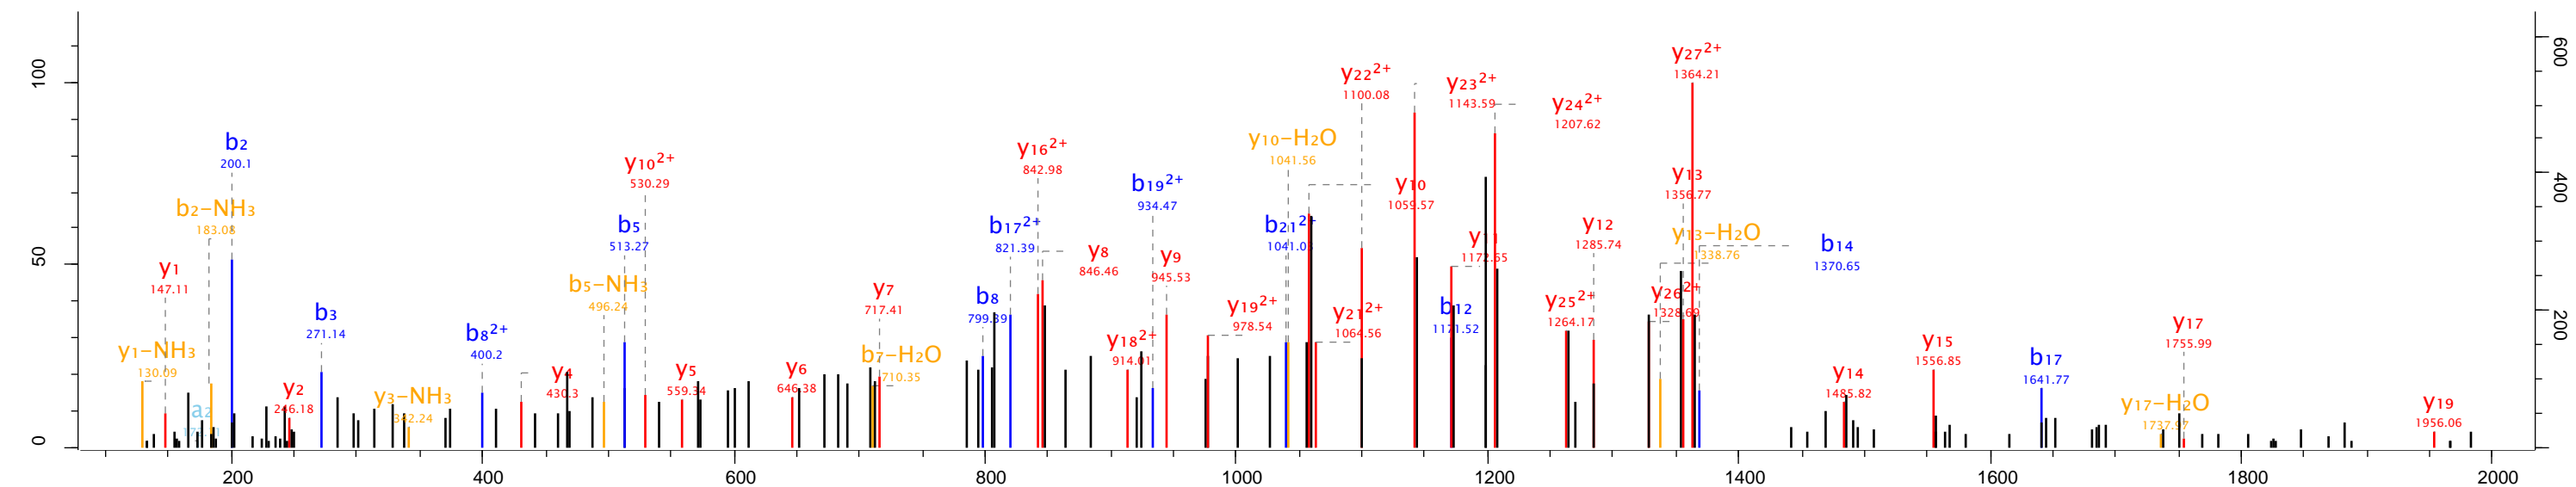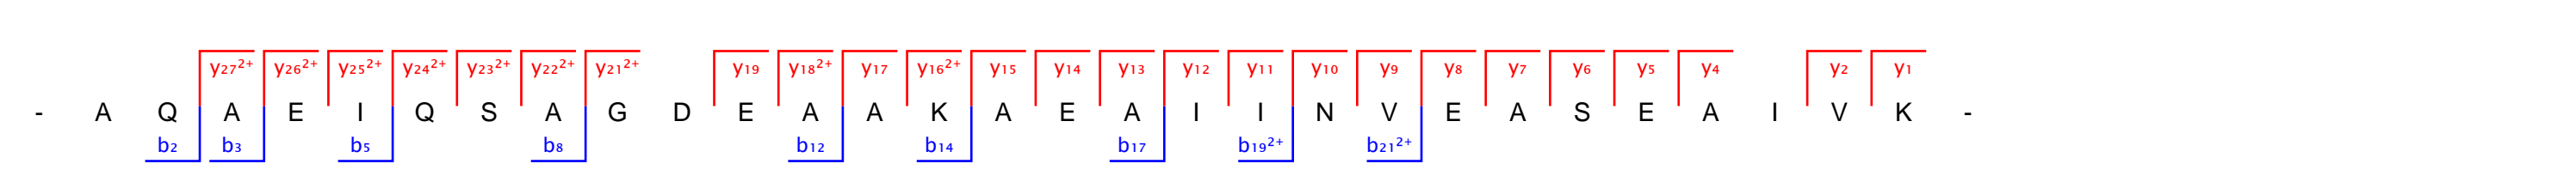

Raw file 2015-01-05\_CL03\_XenEmb\_x2 Scan 35243 Method ITMS; HCD Score 87.42 m/z 1013.49

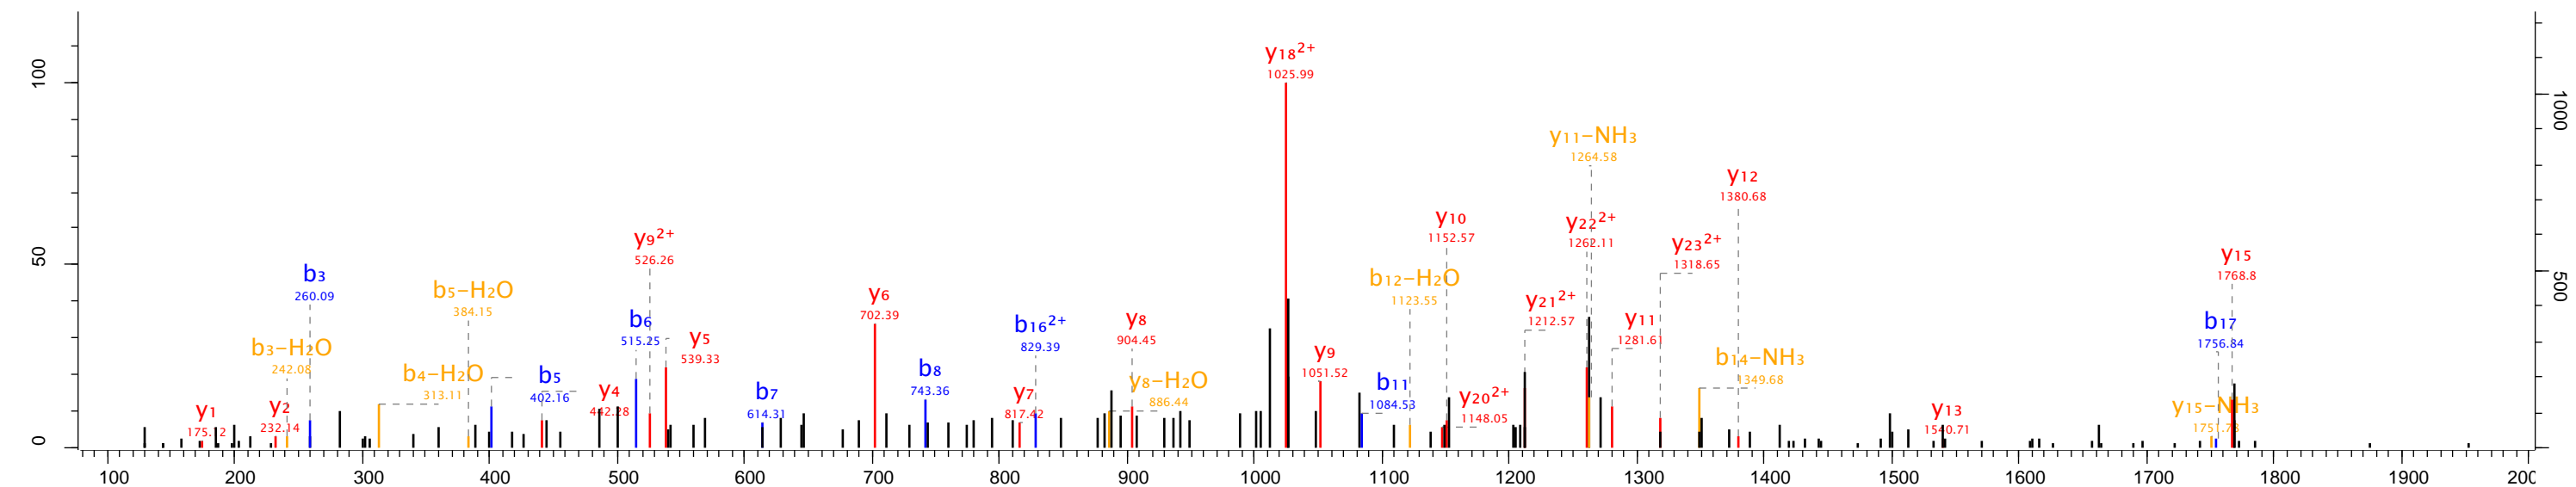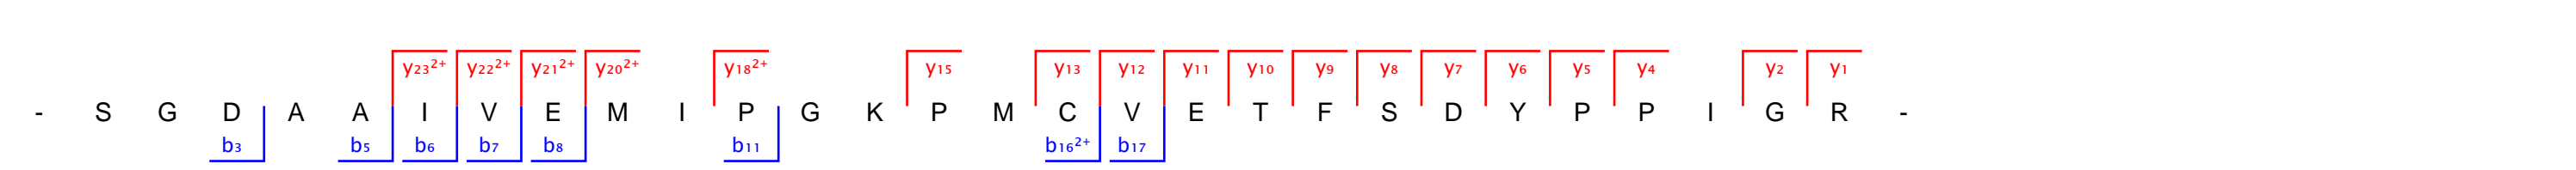



Raw file 2015-01-05\_CL03\_XenEmb\_x2 Scan 35274 Method ITMS; HCD Score 51.97 m/z 1013.82

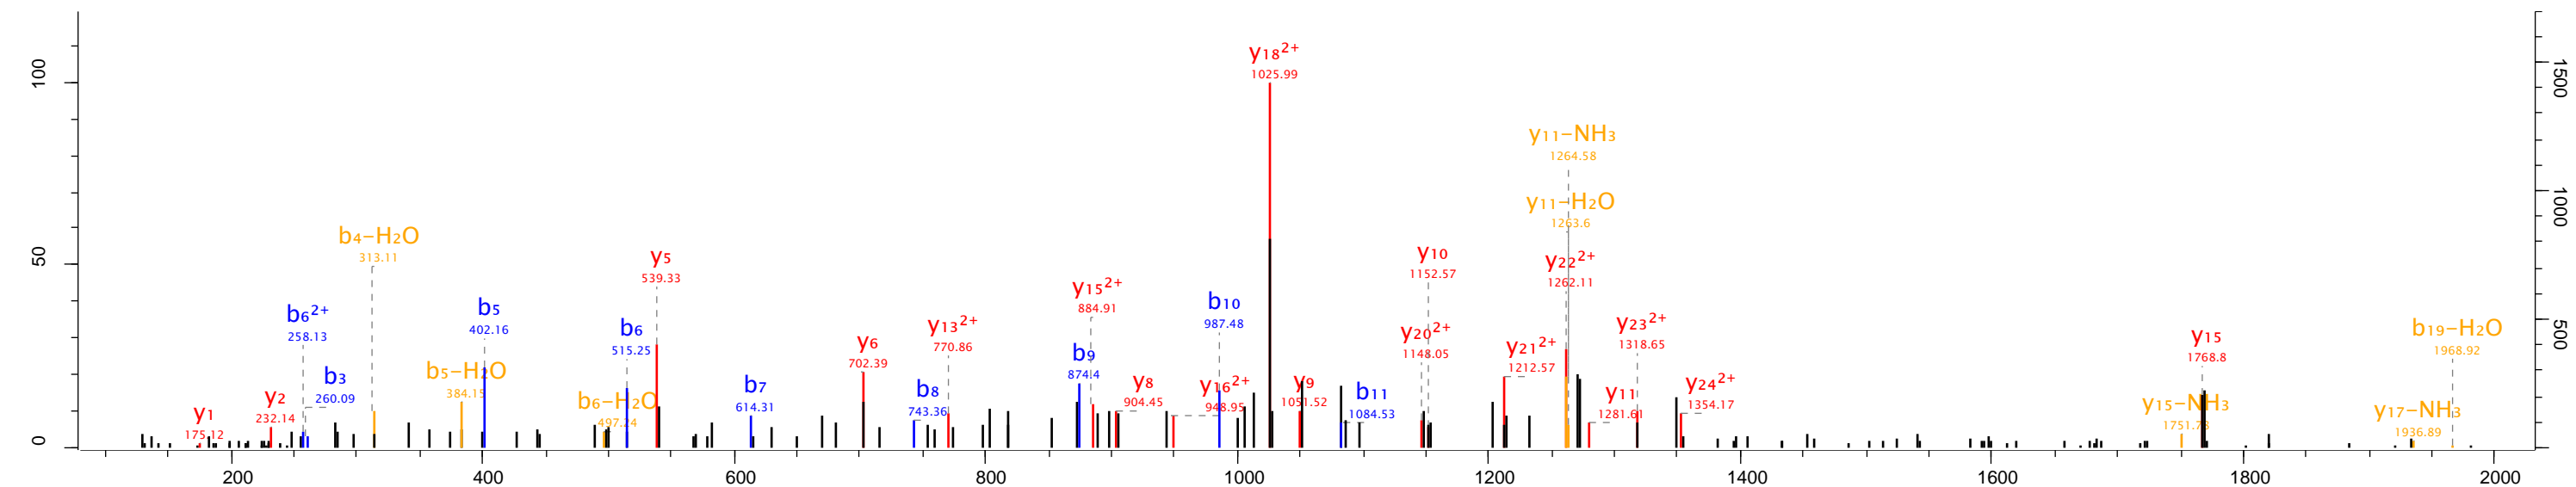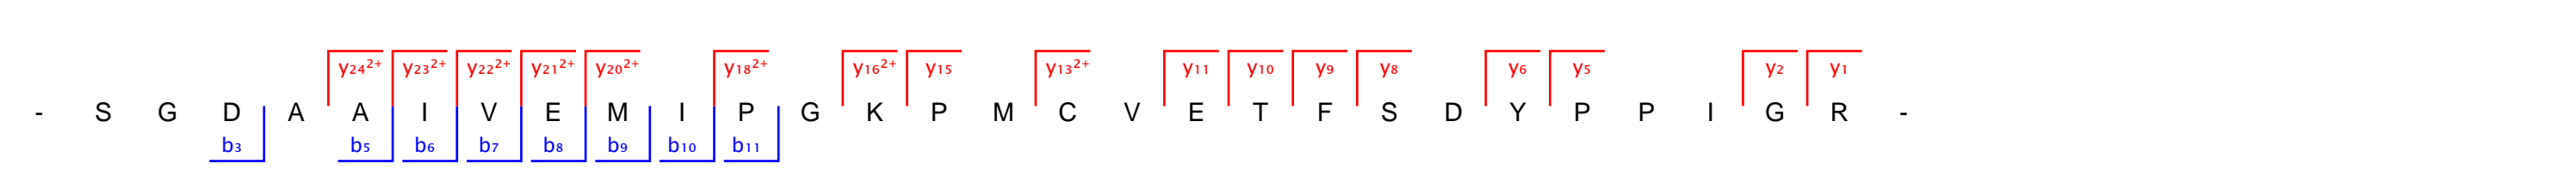

Raw file: 2015-01-05\_CL03\_XenEmb\_x2  
 Scan: 35287  
 Method: ITMS; HCD  
 Score: 40.41  
 m/z: 732.38

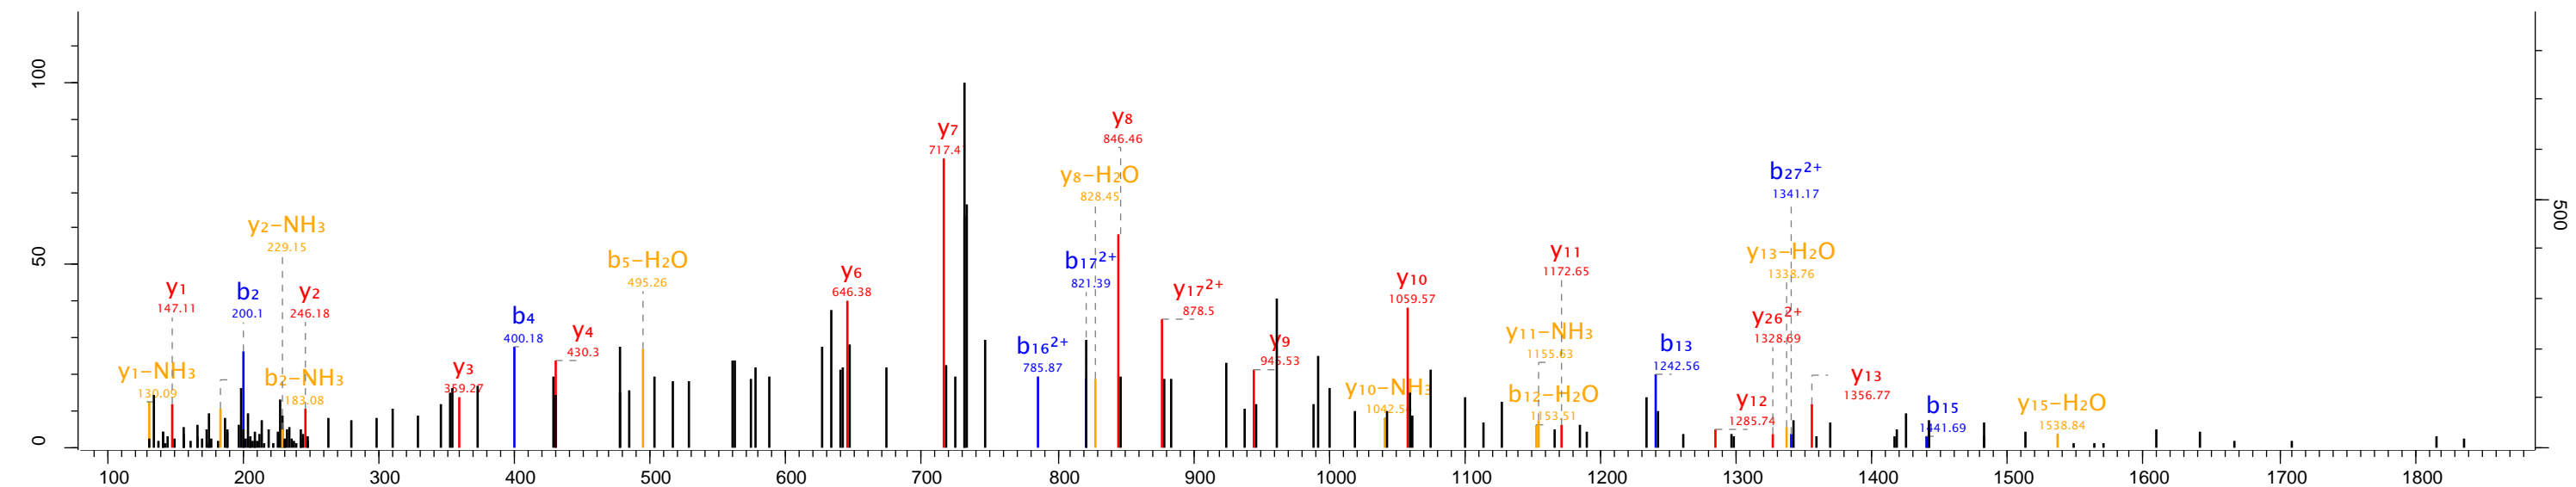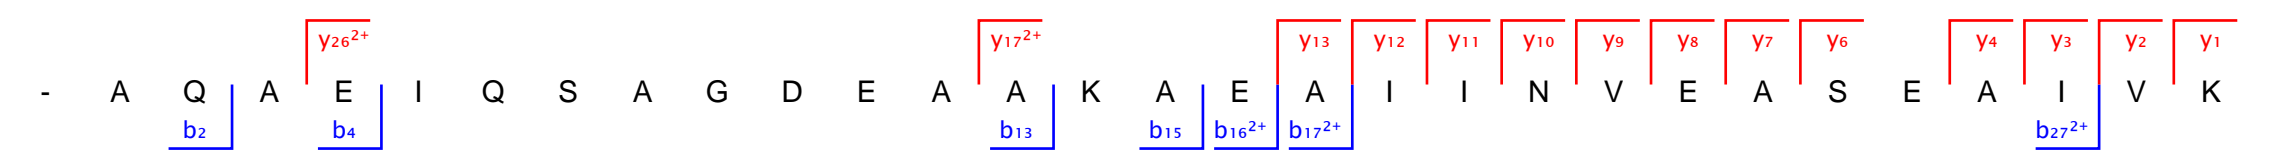

Spectral Annotation for Single-Peptide IDs in 16-cell Embryo using Q-OT-LIT

Raw file 2015-01-05\_CL03\_XenEmb\_x2 Scan 35393 Method ITMS; HCD Score 46.8 m/z 792.9

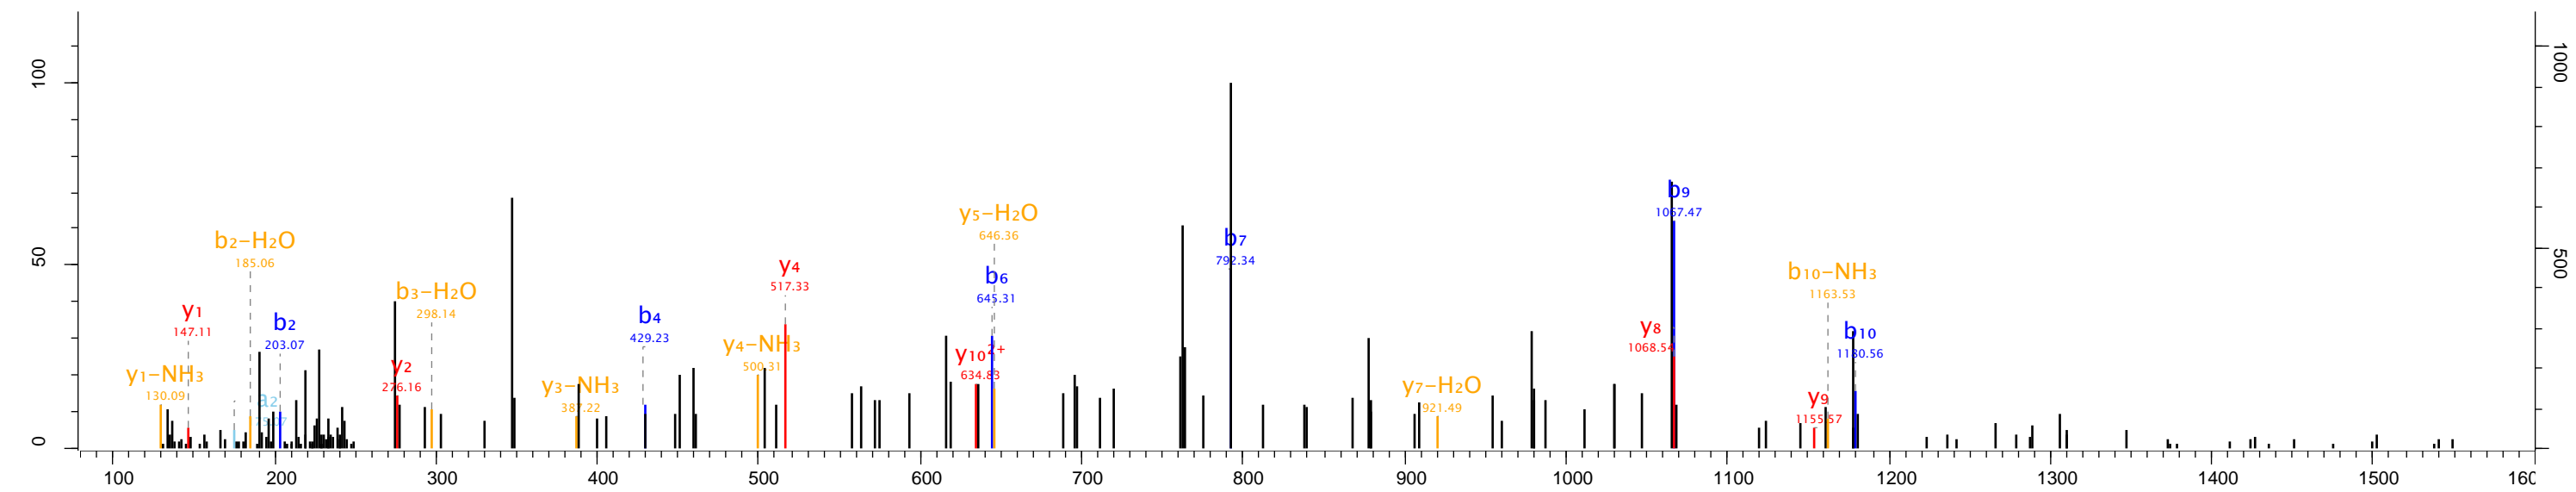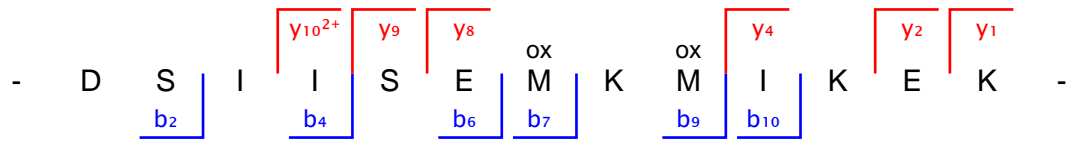

Raw file: 2015-01-05\_CL03\_XenEmb\_x2  
 Scan: 35407 Method: ITMS; HCD Score: 46.8 m/z: 792.4

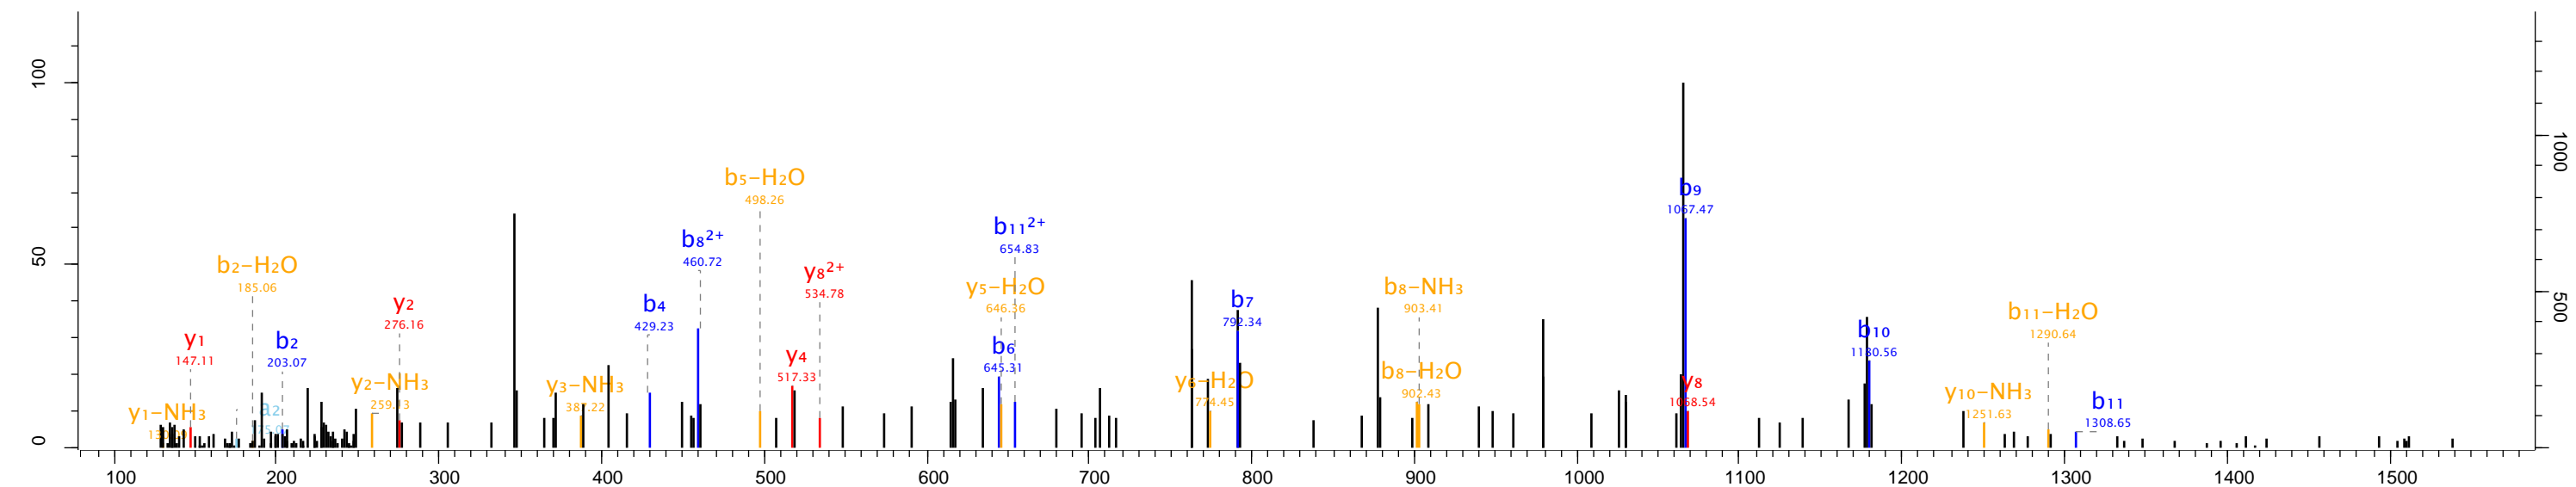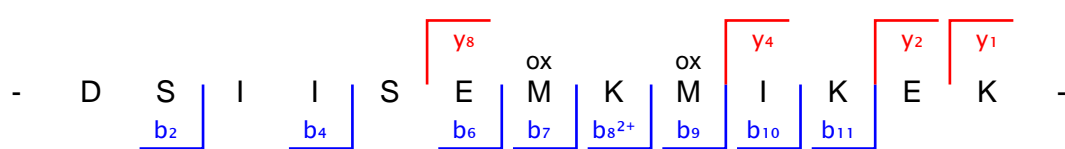

Spectral Annotation for Single-Peptide IDs in 16-cell Embryo using Q-OT-LIT

Raw file: 2015-01-05\_CL03\_XenEmb\_x2  
 Scan: 35417 Method: ITMS; HCD Score: 65.89 m/z: 976.5

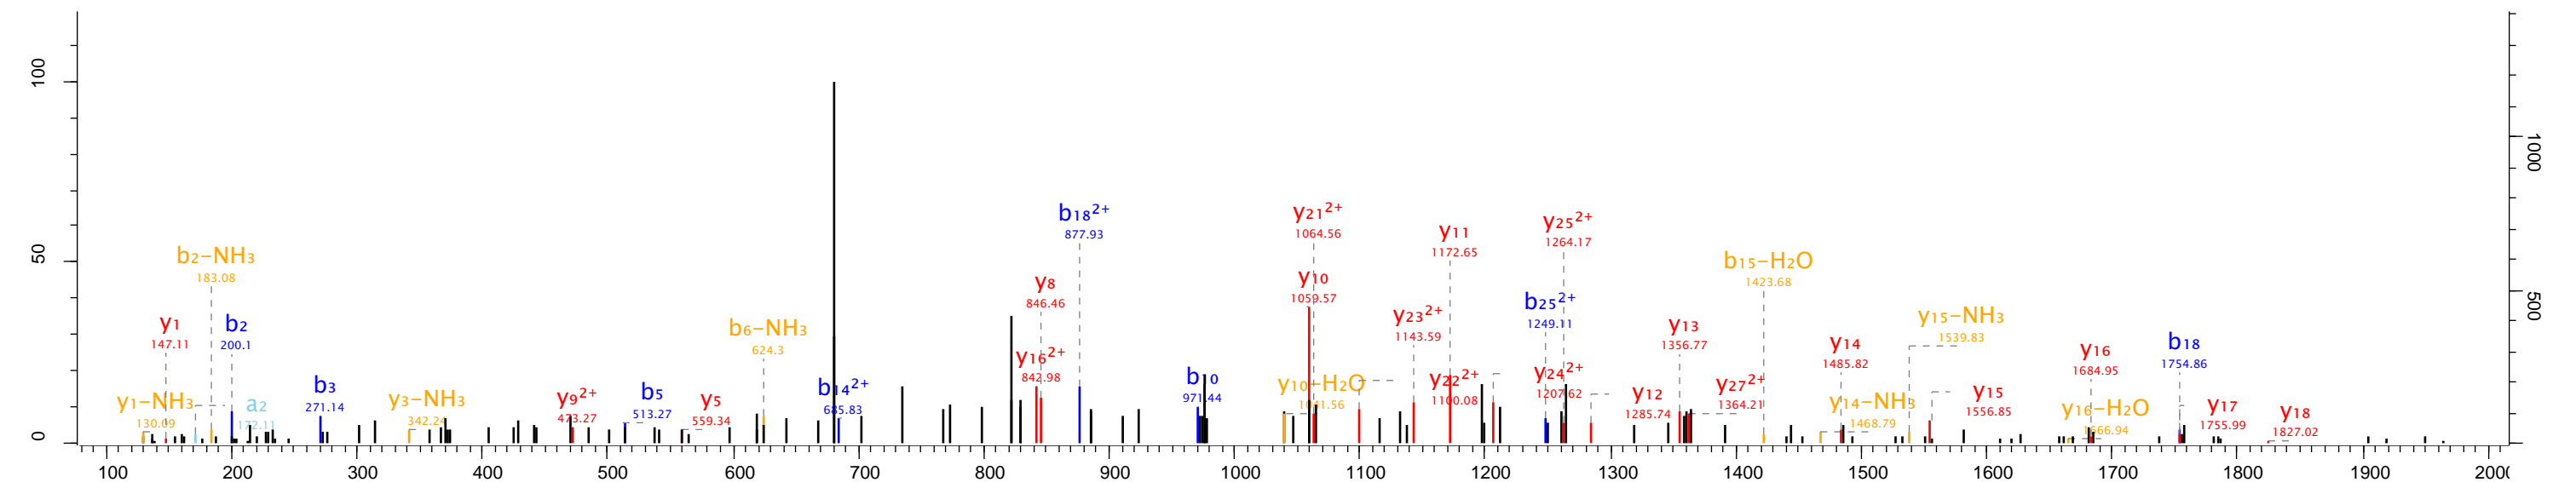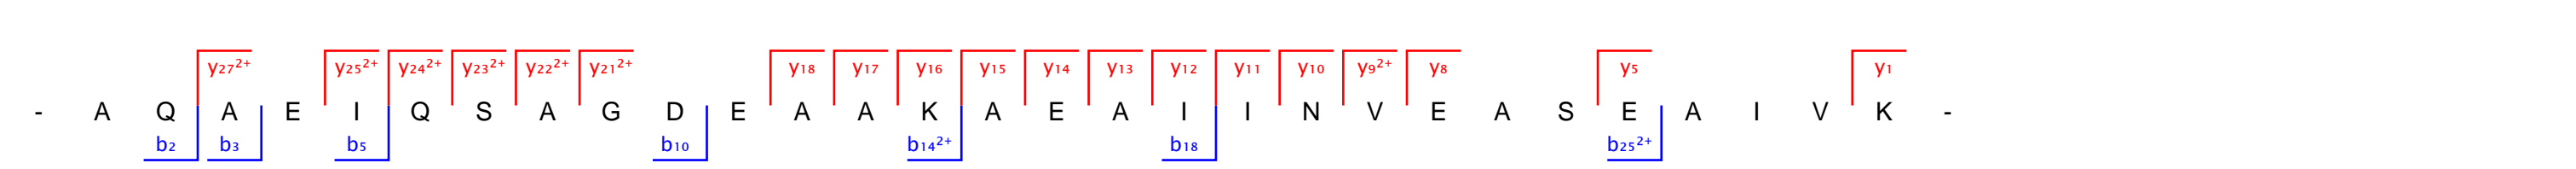

Raw file 2015-01-05\_CL03\_XenEmb\_x2 Scan 35455 Method ITMS; HCD Score 48.51 m/z 1008.81

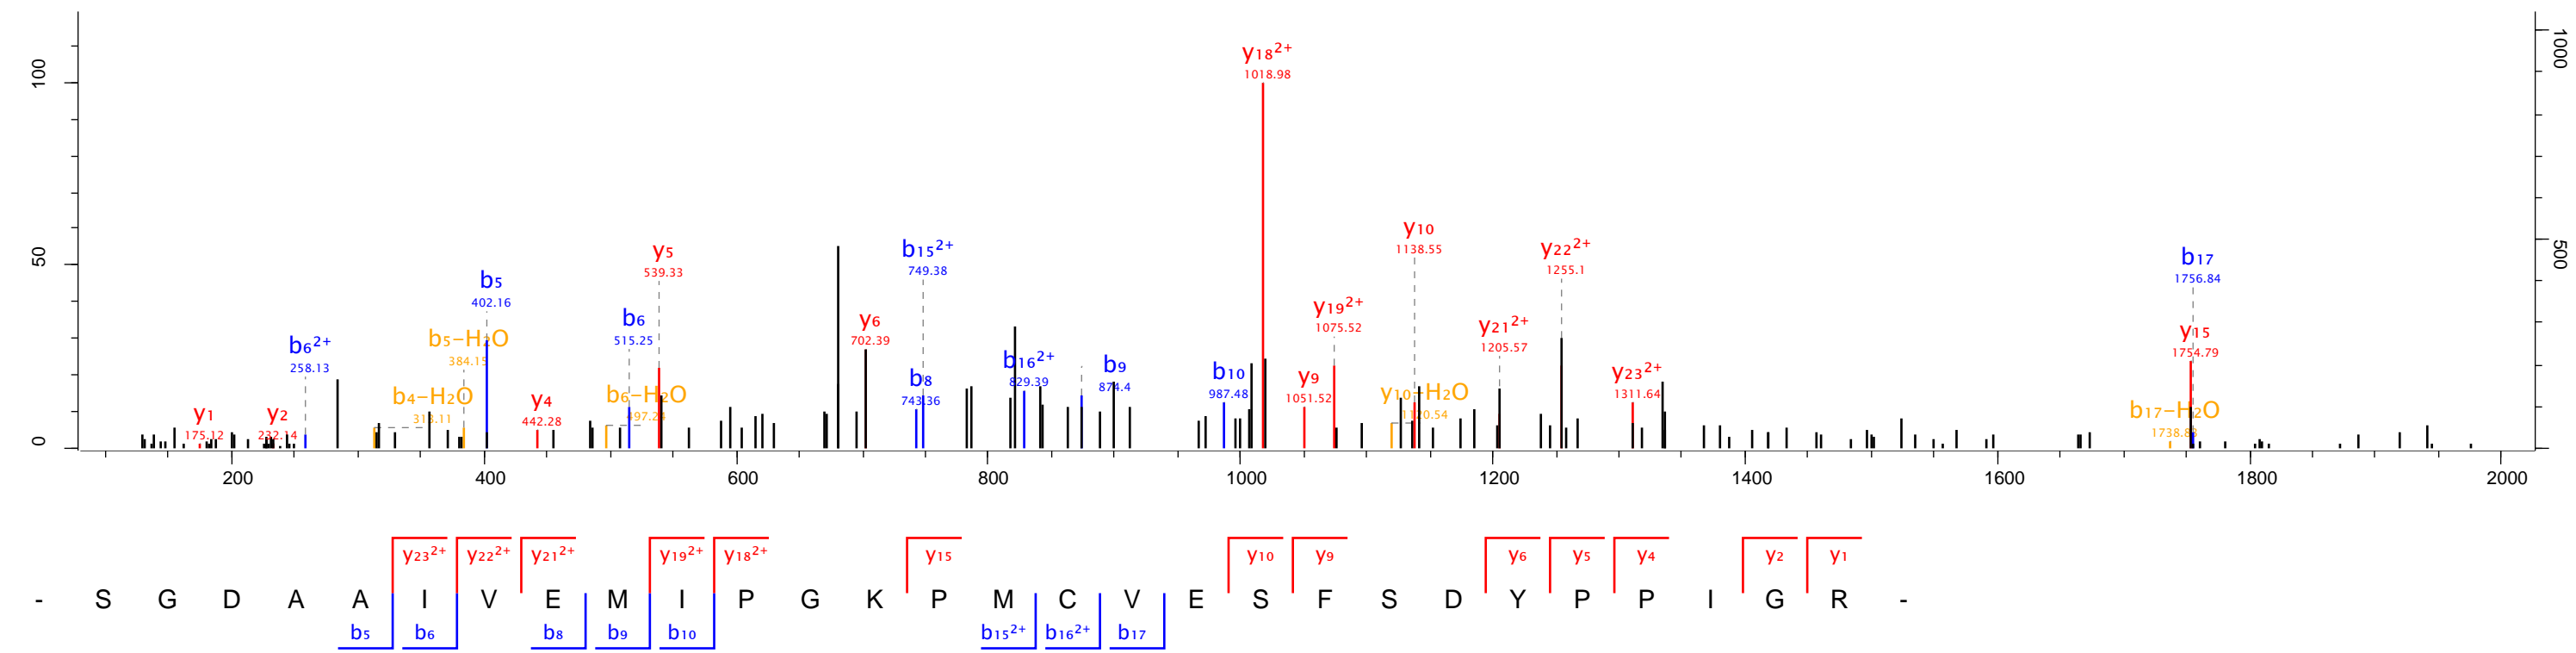

Spectral Annotation for Single-Peptide IDs in 16-cell Embryo using Q-OT-LIT

C. Lombard-Banek, S. Reddy, S. A. Moody, P. Nemes, Mol. Cell. Prot. 2016

Raw file 2015-01-05\_CL03\_XenEmb\_x2 Scan 35484 Method ITMS; HCD Score 40.62 m/z 1008.81

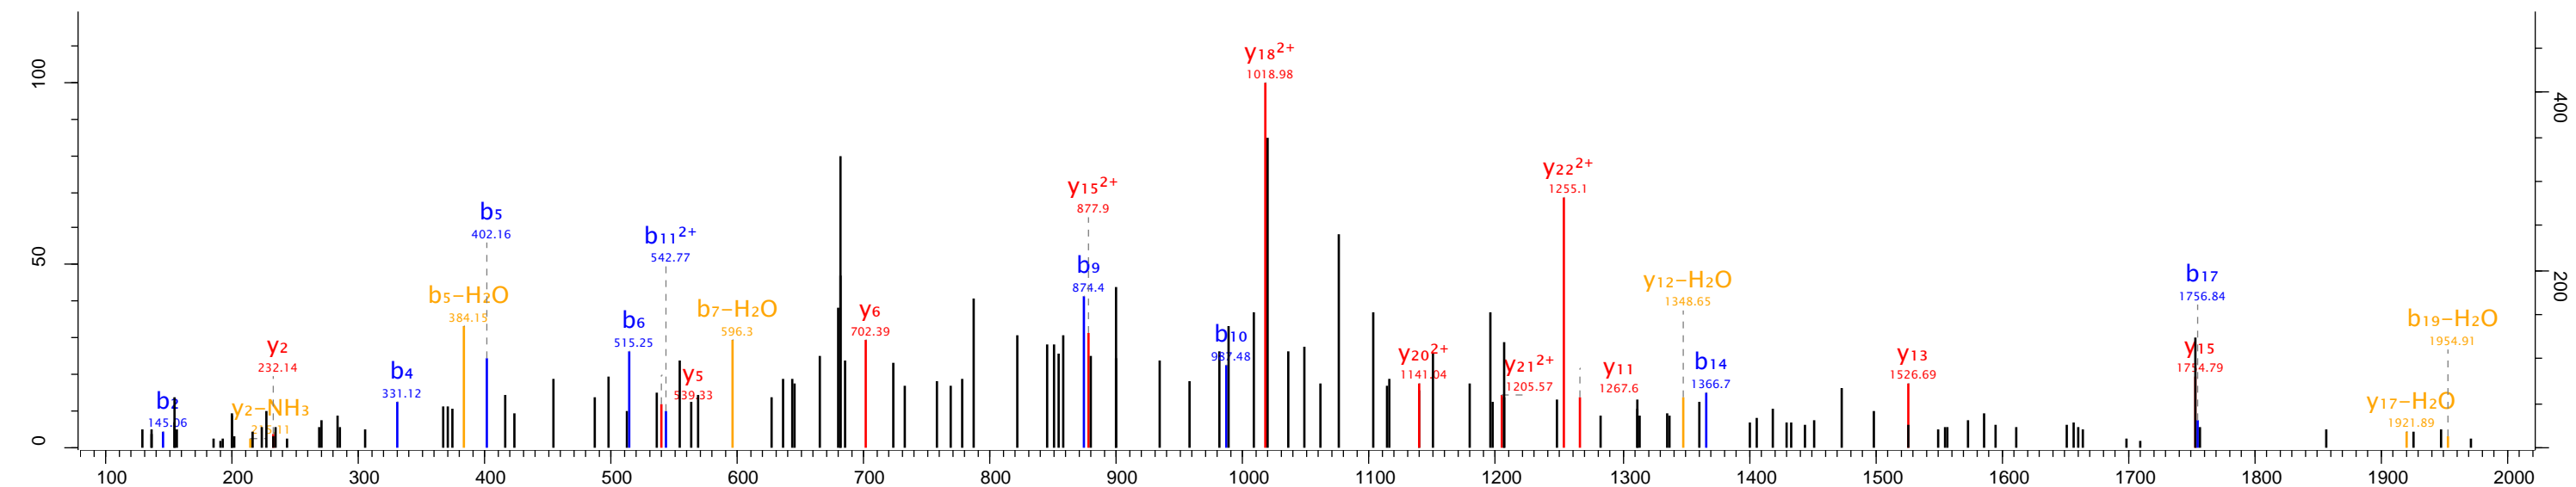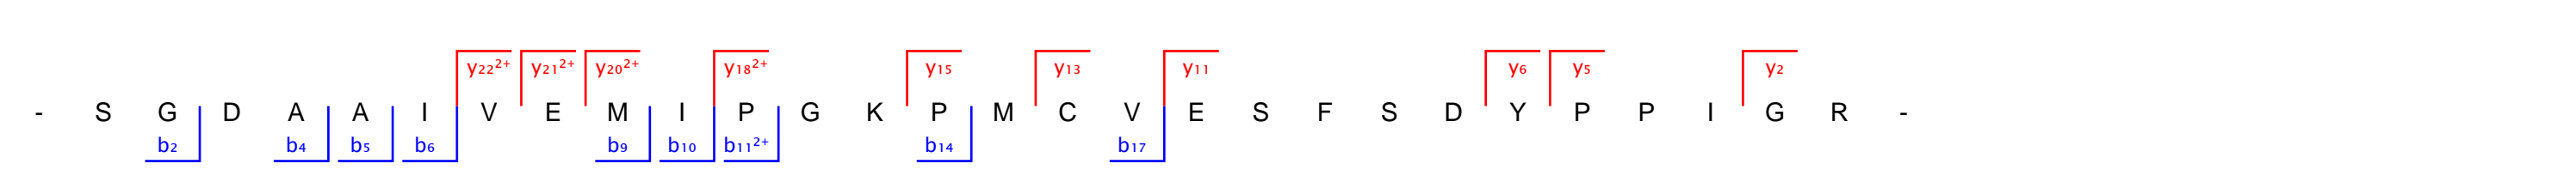

Raw file: 2015-01-05\_CL03\_XenEmb\_x2  
 Scan: 35508 Method: ITMS; HCD Score: 66.57 m/z: 801.42

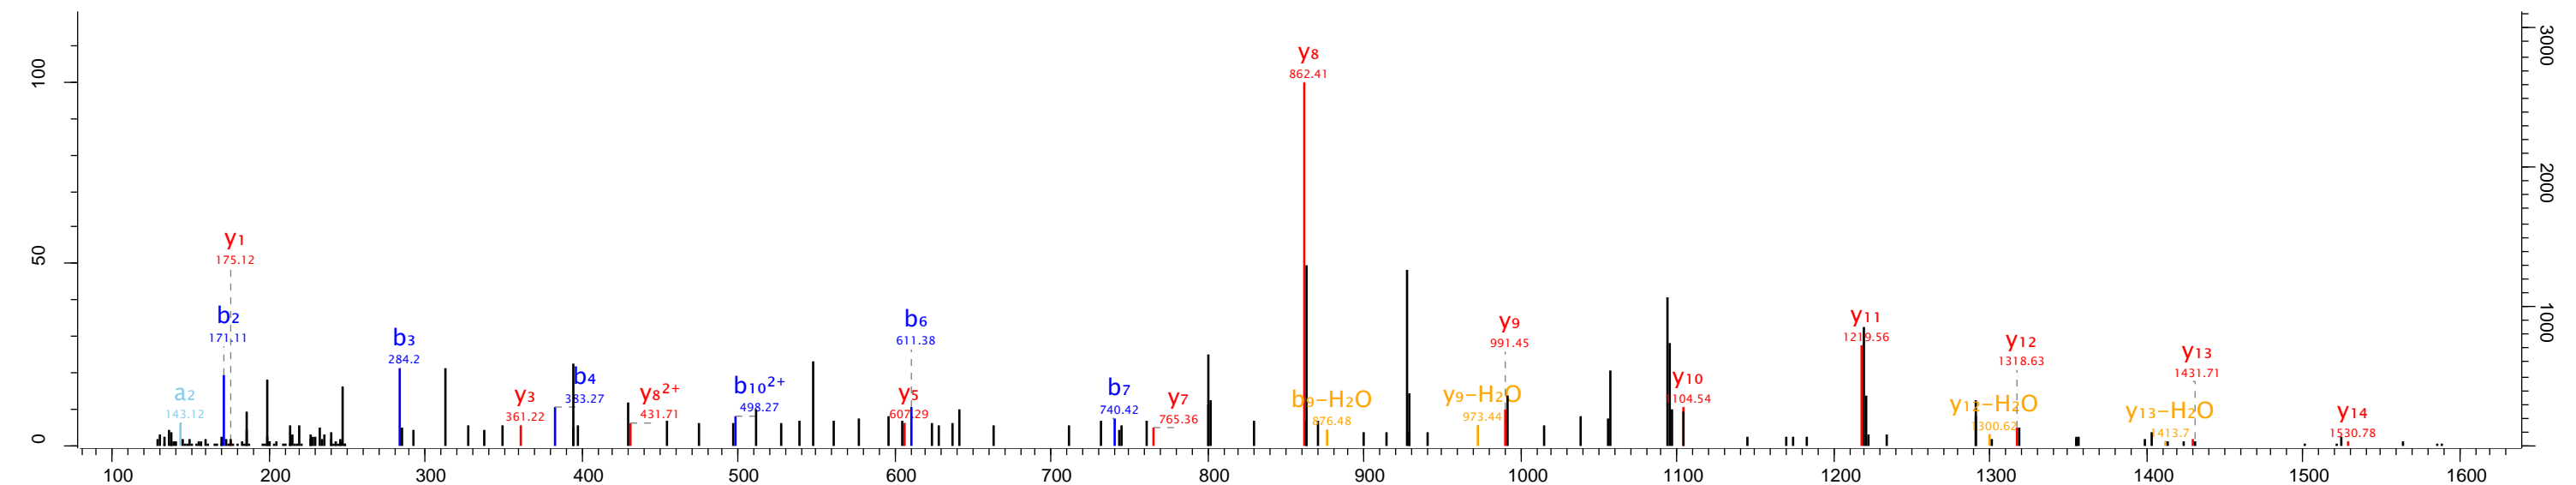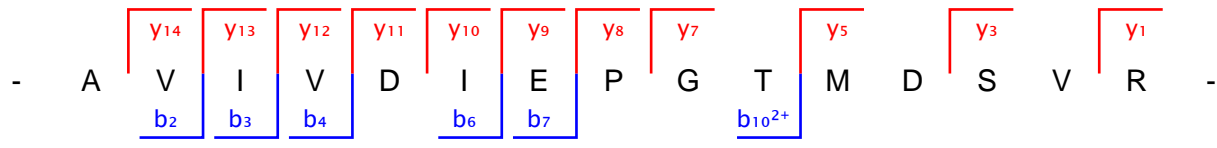

Spectral Annotation for Single-Peptide IDs in 16-cell Embryo using Q-OT-LIT



Raw file: 2015-01-05\_CL03\_XenEmb\_x2  
 Scan: 35562  
 Method: ITMS; HCD  
 Score: 62.65  
 m/z: 1013.82

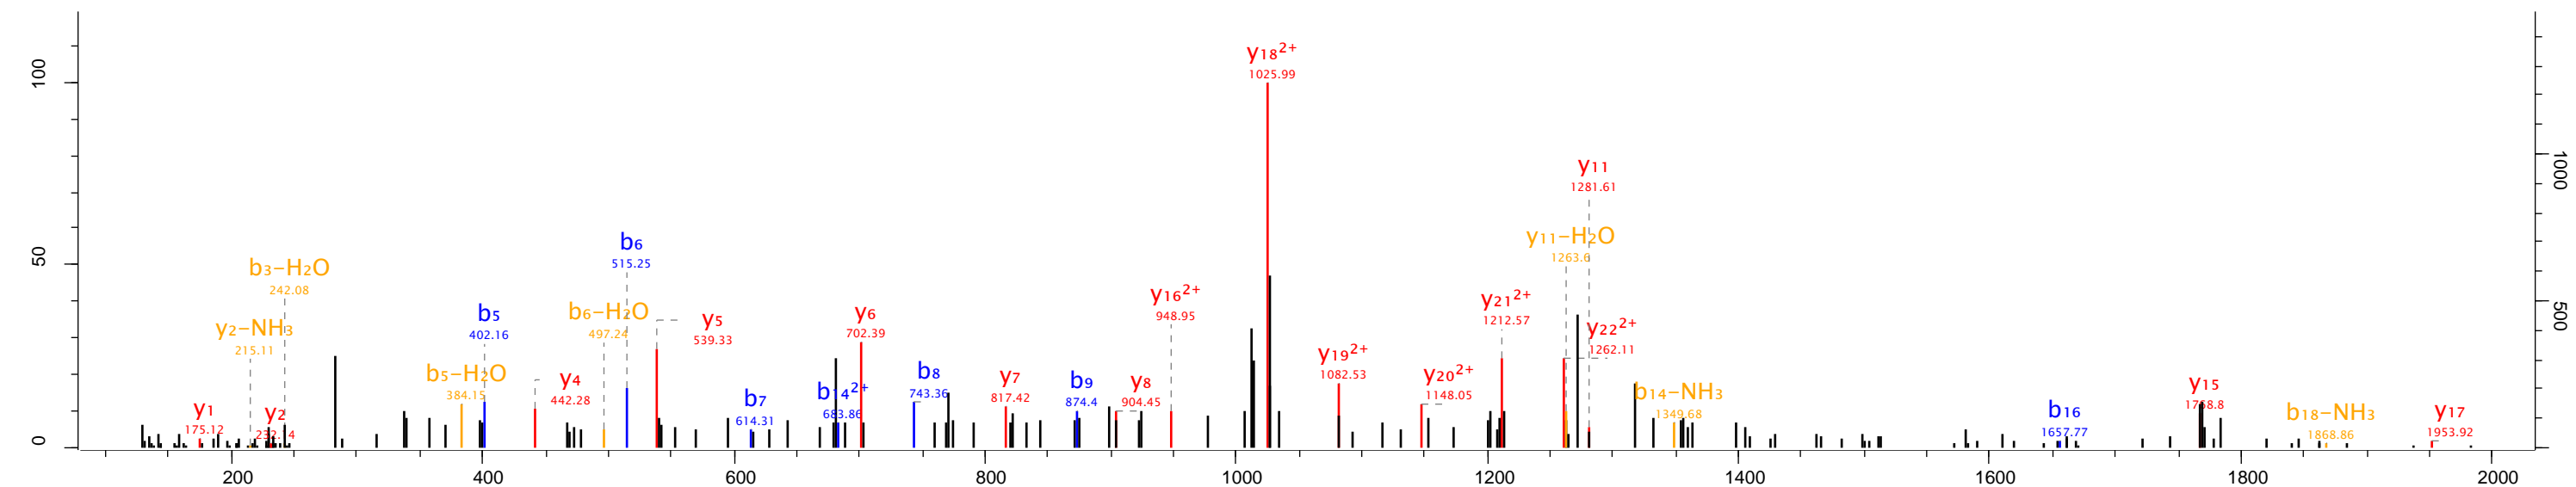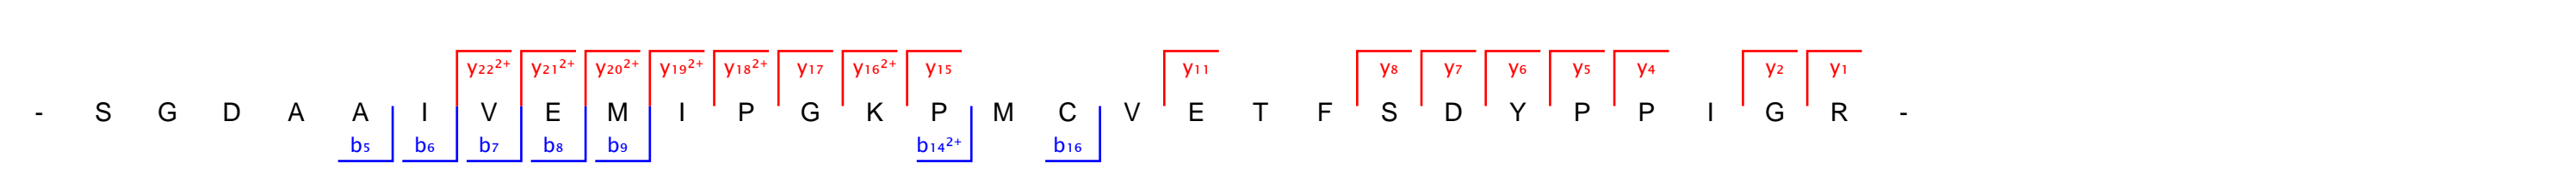

Raw file: 2015-01-05\_CL03\_XenEmb\_x2  
 Scan: 35602  
 Method: ITMS; HCD  
 Score: 90.85  
 m/z: 846.43

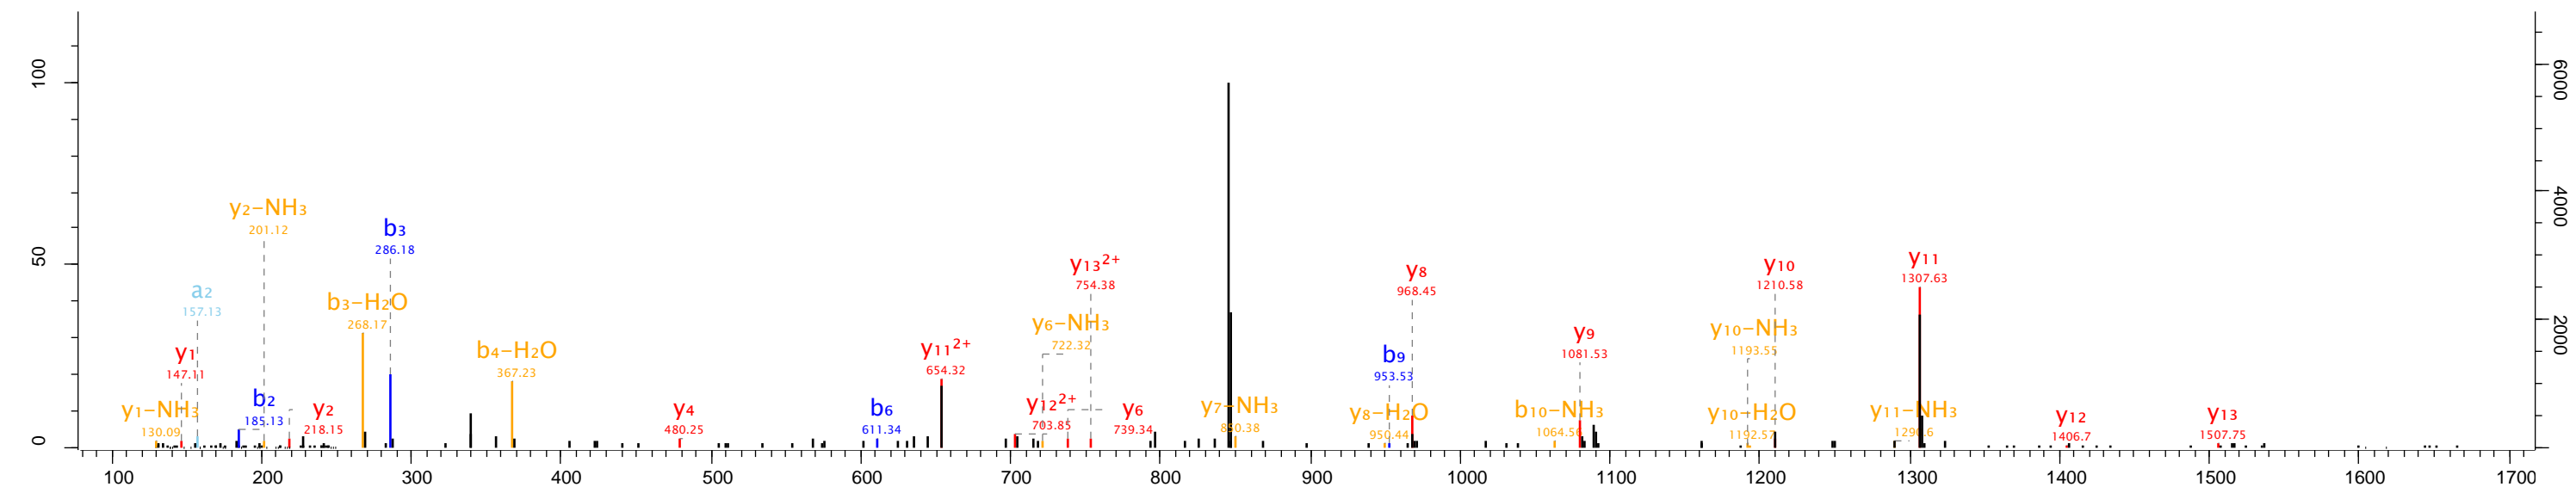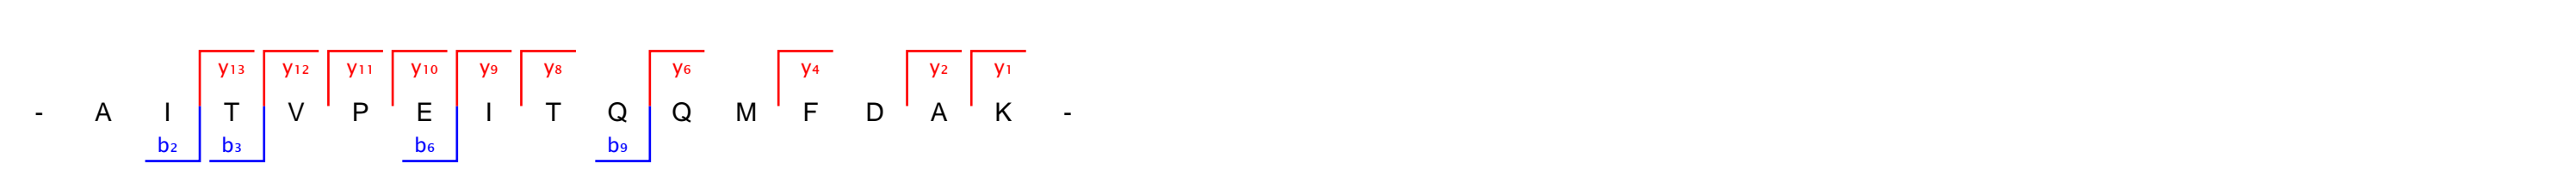

Raw file 2015-01-05\_CL03\_XenEmb\_x2 Scan 35610 Method ITMS; HCD Score 32.51 m/z 983.16

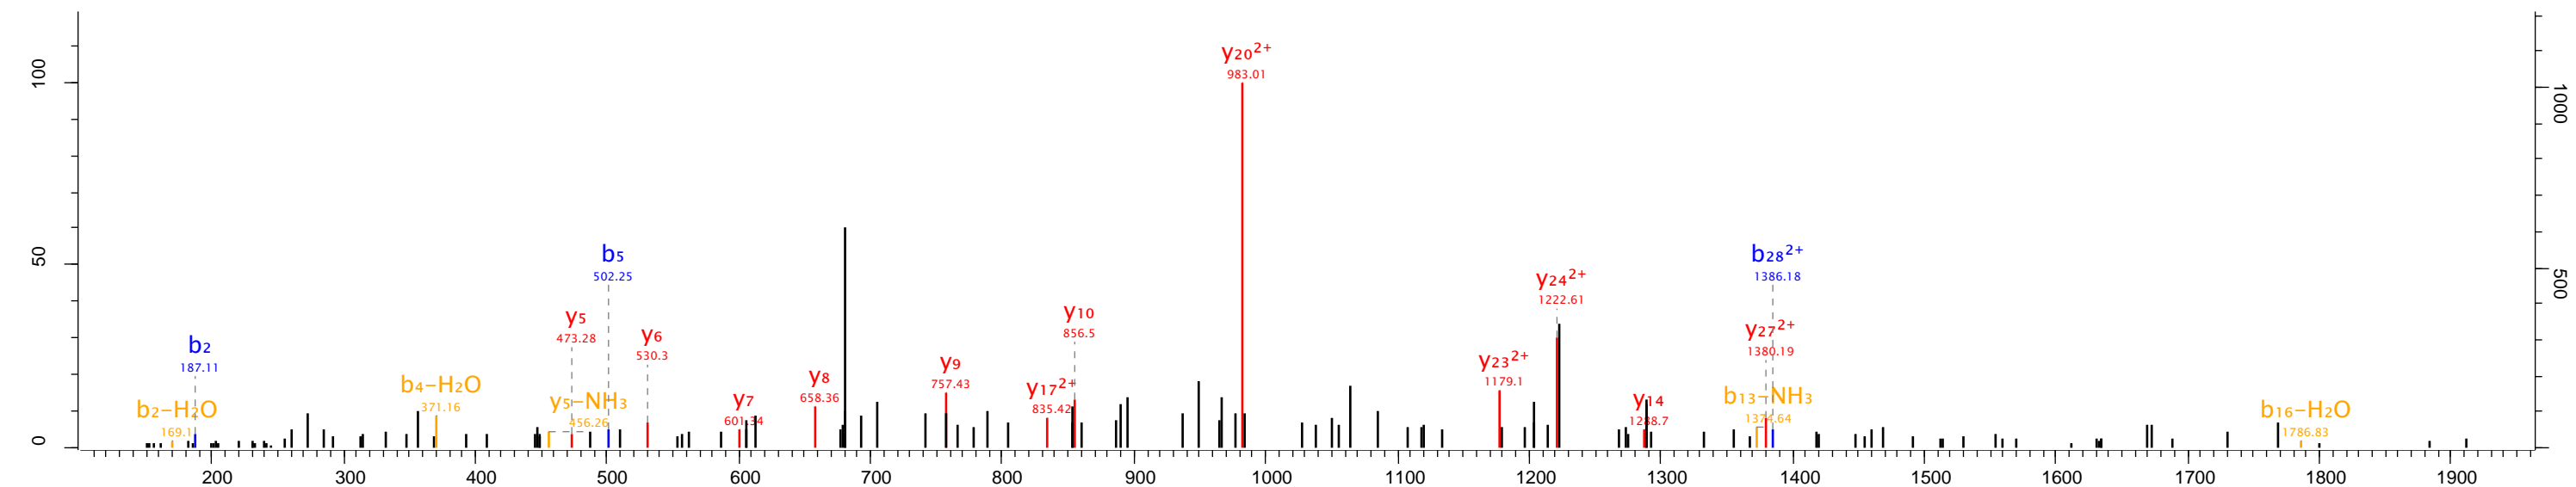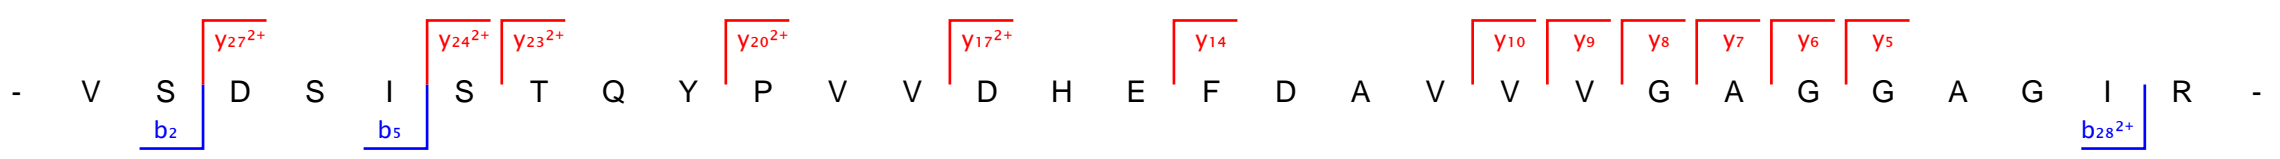

Raw file: 2015-01-05\_CL03\_XenEmb\_x2  
 Scan: 35617 Method: ITMS; HCD Score: 89.26 m/z: 534.97

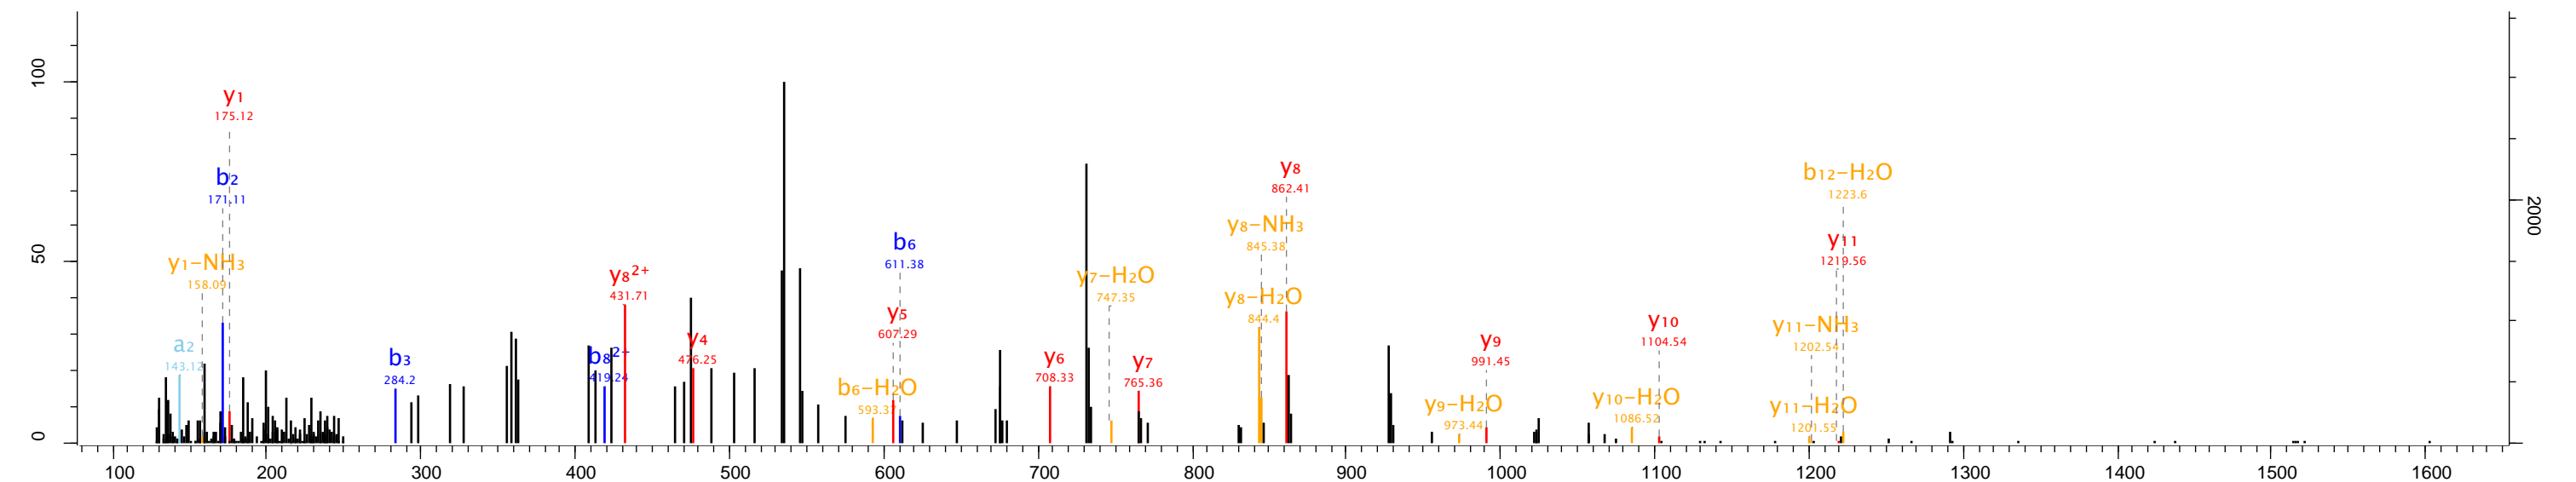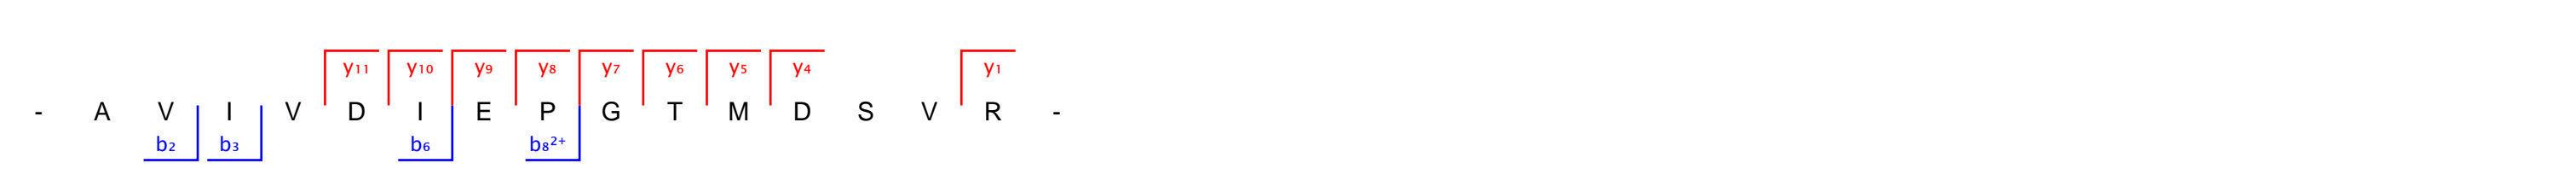

Raw file 2015-01-05\_CL03\_XenEmb\_x2 Scan 35664 Method ITMS; HCD Score 49.77 m/z 1032.47

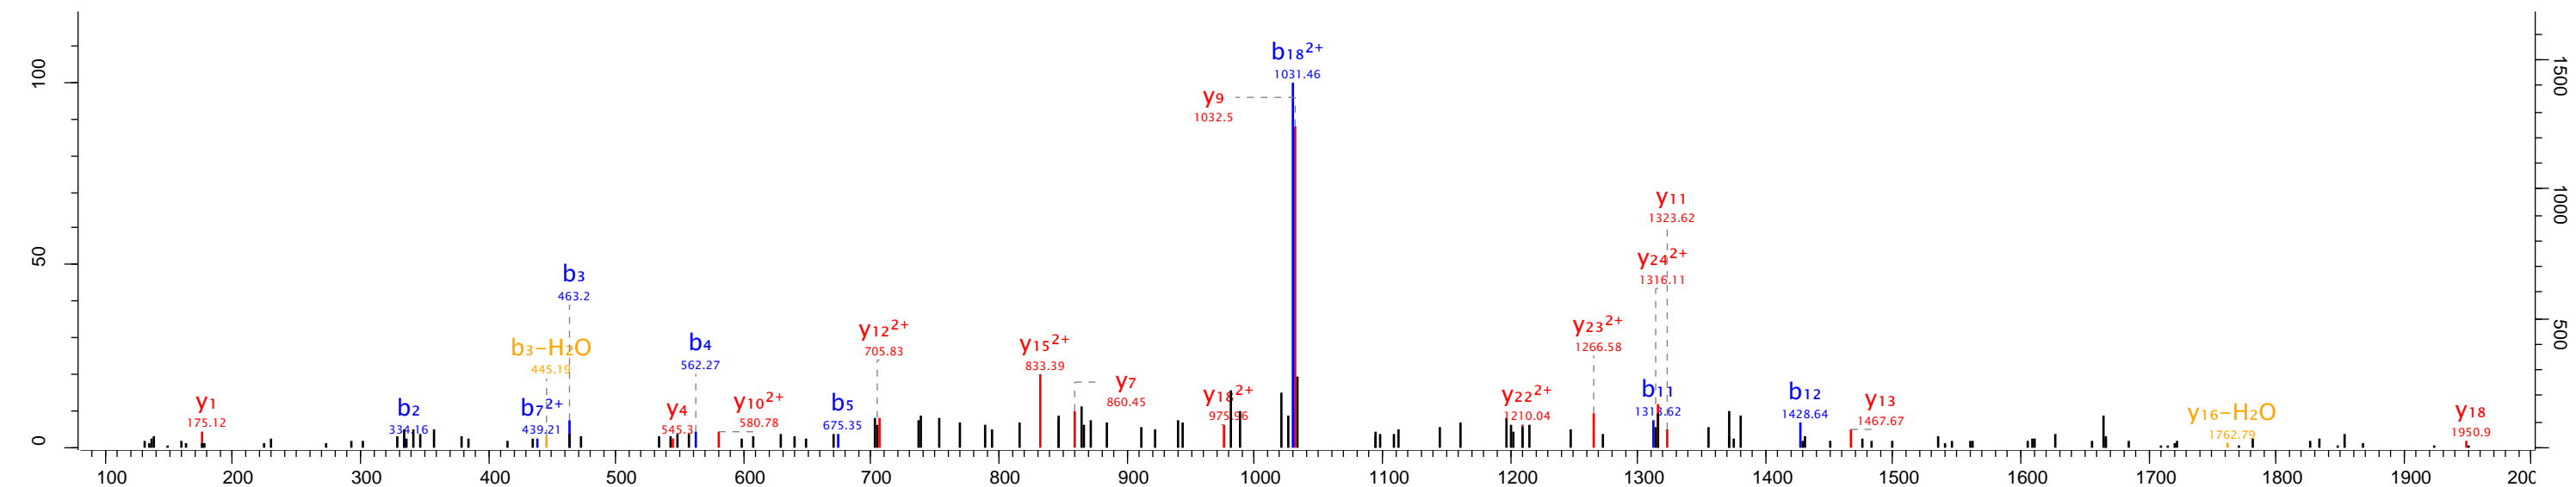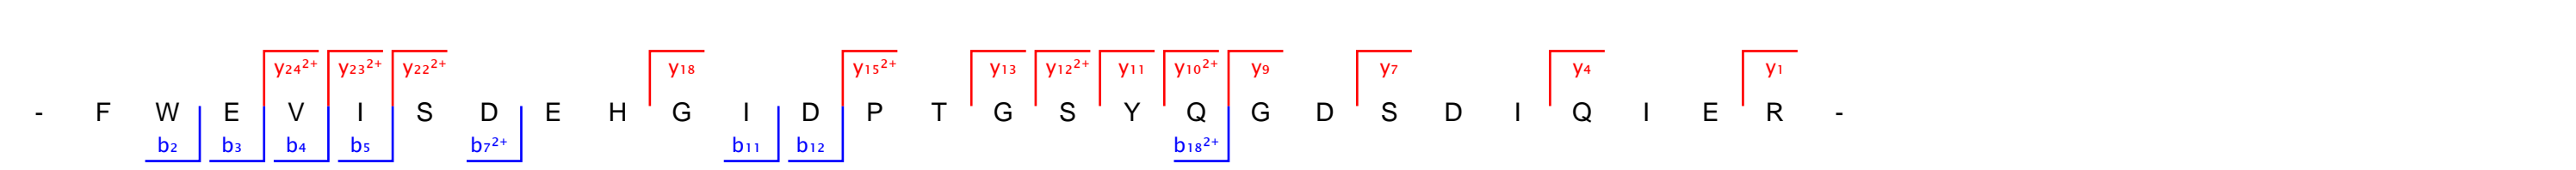

Raw file: 2015-01-05\_CL03\_XenEmb\_x2  
 Scan: 35755 Method: ITMS; HCD Score: 62.29 m/z: 846.43

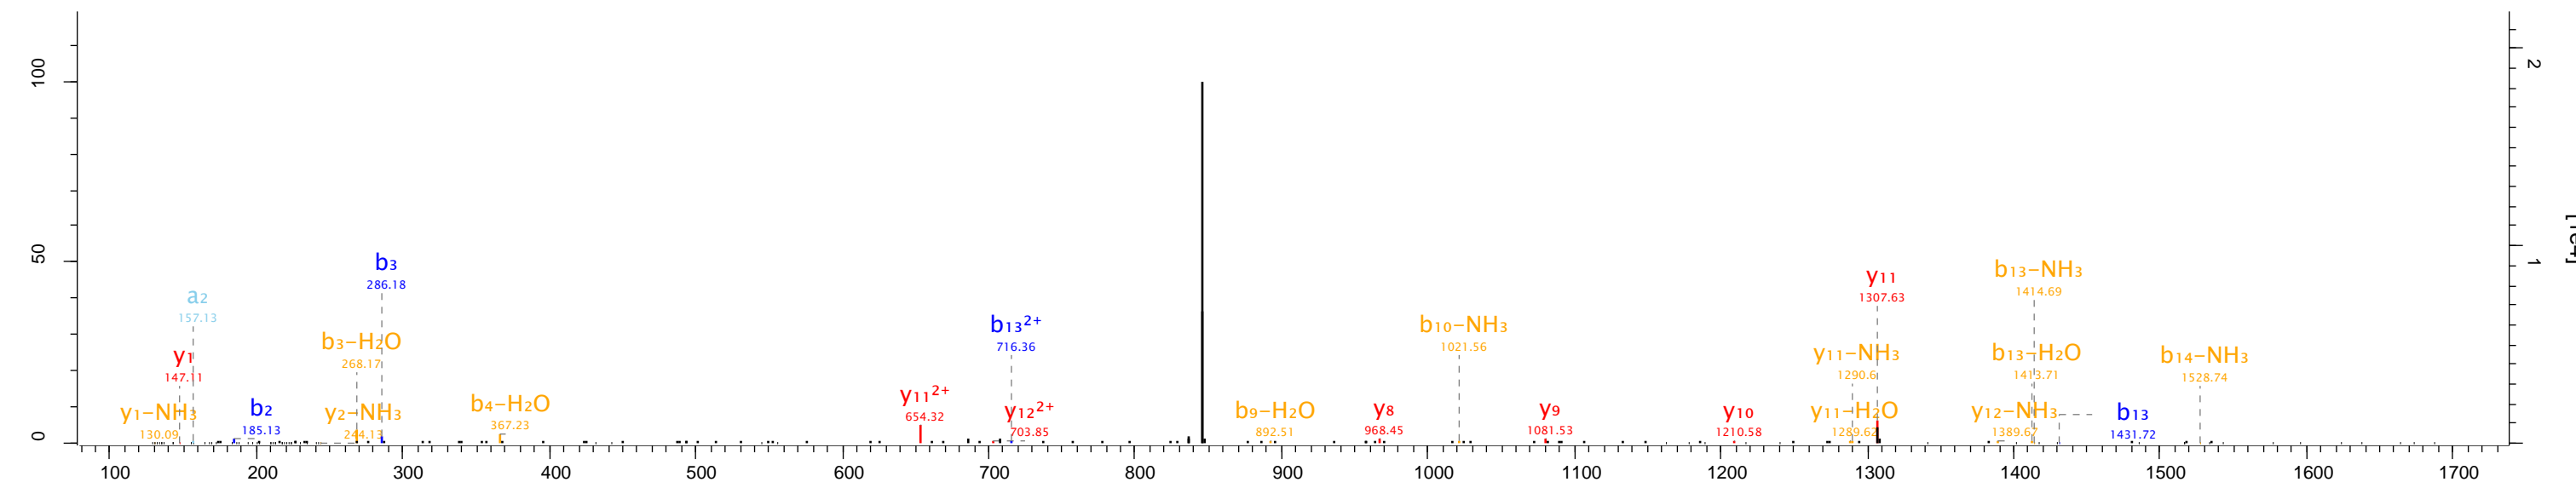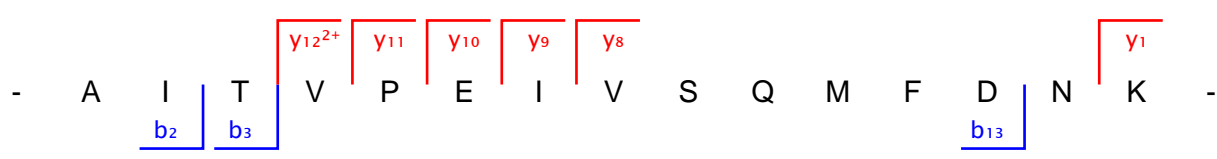

Raw file 2015-01-05\_CL03\_XenEmb\_x2 Scan 36210 Method ITMS; HCD Score 45.04 m/z 1193.29

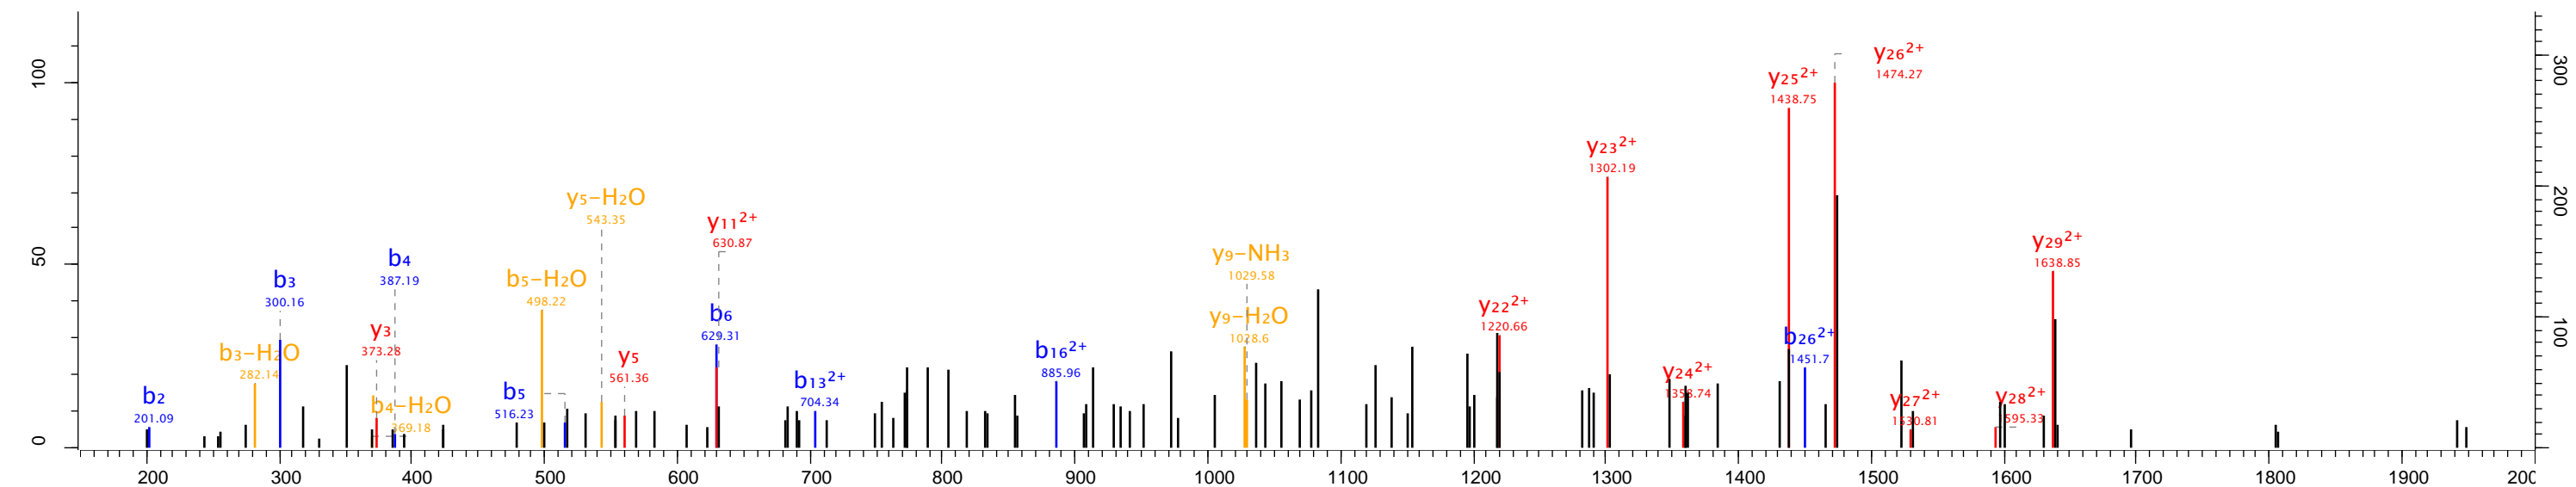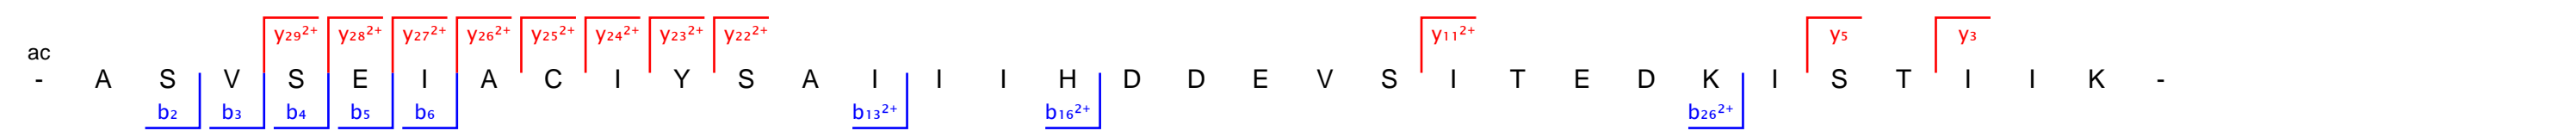

Raw file: 2015-01-05\_CL03\_XenEmb\_x2  
 Scan: 36233 Method: ITMS; HCD Score: 97.24 m/z: 844.96

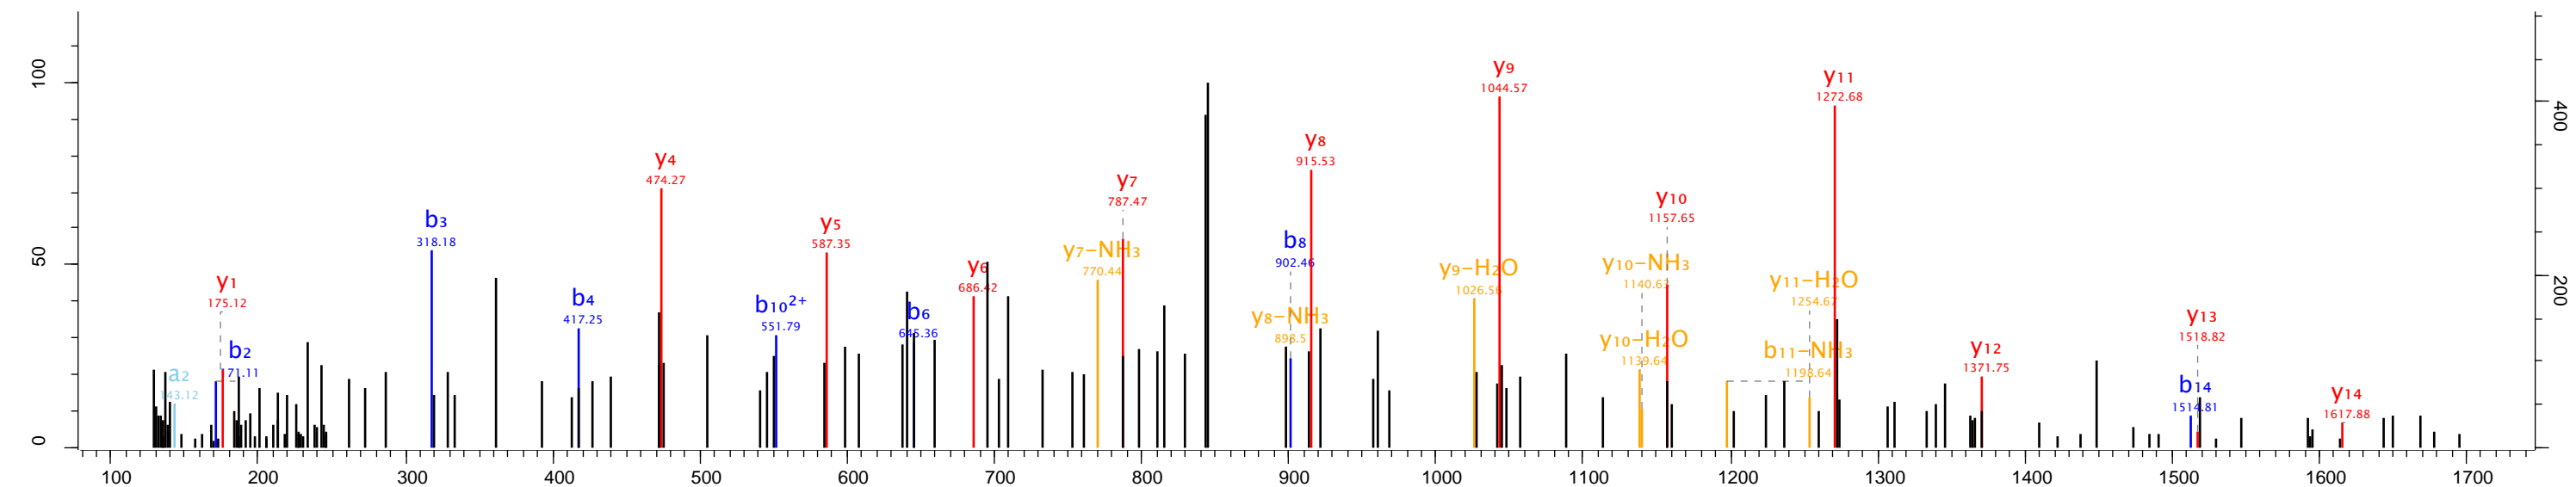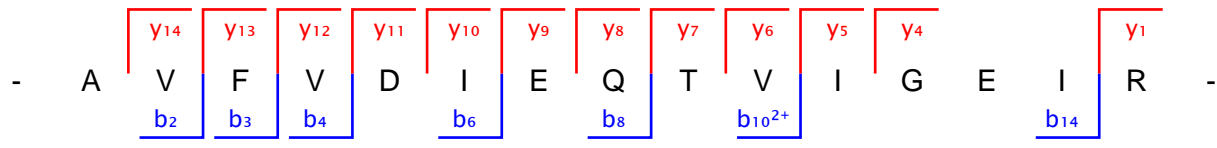

Spectral Annotation for Single-Peptide IDs in 16-cell Embryo using Q-OT-LIT



Raw file 2015-01-05\_CL03\_XenEmb\_x2 Scan 36246 Method ITMS; HCD Score 47.12 m/z 1193.29

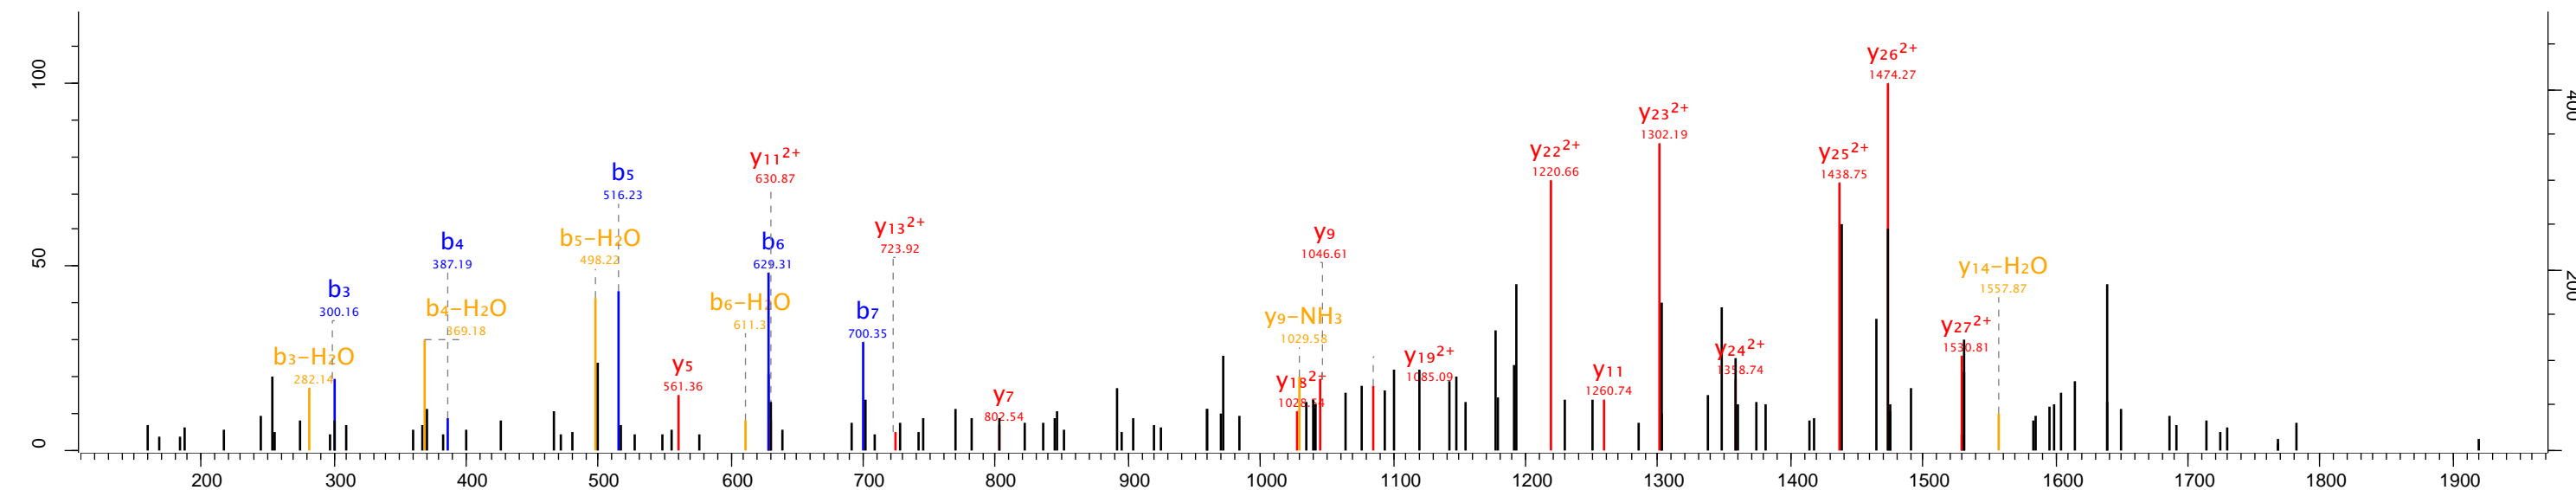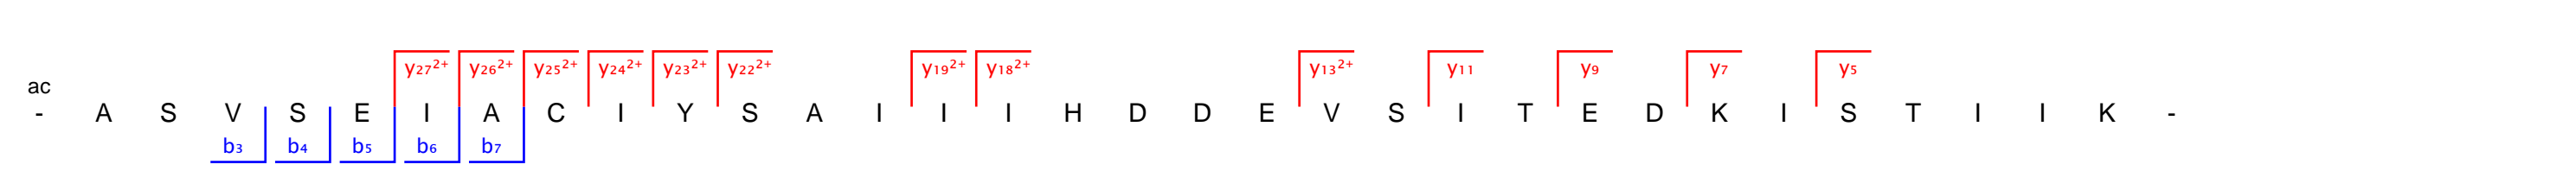

Raw file 2015-01-05\_CL03\_XenEmb\_x2 Scan 36327 Method ITMS; HCD Score 59.88 m/z 875.46

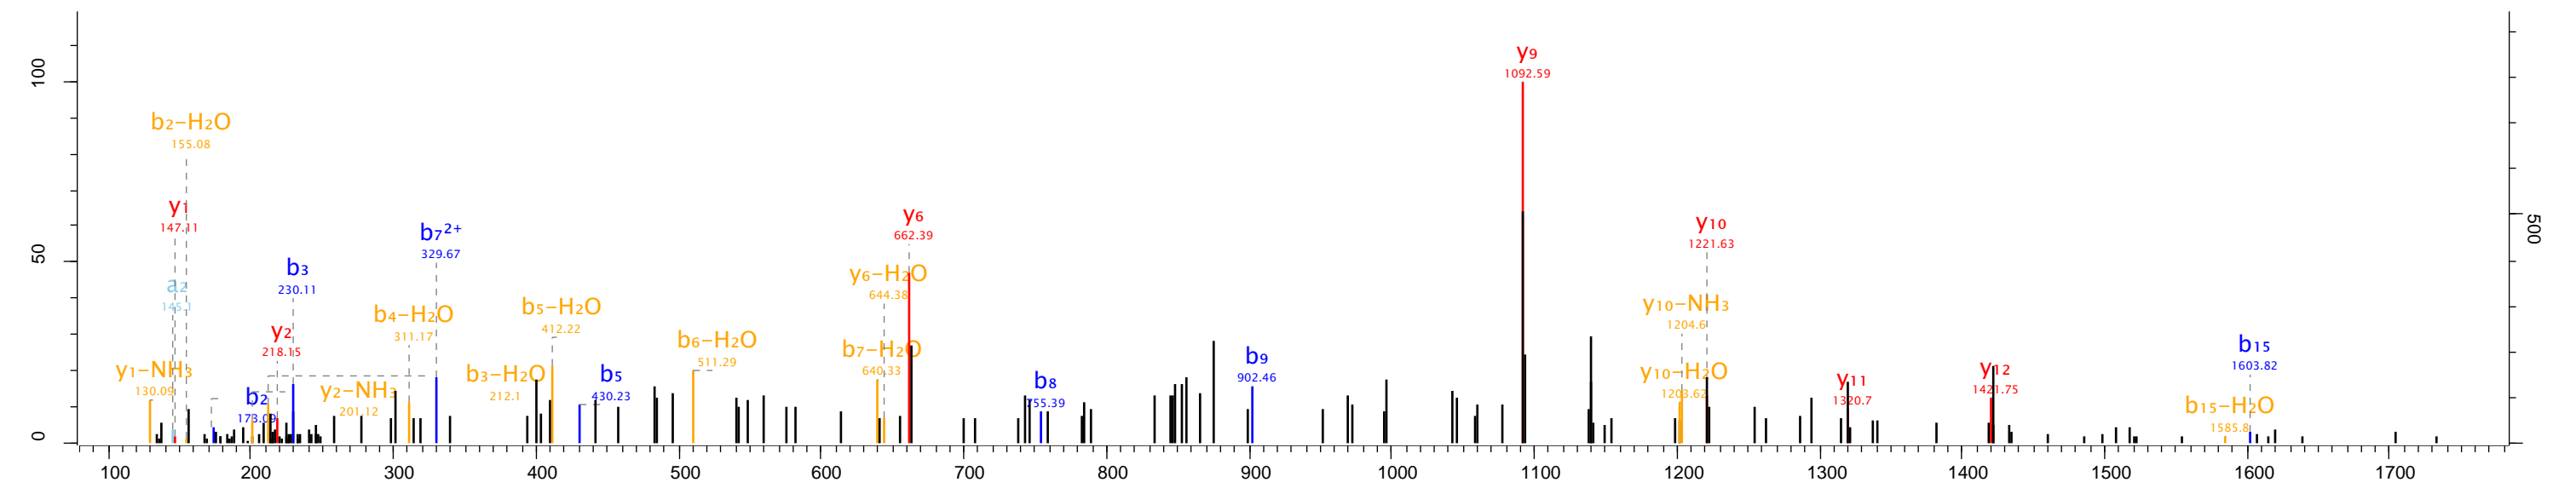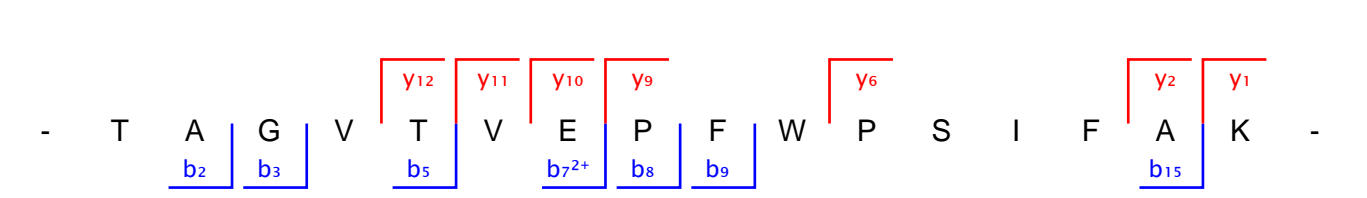

Raw file: 2015-01-05\_CL03\_XenEmb\_x2  
 Scan: 36344 Method: ITMS; HCD Score: 57.97 m/z: 875.96

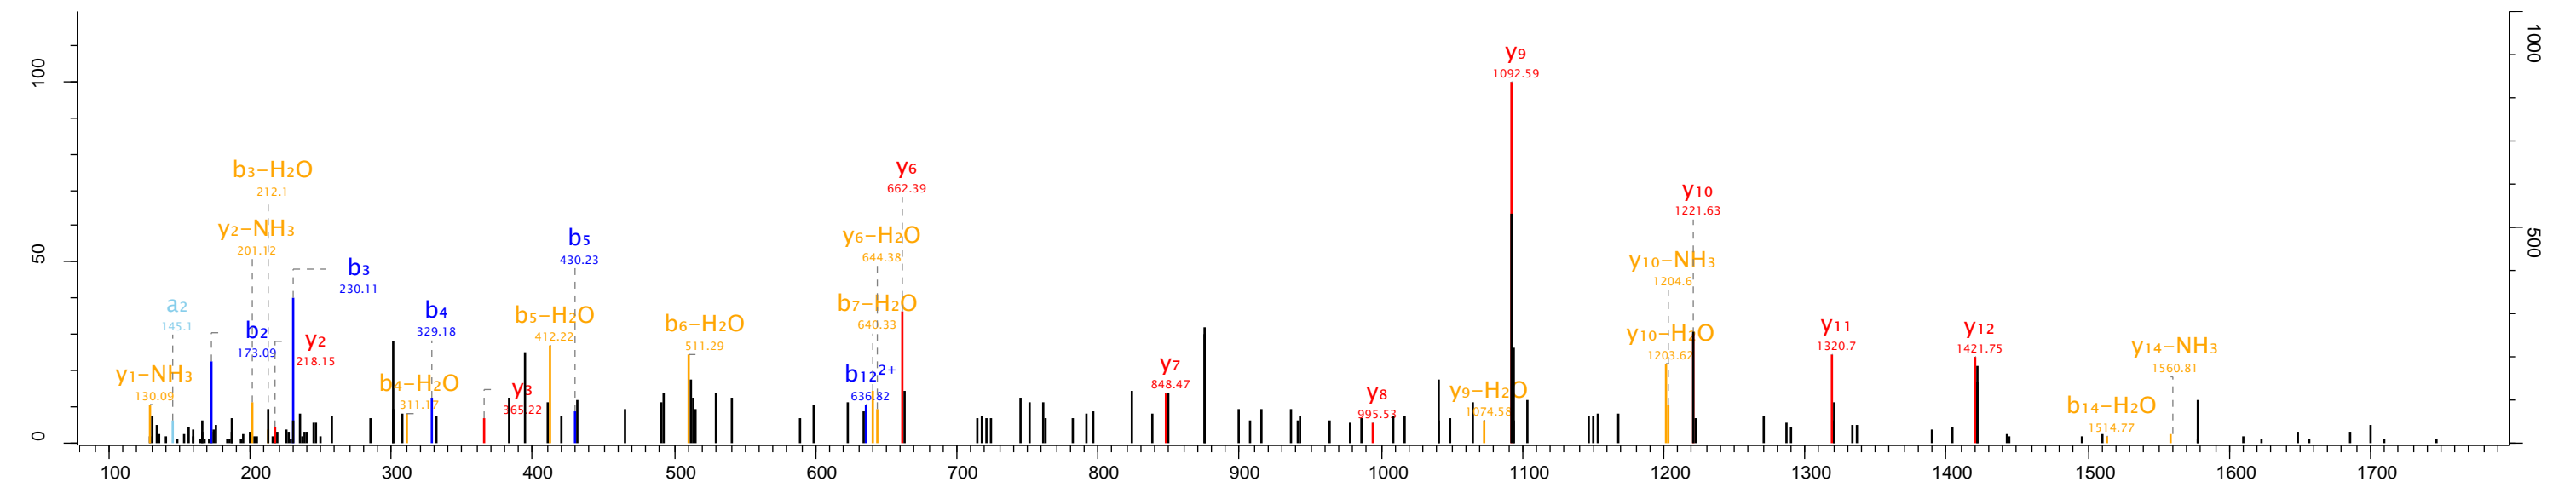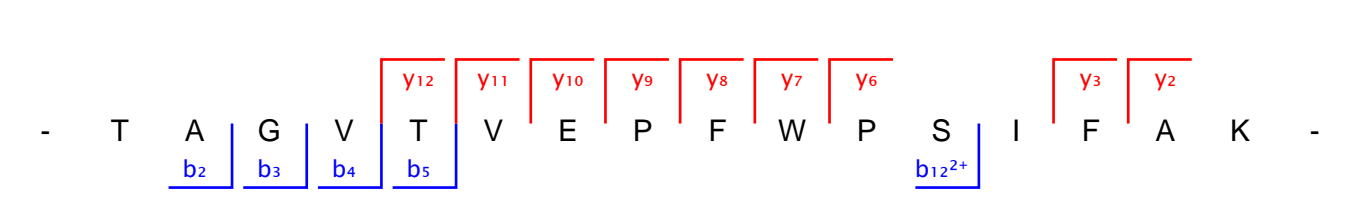

Raw file: 2015-01-05\_CL03\_XenEmb\_x2  
 Scan: 36363 Method: ITMS; HCD Score: 88.77 m/z: 875.97

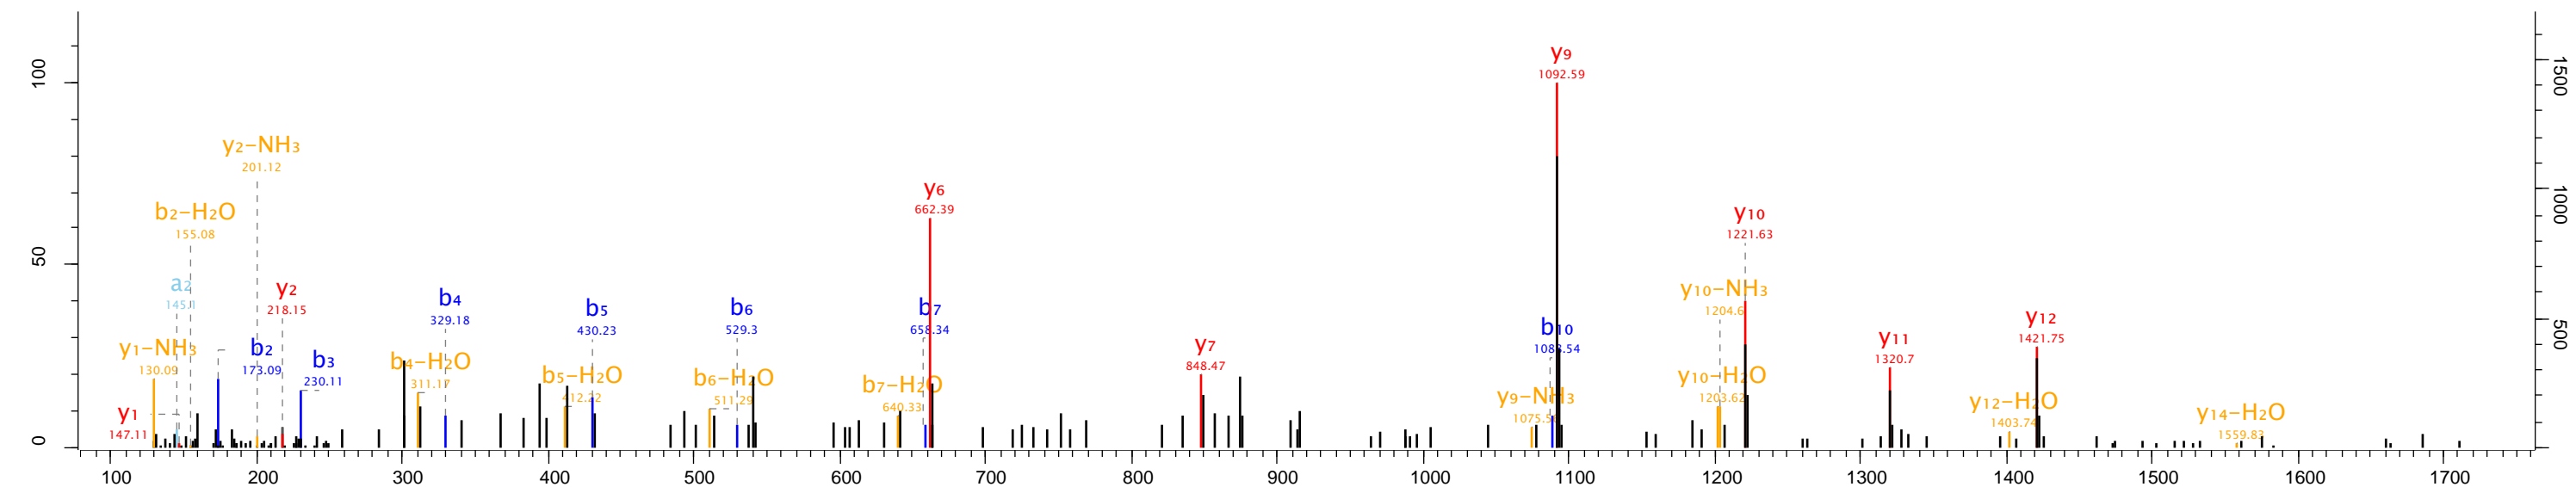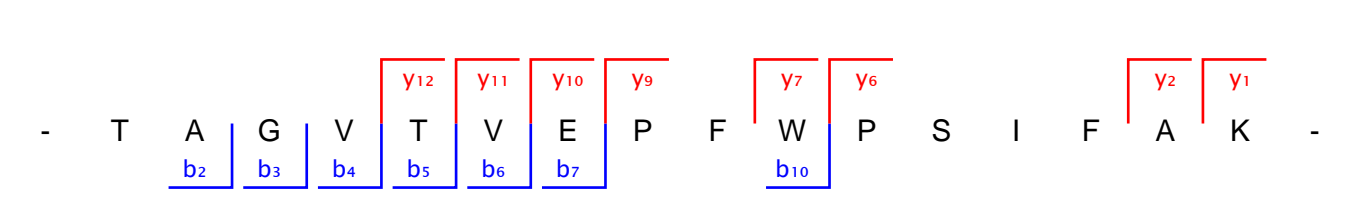

Raw file: 2015-01-05\_CL03\_XenEmb\_x2  
 Scan: 36374 Method: ITMS; HCD Score: 47.85 m/z: 842.96

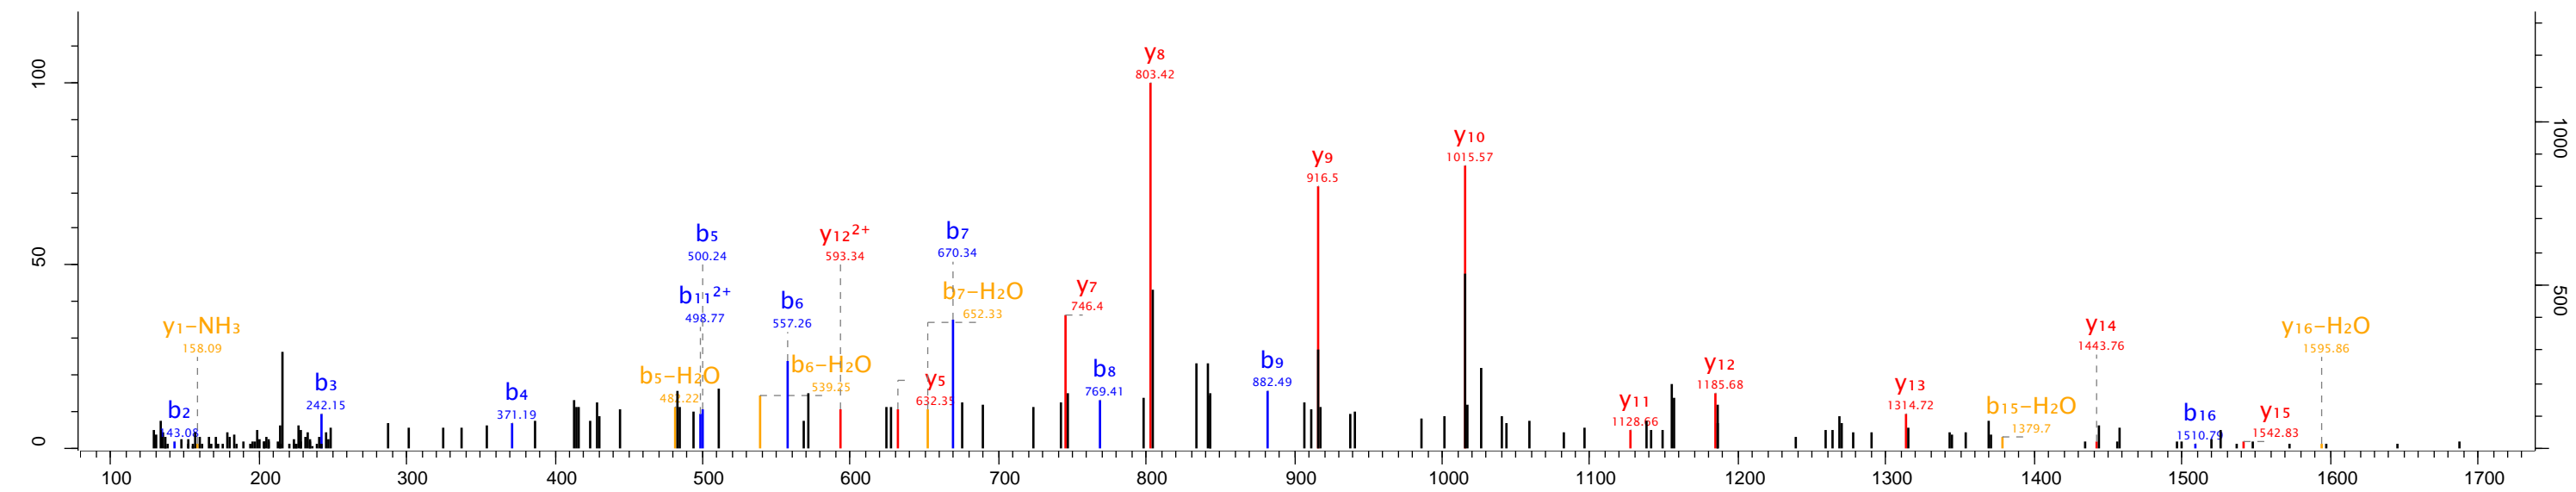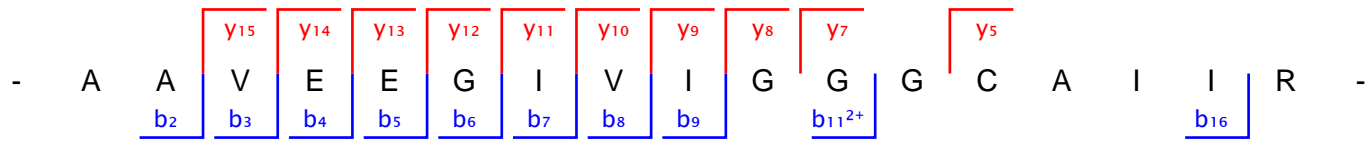

Raw file: 2015-01-05\_CL03\_XenEmb\_x2  
 Scan: 36380 Method: ITMS; HCD Score: 91.66 m/z: 875.97

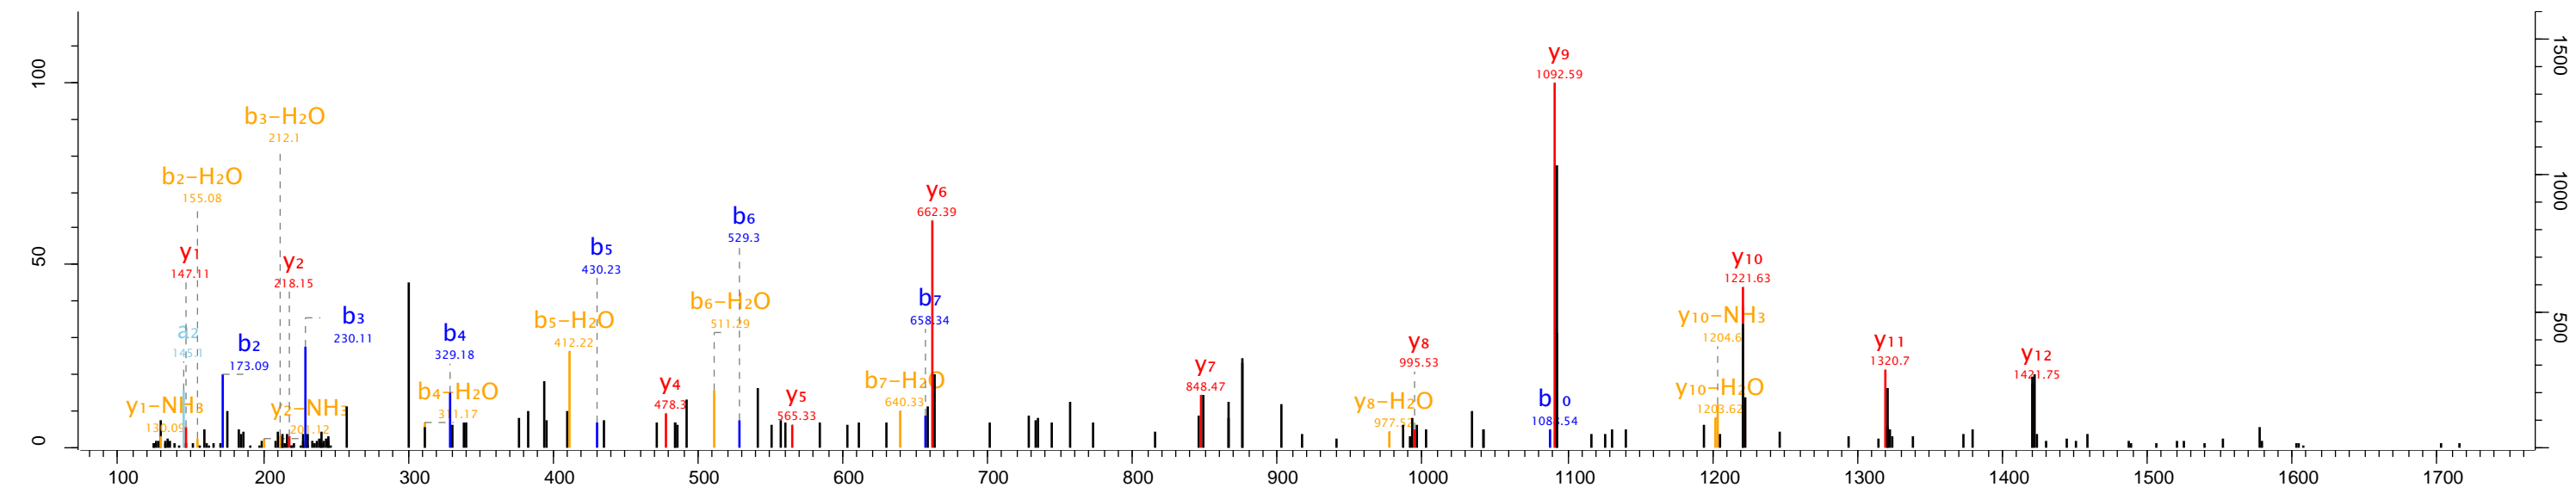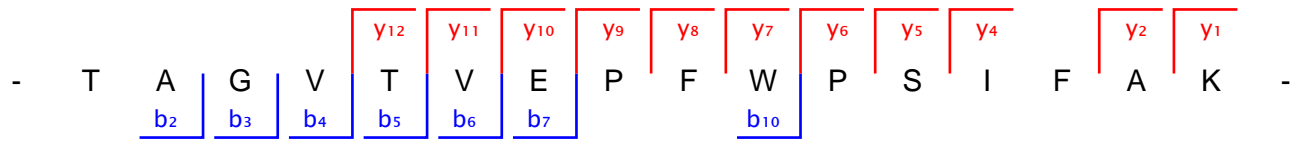

Spectral Annotation for Single-Peptide IDs in 16-cell Embryo using Q-OT-LIT

Raw file: 2015-01-05\_CL03\_XenEmb\_x2  
 Scan: 36393 Method: ITMS; HCD Score: 94.45 m/z: 875.96

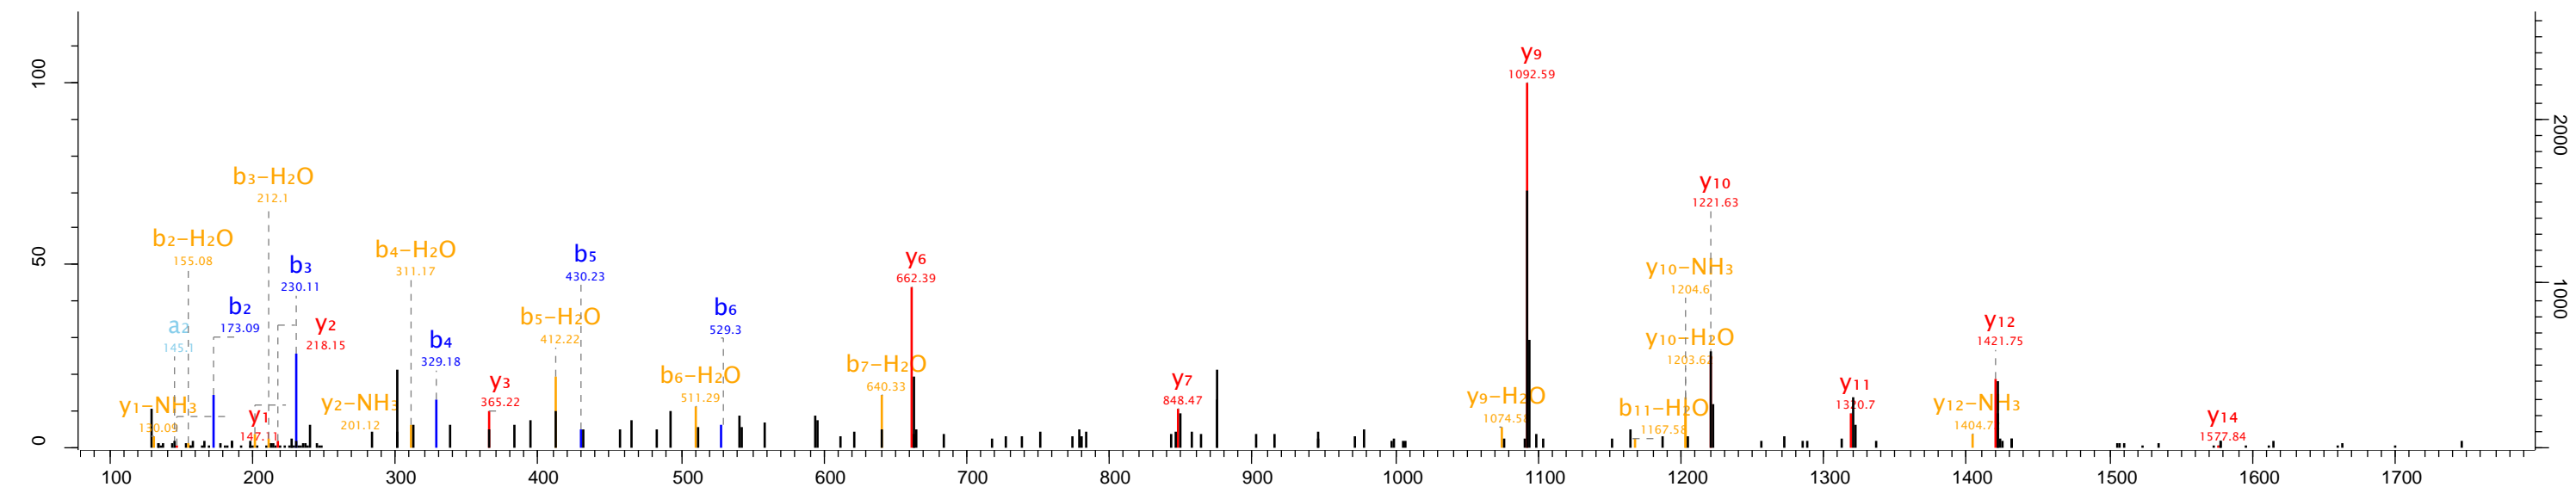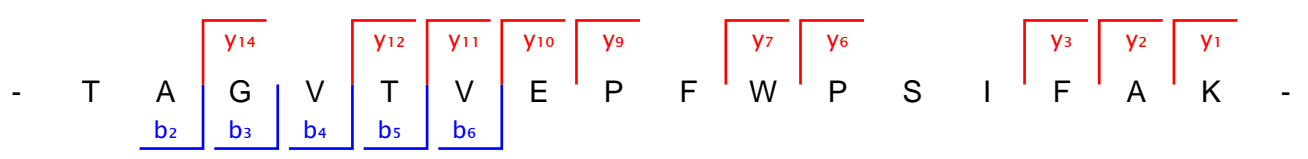

Spectral Annotation for Single-Peptide IDs in 16-cell Embryo using Q-OT-LIT

Raw file: 2015-01-05\_CL03\_XenEmb\_x2  
 Scan: 36410 Method: ITMS; HCD Score: 77.73 m/z: 842.95

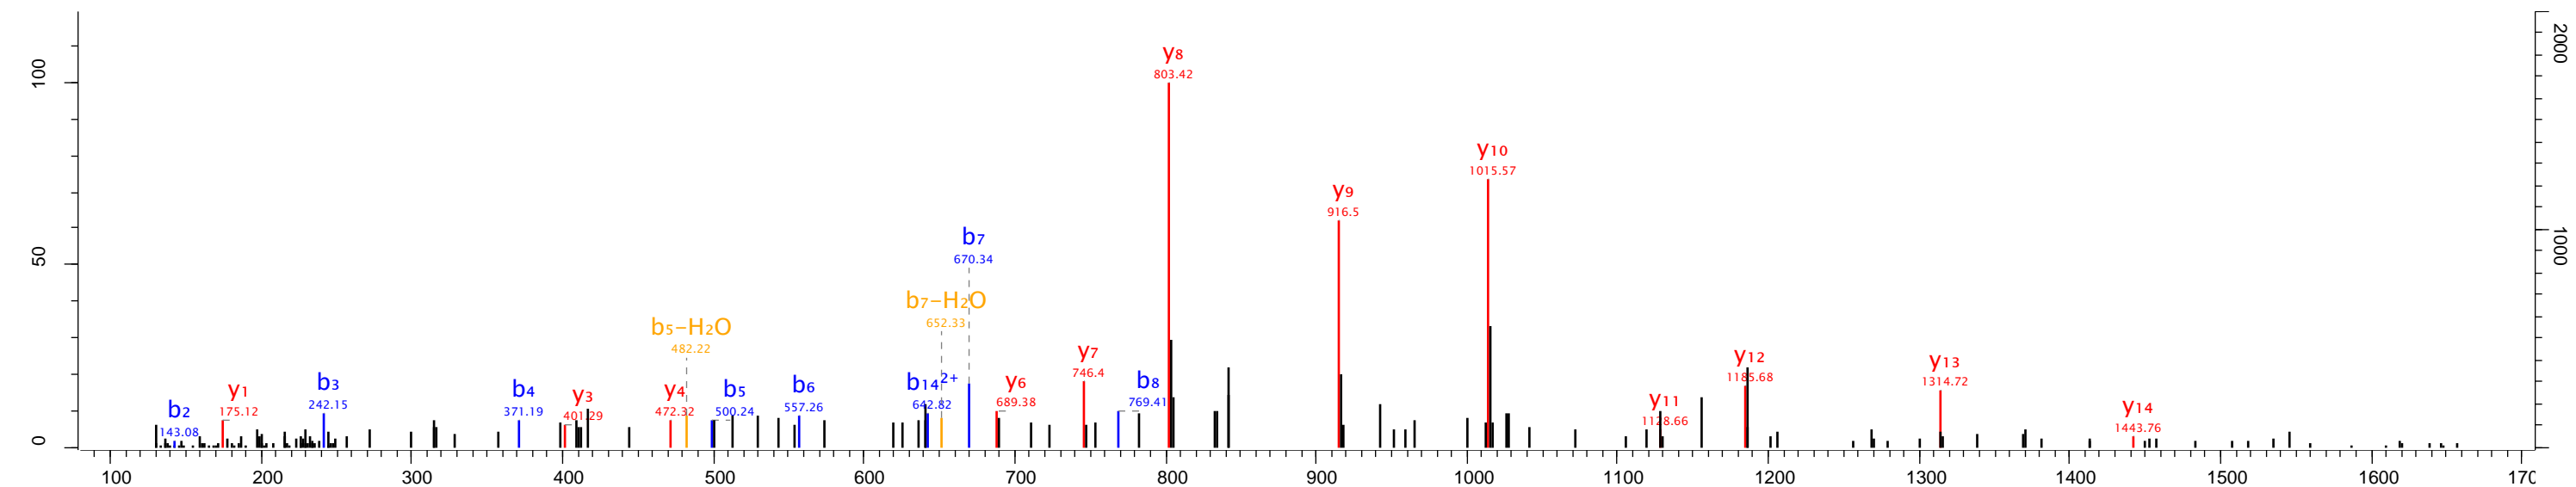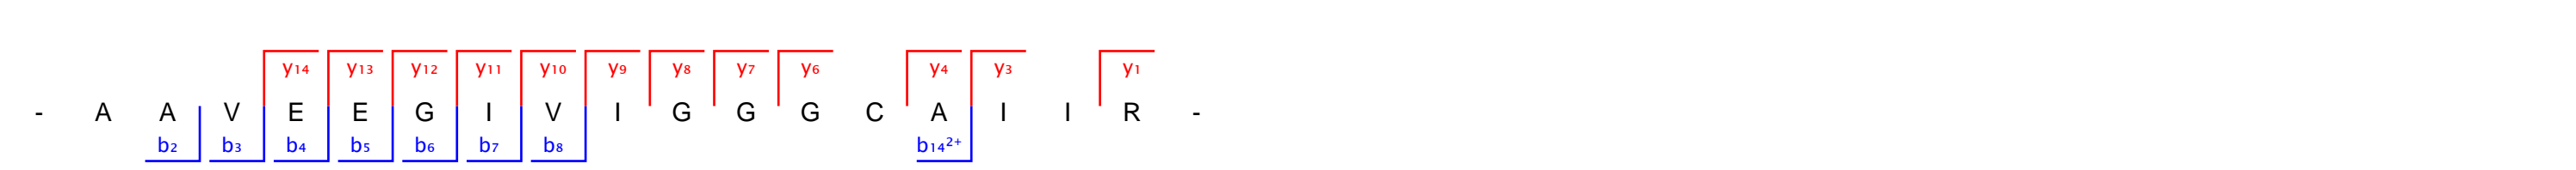



Raw file: 2015-01-05\_CL03\_XenEmb\_x2  
 Scan: 36411 Method: ITMS; HCD Score: 81.99 m/z: 875.96

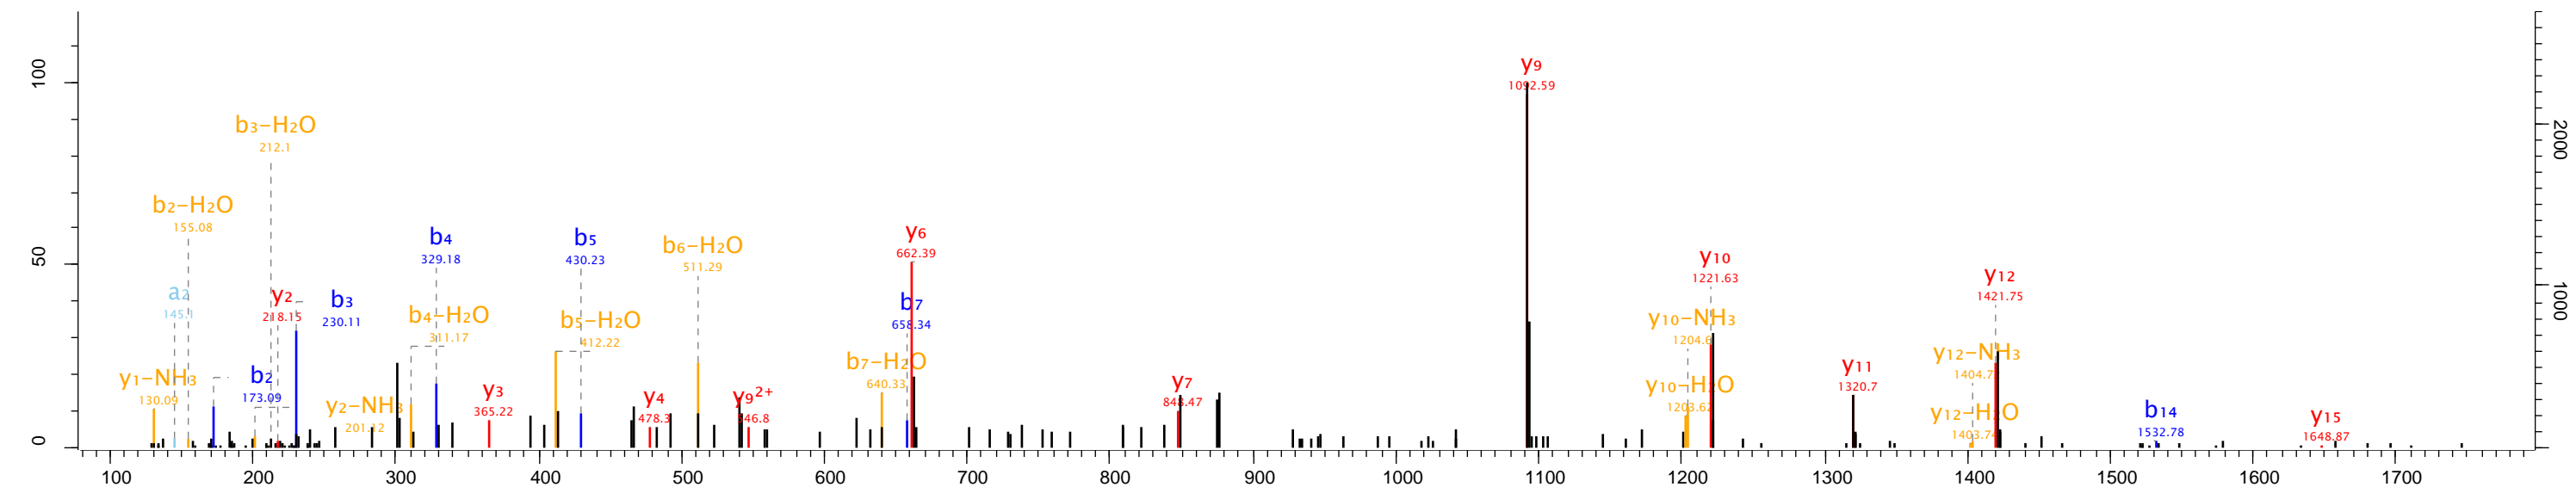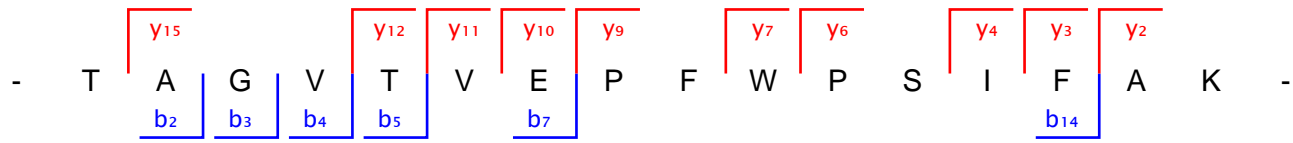

Spectral Annotation for Single-Peptide IDs in 16-cell Embryo using Q-OT-LIT

Raw file: 2015-01-05\_CL03\_XenEmb\_x2  
 Scan: 36418  
 Method: ITMS; HCD  
 Score: 35.55  
 m/z: 1105.18

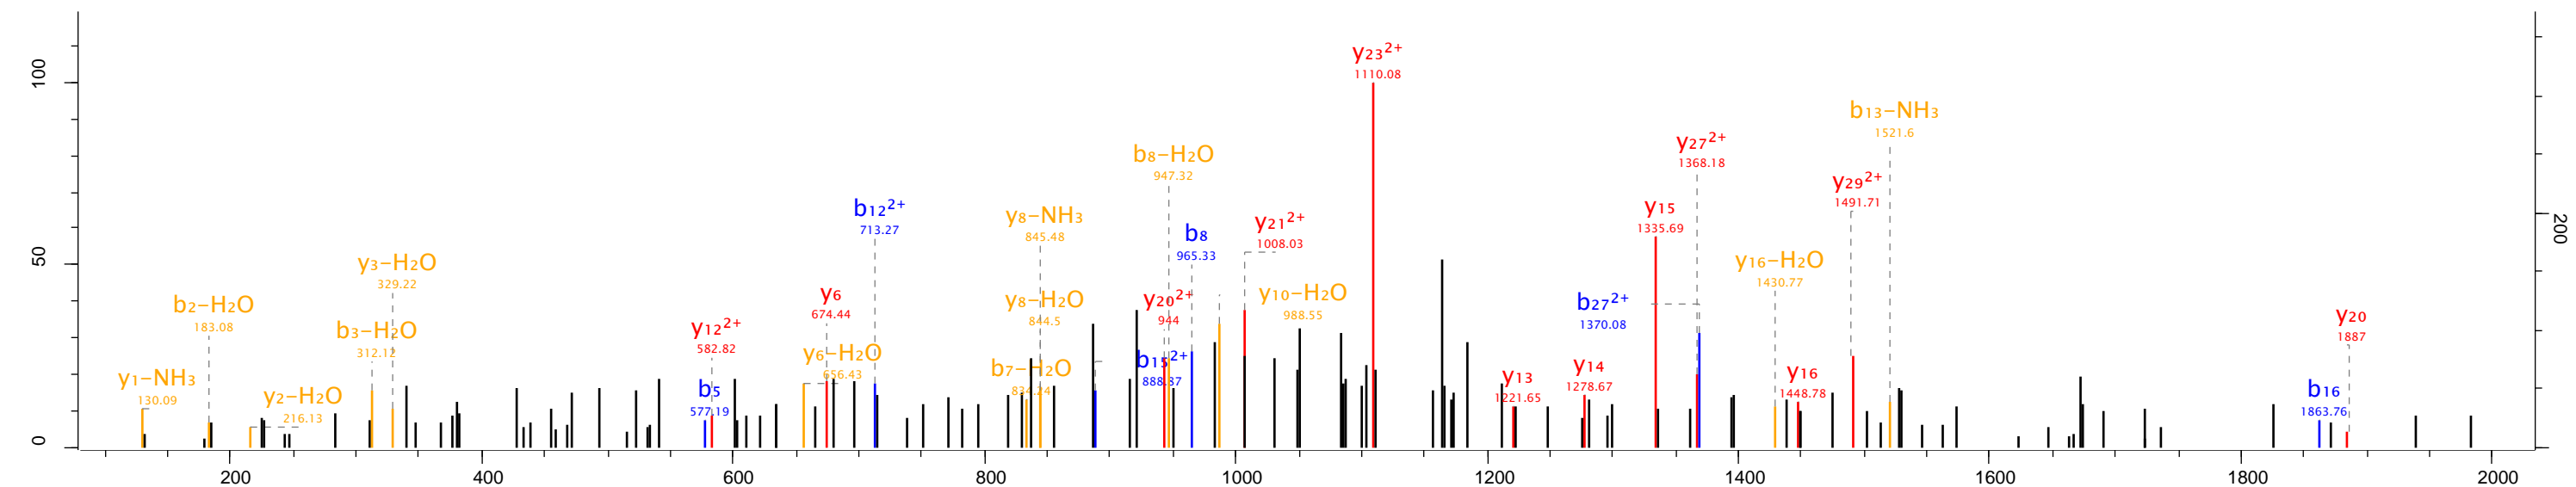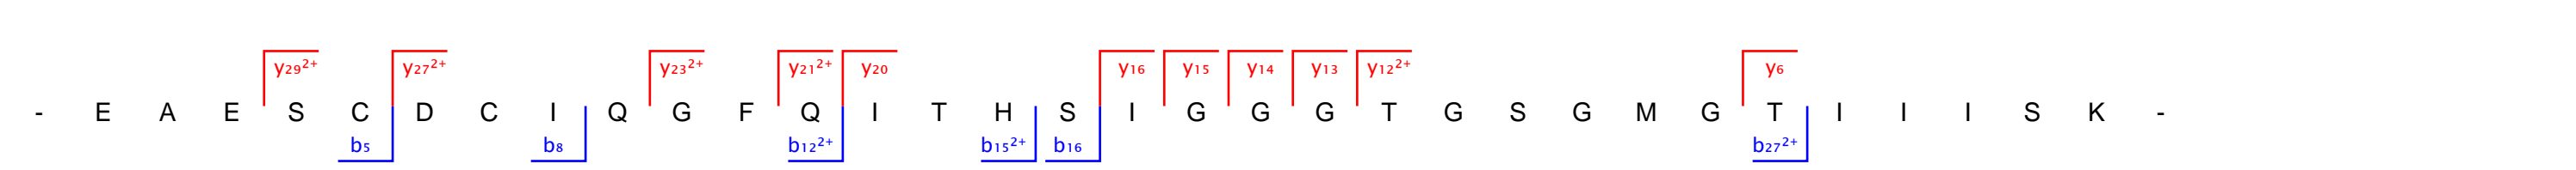

Raw file: 2015-01-05\_CL03\_XenEmb\_x2  
 Scan: 36445  
 Method: ITMS; HCD  
 Score: 45.56  
 m/z: 1105.18

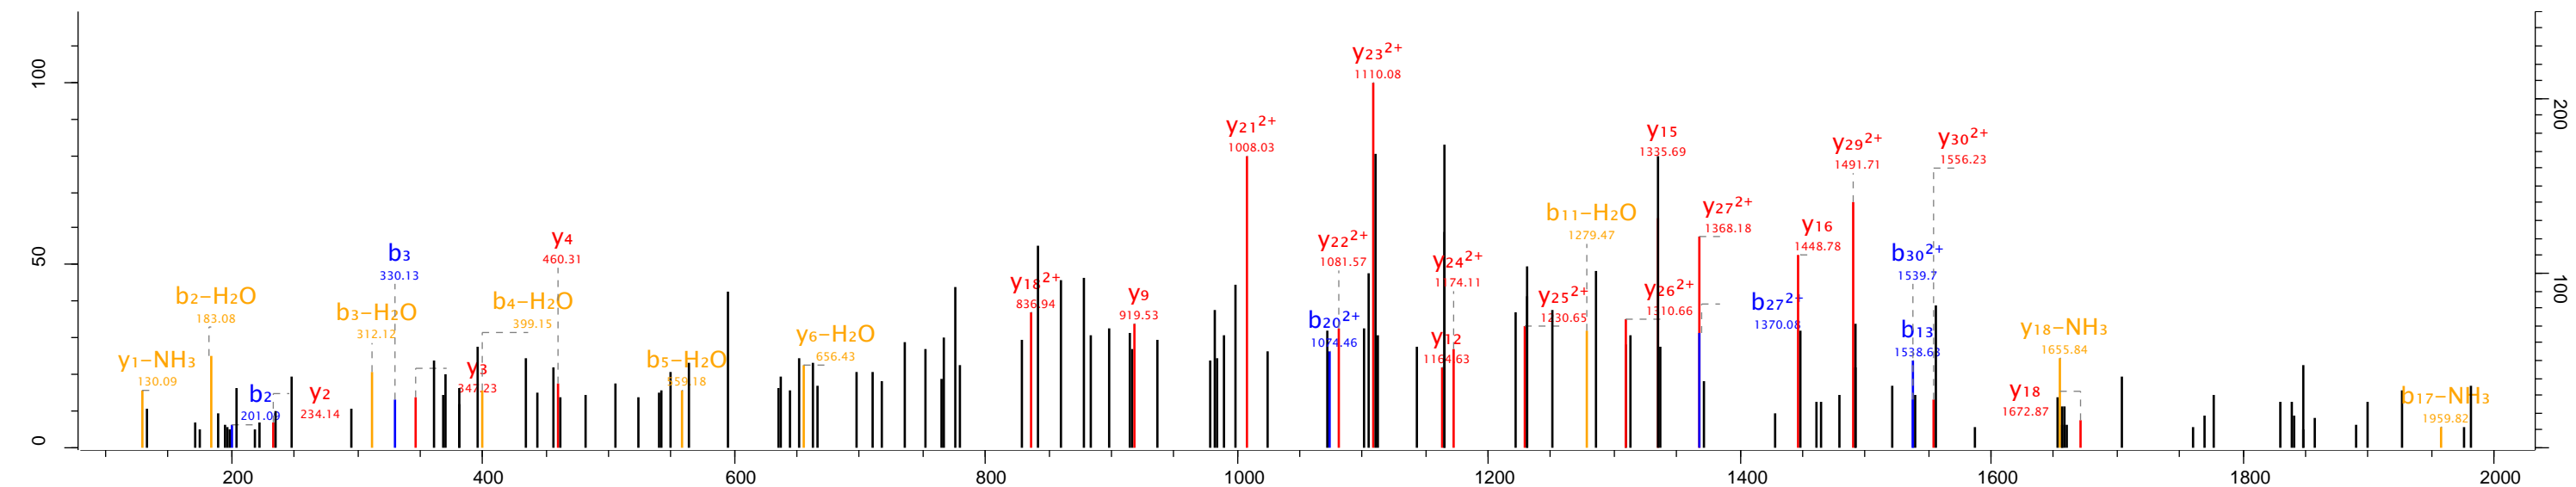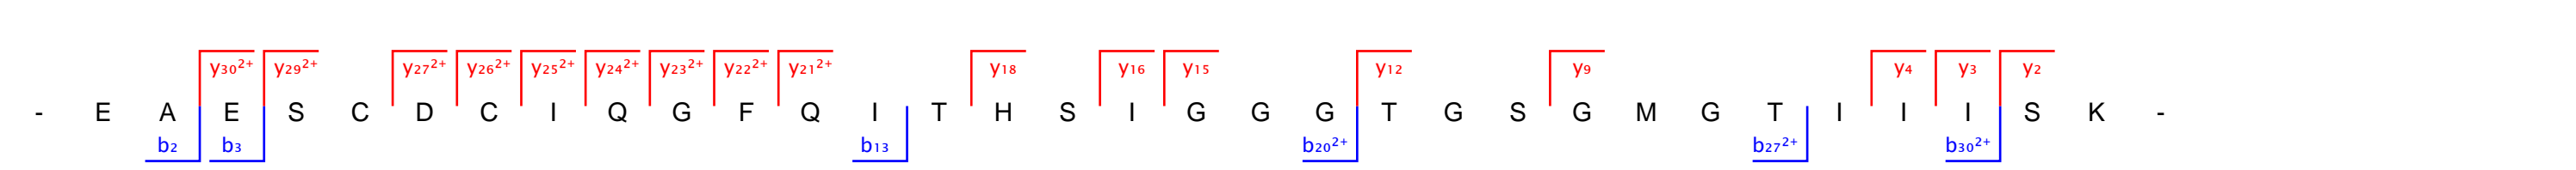

Spectral Annotation for Single-Peptide IDs in 16-cell Embryo using Q-OT-LIT

Raw file: 2015-01-05\_CL03\_XenEmb\_x2  
 Scan: 36449 Method: ITMS; HCD Score: 77.32 m/z: 842.95

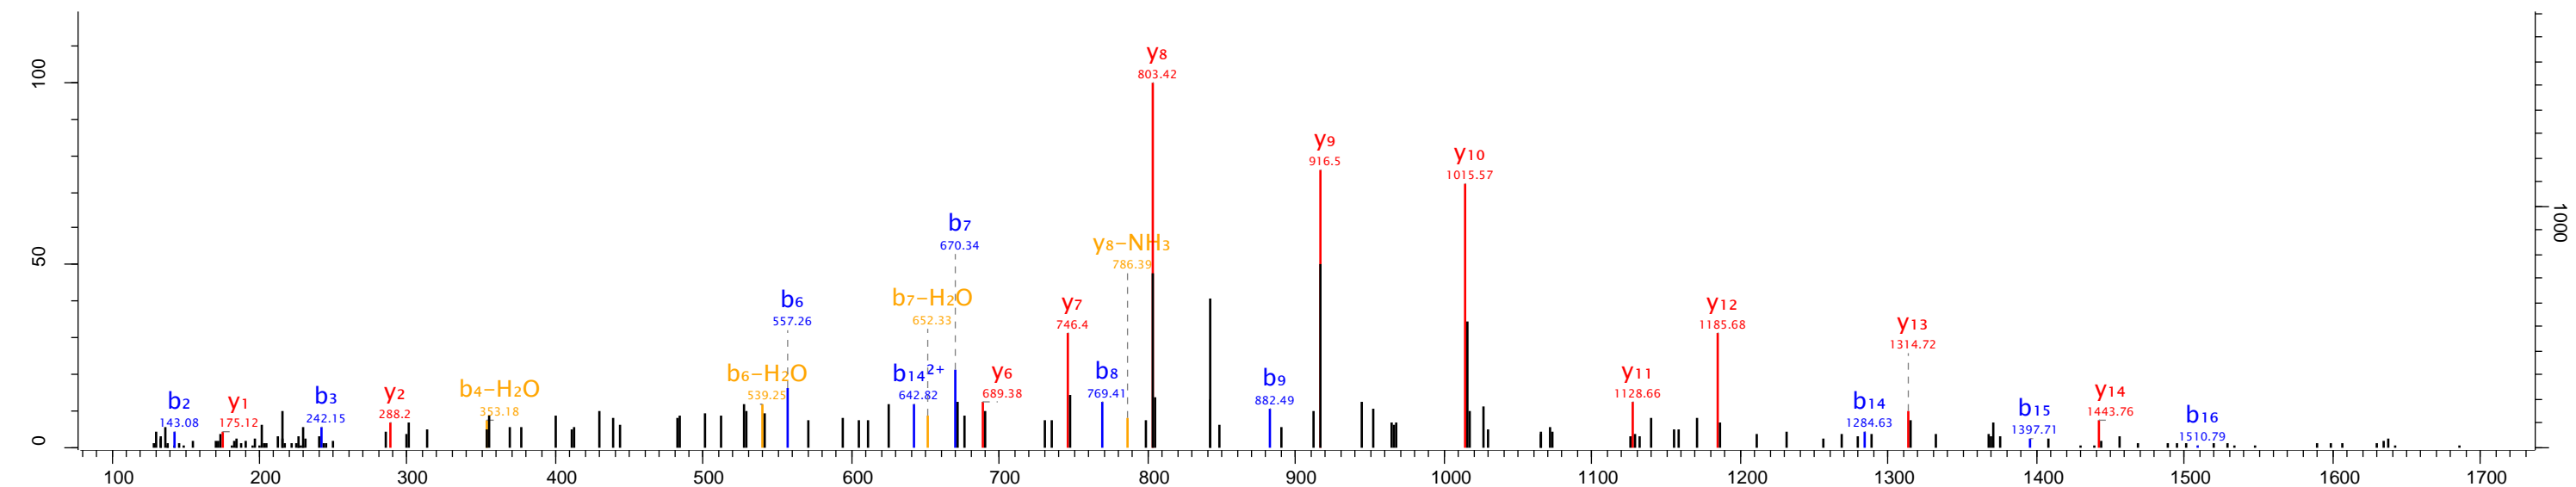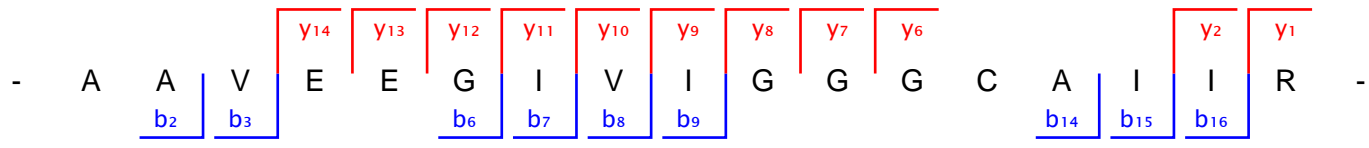

Spectral Annotation for Single-Peptide IDs in 16-cell Embryo using Q-OT-LIT

Raw file 2015-01-05\_CL03\_XenEmb\_x2 Scan 36525 Method ITMS; HCD Score 27.87 m/z 1055.18

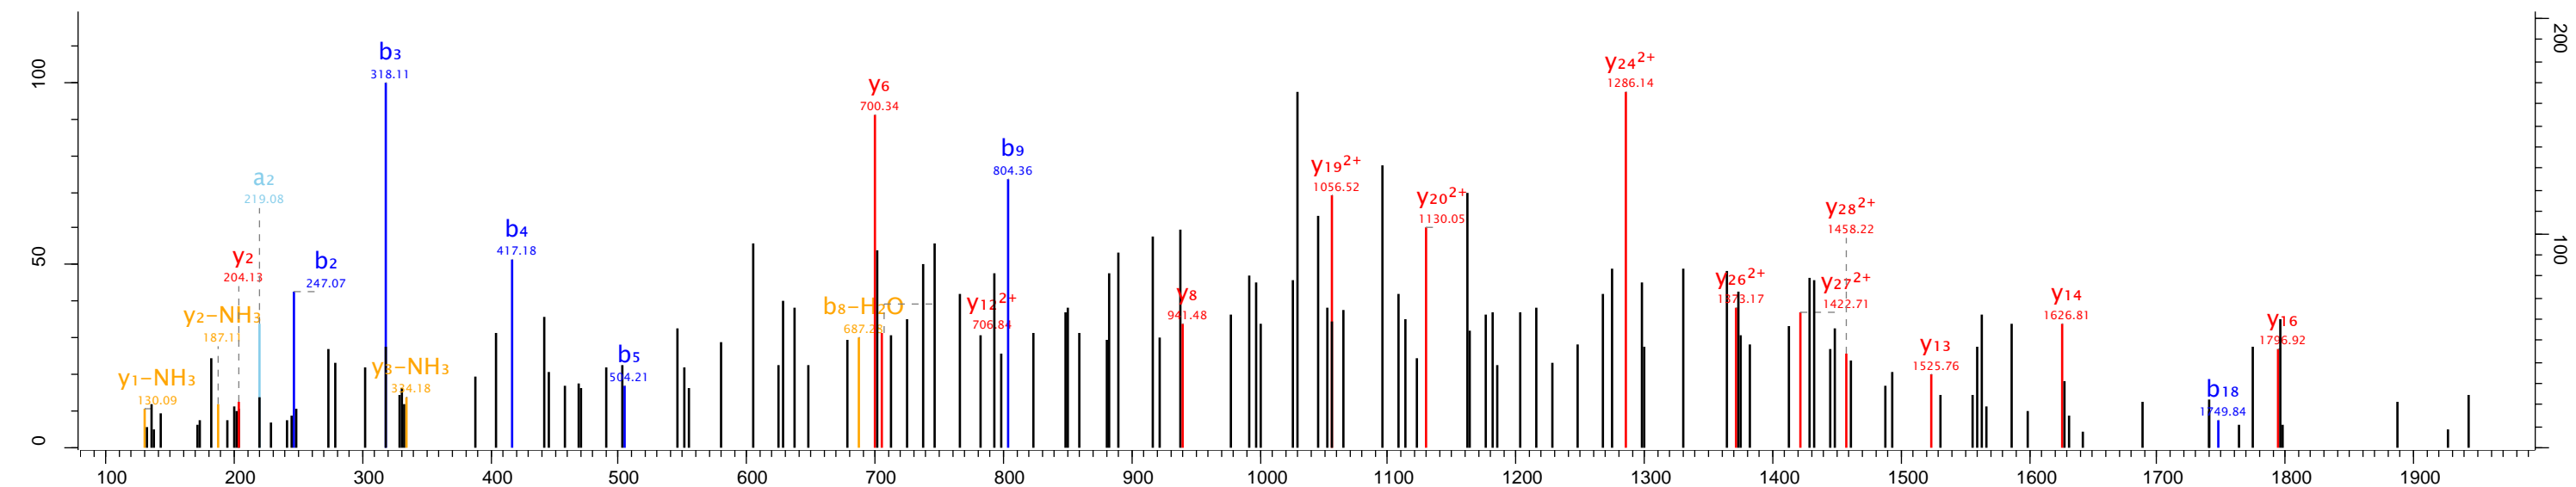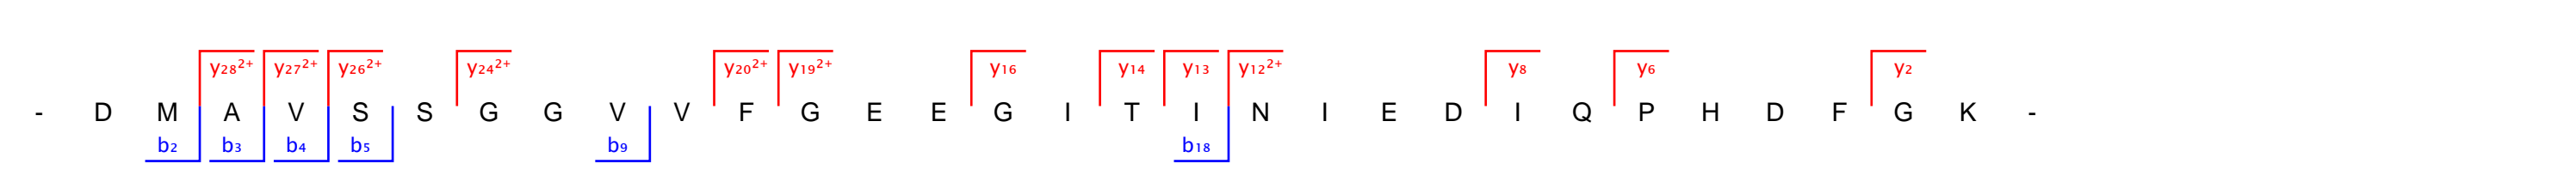

Raw file 2015-01-05\_CL03\_XenEmb\_x2 Scan 36526 Method ITMS; HCD Score 45.67 m/z 1193.62

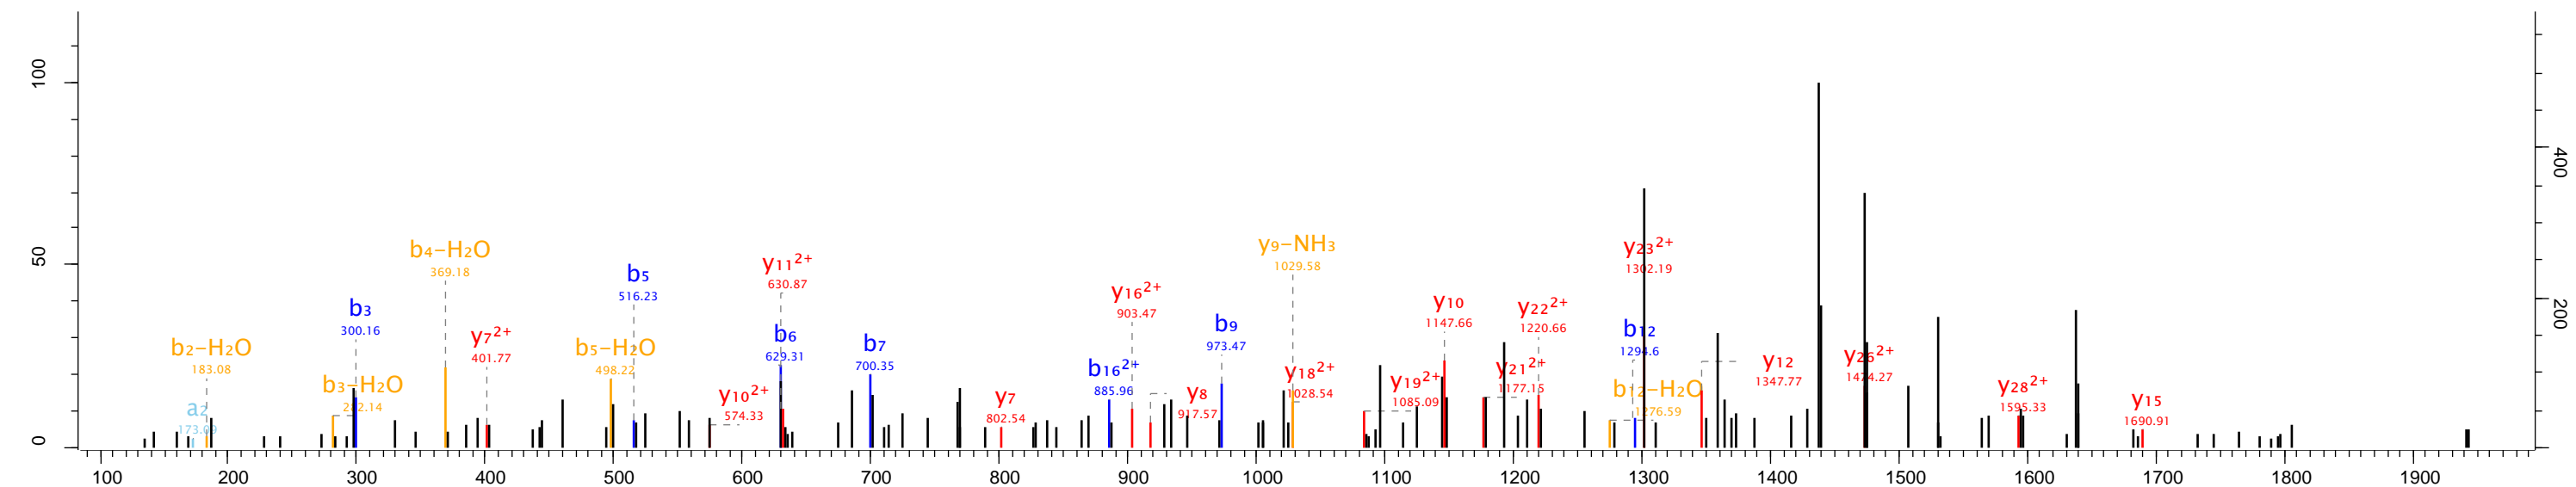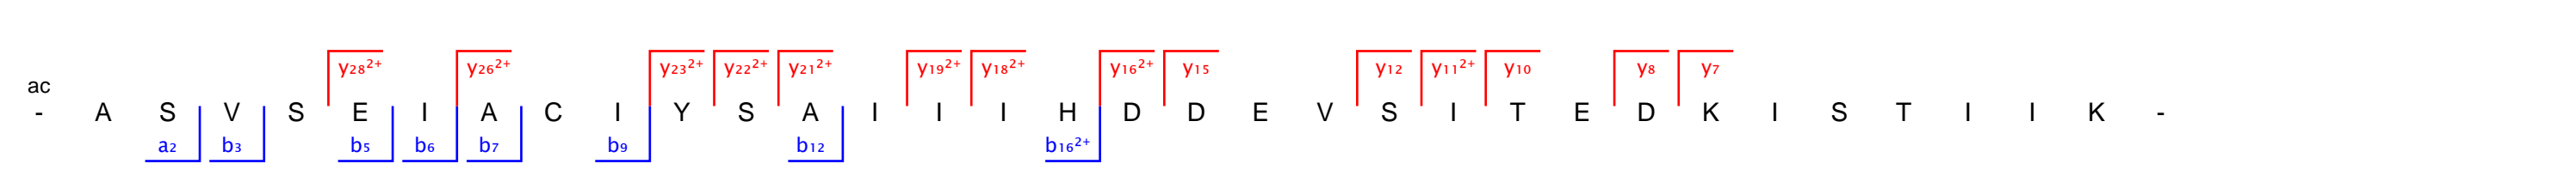

Raw file 2015-01-05\_CL03\_XenEmb\_x2 Scan 36580 Method ITMS; HCD Score 25.67 m/z 1054.84

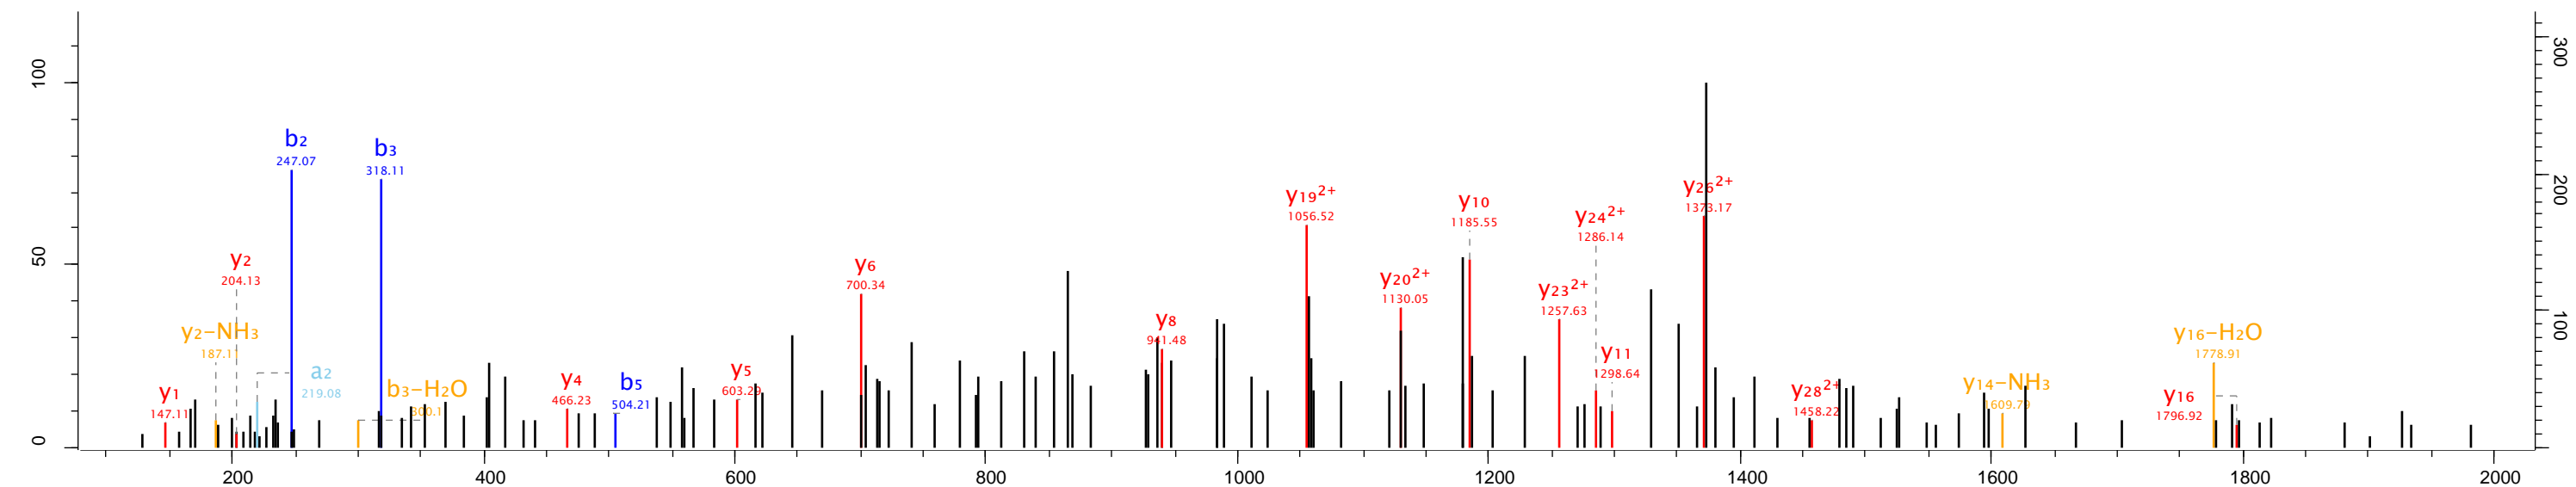

- D M A V S S G G V V F G E E G I T I N I E D I Q P H D F G K -

Fragmentation mapping below the peptide sequence:

- Red boxes above the sequence indicate y-ion fragmentation: y<sub>28</sub><sup>2+</sup> (M-A), y<sub>26</sub><sup>2+</sup> (V-S), y<sub>24</sub><sup>2+</sup> (S-G), y<sub>23</sub><sup>2+</sup> (G-G), y<sub>20</sub><sup>2+</sup> (V-F), y<sub>19</sub><sup>2+</sup> (F-G), y<sub>16</sub> (E-G), y<sub>11</sub> (I-I), y<sub>10</sub> (I-E), y<sub>8</sub> (D-I), y<sub>6</sub> (Q-P), y<sub>5</sub> (P-H), y<sub>4</sub> (H-D), y<sub>2</sub> (F-G), y<sub>1</sub> (G-K).
- Blue boxes below the sequence indicate b-ion fragmentation: b<sub>2</sub> (M-A), b<sub>3</sub> (A-V), b<sub>5</sub> (V-S).

Raw file 2015-01-05\_CL03\_XenEmb\_x2 Scan 36587 Method ITMS; HCD Score 57.34 m/z 1193.28

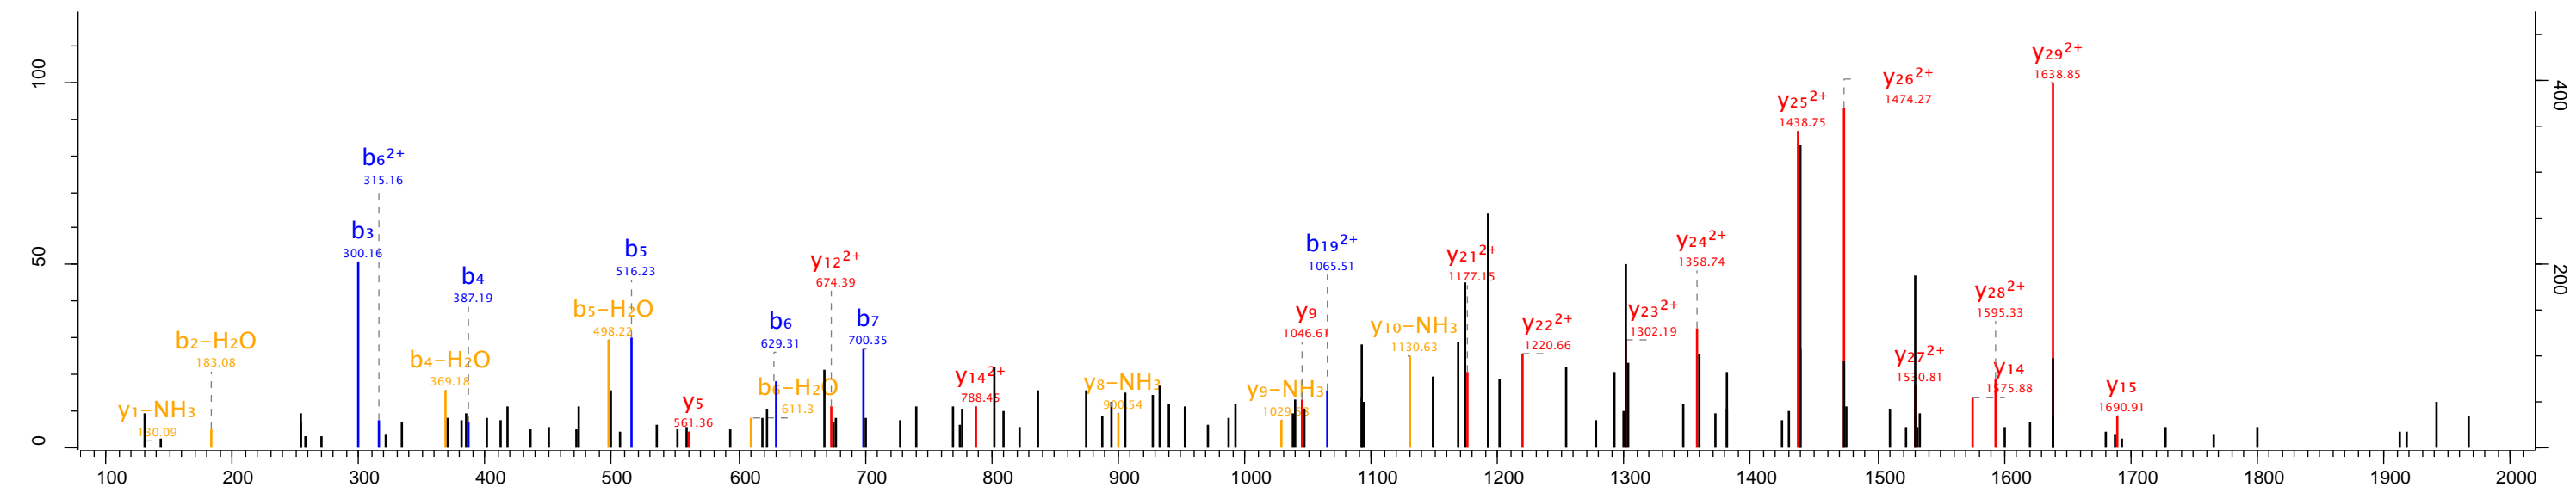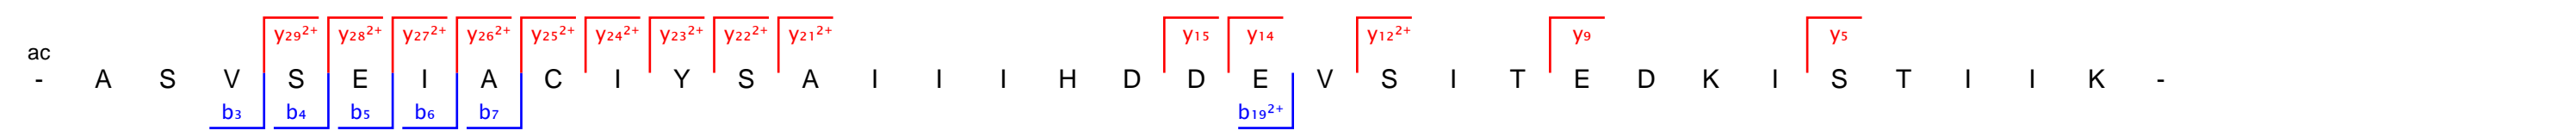

Spectral Annotation for Single-Peptide IDs in 16-cell Embryo using Q-OT-LIT



Raw file 2015-01-05\_CL03\_XenEmb\_x2 Scan 36600 Method ITMS; HCD Score 33.55 m/z 1054.84

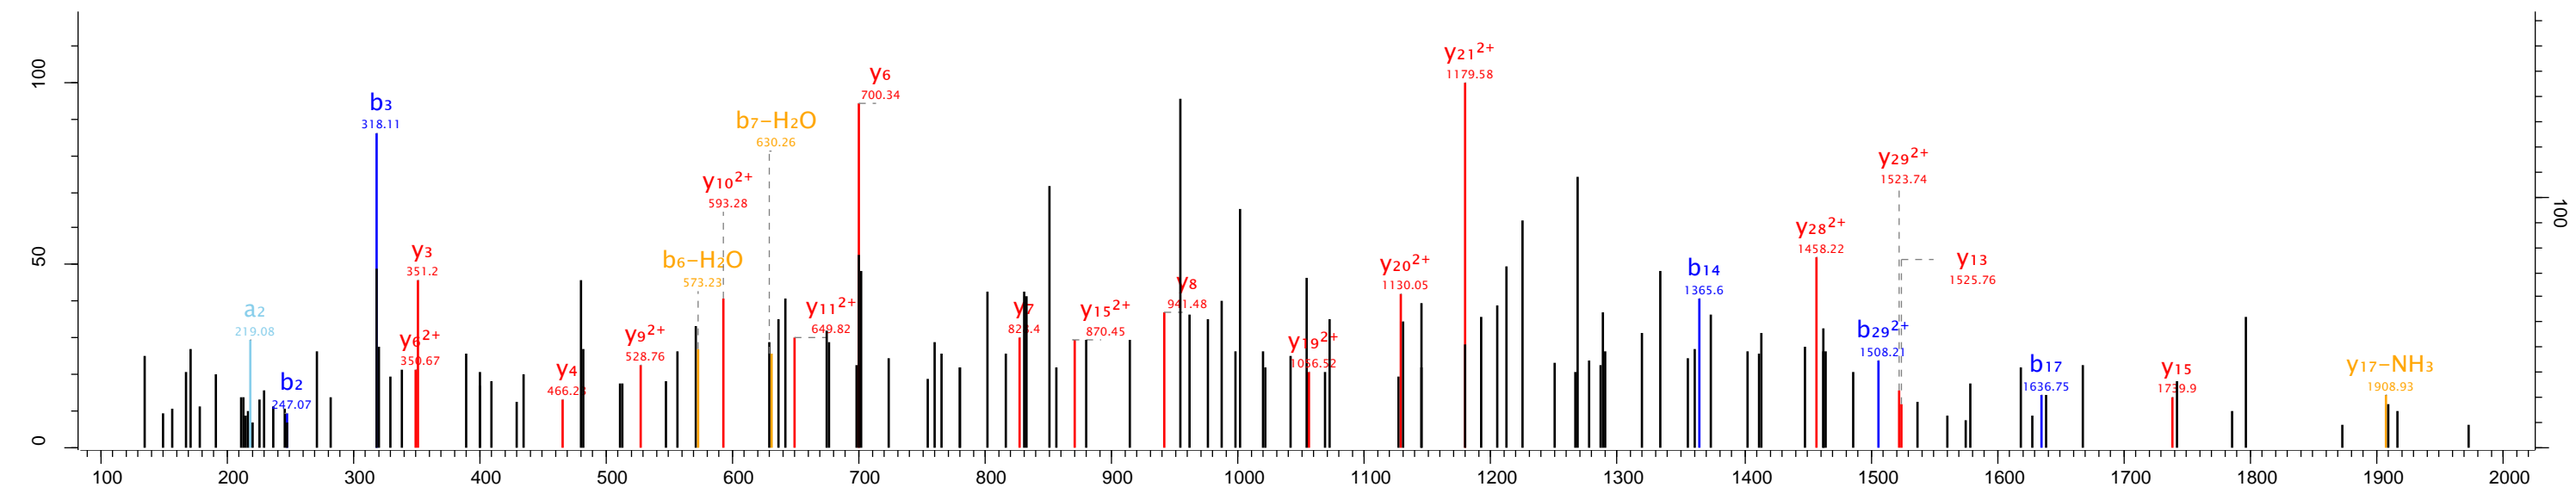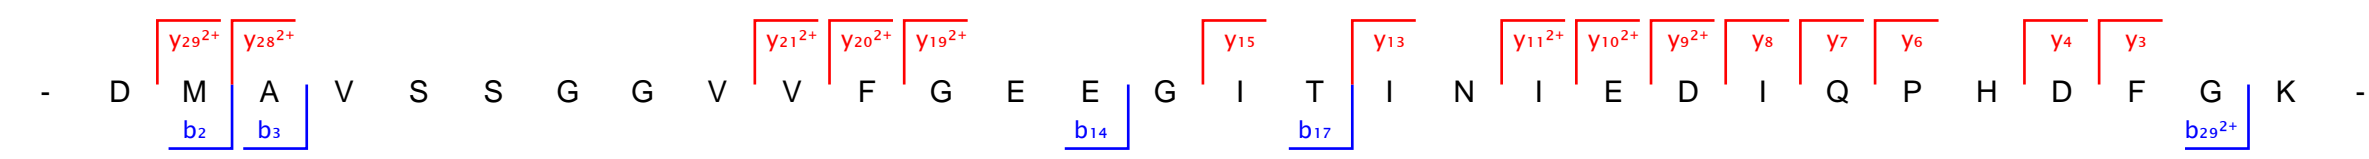

Raw file 2015-01-05\_CL03\_XenEmb\_x2 Scan 36643 Method ITMS; HCD Score 27.87 m/z 1055.17

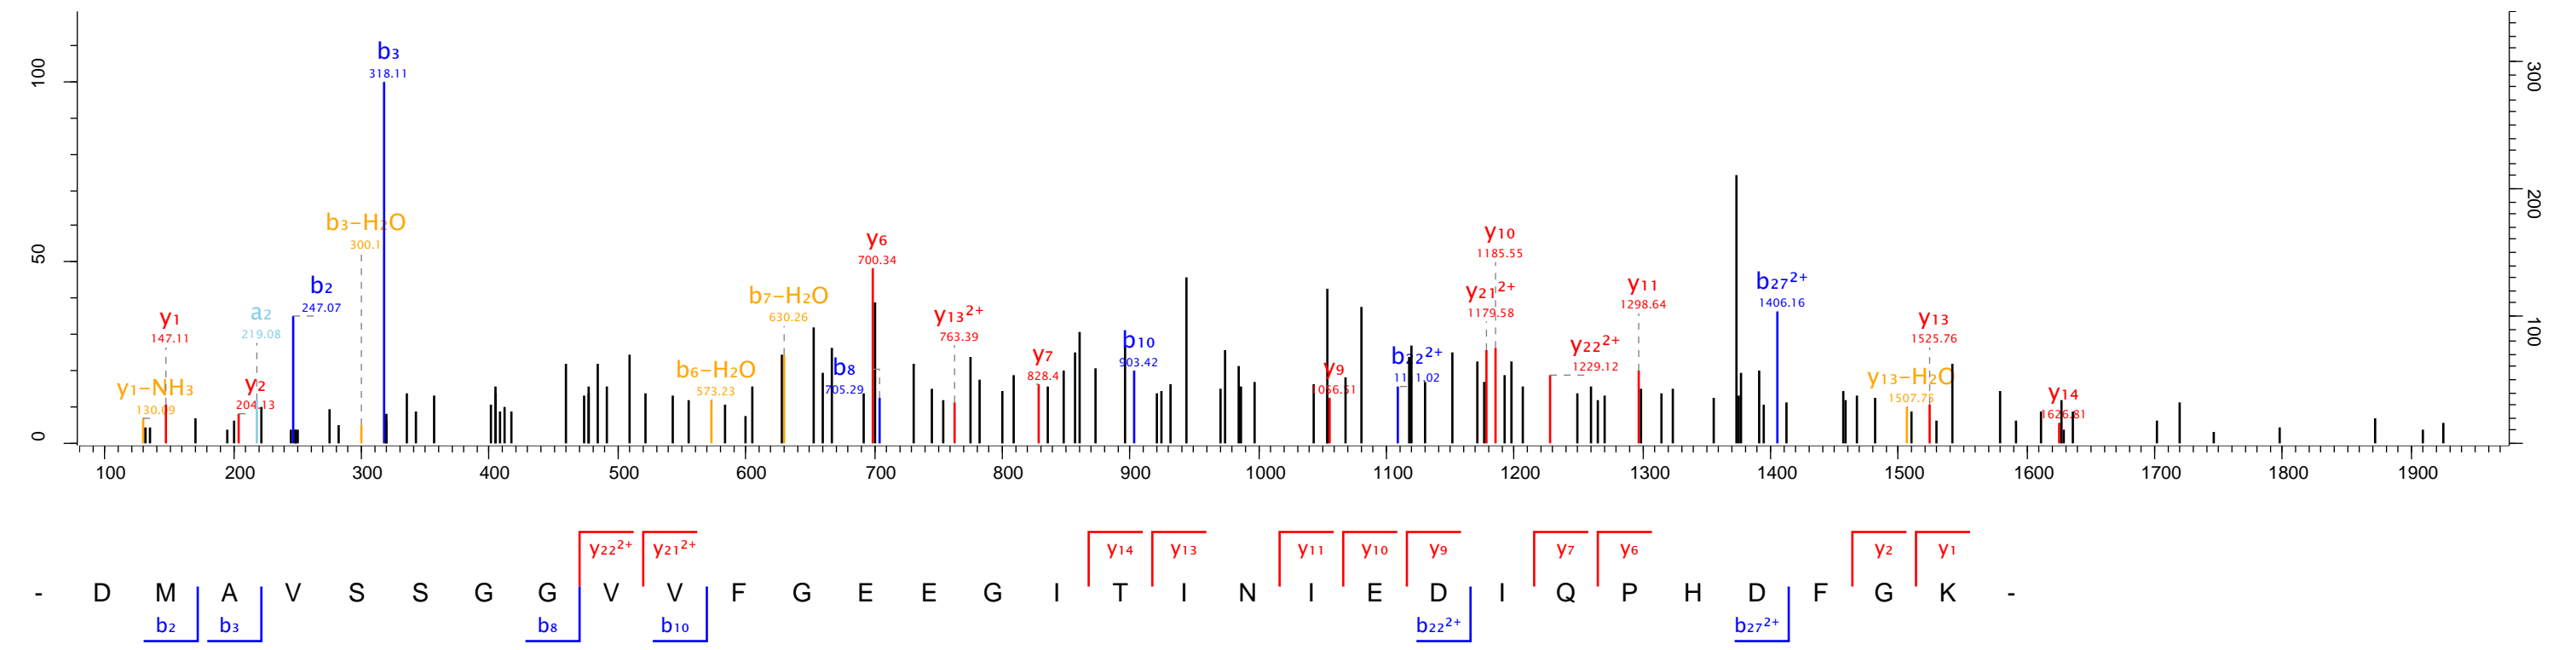

Spectral Annotation for Single-Peptide IDs in 16-cell Embryo using Q-OT-LIT

Raw file 2015-01-05\_CL03\_XenEmb\_x2 Scan 36720 Method ITMS; HCD Score 45.56 m/z 1078.17

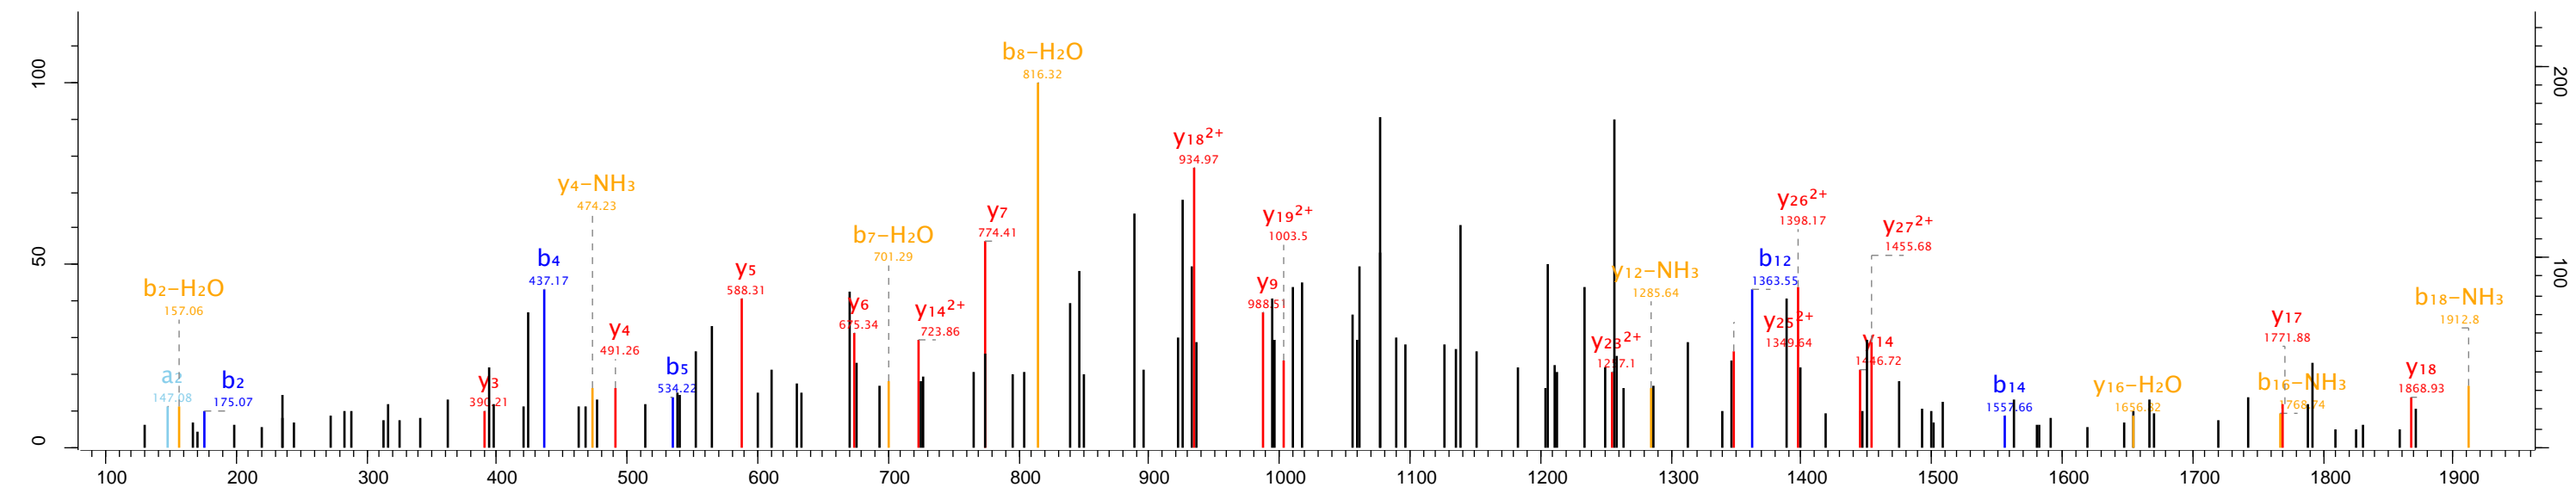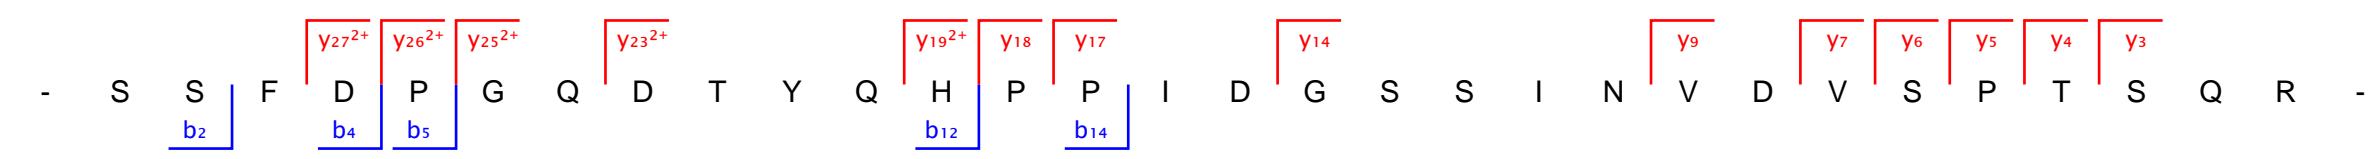

Spectral Annotation for Single-Peptide IDs in 16-cell Embryo using Q-OT-LIT

Raw file: 2015-01-05\_CL03\_XenEmb\_x2  
 Scan: 36730 Method: ITMS; HCD Score: 59.71 m/z: 578.96

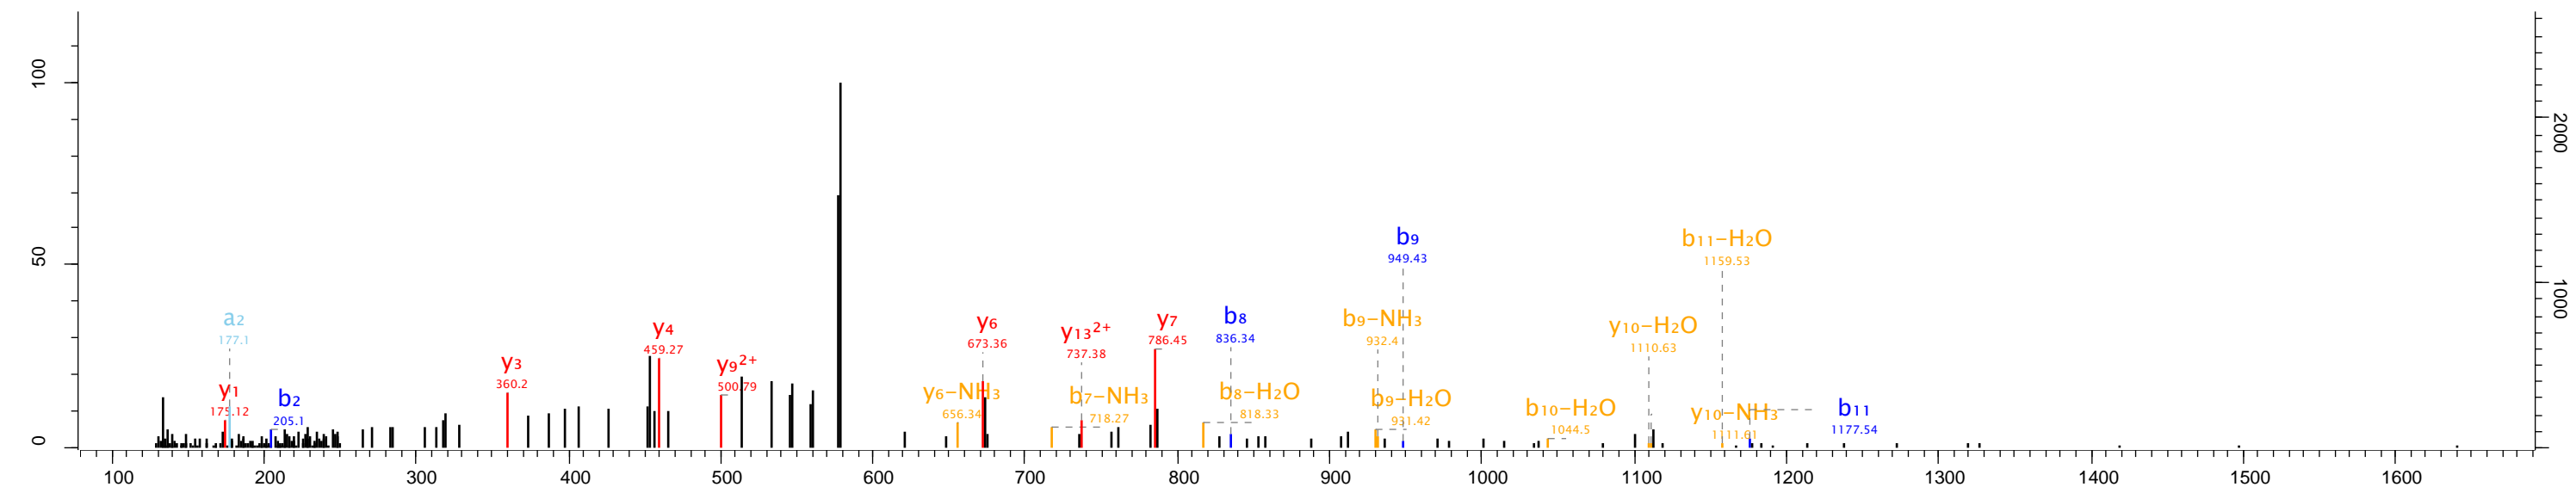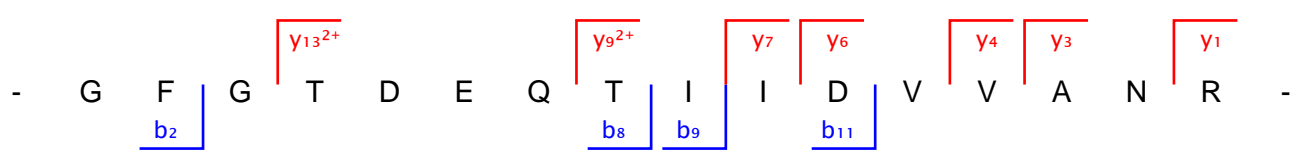

Spectral Annotation for Single-Peptide IDs in 16-cell Embryo using Q-OT-LIT

Raw file: 2015-01-05\_CL03\_XenEmb\_x2  
 Scan: 36955 Method: ITMS; HCD Score: 87.68 m/z: 602.65

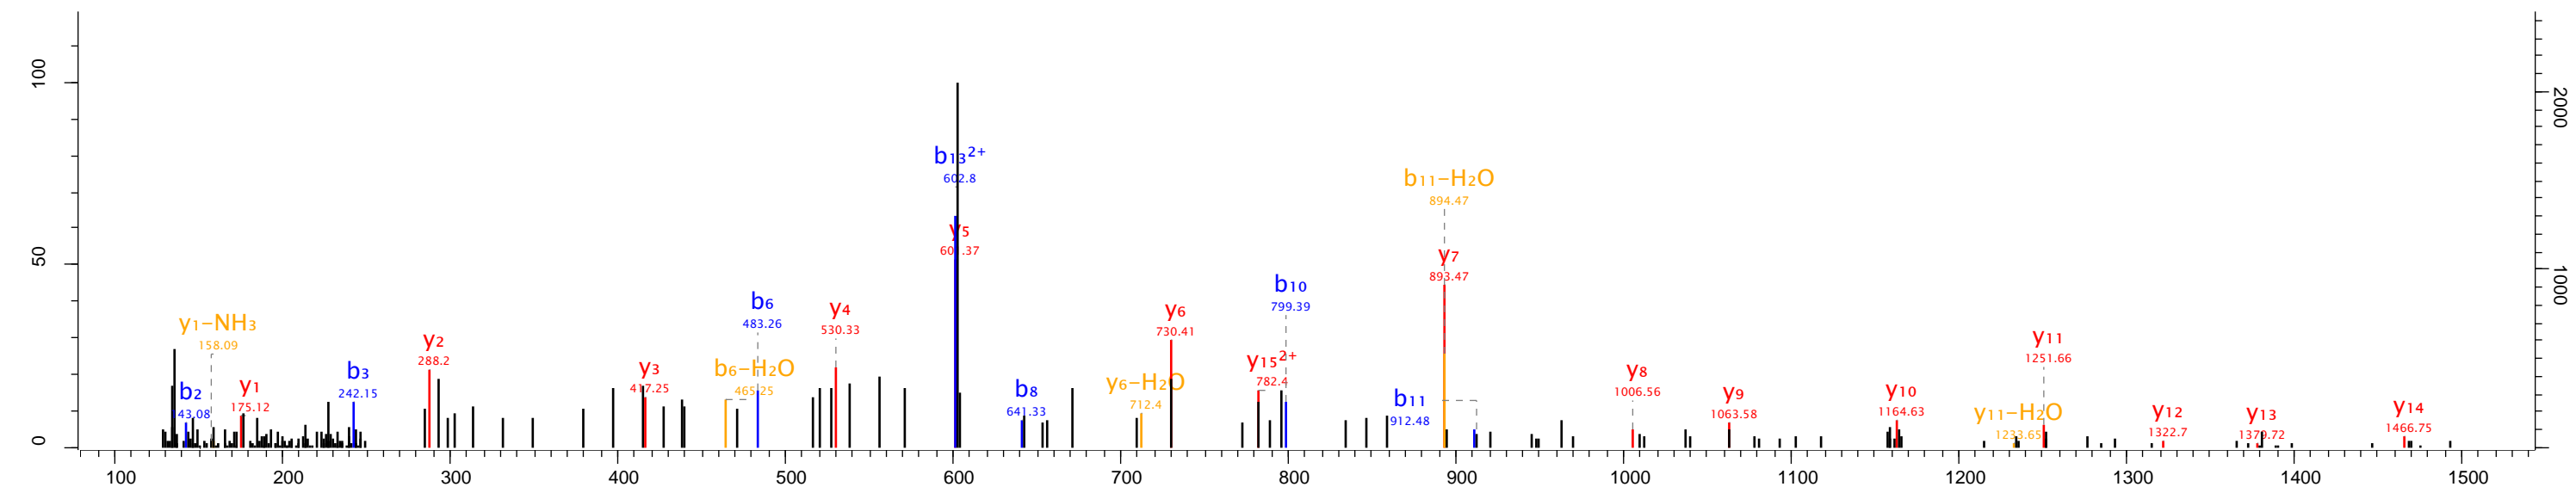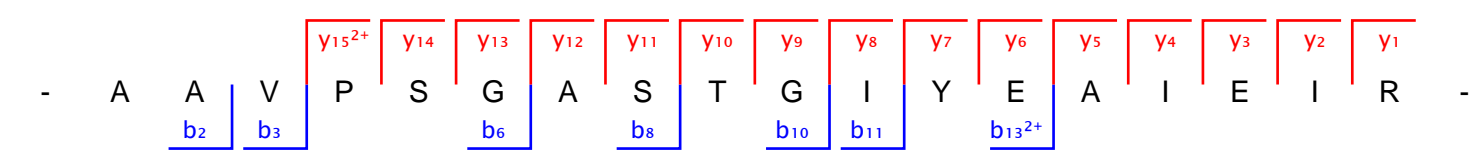

Spectral Annotation for Single-Peptide IDs in 16-cell Embryo using Q-OT-LIT

Raw file 2015-01-05\_CL03\_XenEmb\_x2 Scan 37460 Method ITMS; HCD Score 65.33 m/z 874.91

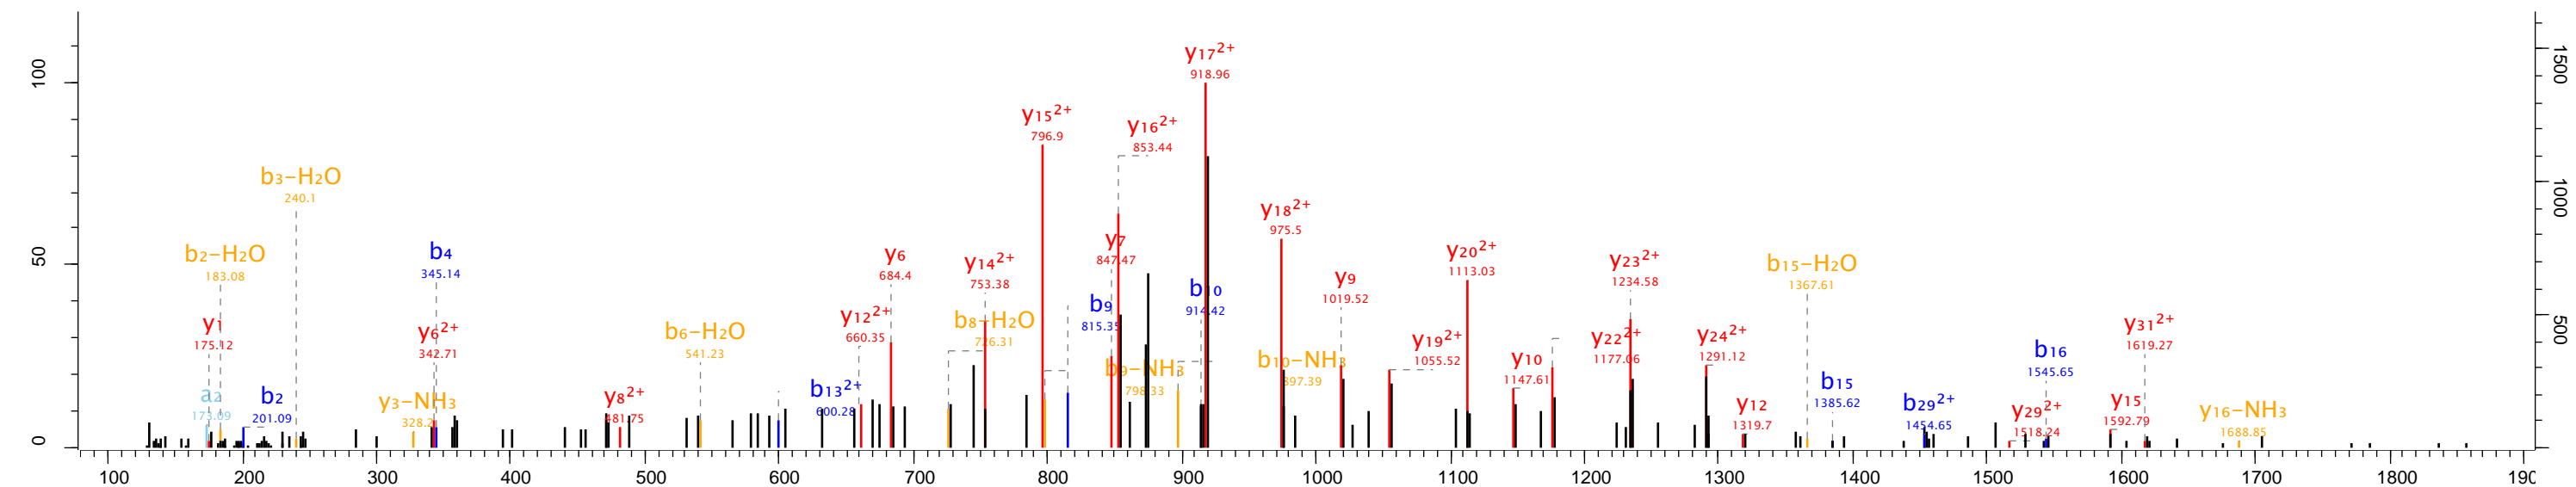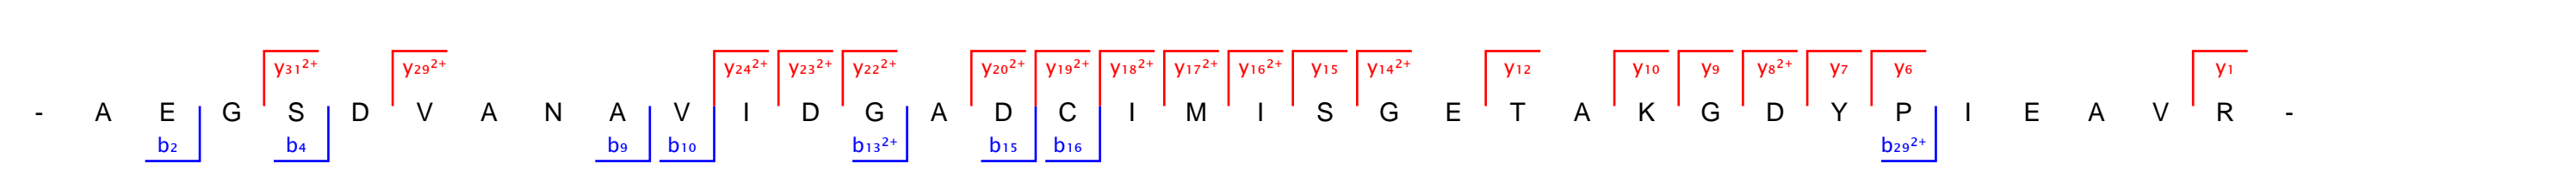

Raw file: 2015-01-05\_CL03\_XenEmb\_x2  
 Scan: 37529 Method: ITMS; HCD Score: 42.96 m/z: 946.99

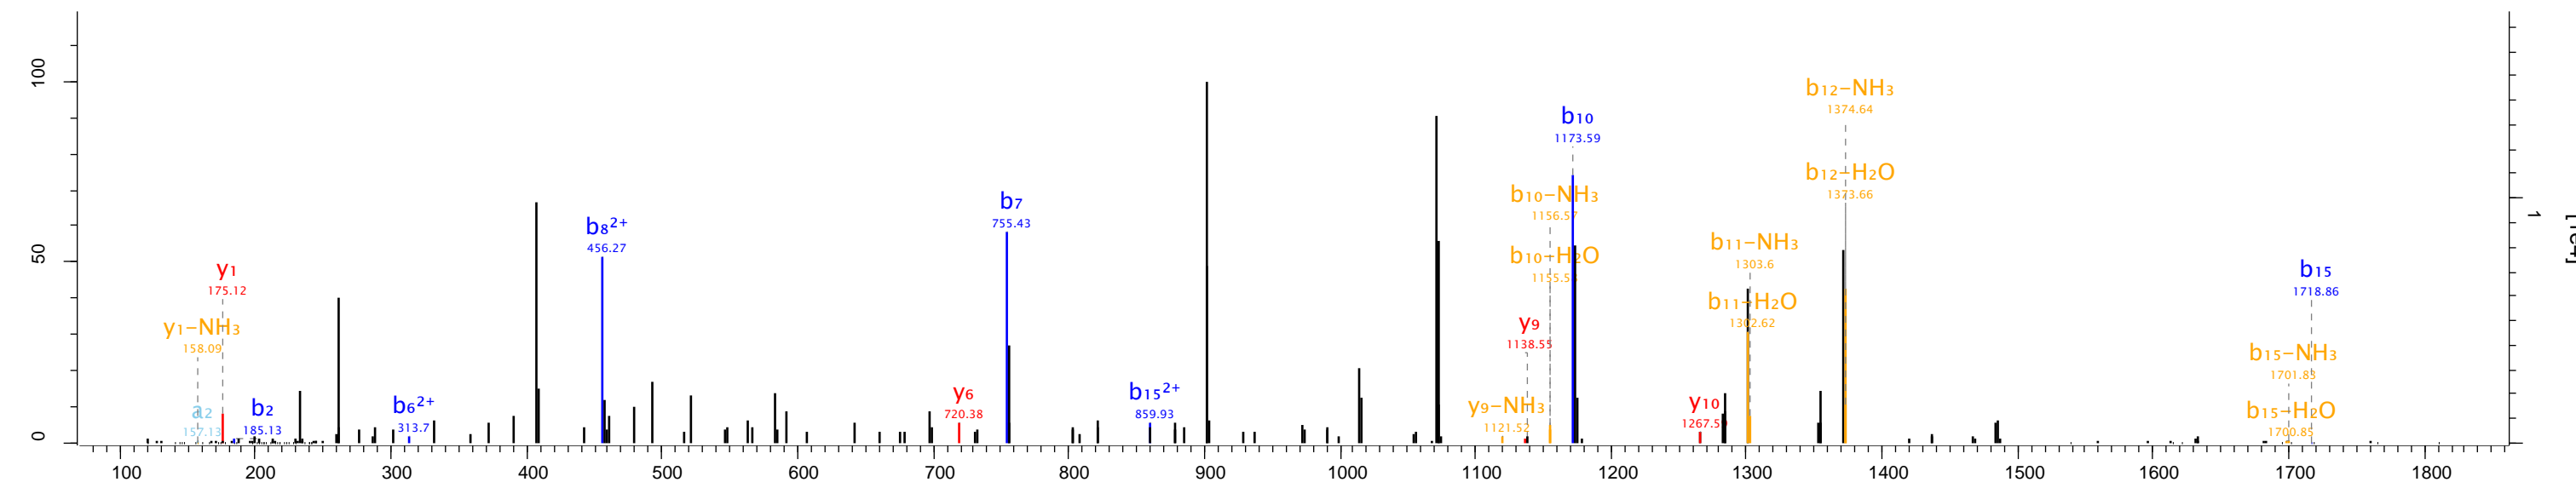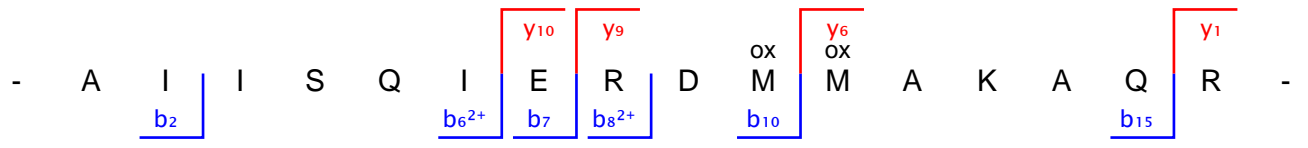

Spectral Annotation for Single-Peptide IDs in 16-cell Embryo using Q-OT-LIT

Raw file: 2015-01-05\_CL03\_XenEmb\_x2  
 Scan: 37538 Method: ITMS; HCD Score: 29.64 m/z: 874.66

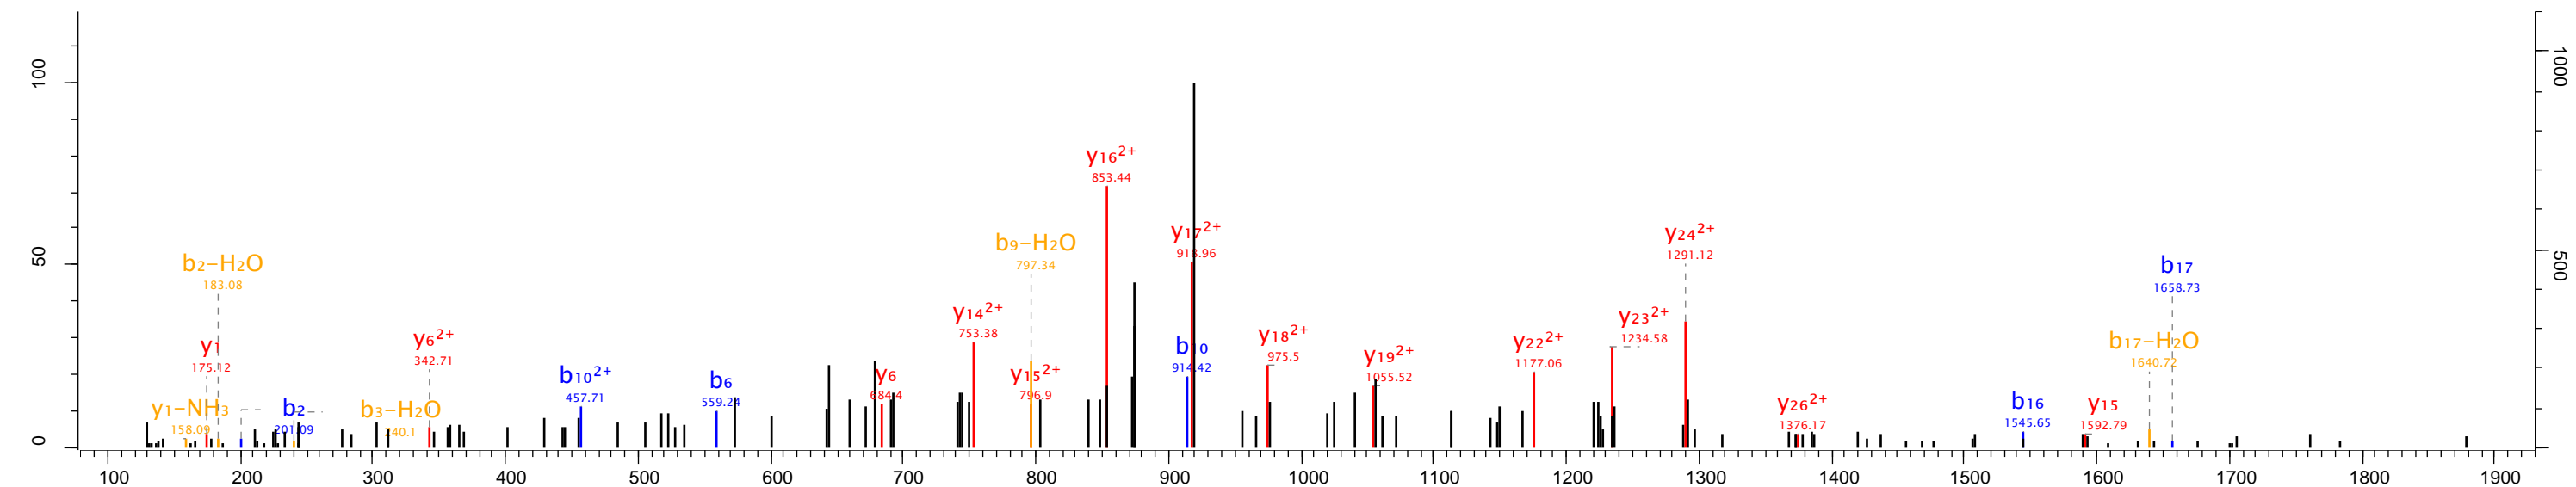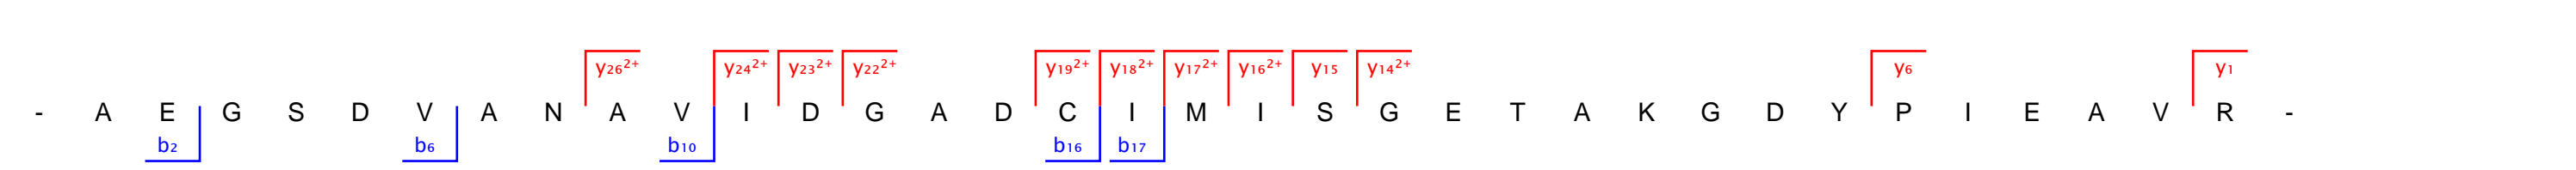



Raw file: 2015-01-05\_CL03\_XenEmb\_x2  
 Scan: 37588  
 Method: ITMS; HCD  
 Score: 24.8  
 m/z: 874.66

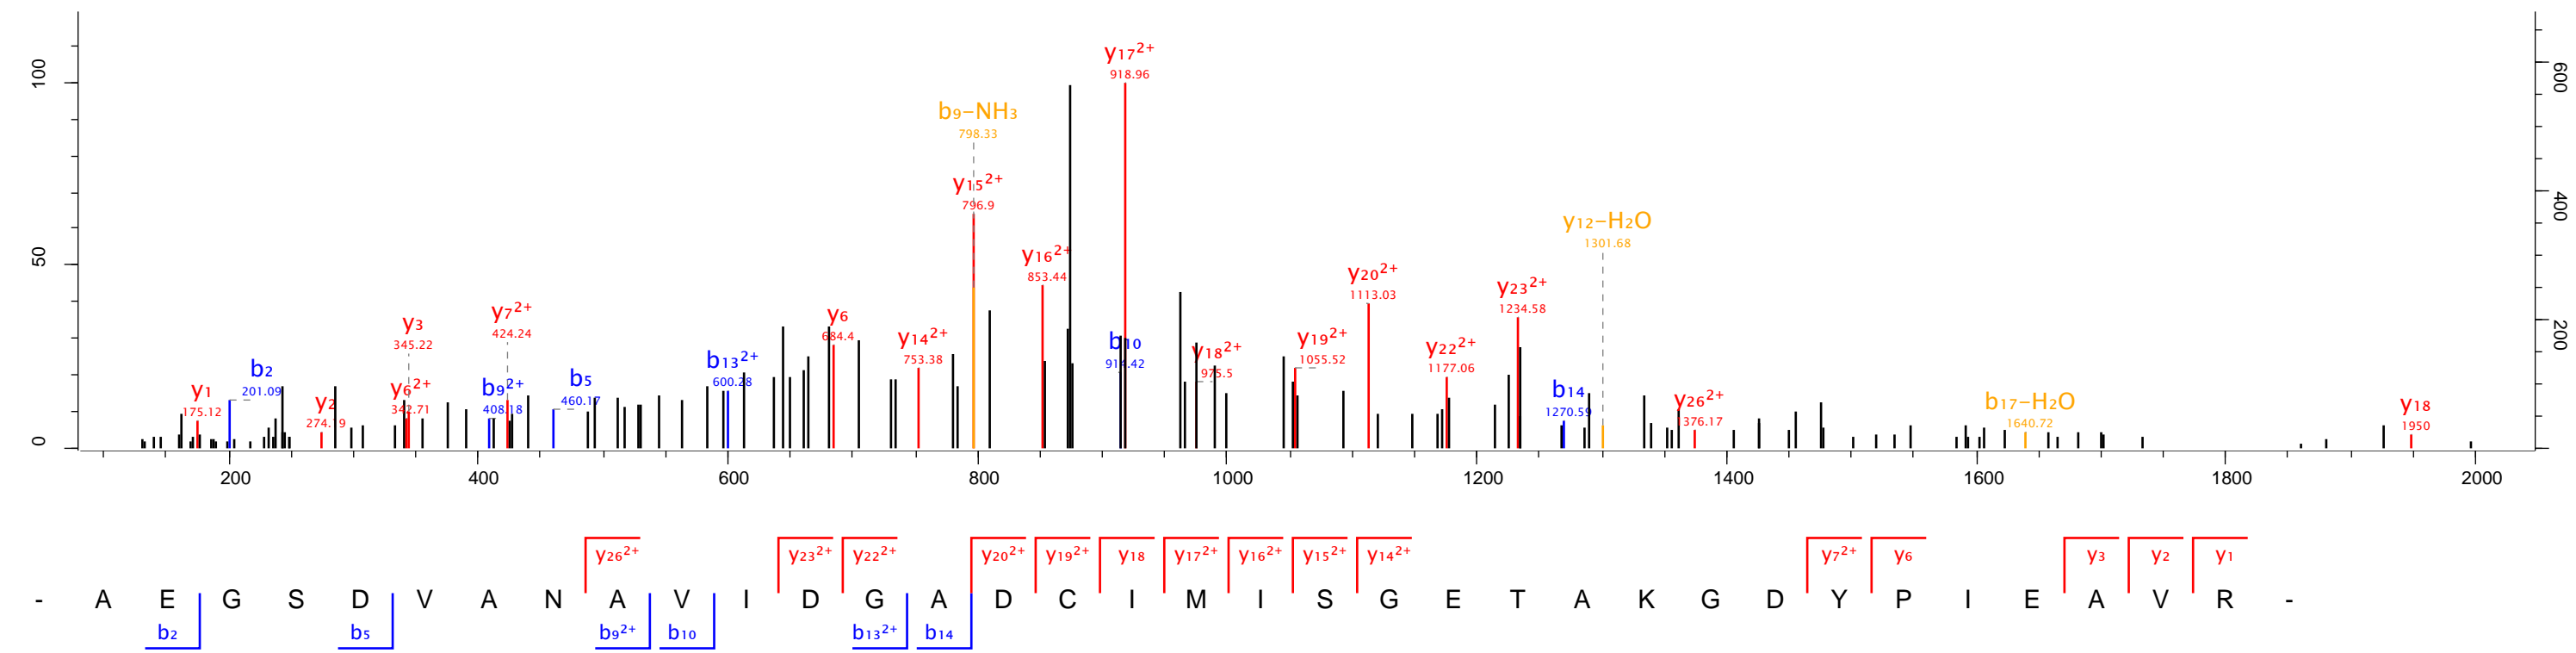

Spectral Annotation for Single-Peptide IDs in 16-cell Embryo using Q-OT-LIT

Raw file 2015-01-05\_CL03\_XenEmb\_x2 Scan 38870 Method ITMS; HCD Score 50.87 m/z 667.36

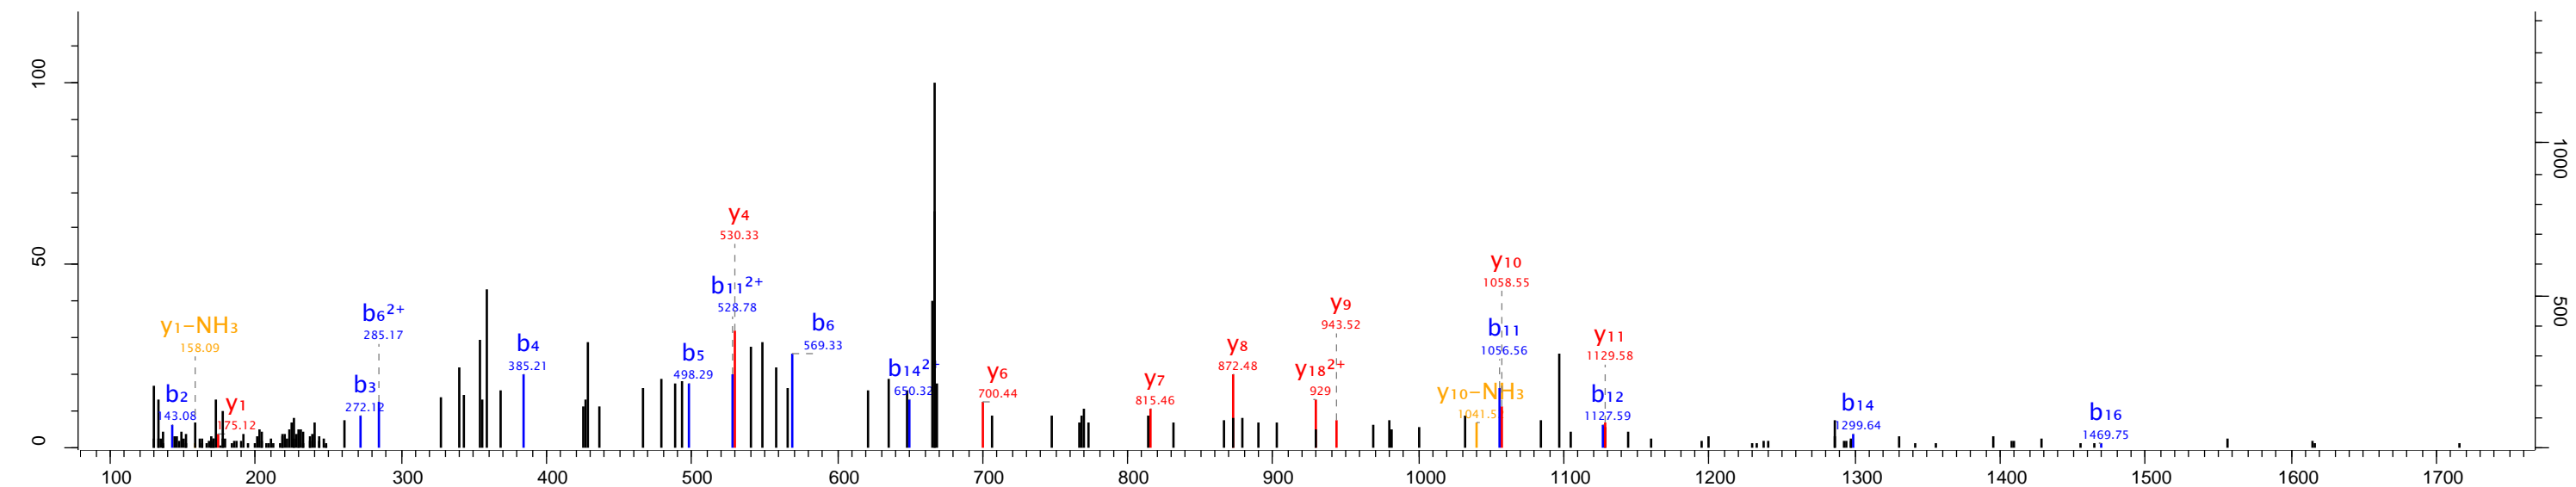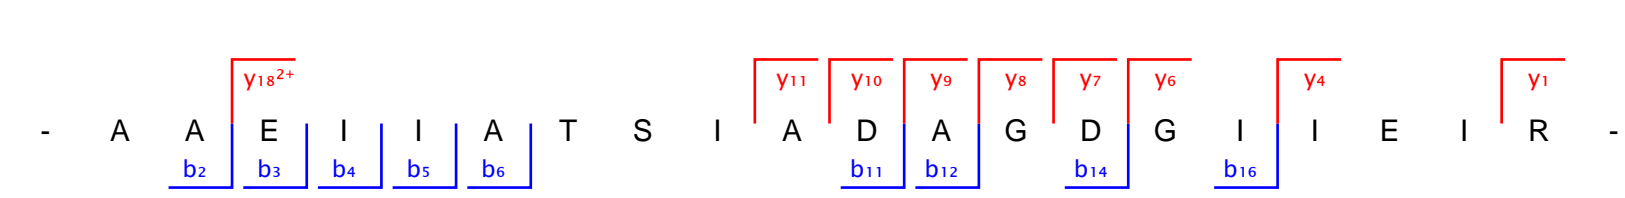

Raw file 2015-01-05\_CL03\_XenEmb\_x2 Scan 39332 Method ITMS; HCD Score 39.65 m/z 705.38

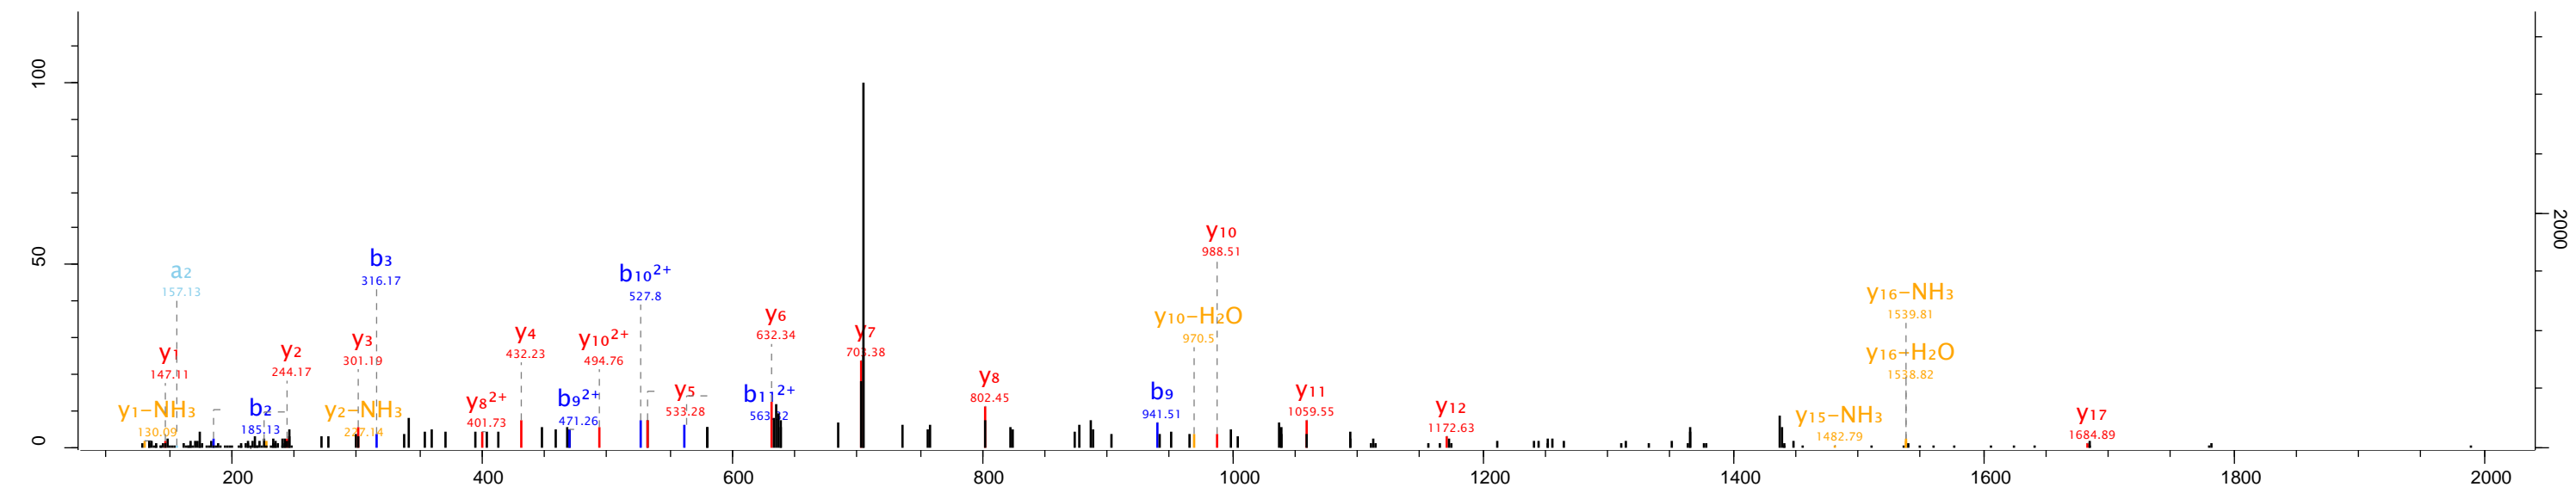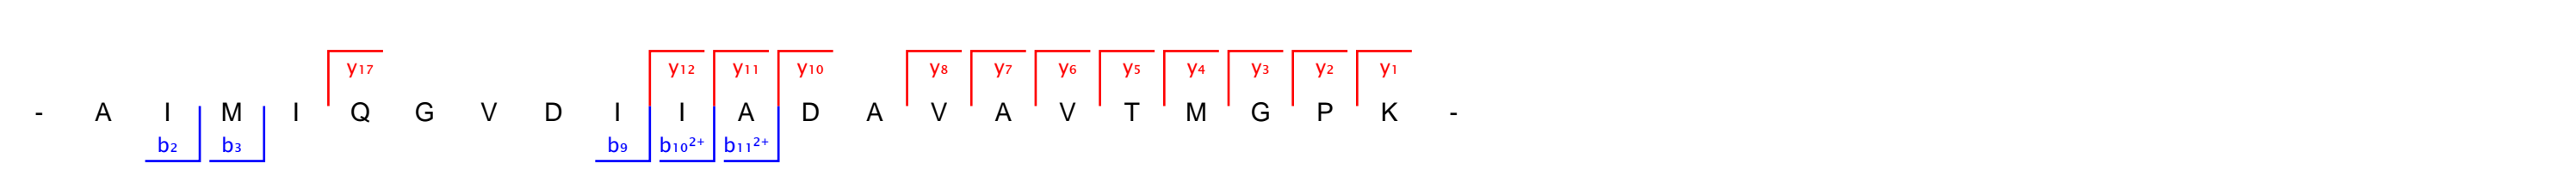

Raw file 2015-01-05\_CL03\_XenEmb\_x2  
 Scan 39373 Method ITMS; HCD Score 83.17 m/z 705.39

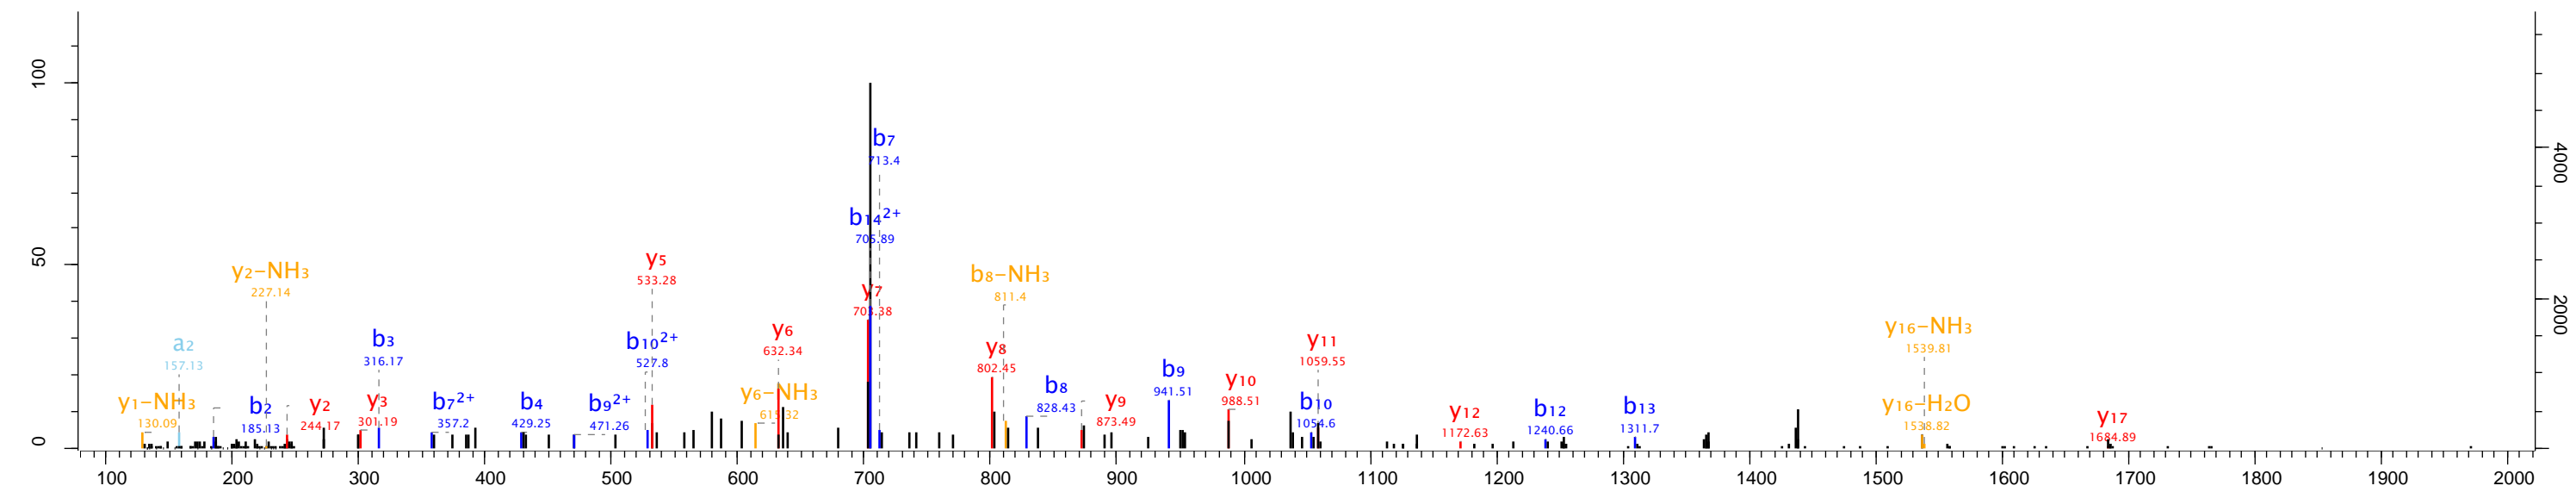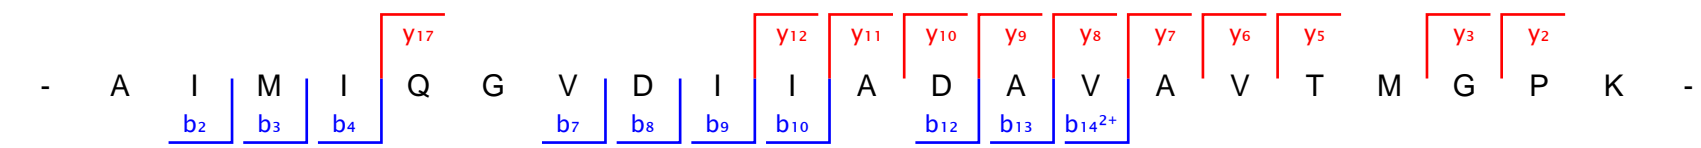

Spectral Annotation for Single-Peptide IDs in 16-cell Embryo using Q-OT-LIT

Raw file: 2015-01-05\_CL03\_XenEmb\_x2  
 Scan: 39382 Method: ITMS; HCD Score: 52.72 m/z: 678.36

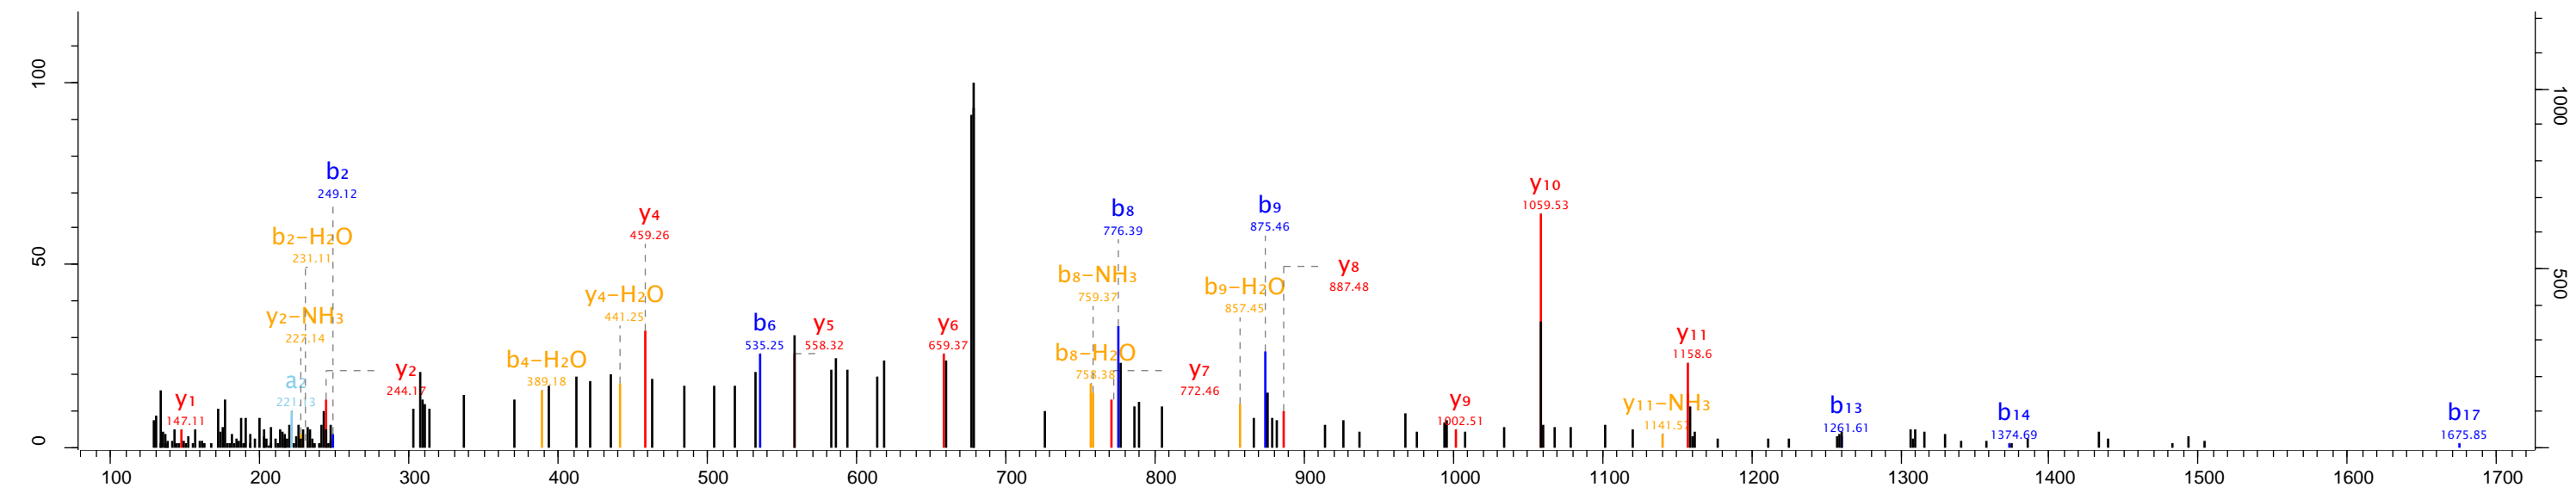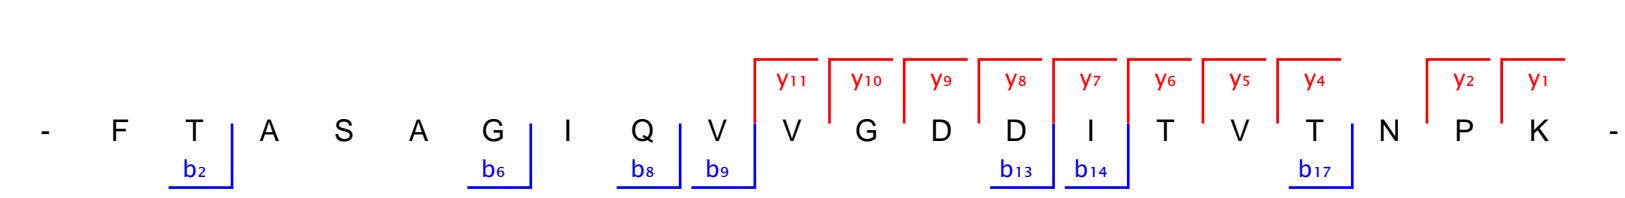

Raw file: 2015-01-05\_CL03\_XenEmb\_x2  
 Scan: 39385 Method: ITMS; HCD Score: 75.06 m/z: 705.38

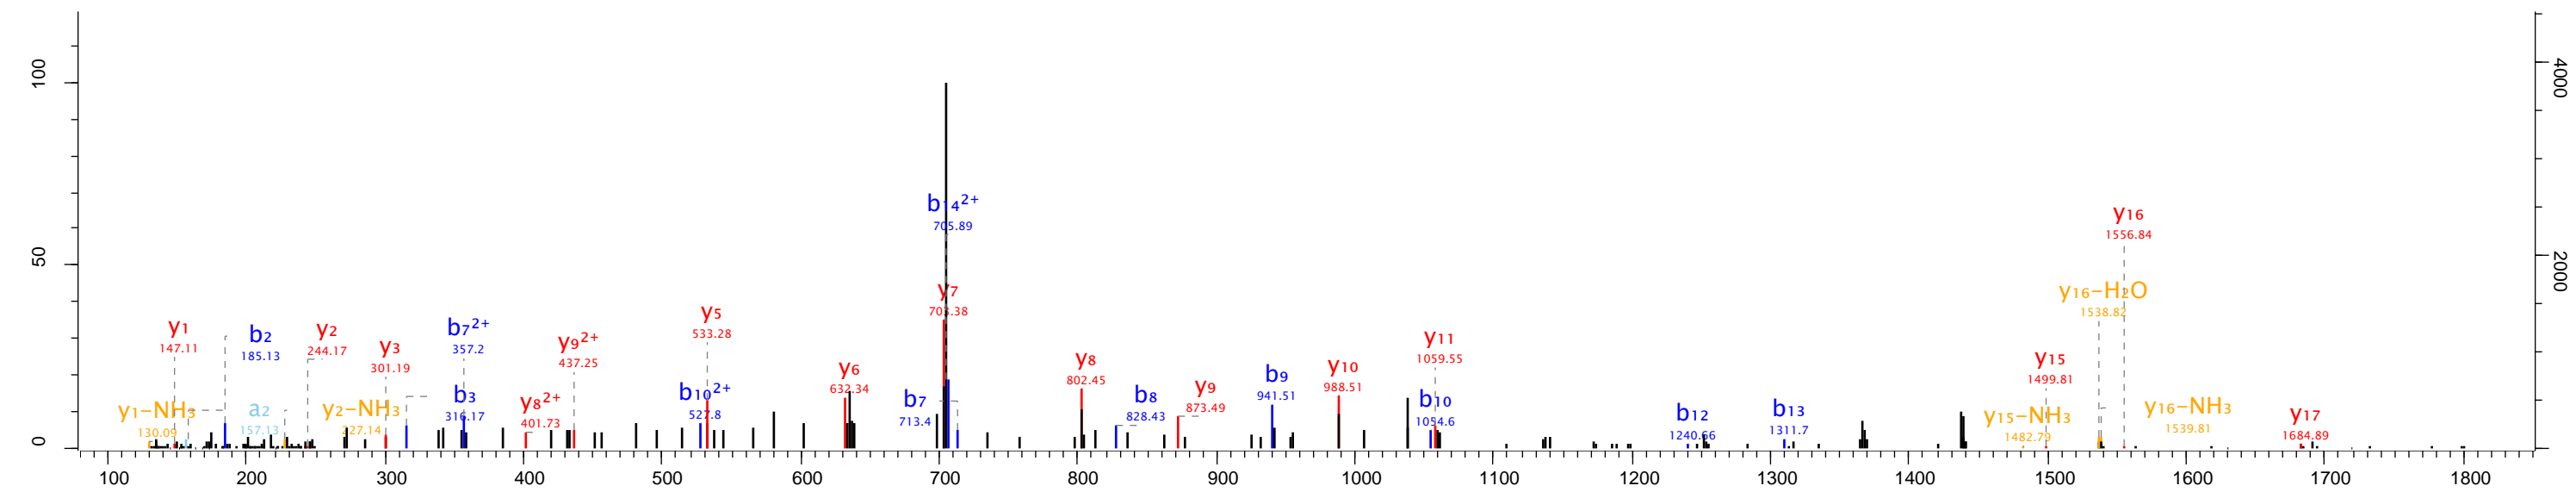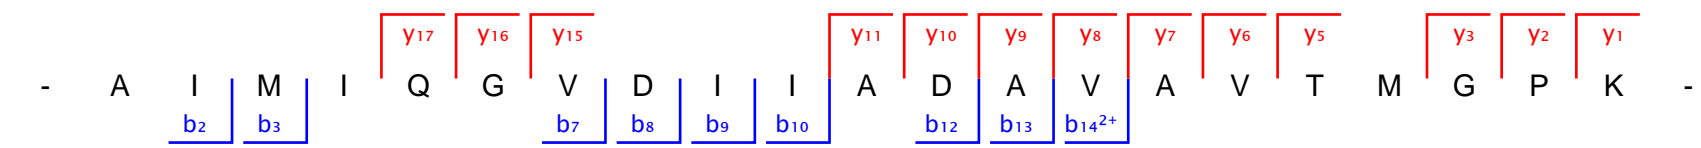

Spectral Annotation for Single-Peptide IDs in 16-cell Embryo using Q-OT-LIT

Raw file: 2015-01-05\_CL03\_XenEmb\_x2  
 Scan: 39392 Method: ITMS; HCD Score: 47.15 m/z: 678.69

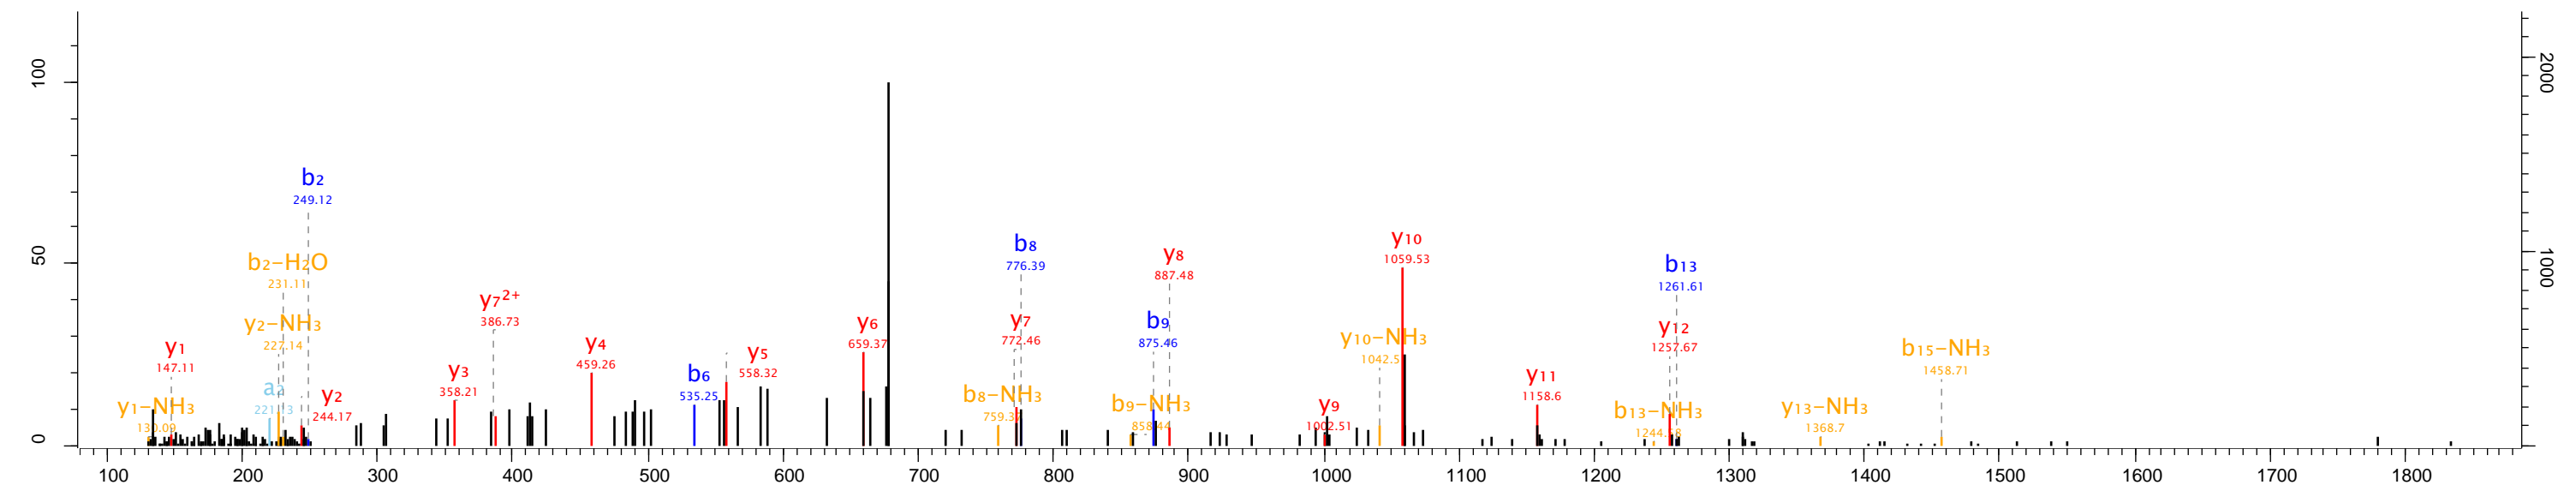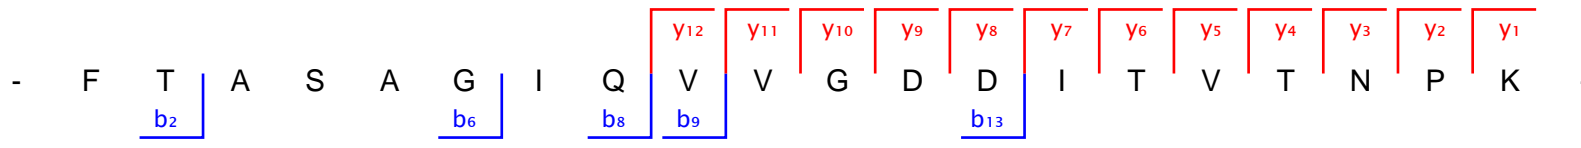

Raw file 2015-01-05\_CL03\_XenEmb\_x2 Scan 39629 Method ITMS; HCD Score 100.28 m/z 705.05

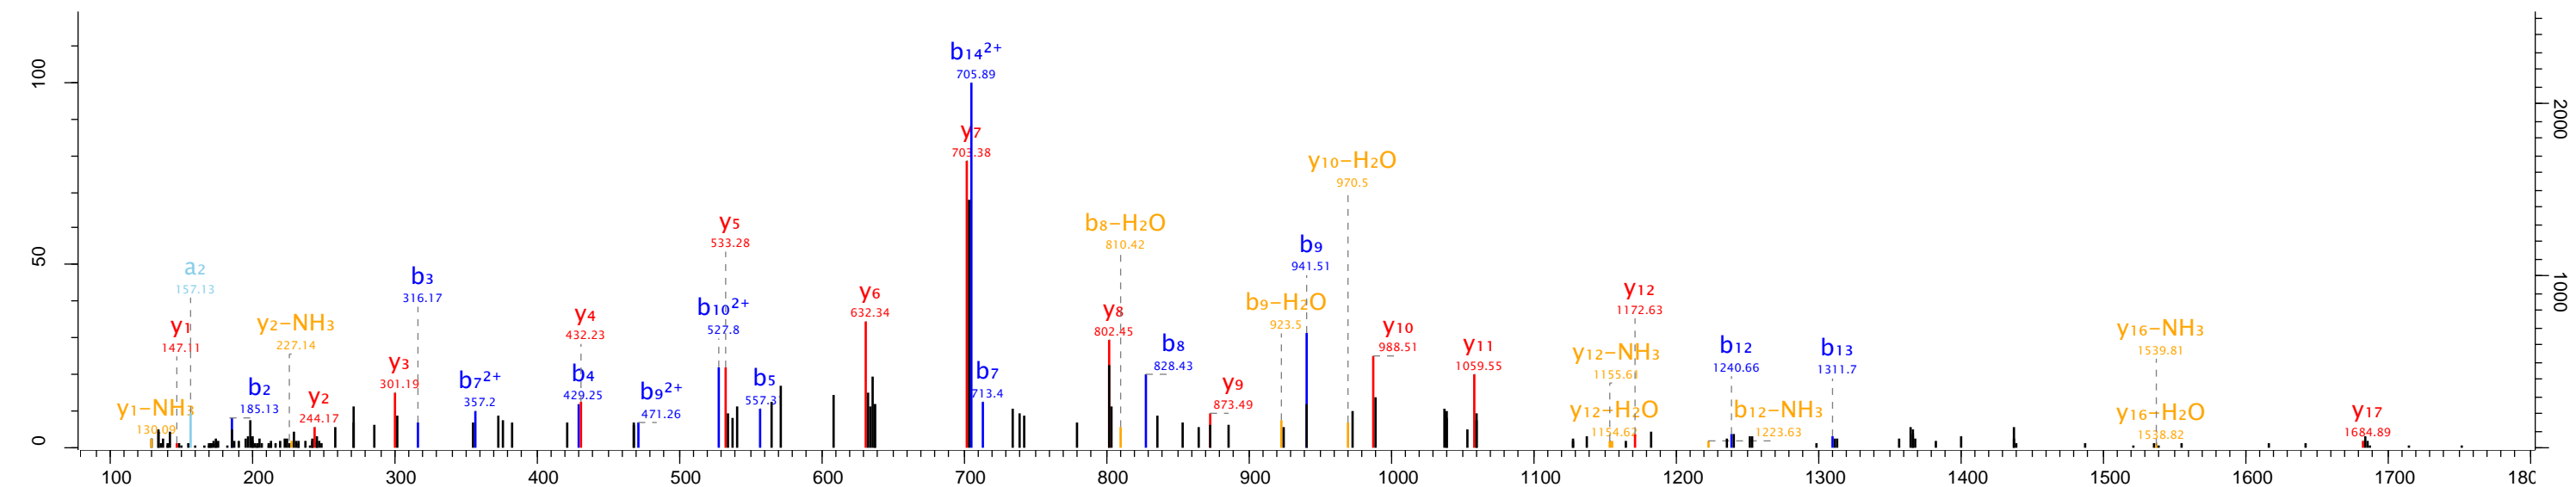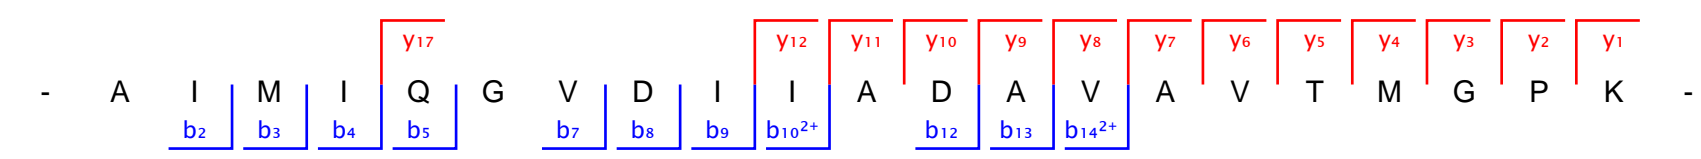



Raw file: 2015-01-05\_CL03\_XenEmb\_x2  
 Scan: 39713 Method: ITMS; HCD Score: 60.31 m/z: 639

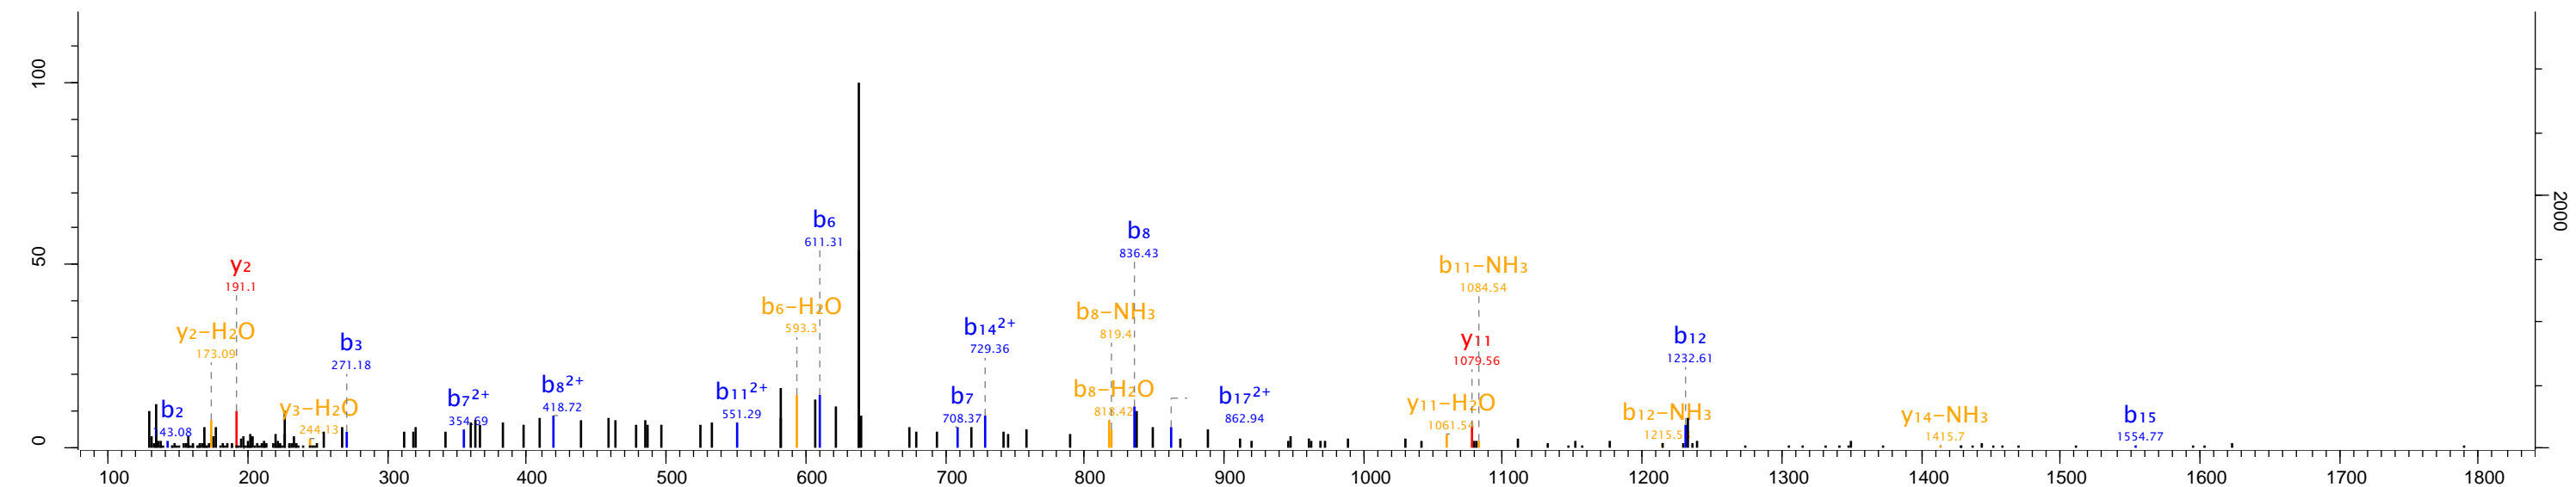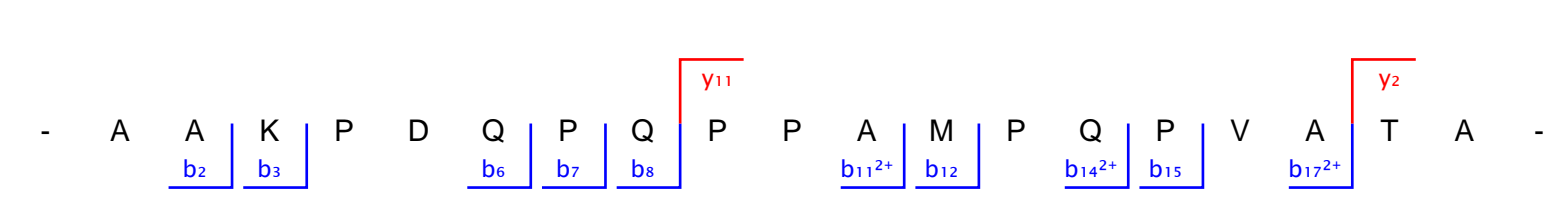

Raw file 2015-01-05\_CL03\_XenEmb\_x2 Scan 39721 Method ITMS; HCD Score 72.43 m/z 639.33

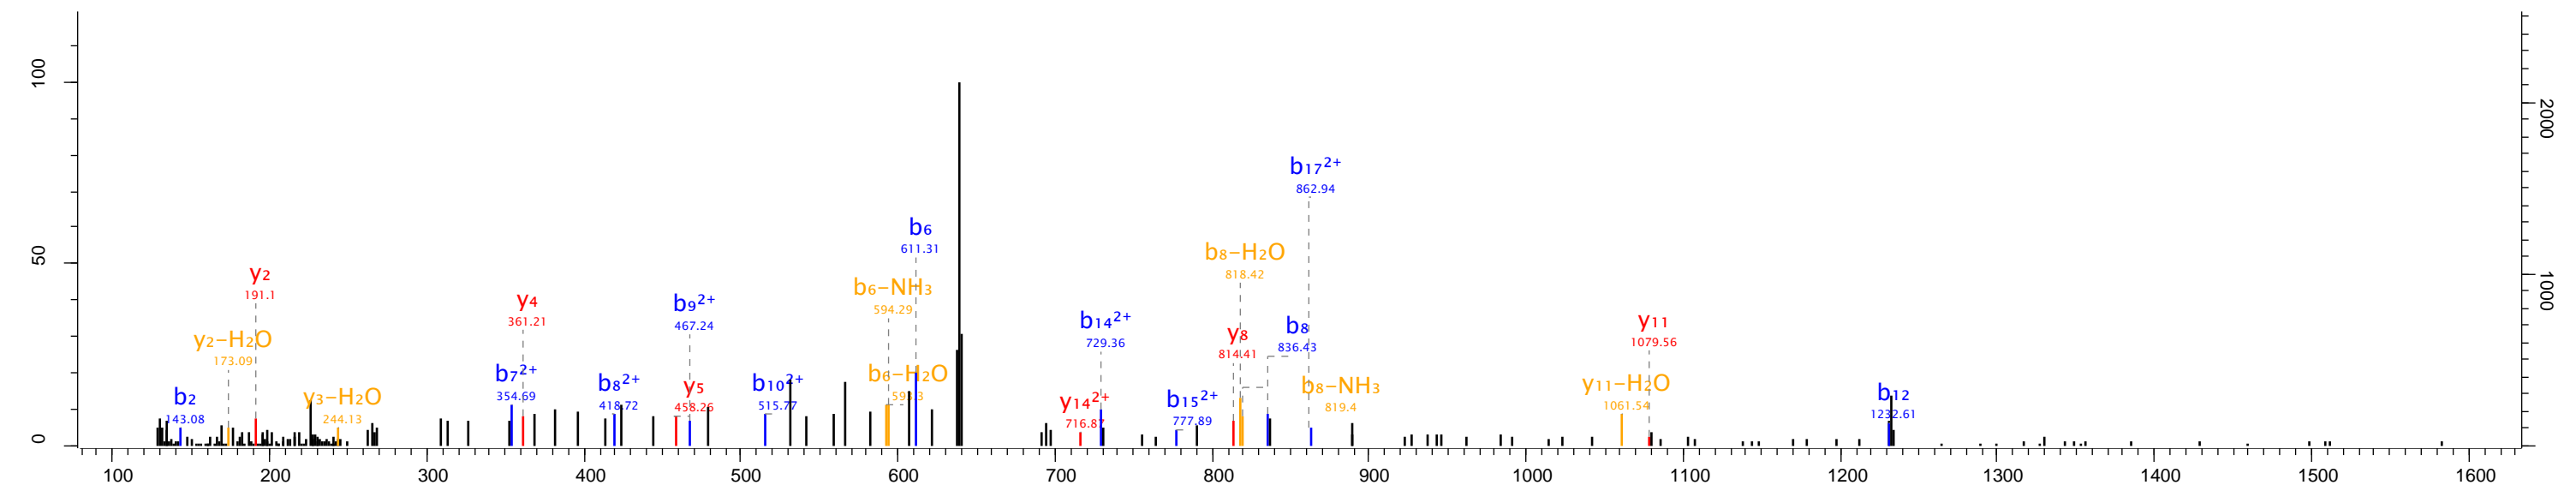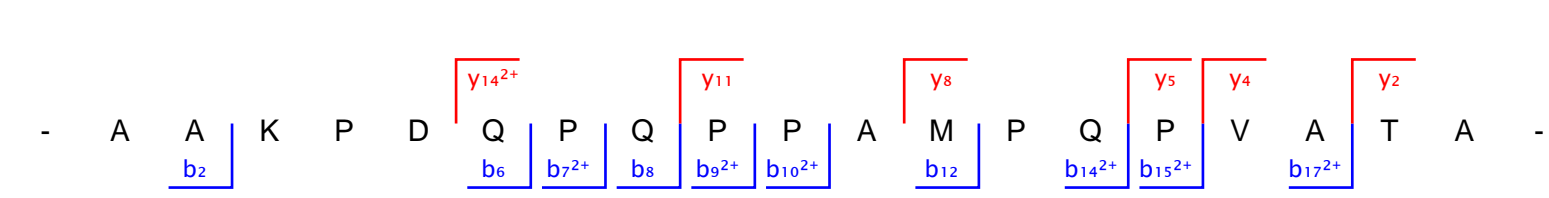

Raw file 2015-01-05\_CL03\_XenEmb\_x2 Scan 40214 Method ITMS; HCD Score 40.72 m/z 1094

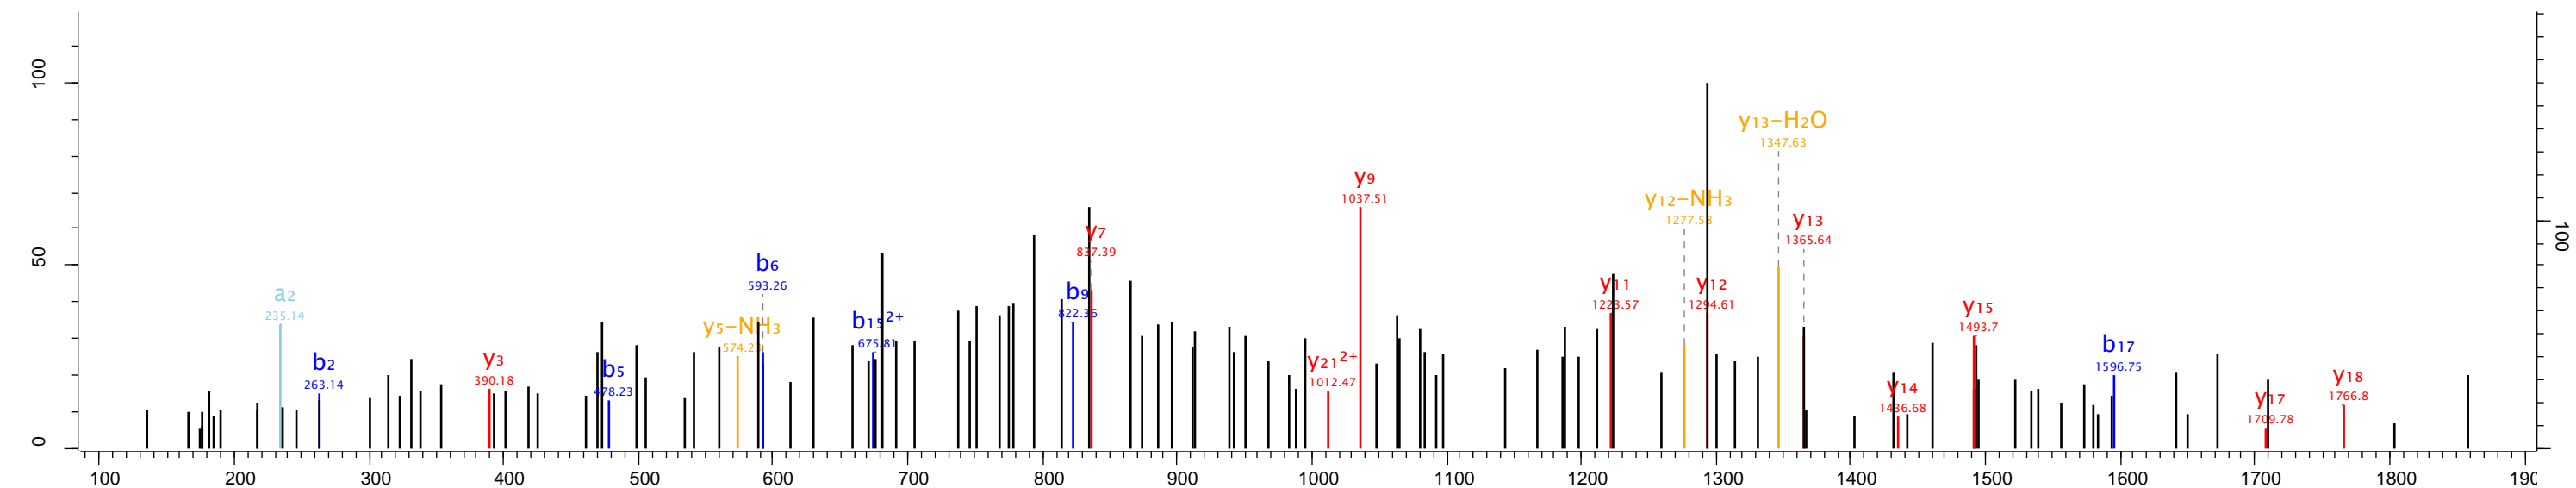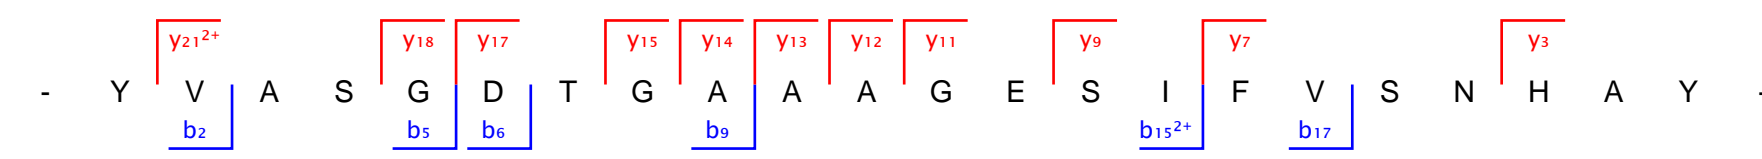

Raw file: 2015-01-05\_CL03\_XenEmb\_x2  
 Scan: 40252 Method: ITMS; HCD Score: 39.66 m/z: 729.67

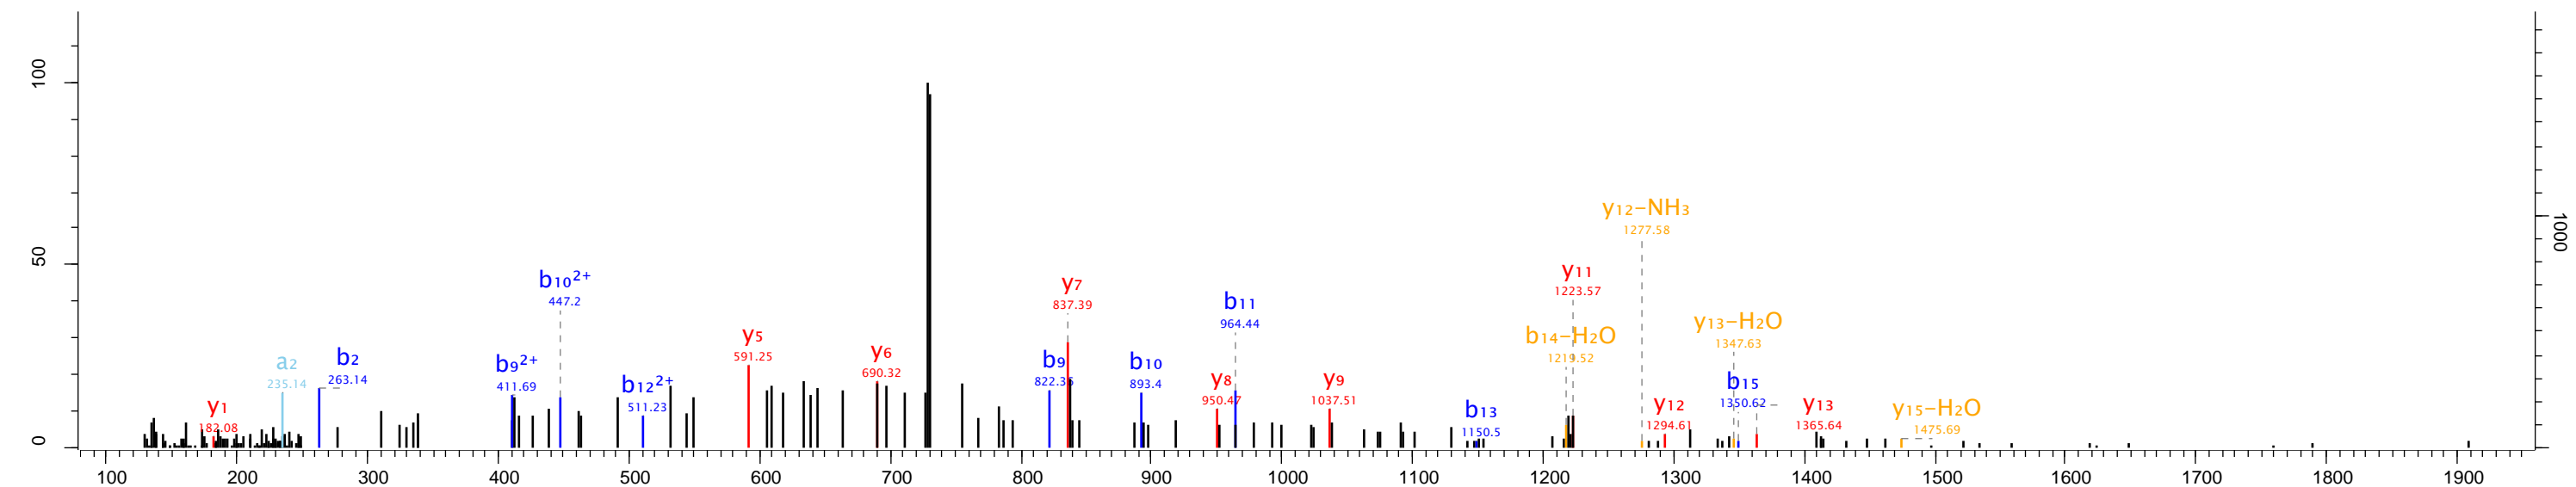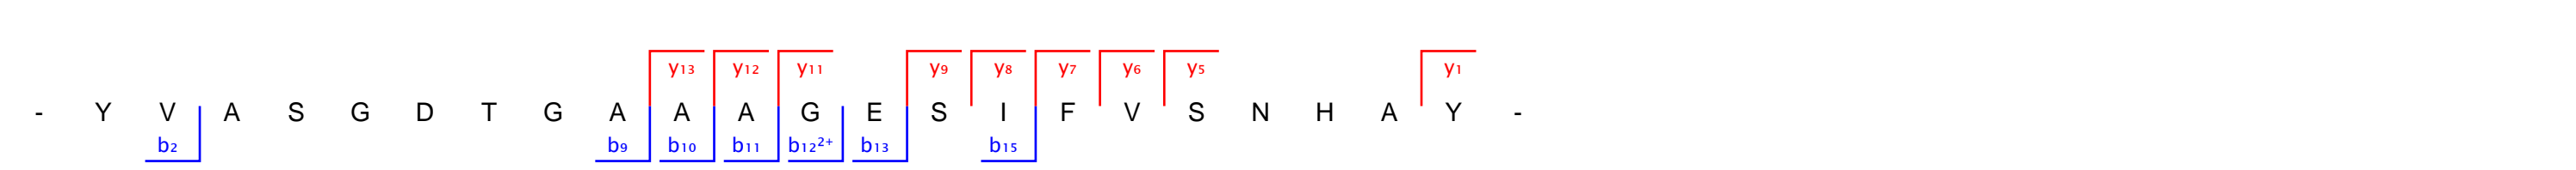

Raw file 2015-01-05\_CL03\_XenEmb\_x2  
 Scan 40261 Method ITMS; HCD Score 38.2 m/z 729.67

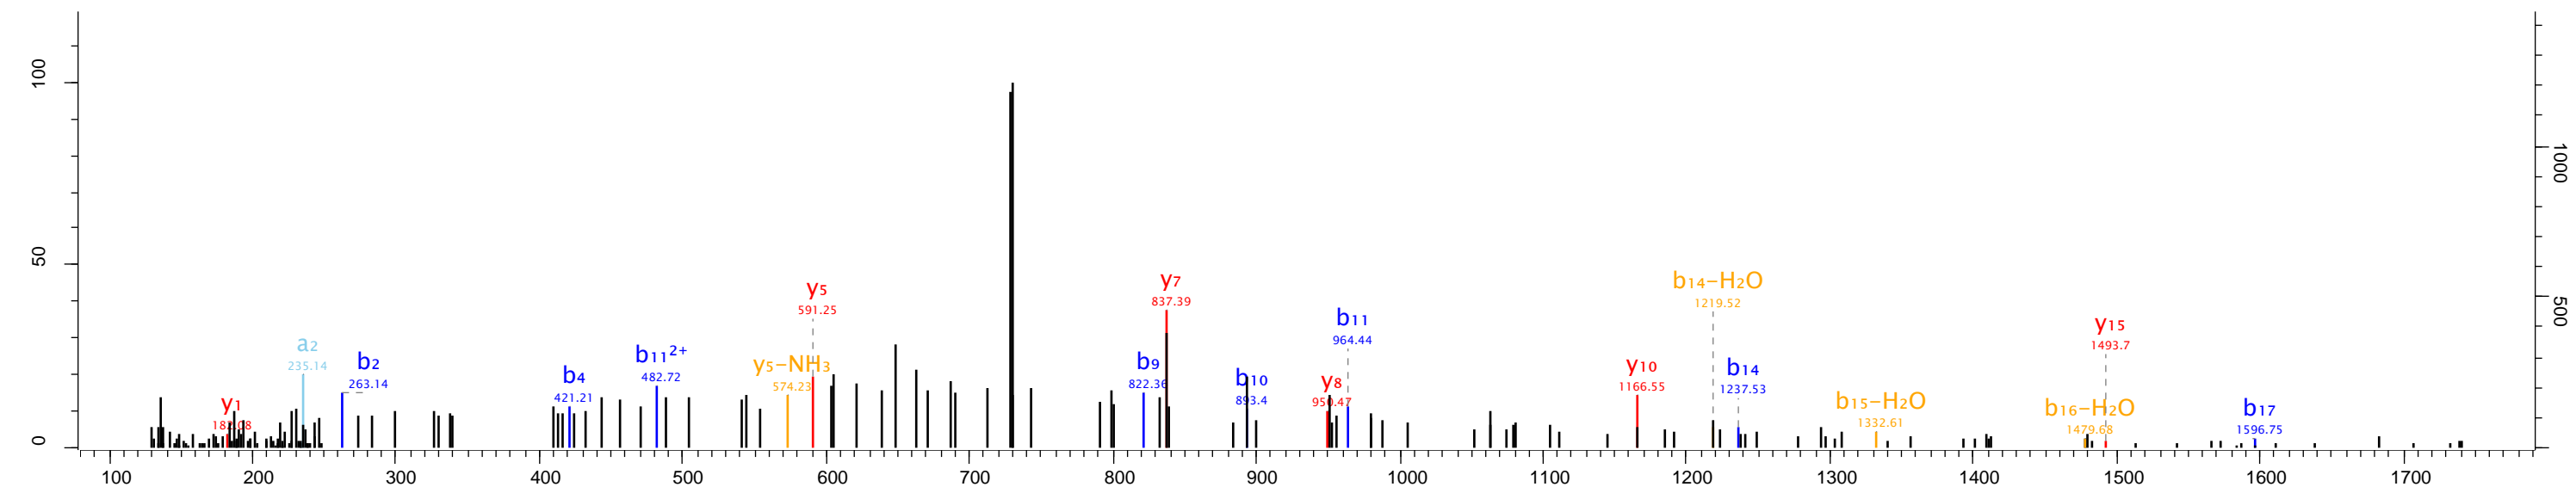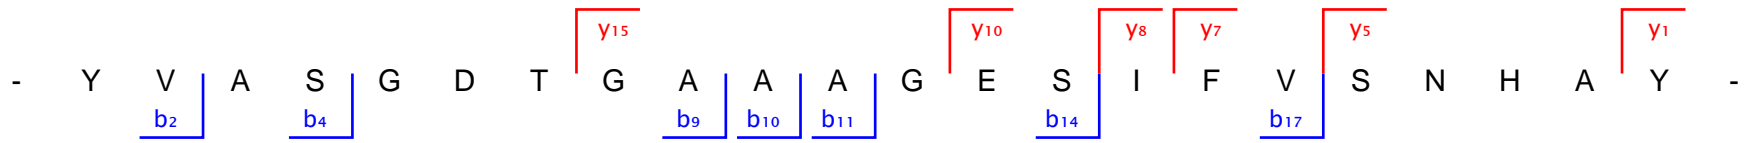

Raw file: 2015-01-05\_CL03\_XenEmb\_x2  
 Scan: 40269 Method: ITMS; HCD Score: 48.35 m/z: 730

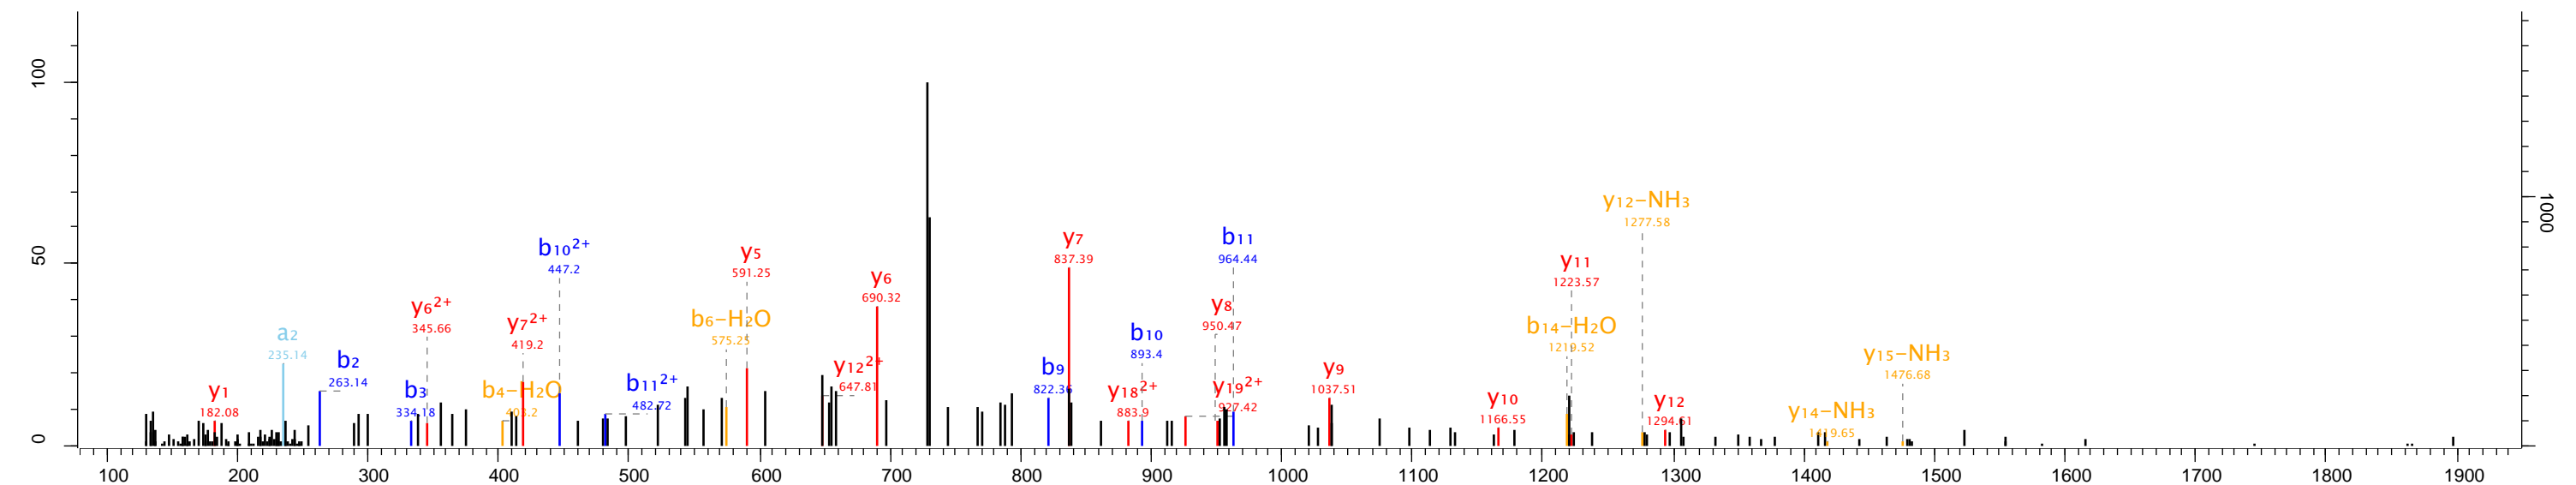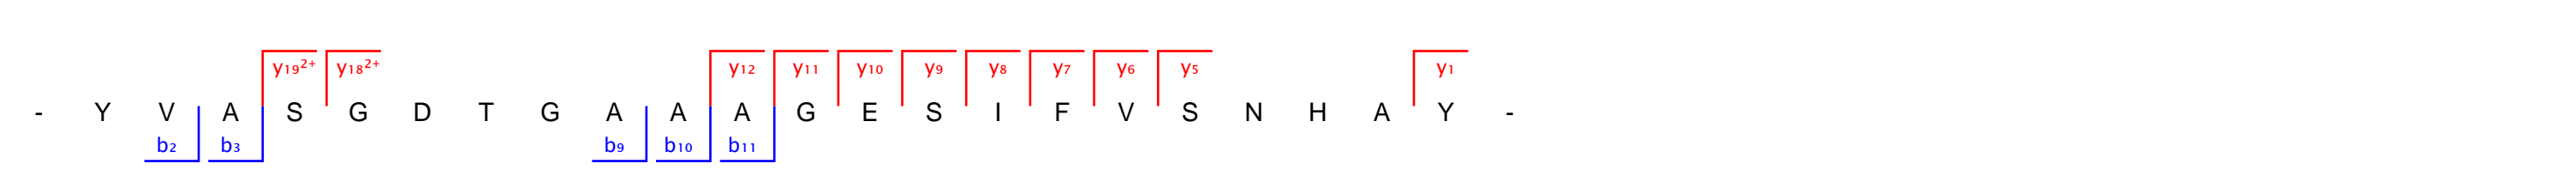

Raw file: 2015-01-05\_CL03\_XenEmb\_x2  
 Scan: 40481 Method: ITMS; HCD Score: 52.16 m/z: 758.38

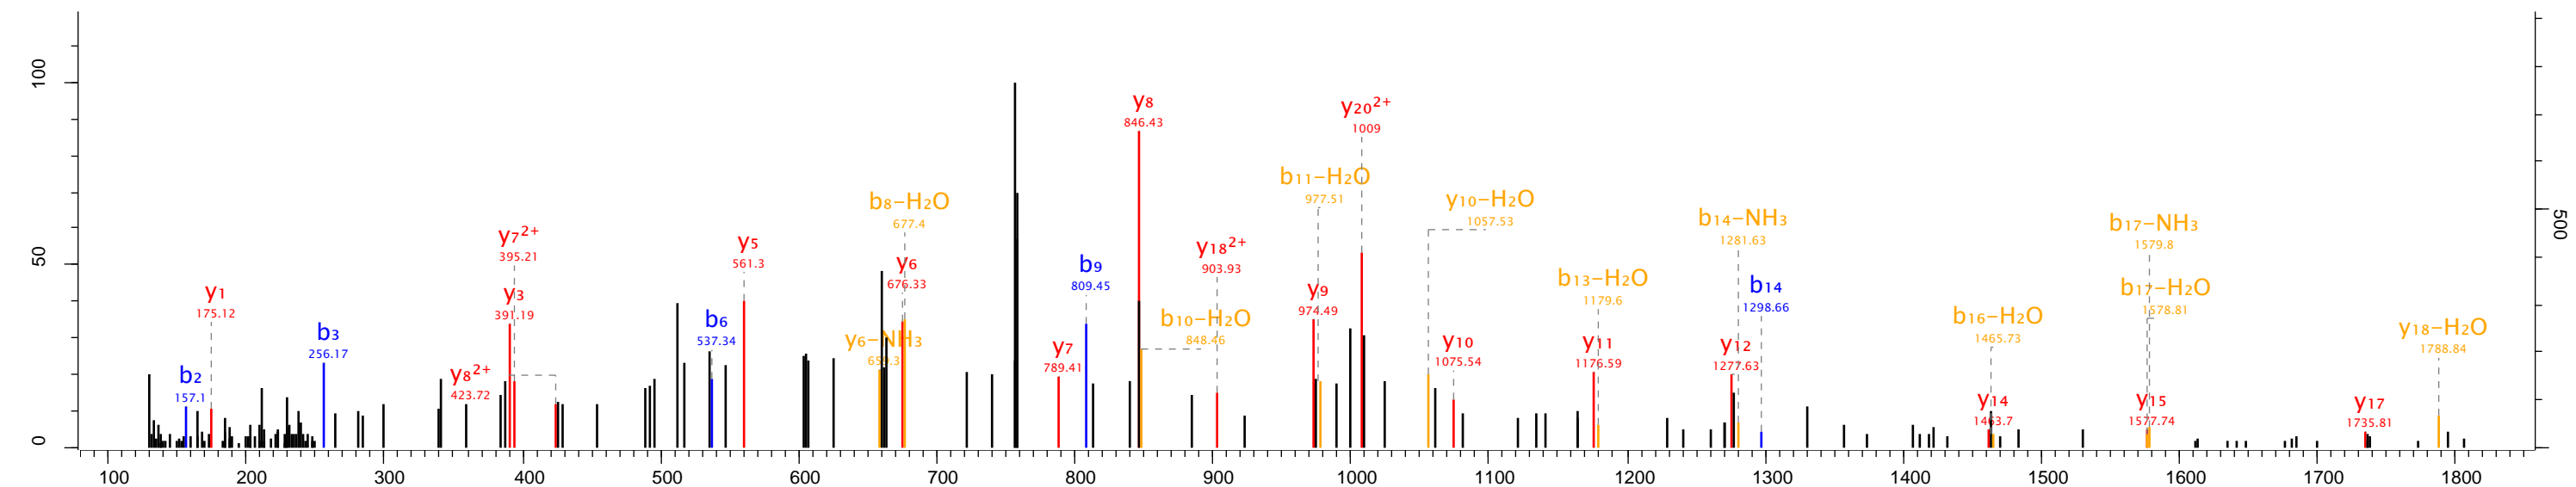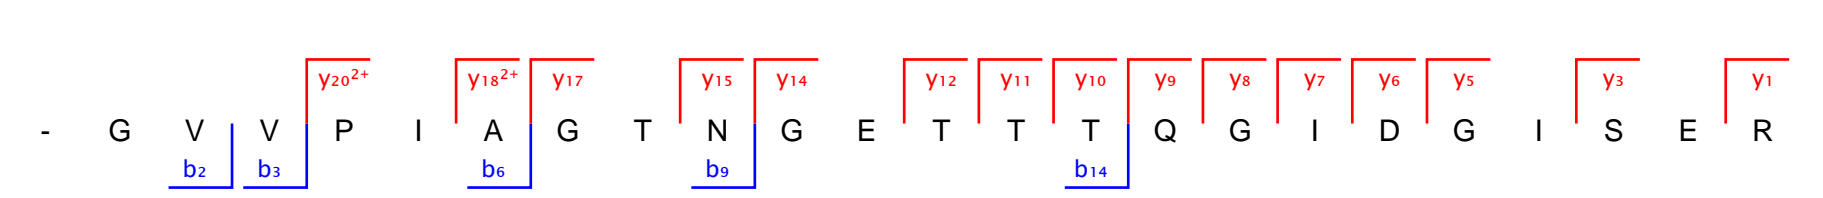

Raw file: 2015-01-05\_CL03\_XenEmb\_x2  
 Scan: 41145  
 Method: ITMS; HCD  
 Score: 30.71  
 m/z: 1149.53

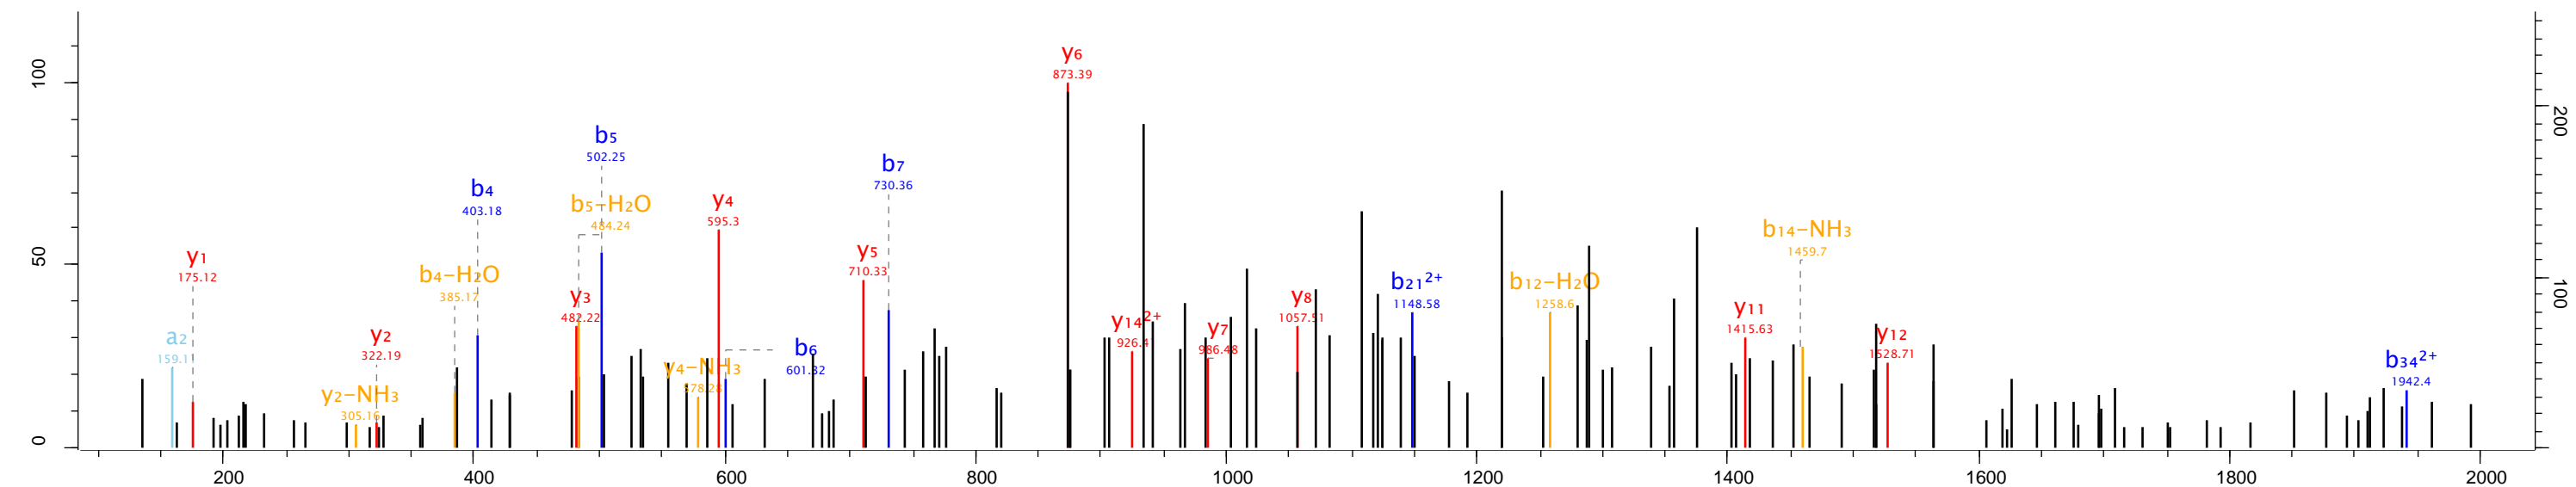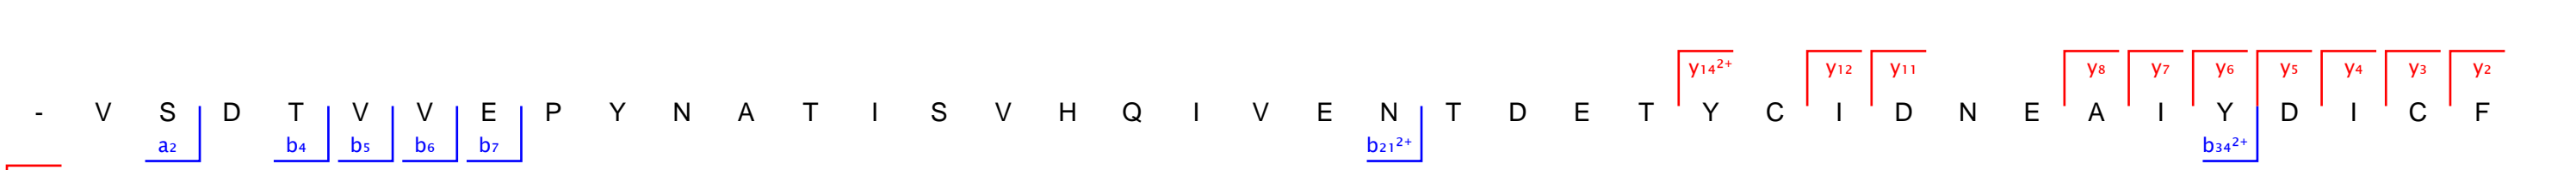

R - Spectral Annotation for Single-Peptide IDs in 16-cell Embryo using Q-OT-LIT



Raw file: 2015-01-05\_CL03\_XenEmb\_x2  
 Scan: 42315  
 Method: ITMS; HCD  
 Score: 45.3  
 m/z: 858.42

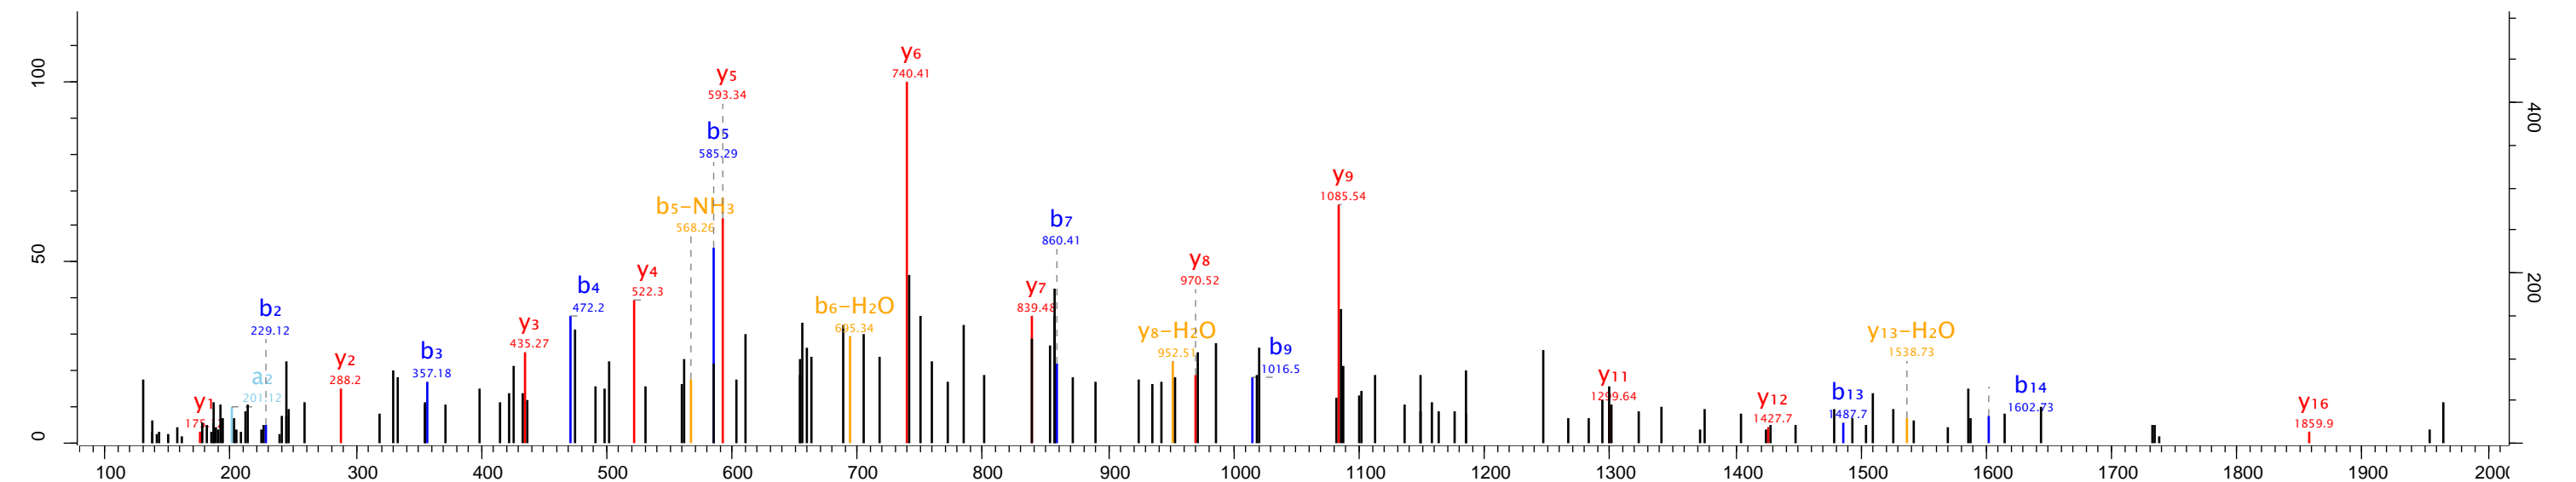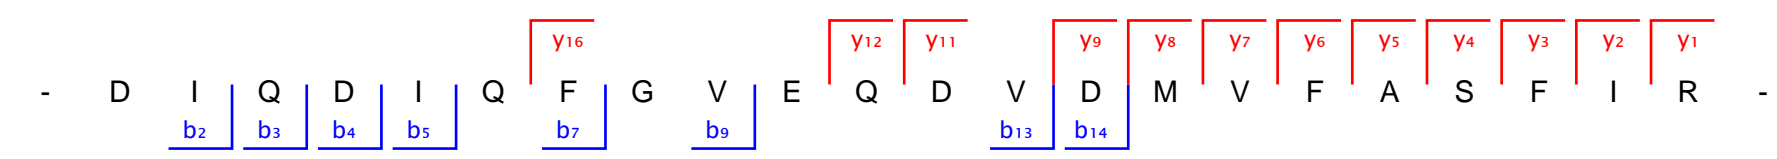

Spectral Annotation for Single-Peptide IDs in 16-cell Embryo using Q-OT-LIT

Raw file: 2015-01-05\_CL03\_XenEmb\_x2  
 Scan: 42438 Method: ITMS; HCD Score: 45.42 m/z: 858.08

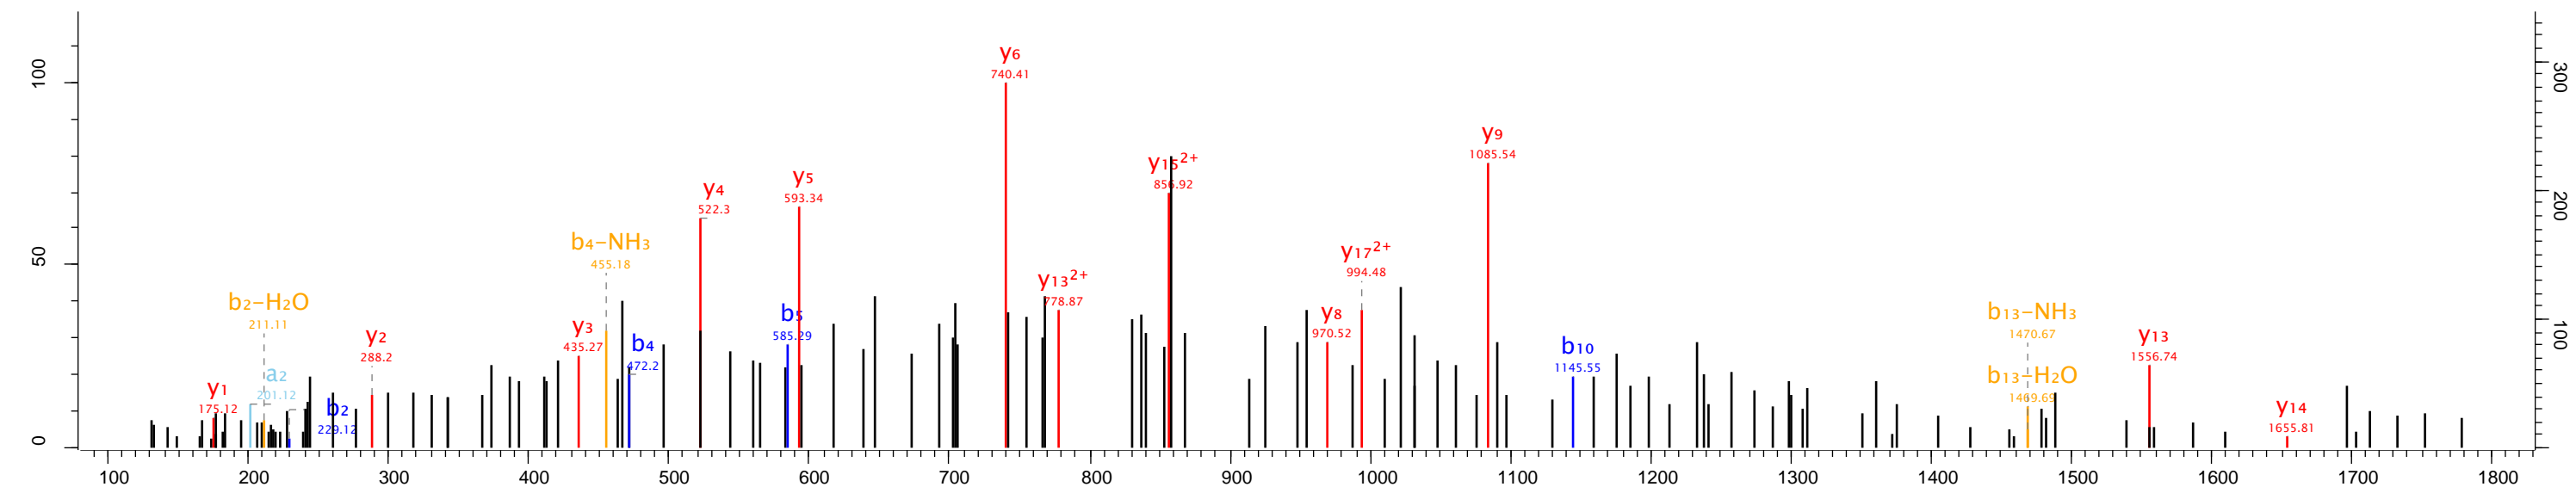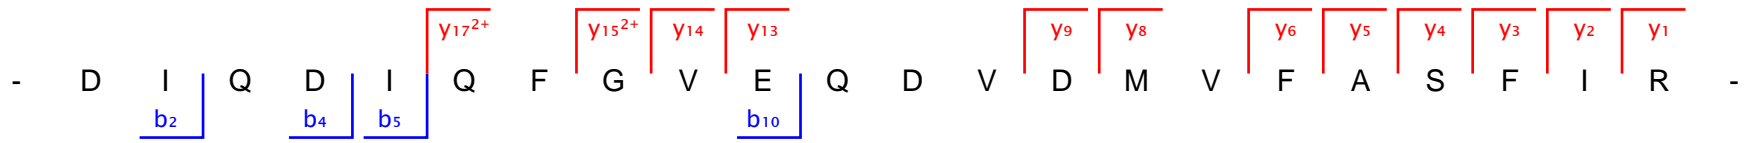

Spectral Annotation for Single-Peptide IDs in 16-cell Embryo using Q-OT-LIT

Raw file: 2015-01-05\_CL03\_XenEmb\_x2  
 Scan: 42637  
 Method: ITMS; HCD  
 Score: 36.27  
 m/z: 854.75

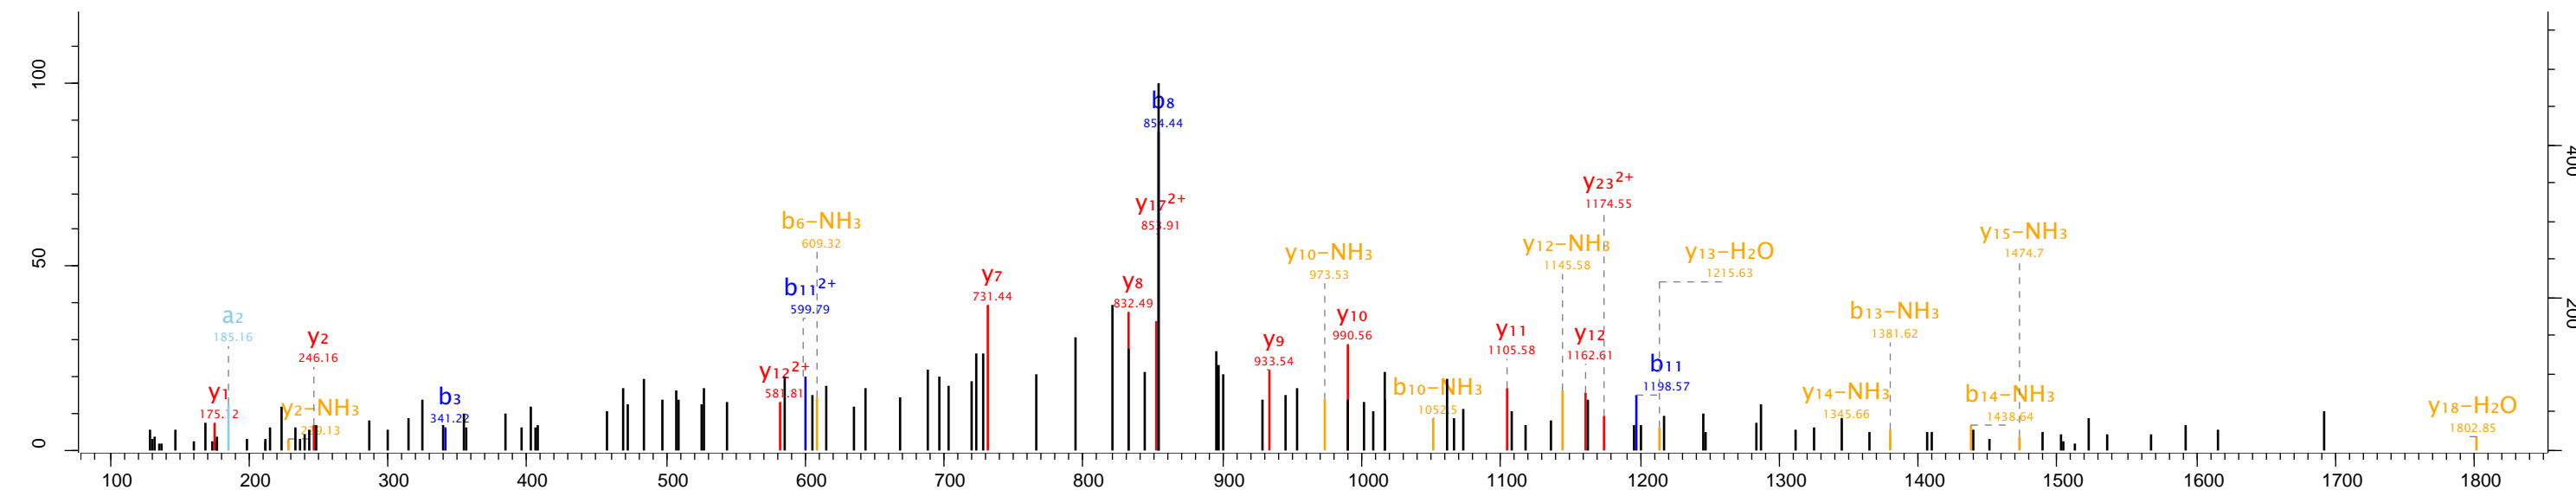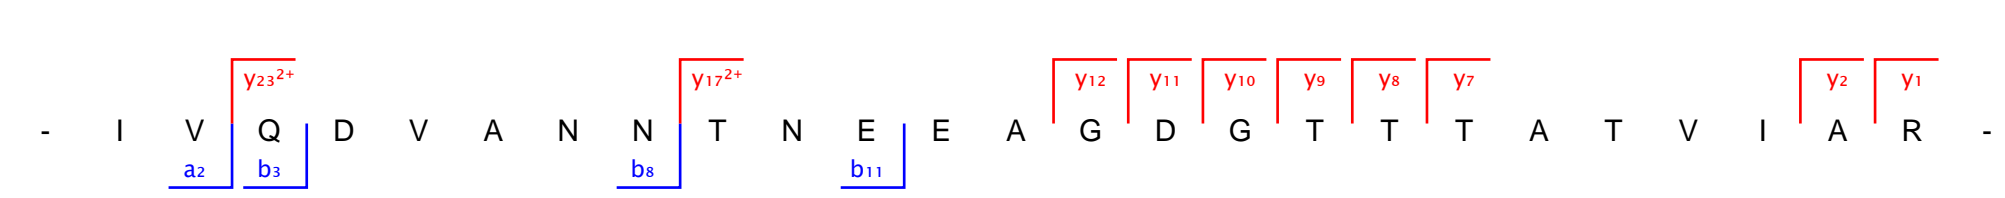

Raw file: 2015-01-05\_CL03\_XenEmb\_x2  
 Scan: 42650 Method: ITMS; HCD Score: 87.47 m/z: 854.08

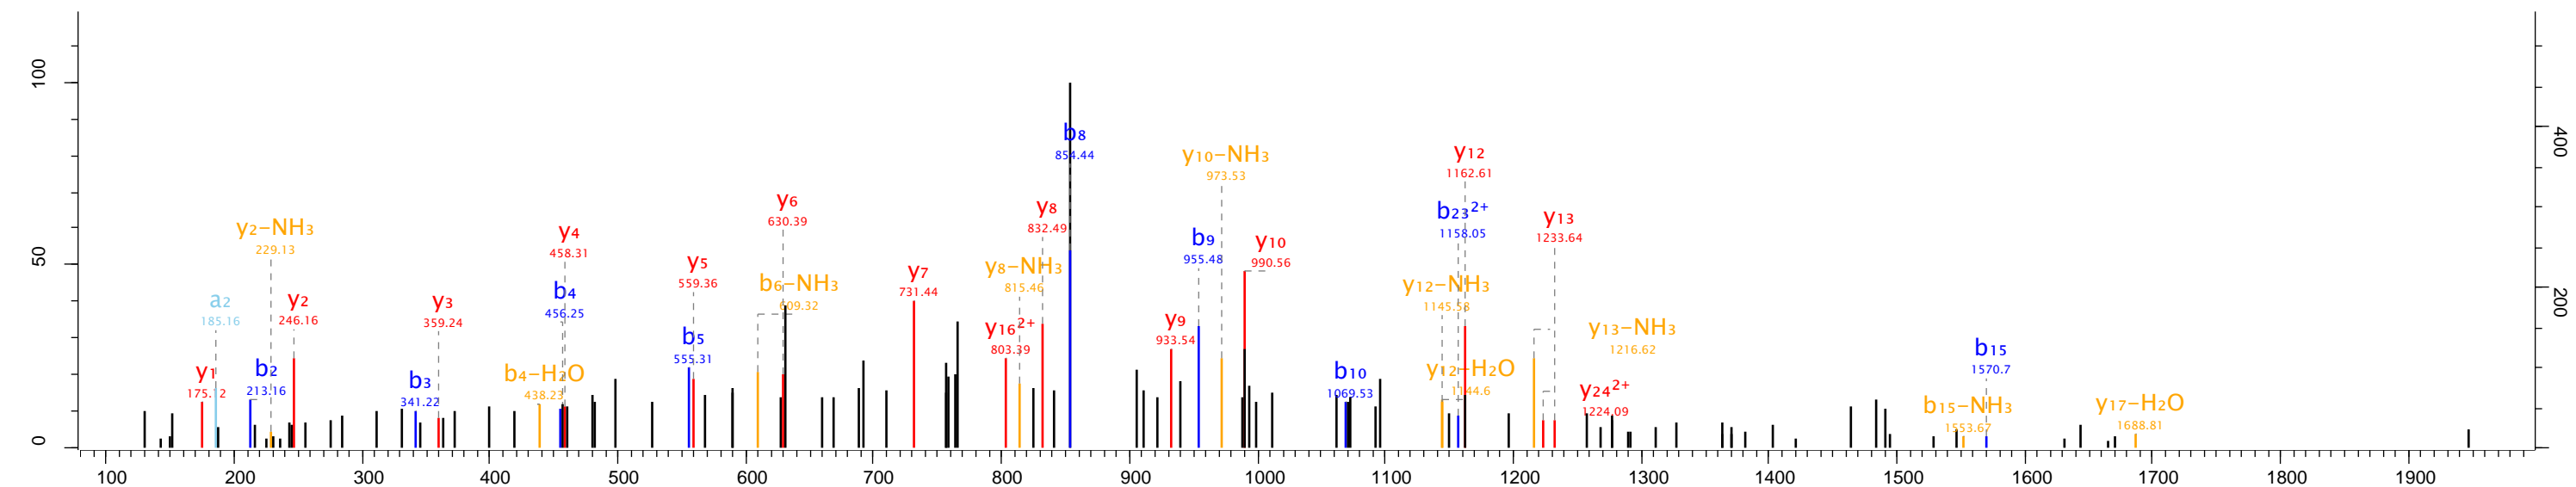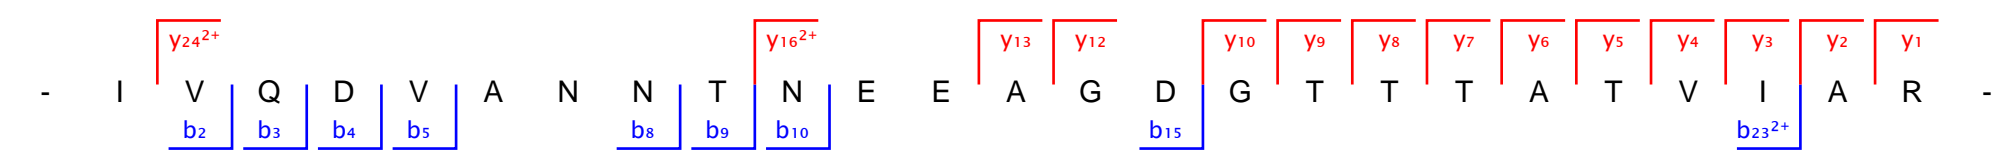

Raw file: 2015-01-05\_CL03\_XenEmb\_x2  
 Scan: 42662 Method: ITMS; HCD Score: 72.65 m/z: 854.08

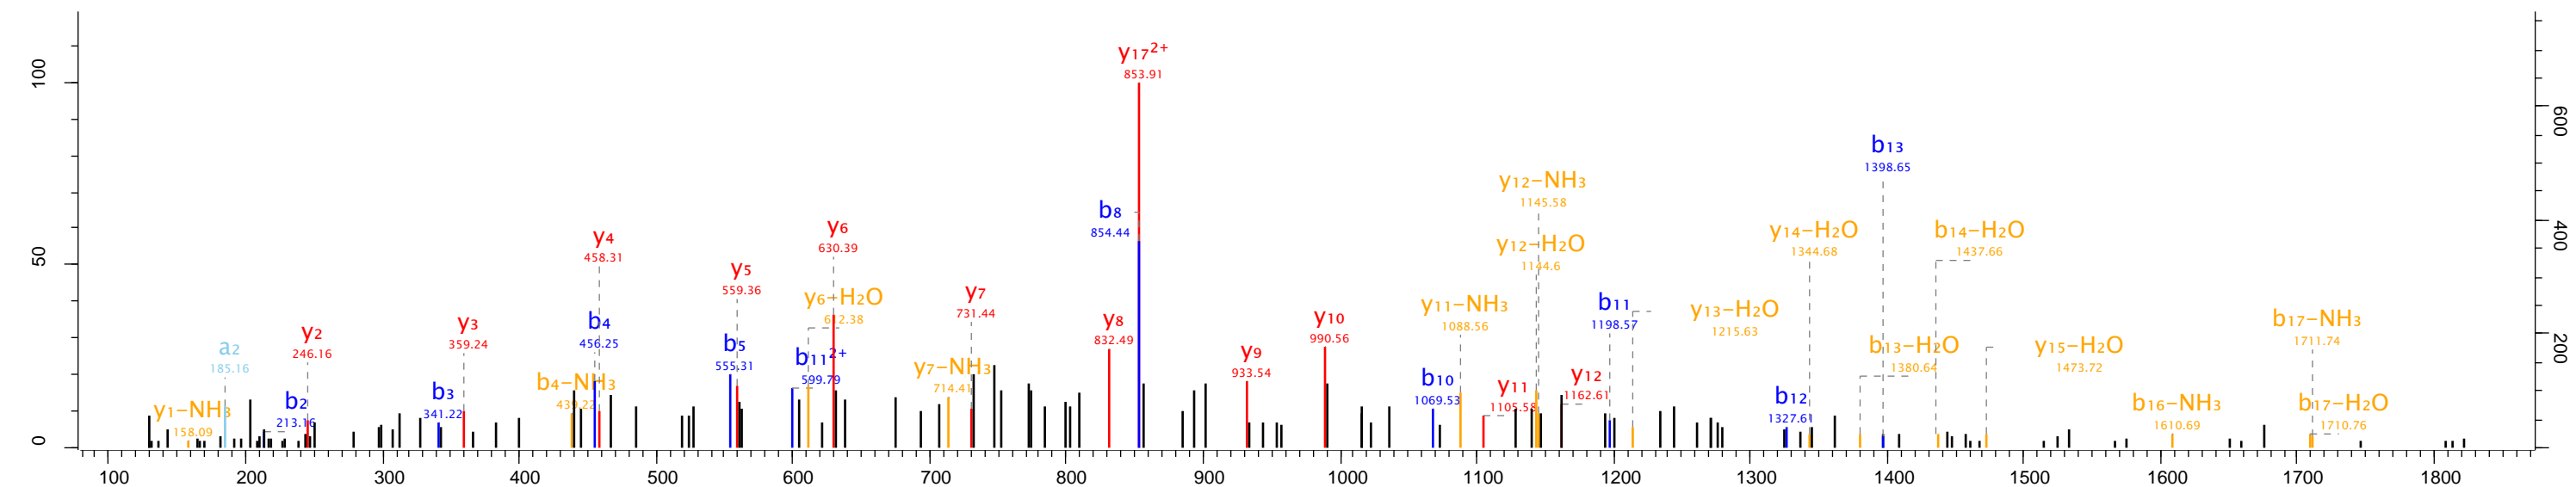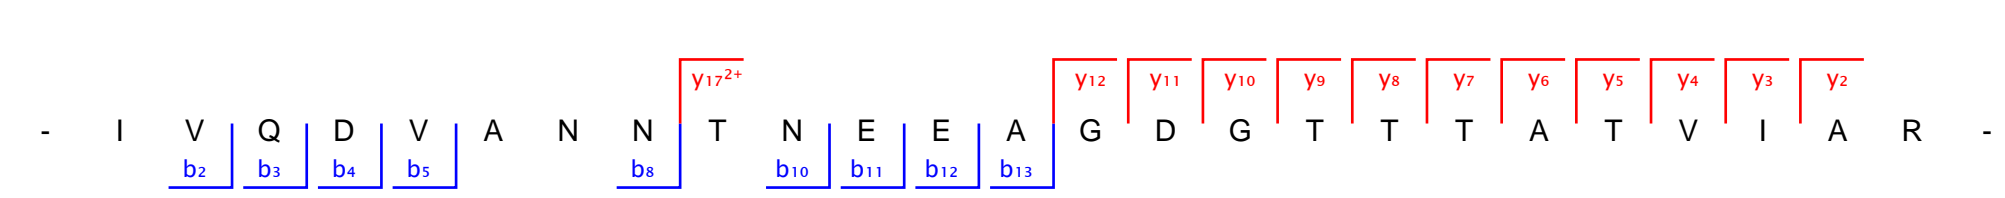

Raw file: 2015-01-05\_CL03\_XenEmb\_x2  
 Scan: 42671 Method: ITMS; HCD Score: 70.45 m/z: 854.09

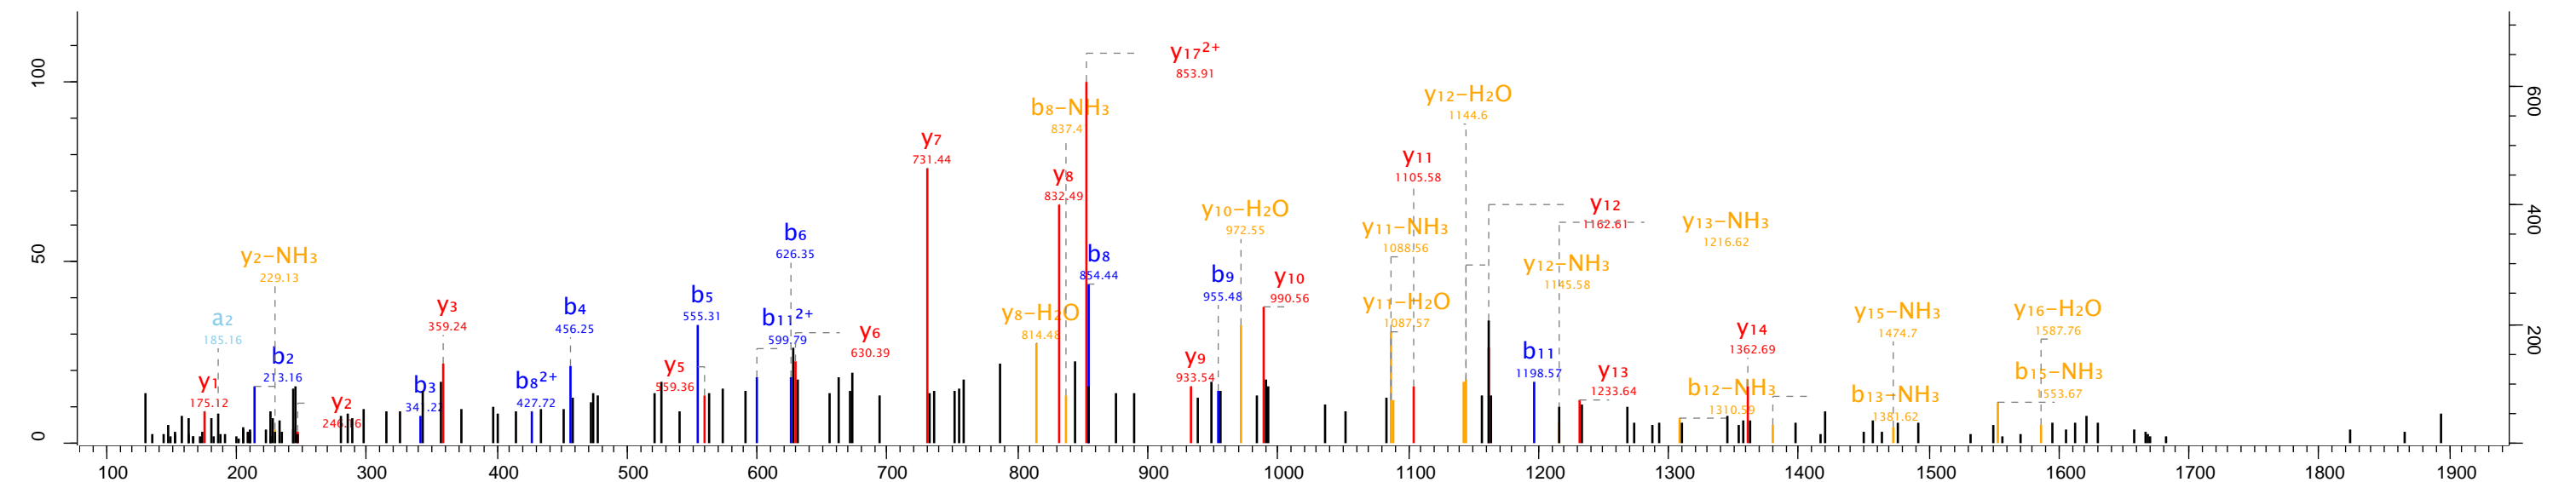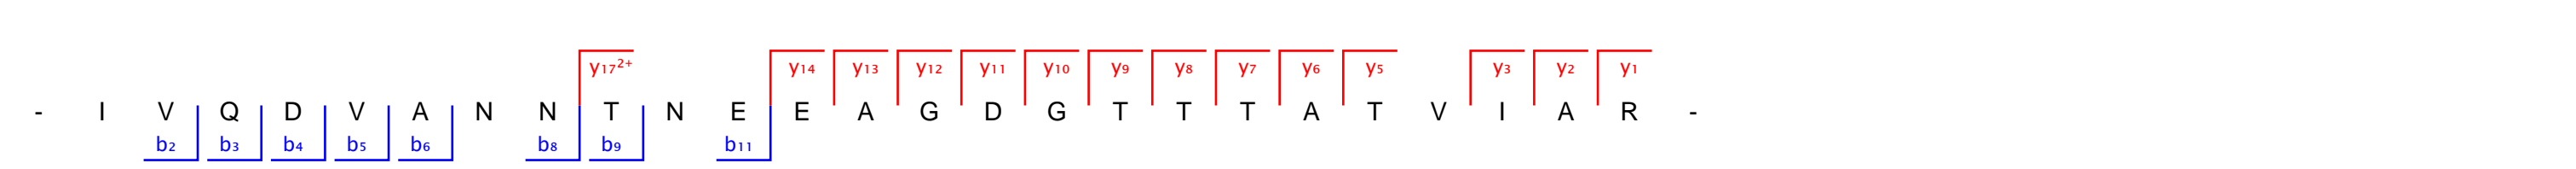

Raw file: 2015-01-05\_CL03\_XenEmb\_x2  
 Scan: 42676  
 Method: ITMS; HCD  
 Score: 72.4  
 m/z: 854.42

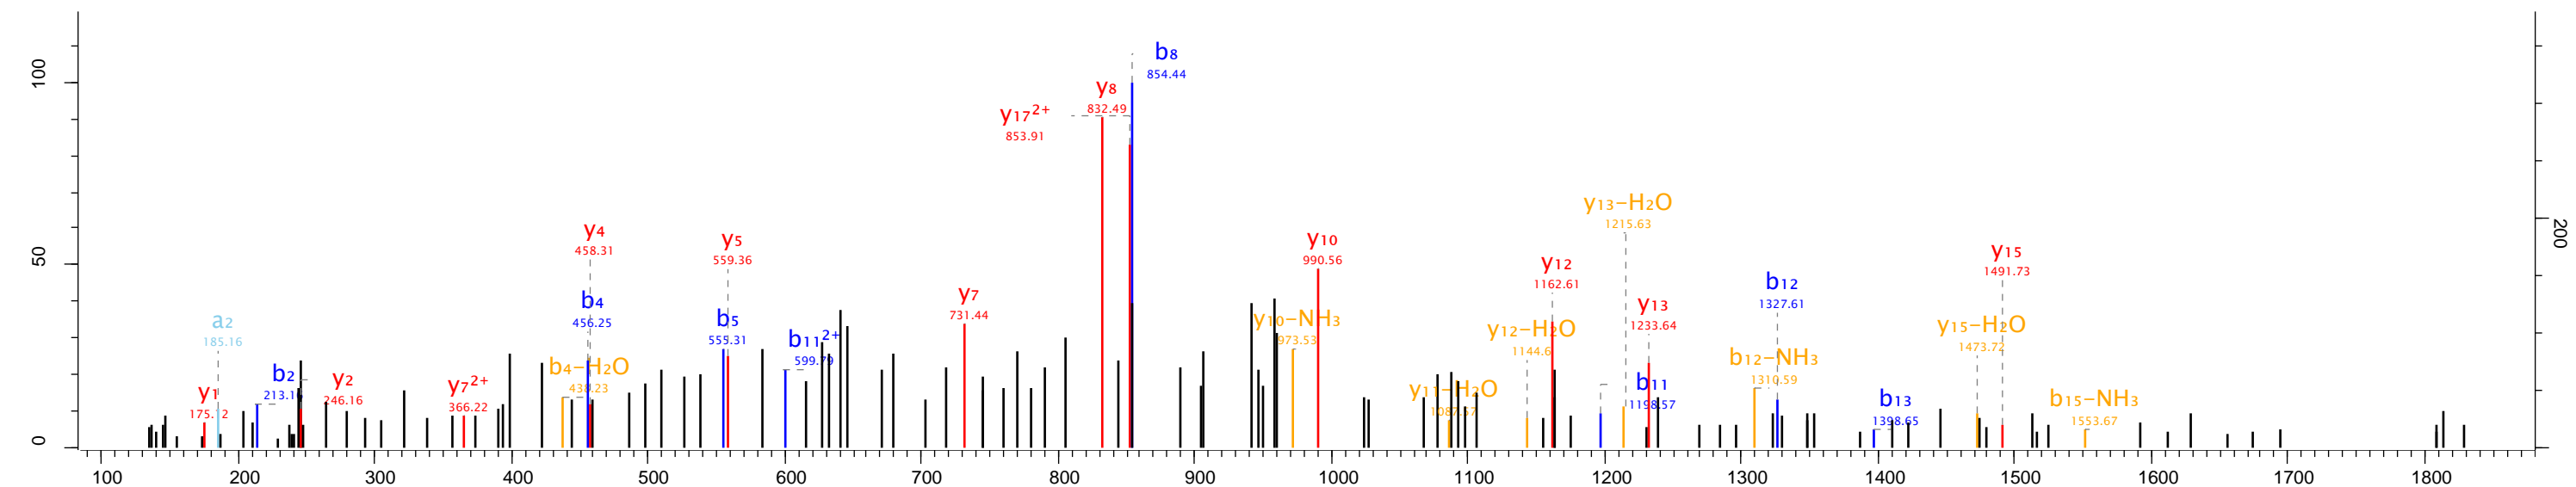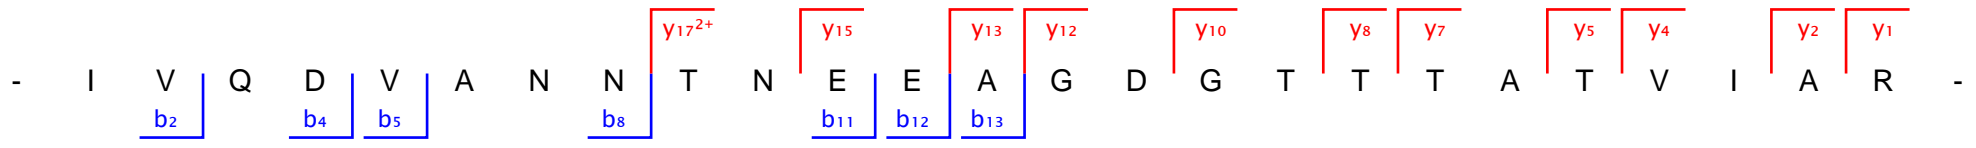

Raw file: 2015-01-05\_CL03\_XenEmb\_x2  
 Scan: 42682  
 Method: ITMS; HCD  
 Score: 85.38  
 m/z: 854.09

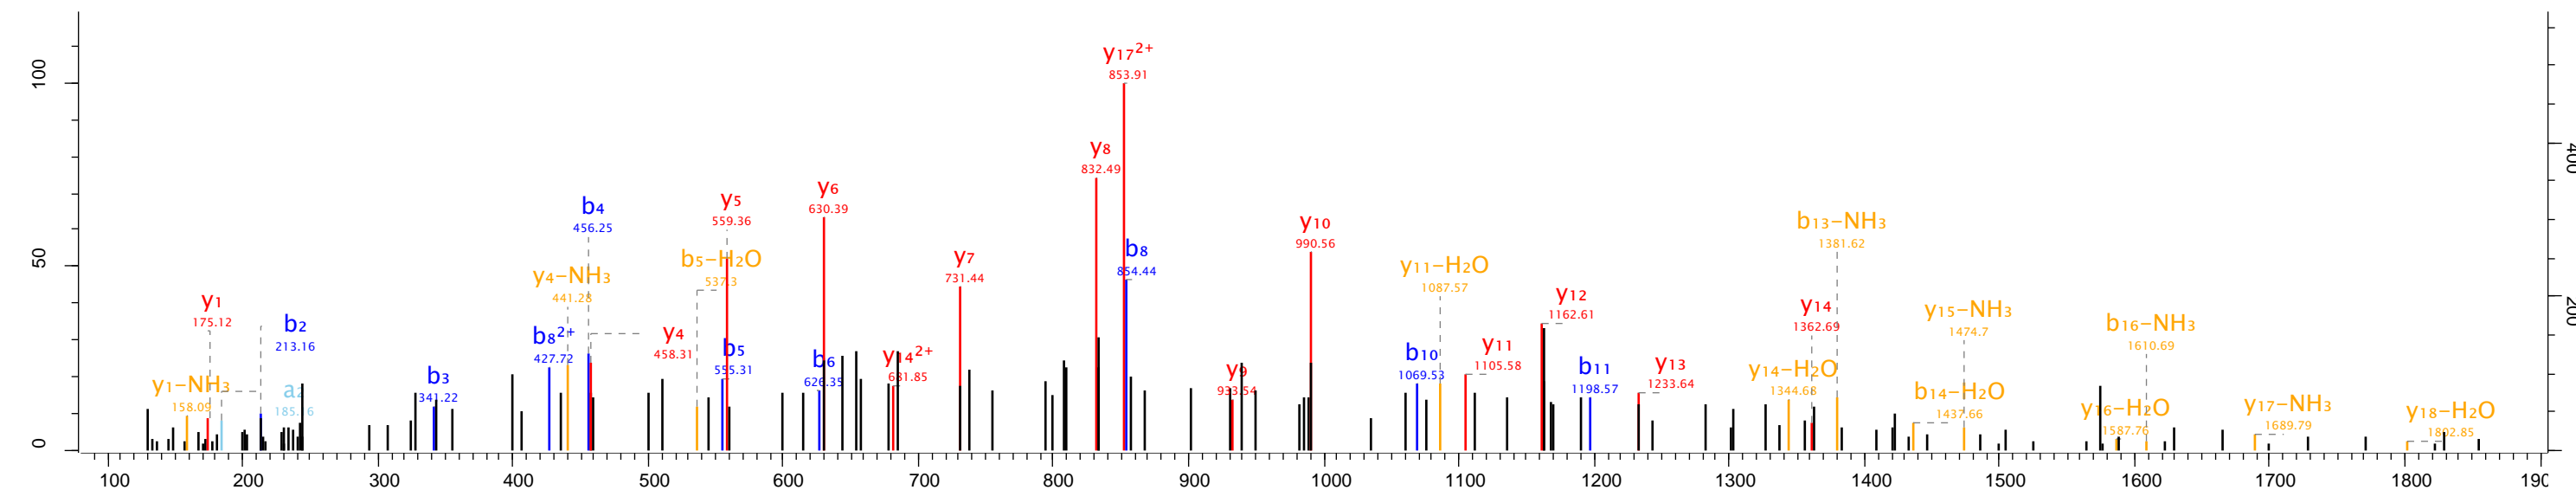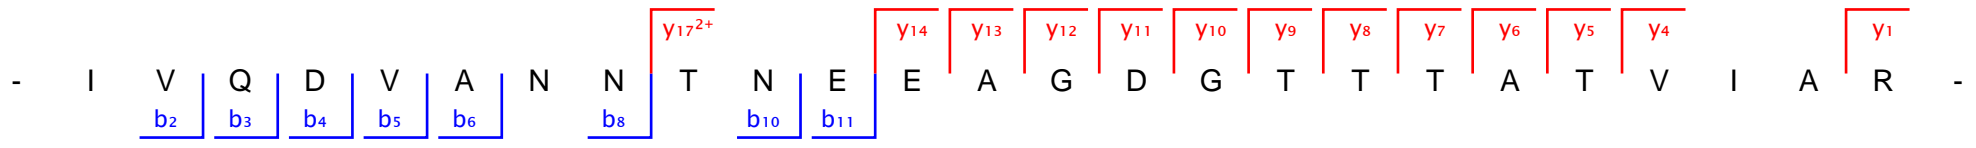



Raw file 2015-01-05\_CL03\_XenEmb\_x2 Scan 42919 Method ITMS; HCD Score 125.08 m/z 854.42

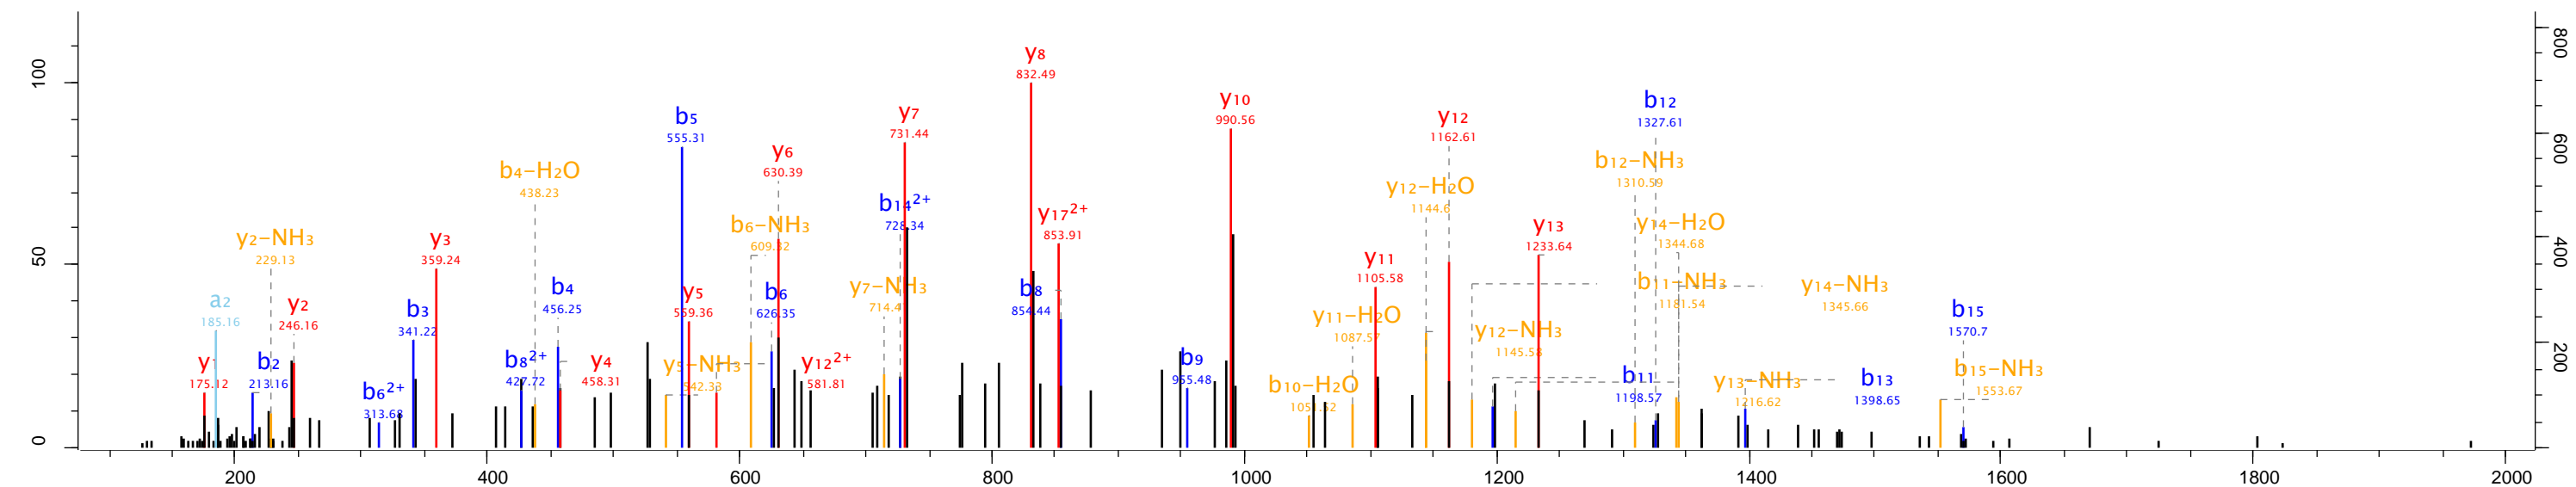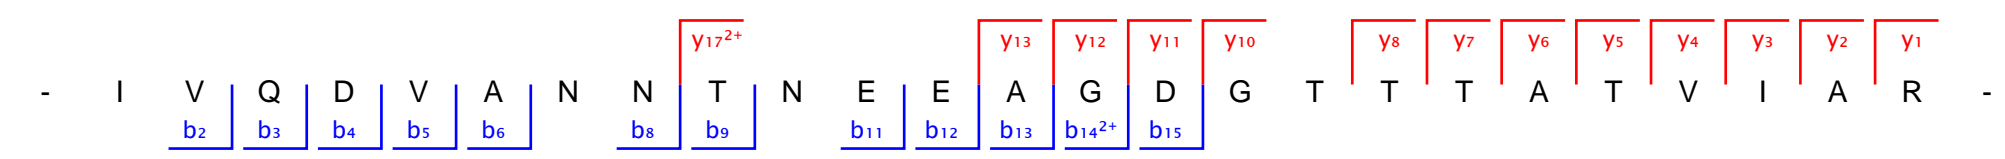

Raw file 2015-01-05\_CL03\_XenEmb\_x2 Scan 43822 Method ITMS; HCD Score 43.16 m/z 1002.46

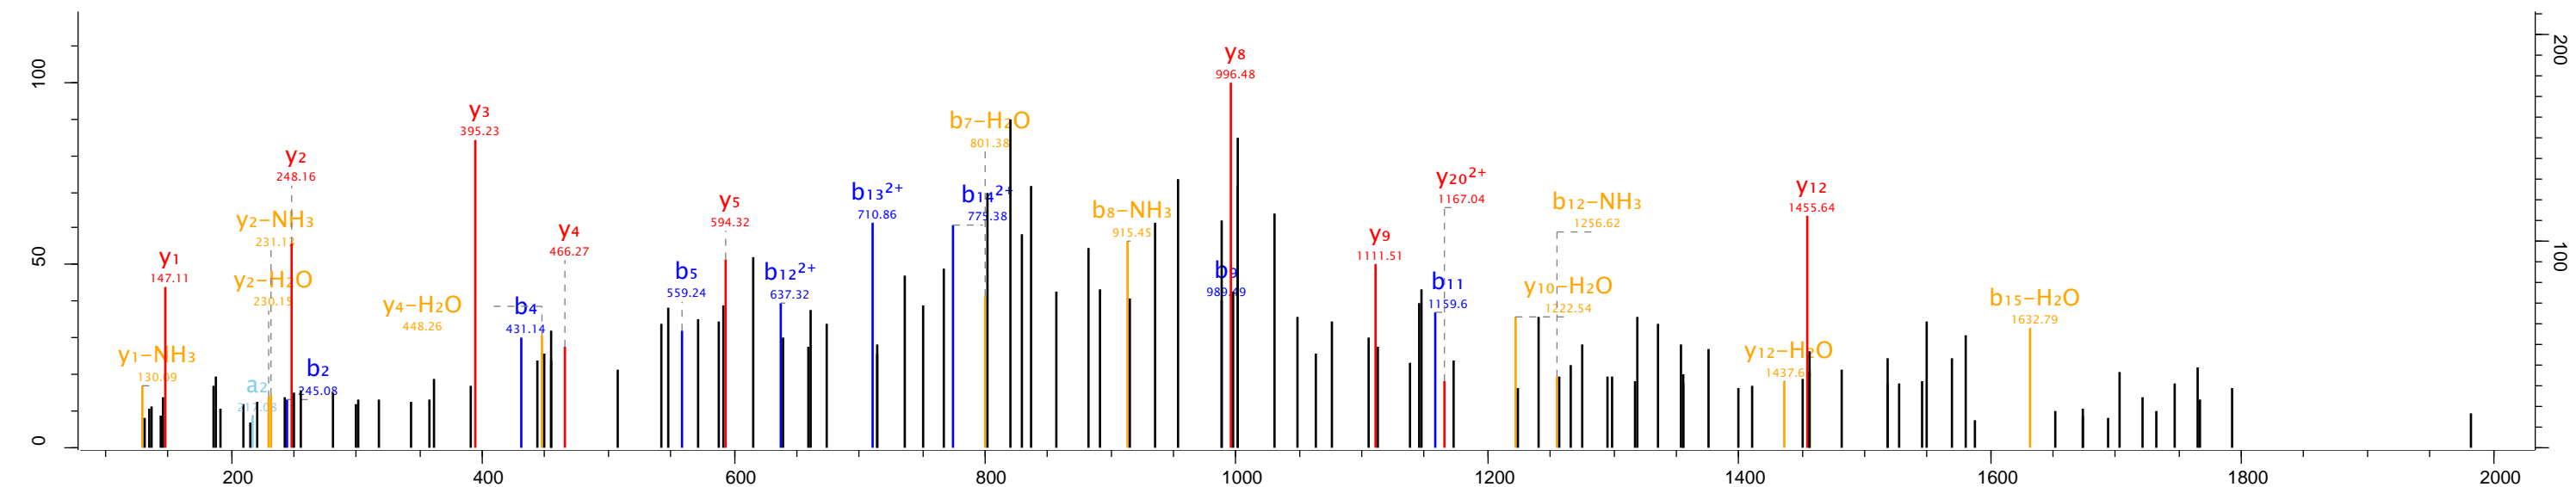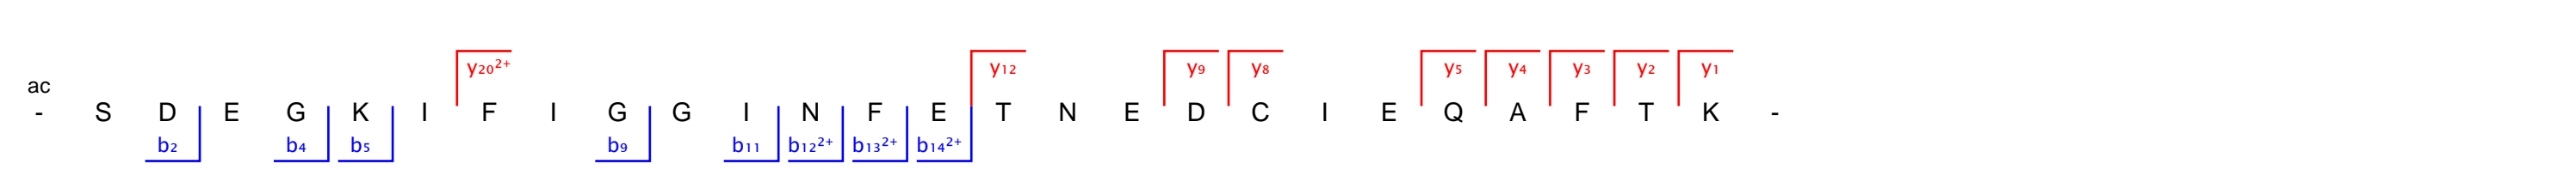

Raw file: 2015-01-05\_CL03\_XenEmb\_x2  
 Scan: 45502 Method: ITMS; HCD Score: 24.32 m/z: 1128.81

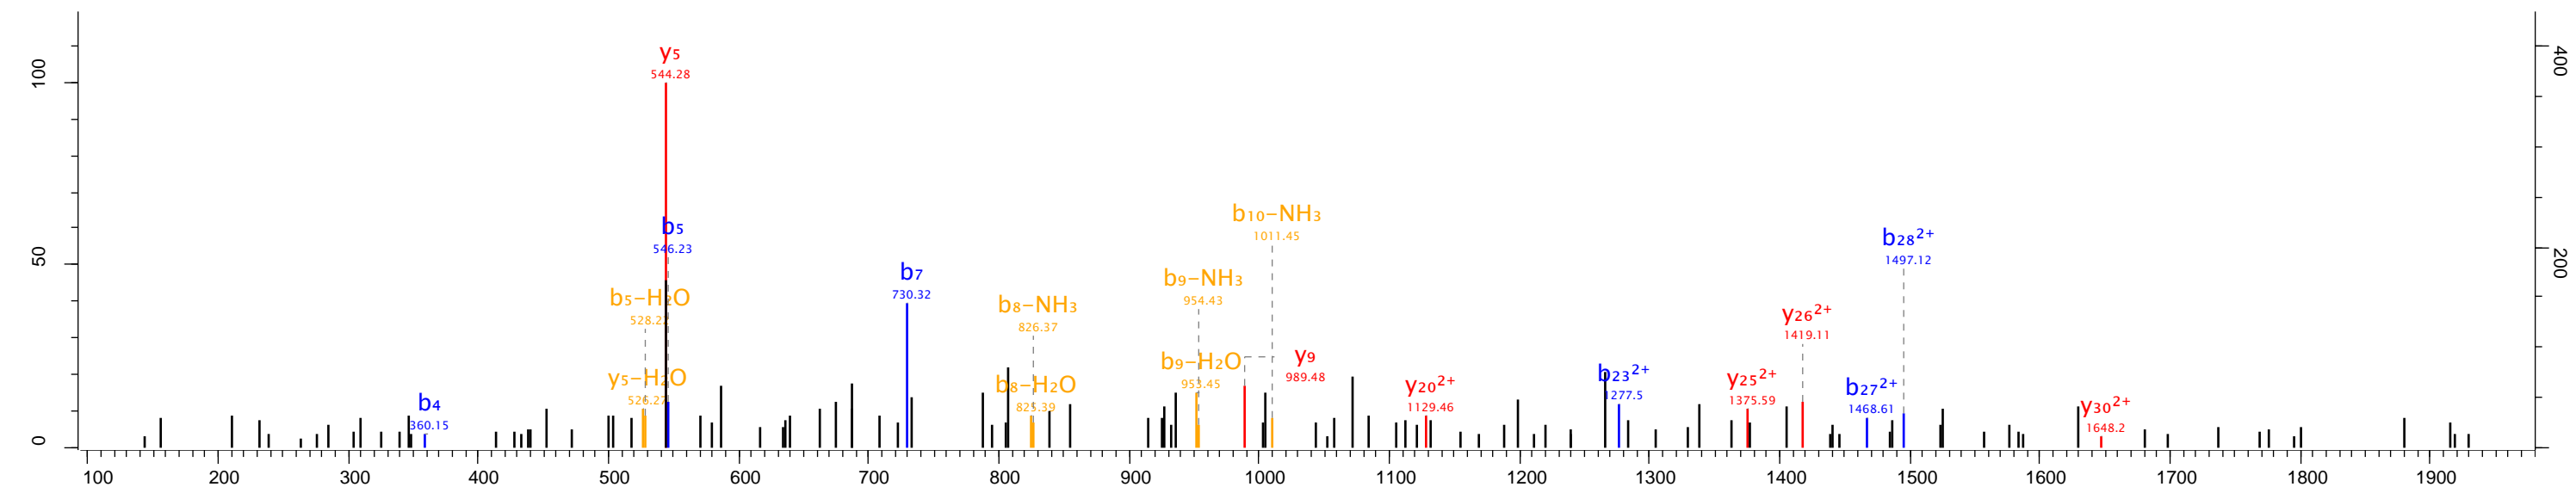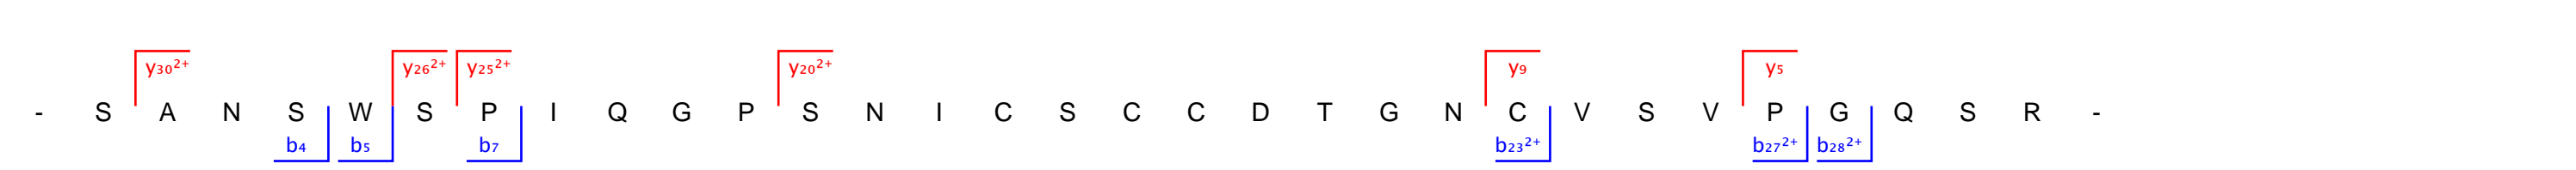

Raw file: 2015-01-05\_CL03\_XenEmb\_x2  
 Scan: 45543 Method: ITMS; HCD Score: 27.47 m/z: 1128.48

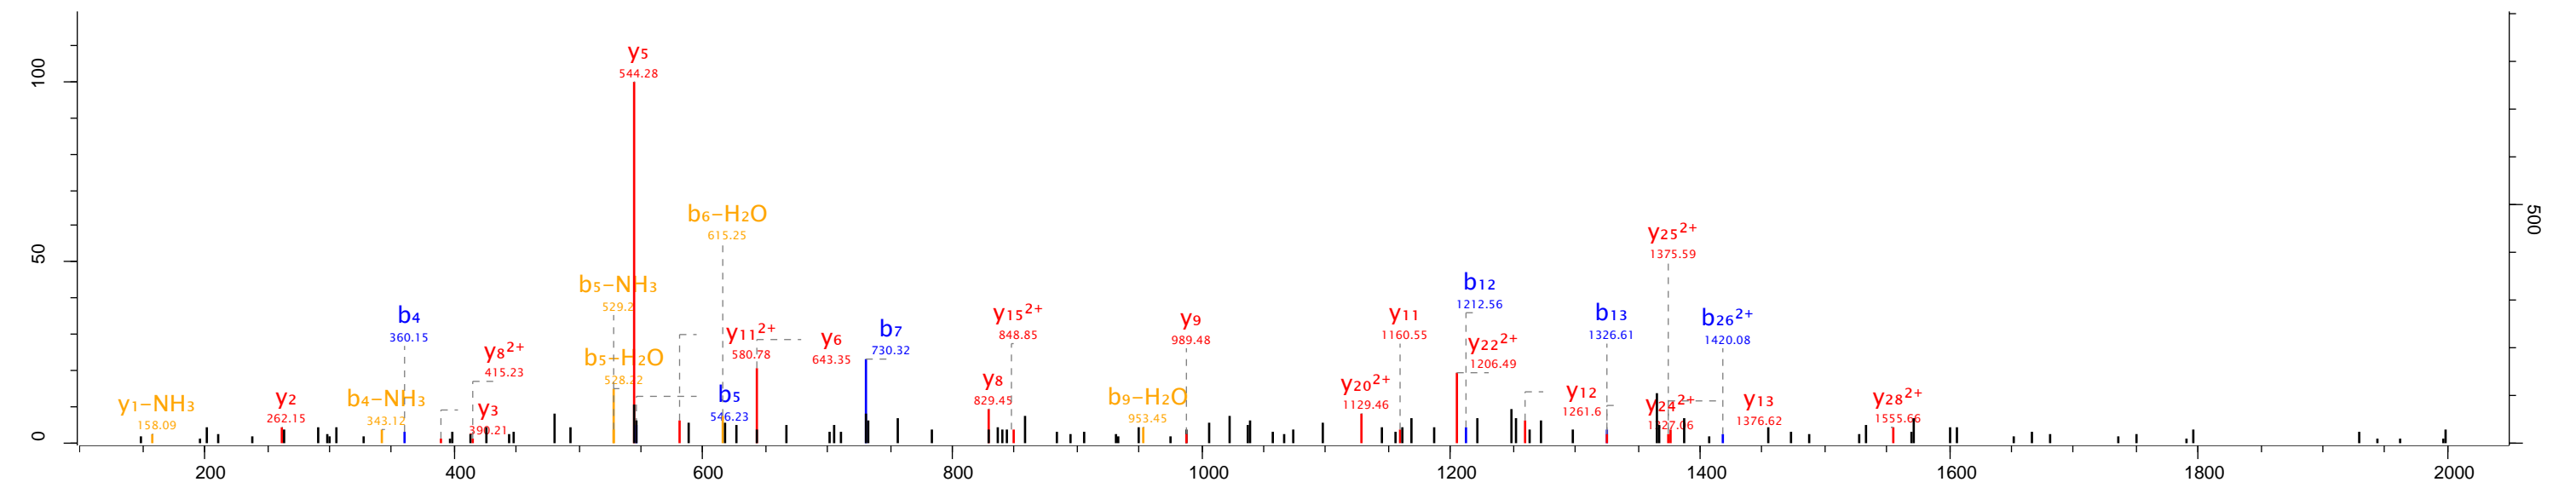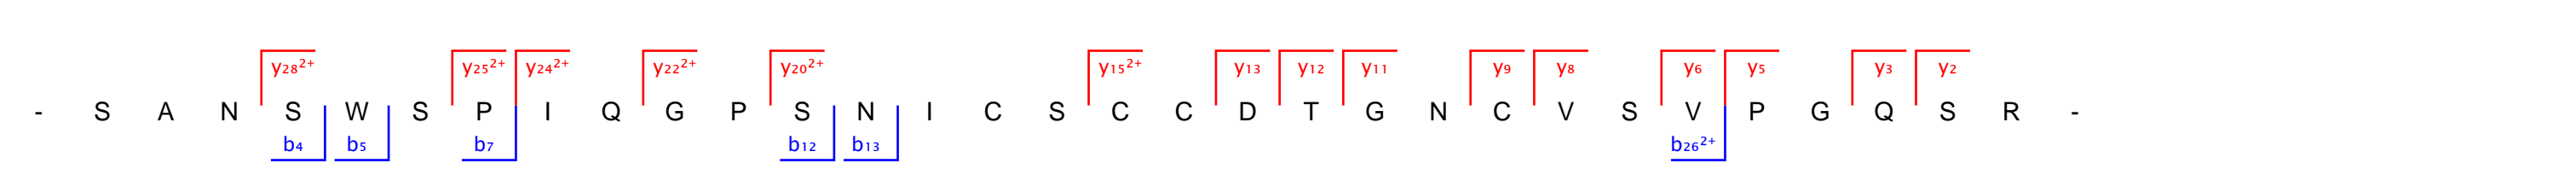

Raw file: 2015-01-05\_CL03\_XenEmb\_x2  
 Scan: 45792 Method: ITMS; HCD Score: 42.03 m/z: 1128.48

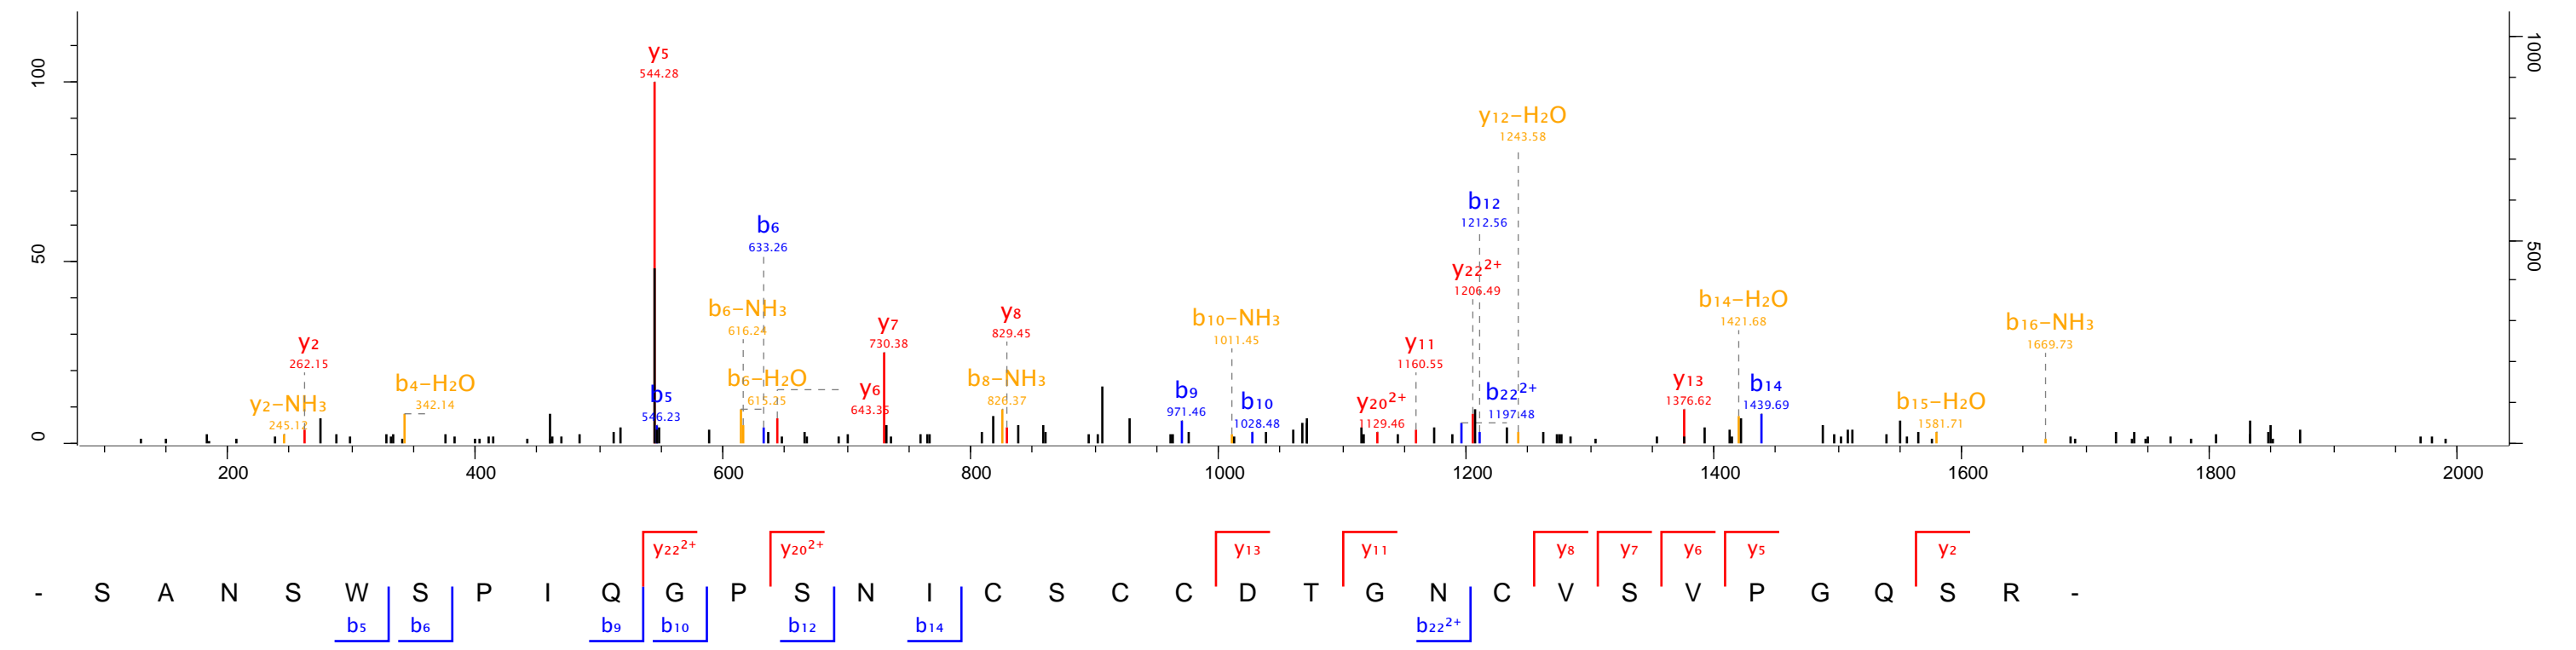

Spectral Annotation for Single-Peptide IDs in 16-cell Embryo using Q-OT-LIT

Raw file Scan Method Score m/z  
 2015-01-05\_CL03\_XenEmb\_x2 45891 ITMS; HCD 24.4 1128.81

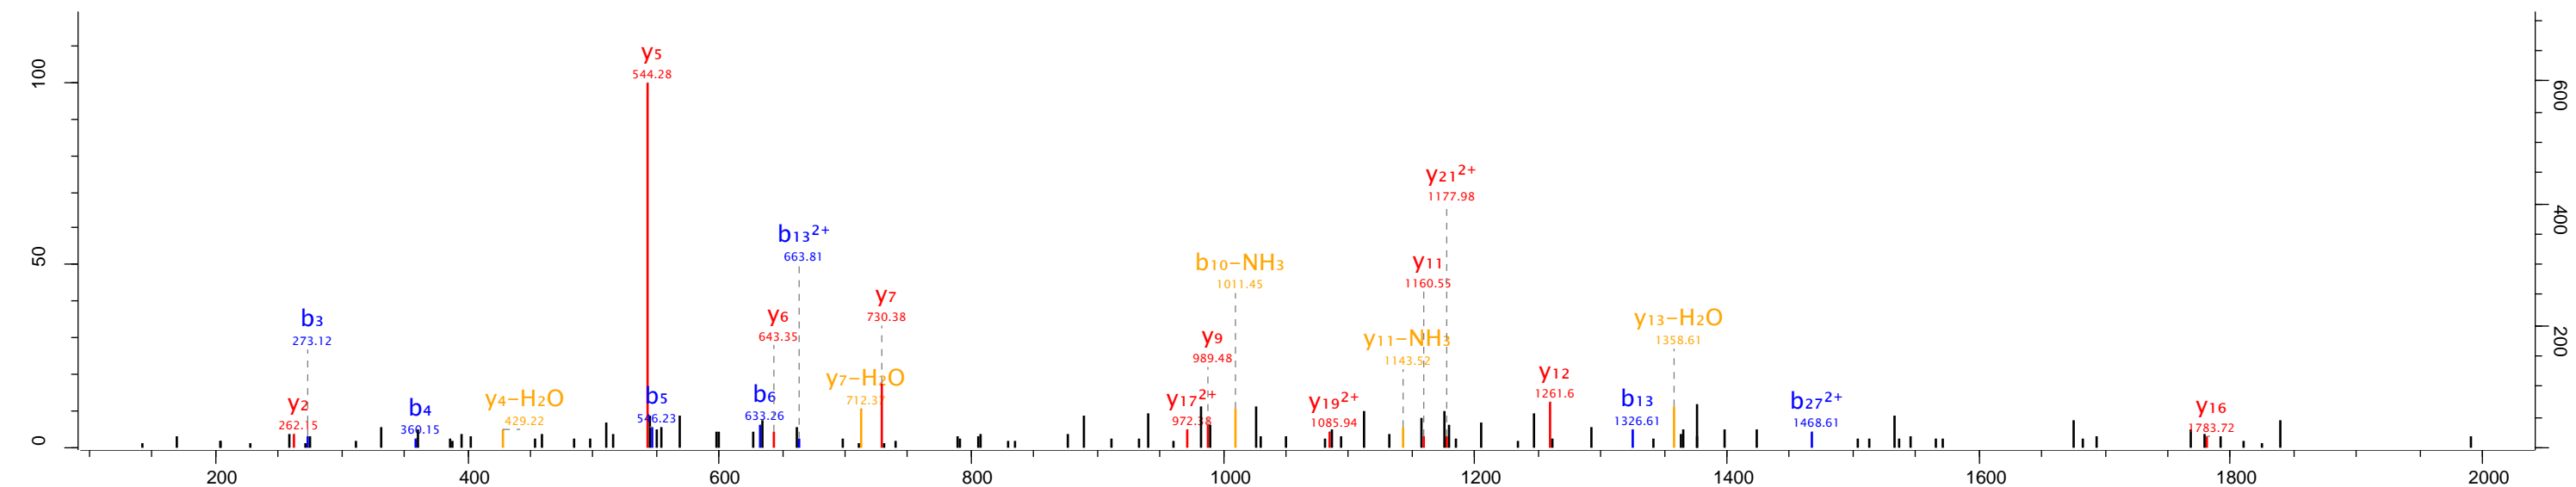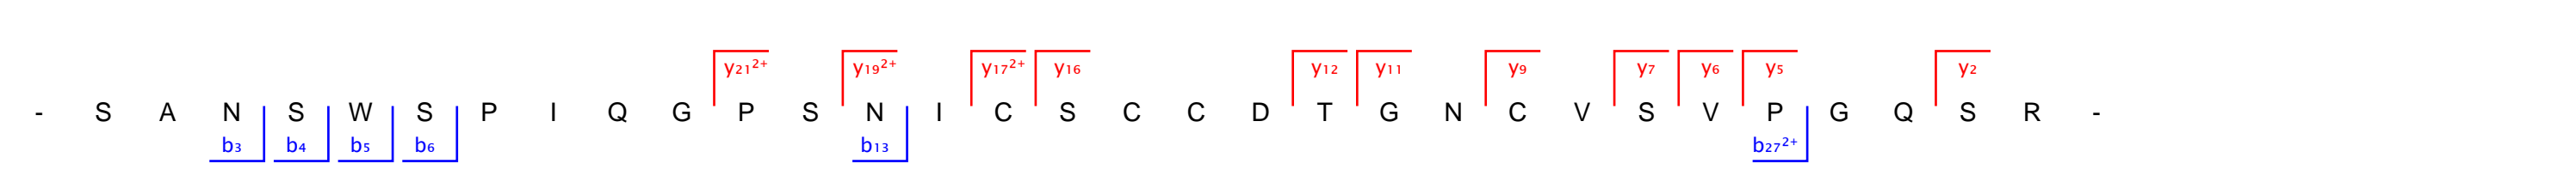

Raw file: 2015-01-05\_CL03\_XenEmb\_x2  
 Scan: 46012 Method: ITMS; HCD Score: 50.03 m/z: 556.76

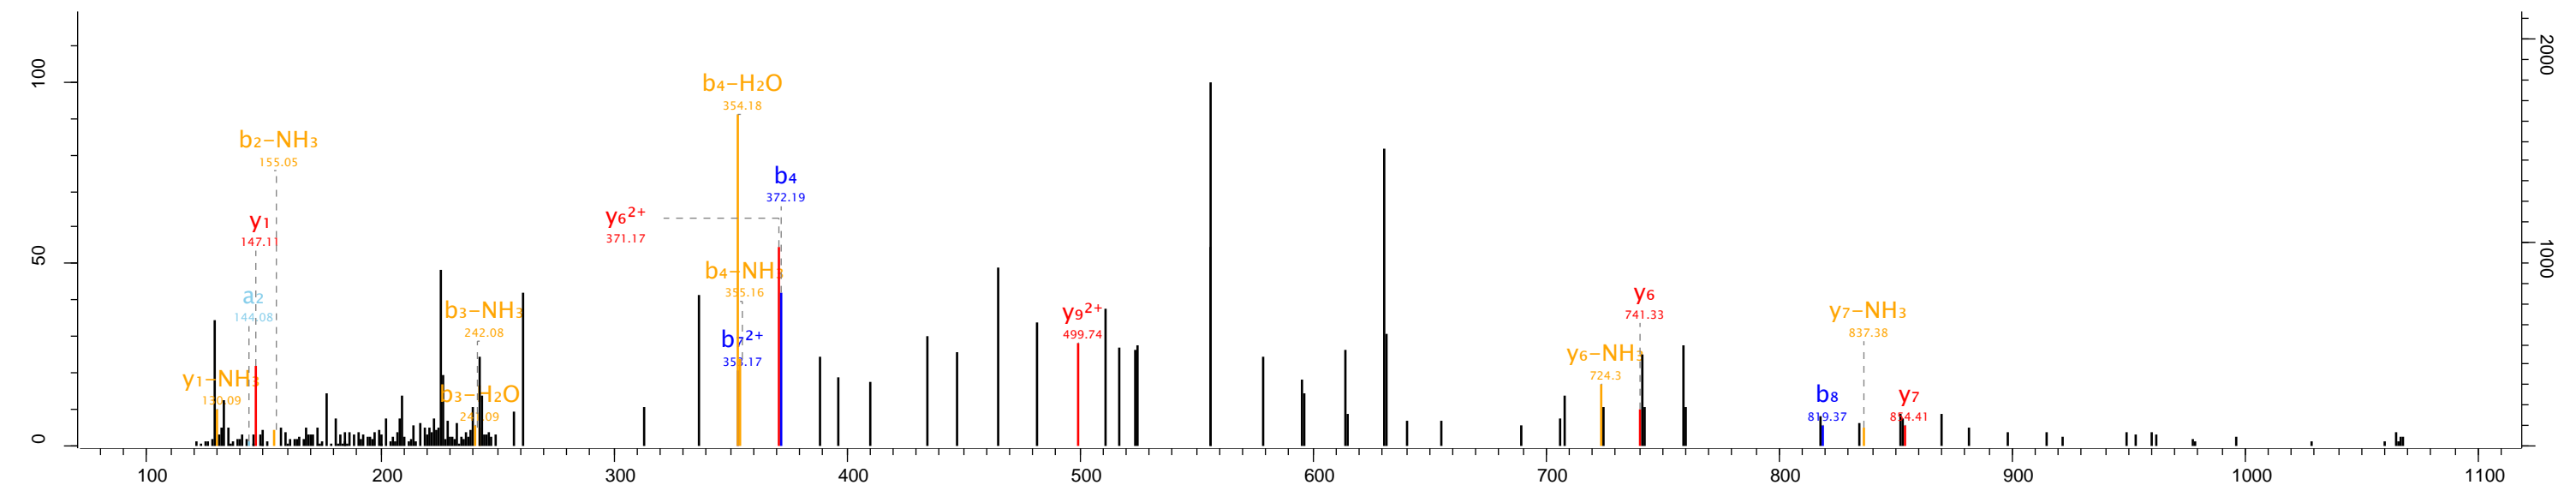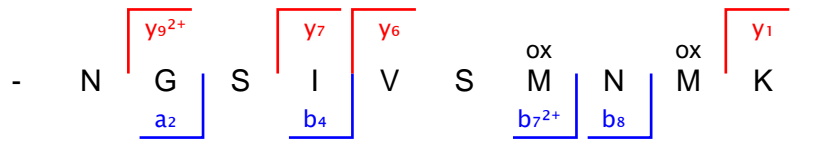

Spectral Annotation for Single-Peptide IDs in 16-cell Embryo using Q-OT-LIT

Raw file: 2015-01-05\_CL03\_XenEmb\_x2  
 Scan: 48453 Method: ITMS; HCD Score: 39.22 m/z: 901.97

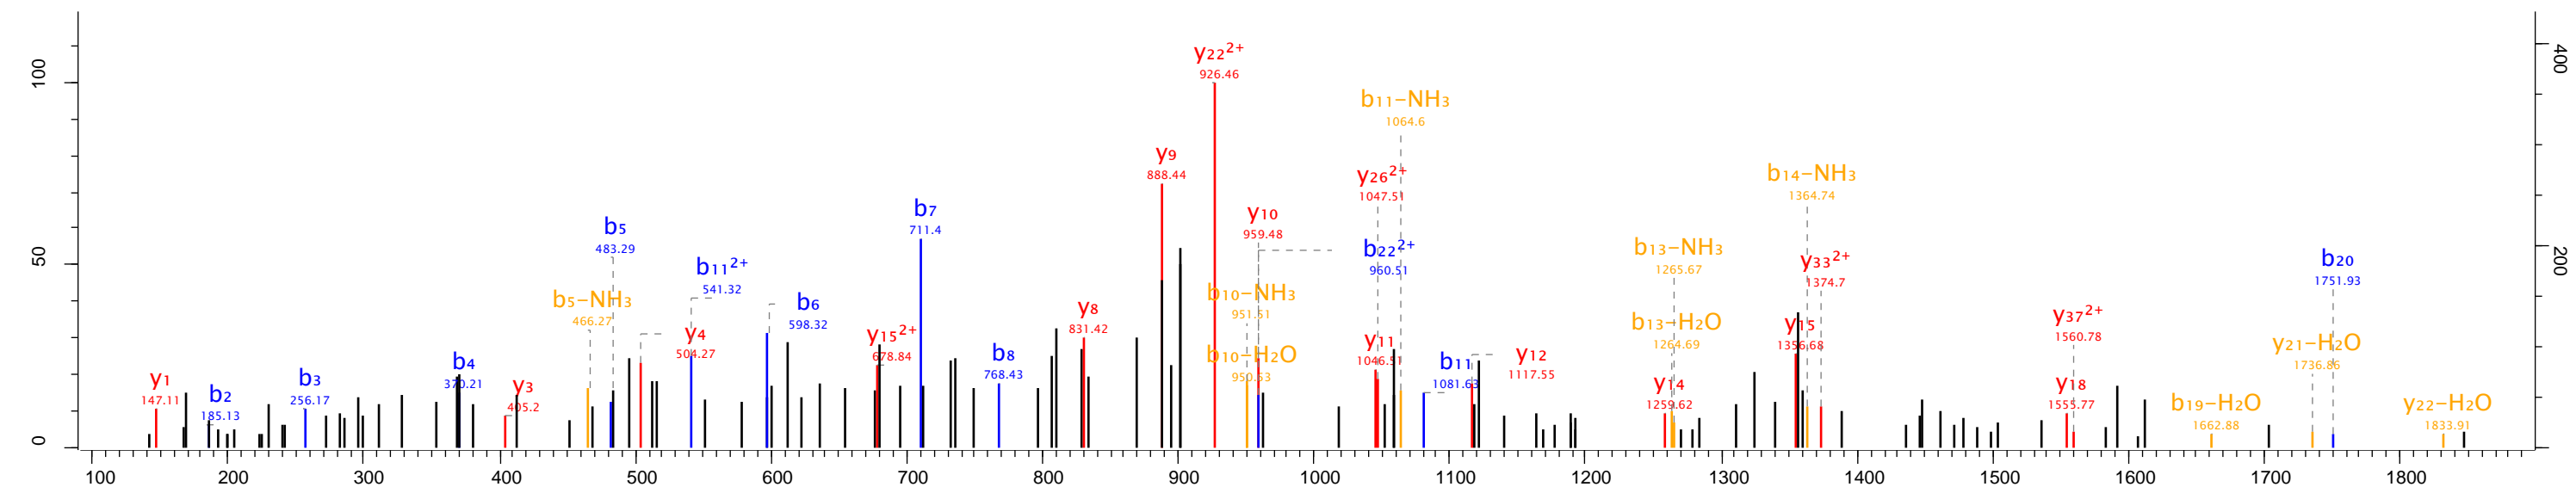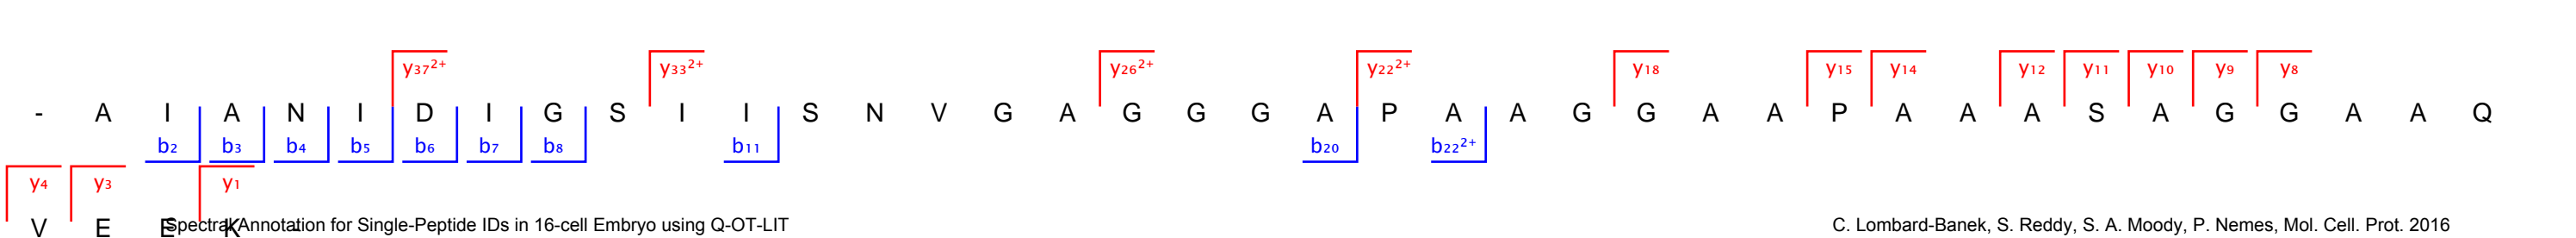

Spectral Annotation for Single-Peptide IDs in 16-cell Embryo using Q-OT-LIT

C. Lombard-Banek, S. Reddy, S. A. Moody, P. Nemes, Mol. Cell. Prot. 2016



Raw file: 2015-01-05\_CL03\_XenEmb\_x2  
 Scan: 48555  
 Method: ITMS; HCD  
 Score: 19.74  
 m/z: 1201.95

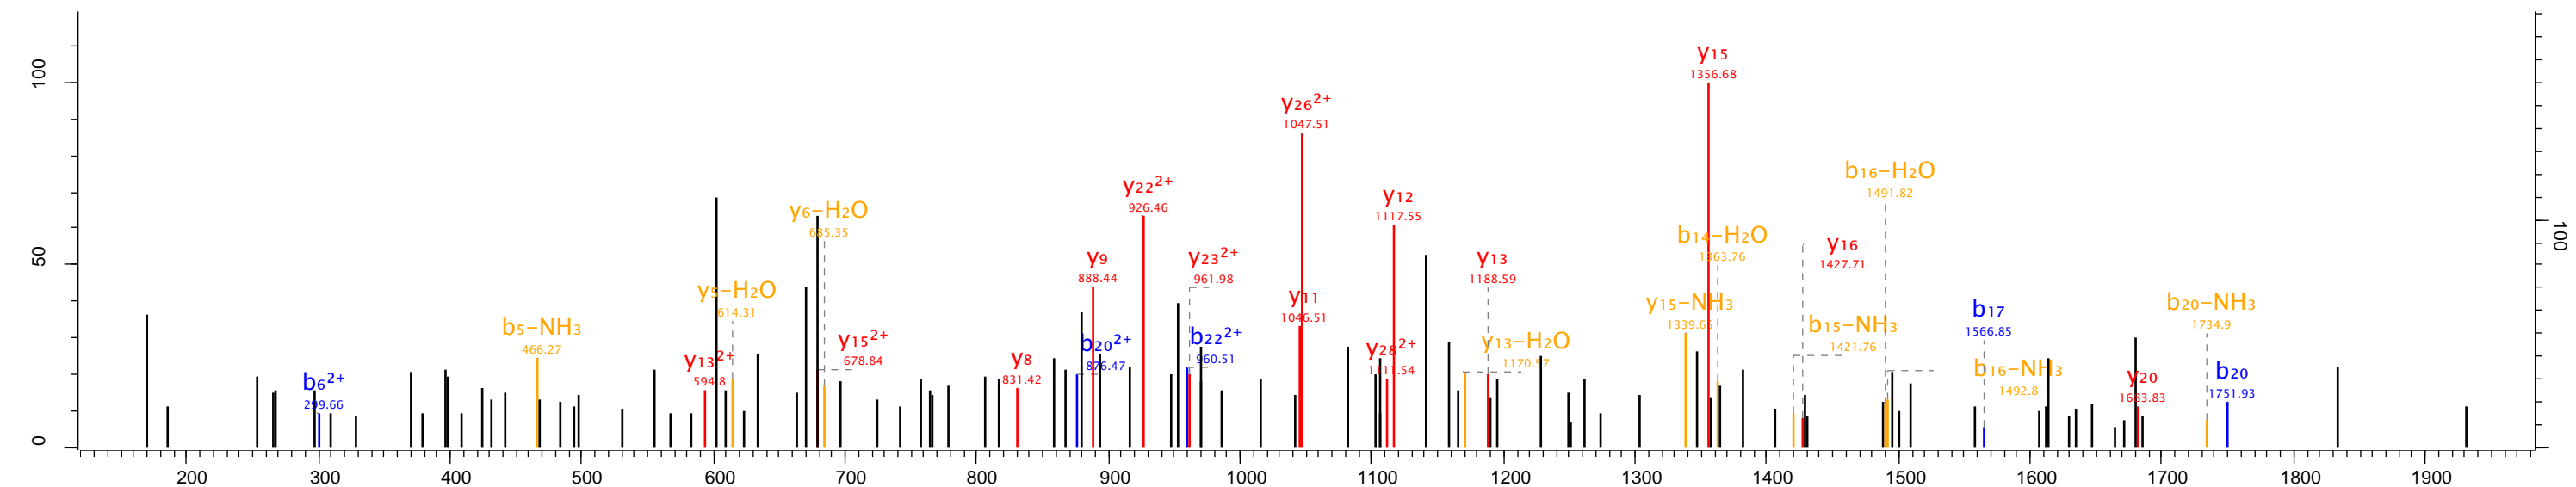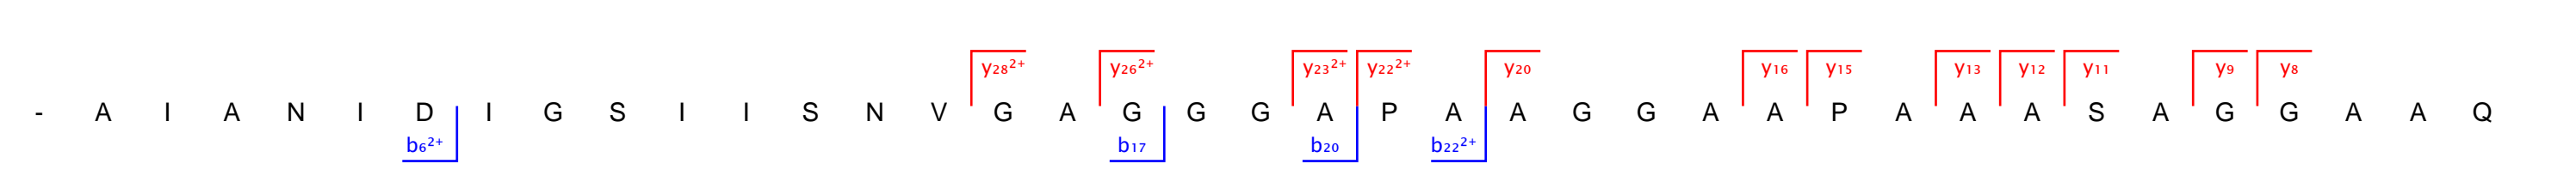

V E SpectraK Annotation for Single-Peptide IDs in 16-cell Embryo using Q-OT-LIT

Raw file Scan Method Score m/z  
 2015-01-05\_CL03\_XenEmb\_x2 48567 ITMS; HCD 52.33 1202.29

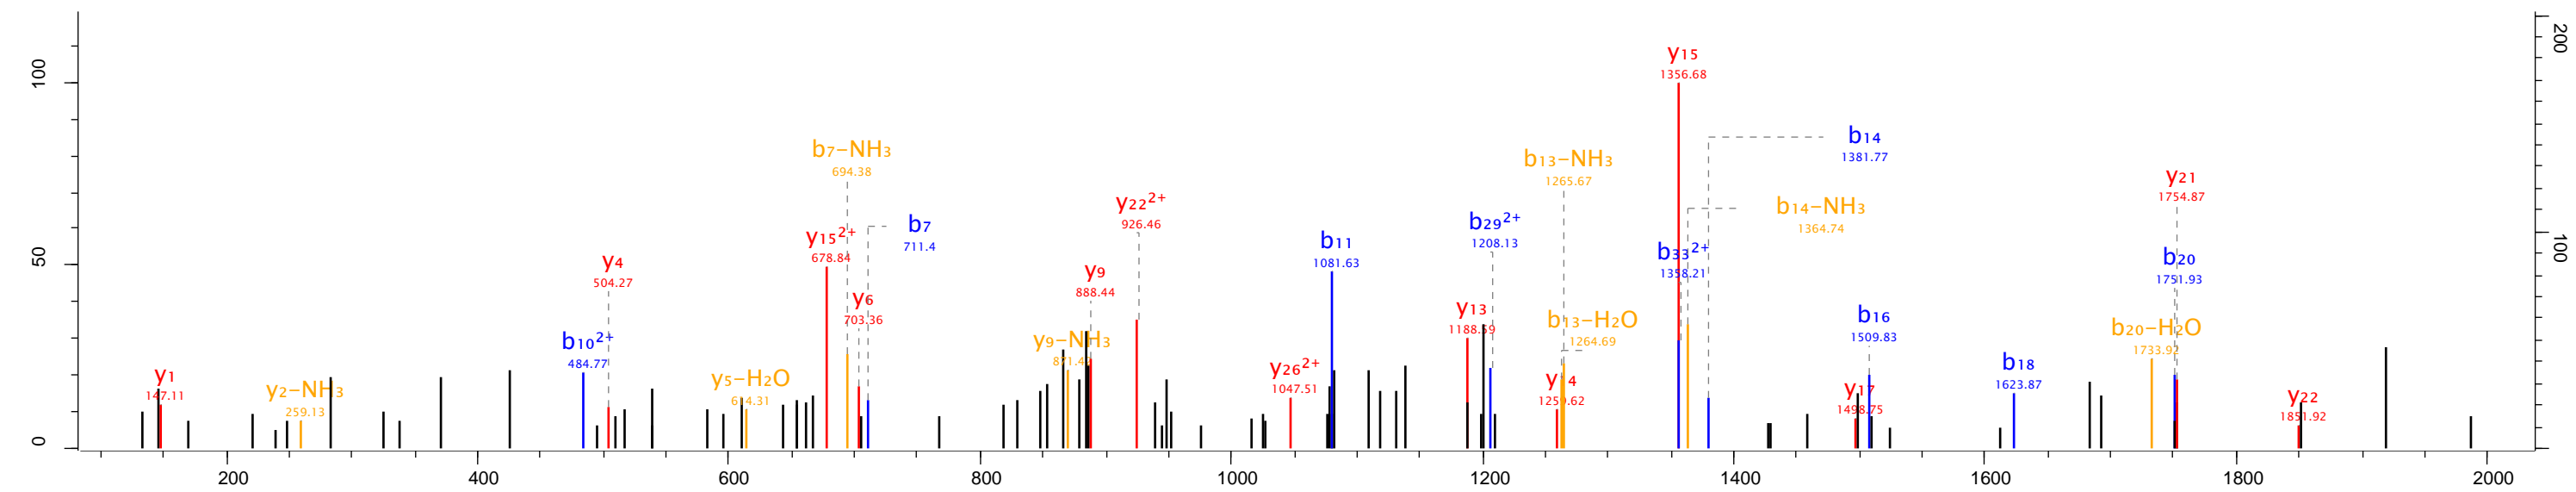

- A I A N I D I G S I I S N V G A G G G A P A A G G A A P A A S A G G A A Q

Fragmentation mapping (b and y ions) is shown below the peptide sequence:

- Blue brackets (b ions):** b7 (I-D), b10<sup>2+</sup> (I), b11 (I), b14 (V), b16 (A), b18 (G), b20 (A), b29<sup>2+</sup> (A), b33<sup>2+</sup> (A).
- Red brackets (y ions):** y4 (S), y1 (I), y26<sup>2+</sup> (G), y22 (P), y21 (A), y17 (A), y15 (P), y14 (A), y13 (A), y9 (A), y6 (A).

V E S Spectral Annotation for Single-Peptide IDs in 16-cell Embryo using Q-OT-LIT

Raw file 2015-01-05\_CL03\_XenEmb\_x2 Scan 48649 Method ITMS; HCD Score 69.73 m/z 901.97

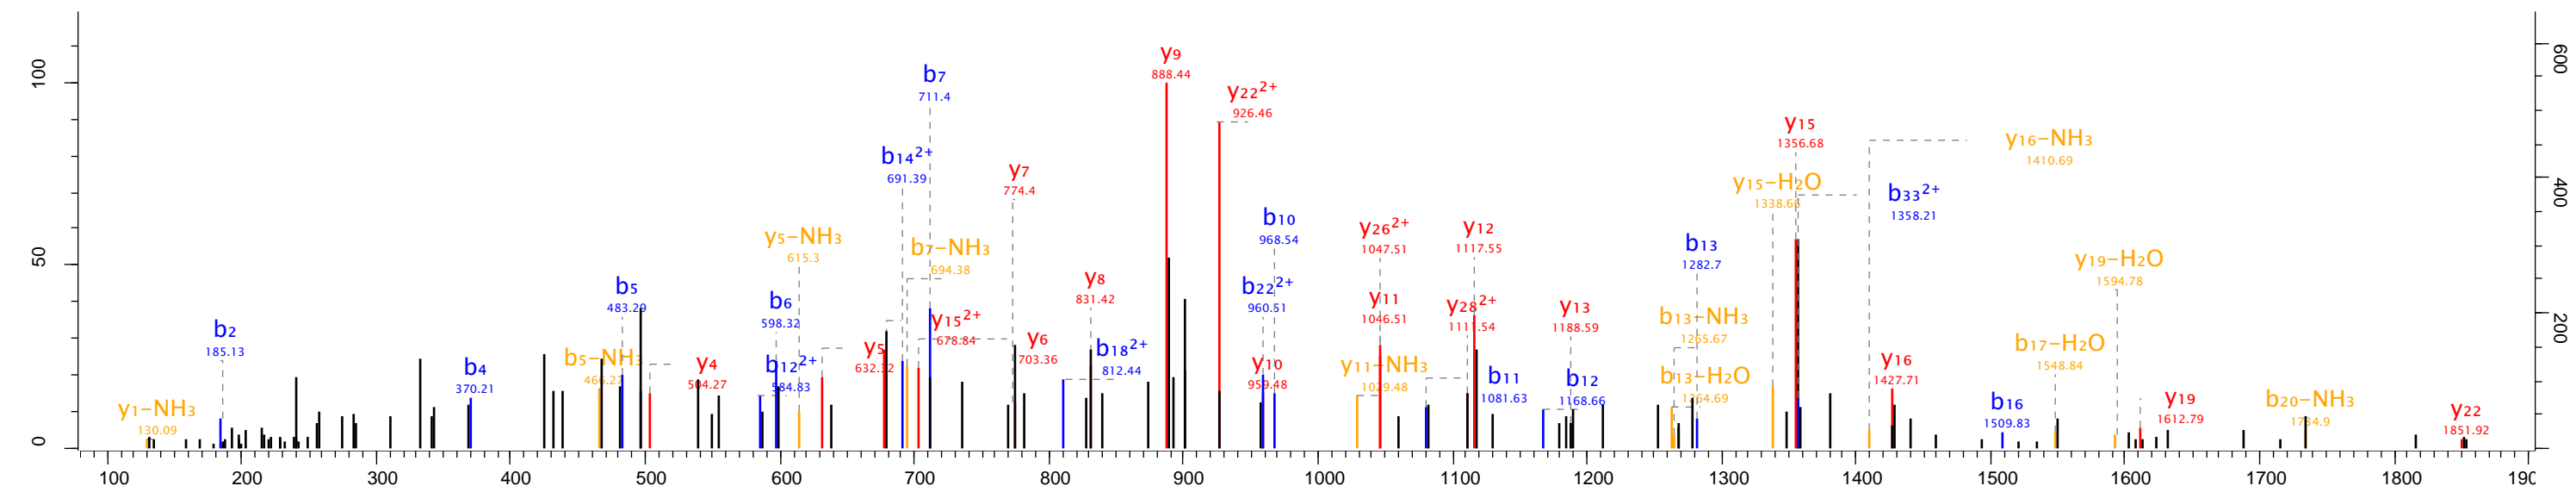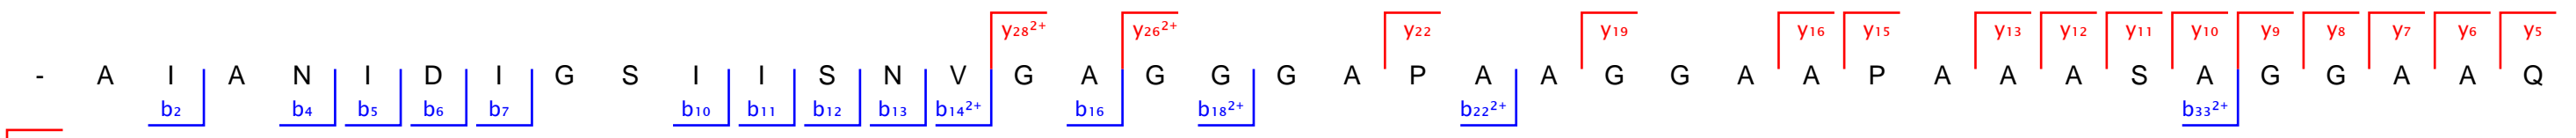

V E SpectraK Annotation for Single-Peptide IDs in 16-cell Embryo using Q-OT-LIT

C. Lombard-Banek, S. Reddy, S. A. Moody, P. Nemes, Mol. Cell. Prot. 2016

Raw file: 2015-01-05\_CL03\_XenEmb\_x2  
 Scan: 48655 Method: ITMS; HCD Score: 58.72 m/z: 901.96

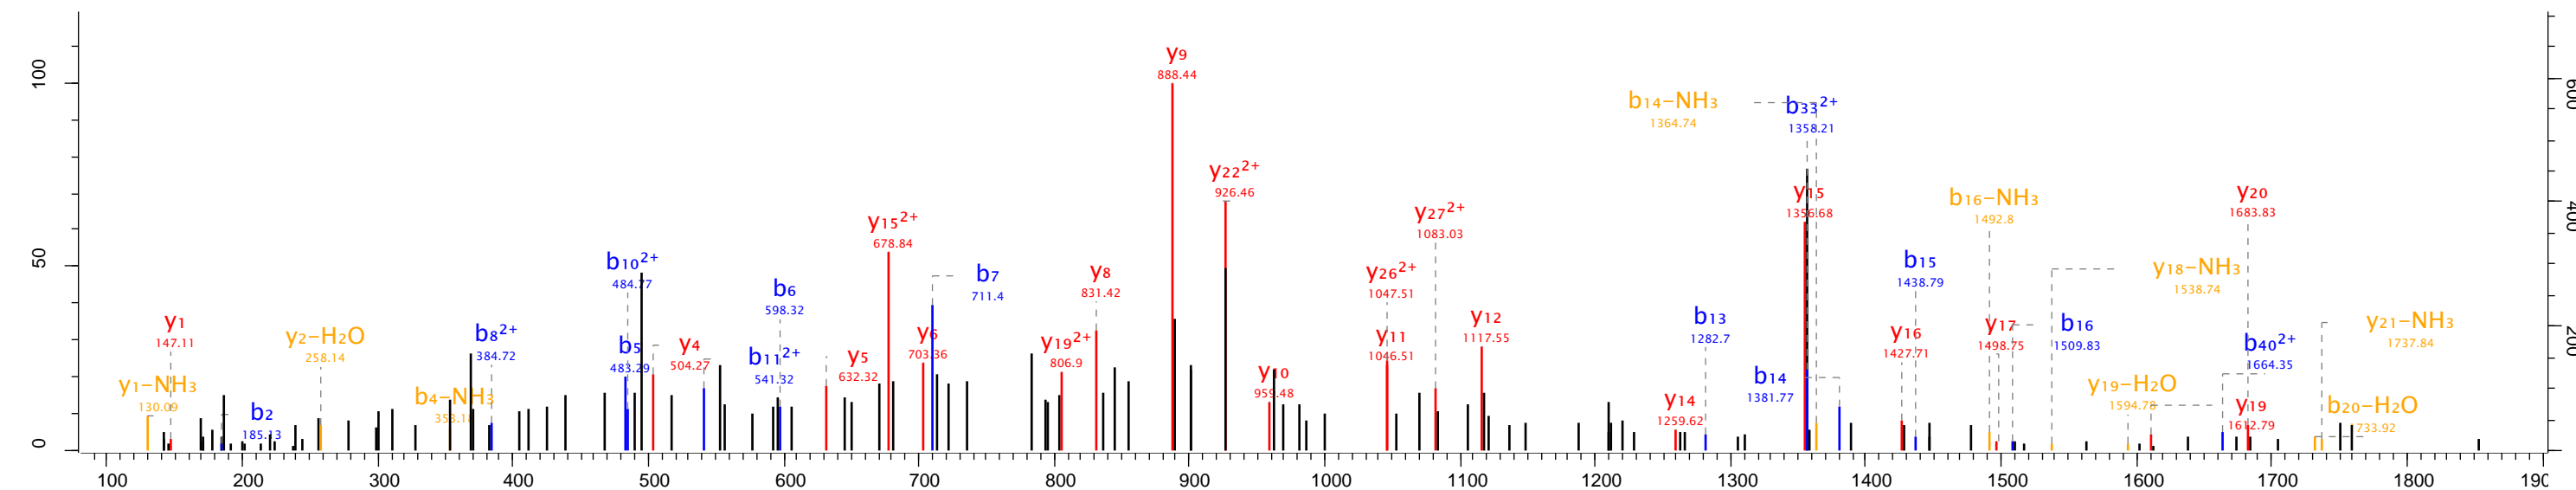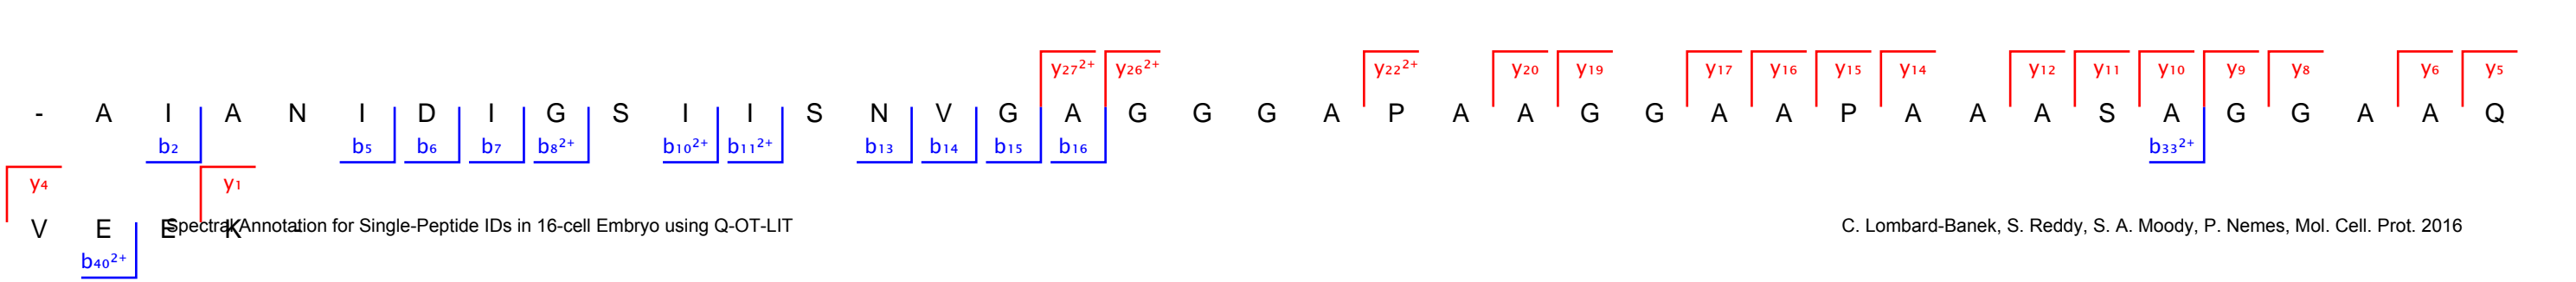

Spectral Annotation for Single-Peptide IDs in 16-cell Embryo using Q-OT-LIT

Raw file Scan Method Score m/z  
 2015-01-05\_CL03\_XenEmb\_x2 48821 ITMS; HCD 24.42 901.97

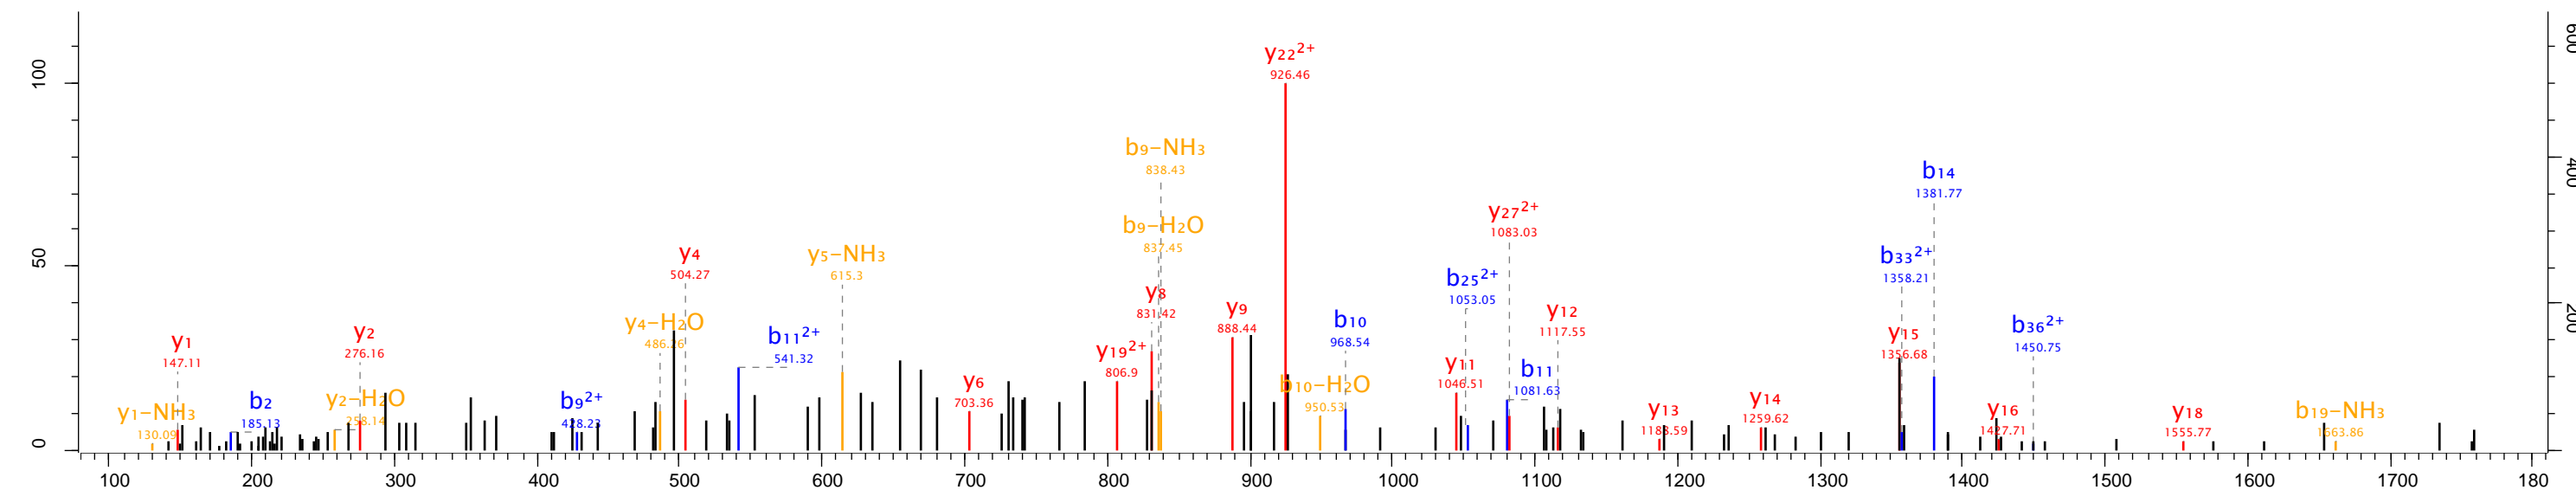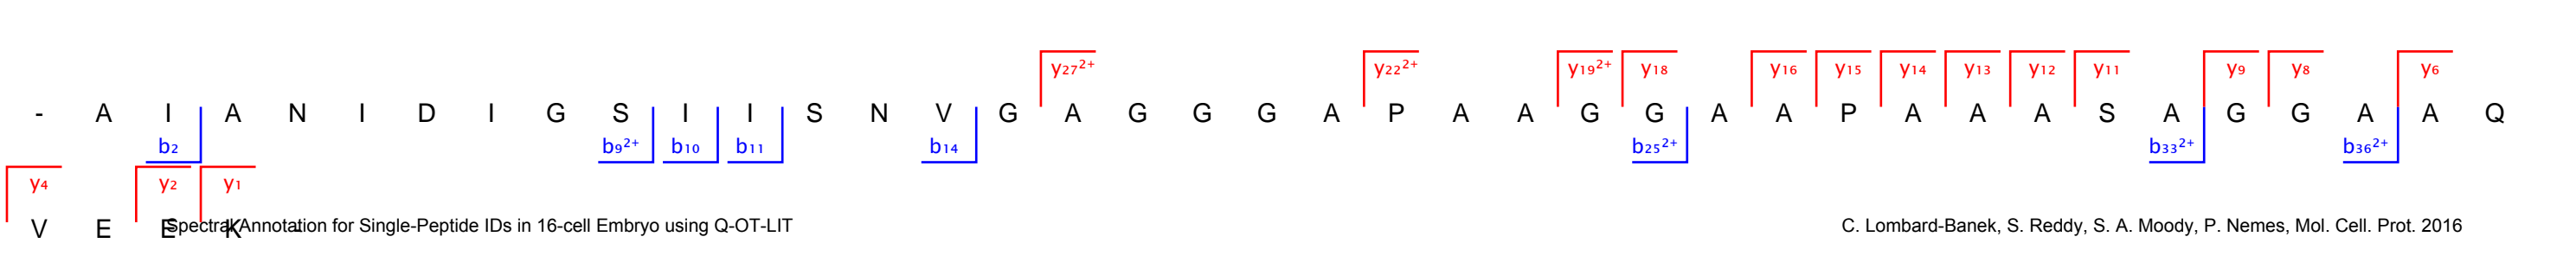

Spectral Annotation for Single-Peptide IDs in 16-cell Embryo using Q-OT-LIT

Raw file: 2015-01-05\_CL03\_XenEmb\_x2  
 Scan: 50600 Method: ITMS; HCD Score: 62.09 m/z: 778.86

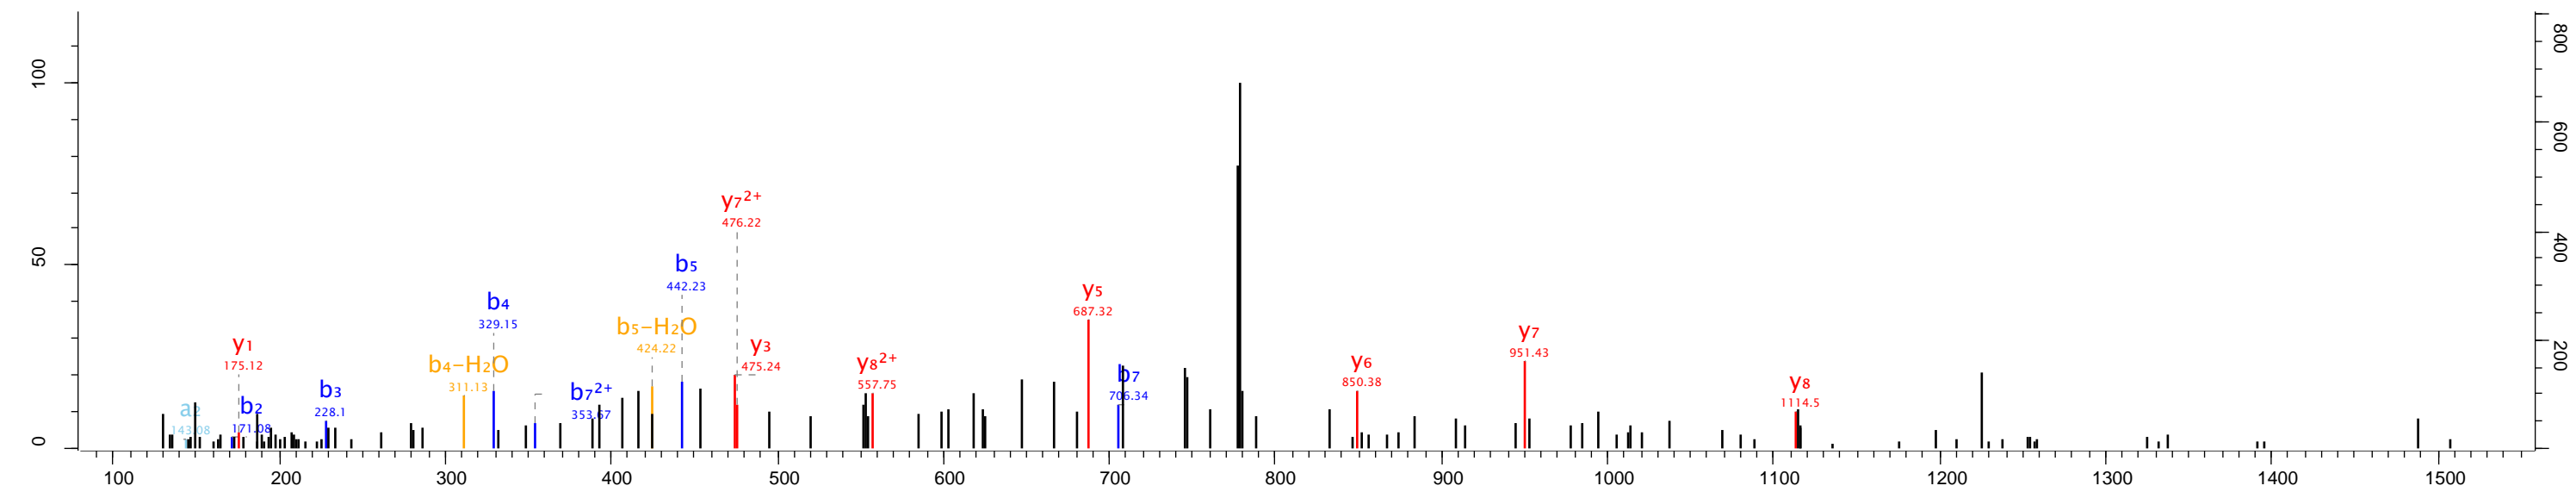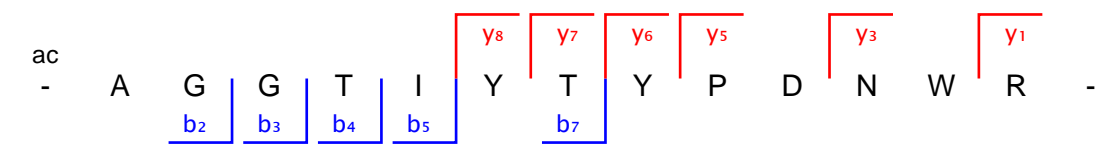

Raw file: 2015-01-05\_CL03\_XenEmb\_x2  
 Scan: 50838 Method: ITMS; HCD Score: 87.72 m/z: 778.36

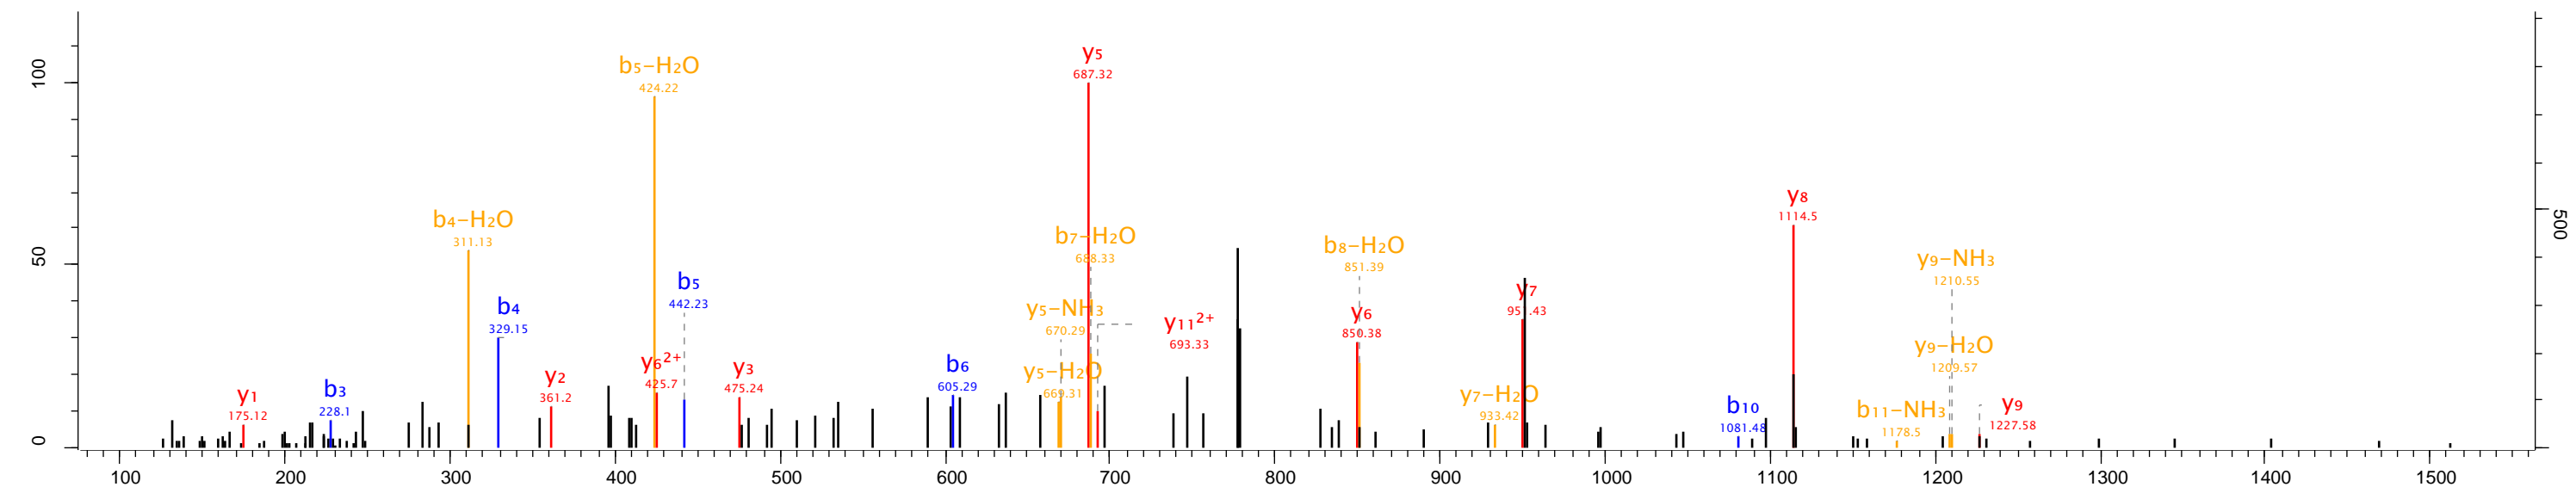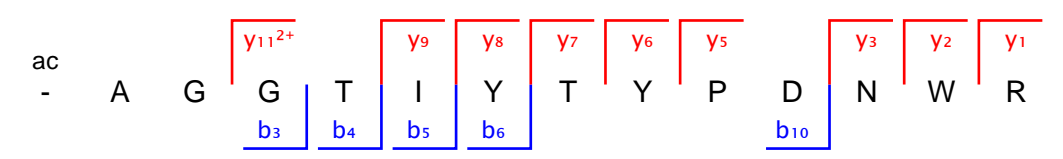

Spectral Annotation for Single-Peptide IDs in 16-cell Embryo using Q-OT-LIT

Raw file: 2015-01-05\_CL03\_XenEmb\_x2  
 Scan: 50844 Method: ITMS; HCD Score: 81.57 m/z: 778.36

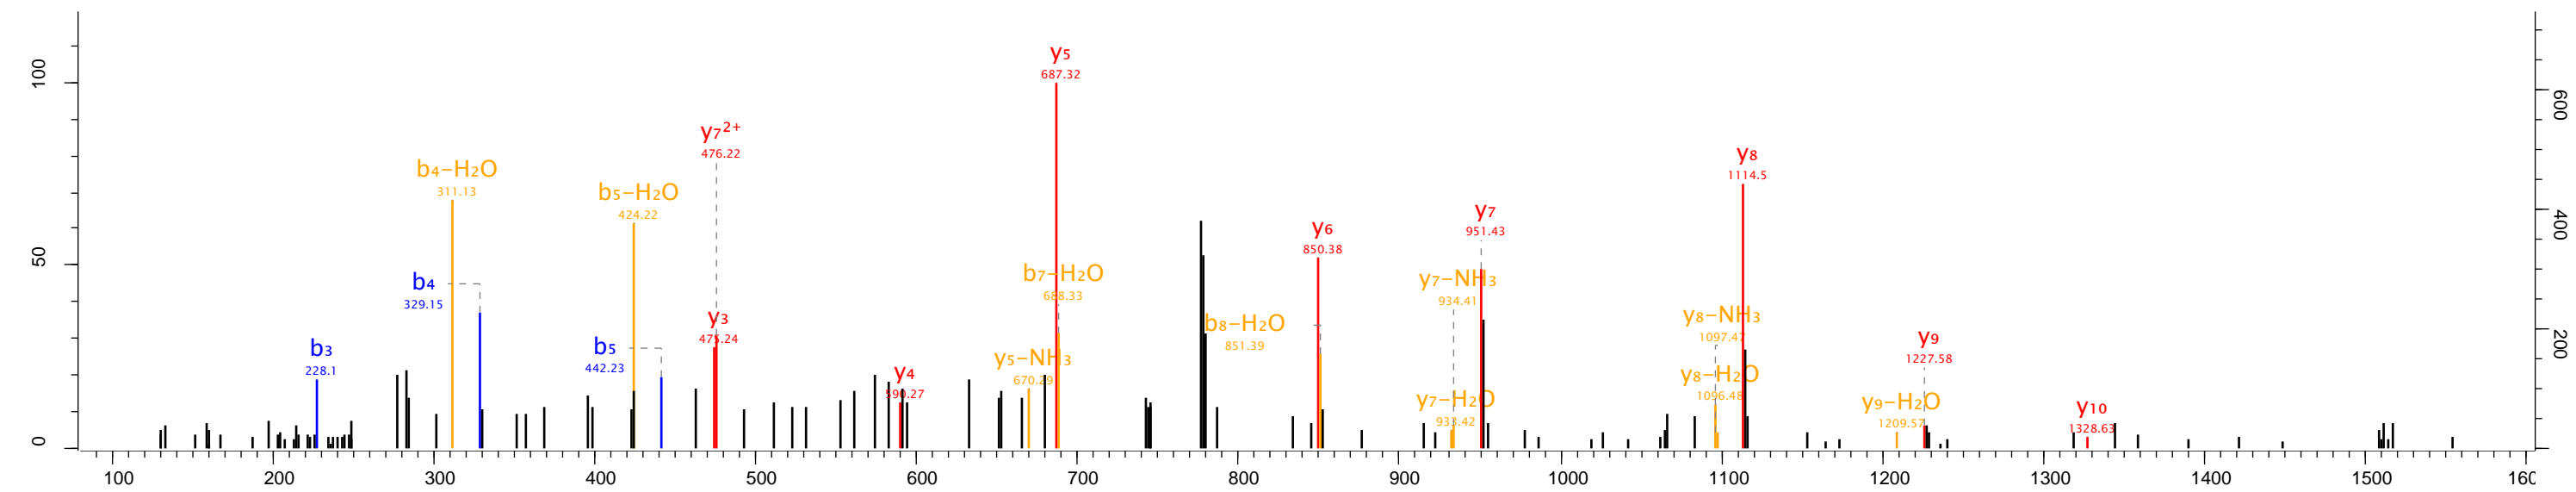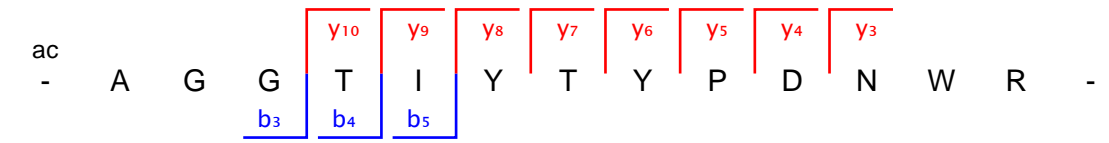

Spectral Annotation for Single-Peptide IDs in 16-cell Embryo using Q-OT-LIT
