# Supplementary material
Source: PubMed Central journal article supplement (PMC4974349)
Supplement: 10.1074_M115.057760_mcp.M115.057760-5.pdf [file 10.1074_M115.057760_mcp.M115.057760-5.pdf]

Raw file 2014-10-22\_CL03\_Embx2dil\_4Hz Scan 4226 Method TOF; CID Score 99.69 m/z 548.82

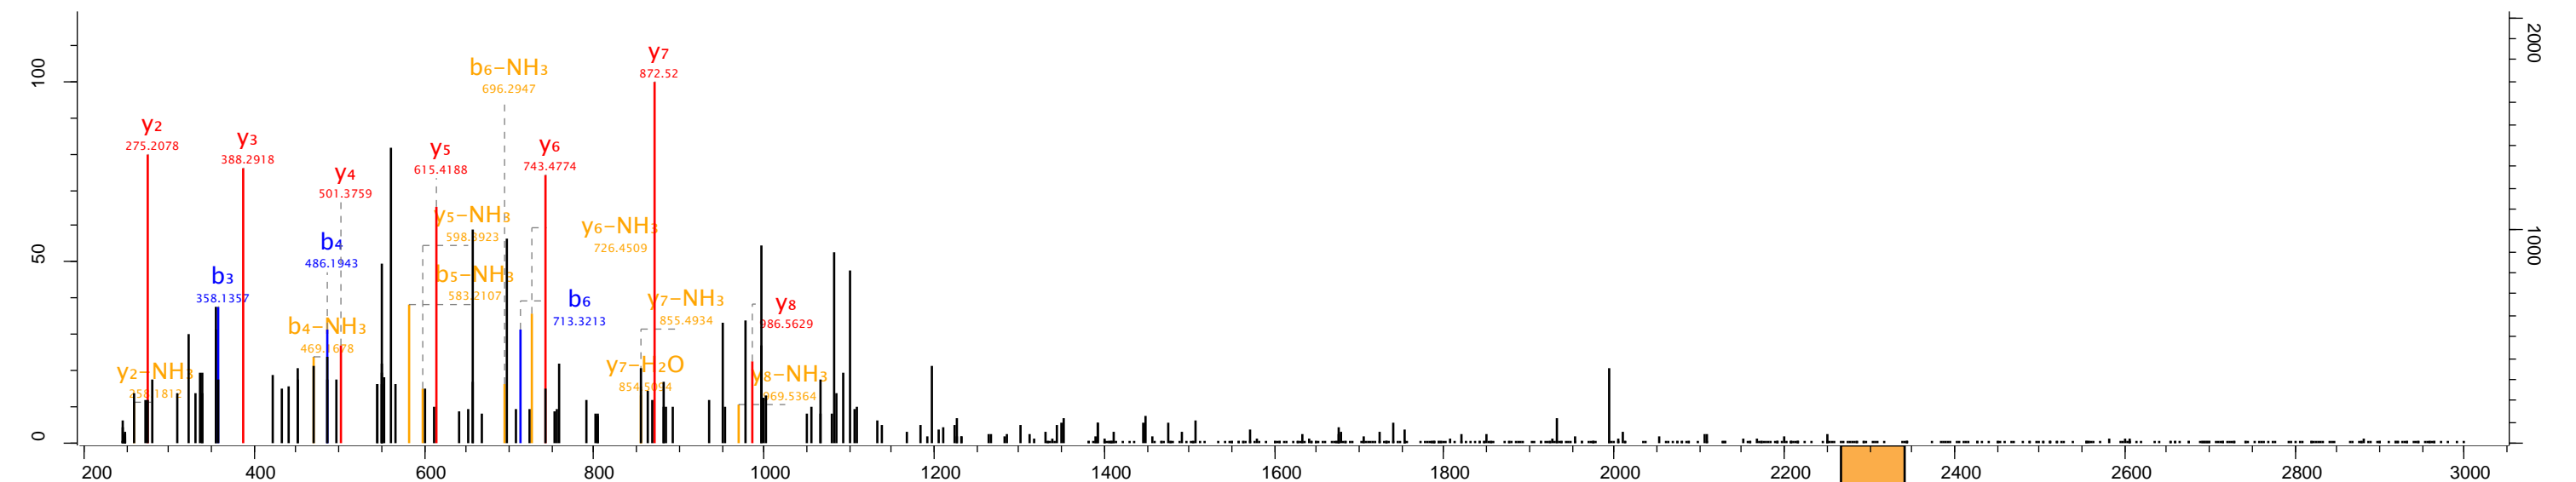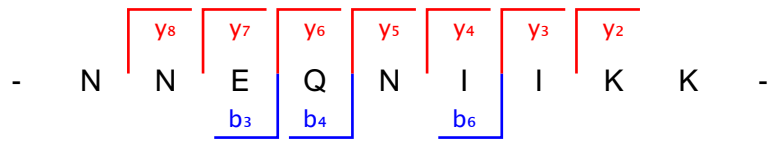

Spectral Annotation for Single-Peptide IDs in 16-cell Embryo using qQ-TOF

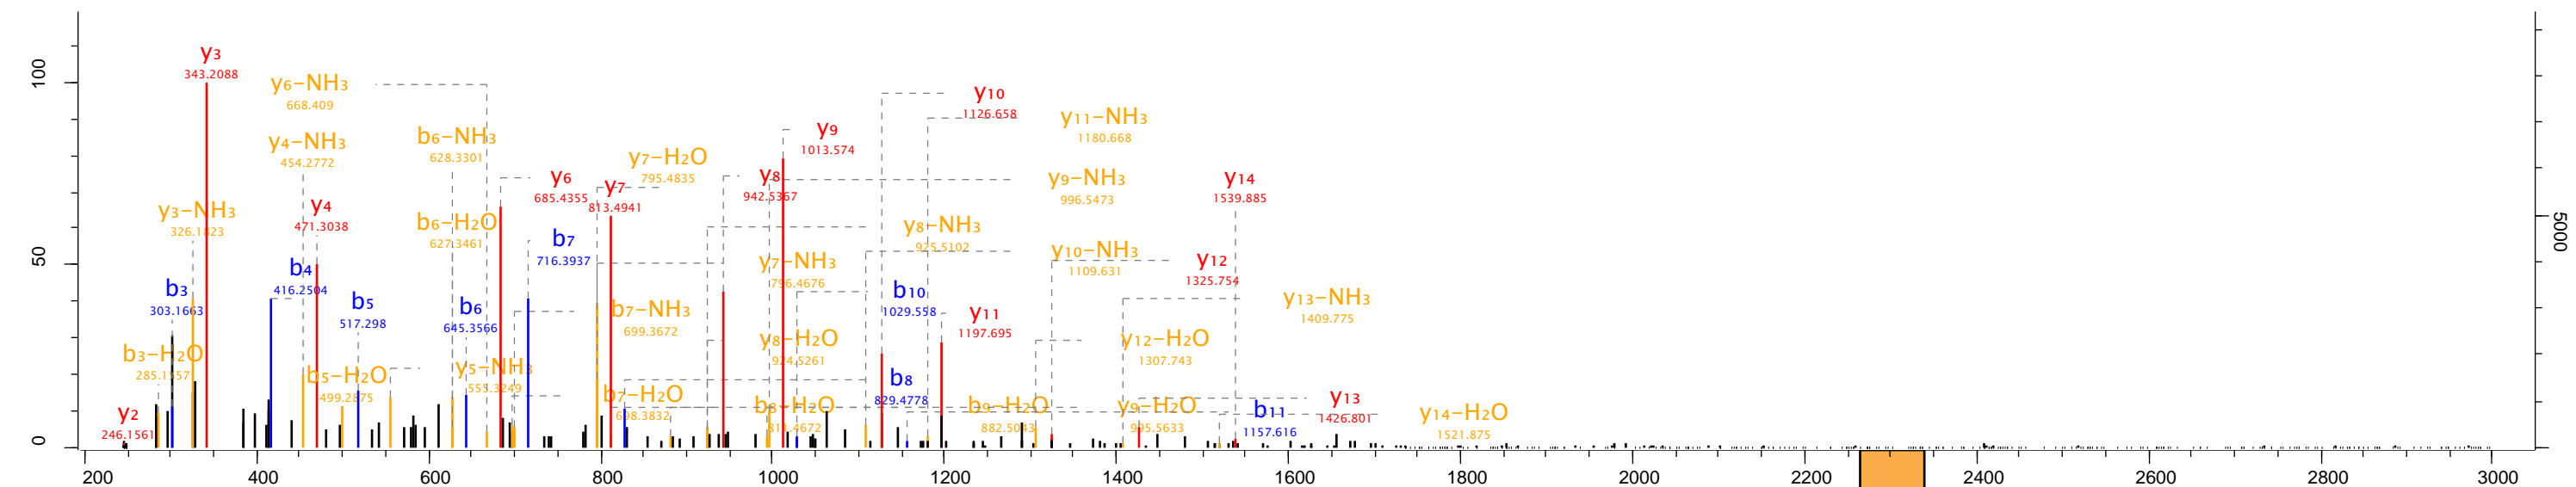

- S S K I T Q A I A E Q I T K P A R -

Annotations below the sequence:

- Red boxes above: y14 (I), y13 (T), y12 (Q), y11 (A), y10 (I), y9 (A), y8 (E), y7 (Q), y6 (I)
- Blue boxes below: b3 (K), b4 (I), b5 (T), b6 (Q), b7 (A), b8 (I), b10 (E), b11 (Q)

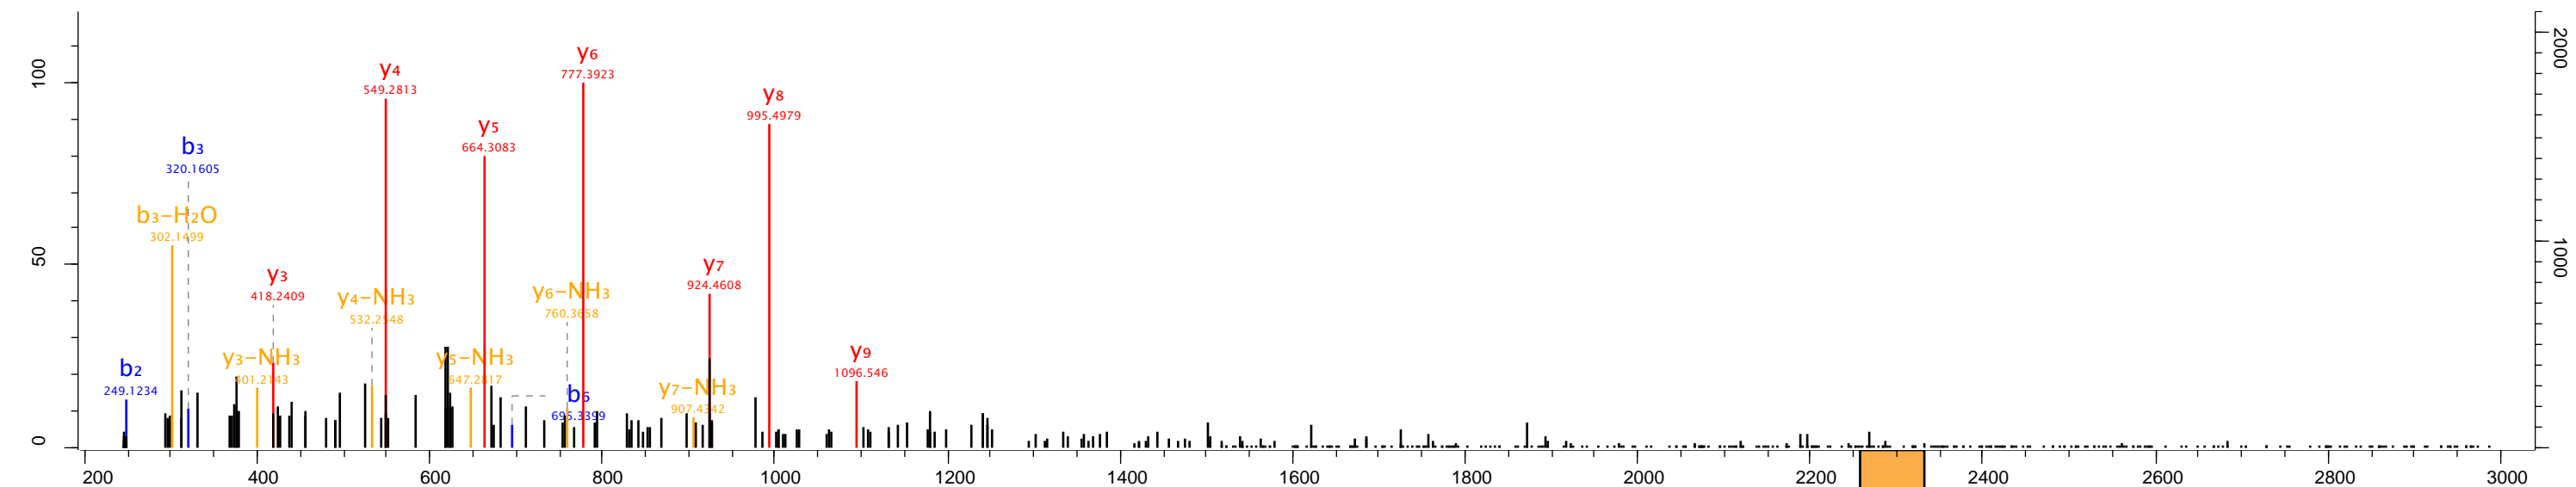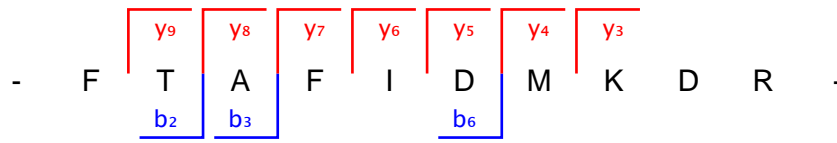

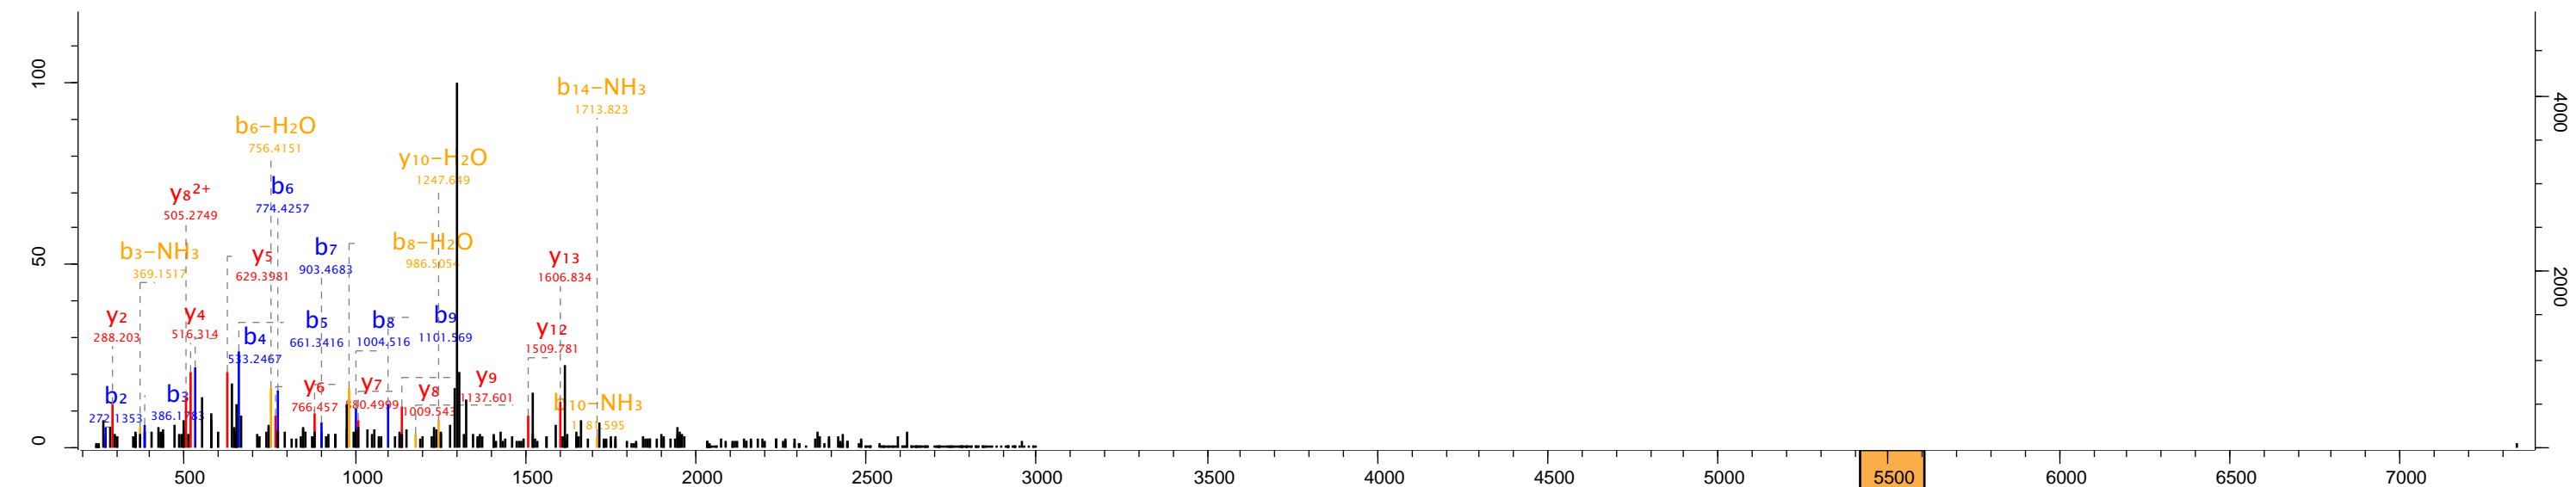

5500

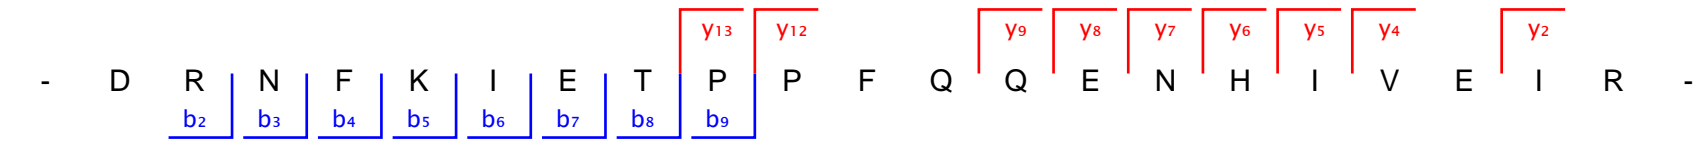

Raw file: 2014-10-22\_CL03\_Embx2dil\_4Hz  
 Scan: 4657 Method: TOF; CID Score: 150.69 m/z: 670.87

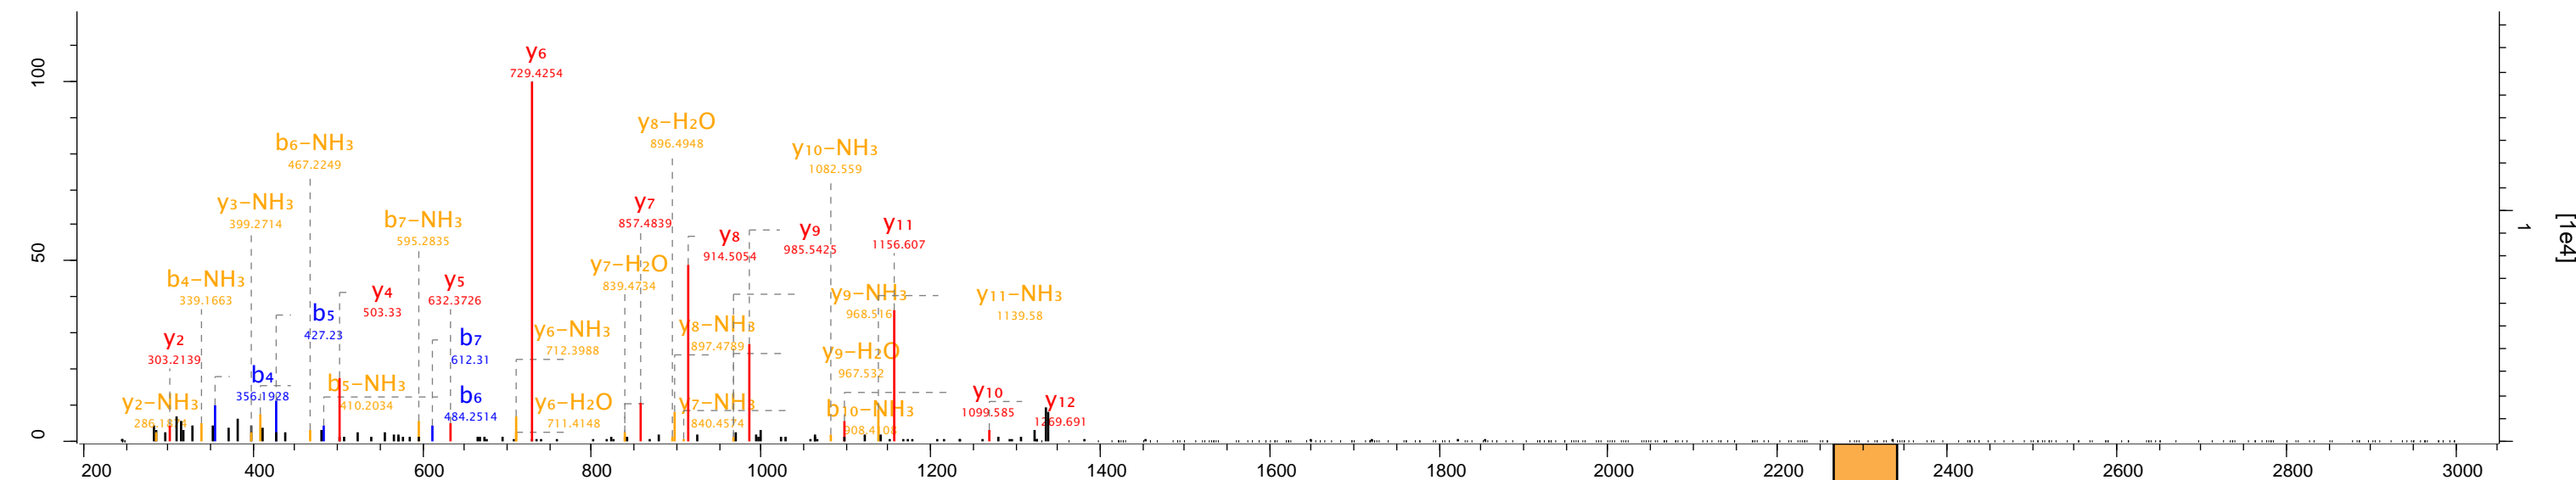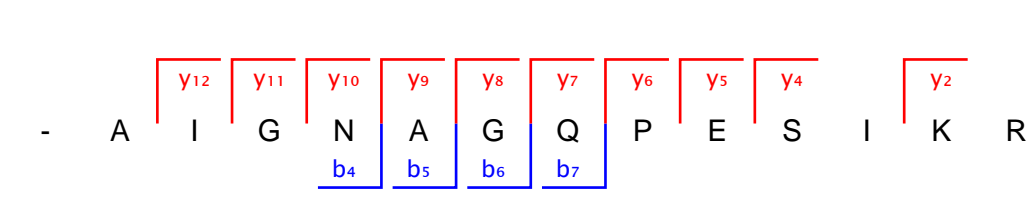

Spectral Annotation for Single-Peptide IDs in 16-cell Embryo using qQ-TOF

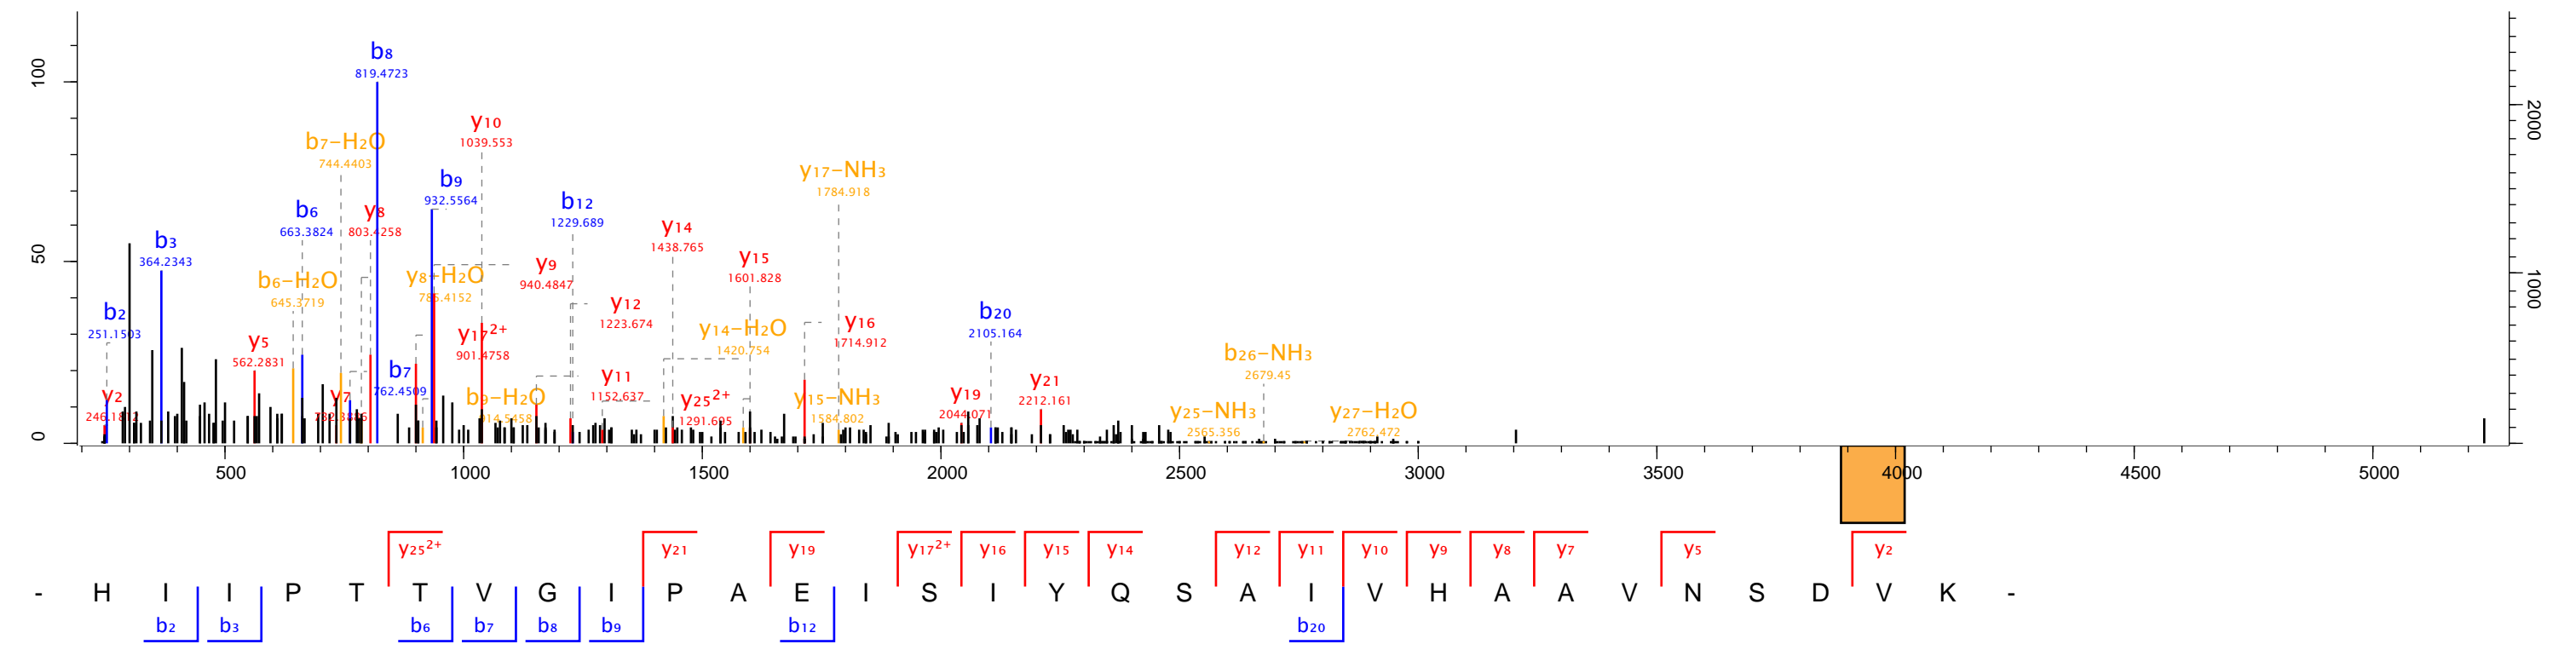

Spectral Annotation for Single-Peptide IDs in 16-cell Embryo using qQ-TOF

Raw file  
 2014-10-22\_CL03\_Embx2dil\_4Hz  
 Scan 5624 Method TOF; CID Score 39.66 m/z 614.75

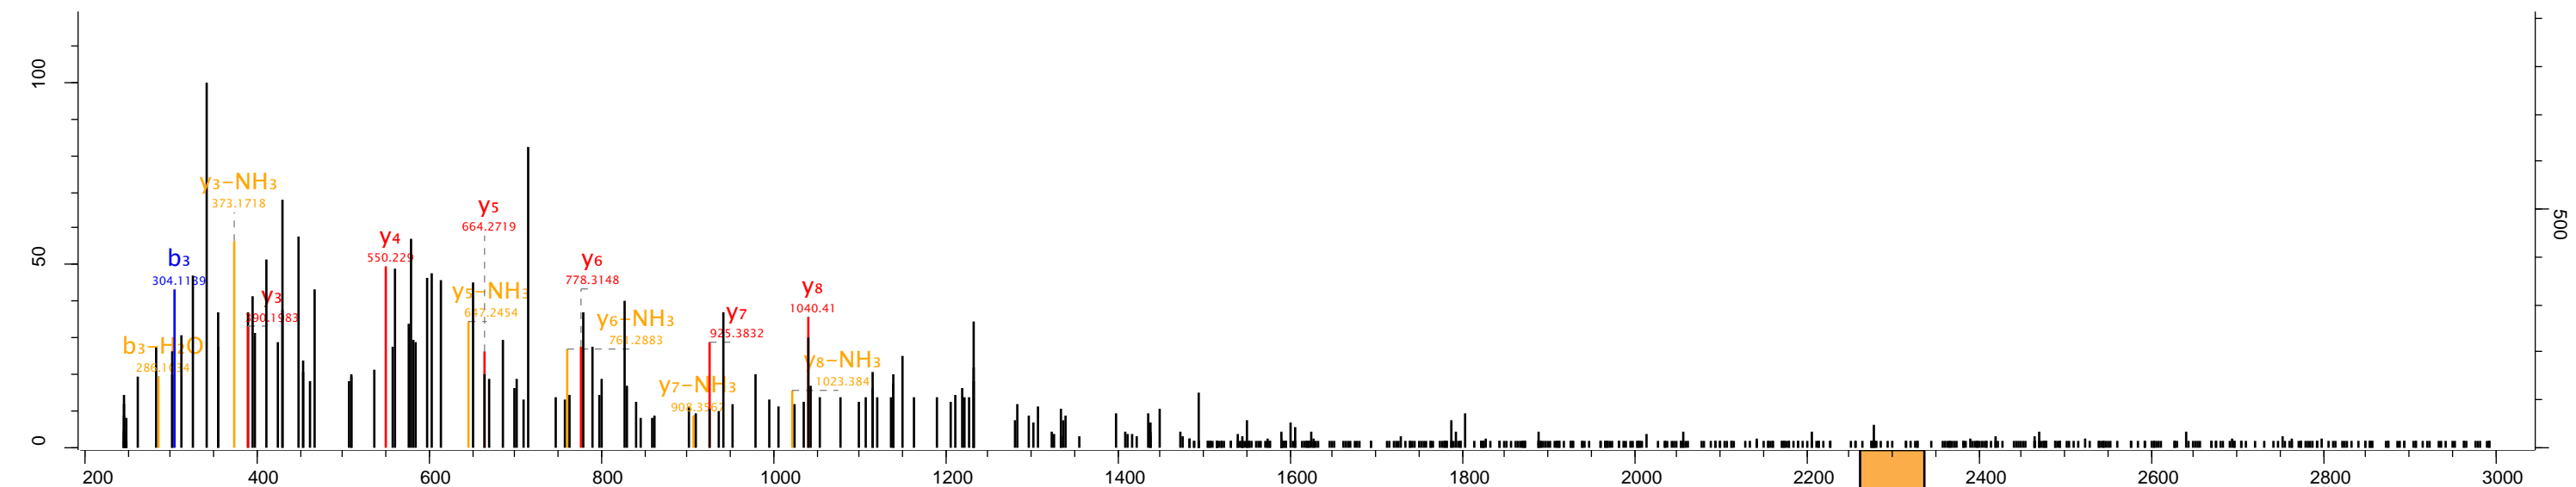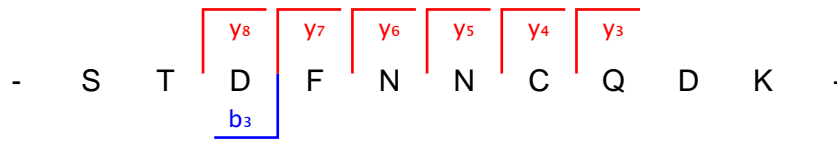

Raw file: 2014-10-22\_CL03\_Embx2dil\_4Hz  
 Scan: 5659 Method: TOF; CID Score: 112.83 m/z: 583.32

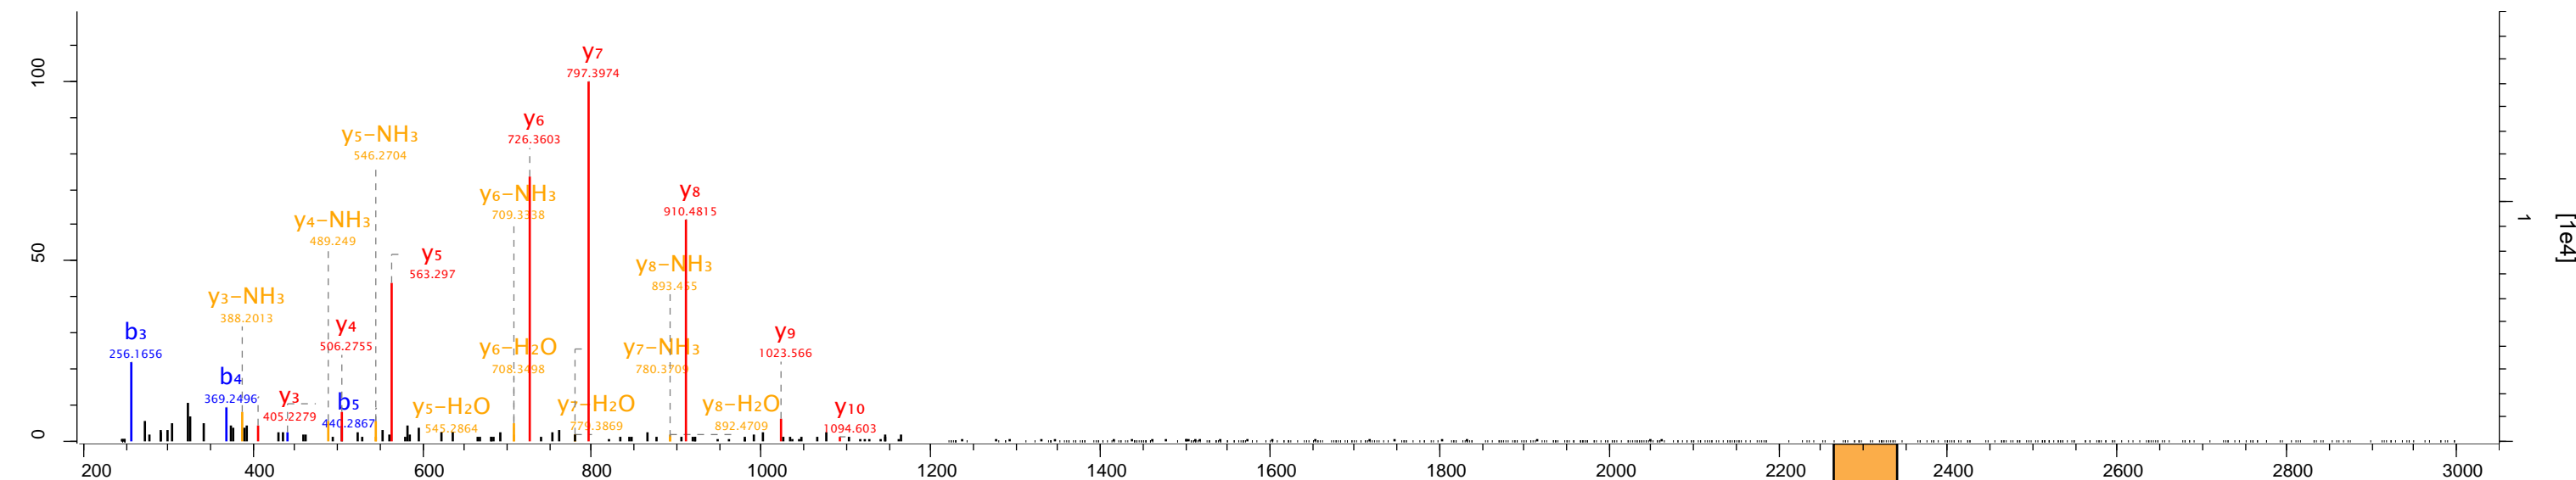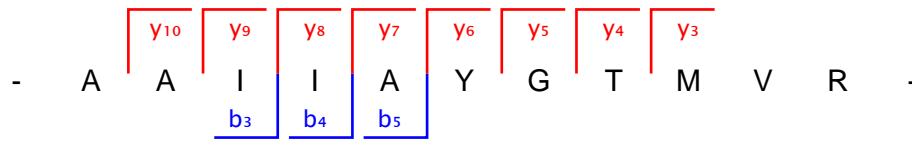



Raw file: 2014-10-22\_CL03\_Embx2dil\_4Hz  
 Scan: 5887 Method: TOF; CID Score: 59.26 m/z: 644.36

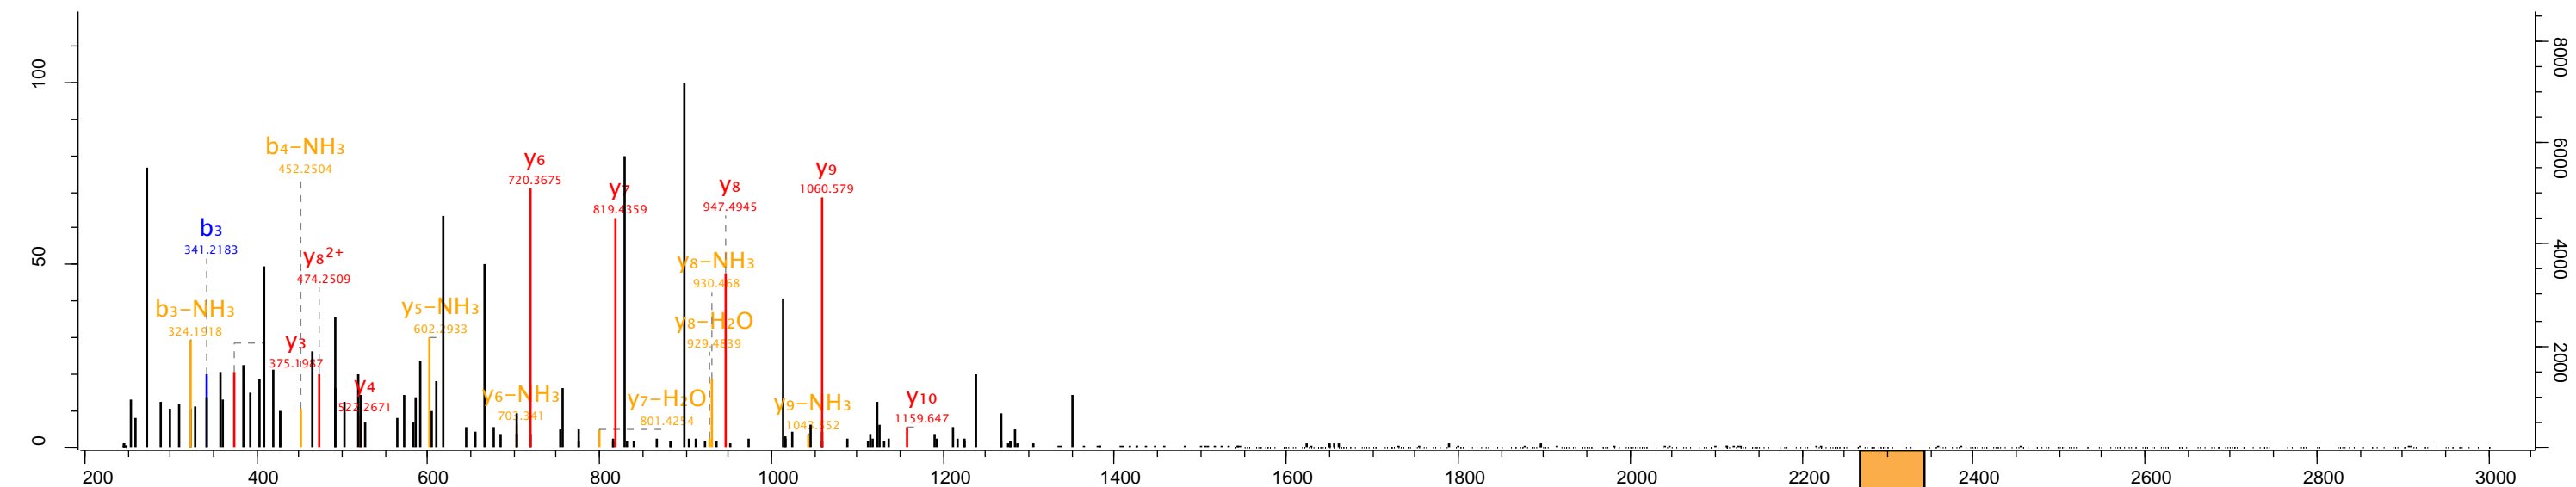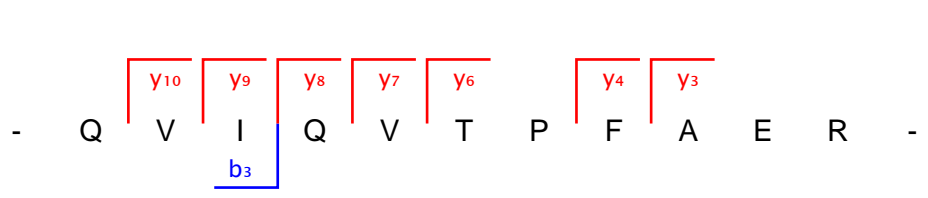

Spectral Annotation for Single-Peptide IDs in 16-cell Embryo using qQ-TOF

Raw file: 2014-10-22\_CL03\_Embx2dil\_4Hz  
 Scan: 6240 Method: TOF; CID Score: 33.84 m/z: 736.43

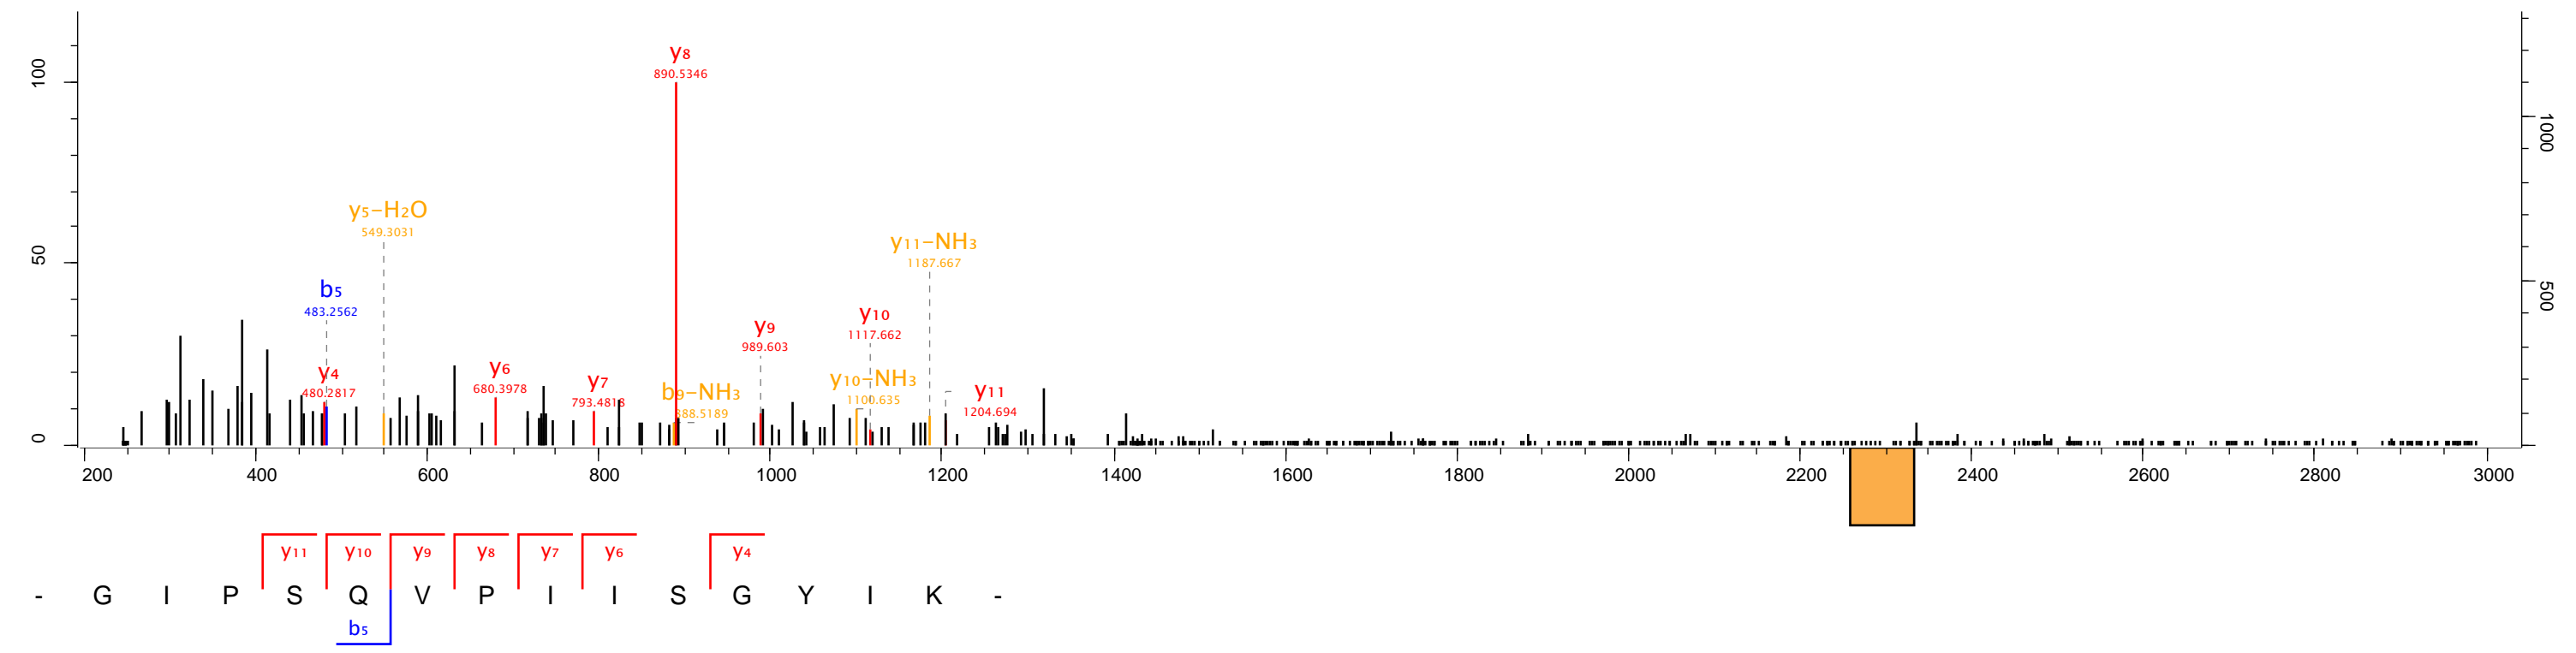

- G I P S Q V P I I S G Y I K -  
 b5 is underlined under S and Q.  
 y11, y10, y9, y8, y7, y6, and y4 are bracketed above S, Q, V, P, I, I, and S respectively.

Raw file Scan Method Score m/z  
 2014-10-22\_CL04\_Embx2dil\_4Hz 3034 TOF; CID 48.24 366.73

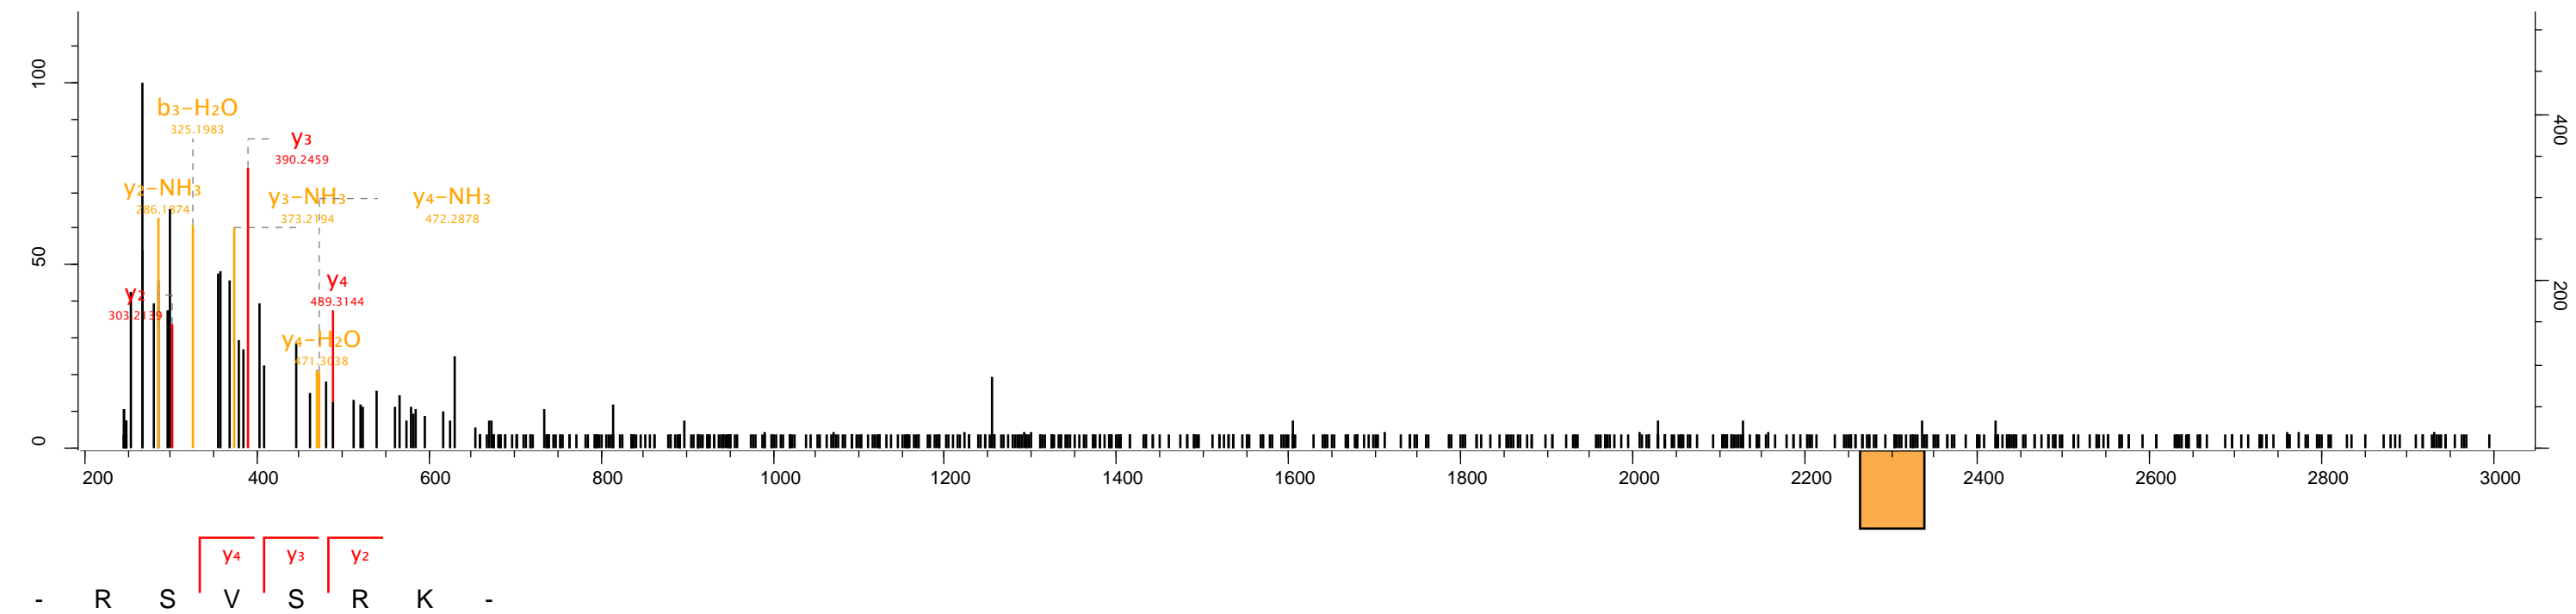

Raw file: 2014-10-22\_CL04\_Embx2dil\_4Hz  
 Scan: 3593 Method: TOF; CID Score: 63.3 m/z: 386.22

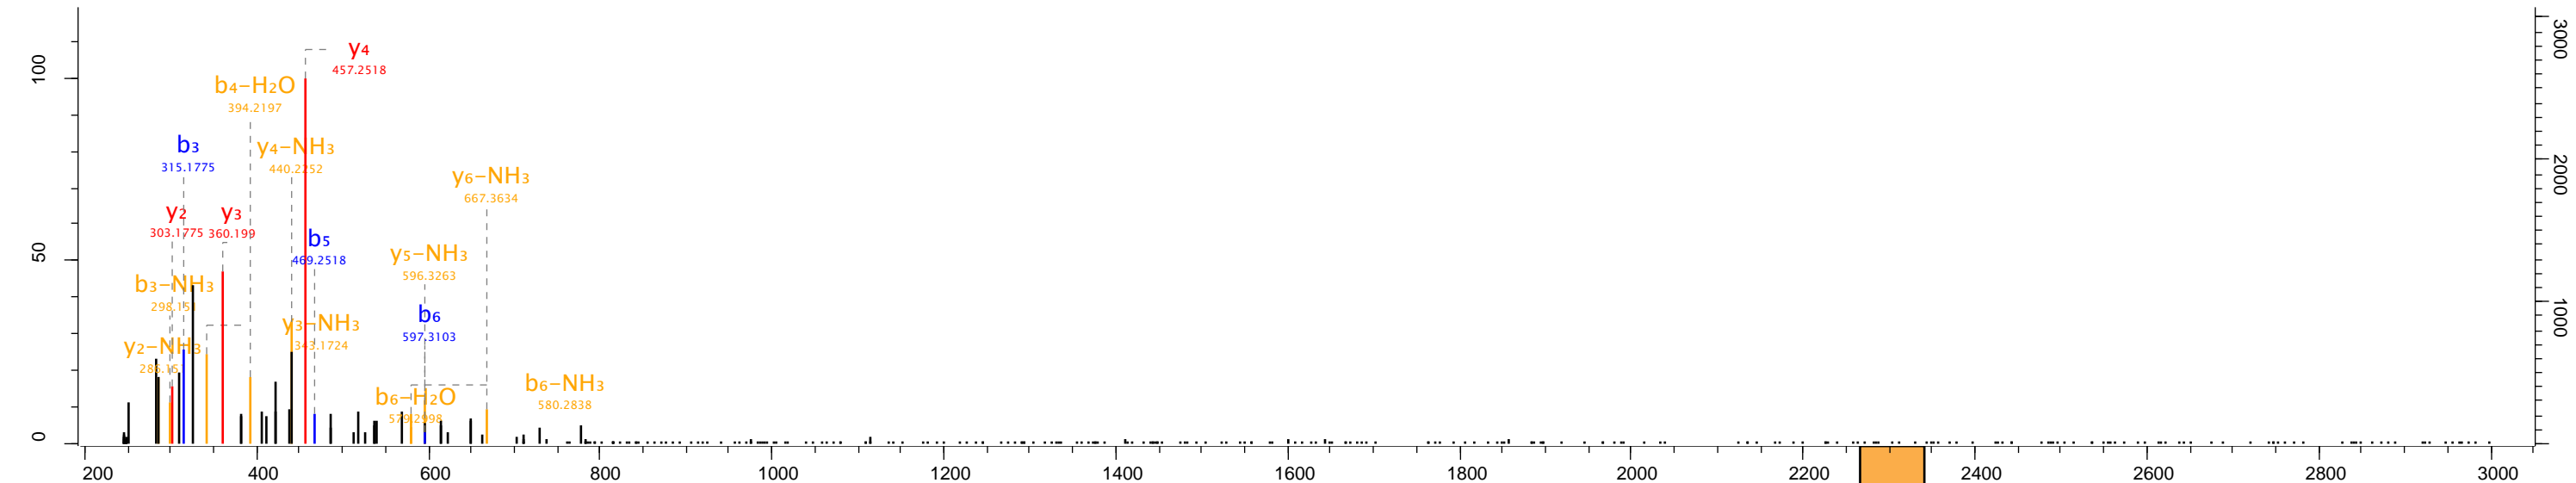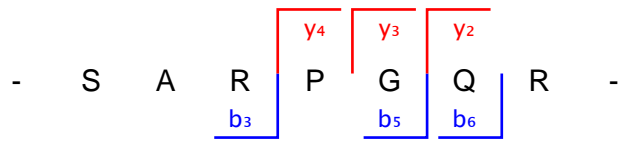

Raw file: 2014-10-22\_CL04\_Embx2dil\_4Hz  
 Scan: 3699 Method: TOF; CID Score: 62.34 m/z: 420.24

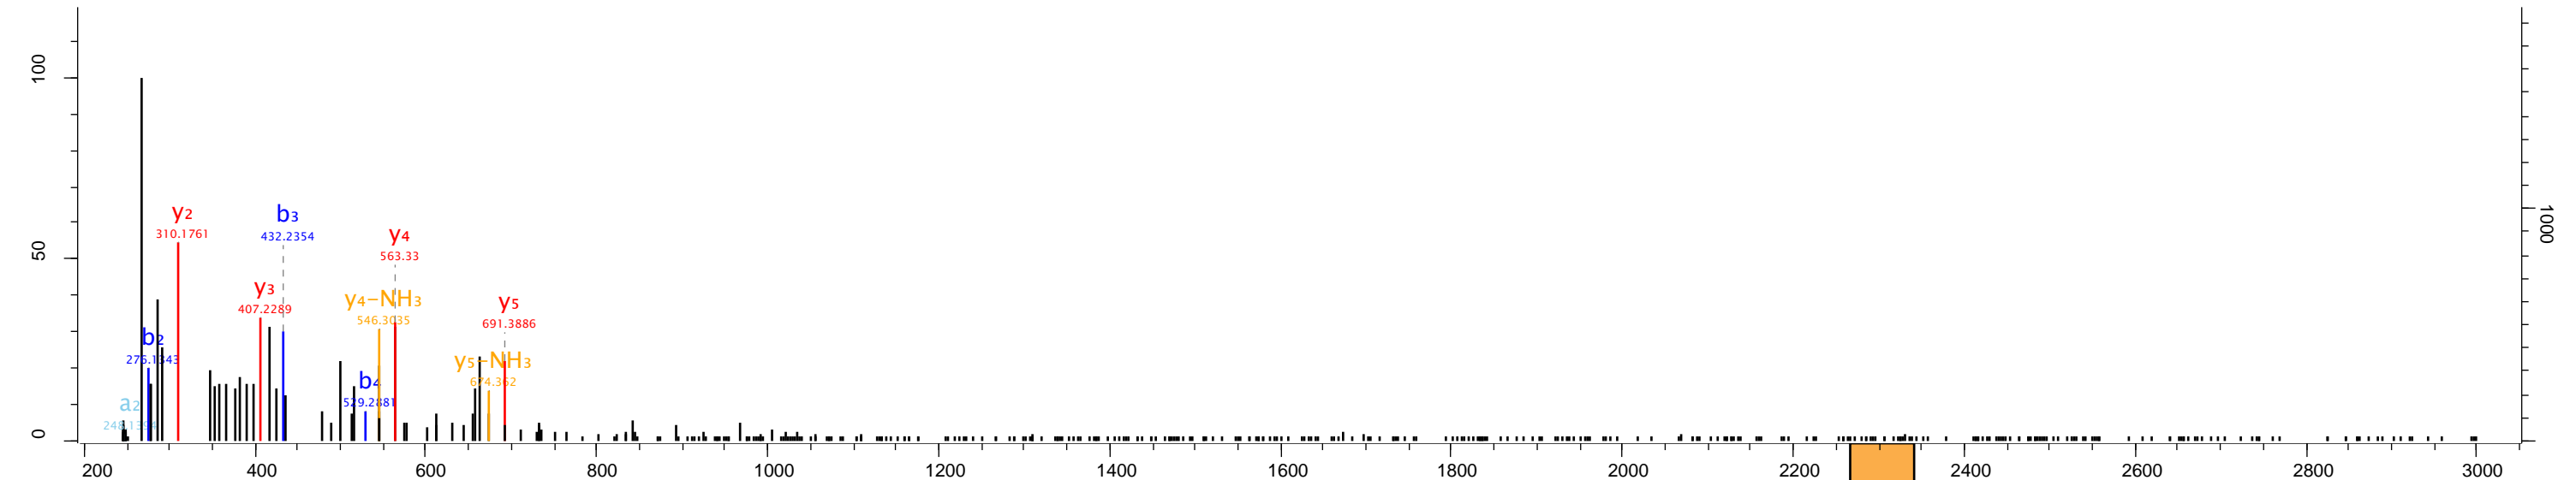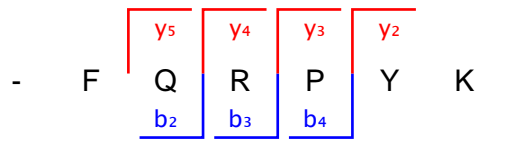

Spectral Annotation for Single-Peptide IDs in 16-cell Embryo using qQ-TOF

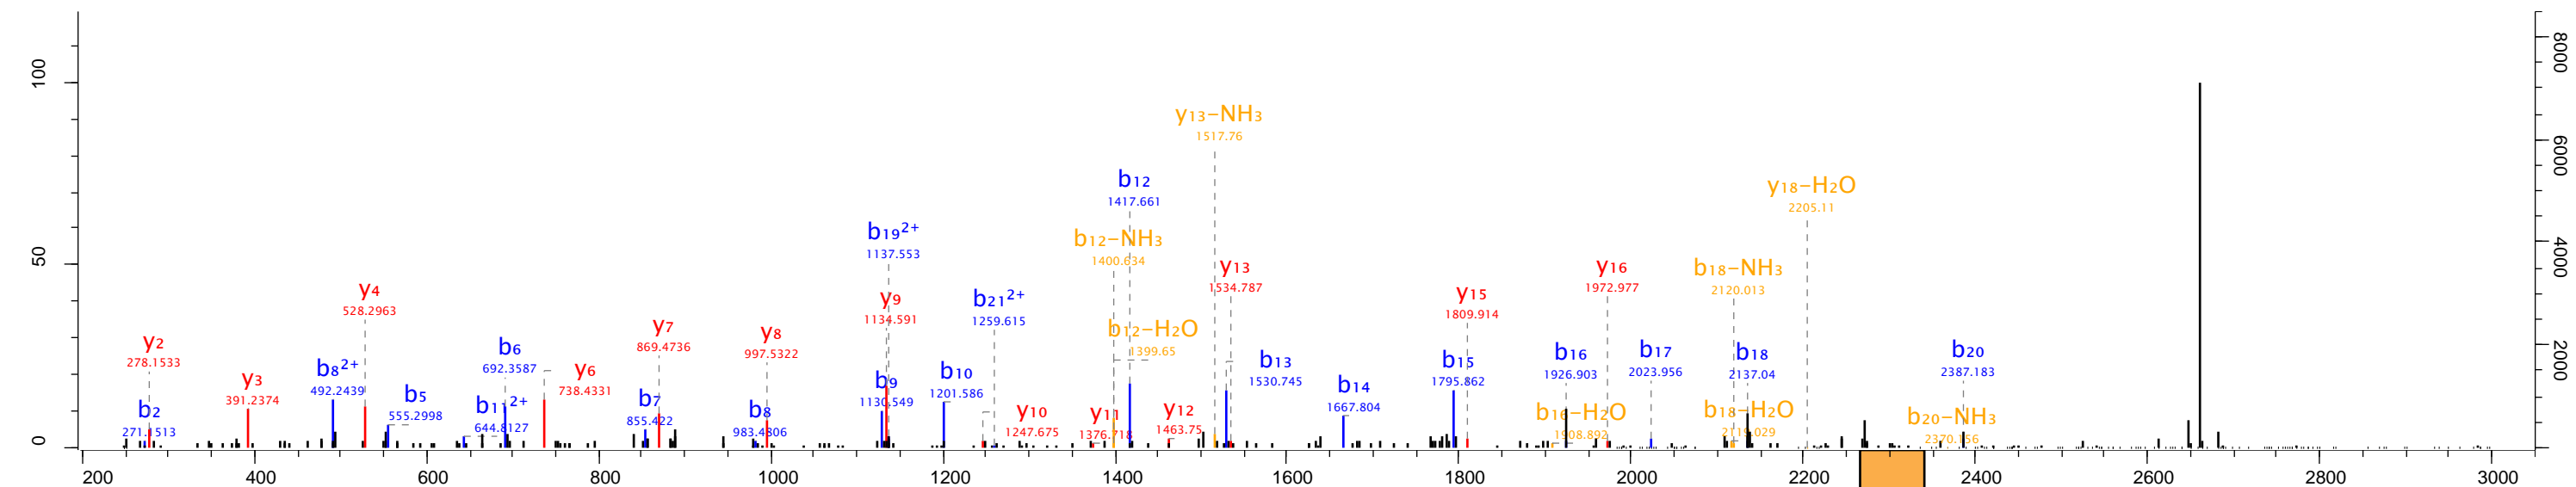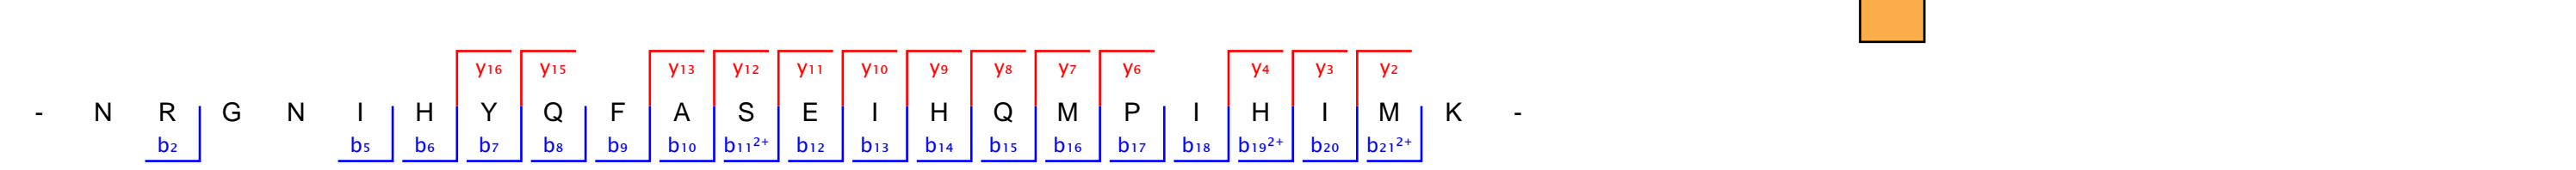

Raw file: 2014-10-22\_CL04\_Embx2dil\_4Hz  
 Scan: 3994 Method: TOF; CID Score: 117.01 m/z: 480.23

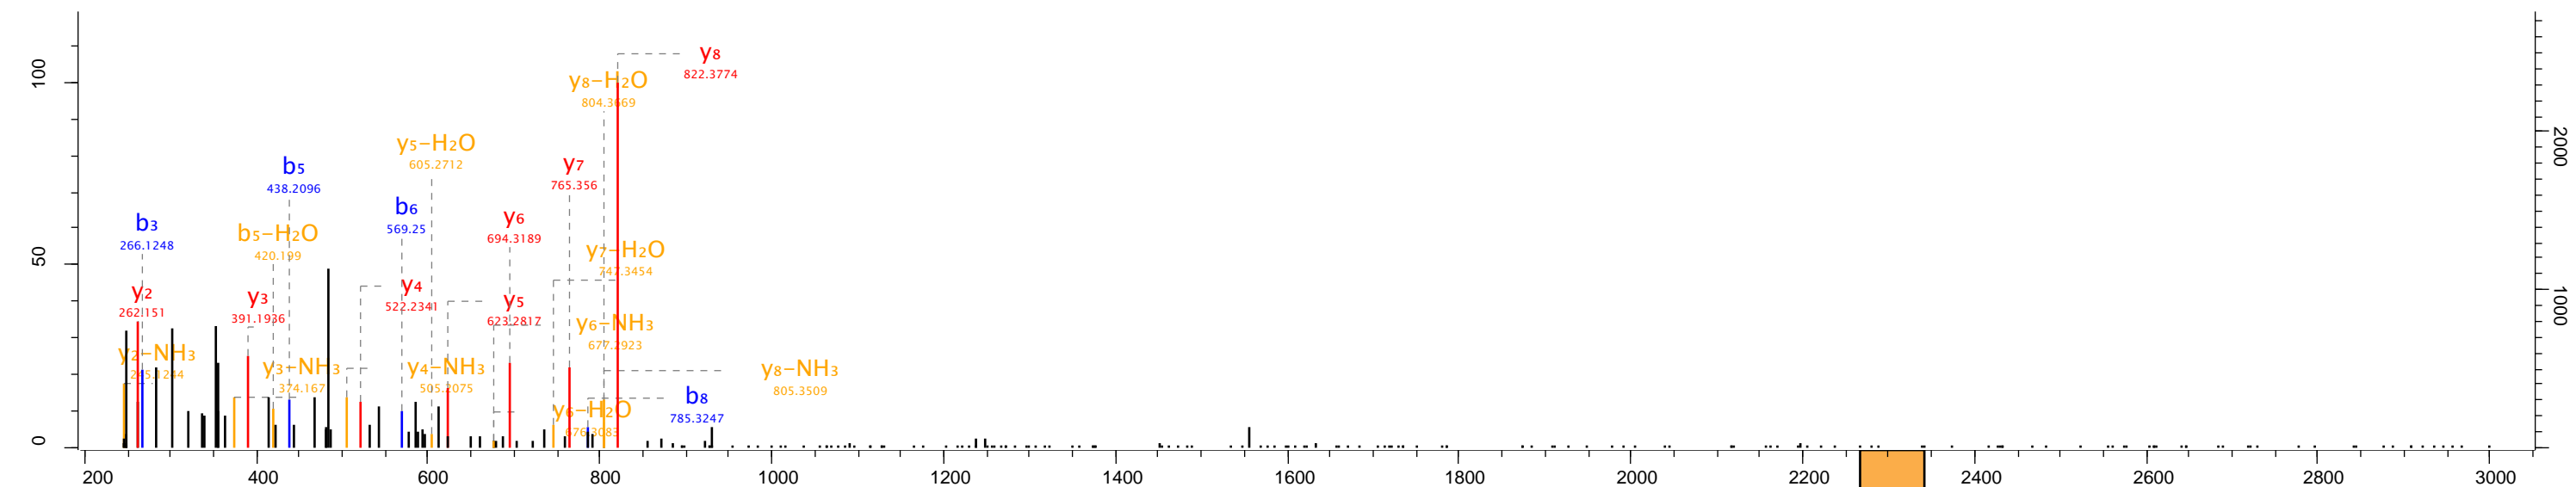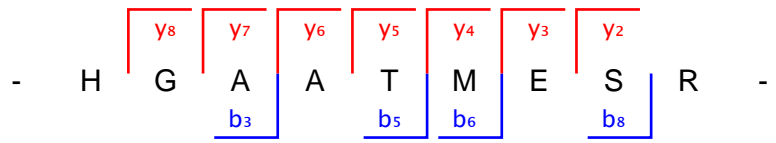

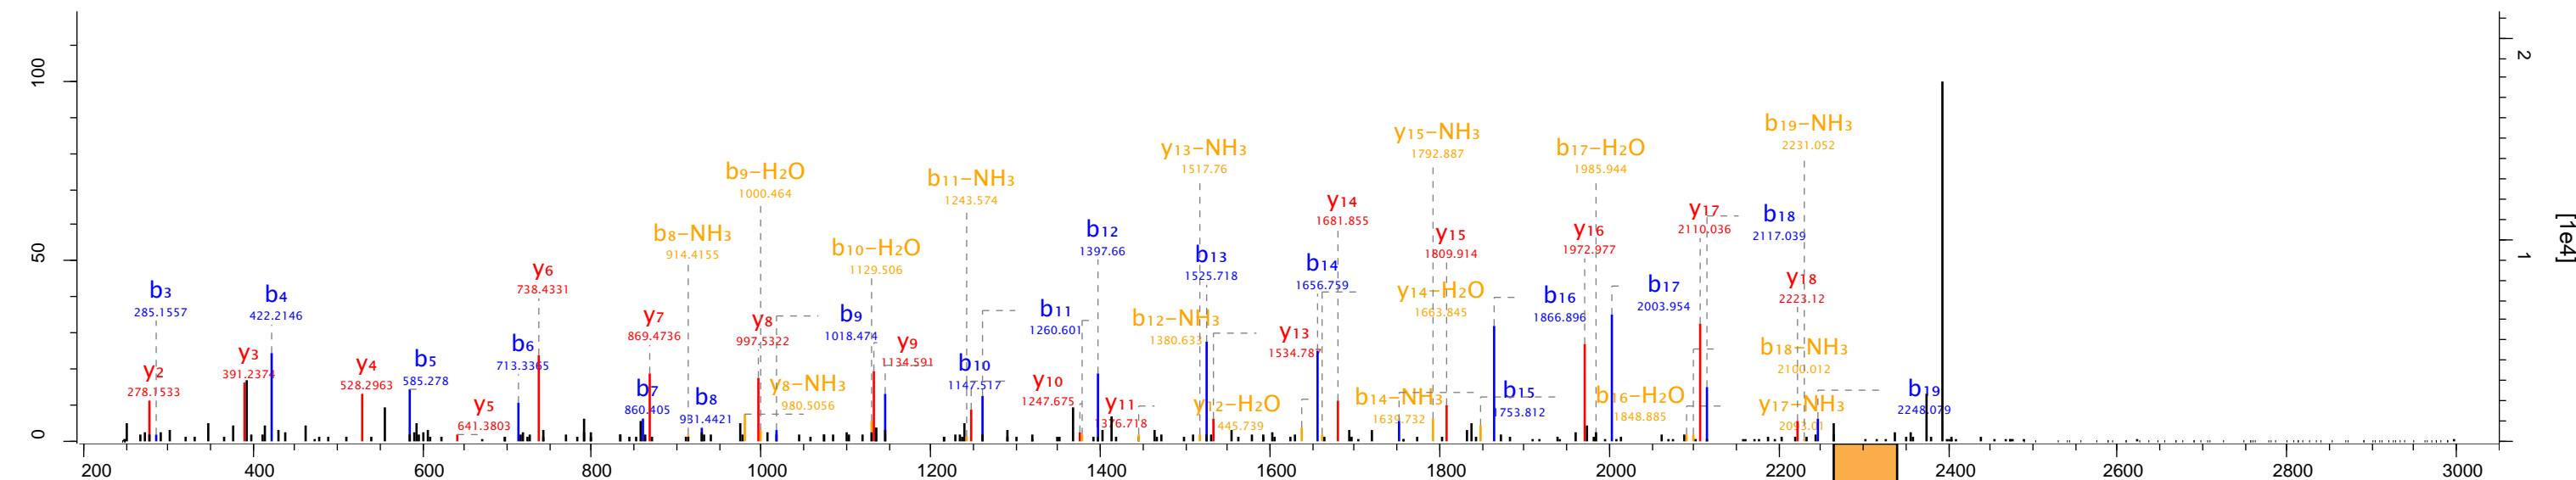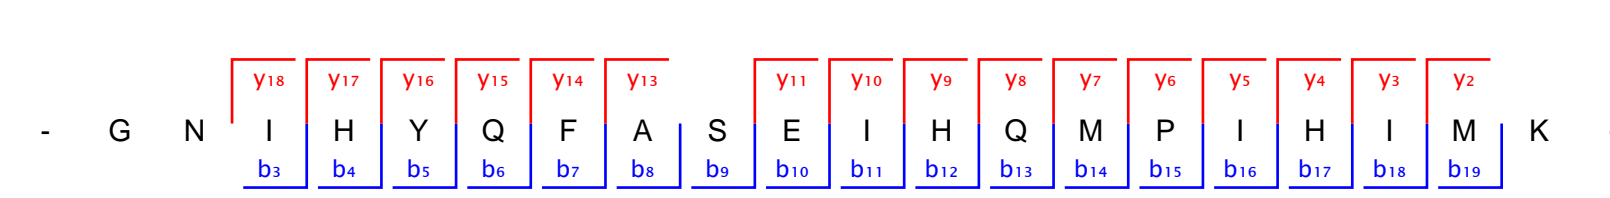



Raw file 2014-10-22\_CL04\_Embx2dil\_4Hz Scan 4033 Method TOF; CID Score 147.14 m/z 763.42

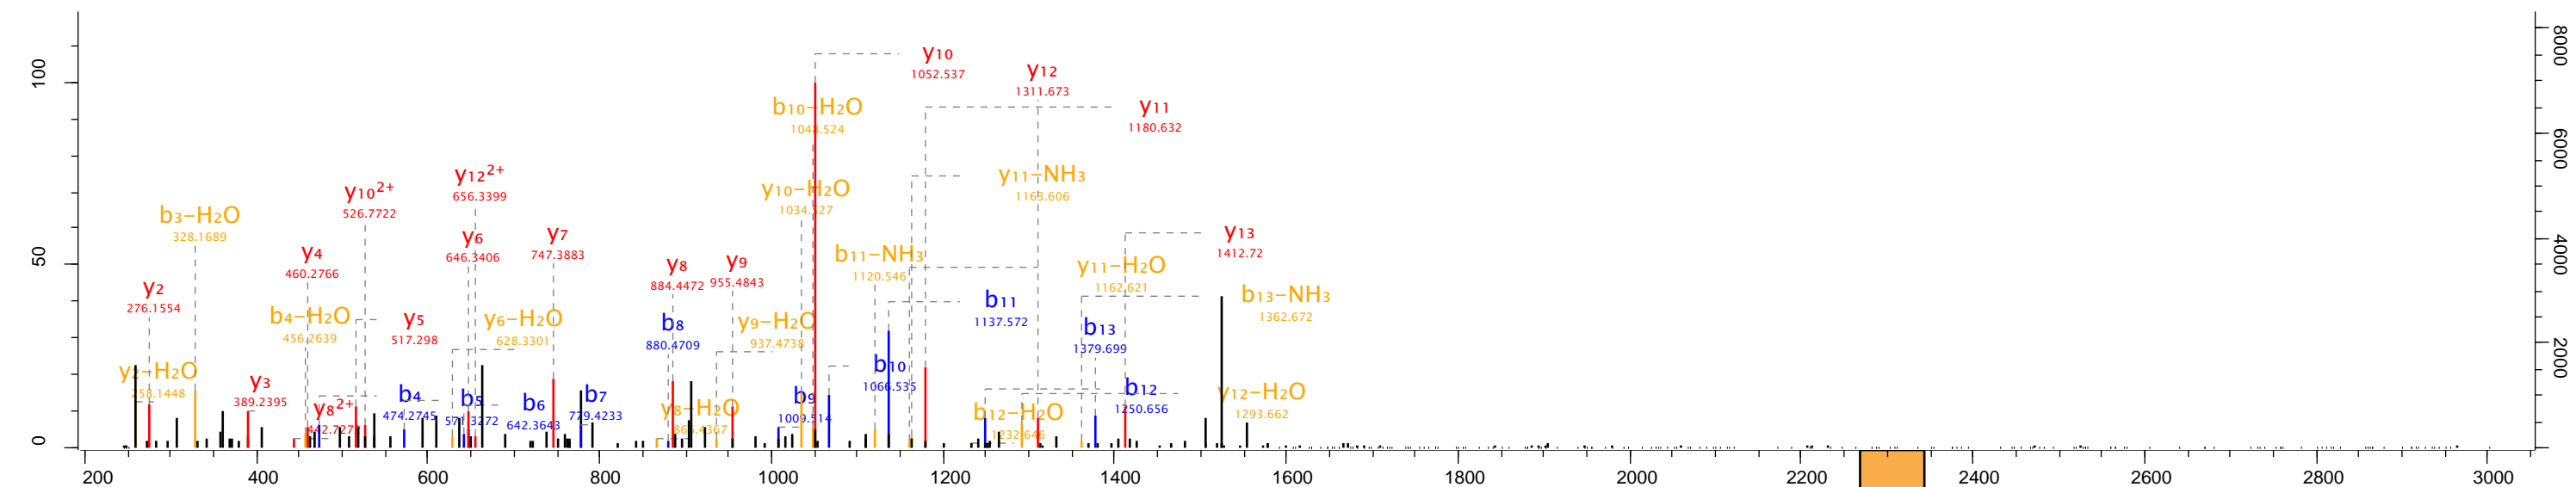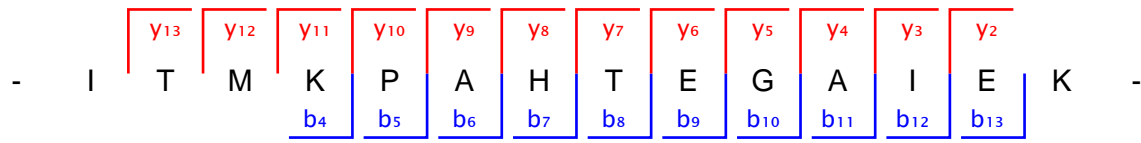

Spectral Annotation for Single-Peptide IDs in 16-cell Embryo using qQ-TOF

Raw file: 2014-10-22\_CL04\_Embx2dil\_4Hz  
 Scan: 4048 Method: TOF; CID Score: 152.16 m/z: 810.44

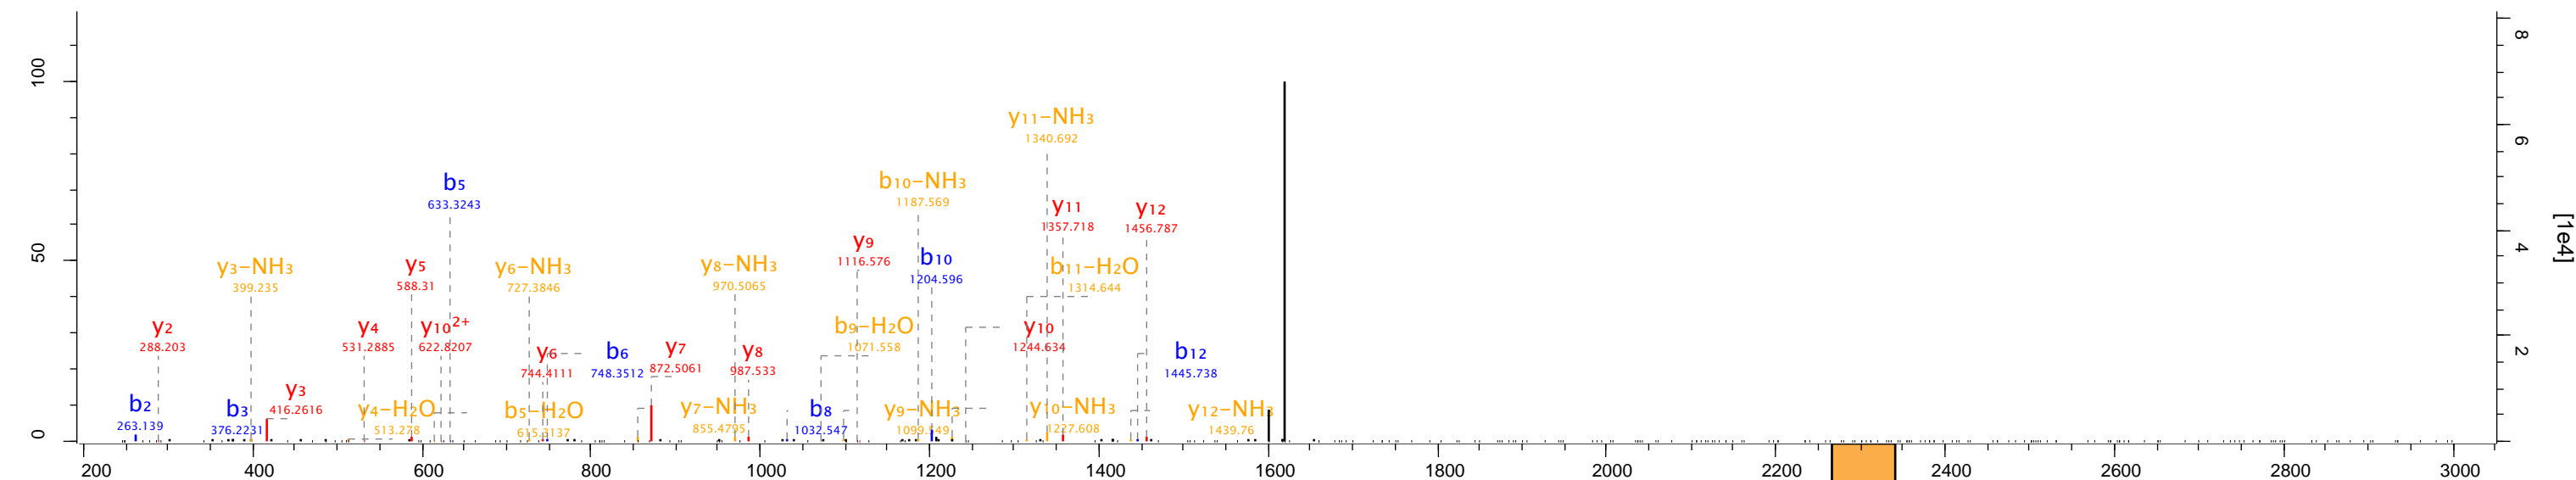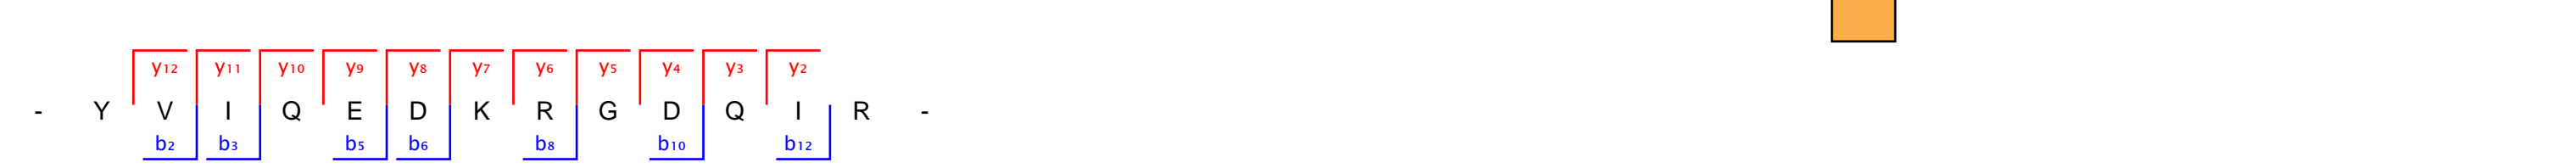

Raw file 2014-10-22\_CL04\_Embx2dil\_4Hz Scan 4183 Method TOF; CID Score 128.91 m/z 551.8

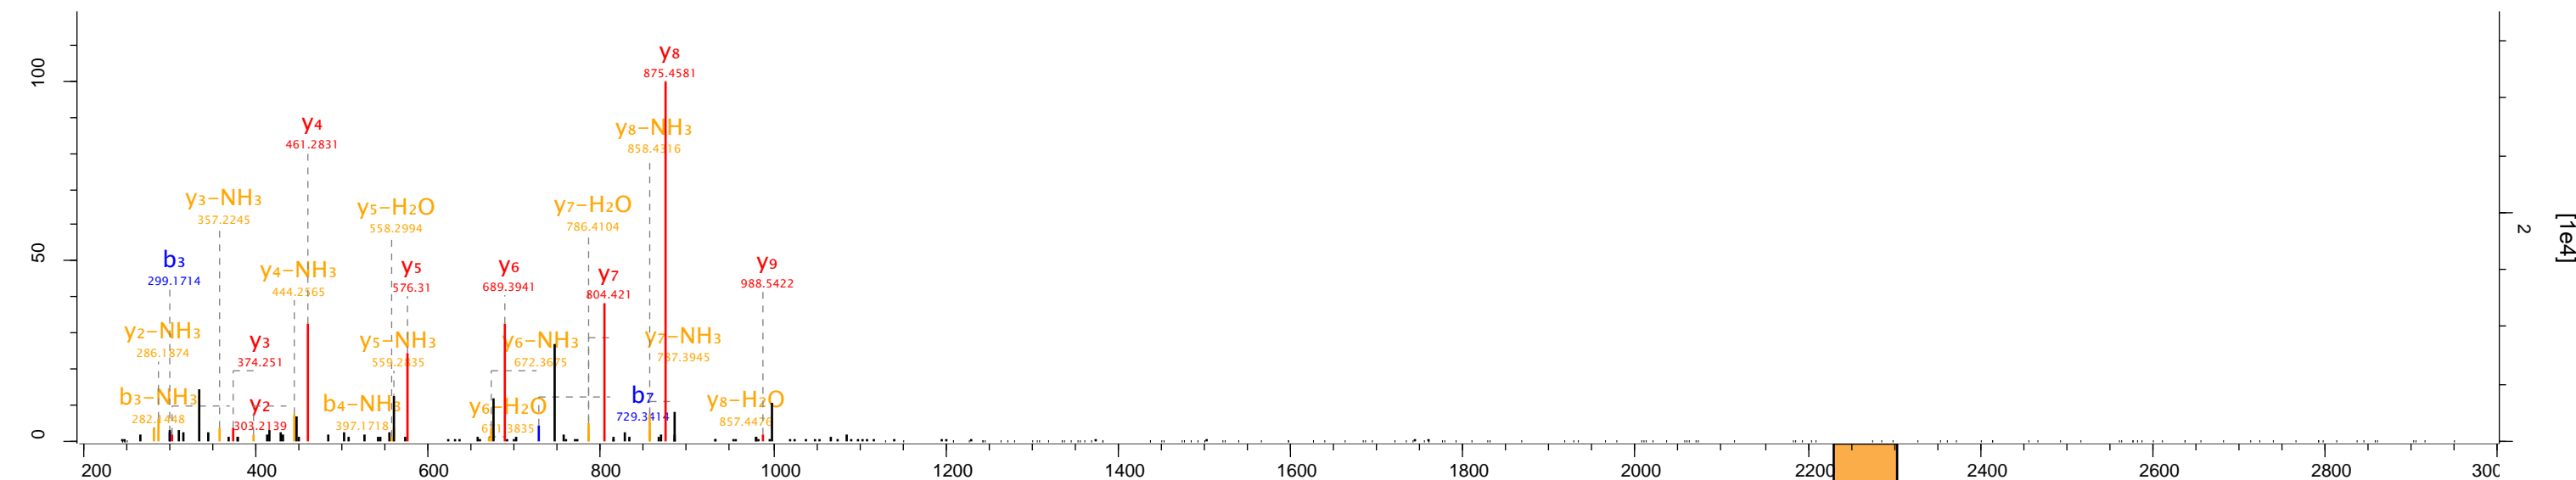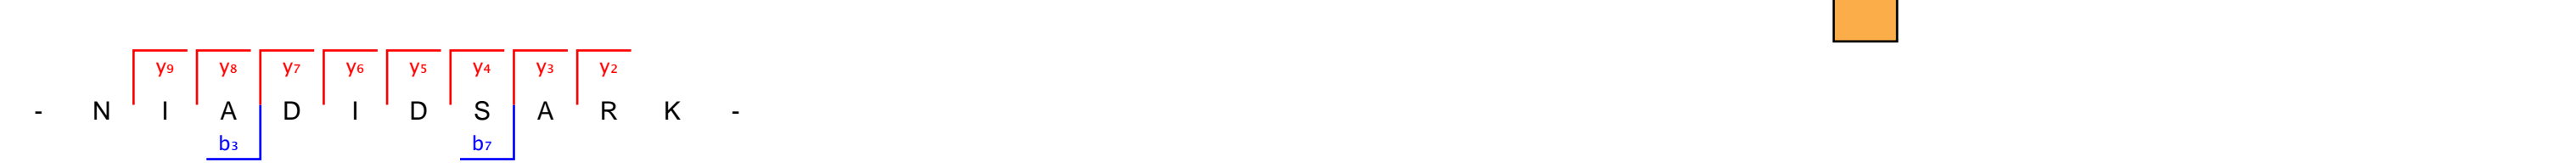

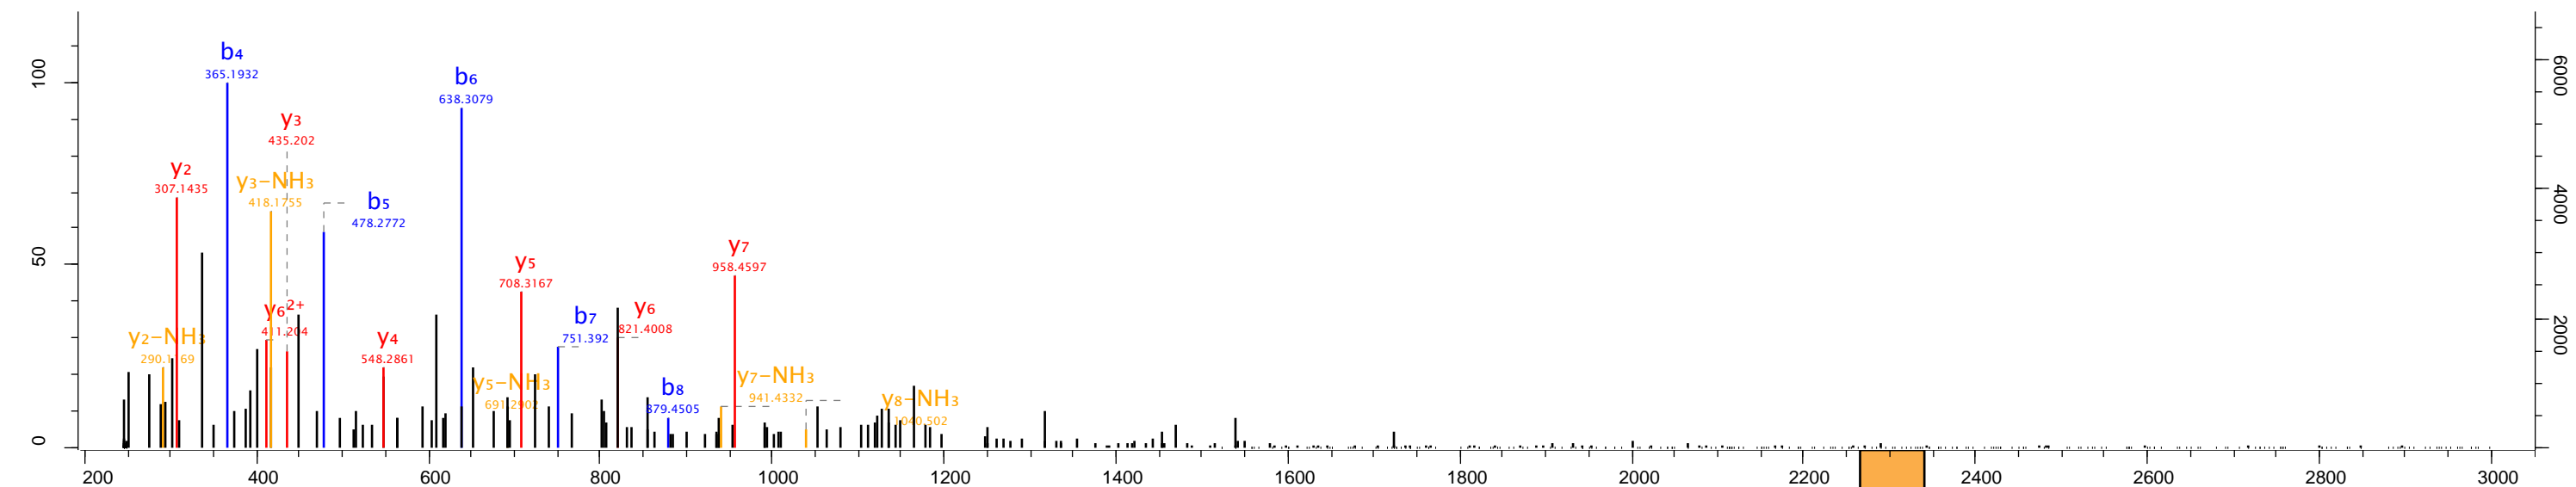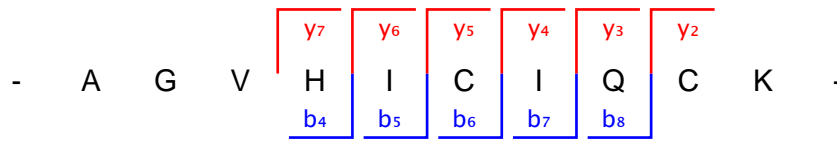

Raw file  
 2014-10-22\_CL04\_Embx2dil\_4Hz  
 Scan 4246 Method TOF; CID Score 37.82 m/z 674.56

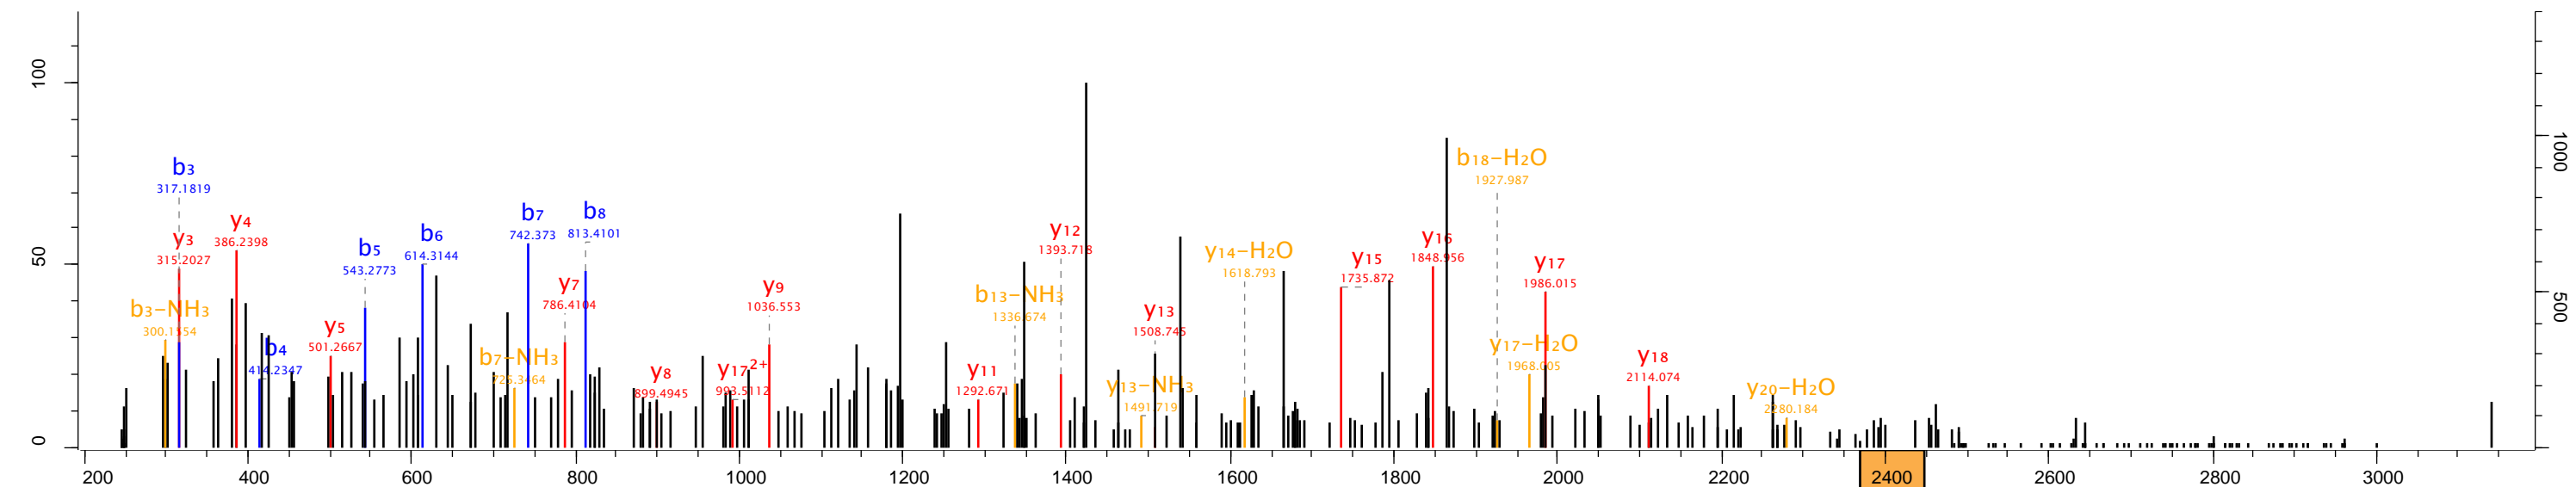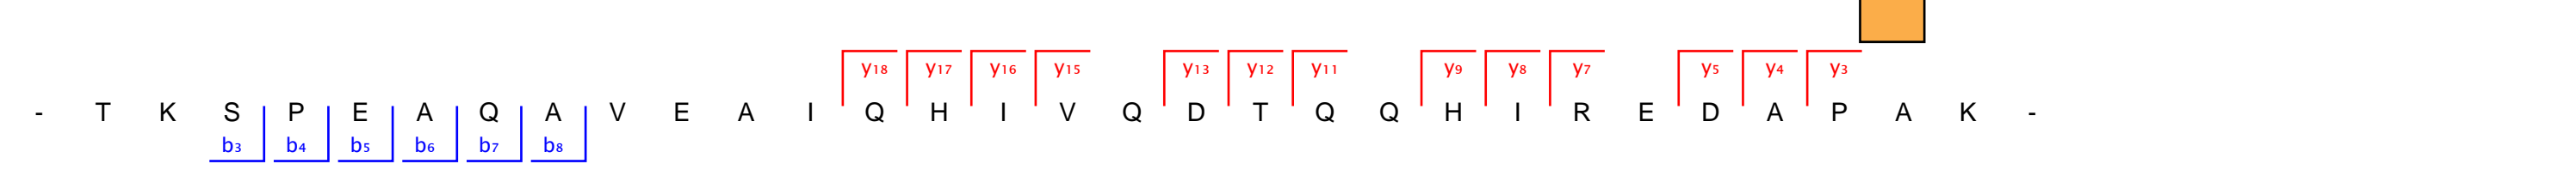

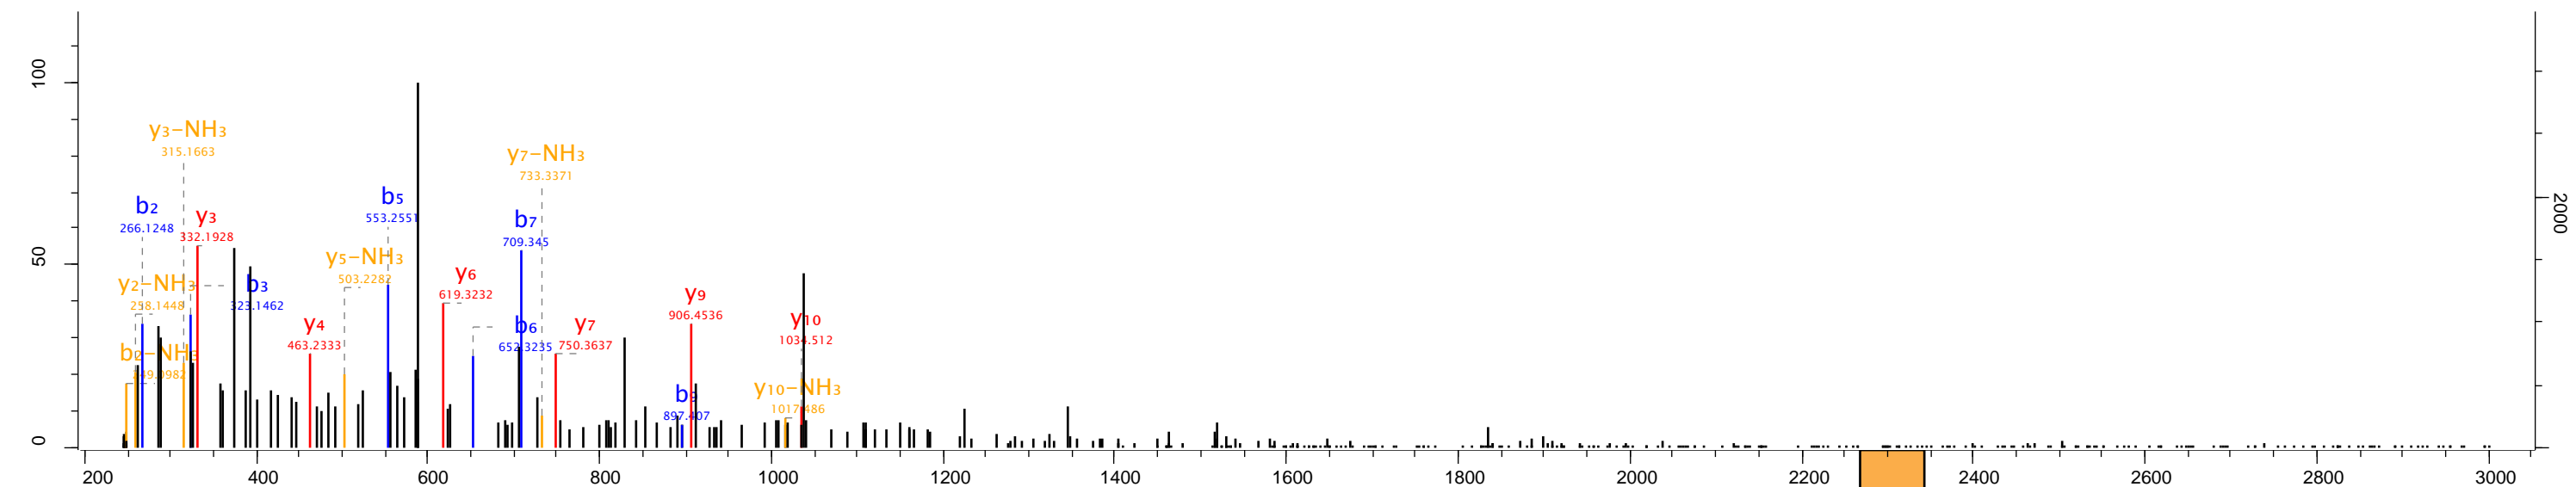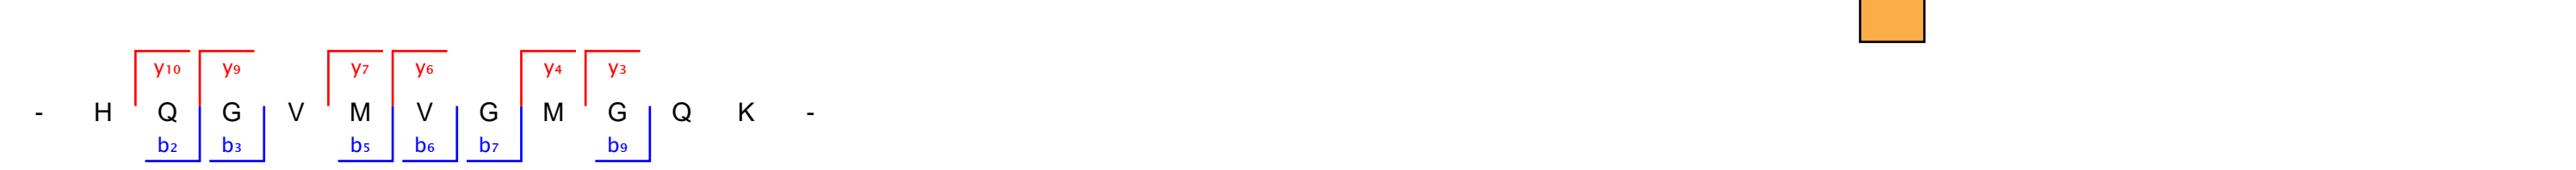

Raw file 2014-10-22\_CL04\_Embx2dil\_4Hz Scan 4291 Method TOF; CID Score 50.08 m/z 592.34

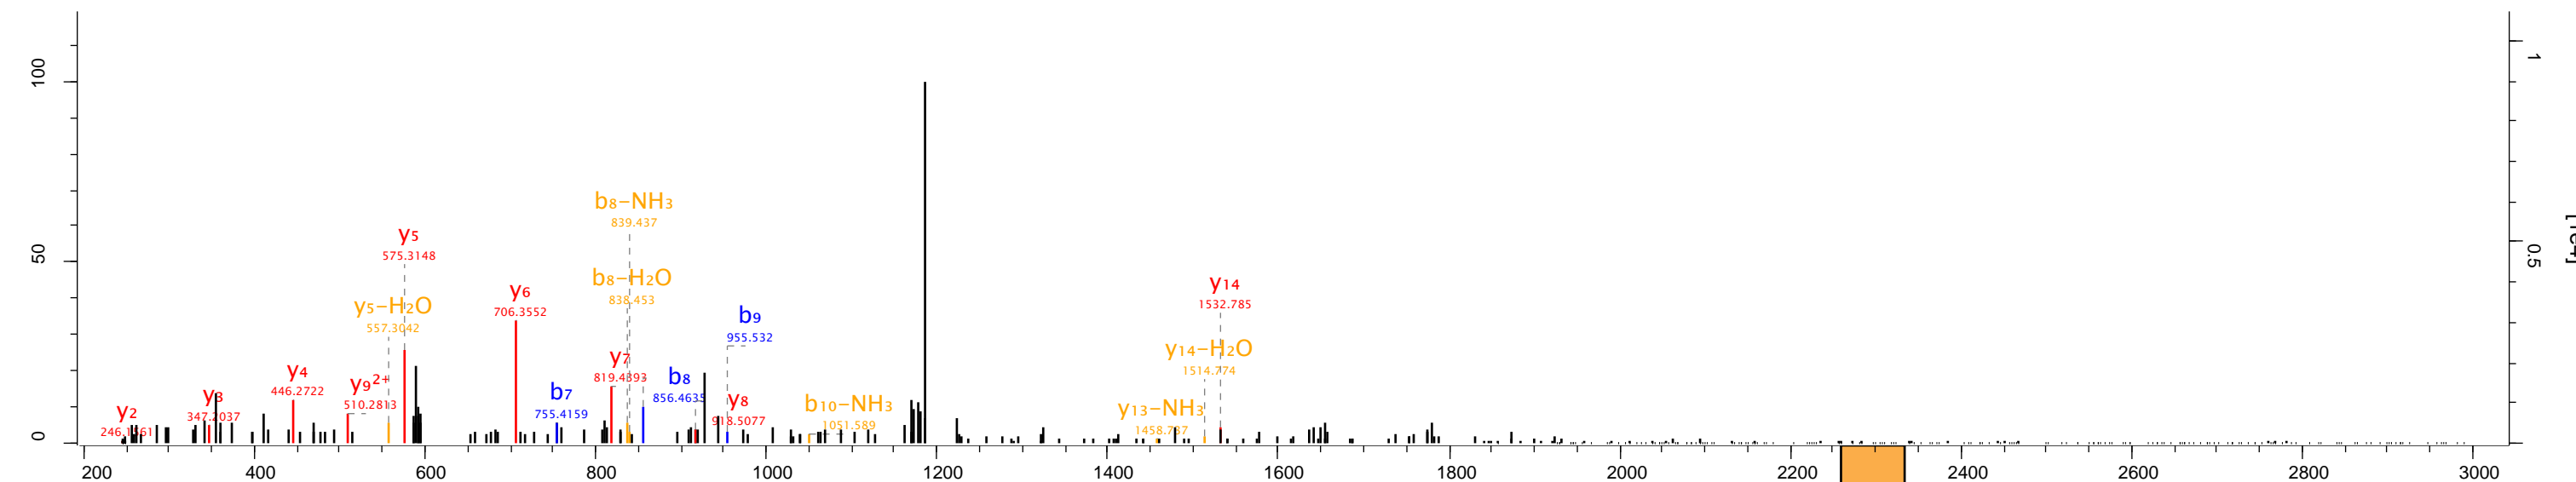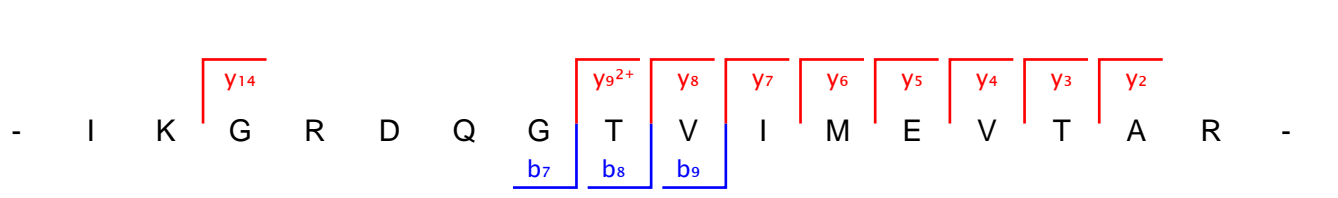

Spectral Annotation for Single-Peptide IDs in 16-cell Embryo using qQ-TOF

Raw file 2014-10-22\_CL04\_Embx2dil\_4Hz Scan 4304 Method TOF; CID Score 175.63 m/z 865.23

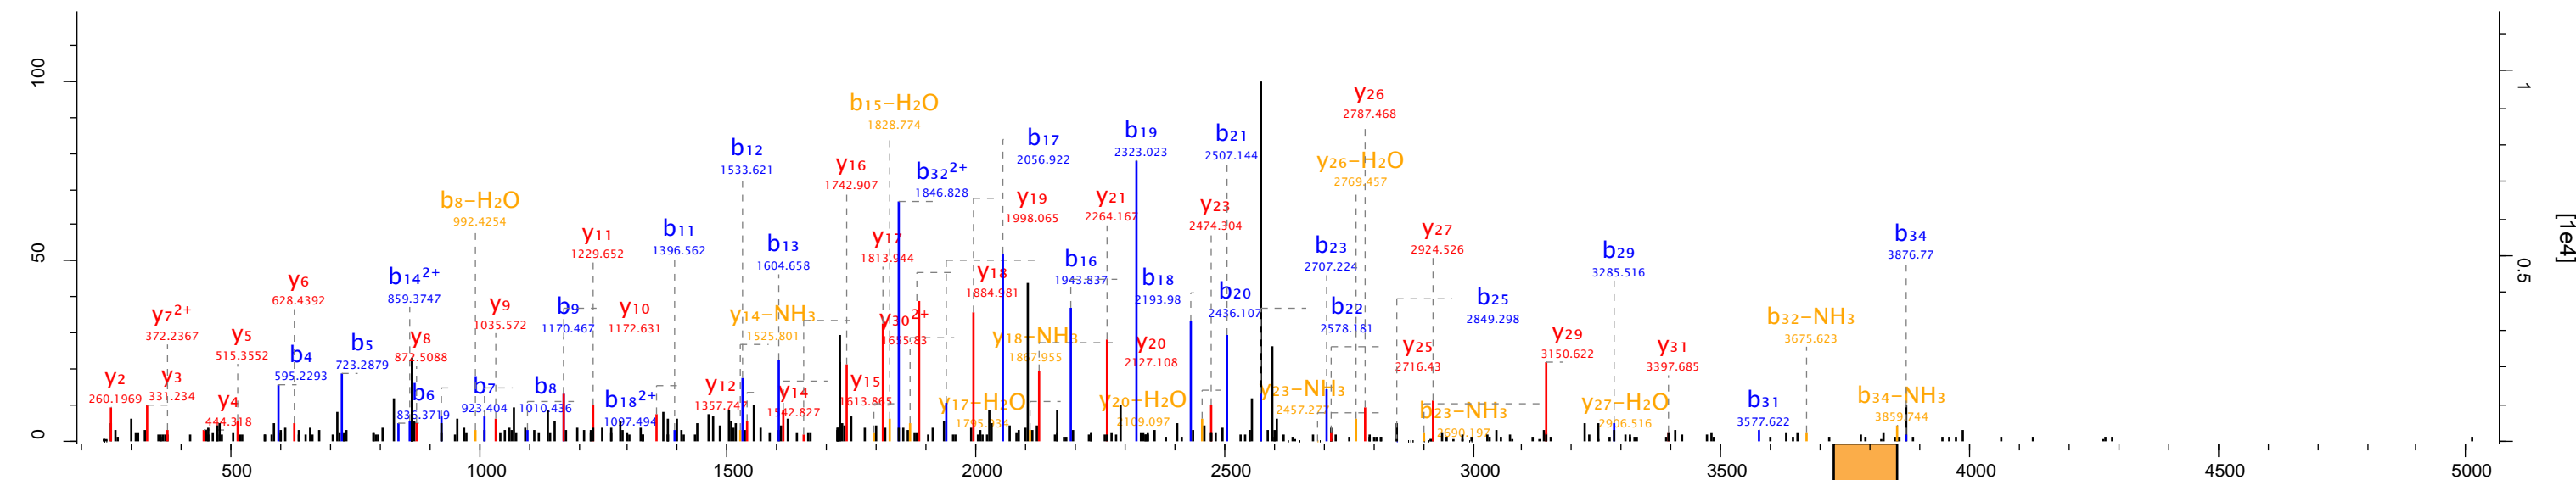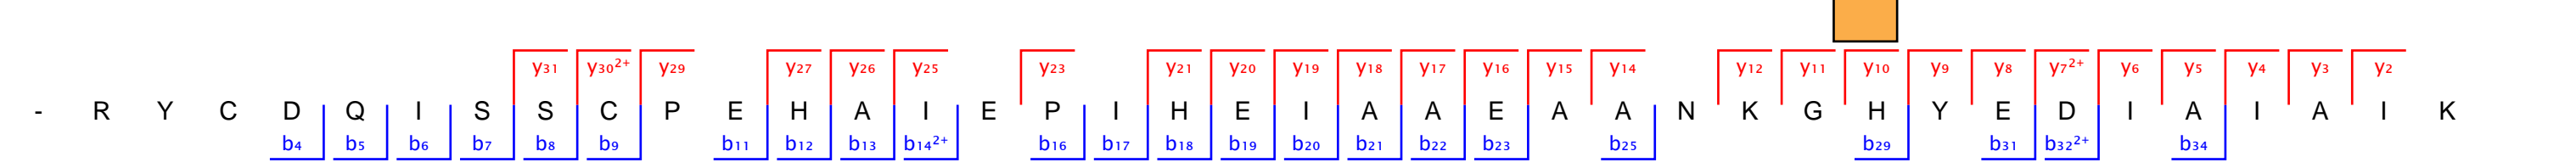

Spectral Annotation for Single-Peptide IDs in 16-cell Embryo using qQ-TOF C. Lombard-Banek, S. Reddy, S. A. Moody, P. Nemes, Mol. Cell. Prot. 2016



Raw file: 2014-10-22\_CL04\_Embx2dil\_4Hz  
 Scan: 4365 Method: TOF; CID Score: 171.05 m/z: 884.75

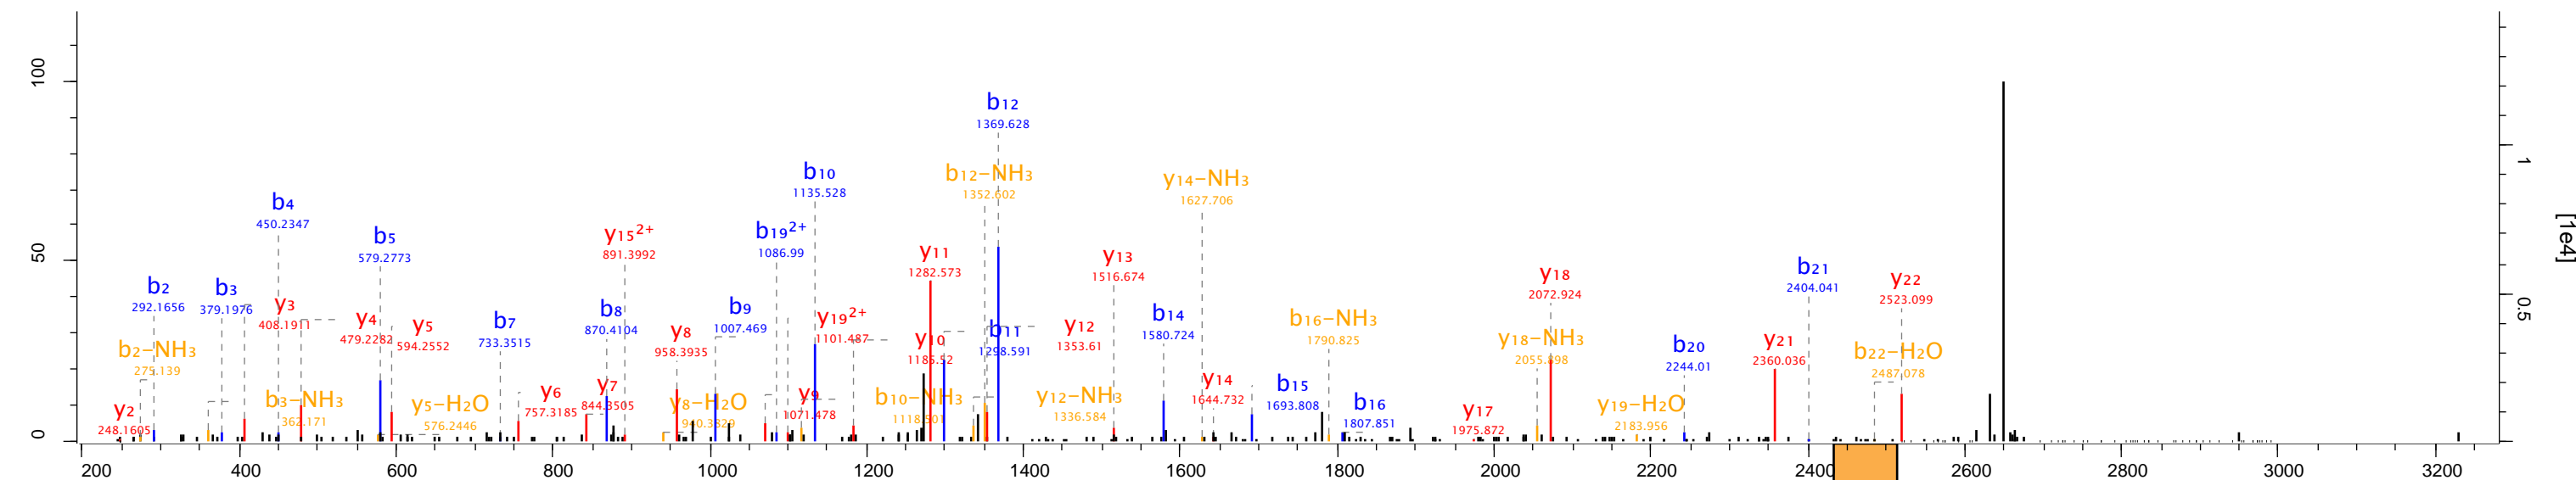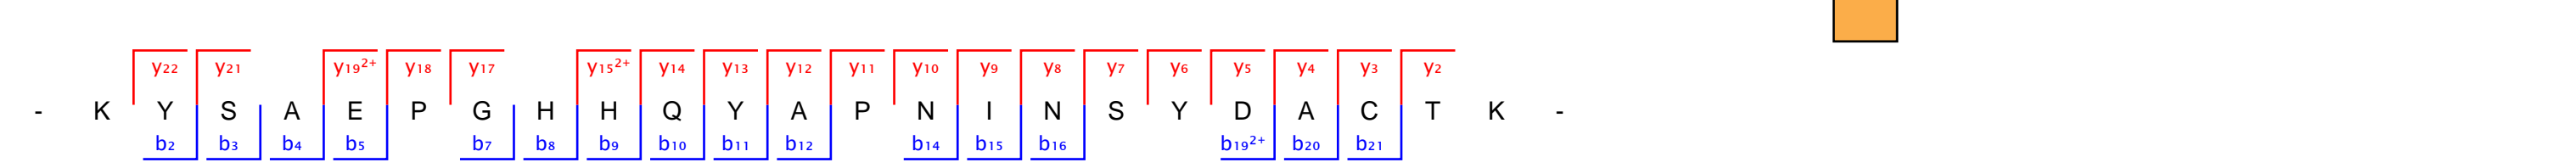

Spectral Annotation for Single-Peptide IDs in 16-cell Embryo using qQ-TOF

Raw file 2014-10-22\_CL04\_Embx2dil\_4Hz Scan 4374 Method TOF; CID Score 104.07 m/z 615.34

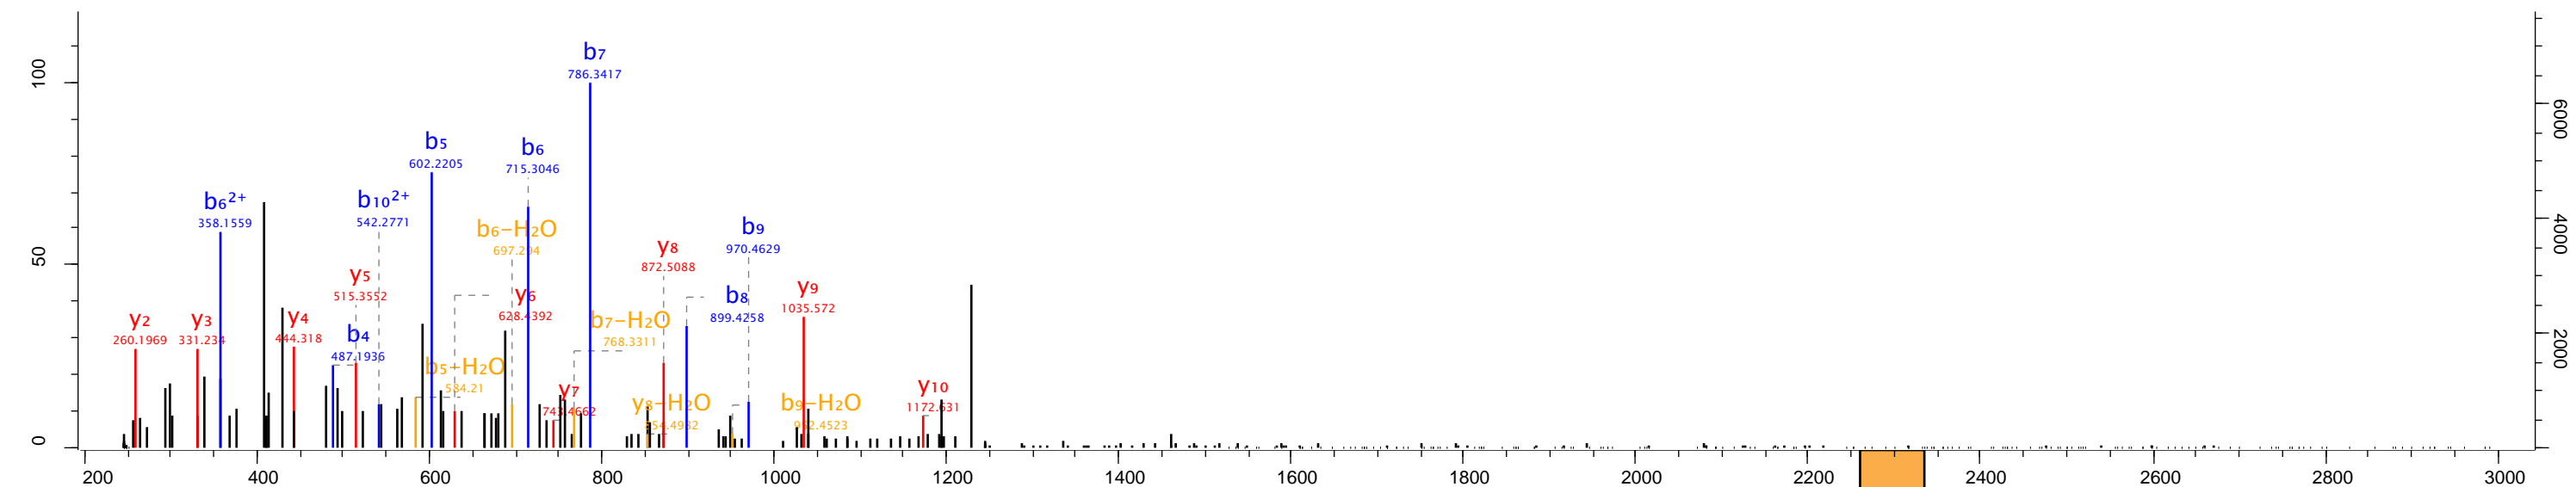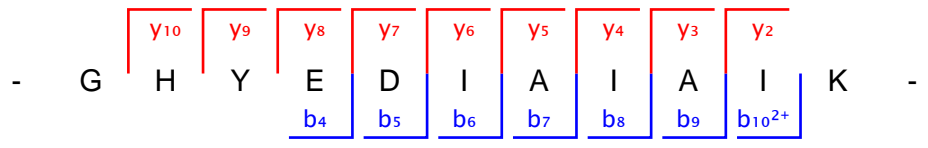

Spectral Annotation for Single-Peptide IDs in 16-cell Embryo using qQ-TOF

Raw file 2014-10-22\_CL04\_Embx2dil\_4Hz Scan 4463 Method TOF; CID Score 100.93 m/z 670.45

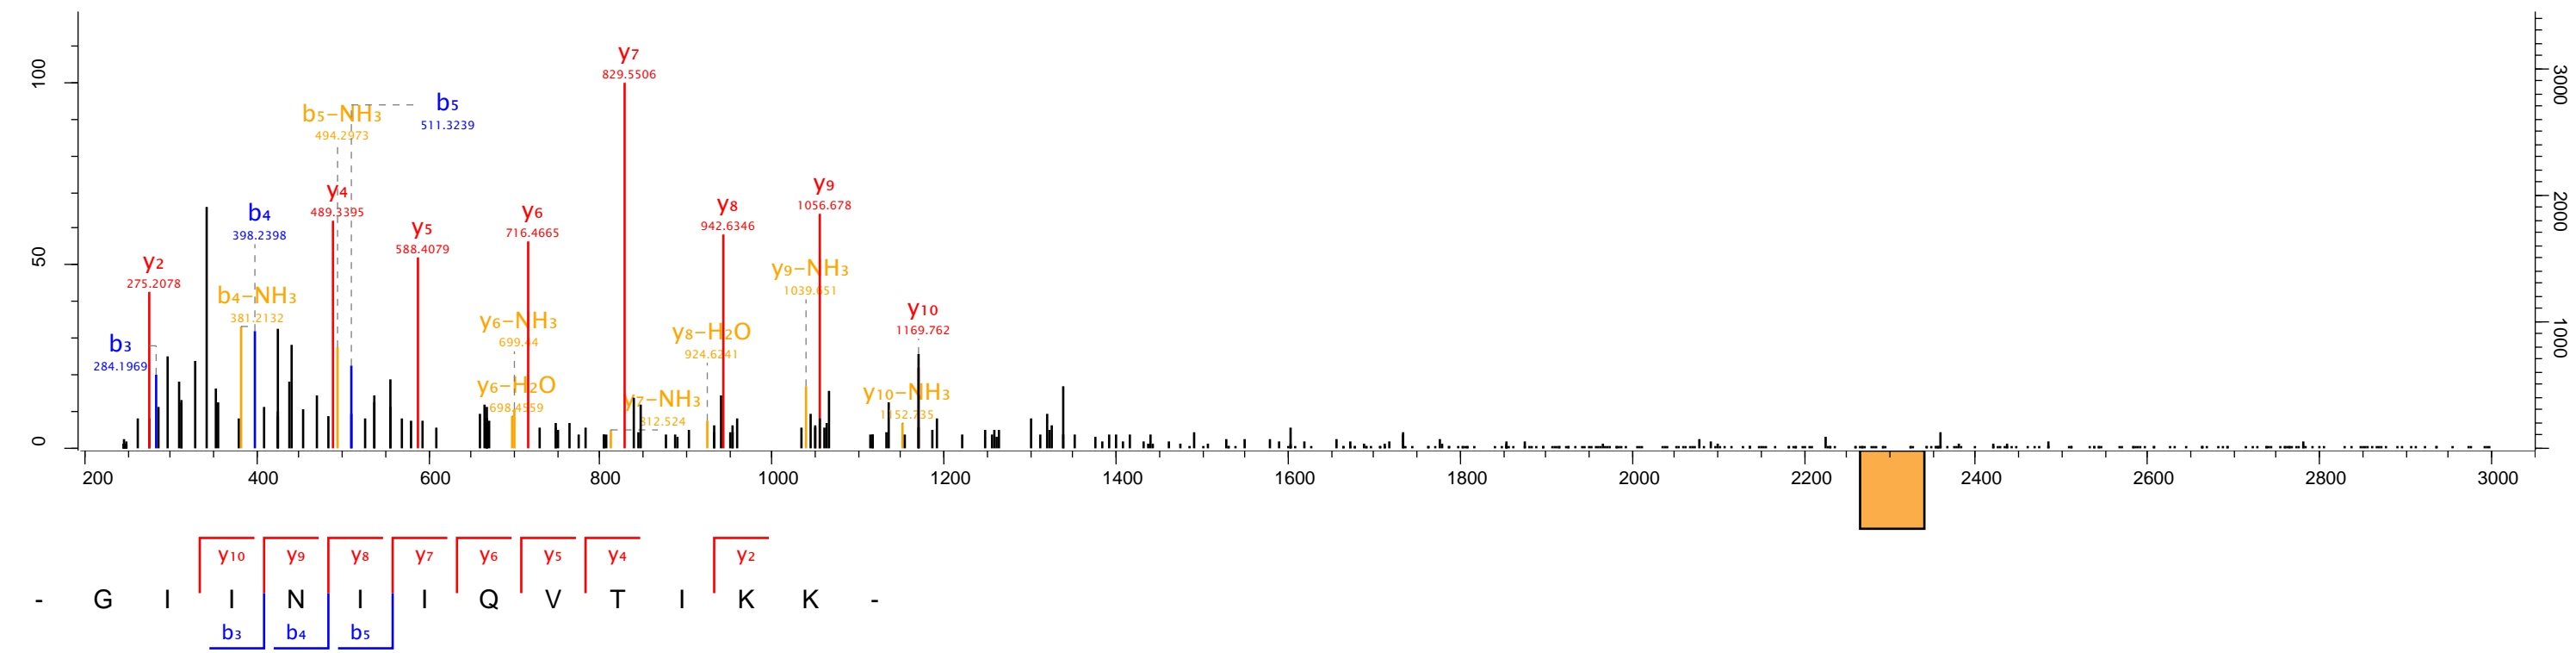

Spectral Annotation for Single-Peptide IDs in 16-cell Embryo using qQ-TOF

Raw file Scan Method Score m/z  
 2014-10-22\_CL04\_Embx2dil\_4Hz 4581 TOF; CID 41.65 778.38

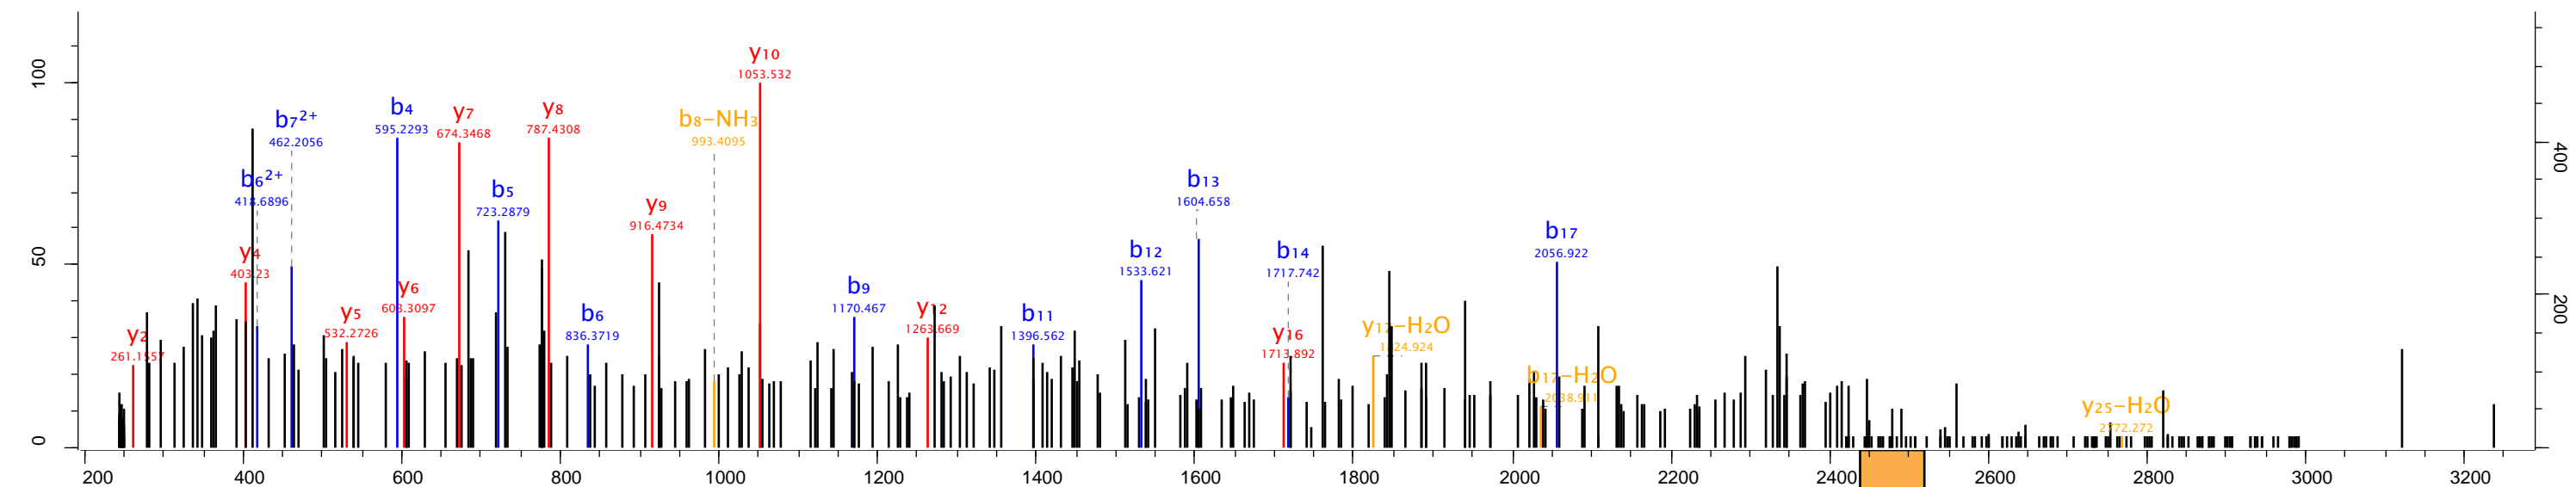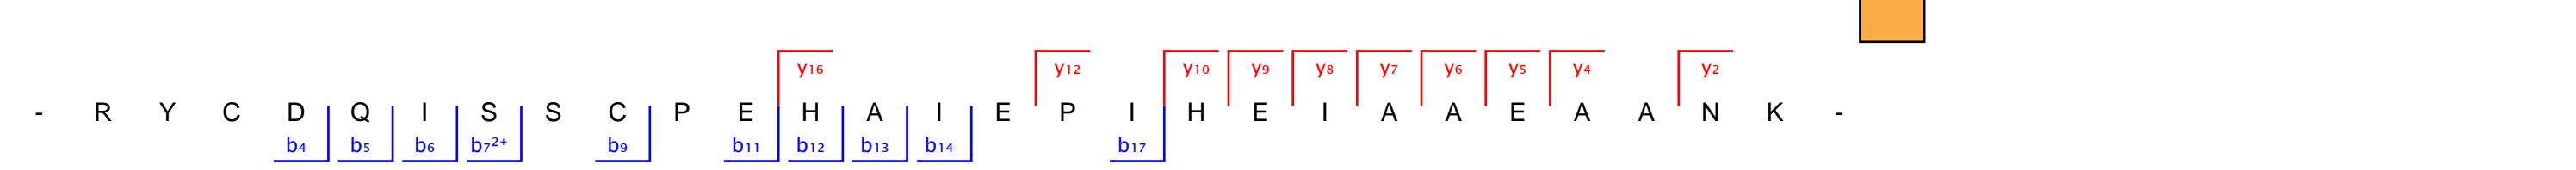

Spectral Annotation for Single-Peptide IDs in 16-cell Embryo using qQ-TOF

Raw file: 2014-10-22\_CL04\_Embx2dil\_4Hz  
 Scan: 4587 Method: TOF; CID Score: 54.54 m/z: 686.44

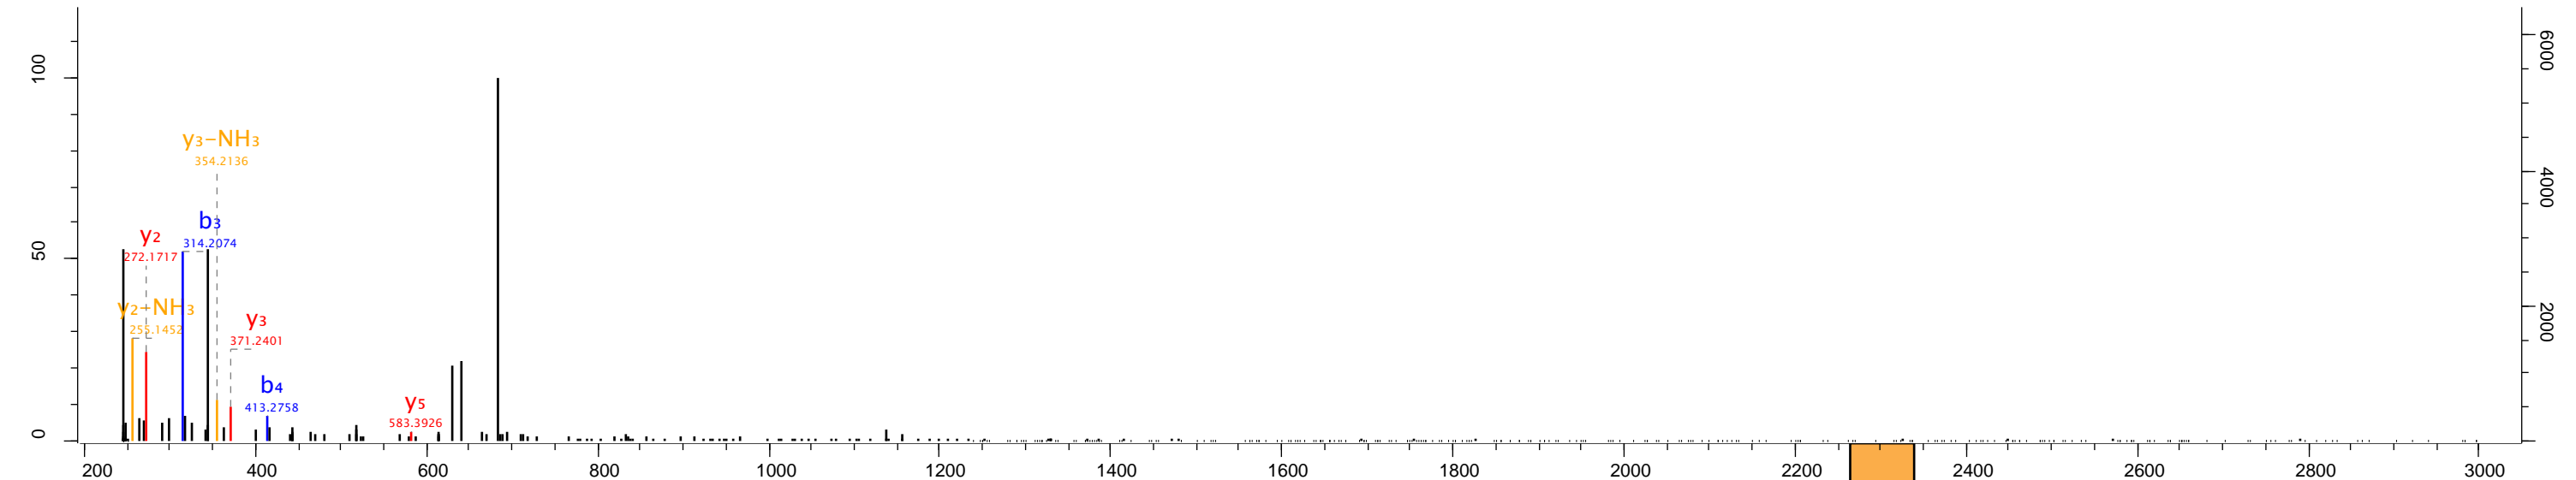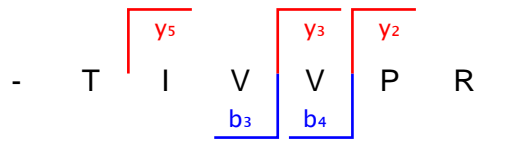

Raw file 2014-10-22\_CL04\_Embx2dil\_4Hz Scan 4627 Method TOF; CID Score 188.19 m/z 780.75

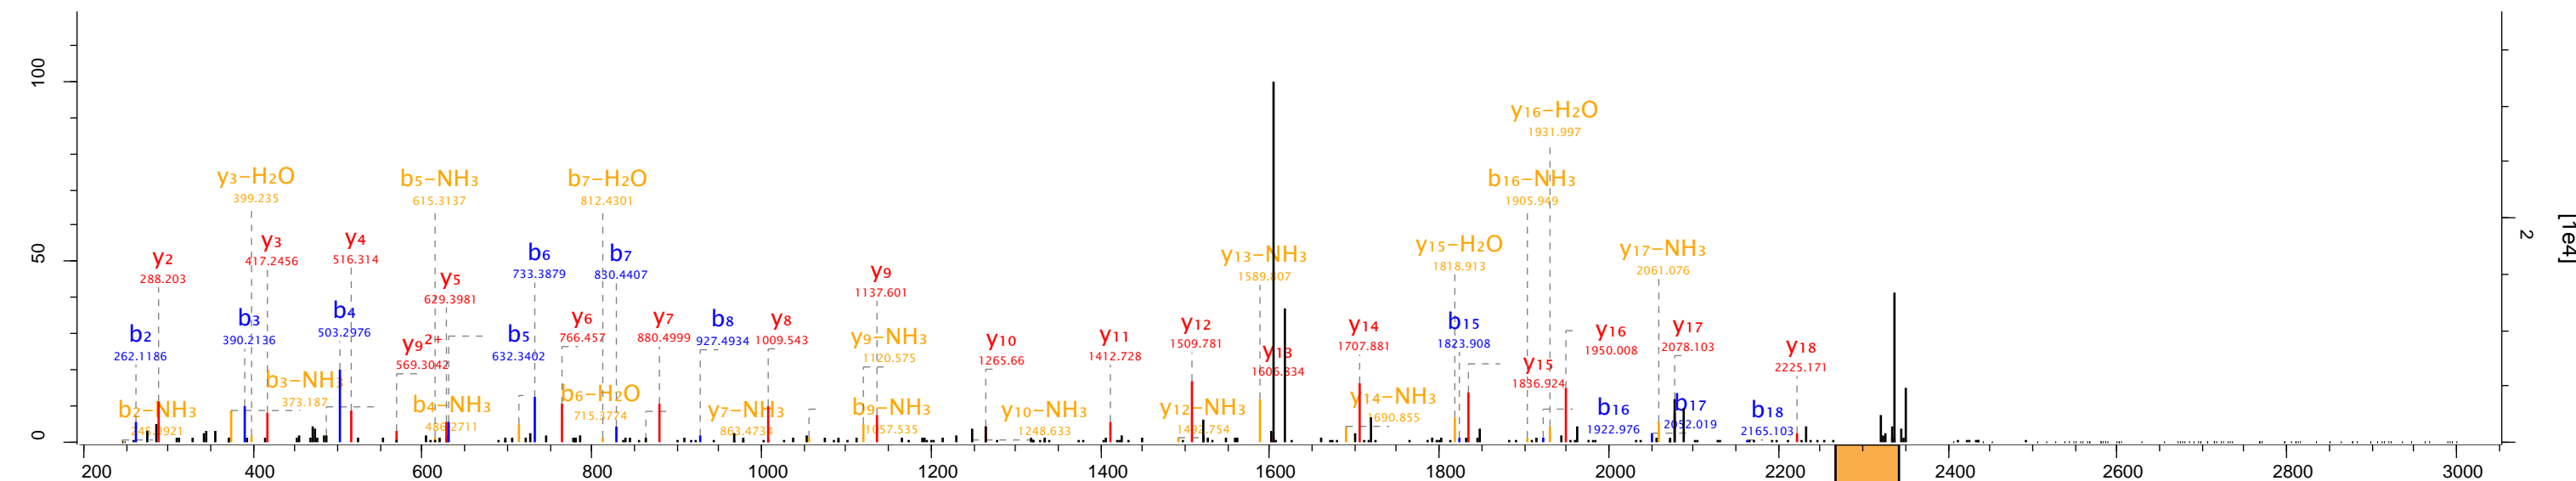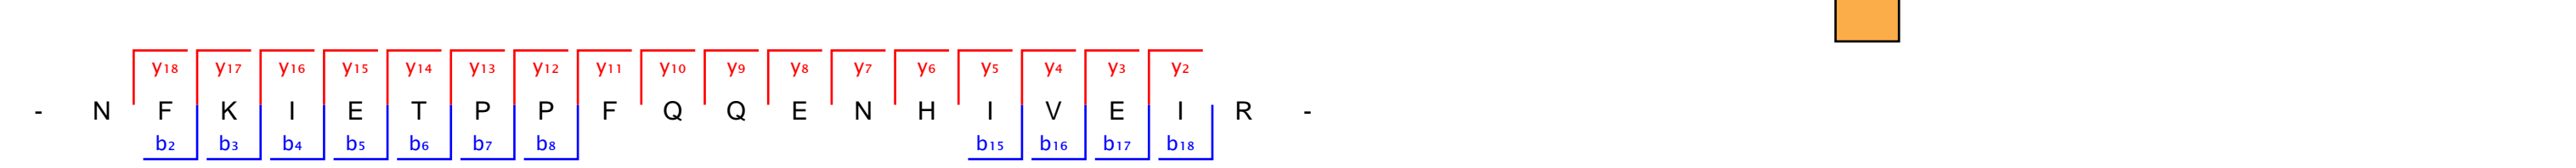

Spectral Annotation for Single-Peptide IDs in 16-cell Embryo using qQ-TOF

Raw file: 2014-10-22\_CL04\_Embx2dil\_4Hz  
 Scan: 4628 Method: TOF; CID Score: 109.62 m/z: 834.01

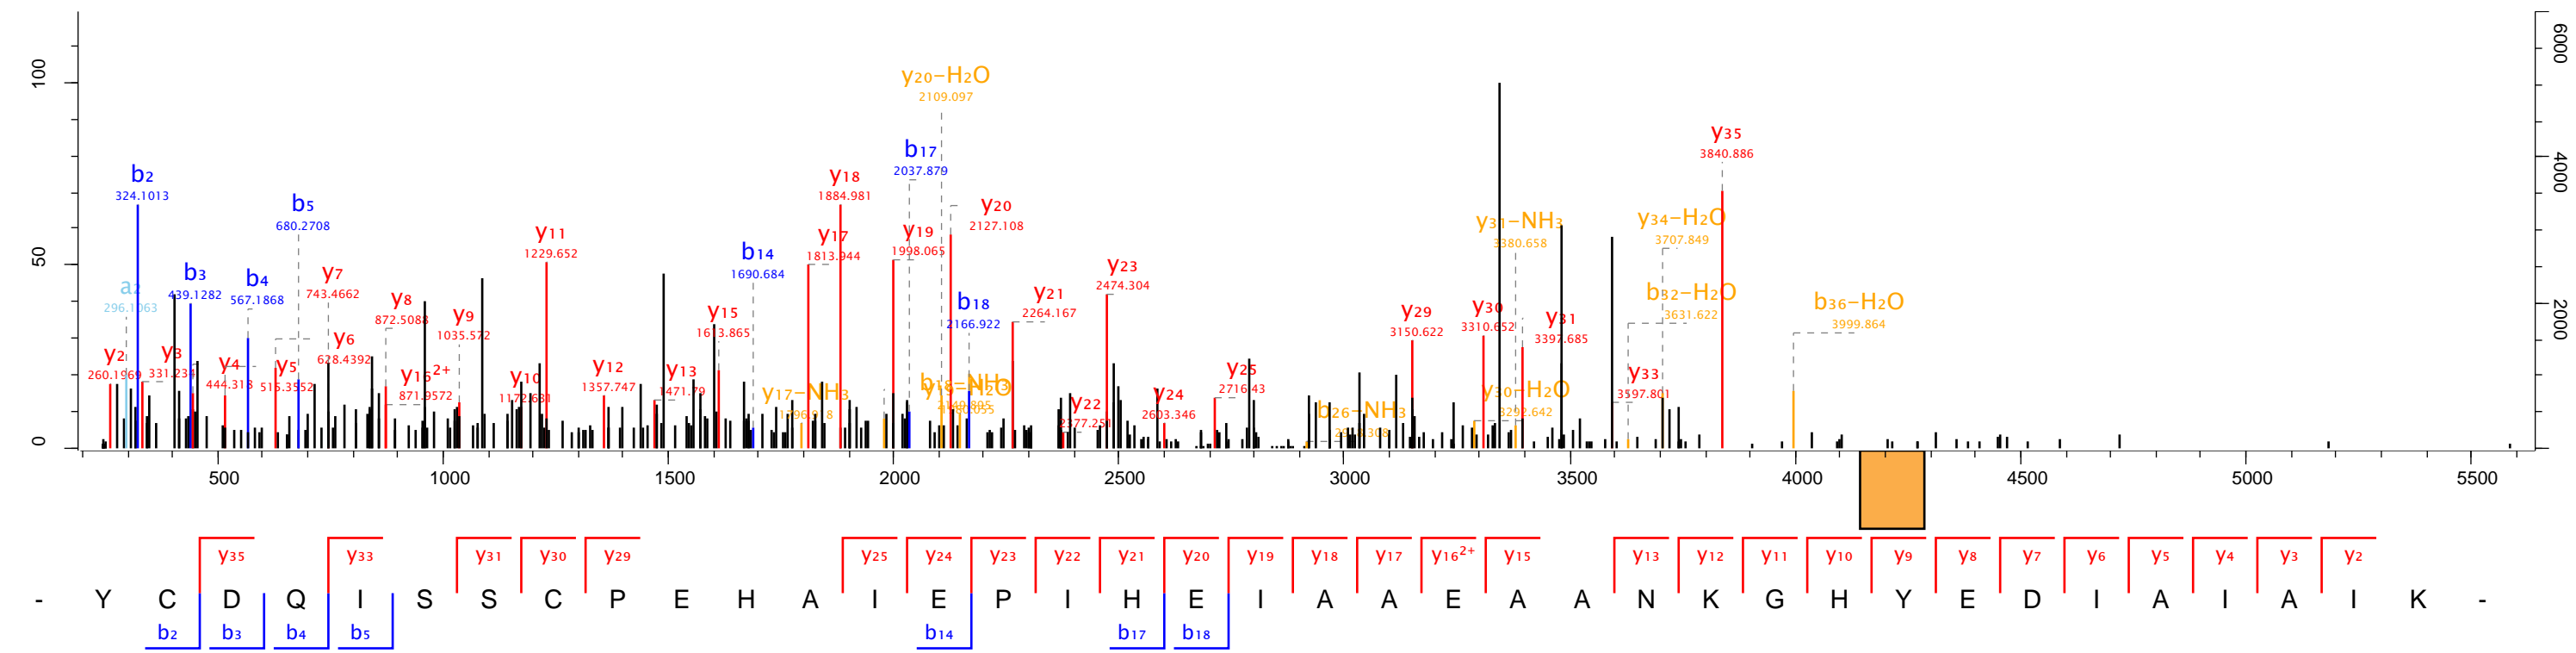

Spectral Annotation for Single-Peptide IDs in 16-cell Embryo using qQ-TOF

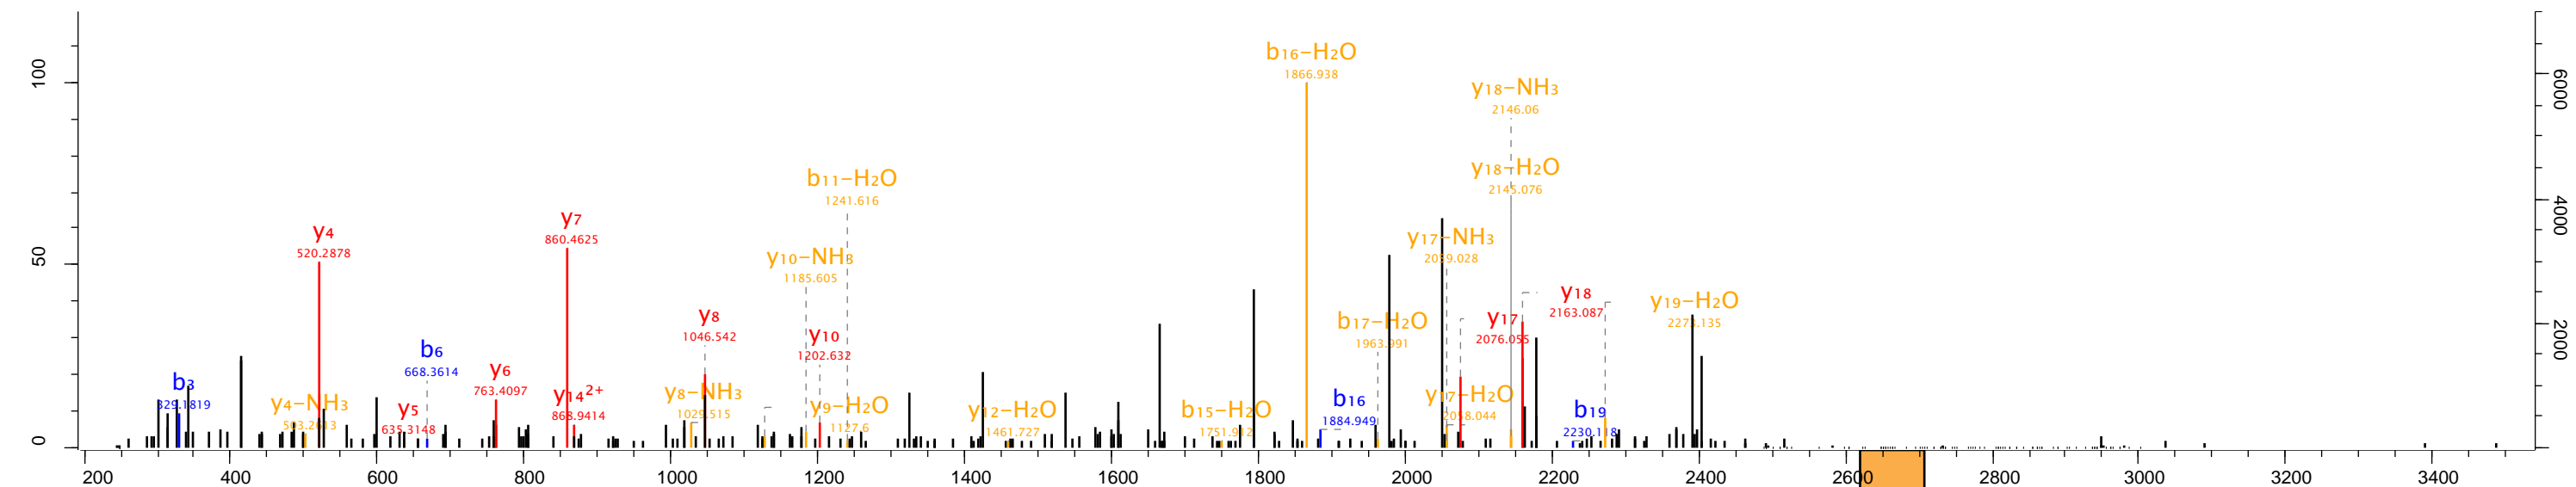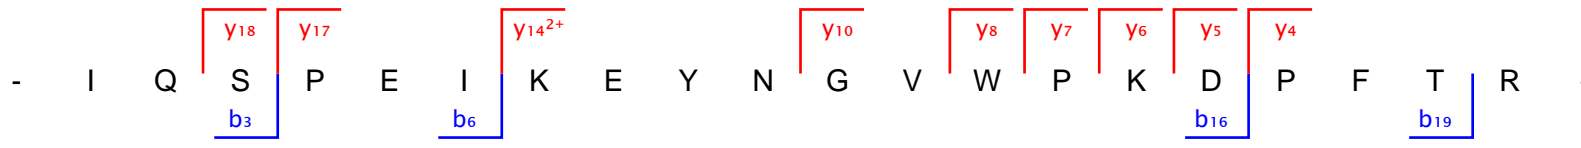



Raw file: 2014-10-22\_CL04\_Embx2dil\_4Hz  
 Scan: 4741  
 Method: TOF; CID  
 Score: 151.74  
 m/z: 513.97

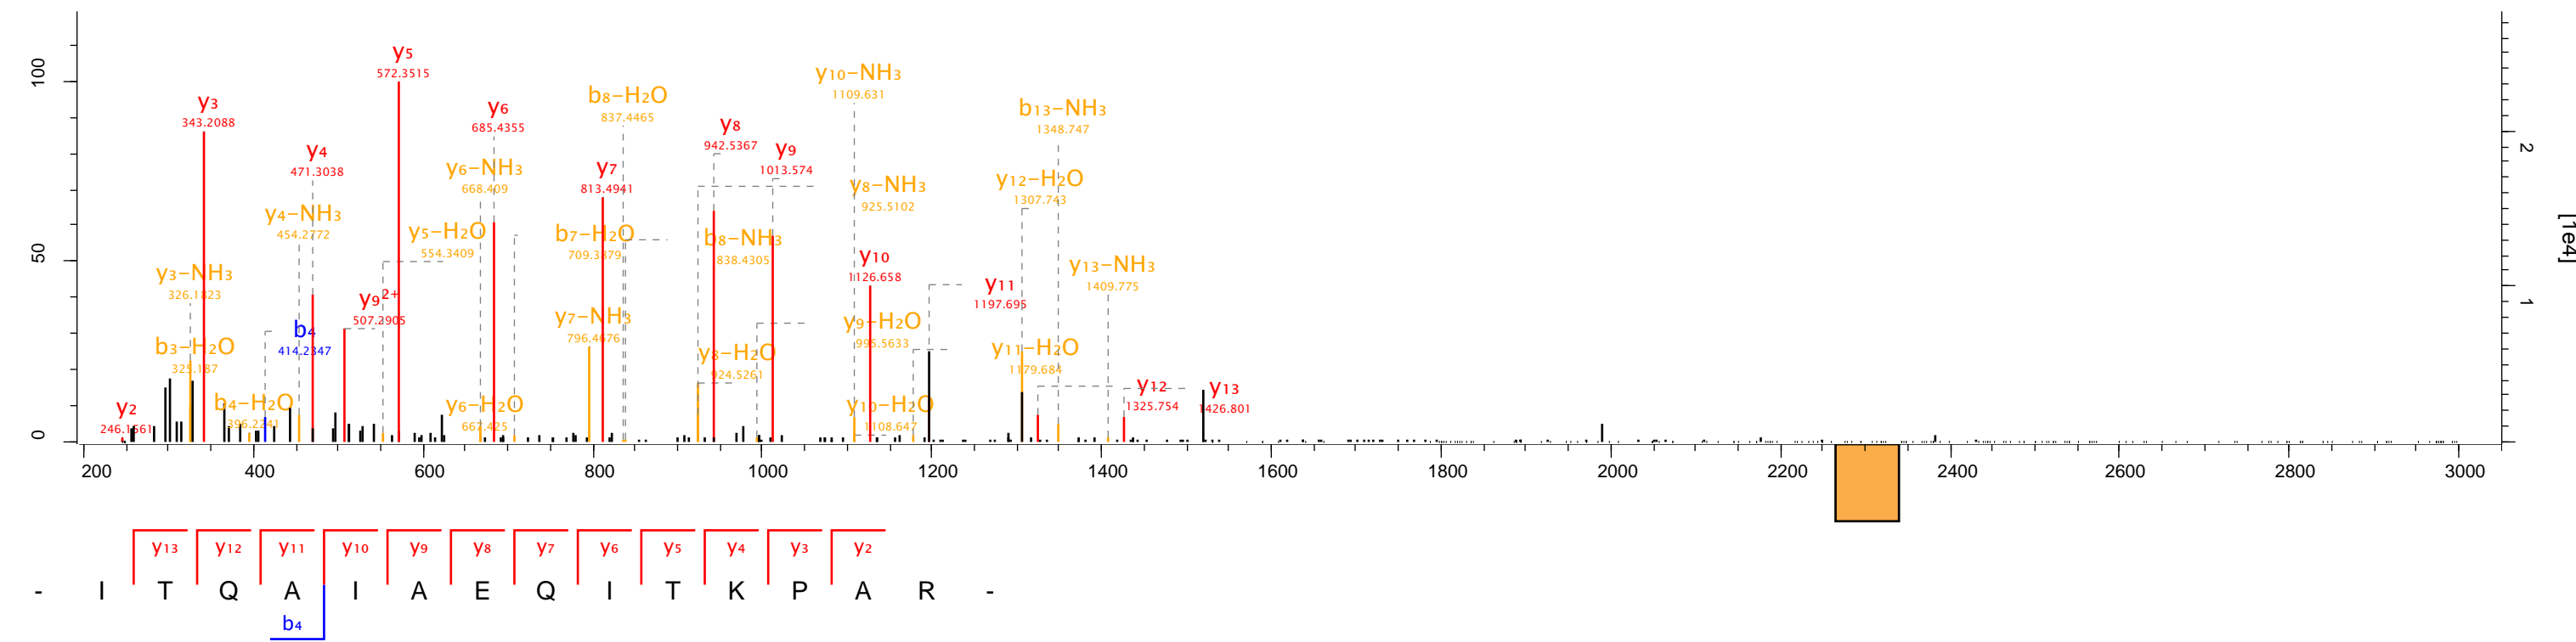

Spectral Annotation for Single-Peptide IDs in 16-cell Embryo using qQ-TOF

Raw file 2014-10-22\_CL04\_Embx2dil\_4Hz Scan 4748 Method TOF; CID Score 167.32 m/z 832.9

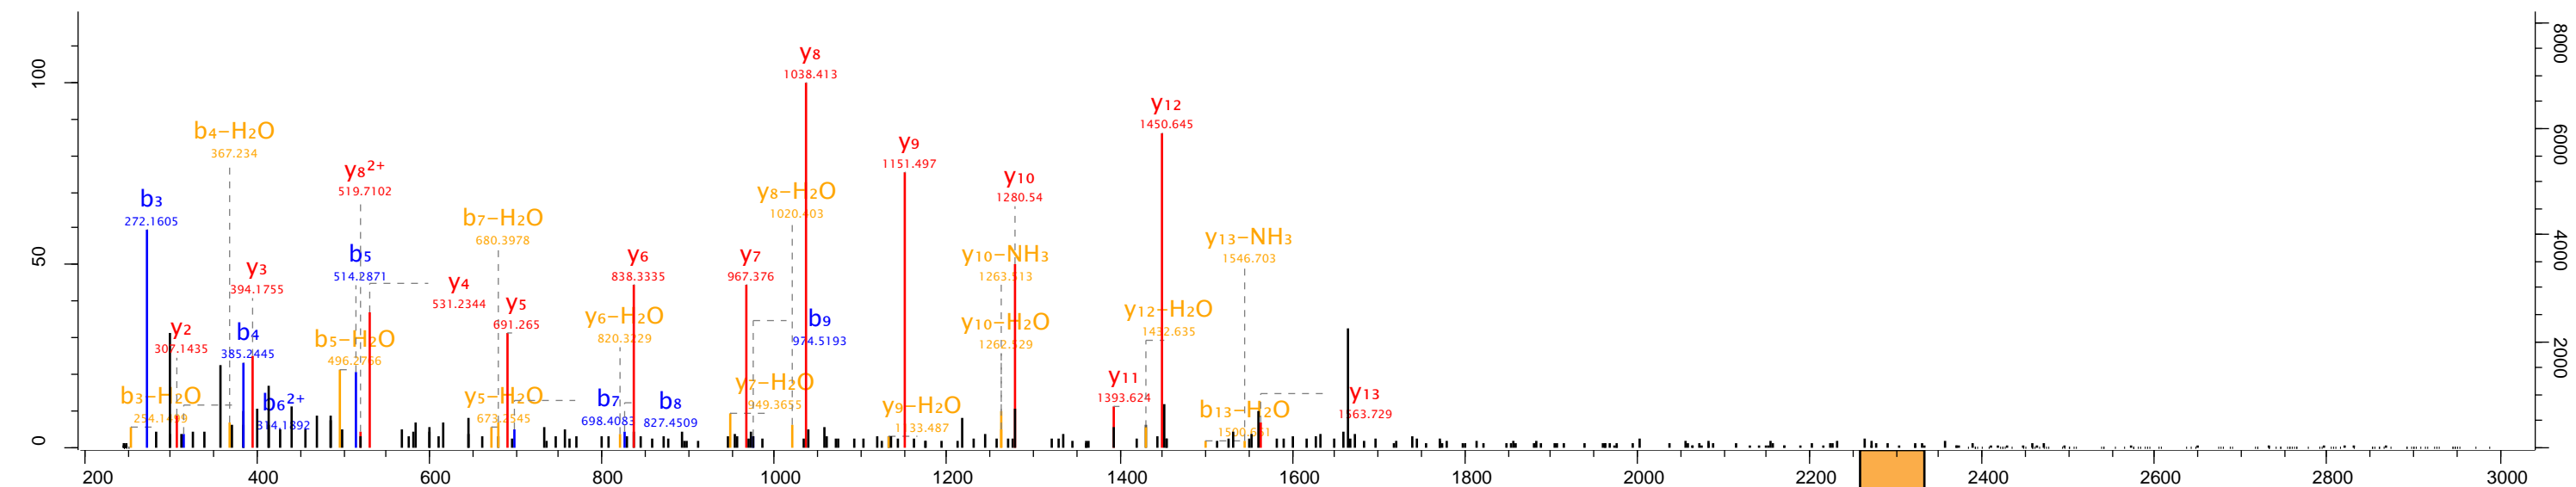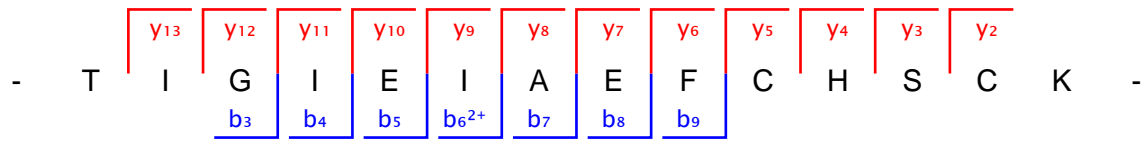

Spectral Annotation for Single-Peptide IDs in 16-cell Embryo using qQ-TOF

Raw file 2014-10-22\_CL04\_Embx2dil\_4Hz Scan 4815 Method TOF; CID Score 144.38 m/z 834.92

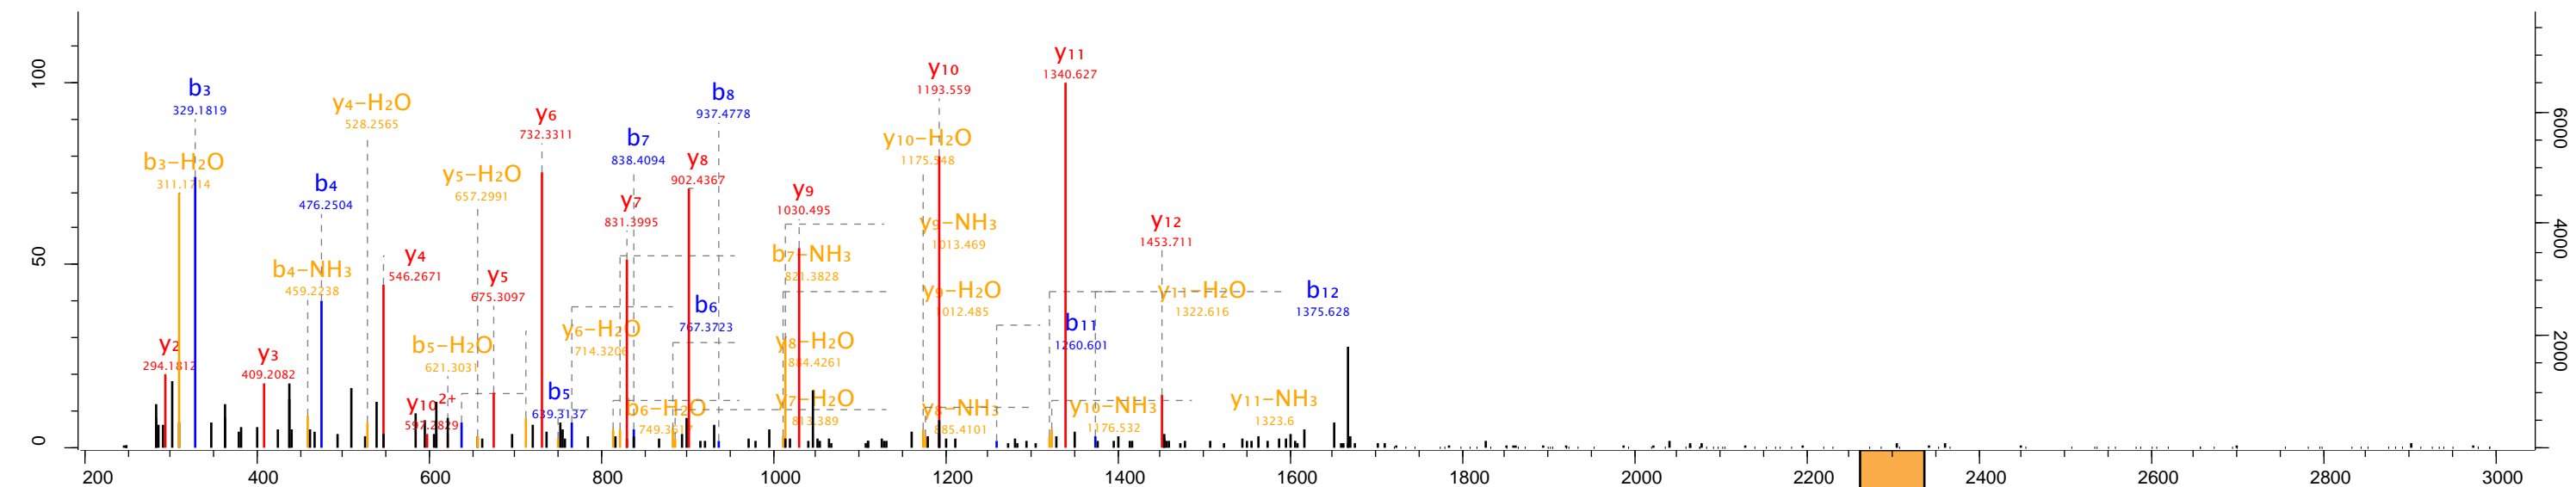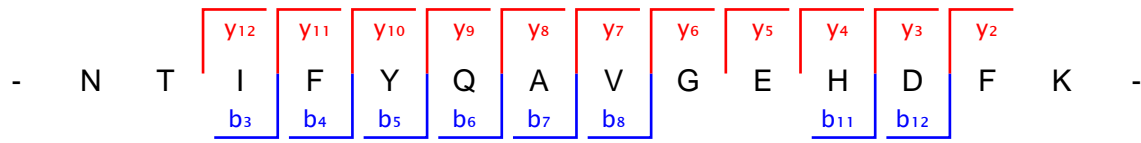

Spectral Annotation for Single-Peptide IDs in 16-cell Embryo using qQ-TOF

Raw file: 2014-10-22\_CL04\_Embx2dil\_4Hz  
 Scan: 4841 Method: TOF; CID Score: 94.12 m/z: 565.61

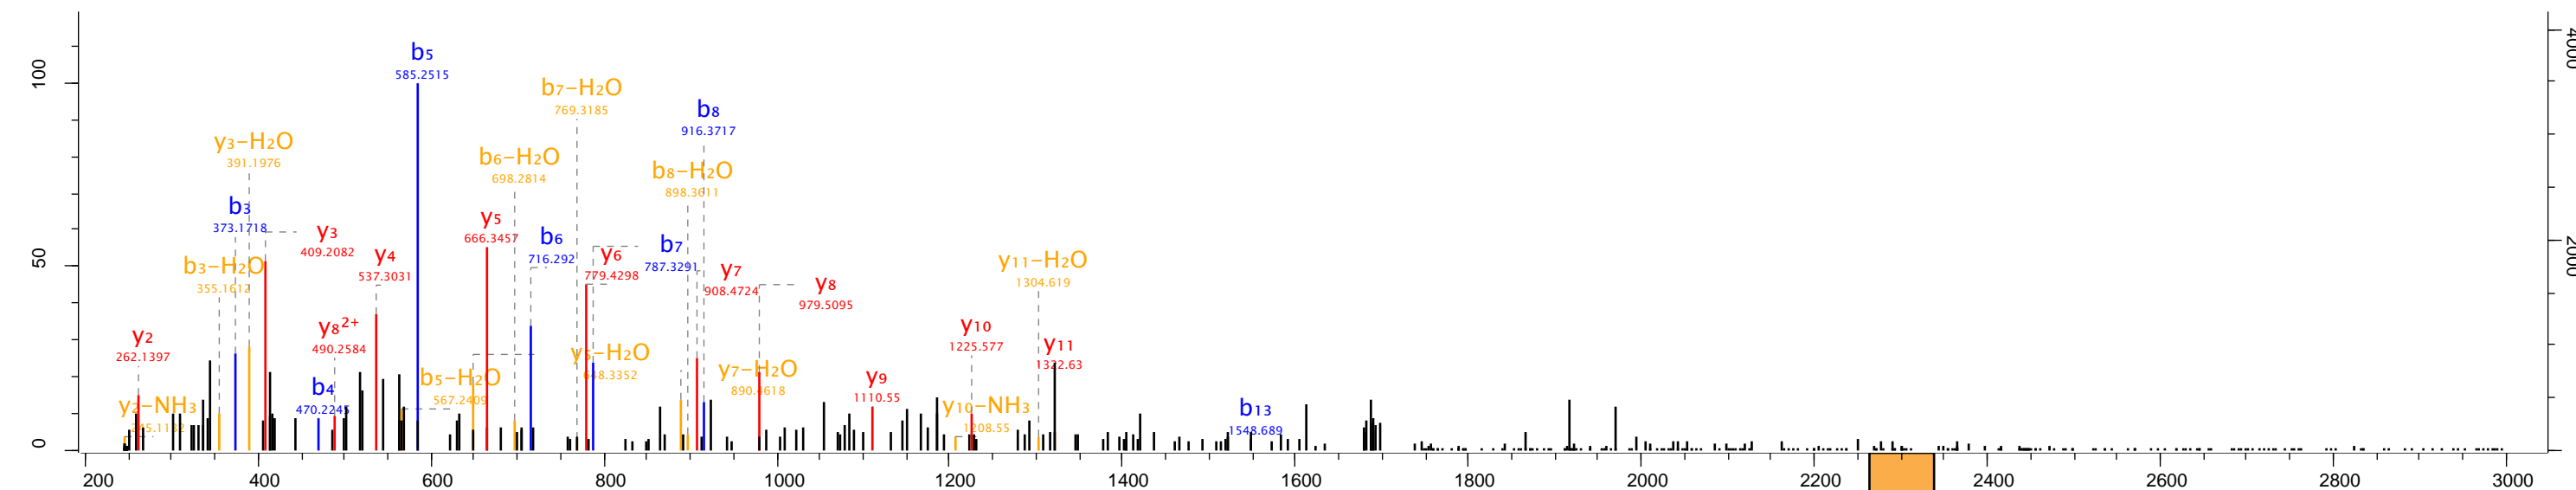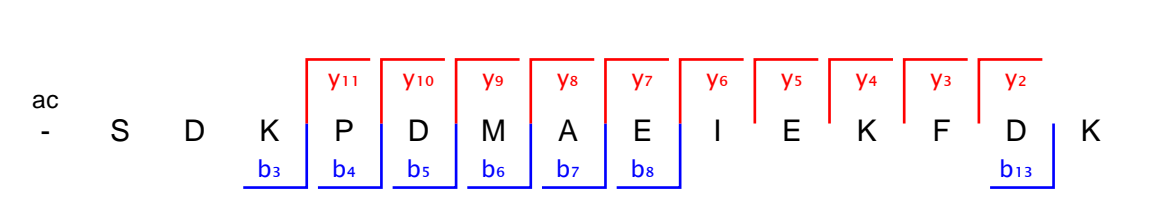

Spectral Annotation for Single-Peptide IDs in 16-cell Embryo using qQ-TOF

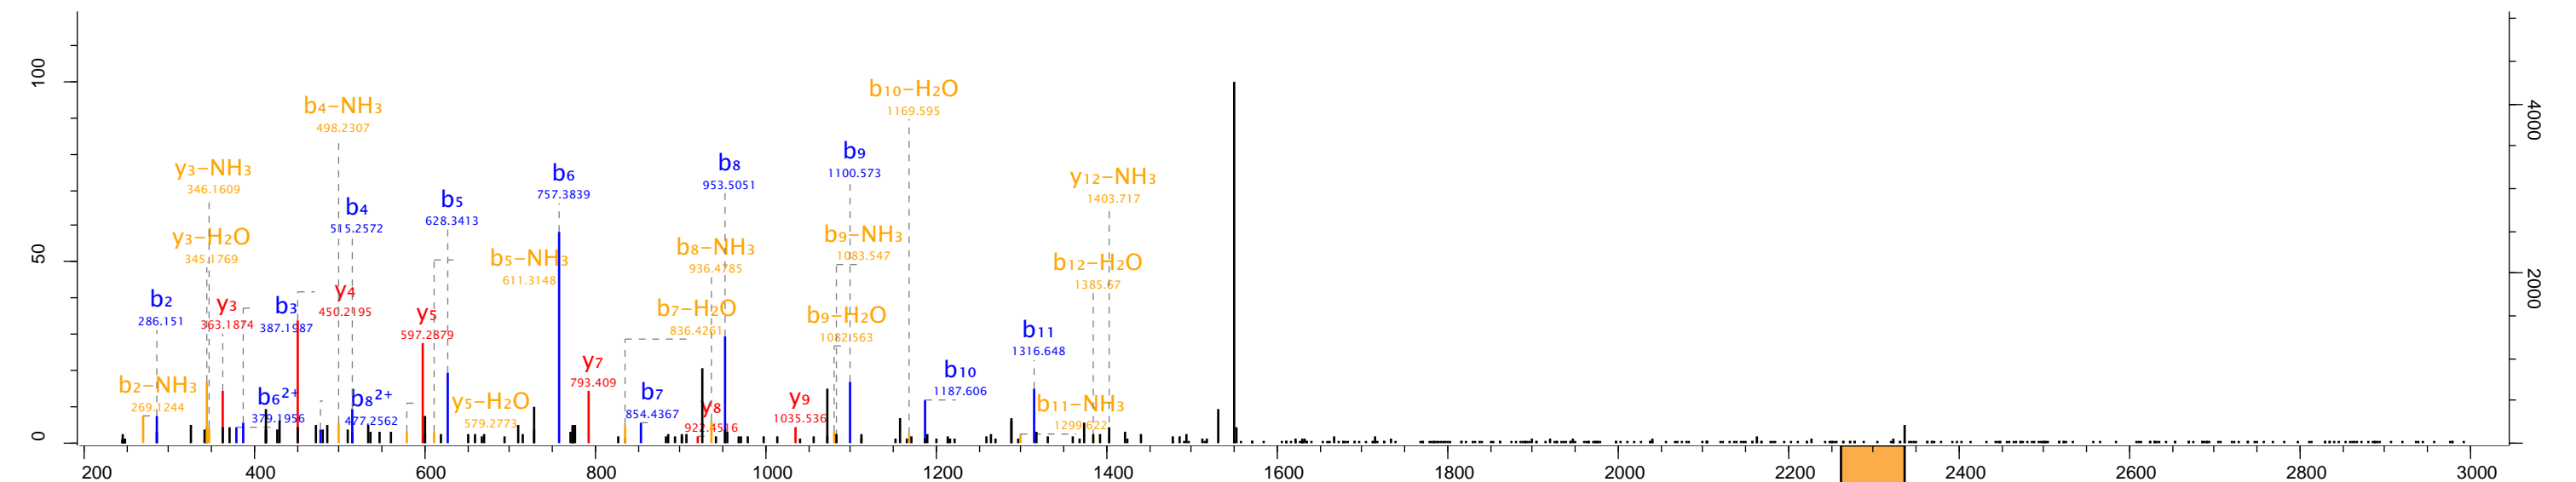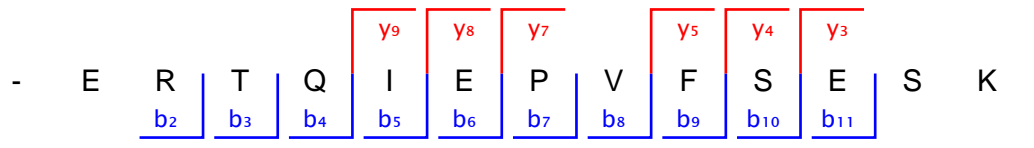

Raw file: 2014-10-22\_CL04\_Embx2dil\_4Hz  
 Scan: 4943 Method: TOF; CID Score: 65.37 m/z: 596.66

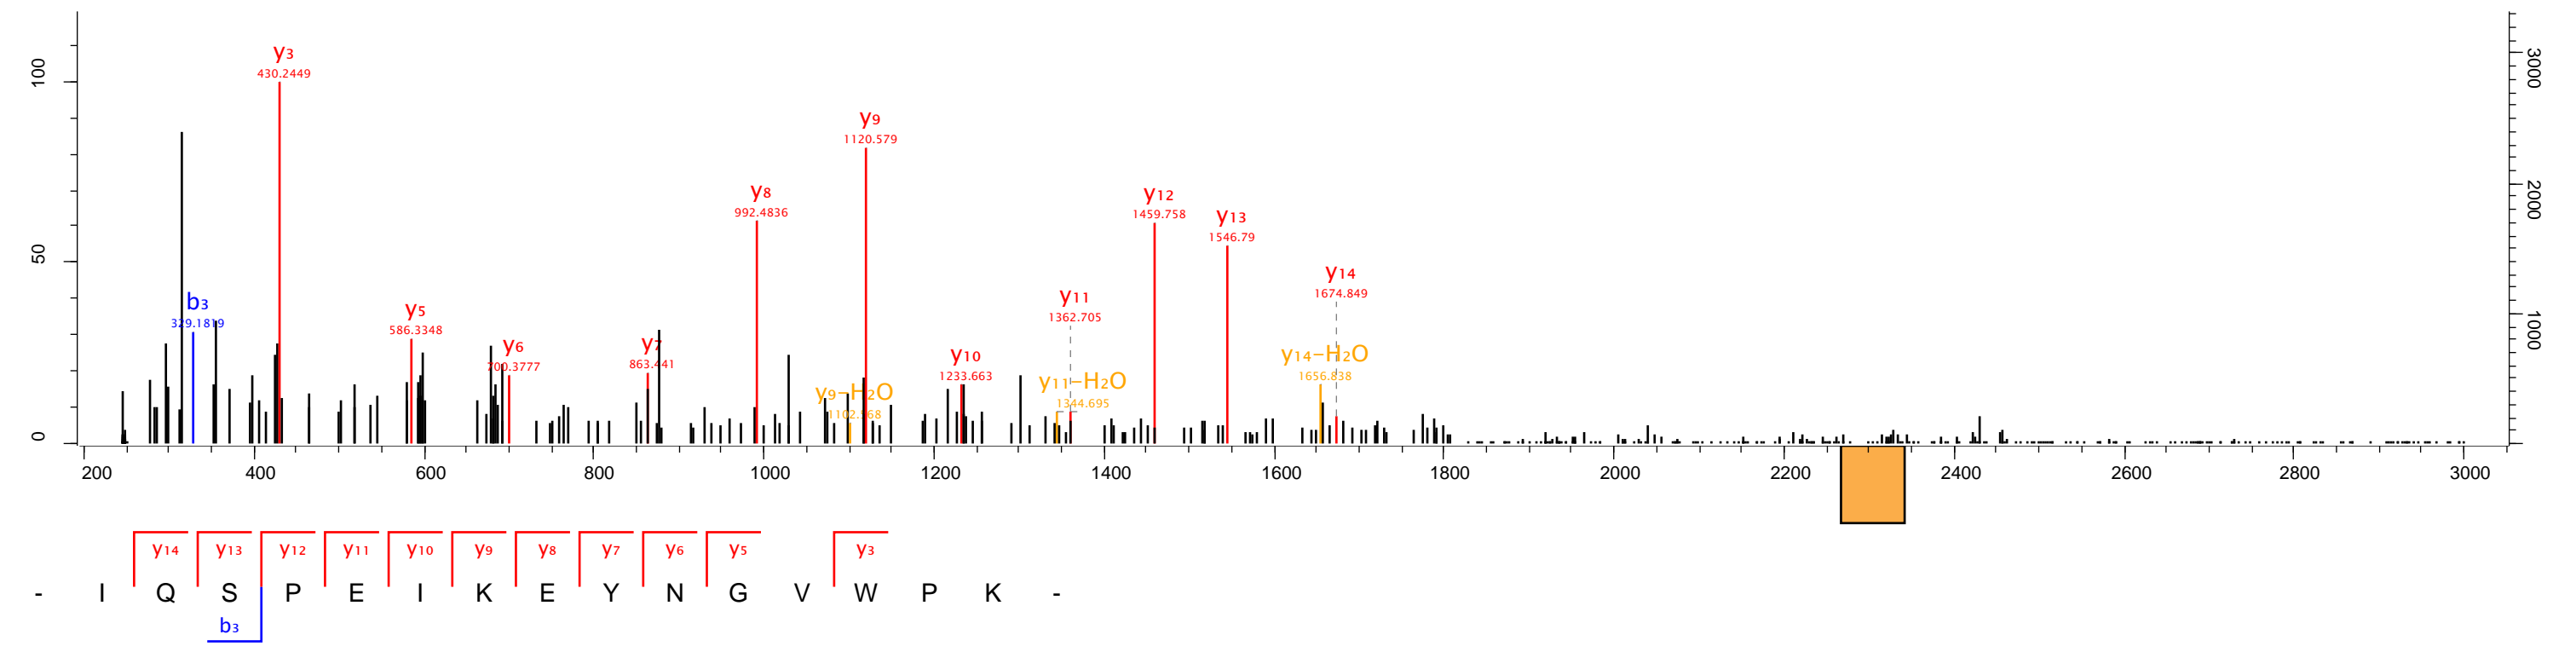

Spectral Annotation for Single-Peptide IDs in 16-cell Embryo using qQ-TOF

Raw file: 2014-10-22\_CL04\_Embx2dil\_4Hz  
 Scan: 5008  
 Method: TOF; CID  
 Score: 29.97  
 m/z: 595.36

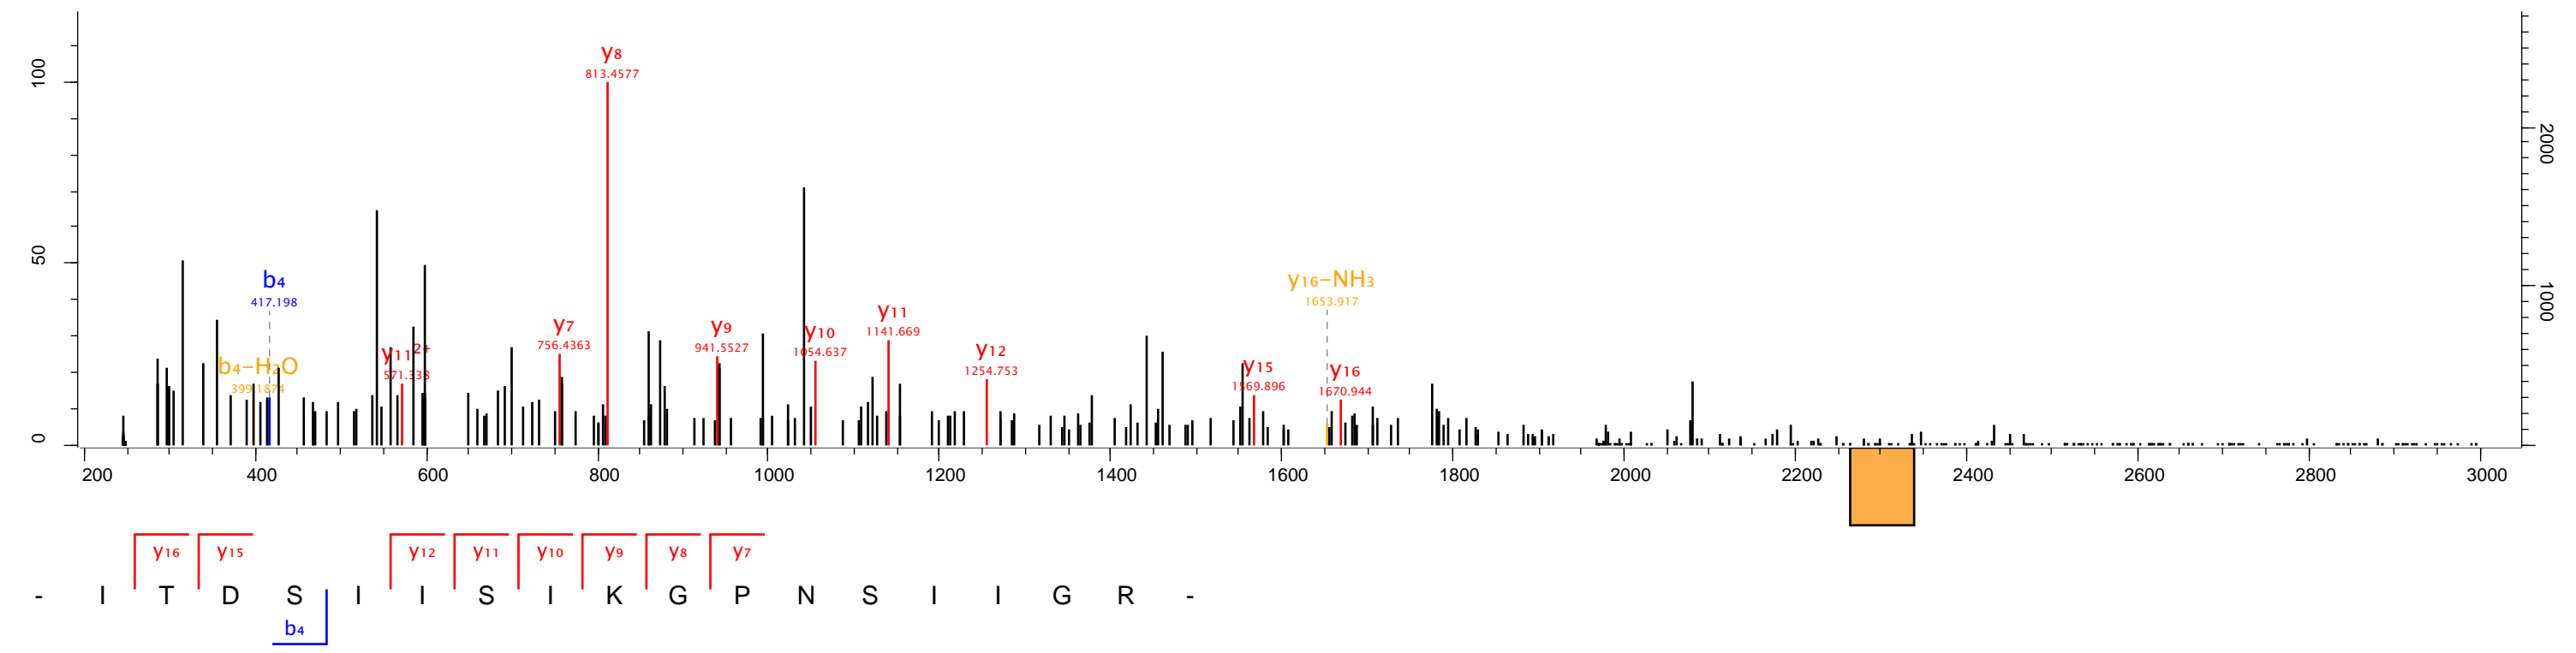

Spectral Annotation for Single-Peptide IDs in 16-cell Embryo using qQ-TOF

Raw file 2014-10-22\_CL04\_Embx2dil\_4Hz Scan 5020 Method TOF; CID Score 142.39 m/z 910.49

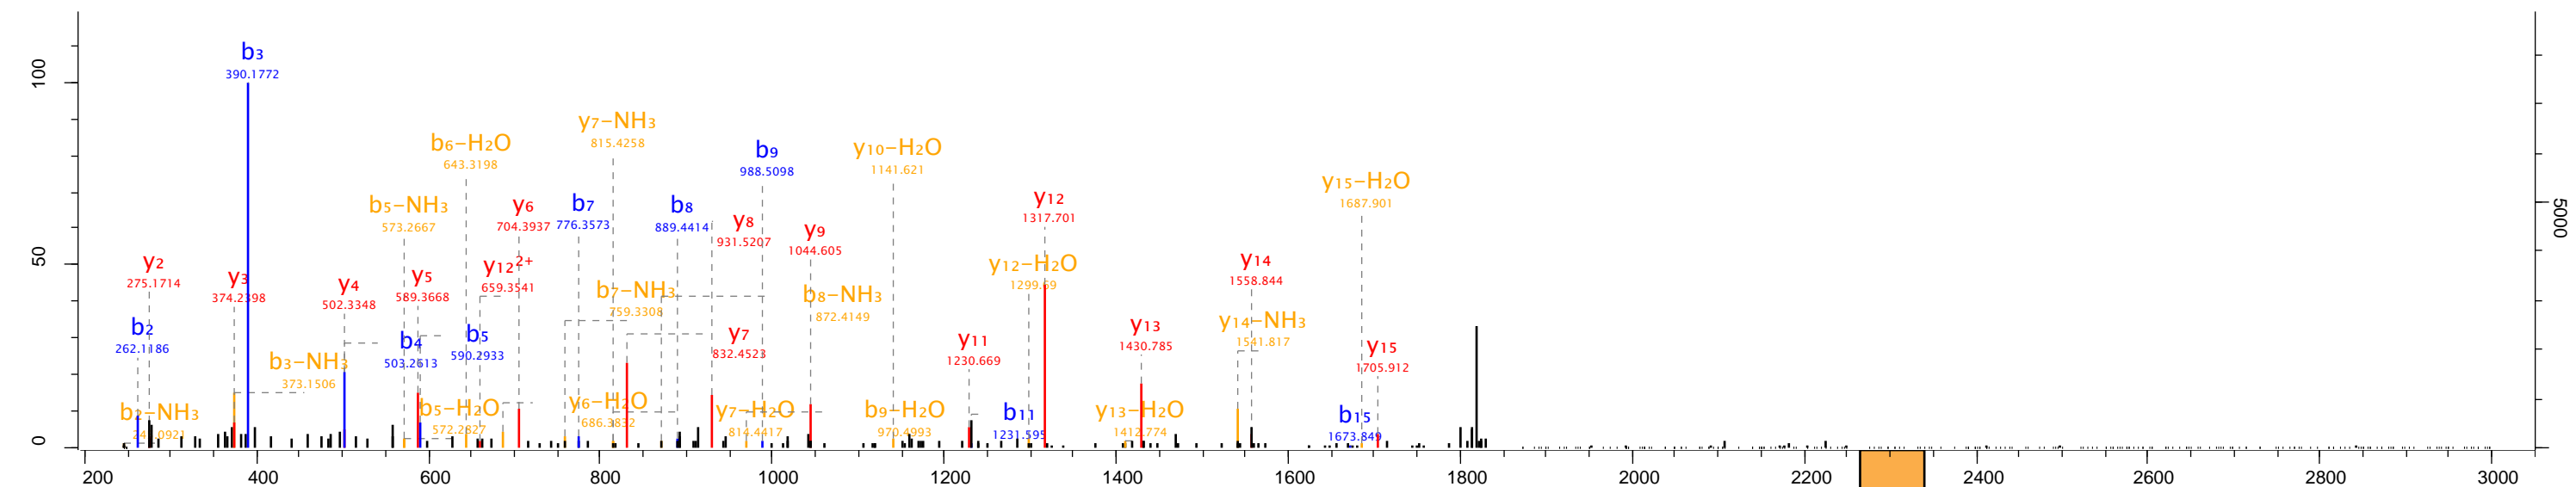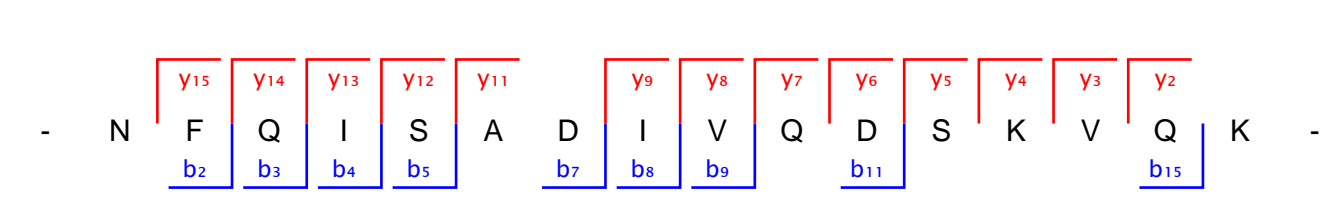

Spectral Annotation for Single-Peptide IDs in 16-cell Embryo using qQ-TOF



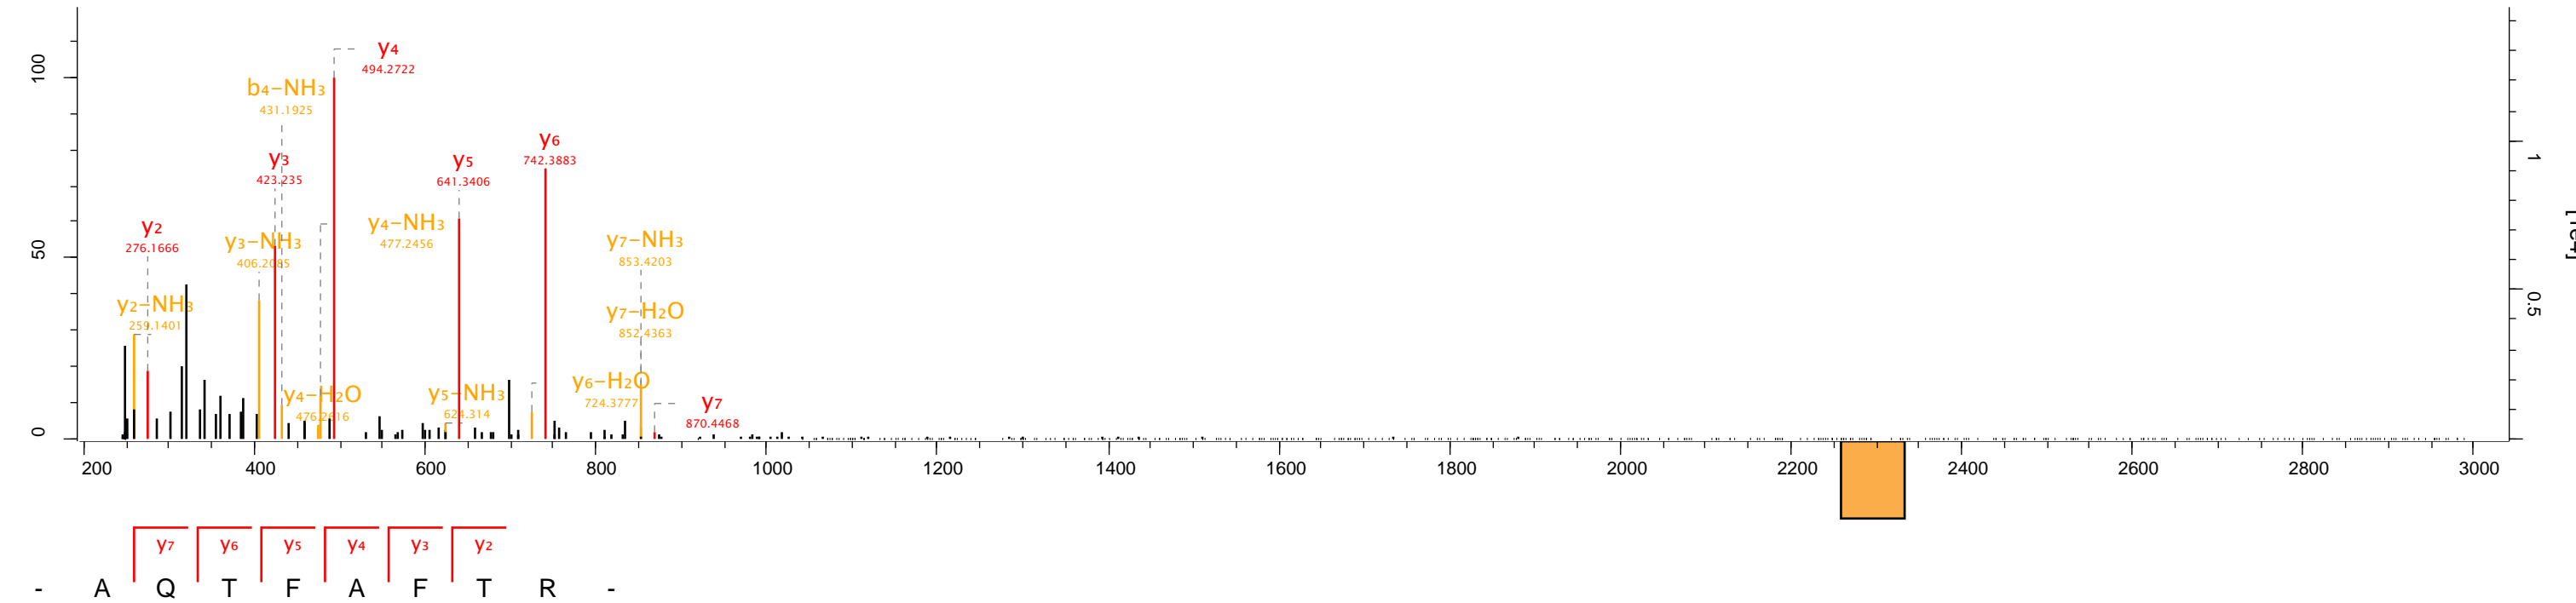

Raw file: 2014-10-22\_CL04\_Embx2dil\_4Hz  
 Scan: 5055 Method: TOF; CID Score: 62.71 m/z: 896.45

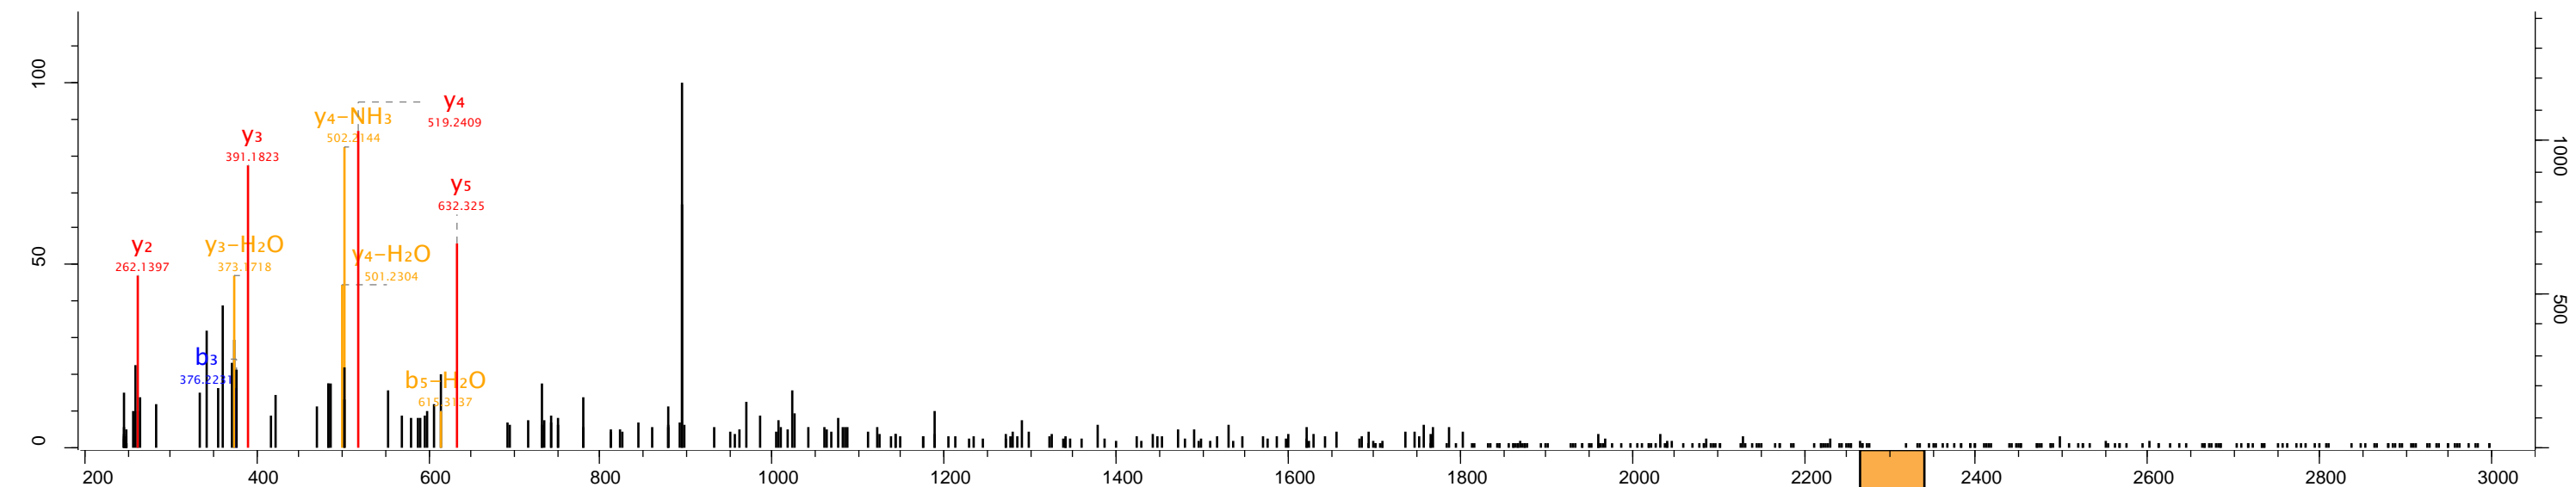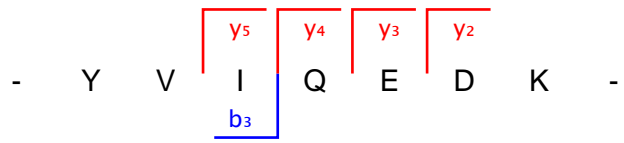

Raw file: 2014-10-22\_CL04\_Embx2dil\_4Hz  
 Scan: 5115 Method: TOF; CID Score: 50.18 m/z: 656.33

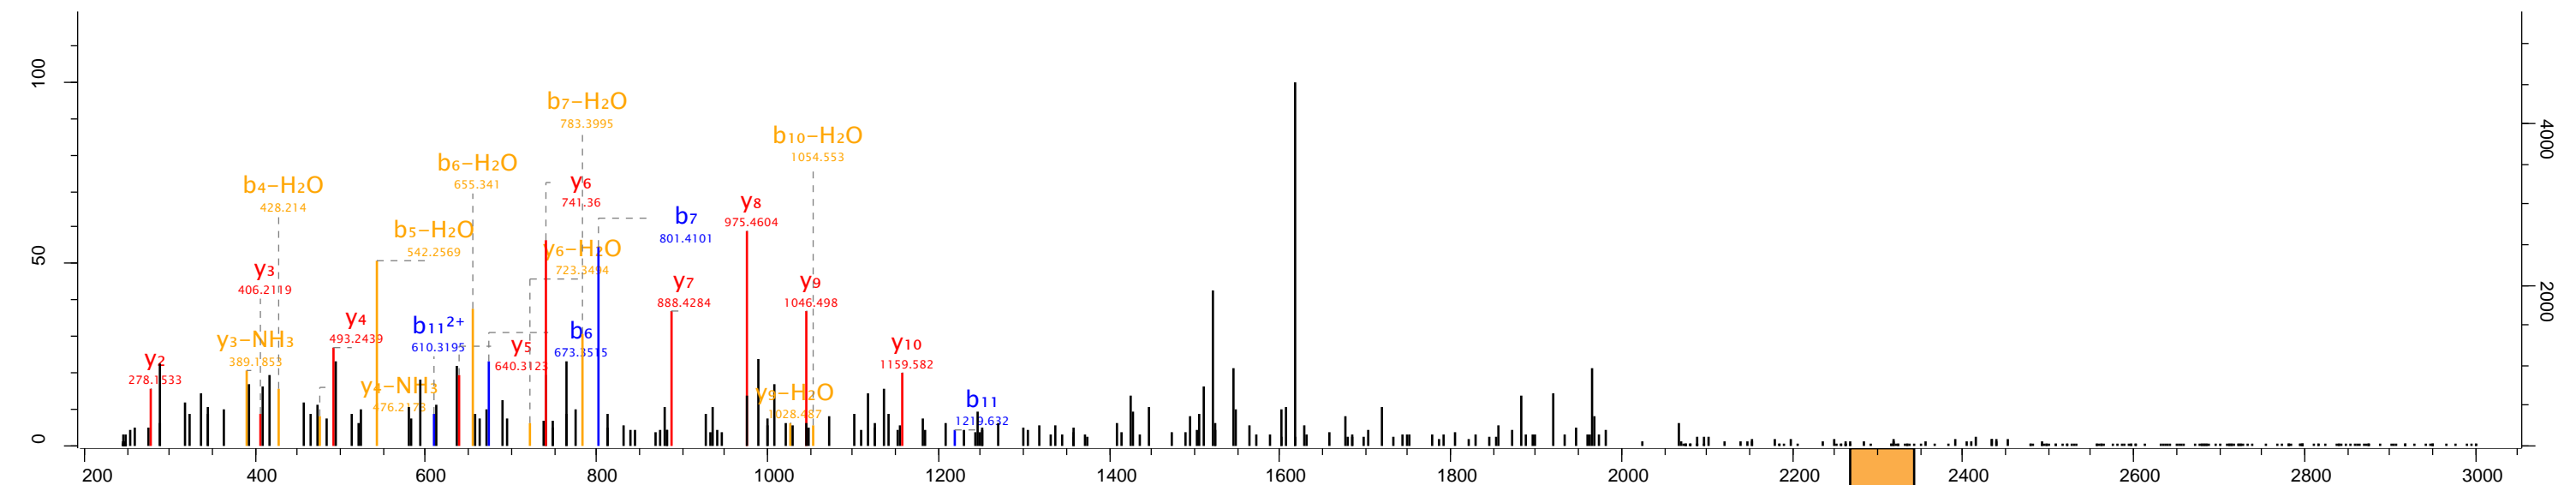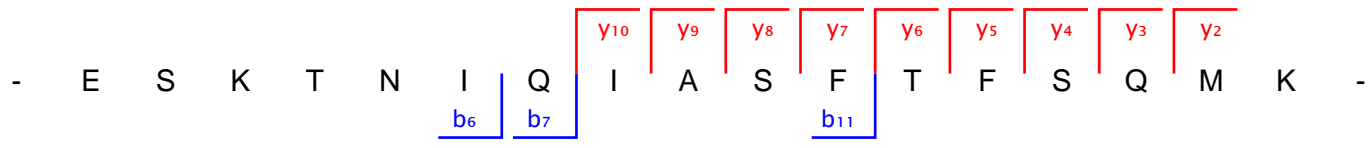

Spectral Annotation for Single-Peptide IDs in 16-cell Embryo using qQ-TOF

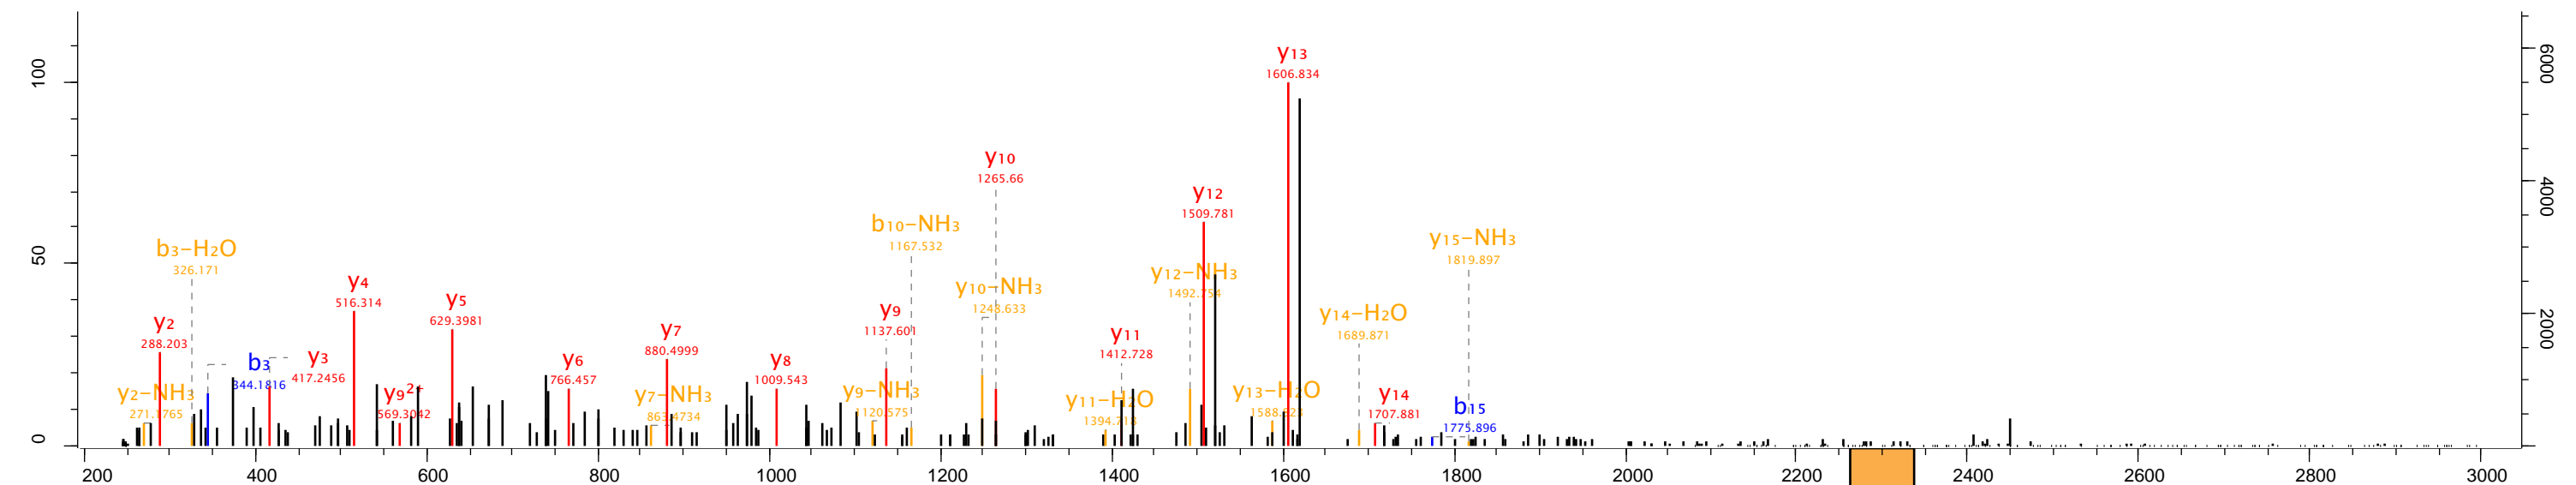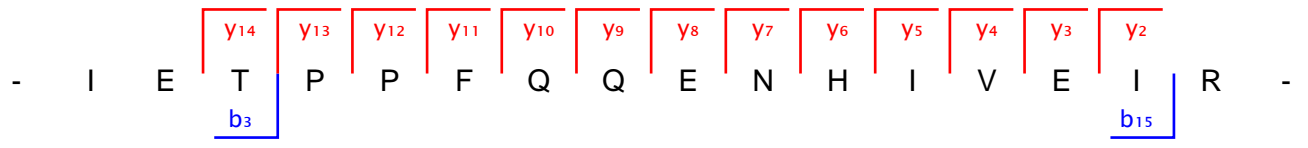

Raw file: 2014-10-22\_CL04\_Embx2dil\_4Hz  
 Scan: 5142 Method: TOF; CID Score: 88.28 m/z: 617.34

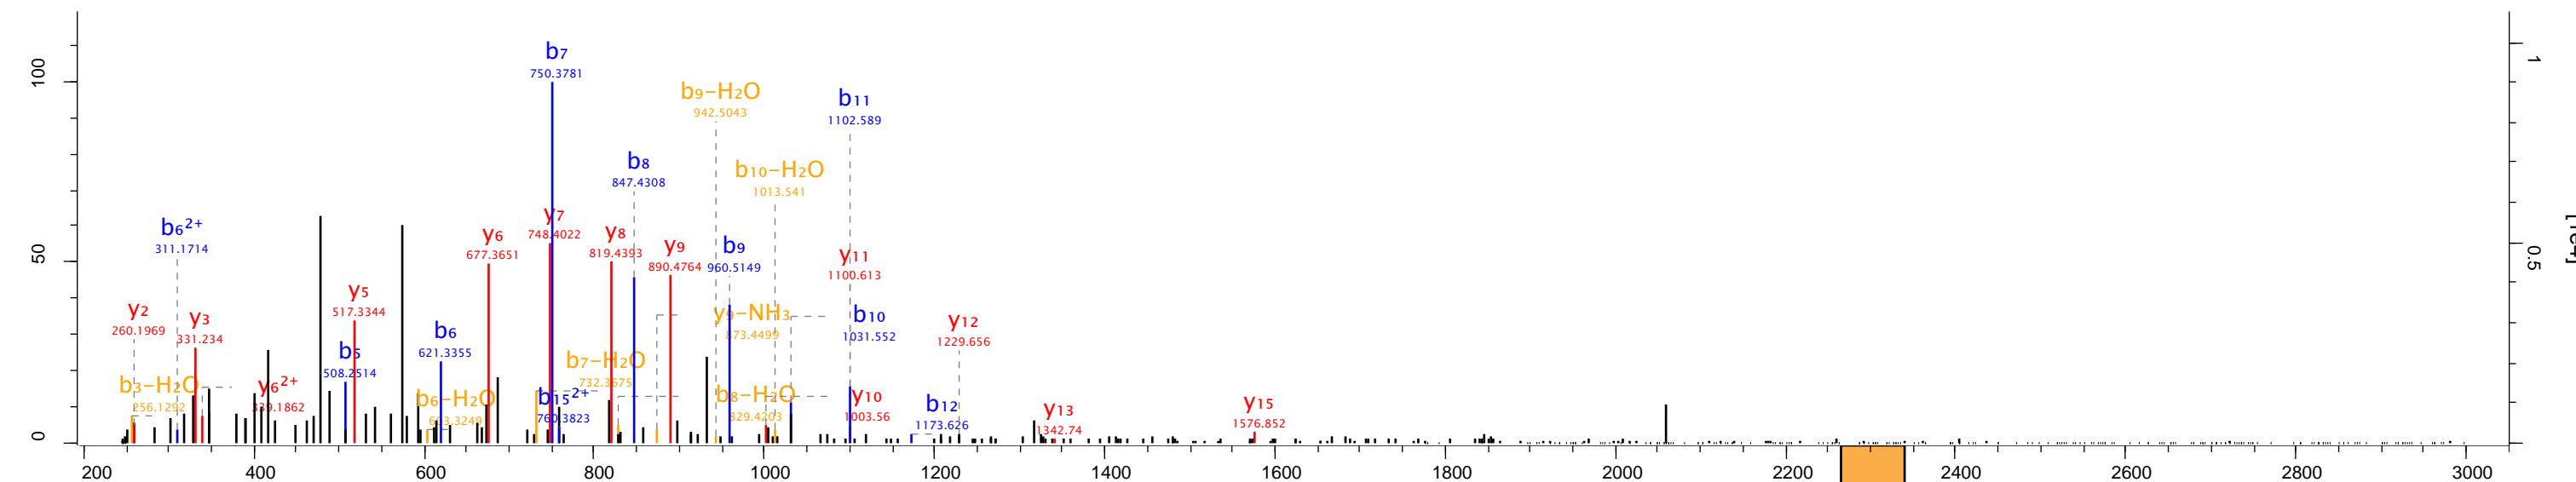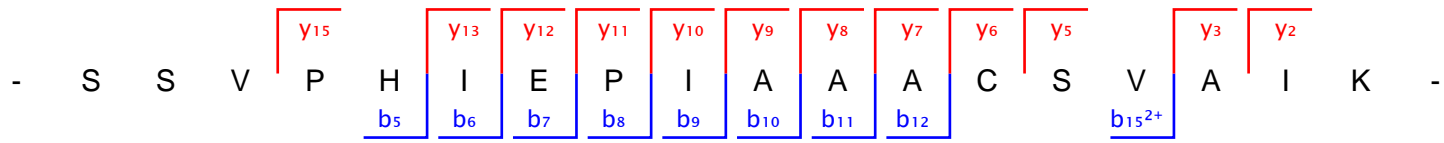

Spectral Annotation for Single-Peptide IDs in 16-cell Embryo using qQ-TOF

Raw file: 2014-10-22\_CL04\_Embx2dil\_4Hz  
 Scan: 5172 Method: TOF; CID Score: 43.3 m/z: 485.29

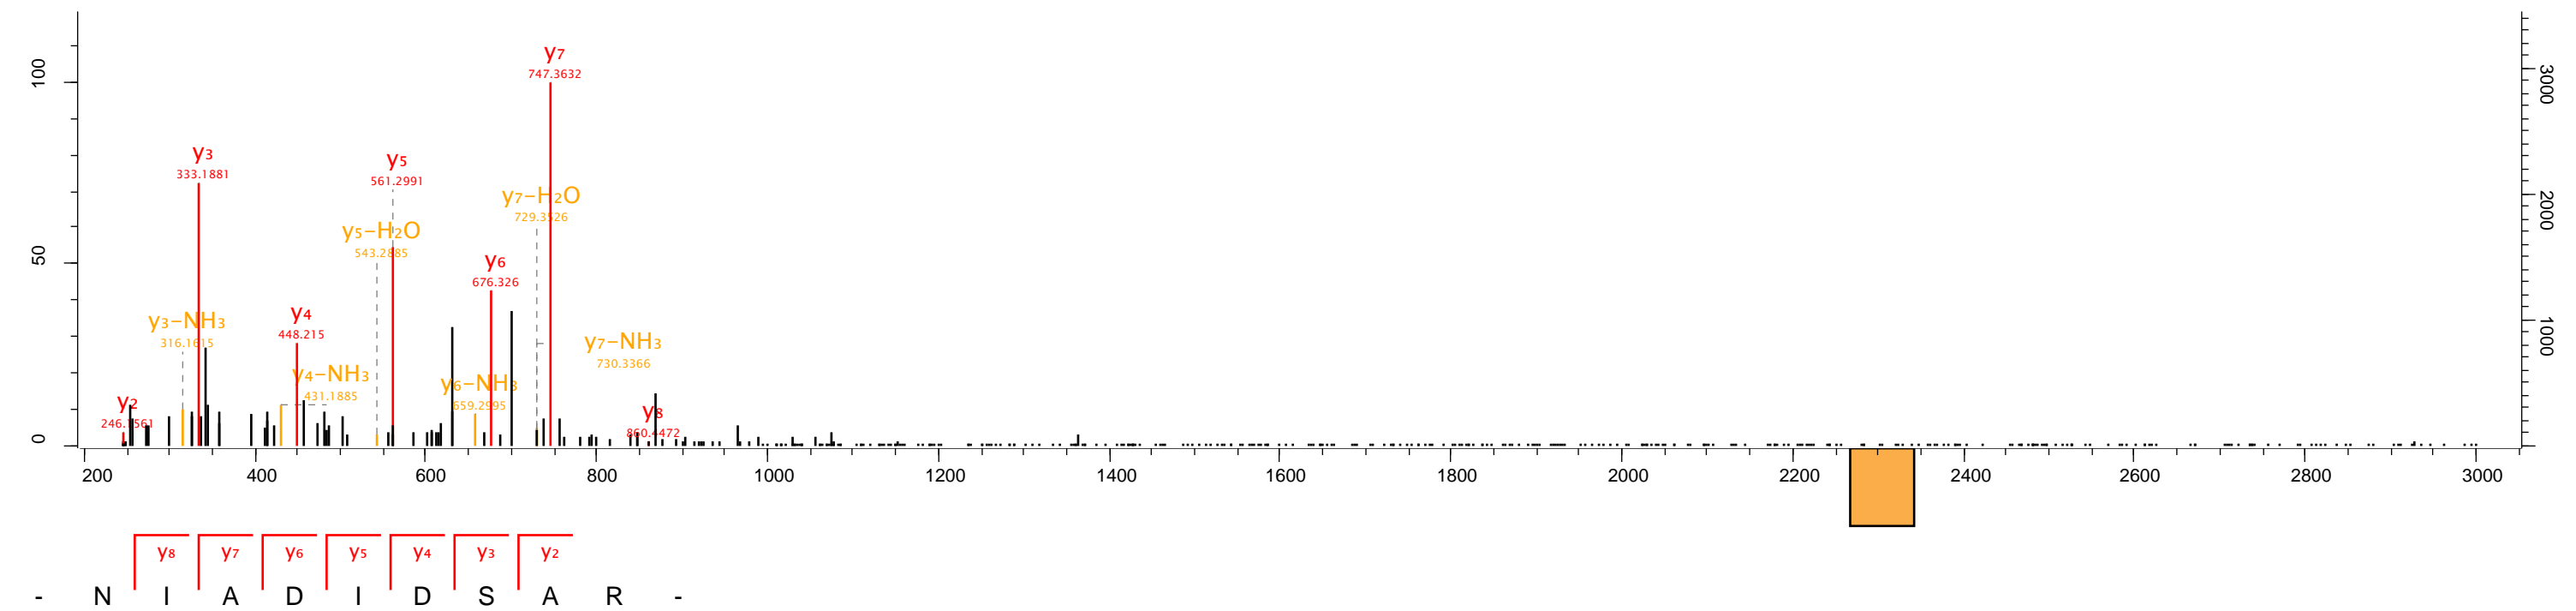

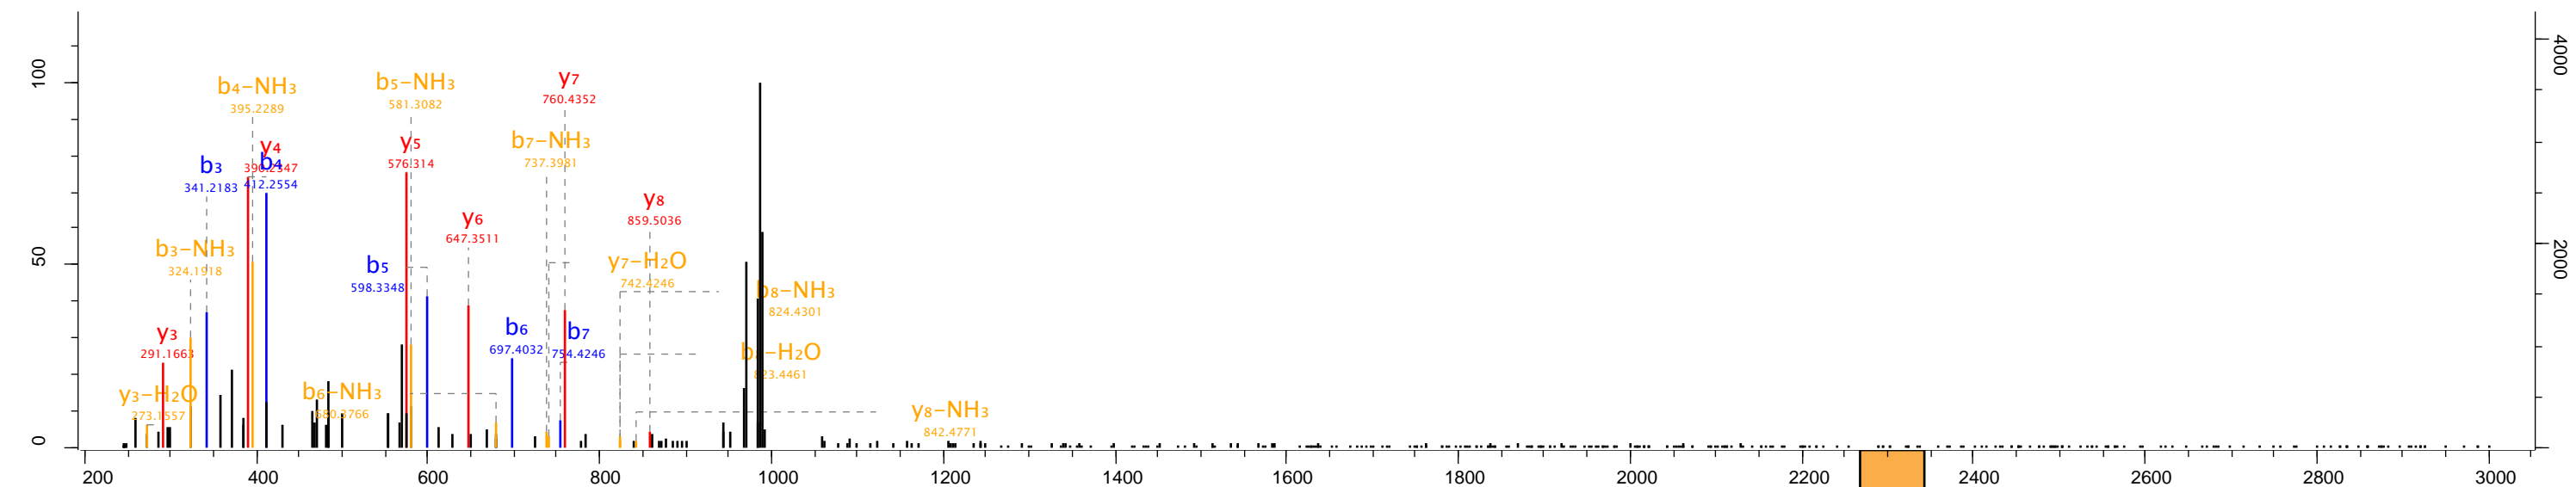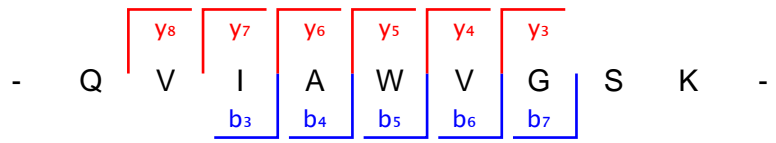

Raw file: 2014-10-22\_CL04\_Embx2dil\_4Hz  
 Scan: 5211 Method: TOF; CID Score: 81.66 m/z: 676.36

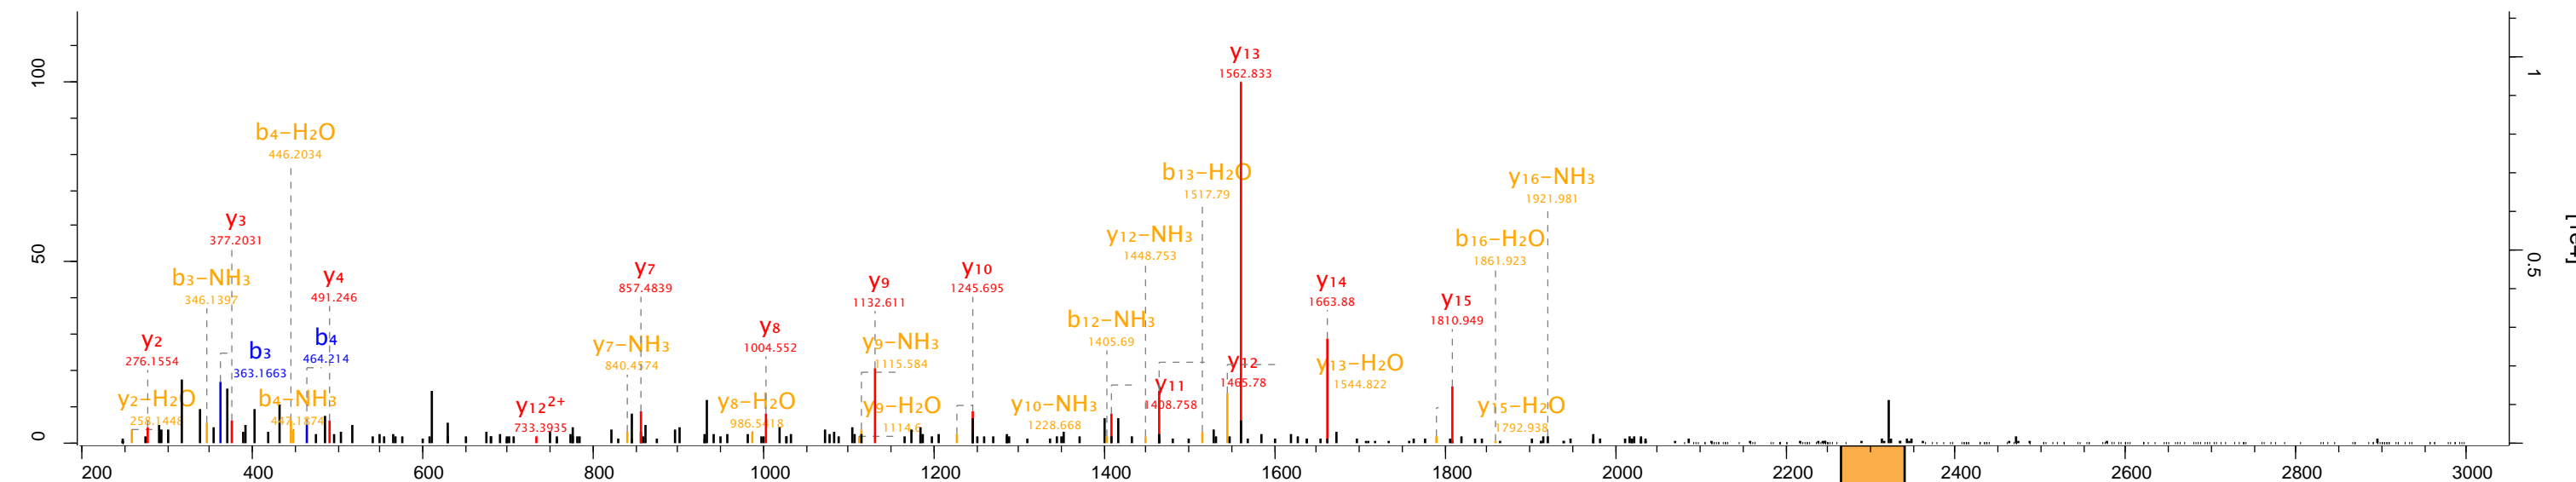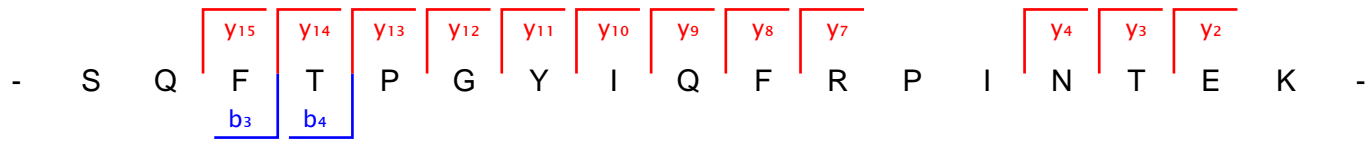

Spectral Annotation for Single-Peptide IDs in 16-cell Embryo using qQ-TOF



Raw file: 2014-10-22\_CL04\_Embx2dil\_4Hz  
 Scan: 5286 Method: TOF; CID Score: 63.42 m/z: 565.28

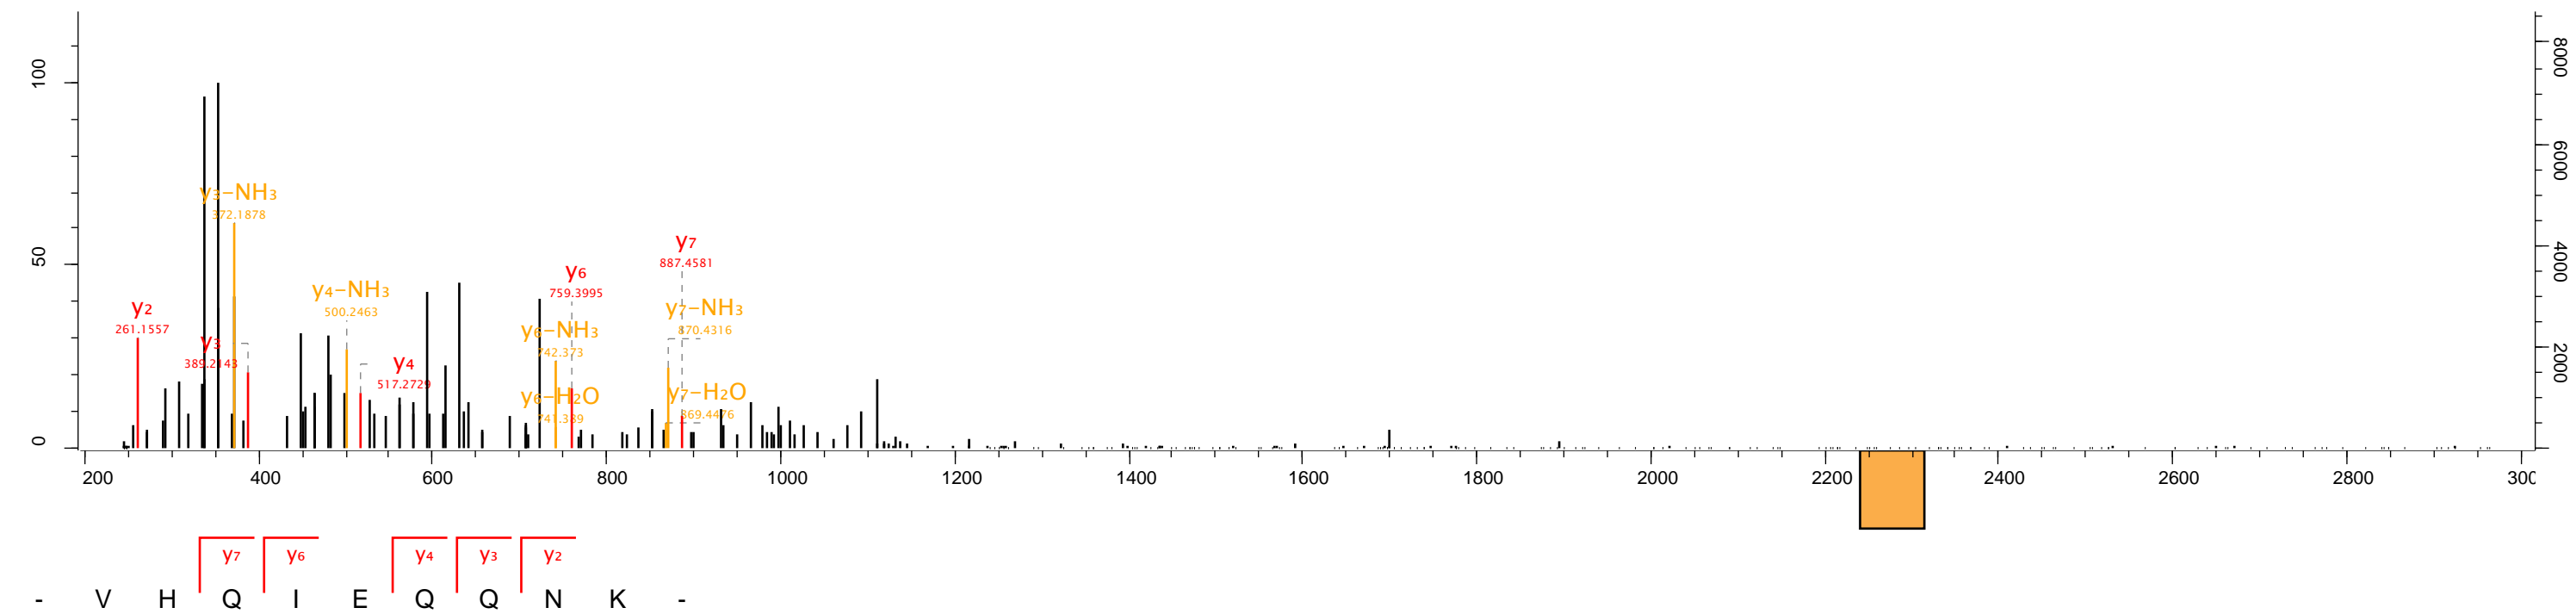

Raw file: 2014-10-22\_CL04\_Embx2dil\_4Hz  
 Scan: 5309 Method: TOF; CID Score: 86.02 m/z: 652.37

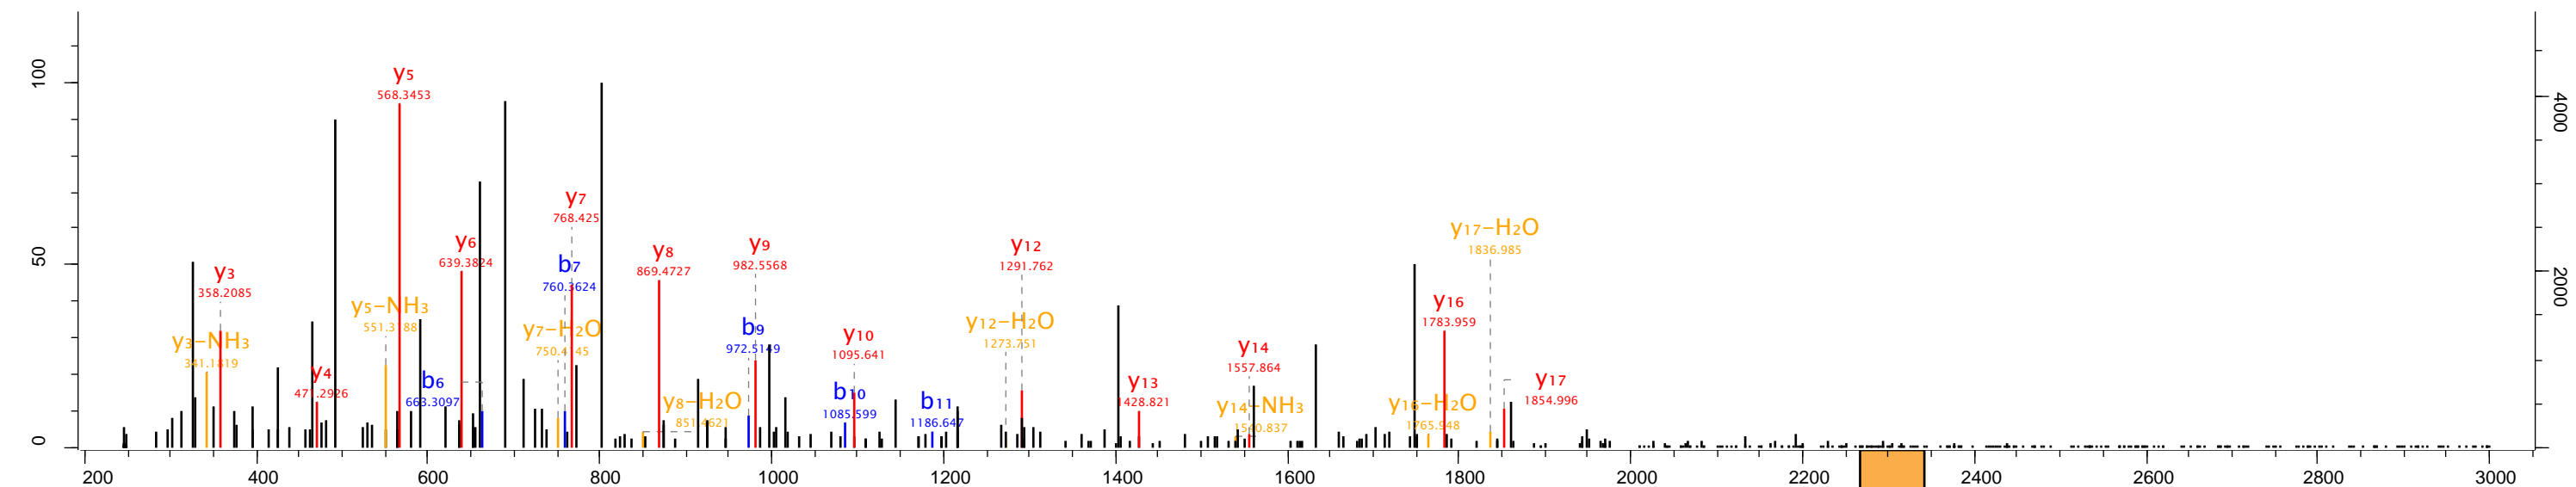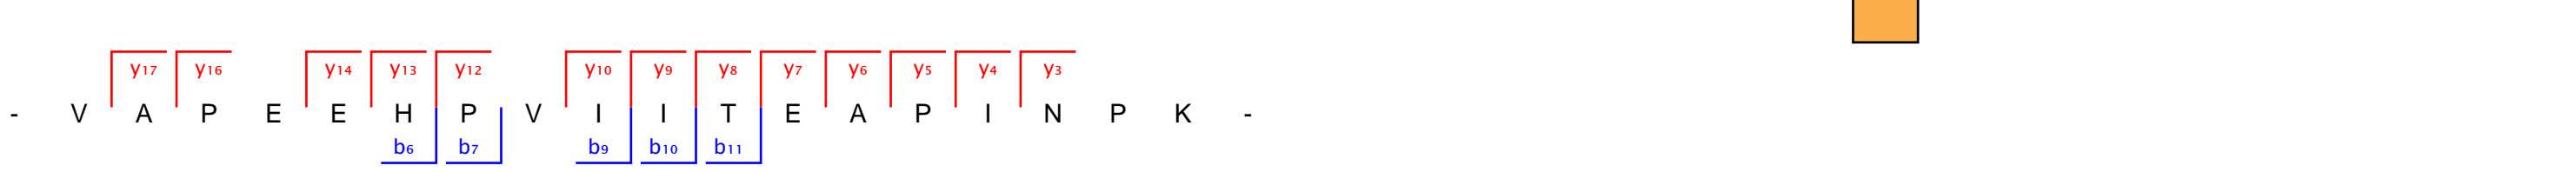

Spectral Annotation for Single-Peptide IDs in 16-cell Embryo using qQ-TOF

Raw file 2014-10-22\_CL04\_Embx2dil\_4Hz Scan 5351 Method TOF; CID Score 73.67 m/z 563.3

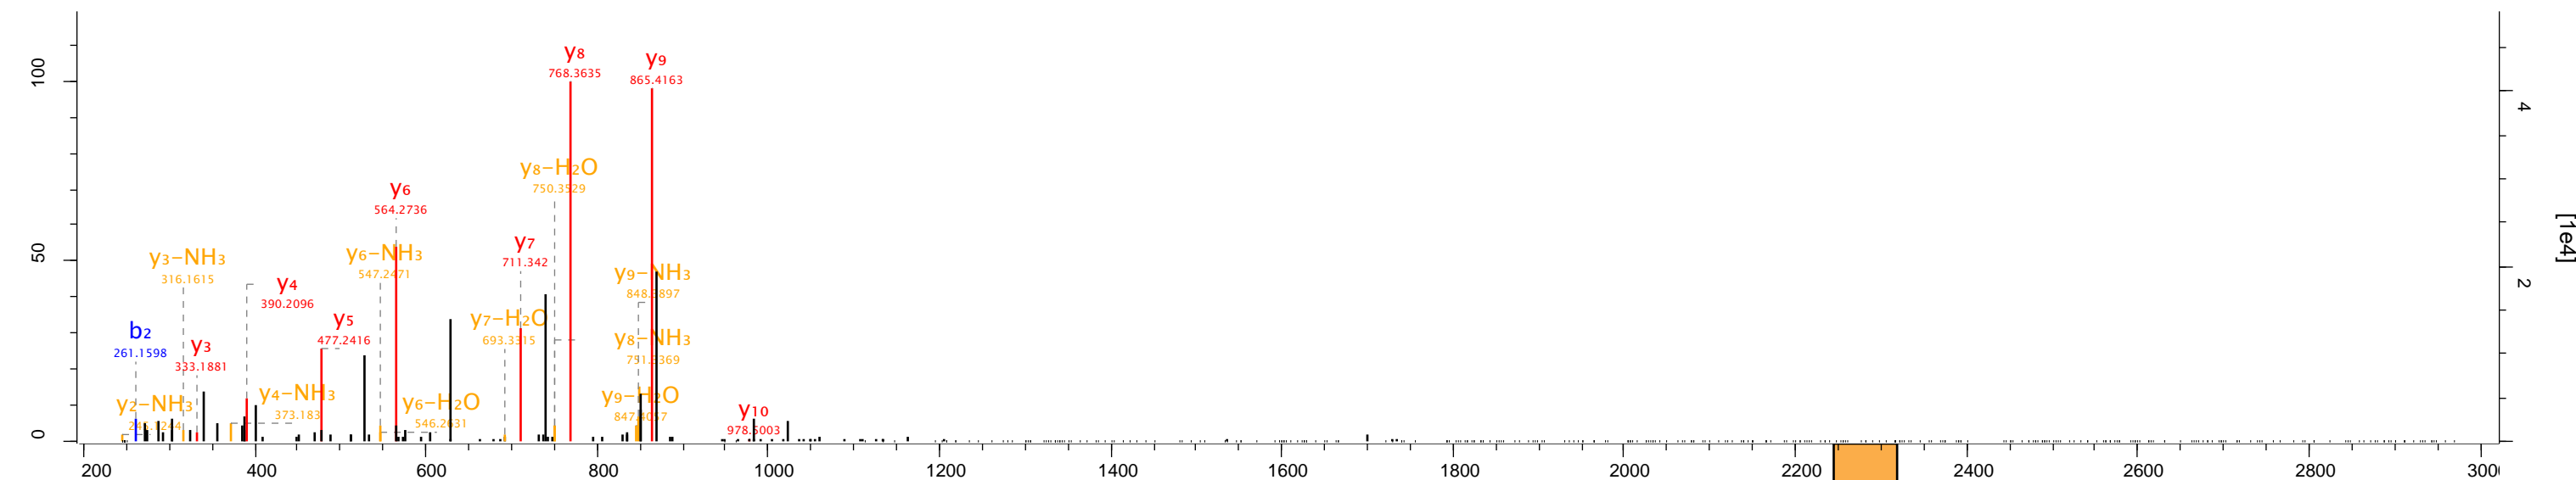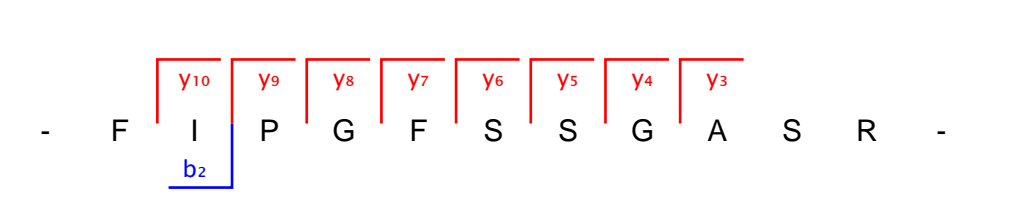

Raw file: 2014-10-22\_CL04\_Embx2dil\_4Hz  
 Scan: 5418 Method: TOF; CID Score: 89.83 m/z: 535.33

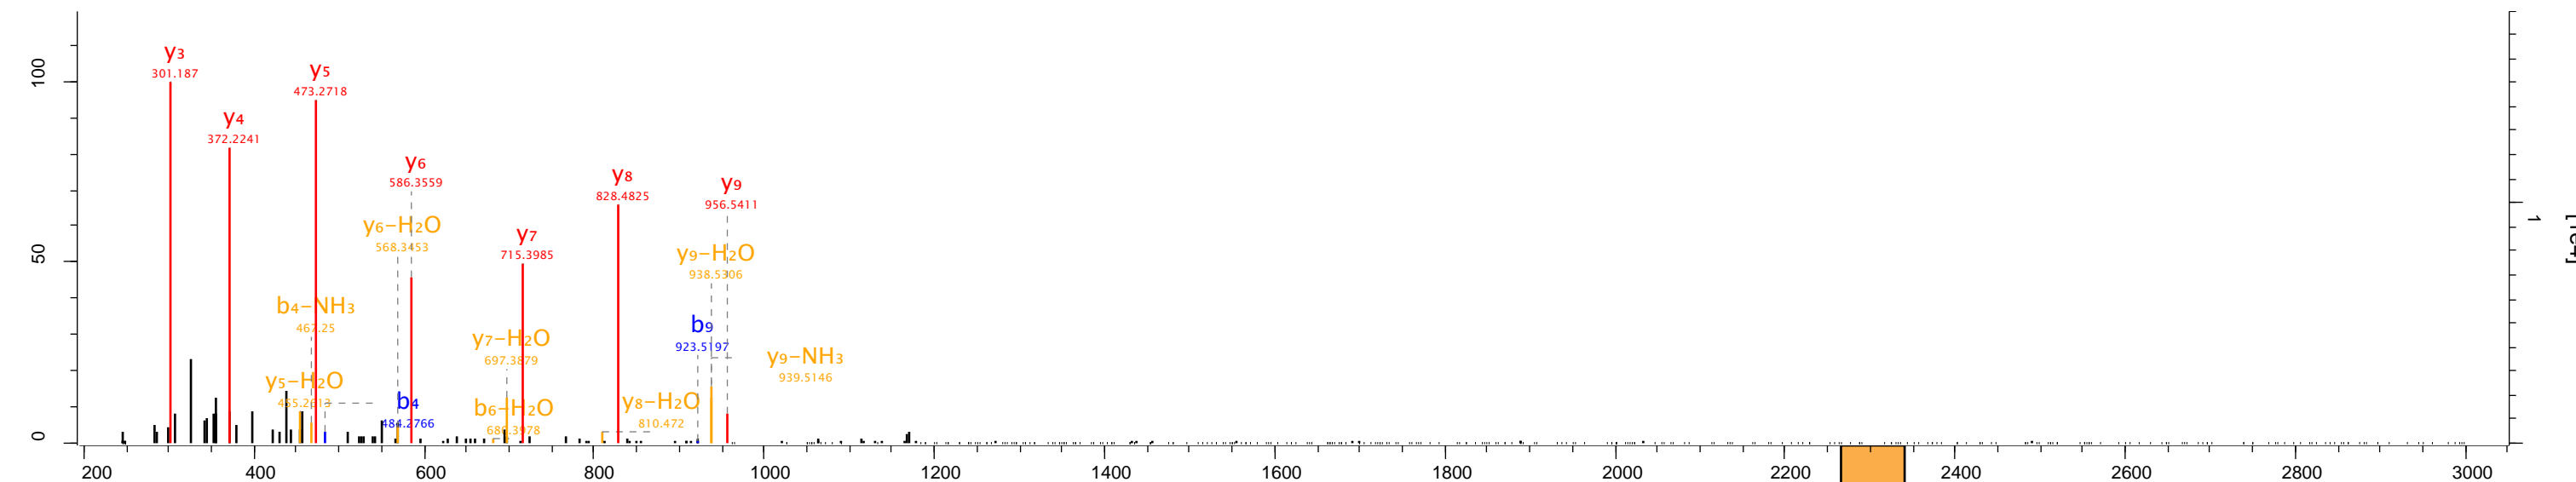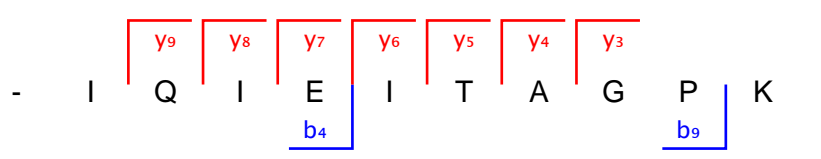

Raw file: 2014-10-22\_CL04\_Embx2dil\_4Hz  
 Scan: 5435 Method: TOF; CID Score: 60.83 m/z: 535.32

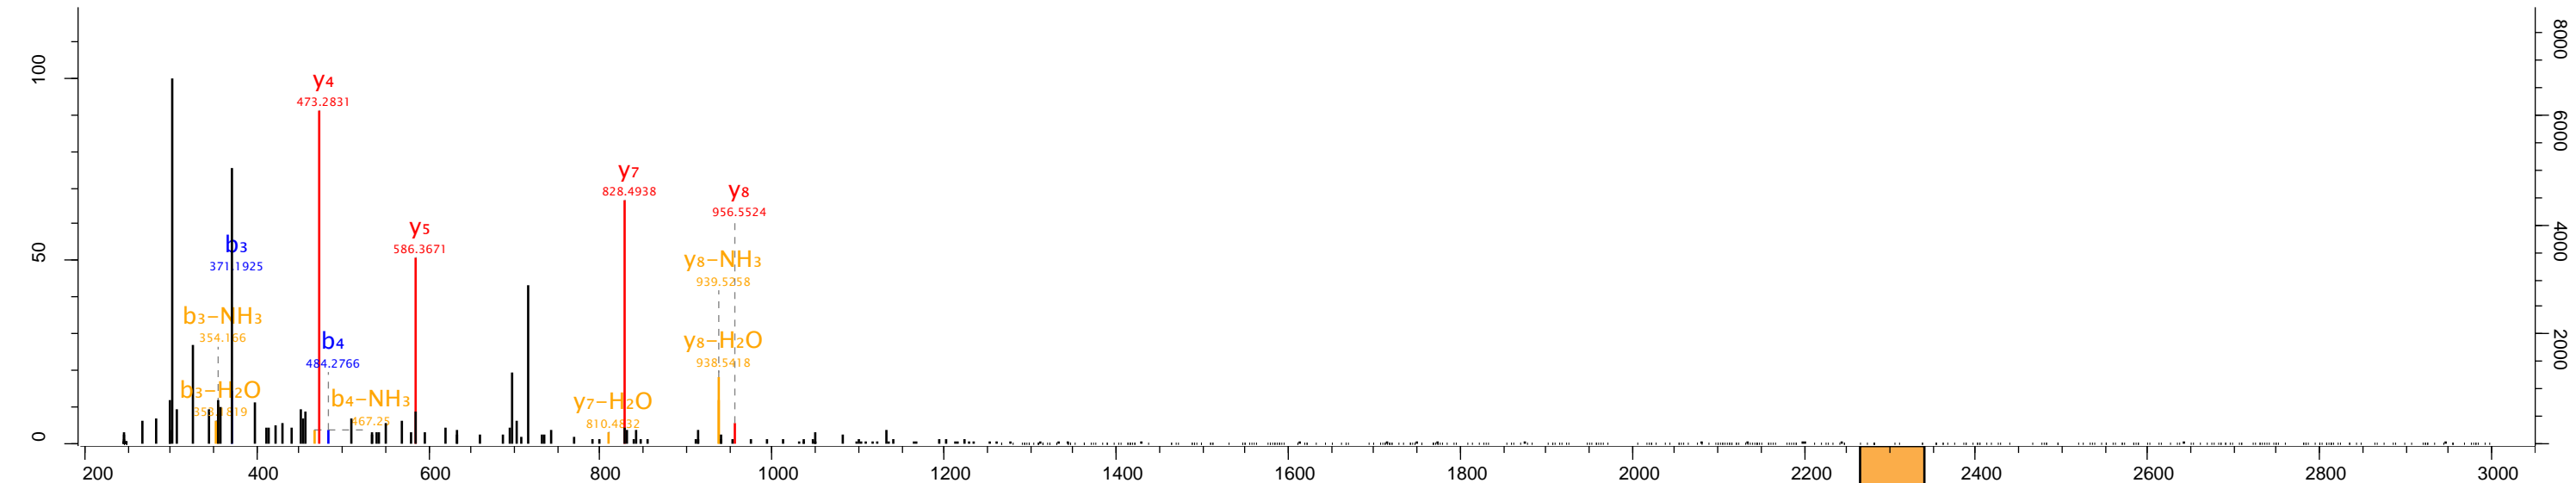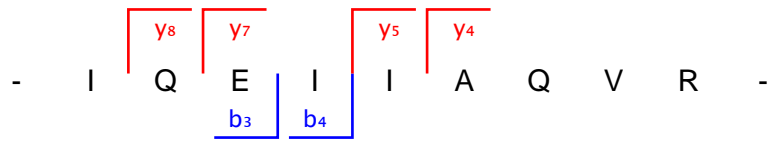

Spectral Annotation for Single-Peptide IDs in 16-cell Embryo using qQ-TOF

Raw file 2014-10-22\_CL04\_Embx2dil\_4Hz Scan 5536 Method TOF; CID Score 39.62 m/z 595.35

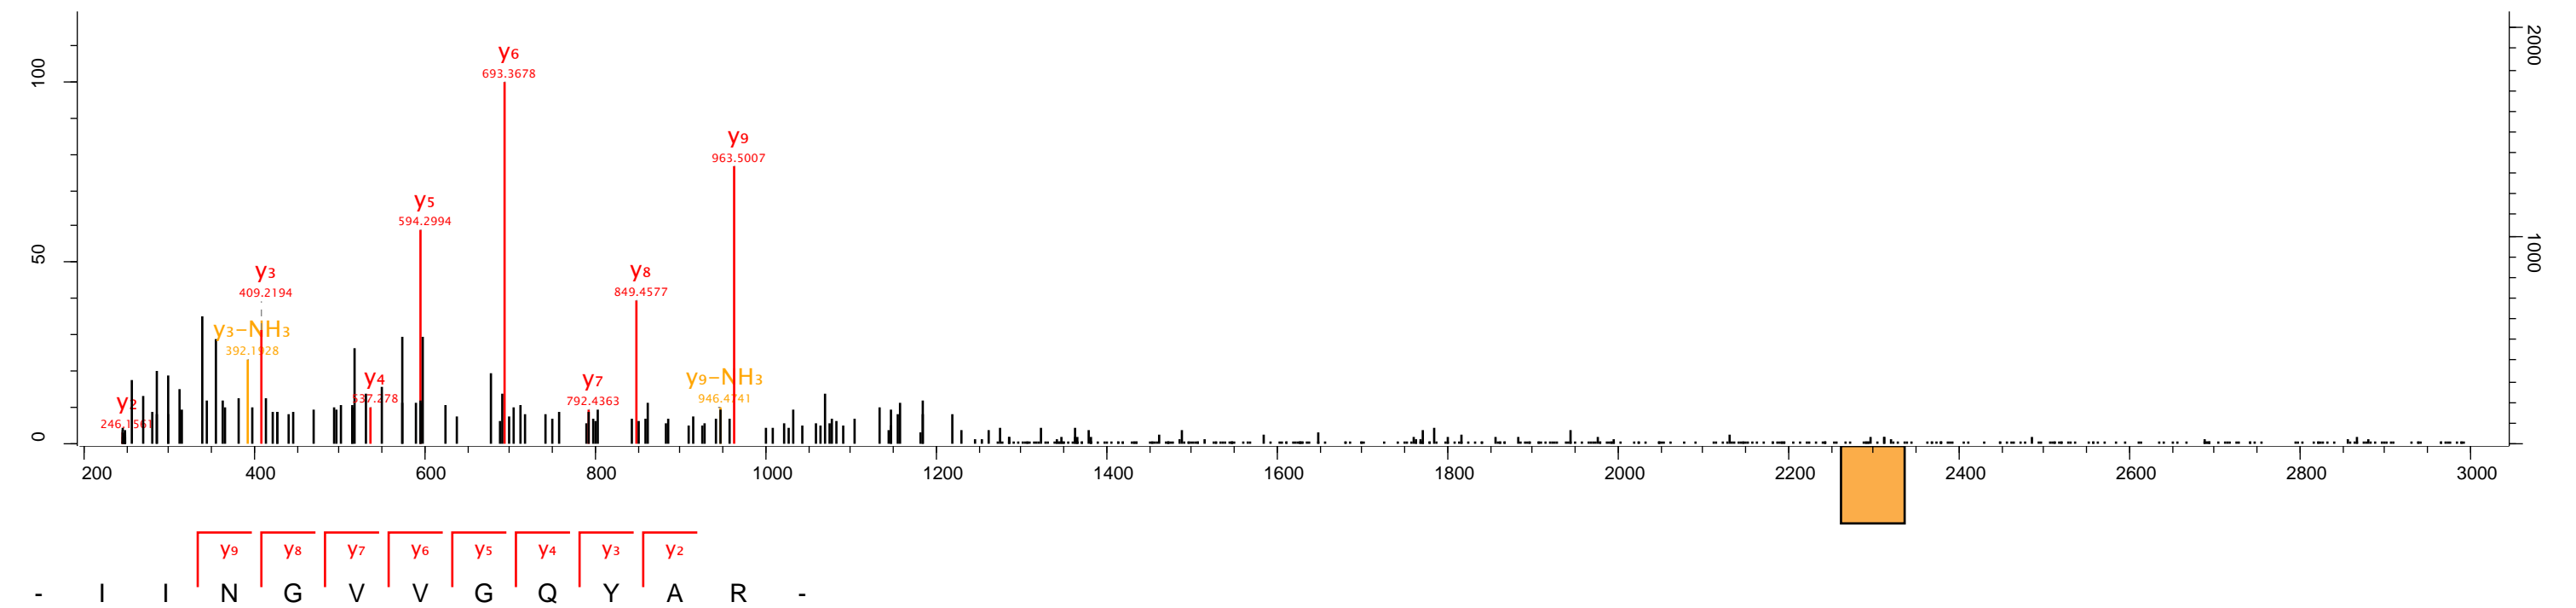

Raw file: 2014-10-22\_CL04\_Embx2dil\_4Hz  
 Scan: 5566 Method: TOF; CID Score: 81.92 m/z: 592.83

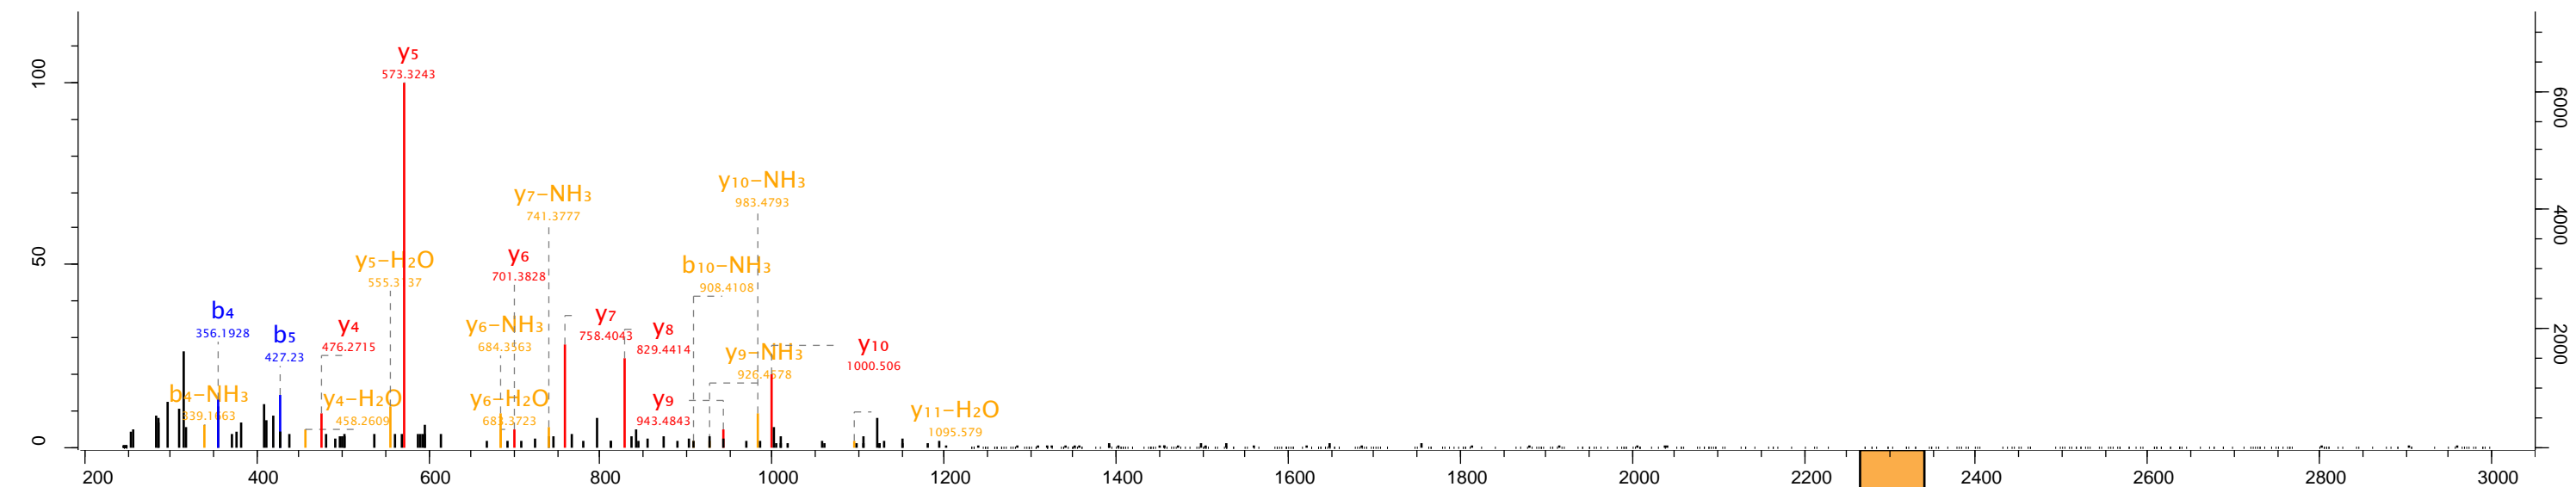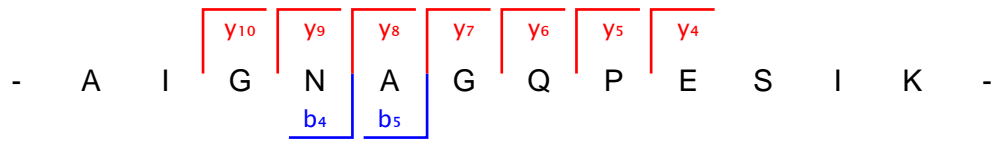

Raw file: 2014-10-22\_CL04\_Embx2dil\_4Hz  
 Scan: 5587 Method: TOF; CID Score: 50.22 m/z: 602.33

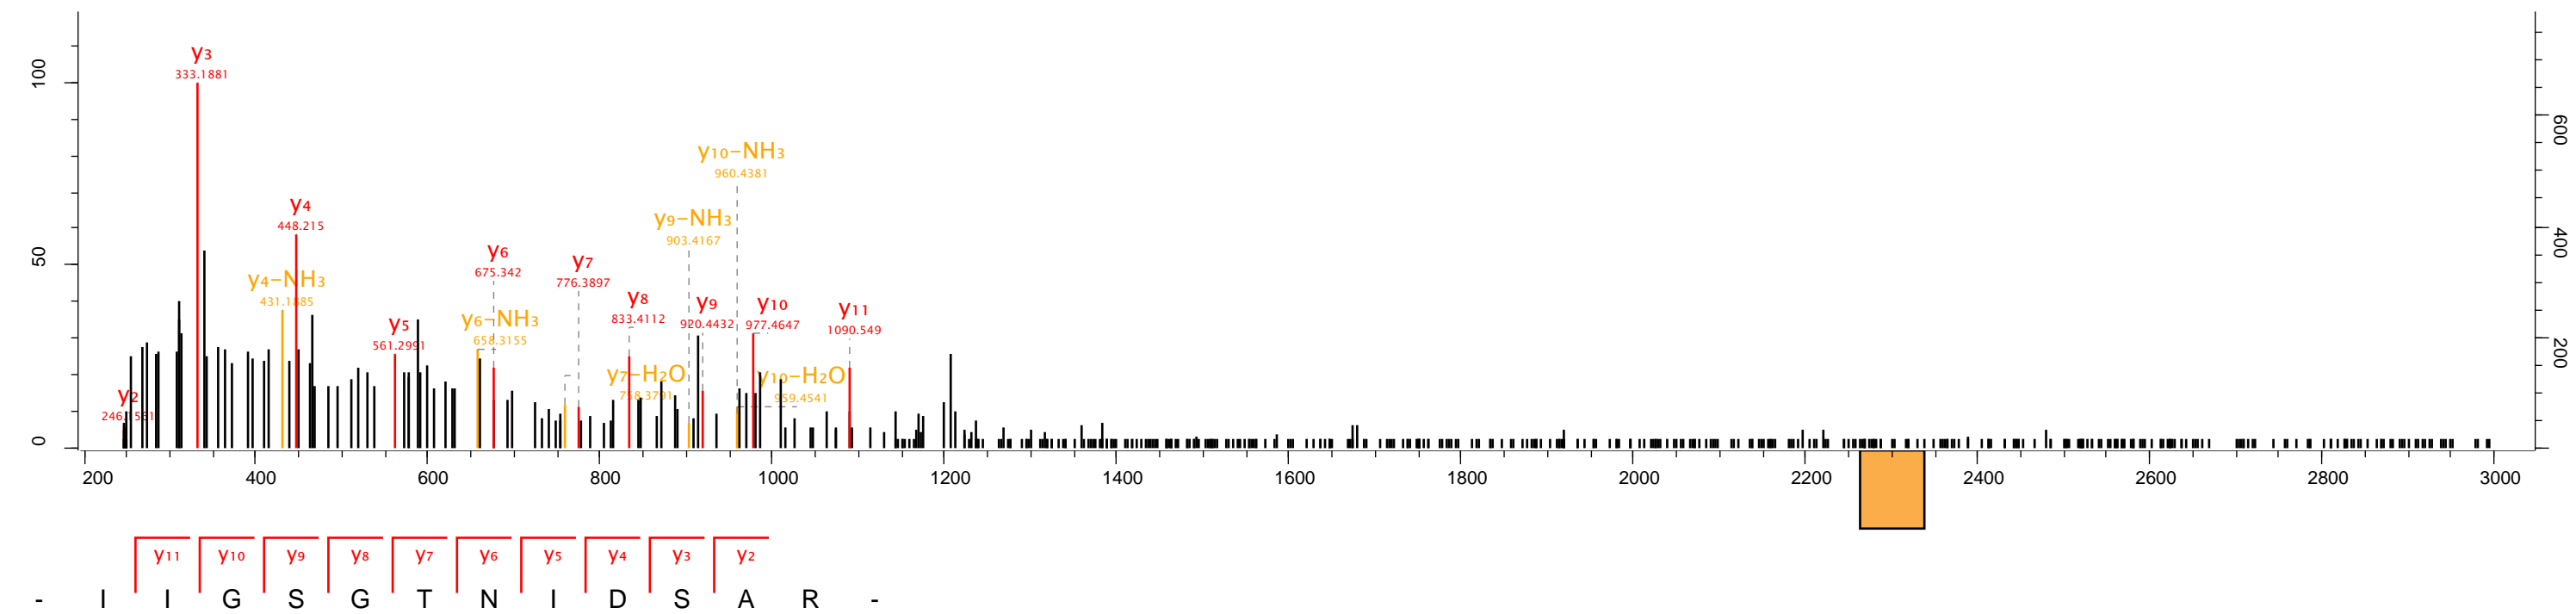



Raw file: 2014-10-22\_CL04\_Embx2dil\_4Hz  
 Scan: 5716 Method: TOF; CID Score: 162.26 m/z: 687.88

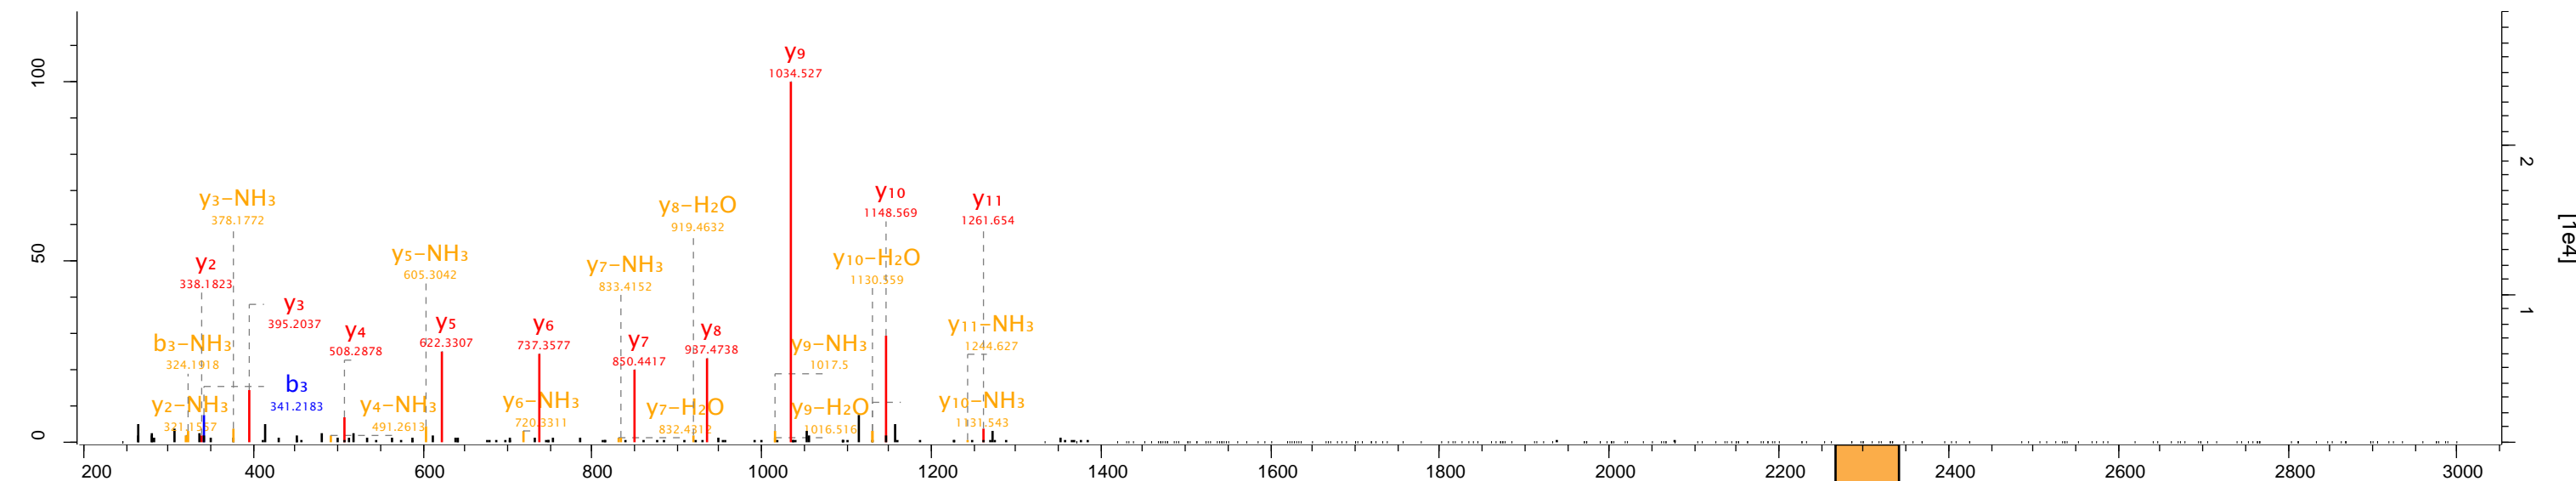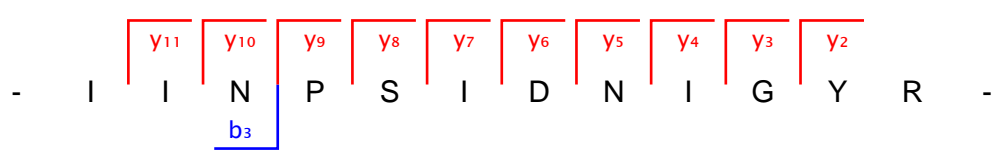

Raw file 2014-10-22\_CL04\_Embx2dil\_4Hz Scan 5782 Method TOF; CID Score 116.38 m/z 840.14

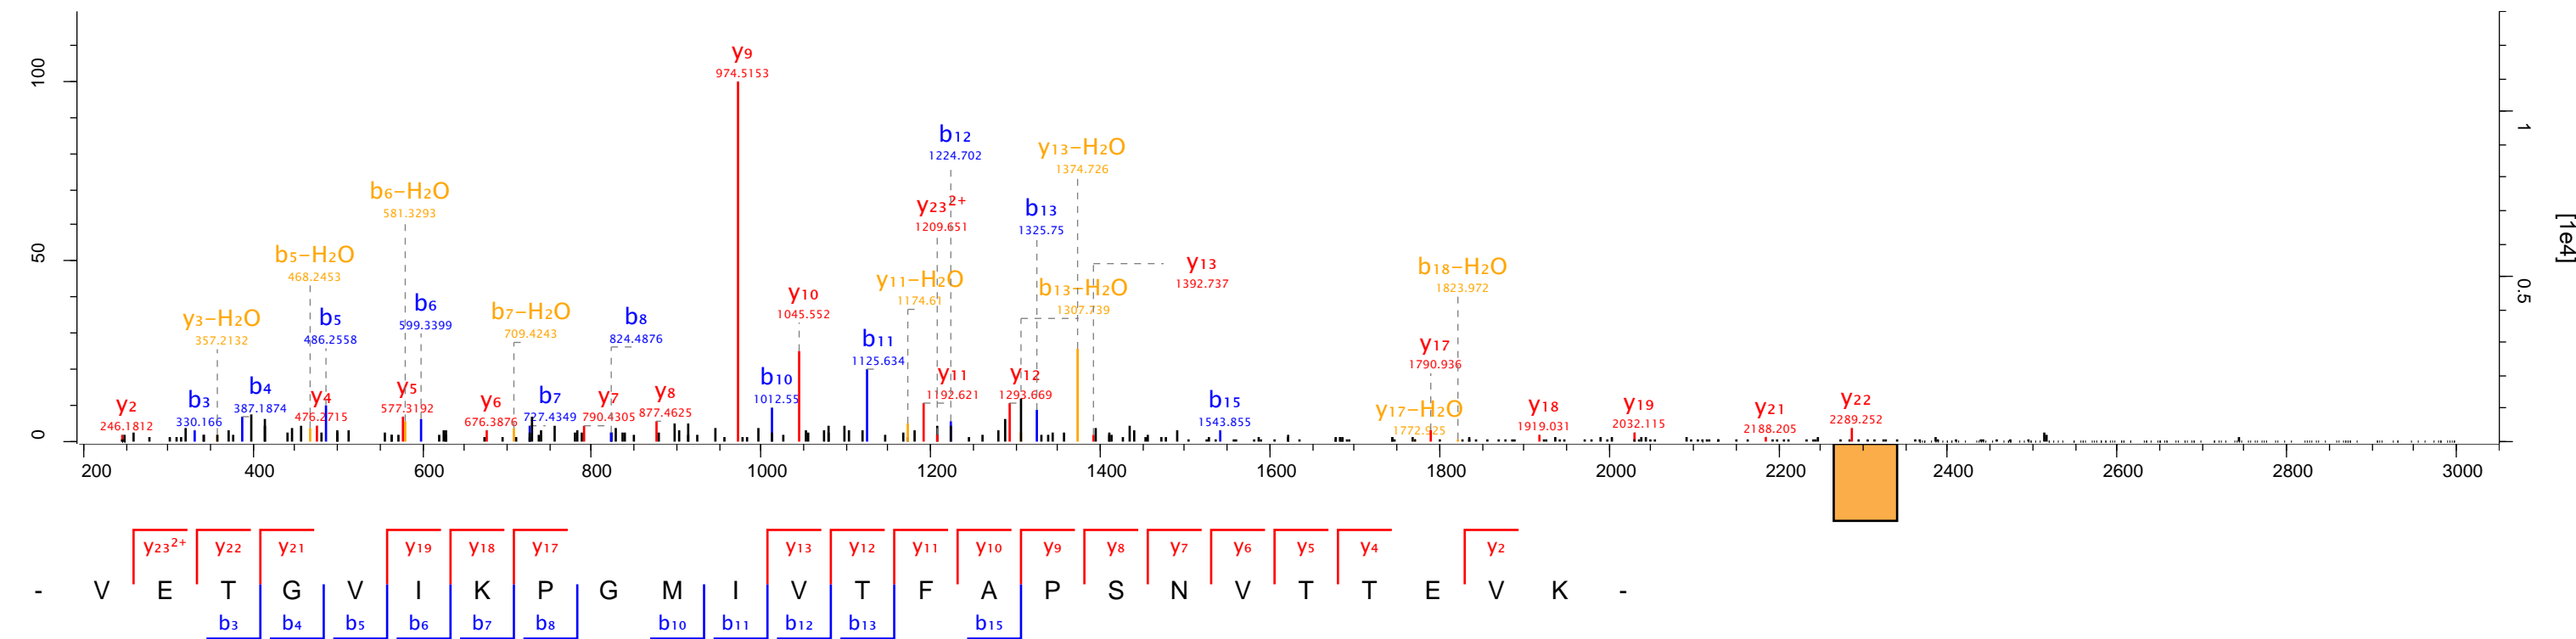

Spectral Annotation for Single-Peptide IDs in 16-cell Embryo using qQ-TOF



Raw file: 2014-10-22\_CL04\_Embx2dil\_4Hz  
 Scan: 5844 Method: TOF; CID Score: 44.43 m/z: 717.84

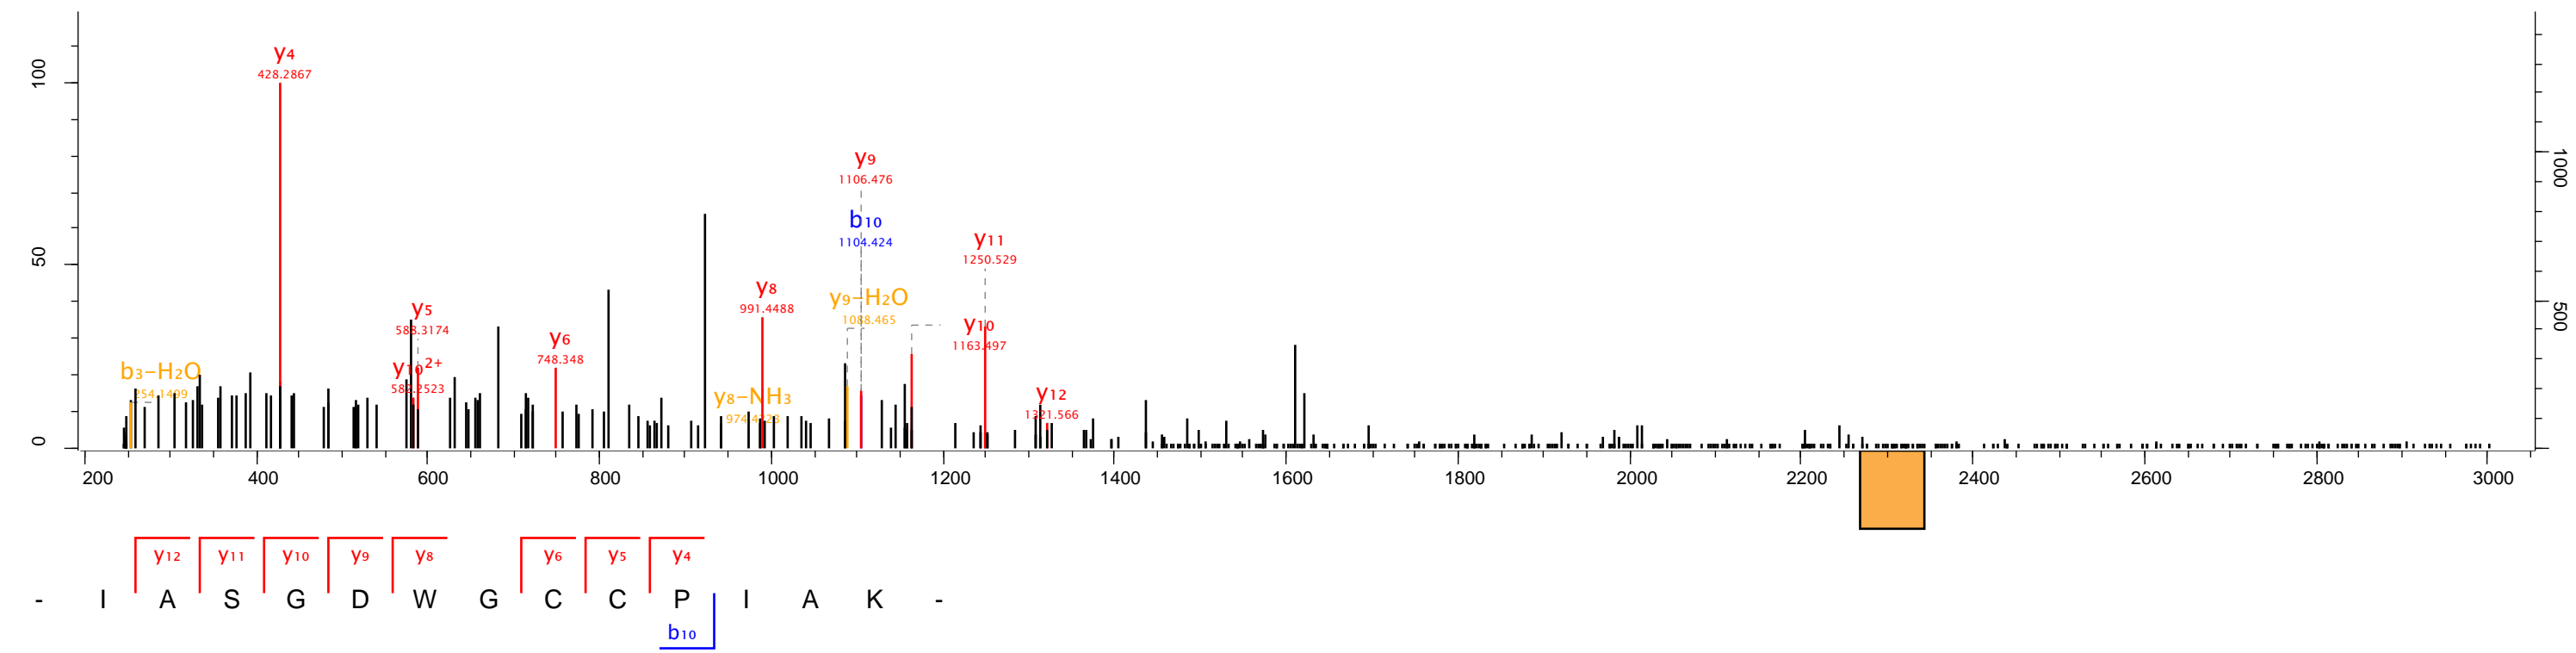

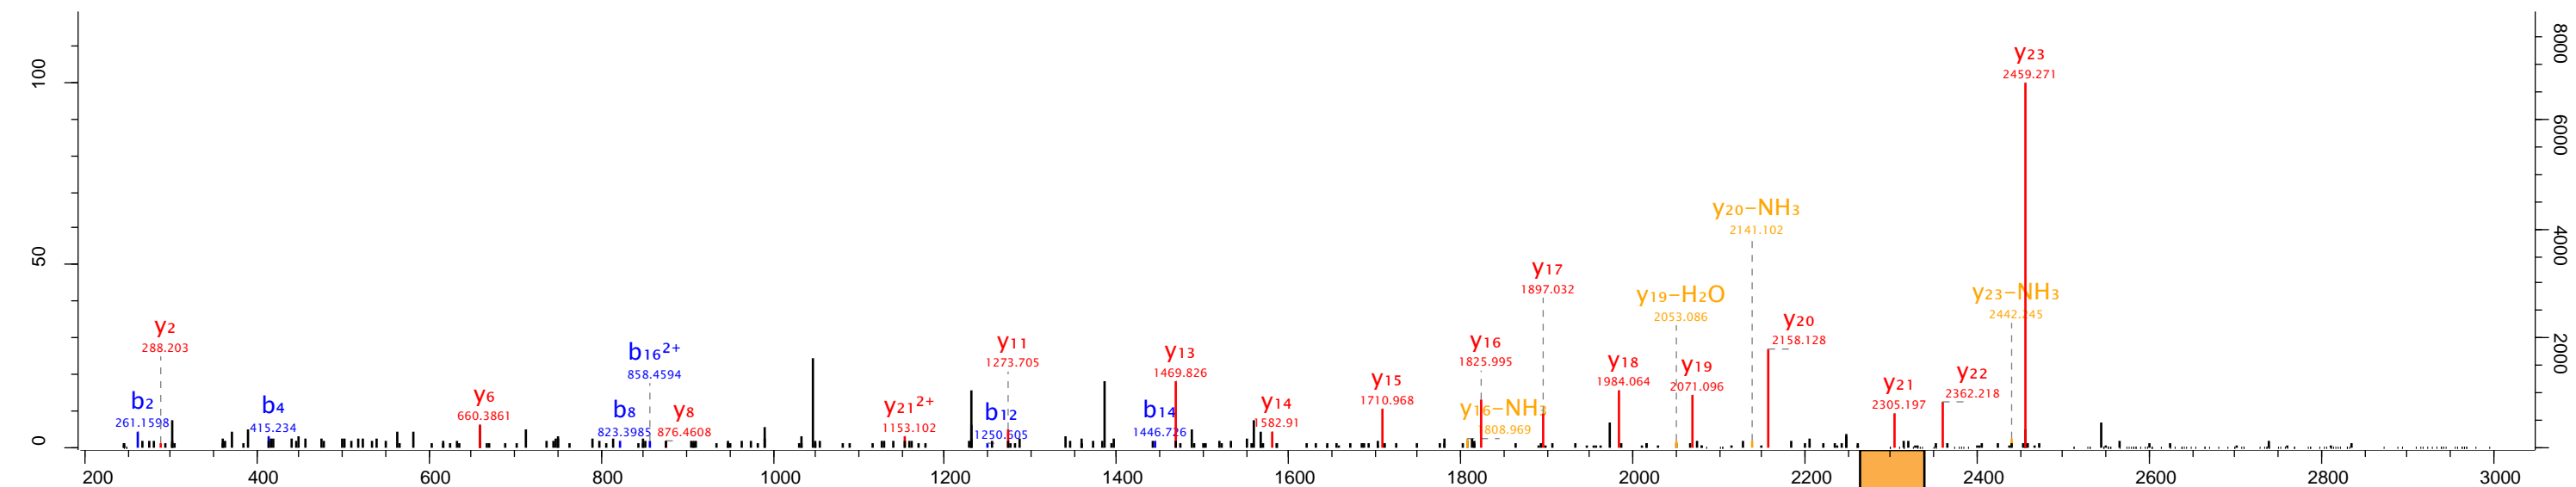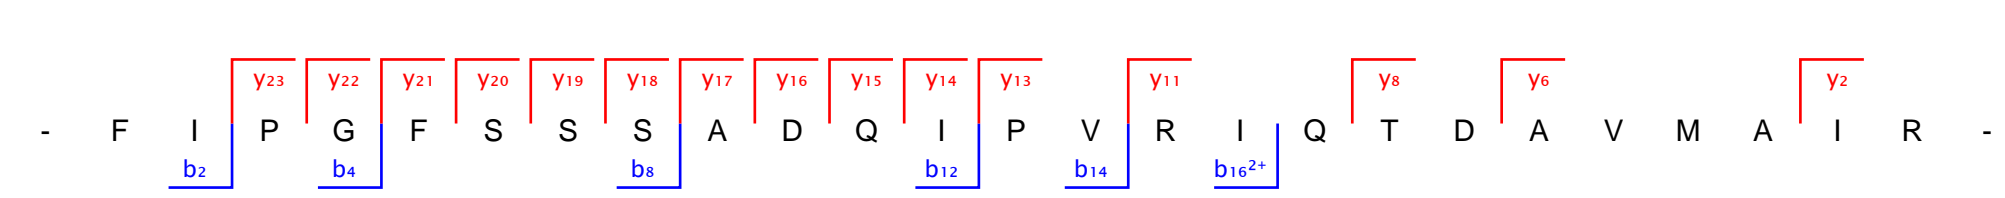

Raw file 2014-10-22\_CL04\_Embx2dil\_4Hz Scan 6014 Method TOF; CID Score 161.21 m/z 808.42

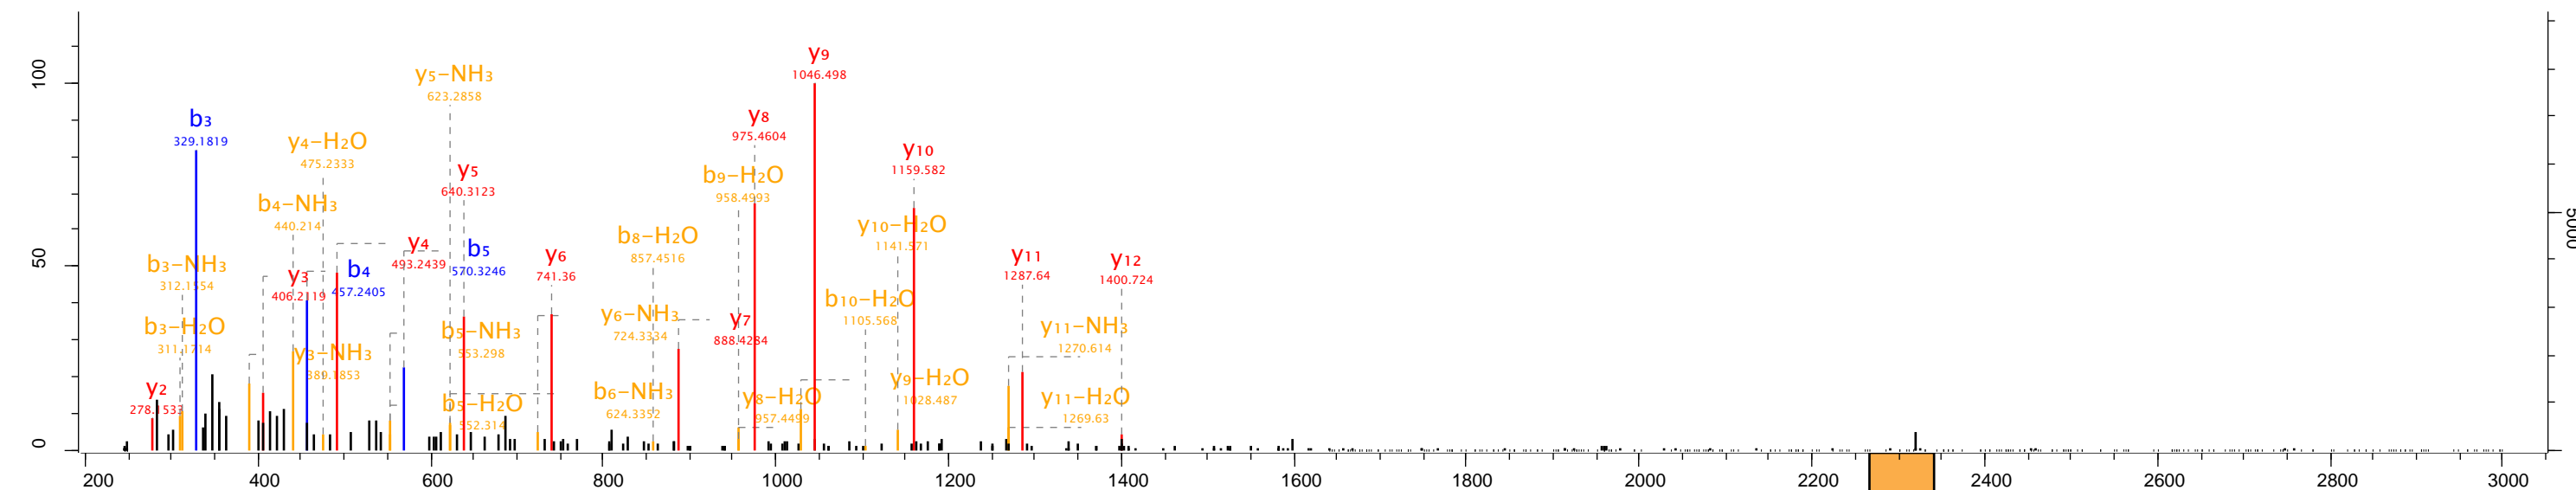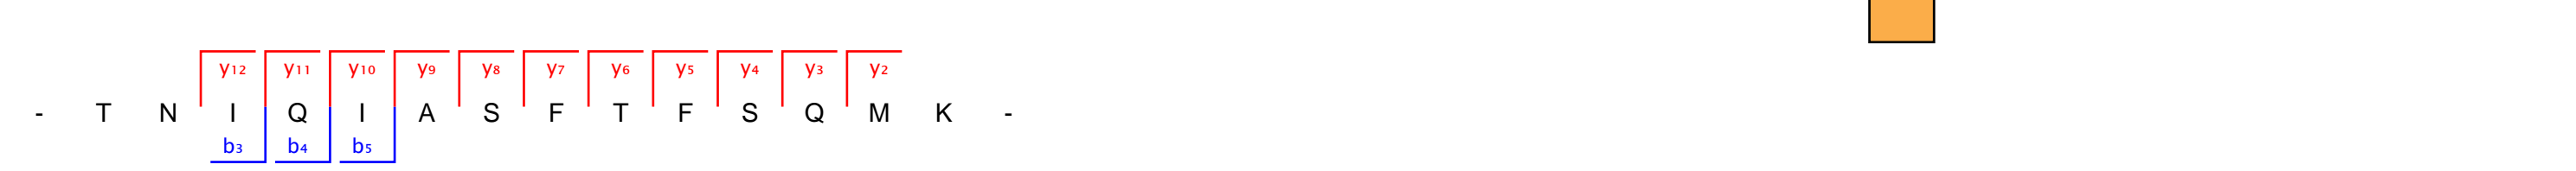

Spectral Annotation for Single-Peptide IDs in 16-cell Embryo using qQ-TOF

Raw file: 2014-10-22\_CL04\_Embx2dil\_4Hz  
 Scan: 6038 Method: TOF; CID Score: 35.04 m/z: 807.44

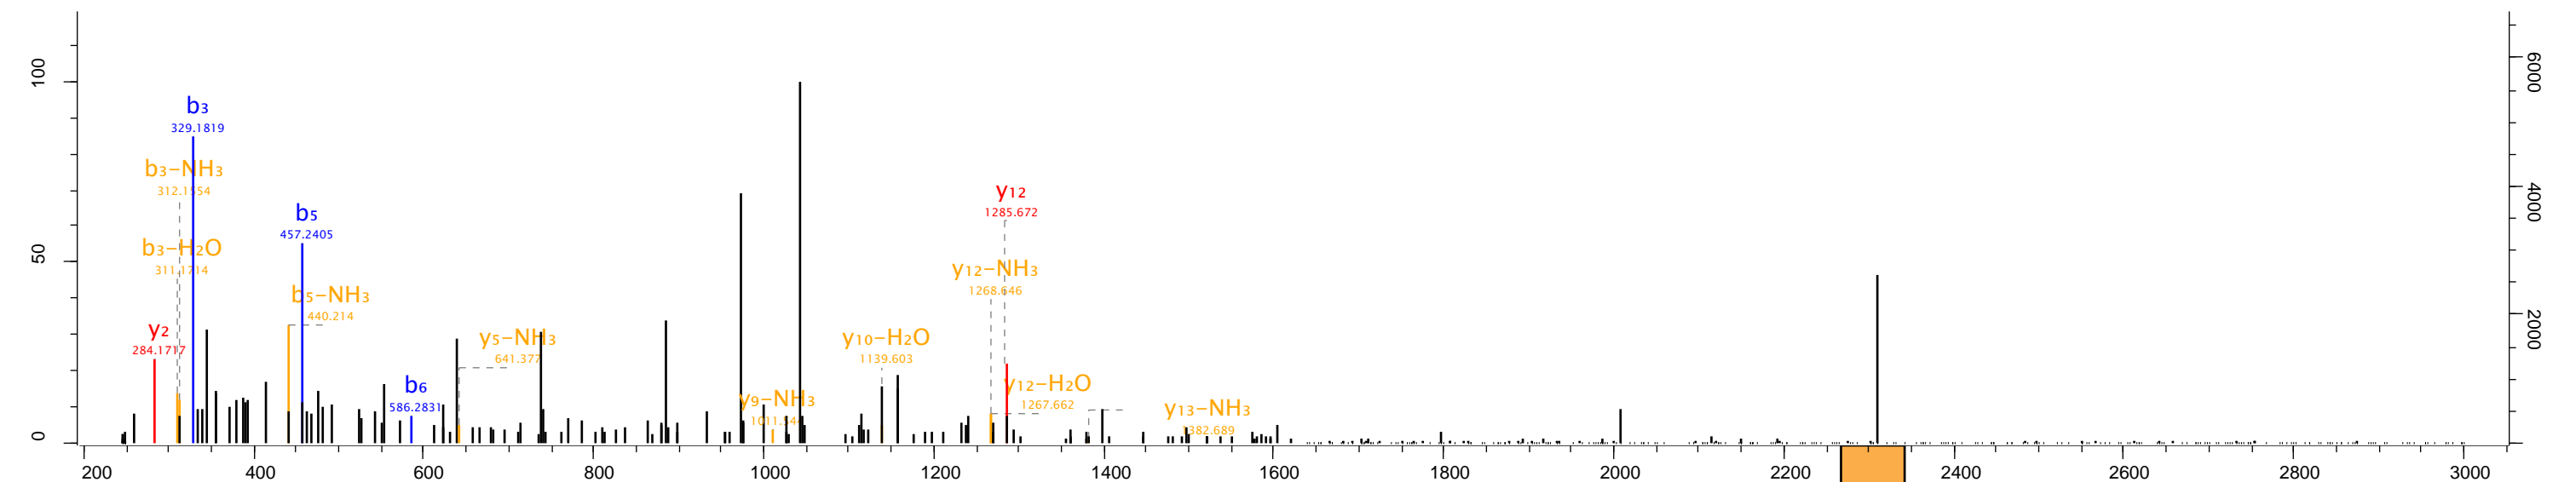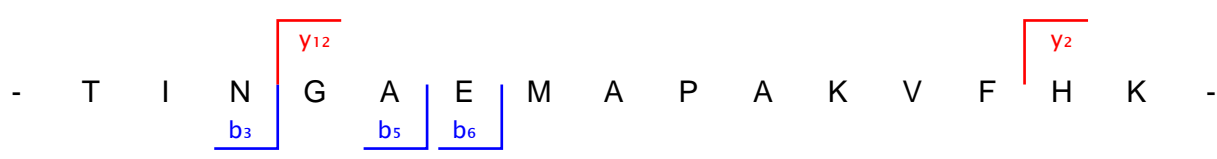

Spectral Annotation for Single-Peptide IDs in 16-cell Embryo using qQ-TOF

Raw file: 2014-10-22\_CL04\_Embx2dil\_4Hz  
 Scan: 6092    Method: TOF; CID    Score: 34.93    m/z: 834.41

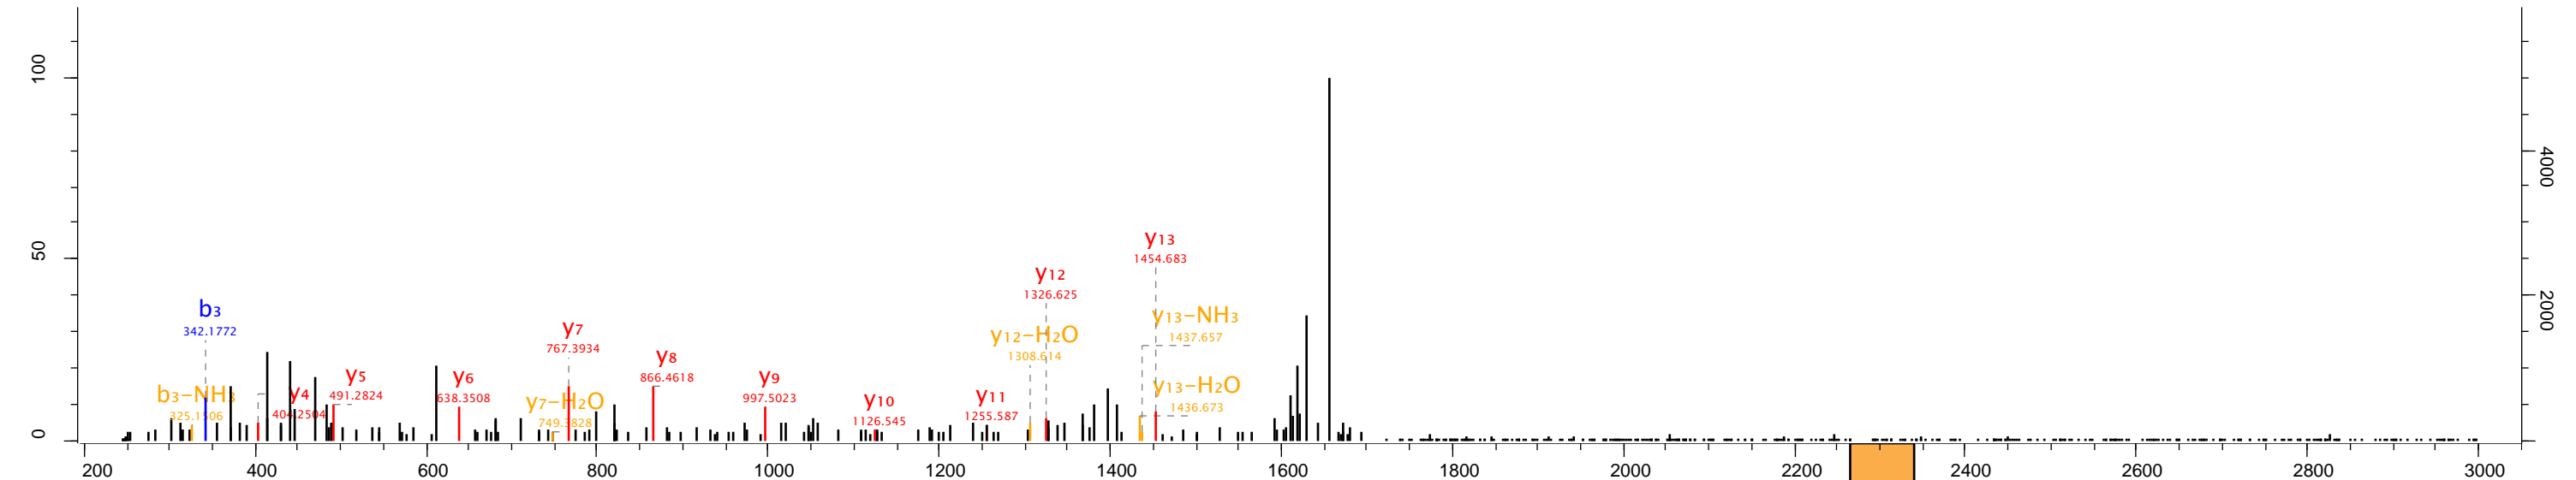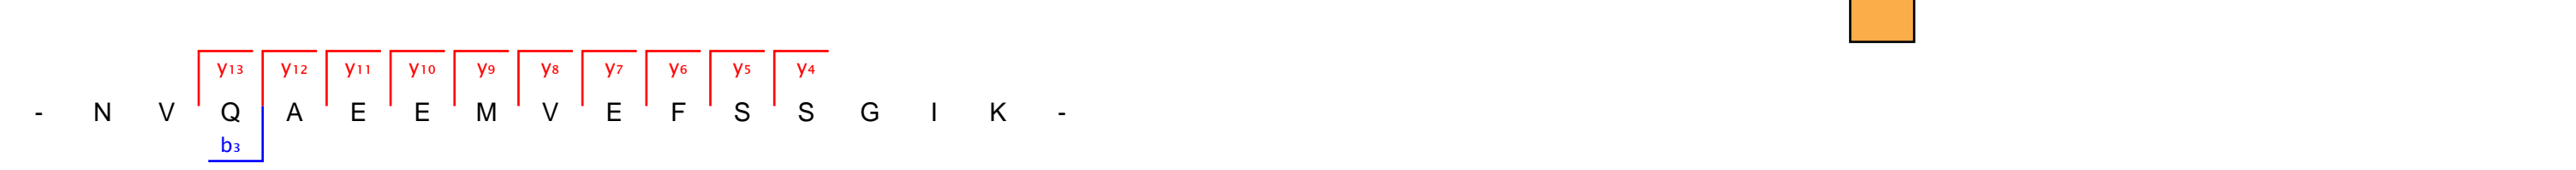



Raw file: 2014-10-22\_CL04\_Embx2dil\_4Hz  
 Scan: 6095 Method: TOF; CID Score: 124.62 m/z: 813.44

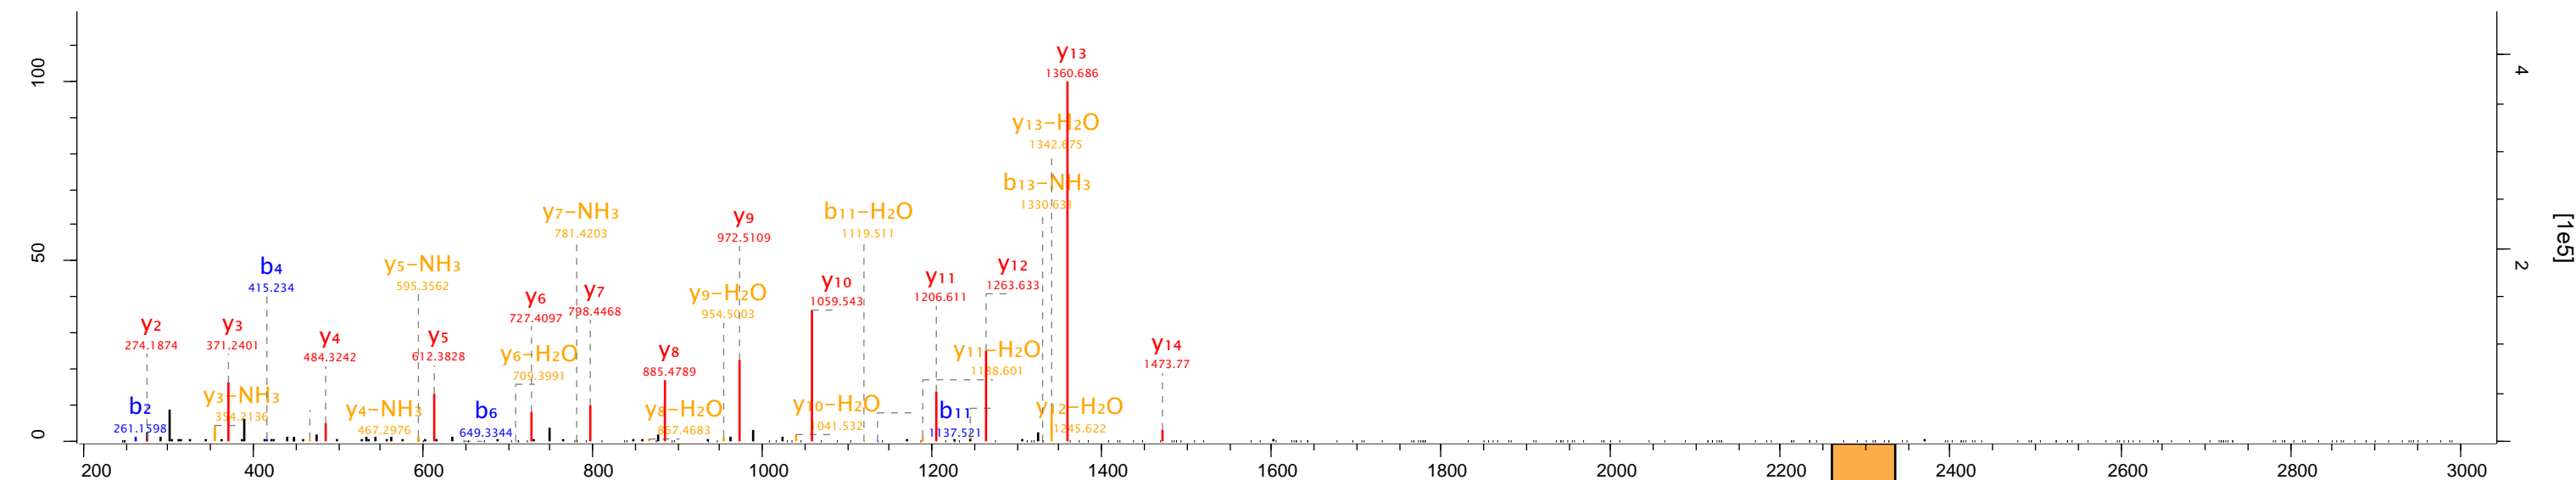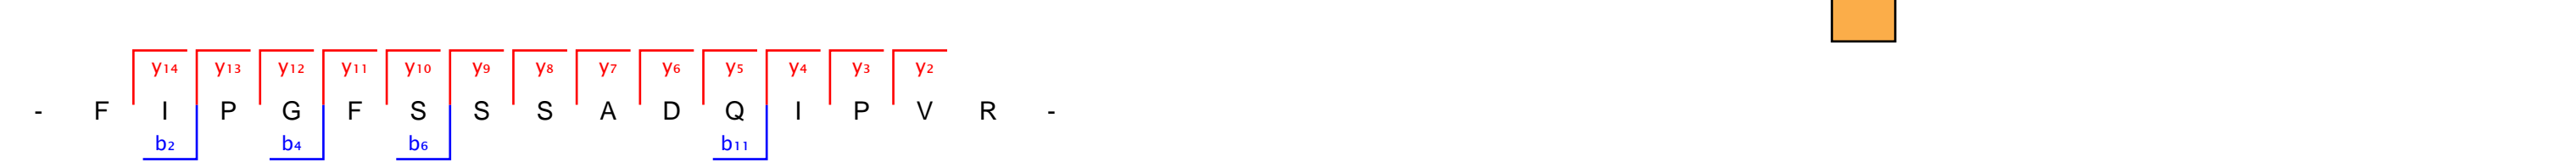

Spectral Annotation for Single-Peptide IDs in 16-cell Embryo using qQ-TOF

Raw file: 2014-10-22\_CL04\_Embx2dil\_4Hz  
 Scan: 6119 Method: TOF; CID Score: 38.38 m/z: 773.94

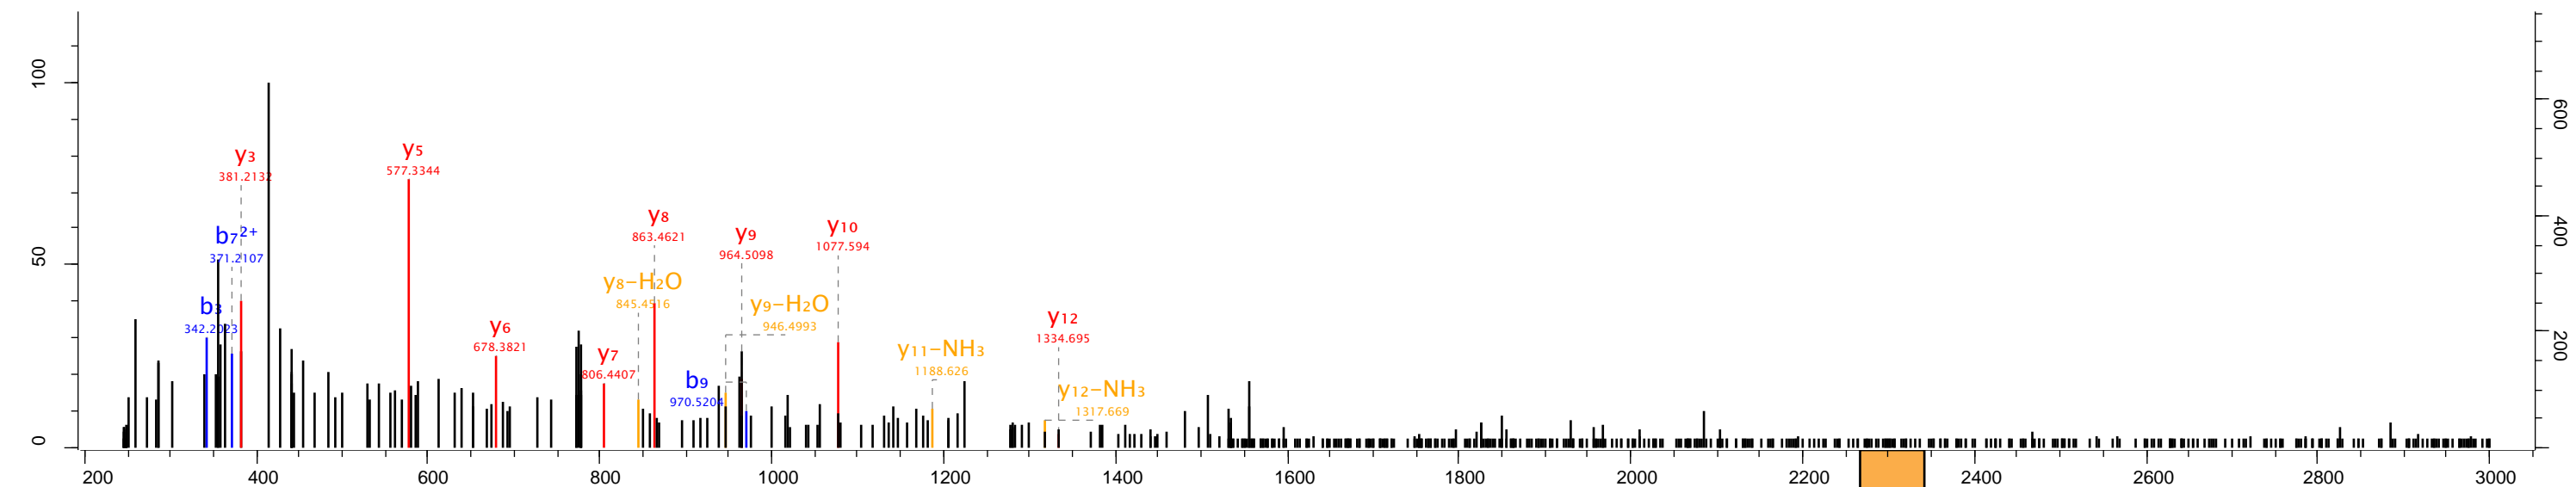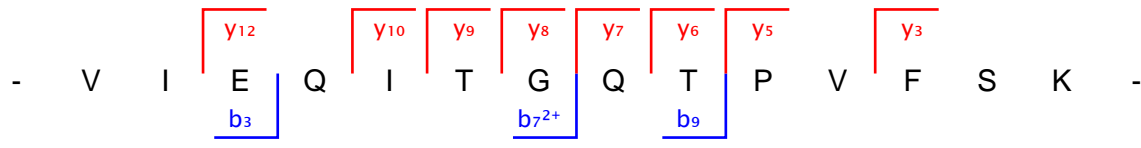

Raw file: 2014-10-22\_CL04\_Embx2dil\_4Hz  
 Scan: 6150 Method: TOF; CID Score: 45.44 m/z: 795.42

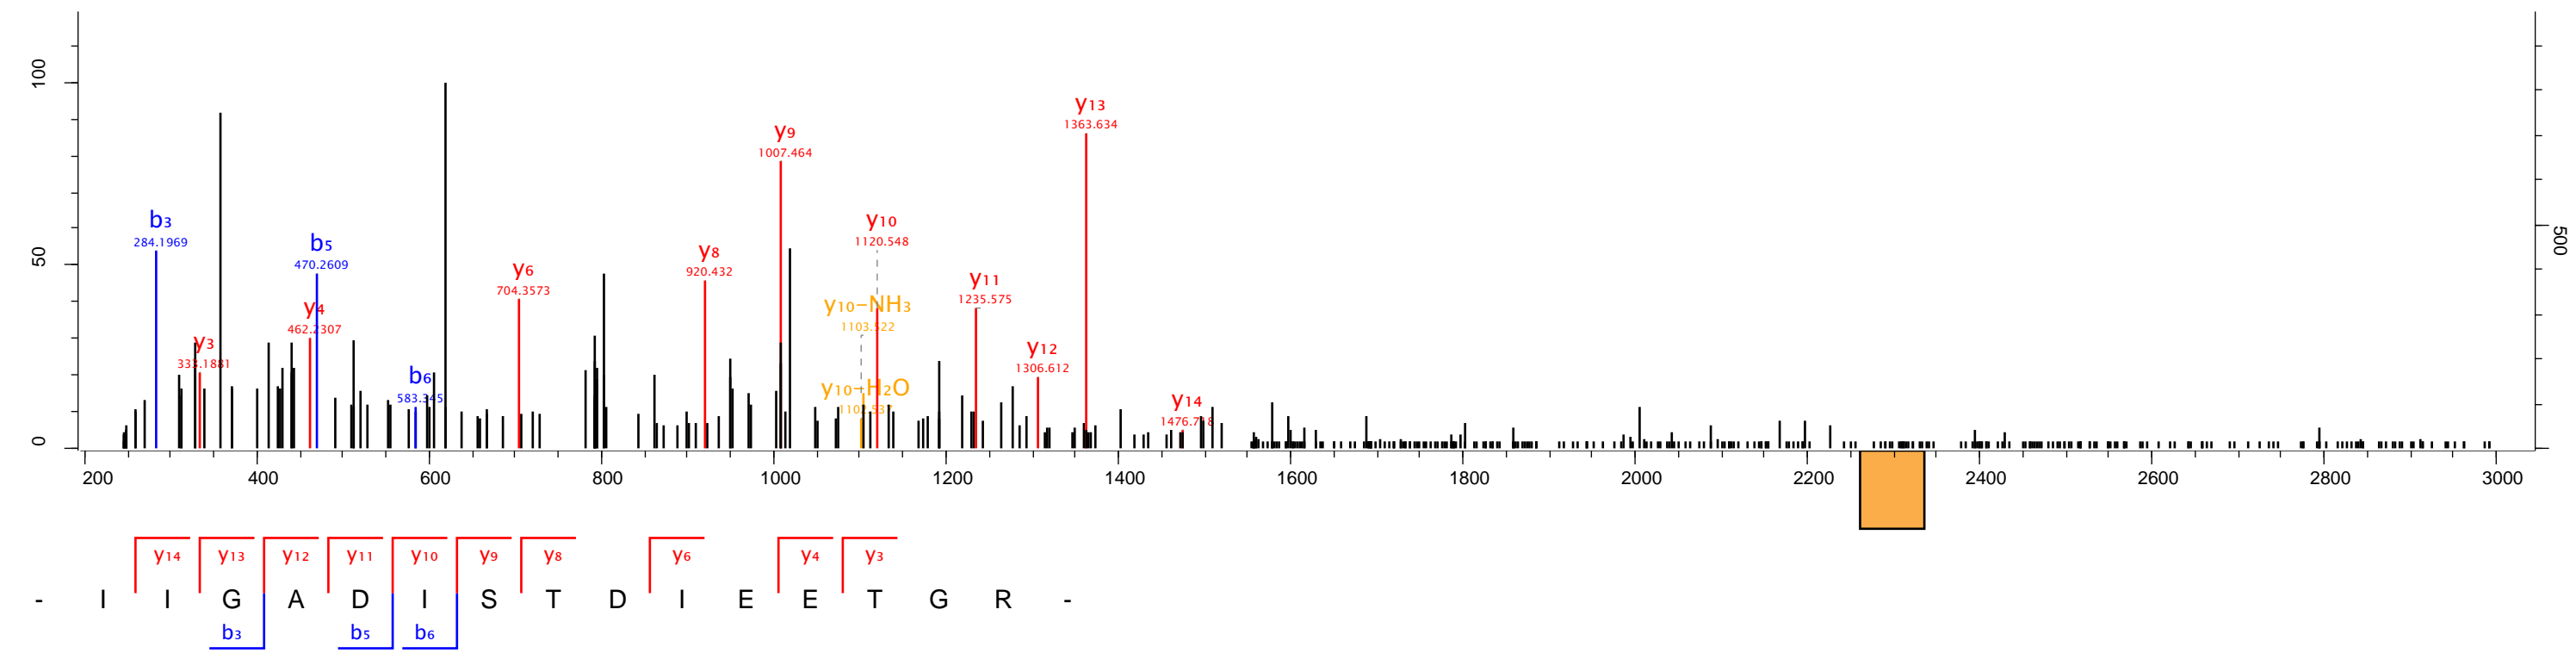

Spectral Annotation for Single-Peptide IDs in 16-cell Embryo using qQ-TOF

Raw file: 2014-10-22\_CL04\_Embx2dil\_4Hz  
 Scan: 6177 Method: TOF; CID Score: 76.57 m/z: 1130.9

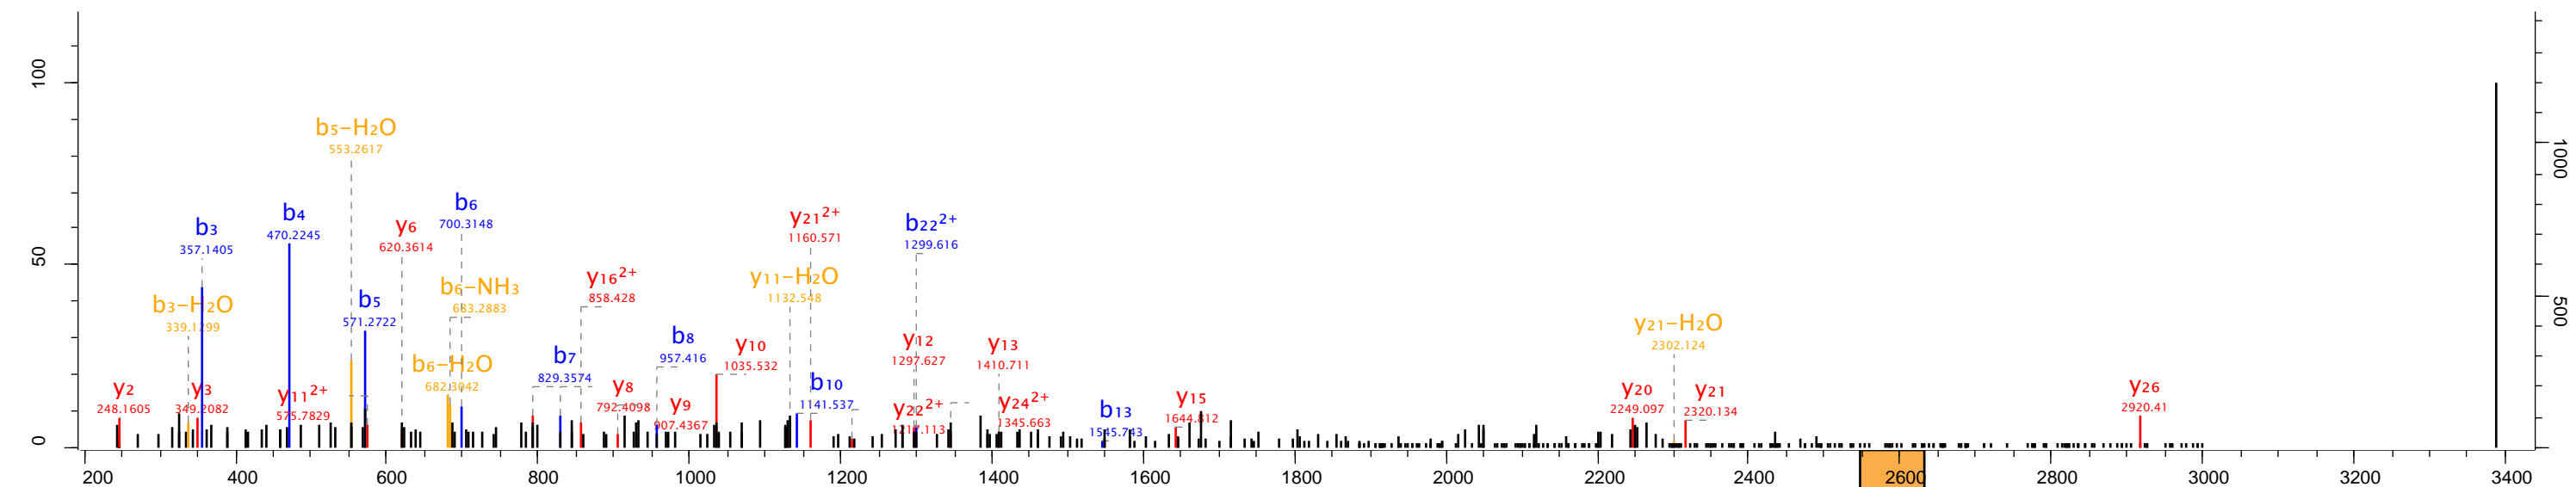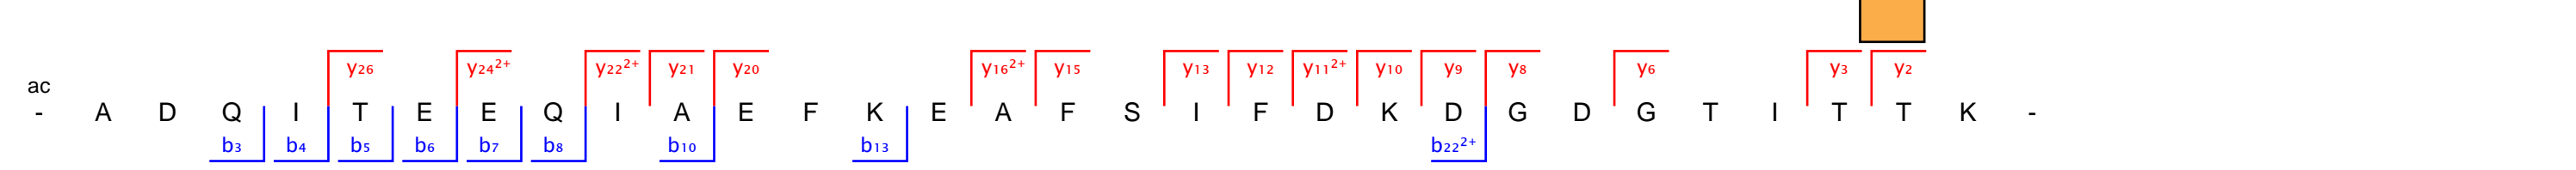

Spectral Annotation for Single-Peptide IDs in 16-cell Embryo using qQ-TOF

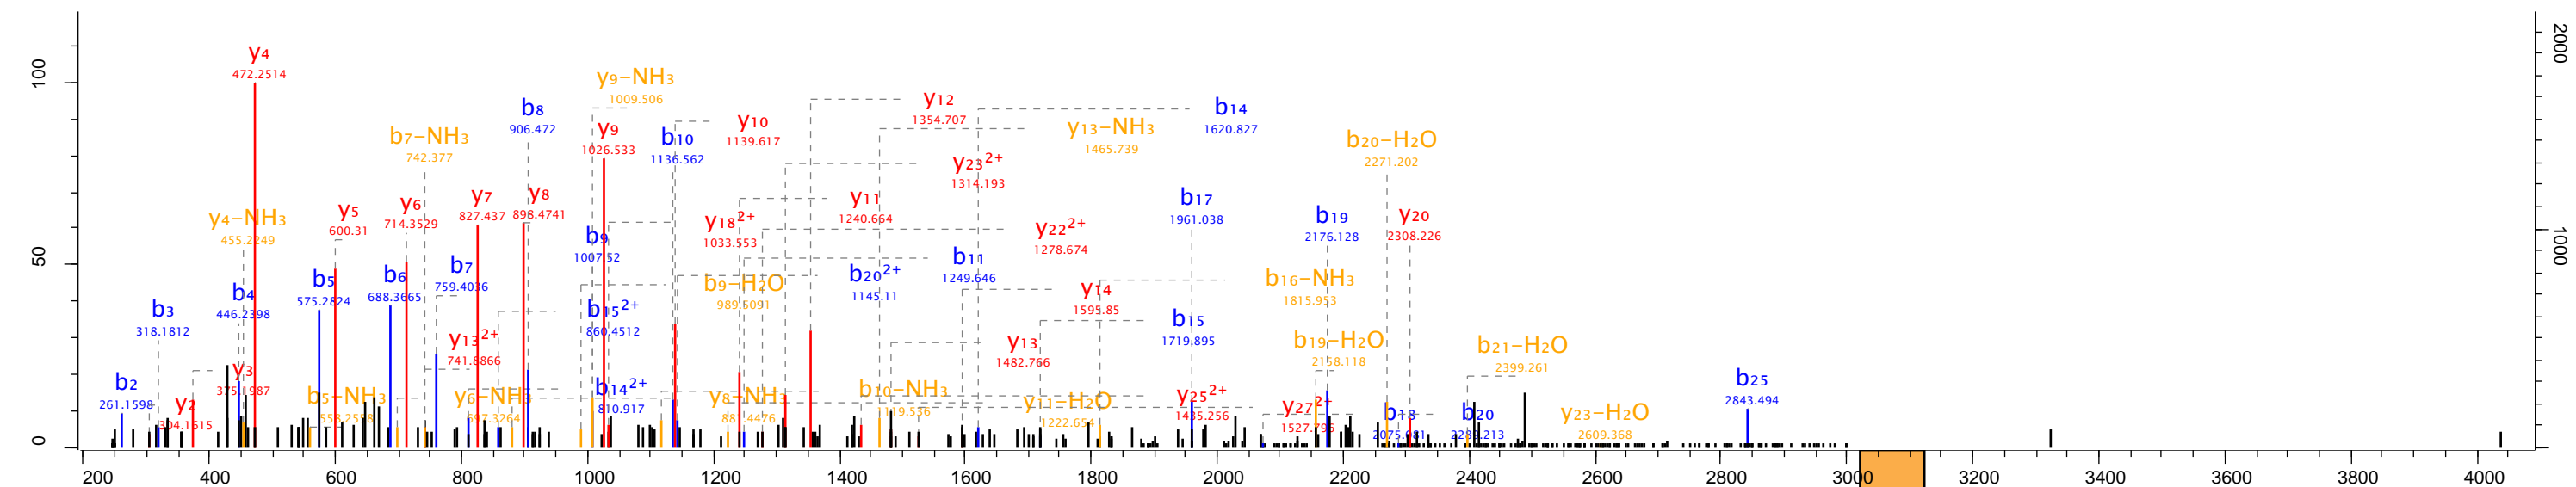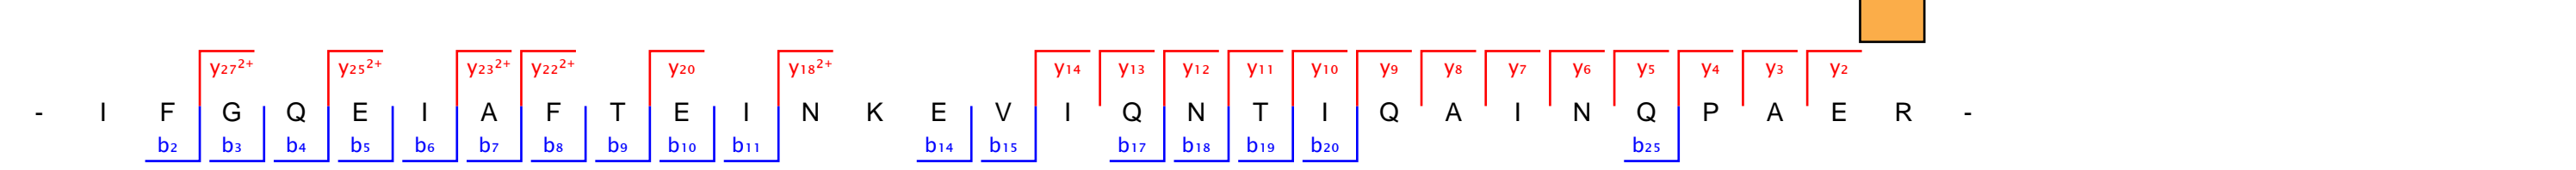

Raw file 2014-10-22\_CL04\_Embx2dil\_4Hz  
 Scan 6189 Method TOF; CID Score 71.29 m/z 844.98

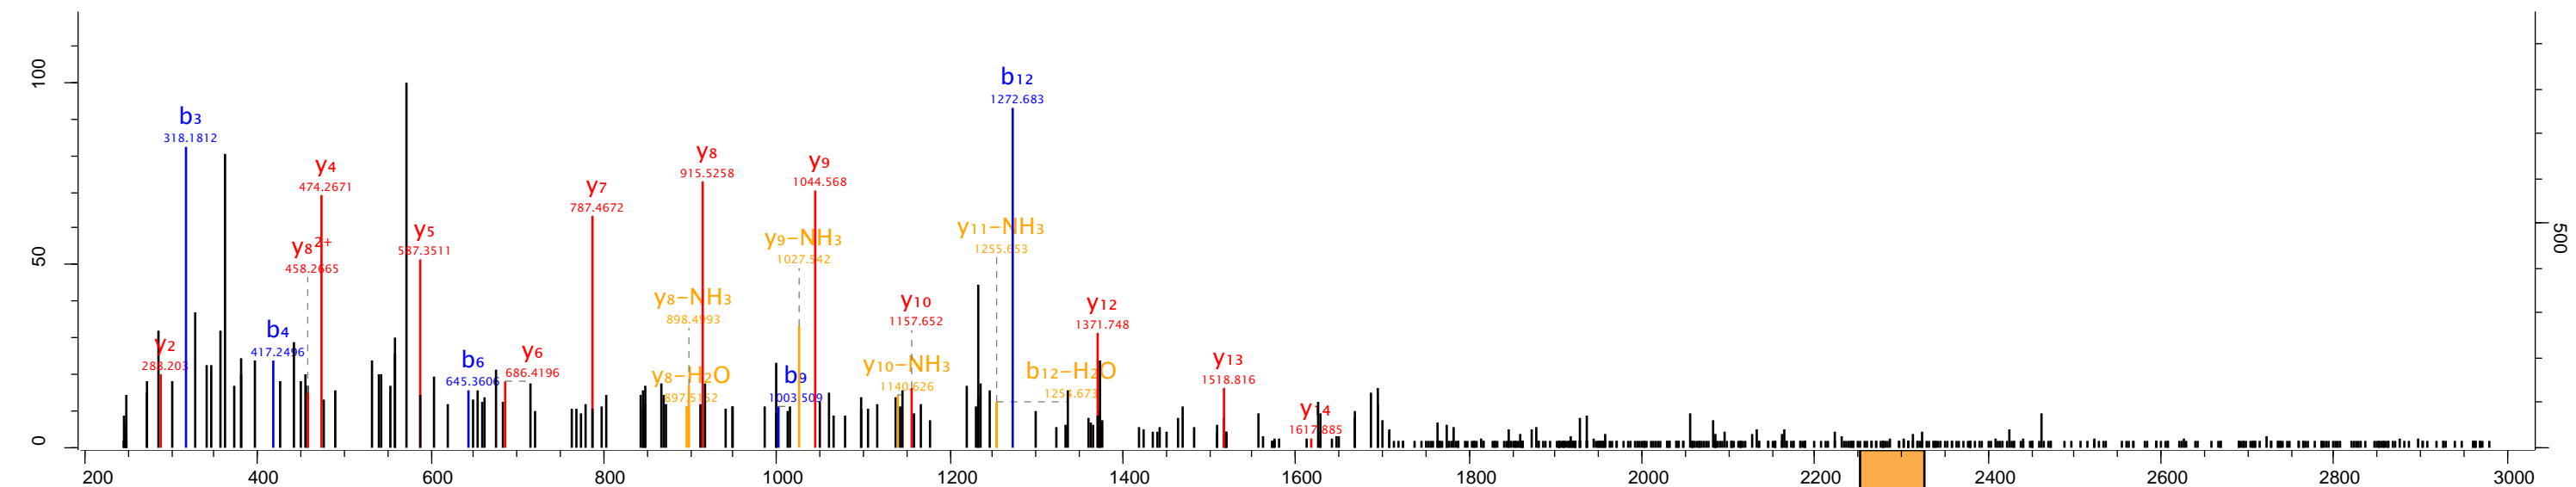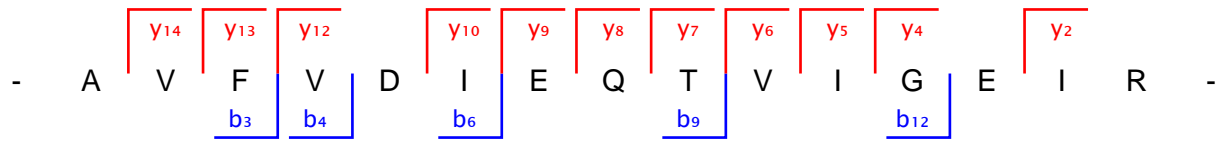

Spectral Annotation for Single-Peptide IDs in 16-cell Embryo using qQ-TOF

Raw file: 2014-10-22\_CL04\_Embx2dil\_4Hz  
 Scan: 6213 Method: TOF; CID Score: 54.28 m/z: 805.95

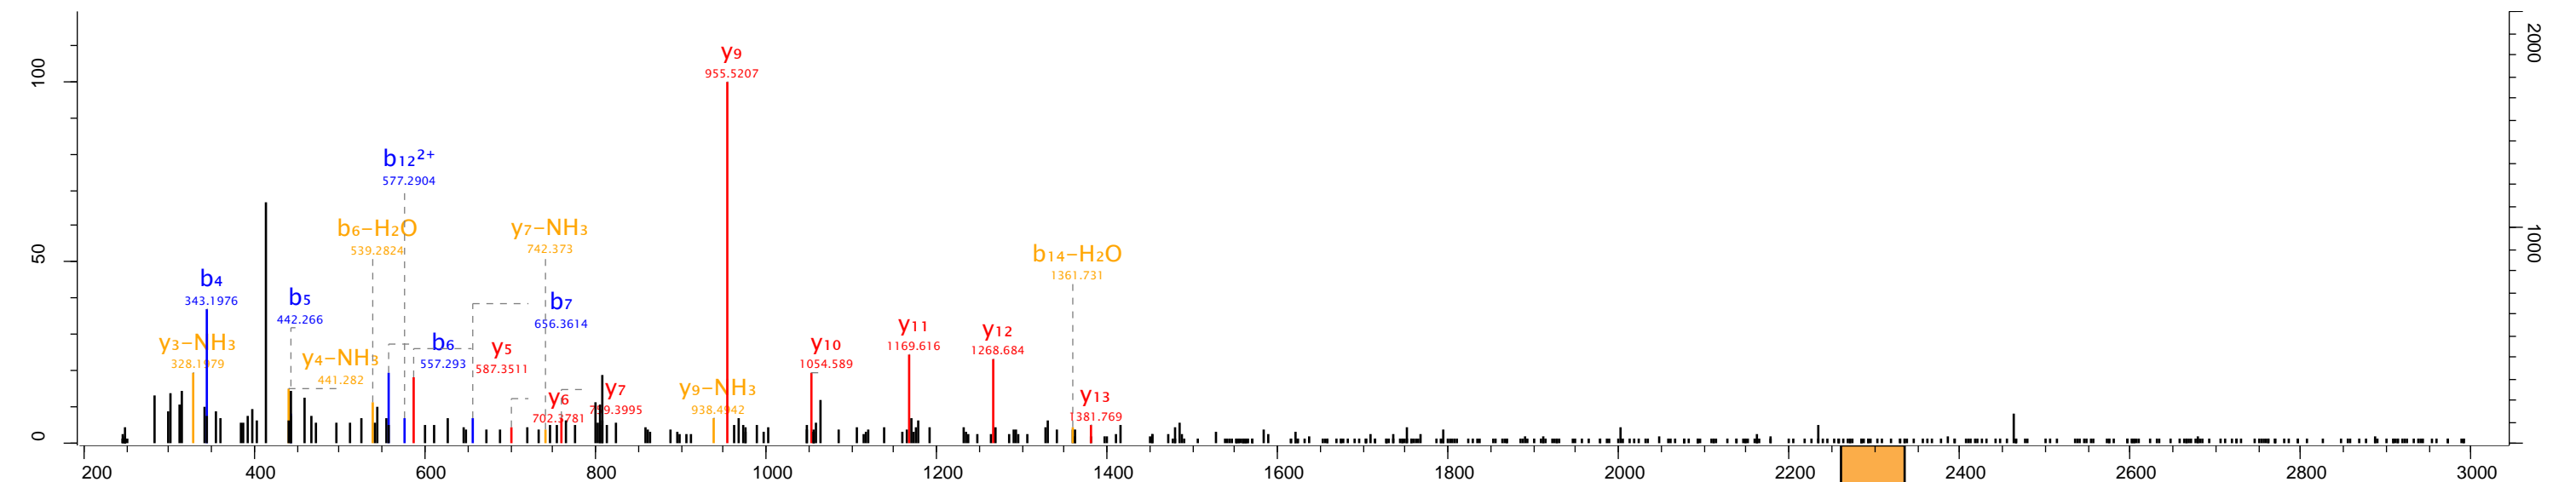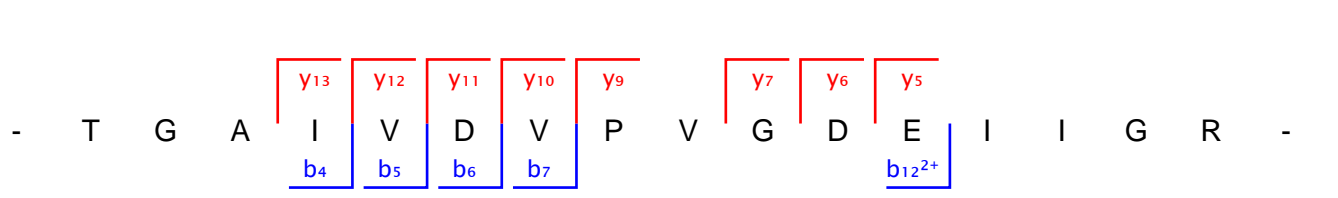

Raw file: 2014-10-22\_CL04\_Embx2dil\_4Hz  
 Scan: 6221 Method: TOF; CID Score: 138.98 m/z: 895.96

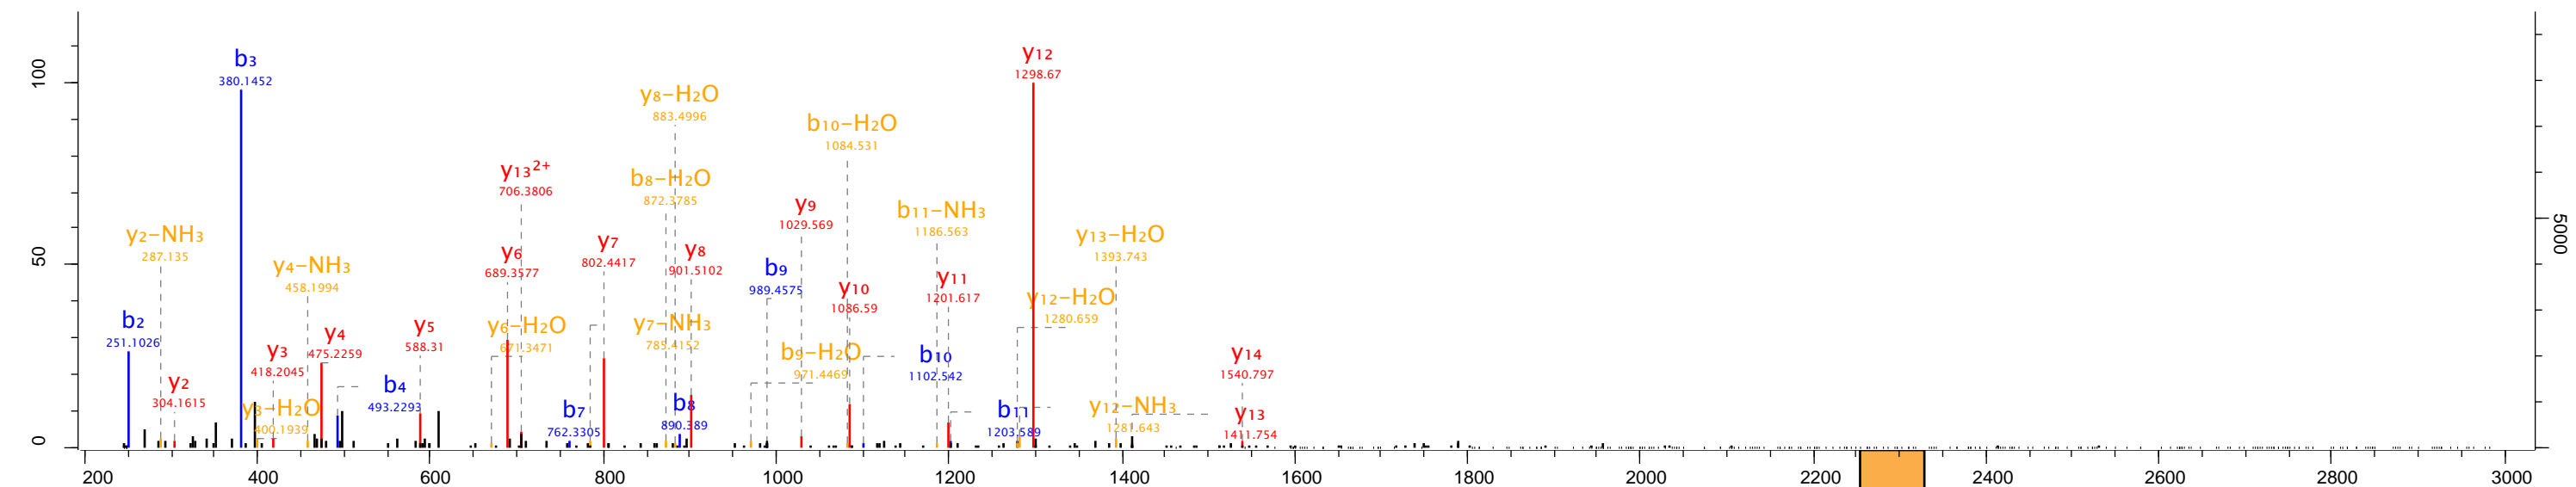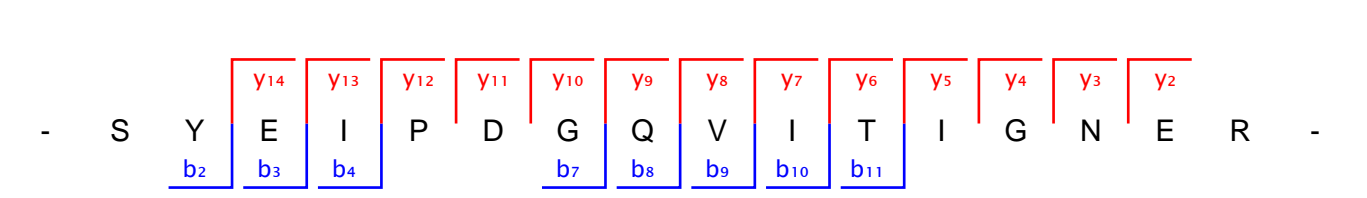

Spectral Annotation for Single-Peptide IDs in 16-cell Embryo using qQ-TOF



Raw file: 2014-10-22\_CL04\_Embx2dil\_4Hz  
 Scan: 6273 Method: TOF; CID Score: 38.89 m/z: 853.41

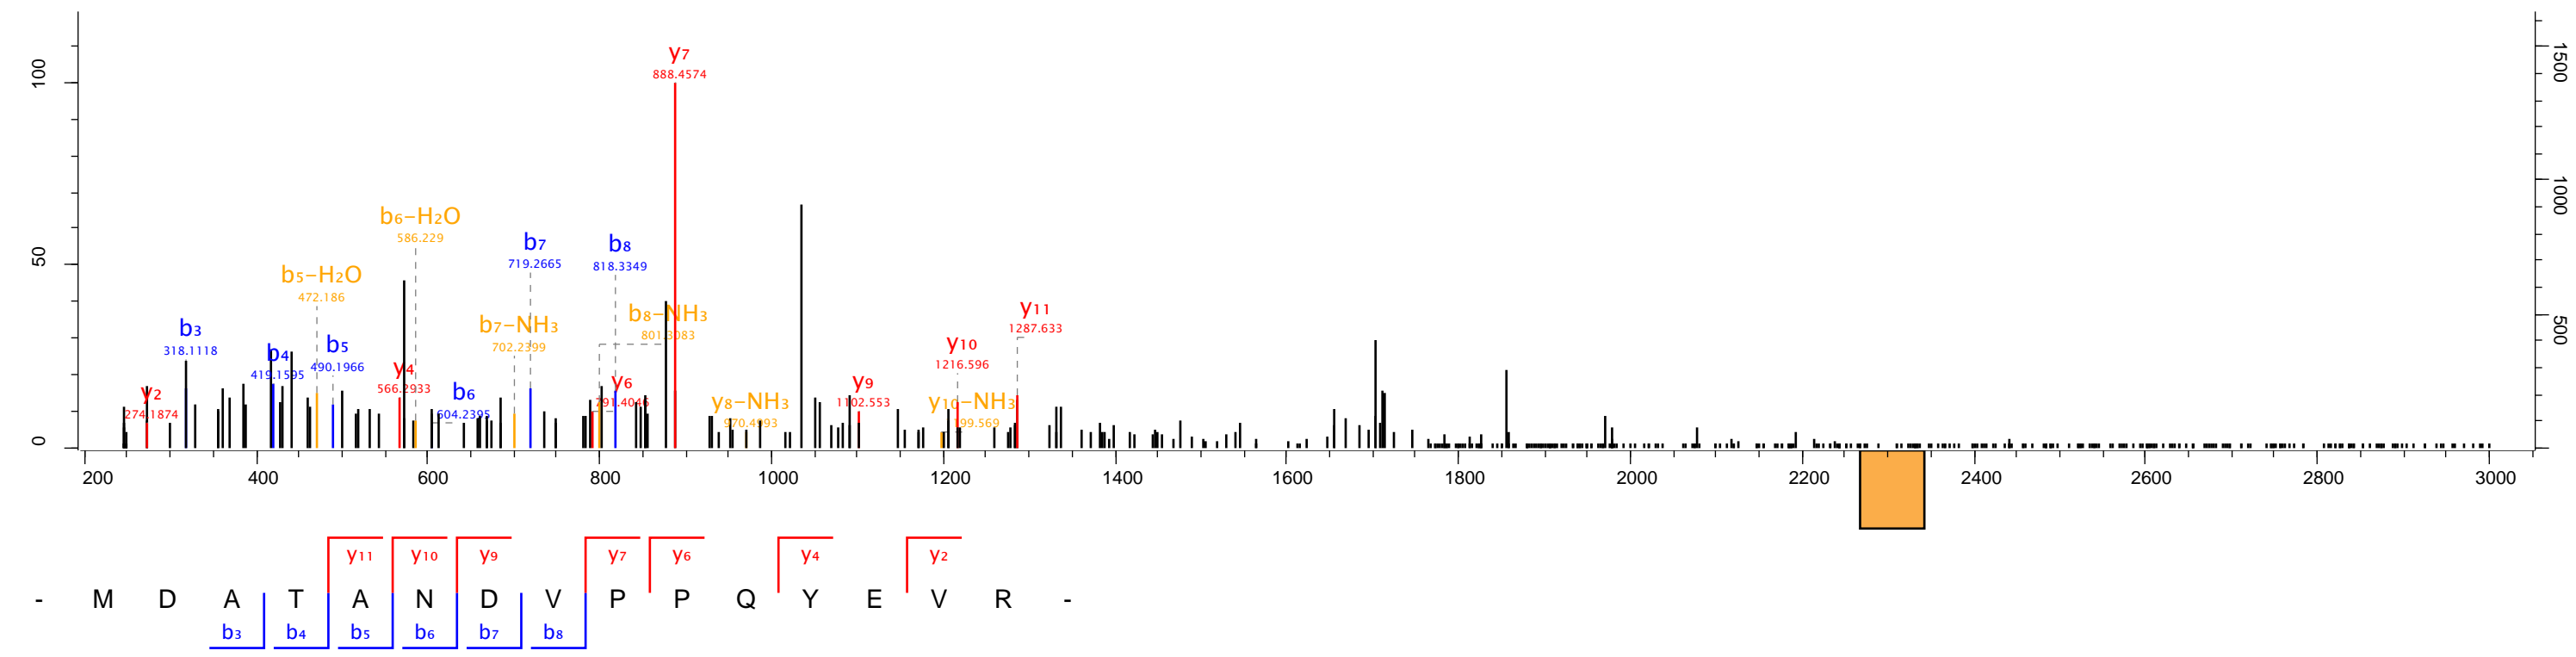

Spectral Annotation for Single-Peptide IDs in 16-cell Embryo using qQ-TOF

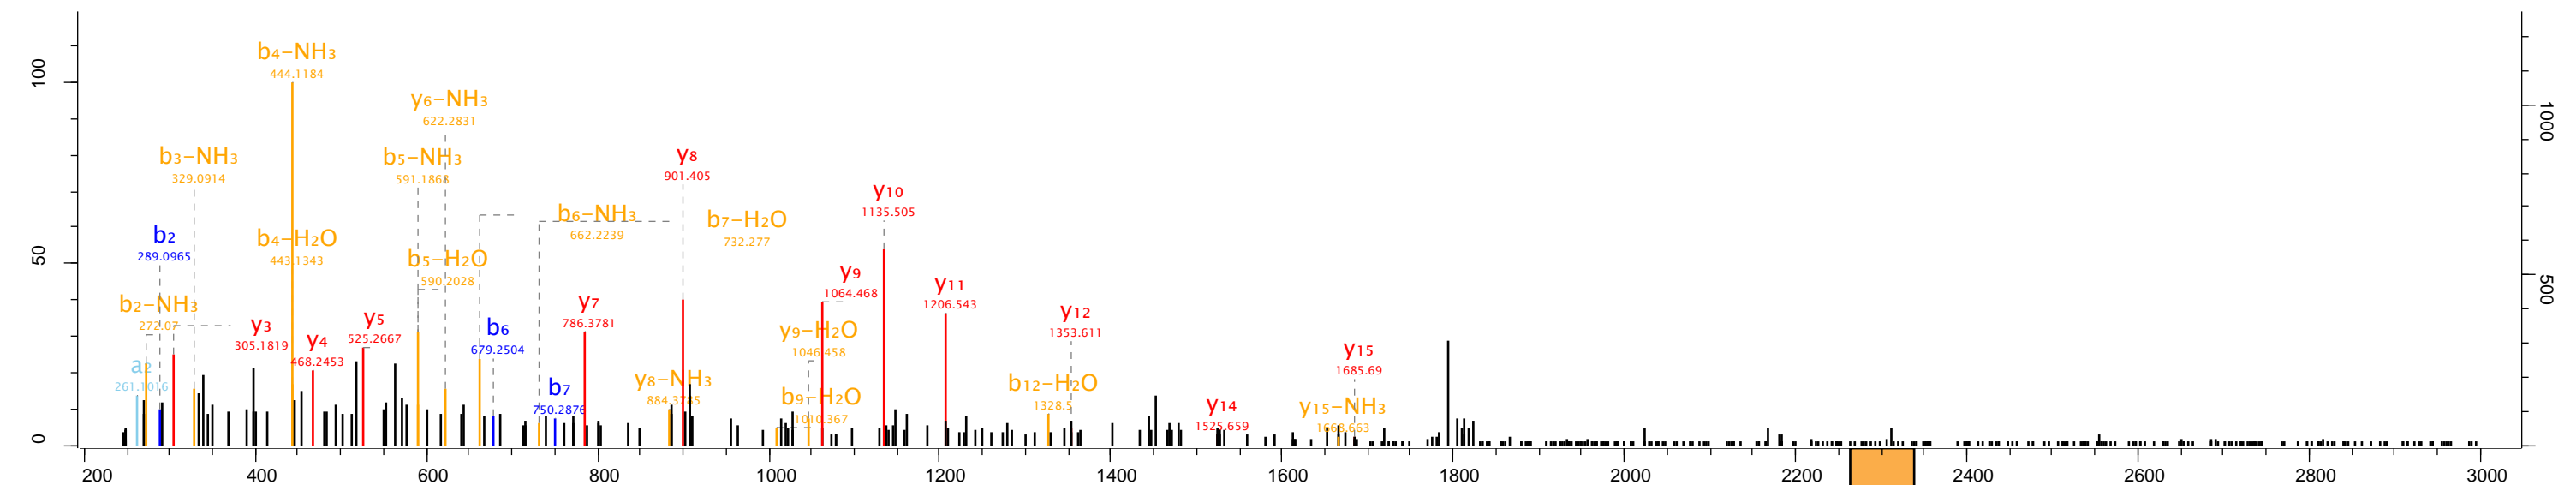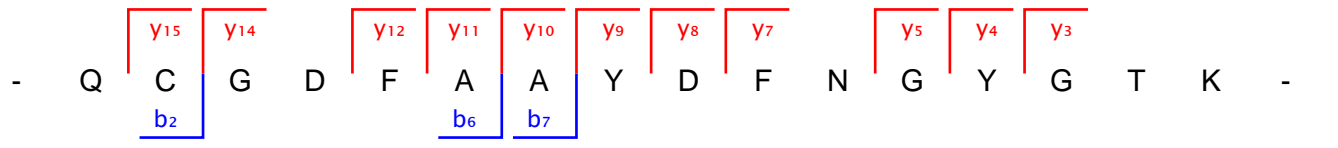

Raw file Scan Method Score m/z  
 2014-10-22\_CL04\_Embx2dil\_4Hz 6368 TOF; CID 31.14 897.56

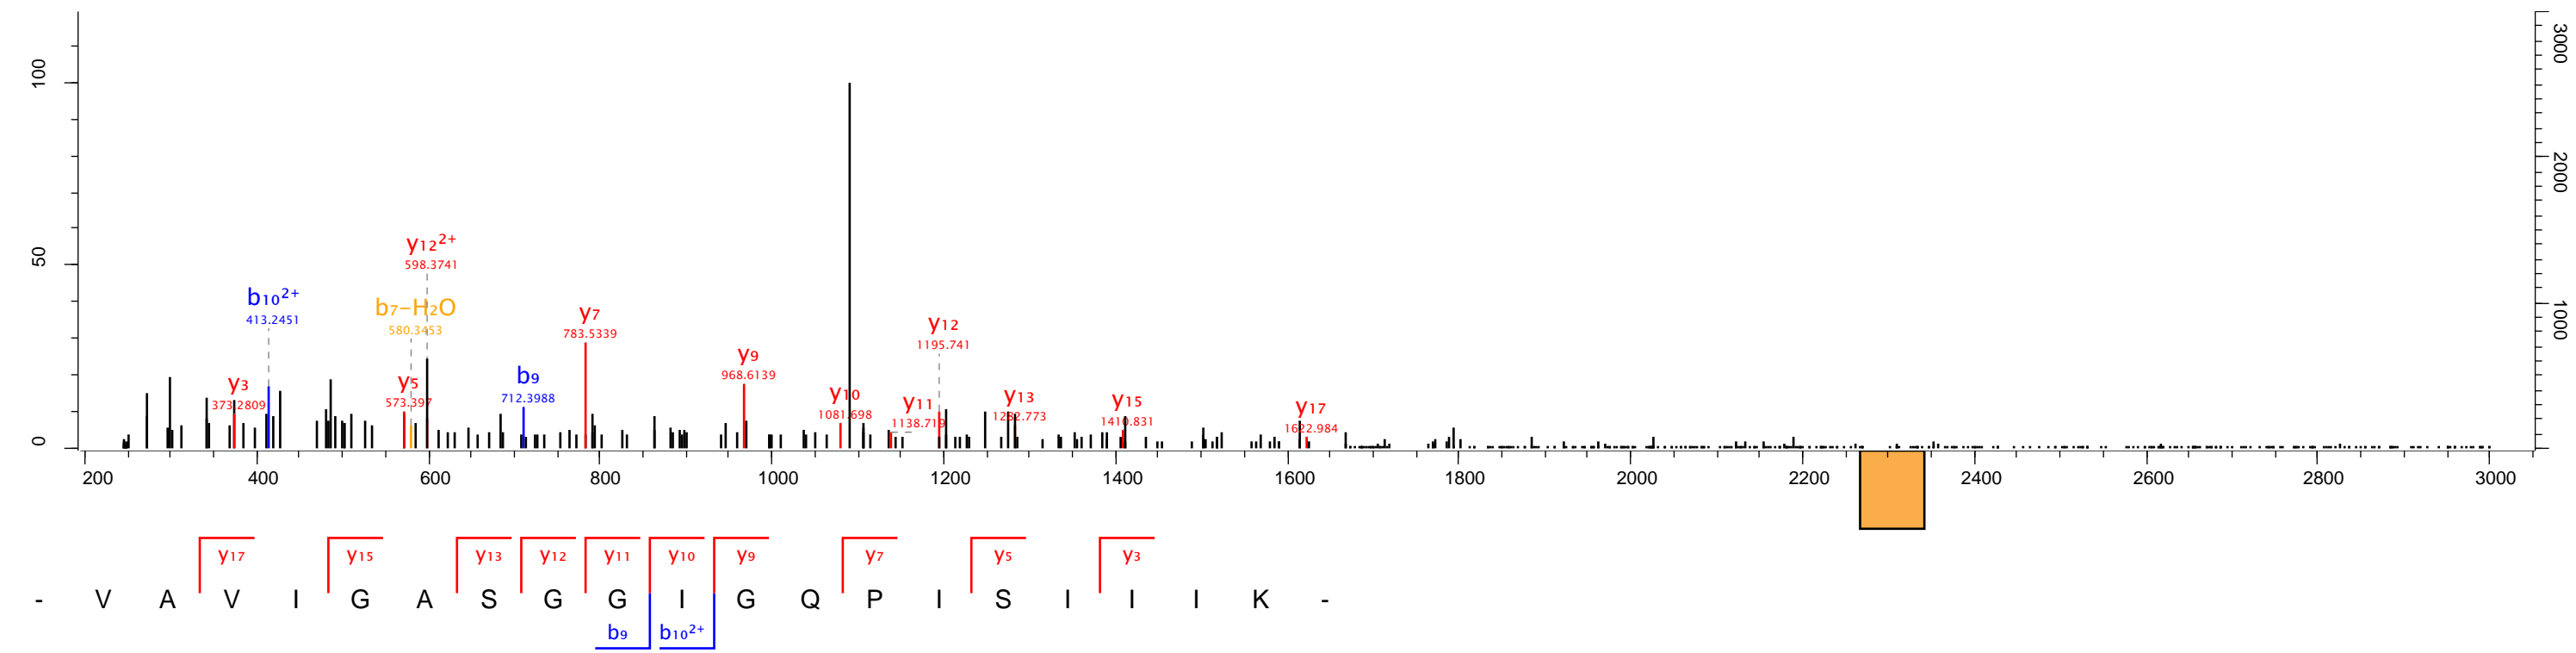

Spectral Annotation for Single-Peptide IDs in 16-cell Embryo using qQ-TOF

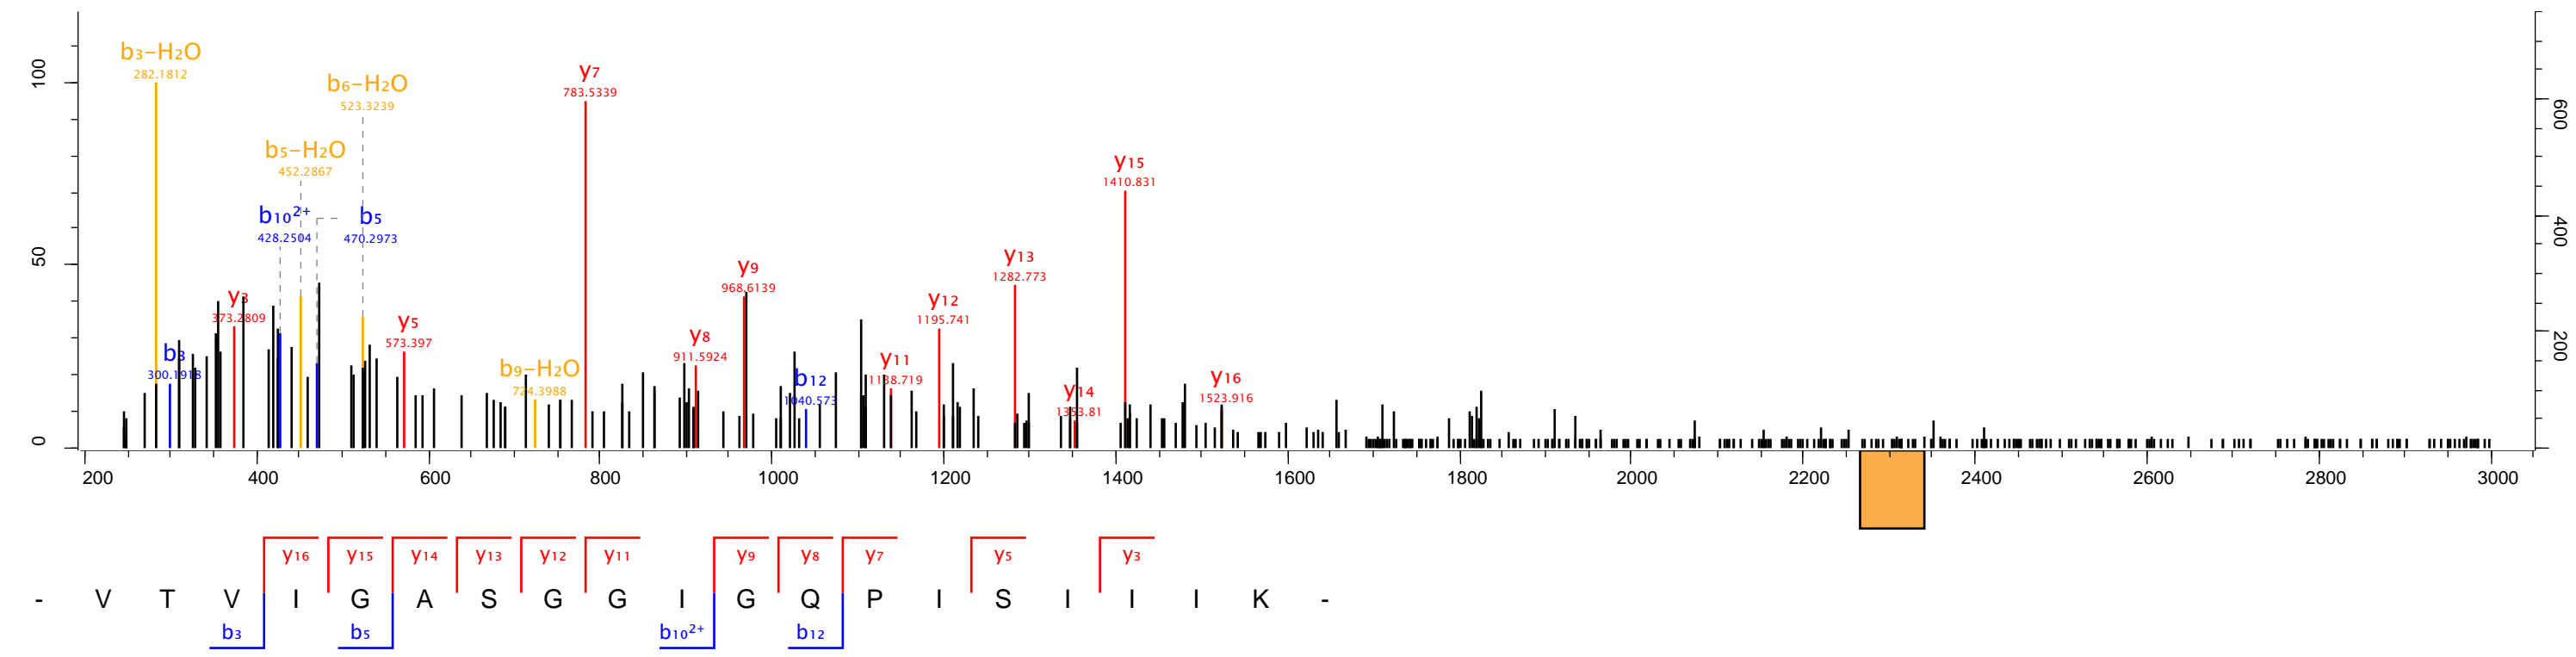

Raw file: 2014-10-22\_CL04\_Embx2dil\_4Hz  
 Scan: 6415 Method: TOF; CID Score: 58.25 m/z: 971.98

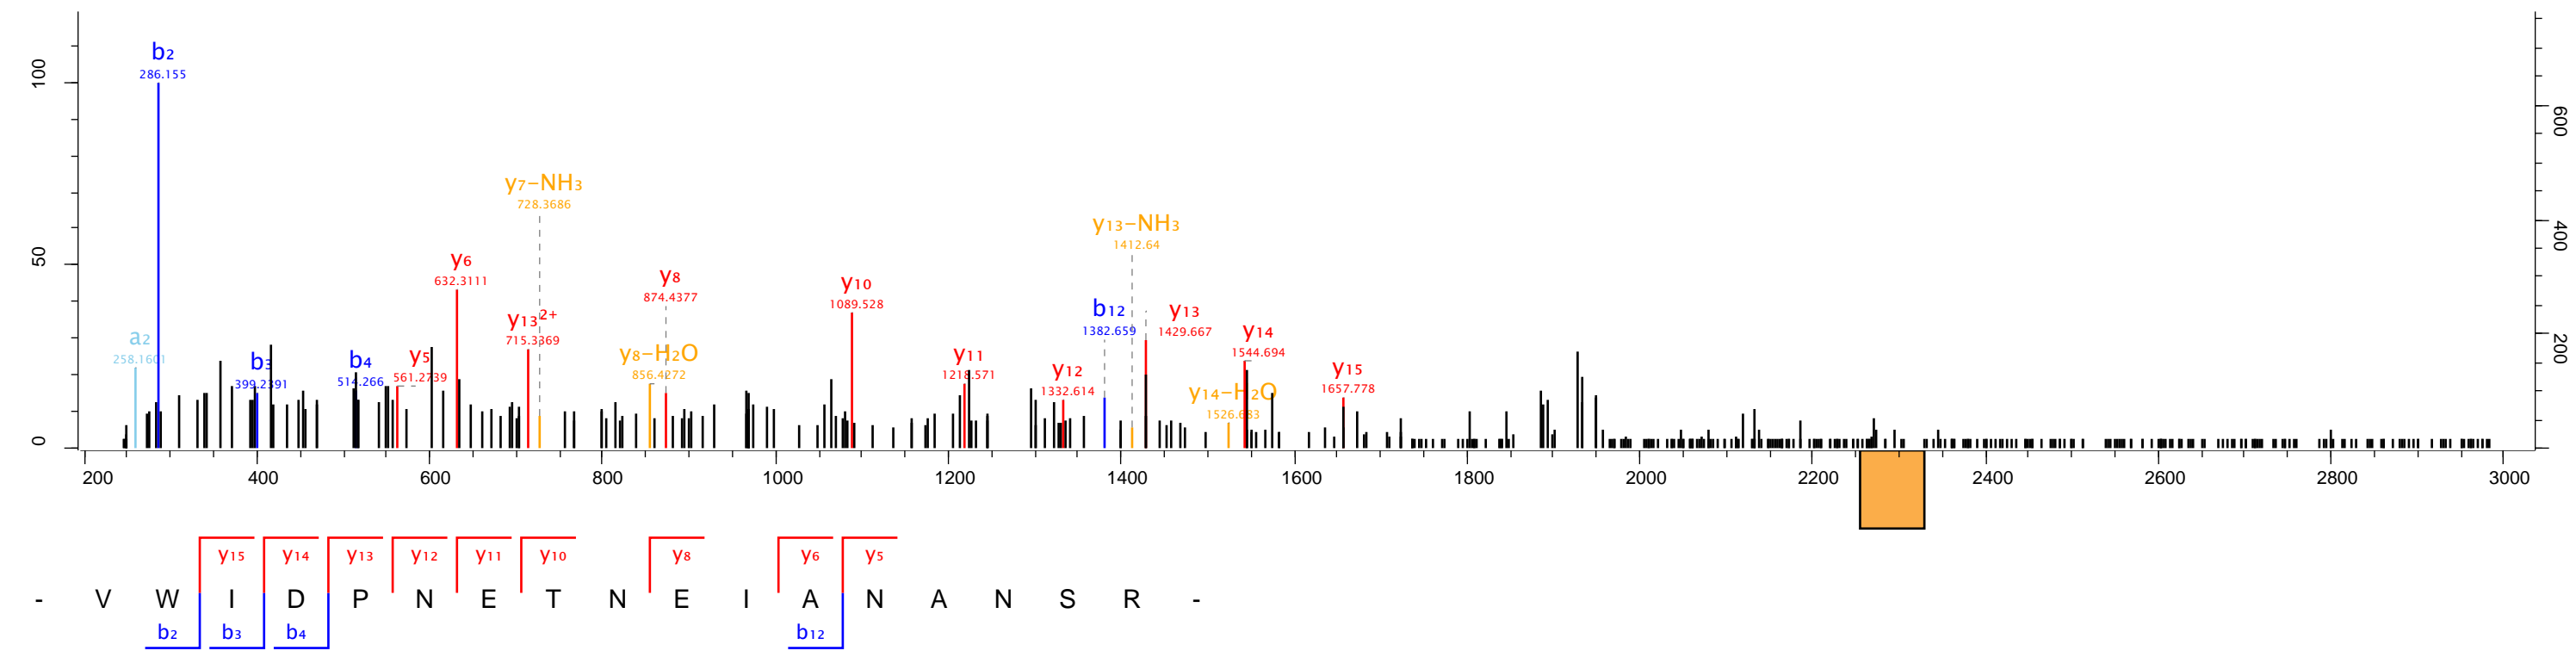

Spectral Annotation for Single-Peptide IDs in 16-cell Embryo using qQ-TOF

Raw file 2014-10-22\_CL04\_Embx2dil\_4Hz Scan 6451 Method TOF; CID Score 100.23 m/z 894.48

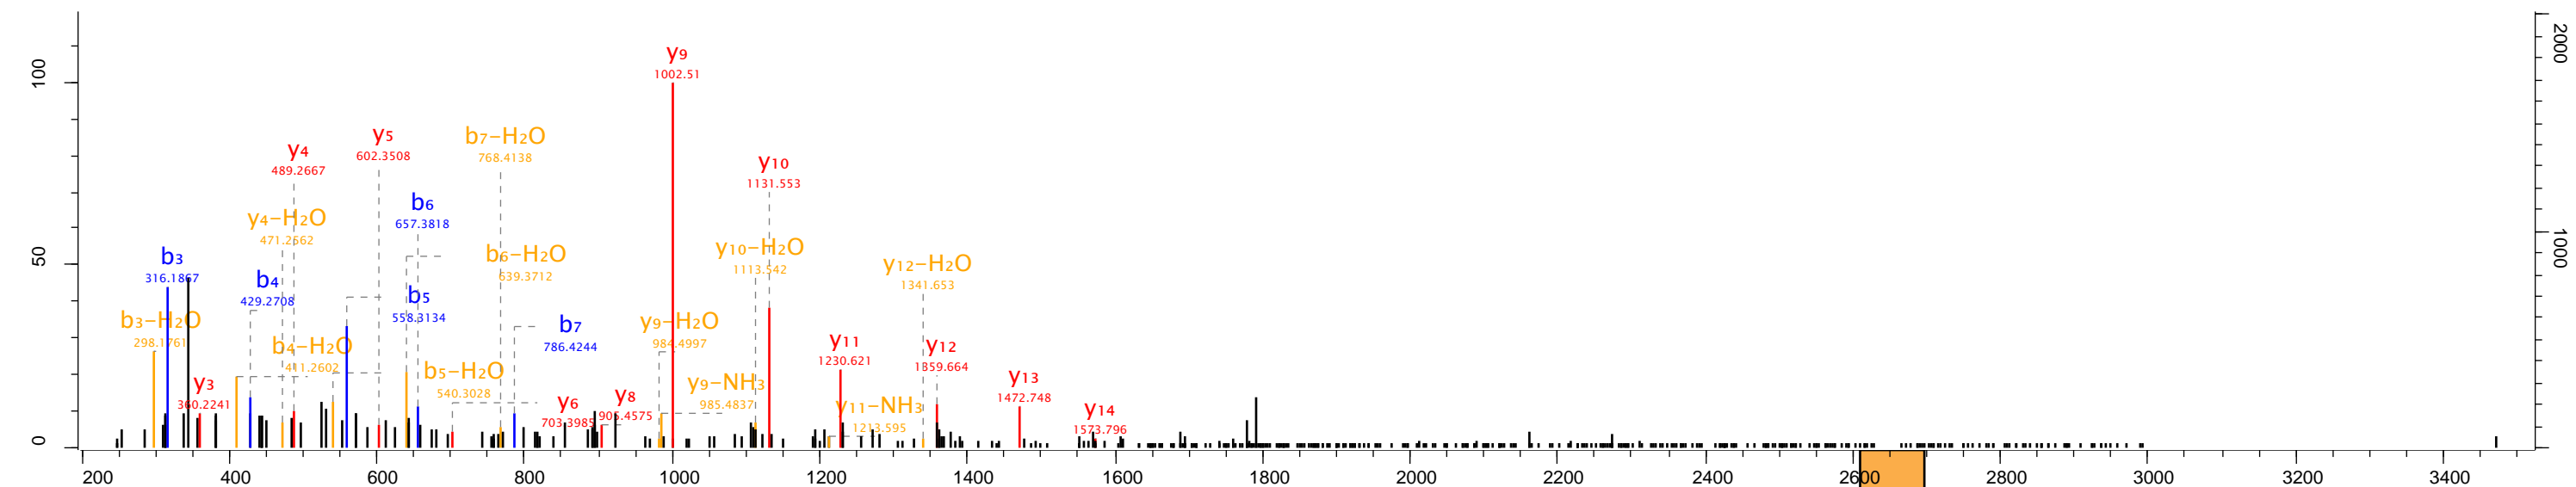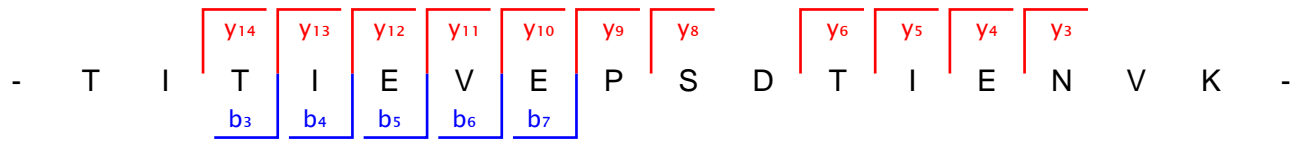

Raw file: 2014-10-22\_CL04\_Embx2dil\_4Hz  
 Scan: 6463 Method: TOF; CID Score: 22.43 m/z: 949.99

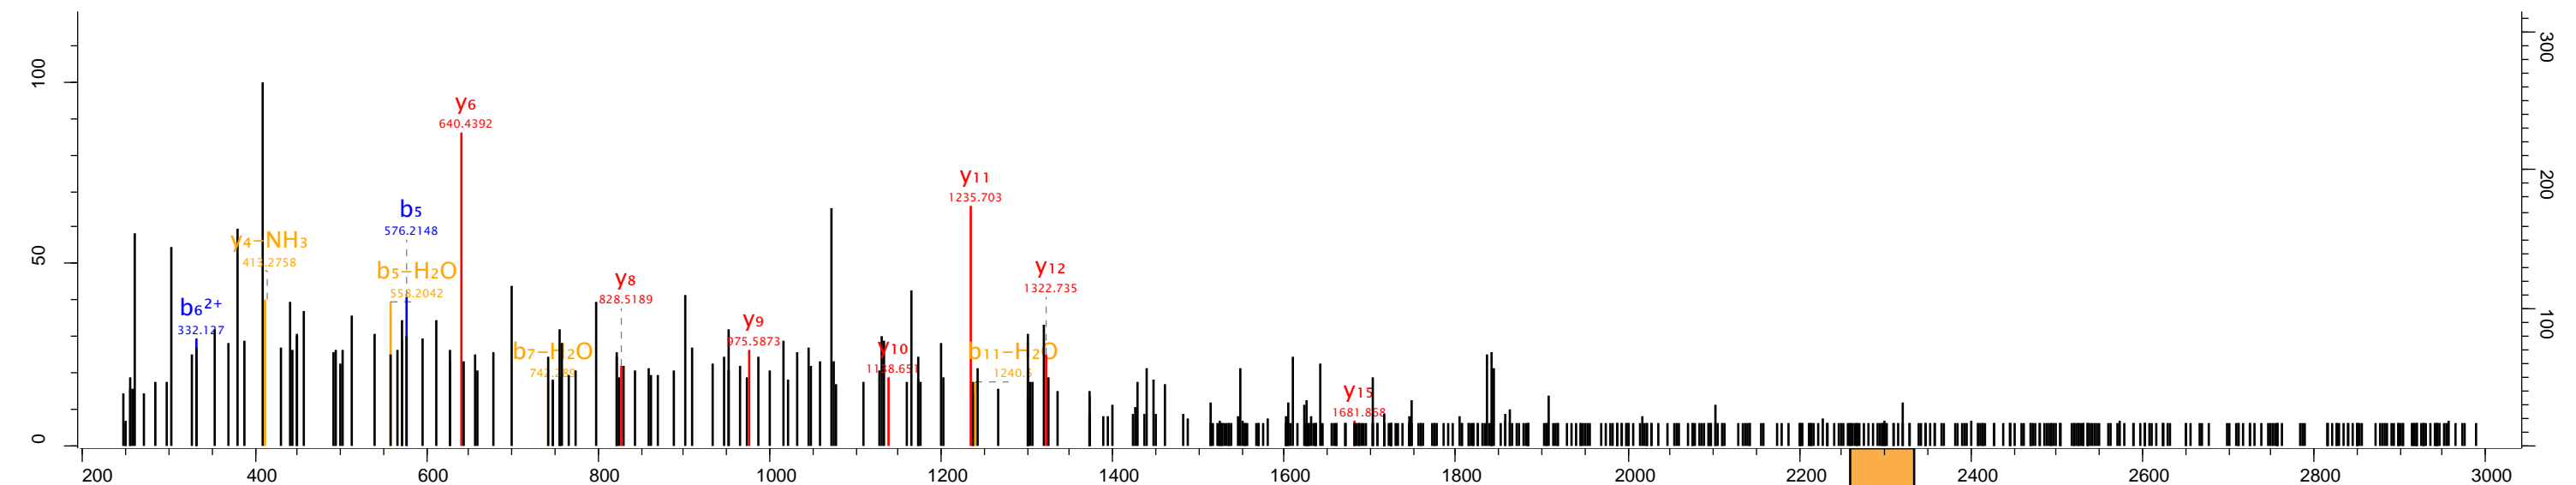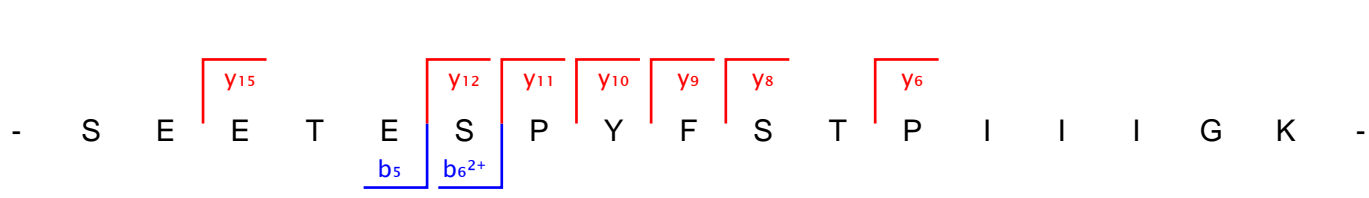

Spectral Annotation for Single-Peptide IDs in 16-cell Embryo using qQ-TOF

Raw file: 2014-10-22\_CL04\_Embx2dil\_4Hz  
 Scan: 6497 Method: TOF; CID Score: 143.75 m/z: 1022.56

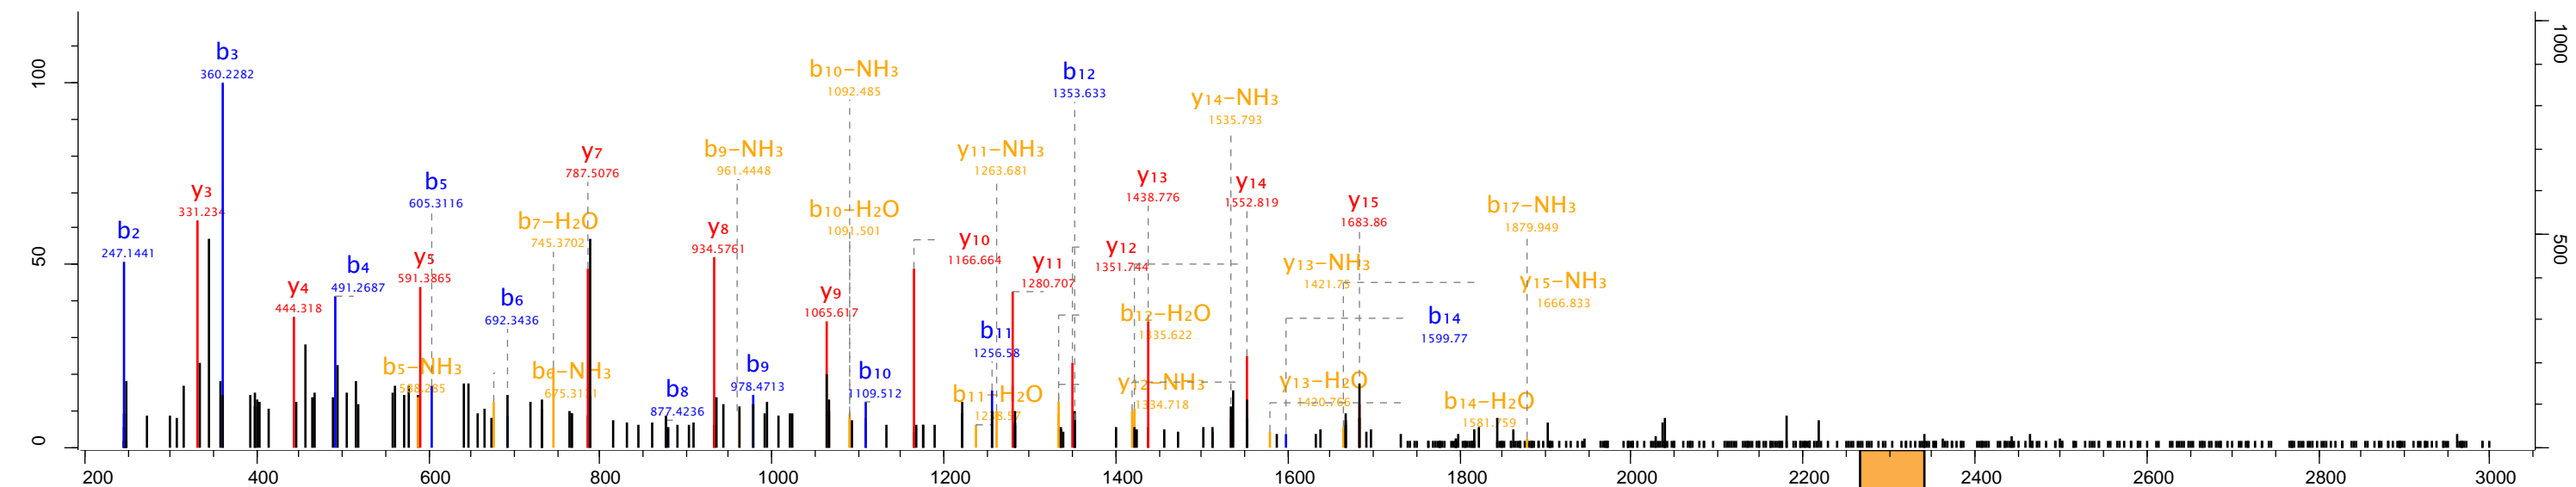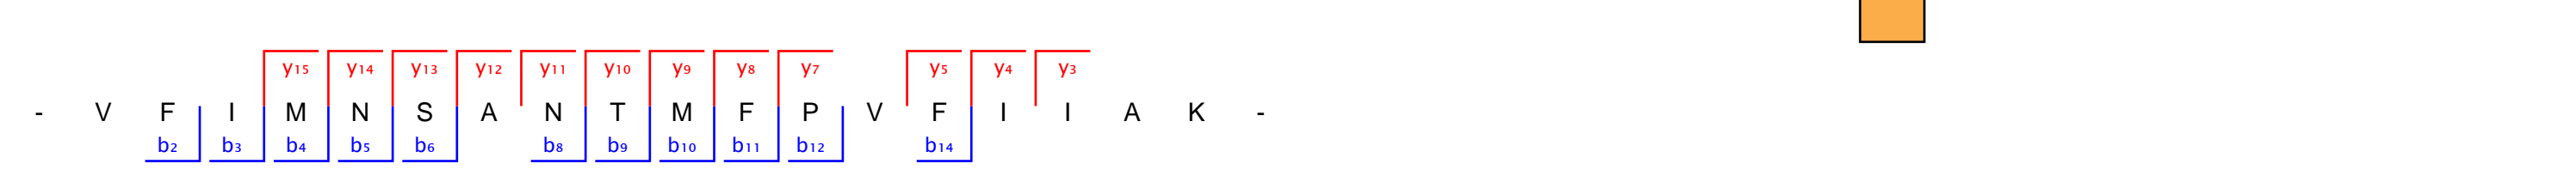

Spectral Annotation for Single-Peptide IDs in 16-cell Embryo using qQ-TOF



Raw file  
 2014-10-22\_CL04\_Embx2dil\_4Hz  
 Scan 6562 Method TOF; CID Score 54.22 m/z 1074.05

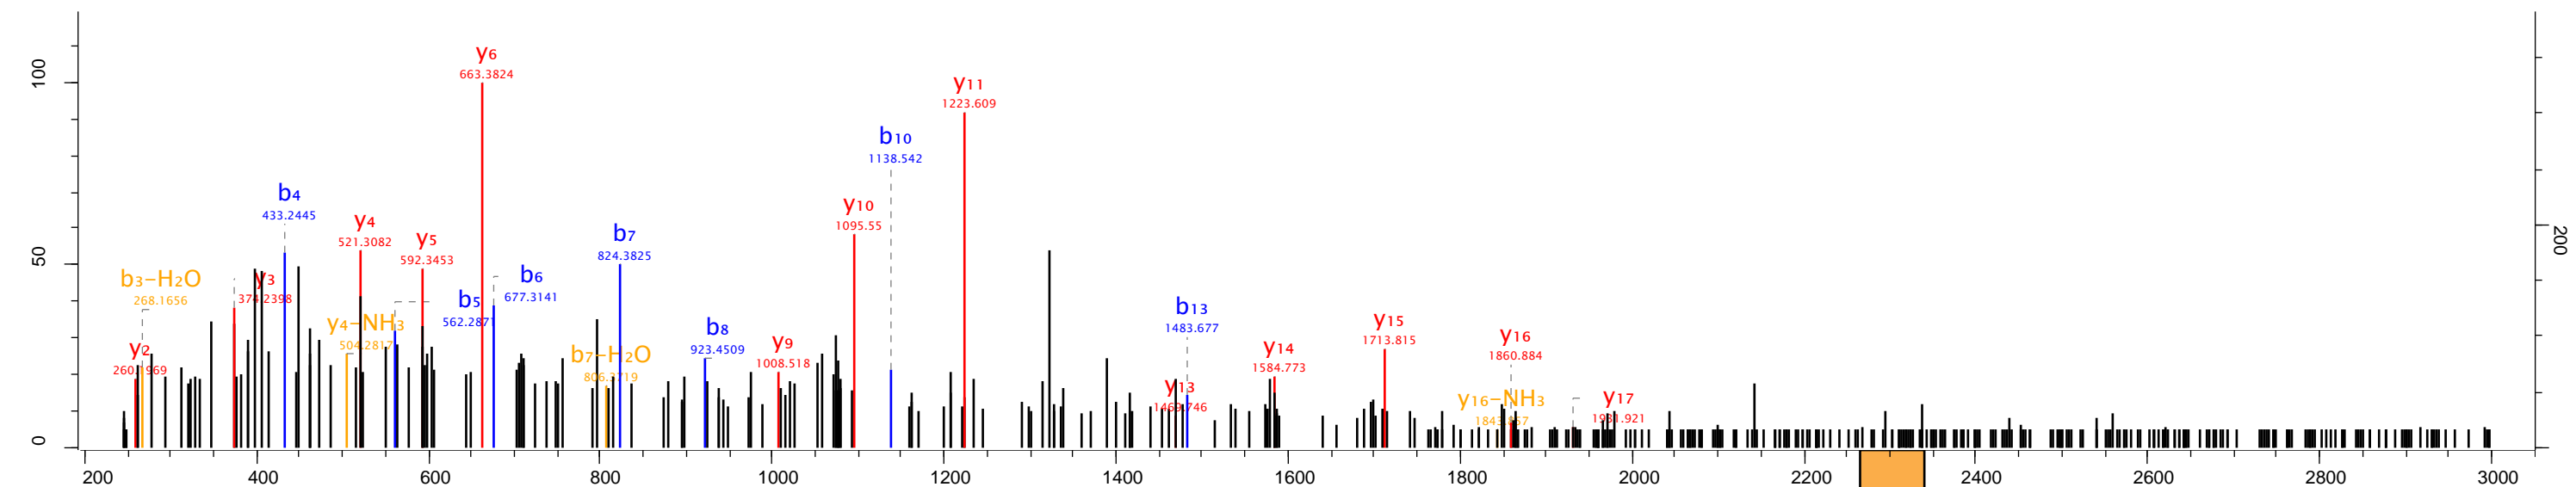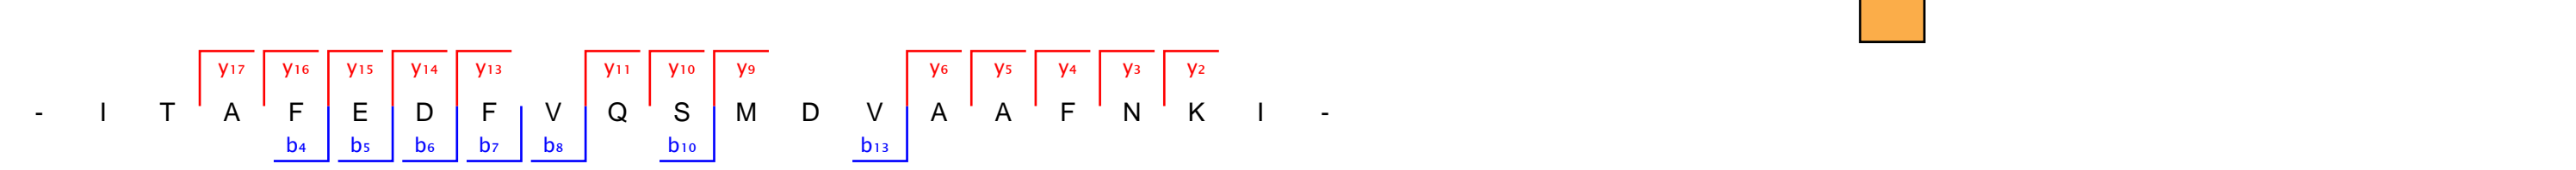

Spectral Annotation for Single-Peptide IDs in 16-cell Embryo using qQ-TOF

Raw file: 2014-10-22\_CL04\_Embx2dil\_4Hz  
 Scan: 6606  
 Method: TOF; CID  
 Score: 99.09  
 m/z: 1012.02

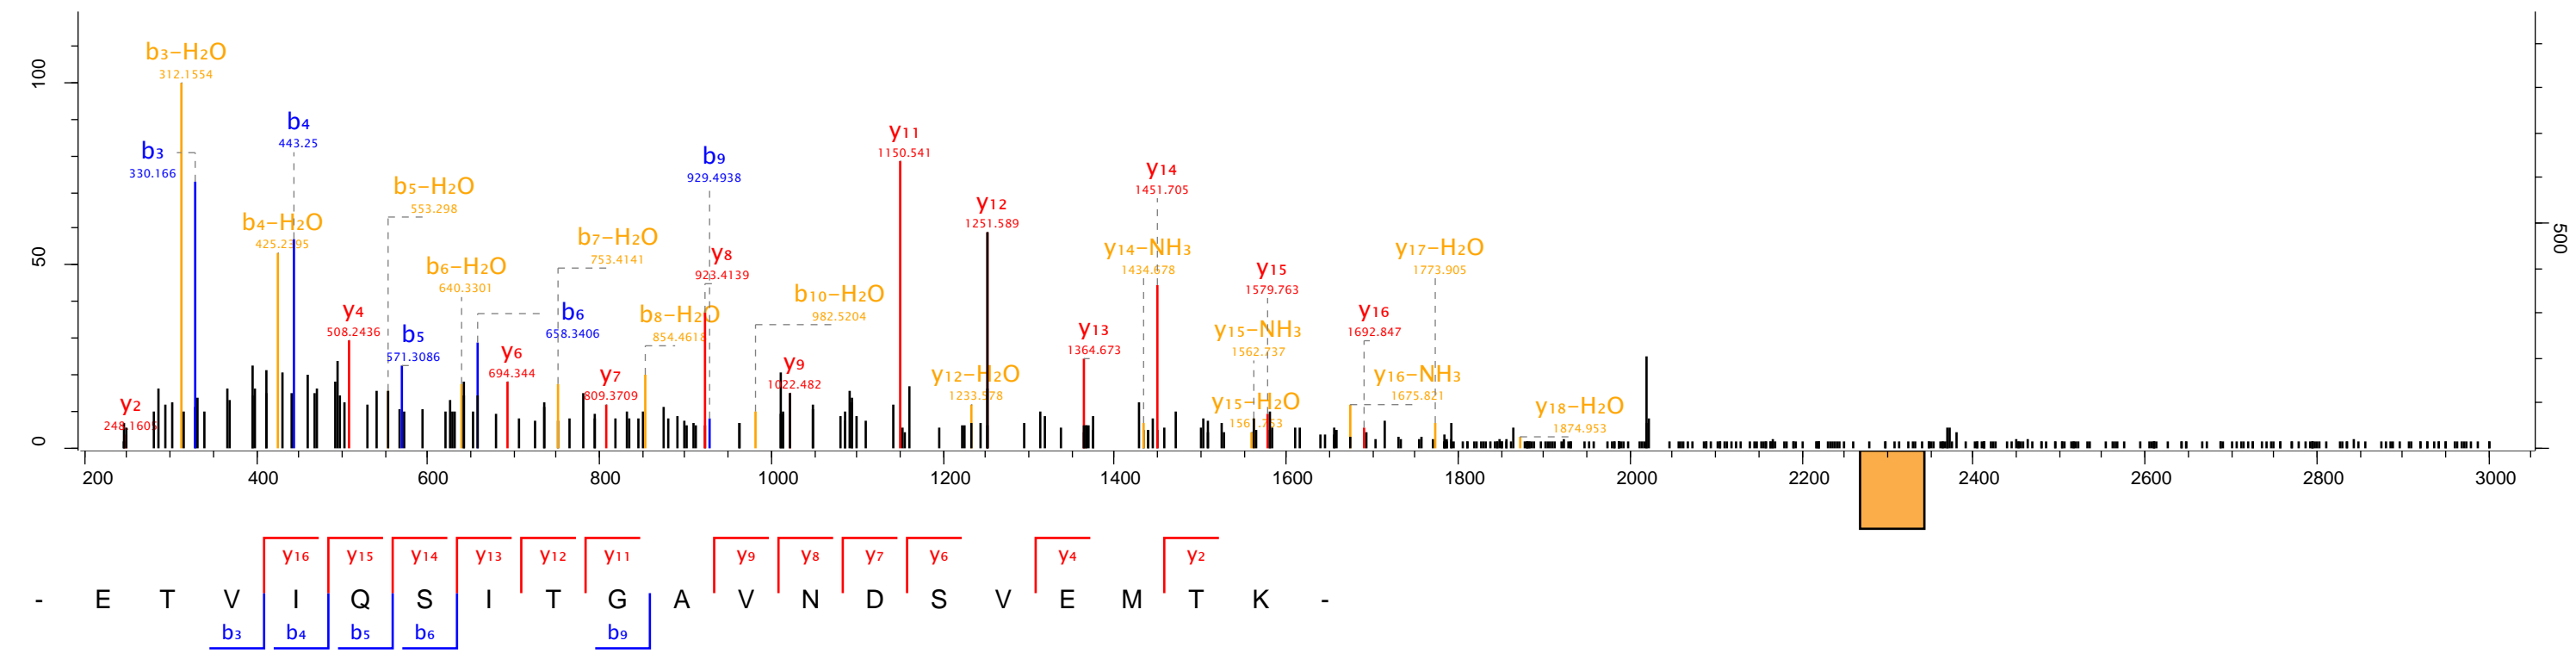

Spectral Annotation for Single-Peptide IDs in 16-cell Embryo using qQ-TOF

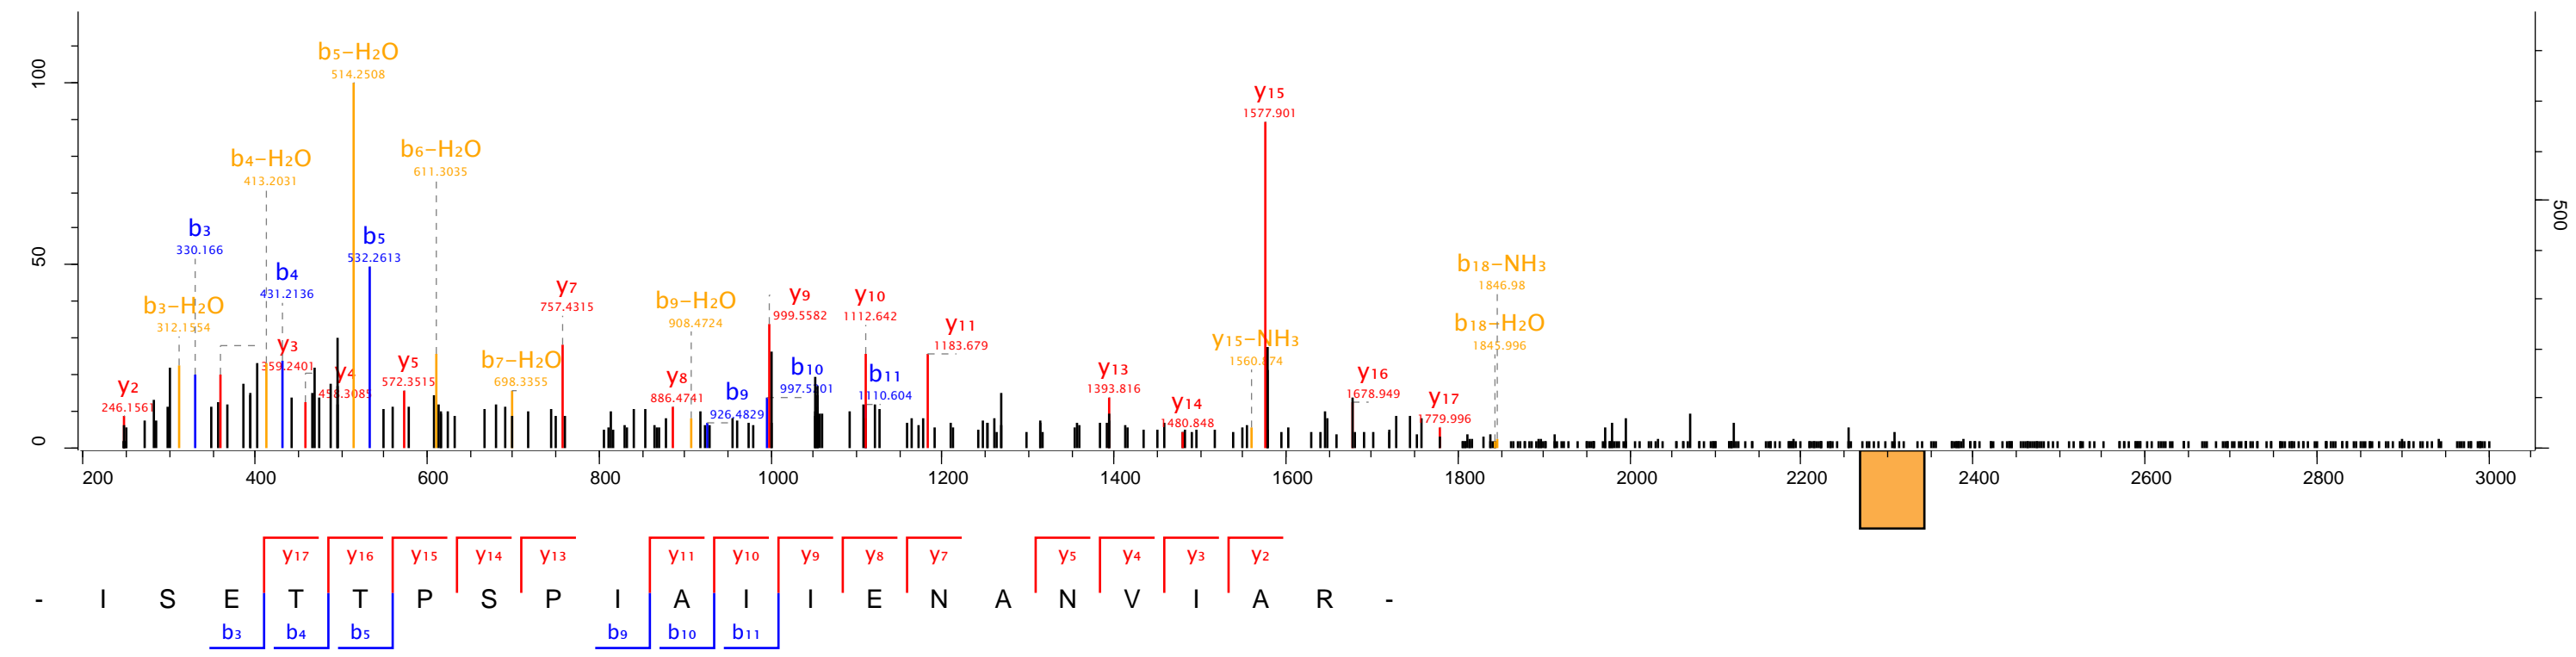

Spectral Annotation for Single-Peptide IDs in 16-cell Embryo using qQ-TOF

Raw file Scan Method Score m/z  
 2014-10-22\_CL04\_Embx2dil\_4Hz 6666 TOF; CID 82.5 644.33

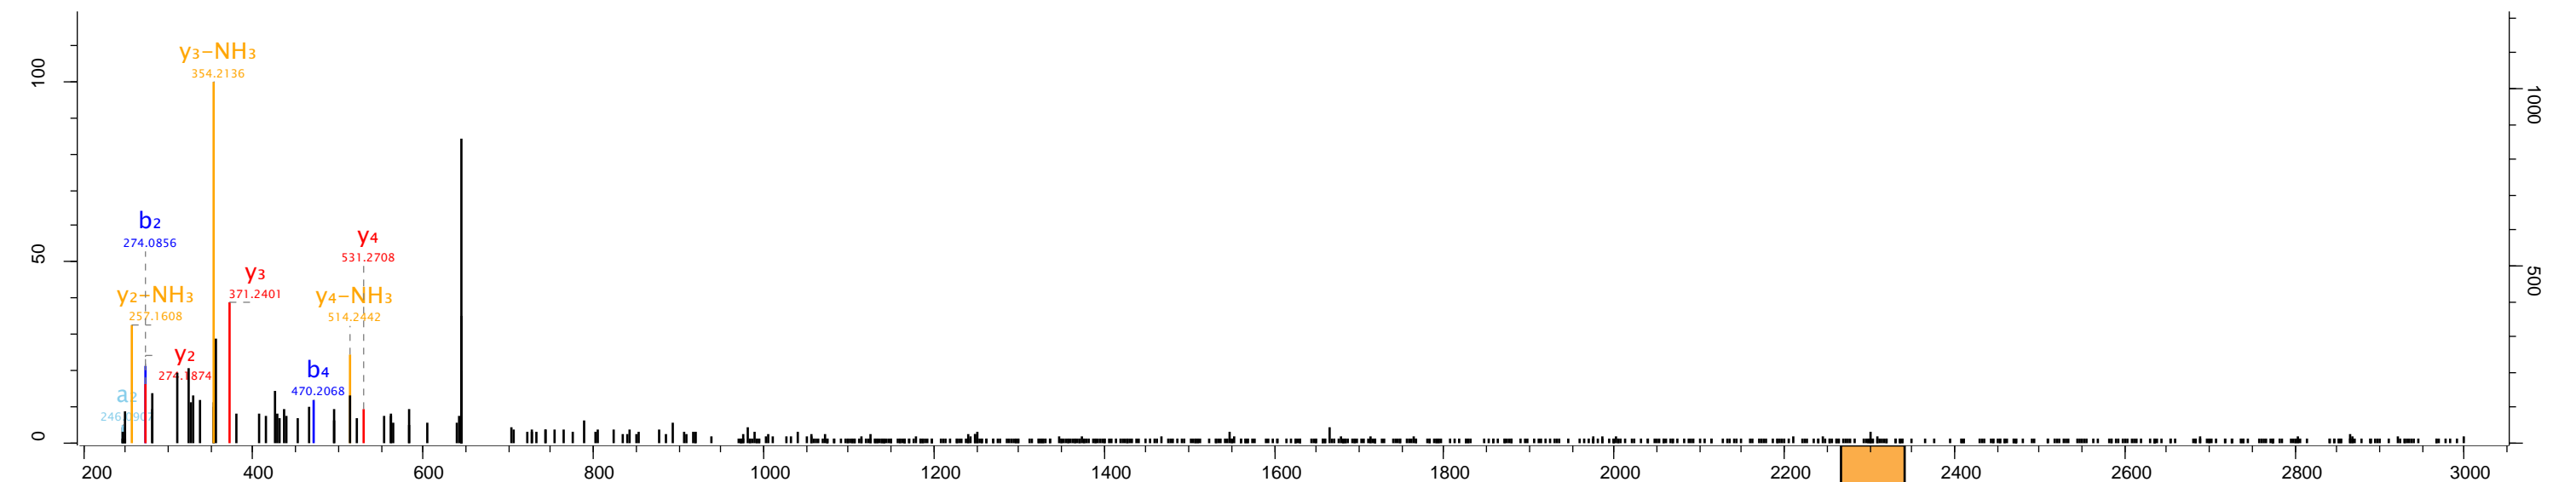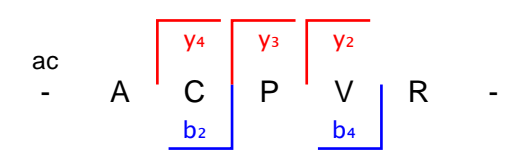

Raw file 2014-10-22\_CL04\_Embx2dil\_4Hz Scan 6677 Method TOF; CID Score 191.32 m/z 1035.53

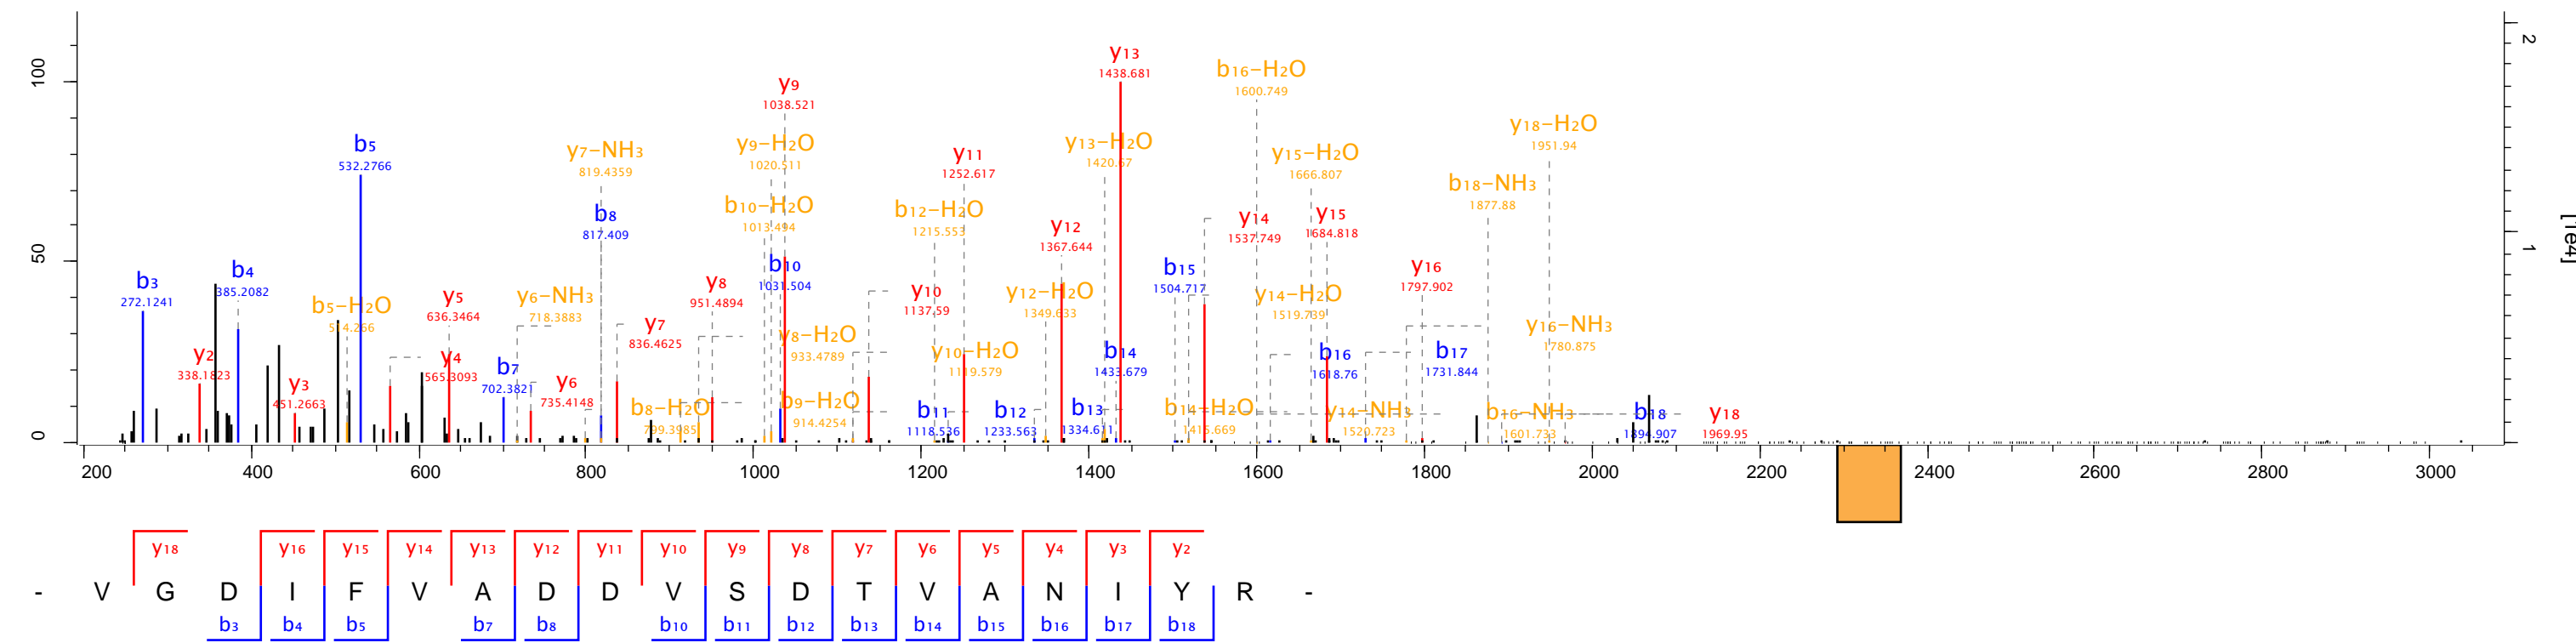

Spectral Annotation for Single-Peptide IDs in 16-cell Embryo using qQ-TOF

Raw file 2014-10-22\_CL04\_Embx2dil\_4Hz  
 Scan 6707 Method TOF; CID Score 44.79 m/z 958.01

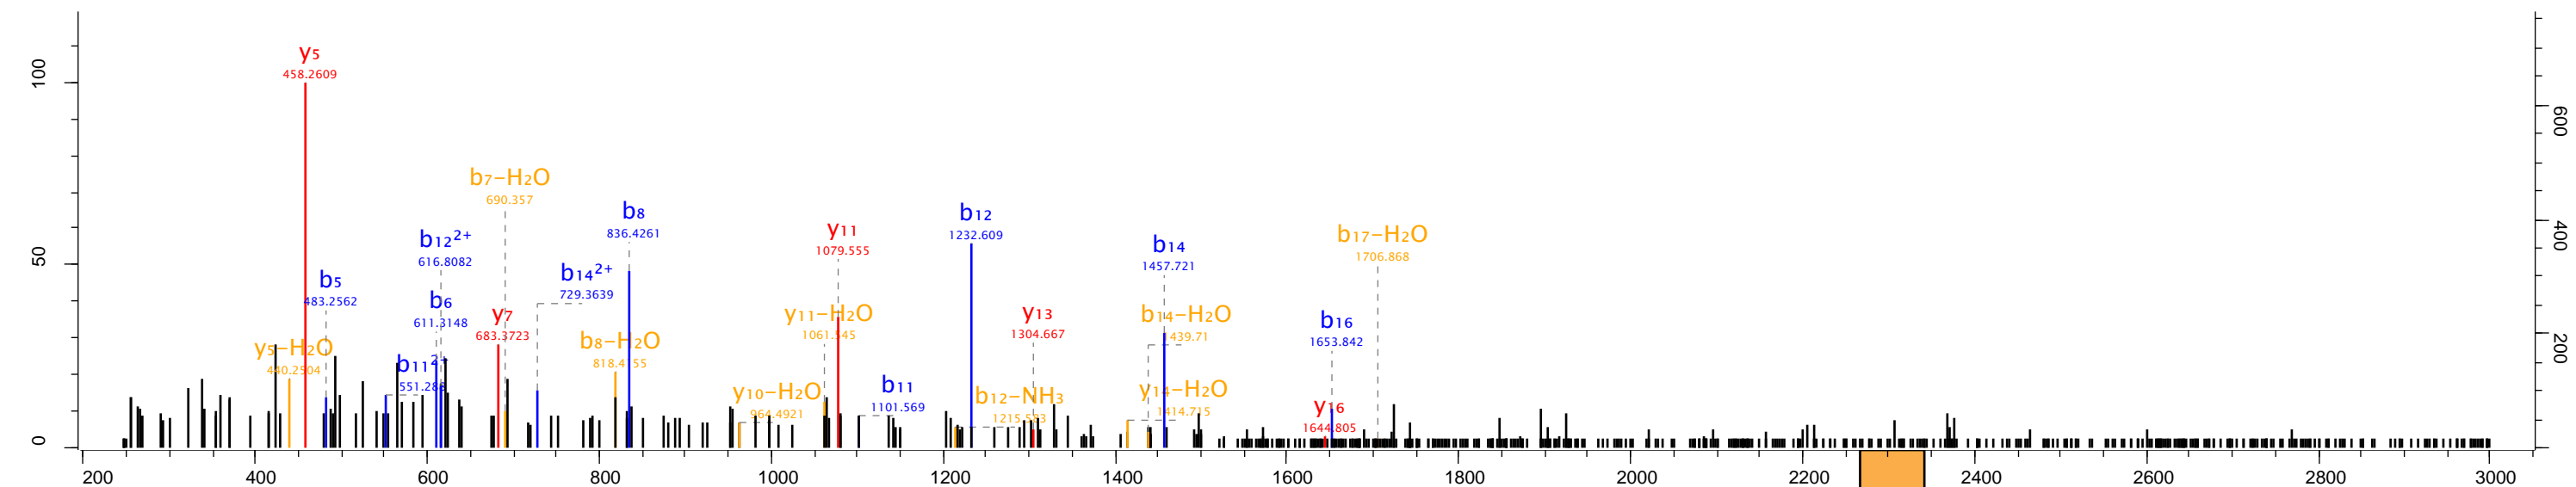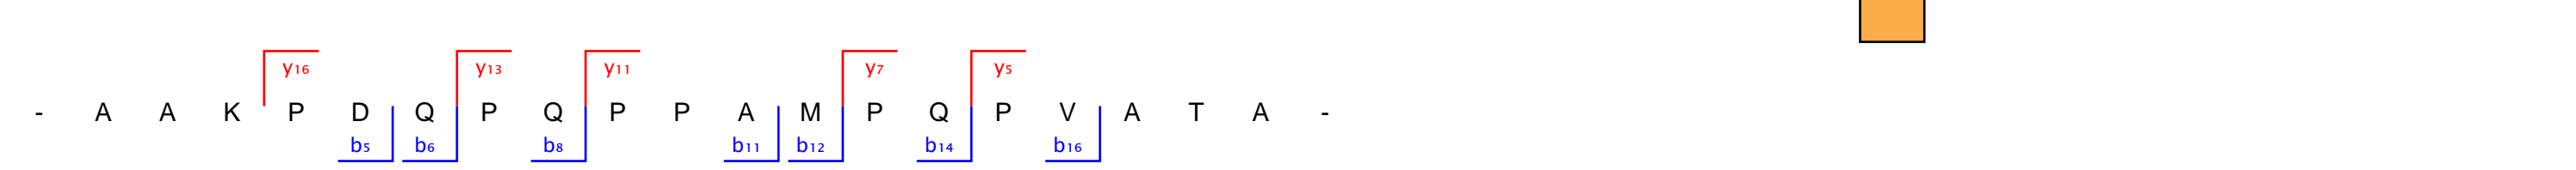

Raw file: 2014-10-22\_CL04\_Embx2dil\_4Hz  
 Scan: 6734 Method: TOF; CID Score: 43.35 m/z: 1107.54

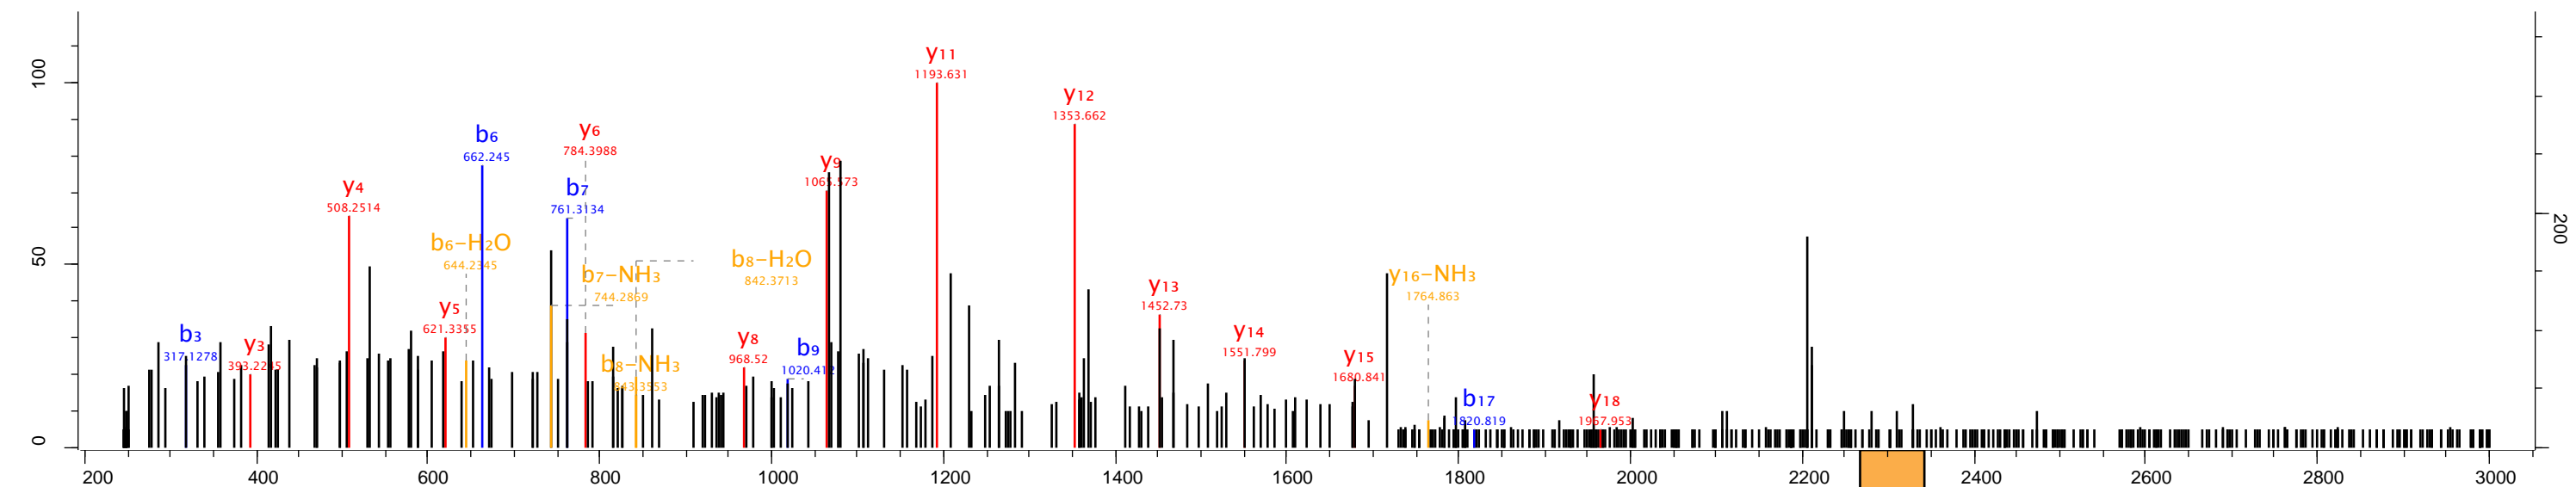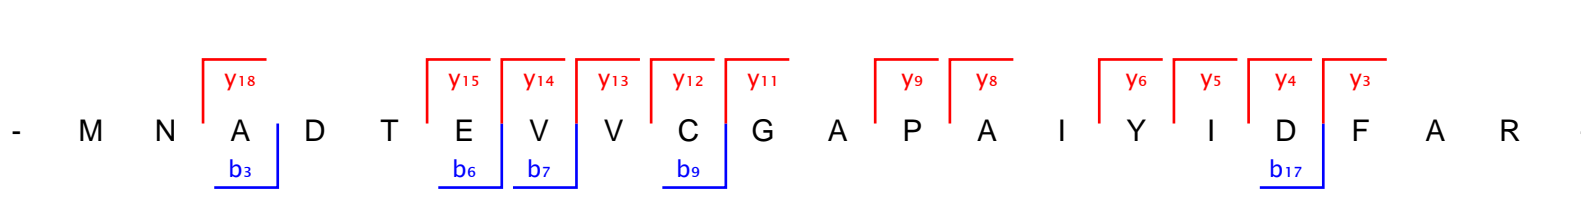

Spectral Annotation for Single-Peptide IDs in 16-cell Embryo using qQ-TOF

Raw file Scan Method Score m/z  
 2014-10-22\_CL04\_Embx2dil\_4Hz 6775 TOF; CID 175.86 1165.11

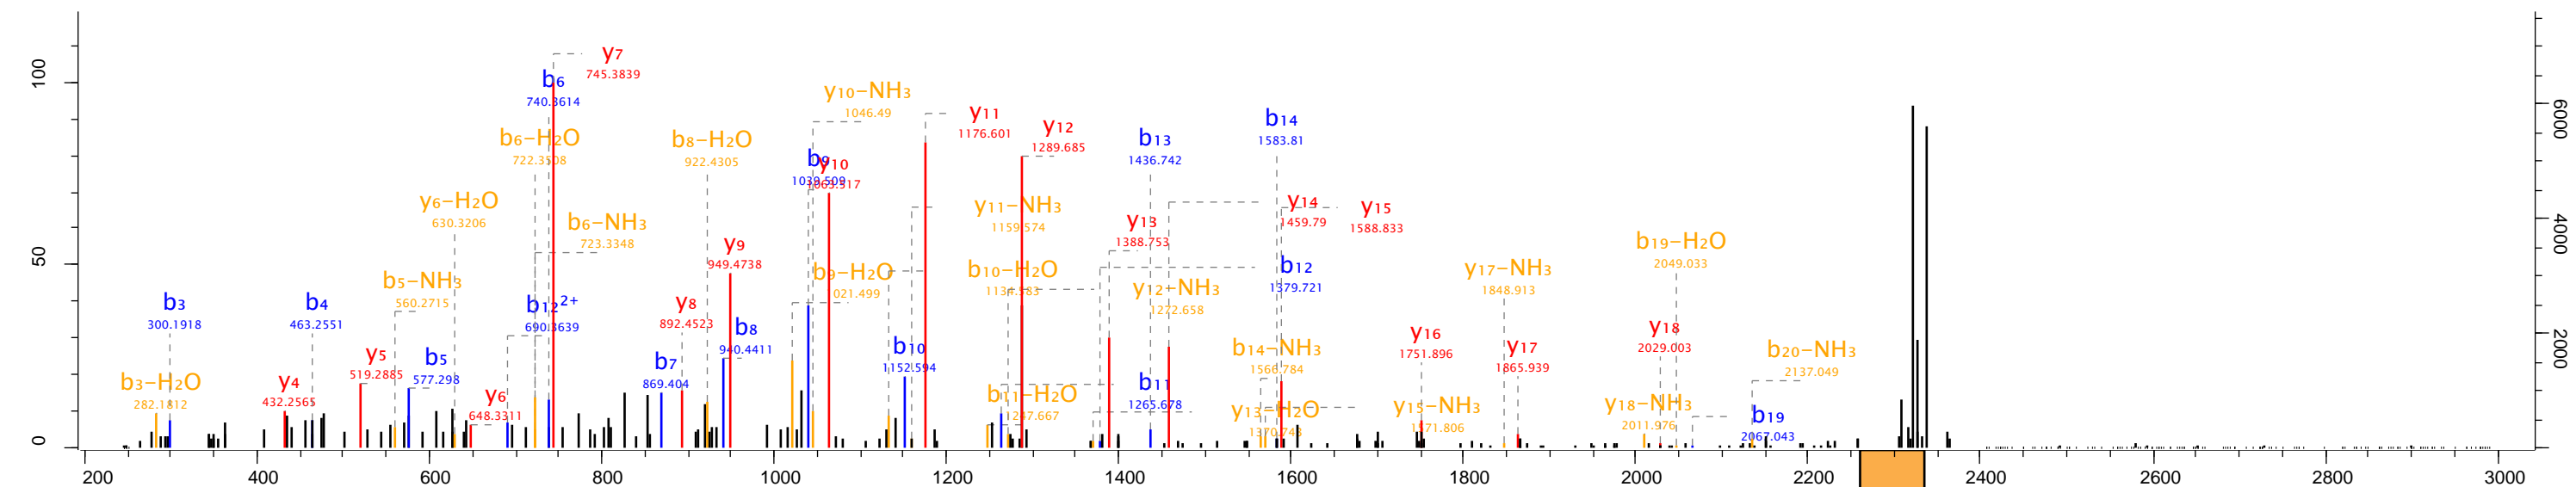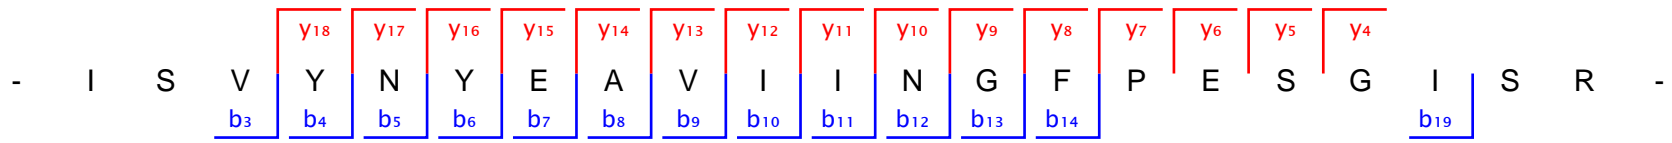

Spectral Annotation for Single-Peptide IDs in 16-cell Embryo using qQ-TOF



Raw file 2014-10-22\_CL04\_Embx2dil\_4Hz Scan 6972 Method TOF; CID Score 132.65 m/z 1168.58

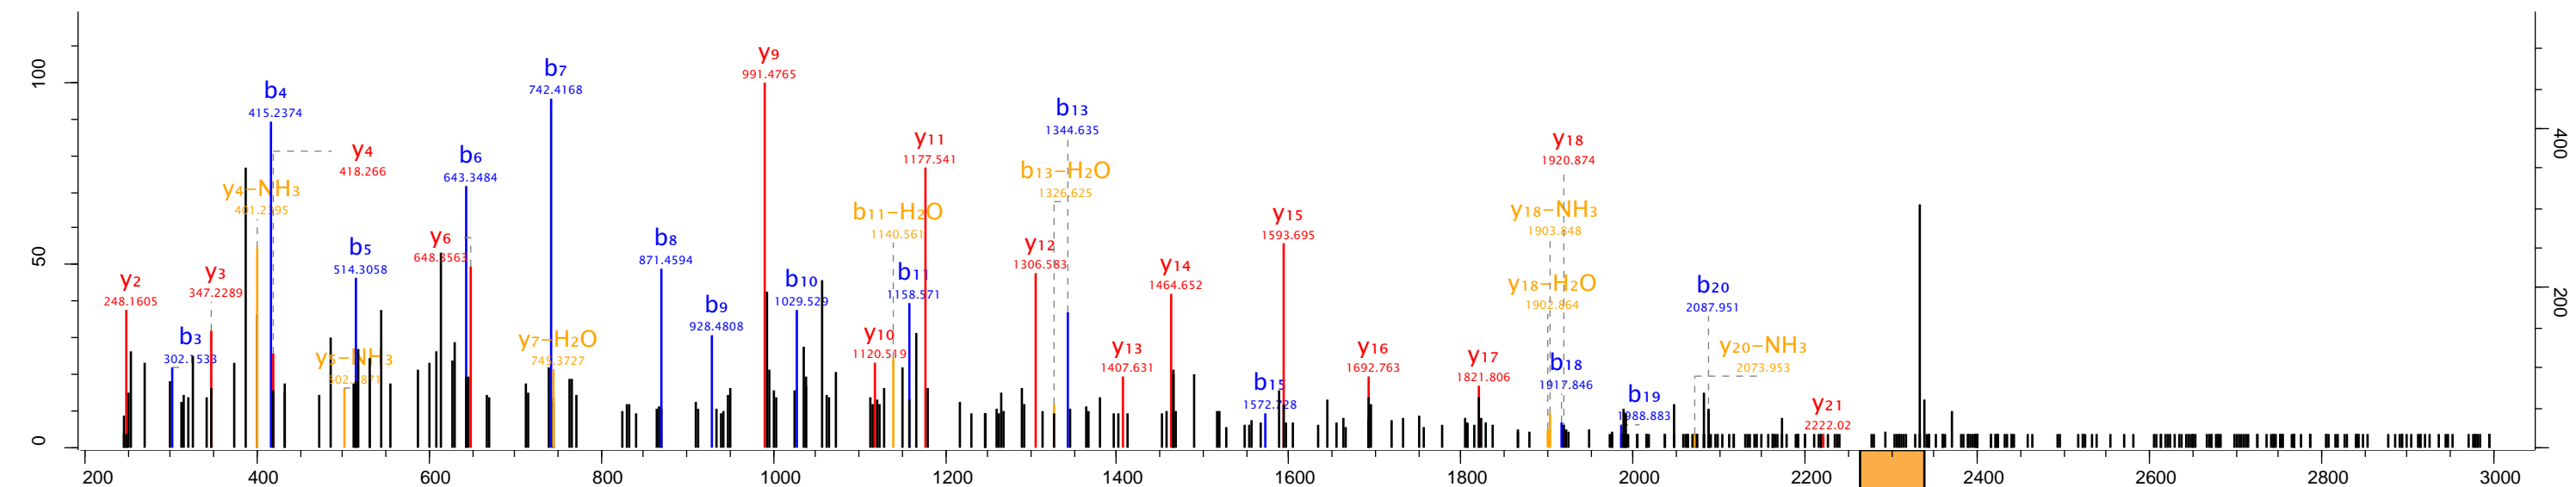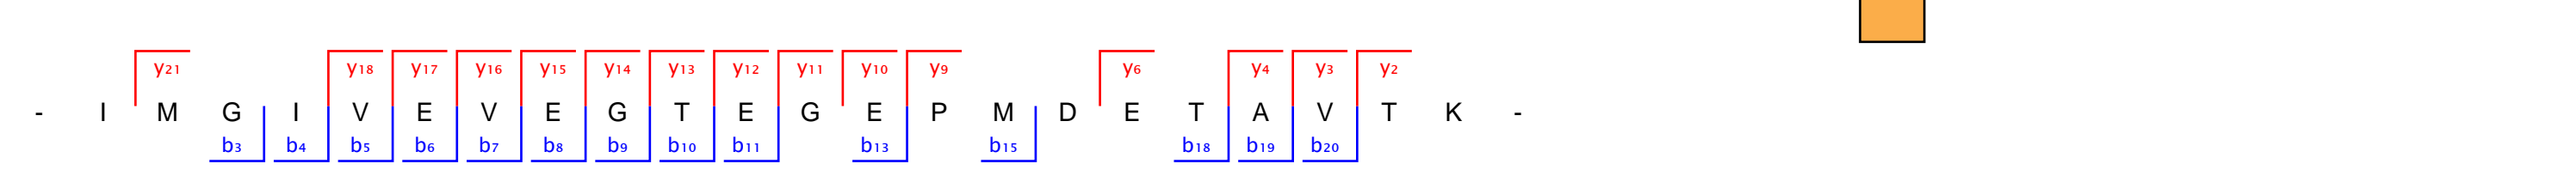

Spectral Annotation for Single-Peptide IDs in 16-cell Embryo using qQ-TOF

Raw file: 2014-10-22\_CL04\_Embx2dil\_4Hz  
 Scan: 6987 Method: TOF; CID Score: 41.45 m/z: 851.08

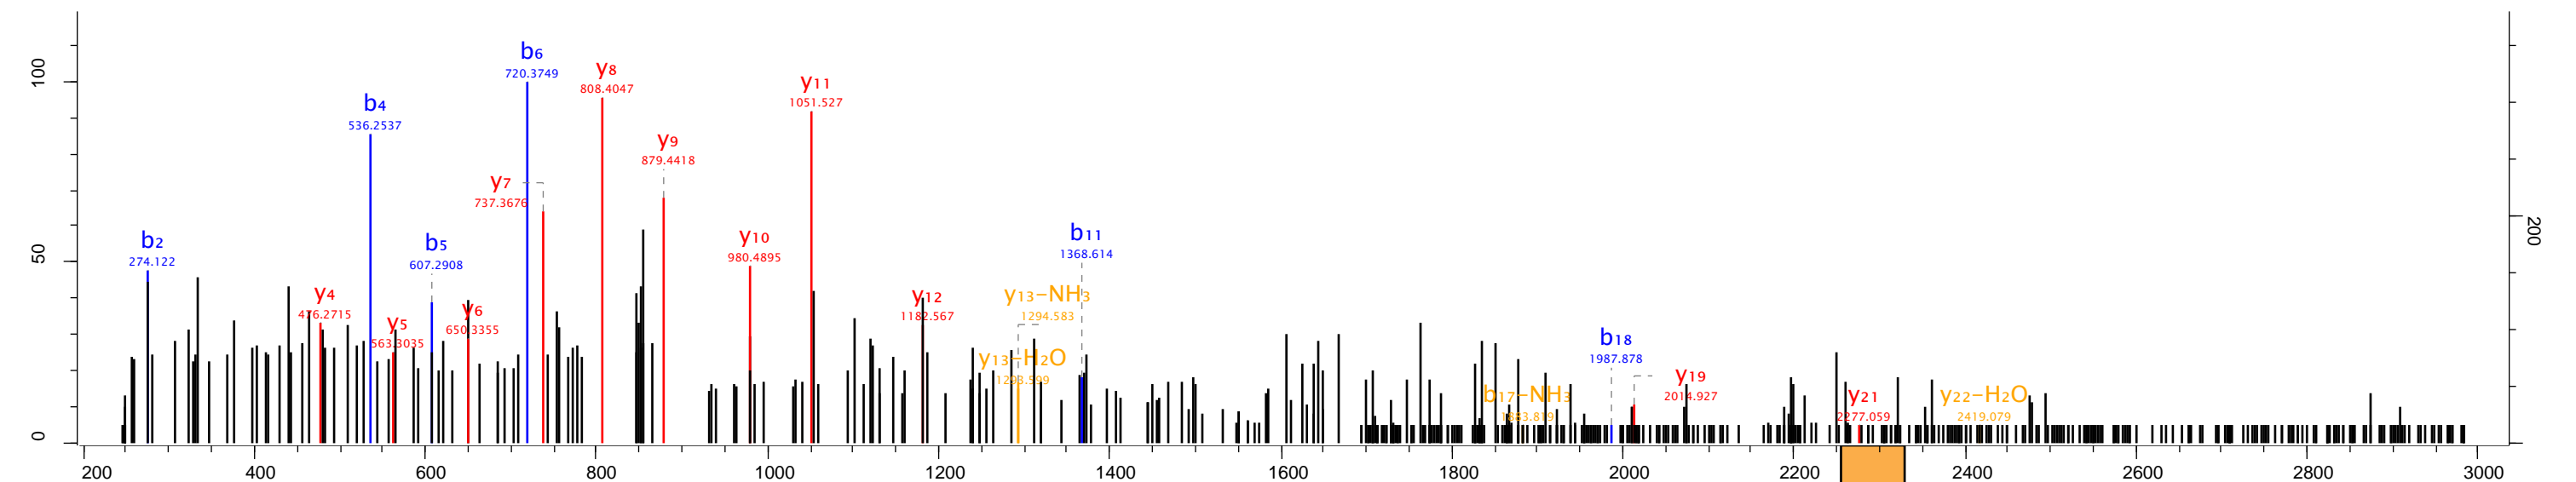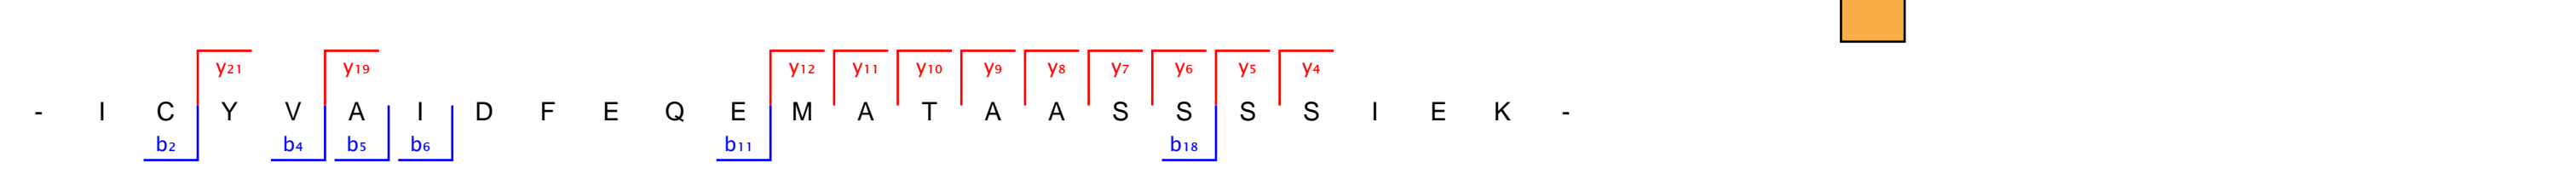

Spectral Annotation for Single-Peptide IDs in 16-cell Embryo using qQ-TOF

Raw file: 2014-10-22\_CL04\_Embx2dil\_4Hz  
 Scan: 7603 Method: TOF; CID Score: 60.79 m/z: 1012.48

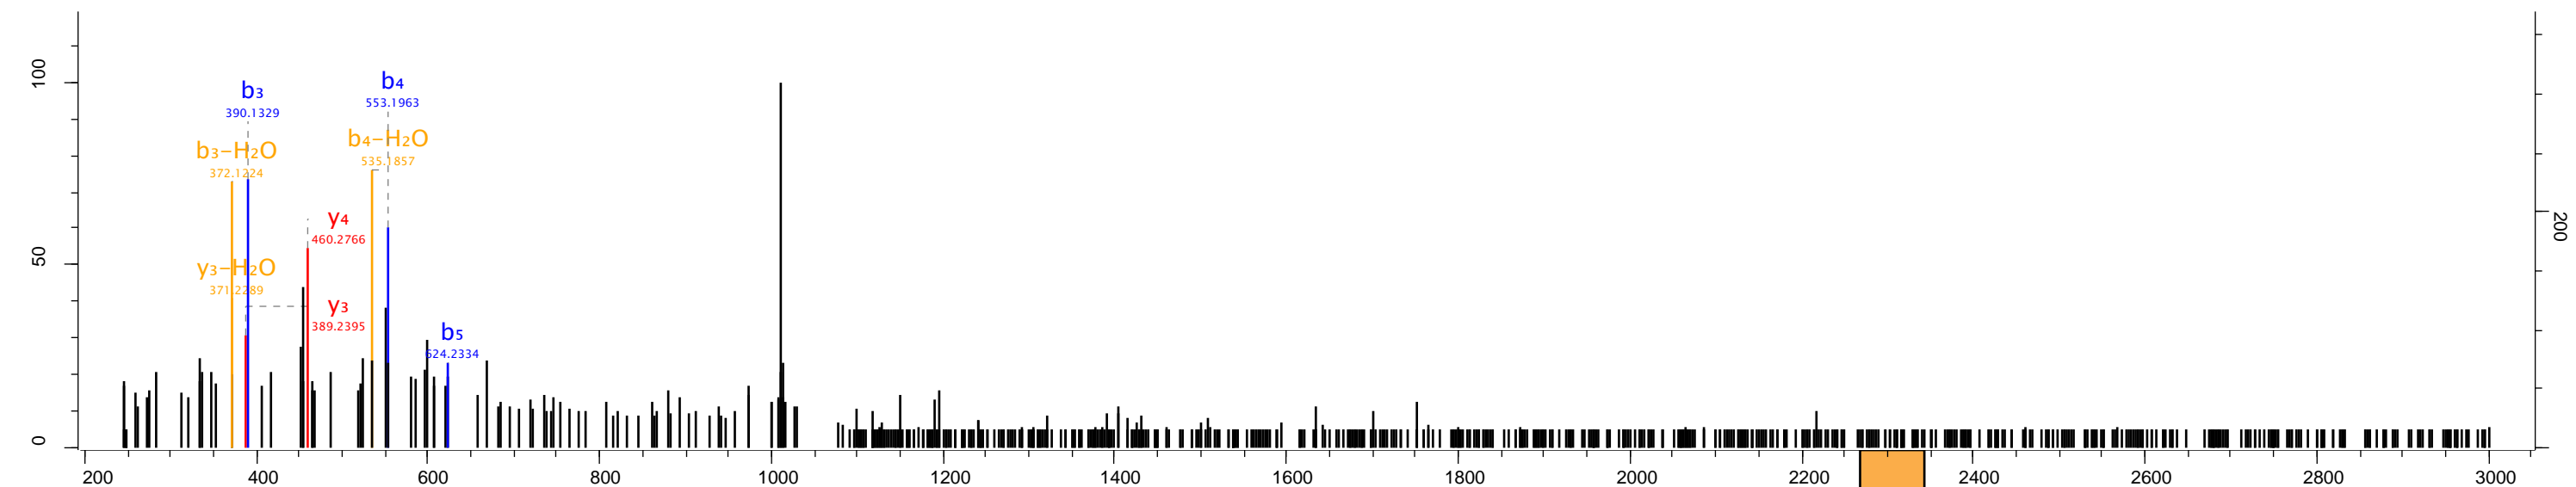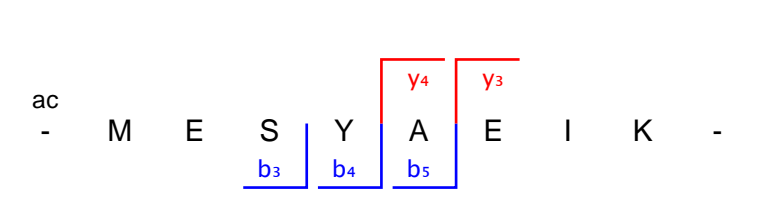

Raw file: 2014-10-22\_CL04\_Embx2dil\_4Hz  
 Scan: 8868 Method: TOF; CID Score: 53.56 m/z: 898.43

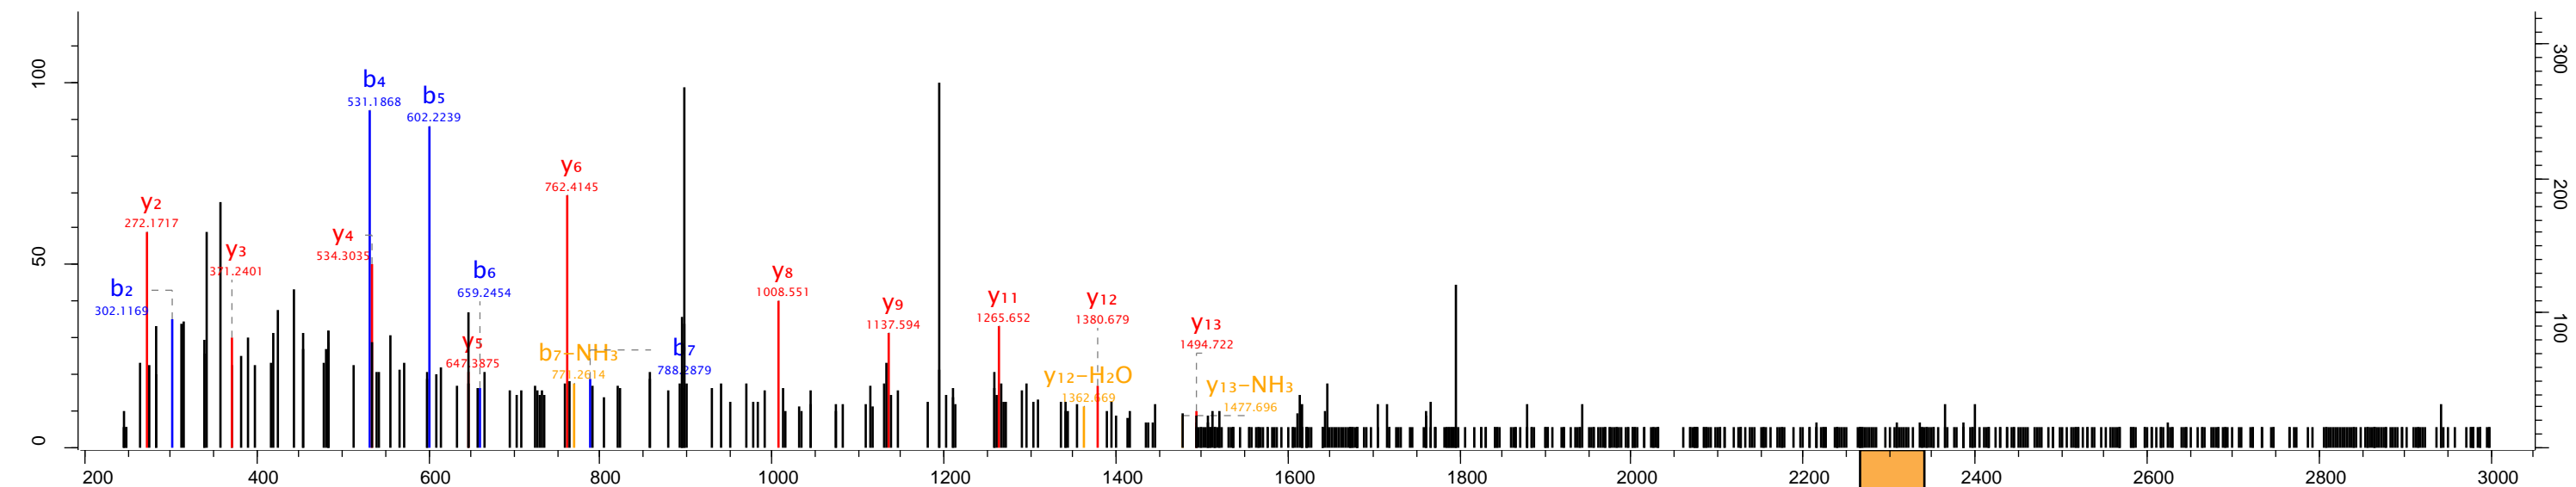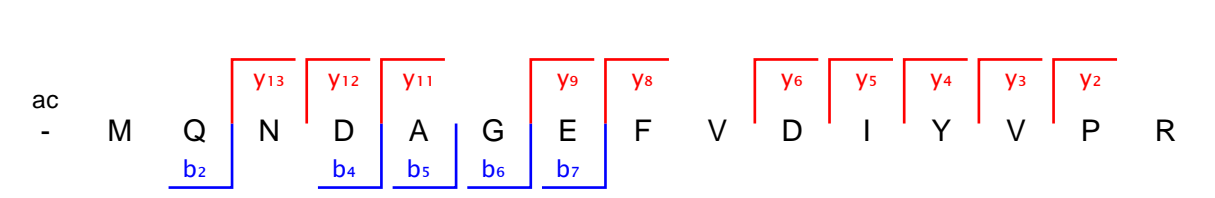

Raw file: 2014-10-22\_CL04\_Embx2dil\_4Hz  
 Scan: 8979 Method: TOF; CID Score: 60.33 m/z: 939.44

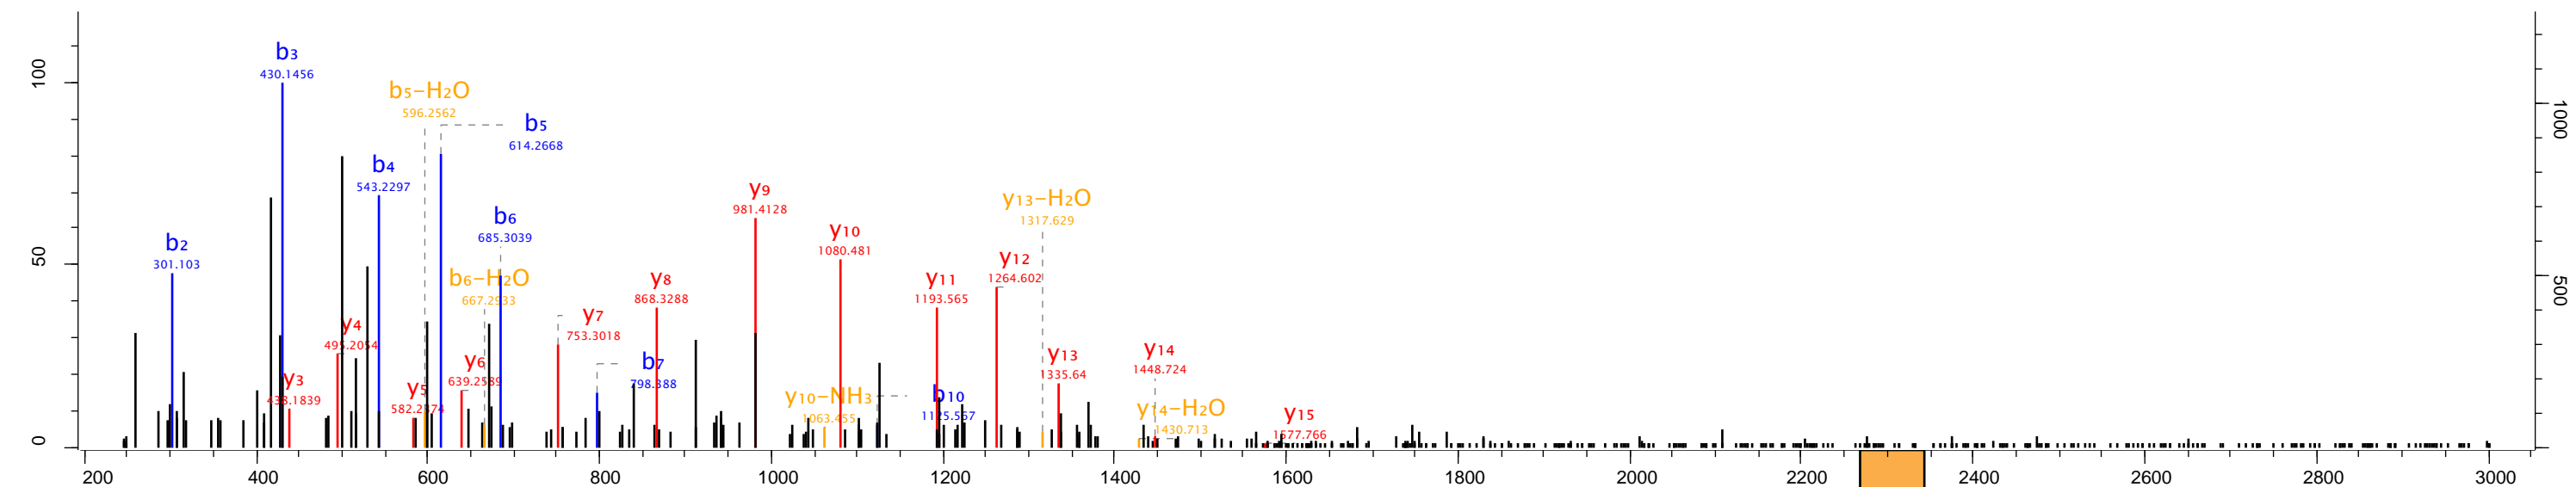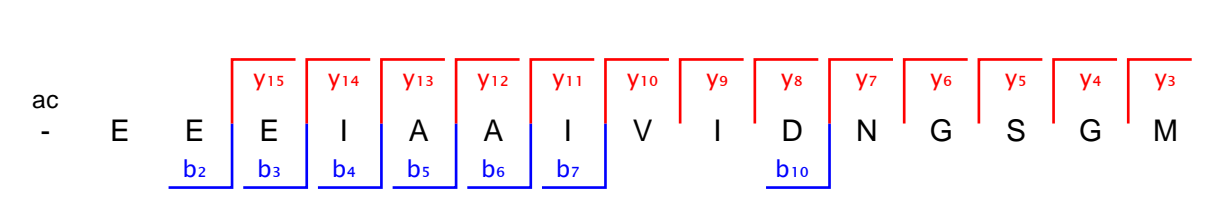

Spectral Annotation for Single-Peptide IDs in 16-cell Embryo using qQ-TOF

Raw file: 2014-10-22\_CL04\_Embx2dil\_4Hz  
 Scan: 8991 Method: TOF; CID Score: 61.48 m/z: 918.42

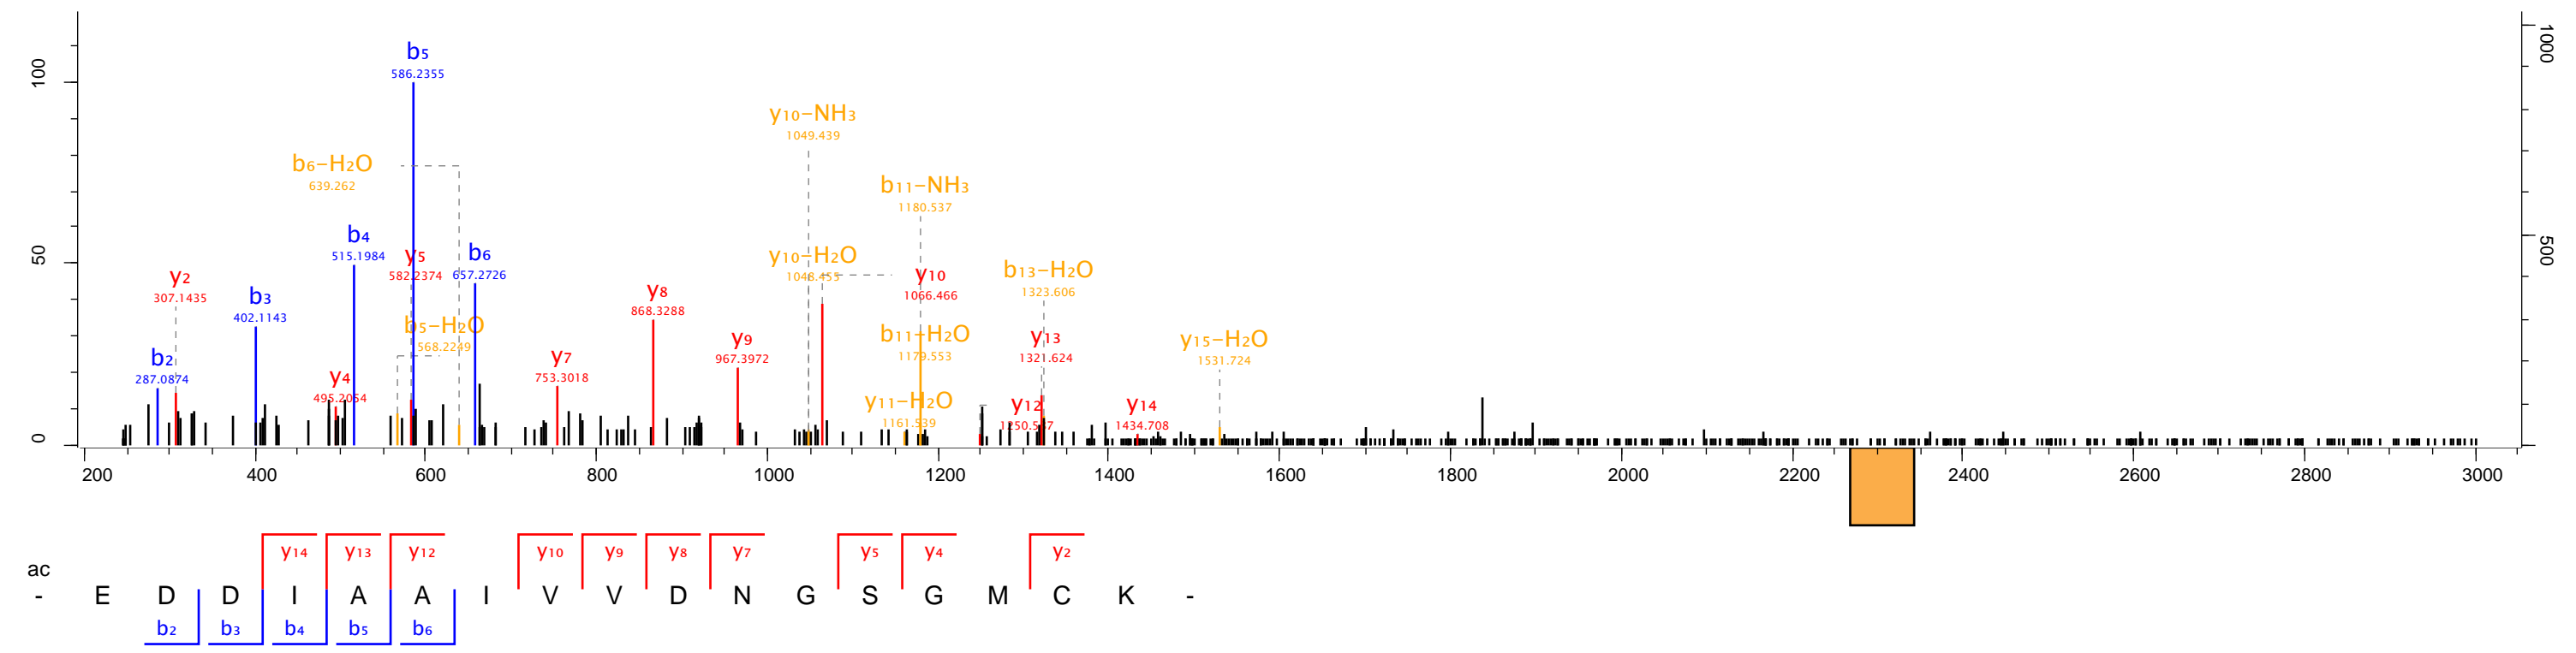

Spectral Annotation for Single-Peptide IDs in 16-cell Embryo using qQ-TOF

Raw file: 2014-10-22\_CL04\_Embx2dil\_4Hz  
 Scan: 9534 Method: TOF; CID Score: 43.84 m/z: 1137.58

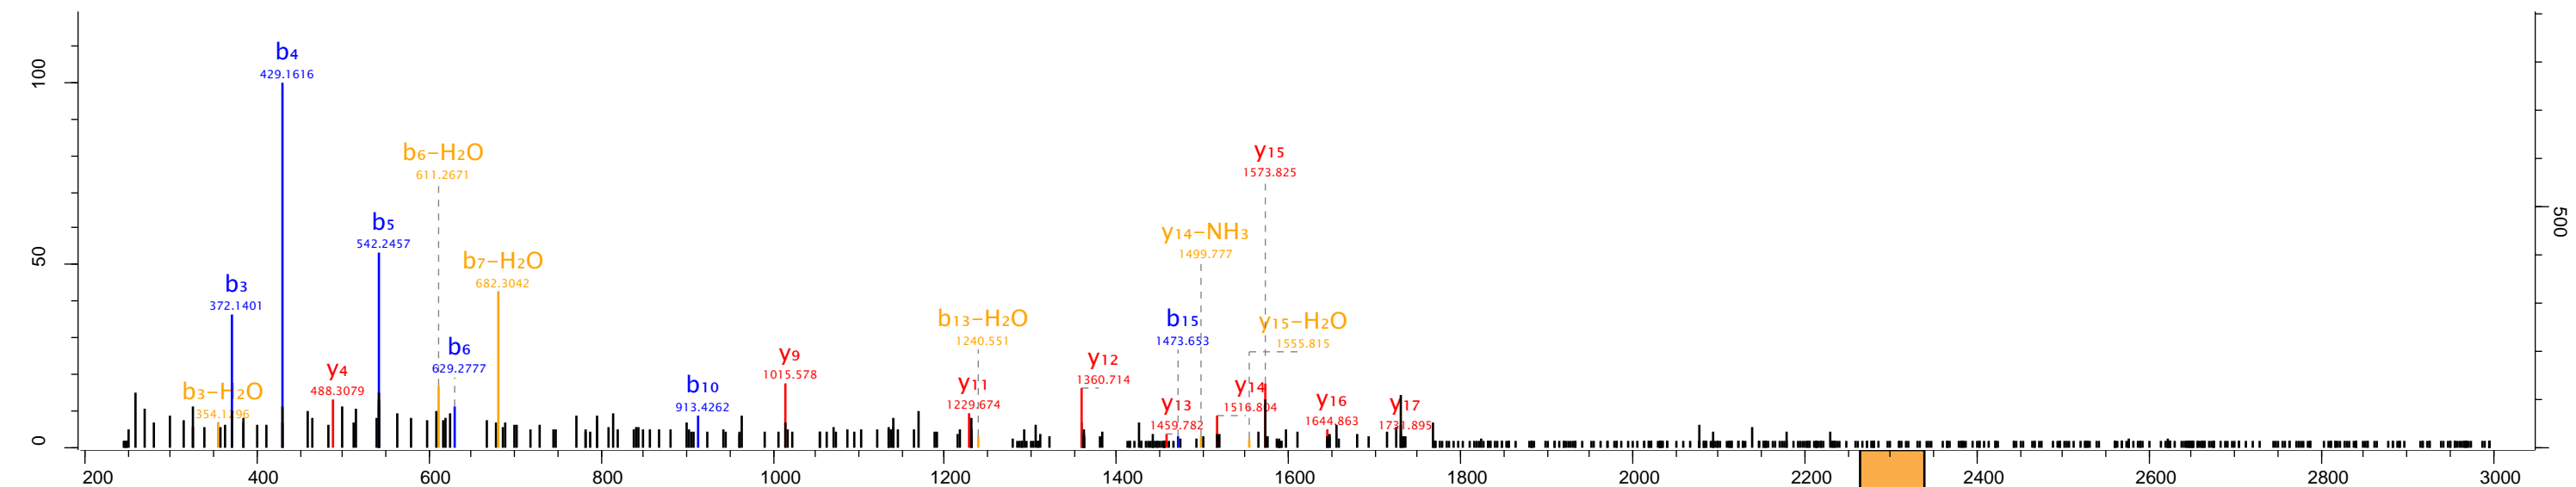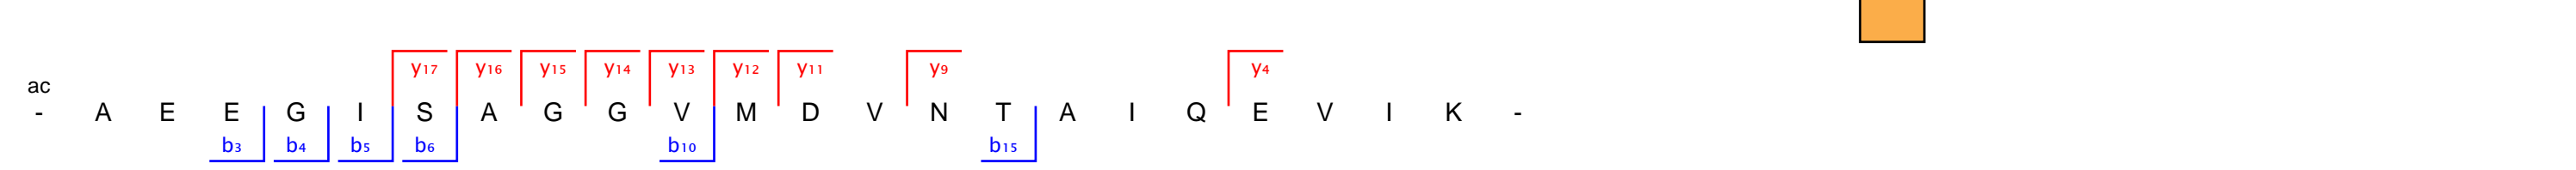

Raw file: 2014-10-22\_CL05\_Embx2dil\_4Hz  
 Scan: 3224 Method: TOF; CID Score: 40.07 m/z: 456.75

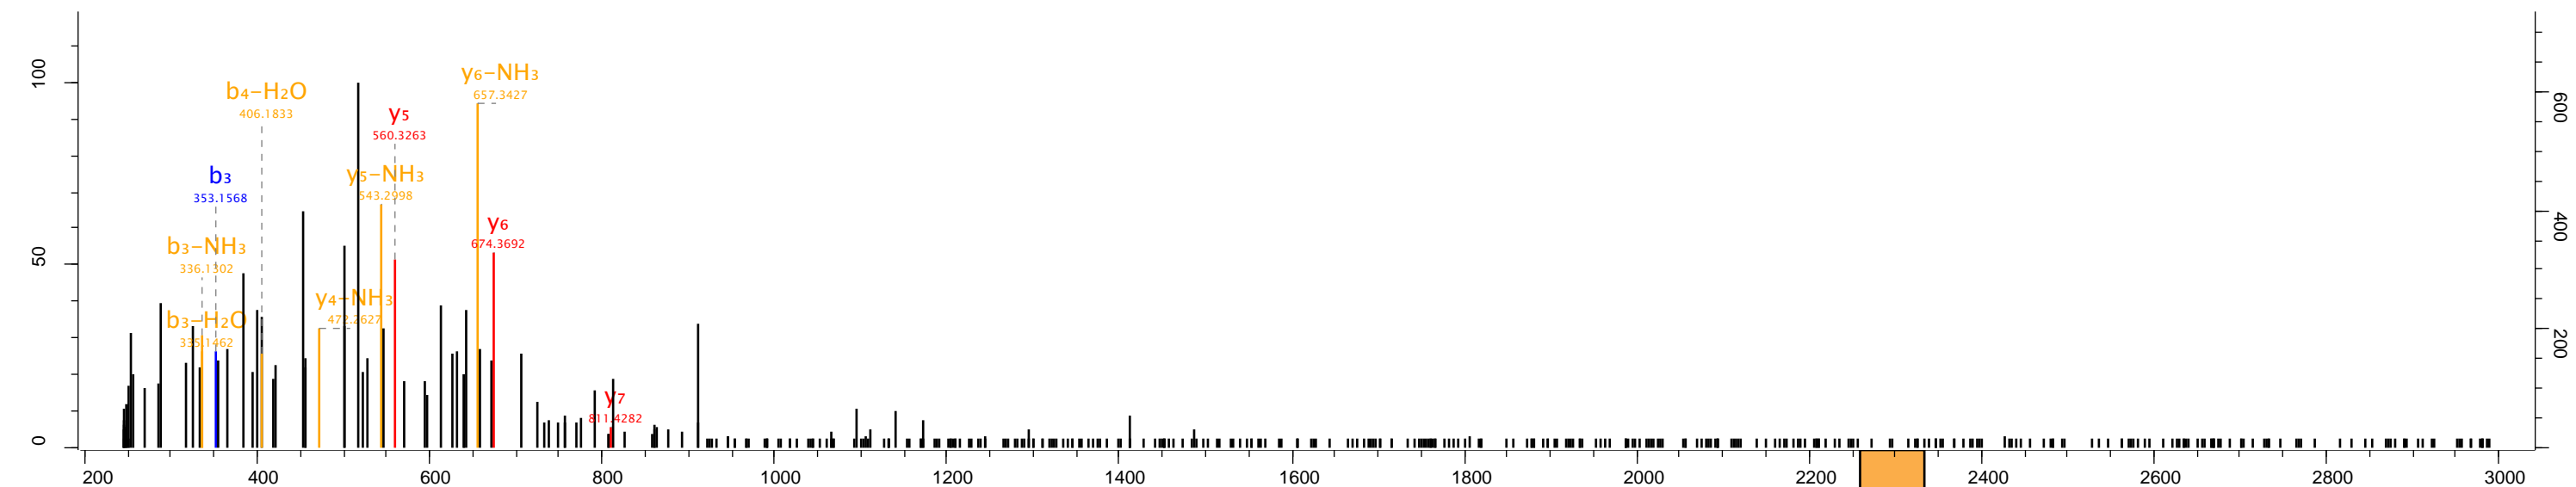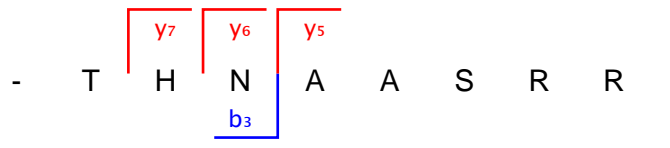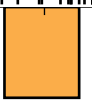



Raw file: 2014-10-22\_CL05\_Embx2dil\_4Hz  
 Scan: 3248 Method: TOF; CID Score: 88.64 m/z: 483.79

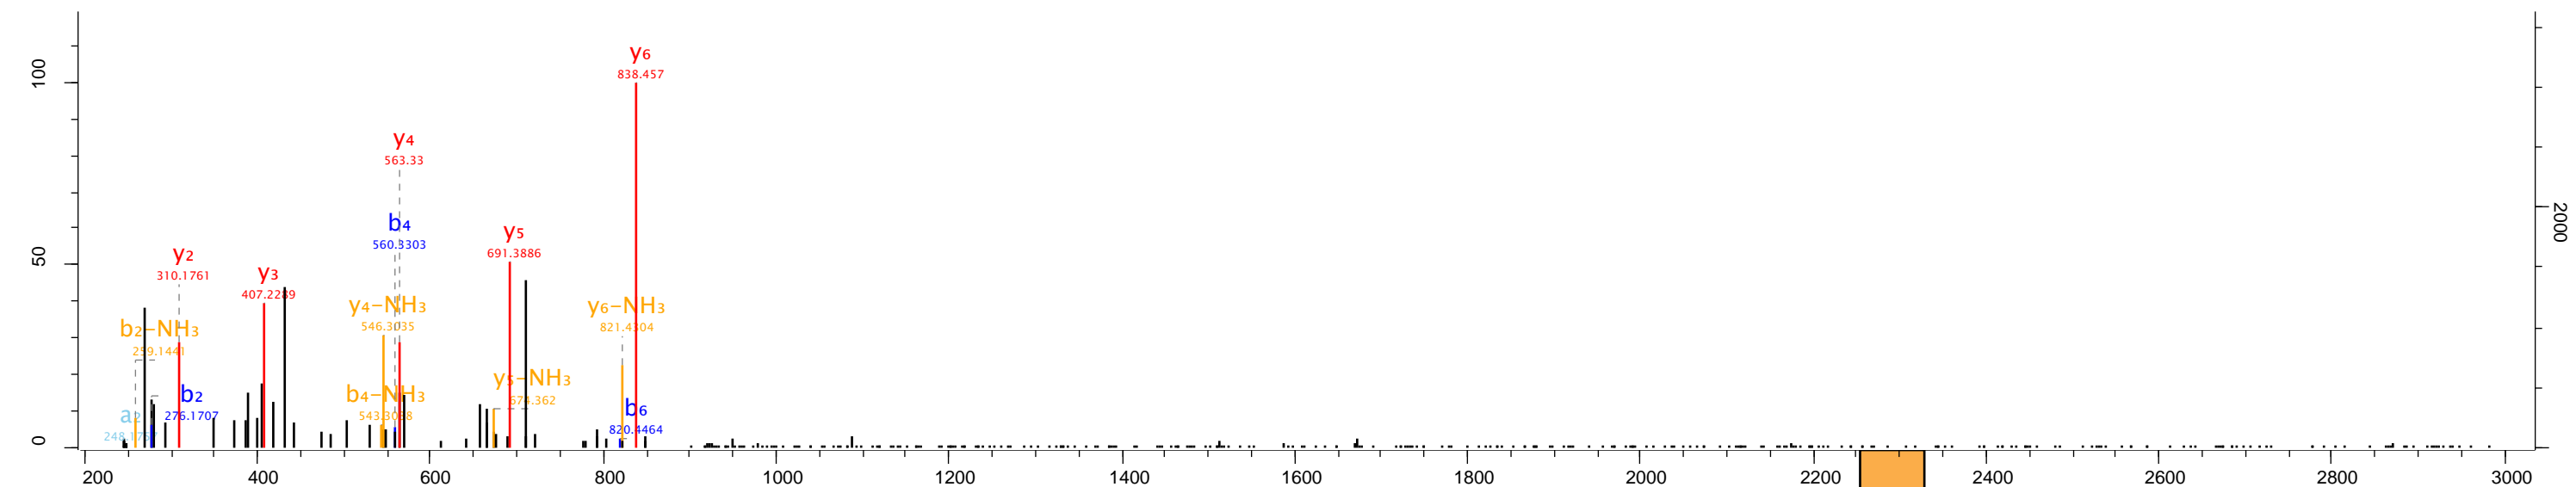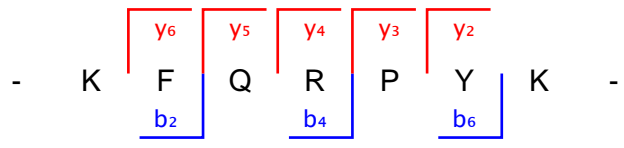

Raw file: 2014-10-22\_CL05\_Embx2dil\_4Hz  
 Scan: 3260 Method: TOF; CID Score: 86.09 m/z: 483.79

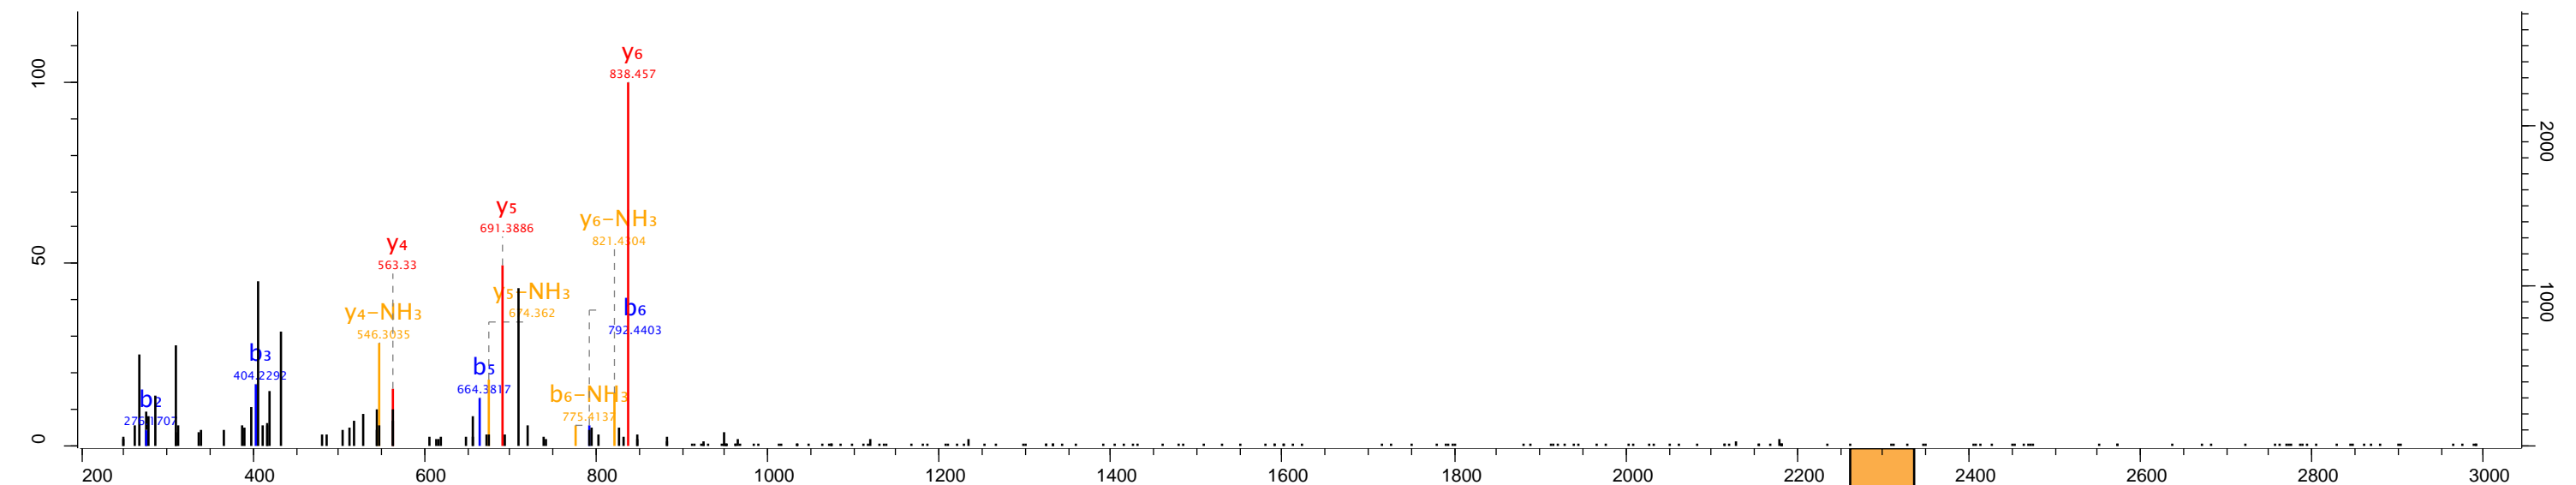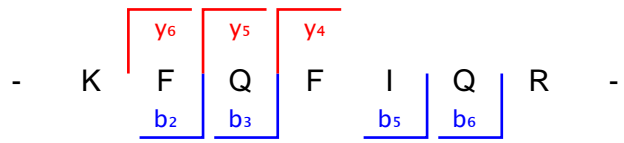

Raw file Scan Method Score m/z  
2014-10-22\_CL05\_Embx2dil\_4Hz 3609 TOF; CID 48.56 378.7

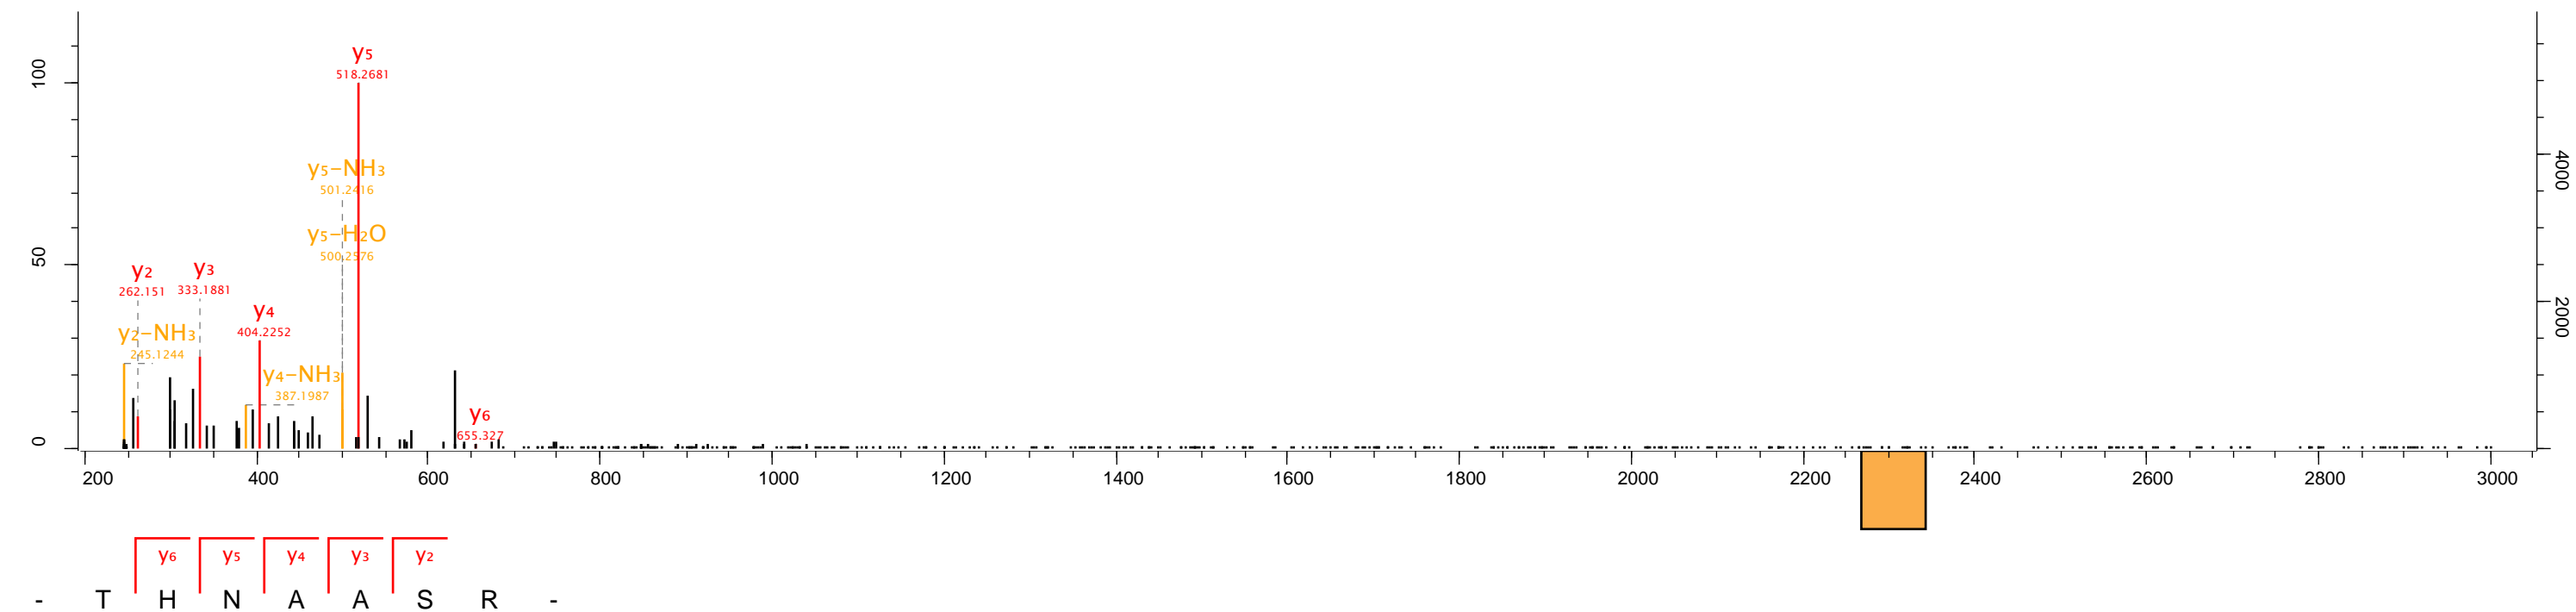

Raw file Scan Method Score m/z  
 2014-10-22\_CL05\_Embx2dil\_4Hz 3742 TOF; CID 62.71 408.28

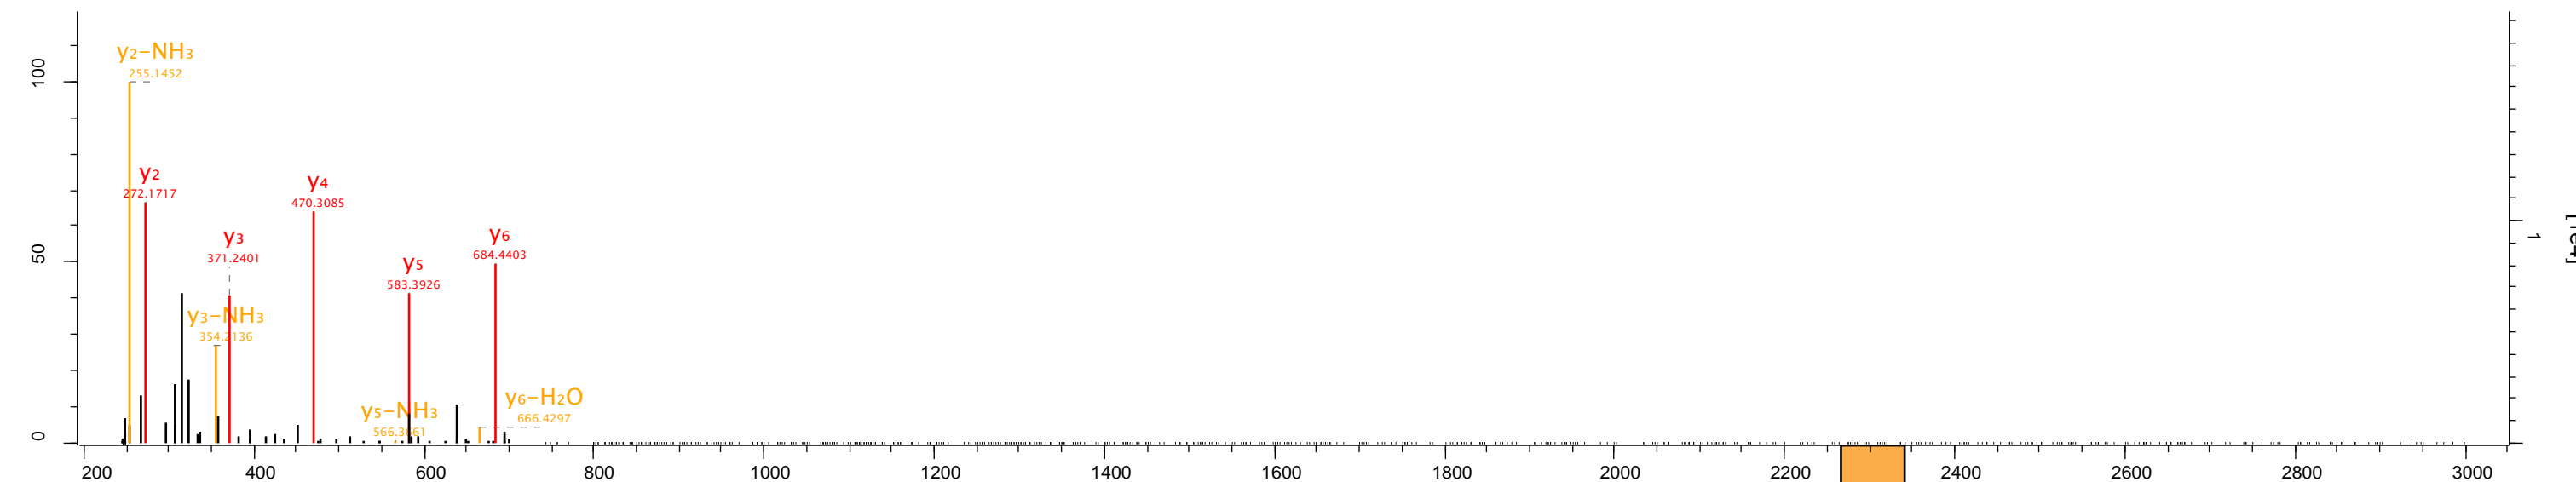

- K T I V V P R -

Diagram showing the peptide sequence: - K T I V V P R -. Brackets above the sequence indicate the fragmentation sites for the y-ions: y<sub>6</sub> (between T and I), y<sub>5</sub> (between I and V), y<sub>4</sub> (between V and V), y<sub>3</sub> (between V and P), and y<sub>2</sub> (between P and R).

Raw file: 2014-10-22\_CL05\_Embx2dil\_4Hz  
 Scan: 3969 Method: TOF; CID Score: 43.61 m/z: 541.3

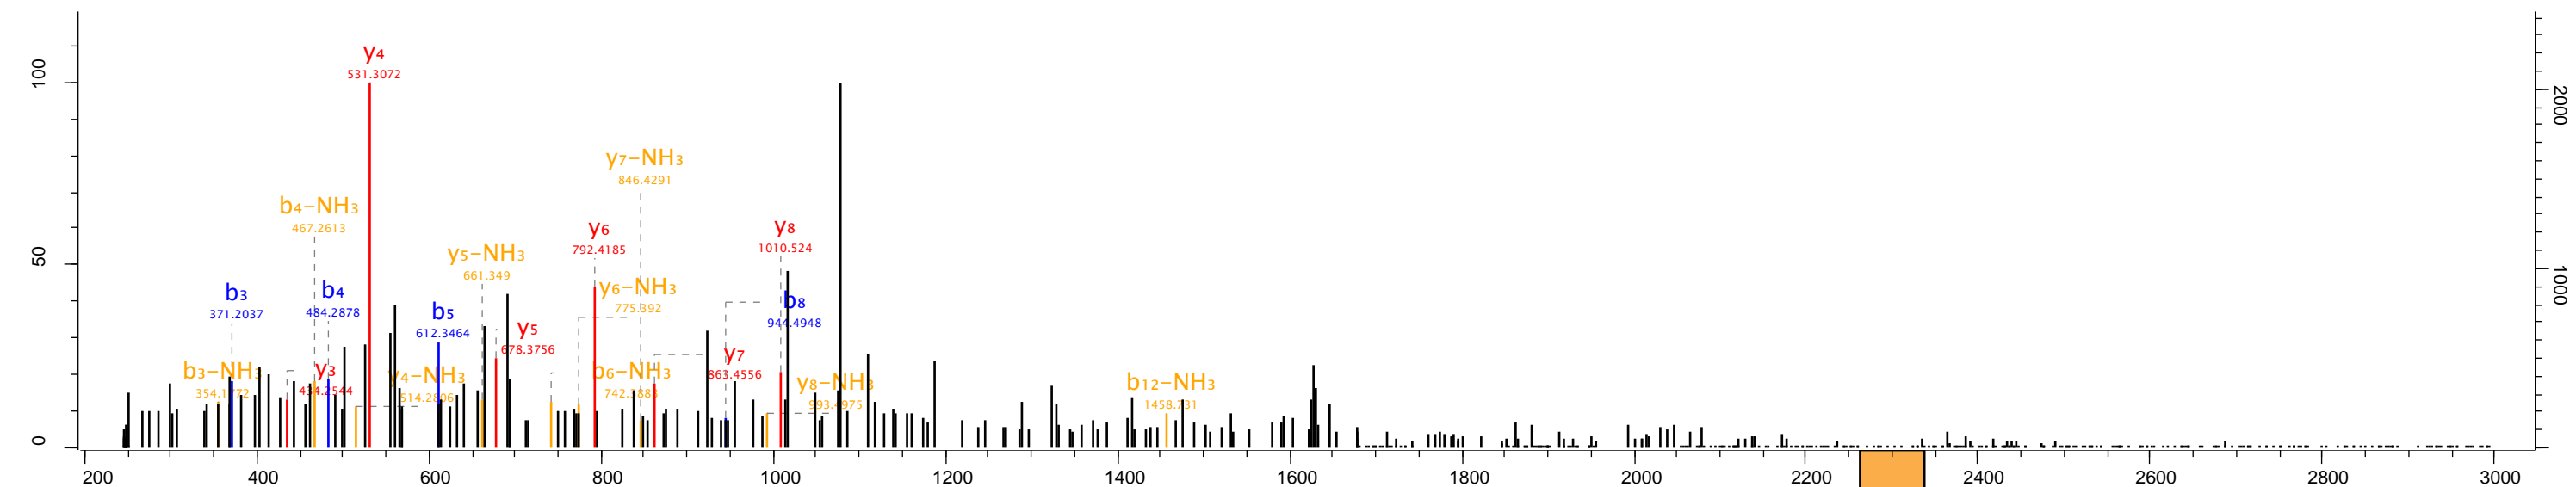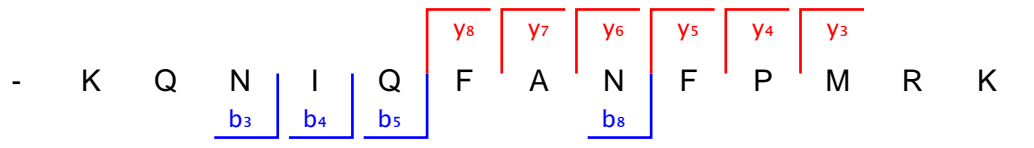

Spectral Annotation for Single-Peptide IDs in 16-cell Embryo using qQ-TOF

Raw file: 2014-10-22\_CL05\_Embx2dil\_4Hz  
 Scan: 4141  
 Method: TOF; CID  
 Score: 69.82  
 m/z: 525.79

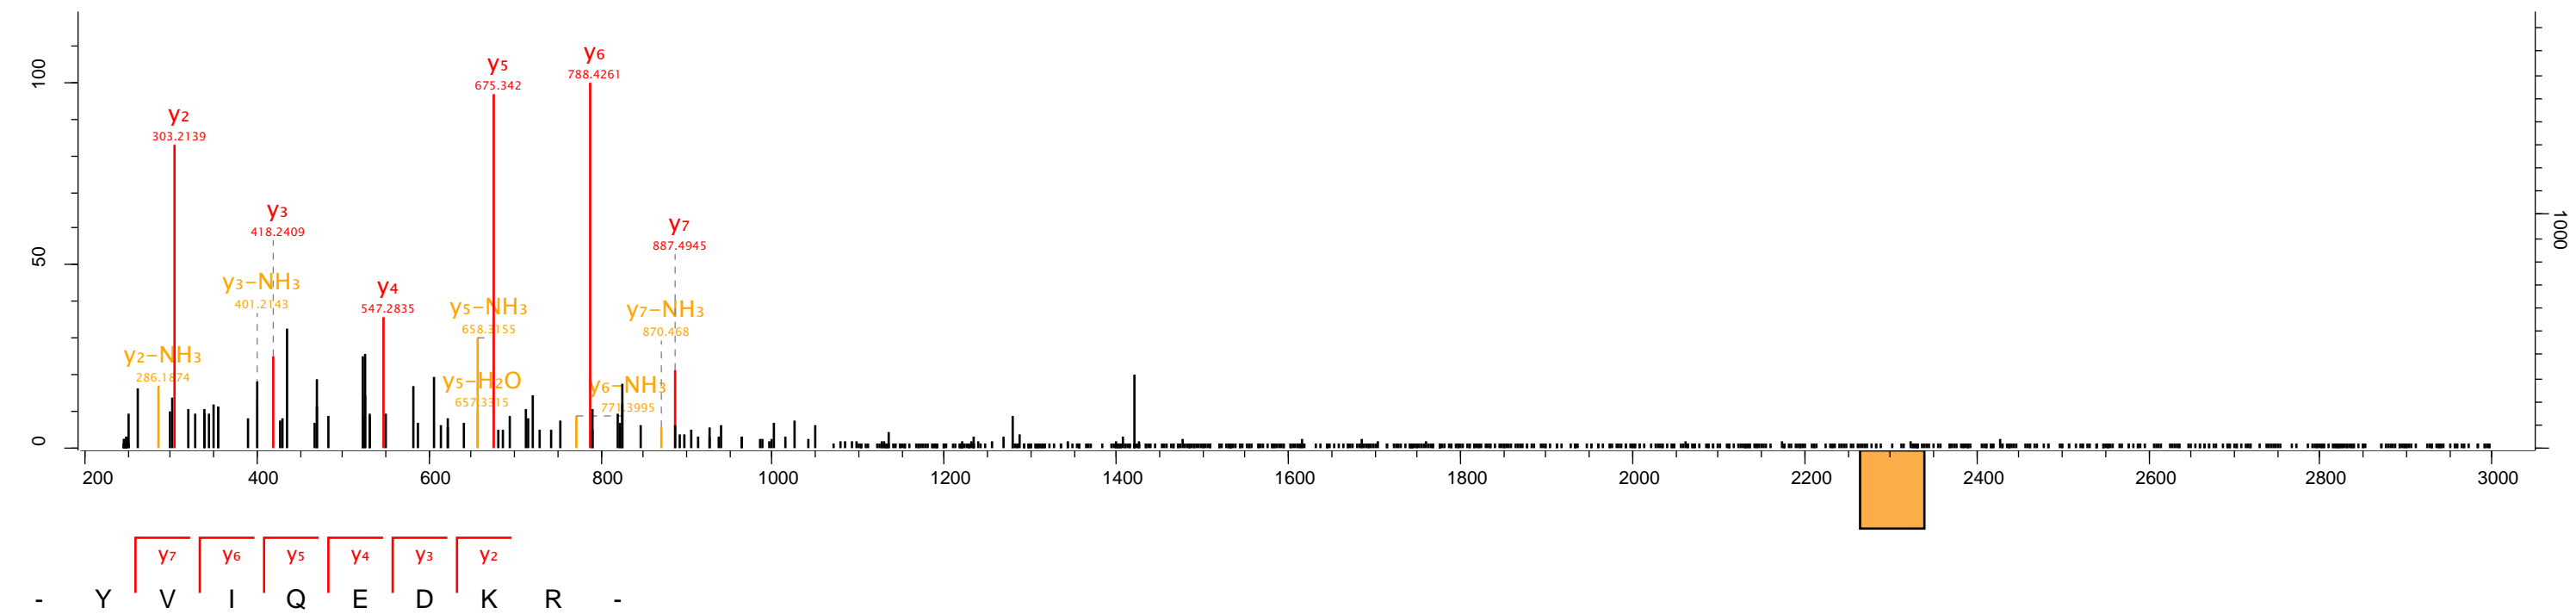

Raw file: 2014-10-22\_CL05\_Embx2dil\_4Hz  
 Scan: 4143 Method: TOF; CID Score: 33.15 m/z: 557.98

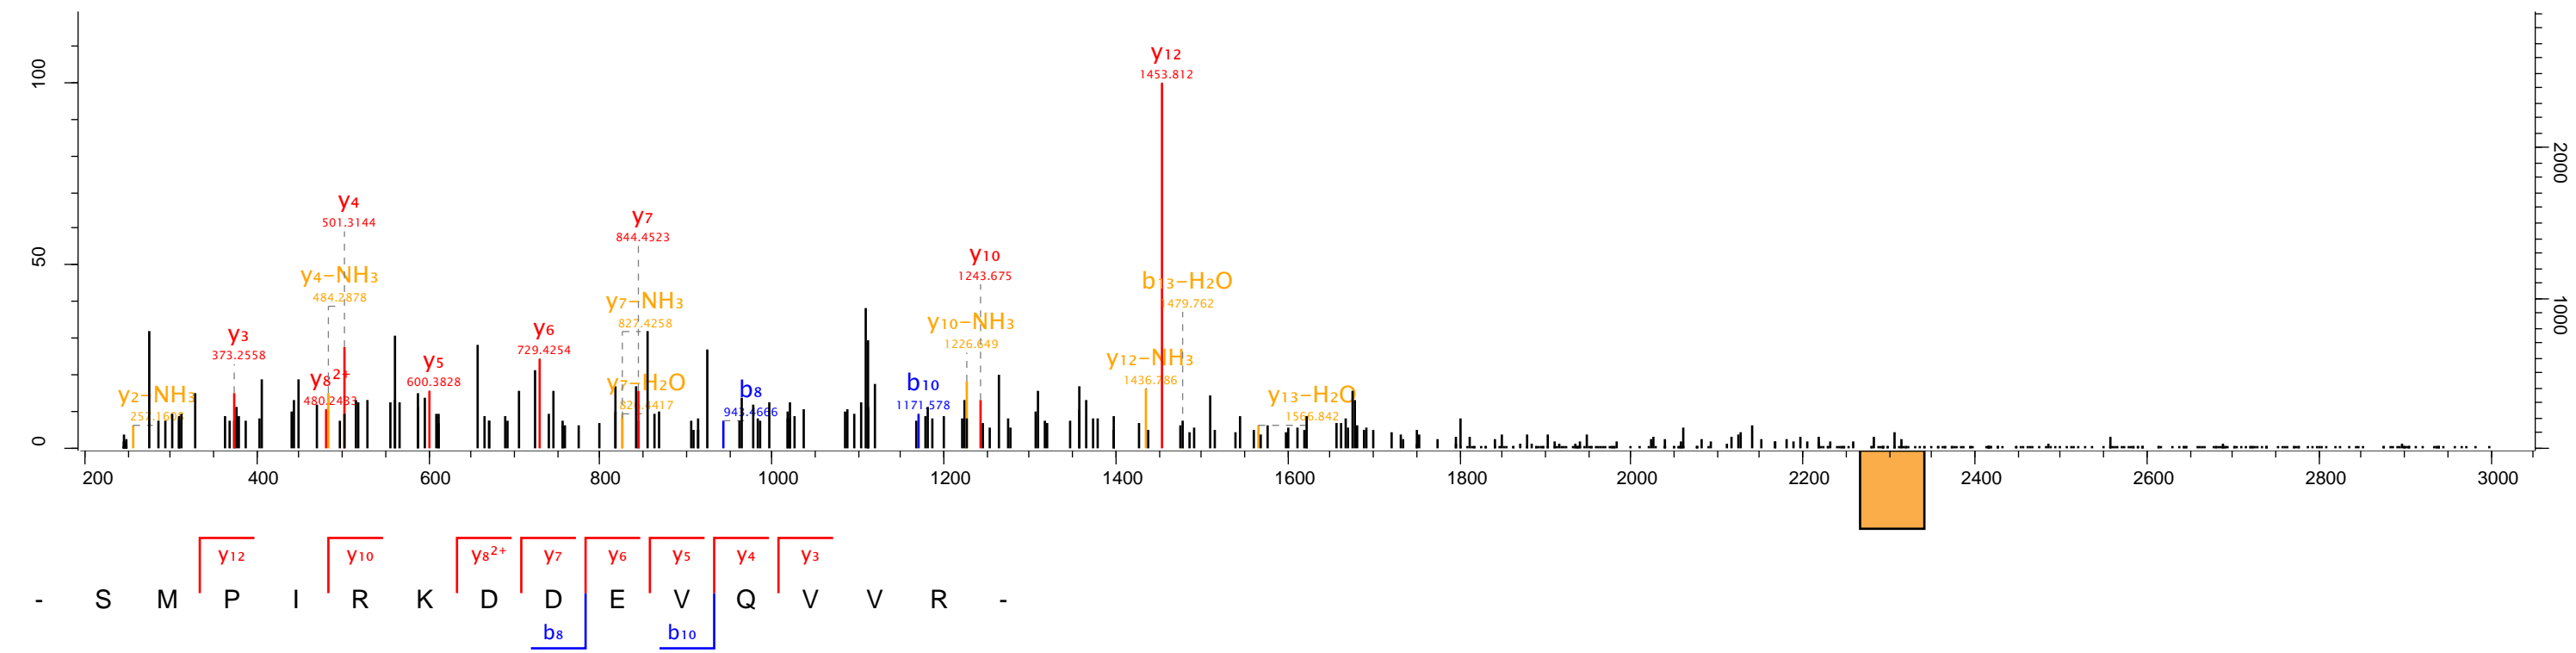

- S M P I R K D D E V Q V V R -  
 b8 b10 y12 y10 y8<sup>2+</sup> y7 y6 y5 y4 y3

Spectral Annotation for Single-Peptide IDs in 16-cell Embryo using qQ-TOF

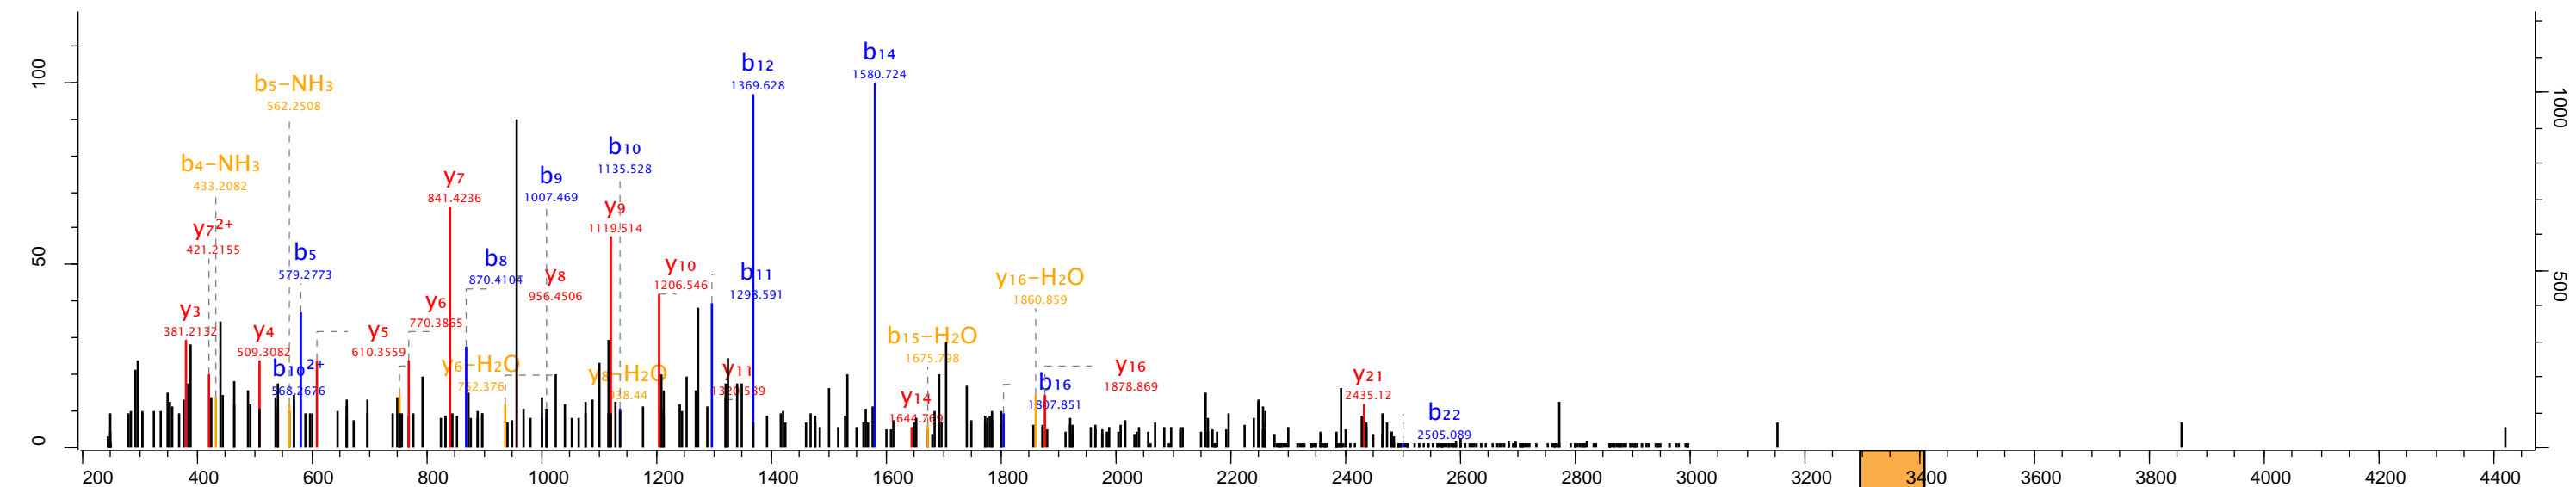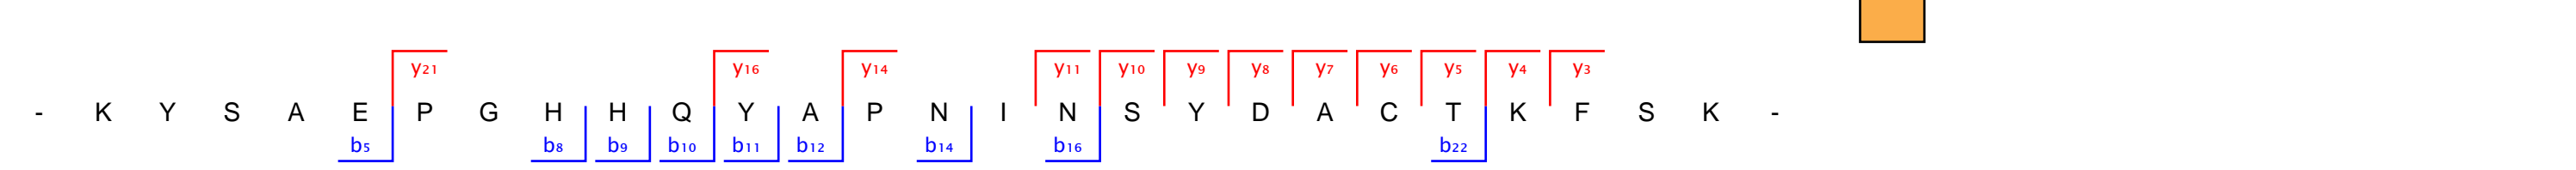



Raw file: 2014-10-22\_CL05\_Embx2dil\_4Hz  
 Scan: 4185 Method: TOF; CID Score: 53.17 m/z: 591.66

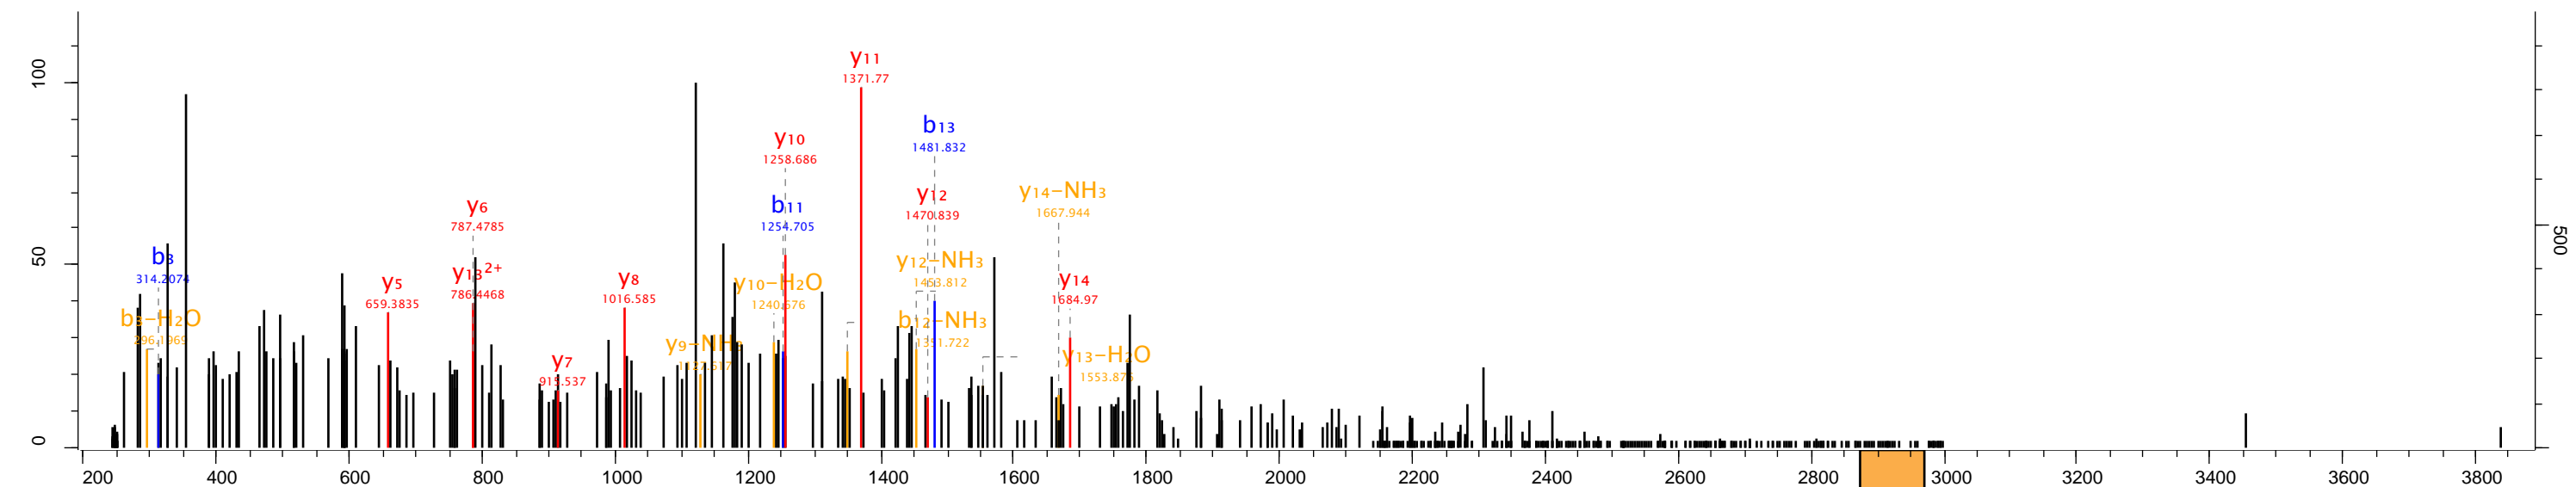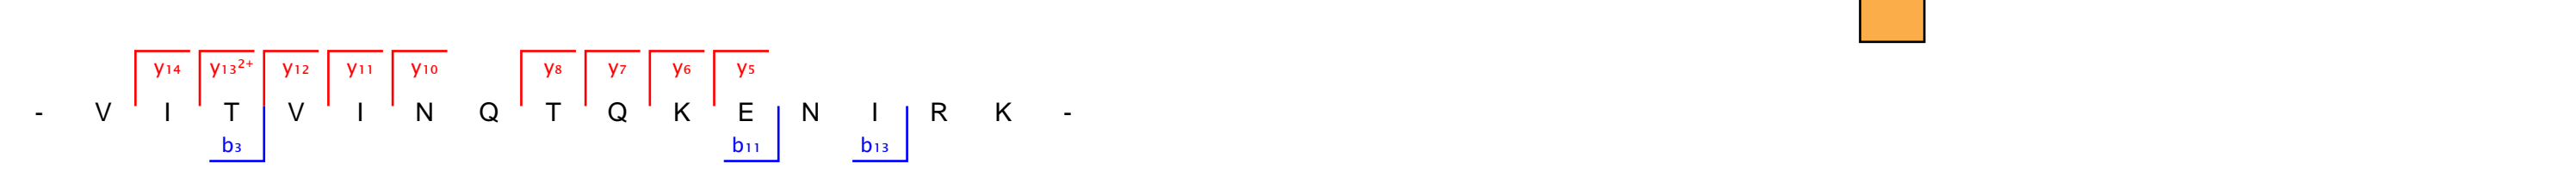

Spectral Annotation for Single-Peptide IDs in 16-cell Embryo using qQ-TOF

Raw file: 2014-10-22\_CL05\_Embx2dil\_4Hz  
 Scan: 4235 Method: TOF; CID Score: 19.98 m/z: 794.92

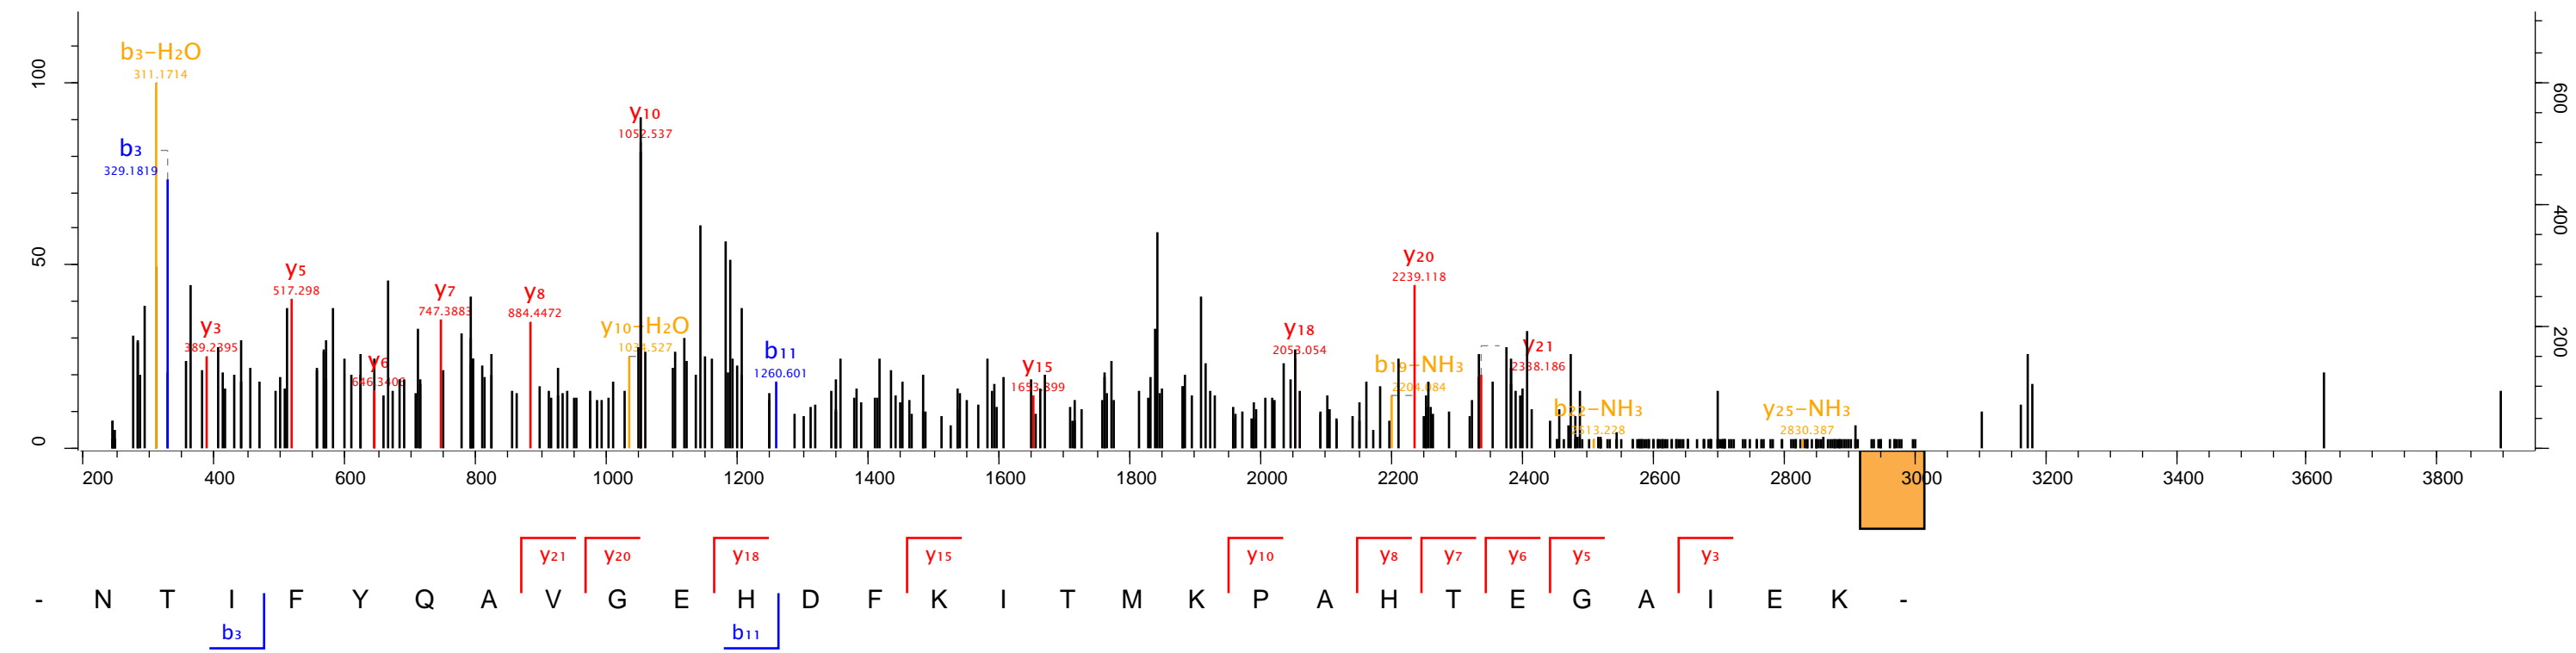

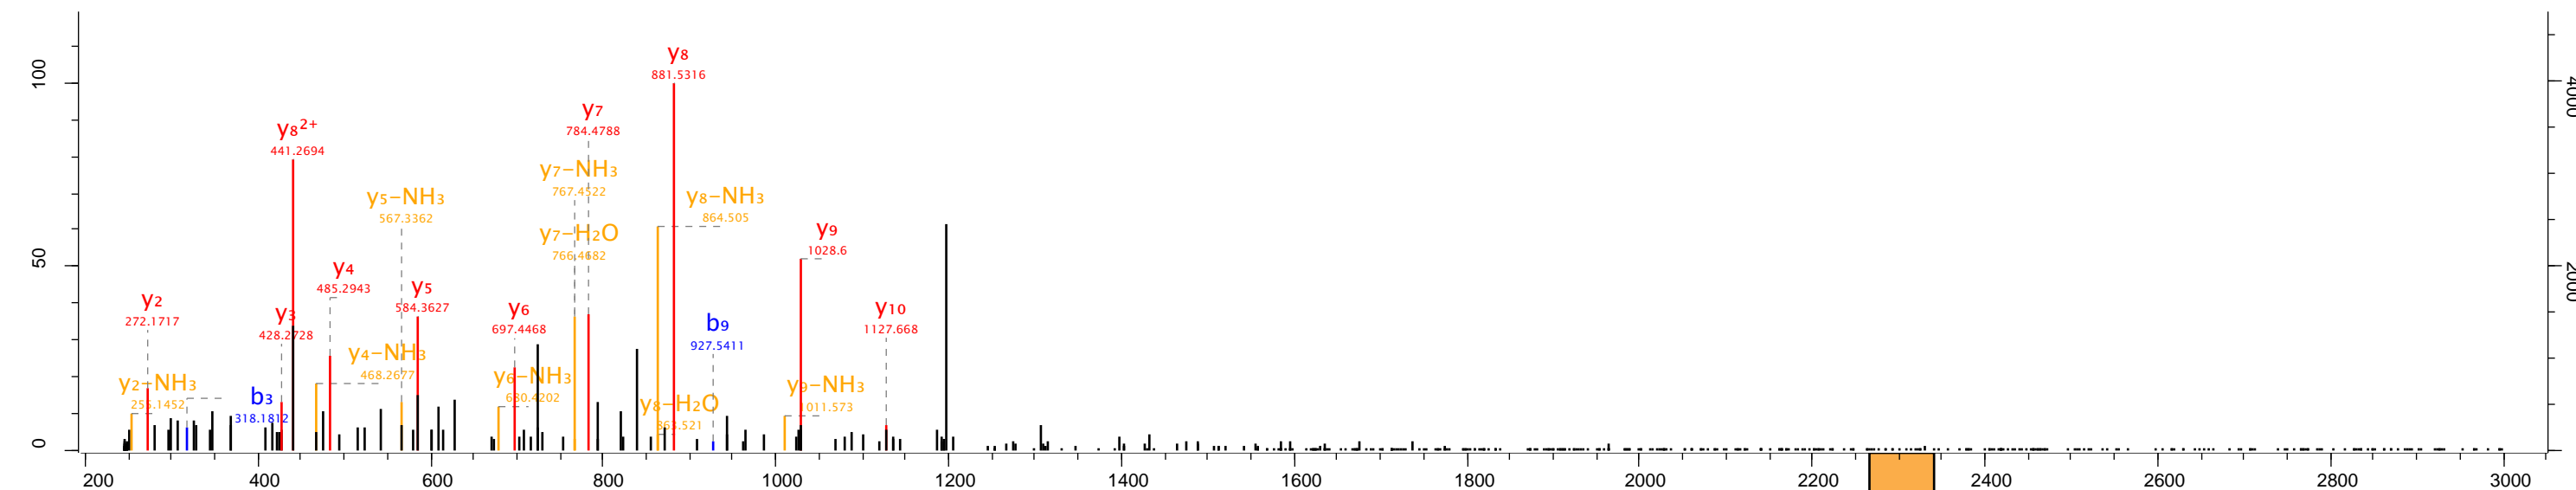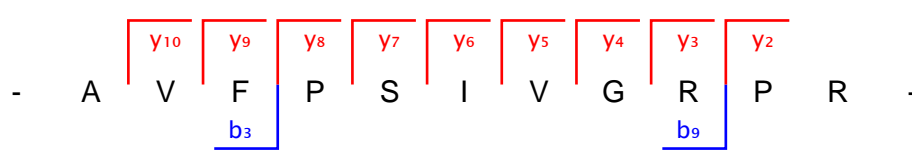

Raw file 2014-10-22\_CL05\_Embx2dil\_4Hz Scan 4337 Method TOF; CID Score 173.01 m/z 645.12

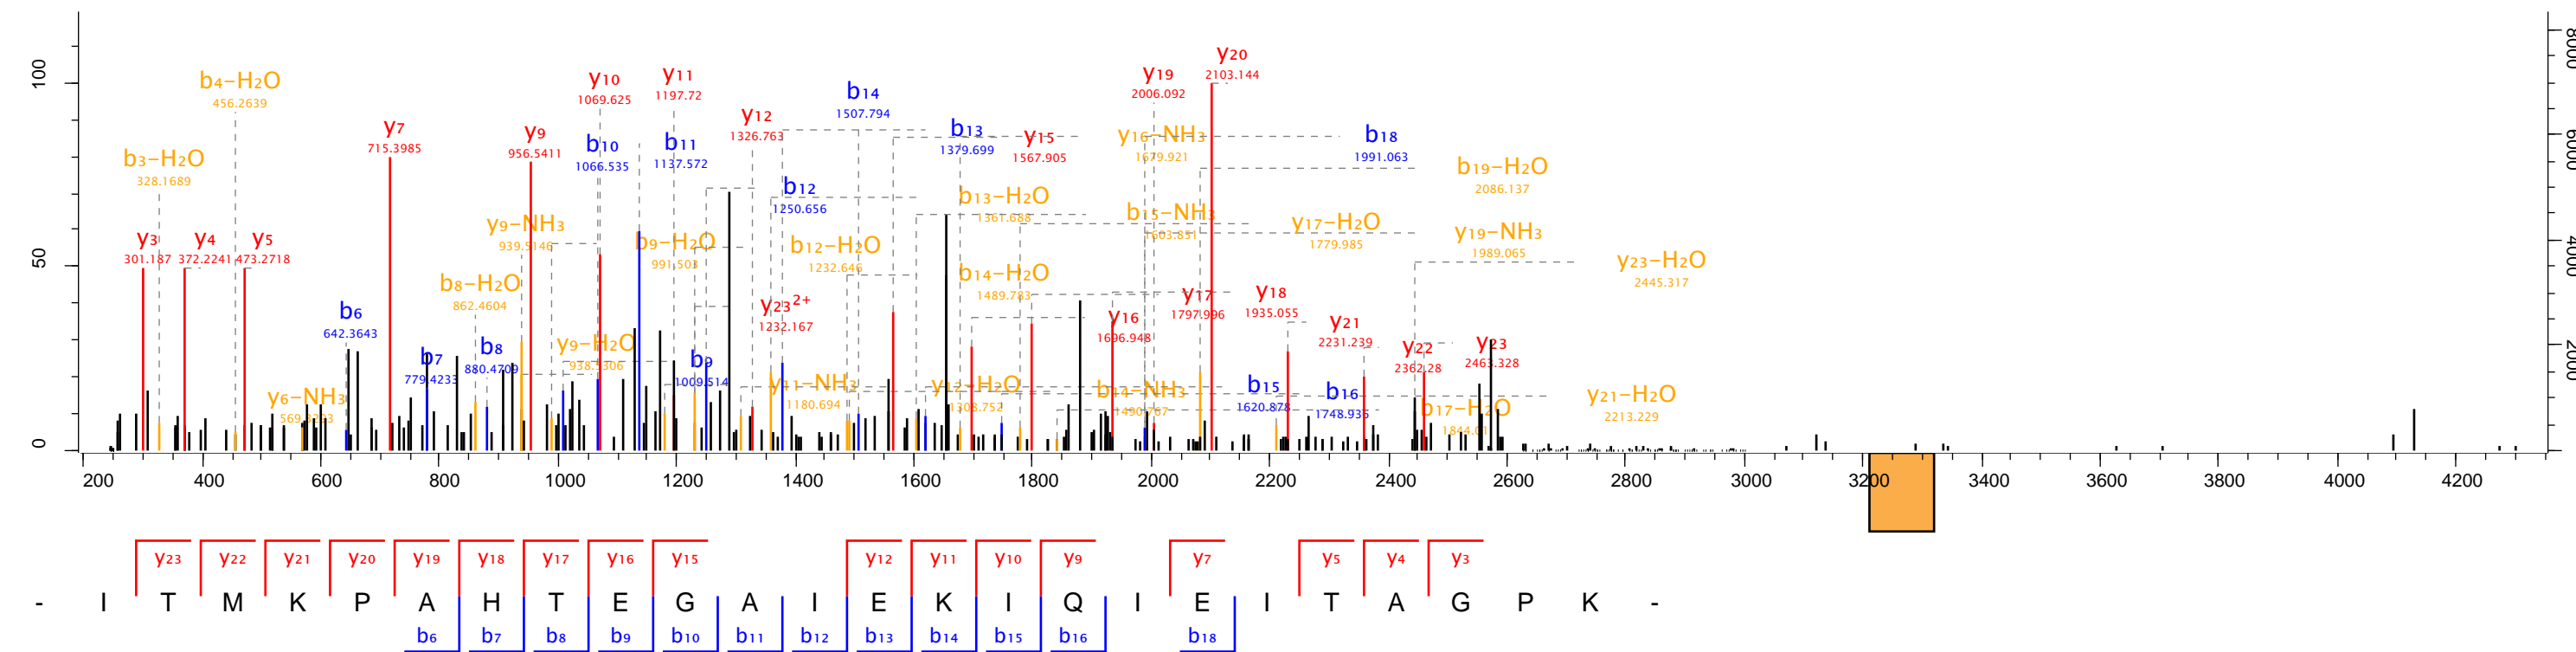

Spectral Annotation for Single-Peptide IDs in 16-cell Embryo using qQ-TOF

Raw file: 2014-10-22\_CL05\_Embx2dil\_4Hz  
 Scan: 4479 Method: TOF; CID Score: 74.61 m/z: 661.39

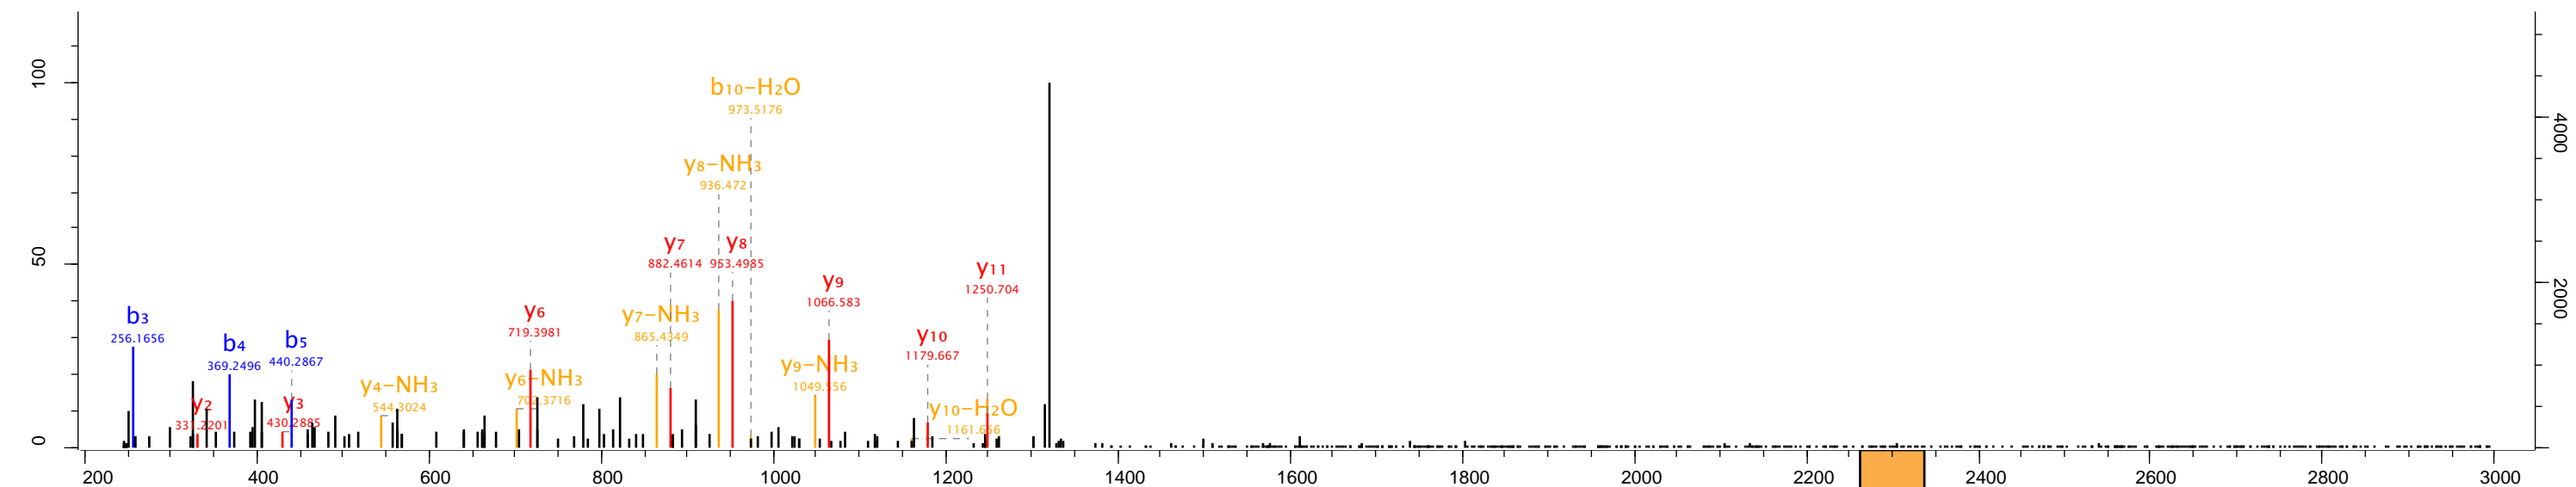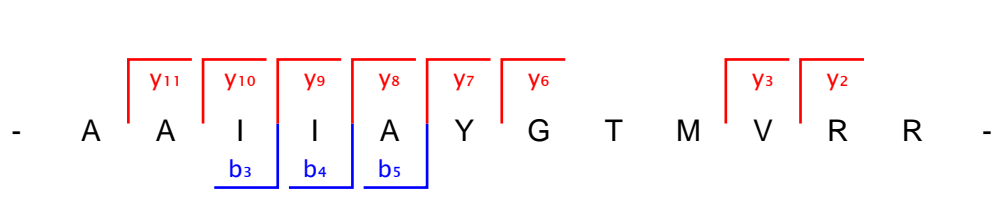

Raw file: 2014-10-22\_CL05\_Embx2dil\_4Hz  
 Scan: 4605 Method: TOF; CID Score: 35.68 m/z: 743.73

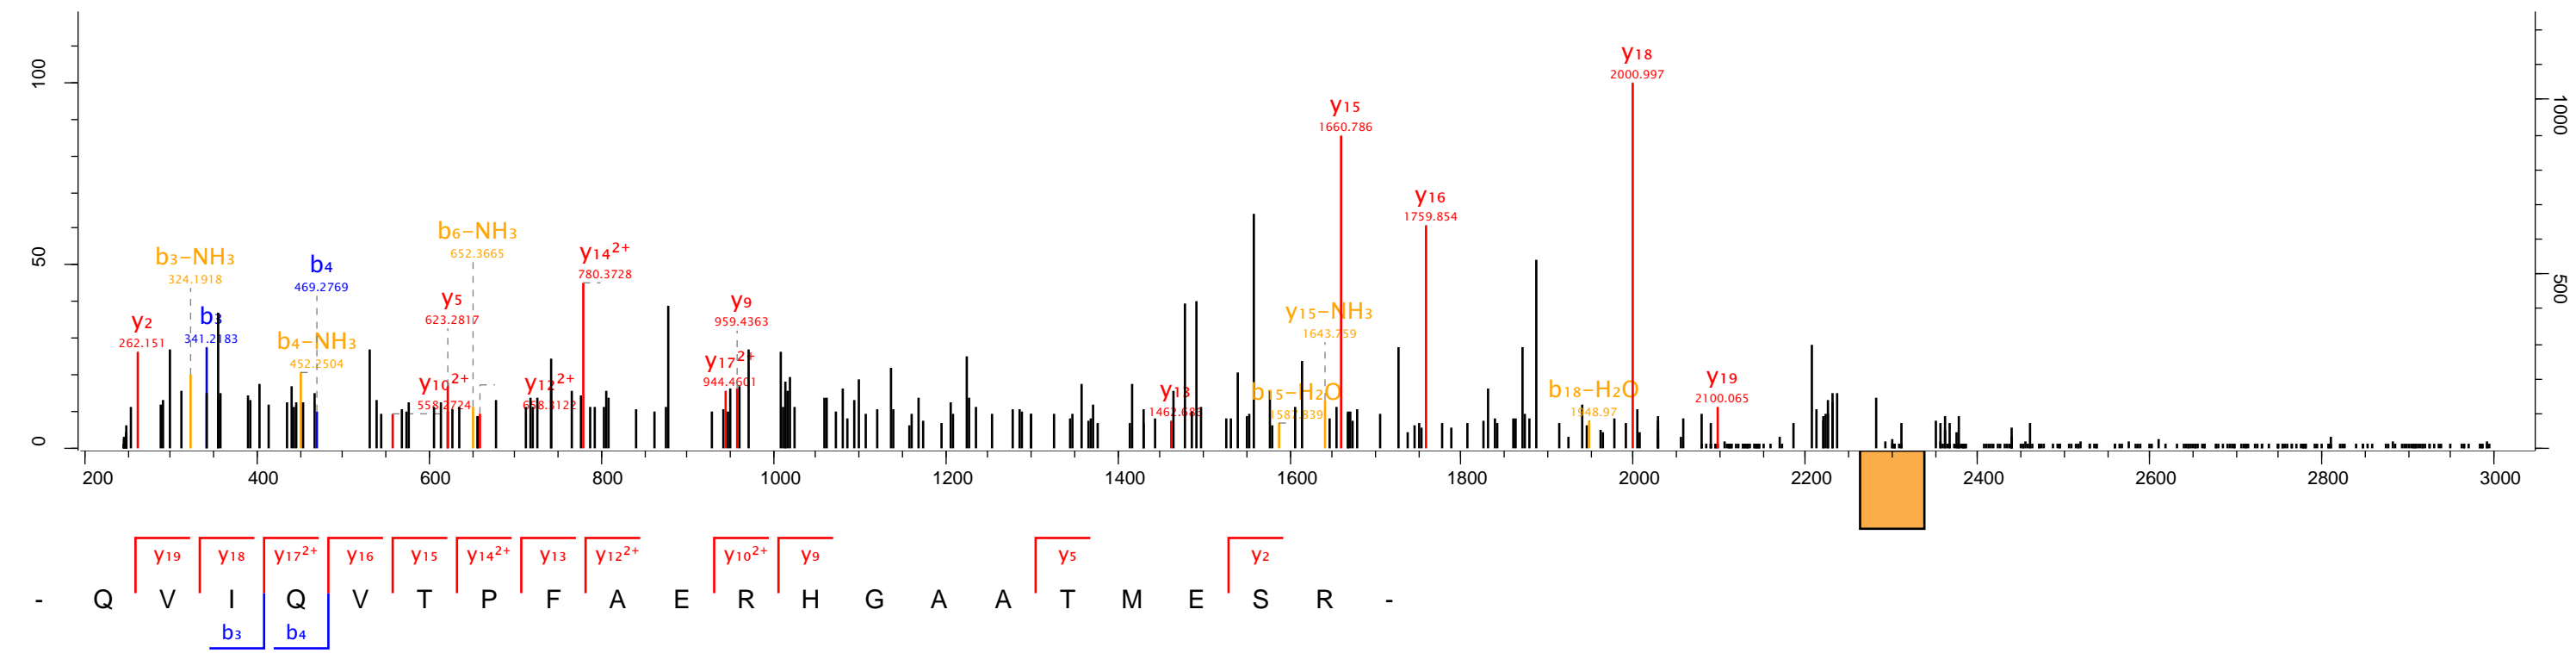

Spectral Annotation for Single-Peptide IDs in 16-cell Embryo using qQ-TOF

Raw file: 2014-10-22\_CL05\_Embx2dil\_4Hz  
 Scan: 4623 Method: TOF; CID Score: 76.33 m/z: 498.35

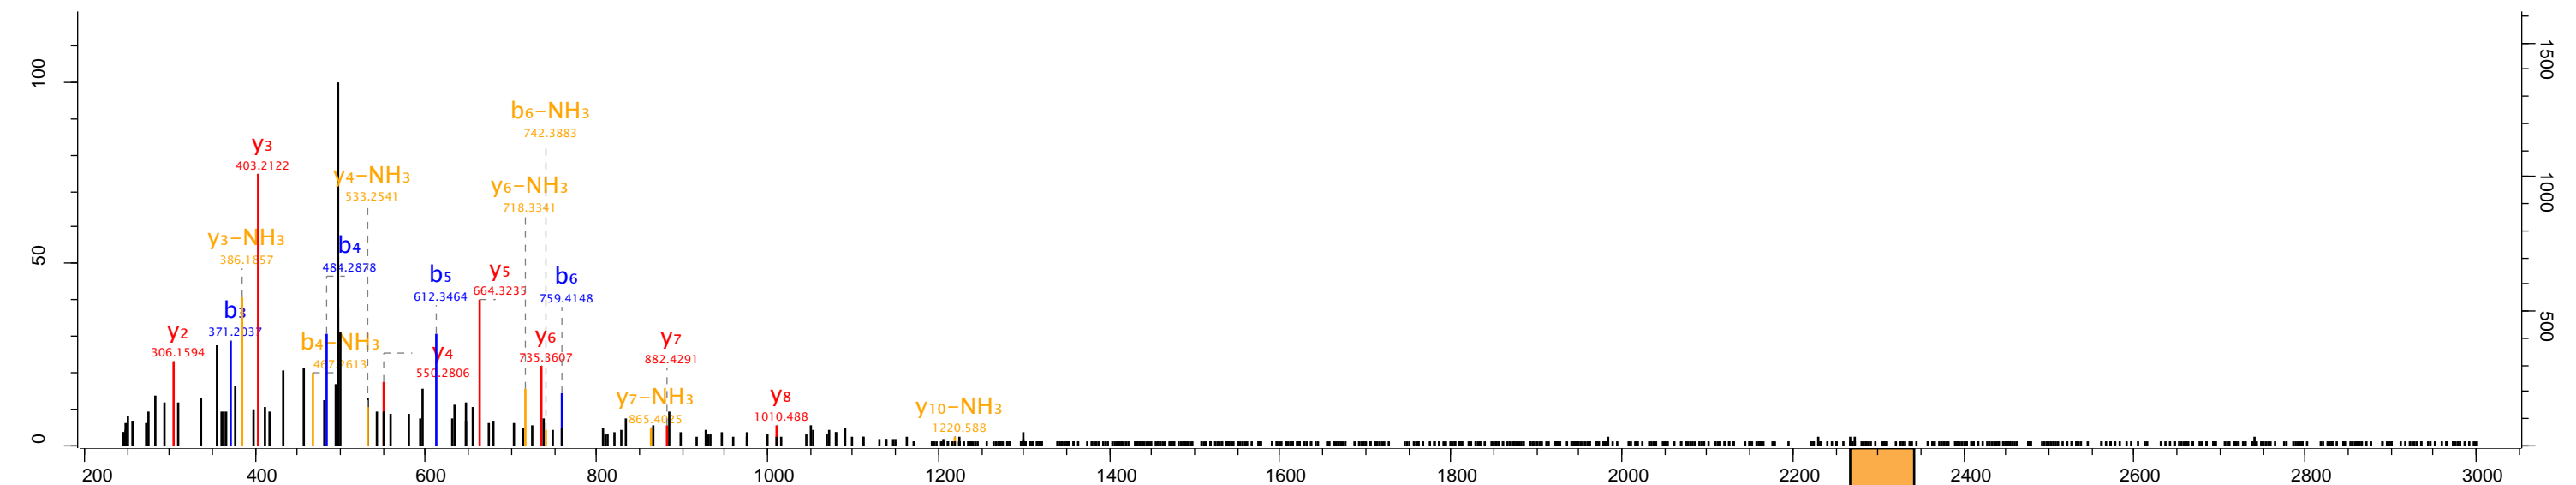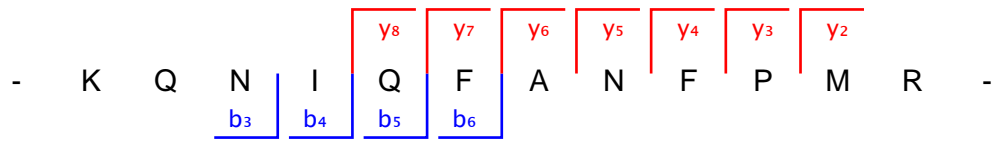

Spectral Annotation for Single-Peptide IDs in 16-cell Embryo using qQ-TOF

Raw file 2014-10-22\_CL05\_Embx2dil\_4Hz Scan 4637 Method TOF; CID Score 46.07 m/z 677.83

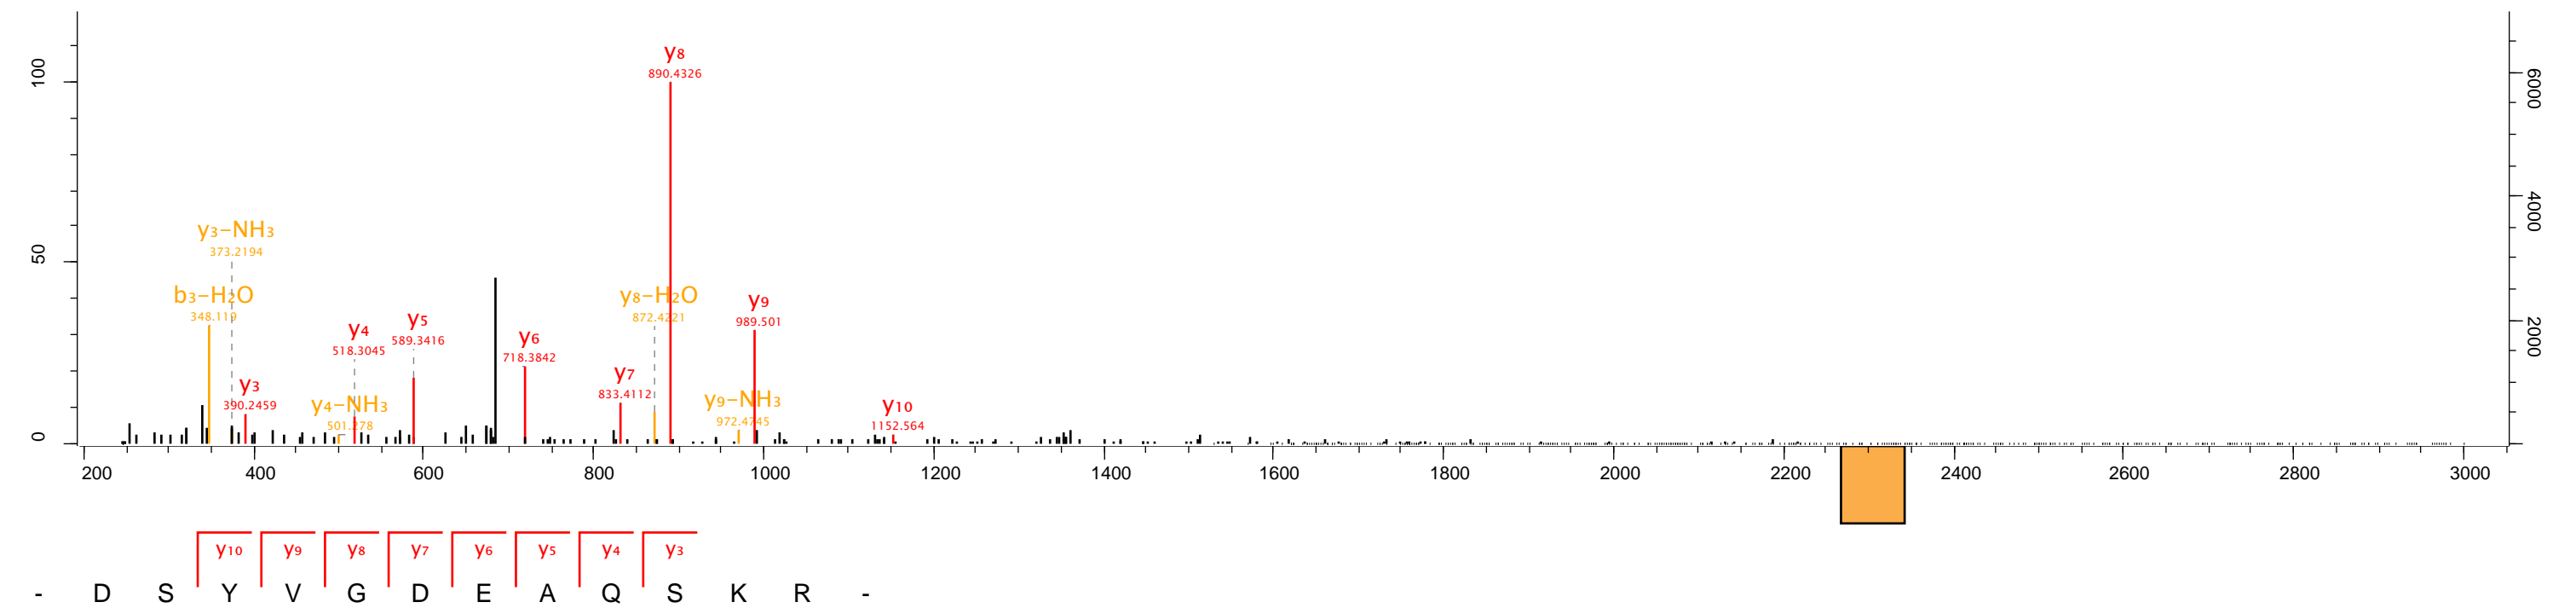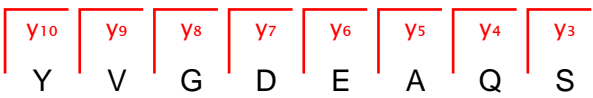



Raw file: 2014-10-22\_CL05\_Embx2dil\_4Hz  
 Scan: 4647 Method: TOF; CID Score: 169.62 m/z: 760.71

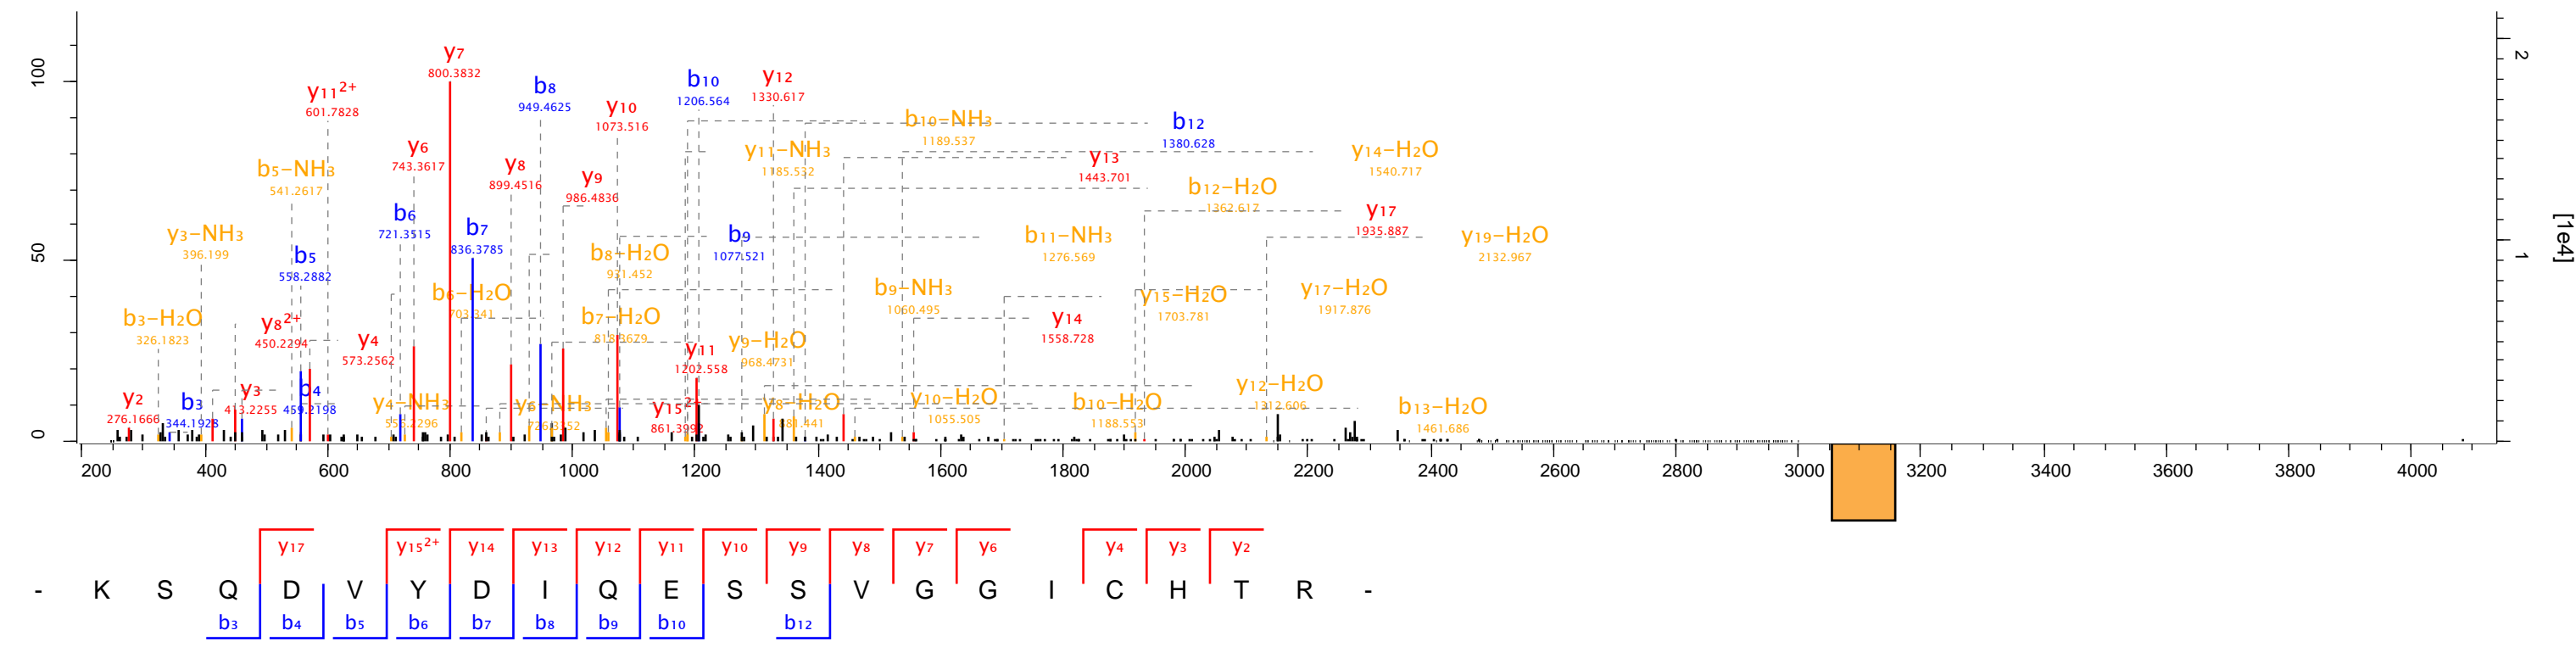

Spectral Annotation for Single-Peptide IDs in 16-cell Embryo using qQ-TOF

Raw file 2014-10-22\_CL05\_Embx2dil\_4Hz Scan 4718 Method TOF; CID Score 168.64 m/z 798.77

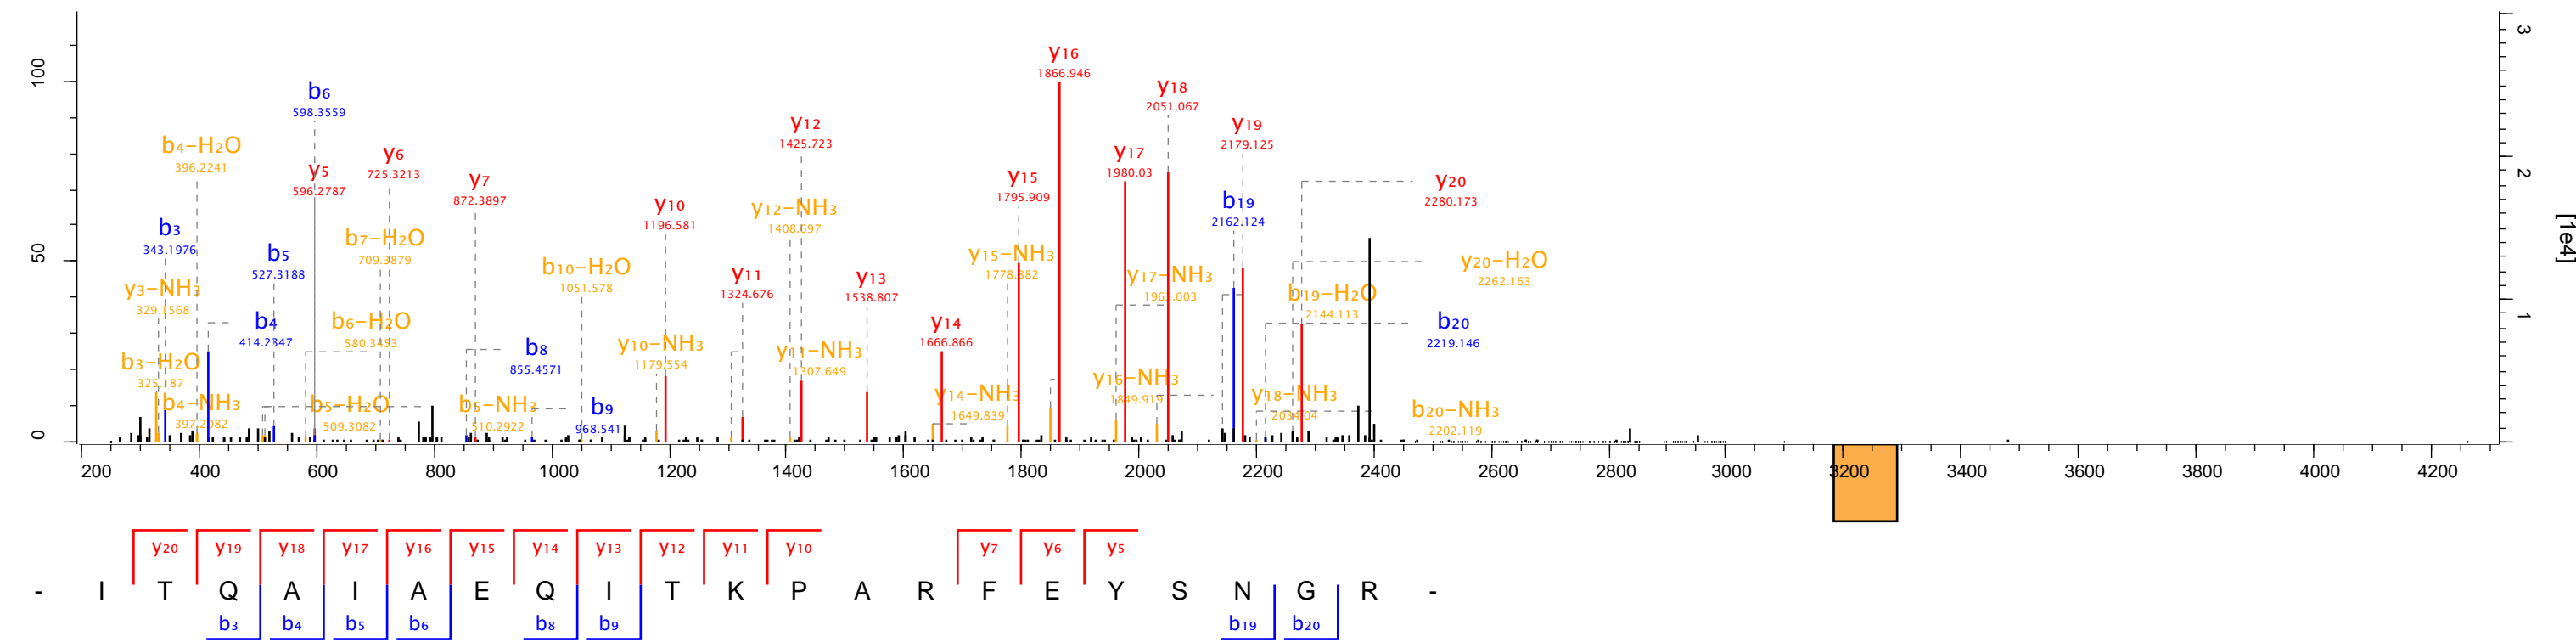

Spectral Annotation for Single-Peptide IDs in 16-cell Embryo using qQ-TOF

Raw file: 2014-10-22\_CL05\_Embx2dil\_4Hz  
 Scan: 4727 Method: TOF; CID Score: 110.38 m/z: 514.91

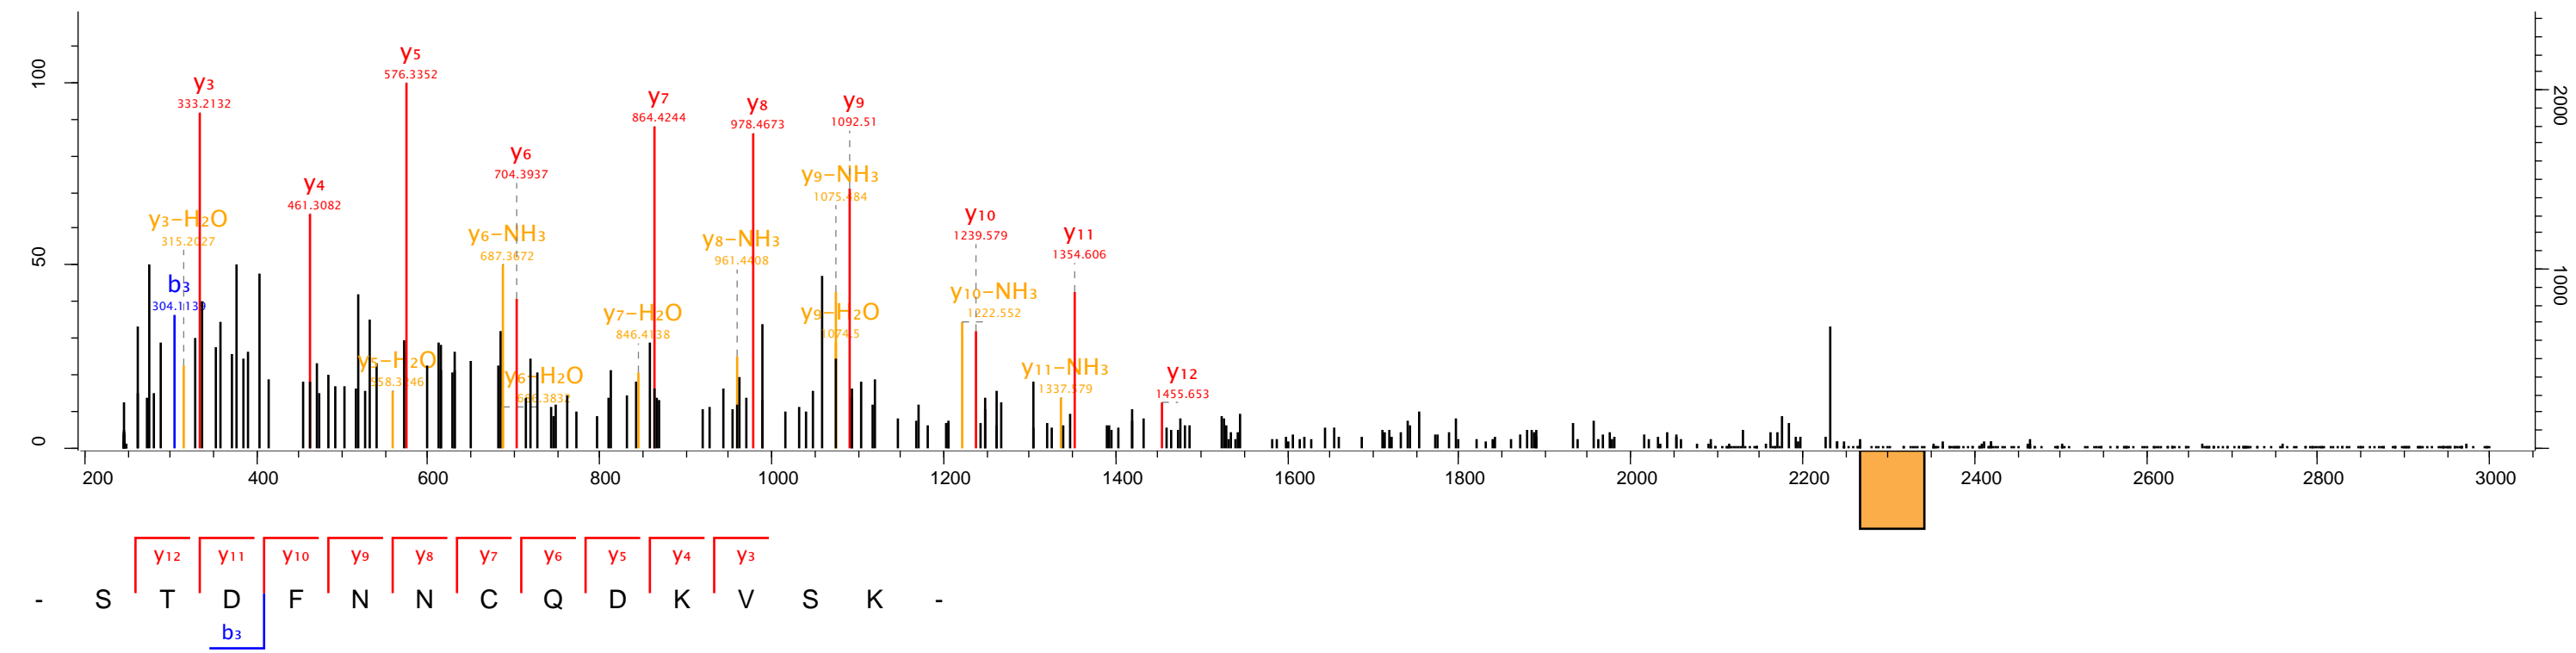

Spectral Annotation for Single-Peptide IDs in 16-cell Embryo using qQ-TOF

Raw file 2014-10-22\_CL05\_Embx2dil\_4Hz  
 Scan 4854 Method TOF; CID Score 83.37 m/z 766.91

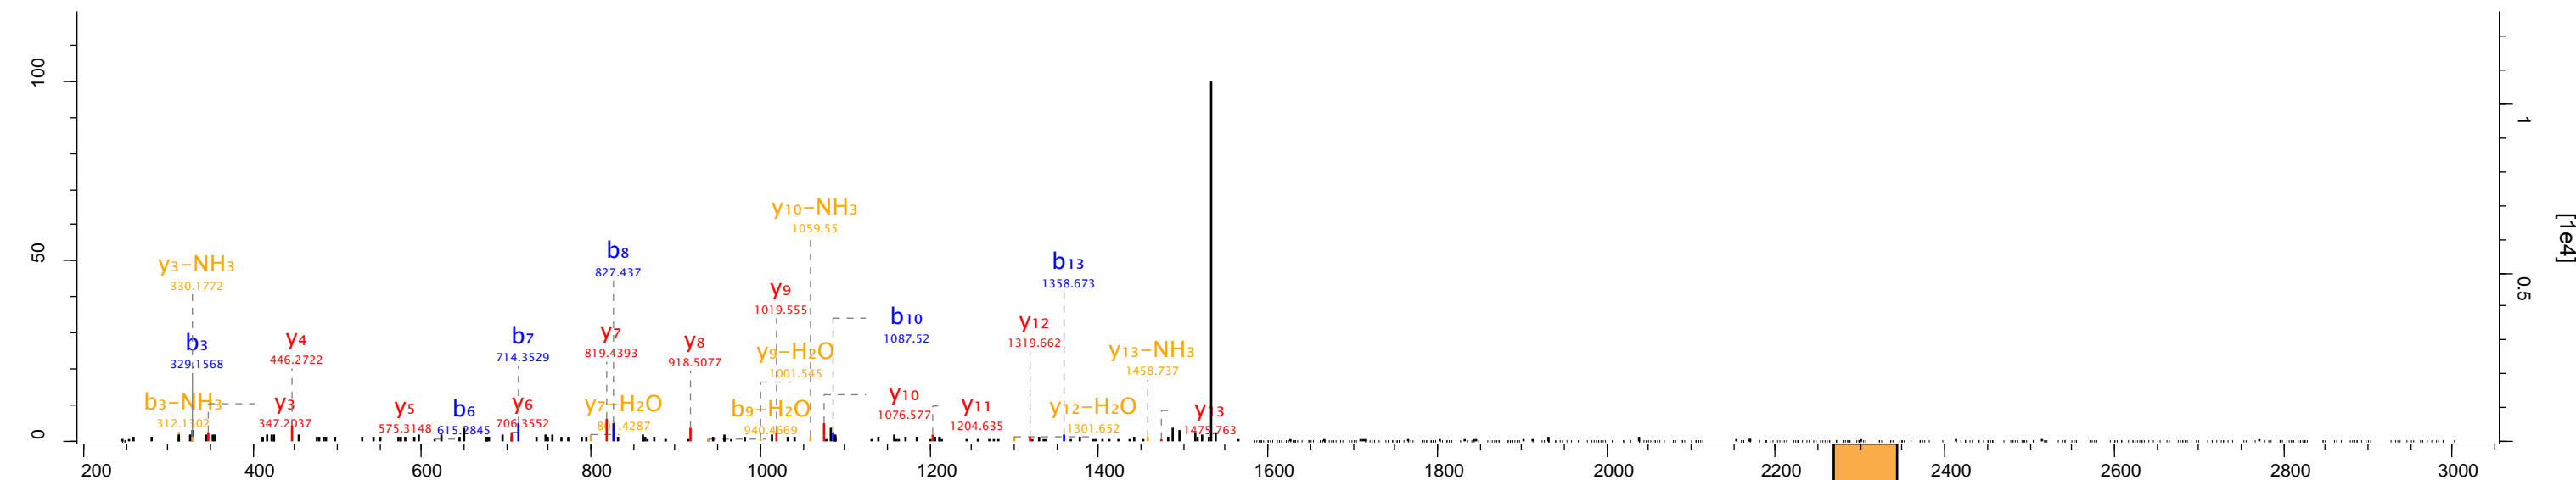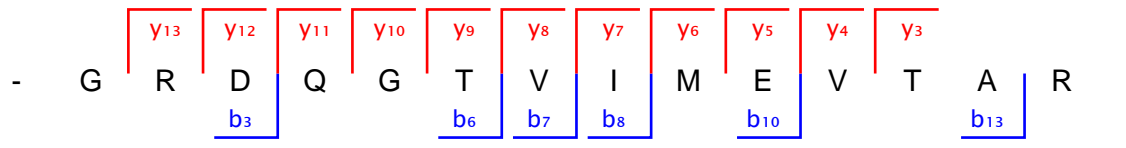

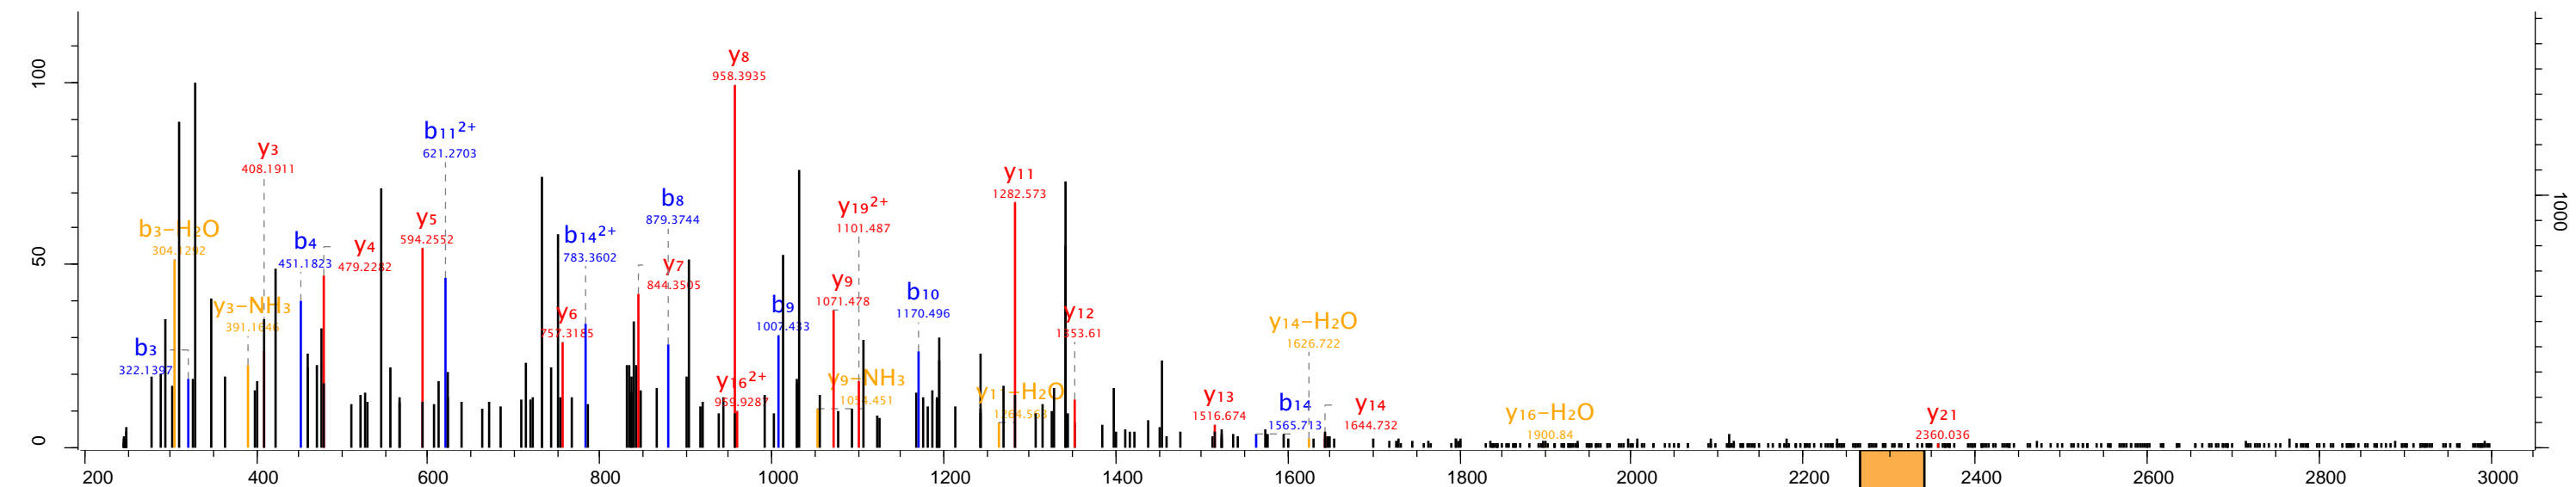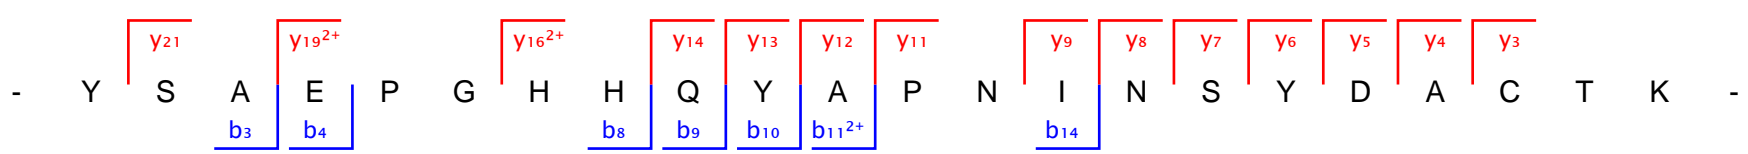

Raw file 2014-10-22\_CL05\_Embx2dil\_4Hz Scan 5071 Method TOF; CID Score 102.08 m/z 845.5

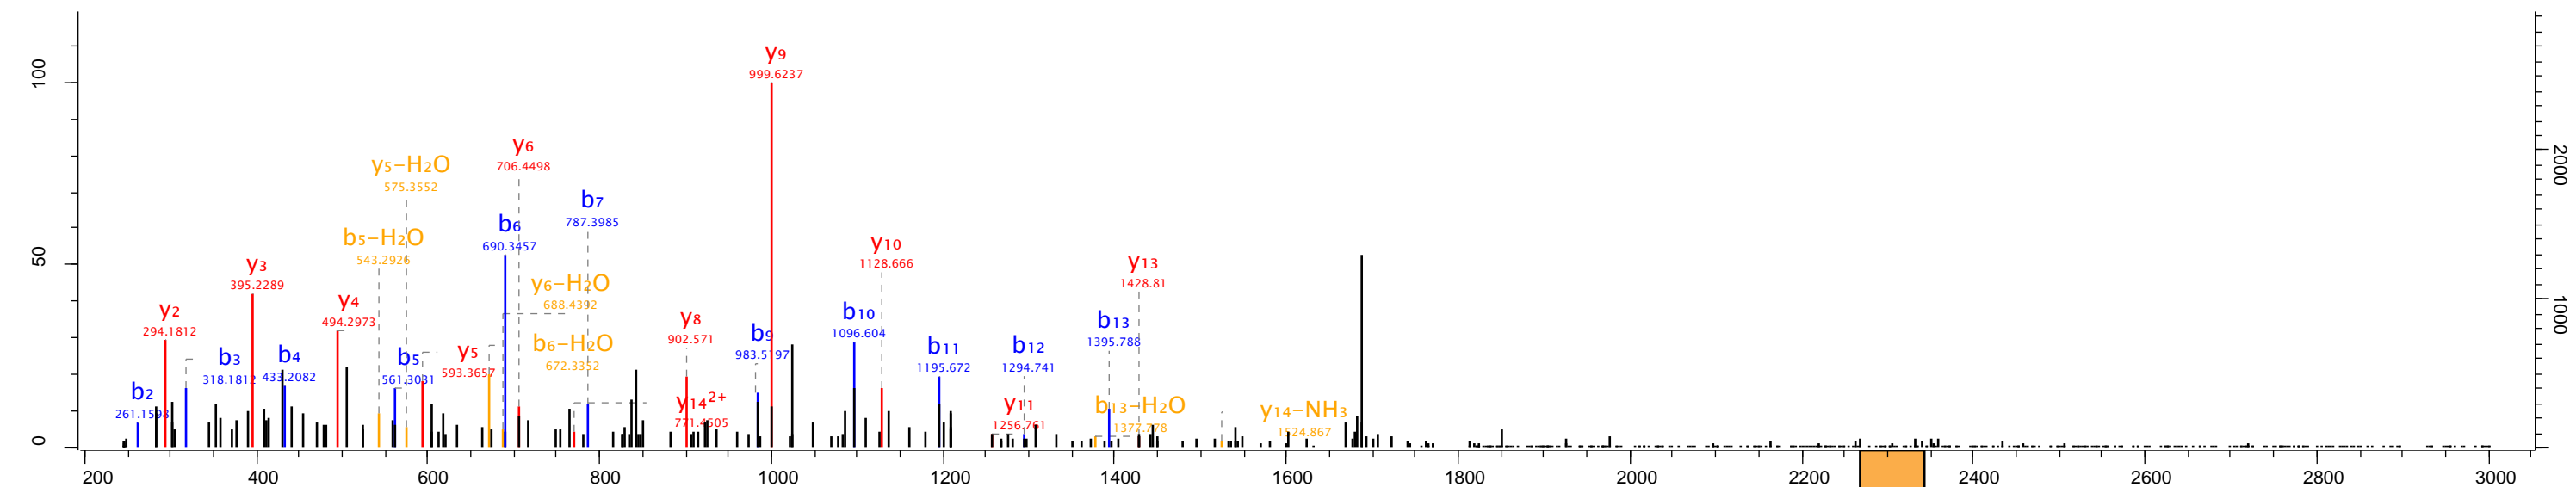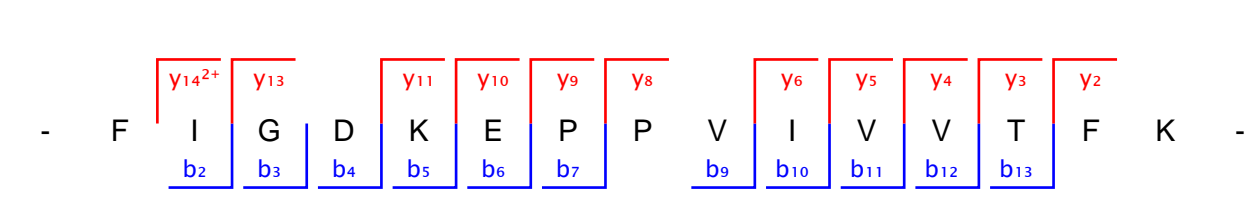

Spectral Annotation for Single-Peptide IDs in 16-cell Embryo using qQ-TOF

Raw file: 2014-10-22\_CL05\_Embx2dil\_4Hz  
 Scan: 5138 Method: TOF; CID Score: 71.69 m/z: 486.77

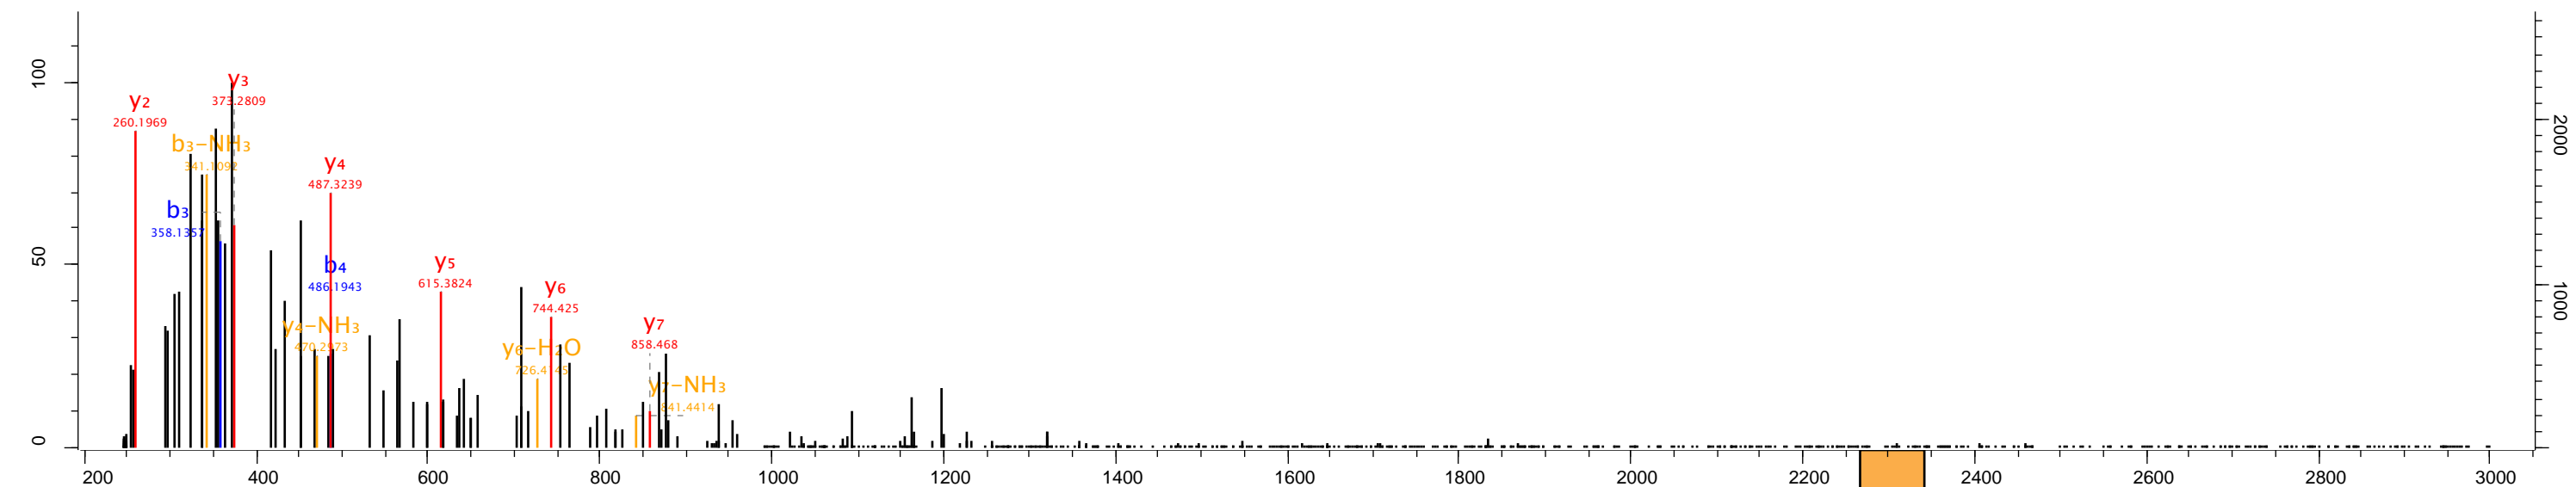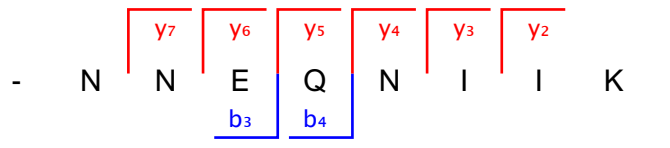

Raw file: 2014-10-22\_CL05\_Embx2dil\_4Hz  
 Scan: 5177 Method: TOF; CID Score: 41.65 m/z: 494.77

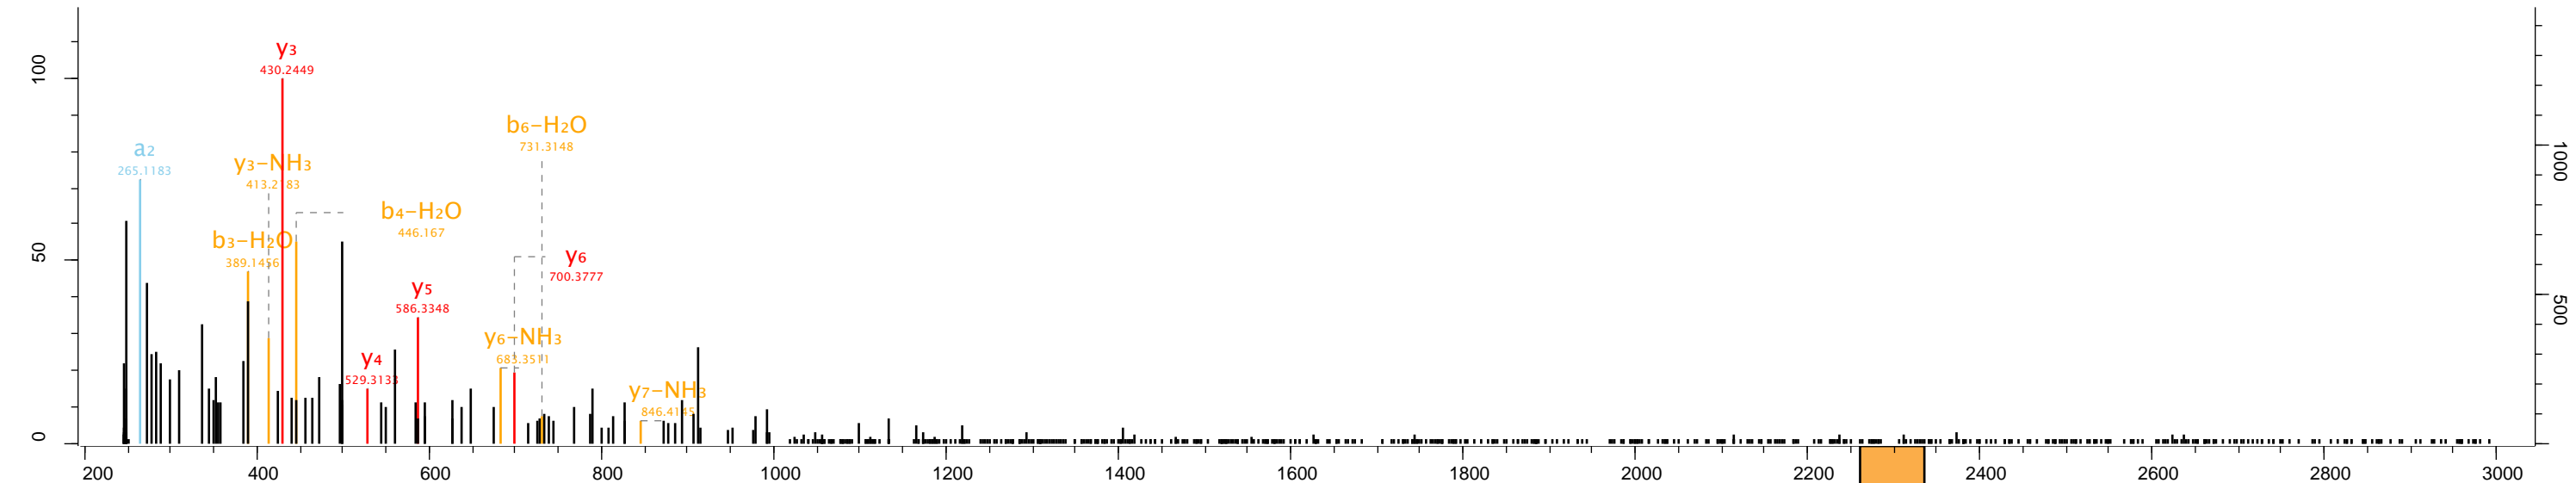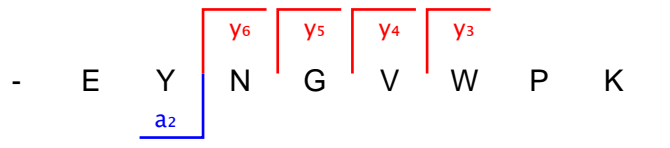



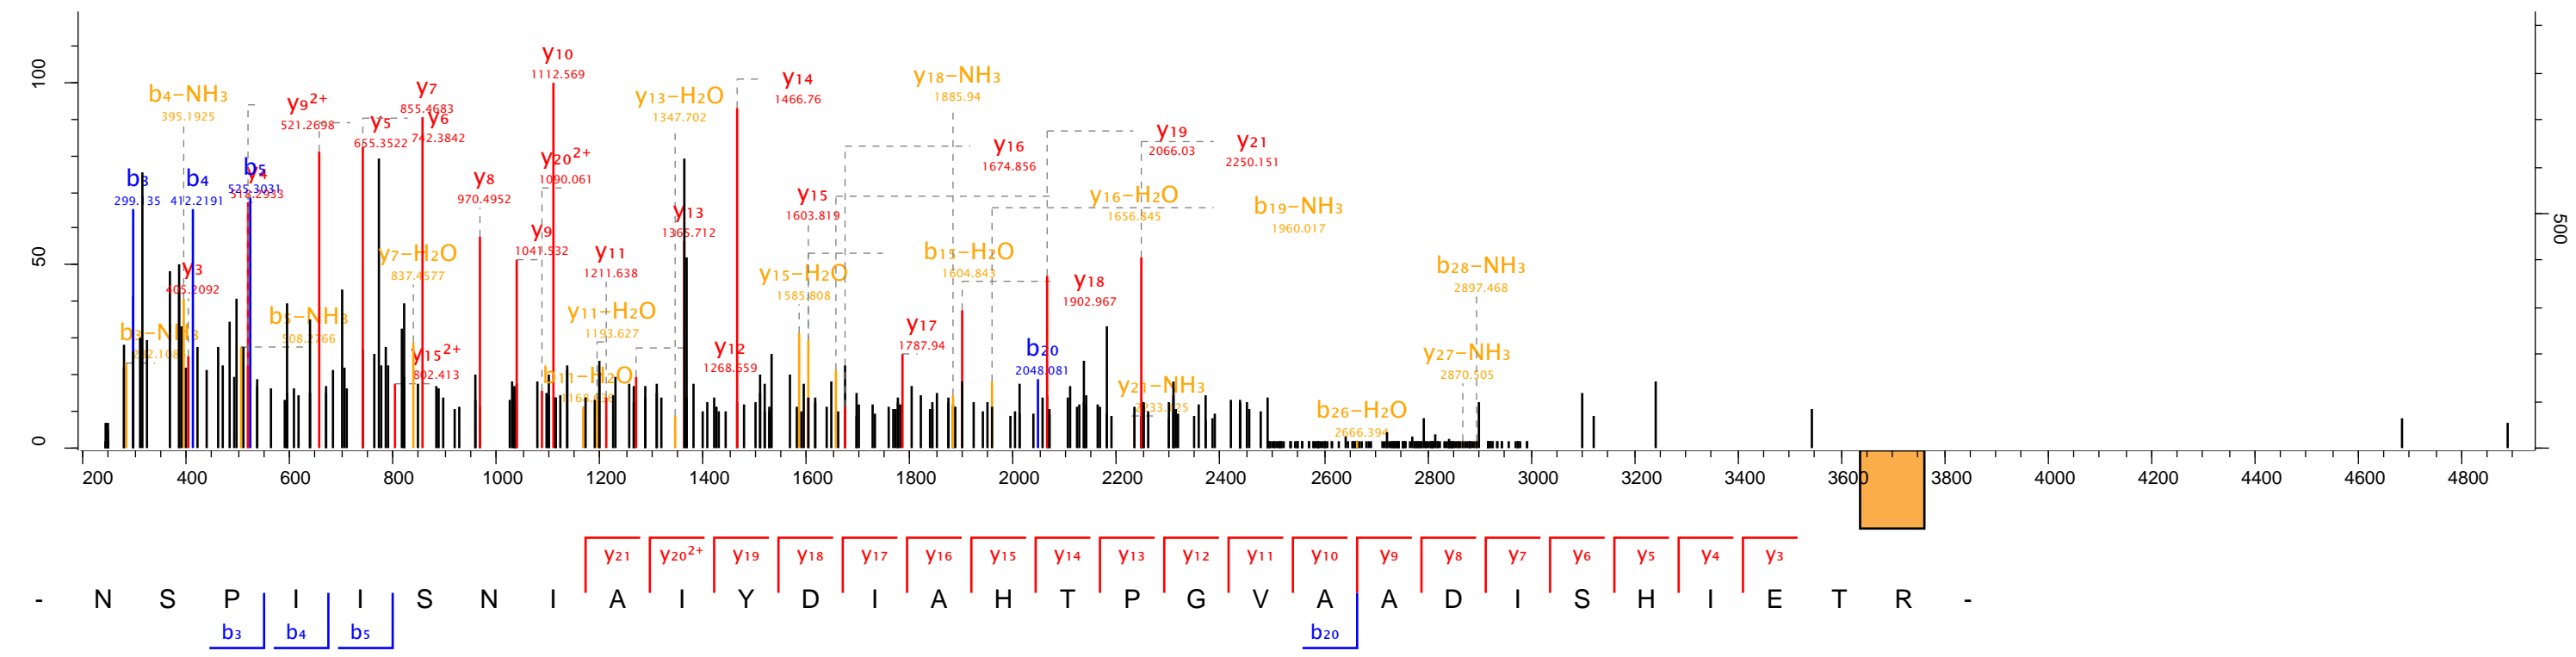

Raw file: 2014-10-22\_CL05\_Embx2dil\_4Hz  
 Scan: 5217 Method: TOF; CID Score: 21.13 m/z: 739.36

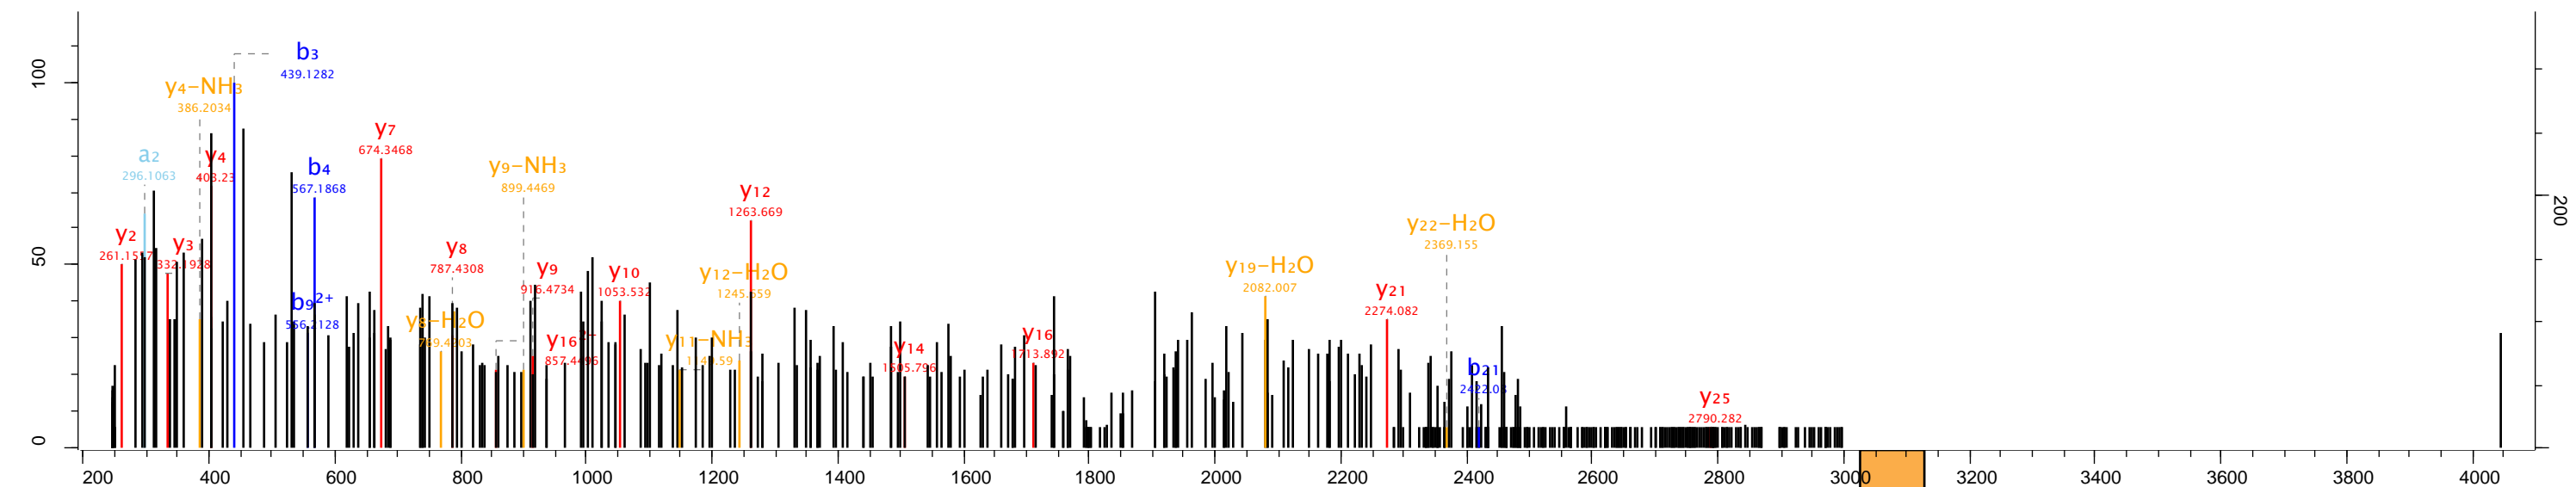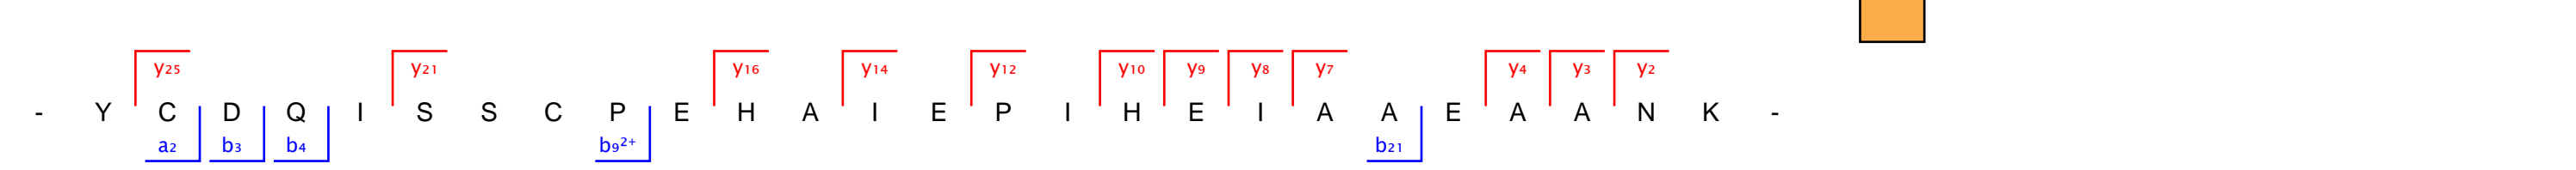

Spectral Annotation for Single-Peptide IDs in 16-cell Embryo using qQ-TOF

Raw file: 2014-10-22\_CL05\_Embx2dil\_4Hz  
 Scan: 5241 Method: TOF; CID Score: 55.44 m/z: 930.54

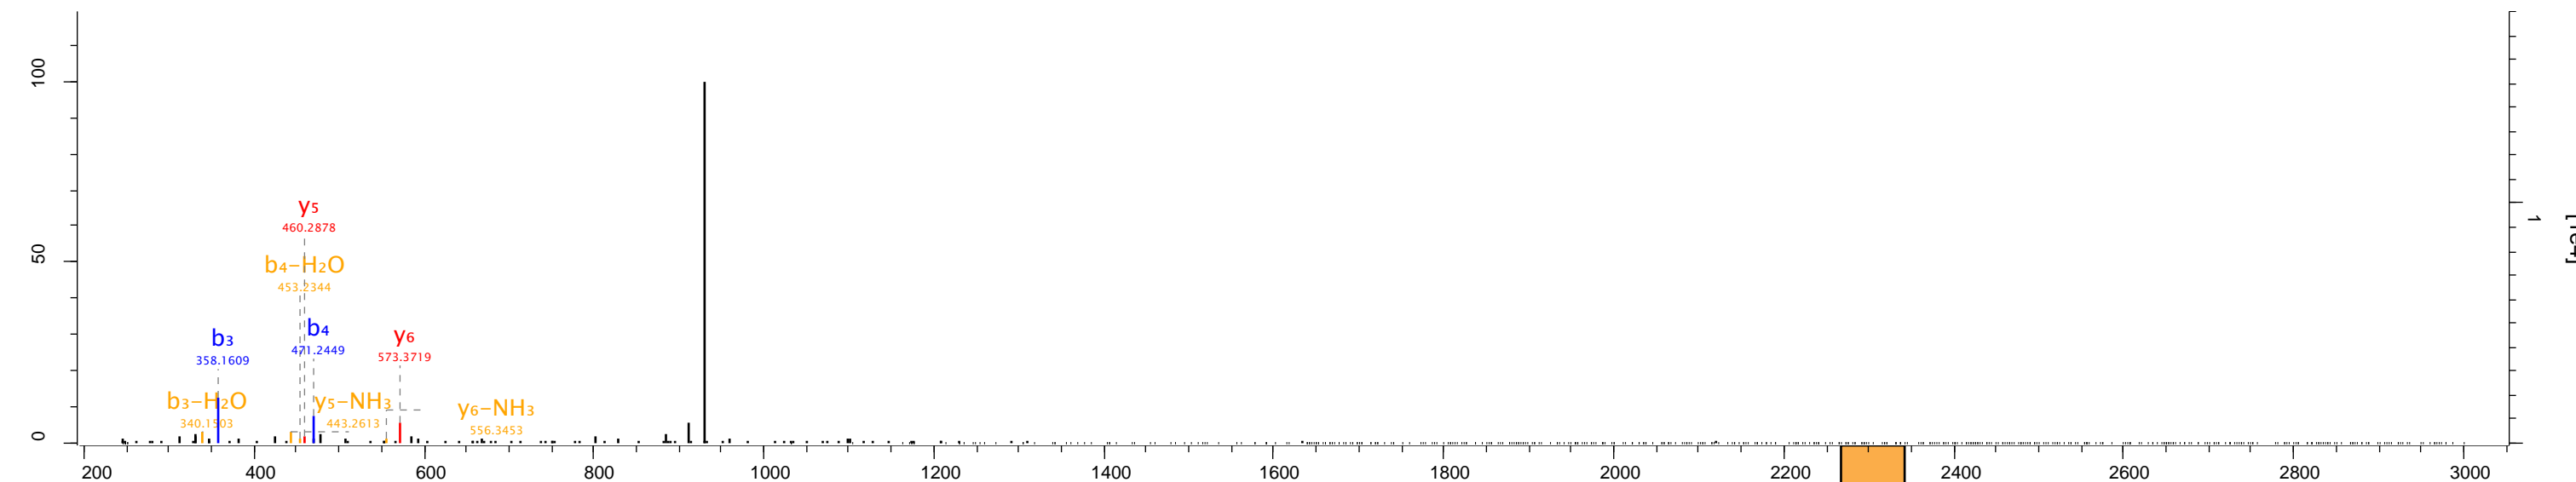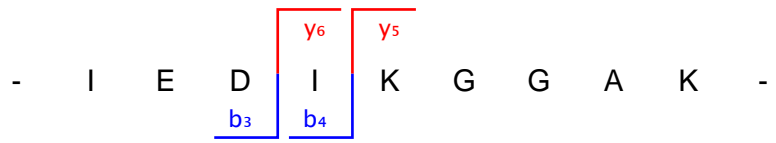

Raw file: 2014-10-22\_CL05\_Embx2dil\_4Hz  
 Scan: 5286 Method: TOF; CID Score: 78.67 m/z: 664.38

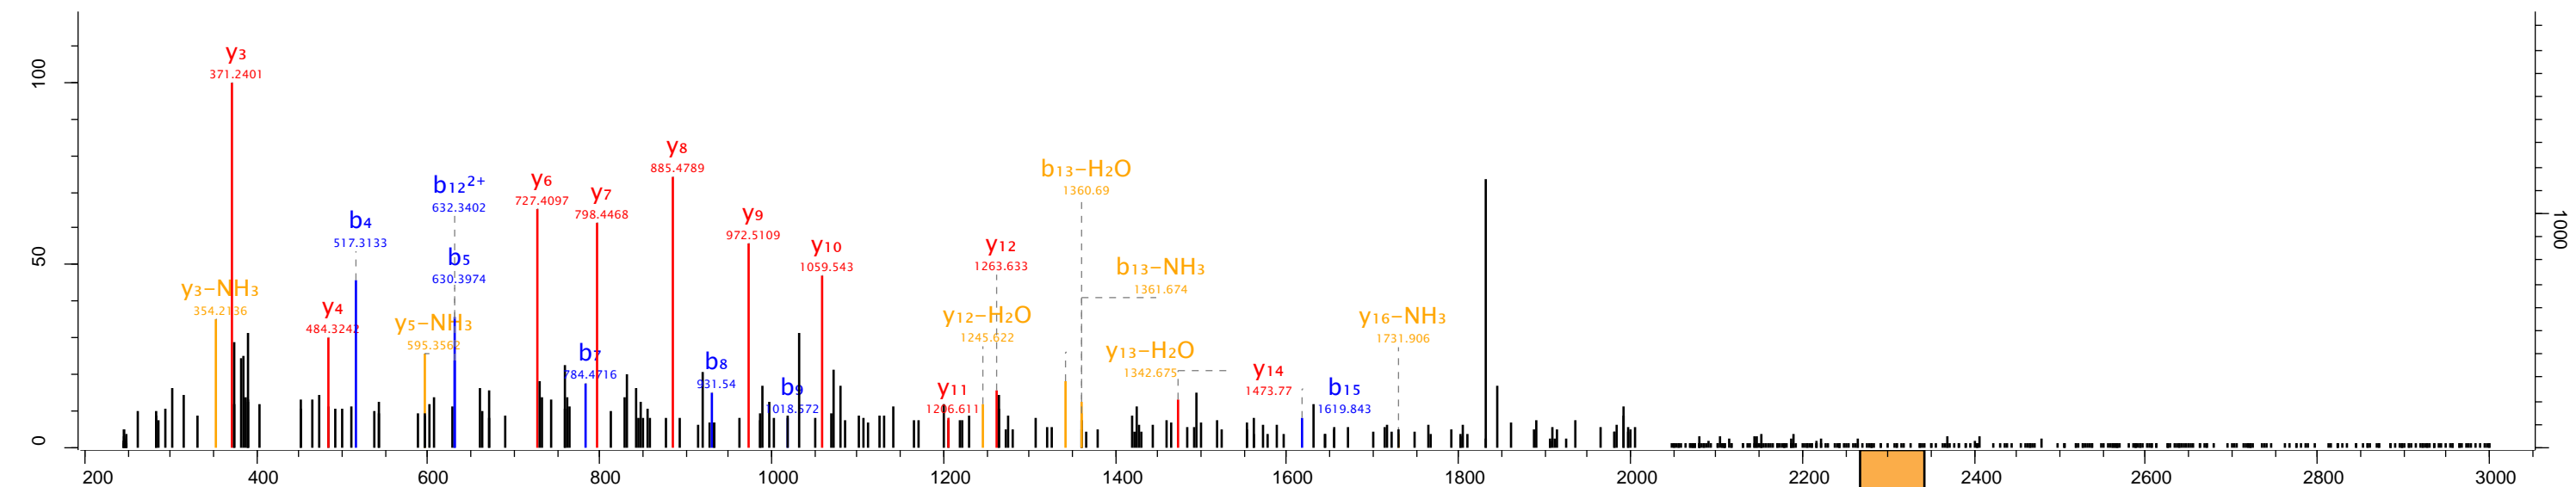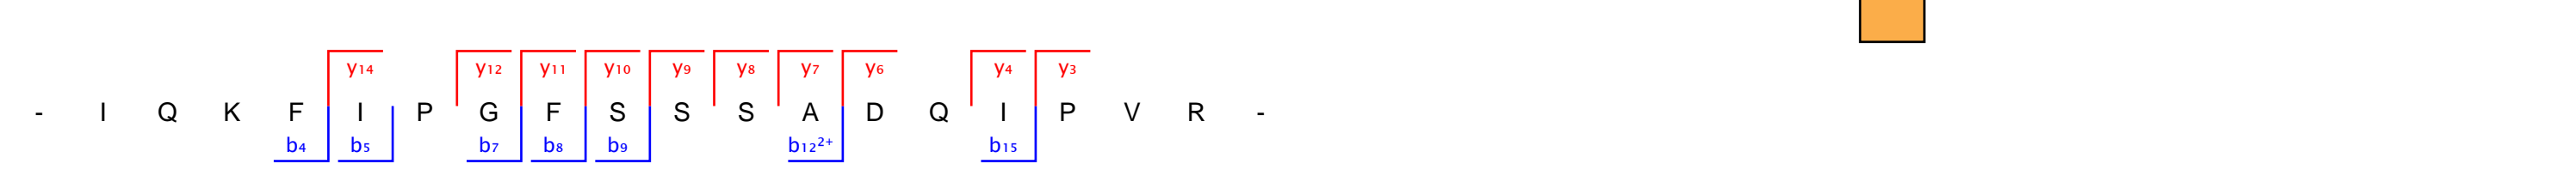

Spectral Annotation for Single-Peptide IDs in 16-cell Embryo using qQ-TOF

Raw file: 2014-10-22\_CL05\_Embx2dil\_4Hz  
 Scan: 5407  
 Method: TOF; CID  
 Score: 66.69  
 m/z: 518.79

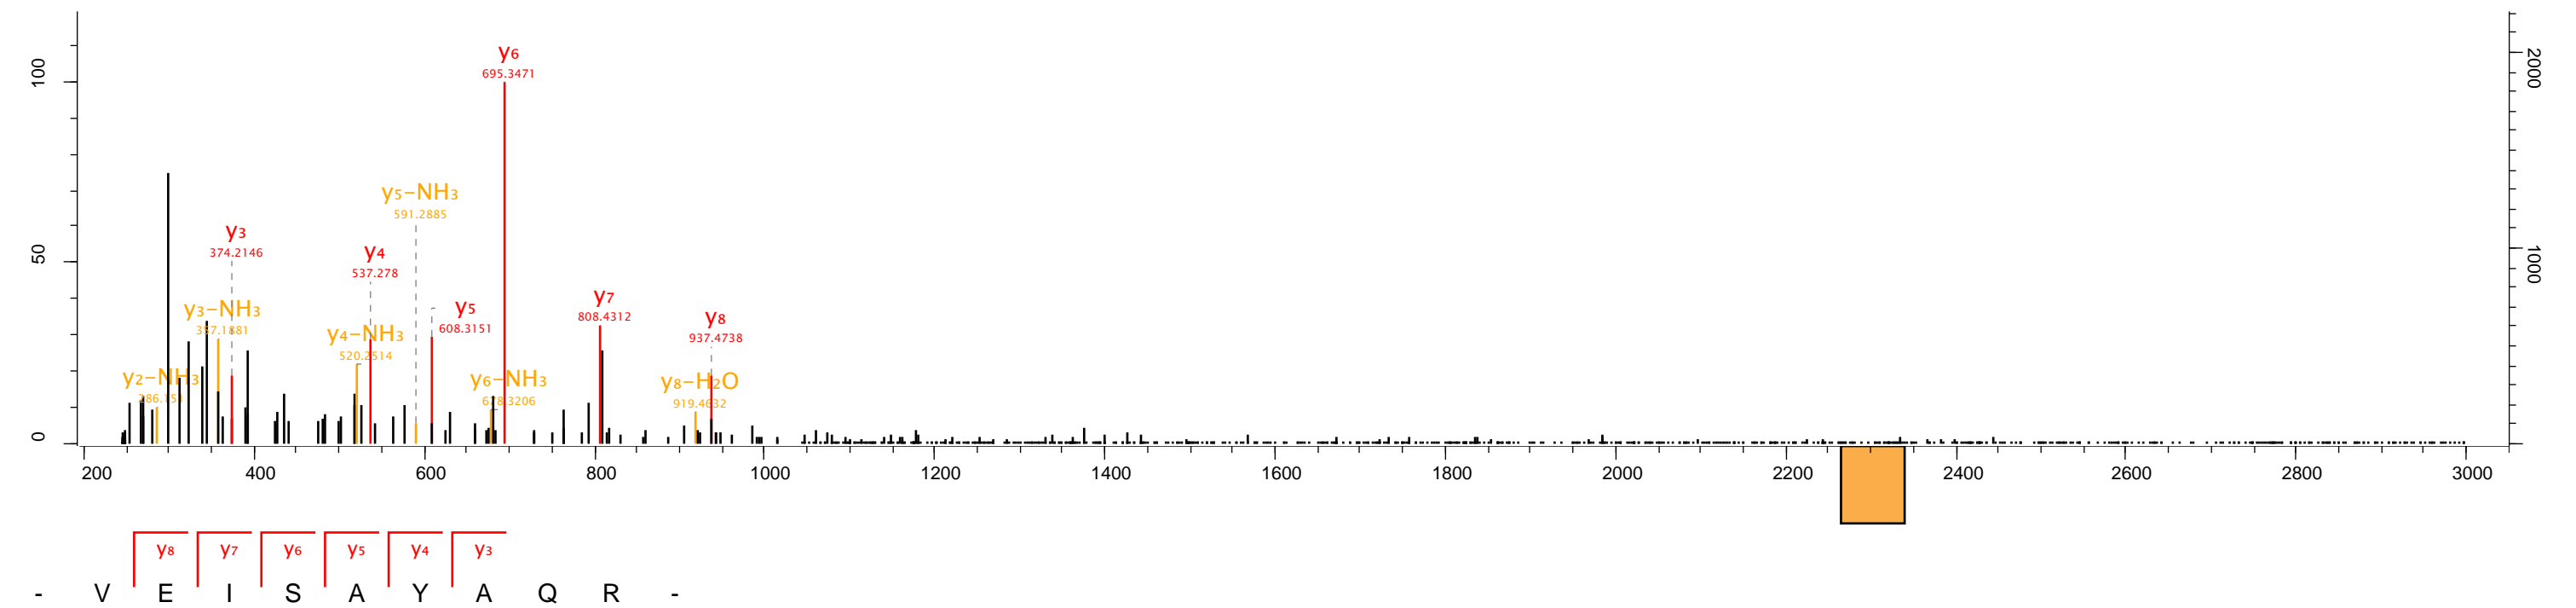

Raw file: 2014-10-22\_CL05\_Embx2dil\_4Hz  
 Scan: 5439 Method: TOF; CID Score: 188.19 m/z: 1076.51

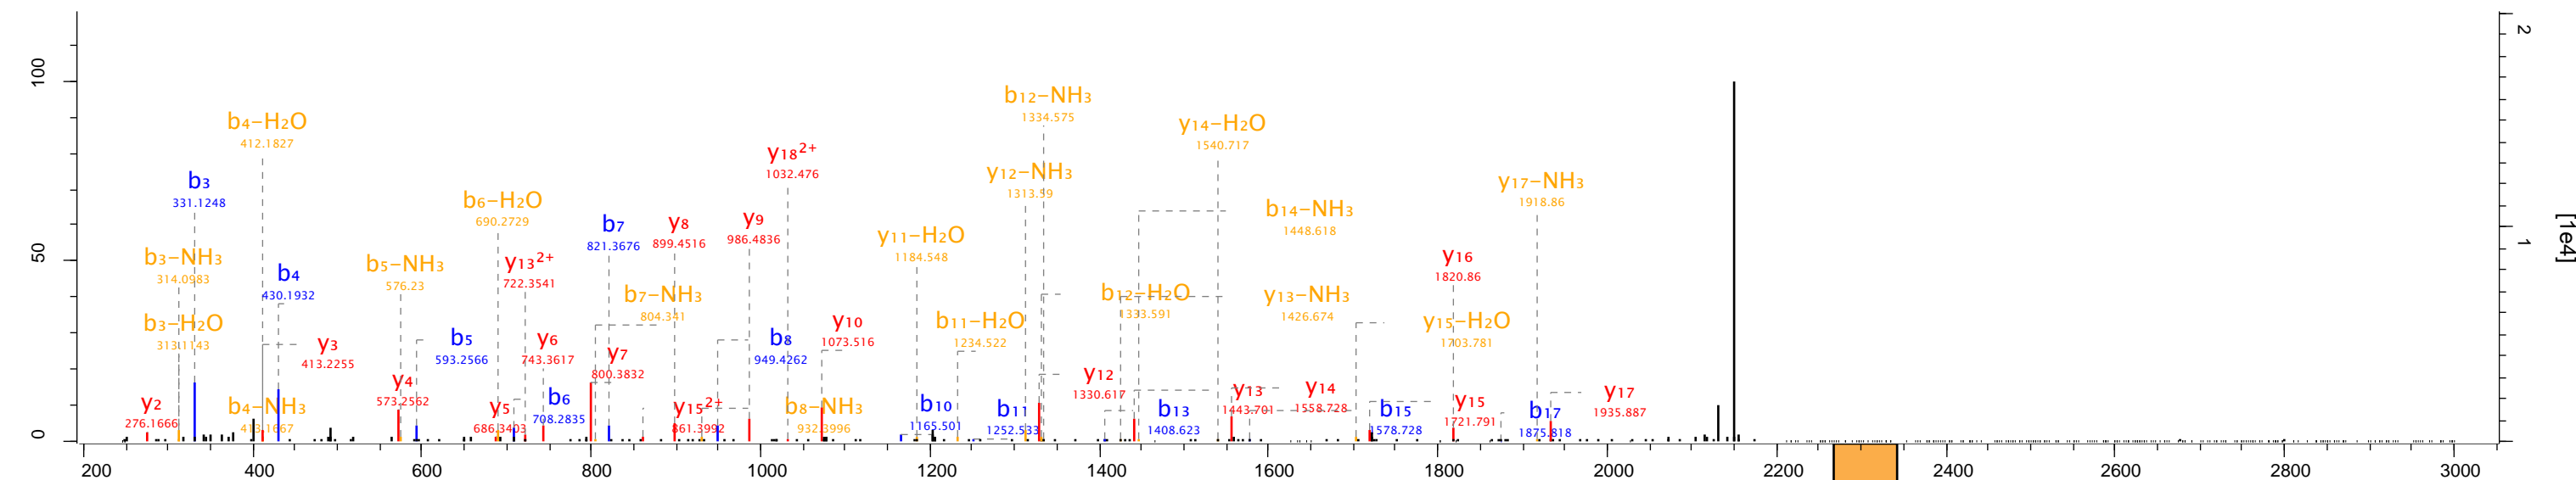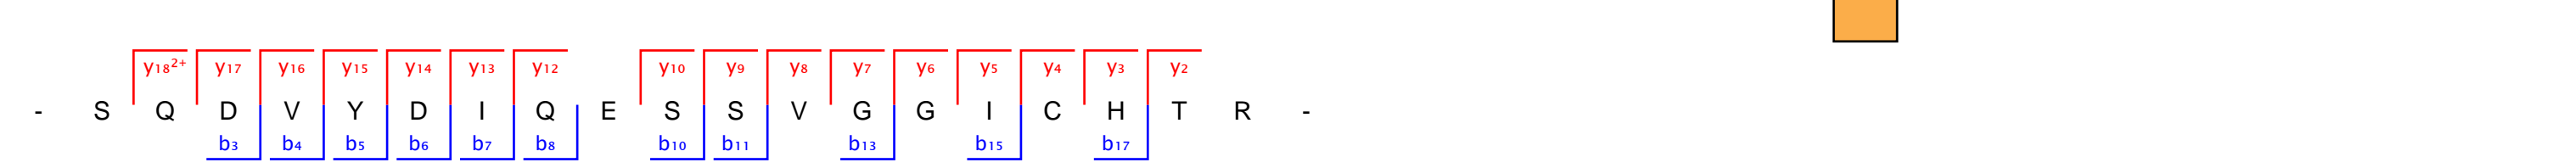

Spectral Annotation for Single-Peptide IDs in 16-cell Embryo using qQ-TOF

Raw file: 2014-10-22\_CL05\_Embx2dil\_4Hz  
 Scan: 5493 Method: TOF; CID Score: 7.66 m/z: 798.49

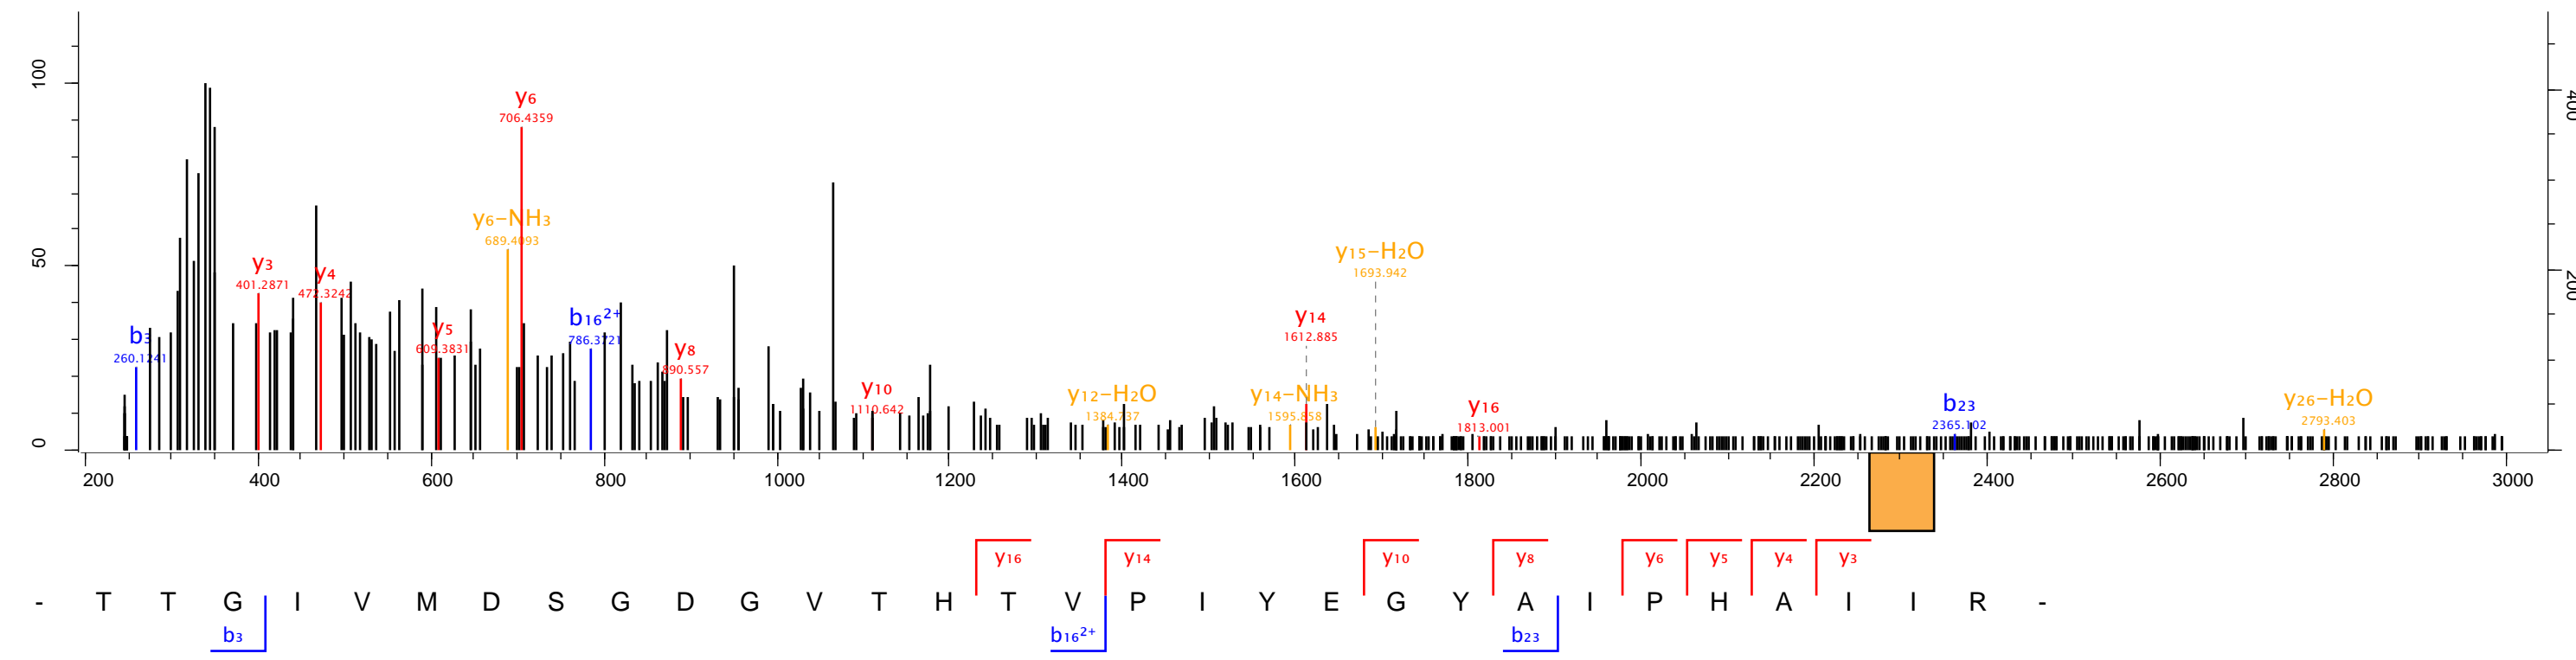

Spectral Annotation for Single-Peptide IDs in 16-cell Embryo using qQ-TOF

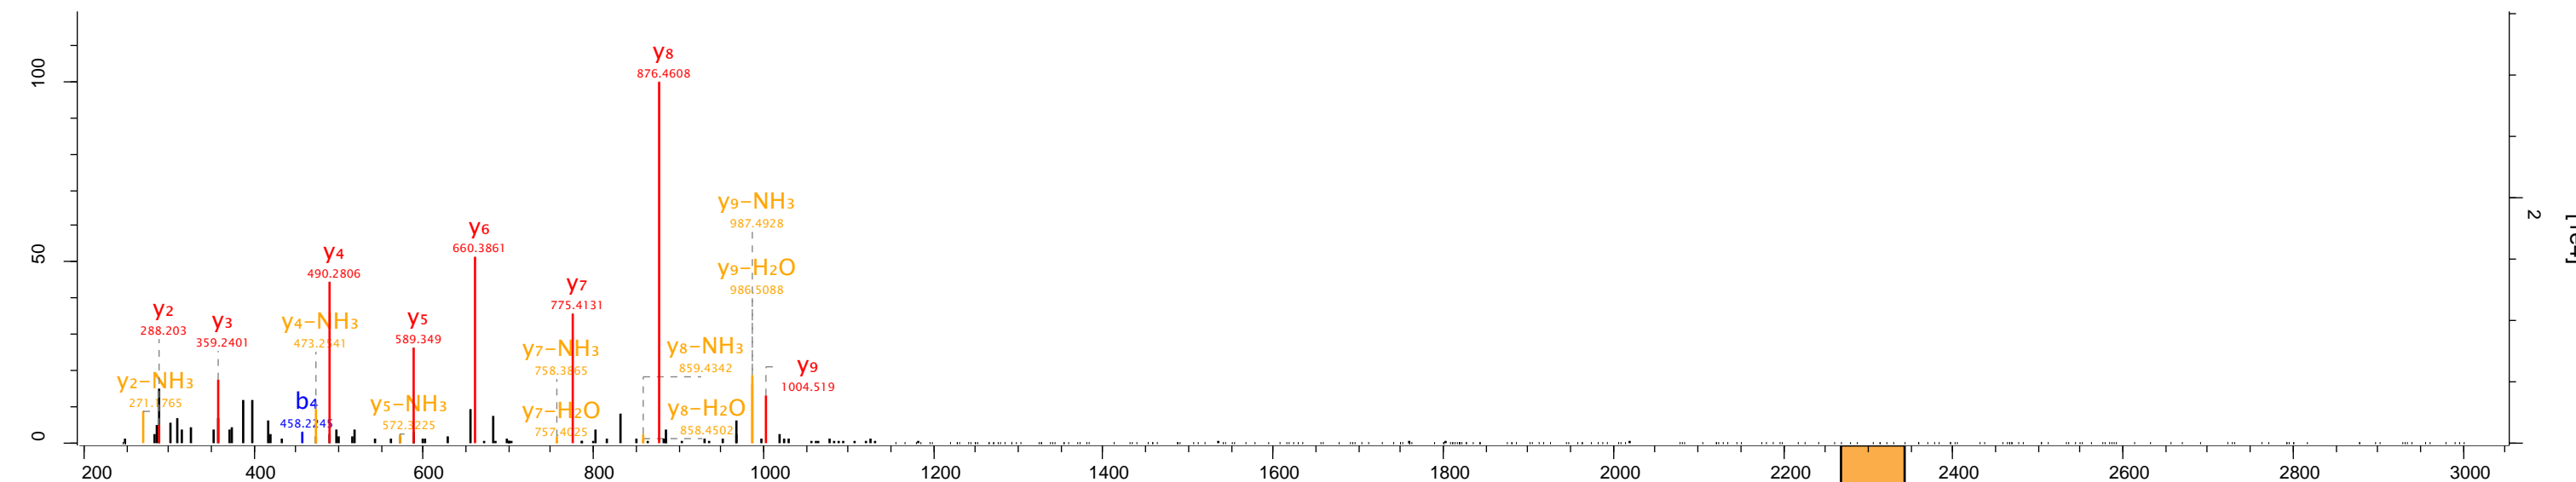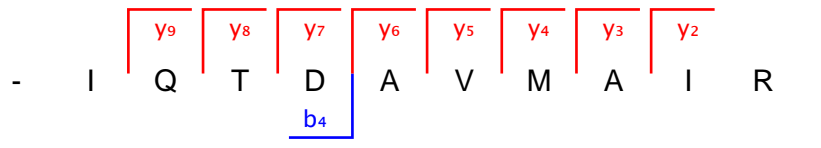



Raw file 2014-10-22\_CL05\_Embx2dil\_4Hz Scan 5644 Method TOF; CID Score 75.57 m/z 606.4

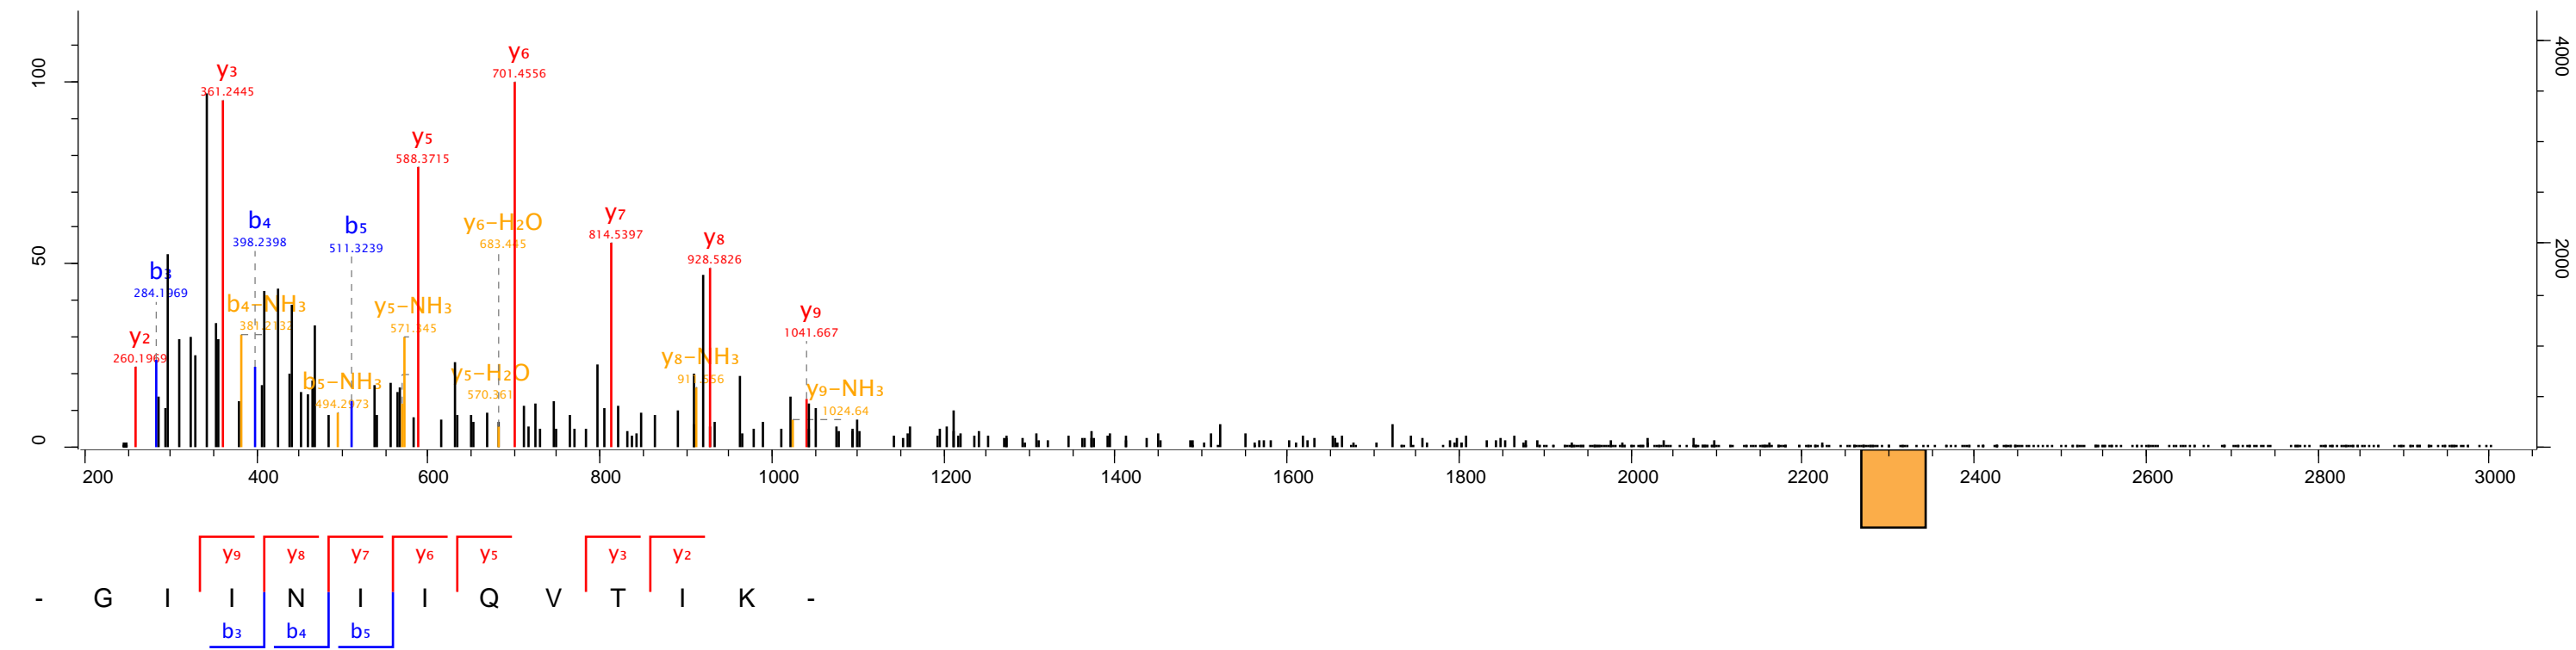

Spectral Annotation for Single-Peptide IDs in 16-cell Embryo using qQ-TOF

C. Lombard-Banek, S. Reddy, S. A. Moody, P. Nemes, Mol. Cell. Prot. 2016

Raw file 2014-10-22\_CL05\_Embx2dil\_4Hz  
 Scan 5703 Method TOF; CID Score 164.18 m/z 843.79

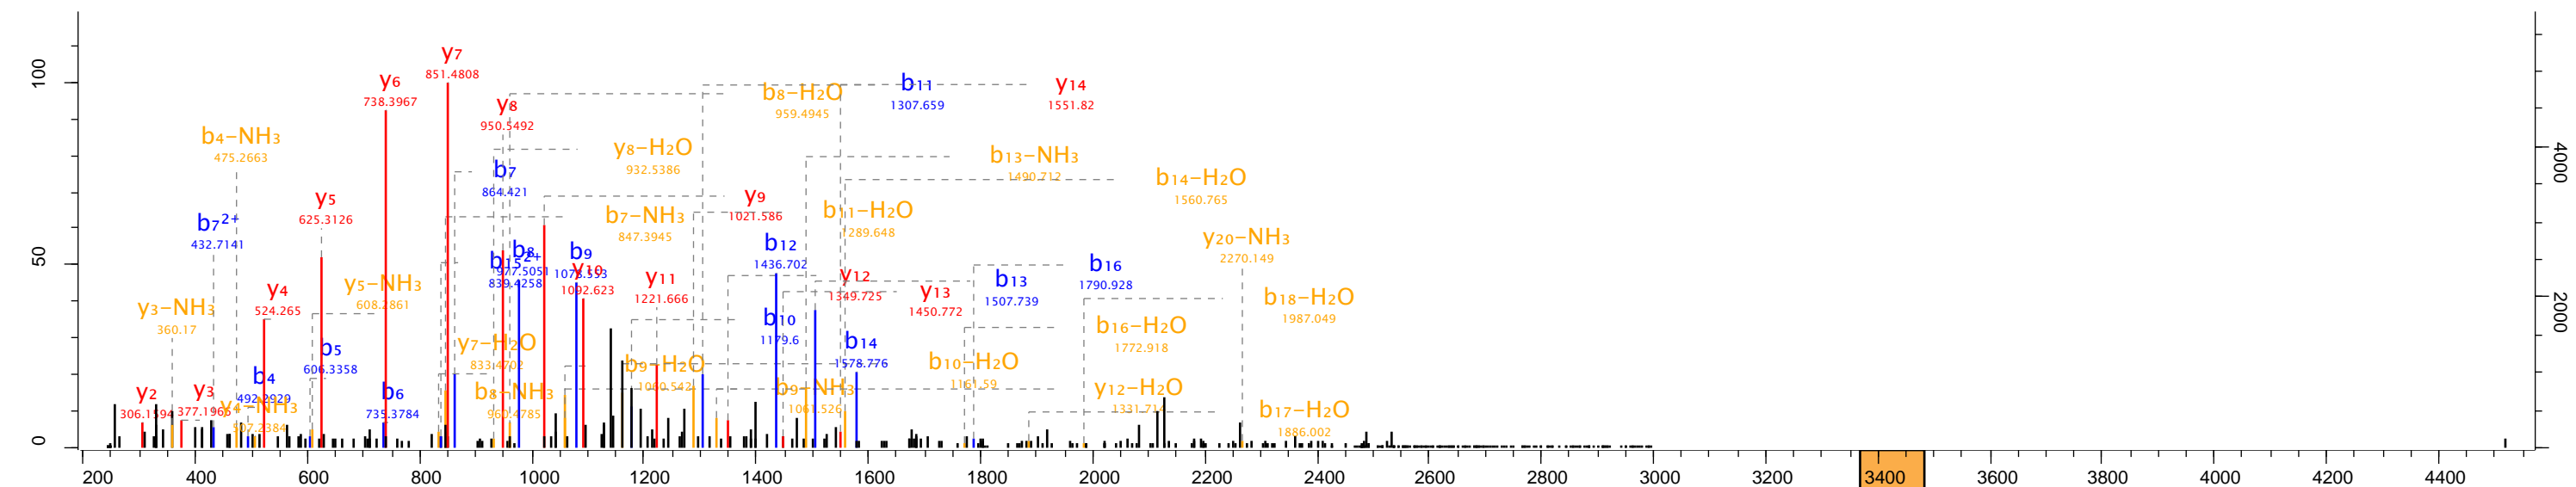

- Q I I H N E E I T T Q E A A V I I T F A M R -  
 b4 b5 b6 b7 b8 b9 b10 b11 b12 b13 b14 b15<sup>2+</sup> b16  
 y14 y13 y12 y11 y10 y9 y8 y7 y6 y5 y4 y3 y2

Spectral Annotation for Single-Peptide IDs in 16-cell Embryo using qQ-TOF

Raw file: 2014-10-22\_CL05\_Embx2dil\_4Hz  
 Scan: 5749 Method: TOF; CID Score: 98.9 m/z: 607.84

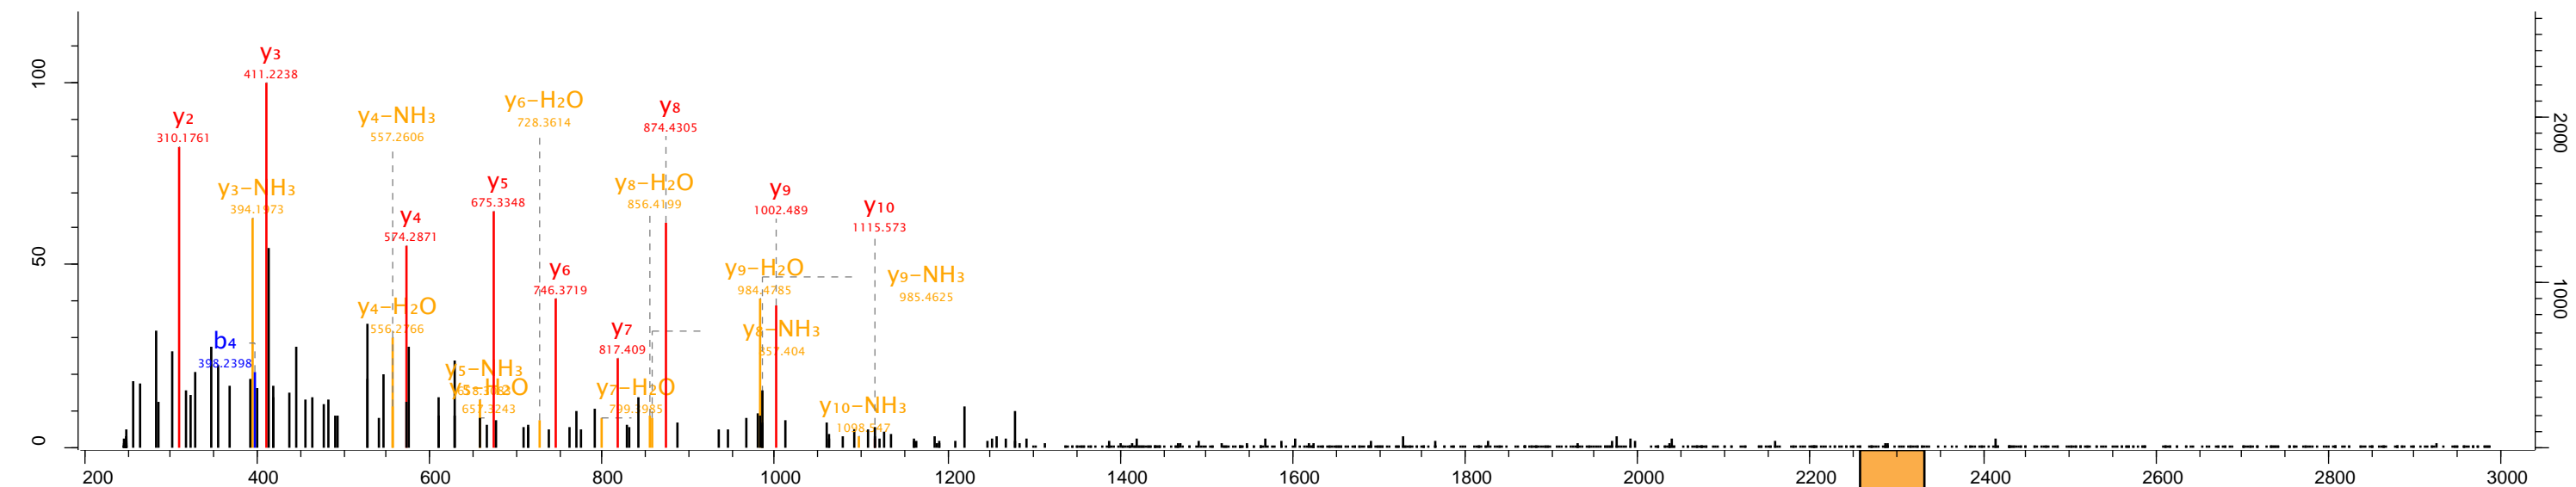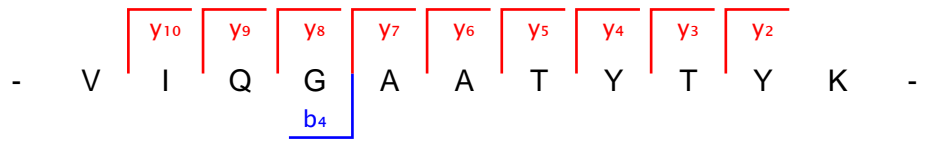

Spectral Annotation for Single-Peptide IDs in 16-cell Embryo using qQ-TOF

Raw file: 2014-10-22\_CL05\_Embx2dil\_4Hz  
 Scan: 5782 Method: TOF; CID Score: 68.85 m/z: 683.35

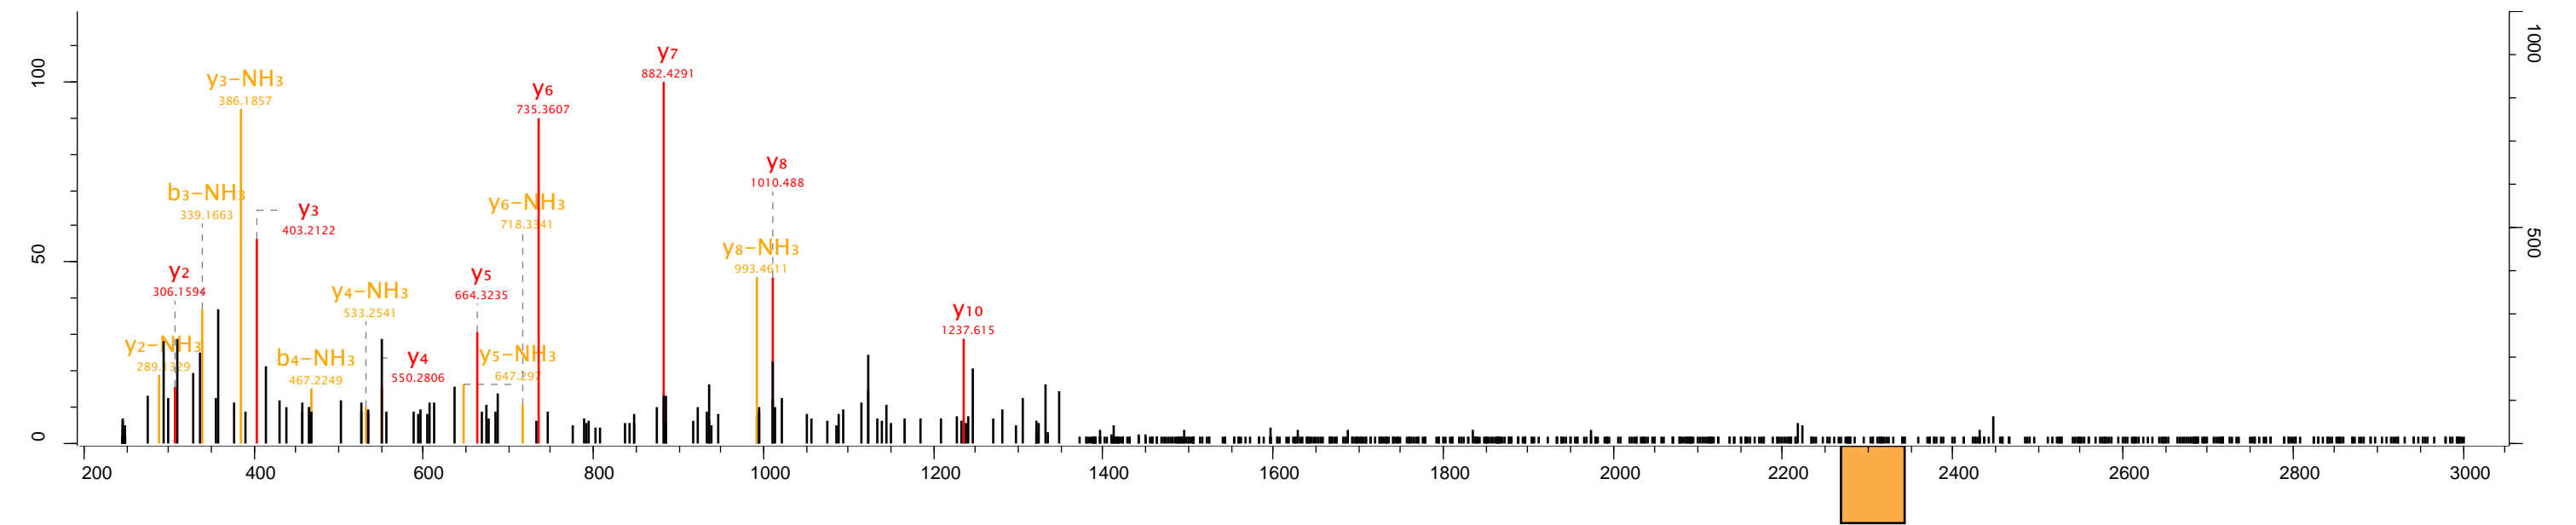

- Q N I Q F A N F P M R -  
 Above the sequence, red brackets indicate the fragmentation sites for the labeled peaks: y10 (between N and I), y8 (between I and Q), y7 (between Q and F), y6 (between F and A), y5 (between A and N), y4 (between N and F), y3 (between F and P), and y2 (between P and M).

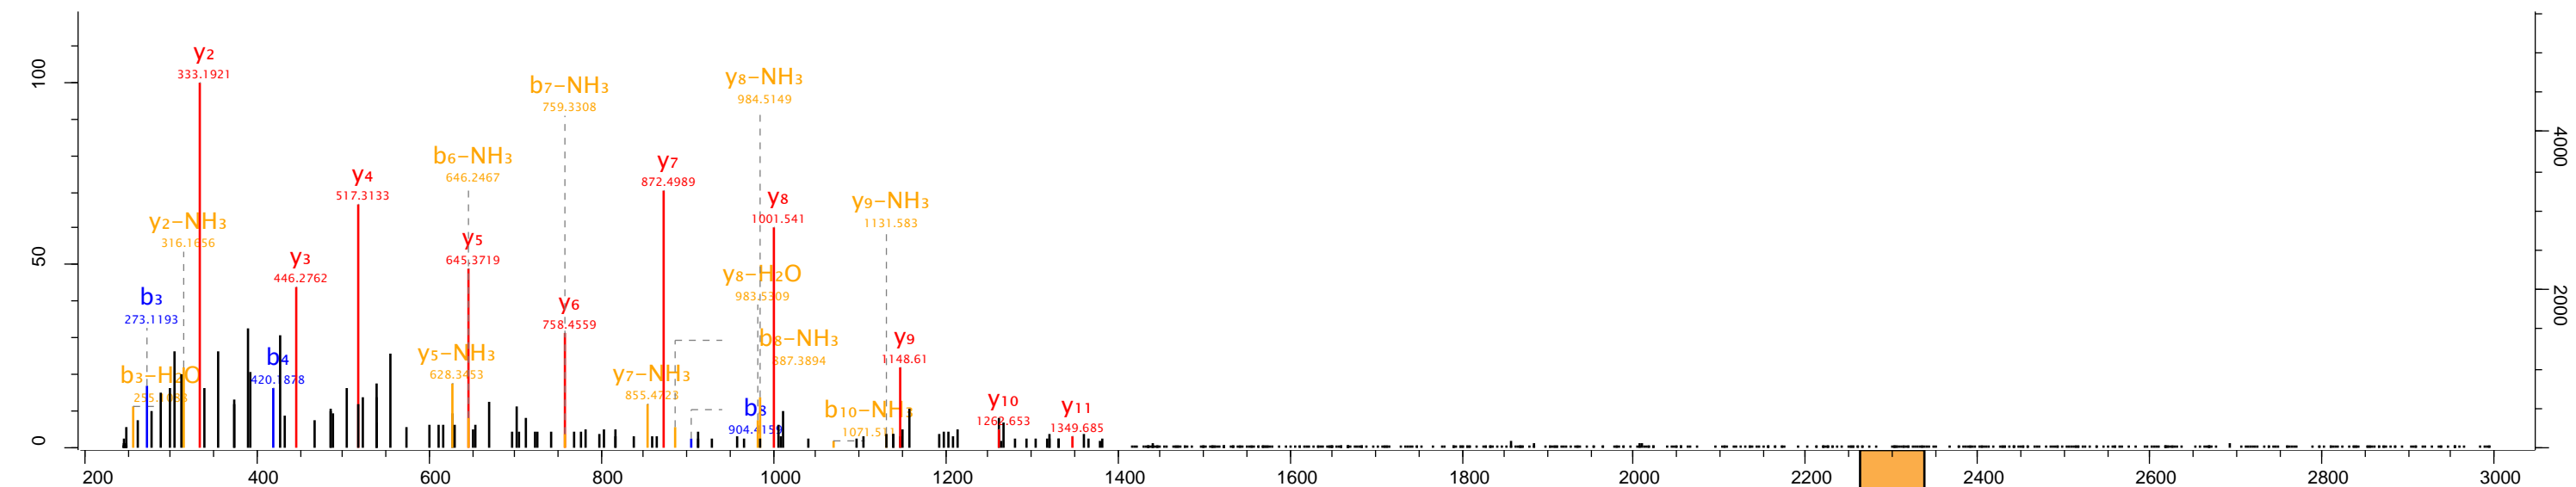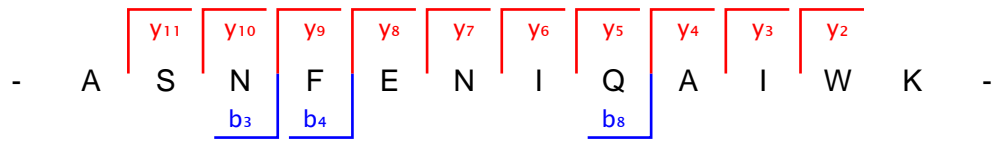

Raw file: 2014-10-22\_CL05\_Embx2dil\_4Hz  
 Scan: 5897 Method: TOF; CID Score: 86.11 m/z: 655.39

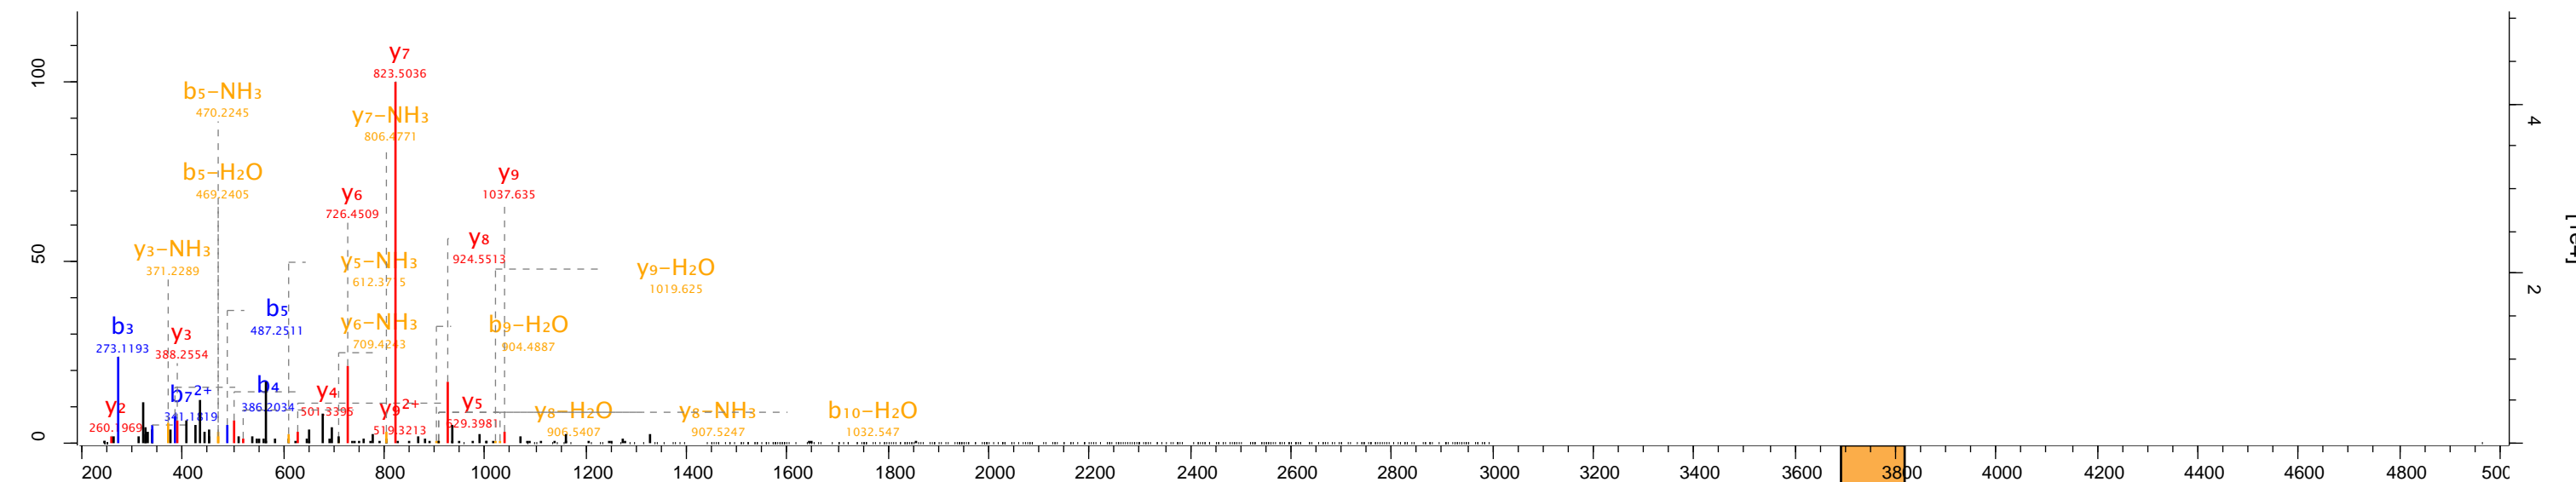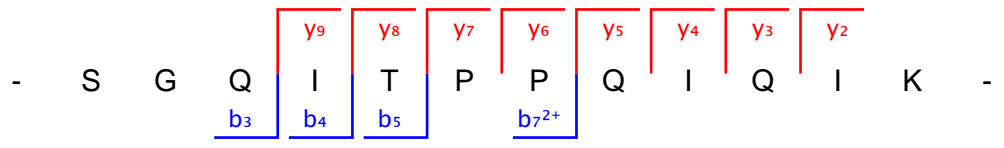

Spectral Annotation for Single-Peptide IDs in 16-cell Embryo using qQ-TOF

Raw file: 2014-10-22\_CL05\_Embx2dil\_4Hz  
 Scan: 5901 Method: TOF; CID Score: 88.98 m/z: 831.42

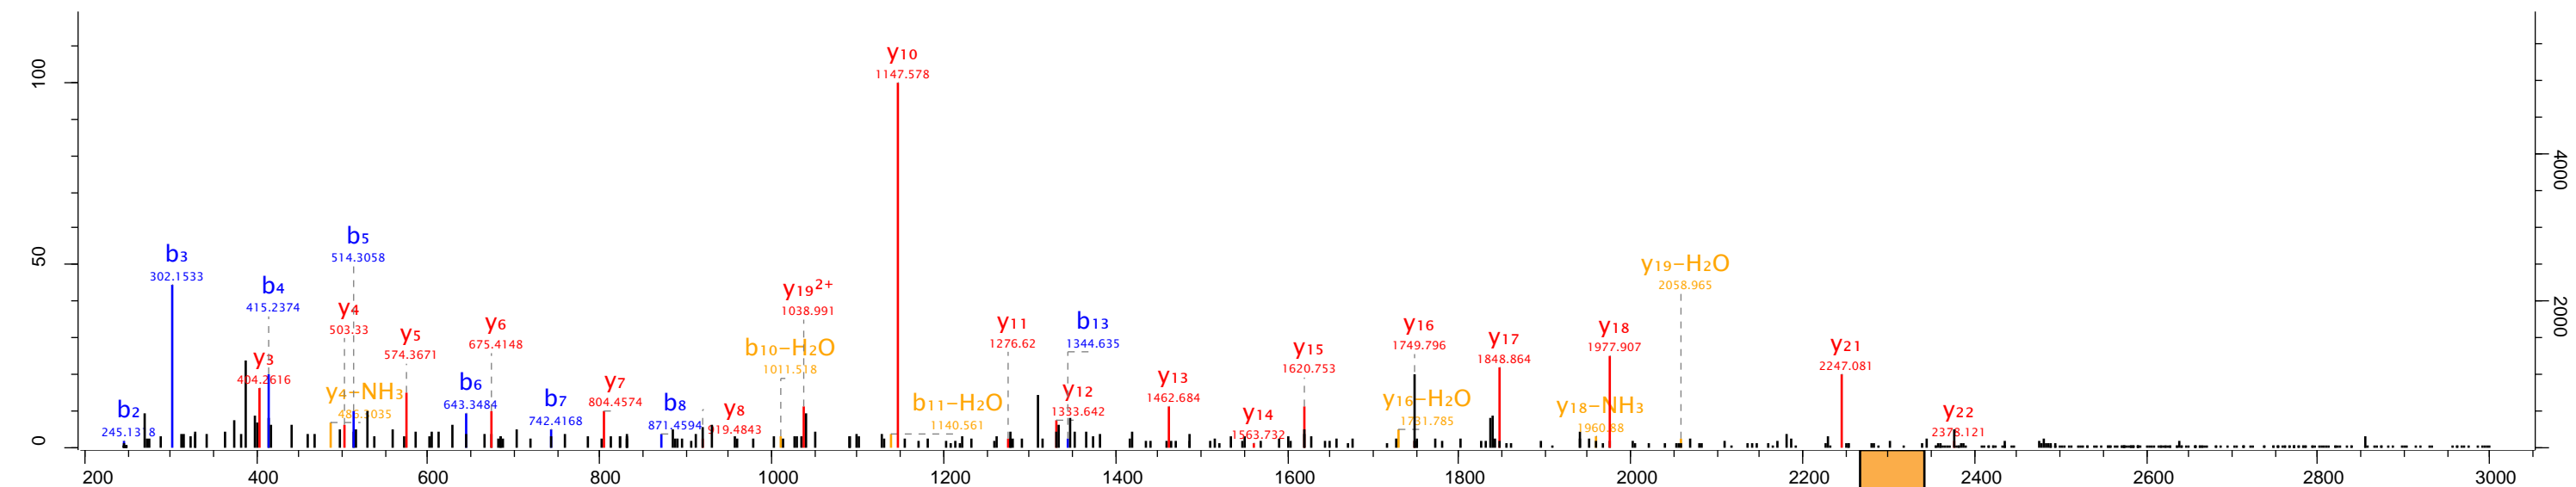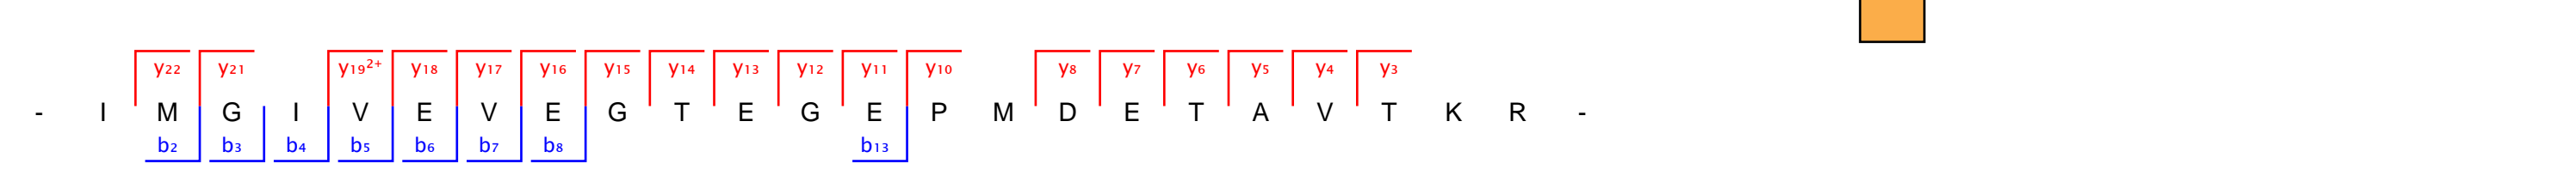

Spectral Annotation for Single-Peptide IDs in 16-cell Embryo using qQ-TOF

Raw file: 2014-10-22\_CL05\_Embx2dil\_4Hz  
 Scan: 6091 Method: TOF; CID Score: 117.93 m/z: 732.88

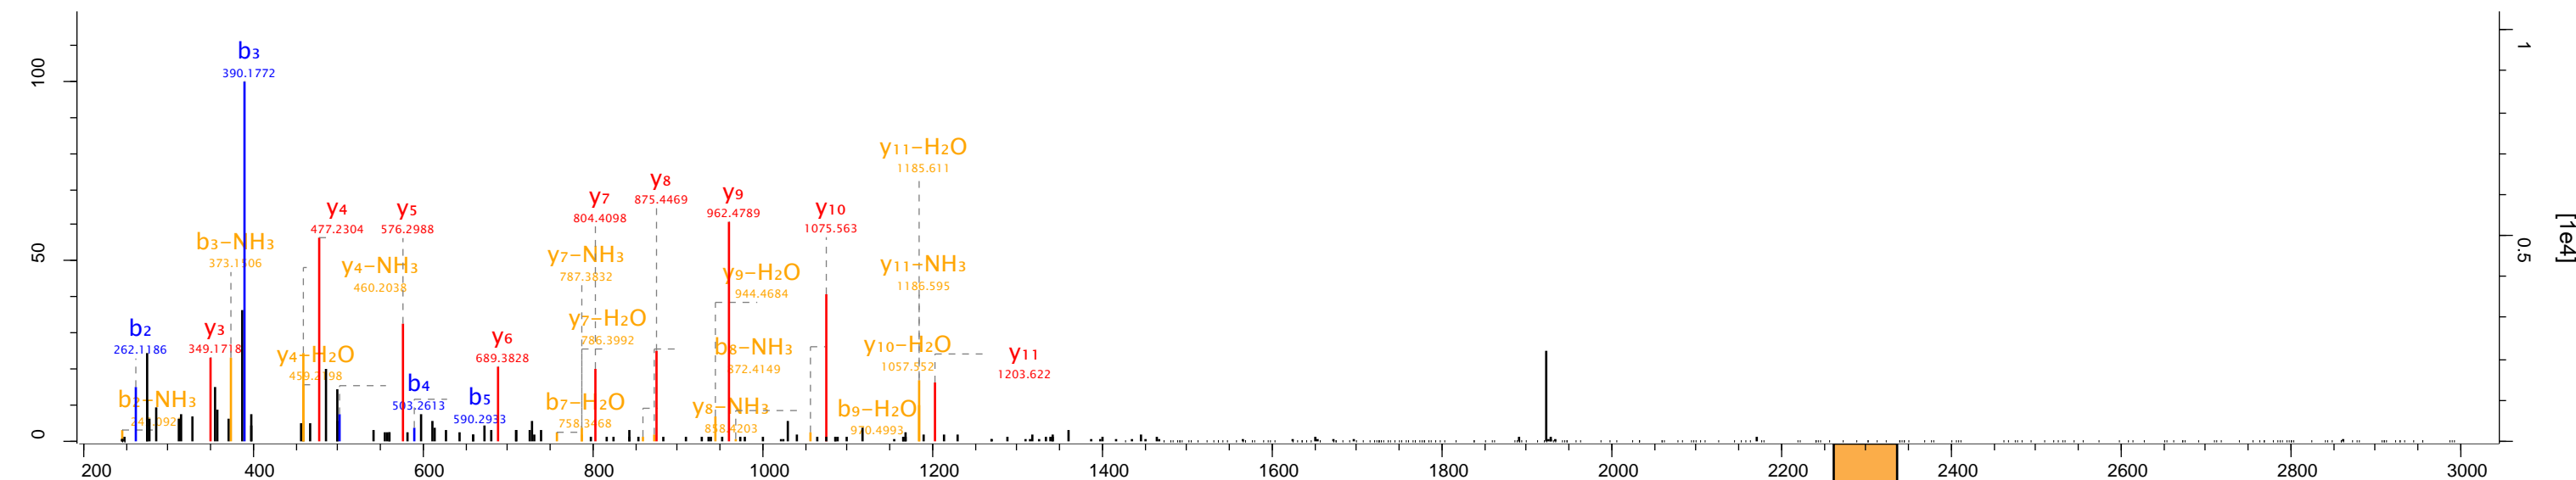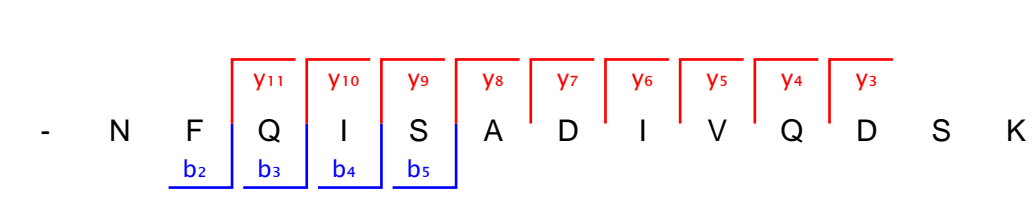

Spectral Annotation for Single-Peptide IDs in 16-cell Embryo using qQ-TOF



Raw file: 2014-10-22\_CL05\_Embx2dil\_4Hz  
 Scan: 6094 Method: TOF; CID Score: 85.55 m/z: 660.35

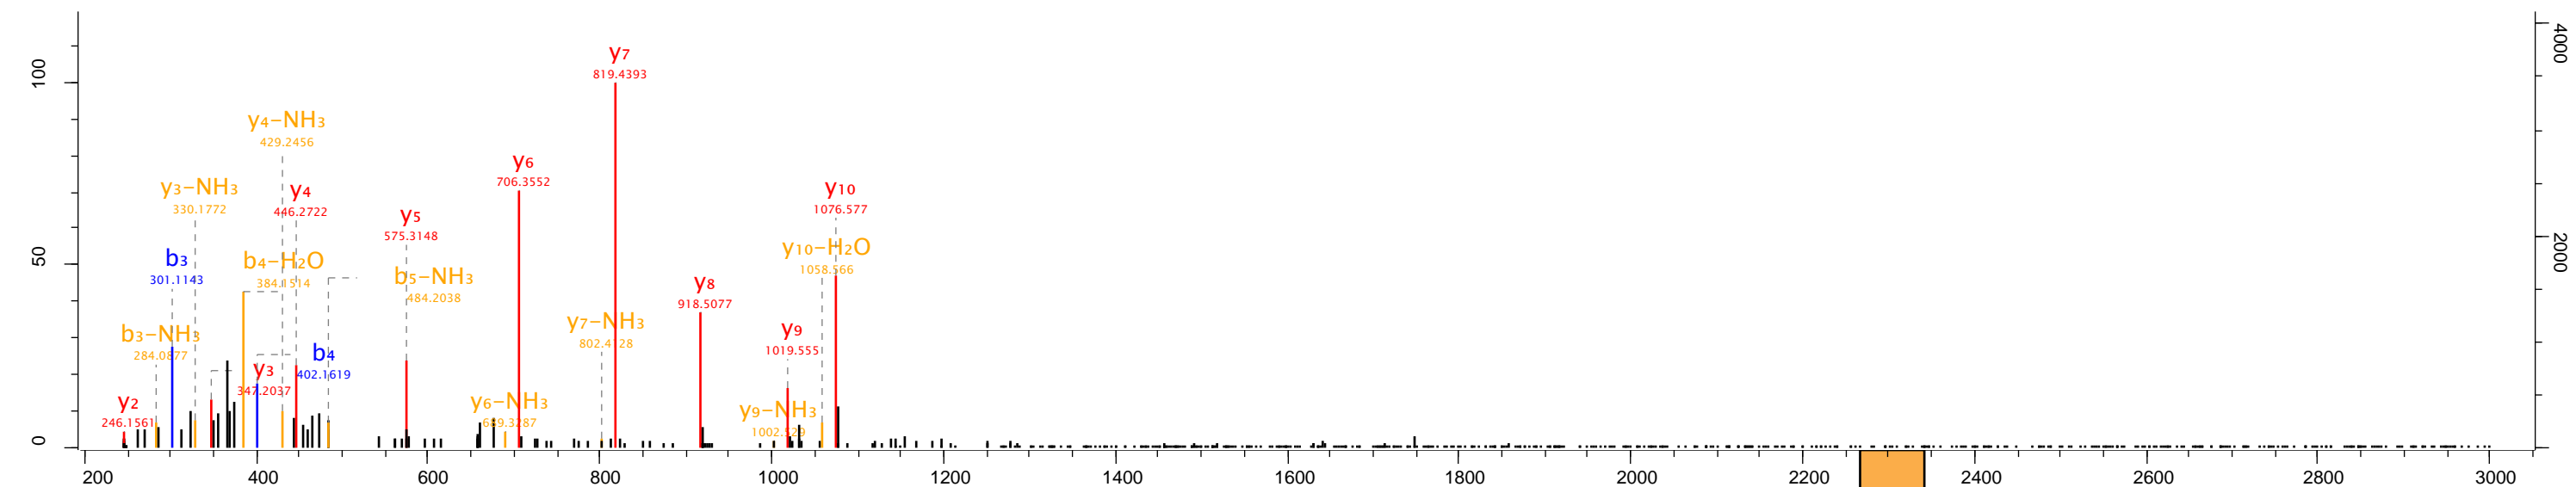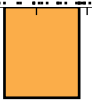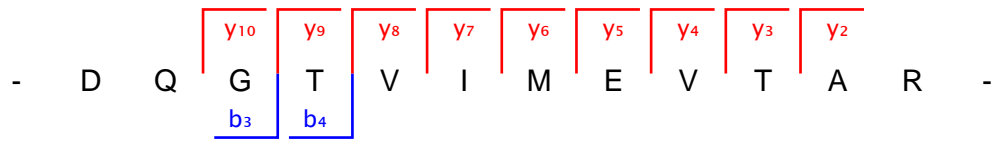

Raw file: 2014-10-22\_CL05\_Embx2dil\_4Hz  
 Scan: 6137 Method: TOF; CID Score: 32.7 m/z: 692.41

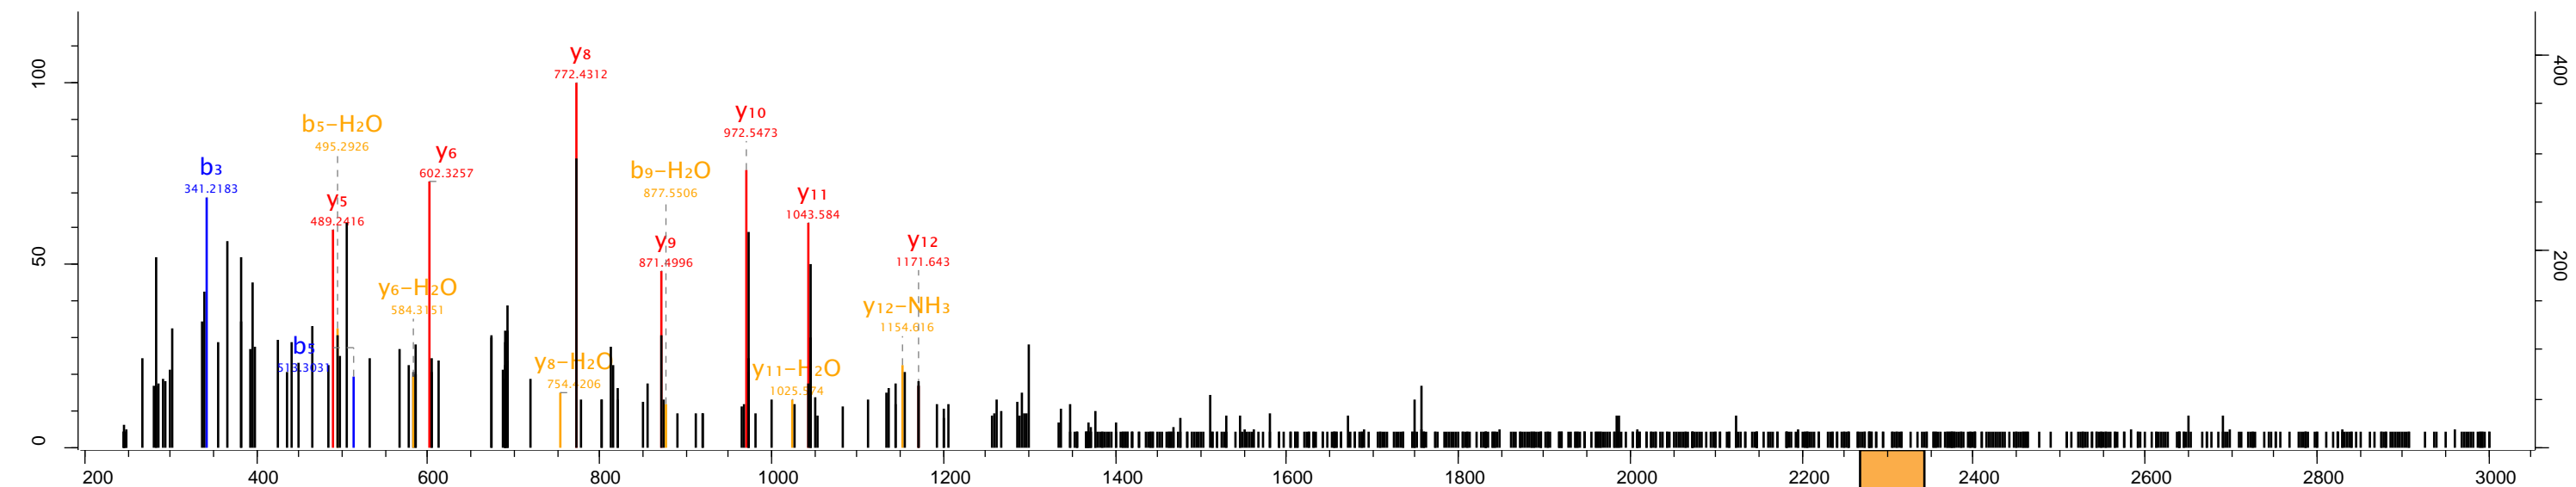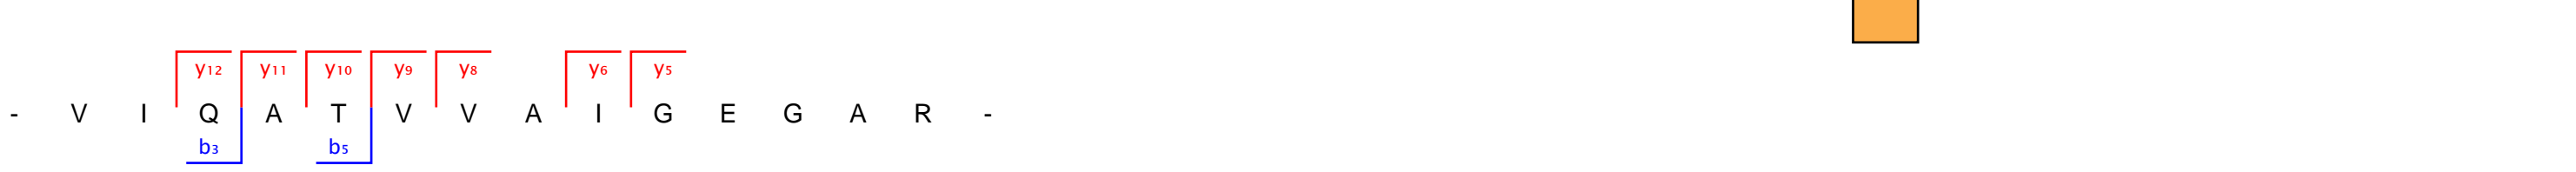

Raw file: 2014-10-22\_CL05\_Embx2dil\_4Hz  
 Scan: 6234 Method: TOF; CID Score: 55.75 m/z: 846.49

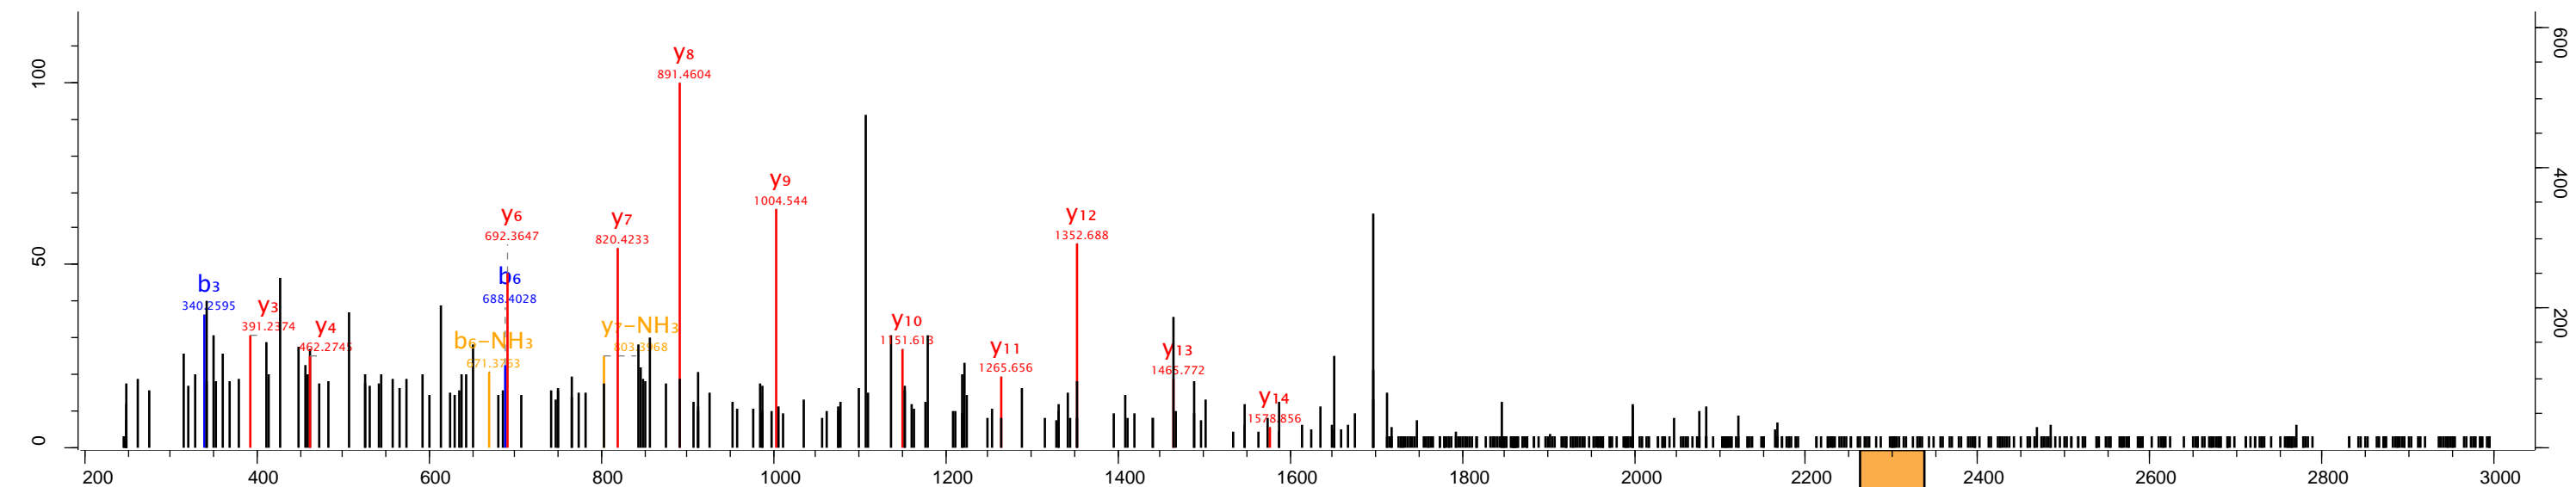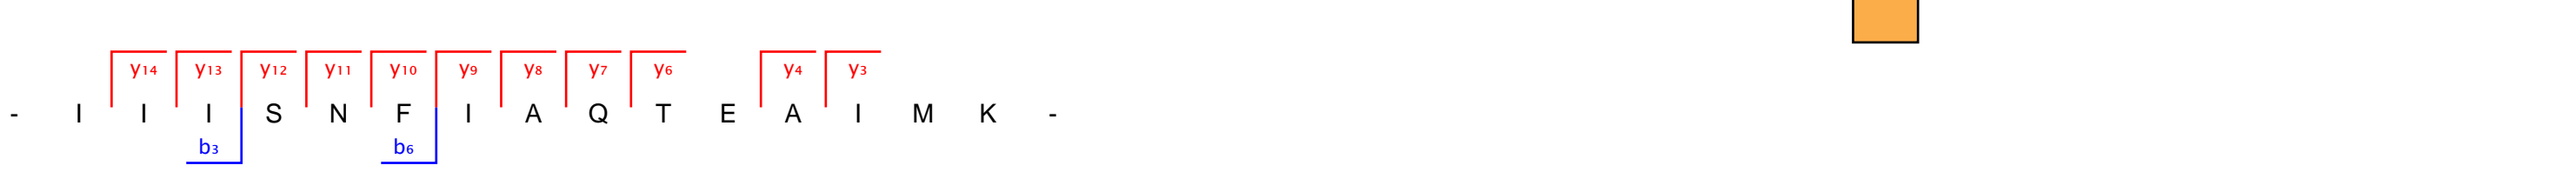

Spectral Annotation for Single-Peptide IDs in 16-cell Embryo using qQ-TOF

Raw file Scan Method Score m/z  
 2014-10-22\_CL05\_Embx2dil\_4Hz 6256 TOF; CID 66.92 1008.83

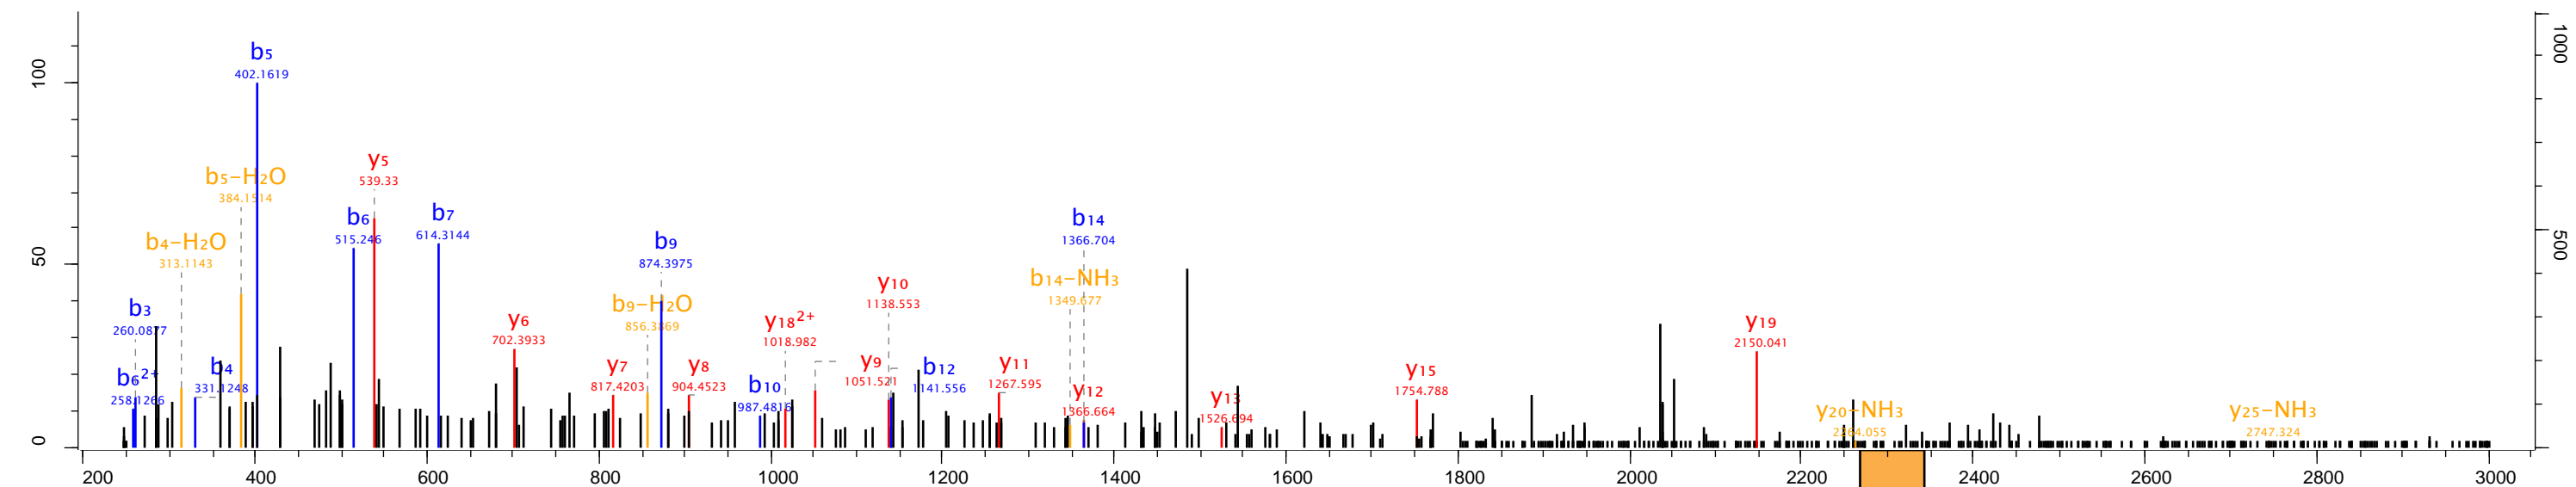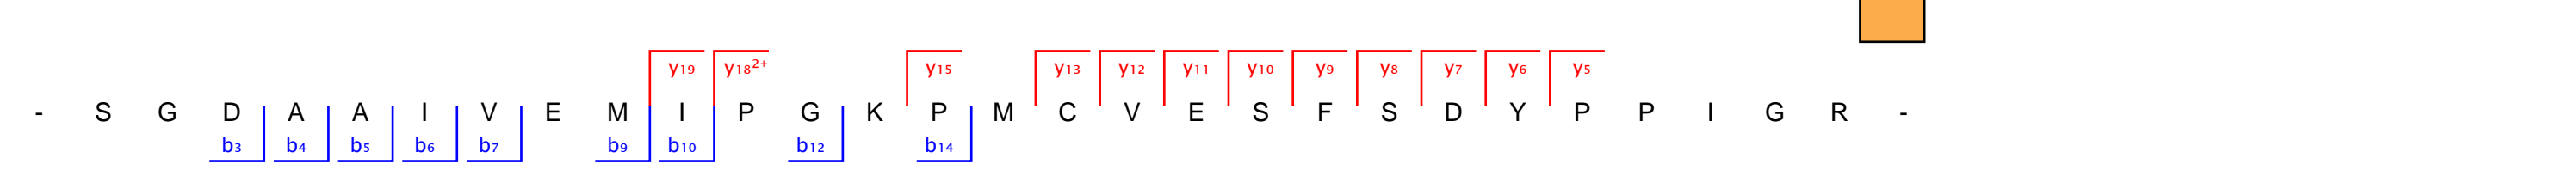

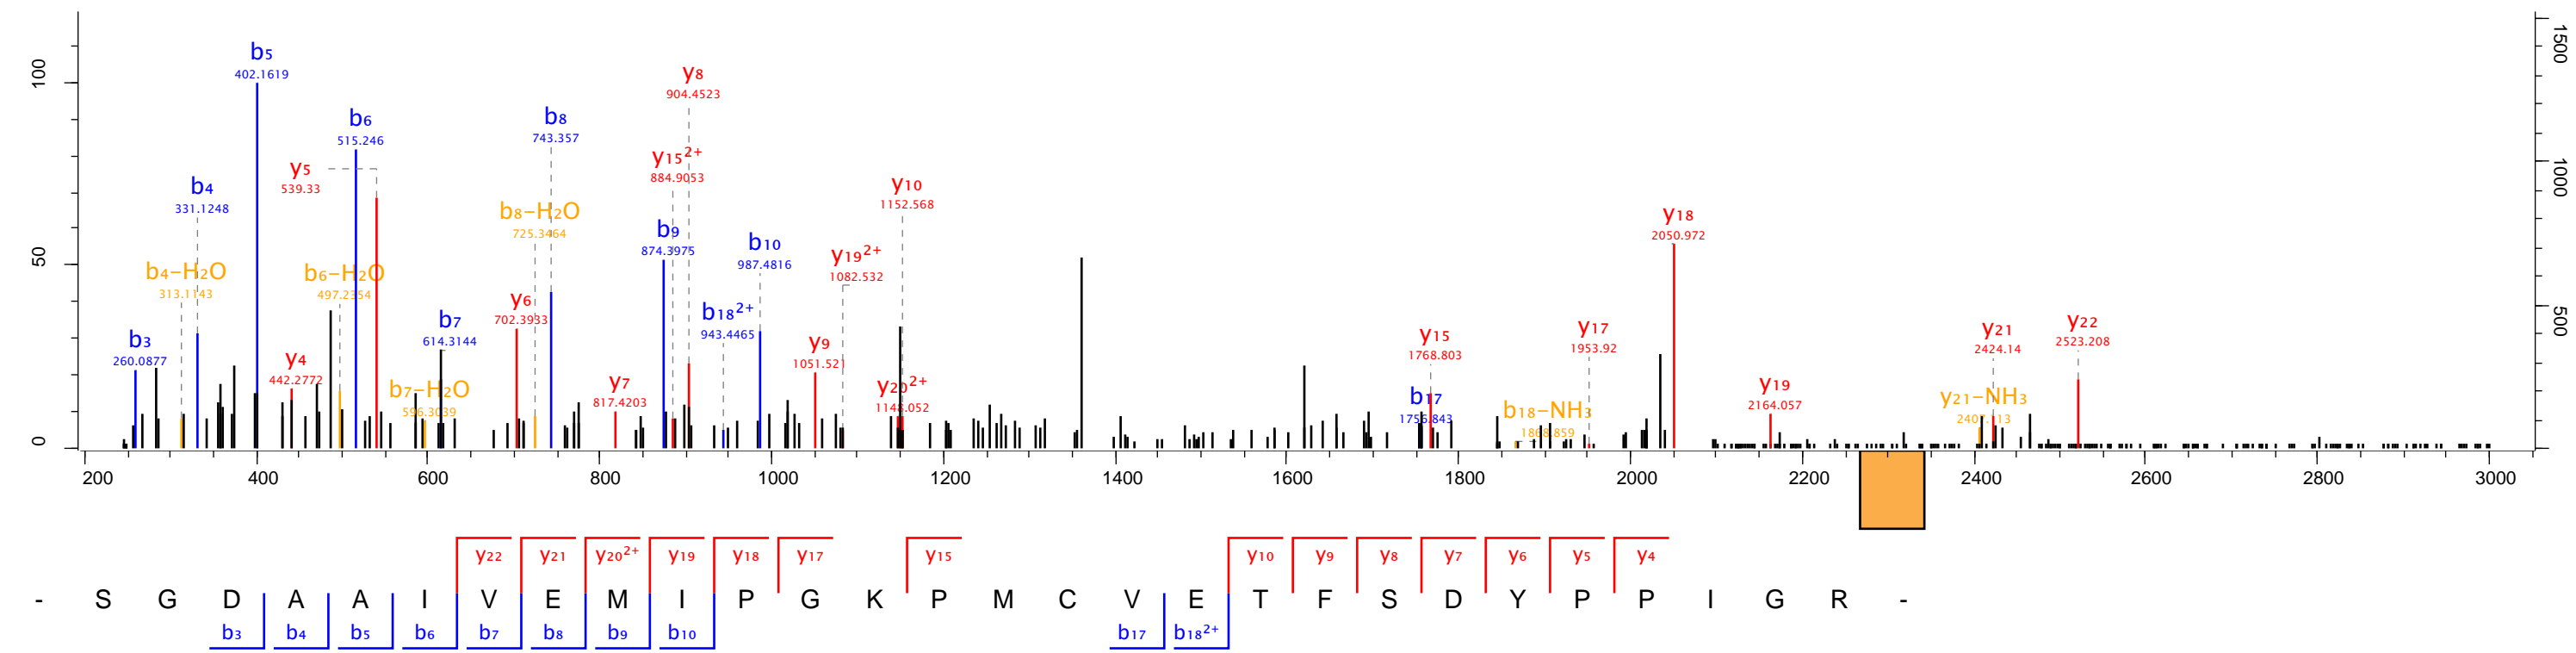

Raw file: 2014-10-22\_CL05\_Embx2dil\_4Hz  
 Scan: 6290 Method: TOF; CID Score: 72.9 m/z: 842.5

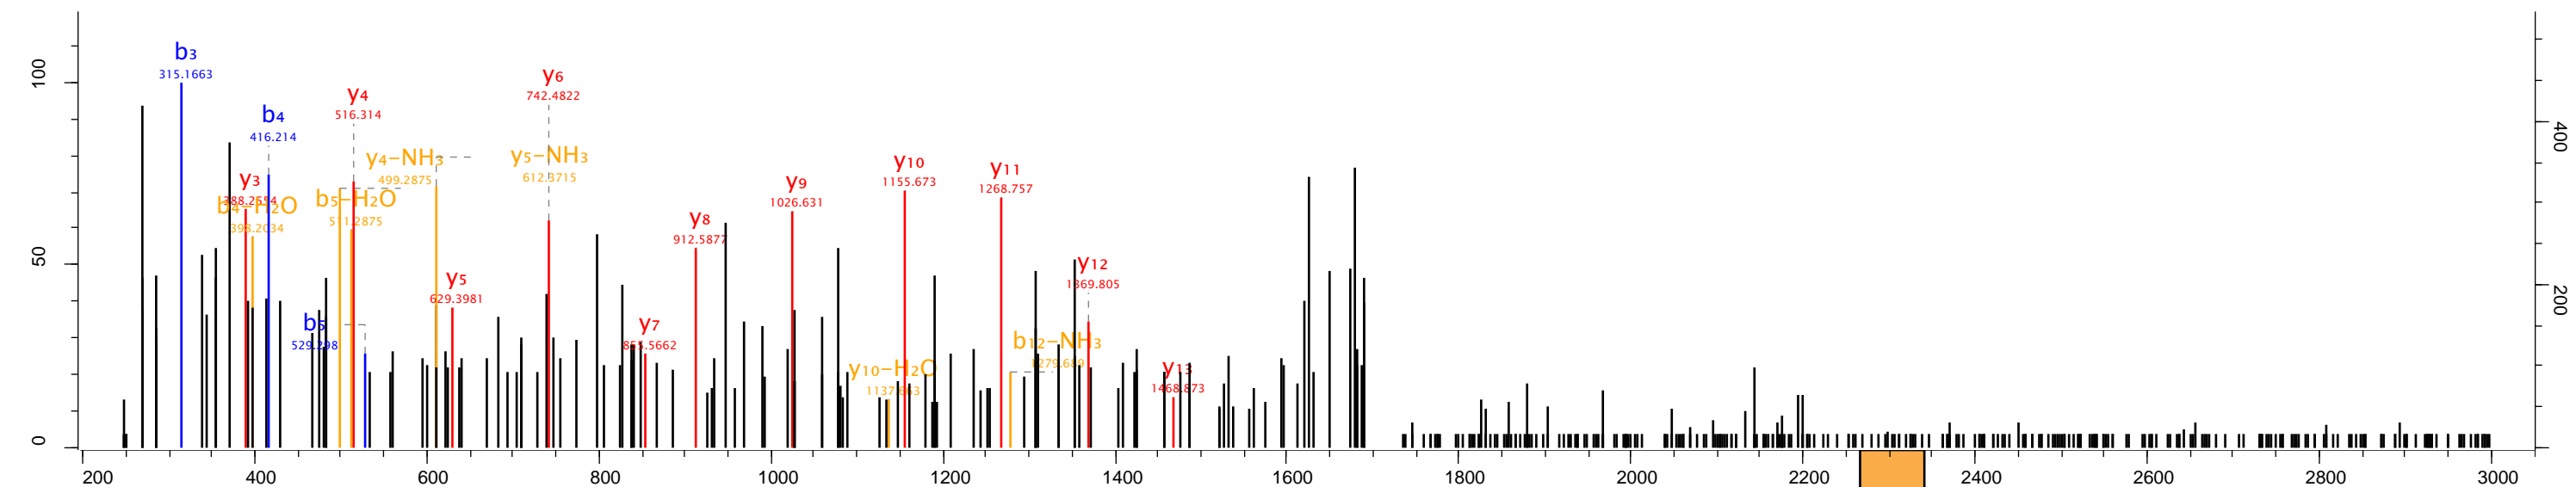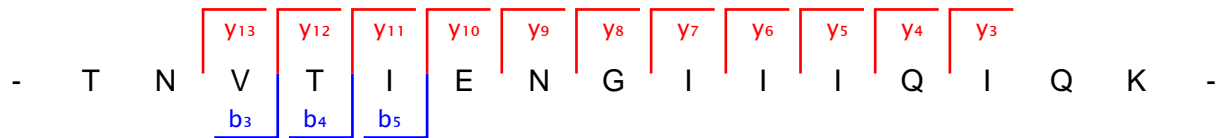

Spectral Annotation for Single-Peptide IDs in 16-cell Embryo using qQ-TOF

Raw file: 2014-10-22\_CL05\_Embx2dil\_4Hz  
 Scan: 6324 Method: TOF; CID Score: 56.53 m/z: 781.41

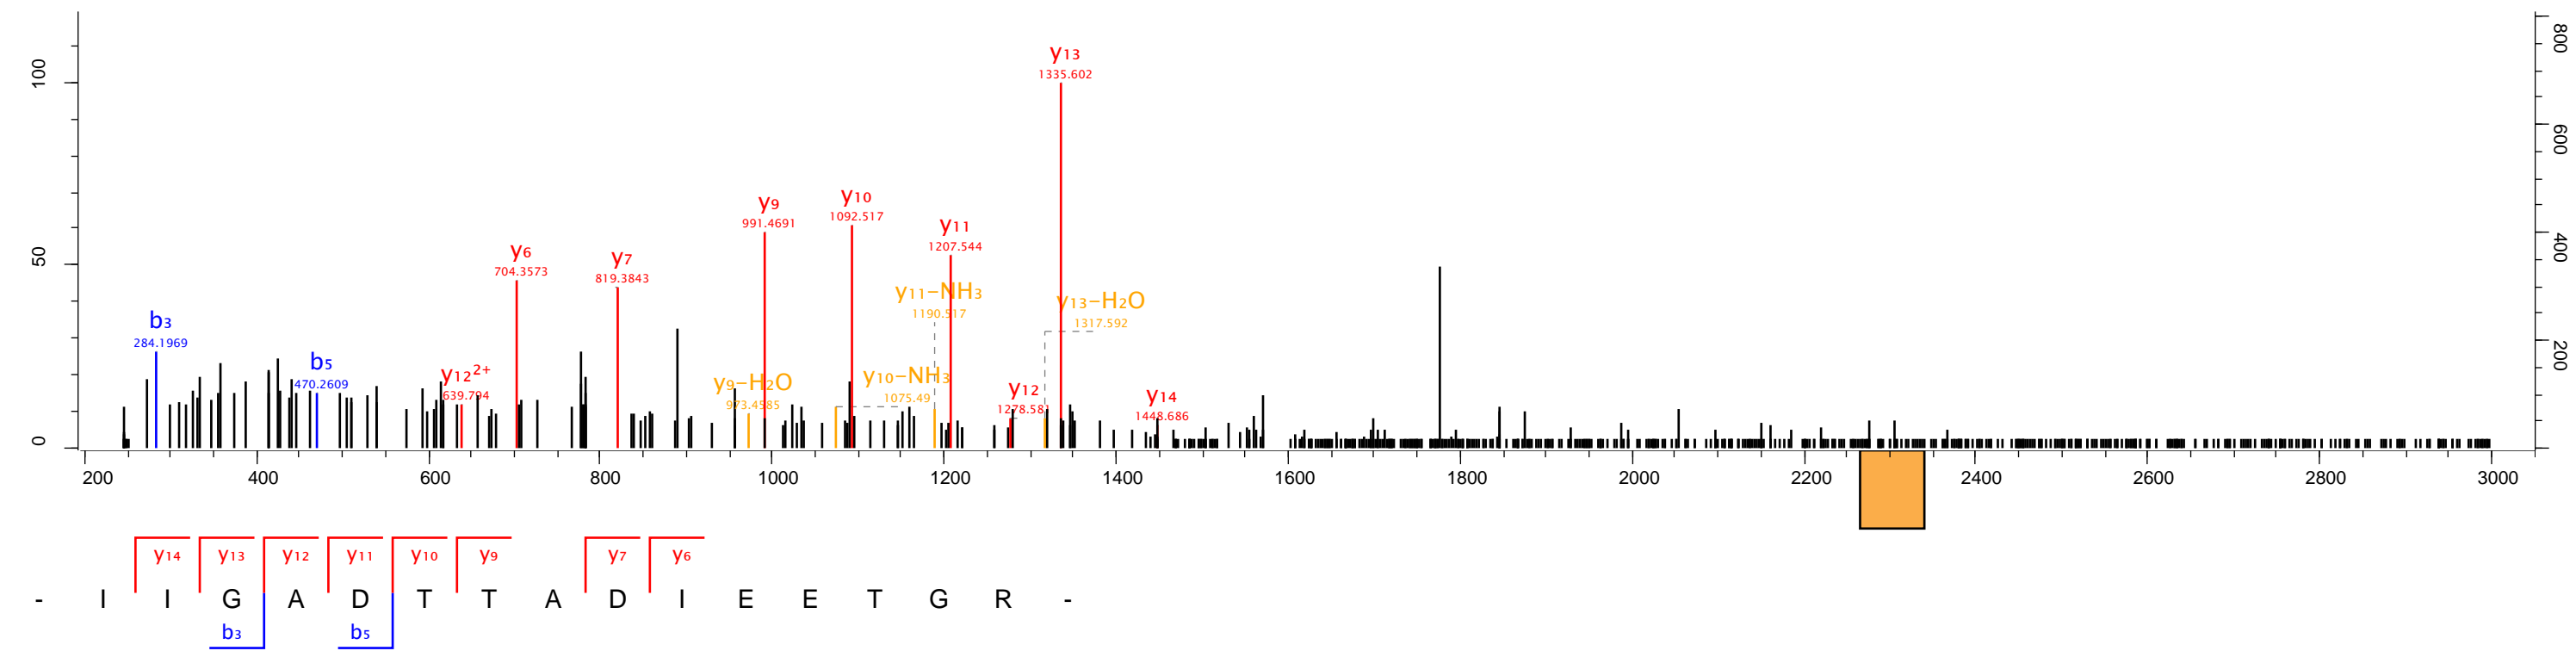

Spectral Annotation for Single-Peptide IDs in 16-cell Embryo using qQ-TOF

Raw file Scan Method Score m/z  
 2014-10-22\_CL05\_Embx2dil\_4Hz 6401 TOF; CID 34.93 837.98

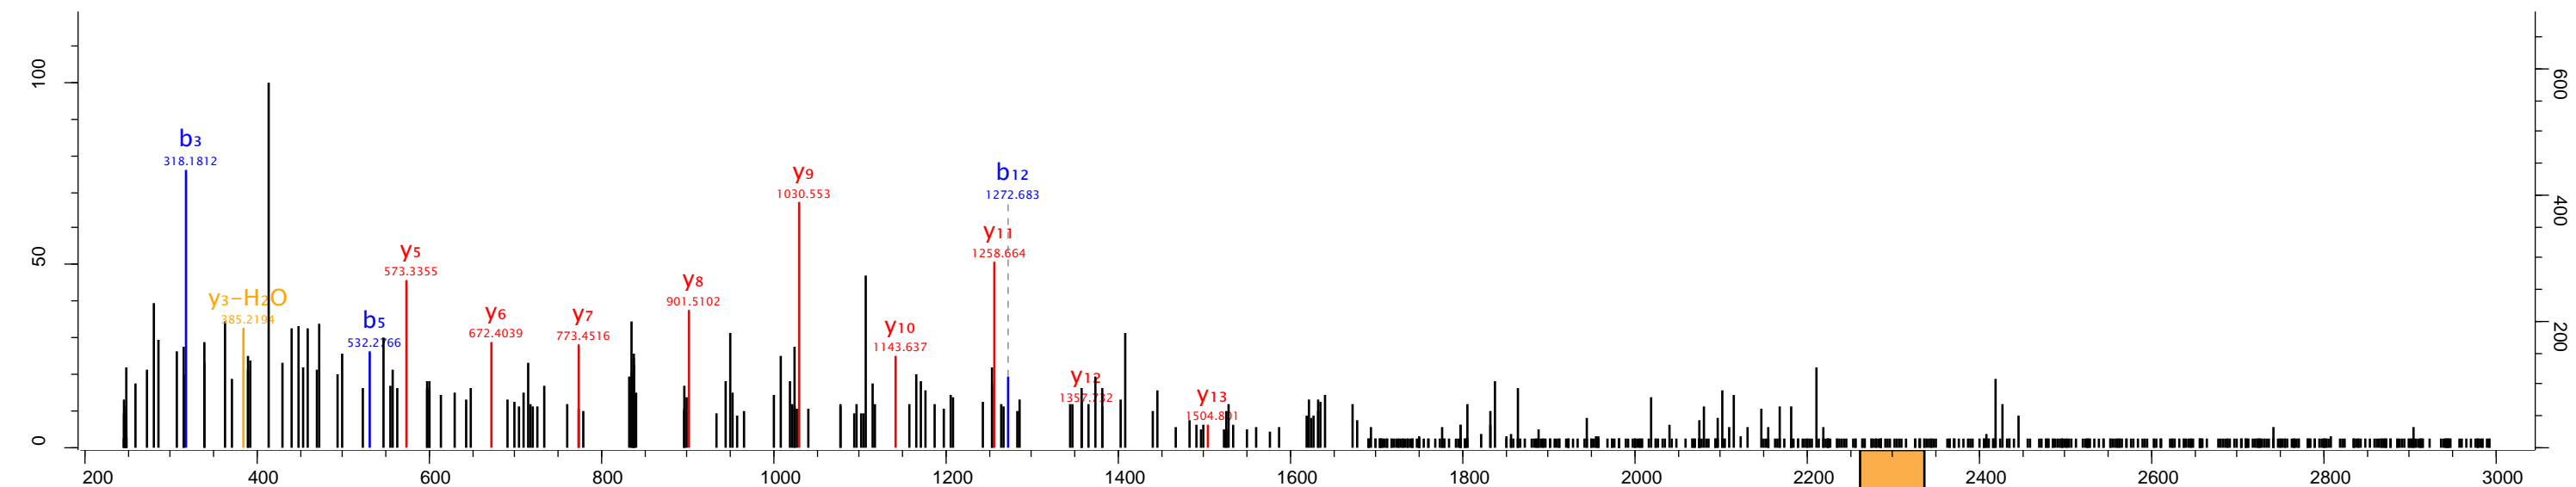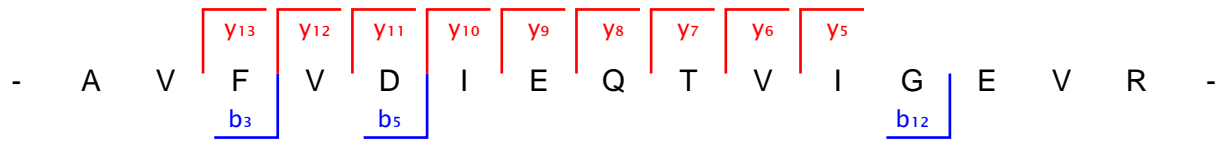



Raw file  
 2014-10-22\_CL05\_Embx2dil\_4Hz  
 Scan 6534 Method TOF; CID Score 42.06 m/z 1063.87

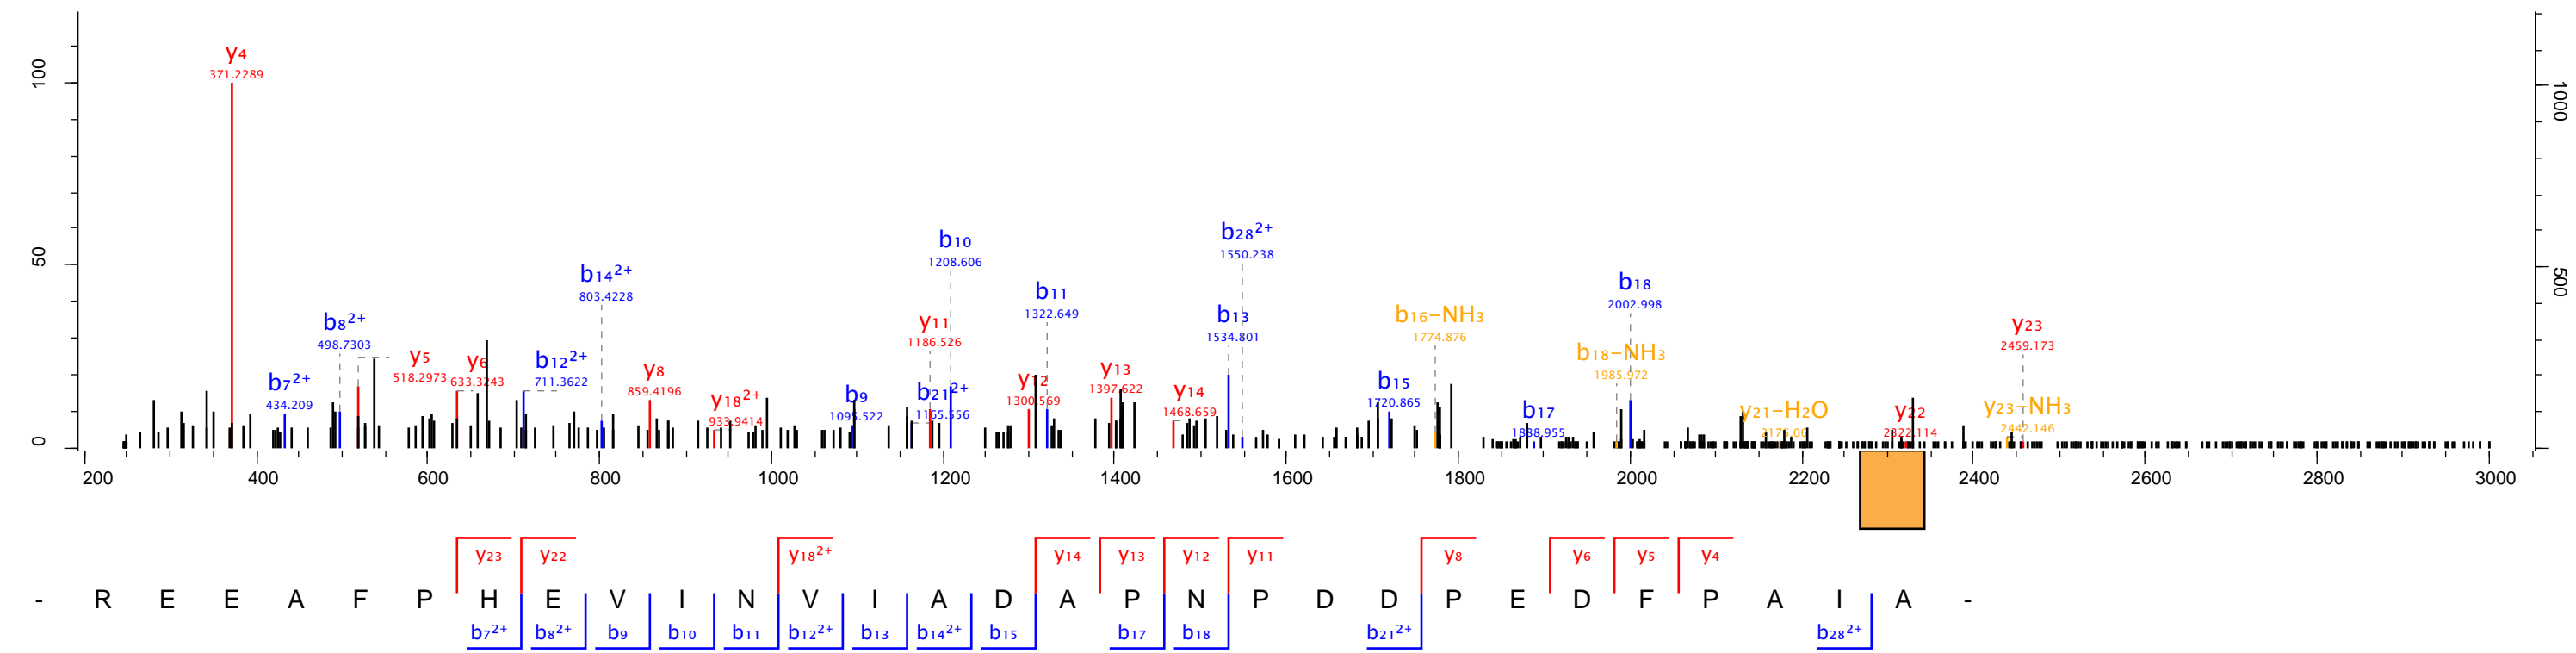

Spectral Annotation for Single-Peptide IDs in 16-cell Embryo using qQ-TOF

Raw file 2014-10-22\_CL05\_Embx2dil\_4Hz Scan 6553 Method TOF; CID Score 38.55 m/z 922.01

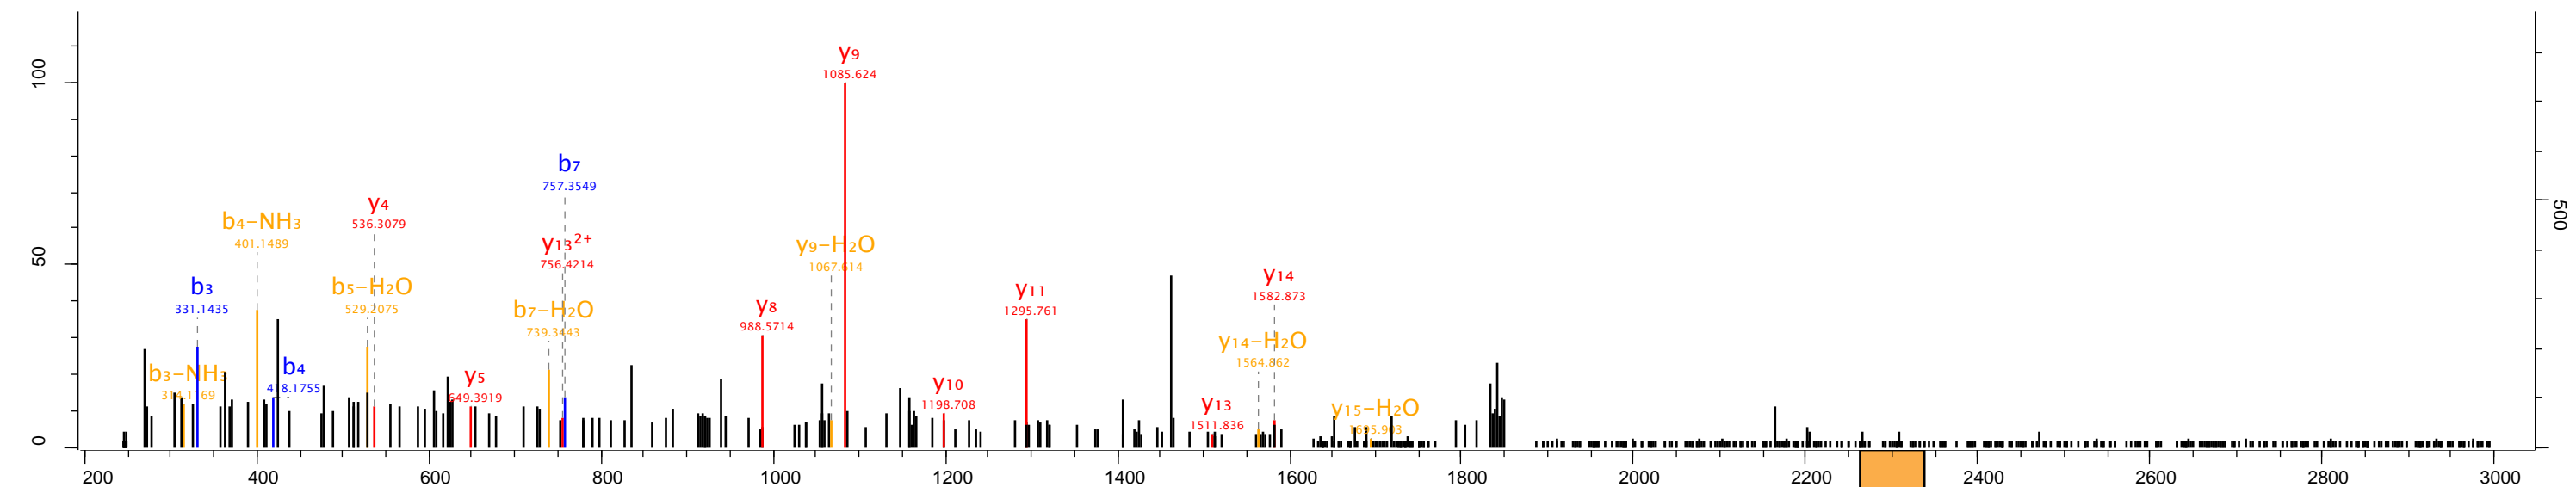

- Q M A S E P I P P E I I E F I K -

Fragmentation mapping:

- b3** (blue) covers A and S.
- b4** (blue) covers S.
- b7** (blue) covers I and P.
- y4** (red) covers P and E.
- y5** (red) covers I and I.
- y8** (red) covers P.
- y9** (red) covers P.
- y10** (red) covers I.
- y11** (red) covers P.
- y13** (red) covers S.
- y14** (red) covers A.

Raw file: 2014-10-22\_CL05\_Embx2dil\_4Hz  
 Scan: 6568 Method: TOF; CID Score: 91.66 m/z: 884.98

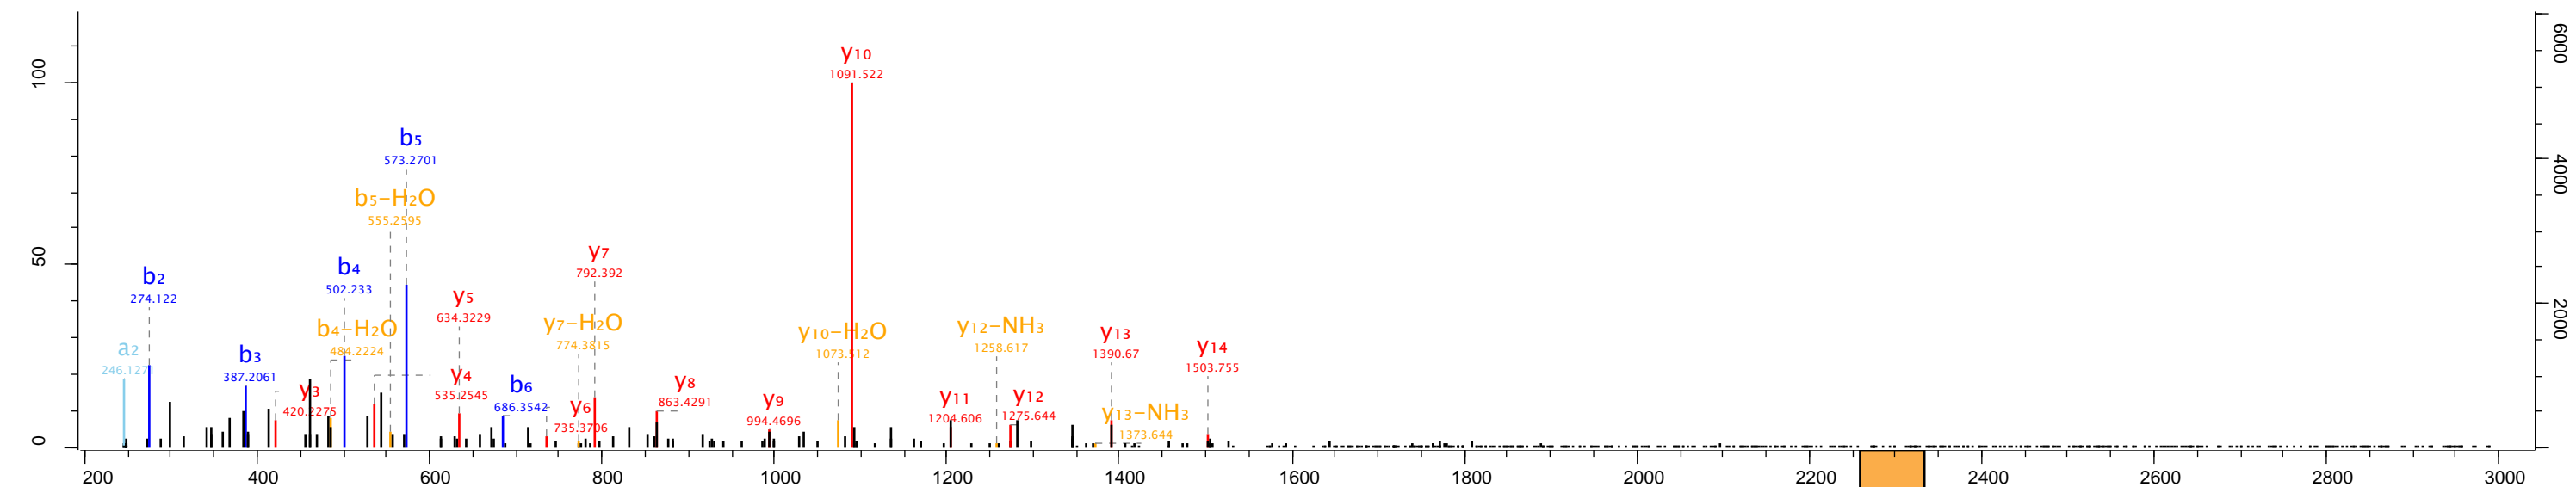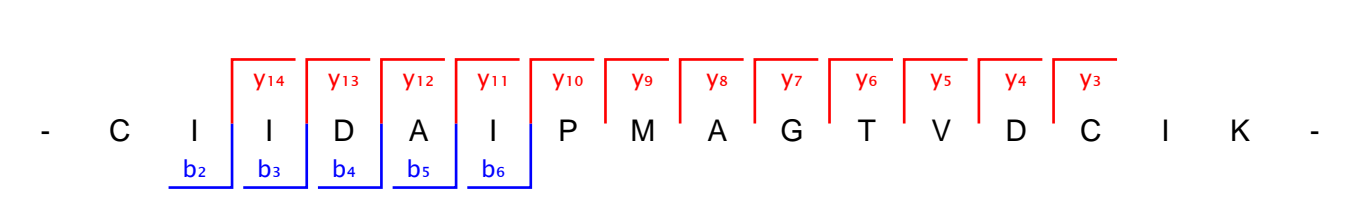

Raw file: 2014-10-22\_CL05\_Embx2dil\_4Hz  
 Scan: 6588 Method: TOF; CID Score: 42.06 m/z: 802.93

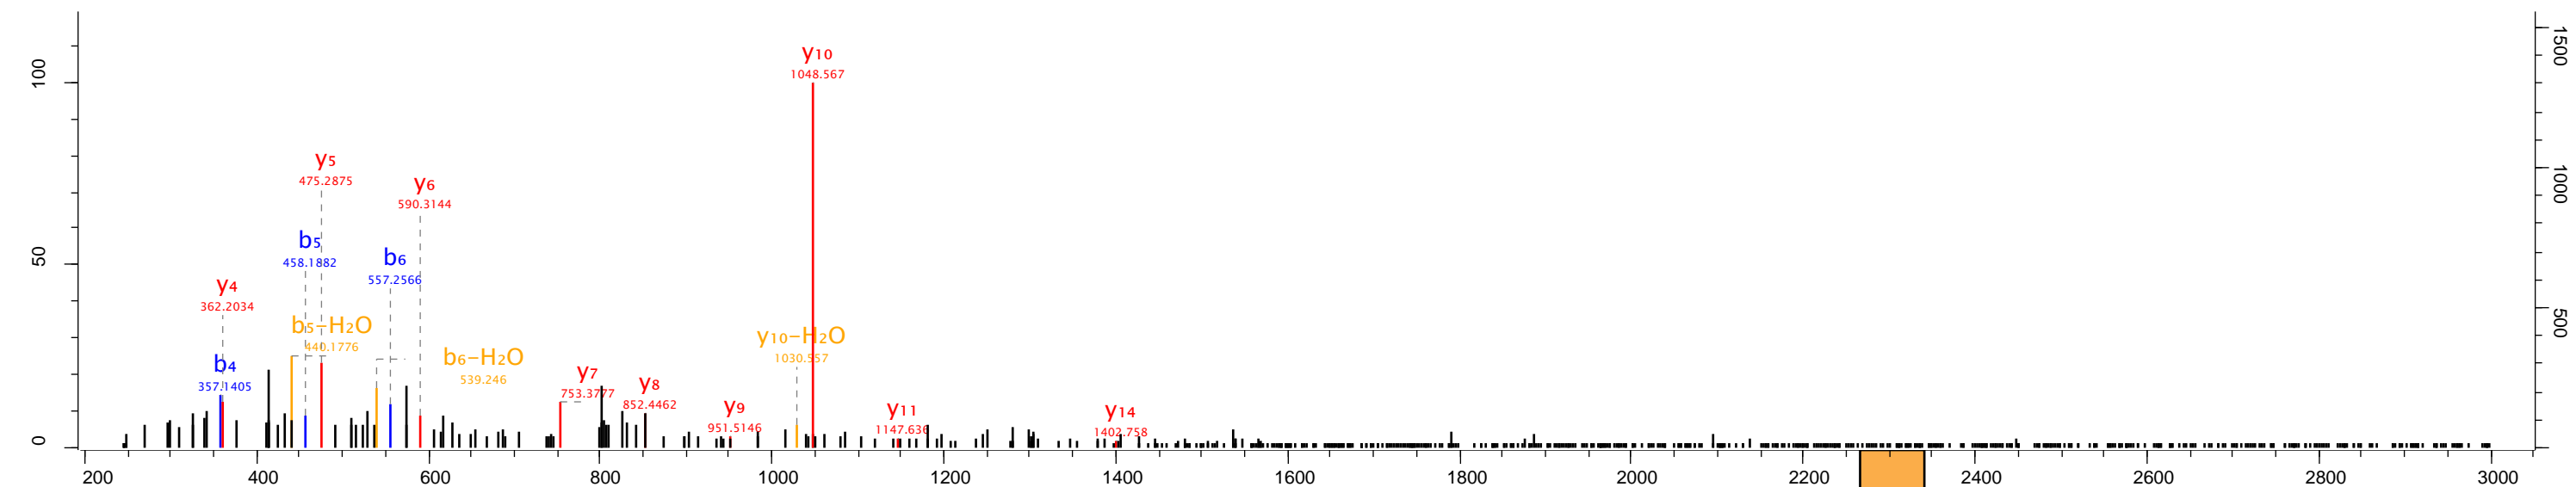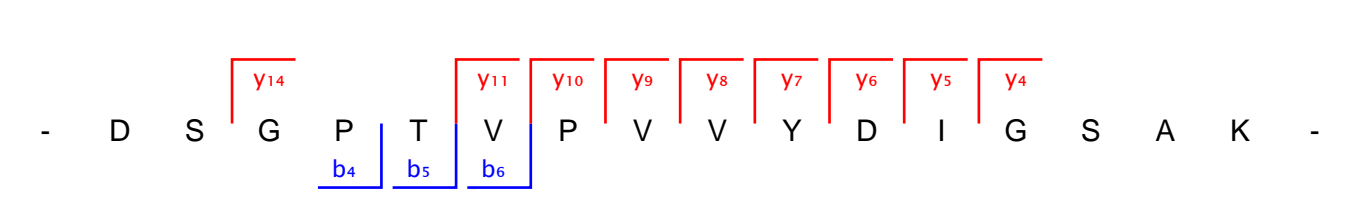

Raw file: 2014-10-22\_CL05\_Embx2dil\_4Hz  
 Scan: 6747 Method: TOF; CID Score: 40.97 m/z: 1054.05

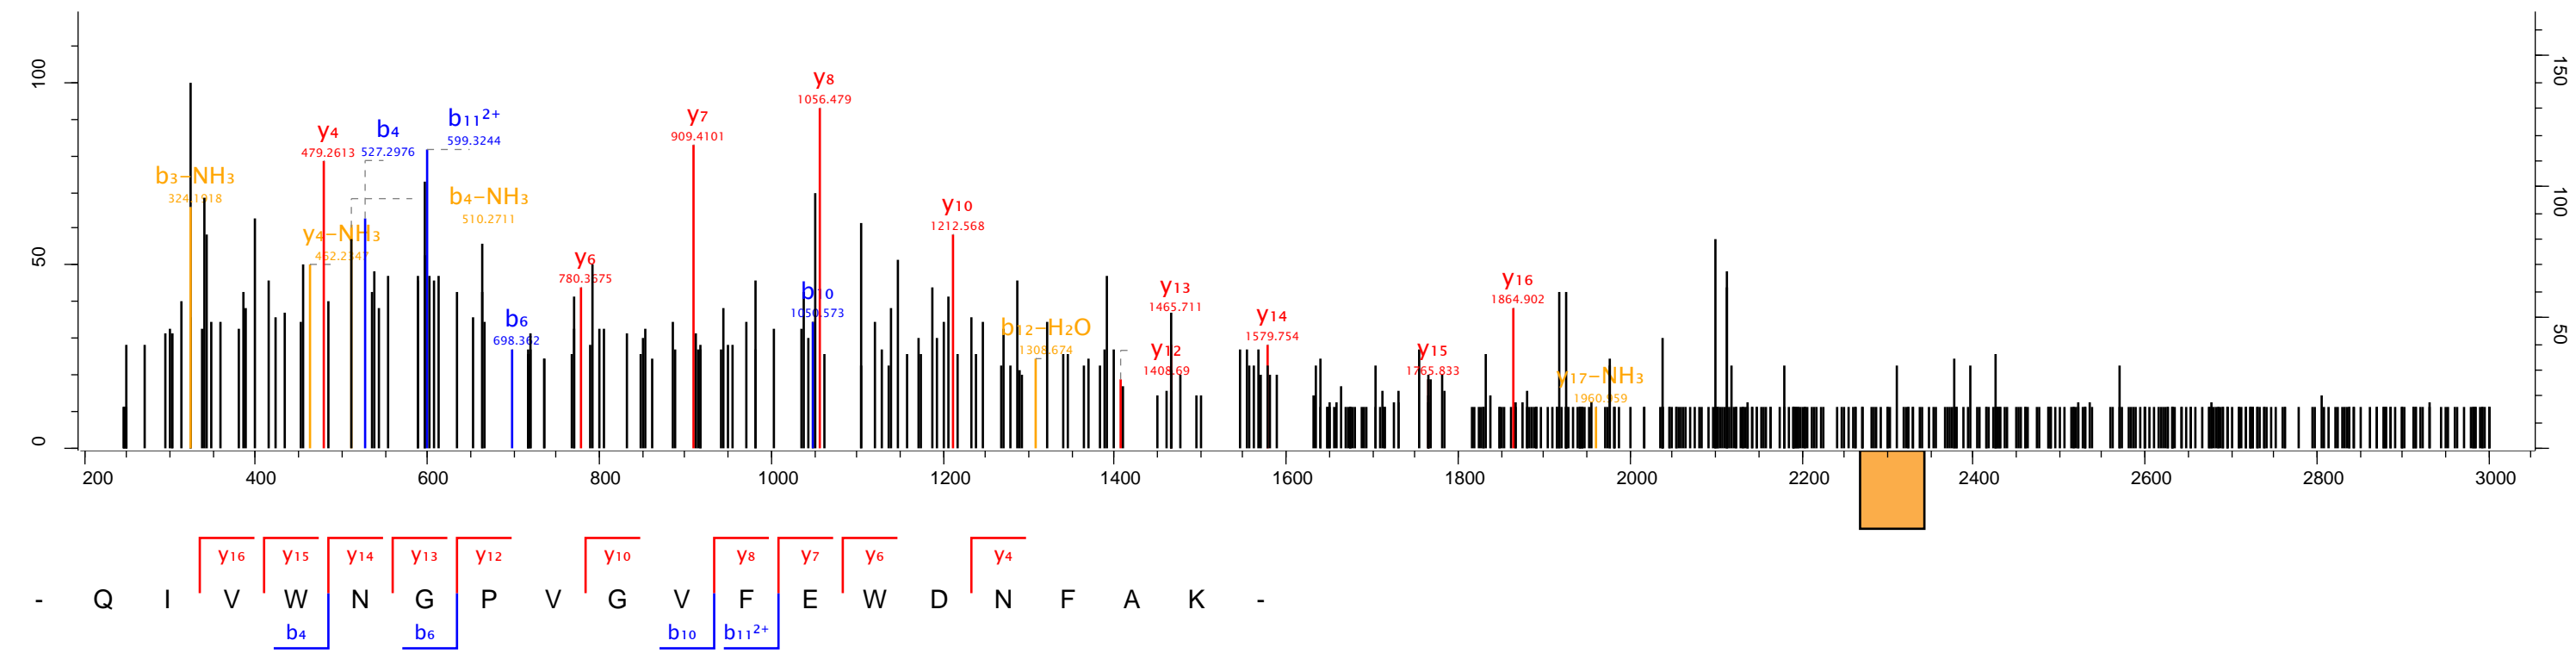

Spectral Annotation for Single-Peptide IDs in 16-cell Embryo using qQ-TOF

Raw file: 2014-10-22\_CL05\_Embx2dil\_4Hz  
 Scan: 6765 Method: TOF; CID Score: 33.67 m/z: 996.52

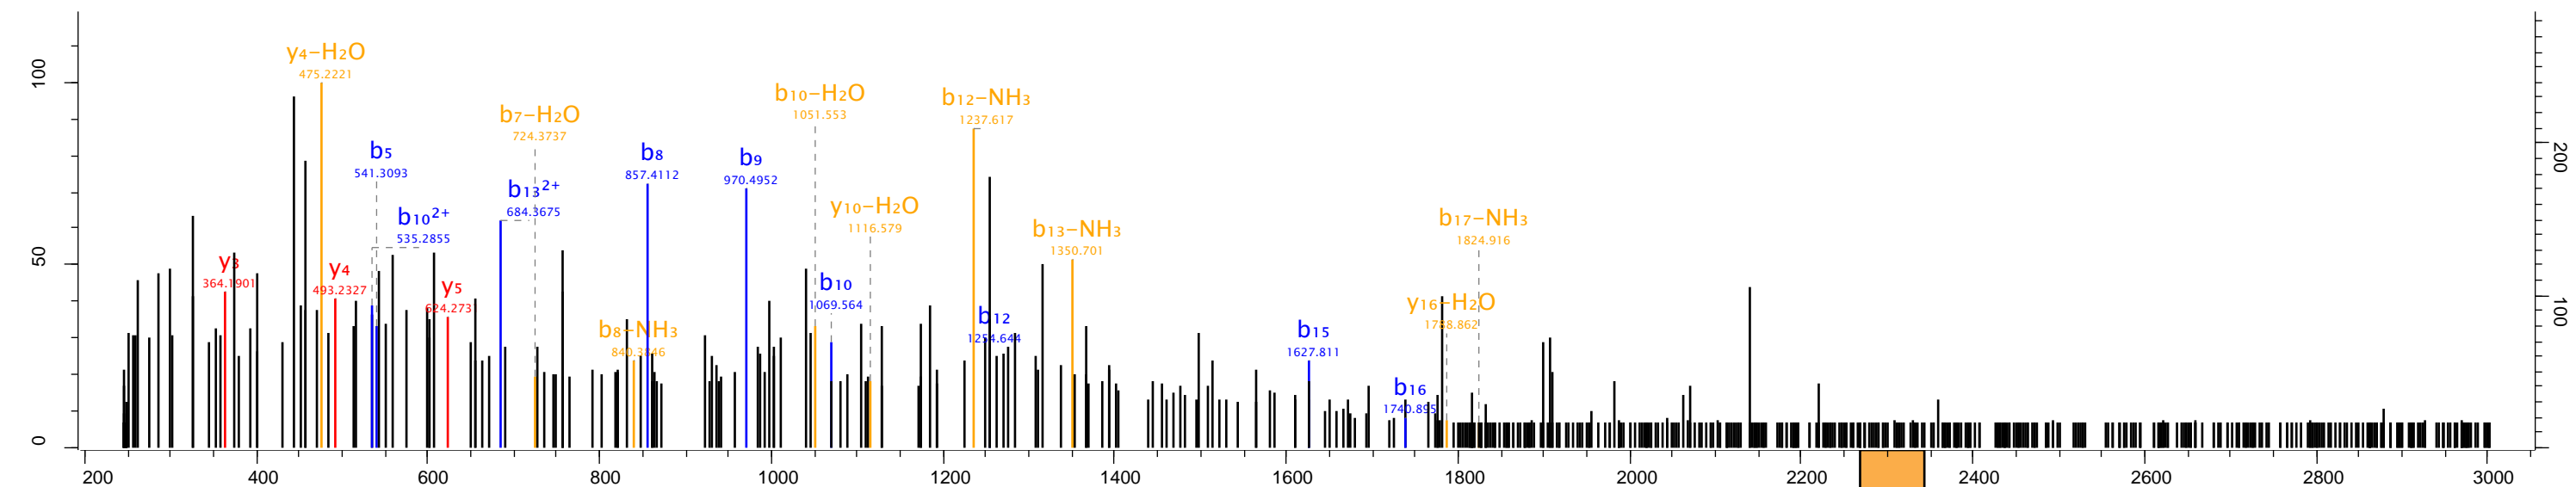

- A I K N N S N D I V N A I M E I T M -

Fragmentation mapping (b and y ions):

- b5: N N
- b8: D
- b9: I
- b10: V
- b12: A
- b13<sup>2+</sup>: I
- y3: E I
- y4: E
- y5: M

Spectral Annotation for Single-Peptide IDs in 16-cell Embryo using qQ-TOF

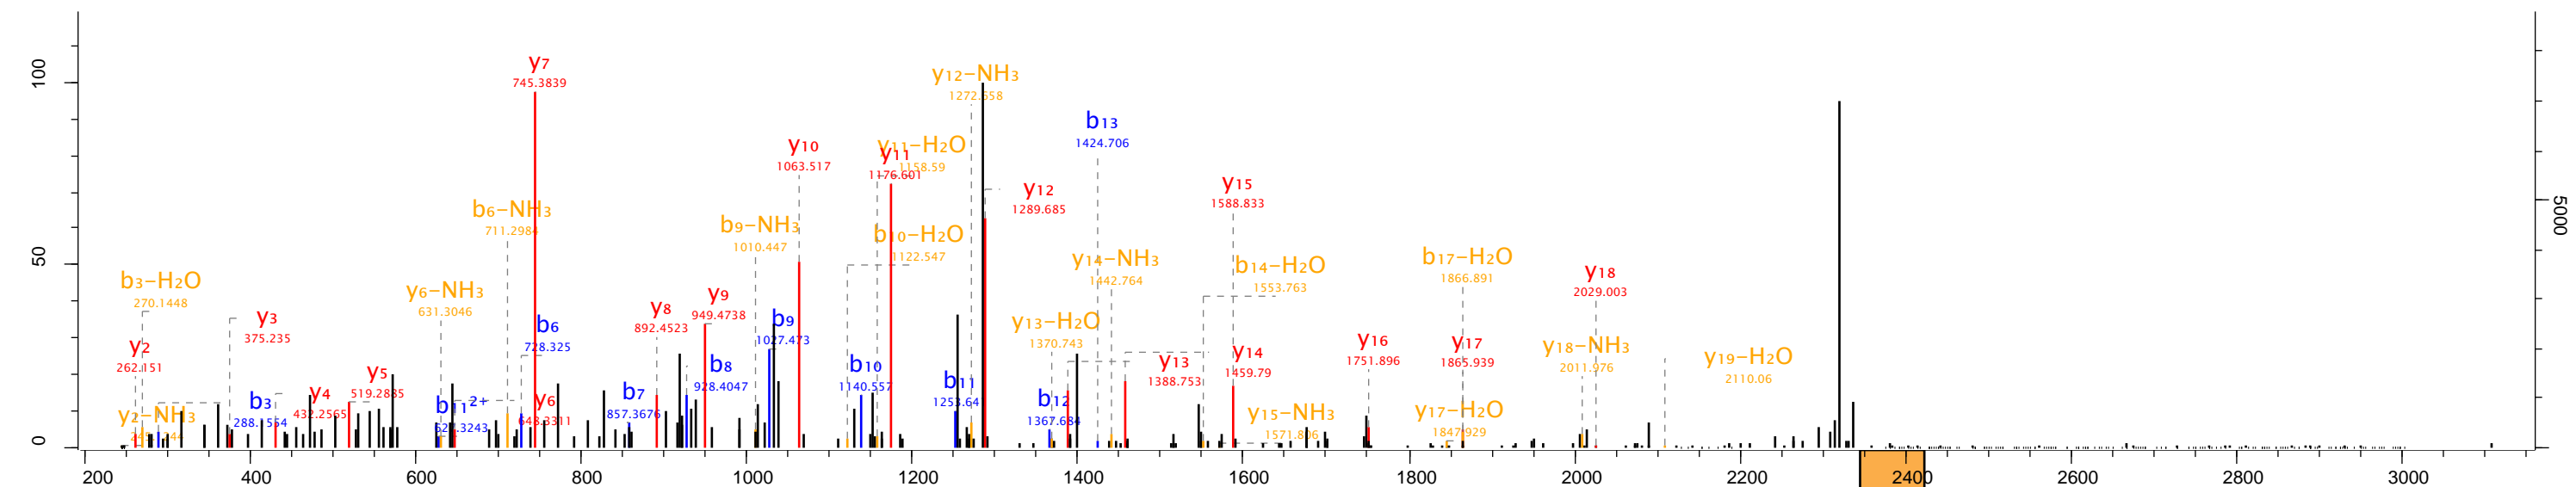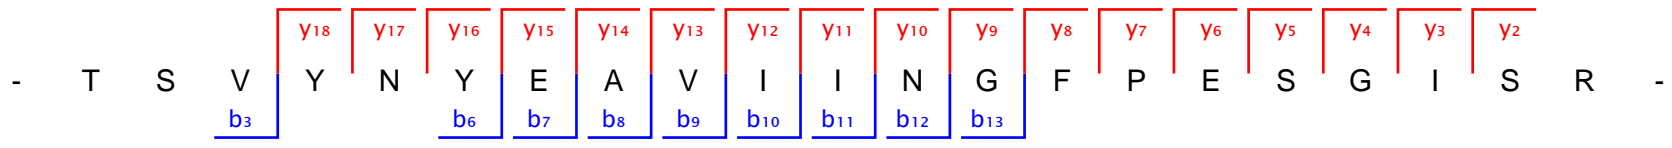

Raw file 2014-10-22\_CL05\_Embx2dil\_4Hz Scan 7233 Method TOF; CID Score 122.34 m/z 1108.56

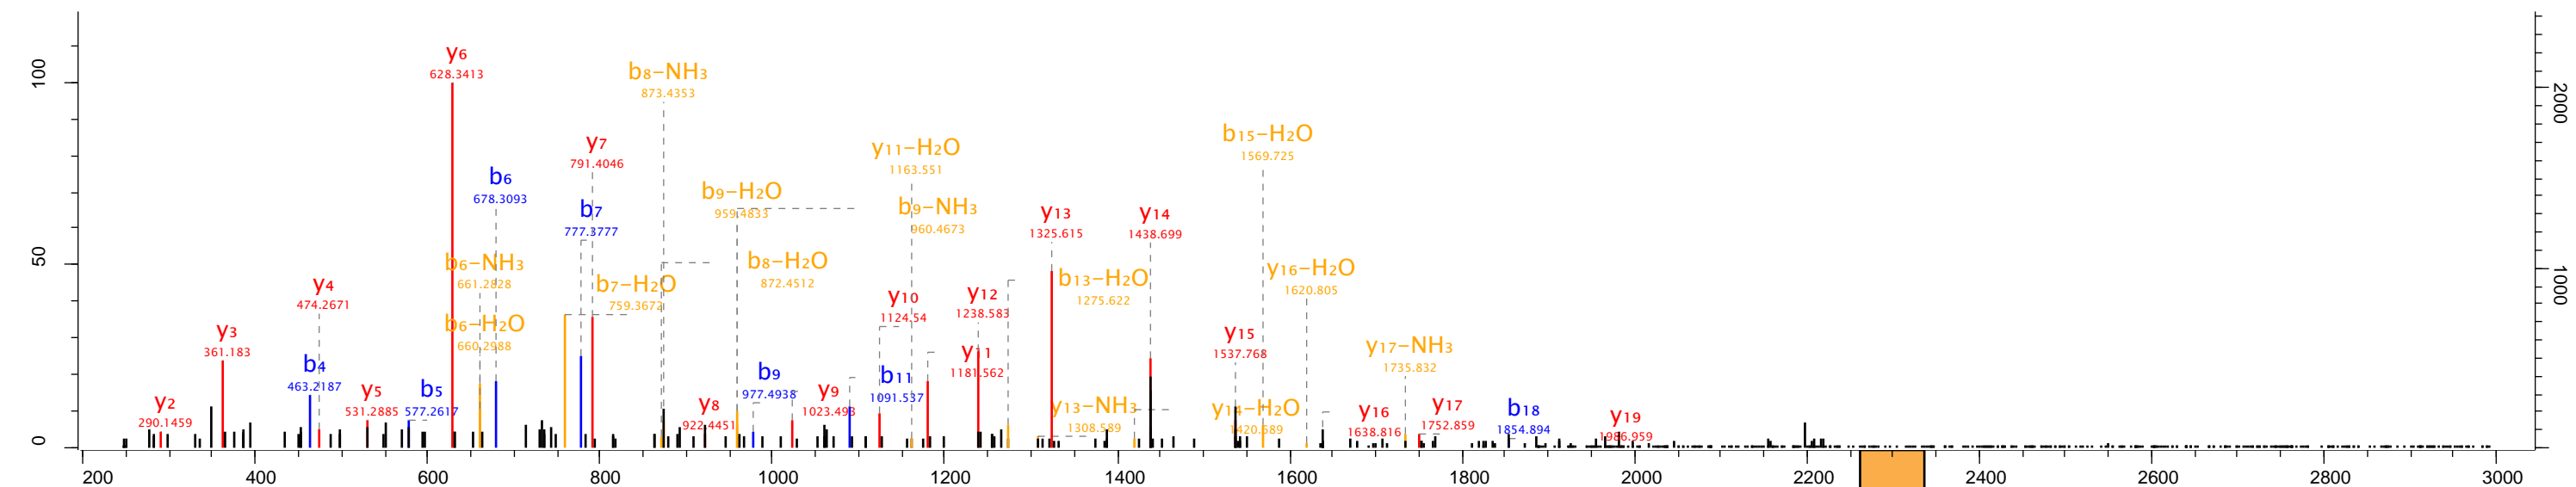

- D I Y A N T V I S G G T T M Y P G I A D R -

y19 y17 y16 y15 y14 y13 y12 y11 y10 y9 y8 y7 y6 y5 y4 y3 y2  
b4 b5 b6 b7 b9 b11 b18

Spectral Annotation for Single-Peptide IDs in 16-cell Embryo using qQ-TOF
